# Supplementary material for: Earthquake Response Analysis of Tall Reinforced Concrete Chimneys considering Eccentricity
Source: Hindawi journal article supplement (doi:10.1155/2020/1417969), 2020-03-11
Supplement: f1 [file 1417969.f1.zip]

Archive with 27 entries (22 files):
- 1417969.f1/Four kinds of earthquake records/
- 1417969.f1/Four kinds of earthquake records/Rock/
- 1417969.f1/Four kinds of earthquake records/Rock/LANDERS ABY000.txt
- 1417969.f1/Four kinds of earthquake records/Rock/LANDERS ABY-UP.txt
- 1417969.f1/Four kinds of earthquake records/Rock/MORGAN G01230.txt
- 1417969.f1/Four kinds of earthquake records/Rock/MORGAN G01-UP.txt
- 1417969.f1/Four kinds of earthquake records/Soft rock/
- 1417969.f1/Four kinds of earthquake records/Soft rock/LOMAP CLS000.txt
- 1417969.f1/Four kinds of earthquake records/Soft rock/LOMAP GGB360.txt
- 1417969.f1/Four kinds of earthquake records/Soft rock/LOMAP GGB-UP.txt
- 1417969.f1/Four kinds of earthquake records/Soft rock/LOMAPCLS-UP.txt
- 1417969.f1/Four kinds of earthquake records/Soft soil/
- 1417969.f1/Four kinds of earthquake records/Soft soil/CHICHI CHY004-N.txt
- 1417969.f1/Four kinds of earthquake records/Soft soil/CHICHI CHY004-V.txt
- 1417969.f1/Four kinds of earthquake records/Soft soil/IMPVALL H-E03140.txt
- 1417969.f1/Four kinds of earthquake records/Soft soil/IMPVALL H-E03-UP.txt
- 1417969.f1/Four kinds of earthquake records/Stiff soil/
- 1417969.f1/Four kinds of earthquake records/Stiff soil/BORREGO B-ELC000.txt
- 1417969.f1/Four kinds of earthquake records/Stiff soil/BORREGO B-ELC-UP.txt
- 1417969.f1/Four kinds of earthquake records/Stiff soil/CHICHI CHY028-N.txt
- 1417969.f1/Four kinds of earthquake records/Stiff soil/CHICHI CHY028-V.txt
- 1417969.f1/Four kinds of earthquake records/Stiff soil/CHICHI TCU076-N.txt
- 1417969.f1/Four kinds of earthquake records/Stiff soil/CHICHI TCU076-V.txt
- 1417969.f1/Four kinds of earthquake records/Stiff soil/MORGAN G03090.txt
- 1417969.f1/Four kinds of earthquake records/Stiff soil/MORGAN G03-UP.txt
- 1417969.f1/Four kinds of earthquake records/Stiff soil/MORGAN HVR240.txt
- 1417969.f1/Four kinds of earthquake records/Stiff soil/MORGAN HVR-UP.txt
