# Supplementary material for: Earthquake Response Analysis of Tall Reinforced Concrete Chimneys considering Eccentricity
Source: Hindawi journal article supplement (doi:10.1155/2020/1417969), 2020-03-11
Supplement: f1 [file 1417969.f1.zip › 1417969.f1/Four kinds of earthquake records/Rock/LANDERS ABY-UP.txt]

PEER STRONG MOTION DATABASE RECORD. PROCESSING BY CDMG.
LANDERS 06/28/92 1158, AMBOY,  UP (CDMG STATION 21081)
ACCELERATION TIME HISTORY IN UNITS OF G. FILTER POINTS: HP=0.1 Hz LP=23.0 Hz
NPTS=  2500, DT= .02000 SEC
  -.1076389E-01  -.2039343E-02   .9839043E-02   .7703649E-02  -.1410653E-01
  -.1518317E-01   .1074367E-01   .1380211E-01   .4618511E-02  -.6427612E-02
  -.7308417E-02   .7008776E-02   .1260089E-01   .9621385E-03  -.9060324E-03
   .1042357E-01   .2045761E-02  -.1482974E-02  -.1875519E-01  -.2298977E-01
   .1700812E-02  -.1796309E-02  -.8578851E-02   .4863446E-03   .1289306E-01
   .3949133E-02  -.1413575E-02   .1918195E-02  -.4702175E-02   .3408292E-02
   .1714712E-01   .9027343E-02  -.1825007E-01  -.1247251E-02   .3467759E-01
   .2320405E-01   .1570287E-02  -.5508076E-02   .1072379E-02   .9909073E-02
   .1059801E-01   .1236304E-01   .1336663E-03  -.9470226E-02  -.8048984E-03
   .5677627E-02   .1745951E-02   .1105081E-01  -.5524784E-02  -.1640980E-01
   .1206697E-01   .5700552E-02  -.2726271E-02  -.9974996E-02  -.2591310E-01
  -.2271601E-01  -.9457406E-03  -.4241111E-03  -.1763008E-01  -.1936980E-01
  -.1373185E-01  -.1174041E-01  -.7974164E-02   .1501704E-01   .1509190E-01
  -.6452837E-03   .1024055E-01   .1125177E-01   .8814364E-02   .1485038E-02
  -.1824469E-02  -.2525839E-02   .1298467E-01   .2094922E-01   .1526209E-01
   .1419555E-01  -.1322880E-01   .2133800E-02   .6173381E-02  -.2670658E-02
  -.1093636E-01  -.2299646E-01  -.1153026E-01  -.5094708E-02  -.5899114E-02
  -.9613581E-02  -.1453675E-01  -.8477580E-02  -.9770570E-02  -.1112578E-01
  -.6988296E-02  -.1270809E-01   .3178773E-02   .2681662E-01   .1690870E-01
  -.8802083E-02   .1723276E-01   .1742181E-01  -.1008209E-02   .6710486E-02
  -.3651339E-02  -.1207109E-01   .1483380E-01   .2398763E-01   .6811184E-02
   .1127709E-01   .4154589E-03   .1291844E-03  -.1332131E-02  -.1563219E-01
   .2012425E-01   .1072019E-01  -.1636863E-01  -.5461428E-02   .1195428E-02
  -.5429136E-02  -.2305440E-01  -.5976208E-02   .2286054E-01   .2591883E-01
   .5713985E-02   .5653534E-03   .4973101E-02  -.4390173E-02  -.8551448E-02
  -.1178452E-01  -.1359878E-01  -.1974540E-02  -.9091781E-02  -.1494218E-01
  -.2320383E-02   .1211497E-01   .2217045E-01  -.3237986E-01  -.3516312E-01
   .3681145E-01   .1195028E-01  -.5495529E-01  -.8870361E-02   .6491980E-01
   .9845212E-02  -.2085954E-01   .9563282E-02   .3808744E-02  -.2336454E-02
  -.1296773E-02   .1475629E-01   .2085720E-01  -.6516238E-02  -.1076118E-01
   .3587452E-02   .2441266E-02  -.2834102E-01  -.1704219E-01  -.3724779E-02
   .3300104E-03   .3711598E-02   .1636295E-01   .1602255E-01  -.1534828E-01
   .8954521E-02   .1622026E-01   .7457724E-02  -.1239527E-01  -.2528779E-01
  -.8858378E-02  -.3687720E-02  -.3551348E-01  -.3695753E-01   .1826758E-01
   .3769784E-01  -.1335697E-01  -.3484198E-01  -.4040771E-02   .1567304E-01
   .1832224E-01  -.9775428E-02  -.1985786E-01  -.1021259E-02   .4771584E-02
  -.1536295E-01  -.3563009E-01  -.6800553E-02   .1892309E-01   .3610084E-02
   .1849010E-01   .1052110E-01  -.2547909E-02  -.1326715E-02   .6681557E-02
   .1915029E-01  -.3046701E-02  -.4204151E-02  -.1647031E-03   .7078564E-02
  -.1941049E-02   .1512584E-01   .3011906E-01   .1012583E-02  -.2039799E-01
  -.9529653E-02   .8489907E-02  -.4950394E-02   .2132606E-01   .2160986E-01
  -.9717164E-02   .6778512E-02   .2215729E-01  -.9881701E-02  -.4069363E-01
   .2709274E-01   .6806637E-01   .6186262E-02  -.2599247E-01  -.1375734E-01
  -.4863736E-02  -.1769409E-01  -.5225388E-02   .1320012E-01  -.2381619E-03
  -.1858060E-01   .2704979E-02   .9452498E-02  -.3415228E-01  -.1179163E-01
   .3634137E-01   .4710366E-02  -.3530606E-01  -.1659599E-01   .2661826E-02
  -.1996156E-01  -.1459921E-01   .2427014E-01   .1034123E-01  -.2105417E-01
  -.8454919E-02   .2561431E-01  -.1902029E-02  -.1646436E-01   .3224594E-01
   .2233684E-01  -.8169118E-02  -.5189192E-03  -.2857580E-02  -.2448444E-01
  -.1228912E-01   .2547453E-01   .1074593E-01  -.9879299E-02  -.1319104E-01
   .5902528E-02  -.1784000E-02   .2811290E-02   .2005356E-01  -.3964190E-02
   .3022997E-02  -.4060553E-03  -.1102611E-01   .6867363E-03   .7148621E-02
  -.1225976E-01  -.1315105E-01   .6089287E-03   .1730345E-01   .1494437E-01
  -.2267203E-01  -.1318931E-03   .4217176E-01   .6938080E-02  -.3872714E-01
  -.1840959E-01   .4319244E-02   .6506297E-02   .1381885E-01  -.2806320E-01
  -.3352717E-01   .1258210E-01   .1587789E-01  -.3880363E-02  -.1047657E-02
   .5336689E-02   .8529454E-02  -.3733841E-02  -.1098588E-01   .1154506E-01
   .8229860E-03   .4068787E-02   .1987997E-01   .7471826E-02  -.2590316E-02
  -.2262738E-02   .4486758E-02   .1298394E-02   .6253708E-02  -.7175457E-02
  -.2253242E-01   .4985288E-02   .9411220E-02  -.8072449E-02   .3277240E-02
   .1591723E-01  -.1044554E-01  -.2555465E-01   .2954492E-02   .1598106E-01
  -.4757437E-02  -.1447993E-01  -.2013467E-01  -.8359647E-02  -.3270053E-03
  -.2111344E-01  -.2048804E-01   .1196645E-01   .2253277E-01  -.5779228E-02
  -.3342312E-02   .1491990E-01   .1502102E-01  -.4500625E-02   .9585482E-03
   .1853328E-01  -.5946465E-03  -.1897695E-01   .3901775E-02   .2119702E-01
  -.8562655E-03  -.3020664E-01  -.2694050E-02   .4691888E-01   .9877703E-02
  -.1999491E-01   .3895653E-02   .1238626E-01   .4538499E-02  -.1133598E-02
   .1305343E-02   .8542363E-02   .5039803E-02  -.7680497E-02   .1330000E-01
   .3039430E-01  -.1492824E-02  -.2101755E-01   .9666273E-03   .2595368E-01
   .8232316E-02  -.1336199E-01  -.6847137E-02  -.9616268E-03  -.3173896E-02
  -.1244965E-02   .2976924E-02  -.1240457E-01  -.2205570E-01  -.2067145E-01
  -.2509225E-02   .7965261E-02   .1029199E-01   .7753310E-02  -.1265985E-01
  -.7675003E-02   .1617474E-01   .2279872E-01  -.3374378E-02  -.2600094E-01
  -.7553118E-02   .1408628E-01   .4040987E-03  -.1764368E-01  -.3434711E-01
  -.1969369E-01  -.8074777E-02  -.2098278E-01  -.1825317E-01  -.2183994E-02
   .3436584E-03  -.1362107E-01  -.1311812E-01   .2351323E-01   .1445266E-01
  -.1704485E-01   .3954999E-02   .3375643E-01   .2601981E-01  -.4548479E-02
   .2404731E-01   .3353849E-01   .1608496E-02  -.1258676E-01  -.5516969E-03
   .5056345E-02   .3544787E-02   .4814768E-02  -.1939591E-02  -.2609923E-01
  -.1460579E-01   .4526727E-01   .2361988E-01  -.2048586E-01   .1515710E-01
   .2488695E-01   .1897103E-01   .2150682E-01   .6578177E-02  -.1338519E-01
  -.1776602E-01   .6655916E-02  -.1926527E-01  -.4515688E-01   .8095350E-02
   .4932382E-01  -.6153122E-03  -.5074110E-01  -.4974656E-02   .1844767E-01
  -.1066612E-01  -.1137904E-01   .3167115E-01   .2835621E-01  -.3943598E-01
  -.2544560E-01   .1206088E-01   .1020466E-02   .8386967E-02   .1811987E-01
  -.1359595E-01  -.9434291E-02   .1186541E-01  -.9892154E-02  -.2109067E-01
  -.6608658E-02   .1670452E-01  -.7652004E-02  -.3558975E-01  -.1388715E-01
   .9536180E-02   .1745551E-01  -.9016492E-02  -.2966124E-01   .1284935E-01
   .2343496E-01  -.6562164E-02  -.2807494E-02   .1168166E-01  -.8403116E-02
  -.3300750E-01   .9296023E-02   .2837517E-01   .8267957E-02   .2413203E-02
  -.2007877E-01  -.2122645E-02   .8996419E-02   .4431964E-02   .1101305E-01
   .3653108E-03  -.5863786E-02   .3575335E-02   .9706597E-02  -.8628883E-02
   .2495278E-02   .1363678E-01   .1007498E-01  -.1479156E-01  -.2587280E-01
  -.1696205E-01  -.3264349E-01  -.8452115E-02   .1504974E-01  -.9656661E-02
  -.1485863E-01   .6902880E-03  -.7238138E-02  -.6715864E-02   .2735727E-01
   .2414226E-01  -.5896707E-02   .1645764E-01   .2131389E-01  -.1771229E-01
  -.3991970E-01  -.7005294E-02   .1635273E-01   .2224827E-03   .1490949E-01
  -.2085882E-01  -.4622007E-01   .1543079E-01   .4401428E-01   .1194856E-01
  -.1235933E-02  -.1126047E-01  -.3266310E-01  -.1769254E-01   .3287862E-02
   .1270350E-01   .2001387E-01   .2542805E-01   .1418155E-01   .6918149E-02
   .1130723E-01   .3173173E-01   .1966515E-01  -.1484755E-01  -.3316435E-02
   .3227138E-01   .3547828E-01  -.1379790E-01  -.9298666E-02   .2426249E-02
  -.2104361E-03   .1042614E-01   .8108714E-02  -.9550534E-02  -.1689554E-01
  -.4262826E-02  -.2849094E-02  -.1096722E-02  -.2548899E-01  -.2007890E-01
   .1341893E-01   .2572422E-01   .2982259E-01   .2038760E-01  -.4923689E-02
  -.1586726E-01  -.2916397E-01  -.2446992E-01  -.1282258E-02  -.4698231E-02
  -.3897447E-03   .2647094E-01  -.7423653E-02  -.4846641E-01  -.1514096E-01
  -.6495439E-02  -.1434740E-01   .3064175E-01   .5423027E-01   .1402433E-02
  -.1002870E-01  -.3438483E-02  -.2929548E-01  -.7672501E-02   .2650464E-01
   .3312240E-01   .6307619E-02  -.9851222E-02  -.2997990E-01  -.3252276E-01
   .2419433E-01   .4773389E-01   .1268261E-01  -.1033335E-02   .2067940E-01
  -.1213298E-01  -.5052069E-01  -.1300203E-01   .1347002E-01  -.1629256E-01
  -.2256149E-01   .3129654E-01   .4449534E-01   .3415851E-02   .1298140E-01
   .2491743E-01  -.7732772E-02  -.3064504E-01   .1634890E-02   .1538040E-01
  -.7437009E-02  -.5044100E-02   .1352907E-01  -.7783841E-02  -.2478419E-01
   .5849456E-02   .1821388E-01   .2369191E-02   .2389579E-02  -.6867544E-03
  -.1689457E-01  -.5732722E-02  -.1316136E-02   .1009051E-01   .2235497E-01
   .8269780E-02  -.1395094E-01  -.8034953E-02   .3055469E-01   .2431839E-01
  -.1265254E-01   .1274544E-01   .4104838E-01   .1131685E-02  -.3269663E-01
  -.3163177E-01  -.4092297E-01  -.7442511E-02   .2947943E-01   .6629369E-02
   .2285347E-01   .3905411E-01  -.9164374E-02  -.5711867E-01  -.4894696E-02
   .2322362E-01  -.3641376E-01  -.1669310E-01   .2397835E-01   .1507781E-01
  -.1982967E-01  -.2822226E-01   .1846822E-01  -.1244699E-01  -.6300433E-01
  -.3496354E-01   .1284486E-01   .3069177E-01  -.1640063E-01  -.3065108E-01
   .3316417E-01   .5661088E-01   .2453958E-02  -.1482487E-01   .2047118E-01
   .3988073E-01   .1625750E-01  -.2028402E-01  -.4243131E-01  -.1089906E-01
   .6235887E-02  -.2647656E-01   .2408787E-02   .1480992E-01  -.2620023E-01
  -.3822708E-01  -.1989568E-01   .2156831E-01   .3502004E-01  -.4112294E-02
  -.4148207E-01  -.4952378E-01  -.3043757E-01   .2061339E-01   .2701080E-01
  -.7479514E-02   .1802045E-01   .1422398E-01  -.2979926E-01  -.2724113E-01
   .2581617E-01   .2687388E-01  -.7101340E-02   .1511320E-01   .2105977E-01
  -.1648341E-01  -.2212813E-01  -.4565804E-02  -.1905698E-01  -.2145402E-01
  -.1227508E-01   .1156126E-01   .2215903E-01  -.6375512E-02  -.2420209E-01
  -.1167245E-01   .2840331E-01   .3905411E-01   .2839303E-01   .1992087E-01
  -.1792525E-01  -.2346491E-01  -.3161852E-02   .6370006E-02   .3104070E-01
   .1390772E-01  -.3189558E-02  -.1033980E-01  -.1517158E-01   .1971747E-01
   .2050997E-01   .2488063E-01   .3038654E-01  -.2414658E-02  -.3302102E-02
   .4591999E-01   .4508151E-01   .2217226E-01   .1667034E-01   .2261588E-01
   .4866153E-01   .2460070E-01  -.9173580E-02   .6632541E-03   .2458323E-01
   .4522390E-01   .3163541E-01  -.2228489E-01  -.9935797E-02  -.1142402E-01
  -.1349671E-01   .2828244E-01   .3060493E-01  -.4267894E-02  -.2020952E-01
  -.1741069E-01  -.3113076E-01  -.3045659E-01  -.4818627E-01  -.1319829E-01
   .1904692E-01  -.9099004E-02  -.1283939E-01   .1250837E-02   .1218417E-01
  -.3352412E-01  -.5960557E-01  -.1311606E-01  -.7343348E-03   .1309069E-01
   .3510734E-01  -.8926108E-02  -.6641948E-01  -.4882351E-01   .1355760E-01
   .1495800E-01  -.2831657E-01  -.1266982E-01   .2696019E-01  -.2775368E-01
  -.9707898E-02   .3991403E-01   .1091742E-01  -.3552356E-02  -.4431263E-01
  -.8233421E-01  -.5866924E-01  -.3266235E-01  -.1906070E-01   .3160876E-01
   .3048874E-01  -.2653747E-01  -.2209134E-01   .2864136E-01   .2047213E-01
  -.1052471E-01  -.1980982E-01  -.1187938E-01   .3680664E-02  -.2342491E-02
   .4420526E-03   .5527005E-01   .8051296E-01  -.3140252E-01  -.7420381E-01
   .1829585E-01   .1915769E-01  -.3555516E-01  -.7899960E-02   .5283180E-01
   .3032238E-01  -.1892429E-01   .1719079E-01   .3817723E-01   .6586754E-02
  -.2068300E-01  -.3123598E-01  -.3695212E-01   .6369261E-02   .4888688E-01
   .1641614E-01   .7893983E-02   .3802778E-01   .1721565E-01  -.3395985E-01
  -.4777071E-01  -.3097035E-01   .1362705E-01   .6775649E-02  -.1324803E-01
  -.2059005E-01  -.2435595E-01  -.7459710E-02  -.8485891E-02  -.1298313E-01
  -.8127991E-02  -.1987029E-01  -.4518777E-01  -.3591501E-01   .1190252E-01
   .6214868E-01   .6614600E-01  -.3242618E-02   .9842007E-03   .5663942E-01
   .3762248E-01  -.3940039E-03  -.1966799E-01   .2022109E-01   .3909307E-01
   .1991599E-01  -.3169733E-02  -.3484283E-01  -.1889826E-01   .1575312E-01
  -.4640823E-02  -.5064492E-01  -.2228185E-01   .2252261E-01   .1828343E-01
   .1175842E-01  -.1873046E-01  -.1235858E-01   .2162061E-01   .3283443E-01
   .1827693E-01  -.8100337E-02   .3248438E-01   .3767612E-01  -.8540146E-02
  -.7965950E-02   .2099893E-01   .1882320E-01   .2239212E-01   .2161889E-01
  -.4289413E-01  -.4039417E-01  -.2446082E-01  -.2030030E-01   .9548914E-02
   .3982959E-01   .2796284E-01  -.3731008E-01  -.5425540E-01  -.1996205E-01
  -.1606163E-01  -.3977160E-01  -.4831564E-02   .8171332E-02   .2436826E-02
   .3098248E-01   .3596206E-01   .5583331E-02  -.2228721E-01  -.1470154E-01
  -.4838244E-03   .1509190E-02  -.4670035E-02  -.9412080E-02  -.1884817E-01
  -.3504371E-02  -.1742336E-01  -.3387806E-01   .2359785E-01   .2641911E-01
  -.1428814E-01  -.1143731E-01   .2851399E-01   .5196678E-01   .9665693E-04
  -.5561071E-01   .1636246E-01   .7326208E-01   .3524763E-01  -.3296187E-01
  -.3456844E-01   .2361841E-01   .4508425E-01   .3061650E-01   .1208100E-01
  -.4471630E-02  -.3162016E-02   .1344352E-01  -.1026269E-02   .4422505E-02
   .1061282E-01   .1846165E-01   .9740586E-02  -.2249581E-02  -.2108701E-01
  -.2969689E-01  -.1828520E-02   .6906693E-02   .6266066E-02   .4469780E-02
   .2093455E-01   .6149376E-01   .4407924E-01  -.8599863E-03   .1018787E-02
  -.1920074E-01  -.6324236E-01  -.6955214E-01  -.2049328E-01   .3544339E-03
   .2334007E-01   .5111766E-01  -.2090706E-02  -.6638647E-01  -.6927212E-01
  -.3570194E-01  -.3392109E-01  -.4473759E-02   .3489715E-01   .1207561E-01
  -.1848060E-01  -.3490573E-01  -.1507903E-01   .2875438E-01  -.9598707E-02
  -.5840373E-01   .7461680E-02   .4511185E-01   .3277591E-01   .3651414E-01
   .3139877E-01   .5229587E-02   .1147481E-02  -.7453226E-02  -.7334972E-02
   .2481842E-01   .5650669E-01   .4995109E-01   .9198962E-02   .1310243E-01
   .8446069E-02  -.2841986E-01  -.2485298E-01   .3732003E-01   .5598086E-01
   .3133577E-02  -.3317849E-01  -.5871731E-01  -.3064392E-01   .2791931E-01
  -.3214215E-02  -.4365932E-01  -.1607451E-01   .9129626E-02  -.3264046E-01
  -.7598338E-01  -.3572711E-01   .2609502E-01   .1702206E-01  -.2246323E-01
  -.1704506E-01   .1613242E-01  -.9883474E-03  -.3527265E-01  -.1819894E-01
  -.1207900E-01  -.2685683E-01  -.3810647E-01  -.2058906E-01   .3213467E-01
   .4481423E-01   .1268722E-01   .1632856E-01   .4065957E-01   .2356226E-01
   .9545360E-02   .3148243E-01   .3290629E-01  -.1209006E-01  -.4025844E-01
  -.1726057E-01   .3612515E-01   .4074160E-01  -.5192121E-02   .6712234E-02
   .3407775E-01   .1538665E-02  -.2863504E-01  -.1698262E-01  -.1945094E-03
   .4902366E-02   .2095200E-01   .6465897E-02   .4671653E-02   .1301315E-01
  -.2337032E-01  -.2732900E-01  -.7631642E-03  -.2379483E-01  -.3671829E-01
  -.2881030E-01  -.2023828E-01   .2256188E-01   .2723851E-01   .2268084E-03
   .8026686E-02   .3164880E-01   .1303170E-01  -.2833140E-01  -.1689829E-01
   .2548673E-01  -.2043136E-02  -.4321244E-01  -.2530538E-01  -.4364845E-02
   .6776552E-02  -.3569371E-02   .3014157E-01   .7254902E-01   .4962344E-01
   .2626028E-01   .2569208E-01   .3207925E-01  -.2060891E-01  -.3383735E-01
  -.7411252E-02  -.8394551E-03   .9003483E-02   .2187990E-01   .2517444E-01
   .1337094E-01   .2338931E-01   .4532537E-01   .3785381E-01   .2192511E-02
  -.1959373E-01  -.3171445E-01  -.2959087E-01  -.5662093E-01  -.6069385E-01
  -.4444123E-01  -.3545416E-02   .1423108E-01  -.2221664E-01  -.2487278E-01
  -.1125584E-01  -.1548890E-01  -.4602266E-01  -.5049236E-01  -.1173446E-01
   .3259162E-01   .2080648E-01  -.9154040E-02   .3929441E-02   .3271786E-01
   .4868692E-01   .5580748E-01   .4882348E-01   .4412530E-01   .2935564E-01
  -.1362823E-01  -.2254925E-03   .1458893E-01  -.9047591E-02  -.2477911E-01
   .8930814E-02   .4166765E-01   .1873086E-01   .2093808E-01   .3305970E-01
   .2574012E-01  -.9674335E-02  -.3172067E-01  -.2321080E-04   .1599175E-01
  -.3320392E-01  -.5782984E-01  -.6578386E-01  -.4818382E-01  -.4455879E-01
  -.6691215E-01  -.4235775E-01  -.8886505E-02  -.1455980E-01  -.2761790E-01
   .2656667E-02   .2698157E-01   .9723114E-02  -.2541900E-01  -.2295372E-01
   .1985155E-01   .2796865E-01  -.1290280E-01  -.6622719E-02   .1457079E-01
  -.3978989E-02  -.1271738E-01   .1819162E-01   .4047040E-01   .5497611E-02
   .5884137E-02   .4024584E-01   .1081573E-01  -.2264950E-01  -.1341754E-01
  -.1811265E-01  -.3999987E-02   .1379080E-01   .5814346E-02  -.1879729E-01
  -.1744278E-01   .1876105E-01   .2890387E-01   .2567246E-01  -.1224992E-02
  -.1214845E-02   .2697076E-01   .3495527E-01   .1608930E-01  -.6841372E-02
  -.1601685E-02  -.5678677E-02  -.9031470E-02   .3020686E-01   .6684419E-01
   .3464784E-01  -.1238441E-01  -.8809048E-03  -.9299015E-02  -.2504889E-01
  -.1987754E-01  -.3139951E-01  -.1591800E-01   .1451773E-01   .2244410E-01
  -.1009497E-01  -.5275040E-01  -.3908245E-01  -.1704948E-01  -.2392125E-02
  -.2081439E-01  -.2564210E-01  -.4258872E-02   .1510986E-01   .3006097E-01
   .2686730E-01   .5634321E-01   .3437644E-01  -.9611103E-02  -.1998353E-01
  -.3546106E-01  -.5241962E-01  -.1954303E-01   .9018960E-02  -.5529347E-02
  -.9911314E-02   .1450744E-01   .3011951E-01   .2898217E-01   .1350770E-01
   .9202235E-02  -.1820952E-02  -.4925508E-01  -.3480274E-01   .2051079E-01
  -.9174146E-03  -.2700702E-01   .1449265E-01   .2396841E-01  -.1058311E-01
   .1293090E-01   .4226707E-01   .3635511E-01  -.1584139E-01  -.8982000E-01
  -.6697611E-01  -.8586265E-02  -.1805191E-01  -.7050239E-01  -.3074487E-01
   .1049503E-02  -.1389360E-02   .1105970E-01   .1652073E-01   .3219401E-01
   .1746823E-01  -.1423232E-02   .1073819E-01   .5248776E-01   .4514474E-01
   .8091161E-02   .2181726E-01   .3547196E-01   .3033520E-01   .7212761E-01
   .5545363E-01   .1896004E-01   .2118869E-01   .2816545E-01   .1340499E-01
   .1474626E-01   .4326337E-01   .6938076E-02  -.2779500E-01  -.5168140E-01
  -.4891622E-01  -.2091726E-01  -.1104370E-01  -.5068577E-02  -.9307735E-02
  -.9000754E-02   .4525301E-01   .4191145E-01  -.2172987E-02  -.2101242E-01
  -.1625518E-01  -.1311056E-01  -.1870121E-01   .1480677E-01   .1707215E-01
   .6373335E-02   .3869186E-03   .9585243E-02   .4276107E-02  -.3593229E-02
  -.1373410E-01  -.4193408E-01  -.1445531E-01   .3064803E-01   .2646497E-01
  -.2235328E-01  -.2513587E-01   .9224832E-02   .1204306E-01   .7140903E-02
   .3383733E-01   .5828975E-01   .9012502E-02  -.4792189E-01  -.3006274E-01
   .5803483E-02  -.9440449E-02  -.7919661E-02   .1994706E-02   .1334115E-01
   .3608712E-01   .1094001E-01  -.1929362E-02  -.4533453E-02  -.3615144E-01
  -.3565881E-01  -.9395887E-02  -.4064668E-01  -.5099461E-01  -.1745806E-01
   .1078979E-01  -.1228876E-01  -.3450541E-01   .7656262E-02   .1322441E-01
  -.1921570E-01  -.4836120E-01  -.1774797E-01   .5755856E-02  -.2670465E-01
  -.5511678E-01  -.5008515E-01  -.3021048E-01  -.3506264E-01  -.1582751E-01
   .2700328E-01   .4972477E-01   .2970623E-01  -.3276520E-02   .1202141E-01
   .3788961E-01   .9853860E-02  -.4004966E-01  -.3319937E-01   .4045022E-03
  -.3407968E-01  -.6011929E-01  -.4779567E-01  -.4166754E-01  -.4885040E-01
  -.3328013E-01   .3027707E-01   .3152756E-01  -.1958772E-01  -.5171774E-01
  -.3001829E-01  -.3076903E-01  -.4026627E-01   .8102102E-02   .1132120E-01
   .7845758E-03   .1705661E-01   .5098791E-01   .4090417E-01   .7471607E-02
   .3127022E-01   .4502490E-01   .3275326E-01   .1526636E-01  -.7989660E-02
  -.7406241E-02   .1093334E-01   .1799218E-02  -.4313662E-02   .1754900E-01
   .1790088E-01   .2373526E-01   .5319590E-01   .7003506E-01   .2744494E-01
  -.2924362E-01   .2711952E-01   .6897316E-01   .2033955E-01  -.6292672E-02
   .4726370E-02  -.8372487E-02  -.1532788E-01   .3322206E-01   .5155858E-01
   .1919294E-01   .5078167E-02   .2340755E-01   .4220511E-01   .6067220E-01
   .5301912E-01   .1568813E-01  -.1849769E-02  -.3353265E-02  -.1430580E-02
   .6046005E-02   .5534970E-02   .2115727E-01   .1876638E-01  -.2098303E-01
  -.3618105E-01  -.6505181E-02   .3636540E-01   .4804541E-01  -.2382381E-02
  -.4303449E-01  -.1997129E-01   .4077480E-01   .3879191E-01  -.2470616E-01
  -.1177972E-01   .1153645E-01  -.1550784E-01  -.3152695E-01  -.3045698E-01
  -.3805293E-01  -.4171780E-01  -.3602723E-01  -.2104344E-01   .3236884E-01
   .3384579E-01  -.2035905E-01  -.3408928E-01  -.1072721E-01  -.1233064E-02
  -.1992661E-01  -.3045812E-01  -.3252690E-02   .2553141E-02  -.2139647E-01
  -.2066513E-01  -.2899548E-01  -.4166695E-01  -.3942092E-01  -.3073562E-01
  -.2541939E-01   .7524560E-02   .8382375E-02  -.4133033E-02   .2649450E-01
   .3564797E-01   .1064165E-01   .1642183E-02   .3042046E-01   .1984101E-01
  -.2441679E-01  -.4963732E-01  -.5841748E-01  -.5474344E-01  -.3190973E-01
   .1550598E-01   .5228514E-01   .5766870E-01   .5483207E-01   .5837555E-01
   .1699619E-01  -.2613553E-01  -.2166284E-01   .2517279E-02   .3903457E-02
   .1350981E-01   .3333147E-01   .7312291E-02   .8105851E-02   .3799899E-01
   .2889141E-01  -.2212185E-01  -.4054611E-01  -.1828665E-01  -.1390065E-01
  -.1322541E-01  -.1630989E-01  -.2208717E-01  -.3093159E-01  -.2265021E-01
  -.7338992E-02   .1599453E-01   .2022345E-01  -.4316729E-02  -.1197897E-01
  -.1899452E-01  -.2599070E-01  -.9919582E-02   .7289861E-02   .1860880E-01
   .4212185E-01   .4485341E-01   .3619565E-01   .4519557E-02  -.1793574E-01
  -.1150566E-01   .1063808E-02  -.2185907E-02  -.3511354E-01  -.3127834E-01
  -.3899493E-02  -.4782808E-02  -.9129233E-03   .1103128E-01  -.3445572E-02
  -.1418719E-01   .1306824E-01   .3412818E-01   .2121907E-01   .5027599E-02
   .1778576E-01   .3081729E-01   .2461876E-01   .2330807E-01   .1622009E-01
  -.2228637E-02  -.1824467E-01  -.5448761E-02  -.3921813E-02  -.2728388E-01
  -.2217877E-01   .6018113E-02   .1835298E-01   .7785791E-02   .8877202E-02
   .2465049E-01   .3493312E-01  -.3864089E-03  -.8704498E-02   .1680775E-01
   .4792163E-02  -.1096377E-01  -.8537176E-02   .4072159E-03   .5249167E-02
   .6028459E-02   .3274471E-02   .6545623E-02   .1255853E-01   .2860388E-02
  -.1113808E-01  -.1984581E-01  -.4604954E-02   .1746480E-01   .1903693E-02
  -.7792413E-02   .5191180E-02   .1316249E-01   .5852169E-02  -.1296172E-01
  -.1719470E-01  -.1634911E-01  -.2347379E-01  -.1460998E-01  -.1128068E-01
  -.1066459E-01  -.9102952E-02  -.1573191E-01  -.1051154E-01  -.9694503E-02
  -.1046459E-01  -.1649787E-01  -.2239243E-01  -.1238928E-01  -.1148350E-01
  -.1699556E-01  -.6928143E-02   .2151967E-01   .1813023E-01  -.7597209E-02
   .1823529E-02   .1035891E-01   .1789979E-01   .2766018E-01   .8516845E-02
  -.1238417E-02   .9579722E-02   .2371388E-01   .7292922E-02  -.1190040E-01
  -.1212682E-01  -.3500540E-01  -.3838056E-01  -.4189116E-02   .1575292E-01
   .6747366E-02   .5131708E-02   .3074597E-01   .4161307E-01   .1844379E-01
   .6269095E-02   .6619997E-02   .7425819E-02   .2603422E-03  -.4985495E-02
   .1614948E-02   .5305331E-02  -.1916852E-01  -.4525194E-01  -.3561088E-01
  -.1615639E-01  -.2182859E-01  -.2631963E-01  -.8838841E-02  -.3203317E-02
   .3261468E-02  -.1137767E-02   .5145458E-02   .1156434E-01   .4799729E-02
   .2488434E-02   .1016906E-01   .5873866E-02  -.1542269E-01  -.7845081E-02
   .9919266E-02   .2227472E-02   .1954139E-02   .1569051E-01   .9918353E-02
  -.5906919E-02  -.1045099E-01  -.5227543E-02   .1661884E-01   .2797045E-01
   .6512741E-02  -.4013629E-02  -.2488702E-02   .5670307E-02   .2046544E-01
   .2992188E-01   .2772075E-01   .2094594E-01   .1164765E-01   .1023294E-01
  -.5977886E-02  -.3726431E-01  -.2437454E-01  -.4339675E-02  -.7776024E-02
  -.1711103E-01  -.1447532E-01  -.1376741E-01  -.2455286E-01  -.1613987E-01
  -.3923296E-02  -.1085624E-02  -.2806459E-01  -.3916930E-01   .4590772E-02
   .2981132E-01   .9227757E-02  -.6444509E-02   .1056504E-01   .1850272E-01
   .6796210E-02  -.4365762E-03  -.9054522E-02  -.1101697E-01  -.6912454E-02
  -.3931980E-02   .4435114E-02   .1823779E-01   .1375798E-01   .1006256E-01
   .2706497E-01   .1991481E-01   .1295946E-01   .1052272E-01  -.8278050E-03
   .1316153E-01   .2203251E-01   .1766898E-01   .1400212E-01   .3249577E-01
   .3944099E-01   .5326109E-02  -.3667194E-02   .8312744E-02   .9921320E-02
   .6374818E-02   .5167175E-02  -.1975445E-01  -.2196271E-01  -.1267455E-01
  -.2583149E-01  -.2266639E-01  -.1273258E-01  -.1474602E-01  -.2315996E-01
  -.3335584E-01  -.3340884E-01  -.2455214E-01  -.6462402E-02   .1020546E-01
   .8456197E-02  -.2364943E-02   .5106597E-02  -.7013002E-02  -.1694674E-01
   .7914778E-02   .1538836E-01  -.9603640E-02  -.3045444E-01  -.9324080E-02
   .4837642E-02   .2826244E-02   .9874485E-02   .2619453E-01   .1778569E-01
   .6170990E-02   .2539832E-02   .4740014E-02   .1285722E-01  -.2524341E-02
  -.1190320E-01   .3898684E-02   .7052567E-02  -.1322499E-01  -.1010681E-01
   .4814817E-02  -.1448354E-01  -.3647980E-01  -.2723753E-01  -.1365721E-01
  -.8347046E-02  -.5555261E-02  -.9540356E-02  -.1346629E-01  -.7703247E-02
   .7270970E-03   .7791618E-03   .7909006E-02   .1350579E-01   .1432592E-01
   .2171688E-01   .2241971E-01   .1517061E-01   .7166719E-02   .1905078E-01
   .1435475E-01   .6769055E-02   .2191406E-01   .1419475E-01  -.4534243E-03
  -.5677818E-02  -.4076371E-02   .1852358E-03  -.2872677E-02  -.2282050E-02
  -.7846430E-03   .6534924E-02   .9769392E-02   .4470539E-02   .1526867E-02
  -.1704445E-02  -.3723997E-02  -.1330009E-02   .9298439E-02   .1378649E-01
   .7576775E-02  -.3830856E-02  -.8660508E-02  -.9056219E-02  -.2597695E-01
  -.3672056E-01  -.2618493E-01  -.3544022E-03   .3745027E-02  -.3176643E-02
   .6047266E-02   .1441030E-01   .1343013E-01   .9463396E-02   .2626998E-01
   .2972171E-01   .1096499E-01   .1785362E-03   .6058886E-02   .1427504E-01
   .5161388E-02   .2715479E-02   .2240867E-01   .1474036E-01  -.1308621E-01
  -.2435002E-01  -.1461101E-01  -.6990534E-02  -.1228836E-01  -.4122191E-02
  -.8024660E-02  -.2315121E-01  -.2140084E-01  -.1780120E-01  -.1133027E-01
  -.1999614E-01  -.2864773E-01  -.7202176E-02   .1208404E-01   .1530423E-01
   .2046038E-01   .2572465E-01   .1019623E-01  -.1498752E-01  -.2098404E-01
  -.2660712E-02   .9664609E-03  -.5205506E-02  -.6073472E-02  -.1115914E-01
  -.1652530E-01   .3355568E-02   .1454094E-01   .1072916E-02  -.1532149E-01
  -.1496954E-01  -.5625262E-02  -.1149021E-01  -.1506525E-01  -.5453739E-02
   .2298799E-01   .3485065E-01   .1574406E-01   .9170219E-02   .1565747E-01
  -.1105151E-02  -.1149380E-01   .1150179E-02   .5090494E-02  -.1643491E-02
   .6338064E-02   .2496944E-01   .3461563E-01   .2373739E-01   .2447287E-01
   .3624984E-01   .4474548E-01   .3866531E-01   .2363057E-01   .1970770E-01
   .7289261E-02   .6848677E-02   .1928355E-01   .1953555E-01   .2863706E-02
  -.1399582E-01  -.1200166E-01  -.1407934E-01  -.2654981E-01  -.3132437E-01
  -.2875289E-01  -.2208102E-01  -.1232364E-01  -.3262925E-02   .2324692E-02
  -.7598831E-02  -.3052327E-01  -.3505202E-01  -.1564850E-01  -.4785442E-02
  -.1452128E-01  -.1238535E-01  -.4289550E-02  -.5184033E-02  -.3958955E-02
  -.6968918E-02  -.1697404E-01  -.2379166E-01  -.2522674E-01  -.2391905E-01
  -.2721053E-01  -.2804993E-01  -.2782343E-01  -.2547432E-01  -.1236216E-01
  -.1052610E-01  -.2396454E-01  -.1294236E-01   .1036877E-01   .5072992E-02
  -.7766709E-02   .9945650E-02   .2743463E-01   .1099637E-01   .9614325E-02
   .2471854E-01   .1125256E-01  -.1365884E-01  -.1041824E-01  -.5652743E-02
  -.1697978E-01  -.1810275E-01  -.2509948E-02   .7139311E-02   .1178490E-02
   .1248627E-01   .3530067E-01   .2919909E-01   .1588610E-01   .2150024E-01
   .3666668E-01   .3920042E-01   .4080290E-01   .3851408E-01   .4494524E-01
   .5755862E-01   .5253007E-01   .4641523E-01   .4432939E-01   .4301059E-01
   .3717727E-01   .3986197E-01   .4004359E-01   .2883079E-01   .2087893E-01
   .1917559E-01   .1700611E-01  -.5392705E-05  -.1256561E-01  -.7751154E-02
  -.1630991E-01  -.2441273E-01  -.2166378E-01  -.2593956E-01  -.3784494E-01
  -.4233288E-01  -.3773466E-01  -.3449814E-01  -.4244898E-01  -.4471536E-01
  -.4054962E-01  -.4183068E-01  -.4497936E-01  -.4262208E-01  -.2825940E-01
  -.2351634E-01  -.1549603E-01  -.9874867E-03   .3804533E-02   .3267052E-02
   .1932951E-02   .3534410E-02   .6852530E-02   .9924830E-02   .5449128E-02
   .5004467E-02   .5494127E-02  -.2620934E-02  -.1508119E-01  -.1276268E-01
  -.3977356E-02  -.7295357E-02  -.6409937E-02  -.4345399E-02  -.2417540E-02
  -.6152719E-02  -.7236921E-02  -.4933702E-02  -.6289223E-02  -.9583765E-02
  -.1191951E-01  -.1392477E-01  -.1718565E-01  -.1321677E-01  -.1233441E-01
  -.1731909E-01  -.1095321E-01   .2324187E-02   .9740665E-02   .2090724E-02
  -.7558416E-02  -.2639918E-02  -.3844480E-02  -.9293261E-02  -.1689102E-02
   .4278976E-02   .8095875E-02   .1790221E-01   .2030029E-01   .1366117E-01
   .1510861E-01   .2550145E-01   .1758426E-01   .1463550E-01   .2047914E-01
   .1390938E-01   .4080717E-02   .3875755E-02   .7586573E-02   .1034151E-02
  -.2970311E-02   .2818247E-02  -.3387375E-02  -.9459378E-02   .1134400E-02
   .5895817E-02   .3399935E-02   .3244953E-02   .7857450E-02   .1423965E-01
   .2027300E-01   .1776488E-01   .1851158E-01   .1792820E-01   .1170625E-01
   .8921710E-02   .1230307E-01   .5364064E-02  -.6684119E-02  -.6756482E-02
  -.5863926E-02  -.6541149E-02  -.4516392E-02   .5326382E-04   .2697160E-02
  -.3184103E-02  -.1505787E-01  -.1811271E-01  -.1360017E-01  -.1357870E-01
  -.1722718E-01  -.1541663E-01  -.5902012E-02  -.5898896E-02  -.1152618E-01
  -.2625605E-02   .3655610E-02   .5279506E-02   .7009481E-02   .6813696E-02
   .3290671E-02  -.8943339E-03  -.3935919E-02  -.6038084E-02  -.6610249E-02
  -.2508775E-02   .3492959E-02   .4297794E-02   .2133408E-02   .3953823E-03
  -.4316963E-02  -.5774489E-02  -.7213655E-02  -.7413522E-02  -.1665768E-02
  -.1883995E-02   .2331719E-02  -.1784478E-03  -.6041354E-02  -.6208581E-02
  -.3669883E-03   .7866845E-03  -.4728402E-02   .2247701E-03   .4287483E-02
   .2895235E-02   .1943627E-02   .3343120E-02   .9543319E-03   .1074744E-02
   .1038842E-01   .1232443E-01  -.1932061E-02  -.6410829E-02  -.5292858E-02
  -.9910346E-02  -.1176160E-01  -.6373904E-02  -.8312874E-02  -.1605564E-01
  -.9111432E-02  -.5956522E-02  -.8012792E-02  -.7792421E-02  -.2770911E-02
   .9919979E-02   .1335131E-01   .1149496E-01   .7151847E-02   .7033577E-02
   .9845767E-02   .1380035E-01   .1991632E-01   .1363419E-01   .6039321E-02
   .7073650E-02   .8122259E-02   .5418287E-02   .1823855E-02   .2235983E-02
   .4880890E-02  -.3372902E-02  -.1215505E-01  -.8472807E-02  -.2557780E-02
  -.2046713E-02   .4972136E-03  -.2514800E-02  -.8705134E-02  -.3321527E-02
   .4310159E-02  -.2698215E-02  -.9016050E-02  -.1297633E-03   .1210722E-01
   .5730227E-02   .2314293E-02   .1142600E-01   .1358742E-01   .1603649E-01
   .1678419E-01   .1399658E-01   .7870500E-02   .5436824E-02   .5657187E-02
   .1215055E-01   .1572875E-01   .9757718E-02   .6238760E-02   .7237383E-02
   .7028326E-02   .3737848E-02   .1937591E-02  -.2192347E-02  -.6095845E-02
  -.7609484E-02  -.1040730E-01  -.1248194E-01  -.1200046E-01  -.1484724E-01
  -.1968200E-01  -.1850386E-01  -.1469514E-01  -.1267550E-01  -.1031212E-01
  -.8254738E-02  -.6733878E-02  -.9667360E-02  -.1158594E-01  -.8154622E-02
  -.2098843E-02   .3213355E-02  -.4781366E-02  -.1061879E-01  -.4296791E-02
  -.2555613E-02  -.1140306E-01  -.1384082E-01  -.8263422E-02  -.9542466E-02
  -.1369587E-01  -.9978952E-02   .5863462E-05   .4868239E-02   .6782815E-02
   .2505990E-02  -.3040749E-03   .3814720E-02   .3380234E-02   .8945290E-03
   .1068983E-02   .6239397E-02   .7599090E-02   .6253744E-02   .4528957E-02
   .4749310E-02   .9048644E-02   .8596816E-02   .3748787E-02   .5353279E-02
   .5315571E-02   .1380443E-02   .2637114E-02   .8846904E-02   .1054422E-01
   .8599106E-02   .8675636E-02   .7020205E-02   .9663055E-02   .6629605E-02
   .4124514E-02   .7024403E-02   .8469772E-02   .7697659E-02   .6357408E-02
   .8541256E-02   .1170532E-01   .1208071E-01   .1227250E-01   .9070744E-02
   .6653371E-02   .7281717E-02   .5045903E-02   .2126689E-02   .1538174E-02
   .1530393E-03  -.4029956E-02  -.6479970E-02  -.5053987E-02  -.7432603E-02
  -.1176962E-01  -.1533756E-01  -.1952463E-01  -.1976839E-01  -.1813535E-01
  -.1702964E-01  -.1874730E-01  -.1888804E-01  -.1288940E-01  -.8368740E-02
  -.4477419E-02   .2080152E-04   .2042462E-02  -.5993185E-03  -.4028539E-02
  -.2566860E-02  -.1190861E-02  -.1260202E-02  -.3003641E-03   .6030794E-02
   .9592652E-02   .9514129E-02   .9230587E-02   .1121654E-01   .1374208E-01
   .1157969E-01   .9861011E-02   .9139886E-02   .1012930E-01   .3125996E-02
  -.2782849E-02   .1870405E-02   .2200898E-02  -.2919488E-02  -.1061035E-02
   .7475358E-02   .4173630E-02  -.6183176E-03  -.1079346E-02   .8448564E-04
   .2079617E-02   .2844275E-03  -.4183421E-03   .2337708E-02   .6443218E-02
   .6809407E-02   .3562756E-02   .1673725E-02   .4062573E-02  -.6559389E-03
  -.2191031E-02   .1845116E-02  -.1516797E-02  -.3812810E-02  -.3613904E-02
  -.4198358E-02  -.7786713E-02  -.1406889E-01  -.1030916E-01  -.3826039E-02
  -.1133425E-01  -.1706053E-01  -.1402603E-01  -.1145358E-01  -.1155456E-01
  -.1103742E-01  -.1072938E-01  -.7719357E-02  -.1663616E-02  -.6385156E-03
   .2066525E-02   .4642024E-02   .7732624E-02   .4808283E-02   .5088782E-02
   .1047438E-01   .8441518E-02   .8271176E-02   .8011073E-02   .8222209E-02
   .4602225E-02   .2498981E-02   .4087117E-02   .2637692E-02   .4516527E-02
   .4762341E-02   .2471415E-02   .5085669E-02   .1288202E-02  -.2387885E-02
  -.2632332E-03  -.1534161E-02  -.6325110E-02  -.7179879E-02  -.8898589E-02
  -.9272938E-02  -.9137289E-02  -.8950639E-02  -.6552630E-02  -.9710562E-02
  -.1187501E-01  -.1272673E-01  -.9333198E-02  -.7614511E-02  -.6342585E-02
  -.1381319E-02   .8565462E-03   .9299712E-03   .2771056E-02   .1718400E-02
   .4719437E-03   .1212447E-02   .1135930E-02  -.1168268E-02  -.3584058E-03
   .3069796E-02   .1132797E-02   .4117297E-02   .9725237E-02   .6796797E-02
   .2083356E-02   .1326495E-02   .2846274E-02   .4252831E-02   .3847869E-02
   .4731166E-02   .6612022E-02   .6942478E-02   .6707854E-02   .8267410E-02
   .1333207E-01   .1386714E-01   .8468702E-02   .1006286E-01   .1528351E-01
   .1204603E-01   .2842667E-02  -.1227392E-02  -.4541861E-02  -.8297509E-02
  -.9099106E-02  -.8247058E-02  -.6399332E-02  -.7916620E-02  -.6301220E-02
  -.1797223E-02   .1145150E-02   .1509029E-02   .1446433E-02   .4065847E-02
   .1612381E-02   .2601541E-02   .6426949E-02   .2548344E-02  -.1834330E-02
  -.4141987E-02  -.1980023E-02  -.2134404E-03  -.4062879E-03  -.1036036E-02
  -.9982018E-03  -.3722602E-02  -.4387098E-02   .9284515E-03   .3871256E-03
  -.2256320E-03   .2027830E-02   .2011941E-02  -.4087049E-03  -.7510721E-03
   .2255630E-02   .4597157E-02   .6921407E-02   .5832603E-02   .4537344E-02
   .7712353E-02   .9925930E-02   .9209505E-02   .2576045E-02   .2917023E-03
   .5181355E-02   .3750522E-02   .1819507E-02   .3987228E-03  -.4869223E-02
  -.7573368E-02  -.4928065E-02  -.1982743E-02  -.3293299E-02  -.5002205E-02
  -.2732388E-02  -.3795971E-02  -.4853667E-02  -.5076101E-02  -.4166904E-02
  -.3712951E-02  -.2326953E-02   .1666489E-02   .1841000E-02   .1952522E-02
   .1911086E-02   .2576498E-02   .1265925E-02  -.9403363E-03  -.2248109E-02
  -.2420691E-02  -.5250335E-02  -.7077769E-02  -.1932280E-02  -.2591746E-02
  -.6235703E-02  -.6012755E-02  -.4593142E-02  -.9070917E-03  -.6464511E-03
  -.2441401E-02  -.2696616E-02  -.9469272E-04   .1708047E-02  -.4051499E-03
  -.1410469E-02  -.2698003E-02  -.2232436E-02  -.2041872E-02  -.3538268E-02
  -.1717970E-02  -.1639045E-02  -.2664763E-02  -.1383923E-02   .1391675E-02
   .3464271E-02   .2815512E-02   .2262784E-02   .2324259E-02   .3071295E-02
   .3037407E-02   .2463875E-02   .2232131E-02   .3469093E-02   .3350498E-02
   .1812421E-02   .2774802E-02   .3261590E-02   .1030381E-02  -.1126502E-02
   .1026574E-02   .2500060E-02  -.6679853E-03  -.6331699E-03  -.4038688E-03
  -.2403972E-02  -.3160490E-02  -.4407478E-02  -.5824856E-02  -.5484604E-02
  -.4324416E-02  -.5341315E-02  -.4485216E-02  -.2842879E-02  -.2361197E-02
  -.2543433E-02  -.1573449E-02   .5692818E-03   .1699390E-02   .2424661E-02
   .2795513E-02   .7721755E-03   .2244615E-03   .3610604E-02   .4126584E-02
   .2726384E-02   .3424344E-02   .3387250E-02   .1485868E-02   .2198558E-02
   .3976653E-02   .3762464E-02   .8807756E-03  -.4270678E-03   .1644529E-02
   .2078931E-02   .4071070E-03  -.4150584E-03   .8798293E-03   .1795614E-02
   .1849186E-02   .1703186E-02   .1727447E-02   .2146471E-02   .1009875E-02
   .7004996E-03   .1859921E-02   .1484412E-02   .3687282E-03  -.3916593E-03
   .2005820E-03  -.1088814E-03  -.2155081E-02  -.3058054E-02  -.2490500E-02
  -.1610492E-02  -.2095268E-02  -.2504727E-02  -.2167068E-02  -.1584921E-02
  -.1952752E-02  -.2486058E-02  -.2221236E-02  -.2029672E-02  -.2321519E-02
  -.2368140E-02  -.1537076E-02  -.1060416E-02  -.9879688E-03  -.8401463E-03
  -.9542967E-03  -.1005587E-02  -.5352490E-03  -.5134052E-03  -.1201678E-03
   .5948114E-03   .7476411E-03   .6218336E-03   .7701677E-03   .1137587E-02
   .1157681E-02   .1373323E-02   .1363361E-02   .1202870E-02   .1014096E-02
   .8313485E-03   .8055028E-03   .7291384E-03   .8332962E-03   .7743205E-03
   .5984938E-03   .4219433E-03   .2701078E-03   .1865906E-03   .1450071E-03
   .1658804E-03   .8325338E-04   .5356958E-05   .5264819E-04   .6212537E-04
  -.8276126E-04  -.1019287E-03   .7628921E-04   .8852696E-04   .2805609E-04
   .1274875E-04  -.7903605E-05  -.2519217E-04  -.9733757E-05  -.8893212E-04
  -.1855384E-03  -.1538886E-03  -.1770556E-03  -.2064121E-03  -.1655733E-03
  -.1359158E-03  -.1317870E-03  -.1017660E-03  -.2837393E-04   .2258051E-04
   .6361144E-04   .9415175E-04   .1004226E-03   .1033752E-03   .9782067E-04
   .9568861E-04   .9211930E-04   .8557968E-04   .7922002E-04   .7271464E-04
   .6366226E-04   .5490032E-04   .4751677E-04   .4002487E-04   .3410281E-04
