# Supplementary material for: Earthquake Response Analysis of Tall Reinforced Concrete Chimneys considering Eccentricity
Source: Hindawi journal article supplement (doi:10.1155/2020/1417969), 2020-03-11
Supplement: f1 [file 1417969.f1.zip › 1417969.f1/Four kinds of earthquake records/Rock/LANDERS ABY000.txt]

PEER STRONG MOTION DATABASE RECORD. PROCESSING BY CDMG.
LANDERS 06/28/92 1158, AMBOY, 000 (CDMG STATION 21081)
ACCELERATION TIME HISTORY IN UNITS OF G. FILTER POINTS: HP=0.1 Hz LP=23.0 Hz
NPTS=  2500, DT= .02000 SEC
   .1942245E-02   .2579760E-02   .5629224E-04   .1155861E-02   .1968806E-02
   .3102888E-03  -.1109552E-02  -.2433516E-02   .2087116E-02   .2647086E-02
  -.6352876E-03  -.2777304E-02  -.1106564E-02   .1724932E-02   .2101286E-02
  -.1651323E-02  -.1282116E-02   .3626088E-02   .4508349E-02   .3114987E-02
  -.2690898E-02  -.5098146E-02   .8871627E-03   .1889768E-02  -.1701709E-02
  -.2540210E-02   .9532263E-03   .5349359E-02   .6460694E-03  -.6975442E-02
  -.5211939E-02   .3146881E-02   .1092390E-03  -.6691062E-03  -.1683746E-03
  -.1007926E-02   .2727220E-02   .2917862E-02   .2203762E-02  -.3147216E-03
   .6735519E-03   .2057582E-02  -.1604330E-02  -.6399465E-02  -.3689444E-02
   .2142794E-02   .1112470E-02   .7359625E-03   .2857432E-02   .4145559E-02
   .4750282E-02   .5650831E-03  -.4377191E-03   .1684756E-02   .2806608E-02
   .6879165E-03  -.4486697E-02  -.1872594E-02   .3581186E-02   .5660802E-02
   .3503337E-02   .1532529E-02   .6857574E-03  -.6003690E-04  -.8027742E-03
   .4026858E-03   .1331723E-02   .1503917E-02   .2833808E-02   .3464997E-02
   .4289982E-02   .6048265E-02   .6345905E-02   .2639022E-02   .9884560E-03
   .1296287E-02   .8034160E-03  -.1163358E-02   .5164504E-02   .5408065E-02
   .3254622E-02   .7329566E-03  -.1034932E-02   .2072777E-02  -.1137397E-02
   .5208868E-03  -.1770272E-02  -.2362115E-02   .3818840E-02   .1042153E-02
  -.1650898E-02   .4421929E-02   .3130353E-02   .4974746E-03   .2512733E-02
   .5284829E-02   .2870222E-02  -.5727627E-02  -.5518799E-02   .3724458E-03
   .2568228E-02   .2900468E-02   .7993045E-02   .5749779E-02  -.8701869E-02
  -.8179921E-02   .1626066E-02   .2028670E-02   .3313571E-02   .3448929E-02
  -.3861715E-02  -.6489542E-02  -.3178317E-03   .3015216E-02   .1363521E-02
   .8623839E-03   .2306384E-02   .2986401E-02  -.2090464E-02  -.5502692E-02
  -.7732826E-03  -.8592956E-03  -.4547951E-02  -.3297769E-02  -.1655910E-02
  -.7622233E-02  -.7188059E-02  -.4196748E-02  -.6496179E-02  -.4729893E-02
   .2799910E-03   .2619512E-02  -.4147529E-02  -.4450832E-02  -.3644379E-02
  -.7900187E-02  -.9088859E-02  -.2523493E-02   .7925011E-02   .2349312E-02
  -.8212149E-02  -.9152974E-02   .2472601E-02   .4735592E-02  -.3371759E-02
  -.2572473E-02  -.2070009E-02  -.2353968E-02   .7982311E-02   .9605747E-02
   .2146082E-02   .3670573E-02   .3503902E-02  -.2162611E-02  -.5571866E-02
  -.3001885E-02  -.1242805E-02  -.6257547E-02  -.9638253E-02   .1526239E-02
   .5760848E-02  -.3120724E-02  -.9134059E-02  -.1041816E-02  -.2668136E-02
  -.7633938E-02  -.6561342E-02  -.2627649E-02   .1595722E-02  -.4362549E-02
  -.4811803E-02   .1538260E-02   .1225596E-01   .9342381E-02   .1436918E-02
   .5752072E-02   .1233570E-01   .7173014E-02  -.4564598E-02  -.1828412E-02
   .4957170E-02   .9717032E-02   .1046625E-01   .4063226E-02  -.9291404E-03
  -.2789089E-02  -.2483579E-02  -.6043872E-02  -.1387083E-01  -.8866186E-02
  -.5162045E-02  -.6818007E-02   .2893929E-02   .4978302E-02   .2298254E-02
   .6120703E-02   .4732990E-02   .4936474E-02   .7933737E-02   .1000076E-01
   .5397995E-02  -.1002187E-01  -.1010501E-01   .1693816E-02   .2014586E-02
  -.1347867E-02   .4656338E-02   .1290760E-01   .9831762E-02  -.4913900E-02
  -.2074764E-02   .1055070E-02  -.4957358E-02  -.1034988E-02  -.4871760E-02
  -.8882955E-02  -.4090531E-02   .7224790E-02  -.2499431E-02  -.1679937E-01
  -.6447958E-02   .4211494E-02   .9763806E-02   .1590994E-02  -.8663639E-02
  -.1283703E-01  -.1316503E-01  -.6284692E-02  -.8537738E-03   .3847842E-02
   .9186957E-02   .1954855E-01   .1368194E-01  -.7332931E-03  -.6818671E-03
   .9799058E-02   .1830016E-01   .3599319E-02  -.4882583E-02   .3458372E-02
   .1381689E-01   .9601638E-02   .1767428E-02  -.1228924E-02  -.1012496E-01
   .1886653E-03   .7072027E-02   .8891870E-03  -.9401195E-02  -.1183044E-01
  -.1465825E-02  -.5438333E-02  -.1424972E-01  -.1439825E-01  -.8775629E-02
  -.3187685E-02   .2895977E-02  -.5400226E-03  -.3582304E-02  -.3218808E-02
   .2449706E-02   .3267099E-02   .2955350E-02   .9407219E-02   .8645645E-02
   .1634530E-02  -.4249487E-02   .2146274E-02   .1019534E-02  -.6093589E-02
  -.2888393E-02   .1738680E-02   .1366732E-02   .1699602E-02   .4782389E-02
   .3848416E-02   .3008280E-02   .6414402E-02   .4886783E-02  -.7279782E-03
  -.3743781E-02  -.9833263E-03   .1300787E-02   .1838658E-02  -.1957452E-02
  -.3109724E-02  -.4674078E-02  -.8655835E-02  -.4921291E-02   .6563890E-03
   .1868468E-02   .2181925E-02  -.2208799E-03  -.1161499E-01  -.1554065E-01
  -.5774865E-02   .3301403E-02   .3825989E-02  -.2815946E-02  -.5755283E-02
  -.2938762E-02   .5444917E-02   .6266315E-02   .1167631E-02  -.5515115E-02
  -.7282482E-02   .3223808E-02   .7358157E-02   .5312324E-02   .2002710E-02
   .4635614E-02   .2777456E-02  -.2288603E-02  -.3013545E-02   .2551852E-02
   .9547288E-02   .5677681E-02  -.1537526E-02  -.3751676E-02  -.3200607E-02
  -.3392100E-02  -.2436095E-02  -.1444391E-02   .2881691E-02   .5256511E-02
   .2651690E-02  -.2969273E-02   .5489624E-03   .4417056E-02  -.3284711E-02
  -.2097181E-02   .1881068E-02   .6236715E-02   .7247781E-02  -.1038454E-02
  -.1073841E-01  -.1485183E-01  -.8229752E-02   .3453566E-02   .9839002E-02
   .1226357E-02  -.7063970E-02  -.8308139E-02  -.7134908E-02  -.3286220E-02
  -.4818033E-02  -.5533848E-02  -.6121144E-02  -.3576022E-02  -.1358322E-02
  -.5588043E-02  -.3547825E-02  -.3637369E-02  -.8575995E-02  -.1377370E-01
  -.1091035E-01  -.3337660E-02   .2678508E-02   .5896815E-02  -.9736998E-03
  -.2363756E-02   .3490226E-02   .8294628E-02   .8700787E-02   .4291524E-02
   .7383341E-02   .6083036E-02   .4212549E-02   .4862481E-02   .9290493E-02
   .1427542E-01   .7246788E-02   .5099875E-02   .2169600E-02   .9131433E-03
   .4253825E-02   .6169565E-02   .3560585E-02  -.2555158E-02  -.6158641E-02
  -.5107268E-03   .7289386E-02   .3439058E-02  -.5836510E-03  -.3325242E-02
  -.2339754E-02  -.1160468E-02  -.1311776E-01  -.1350826E-01   .3503463E-02
   .1165750E-01   .5310203E-02  -.2279459E-02  -.2996362E-02  -.5741027E-02
  -.3693733E-02   .8392997E-03  -.6359709E-02  -.7196979E-02   .2236694E-03
   .6746566E-03  -.9562937E-02  -.1633049E-01  -.8536529E-02  -.1211149E-01
  -.1789271E-01  -.5680108E-02   .3656090E-02   .2462827E-02   .2750620E-03
   .7562076E-02   .6831889E-02  -.5135640E-02  -.7262209E-02  -.1688801E-02
   .1671207E-02  -.1128567E-02  -.3292882E-02  -.6800538E-02  -.5940555E-02
  -.5756834E-02  -.5318114E-02   .1124843E-03   .5191182E-02   .5542178E-02
  -.7774827E-02  -.2393355E-01  -.2376922E-01  -.7879549E-02   .1384200E-02
  -.3303107E-03  -.6769463E-02  -.1113088E-01  -.1077785E-01  -.2505548E-02
   .1686755E-02  -.1567963E-02  -.5356143E-02  -.5666124E-02  -.1170749E-01
  -.1894021E-01  -.1813294E-02   .7464721E-02  -.2503646E-02  -.3845874E-02
   .3076957E-02   .1186333E-01   .1141767E-01   .1197363E-02  -.3545551E-02
  -.3405726E-02  -.1233676E-01  -.1736936E-01   .8897422E-03   .2087468E-01
   .2578402E-01   .1674384E-01   .9445749E-04  -.5179886E-02   .5291283E-03
  -.4343338E-02  -.9111765E-02  -.1142607E-01  -.7353143E-02   .2281846E-02
   .4298454E-02   .1888261E-02  -.3682912E-02  -.5130227E-02  -.8980663E-02
  -.1088596E-01  -.7902399E-02  -.5789918E-02  -.8385758E-02  -.1249120E-01
  -.1487386E-01  -.1040927E-01  -.4374891E-02   .3908583E-02   .6082256E-02
  -.3323111E-02   .2321620E-02   .1357839E-01   .1022876E-01  -.3331073E-02
  -.1389823E-01  -.1136756E-01   .1101985E-02   .7052495E-03  -.9273367E-02
  -.1063809E-01  -.6012344E-02   .1225487E-01   .3313533E-01   .3706543E-01
   .2628509E-01   .1641458E-01   .2050584E-01   .2842719E-01   .2440537E-01
   .1074352E-01   .5036650E-02  -.2432779E-02  -.1554689E-01  -.2338250E-01
  -.1578653E-01  -.1685343E-01  -.1289376E-01   .8352861E-02   .7811265E-02
  -.3926872E-02  -.4433791E-02   .1926593E-01   .2907631E-01   .5576548E-02
  -.1988671E-01  -.1744176E-01  -.1218058E-01  -.1220607E-01   .6415069E-02
   .2185686E-01   .2230669E-01   .2427327E-01   .2876434E-01   .9472067E-02
  -.1460808E-01  -.8980736E-02   .1712923E-01   .3316262E-01   .2496488E-01
   .3026726E-02   .5059590E-02   .2645103E-01   .3839523E-01   .2733741E-01
  -.9283644E-02  -.3428078E-01  -.3782529E-01  -.1690407E-01   .5061628E-02
   .1030952E-01   .6715039E-02  -.1621427E-02  -.4245893E-02   .4990199E-02
  -.2250692E-03  -.3167882E-01  -.5644443E-01  -.5813152E-01  -.3911771E-01
  -.4749842E-02   .4353592E-01   .5672348E-01   .2697007E-01  -.1436748E-01
  -.2699816E-01  -.3702393E-02   .4616709E-02   .3149930E-02   .8079571E-02
  -.2230609E-02  -.1584763E-01  -.2133627E-01  -.2738081E-01  -.1753682E-01
   .1907583E-03   .1549373E-02   .4134028E-02  -.4090783E-03  -.3001945E-02
   .1054057E-01   .1511498E-02  -.7800111E-02  -.3835401E-02  -.2367651E-02
  -.1436390E-01  -.3875723E-01  -.5130429E-01  -.3246288E-01  -.1809358E-03
   .1662863E-01   .8481735E-03  -.1334210E-01   .1024560E-02  -.1155218E-02
  -.1892978E-01  -.2874833E-01  -.8856336E-02   .2491072E-01   .4530966E-01
   .4362764E-01   .4028506E-01   .5237201E-01   .4970671E-01   .2644251E-01
   .1071712E-01   .5553833E-02  -.3088672E-02  -.1260022E-01  -.1866927E-01
  -.1313888E-01   .1232875E-02   .2789345E-02  -.9675106E-02  -.1238020E-01
  -.1319319E-01   .4071279E-02   .4675822E-01   .8014787E-01   .6890742E-01
   .4739148E-01   .3798193E-01   .1823263E-01   .1116703E-01   .2878340E-01
   .5096732E-01   .7011470E-01   .6779108E-01   .5030516E-01   .5912096E-01
   .6735842E-01   .4062110E-01   .9089776E-02  -.1367261E-01  -.4598627E-01
  -.7036433E-01  -.4181256E-01  -.7452903E-02  -.5964788E-02  -.1727767E-01
  -.4252580E-01  -.4856427E-01  -.4391518E-01  -.3095308E-01  -.1369577E-01
  -.1123458E-01  -.2635513E-01  -.1998836E-01   .1707836E-01   .7695124E-03
  -.3615354E-01  -.4824775E-01  -.3573956E-01   .2347403E-03   .3346728E-01
   .3786749E-01   .3076236E-02  -.2210254E-01  -.2910390E-01   .1266911E-01
   .7456569E-01   .9169039E-01   .8675454E-01   .5343615E-01   .1137637E-01
  -.3769685E-02   .3224374E-02   .2525594E-02  -.1240729E-01  -.2655987E-01
  -.4531265E-01  -.3676615E-01  -.7566699E-02  -.5649181E-02   .5392234E-02
   .3678877E-01   .4168774E-01   .3052886E-01   .9413753E-02  -.3181779E-01
  -.6204456E-01  -.5400501E-01  -.3477299E-01  -.3132956E-01  -.2967419E-01
  -.3683366E-01  -.2812805E-01  -.7122261E-02  -.2516819E-01  -.5598145E-01
  -.6099893E-01  -.2344058E-01   .2486754E-01   .1855161E-01  -.2057466E-01
  -.3749452E-01  -.2516077E-01  -.3779243E-03   .1622248E-01   .2867659E-01
   .3907641E-01   .2711069E-01   .2325602E-01   .3179128E-01   .2072724E-01
   .1252288E-02  -.4279269E-02   .1584421E-01   .2239047E-01   .1192735E-02
  -.2869030E-01  -.2716346E-01  -.8030404E-02  -.2447086E-01  -.2534510E-01
  -.2124480E-01  -.1781465E-01  -.1480983E-01  -.3276499E-01  -.3703787E-01
  -.3581976E-02   .1896196E-01   .8011137E-02   .5550794E-02   .1213071E-01
   .1668898E-01  -.2806379E-02  -.3766804E-01  -.5134941E-01  -.2664817E-01
   .1481383E-03  -.3843228E-02  -.3309693E-01  -.3461582E-01   .4036971E-02
   .3408300E-01   .3120955E-01   .5564607E-02  -.6928461E-02   .7366729E-02
   .2464236E-01   .1984315E-01  -.1952692E-01  -.3972303E-01  -.7194319E-02
   .1425515E-01   .1529544E-01   .1790347E-01   .2116634E-01   .3034826E-01
   .4320831E-01   .4393240E-01   .5171183E-01   .5432699E-01   .1931028E-01
  -.1590227E-01  -.2101258E-01   .3991582E-02   .4089609E-01   .5229447E-01
   .3961984E-01   .1052320E-01  -.5148190E-02   .1409603E-01   .3375030E-01
   .3183666E-01   .3839587E-02  -.2910143E-01  -.3646084E-01  -.5507022E-02
   .3704522E-01   .3936356E-01   .1549953E-01  -.5750250E-02   .1115409E-01
   .4898169E-01   .7100031E-01   .6561970E-01   .3705550E-01   .1548340E-01
  -.1660879E-02  -.5065758E-02  -.4881257E-02  -.2275688E-01  -.4039994E-01
  -.5327960E-01  -.4528700E-01  -.2084282E-01  -.3528438E-02   .3509441E-02
  -.1065794E-03   .4357839E-02   .2884996E-01   .3572566E-01  -.2384724E-02
  -.2519001E-01  -.3070119E-01  -.2428347E-01  -.9111093E-02   .2236285E-02
   .1941806E-01   .4096748E-01   .4996682E-01   .2632615E-01  -.1331831E-01
  -.3426413E-01  -.1968743E-01   .2507004E-01   .4010676E-01   .2130497E-01
   .1857125E-01   .8249745E-02  -.2472086E-01  -.2288123E-02   .4773153E-01
   .5132385E-01   .3775364E-01  -.1175830E-01  -.7001368E-01  -.8671631E-01
  -.8562096E-01  -.7206120E-01  -.6224689E-01  -.6176455E-01  -.5451452E-01
  -.4669838E-01  -.2660247E-01  -.6011856E-02   .1130966E-01   .2166049E-01
   .2030274E-01   .8552220E-02  -.2357689E-01  -.4327933E-01  -.3056312E-01
  -.9939867E-02   .5209046E-02   .2502446E-01   .4109443E-01   .4704294E-01
   .3080544E-01  -.8599328E-02  -.3511537E-01  -.5503712E-01  -.5703033E-01
  -.4937128E-01  -.3758530E-01  -.1339919E-01   .1223022E-01   .3473231E-01
   .4235872E-01   .2390170E-01   .9335971E-02   .1399112E-01   .2076685E-01
   .1535257E-01  -.2532312E-01  -.7285831E-01  -.8236076E-01  -.4940366E-01
  -.3363033E-02   .4333040E-01   .7589479E-01   .9100392E-01   .7195937E-01
   .3206399E-01   .7589978E-02  -.3725009E-02  -.1923730E-01  -.5182744E-01
  -.6004163E-01  -.5728674E-01  -.5576197E-01  -.6344882E-01  -.7738826E-01
  -.6354291E-01  -.1986868E-01   .2440633E-01   .3729594E-01   .2072999E-01
   .1434523E-02  -.1908145E-02  -.1502139E-01  -.8735261E-02   .9762310E-02
   .2141262E-01   .2497229E-01   .1738606E-02  -.2315462E-01  -.2086485E-01
   .1626200E-01   .5322769E-01   .5116308E-01   .1819248E-01  -.1218121E-01
  -.2364716E-01  -.3359535E-01  -.4730427E-01  -.2505106E-01  -.4022870E-02
  -.9830878E-02  -.9317946E-02   .7105670E-03   .8172760E-02   .7020032E-02
   .1280228E-01   .2626514E-01   .4405381E-01   .5701584E-01   .5424947E-01
   .3432467E-01  -.1475990E-01  -.3736935E-01  -.3161973E-01  -.3153520E-01
  -.1313861E-01  -.3024719E-01  -.7327704E-01  -.9599766E-01  -.9933524E-01
  -.6742262E-01  -.5214009E-01  -.7332969E-01  -.7490980E-01  -.5340016E-01
  -.1830311E-01   .1228248E-01   .2938571E-01   .4851161E-01   .5087687E-01
   .4534120E-01   .5693949E-01   .5161293E-01   .4398932E-01   .5954623E-01
   .6169117E-01   .5015586E-01   .4306062E-01   .4715477E-01   .4886825E-01
   .3540719E-01   .3150964E-01   .3415438E-01   .2374413E-01  -.1552701E-01
  -.5318961E-01  -.5288373E-01  -.3543472E-01  -.1392713E-01  -.1190255E-01
  -.2879999E-01  -.3437850E-01  -.2218452E-01  -.1742124E-01  -.3334765E-01
  -.2524081E-01  -.1364863E-01  -.1521853E-01  -.2000960E-01  -.4546586E-01
  -.6608732E-01  -.5579360E-01  -.7494685E-02   .5020659E-01   .5234745E-01
   .1429623E-01  -.2582710E-03   .5154748E-02   .9953727E-02   .8103260E-03
   .5280865E-02   .1716170E-01   .2306432E-01   .2741042E-01   .1873112E-01
  -.1421136E-02  -.2181207E-01  -.8004455E-02   .3121442E-01   .2418855E-01
  -.2920347E-01  -.4150887E-01  -.9374701E-03   .5508489E-01   .8136610E-01
   .4648401E-01   .1373377E-02  -.1288941E-02  -.5164038E-02  -.2418716E-01
  -.2833765E-01  -.2985655E-01  -.4985377E-01  -.6916963E-01  -.4269768E-01
   .1579920E-01   .4658779E-01   .3888769E-01   .1860283E-01   .1085990E-01
  -.5848835E-02  -.2183337E-01  -.3463652E-01  -.3882680E-01  -.2836273E-01
  -.2091175E-01   .1211936E-02   .3072654E-01   .5091325E-01   .4780519E-01
   .2689712E-01   .5259749E-02  -.6721284E-02   .1856542E-01   .5624513E-01
   .6919494E-01   .6027084E-01   .1301515E-01  -.1082032E-01  -.7667608E-02
  -.1328078E-01  -.1752715E-01  -.1751196E-01   .1662733E-01   .4257806E-01
   .3984333E-01   .2715748E-01   .2627507E-01   .4691670E-01   .4782643E-01
   .1882874E-01  -.7614867E-02  -.2592805E-01  -.4295706E-01  -.4144655E-01
  -.1984204E-01   .6008733E-02   .3031522E-01   .1883502E-01  -.9490488E-02
  -.7463854E-02  -.2240003E-03   .1960877E-01   .4600219E-01   .5761172E-01
   .3957700E-01   .1351793E-01  -.5024752E-02  -.2008618E-01  -.3911744E-01
  -.5739492E-01  -.3271613E-01   .1352955E-01   .2858668E-01   .2739012E-01
   .4126406E-01   .4528276E-01   .3889133E-01   .2648701E-01  -.5206528E-02
  -.2689489E-01  -.2968673E-01   .5322629E-02   .5178965E-01   .5335831E-01
   .4421901E-01   .4181885E-01   .2351995E-01   .8720670E-02  -.5125929E-02
  -.2406233E-01  -.1809644E-01   .1482356E-02   .1686590E-01   .2789608E-01
   .4657218E-01   .3908427E-01  -.2354349E-02  -.2688748E-01  -.2250668E-01
  -.1100934E-01  -.2119821E-01  -.5728591E-01  -.7221982E-01  -.4251140E-01
  -.1776527E-01  -.2484518E-01  -.3893556E-01  -.3293295E-01  -.1017888E-01
   .1030262E-01  -.4929130E-02  -.3103306E-01  -.2445211E-01   .4047614E-02
   .2639062E-01  -.6991008E-02  -.5866430E-01  -.6441413E-01  -.5292596E-01
  -.4738337E-01  -.2569418E-01  -.3858107E-02   .1689584E-02   .3155236E-02
   .2804268E-02   .6700580E-02   .1683725E-01   .4546550E-01   .6860105E-01
   .8056149E-01   .4398726E-01   .1149508E-01   .3303535E-01   .5125247E-01
   .6255500E-01   .7370862E-01   .9096898E-01   .8777731E-01   .3065315E-01
  -.3735441E-01  -.4577664E-01  -.2702912E-01  -.5813204E-02   .1865345E-01
   .2992641E-01   .2766907E-01   .1608485E-01   .1613009E-02   .2991687E-03
  -.1028341E-01  -.4972587E-01  -.9535464E-01  -.1149856E+00  -.9668078E-01
  -.5908978E-01  -.4525152E-01  -.6343616E-01  -.7273048E-01  -.5372183E-01
  -.8651173E-02   .1723125E-01  -.6491985E-02  -.2463684E-01  -.1758260E-01
  -.2030913E-01  -.1361393E-01   .3349620E-02   .1088633E-01  -.1243588E-02
  -.9970782E-02  -.6031614E-02  -.1284835E-01  -.1378376E-01  -.5845170E-02
  -.2489442E-02   .3772267E-02   .3056454E-01   .5360116E-01   .4978017E-01
   .4215254E-01   .1086908E-01  -.1729523E-01  -.1128036E-01   .9051231E-02
   .1962346E-01   .1208254E-01   .1325037E-01   .2399498E-01   .4999879E-01
   .7841797E-01   .8493673E-01   .5615736E-01   .2654669E-01   .1678013E-01
  -.1167856E-02  -.3126404E-01  -.6593594E-01  -.1890279E-01   .5616813E-01
   .7048274E-01   .5315594E-01  -.1337158E-01  -.4878910E-01  -.3130840E-01
  -.1782202E-01  -.1404502E-01  -.8990980E-02   .1630394E-01   .2799002E-01
   .1225952E-01  -.1062831E-01  -.2803773E-01  -.3556641E-01  -.3621417E-01
  -.2758706E-01  -.2571440E-01  -.2210774E-01   .7154986E-02   .3857399E-01
   .4597811E-01   .2748444E-01   .9430388E-02  -.8000446E-02  -.2250694E-01
  -.1422153E-01  -.1305573E-01  -.3226136E-01  -.5095699E-01  -.6925277E-01
  -.8625725E-01  -.1004832E+00  -.9492531E-01  -.4391720E-01  -.1149655E-01
  -.3115302E-01  -.5517203E-01  -.2057572E-01   .3033447E-01   .5206756E-01
   .4625351E-01   .6040988E-02  -.1854004E-01  -.2595242E-01  -.3343825E-01
  -.3145337E-01  -.1104322E-01   .1716891E-01   .3796973E-01   .5412852E-01
   .4659578E-01   .2158126E-01   .1189377E-02  -.1623125E-01  -.1664235E-01
   .8012031E-02   .1111993E-01  -.4277011E-02  -.1052965E-01  -.2463527E-01
  -.3879087E-01  -.3539737E-01  -.4765789E-02   .1454685E-01   .1363493E-01
   .3357284E-01   .5640550E-01   .5436036E-01   .3164798E-01   .1266269E-01
  -.1034345E-01  -.2036294E-01  -.1539896E-02   .1200465E-01  -.2492645E-02
  -.4632616E-01  -.7373257E-01  -.7744948E-01  -.4166597E-02   .6305851E-01
   .6533512E-01   .5502594E-01   .2565808E-01   .2900569E-01   .4787973E-01
   .5714742E-01   .6544918E-01   .7391821E-01   .7167316E-01   .6343663E-01
   .4807030E-01   .1605146E-01  -.1540843E-01  -.4605130E-01  -.5713056E-01
  -.3197739E-01  -.2215073E-01  -.3819319E-02   .2802914E-01   .3344531E-01
   .3045465E-01   .2525262E-01   .2092372E-01   .2386232E-01   .1228836E-01
  -.2282414E-01  -.5896072E-01  -.5776020E-01  -.3430839E-01  -.1113911E-01
   .3337571E-01   .7707861E-01   .9020906E-01   .6638897E-01   .4693756E-01
   .1353152E-01  -.3949422E-01  -.7844497E-01  -.7597251E-01  -.1270805E-01
   .3421500E-01   .3894166E-01   .4233213E-01   .4961185E-01   .6226902E-01
   .6156826E-01   .5417325E-01   .4705160E-01   .2181067E-01  -.2812145E-02
  -.5815037E-02   .2113845E-01   .4467392E-01   .2452177E-01   .9295201E-02
   .2139443E-01   .2613742E-01   .1746333E-01  -.6999336E-02  -.2255944E-01
  -.3726172E-02   .2777856E-01   .3172697E-01   .2380463E-01   .2121382E-01
   .5301816E-02   .6646170E-02   .1645551E-01   .1978886E-01   .8365878E-02
  -.4912234E-01  -.8780789E-01  -.9740610E-01  -.9977760E-01  -.9570371E-01
  -.9253254E-01  -.7401954E-01  -.4803300E-01  -.1444746E-01   .1138139E-02
  -.1057146E-01  -.2352852E-01  -.2578782E-01  -.1283076E-01   .8114945E-02
   .3406069E-01   .4630681E-01   .2695129E-01  -.8007164E-02  -.7990839E-02
   .1074962E-01   .1983171E-01   .3183609E-01   .3407704E-01   .1721849E-01
   .4692893E-02   .3338339E-02  -.7266593E-02  -.3179758E-01  -.6403162E-01
  -.8493244E-01  -.7912861E-01  -.6468337E-01  -.6467316E-01  -.5944769E-01
  -.2453104E-01   .2637207E-01   .3604678E-01   .2310401E-01   .8887264E-02
  -.6322455E-04  -.7545932E-02  -.2576006E-01  -.3161892E-01  -.1626791E-01
   .1529063E-02  -.2240114E-01  -.4324075E-01  -.3838349E-01  -.2316814E-01
  -.1055990E-01  -.1808442E-01  -.3653519E-01  -.6139869E-01  -.5920975E-01
  -.1871063E-01   .3130712E-01   .6561178E-01   .6551490E-01   .4040456E-01
   .2195176E-01  -.1595936E-02  -.2642985E-01  -.3621469E-01  -.5315993E-01
  -.7332735E-01  -.9398946E-01  -.9638236E-01  -.5817212E-01  -.1272418E-02
   .4259576E-01   .5340269E-01   .4331695E-01   .3016714E-01   .2284866E-01
   .2457147E-01   .9394917E-02  -.2684916E-02   .1192049E-01   .2647184E-01
   .3984101E-01   .4871809E-01   .4055710E-01   .5763912E-02  -.3718214E-01
  -.5471693E-01  -.2812244E-01   .1951567E-01   .4976584E-01   .5401112E-01
   .4197106E-01   .1503392E-01  -.4229770E-02   .6307882E-02   .1077347E-01
  -.1763247E-01  -.4387806E-01  -.5310493E-01  -.5728079E-01  -.4394527E-01
  -.2018740E-01   .1307484E-01   .3915117E-01   .4547419E-01   .3899417E-01
   .4341692E-01   .4110768E-01  -.2823681E-02  -.2744848E-01  -.1953528E-01
   .7446815E-02   .2981341E-01   .3261743E-01   .1496433E-01  -.1693307E-01
  -.1715232E-01   .2598996E-02   .1258280E-01   .3533394E-01   .6721000E-01
   .6668474E-01   .4283719E-01   .7598270E-02  -.2272526E-01  -.3107188E-01
  -.1394094E-01   .4989287E-02   .1847985E-01   .2925722E-01   .2203872E-01
   .1113470E-02  -.1926608E-01  -.2616226E-01  -.2291045E-01  -.1114266E-01
  -.8432475E-02  -.2102331E-01  -.4592656E-01  -.8049942E-01  -.8352163E-01
  -.5556031E-01  -.5026850E-01  -.5585601E-01  -.5714014E-01  -.4908923E-01
  -.3757847E-01  -.4593222E-01  -.6696559E-01  -.7025708E-01  -.5014365E-01
  -.3192741E-01  -.1362754E-01   .5437333E-02   .1843525E-01   .2246430E-01
   .2479404E-01   .1057325E-01  -.4177933E-02   .3655723E-02   .6368979E-02
   .7563513E-04  -.1005903E-01  -.2628271E-02   .8733567E-02   .1953134E-01
   .2581358E-01   .6972200E-02  -.1702222E-01  -.2504854E-01  -.1035436E-01
   .7564037E-02   .1356170E-01   .1153094E-01   .1182374E-01   .1147394E-01
   .1778372E-01   .7096222E-02  -.1672174E-01  -.2530395E-01  -.7805791E-02
   .1311243E-01   .2030655E-01   .4124314E-01   .6213382E-01   .7338652E-01
   .7759817E-01   .7757885E-01   .7114272E-01   .5424240E-01   .3723703E-01
   .2589572E-01   .6537204E-02  -.5858789E-02  -.6495202E-02   .3622244E-02
   .2663861E-01   .3735174E-01   .3279343E-01   .1085840E-01  -.2663675E-02
   .4956814E-02   .1957450E-01   .3362405E-01   .3325080E-01   .3390367E-01
   .4006046E-01   .3112635E-01   .1985848E-01   .1419042E-01   .5033948E-02
  -.7995460E-02  -.1508643E-01  -.1235888E-01  -.8012584E-02  -.7308711E-02
  -.2828796E-02   .9022657E-02   .9700012E-02   .4730645E-02   .5215219E-02
   .3445594E-02  -.9506290E-02  -.2205323E-01  -.2917276E-01  -.3577718E-01
  -.2961427E-01  -.1313711E-01   .2045564E-01   .5610370E-01   .7326528E-01
   .6913843E-01   .3440139E-01  -.6374048E-02  -.2552651E-01  -.2828145E-01
  -.2842315E-01  -.2602097E-01  -.1404303E-01  -.4413135E-02  -.6339835E-02
   .2053825E-02   .2161546E-01   .3254994E-01   .3851703E-01   .3165761E-01
   .6121989E-02  -.4506330E-02   .1648127E-01   .5569831E-01   .7981119E-01
   .6902580E-01   .2279642E-01  -.1632457E-01  -.3664697E-01  -.4640727E-01
  -.4523826E-01  -.3689866E-01  -.2247680E-01  -.1425857E-01  -.1099755E-01
  -.1445526E-01  -.1345456E-01  -.7197725E-03   .5646133E-02  -.3042141E-02
   .2695445E-02   .7990351E-02   .1417557E-02   .1743062E-01   .4066427E-01
   .4483922E-01   .2203108E-01  -.8850348E-02  -.1110344E-01   .5451249E-02
   .1463644E-01   .9735425E-02  -.2904326E-02  -.2006268E-01  -.3389379E-01
  -.4214244E-01  -.4852959E-01  -.5152626E-01  -.4696677E-01  -.3568242E-01
  -.2352699E-01  -.7666919E-02  -.1091908E-02   .1201142E-02   .8857353E-02
   .1293744E-01   .8152716E-02   .1828808E-02   .1314988E-01   .1946683E-01
   .4189364E-02  -.1448368E-01  -.2882989E-01  -.3436738E-01  -.2858184E-01
  -.2799525E-01  -.2141616E-01  -.7868426E-02  -.1459672E-02  -.4766418E-02
  -.1308850E-01  -.1425427E-01  -.2070058E-01  -.3444090E-01  -.5240505E-01
  -.6703583E-01  -.7227446E-01  -.6821680E-01  -.6195492E-01  -.4906305E-01
  -.2454011E-01  -.9306321E-02  -.8994105E-02  -.2184193E-01  -.2772417E-01
  -.1578395E-01  -.6979218E-02  -.2479902E-02   .4149549E-03   .8536519E-03
   .5528409E-02   .1588246E-02  -.7779336E-02   .1019281E-02   .1232914E-01
   .5837956E-02  -.1883345E-02   .3862413E-02   .2302321E-01   .3966155E-01
   .4591221E-01   .2972797E-01   .1069125E-02  -.1181950E-01  -.6475617E-02
   .1696714E-01   .3148796E-01   .2681442E-01   .1387786E-01   .1527799E-02
   .3953459E-02   .1457619E-02  -.6833861E-02  -.1284666E-01  -.1832600E-01
  -.1596664E-01   .6617279E-02   .3692566E-01   .4895972E-01   .5024094E-01
   .3858754E-01   .3855806E-01   .4969554E-01   .4504444E-01   .2779940E-01
   .8514367E-02  -.2894232E-02  -.5719530E-02  -.8221489E-02  -.1650583E-01
  -.2321019E-01  -.2828560E-01  -.1548144E-01   .1005946E-01   .1915694E-01
   .1338078E-01   .6410205E-02   .1585857E-01   .3033349E-01   .3208697E-01
   .2494095E-01   .1025306E-01  -.1914421E-02  -.5694439E-02  -.6171696E-02
   .5790966E-02   .1888991E-01   .2278641E-01   .2798443E-01   .3833754E-01
   .4891300E-01   .3489932E-01   .2326021E-01   .4702427E-01   .7926555E-01
   .9296833E-01   .8284392E-01   .5154328E-01   .3836702E-01   .5439235E-01
   .6215873E-01   .4636107E-01   .1663940E-01  -.1457556E-01  -.3434816E-01
  -.3716223E-01  -.3150011E-01  -.3475687E-01  -.4712222E-01  -.6317284E-01
  -.7657757E-01  -.5679661E-01  -.2868429E-01  -.2537506E-02   .2577780E-01
   .3538732E-01   .4160228E-01   .4517443E-01   .2419109E-01  -.8324656E-03
  -.8462983E-02  -.1352310E-01  -.2487559E-01  -.3773769E-01  -.4958999E-01
  -.4671654E-01  -.3563822E-01  -.2562070E-01  -.3225475E-02   .1348019E-01
   .1231851E-01  -.2059306E-02  -.1663602E-01  -.1788440E-01  -.1125022E-01
  -.1763531E-01  -.3624103E-01  -.4160817E-01  -.2818588E-01  -.1324890E-01
  -.1239812E-01  -.2103538E-01  -.2956247E-01  -.2316187E-01  -.1469985E-01
  -.7497525E-02   .2982057E-02  -.9754407E-03  -.1205560E-01  -.1161996E-01
  -.1954334E-02  -.3825931E-02  -.1038545E-01  -.6915307E-02   .3923314E-02
   .1633784E-01   .2319336E-01   .1585456E-01   .6102441E-02   .6516631E-03
  -.1496355E-02   .2070686E-02   .5326272E-03  -.3014831E-02  -.6045150E-02
  -.8752129E-02  -.5397248E-02   .9529532E-02   .2088529E-01   .1970117E-01
   .1986345E-01   .2225443E-01   .1039499E-01  -.1804760E-01  -.3853012E-01
  -.4203678E-01  -.3445808E-01  -.2812888E-01  -.2734543E-01  -.2574903E-01
  -.2354981E-01  -.2305501E-01  -.1832721E-01  -.1194905E-01  -.1110745E-01
  -.1020873E-01  -.1330433E-01  -.2201708E-01  -.1875400E-01  -.4989602E-03
   .1054264E-01   .1312755E-02  -.1692577E-01  -.2810487E-01  -.2593523E-01
  -.6887655E-02   .1551062E-01   .2086776E-01   .1946025E-01   .2189713E-01
   .2446457E-01   .2205440E-01   .1878846E-01   .2128041E-01   .2078581E-01
   .1568999E-01   .1305134E-01   .9613018E-02   .1206519E-01   .1954495E-01
   .1258252E-01   .2234714E-02  -.1201051E-01  -.2544280E-01  -.2400042E-01
  -.1590969E-01  -.3236098E-02   .2907455E-02   .3116648E-02   .2480260E-02
  -.2930271E-03   .1202385E-02   .5116217E-02   .6157728E-02   .8193741E-02
   .1084175E-01   .1152218E-01   .8396994E-02   .5436023E-02   .4847573E-02
   .2485343E-02  -.8310247E-02  -.2500552E-01  -.2919457E-01  -.1654852E-01
   .1826299E-03   .1543070E-01   .2153753E-01   .1510345E-01   .4813782E-02
  -.1617230E-02   .2897377E-02   .1351872E-01   .2176245E-01   .1966848E-01
   .2062430E-01   .2590697E-01   .1728601E-01   .4073020E-02  -.1843753E-03
   .1417109E-02   .4625094E-02   .5230038E-02   .6614261E-02   .8841006E-02
   .9633628E-02   .7461111E-02  -.3254862E-03   .7443602E-04   .9202499E-02
   .1663124E-01   .1743610E-01   .1305120E-01   .2853323E-02  -.7922897E-02
  -.1449876E-01  -.2049424E-01  -.2373062E-01  -.1887942E-01  -.1874776E-01
  -.2030930E-01  -.1778268E-01  -.1673405E-01  -.1894941E-01  -.2754997E-01
  -.2980205E-01  -.2737744E-01  -.2395118E-01  -.1564729E-01  -.3642832E-02
   .5988082E-02   .5801497E-02   .1997312E-03  -.5763115E-02  -.1187896E-01
  -.1736445E-01  -.2322020E-01  -.2516526E-01  -.1622999E-01  -.1217338E-01
  -.2484885E-01  -.3962450E-01  -.5041501E-01  -.5432358E-01  -.5225495E-01
  -.4266586E-01  -.2255241E-01  -.4038323E-02   .6988964E-02   .5463112E-02
  -.1195536E-01  -.2203085E-01  -.1998365E-01  -.1196740E-01   .3732502E-02
   .1744443E-01   .2071971E-01   .1476094E-01   .1408474E-01   .1932148E-01
   .1990906E-01   .7508987E-02  -.3978191E-02  -.2622695E-03   .2453031E-02
   .5011252E-02   .9910371E-02   .1054691E-01   .1018793E-01   .9362808E-02
   .1645595E-01   .2134690E-01   .1135198E-01   .3132878E-02  -.3709225E-02
  -.1072779E-01  -.1139583E-01  -.9669940E-02   .4974742E-03   .1559557E-01
   .2124030E-01   .2166263E-01   .2043971E-01   .1370470E-01   .9792030E-02
   .1157198E-01   .1968919E-01   .2465562E-01   .2458019E-01   .2728936E-01
   .2851442E-01   .2962219E-01   .3277608E-01   .3860033E-01   .3957447E-01
   .3583418E-01   .3669816E-01   .3580061E-01   .3166557E-01   .2838631E-01
   .2429004E-01   .2934112E-01   .3909950E-01   .4303878E-01   .4119976E-01
   .3163118E-01   .1727370E-01   .9343592E-03  -.1613122E-01  -.3213600E-01
  -.3983085E-01  -.4021331E-01  -.3294986E-01  -.2166250E-01  -.1451023E-01
  -.1231311E-01  -.1271088E-01  -.8558426E-02  -.1644834E-02   .8470574E-03
  -.2082352E-02  -.5425881E-02  -.2587192E-02   .3051397E-02   .2176266E-02
  -.5307446E-02  -.1394886E-01  -.1511571E-01  -.9228247E-02  -.7152521E-02
  -.8762057E-02  -.4138373E-02   .5410890E-02   .1215005E-01   .1525495E-01
   .1076800E-01   .4619374E-03  -.1083352E-01  -.1614668E-01  -.1435146E-01
  -.9017867E-02  -.3935189E-02  -.2856124E-03   .7816263E-02   .1515620E-01
   .1956669E-01   .2271443E-01   .2652414E-01   .3024205E-01   .2756456E-01
   .1894558E-01   .4546246E-02  -.8839204E-02  -.1991843E-01  -.2272751E-01
  -.1556710E-01  -.8381192E-02  -.2435606E-02   .7865793E-03  -.2410096E-02
  -.6773652E-02  -.3285249E-02  -.7638065E-03  -.3779945E-02  -.6468664E-02
  -.7799764E-02  -.8008864E-02  -.9390966E-02  -.1166353E-01  -.1320985E-01
  -.1304053E-01  -.9924438E-02  -.3805464E-02   .1326150E-02   .2653163E-02
   .3751696E-02   .6941227E-02   .6868798E-02   .4252489E-02   .4290218E-02
   .1776927E-02  -.1155586E-02  -.2627459E-02  -.6832932E-02  -.1186155E-01
  -.1220632E-01  -.8252820E-02  -.2361316E-02   .1861466E-02   .4801087E-02
   .6194387E-02   .8083406E-02   .9923466E-02   .1021006E-01   .8253680E-02
   .6540056E-02   .5395591E-02  -.2011739E-03  -.4017020E-02  -.7235146E-02
  -.1052264E-01  -.9510825E-02  -.6358034E-02  -.3508185E-02  -.2443337E-02
  -.1280570E-02  -.4738403E-02  -.7709697E-02  -.7128332E-02  -.6709148E-02
  -.2183445E-02  -.4035834E-03   .1421158E-02   .6781218E-02   .1375900E-01
   .2171700E-01   .2466577E-01   .2246559E-01   .2215853E-01   .1775208E-01
   .1128625E-01   .2621308E-02  -.2686820E-02   .1730751E-02   .3045481E-02
  -.2537030E-02  -.1281154E-01  -.1945587E-01  -.1808403E-01  -.1760366E-01
  -.2193974E-01  -.2602999E-01  -.2721631E-01  -.2802217E-01  -.2844961E-01
  -.2620057E-01  -.2593849E-01  -.2823151E-01  -.3023180E-01  -.3132530E-01
  -.2709543E-01  -.1873965E-01  -.1407934E-01  -.8784592E-02  -.4734241E-02
  -.4370171E-02  -.3300263E-02  -.1877435E-02   .4289411E-02   .1155990E-01
   .1642318E-01   .1946780E-01   .1879453E-01   .1555493E-01   .1226433E-01
   .1146151E-01   .1468972E-01   .1840856E-01   .1937646E-01   .1961811E-01
   .1879591E-01   .1670890E-01   .1207903E-01   .8039741E-02   .4701190E-02
   .1508499E-02   .2680386E-02   .1567472E-02   .8319573E-03   .1281681E-02
   .2248544E-02  -.8492941E-03  -.8199513E-02  -.1111273E-01  -.1255920E-01
  -.1089568E-01  -.9465743E-02  -.1155685E-01  -.1685993E-01  -.1875622E-01
  -.1531077E-01  -.8047458E-02  -.2240709E-02  -.2046001E-02  -.1596294E-02
  -.1746348E-02  -.5727523E-02  -.1356940E-01  -.1781374E-01  -.2041792E-01
  -.2381566E-01  -.2576500E-01  -.2292340E-01  -.1445854E-01  -.5481648E-02
  -.1151435E-04   .5911785E-03   .2117990E-02   .4009960E-02   .6451709E-02
   .9980778E-02   .1456656E-01   .2027129E-01   .2338929E-01   .2187854E-01
   .1984656E-01   .1871422E-01   .1811636E-01   .1687692E-01   .1444407E-01
   .1119727E-01   .7141603E-02   .6286697E-02   .5848969E-02   .1970779E-02
  -.1477991E-02   .8209368E-03   .8169883E-02   .1244557E-01   .1069305E-01
   .9313856E-02   .7353257E-02   .2957918E-02   .6545967E-03  -.2370457E-03
   .3319507E-03   .3220426E-02   .5947739E-02   .7547952E-02   .9684682E-02
   .8970513E-02   .4433381E-02   .2006628E-02   .2156394E-02   .4850038E-02
   .1078422E-01   .1576266E-01   .1735572E-01   .1789818E-01   .1954734E-01
   .2218997E-01   .2487953E-01   .2593300E-01   .2595526E-01   .2698527E-01
   .2609768E-01   .2042832E-01   .1461821E-01   .1312780E-01   .1281650E-01
   .1192788E-01   .9681643E-02   .8707342E-02   .9980100E-02   .1026142E-01
   .8148792E-02   .5983125E-02   .2950458E-02  -.3225851E-02  -.9570462E-02
  -.1487263E-01  -.1937921E-01  -.2111546E-01  -.1893492E-01  -.1828744E-01
  -.2014100E-01  -.2118162E-01  -.1902556E-01  -.1818122E-01  -.1808659E-01
  -.1824695E-01  -.1731082E-01  -.1563213E-01  -.1432472E-01  -.1577438E-01
  -.1929769E-01  -.1847173E-01  -.1975410E-01  -.2372316E-01  -.2964450E-01
  -.3233652E-01  -.3049669E-01  -.2688817E-01  -.2634170E-01  -.2893377E-01
  -.3330151E-01  -.3677918E-01  -.3947390E-01  -.3997192E-01  -.4062769E-01
  -.4251438E-01  -.3893701E-01  -.3343440E-01  -.2896185E-01  -.2257846E-01
  -.1552965E-01  -.1015920E-01  -.7791631E-02  -.5903651E-02  -.2203026E-02
   .1089518E-02   .3118913E-02   .2028515E-02   .5656833E-03  -.9799246E-03
  -.1027299E-02   .5553676E-03  -.1466325E-02  -.4698247E-02  -.6100550E-02
  -.4331110E-02  -.2549184E-03   .1089846E-02  -.8497641E-03  -.6384373E-02
  -.7559790E-02  -.4874064E-02  -.1813672E-02   .2741841E-02   .6387465E-02
   .1030119E-01   .1273659E-01   .1333759E-01   .1571862E-01   .1834014E-01
   .2009690E-01   .2135736E-01   .2137603E-01   .2120763E-01   .2230991E-01
   .2371497E-01   .2320132E-01   .2388062E-01   .2783453E-01   .3468226E-01
   .4313526E-01   .4594346E-01   .4529723E-01   .4513754E-01   .4340751E-01
   .4078634E-01   .3865337E-01   .3809253E-01   .3650789E-01   .3205974E-01
   .2645015E-01   .2059170E-01   .1676874E-01   .1778023E-01   .1972409E-01
   .2008912E-01   .1987092E-01   .2062922E-01   .2066082E-01   .1697569E-01
   .1438120E-01   .1364362E-01   .1158191E-01   .9653195E-02   .5342064E-02
   .1069778E-02  -.4349311E-03   .5292936E-03   .3112482E-02   .4318159E-02
   .7487946E-02   .1044376E-01   .1010402E-01   .9846331E-02   .8533491E-02
   .7193773E-02   .3753321E-02  -.1433309E-02  -.5812340E-02  -.8889627E-02
  -.1033273E-01  -.1140267E-01  -.1095546E-01  -.1139474E-01  -.1267563E-01
  -.1447810E-01  -.1715519E-01  -.1901967E-01  -.2094642E-01  -.2199228E-01
  -.2191827E-01  -.2153880E-01  -.2036551E-01  -.1976250E-01  -.2041368E-01
  -.1887214E-01  -.1528985E-01  -.1494867E-01  -.1795662E-01  -.1990093E-01
  -.1924530E-01  -.1863466E-01  -.1901414E-01  -.1867018E-01  -.1770094E-01
  -.1676470E-01  -.1684796E-01  -.1711244E-01  -.1561870E-01  -.1294951E-01
  -.1079541E-01  -.9678702E-02  -.9174540E-02  -.8210565E-02  -.7431245E-02
  -.7548436E-02  -.7920594E-02  -.8244143E-02  -.8127320E-02  -.7361299E-02
  -.7037548E-02  -.6603936E-02  -.6183655E-02  -.6734110E-02  -.8089592E-02
  -.9256730E-02  -.9720542E-02  -.9476511E-02  -.7888274E-02  -.6522722E-02
  -.5367326E-02  -.2880189E-02  -.5864757E-03   .3518440E-03   .1064648E-02
   .1401662E-02   .1571686E-02   .1638110E-02   .1078272E-02   .1084284E-02
   .1320508E-02   .1351311E-02   .1331960E-02   .2337298E-02   .3677943E-02
   .4778694E-02   .5798278E-02   .5515020E-02   .5069927E-02   .4511623E-02
   .4639410E-02   .5327612E-02   .5454729E-02   .6147413E-02   .6471482E-02
   .6574080E-02   .6220126E-02   .5207568E-02   .4765285E-02   .4869295E-02
   .5451374E-02   .6386990E-02   .7267328E-02   .7568868E-02   .7079339E-02
   .6452149E-02   .6151660E-02   .6361870E-02   .6605689E-02   .6135243E-02
   .5502025E-02   .4917352E-02   .4454825E-02   .4468112E-02   .4521201E-02
   .4650288E-02   .4361115E-02   .3641780E-02   .3336201E-02   .3102560E-02
   .2841174E-02   .2402862E-02   .1904257E-02   .1626282E-02   .1809985E-02
   .2273008E-02   .2602694E-02   .2625557E-02   .2267338E-02   .1636676E-02
   .8750501E-03   .1770995E-03  -.2877373E-03  -.6365659E-03  -.8189254E-03
  -.5359957E-03  -.2133061E-03  -.3651879E-03  -.6649287E-03  -.9194558E-03
  -.1004834E-02  -.9569890E-03  -.1049501E-02  -.1149711E-02  -.1177574E-02
  -.1129158E-02  -.1118459E-02  -.1328784E-02  -.1542946E-02  -.1695231E-02
  -.1666002E-02  -.1516239E-02  -.1398186E-02  -.1310759E-02  -.1243009E-02
  -.1167349E-02  -.1122791E-02  -.1089304E-02  -.1065390E-02  -.1077781E-02
  -.1068892E-02  -.1007570E-02  -.9364316E-03  -.8638998E-03  -.7981884E-03
  -.7170346E-03  -.6571183E-03  -.6203239E-03  -.5719028E-03  -.5119760E-03
  -.4479405E-03  -.3800511E-03  -.3061832E-03  -.2268044E-03  -.1467908E-03
  -.6808499E-04   .8221236E-05   .8160685E-04   .1514668E-03   .2171542E-03
