# Supplementary material for: Earthquake Response Analysis of Tall Reinforced Concrete Chimneys considering Eccentricity
Source: Hindawi journal article supplement (doi:10.1155/2020/1417969), 2020-03-11
Supplement: f1 [file 1417969.f1.zip › 1417969.f1/Four kinds of earthquake records/Rock/MORGAN G01-UP.txt]

PEER STRONG MOTION DATABASE RECORD. PROCESSING BY PACIFIC ENGINEERING.
MORGAN HILL 04/24/84 04:24, GILROY ARRAY #1,  UP (CDMG STATION 47379)
ACCELERATION TIME HISTORY IN UNITS OF G. FILTER POINTS: HP=0.1 Hz LP=33.0 Hz
NPTS=  5996, DT= .00500 SEC
   .4099405E-03   .4360167E-03   .4283191E-03   .4187949E-03   .4135744E-03
   .4151572E-03   .4211969E-03   .4254370E-03   .4234410E-03   .4163469E-03
   .4058235E-03   .3929360E-03   .3780865E-03   .3605236E-03   .3450889E-03
   .3424826E-03   .3577346E-03   .3796693E-03   .3906994E-03   .3784639E-03
   .3466748E-03   .3173698E-03   .2983043E-03   .2851826E-03   .2611644E-03
   .2026588E-03   .1138046E-03   .2217764E-04  -.3947692E-04  -.5026322E-04
  -.2064635E-05   .8131801E-04   .1717540E-03   .2352722E-03   .2097527E-03
   .8952786E-04  -.5744003E-04  -.1394223E-03  -.9020754E-04   .1034012E-03
   .3968021E-03   .6907217E-03   .8359875E-03   .6821872E-03   .2213167E-03
  -.3586286E-03  -.8231090E-03  -.9384244E-03  -.6342722E-03  -.1035190E-03
   .3838659E-03   .6469867E-03   .6059180E-03   .2877813E-03  -.1463689E-03
  -.4130550E-03  -.2845435E-03   .1892860E-03   .7055443E-03   .9728066E-03
   .9370271E-03   .6922591E-03   .3337866E-03   .2613192E-05  -.1800560E-03
  -.7321123E-04   .3821520E-03   .9632411E-03   .1283302E-02   .1200349E-02
   .8540903E-03   .4409043E-03   .1147555E-03   .9326346E-04   .5894112E-03
   .1417303E-02   .2046893E-02   .2040304E-02   .1306451E-02   .2735777E-03
  -.3922141E-03  -.3242431E-03   .4003512E-03   .1403976E-02   .2076928E-02
   .1916494E-02   .1065234E-02   .2351864E-03   .6019718E-04   .5493591E-03
   .1367635E-02   .2293764E-02   .3055710E-02   .3363895E-02   .3457109E-02
   .3868083E-02   .4719654E-02   .5698392E-02   .6265887E-02   .6023774E-02
   .4859442E-02   .2803471E-02   .1200467E-03  -.2472664E-02  -.4079960E-02
  -.4451605E-02  -.4021832E-02  -.3189937E-02  -.1851245E-02   .1116552E-03
   .2115088E-02   .3130572E-02   .2508630E-02   .6502171E-03  -.1430538E-02
  -.2619611E-02  -.2404014E-02  -.1537668E-02  -.1195862E-02  -.2142792E-02
  -.4029022E-02  -.5400415E-02  -.5159505E-02  -.3544377E-02  -.1819181E-02
  -.1190620E-02  -.2021260E-02  -.3555089E-02  -.4306819E-02  -.3210907E-02
  -.9876145E-04   .4205817E-02   .8125201E-02   .9686650E-02   .7868097E-02
   .3441274E-02  -.2153579E-02  -.7318044E-02  -.1032811E-01  -.9852383E-02
  -.5915354E-02  -.3260197E-03   .4418271E-02   .6891983E-02   .7208140E-02
   .6312859E-02   .5107337E-02   .3868123E-02   .2425642E-02   .2549334E-03
  -.2845031E-02  -.6350292E-02  -.9413537E-02  -.1069091E-01  -.9225171E-02
  -.5688521E-02  -.2211215E-02  -.1120856E-02  -.3422562E-02  -.8163639E-02
  -.1296808E-01  -.1523514E-01  -.1358353E-01  -.8632294E-02  -.2305021E-02
   .3270262E-02   .6723224E-02   .7505074E-02   .5680167E-02   .2106533E-02
  -.1773334E-02  -.4330759E-02  -.4923713E-02  -.4440110E-02  -.4397929E-02
  -.5484237E-02  -.6930570E-02  -.7326172E-02  -.5788695E-02  -.2557990E-02
   .9227025E-03   .3218174E-02   .3979260E-02   .4072069E-02   .4629607E-02
   .5793592E-02   .6840388E-02   .7222383E-02   .6942357E-02   .6038742E-02
   .4751721E-02   .3539111E-02   .2507393E-02   .1600330E-02   .4917755E-03
  -.1264086E-02  -.4082756E-02  -.7740079E-02  -.1071254E-01  -.1116934E-01
  -.8357887E-02  -.3477653E-02   .6498369E-03   .1426568E-02  -.1483615E-02
  -.6078762E-02  -.9814037E-02  -.1105967E-01  -.9961790E-02  -.8303140E-02
  -.8030125E-02  -.8689728E-02  -.8294259E-02  -.5710284E-02  -.1477795E-02
   .3274353E-02   .8270098E-02   .1281513E-01   .1452400E-01   .1149773E-01
   .4553191E-02  -.3586774E-02  -.1002976E-01  -.1319787E-01  -.1396229E-01
  -.1442853E-01  -.1621491E-01  -.1953753E-01  -.2284309E-01  -.2355876E-01
  -.1993845E-01  -.1267060E-01  -.5306116E-02  -.2658552E-02  -.7665051E-02
  -.1997800E-01  -.3646103E-01  -.5307395E-01  -.6661051E-01  -.7422955E-01
  -.7274206E-01  -.5876417E-01  -.2974468E-01   .1195558E-01   .5570464E-01
   .8569922E-01   .9244352E-01   .8105324E-01   .6698619E-01   .6254071E-01
   .6706671E-01   .7066491E-01   .6512398E-01   .4850844E-01   .2164935E-01
  -.1447768E-01  -.5301550E-01  -.7897573E-01  -.7845280E-01  -.5021389E-01
  -.7336470E-02   .3189063E-01   .5522421E-01   .6047986E-01   .5209250E-01
   .3628146E-01   .1915384E-01   .5559785E-02  -.2904939E-02  -.6538461E-02
  -.6952121E-02  -.7665466E-02  -.1249626E-01  -.2263759E-01  -.3285502E-01
  -.3223168E-01  -.1184684E-01   .2678142E-01   .6815983E-01   .9029265E-01
   .7962472E-01   .4054556E-01  -.7396211E-02  -.4181703E-01  -.4967050E-01
  -.3212037E-01  -.2380047E-02   .2104217E-01   .2486558E-01   .8259990E-02
  -.1837326E-01  -.4063044E-01  -.4856748E-01  -.3996176E-01  -.1893306E-01
   .7336451E-02   .3120752E-01   .4621858E-01   .4834130E-01   .3635272E-01
   .1245651E-01  -.1615376E-01  -.3950207E-01  -.5071126E-01  -.4804872E-01
  -.3226872E-01  -.5964920E-02   .2541412E-01   .5303025E-01   .6585504E-01
   .5732889E-01   .3039554E-01  -.4120950E-02  -.3289880E-01  -.4720982E-01
  -.4586337E-01  -.3282728E-01  -.1462538E-01   .1756274E-02   .1143820E-01
   .1284228E-01   .7852389E-02   .1776737E-02   .1806760E-02   .1221173E-01
   .3077925E-01   .4974809E-01   .6050758E-01   .5959316E-01   .5079264E-01
   .4069500E-01   .3252835E-01   .2495698E-01   .1616378E-01   .7014300E-02
  -.1309665E-03  -.4380262E-02  -.7332666E-02  -.1157465E-01  -.1826767E-01
  -.2646271E-01  -.3439223E-01  -.4041710E-01  -.4306879E-01  -.4066819E-01
  -.3266317E-01  -.2234538E-01  -.1526965E-01  -.1429857E-01  -.1709684E-01
  -.1811011E-01  -.1293395E-01  -.1506001E-02   .1170714E-01   .1937787E-01
   .1550419E-01   .9173064E-03  -.1656750E-01  -.2740712E-01  -.2607830E-01
  -.1322510E-01   .5642369E-02   .2352603E-01   .3522624E-01   .3702508E-01
   .2702388E-01   .9467673E-02  -.5806391E-02  -.1094939E-01  -.6310898E-02
   .5511091E-03   .2415149E-02  -.1844719E-02  -.8468928E-02  -.1291216E-01
  -.1270184E-01  -.8077384E-02  -.1368058E-02   .4143858E-02   .6362930E-02
   .5688687E-02   .3577127E-02   .4849039E-03  -.4186715E-02  -.9947813E-02
  -.1300196E-01  -.8132805E-02   .6631934E-02   .2696828E-01   .4328842E-01
   .4603165E-01   .3215277E-01   .6969207E-02  -.1979828E-01  -.3878042E-01
  -.4546277E-01  -.4240235E-01  -.3615488E-01  -.3168106E-01  -.2965604E-01
  -.2792417E-01  -.2411775E-01  -.1724481E-01  -.8095271E-02   .4818500E-03
   .3783789E-02  -.1755189E-02  -.1482122E-01  -.2855913E-01  -.3499117E-01
  -.3049942E-01  -.1728177E-01  -.8318231E-03   .1397081E-01   .2482539E-01
   .3113104E-01   .3238741E-01   .2771936E-01   .1712971E-01   .3464127E-02
  -.7962502E-02  -.1306970E-01  -.1125572E-01  -.5067084E-02   .2070404E-02
   .8308223E-02   .1370908E-01   .1867892E-01   .2292424E-01   .2498409E-01
   .2400964E-01   .2091984E-01   .1724302E-01   .1326560E-01   .7939917E-02
   .7796368E-03  -.7512651E-02  -.1532801E-01  -.2091145E-01  -.2300121E-01
  -.2122619E-01  -.1617057E-01  -.8217279E-02   .2130291E-02   .1272287E-01
   .1937695E-01   .1855936E-01   .1132165E-01   .2637601E-02  -.3136789E-02
  -.4738853E-02  -.3504747E-02  -.2037458E-02  -.1710525E-02  -.1942280E-02
  -.6954176E-03   .3862770E-02   .1110496E-01   .1718030E-01   .1711553E-01
   .8672934E-02  -.5135196E-02  -.1719036E-01  -.2072484E-01  -.1460334E-01
  -.3784081E-02   .5013767E-02   .7918756E-02   .5902756E-02   .2767424E-02
   .2471734E-02   .6719261E-02   .1350451E-01   .1788266E-01   .1565245E-01
   .6712824E-02  -.5459883E-02  -.1586069E-01  -.2038903E-01  -.1782974E-01
  -.1078535E-01  -.4053889E-02  -.1369489E-02  -.2565436E-02  -.3992644E-02
  -.1371963E-02   .7439770E-02   .1996486E-01   .2947830E-01   .3005827E-01
   .2011828E-01   .1870458E-02  -.1900233E-01  -.3427817E-01  -.3724317E-01
  -.2715921E-01  -.1000387E-01   .5684909E-02   .1545892E-01   .2092992E-01
   .2543924E-01   .2906846E-01   .2885725E-01   .2312629E-01   .1402921E-01
   .5349045E-02  -.1412529E-03  -.1518685E-02  -.2827490E-03   .3016801E-03
  -.2460136E-02  -.8369356E-02  -.1453757E-01  -.1742492E-01  -.1508187E-01
  -.8693933E-02  -.2068612E-02   .9097736E-03  -.1349164E-02  -.7443504E-02
  -.1383407E-01  -.1707014E-01  -.1573946E-01  -.1128648E-01  -.6298847E-02
  -.3175101E-02  -.3133436E-02  -.5499180E-02  -.8039440E-02  -.8163162E-02
  -.4356309E-02   .2534385E-02   .1016796E-01   .1526773E-01   .1453880E-01
   .6894241E-02  -.5130019E-02  -.1603631E-01  -.1980495E-01  -.1372585E-01
  -.6350955E-03   .1251245E-01   .1895428E-01   .1662125E-01   .8348627E-02
  -.9236246E-03  -.6689870E-02  -.6476583E-02  -.1284756E-02   .4756023E-02
   .6278505E-02   .7468110E-03  -.8649791E-02  -.1528122E-01  -.1439564E-01
  -.7167346E-02   .1025804E-02   .4919579E-02   .2872795E-02  -.2532355E-02
  -.7677871E-02  -.1031626E-01  -.9548117E-02  -.5953966E-02  -.1334059E-02
   .2514475E-02   .4868997E-02   .6010106E-02   .6927379E-02   .7838673E-02
   .7501838E-02   .4340857E-02  -.1649258E-02  -.8643554E-02  -.1427787E-01
  -.1684399E-01  -.1638465E-01  -.1420638E-01  -.1164575E-01  -.8889960E-02
  -.5370490E-02  -.6270849E-03   .4931172E-02   .9907644E-02   .1247184E-01
   .1098843E-01   .4380800E-02  -.7168180E-02  -.2096938E-01  -.3137840E-01
  -.3254370E-01  -.2327526E-01  -.8135182E-02   .6048183E-02   .1437043E-01
   .1635518E-01   .1493601E-01   .1296346E-01   .1097005E-01   .8459448E-02
   .6127363E-02   .5324892E-02   .6207607E-02   .7835700E-02   .9673074E-02
   .1143977E-01   .1240627E-01   .1162124E-01   .8411202E-02   .3181832E-02
  -.1939686E-02  -.4314127E-02  -.3031935E-02   .1341422E-03   .2035951E-02
   .6562718E-03  -.3291546E-02  -.7042384E-02  -.8441987E-02  -.7335505E-02
  -.4466428E-02  -.9003150E-04   .6606459E-02   .1603514E-01   .2568970E-01
   .3034830E-01   .2629551E-01   .1479425E-01   .9978218E-03  -.8825334E-02
  -.1069959E-01  -.5401069E-02   .2296303E-02   .6975097E-02   .5261625E-02
  -.2698664E-02  -.1375951E-01  -.2359372E-01  -.2894409E-01  -.2893765E-01
  -.2517411E-01  -.2035003E-01  -.1624773E-01  -.1296821E-01  -.9816093E-02
  -.6484951E-02  -.3310048E-02  -.9797075E-03   .2304792E-03   .9877071E-03
   .2426882E-02   .5418439E-02   .9927117E-02   .1497574E-01   .1867835E-01
   .1904907E-01   .1543326E-01   .9169124E-02   .2647409E-02  -.1926743E-02
  -.4083490E-02  -.4835062E-02  -.4853897E-02  -.4283054E-02  -.3256818E-02
  -.2101306E-02  -.8618693E-03   .9017476E-03   .2538530E-02   .2305710E-02
  -.6032946E-03  -.4906850E-02  -.8057068E-02  -.8388551E-02  -.6277970E-02
  -.3139291E-02  -.9057017E-05   .2918394E-02   .5418878E-02   .6907317E-02
   .6977141E-02   .5786475E-02   .4157364E-02   .2753885E-02   .2309498E-02
   .3177079E-02   .4331119E-02   .4367520E-02   .3143483E-02   .1777205E-02
   .1291996E-02   .2158152E-02   .4415785E-02   .7242500E-02   .9599174E-02
   .1072828E-01   .1069874E-01   .1007536E-01   .9008333E-02   .6899091E-02
   .3026175E-02  -.2264287E-02  -.7494129E-02  -.1106926E-01  -.1219527E-01
  -.1148819E-01  -.1087103E-01  -.1240824E-01  -.1671917E-01  -.2263534E-01
  -.2806260E-01  -.2973258E-01  -.2469491E-01  -.1323831E-01   .5831963E-03
   .1098582E-01   .1426247E-01   .1151343E-01   .7938687E-02   .8607391E-02
   .1448141E-01   .2195078E-01   .2528149E-01   .2106158E-01   .1075452E-01
  -.3880989E-03  -.7260453E-02  -.8013285E-02  -.4452924E-02  -.9335962E-03
  -.1776902E-02  -.8089299E-02  -.1709273E-01  -.2433626E-01  -.2718895E-01
  -.2589635E-01  -.2155492E-01  -.1498474E-01  -.7790915E-02  -.1802416E-02
   .2712201E-02   .7219053E-02   .1335254E-01   .2141350E-01   .2942426E-01
   .3350487E-01   .3047089E-01   .2029770E-01   .6623950E-02  -.6097583E-02
  -.1495760E-01  -.1985324E-01  -.2268788E-01  -.2508115E-01  -.2749053E-01
  -.2934237E-01  -.2935845E-01  -.2635915E-01  -.1968837E-01  -.9415885E-02
   .2707032E-02   .1372569E-01   .2167798E-01   .2644301E-01   .2871952E-01
   .2909637E-01   .2866525E-01   .2841641E-01   .2792350E-01   .2517752E-01
   .1865502E-01   .8949805E-02  -.1535363E-02  -.1007603E-01  -.1499700E-01
  -.1570714E-01  -.1242485E-01  -.6755243E-02  -.1637892E-02   .3158003E-03
  -.1001149E-02  -.2714683E-02  -.1562892E-02   .3314666E-02   .1050861E-01
   .1718418E-01   .1990481E-01   .1658067E-01   .7683830E-02  -.4032518E-02
  -.1415703E-01  -.1834225E-01  -.1568978E-01  -.1002192E-01  -.6623969E-02
  -.8104226E-02  -.1346118E-01  -.1951995E-01  -.2370658E-01  -.2579654E-01
  -.2708509E-01  -.2839507E-01  -.2900489E-01  -.2700059E-01  -.2099412E-01
  -.1162680E-01  -.1500956E-02   .6013432E-02   .8996972E-02   .8609425E-02
   .8124081E-02   .1098026E-01   .1874445E-01   .2957383E-01   .3852451E-01
   .4026926E-01   .3327815E-01   .2121297E-01   .8951776E-02  -.8326395E-03
  -.7807416E-02  -.1236325E-01  -.1437157E-01  -.1399085E-01  -.1215204E-01
  -.9994641E-02  -.7918940E-02  -.5854286E-02  -.4042682E-02  -.2772964E-02
  -.1466183E-02   .7783908E-03   .3280935E-02   .3764260E-02   .6586948E-03
  -.5616344E-02  -.1276191E-01  -.1789000E-01  -.1906592E-01  -.1537701E-01
  -.7083700E-02   .4025268E-02   .1484169E-01   .2269644E-01   .2710976E-01
   .2920449E-01   .2966176E-01   .2785613E-01   .2284511E-01   .1481879E-01
   .5753438E-02  -.1786748E-02  -.6264403E-02  -.7332494E-02  -.5496440E-02
  -.1527861E-02   .4151085E-02   .1096564E-01   .1740553E-01   .2164743E-01
   .2253350E-01   .2000498E-01   .1564198E-01   .1238337E-01   .1283887E-01
   .1789252E-01   .2580581E-01   .3279350E-01   .3515032E-01   .3148126E-01
   .2343385E-01   .1465020E-01   .8894226E-02   .7653331E-02   .8573247E-02
   .7283600E-02   .1350890E-02  -.7724619E-02  -.1640769E-01  -.2158959E-01
  -.2177894E-01  -.1780007E-01  -.1255280E-01  -.9354399E-02  -.1032898E-01
  -.1521876E-01  -.2177372E-01  -.2729110E-01  -.2950861E-01  -.2736040E-01
  -.2139192E-01  -.1291302E-01  -.3506497E-02   .5453706E-02   .1293154E-01
   .1771963E-01   .1878736E-01   .1582043E-01   .1015295E-01   .4620597E-02
   .1606243E-02   .1384630E-02   .2606349E-02   .4284757E-02   .6802358E-02
   .1106127E-01   .1728260E-01   .2462372E-01   .3133446E-01   .3508266E-01
   .3436483E-01   .2957585E-01   .2258634E-01   .1549438E-01   .9689190E-02
   .5787436E-02   .3626235E-02   .1857029E-02  -.1275028E-02  -.7317517E-02
  -.1652286E-01  -.2648088E-01  -.3295148E-01  -.3306123E-01  -.2772619E-01
  -.2104928E-01  -.1677828E-01  -.1598578E-01  -.1756693E-01  -.1981854E-01
  -.2180192E-01  -.2291310E-01  -.2188712E-01  -.1747680E-01  -.9564664E-02
   .8665783E-04   .8456786E-02   .1307932E-01   .1333177E-01   .1031758E-01
   .5980839E-02   .1943751E-02  -.1001800E-02  -.2826759E-02  -.3857488E-02
  -.4053478E-02  -.3228687E-02  -.1346870E-02   .1301223E-02   .3998634E-02
   .5743543E-02   .6188098E-02   .6133924E-02   .7122682E-02   .1002600E-01
   .1413538E-01   .1786574E-01   .1892849E-01   .1538286E-01   .7970659E-02
  -.3350941E-03  -.6686531E-02  -.1034471E-01  -.1287664E-01  -.1619768E-01
  -.2095938E-01  -.2636256E-01  -.3020278E-01  -.3014655E-01  -.2589875E-01
  -.1906409E-01  -.1234779E-01  -.8115232E-02  -.6547136E-02  -.5710144E-02
  -.3719727E-02  -.2960809E-03   .3564965E-02   .6491147E-02   .6573175E-02
   .2303257E-02  -.5284729E-02  -.1181394E-01  -.1205981E-01  -.4597280E-02
   .6956687E-02   .1674513E-01   .2015949E-01   .1655879E-01   .9094161E-02
   .2127979E-02  -.1851182E-02  -.3514194E-02  -.5238096E-02  -.8316008E-02
  -.1200695E-01  -.1494056E-01  -.1587639E-01  -.1498701E-01  -.1399523E-01
  -.1486579E-01  -.1786599E-01  -.2140989E-01  -.2313187E-01  -.2137578E-01
  -.1632717E-01  -.9976133E-02  -.4883321E-02  -.2501359E-02  -.2443285E-02
  -.3168688E-02  -.3559540E-02  -.3156634E-02  -.1743208E-02   .8398690E-04
   .1120196E-02   .4534502E-03  -.2041220E-02  -.5948855E-02  -.1059274E-01
  -.1502891E-01  -.1790306E-01  -.1722931E-01  -.1109867E-01  -.1571557E-03
   .1121159E-01   .1760804E-01   .1633876E-01   .8969172E-02  -.3134533E-03
  -.7829082E-02  -.1181390E-01  -.1182836E-01  -.8536683E-02  -.4033270E-02
  -.6608504E-03   .7933568E-03   .8697916E-03   .9842372E-03   .2059770E-02
   .3123005E-02   .2767953E-02   .1408602E-02   .6055127E-03   .1317779E-02
   .3622346E-02   .6741765E-02   .9367650E-02   .1042441E-01   .9645076E-02
   .7215588E-02   .4036163E-02   .1403423E-02   .1012592E-03   .4101095E-03
   .1412731E-02   .1433365E-02  -.1044366E-02  -.6292880E-02  -.1314288E-01
  -.1968374E-01  -.2436292E-01  -.2656967E-01  -.2655073E-01  -.2483545E-01
  -.2169093E-01  -.1670502E-01  -.9909870E-02  -.2322204E-02   .5120004E-02
   .1161488E-01   .1655313E-01   .1936834E-01   .1960222E-01   .1777437E-01
   .1512824E-01   .1322531E-01   .1257052E-01   .1193916E-01   .9927478E-02
   .6200200E-02   .1611943E-02  -.2176555E-02  -.3570806E-02  -.2622430E-02
  -.1170580E-02  -.1215031E-02  -.3431692E-02  -.6958635E-02  -.1053486E-01
  -.1347093E-01  -.1497615E-01  -.1417698E-01  -.1102750E-01  -.6687116E-02
  -.2961808E-02  -.1226407E-02  -.1421784E-02  -.2562135E-02  -.3490072E-02
  -.2691674E-02   .7264609E-03   .6392657E-02   .1263161E-01   .1676491E-01
   .1685378E-01   .1323121E-01   .8637145E-02   .5882936E-02   .5870491E-02
   .7273977E-02   .7806615E-02   .6009362E-02   .1989178E-02  -.2114149E-02
  -.3255253E-02  -.5204151E-03   .4430282E-02   .9519535E-02   .1415159E-01
   .1918020E-01   .2525695E-01   .3132131E-01   .3469161E-01   .3301352E-01
   .2664548E-01   .1854964E-01   .1250143E-01   .1130772E-01   .1518205E-01
   .2183269E-01   .2795376E-01   .3072076E-01   .2887252E-01   .2341492E-01
   .1595621E-01   .7769232E-02   .5776428E-04  -.6650973E-02  -.1282590E-01
  -.1937127E-01  -.2660342E-01  -.3381370E-01  -.3947732E-01  -.4172205E-01
  -.3919722E-01  -.3197305E-01  -.2215189E-01  -.1311858E-01  -.7364383E-02
  -.5257065E-02  -.5342965E-02  -.5600438E-02  -.4513361E-02  -.1754949E-02
   .1797354E-02   .5046967E-02   .7383396E-02   .8897670E-02   .1028348E-01
   .1185243E-01   .1327101E-01   .1398214E-01   .1375478E-01   .1280810E-01
   .1120403E-01   .8893402E-02   .6073484E-02   .3167350E-02   .7773007E-03
  -.2031244E-03   .1117410E-02   .4838222E-02   .9476506E-02   .1237001E-01
   .1164006E-01   .7926807E-02   .3600074E-02   .4689500E-03  -.9511415E-03
  -.1127236E-02  -.1252333E-02  -.2474746E-02  -.4713687E-02  -.6410764E-02
  -.5880824E-02  -.2571163E-02   .2369404E-02   .6257926E-02   .6382998E-02
   .2509026E-02  -.2391692E-02  -.4503806E-02  -.2051248E-02   .4223692E-02
   .1204826E-01   .1845952E-01   .2110136E-01   .1949800E-01   .1524910E-01
   .1098095E-01   .8985376E-02   .9879712E-02   .1246957E-01   .1477613E-01
   .1539866E-01   .1415859E-01   .1166194E-01   .8731547E-02   .5786068E-02
   .3253436E-02   .2289504E-02   .3514966E-02   .6493886E-02   .1020383E-01
   .1335113E-01   .1548615E-01   .1681267E-01   .1727893E-01   .1650061E-01
   .1456341E-01   .1143306E-01   .6688217E-02   .3409108E-03  -.6453703E-02
  -.1187713E-01  -.1434113E-01  -.1312819E-01  -.9162999E-02  -.4348257E-02
  -.5431603E-04   .3388317E-02   .6186247E-02   .8390100E-02   .9675837E-02
   .9999730E-02   .9393937E-02   .7699244E-02   .5136767E-02   .2626567E-02
   .9965469E-03  -.4645631E-03  -.3807867E-02  -.1036671E-01  -.1878082E-01
  -.2529652E-01  -.2623282E-01  -.2128584E-01  -.1439851E-01  -.1045226E-01
  -.1114384E-01  -.1414918E-01  -.1561762E-01  -.1299652E-01  -.6777967E-02
  -.1250195E-03   .3422399E-02   .1777553E-02  -.4306507E-02  -.1190235E-01
  -.1814489E-01  -.2132344E-01  -.2179758E-01  -.2130998E-01  -.2103378E-01
  -.2093999E-01  -.2022101E-01  -.1842752E-01  -.1536072E-01  -.1054592E-01
  -.3800183E-02   .3814316E-02   .1047025E-01   .1494304E-01   .1760097E-01
   .1959266E-01   .2120733E-01   .2143610E-01   .1915510E-01   .1471374E-01
   .1003530E-01   .7115184E-02   .7222534E-02   .1028512E-01   .1485786E-01
   .1899117E-01   .2079282E-01   .1928964E-01   .1543304E-01   .1092423E-01
   .6808726E-02   .3184594E-02  -.3296862E-03  -.4202420E-02  -.8688629E-02
  -.1385555E-01  -.1943861E-01  -.2463245E-01  -.2842005E-01  -.2982259E-01
  -.2813971E-01  -.2378888E-01  -.1857058E-01  -.1437966E-01  -.1181757E-01
  -.1046644E-01  -.9916262E-02  -.1012574E-01  -.1091965E-01  -.1157548E-01
  -.1140299E-01  -.1066375E-01  -.1027564E-01  -.1077048E-01  -.1088251E-01
  -.8781107E-02  -.3992970E-02   .2338629E-02   .8705766E-02   .1448797E-01
   .1991454E-01   .2471562E-01   .2824295E-01   .3002281E-01   .3010351E-01
   .2861074E-01   .2575174E-01   .2241604E-01   .1978584E-01   .1831585E-01
   .1760476E-01   .1732001E-01   .1708480E-01   .1665059E-01   .1604232E-01
   .1504721E-01   .1370737E-01   .1216448E-01   .1074026E-01   .9618341E-02
   .8543221E-02   .7246112E-02   .5731095E-02   .4329165E-02   .3844137E-02
   .5005486E-02   .7501614E-02   .9657055E-02   .9443329E-02   .5815963E-02
  -.9473474E-03  -.9419034E-02  -.1762921E-01  -.2391501E-01  -.2777794E-01
  -.3015693E-01  -.3243882E-01  -.3499678E-01  -.3672008E-01  -.3600177E-01
  -.3230226E-01  -.2688616E-01  -.2189249E-01  -.1855765E-01  -.1663988E-01
  -.1495781E-01  -.1219112E-01  -.7704980E-02  -.1986609E-02   .3390018E-02
   .6662904E-02   .7391377E-02   .6751081E-02   .6288486E-02   .6881608E-02
   .8426768E-02   .9982490E-02   .1056552E-01   .9681658E-02   .7672452E-02
   .5597913E-02   .4412187E-02   .4683075E-02   .6038676E-02   .6584171E-02
   .4490268E-02  -.6403729E-04  -.5413964E-02  -.1012416E-01  -.1370231E-01
  -.1595256E-01  -.1639275E-01  -.1463602E-01  -.1122802E-01  -.7337733E-02
  -.3742388E-02  -.5624103E-03   .2176185E-02   .4219851E-02   .5259086E-02
   .4802806E-02   .3239331E-02   .1707984E-02   .1408499E-02   .3215641E-02
   .7020919E-02   .1141310E-01   .1438417E-01   .1411761E-01   .1060500E-01
   .5599780E-02   .1240068E-02  -.1027249E-02  -.7672786E-03   .1482587E-02
   .3957030E-02   .4691242E-02   .2761705E-02  -.1112949E-02  -.5054135E-02
  -.7704191E-02  -.9250886E-02  -.1047845E-01  -.1174194E-01  -.1278350E-01
  -.1345015E-01  -.1402179E-01  -.1503174E-01  -.1710377E-01  -.1946665E-01
  -.2006767E-01  -.1802039E-01  -.1438788E-01  -.1079559E-01  -.8056324E-02
  -.6327460E-02  -.5585828E-02  -.4919860E-02  -.3009923E-02   .8032792E-03
   .5969051E-02   .1068478E-01   .1282439E-01   .1194050E-01   .9930233E-02
   .8884502E-02   .9262409E-02   .9994442E-02   .9612974E-02   .7496231E-02
   .4409876E-02   .1926504E-02   .1388750E-02   .3294374E-02   .6960095E-02
   .1098249E-01   .1413524E-01   .1530351E-01   .1414399E-01   .1150316E-01
   .8679839E-02   .7027332E-02   .6881631E-02   .7460805E-02   .7826423E-02
   .7653891E-02   .7260092E-02   .7365084E-02   .8617183E-02   .1086491E-01
   .1354820E-01   .1574494E-01   .1615431E-01   .1414773E-01   .1043171E-01
   .6687157E-02   .4096999E-02   .2476384E-02   .1090203E-02  -.8260655E-03
  -.3938971E-02  -.8220396E-02  -.1311379E-01  -.1794319E-01  -.2176985E-01
  -.2373321E-01  -.2343752E-01  -.2131011E-01  -.1852176E-01  -.1615621E-01
  -.1457507E-01  -.1396143E-01  -.1411906E-01  -.1421656E-01  -.1373156E-01
  -.1291875E-01  -.1258279E-01  -.1317784E-01  -.1427182E-01  -.1445373E-01
  -.1310166E-01  -.1079549E-01  -.8583045E-02  -.7764365E-02  -.9276221E-02
  -.1279191E-01  -.1688550E-01  -.1984384E-01  -.2004651E-01  -.1734622E-01
  -.1305694E-01  -.9103424E-02  -.6951507E-02  -.6290691E-02  -.5580539E-02
  -.3418561E-02   .5254792E-03   .5577206E-02   .1068605E-01   .1478580E-01
   .1733698E-01   .1834930E-01   .1844338E-01   .1872408E-01   .2026600E-01
   .2311933E-01   .2613786E-01   .2784175E-01   .2756533E-01   .2551870E-01
   .2252471E-01   .1930118E-01   .1590960E-01   .1211816E-01   .7905990E-02
   .3680288E-02   .3616523E-03  -.9550757E-03  -.1520901E-03   .1130497E-02
   .7706818E-03  -.2043714E-02  -.6175482E-02  -.9928365E-02  -.1230231E-01
  -.1307020E-01  -.1250749E-01  -.1086716E-01  -.8632653E-02  -.6607103E-02
  -.5663127E-02  -.6440253E-02  -.8575796E-02  -.1111477E-01  -.1327956E-01
  -.1481139E-01  -.1511512E-01  -.1345077E-01  -.1009180E-01  -.6132807E-02
  -.2944998E-02  -.1197871E-02  -.3118100E-03   .3216396E-03   .9856632E-03
   .1816324E-02   .2720431E-02   .3557716E-02   .4111328E-02   .4443607E-02
   .5052529E-02   .6426503E-02   .8737097E-02   .1165298E-01   .1433293E-01
   .1582150E-01   .1598357E-01   .1549003E-01   .1464413E-01   .1286069E-01
   .9719557E-02   .5495928E-02   .1421990E-02  -.1436706E-02  -.3048941E-02
  -.3597775E-02  -.3136711E-02  -.1776720E-02   .3089324E-03   .2508408E-02
   .3542846E-02   .2287227E-02  -.1084365E-02  -.5086769E-02  -.8214530E-02
  -.9790890E-02  -.1005610E-01  -.9811196E-02  -.9748521E-02  -.1006741E-01
  -.1085199E-01  -.1243293E-01  -.1452107E-01  -.1573045E-01  -.1477384E-01
  -.1186272E-01  -.8479437E-02  -.6032742E-02  -.4624092E-02  -.3508823E-02
  -.2493879E-02  -.1830086E-02  -.1608121E-02  -.1653605E-02  -.1727818E-02
  -.1659877E-02  -.1152709E-02   .3499480E-03   .3110026E-02   .6915742E-02
   .1105418E-01   .1452499E-01   .1675948E-01   .1819710E-01   .1963763E-01
   .2135352E-01   .2353175E-01   .2602743E-01   .2796125E-01   .2840732E-01
   .2717389E-01   .2419902E-01   .1989780E-01   .1542623E-01   .1163147E-01
   .8962946E-02   .7664560E-02   .7297198E-02   .6696096E-02   .4749607E-02
   .1149851E-02  -.3450922E-02  -.7991642E-02  -.1153248E-01  -.1350064E-01
  -.1377057E-01  -.1288155E-01  -.1124881E-01  -.9025653E-02  -.6508780E-02
  -.4235870E-02  -.2409039E-02  -.5426178E-03   .1649764E-02   .3475549E-02
   .4038713E-02   .2969305E-02   .1154857E-02   .4390052E-03   .2066886E-02
   .5850280E-02   .1045044E-01   .1415393E-01   .1569614E-01   .1488406E-01
   .1224707E-01   .8322409E-02   .3958838E-02   .2842267E-03  -.1854225E-02
  -.2230834E-02  -.1589899E-02  -.1146504E-02  -.1731177E-02  -.3358632E-02
  -.5435280E-02  -.6700393E-02  -.6163878E-02  -.3995193E-02  -.1396552E-02
   .2954661E-03  -.4042218E-04  -.2804121E-02  -.7196697E-02  -.1182290E-01
  -.1565811E-01  -.1861842E-01  -.2051173E-01  -.2071569E-01  -.1951063E-01
  -.1763259E-01  -.1556055E-01  -.1382003E-01  -.1246135E-01  -.1141734E-01
  -.1081284E-01  -.1054896E-01  -.1009337E-01  -.8933902E-02  -.6783201E-02
  -.3513048E-02   .7744708E-03   .5773173E-02   .1093532E-01   .1560529E-01
   .1915911E-01   .2125667E-01   .2183507E-01   .2084055E-01   .1855125E-01
   .1565656E-01   .1282388E-01   .1049963E-01   .8859079E-02   .7896799E-02
   .7495789E-02   .7302405E-02   .6646401E-02   .5294572E-02   .3576611E-02
   .2038143E-02   .1162835E-02   .4470084E-03  -.1138572E-02  -.3783402E-02
  -.6492005E-02  -.8419964E-02  -.9447679E-02  -.9529401E-02  -.8919903E-02
  -.8097371E-02  -.7340870E-02  -.6418147E-02  -.4979889E-02  -.3003548E-02
  -.5290140E-03   .2261370E-02   .4911037E-02   .6735109E-02   .7334382E-02
   .6729458E-02   .5359657E-02   .4034696E-02   .3033824E-02   .2284992E-02
   .1623484E-02   .9184850E-03   .3472647E-03  -.1292444E-03  -.7131512E-03
  -.1405258E-02  -.1900396E-02  -.1587973E-02  -.2998076E-03   .1676952E-02
   .3887902E-02   .5770837E-02   .6887443E-02   .6805916E-02   .5623265E-02
   .4168814E-02   .2958190E-02   .2098996E-02   .1279332E-02   .1017849E-03
  -.1340465E-02  -.2895375E-02  -.4360337E-02  -.5762437E-02  -.6992796E-02
  -.8154705E-02  -.9764309E-02  -.1237000E-01  -.1554316E-01  -.1807793E-01
  -.1926339E-01  -.1939298E-01  -.1894642E-01  -.1814784E-01  -.1666452E-01
  -.1409826E-01  -.1022928E-01  -.5183180E-02   .3356910E-03   .5094165E-02
   .7920834E-02   .8480327E-02   .7285658E-02   .5419493E-02   .4193045E-02
   .4124052E-02   .4704109E-02   .5133620E-02   .5082057E-02   .4928185E-02
   .5338249E-02   .6390228E-02   .7388721E-02   .7548143E-02   .6489638E-02
   .4751364E-02   .2883478E-02   .1194583E-02   .9988034E-05  -.1637708E-03
   .6894140E-03   .1739440E-02   .2184190E-02   .1946519E-02   .1294513E-02
   .2234283E-03  -.1085073E-02  -.2489123E-02  -.3601713E-02  -.4160934E-02
  -.4402791E-02  -.4362011E-02  -.4113105E-02  -.3927751E-02  -.4162766E-02
  -.5191527E-02  -.6750034E-02  -.8639092E-02  -.1084836E-01  -.1301216E-01
  -.1462379E-01  -.1514128E-01  -.1395008E-01  -.1093304E-01  -.6955846E-02
  -.3399222E-02  -.1582411E-02  -.2303354E-02  -.5449258E-02  -.1015789E-01
  -.1501879E-01  -.1847757E-01  -.1971781E-01  -.1895905E-01  -.1685258E-01
  -.1383747E-01  -.1025266E-01  -.6734562E-02  -.4120379E-02  -.2979712E-02
  -.3393287E-02  -.4963958E-02  -.6496982E-02  -.6601512E-02  -.4710495E-02
  -.1247933E-02   .2487364E-02   .4878452E-02   .5277736E-02   .4372305E-02
   .3812373E-02   .4952772E-02   .7633268E-02   .1096178E-01   .1388429E-01
   .1562240E-01   .1582120E-01   .1441305E-01   .1160411E-01   .8095269E-02
   .4793912E-02   .2140296E-02   .3506858E-03  -.4466433E-03  -.5863041E-03
  -.7347020E-03  -.1031425E-02  -.1123864E-02  -.9571777E-03  -.7489806E-03
  -.7681319E-03  -.1427113E-02  -.2742243E-02  -.4229746E-02  -.4910187E-02
  -.3756737E-02  -.1014899E-02   .1703109E-02   .2908277E-02   .2491434E-02
   .1010322E-02  -.1054526E-02  -.2944984E-02  -.4025632E-02  -.4131061E-02
  -.3487283E-02  -.2369510E-02  -.1066155E-02   .3013486E-03   .2292022E-02
   .5458481E-02   .9013653E-02   .1126481E-01   .1162622E-01   .1097097E-01
   .1047099E-01   .1062656E-01   .1135271E-01   .1230167E-01   .1307254E-01
   .1319184E-01   .1230343E-01   .1069666E-01   .8603923E-02   .6561389E-02
   .5412715E-02   .5374801E-02   .6233379E-02   .7561437E-02   .8545430E-02
   .8928759E-02   .8922921E-02   .8570147E-02   .7777076E-02   .6571130E-02
   .5582052E-02   .5262897E-02   .5451955E-02   .5673750E-02   .5443679E-02
   .4322662E-02   .2001374E-02  -.1358979E-02  -.4942621E-02  -.7725884E-02
  -.8971769E-02  -.8618745E-02  -.7200617E-02  -.5606578E-02  -.4279642E-02
  -.3343582E-02  -.2513364E-02  -.1575092E-02  -.7806801E-03  -.4104751E-03
  -.4185562E-03  -.5243924E-03  -.3545830E-03   .4587074E-03   .2024645E-02
   .4001958E-02   .5782581E-02   .7187835E-02   .8056667E-02   .8342525E-02
   .8291529E-02   .8223637E-02   .8275695E-02   .8379218E-02   .8407238E-02
   .8031055E-02   .6822095E-02   .5019629E-02   .3121783E-02   .1352394E-02
   .2300162E-03   .3427120E-03   .1512810E-02   .2928909E-02   .4206940E-02
   .5087144E-02   .5380027E-02   .5033287E-02   .3764686E-02   .1581711E-02
  -.8071777E-03  -.2783281E-02  -.4395851E-02  -.5661669E-02  -.6502769E-02
  -.6702229E-02  -.6403051E-02  -.6082122E-02  -.6034414E-02  -.6198986E-02
  -.6359693E-02  -.6386987E-02  -.6307648E-02  -.6222573E-02  -.6197236E-02
  -.6223909E-02  -.6238127E-02  -.5999514E-02  -.5084032E-02  -.3610789E-02
  -.1524621E-02   .1262246E-02   .4310789E-02   .6816426E-02   .8108809E-02
   .8095958E-02   .6876717E-02   .4792584E-02   .2750168E-02   .1129299E-02
  -.3033879E-03  -.1690518E-02  -.2780790E-02  -.3279780E-02  -.3121600E-02
  -.2047829E-02   .1117059E-03   .2774265E-02   .4447339E-02   .4205433E-02
   .2773694E-02   .1316388E-02   .3954264E-03   .3062078E-03   .9201904E-03
   .1830130E-02   .2613436E-02   .3177085E-02   .3500822E-02   .3340880E-02
   .2643184E-02   .1270150E-02  -.7933247E-03  -.2800415E-02  -.4148125E-02
  -.4988167E-02  -.5423603E-02  -.5043373E-02  -.4018671E-02  -.3183586E-02
  -.3015539E-02  -.3317839E-02  -.3716565E-02  -.4357913E-02  -.5350686E-02
  -.6215257E-02  -.6640577E-02  -.7121533E-02  -.8035806E-02  -.8940995E-02
  -.9348116E-02  -.9262533E-02  -.8976659E-02  -.8533598E-02  -.7758862E-02
  -.6941456E-02  -.6970027E-02  -.8142810E-02  -.9952320E-02  -.1164318E-01
  -.1264764E-01  -.1269109E-01  -.1147906E-01  -.9033355E-02  -.5780739E-02
  -.2537116E-02   .1348901E-04   .1657222E-02   .2628844E-02   .3524311E-02
   .4523883E-02   .5277733E-02   .5441121E-02   .4680940E-02   .3002908E-02
   .1017338E-02  -.6753425E-03  -.1917641E-02  -.2730160E-02  -.3109983E-02
  -.3138965E-02  -.2871516E-02  -.2645723E-02  -.2932481E-02  -.3976851E-02
  -.5527841E-02  -.7146826E-02  -.8569129E-02  -.9746447E-02  -.1032159E-01
  -.9848672E-02  -.8466113E-02  -.6784982E-02  -.5287356E-02  -.4143651E-02
  -.3552964E-02  -.3461728E-02  -.3559016E-02  -.3521406E-02  -.3040899E-02
  -.2012345E-02  -.8777186E-03  -.1465559E-03   .4785941E-03   .1384062E-02
   .2243001E-02   .2650755E-02   .2669821E-02   .2844953E-02   .3649063E-02
   .4787554E-02   .5445538E-02   .4820717E-02   .2654729E-02  -.3552145E-03
  -.2813575E-02  -.3634150E-02  -.2638808E-02  -.5429841E-03   .1475274E-02
   .2560892E-02   .2619938E-02   .2129746E-02   .1291465E-02   .3093441E-03
  -.1425576E-03   .4365687E-04   .4250051E-03   .5358418E-03   .2624746E-03
   .3621073E-03   .1319475E-02   .2692606E-02   .3821667E-02   .4506191E-02
   .4924906E-02   .5122276E-02   .4920642E-02   .4313331E-02   .3509051E-02
   .2774486E-02   .2305061E-02   .1698103E-02   .6738018E-03  -.3353334E-03
  -.1098303E-02  -.1929165E-02  -.3120960E-02  -.4579549E-02  -.5815449E-02
  -.6376692E-02  -.6288494E-02  -.5717578E-02  -.4762397E-02  -.3786776E-02
  -.3165235E-02  -.2560148E-02  -.1631239E-02  -.7534404E-03  -.3602078E-03
  -.5277447E-03  -.1335853E-02  -.2540255E-02  -.3309732E-02  -.2752098E-02
  -.5309041E-03   .2870048E-02   .6334250E-02   .8943599E-02   .1041418E-01
   .1086775E-01   .1070915E-01   .1004583E-01   .8945799E-02   .7567672E-02
   .6155535E-02   .4984349E-02   .3968026E-02   .3002072E-02   .1816596E-02
   .1630317E-03  -.1709818E-02  -.3408623E-02  -.4667350E-02  -.4979476E-02
  -.4185914E-02  -.2876033E-02  -.1721714E-02  -.1563844E-02  -.2821186E-02
  -.4899055E-02  -.7032756E-02  -.8658420E-02  -.9652213E-02  -.1045807E-01
  -.1129569E-01  -.1183487E-01  -.1145941E-01  -.1012627E-01  -.8277539E-02
  -.6105340E-02  -.3883162E-02  -.2053002E-02  -.9624014E-03  -.6353475E-03
  -.7130462E-03  -.7300587E-03  -.2510220E-03   .9558598E-03   .2837045E-02
   .4996058E-02   .6845321E-02   .7941682E-02   .8225038E-02   .8022455E-02
   .7532324E-02   .6725503E-02   .5753723E-02   .4641589E-02   .3514242E-02
   .3057552E-02   .3714321E-02   .4988876E-02   .6157334E-02   .7060932E-02
   .7627589E-02   .7355042E-02   .6145359E-02   .4477547E-02   .2990275E-02
   .2170605E-02   .1591856E-02   .6370092E-03  -.7972084E-03  -.2151874E-02
  -.2877678E-02  -.3111053E-02  -.3155012E-02  -.3201092E-02  -.3293713E-02
  -.3393546E-02  -.3494206E-02  -.3735110E-02  -.3959000E-02  -.3798378E-02
  -.3102990E-02  -.1968496E-02  -.8806909E-03  -.3420252E-03  -.2742544E-03
   .1089652E-03   .1169612E-02   .2278501E-02   .2895340E-02   .3407283E-02
   .4257795E-02   .5114540E-02   .5533529E-02   .5495099E-02   .5292175E-02
   .5095104E-02   .4543666E-02   .3403468E-02   .1839675E-02   .2651166E-03
  -.8992579E-03  -.1768525E-02  -.2556740E-02  -.3133933E-02  -.3317438E-02
  -.2800019E-02  -.1351147E-02   .5615302E-03   .2093467E-02   .2678777E-02
   .2476206E-02   .1874619E-02   .9925066E-03   .3112173E-05  -.1038268E-02
  -.2212352E-02  -.3125609E-02  -.3437394E-02  -.3072408E-02  -.2101442E-02
  -.9318844E-03   .1871518E-03   .1343434E-02   .2446077E-02   .3559262E-02
   .4613638E-02   .5282383E-02   .5444956E-02   .5273622E-02   .4693555E-02
   .3618761E-02   .2624241E-02   .2233098E-02   .2393663E-02   .2668531E-02
   .2719341E-02   .2534169E-02   .2101714E-02   .1221989E-02  -.1091479E-03
  -.1617992E-02  -.2847173E-02  -.3377469E-02  -.3071778E-02  -.2047842E-02
  -.8862530E-03  -.4913372E-03  -.1304476E-02  -.2714985E-02  -.3655578E-02
  -.3686243E-02  -.3034602E-02  -.2375014E-02  -.2401754E-02  -.2953239E-02
  -.3424741E-02  -.3492245E-02  -.3272916E-02  -.3003718E-02  -.2465848E-02
  -.1353368E-02   .1757984E-03   .1822083E-02   .3310031E-02   .4630367E-02
   .5514728E-02   .5847627E-02   .6004999E-02   .6229993E-02   .6214821E-02
   .5557953E-02   .4253684E-02   .3096351E-02   .2708716E-02   .2969352E-02
   .3349894E-02   .3478700E-02   .3345854E-02   .3155966E-02   .3093178E-02
   .3181584E-02   .3310557E-02   .3374547E-02   .3358316E-02   .3326370E-02
   .3321297E-02   .3113105E-02   .2342383E-02   .1170434E-02  -.1018232E-03
  -.1353258E-02  -.2202420E-02  -.2677406E-02  -.3330728E-02  -.4307417E-02
  -.5137717E-02  -.5614341E-02  -.5789067E-02  -.5743193E-02  -.5658202E-02
  -.5445000E-02  -.5169368E-02  -.4995691E-02  -.4980255E-02  -.5026642E-02
  -.5001970E-02  -.4517478E-02  -.3379485E-02  -.2261050E-02  -.1788029E-02
  -.1933279E-02  -.2272989E-02  -.2654441E-02  -.3302600E-02  -.3985173E-02
  -.4099102E-02  -.3486134E-02  -.2498338E-02  -.1777091E-02  -.1418722E-02
  -.8968079E-03  -.1645141E-04   .7764787E-03   .1088653E-02   .9479229E-03
   .5159320E-03   .1387519E-03   .2872593E-03   .1008591E-02   .2096409E-02
   .2763246E-02   .2271317E-02   .1116117E-02  -.1010271E-03  -.1226534E-02
  -.1958875E-02  -.2367121E-02  -.3004794E-02  -.3976094E-02  -.4552735E-02
  -.3990943E-02  -.2249491E-02  -.1419598E-03   .1139079E-02   .1235193E-02
   .7350003E-03   .3929147E-03   .4753708E-03   .8099711E-03   .1300704E-02
   .2105725E-02   .3080161E-02   .3731923E-02   .3801280E-02   .3155551E-02
   .1928668E-02   .8414814E-03   .5564198E-04  -.8560174E-03  -.2131046E-02
  -.3667327E-02  -.4798922E-02  -.5149399E-02  -.4961714E-02  -.4723174E-02
  -.4712668E-02  -.4886256E-02  -.5053003E-02  -.5080503E-02  -.4980651E-02
  -.4866145E-02  -.4820588E-02  -.4831269E-02  -.4838269E-02  -.4820029E-02
  -.4795093E-02  -.4810976E-02  -.5083930E-02  -.5875679E-02  -.6740464E-02
  -.6719551E-02  -.5679076E-02  -.4156636E-02  -.2672280E-02  -.1800910E-02
  -.1519219E-02  -.1496592E-02  -.1677654E-02  -.1894199E-02  -.1947205E-02
  -.1651016E-02  -.1007286E-02  -.4128926E-03  -.2194599E-03  -.5459790E-03
  -.1033826E-02  -.8542220E-03   .1199405E-03   .1145578E-02   .1874589E-02
   .2630505E-02   .3221934E-02   .3034505E-02   .2035067E-02   .6980757E-03
  -.6767195E-03  -.1643809E-02  -.1947568E-02  -.1819853E-02  -.1794188E-02
  -.2110621E-02  -.2336013E-02  -.2181442E-02  -.1546241E-02  -.5076748E-03
   .3007124E-03   .3747900E-03  -.4978315E-03  -.1653493E-02  -.2257268E-02
  -.2130330E-02  -.1540700E-02  -.6456458E-03   .3489073E-03   .1073812E-02
   .1614300E-02   .2464320E-02   .3449953E-02   .4050107E-02   .4129434E-02
   .3954983E-02   .3837560E-02   .3885778E-02   .4034127E-02   .4316159E-02
   .4982868E-02   .5995747E-02   .6833785E-02   .7117165E-02   .6967054E-02
   .6764495E-02   .6911690E-02   .7682188E-02   .8546098E-02   .8477731E-02
   .7547813E-02   .6520135E-02   .5802644E-02   .5348165E-02   .4869239E-02
   .4362253E-02   .3878933E-02   .3310380E-02   .2633372E-02   .1875864E-02
   .1252233E-02   .6726649E-03  -.2453376E-03  -.1244562E-02  -.1823165E-02
  -.1859693E-02  -.1628760E-02  -.1465428E-02  -.1497515E-02  -.1637631E-02
  -.1758134E-02  -.1945303E-02  -.2384901E-02  -.2867631E-02  -.2946034E-02
  -.2410516E-02  -.1687629E-02  -.1289620E-02  -.1159128E-02  -.7129923E-03
   .3005783E-03   .1641543E-02   .3095106E-02   .4307664E-02   .4996386E-02
   .5087901E-02   .4939175E-02   .4708856E-02   .4511407E-02   .4460576E-02
   .4515277E-02   .4428903E-02   .3950012E-02   .3206179E-02   .2384607E-02
   .1648620E-02   .8911641E-03   .5823328E-04  -.4652698E-03  -.7248871E-03
  -.1146327E-02  -.2171396E-02  -.3345037E-02  -.3819306E-02  -.3726025E-02
  -.3628155E-02  -.3726056E-02  -.3697444E-02  -.2952836E-02  -.1750250E-02
  -.9207185E-03  -.1031562E-02  -.2200742E-02  -.3630882E-02  -.4363277E-02
  -.4241766E-02  -.3790417E-02  -.3457403E-02  -.3142604E-02  -.2676958E-02
  -.1987890E-02  -.1316818E-02  -.9727514E-03  -.9561276E-03  -.8406367E-03
   .3904229E-06   .1399368E-02   .2724864E-02   .3339970E-02   .2960335E-02
   .2117072E-02   .1592175E-02   .1645831E-02   .1987043E-02   .2222424E-02
   .2271213E-02   .2405673E-02   .2500196E-02   .2271669E-02   .1624585E-02
   .7748696E-03  -.1965219E-03  -.1557003E-02  -.3027353E-02  -.4057462E-02
  -.4811543E-02  -.5370448E-02  -.5727340E-02  -.5817367E-02  -.5722954E-02
  -.5222991E-02  -.4341049E-02  -.3623690E-02  -.3410620E-02  -.3419090E-02
  -.2870411E-02  -.1786786E-02  -.1149617E-02  -.1331178E-02  -.1592114E-02
  -.1359260E-02  -.8251029E-03  -.3467344E-03   .1214508E-03   .6681852E-03
   .1348966E-02   .2028313E-02   .2520243E-02   .3017021E-02   .3741148E-02
   .4515790E-02   .4709988E-02   .3962725E-02   .2836082E-02   .2169628E-02
   .2216923E-02   .2607567E-02   .2860544E-02   .2793435E-02   .2550247E-02
   .2326143E-02   .1959524E-02   .1159941E-02   .1738333E-03  -.4587839E-03
  -.6426529E-03  -.1028096E-02  -.1997179E-02  -.3010379E-02  -.3489993E-02
  -.3412888E-02  -.3154954E-02  -.3055905E-02  -.3156826E-02  -.3206344E-02
  -.2650666E-02  -.1452534E-02  -.3863091E-03  -.3092923E-04  -.2704414E-03
  -.6029270E-03  -.6684980E-03  -.4748952E-03  -.2507671E-03  -.1698359E-03
  -.2314091E-03  -.3314670E-03  -.4273326E-03  -.6736254E-03  -.9834846E-03
  -.1263778E-02  -.1760228E-02  -.2296974E-02  -.2577838E-02  -.2461667E-02
  -.1790826E-02  -.8638977E-03  -.2579230E-03  -.1393456E-03  -.4618959E-04
   .4484987E-03   .1324171E-02   .2222919E-02   .2712539E-02   .2726866E-02
   .2580474E-02   .2710596E-02   .3022242E-02   .3077265E-02   .2887940E-02
   .2869712E-02   .3037930E-02   .3028694E-02   .2803874E-02   .2575906E-02
   .2443087E-02   .2125834E-02   .1292888E-02   .2136001E-03  -.4916971E-03
  -.5886199E-03  -.3501951E-03  -.1646794E-03  -.1941899E-03  -.3494413E-03
  -.4678120E-03  -.4675932E-03  -.2879589E-03   .4077568E-03   .1605573E-02
   .2599178E-02   .2902038E-02   .2678299E-02   .2393923E-02   .2328570E-02
   .2450441E-02   .2607120E-02   .2712653E-02   .2903582E-02   .3155781E-02
   .3116099E-02   .2812182E-02   .2543373E-02   .2487165E-02   .2587952E-02
   .2692676E-02   .2711590E-02   .2661543E-02   .2606994E-02   .2591843E-02
   .2611910E-02   .2637897E-02   .2648846E-02   .2659348E-02   .2888555E-02
   .3665970E-02   .4795876E-02   .5661810E-02   .6251157E-02   .6642501E-02
   .6376266E-02   .5467065E-02   .4211440E-02   .3066710E-02   .2315459E-02
   .2024588E-02   .2255872E-02   .2659630E-02   .2870675E-02   .3042440E-02
   .3640846E-02   .4631520E-02   .5431148E-02   .5683648E-02   .5546694E-02
   .5372160E-02   .5359820E-02   .5452588E-02   .5323882E-02   .4756672E-02
   .3918926E-02   .3096254E-02   .2630487E-02   .2612776E-02   .2969985E-02
   .3369866E-02   .3314617E-02   .2876003E-02   .2468031E-02   .2331311E-02
   .2242724E-02   .2048344E-02   .1879895E-02   .1503129E-02   .1064109E-02
   .1293997E-02   .2119506E-02   .2826364E-02   .2989332E-02   .2757196E-02
   .2526871E-02   .2643164E-02   .3064918E-02   .3237376E-02   .2977935E-02
   .2597121E-02   .2413994E-02   .2472152E-02   .2614243E-02   .2688260E-02
   .2672353E-02   .2639836E-02   .2657942E-02   .2843282E-02   .3180203E-02
   .3301818E-02   .3398547E-02   .4038048E-02   .4819458E-02   .4785786E-02
   .3773237E-02   .2601255E-02   .1765028E-02   .9758044E-03   .2614723E-03
   .1602113E-03   .9098690E-03   .1820794E-02   .2406414E-02   .2601378E-02
   .2575640E-02   .2534032E-02   .2556610E-02   .2484696E-02   .2234733E-02
   .2176088E-02   .2407022E-02   .2503994E-02   .1924887E-02   .7554938E-03
  -.2761464E-03  -.7795229E-03  -.1020882E-02  -.1098751E-02  -.8418857E-03
  -.4178359E-03  -.1549191E-03  -.1530719E-03  -.2586468E-03  -.3113126E-03
  -.2882727E-03  -.2345372E-03  -.9663836E-04   .2223712E-03   .3693839E-03
   .2495671E-03   .2332110E-03   .3315921E-03   .4830768E-03   .4159745E-03
   .7535937E-04  -.2619506E-03  -.3785835E-03  -.3006659E-03  -.1892094E-03
  -.1790261E-03  -.4775960E-03  -.1433628E-02  -.2774143E-02  -.4058443E-02
  -.5114970E-02  -.5775032E-02  -.5981066E-02  -.5915568E-02  -.5754775E-02
  -.5325645E-02  -.4456281E-02  -.3512377E-02  -.3004381E-02  -.3012608E-02
  -.3230514E-02  -.3342919E-02  -.3269825E-02  -.3124380E-02  -.3033752E-02
  -.3020470E-02  -.3038624E-02  -.3041225E-02  -.2885973E-02  -.2132184E-02
  -.9489985E-03  -.9037551E-04   .7069689E-04  -.2042134E-03  -.4535564E-03
  -.4501781E-03  -.2754470E-03  -.1222126E-03  -.9493162E-04  -.1608186E-03
  -.2312504E-03  -.2509849E-03  -.2333768E-03  -.3090216E-03  -.8913729E-03
  -.2006836E-02  -.2978945E-02  -.3409216E-02  -.3845976E-02  -.4808193E-02
  -.6070244E-02  -.7150515E-02  -.7841243E-02  -.8099415E-02  -.8024602E-02
  -.7531044E-02  -.6338398E-02  -.4715797E-02  -.3383702E-02  -.2867585E-02
  -.3027932E-02  -.3316268E-02  -.3346182E-02  -.3134486E-02  -.2907168E-02
  -.2783736E-02  -.2599287E-02  -.2413996E-02  -.2519798E-02  -.2834377E-02
  -.3071191E-02  -.3093871E-02  -.2961533E-02  -.2664068E-02  -.2302372E-02
  -.1930016E-02  -.1447964E-02  -.1225328E-02  -.1338822E-02  -.1354533E-02
  -.9214880E-03  -.2807668E-03   .3407310E-03   .9288917E-03   .1304867E-02
   .1183031E-02   .5504083E-03  -.1000531E-03  -.3616451E-03  -.2506434E-03
  -.4680193E-04   .2539667E-04  -.5478163E-04  -.1726078E-03  -.2266103E-03
  -.2024114E-03  -.1503931E-03  -.1205558E-03  -.1259002E-03  -.1467184E-03
  -.1631027E-03  -.1897226E-03  -.4118596E-03  -.9628714E-03  -.1678936E-02
  -.1997838E-02  -.1381533E-02  -.3130211E-03   .7705222E-03   .1863587E-02
   .2653313E-02   .2912307E-02   .2805401E-02   .2664915E-02   .2678539E-02
   .2809046E-02   .2925832E-02   .2951189E-02   .2904904E-02   .2851948E-02
   .2835592E-02   .2853442E-02   .2878542E-02   .2889236E-02   .2884214E-02
   .2874362E-02   .2868134E-02   .2849689E-02   .2666682E-02   .2156039E-02
   .1569094E-02   .1278502E-02   .1489797E-02   .2151445E-02   .2801276E-02
   .3051410E-02   .2918529E-02   .2702252E-02   .2651967E-02   .2773540E-02
   .2920352E-02   .2977065E-02   .2942037E-02   .2878137E-02   .2808338E-02
   .2445193E-02   .1444765E-02   .2824498E-03  -.3415032E-03  -.3027509E-03
   .4999975E-05   .1708116E-03   .8749280E-04  -.9742733E-04  -.2073282E-03
  -.1905039E-03  -.1111585E-03  -.5423322E-04  -.5259260E-04  -.8192091E-04
  -.8644126E-04   .1014076E-03   .6510829E-03   .1442336E-02   .2271400E-02
   .2832005E-02   .2980731E-02   .2872884E-02   .2763384E-02   .2779425E-02
   .2880492E-02   .2946902E-02   .2795332E-02   .2432698E-02   .2319431E-02
   .2587767E-02   .2938651E-02   .3089832E-02   .3022584E-02   .2892123E-02
   .2834827E-02   .2871708E-02   .2939138E-02   .2977999E-02   .3001367E-02
   .3182162E-02   .3663981E-02   .4050556E-02   .3848775E-02   .3259424E-02
   .2813744E-02   .2765793E-02   .2963199E-02   .3144918E-02   .3176683E-02
   .3094658E-02   .3008065E-02   .2986617E-02   .3021480E-02   .3061715E-02
   .3037703E-02   .2663014E-02   .1650768E-02   .5041722E-03  -.9301641E-04
  -.5539427E-04   .8495927E-04  -.1061886E-03  -.4902101E-03  -.1118799E-02
  -.1973752E-02  -.2481795E-02  -.2015943E-02  -.7876373E-03   .2783927E-03
   .5784940E-03   .2832780E-03  -.8730360E-04  -.3125251E-03  -.4375429E-03
  -.3047235E-03   .2276799E-04   .2741405E-03   .3033292E-03   .1360961E-03
  -.4528293E-03  -.1603363E-02  -.2676866E-02  -.3092397E-02  -.2904883E-02
  -.2565446E-02  -.2439880E-02  -.2562796E-02  -.2751732E-02  -.2863164E-02
  -.3039013E-02  -.3303862E-02  -.3451859E-02  -.3437532E-02  -.3177593E-02
  -.3014964E-02  -.3155098E-02  -.3410991E-02  -.3781768E-02  -.4321697E-02
  -.5007727E-02  -.5531616E-02  -.5689845E-02  -.5573881E-02  -.5414072E-02
  -.5369122E-02  -.5438035E-02  -.5525017E-02  -.5555330E-02  -.5526986E-02
  -.5483519E-02  -.5462684E-02  -.5467156E-02  -.5452398E-02  -.5185379E-02
  -.4363370E-02  -.3213699E-02  -.2374962E-02  -.1959243E-02  -.1437778E-02
  -.6045706E-03  -.2345257E-04  -.9230023E-06  -.6340753E-04   .7995968E-04
   .3039846E-03   .2337897E-03  -.3335662E-03  -.1200300E-02  -.2046352E-02
  -.2512165E-02  -.2513198E-02  -.2114632E-02  -.1454354E-02  -.7343080E-03
  -.6213030E-04   .3551904E-03   .4487564E-03   .3675034E-03   .3070331E-03
   .3471585E-03   .4756732E-03   .7758504E-03   .1130003E-02   .1287561E-02
   .1251321E-02   .9590303E-03   .6043706E-03   .4171568E-03   .4344793E-03
   .5341607E-03   .5758173E-03   .5416950E-03   .4864530E-03   .4187979E-03
   .1613558E-03  -.4017288E-03  -.9505411E-03  -.1137837E-02  -.7942654E-03
  -.6778131E-04   .5299846E-03   .6833892E-03   .5348911E-03   .5573539E-03
   .8562158E-03   .9594942E-03   .7443646E-03   .4630016E-03   .3450987E-03
   .4270446E-03   .7598767E-03   .1339780E-02   .1866816E-02   .2253031E-02
   .2479578E-02   .2330803E-02   .1944788E-02   .1488737E-02   .1166610E-02
   .1280783E-02   .1486885E-02   .1425384E-02   .1201457E-02   .1002951E-02
   .9527336E-03   .8133281E-03   .5660144E-03   .3906031E-03   .5002855E-03
   .8569960E-03   .9792131E-03   .7111380E-03   .3412247E-03   .1710812E-03
   .2424488E-03   .5678743E-03   .1321767E-02   .2389601E-02   .3215943E-02
   .3447471E-02   .3270682E-02   .3088186E-02   .3112465E-02   .3264606E-02
   .3378006E-02   .3345537E-02   .2920794E-02   .1872615E-02   .7430441E-03
   .3404668E-03   .9141663E-03   .1951263E-02   .2862479E-02   .3118360E-02
   .2423932E-02   .1172186E-02   .2279539E-03   .4494765E-04   .3658406E-03
   .6624178E-03   .6303857E-03   .2428403E-03  -.2649839E-03  -.3749213E-03
  -.3189976E-04   .3718443E-03   .5216763E-03   .4200872E-03   .2614333E-03
   .2001031E-03   .2492573E-03   .3293136E-03   .3679442E-03   .3538239E-03
   .3191670E-03   .2884838E-03   .2595018E-03   .2365228E-03   .2265098E-03
   .2283692E-03   .2338497E-03   .2465849E-03   .3626956E-03   .6990335E-03
   .9891097E-03   .1322215E-02   .1997723E-02   .2787420E-02   .3244547E-02
   .3260575E-02   .3076378E-02   .2971071E-02   .3027771E-02   .3025693E-02
   .2534518E-02   .1481381E-02   .4488896E-03  -.1315870E-04  -.3729211E-04
  -.3281578E-03  -.1153169E-02  -.1905913E-02  -.2204884E-02  -.2059439E-02
  -.1935065E-02  -.1917919E-02  -.1498303E-02  -.8573930E-03  -.3907754E-03
  -.3325073E-03  -.3337467E-03  -.9843893E-04   .2374859E-03   .4389994E-03
   .4436780E-03   .3520413E-03   .2891557E-03   .2989867E-03   .3488942E-03
   .3862854E-03   .3904414E-03   .3796142E-03   .4386357E-03   .7175685E-03
   .9219621E-03   .7490175E-03   .3771964E-03   .1415972E-03   .1731069E-03
   .3464891E-03   .4626482E-03   .3705255E-03  -.1025567E-03  -.7915522E-03
  -.1352334E-02  -.1812268E-02  -.2241300E-02  -.2531522E-02  -.2623632E-02
  -.2600653E-02  -.2648932E-02  -.2979936E-02  -.3337357E-02  -.3601560E-02
  -.3860662E-02  -.4061956E-02  -.4070147E-02  -.3749278E-02  -.3404835E-02
  -.3163840E-02  -.2920779E-02  -.2707564E-02  -.2597250E-02  -.2586082E-02
  -.2611516E-02  -.2624761E-02  -.2629165E-02  -.2633643E-02  -.2652624E-02
  -.2689305E-02  -.2720808E-02  -.2726593E-02  -.2709343E-02  -.2677767E-02
  -.2549103E-02  -.1915119E-02  -.7434103E-03   .2158782E-03   .2833815E-03
  -.3046446E-03  -.1120517E-02  -.2002568E-02  -.2606301E-02  -.2737249E-02
  -.2565744E-02  -.2417735E-02  -.2459039E-02  -.2617140E-02  -.2740876E-02
  -.2713528E-02  -.2367220E-02  -.1804074E-02  -.1613571E-02  -.2048235E-02
  -.2637466E-02  -.2871537E-02  -.2663012E-02  -.2151473E-02  -.1737132E-02
  -.1656891E-02  -.1790059E-02  -.1642081E-02  -.8831894E-03  -.3862770E-05
   .4262370E-03   .3466777E-03   .5121703E-04  -.3344997E-03  -.8352181E-03
  -.1452549E-02  -.2107885E-02  -.2513895E-02  -.2344969E-02  -.1446726E-02
  -.2470350E-03   .5142396E-03   .5817385E-03   .2887827E-03   .4045586E-04
  -.3605949E-03  -.1260436E-02  -.2222702E-02  -.2704495E-02  -.2672886E-02
  -.2484502E-02  -.2448897E-02  -.2587625E-02  -.2741122E-02  -.2783871E-02
  -.2718705E-02  -.2629748E-02  -.2575692E-02  -.2553852E-02  -.2546413E-02
  -.2535491E-02  -.2469795E-02  -.1988196E-02  -.8875057E-03   .1887137E-03
   .6233872E-03   .4542826E-03   .1361543E-03   .1341189E-04   .1022204E-03
   .2410398E-03   .2981807E-03   .2597142E-03   .1917522E-03   .1600694E-03
   .1889087E-03   .2600729E-03   .3257625E-03   .3517478E-03   .3459453E-03
   .3386467E-03   .3509124E-03   .3731640E-03   .3889173E-03   .5230978E-03
   .8056154E-03   .8432587E-03   .5445078E-03   .1921069E-03  -.9672192E-04
  -.4961687E-03  -.1086860E-02  -.1834198E-02  -.2442644E-02  -.2650021E-02
  -.2389580E-02  -.1914302E-02  -.1805637E-02  -.2165085E-02  -.2596125E-02
  -.2674659E-02  -.2279351E-02  -.1748089E-02  -.1029926E-02  -.3200472E-03
  -.1127221E-03  -.1843630E-03  -.1157690E-03   .1256358E-03   .3526652E-03
   .4378889E-03   .4072877E-03   .3657498E-03   .3901173E-03   .4571285E-03
   .4918828E-03   .4595893E-03   .3940060E-03   .3686605E-03   .5302796E-03
   .1082537E-02   .1822993E-02   .2424064E-02   .2955189E-02   .3423159E-02
   .3586555E-02   .3077511E-02   .1900507E-02   .8216060E-03   .3184541E-03
   .5310516E-03   .1365004E-02   .2044140E-02   .1918382E-02   .1003266E-02
  -.4628232E-04  -.5353654E-03  -.3684162E-03   .6537775E-04   .3928418E-03
   .5419188E-03   .6222635E-03   .6982944E-03   .7842731E-03   .9767183E-03
   .1045615E-02   .8960448E-03   .6041340E-03   .2019470E-03  -.8634107E-04
  -.8278663E-04   .1305385E-03   .3303705E-03   .3940825E-03   .3456628E-03
   .2771662E-03   .2634255E-03   .3222167E-03   .4243301E-03   .5081517E-03
   .5427805E-03   .6417188E-03   .6398430E-03   .2806065E-03  -.1905197E-03
  -.3234183E-03   .1618731E-03   .9141657E-03   .1198808E-02   .8974266E-03
   .3993168E-03   .7243220E-04   .2078938E-04   .1482853E-03   .3191883E-03
   .4548636E-03   .5313519E-03   .5462318E-03   .4954904E-03   .3788007E-03
   .2162210E-03   .5309290E-04  -.5579245E-04  -.7016045E-04   .1966275E-04
   .1927684E-03   .3928943E-03   .5588413E-03   .6591042E-03   .6704506E-03
   .5775207E-03   .3947787E-03   .1720906E-03  -.1698240E-04  -.1039221E-03
  -.6260141E-04   .9322358E-04   .3080429E-03   .4965916E-03   .5929228E-03
   .5801507E-03   .4841619E-03   .3539477E-03   .2419072E-03   .1815415E-03
   .1803932E-03   .2296247E-03   .3036741E-03   .3398941E-03   .2868120E-03
   .1579124E-03   .2052706E-04  -.5265874E-04  -.3789276E-04   .2344732E-04
   .6560197E-04   .7935022E-04   .1143117E-03   .3014322E-03   .8427553E-03
   .1640385E-02   .2508727E-02   .3163432E-02   .3419289E-02   .3386248E-02
   .3314728E-02   .3356083E-02   .3488084E-02   .3599544E-02   .3610204E-02
   .3522140E-02   .3407867E-02   .3331420E-02   .3197019E-02   .2658530E-02
   .1638592E-02   .7284143E-03   .5366101E-03   .6980530E-03   .6725160E-03
   .4299354E-03   .1241047E-03  -.2836251E-03  -.5991470E-03  -.4298722E-03
  -.3560054E-04  -.2268822E-03  -.1269132E-02  -.2493038E-02  -.3104049E-02
  -.2955420E-02  -.2488976E-02  -.2199511E-02  -.2250038E-02  -.2478607E-02
  -.2643790E-02  -.2644753E-02  -.2551306E-02  -.2407437E-02  -.2102922E-02
  -.1924300E-02  -.2138187E-02  -.2525369E-02  -.2670597E-02  -.2261716E-02
  -.1526354E-02  -.9942542E-03  -.8288681E-03  -.6986431E-03  -.6793461E-03
  -.1103027E-02  -.1592204E-02  -.1684389E-02  -.1548036E-02  -.1722747E-02
  -.2274914E-02  -.2760076E-02  -.2842723E-02  -.2583850E-02  -.2282200E-02
  -.2163185E-02  -.2220126E-02  -.2321118E-02  -.2370048E-02  -.2360281E-02
  -.2338543E-02  -.2348290E-02  -.2404399E-02  -.2492097E-02  -.2483645E-02
  -.2044101E-02  -.1034674E-02   .6958190E-04   .6689123E-03   .6551746E-03
   .3623190E-03   .1471225E-03   .1218042E-03   .1846077E-03   .2092425E-03
   .1891312E-03   .3177551E-03   .1007954E-02   .1892056E-02   .2350552E-02
   .2558652E-02   .2845451E-02   .3154735E-02   .3237602E-02   .2825519E-02
   .2034486E-02   .1269279E-02   .1215370E-02   .1786717E-02   .2342807E-02
   .2089183E-02   .1031964E-02   .4793672E-04  -.2351446E-03   .7111111E-04
   .4710556E-03   .6200178E-03   .5208686E-03   .3681620E-03   .3095341E-03
   .3477253E-03   .3965238E-03   .3804288E-03   .2859237E-03   .9001480E-04
  -.3709837E-03  -.1050839E-02  -.1793177E-02  -.2313756E-02  -.2270962E-02
  -.1943853E-02  -.1683687E-02  -.1620855E-02  -.1306548E-02  -.5412465E-03
   .1874635E-03   .4466677E-03   .2844296E-03   .4730284E-04   .8284989E-04
   .7136671E-03   .1934924E-02   .3128161E-02   .3660069E-02   .3509174E-02
   .3113977E-02   .2893824E-02   .2958349E-02   .3150748E-02   .3279293E-02
   .3285372E-02   .3217432E-02   .3146682E-02   .3125526E-02   .3166845E-02
   .3248144E-02   .3333483E-02   .3388212E-02   .3320566E-02   .2898858E-02
   .2151352E-02   .1266870E-02   .5456232E-03   .2338318E-03   .1904316E-03
  -.1457180E-03  -.1144858E-02  -.2511317E-02  -.3970899E-02  -.5164423E-02
  -.5677829E-02  -.5474605E-02  -.4819947E-02  -.4403439E-02  -.4494919E-02
  -.4337992E-02  -.3583985E-02  -.2774623E-02  -.2364875E-02  -.2057956E-02
  -.1373155E-02  -.4693884E-03   .1483612E-03   .2883833E-03   .1613962E-03
   .6654254E-04   .1311009E-03   .2915904E-03   .3956744E-03   .1735784E-03
  -.7366754E-03  -.1924992E-02  -.2533713E-02  -.2236007E-02  -.1663538E-02
  -.1274223E-02  -.1132757E-02  -.1169350E-02  -.1349549E-02  -.1772599E-02
  -.2155400E-02  -.1876959E-02  -.8442417E-03   .2284535E-03   .6670791E-03
   .4806232E-03   .1371005E-03   .2559536E-04   .1861572E-03   .3911475E-03
   .4438195E-03   .3371691E-03   .1882348E-03   .1085325E-03   .1332568E-03
   .2291391E-03   .3351453E-03   .4023782E-03   .4058414E-03   .3469134E-03
   .2557025E-03   .1749005E-03   .1420905E-03   .1717833E-03   .2578606E-03
   .3583728E-03   .4197622E-03   .4169284E-03   .3614917E-03   .2827251E-03
   .2355722E-03   .2562316E-03   .3237987E-03   .3756990E-03   .3571780E-03
   .1678511E-03  -.4396462E-03  -.1375288E-02  -.1978595E-02  -.1942566E-02
  -.1136911E-02  -.3816065E-04   .6071354E-03   .5972285E-03   .2820013E-03
   .7044274E-04   .2125514E-04  -.2755500E-03  -.1051064E-02  -.1627634E-02
  -.1244291E-02  -.1945008E-03   .6347448E-03   .7962120E-03   .5146180E-03
   .2439195E-03   .2200942E-03   .3681336E-03   .4825002E-03   .4615201E-03
   .3679176E-03   .2962750E-03   .2749567E-03   .2806429E-03   .2889060E-03
   .2993754E-03   .3327070E-03   .4029520E-03   .4964578E-03   .5701440E-03
   .5770544E-03   .5089229E-03   .4009463E-03   .2978373E-03   .2187008E-03
   .1690256E-03   .1512056E-03   .1587183E-03   .1810434E-03   .2116810E-03
   .2523751E-03   .2843288E-03   .2153437E-03  -.1830043E-03  -.8159278E-03
  -.1285304E-02  -.1384295E-02  -.1242515E-02  -.1165965E-02  -.1426155E-02
  -.1623250E-02  -.1162387E-02  -.2581734E-03   .4047928E-03   .5086710E-03
   .2745966E-03   .7927122E-04   .9549833E-04   .2496637E-03   .4477639E-03
   .7564046E-03   .8932068E-03   .6248656E-03   .1837964E-03  -.9087041E-04
  -.8477793E-04   .8590555E-04   .2491772E-03   .3214894E-03   .3147336E-03
   .2755622E-03   .2375412E-03   .2134380E-03   .2063617E-03   .2226100E-03
   .2608175E-03   .2435564E-03  -.6643340E-04  -.6884986E-03  -.1499539E-02
  -.2225845E-02  -.2584086E-02  -.2585562E-02  -.2470131E-02  -.2444363E-02
  -.2538901E-02  -.2662214E-02  -.2725076E-02  -.2707203E-02  -.2588097E-02
  -.2262188E-02  -.1986346E-02  -.1893564E-02  -.2069933E-02  -.2391761E-02
  -.2256922E-02  -.1322347E-02  -.1302304E-03   .4111813E-03  -.2505944E-03
  -.1296471E-02  -.1396523E-02  -.4706824E-03   .5363443E-03   .8871670E-03
   .6267473E-03   .2348208E-03   .8399845E-04   .1926111E-03   .3733024E-03
   .4863505E-03   .5069538E-03   .4751584E-03   .4410754E-03   .4294764E-03
   .4326235E-03   .4308097E-03   .4127763E-03   .3797080E-03   .2796285E-03
  -.8844708E-04  -.6558154E-03  -.1142568E-02  -.1530485E-02  -.1710949E-02
  -.1828499E-02  -.2091689E-02  -.2395278E-02  -.2560258E-02  -.2556327E-02
  -.2482724E-02  -.2444129E-02  -.2460923E-02  -.2348823E-02  -.1614958E-02
  -.4195775E-03   .4650560E-03   .6586465E-03   .4060830E-03   .1729989E-03
   .1902664E-03   .3755084E-03   .5417389E-03   .5849993E-03   .5289792E-03
   .4576965E-03   .4340489E-03   .4664758E-03   .5249320E-03   .5758114E-03
   .6035902E-03   .5992457E-03   .5549097E-03   .4763542E-03   .3865399E-03
   .3138597E-03   .2007079E-03  -.2587402E-03  -.1235479E-02  -.2232505E-02
  -.2534222E-02  -.2333335E-02  -.2238369E-02  -.2404156E-02  -.2554450E-02
  -.2335674E-02  -.2045466E-02  -.2104250E-02  -.2427075E-02  -.2687744E-02
  -.2699155E-02  -.2537542E-02  -.2370127E-02  -.2288880E-02  -.2226705E-02
  -.1975176E-02  -.1796751E-02  -.1988518E-02  -.2367060E-02  -.2533819E-02
  -.2081979E-02  -.9887775E-03   .1173411E-03   .5971918E-03   .4371765E-03
   .8461567E-04  -.1934667E-03  -.7612603E-03  -.1637479E-02  -.2278974E-02
  -.2306462E-02  -.1614185E-02  -.4279251E-03   .6096087E-03   .1007045E-02
   .8662790E-03   .6037994E-03   .5133411E-03   .4589129E-03  -.1767607E-03
  -.1369583E-02  -.2362022E-02  -.2674748E-02  -.2479519E-02  -.2228559E-02
  -.2192067E-02  -.2333660E-02  -.2458436E-02  -.2438532E-02  -.2313684E-02
  -.2175141E-02  -.2073916E-02  -.2017132E-02  -.1987639E-02  -.1965462E-02
  -.1887436E-02  -.1465829E-02  -.5449284E-03   .4563564E-03   .9811203E-03
   .9546897E-03   .6990761E-03   .5315995E-03   .4818619E-03   .3070943E-03
   .1774707E-03   .3426135E-03   .6658516E-03   .8986680E-03   .9587706E-03
   .9237124E-03   .8930532E-03   .9144644E-03   .9628890E-03   .9741899E-03
   .8748002E-03   .5713933E-03   .3914611E-03   .5375986E-03   .6328686E-03
   .6469157E-03   .7712043E-03   .9526428E-03   .1050149E-02   .1020643E-02
   .7845459E-03   .3968811E-04  -.8065402E-03  -.1016852E-02  -.3689174E-03
   .5970179E-03   .1141140E-02   .1049174E-02   .6390137E-03   .3414641E-03
   .3490223E-03   .5619462E-03   .7718806E-03   .8624963E-03   .8568456E-03
   .8382165E-03   .8542932E-03   .8977720E-03   .9969306E-03   .1275085E-02
   .1450764E-02   .1245301E-02   .8501112E-03   .5962960E-03   .5941084E-03
   .7161730E-03   .7905663E-03   .7612193E-03   .6857806E-03   .6355933E-03
   .6543918E-03   .7136196E-03   .7354561E-03   .6887077E-03   .6055405E-03
   .5221908E-03   .4520624E-03   .3948757E-03   .3497072E-03   .3157912E-03
   .2935531E-03   .2863832E-03   .2998228E-03   .3295580E-03   .3058009E-03
  -.3001472E-04  -.8891846E-03  -.1941167E-02  -.2591751E-02  -.2660020E-02
  -.2443063E-02  -.2316502E-02  -.2417374E-02  -.2642961E-02  -.2820633E-02
  -.2841935E-02  -.2717076E-02  -.2566612E-02  -.2513752E-02  -.2571351E-02
  -.2671508E-02  -.2748113E-02  -.2775479E-02  -.2759646E-02  -.2706785E-02
  -.2634932E-02  -.2573614E-02  -.2527851E-02  -.2504094E-02  -.2496780E-02
  -.2482720E-02  -.2444381E-02  -.2384802E-02  -.2312340E-02  -.2240402E-02
  -.2202962E-02  -.2216427E-02  -.2257986E-02  -.2278158E-02  -.2249797E-02
  -.2194567E-02  -.2130175E-02  -.2075906E-02  -.2050520E-02  -.2034893E-02
  -.1869581E-02  -.1390070E-02  -.6942094E-03   .5028320E-04   .5572808E-03
   .6840239E-03   .5798582E-03   .5037633E-03   .5877076E-03   .7721475E-03
   .9273016E-03   .9689820E-03   .9119167E-03   .8482652E-03   .8289920E-03
   .8346544E-03   .8237540E-03   .7805780E-03   .7227109E-03   .6847118E-03
   .6876158E-03   .7264525E-03   .7867252E-03   .8443490E-03   .7567339E-03
   .2145439E-03  -.7948346E-03  -.1718106E-02  -.2048416E-02  -.1829818E-02
  -.1371986E-02  -.8124080E-03  -.4474893E-03  -.6802941E-03  -.1328156E-02
  -.1835155E-02  -.1911954E-02  -.1621040E-02  -.9543437E-03   .8145232E-04
   .1079845E-02   .1573597E-02   .1529680E-02   .1277602E-02   .1132461E-02
   .1184859E-02   .1327326E-02   .1427773E-02   .1433472E-02   .1401500E-02
   .1423568E-02   .1508532E-02   .1596742E-02   .1643502E-02   .1659602E-02
   .1657439E-02   .1654997E-02   .1663891E-02   .1676383E-02   .1695740E-02
   .1715547E-02   .1653767E-02   .1297646E-02   .7966261E-03   .7411893E-03
   .1241163E-02   .1804047E-02   .2035392E-02   .1963721E-02   .1831108E-02
   .1803073E-02   .1892194E-02   .2021489E-02   .2108520E-02   .2129931E-02
   .2120573E-02   .2123636E-02   .2144840E-02   .2158960E-02   .2143321E-02
   .2098431E-02   .2045631E-02   .2010221E-02   .1998068E-02   .1995078E-02
   .1987349E-02   .2014472E-02   .2233969E-02   .2518115E-02   .2683027E-02
   .2684642E-02   .2679320E-02   .2870613E-02   .2950511E-02   .2777032E-02
   .2441798E-02   .1994369E-02   .1650994E-02   .1561630E-02   .1653801E-02
   .1761660E-02   .1799652E-02   .1739646E-02   .1446811E-02   .8565485E-03
   .1517977E-03  -.1821103E-03  -.1875388E-04  -.9676895E-04  -.4193514E-03
  -.6193160E-03  -.6180283E-03  -.4992083E-03  -.6197304E-03  -.9810348E-03
  -.1308101E-02  -.1426461E-02  -.1389154E-02  -.1331883E-02  -.1316670E-02
  -.1339540E-02  -.1366530E-02  -.1350113E-02  -.1102946E-02  -.5285055E-03
   .3493721E-04   .2409464E-03  -.9056760E-04  -.8369325E-03  -.1438022E-02
  -.1358246E-02  -.4376495E-03   .8594469E-03   .1723756E-02   .1801442E-02
   .1418769E-02   .1109736E-02   .1131317E-02   .1378460E-02   .1609101E-02
   .1687213E-02   .1636806E-02   .1554781E-02   .1508202E-02   .1504046E-02
   .1517024E-02   .1520262E-02   .1505516E-02   .1435605E-02   .1039055E-02
   .1582728E-03  -.6665865E-03  -.9945099E-03  -.6785752E-03  -.1038132E-03
   .2102013E-03   .1313295E-03  -.8160722E-04  -.1721630E-03  -.9404553E-04
   .6126631E-04   .3029896E-03   .6108858E-03   .6422430E-03   .3667853E-03
   .1978442E-03   .2637613E-03   .1381900E-03  -.3437228E-04   .1630152E-03
   .8573634E-03   .1613339E-02   .1967832E-02   .1890120E-02   .1685817E-02
   .1635721E-02   .1748119E-02   .1864702E-02   .1853456E-02   .1575585E-02
   .9550347E-03   .3276299E-03   .2139067E-03   .8053107E-03   .1597341E-02
   .2018595E-02   .1964519E-02   .1719975E-02   .1589799E-02   .1660266E-02
   .1822414E-02   .1938256E-02   .1965604E-02   .1950425E-02   .1939458E-02
   .1948158E-02   .1970560E-02   .1996625E-02   .2028751E-02   .2069033E-02
   .2101934E-02   .2126246E-02   .2127962E-02   .2096498E-02   .2063648E-02
   .2053710E-02   .2060742E-02   .2060535E-02   .2043844E-02   .2038032E-02
   .2046605E-02   .2046757E-02   .2030128E-02   .2006149E-02   .1976290E-02
   .1965379E-02   .1990551E-02   .2000093E-02   .1817787E-02   .1285143E-02
   .6563965E-03   .1547234E-03  -.3178521E-03  -.7186862E-03  -.9021716E-03
  -.7517245E-03  -.3858166E-03  -.3194807E-03  -.6671784E-03  -.1086632E-02
  -.1269960E-02  -.1206781E-02  -.1091158E-02  -.1045519E-02  -.9064753E-03
  -.4298718E-03   .1802884E-03   .5500401E-03   .5653030E-03   .3948445E-03
   .2473672E-03   .1131348E-03  -.2443107E-03  -.7427111E-03  -.1054459E-02
  -.9444172E-03  -.3406449E-03   .4033402E-03   .8262129E-03   .8574440E-03
   .7323701E-03   .7006122E-03   .8213984E-03   .9861970E-03   .1061411E-02
   .9201382E-03   .5103966E-03   .1636863E-03  -.9830664E-04  -.3601556E-03
  -.5379649E-03  -.5765396E-03  -.5349030E-03  -.5057446E-03  -.5296266E-03
  -.5776261E-03  -.5934566E-03  -.5629654E-03  -.5116868E-03  -.4880506E-03
  -.4906835E-03  -.4877836E-03  -.4608429E-03  -.4309903E-03  -.4043290E-03
  -.3766448E-03  -.3493737E-03  -.3268023E-03  -.3089215E-03  -.2952923E-03
  -.2889451E-03  -.2901214E-03  -.2929382E-03  -.3068936E-03  -.3193665E-03
  -.3264577E-03  -.3192235E-03  -.2802943E-03  -.2231251E-03  -.1813782E-03
  -.1726371E-03  -.1826113E-03  -.1859065E-03  -.1735397E-03  -.1575440E-03
  -.1563552E-03  -.1788807E-03  -.2154431E-03  -.2442679E-03  -.2449186E-03
  -.2163929E-03  -.1822544E-03  -.1696309E-03  -.1893585E-03  -.2348768E-03
  -.2891307E-03  -.3317234E-03  -.3469943E-03  -.3279151E-03  -.2232324E-03
   .9554244E-04   .3951751E-03   .6011826E-03   .8201487E-03   .1010599E-02
   .1100664E-02   .1100927E-02   .1073831E-02   .1003773E-02   .7410303E-03
   .5628947E-03   .7343227E-03   .9883915E-03   .7921816E-03   .1392032E-03
  -.4592841E-03  -.6503645E-03  -.5088982E-03  -.3139375E-03  -.2392751E-03
  -.2857246E-03  -.2732848E-03   .1036896E-03   .7640351E-03   .1277370E-02
   .1332935E-02   .8204678E-03   .8016339E-04  -.3742566E-03  -.3961336E-03
  -.1313698E-03   .3671888E-03   .9295681E-03   .1259468E-02   .1260802E-02
   .1116336E-02   .1054731E-02   .1210417E-02   .1725744E-02   .2416849E-02
   .2868618E-02   .2928320E-02   .2784240E-02   .2695526E-02   .2748940E-02
   .2879131E-02   .2972943E-02   .2967249E-02   .2888875E-02   .2804785E-02
   .2779972E-02   .2822068E-02   .2872741E-02   .2877464E-02   .2830174E-02
   .2768889E-02   .2735490E-02   .2750462E-02   .2801335E-02   .2858181E-02
   .2899260E-02   .2915396E-02   .2913955E-02   .2908815E-02   .2901134E-02
   .2814892E-02   .2425238E-02   .1885125E-02   .1796416E-02   .2196537E-02
   .2346782E-02   .1903945E-02   .1273059E-02   .9409917E-03   .1068123E-02
   .1649465E-02   .2365358E-02   .2772067E-02   .2692040E-02   .2129052E-02
   .1418048E-02   .1001508E-02   .9859043E-03   .1150828E-02   .1239657E-02
   .1173137E-02   .1044351E-02   .9862529E-03   .1125439E-02   .1635669E-02
   .2346269E-02   .2832001E-02   .2912178E-02   .2680041E-02   .2097664E-02
   .1139809E-02   .2153108E-03  -.2110242E-03  -.1320138E-03   .1020051E-03
   .1798609E-03   .5303172E-04  -.1347510E-03  -.2382609E-03  -.2300471E-03
  -.1727763E-03  -.1366011E-03  -.1396520E-03  -.1615261E-03  -.1767287E-03
  -.1783700E-03  -.1669116E-03  -.1396073E-03  -.1198248E-03  -.1348453E-03
  -.1786898E-03  -.2284402E-03  -.2695627E-03  -.3017778E-03  -.3333247E-03
  -.3709354E-03  -.4078291E-03  -.4344546E-03  -.4447965E-03  -.4365219E-03
  -.3975396E-03  -.3366234E-03  -.2848453E-03  -.2626569E-03  -.2682354E-03
  -.2923697E-03  -.3056646E-03  -.2927237E-03  -.2815327E-03  -.2812783E-03
  -.2865287E-03  -.2793356E-03  -.2493336E-03  -.2154430E-03  -.2013841E-03
  -.2171459E-03  -.2298940E-03  -.1511146E-03   .2401609E-03   .8655168E-03
   .1261932E-02   .9904357E-03   .2266083E-03  -.3919076E-03  -.5081284E-03
  -.2639020E-03   .1438577E-04   .1076136E-03   .2433646E-04  -.8469044E-04
  -.3530630E-04   .3936761E-03   .1131071E-02   .1974540E-02   .2626338E-02
   .2848011E-02   .2657105E-02   .2118232E-02   .1493567E-02   .1128392E-02
   .1111670E-02   .1241816E-02   .1286011E-02   .1185685E-02   .1009531E-02
   .7333562E-03   .1825258E-03  -.5078561E-03  -.9711813E-03  -.1058760E-02
  -.1005961E-02  -.1202725E-02  -.1451558E-02  -.1401968E-02  -.1129112E-02
  -.9022624E-03  -.8608010E-03  -.9480885E-03  -.1042533E-02  -.1079670E-02
  -.1061626E-02  -.1018014E-02  -.9780470E-03  -.9546799E-03  -.9415326E-03
  -.9273037E-03  -.8501527E-03  -.5753888E-03  -.3896371E-03  -.5666656E-03
  -.9200414E-03  -.1081612E-02  -.8015631E-03  -.4070916E-03  -.1700834E-03
  -.2127250E-03  -.3536019E-03  -.5266446E-03  -.7079749E-03  -.5696031E-03
  -.8236492E-04   .2893096E-03   .1106527E-03  -.3196317E-03  -.6803471E-03
  -.9214523E-03  -.1018838E-02  -.1005958E-02  -.9695639E-03  -.9713391E-03
  -.9400490E-03  -.6741925E-03  -.4354953E-03  -.5418004E-03  -.8356808E-03
  -.9463240E-03  -.6249093E-03  -.1999006E-03   .1124973E-03   .3708925E-03
   .5546756E-03   .5569957E-03   .2497970E-03  -.5859271E-04  -.1875122E-03
  -.1024626E-03  -.1283179E-04   .1717011E-04  -.5536500E-04  -.3763645E-04
   .3076928E-03   .1023494E-02   .1797211E-02   .2206775E-02   .2175981E-02
   .1956033E-02   .1822422E-02   .1862547E-02   .1989787E-02   .2076599E-02
   .2074921E-02   .2022061E-02   .1981071E-02   .1983683E-02   .2019348E-02
   .2057977E-02   .2076508E-02   .2063918E-02   .1954149E-02   .1528920E-02
   .8109533E-03   .3253139E-04  -.3674951E-03  -.3706799E-03  -.1192719E-03
   .1762470E-03   .1283678E-03  -.1418044E-03  -.4563307E-03  -.6915544E-03
  -.5740351E-03  -.2999642E-03  -.1011007E-03  -.2043192E-03  -.6267051E-03
  -.1046320E-02  -.1215548E-02  -.1134861E-02  -.9107820E-03  -.4684448E-03
   .9932333E-04   .4797835E-03   .4725400E-03   .4927916E-04  -.3621943E-03
  -.5704410E-03  -.7044765E-03  -.8099189E-03  -.8763418E-03  -.8944489E-03
  -.8968804E-03  -.9187545E-03  -.9598166E-03  -.9903551E-03  -.9285520E-03
  -.6212336E-03  -.3163091E-03  -.1700509E-03  -.2477872E-03  -.2954233E-03
  -.6865932E-04   .2812389E-03   .5681908E-03   .9330115E-03   .1407904E-02
   .1779408E-02   .1902541E-02   .1824841E-02   .1704307E-02   .1671119E-02
   .1736069E-02   .1826440E-02   .1873649E-02   .1853841E-02   .1745579E-02
   .1347655E-02   .5035043E-03  -.3208150E-03  -.7181925E-03  -.8147885E-03
  -.6655044E-03  -.4737377E-03  -.4253988E-03  -.5935323E-03  -.1001968E-02
  -.1379149E-02  -.1459959E-02  -.1123161E-02  -.6777862E-03  -.4657989E-03
  -.5871480E-03  -.9594928E-03  -.1111805E-02  -.9343044E-03  -.6579366E-03
  -.5612335E-03  -.7773060E-03  -.9054239E-03  -.8265232E-03  -.8484948E-03
  -.1027407E-02  -.1200280E-02  -.1255317E-02  -.1216347E-02  -.1164569E-02
  -.1146366E-02  -.1153610E-02  -.1153137E-02  -.1081102E-02  -.7396618E-03
  -.1428752E-03   .3906490E-03   .8417841E-03   .1270705E-02   .1285906E-02
   .5844781E-03  -.2287831E-03  -.4184496E-03  -.2208258E-03  -.6359464E-04
  -.1098577E-03  -.2158956E-03  -.1186700E-03  -.7058644E-04  -.1956540E-03
  -.3696691E-03  -.4543076E-03  -.5030861E-03  -.7326229E-03  -.1047903E-02
  -.1229136E-02  -.1225018E-02  -.1154003E-02  -.1124998E-02  -.1154954E-02
  -.1192018E-02  -.1208837E-02  -.1222898E-02  -.1243897E-02  -.1261956E-02
  -.1217445E-02  -.9362051E-03  -.6182174E-03  -.6614426E-03  -.9817657E-03
  -.1243249E-02  -.1278162E-02  -.1158348E-02  -.1028701E-02  -.9966878E-03
  -.1066136E-02  -.1157647E-02  -.1202755E-02  -.1197338E-02  -.1176735E-02
  -.1166085E-02  -.1163826E-02  -.1156098E-02  -.1137233E-02  -.1114341E-02
  -.1097135E-02  -.1090781E-02  -.1092836E-02  -.1095358E-02  -.1094801E-02
  -.1088830E-02  -.1076011E-02  -.1060050E-02  -.1051946E-02  -.1059160E-02
  -.1080013E-02  -.1102447E-02  -.1117650E-02  -.1125616E-02  -.1132338E-02
  -.1138445E-02  -.1142493E-02  -.1142877E-02  -.1142118E-02  -.1141008E-02
  -.1140736E-02  -.1144322E-02  -.1155964E-02  -.1186630E-02  -.1205954E-02
  -.9982983E-03  -.4179898E-03   .4021105E-03   .1229246E-02   .1714656E-02
   .1701907E-02   .1029206E-02  -.2308289E-03  -.1311576E-02  -.1651299E-02
  -.1399709E-02  -.1063288E-02  -.9747267E-03  -.1116005E-02  -.1282200E-02
  -.1327595E-02  -.1259661E-02  -.1170438E-02  -.1128697E-02  -.1133803E-02
  -.1141563E-02  -.1074197E-02  -.6017300E-03   .1192509E-03   .3626899E-03
   .6530038E-04  -.5609992E-03  -.1076402E-02  -.1201211E-02  -.1041965E-02
  -.8748280E-03  -.8738723E-03  -.1006003E-02  -.1124193E-02  -.1158475E-02
  -.1141855E-02  -.1118498E-02  -.1110238E-02  -.1120928E-02  -.1144728E-02
  -.1173410E-02  -.1200067E-02  -.1219511E-02  -.1227049E-02  -.1221206E-02
  -.1203922E-02  -.1176824E-02  -.1146316E-02  -.1120300E-02  -.1106231E-02
  -.1104208E-02  -.1109186E-02  -.1112555E-02  -.1118539E-02  -.1128611E-02
  -.1119904E-02  -.1105014E-02  -.1121350E-02  -.1166709E-02  -.1207638E-02
  -.1205245E-02  -.1026704E-02  -.6719875E-03  -.5632492E-03  -.7929718E-03
  -.9130360E-03  -.3971440E-03   .4149226E-03   .6389430E-03   .5332871E-03
   .8127277E-03   .1448039E-02   .1954739E-02   .2068760E-02   .1912173E-02
   .1752423E-02   .1733832E-02   .1820583E-02   .1901041E-02   .1909036E-02
   .1862592E-02   .1793520E-02   .1564825E-02   .1024156E-02   .4527378E-03
   .3039739E-03   .4768382E-03   .2028377E-03  -.5510167E-03  -.1191084E-02
  -.1337870E-02  -.1102132E-02  -.8355371E-03  -.7634402E-03  -.8624774E-03
  -.9733657E-03  -.9778160E-03  -.8911568E-03  -.8009690E-03  -.7649736E-03
  -.7783359E-03  -.8040278E-03  -.8088687E-03  -.7863861E-03  -.7519872E-03
  -.7255539E-03  -.7035483E-03  -.6686035E-03  -.6323249E-03  -.6140576E-03
  -.6176028E-03  -.6292410E-03  -.6277599E-03  -.6006812E-03  -.5680154E-03
  -.5490516E-03  -.4585942E-03  -.1826645E-03  -.4539669E-04  -.1471714E-03
  -.1614221E-03  -.1721368E-03  -.3326052E-03  -.5374677E-03  -.6385296E-03
  -.6153633E-03  -.5476212E-03  -.5137662E-03  -.5286921E-03  -.5603433E-03
  -.5741275E-03  -.5651719E-03  -.5512124E-03  -.5495256E-03  -.5634605E-03
  -.5840739E-03  -.5997213E-03  -.5985120E-03  -.5712520E-03  -.5402323E-03
  -.5142976E-03  -.4967598E-03  -.5009423E-03  -.5102838E-03  -.5098904E-03
  -.4883574E-03  -.3948918E-03  -.9016372E-04   .1441399E-03   .1853431E-04
  -.2999092E-03  -.4982207E-03  -.4018264E-03   .2305869E-04   .3331244E-03
   .1907864E-03  -.1205787E-03  -.7227523E-04   .2344981E-03   .5917454E-03
   .8603113E-03   .7669431E-03   .5511942E-03   .5203399E-03   .4126813E-03
   .5544874E-04  -.3235352E-03  -.4837378E-03  -.4246226E-03  -.3064368E-03
  -.2622680E-03  -.3046775E-03  -.3657856E-03  -.3730113E-03  -.3202763E-03
  -.2608221E-03  -.2398237E-03  -.2520157E-03  -.2552657E-03  -.2343569E-03
  -.2003388E-03  -.1598740E-03  -.1258042E-03  -.1101868E-03  -.1127608E-03
  -.1238318E-03  -.1311207E-03  -.1294939E-03  -.1231112E-03  -.1164233E-03
  -.1090775E-03  -.1005439E-03  -.8710179E-04  -.6097696E-04  -.3445340E-04
  -.1975888E-04  -.2041209E-04  -.5333673E-04  -.2596609E-03  -.5593513E-03
  -.5266319E-03  -.1815780E-03   .1415613E-03   .2335968E-03   .1435229E-03
   .3633551E-04   .1420319E-04   .5947393E-04   .1006085E-03   .9453860E-04
   .5275830E-04   .1465695E-04   .1024652E-04   .4022951E-04   .8609797E-04
   .1259741E-03   .1471272E-03   .1501005E-03   .1417445E-03   .1282514E-03
   .1105696E-03   .8891726E-04   .6667477E-04   .4947300E-04   .4335749E-04
   .4757558E-04   .6035614E-04   .7227542E-04   .7284036E-04   .5992211E-04
   .3688898E-04   .1299232E-04  -.1322640E-05  -.1618969E-05   .6162619E-05
   .1084322E-04   .3359080E-05  -.1471839E-04  -.3621357E-04  -.5450903E-04
  -.6435442E-04  -.6381076E-04  -.5233960E-04  -.3176521E-04  -.6569335E-05
   .1643770E-04   .3512399E-04   .4766830E-04   .5352000E-04   .5495527E-04
   .5888470E-04   .8147325E-04   .2504341E-03   .5765513E-03   .6507047E-03
   .3734275E-03   .4423317E-04  -.7811299E-04   .8463949E-05   .1400953E-03
   .1826401E-03   .1252089E-03   .4395031E-04   .6397981E-05   .2341336E-04
   .6336073E-04   .9525679E-04   .1057071E-03   .1027381E-03   .1046723E-03
   .1318755E-03   .1706896E-03   .1928490E-03   .1868128E-03   .1620921E-03
   .1325124E-03   .1106951E-03   .1037874E-03   .1004693E-03   .7638801E-04
   .3735844E-04   .8683358E-05   .2405199E-05   .8286071E-05   .1269429E-04
   .1265038E-04   .1386989E-04   .2083037E-04   .3637457E-04   .5376775E-04
   .6372744E-04   .5390321E-04  -.6366507E-04  -.3926909E-03  -.7650761E-03
  -.1396364E-02  -.2219843E-02  -.2787711E-02  -.2891337E-02  -.2722944E-02
  -.2589291E-02  -.2523479E-02  -.2327184E-02  -.2150720E-02  -.2050315E-02
  -.2188673E-02  -.2537277E-02  -.2811898E-02  -.2780542E-02  -.2364755E-02
  -.1955209E-02  -.1694725E-02  -.1484492E-02  -.1331311E-02  -.1268248E-02
  -.1272569E-02  -.1284070E-02  -.1197065E-02  -.7880243E-03  -.1622381E-03
   .2678917E-03   .3138784E-03   .1376328E-03  -.5523499E-05  -.4510655E-05
   .8442665E-04   .1542551E-03   .1543141E-03   .1090650E-03   .7027456E-04
   .6367429E-04   .8095841E-04   .9971289E-04   .1056714E-03   .1007421E-03
   .9663290E-04   .1033692E-03   .1188548E-03   .1364428E-03   .1511567E-03
   .1588105E-03   .1569981E-03   .1485628E-03   .1403645E-03   .1338857E-03
   .1296672E-03   .1294040E-03   .1332360E-03   .1435632E-03   .1597110E-03
   .1770316E-03   .1914539E-03   .2032697E-03   .2128707E-03   .2194521E-03
   .2217560E-03   .2205815E-03   .2195072E-03   .2206961E-03   .2230730E-03
   .2251551E-03   .2265871E-03   .2274237E-03   .2279655E-03   .2291271E-03
   .2305196E-03   .2316539E-03   .2248227E-03   .1442329E-03  -.1546884E-03
  -.4500553E-03  -.6067245E-03  -.5730933E-03  -.5067858E-03  -.3932503E-03
  -.1446383E-03   .1093995E-03   .2288559E-03   .2127438E-03   .1586449E-03
   .1491403E-03   .1896707E-03   .2387196E-03   .2604997E-03   .2507794E-03
   .2260059E-03   .2027788E-03   .1887901E-03   .1870565E-03   .1960711E-03
   .2070483E-03   .2150605E-03   .2195699E-03   .2210352E-03   .2191527E-03
   .2151438E-03   .2115934E-03   .2086416E-03   .2073059E-03   .2100685E-03
   .2164614E-03   .2275236E-03   .2433554E-03   .2580267E-03   .2678737E-03
   .2744337E-03   .2786423E-03   .2769694E-03   .2708308E-03   .2668005E-03
   .2676065E-03   .2709675E-03   .2753097E-03   .2810434E-03   .2891770E-03
   .2960620E-03   .3001491E-03   .3046706E-03   .3126856E-03   .3198562E-03
   .3238279E-03   .3244364E-03   .3234197E-03   .3216556E-03   .3178167E-03
   .3134278E-03   .3156799E-03   .3254145E-03   .3395876E-03   .3517495E-03
   .3595488E-03   .3608045E-03   .3533837E-03   .3377331E-03   .3163774E-03
   .2959541E-03   .2812332E-03   .2716221E-03   .2674185E-03   .2623187E-03
   .2568362E-03   .2535561E-03   .2540978E-03   .2612318E-03   .2744450E-03
   .2896873E-03   .3020527E-03   .3110673E-03   .3176788E-03   .3216048E-03
   .3231551E-03   .3221807E-03   .3224216E-03   .3261319E-03   .3348943E-03
   .3466430E-03   .3590327E-03   .3702132E-03   .3793402E-03   .3839922E-03
   .3816114E-03   .3731971E-03   .3634371E-03   .3548832E-03   .3485362E-03
   .3462162E-03   .3473471E-03   .3499197E-03   .3509551E-03   .3494521E-03
   .3491341E-03   .3687373E-03   .4003526E-03   .4016310E-03   .3623101E-03
   .3188242E-03   .3026738E-03   .3134989E-03   .3280713E-03   .3289653E-03
   .3177865E-03   .3076603E-03   .3103863E-03   .3288032E-03   .3543380E-03
   .3736876E-03   .3794317E-03   .3712650E-03   .3568295E-03   .3453575E-03
   .3405462E-03   .3427465E-03   .3476233E-03   .3548195E-03   .3626841E-03
   .3671872E-03   .3666761E-03   .3658354E-03   .3663938E-03   .3698046E-03
   .3704502E-03   .3652357E-03   .3571115E-03   .3509406E-03   .3479240E-03
   .3469345E-03   .3468061E-03   .3501699E-03   .3560052E-03   .3628618E-03
   .3690016E-03   .3736998E-03   .3789342E-03   .3878810E-03   .3960836E-03
   .4022005E-03   .4092968E-03   .4192237E-03   .4304561E-03   .4405191E-03
   .4487875E-03   .4666291E-03   .4820722E-03   .4714636E-03   .4435710E-03
   .4229148E-03   .4176498E-03   .4203153E-03   .4186981E-03   .3672505E-03
   .1140829E-03  -.2505697E-03  -.7751898E-03  -.1533998E-02  -.1944991E-02
  -.1649932E-02  -.1068079E-02  -.7945557E-03  -.1120653E-02  -.1678153E-02
  -.2046393E-02  -.2258699E-02  -.2335666E-02  -.2080131E-02  -.1497857E-02
  -.9883882E-03  -.8853053E-03  -.1319446E-02  -.2009955E-02  -.2274625E-02
  -.2006567E-02  -.1501123E-02  -.7658198E-03   .3198392E-04   .5175498E-03
   .5695390E-03   .4027925E-03   .2885904E-03   .3306515E-03   .4584559E-03
   .5549268E-03   .5705636E-03   .5353455E-03   .5034719E-03   .5050827E-03
   .5308056E-03   .5538675E-03   .5566236E-03   .5412703E-03   .5215639E-03
   .5052613E-03   .4941248E-03   .4870758E-03   .4835980E-03   .4819552E-03
   .4822398E-03   .4829498E-03   .4811778E-03   .4747350E-03   .4635316E-03
   .4499633E-03   .4393599E-03   .4370745E-03   .4585792E-03   .5011765E-03
   .5400644E-03   .5582275E-03   .5588584E-03   .5575208E-03   .5605291E-03
   .5483854E-03   .5105164E-03   .4314612E-03   .3627213E-03   .1198022E-03
  -.1286697E-03  -.4357106E-04   .2842775E-03   .5467425E-03   .5903842E-03
   .4899384E-03   .3985655E-03   .3986835E-03   .4644654E-03   .5260730E-03
   .5466446E-03   .5455432E-03   .5413566E-03   .5300692E-03   .5167272E-03
   .5113216E-03   .5151938E-03   .5229863E-03   .5273165E-03   .5257148E-03
   .5186567E-03   .5098377E-03   .5037352E-03   .5031051E-03   .5040364E-03
   .5023044E-03   .4950227E-03   .4876411E-03   .4845659E-03   .4822548E-03
   .4769166E-03   .4718612E-03   .4694824E-03   .4702676E-03   .4721561E-03
   .4738860E-03   .4780658E-03   .4860940E-03   .4971575E-03   .5071796E-03
   .5150939E-03   .5206639E-03   .5252152E-03   .5292090E-03   .5297776E-03
   .5258379E-03   .5152350E-03   .5025261E-03   .4918931E-03   .4880858E-03
   .4853302E-03   .4393295E-03   .2026171E-03  -.9798566E-04  -.3529082E-03
  -.8067464E-03  -.1257840E-02  -.1234336E-02  -.6182263E-03   .2366881E-03
   .7685445E-03   .7447751E-03   .2547121E-03  -.1821652E-03  -.7791977E-04
   .3818701E-03   .6874332E-03   .4243447E-03  -.2573930E-03  -.5902263E-03
  -.2434986E-03   .1270409E-03  -.7013880E-04  -.6648015E-03  -.1296517E-02
  -.1578679E-02  -.1319209E-02  -.8325079E-03  -.4808451E-03  -.1951731E-03
   .9805015E-04  -.1313880E-03  -.1075570E-02  -.1998360E-02  -.2083958E-02
  -.1396544E-02  -.9013716E-03  -.1189808E-02  -.1878807E-02  -.2331833E-02
  -.2324293E-02  -.2070730E-02  -.1879864E-02  -.1874027E-02  -.1978238E-02
  -.2062325E-02  -.2063369E-02  -.2010521E-02  -.1971960E-02  -.1971582E-02
  -.1980944E-02  -.1979685E-02  -.1968466E-02  -.1957044E-02  -.1946917E-02
  -.1892820E-02  -.1612759E-02  -.1092640E-02  -.6012558E-03  -.2111586E-03
   .4222698E-05   .5617277E-04   .2659596E-04   .4328083E-04   .2741864E-03
   .5860479E-03   .7629154E-03   .7529863E-03   .6595952E-03   .6019281E-03
   .6166940E-03   .6690249E-03   .7168128E-03   .7018652E-03   .4779529E-03
   .2247480E-03   .2754394E-03   .5510568E-03   .7746179E-03   .8097021E-03
   .7200748E-03   .6368005E-03   .6286252E-03   .6765734E-03   .7252913E-03
   .7364392E-03   .6954692E-03   .4735934E-03  -.1293247E-06  -.4869697E-03
  -.8952419E-03  -.1313467E-02  -.1644175E-02  -.1774974E-02  -.1743016E-02
  -.1673189E-02  -.1652062E-02  -.1673169E-02  -.1692012E-02  -.1695569E-02
  -.1684725E-02  -.1663914E-02  -.1630198E-02  -.1590048E-02  -.1560328E-02
  -.1536024E-02  -.1522047E-02  -.1523119E-02  -.1522486E-02  -.1511858E-02
  -.1471071E-02  -.1307064E-02  -.9999135E-03  -.6498481E-03  -.1984055E-03
   .7732610E-04   .1563898E-03   .3738171E-03   .7524720E-03   .1049580E-02
   .1126700E-02   .1054083E-02   .9845561E-03   .1004503E-02   .1086001E-02
   .1150616E-02   .1159455E-02   .1132328E-02   .1107470E-02   .1108893E-02
   .1137364E-02   .1166691E-02   .1172080E-02   .1156261E-02   .1137275E-02
   .1127043E-02   .1118414E-02   .1035322E-02   .8009505E-03   .6980255E-03
   .8958351E-03   .1198597E-02   .1355834E-02   .1311094E-02   .1111542E-02
   .8072383E-03   .7125389E-03   .9378810E-03   .1235989E-02   .1366901E-02
   .1309446E-02   .1190602E-02   .1086776E-02   .8505696E-03   .4808696E-03
   .2466152E-03   .4359682E-03   .9359574E-03   .1339704E-02   .1418901E-02
   .1270592E-02   .1120348E-02   .1093520E-02   .1161112E-02   .1230413E-02
   .1241112E-02   .1198740E-02   .1102773E-02   .8864488E-03   .7497759E-03
   .8590273E-03   .1028919E-02   .9431002E-03   .7055426E-03   .4586462E-03
   .2731437E-03   .3743385E-03   .7588390E-03   .1112064E-02   .1210242E-02
   .1095090E-02   .9083751E-03   .6439258E-03   .3050812E-03   .3172030E-04
  -.1819755E-03  -.2856131E-03  -.1998822E-03  -.1539184E-03  -.2398322E-03
  -.3732758E-03  -.4421747E-03  -.4551311E-03  -.5270773E-03  -.4901701E-03
  -.1892363E-03   .3076806E-03   .7637491E-03   .8278978E-03   .4437098E-03
  -.1376174E-03  -.5694417E-03  -.4573482E-03  -.4632946E-04   .1259830E-03
  -.1992782E-04  -.6884857E-04   .3109288E-03   .7349360E-03   .7250758E-03
   .3933913E-03   .2302284E-03   .4944936E-03   .9126007E-03   .1134643E-02
   .1085810E-02   .9232179E-03   .8213457E-03   .8307795E-03   .8925114E-03
   .9294981E-03   .9148260E-03   .8710680E-03   .8262658E-03   .7911066E-03
   .7696291E-03   .7645794E-03   .7675466E-03   .7571893E-03   .7393701E-03
   .7256781E-03   .7026781E-03   .5854851E-03   .4063979E-03   .3903628E-03
   .5389679E-03   .6856965E-03   .7188064E-03   .6487681E-03   .4885498E-03
   .2991652E-03   .2683156E-03   .2636002E-03   .1550962E-04  -.3401956E-03
  -.5744365E-03  -.5867407E-03  -.5576617E-03  -.5541826E-03  -.5140747E-03
  -.4756596E-03  -.4524053E-03  -.5226752E-03  -.5999428E-03  -.5560504E-03
  -.4597146E-03  -.3879951E-03  -.4392849E-03  -.4576764E-03  -.2868151E-03
  -.1612087E-03  -.1300193E-03  -.5734510E-04   .9867802E-04   .1538760E-03
   .5042130E-04  -.8906980E-04  -.1431996E-03  -.4204738E-04   .2150315E-03
   .4684361E-03   .5641541E-03   .5036226E-03   .4024338E-03   .3612326E-03
   .3913310E-03   .4368370E-03   .4524168E-03   .4278914E-03   .3881743E-03
   .3607743E-03   .3498295E-03   .3342440E-03   .2593436E-03   .1265341E-03
   .9107364E-04   .1875084E-03   .2992843E-03   .3261808E-03   .2753750E-03
   .2141106E-03   .1897356E-03   .1994660E-03   .2096205E-03   .1620889E-03
  -.1646745E-04  -.2827191E-03  -.5299653E-03  -.6190332E-03  -.5865041E-03
  -.5095807E-03  -.4860273E-03  -.5028951E-03  -.5744177E-03  -.6525889E-03
  -.5932746E-03  -.4081667E-03  -.2140724E-03  -.3964190E-04   .9402572E-04
   .1480619E-03   .1327616E-03   .9899616E-04   .8652721E-04   .9815289E-04
   .1075186E-03   .3802250E-04  -.2232684E-03  -.5574980E-03  -.6898502E-03
  -.5048998E-03  -.2905960E-03  -.2559914E-03  -.3751848E-03  -.4514355E-03
  -.3621779E-03  -.1361009E-03   .5651568E-04   .7017777E-04   .1815902E-05
  -.1120131E-04   .4067402E-04   .7561101E-04   .2518246E-04  -.4691684E-04
  -.9048627E-04  -.5974972E-04   .2726797E-04   .9641135E-04   .1066258E-03
   .7600165E-04   .4646719E-04   .4430426E-04   .6050981E-04   .6896941E-04
   .5789441E-04   .2029851E-04  -.4845229E-04  -.7965001E-04  -.6003586E-04
  -.7513746E-04  -.1487097E-03  -.2412039E-03  -.3417158E-03  -.4197558E-03
  -.4096302E-03  -.2518596E-03  -.3711634E-04   .8796322E-04   .8374649E-04
   .1973341E-04  -.2200621E-04  -.1461536E-04   .1629674E-04   .3629423E-04
   .3290227E-04   .1663413E-04   .3569006E-05   .7956642E-06   .3663675E-05
   .5536551E-05   .4005536E-05   .2663951E-06  -.3582122E-05  -.6878472E-05
  -.9349586E-05  -.1176582E-04  -.1436749E-04  -.1734402E-04  -.2056957E-04
  -.2440301E-04  -.2957707E-04  -.4513372E-04  -.8128932E-04  -.1004473E-03
  -.7887767E-04  -.4300165E-04  -.2493598E-04  -.3112074E-04  -.4676897E-04
  -.5649752E-04  -.5633790E-04  -.5182483E-04  -.4940727E-04  -.5147052E-04
  -.5591575E-04  -.5932187E-04  -.6090332E-04  -.6158194E-04  -.6263313E-04
  -.6490542E-04  -.6797050E-04  -.7049174E-04  -.7224241E-04  -.7371804E-04
  -.7553040E-04  -.7765132E-04  -.7978242E-04  -.8148983E-04  -.8271411E-04
  -.8372834E-04  -.8493882E-04  -.8626782E-04  -.8732665E-04  -.8818743E-04
  -.8905690E-04  -.9012645E-04  -.9097068E-04  -.9151399E-04  -.9212591E-04
  -.9285169E-04  -.9327753E-04  -.9339307E-04  -.9328445E-04  -.9340520E-04
  -.9396971E-04  -.9470413E-04  -.9532512E-04  -.9582245E-04  -.9610856E-04
  -.9643774E-04  -.9682903E-04  -.9723352E-04  -.9784070E-04  -.9871487E-04
  -.9938048E-04  -.9953872E-04  -.9937922E-04  -.9920014E-04  -.9911634E-04
  -.9914111E-04  -.9906334E-04  -.9890567E-04  -.9875006E-04  -.9862102E-04
  -.9832389E-04  -.9786486E-04  -.9742599E-04  -.9700143E-04  -.9657937E-04
  -.9620225E-04  -.9566520E-04  -.9512621E-04  -.9468441E-04  -.9633583E-04
  -.9912034E-04  -.9820527E-04  -.9637807E-04  -.1003596E-03  -.1076571E-03
  -.1112337E-03  -.1091185E-03  -.1025022E-03  -.9734071E-04  -.9622965E-04
  -.9499475E-04  -.9158740E-04  -.8753274E-04  -.8579853E-04  -.8731988E-04
  -.8902631E-04  -.8809830E-04  -.8372291E-04  -.7815261E-04  -.7449708E-04
  -.7314535E-04  -.7319876E-04  -.7122236E-04  -.6535011E-04  -.5908519E-04
  -.5692330E-04  -.5919343E-04  -.6114323E-04  -.5947863E-04  -.5519680E-04
  -.5151365E-04  -.4982052E-04  -.4989332E-04  -.5054338E-04  -.5052894E-04
  -.4865172E-04  -.4549556E-04  -.4291963E-04  -.4180808E-04  -.4191045E-04
  -.4184254E-04  -.4087489E-04  -.3913247E-04  -.3747466E-04  -.3628259E-04
  -.3531871E-04  -.3411834E-04  -.3257398E-04  -.3111925E-04  -.2987282E-04
  -.2867815E-04  -.2758588E-04  -.2658074E-04  -.2551481E-04  -.2431647E-04
  -.2305958E-04  -.2196288E-04  -.2105835E-04  -.2018493E-04  -.1923267E-04
  -.1820515E-04  -.1724352E-04  -.1641153E-04  -.1564863E-04  -.1486641E-04
  -.1404506E-04  -.1325196E-04  -.1252102E-04  -.1182816E-04  -.1115954E-04
  -.1053427E-04  -.9964048E-05  -.9435008E-05  -.8930612E-05  -.8455428E-05
  -.8019208E-05  -.7616202E-05  -.7235636E-05  -.6878086E-05  -.6547706E-05
  -.6250539E-05  -.5986952E-05  -.5756803E-05  -.5562101E-05  -.5404769E-05
  -.5286709E-05  -.5208386E-05  -.5170074E-05  -.5172984E-05  -.5218302E-05
  -.5306236E-05
