# Supplementary material for: Earthquake Response Analysis of Tall Reinforced Concrete Chimneys considering Eccentricity
Source: Hindawi journal article supplement (doi:10.1155/2020/1417969), 2020-03-11
Supplement: f1 [file 1417969.f1.zip › 1417969.f1/Four kinds of earthquake records/Rock/MORGAN G01230.txt]

PEER STRONG MOTION DATABASE RECORD. PROCESSING BY PACIFIC ENGINEERING.
MORGAN HILL 04/24/84 04:24, GILROY ARRAY #1, 230 (CDMG STATION 47379)
ACCELERATION TIME HISTORY IN UNITS OF G. FILTER POINTS: HP=0.1 Hz LP=29.0 Hz
NPTS=  5996, DT= .00500 SEC
   .7952558E-03   .8578566E-03   .8578073E-03   .8525117E-03   .8471769E-03
   .8425757E-03   .8402253E-03   .8402783E-03   .8415632E-03   .8395127E-03
   .8333624E-03   .8248568E-03   .8121005E-03   .7978135E-03   .7875770E-03
   .7868916E-03   .8006398E-03   .8283098E-03   .8596724E-03   .8797430E-03
   .8776531E-03   .8517152E-03   .8083971E-03   .7542334E-03   .6949356E-03
   .6401779E-03   .6011842E-03   .5874676E-03   .6064211E-03   .6611876E-03
   .7428929E-03   .8297598E-03   .8986162E-03   .9362893E-03   .9446398E-03
   .9207914E-03   .8590535E-03   .7625368E-03   .6477043E-03   .5431310E-03
   .4898961E-03   .5050483E-03   .5830132E-03   .7217191E-03   .8660240E-03
   .9318035E-03   .8730449E-03   .7104158E-03   .4976757E-03   .2846044E-03
   .1381978E-03   .1511440E-03   .3136060E-03   .4811960E-03   .4938960E-03
   .2478442E-03  -.2143579E-03  -.7204524E-03  -.1093712E-02  -.1287740E-02
  -.1284607E-02  -.1121665E-02  -.8483548E-03  -.4916253E-03  -.1193689E-03
   .2023053E-03   .4644813E-03   .8018710E-03   .1256501E-02   .1664811E-02
   .1862449E-02   .1768586E-02   .1407774E-02   .8659769E-03   .3336243E-03
   .2393496E-06  -.5866044E-04   .1453836E-03   .4813084E-03   .6996093E-03
   .6548966E-03   .5185226E-03   .6020265E-03   .8691050E-03   .1043446E-02
   .9959202E-03   .7071105E-03   .2665704E-03  -.8431082E-04  -.1314697E-03
   .5119868E-04   .2542031E-03   .3497002E-03   .3717579E-03   .5126967E-03
   .9084226E-03   .1570091E-02   .2462260E-02   .3291210E-02   .3493077E-02
   .2872925E-02   .1827986E-02   .8225643E-03   .4295407E-04  -.5473369E-03
  -.9483575E-03  -.1157051E-02  -.1215263E-02  -.1059062E-02  -.5808753E-03
   .3145505E-03   .1560221E-02   .2649020E-02   .2869211E-02   .1974996E-02
   .3370364E-03  -.1332342E-02  -.2404180E-02  -.2736568E-02  -.2591699E-02
  -.2174284E-02  -.1528591E-02  -.5899294E-03   .7174968E-03   .2314665E-02
   .3729629E-02   .4197862E-02   .3254882E-02   .1333784E-02  -.7572819E-03
  -.2455953E-02  -.3234022E-02  -.2651093E-02  -.1049976E-02   .4965785E-03
   .1061674E-02   .2447136E-03  -.1952784E-02  -.4788338E-02  -.7098513E-02
  -.7948931E-02  -.6696444E-02  -.3346119E-02   .1084607E-02   .5315665E-02
   .8257145E-02   .9017176E-02   .7284672E-02   .3305675E-02  -.1870421E-02
  -.6613930E-02  -.9395453E-02  -.9641243E-02  -.7773149E-02  -.4657577E-02
  -.1156502E-02   .2110921E-02   .4692491E-02   .6163931E-02   .6273238E-02
   .5056090E-02   .2670788E-02  -.5349772E-03  -.4081662E-02  -.6829593E-02
  -.7712368E-02  -.6677954E-02  -.4634026E-02  -.2603171E-02  -.1767747E-02
  -.2912054E-02  -.5416114E-02  -.7744174E-02  -.8567233E-02  -.7621942E-02
  -.5378475E-02  -.2723694E-02  -.5213230E-03   .8573069E-03   .1528926E-02
   .1956646E-02   .2218243E-02   .1969088E-02   .8088912E-03  -.1192493E-02
  -.3304662E-02  -.4614583E-02  -.4464667E-02  -.2605035E-02   .2807113E-03
   .2943605E-02   .4462896E-02   .4695890E-02   .3866417E-02   .2358309E-02
   .1076093E-02   .7989608E-03   .1335970E-02   .1996185E-02   .2332298E-02
   .2376011E-02   .2516994E-02   .2735908E-02   .2321821E-02   .6825997E-03
  -.2391100E-02  -.6025107E-02  -.9220766E-02  -.1142408E-01  -.1212866E-01
  -.1096595E-01  -.8625198E-02  -.6138583E-02  -.3432131E-02  -.3683962E-03
   .2680271E-02   .4914730E-02   .5650105E-02   .4949813E-02   .3369200E-02
   .1065986E-02  -.1917790E-02  -.4841602E-02  -.6843583E-02  -.7823104E-02
  -.7988221E-02  -.7426819E-02  -.6318834E-02  -.4717589E-02  -.2528791E-02
   .4186445E-03   .3475258E-02   .5253172E-02   .4989534E-02   .3074245E-02
   .9953078E-05  -.4097905E-02  -.9010295E-02  -.1436762E-01  -.1981714E-01
  -.2487583E-01  -.2847218E-01  -.2874169E-01  -.2371234E-01  -.1249709E-01
   .3364308E-02   .1925433E-01   .2876612E-01   .2725624E-01   .1576348E-01
   .6173796E-03  -.1169629E-01  -.1943385E-01  -.2438581E-01  -.2665234E-01
  -.2416687E-01  -.1671957E-01  -.7882244E-02  -.1753574E-02   .2112063E-02
   .8356248E-02   .1963607E-01   .3289025E-01   .4255511E-01   .4542142E-01
   .4162046E-01   .3262610E-01   .1937271E-01   .2302219E-02  -.1636087E-01
  -.3203011E-01  -.3961294E-01  -.3620560E-01  -.2299927E-01  -.4914199E-02
   .1177992E-01   .2393309E-01   .3347216E-01   .4403558E-01   .5593172E-01
   .6414617E-01   .6154400E-01   .4492238E-01   .1840608E-01  -.1008633E-01
  -.3314001E-01  -.4668266E-01  -.4935856E-01  -.4109833E-01  -.2408976E-01
  -.4135506E-02   .1203958E-01   .1986839E-01   .1820864E-01   .8650036E-02
  -.4364379E-02  -.1407657E-01  -.1503422E-01  -.7235940E-02   .4093159E-02
   .1187474E-01   .1049976E-01  -.1288716E-02  -.1894674E-01  -.3485403E-01
  -.4244895E-01  -.3912153E-01  -.2628454E-01  -.6975454E-02   .1663262E-01
   .4087963E-01   .5913730E-01   .6645396E-01   .6111887E-01   .4481037E-01
   .2089324E-01  -.6072196E-02  -.3102894E-01  -.4797314E-01  -.5226562E-01
  -.4331228E-01  -.2464582E-01  -.2924884E-02   .1360924E-01   .1954858E-01
   .1425301E-01   .1839515E-02  -.1171167E-01  -.2257417E-01  -.2901226E-01
  -.3040957E-01  -.2717265E-01  -.2095956E-01  -.1432212E-01  -.9304327E-02
  -.4859829E-02   .2921630E-02   .1666639E-01   .3371306E-01   .4731288E-01
   .5182310E-01   .4683395E-01   .3708203E-01   .2818220E-01   .2264347E-01
   .1963803E-01   .1735670E-01   .1523435E-01   .1288726E-01   .9071513E-02
   .2246124E-02  -.7169263E-02  -.1625662E-01  -.2133555E-01  -.1974372E-01
  -.1191561E-01  -.2027757E-02   .3969462E-02   .2642867E-02  -.4050004E-02
  -.1066639E-01  -.1291030E-01  -.9910956E-02  -.3653505E-02   .2992597E-02
   .7443534E-02   .7572489E-02   .2485638E-02  -.5848282E-02  -.1287063E-01
  -.1462734E-01  -.1056882E-01  -.3040396E-02   .5262009E-02   .1310352E-01
   .1971254E-01   .2349763E-01   .2272763E-01   .1718834E-01   .8531987E-02
  -.7744140E-03  -.8516376E-02  -.1276118E-01  -.1266619E-01  -.9556979E-02
  -.6622613E-02  -.6497115E-02  -.9323719E-02  -.1248634E-01  -.1274956E-01
  -.8708559E-02  -.1983131E-02   .3752688E-02   .5434523E-02   .2748334E-02
  -.1447456E-02  -.3763081E-02  -.3463758E-02  -.2141119E-02  -.1224630E-02
  -.7103233E-03   .6089741E-03   .3090459E-02   .5547658E-02   .6441823E-02
   .5525631E-02   .3715733E-02   .9262167E-03  -.4267183E-02  -.1238674E-01
  -.2162061E-01  -.2875748E-01  -.3115065E-01  -.2810250E-01  -.2021901E-01
  -.8824412E-02   .4296360E-02   .1610762E-01   .2297792E-01   .2247018E-01
   .1483392E-01   .3615223E-02  -.6312568E-02  -.1177164E-01  -.1172754E-01
  -.6057276E-02   .4723292E-02   .1809717E-01   .3046885E-01   .3797616E-01
   .3802212E-01   .2980691E-01   .1407176E-01  -.5327010E-02  -.2261945E-01
  -.3396162E-01  -.3872220E-01  -.3768536E-01  -.3182368E-01  -.2213781E-01
  -.9938052E-02   .2760664E-02   .1364171E-01   .2119533E-01   .2484056E-01
   .2509340E-01   .2343175E-01   .2137956E-01   .2010955E-01   .2022528E-01
   .2092643E-01   .1965442E-01   .1364509E-01   .2566942E-02  -.1061366E-01
  -.2128110E-01  -.2591970E-01  -.2415727E-01  -.1794778E-01  -.9343656E-02
   .4464064E-03   .1019415E-01   .1784957E-01   .2156515E-01   .2128693E-01
   .1856081E-01   .1470208E-01   .9734759E-02   .2939064E-02  -.5726208E-02
  -.1494042E-01  -.2277651E-01  -.2740698E-01  -.2770588E-01  -.2400597E-01
  -.1811454E-01  -.1235972E-01  -.7902978E-02  -.4074138E-02   .9223859E-03
   .8482535E-02   .1820593E-01   .2798184E-01   .3554722E-01   .3962142E-01
   .3955375E-01   .3533789E-01   .2727270E-01   .1531891E-01  -.6753758E-04
  -.1710243E-01  -.3284972E-01  -.4496679E-01  -.5279519E-01  -.5689898E-01
  -.5724843E-01  -.5249722E-01  -.4170335E-01  -.2699335E-01  -.1281970E-01
  -.2142404E-02   .4733361E-02   .9014786E-02   .1082963E-01   .8931222E-02
   .3236062E-02  -.4010094E-02  -.9482353E-02  -.1133526E-01  -.9988333E-02
  -.6473358E-02  -.1511249E-02   .4658154E-02   .1202493E-01   .1947317E-01
   .2493325E-01   .2597257E-01   .2189078E-01   .1473241E-01   .8277999E-02
   .5746598E-02   .7526406E-02   .1168160E-01   .1588055E-01   .1839717E-01
   .1874131E-01   .1733122E-01   .1490420E-01   .1199631E-01   .8548913E-02
   .4275191E-02  -.9771749E-03  -.7299604E-02  -.1408119E-01  -.1969077E-01
  -.2223109E-01  -.2052114E-01  -.1536322E-01  -.8706706E-02  -.2077540E-02
   .3916895E-02   .9249011E-02   .1314223E-01   .1382894E-01   .9982275E-02
   .2219300E-02  -.7511142E-02  -.1708928E-01  -.2482504E-01  -.2966684E-01
  -.3100459E-01  -.2860365E-01  -.2270669E-01  -.1402422E-01  -.3579802E-02
   .6877614E-02   .1524552E-01   .1997270E-01   .2053018E-01   .1788292E-01
   .1433626E-01   .1189675E-01   .1121655E-01   .1169034E-01   .1252800E-01
   .1359331E-01   .1519062E-01   .1645518E-01   .1487010E-01   .8755894E-02
  -.1271335E-02  -.1250406E-01  -.2202195E-01  -.2827674E-01  -.3105693E-01
  -.3063391E-01  -.2621035E-01  -.1660797E-01  -.3384040E-02   .9161989E-02
   .1693513E-01   .1826191E-01   .1456517E-01   .8223434E-02   .3006734E-03
  -.8593120E-02  -.1693468E-01  -.2330217E-01  -.2708241E-01  -.2819950E-01
  -.2658293E-01  -.2139277E-01  -.1169206E-01   .2057962E-02   .1751718E-01
   .3107356E-01   .3996295E-01   .4369637E-01   .4273064E-01   .3708925E-01
   .2624585E-01   .1099091E-01  -.5073657E-02  -.1765293E-01  -.2484961E-01
  -.2736209E-01  -.2641111E-01  -.2288433E-01  -.1789632E-01  -.1285262E-01
  -.9251081E-02  -.8308520E-02  -.9696467E-02  -.1133838E-01  -.1074330E-01
  -.6154707E-02   .2199055E-02   .1218220E-01   .2143085E-01   .2837083E-01
   .3196349E-01   .3137346E-01   .2634415E-01   .1805565E-01   .9198561E-02
   .2544822E-02  -.8917075E-03  -.2063850E-02  -.2284409E-02  -.1742908E-02
  -.7175735E-04   .2131570E-02   .3764266E-02   .4407938E-02   .4380503E-02
   .4328994E-02   .4277291E-02   .3114918E-02  -.3061547E-03  -.5964321E-02
  -.1253684E-01  -.1779994E-01  -.1985945E-01  -.1837204E-01  -.1433622E-01
  -.9377449E-02  -.5098927E-02  -.2859151E-02  -.3623458E-02  -.7226914E-02
  -.1224000E-01  -.1693639E-01  -.2042874E-01  -.2286573E-01  -.2443014E-01
  -.2470134E-01  -.2297697E-01  -.1891546E-01  -.1301023E-01  -.6497251E-02
  -.8574654E-03   .2883308E-02   .4392377E-02   .4126868E-02   .3487423E-02
   .4122290E-02   .6572189E-02   .1020971E-01   .1380820E-01   .1615783E-01
   .1694755E-01   .1679083E-01   .1669076E-01   .1732676E-01   .1862845E-01
   .1972897E-01   .1958939E-01   .1818249E-01   .1670411E-01   .1620085E-01
   .1592947E-01   .1398058E-01   .9415849E-02   .3079963E-02  -.3270811E-02
  -.8159114E-02  -.1068615E-01  -.1087202E-01  -.9907351E-02  -.9324886E-02
  -.9981645E-02  -.1202570E-01  -.1481227E-01  -.1716378E-01  -.1767491E-01
  -.1522817E-01  -.1021389E-01  -.4353376E-02   .5875580E-03   .3527611E-02
   .4314728E-02   .2966181E-02  -.4704422E-03  -.5414783E-02  -.1033142E-01
  -.1323191E-01  -.1293930E-01  -.9297583E-02  -.2602838E-02   .6258489E-02
   .1579949E-01   .2492572E-01   .3265989E-01   .3768892E-01   .3895762E-01
   .3598560E-01   .2884567E-01   .1933286E-01   .1047544E-01   .4763360E-02
   .3459269E-02   .6145349E-02   .1108064E-01   .1591741E-01   .1913799E-01
   .2033069E-01   .1942186E-01   .1592182E-01   .8408025E-02  -.3838932E-02
  -.1882651E-01  -.3285191E-01  -.4293802E-01  -.4773727E-01  -.4718237E-01
  -.4238992E-01  -.3572206E-01  -.2972447E-01  -.2532370E-01  -.2126125E-01
  -.1598795E-01  -.9277612E-02  -.2023775E-02   .4710717E-02   .1026481E-01
   .1419546E-01   .1627482E-01   .1638906E-01   .1447225E-01   .1146510E-01
   .9290311E-02   .9531597E-02   .1255988E-01   .1730962E-01   .2199086E-01
   .2501695E-01   .2548120E-01   .2324911E-01   .1801318E-01   .9104172E-02
  -.3035837E-02  -.1653054E-01  -.2900542E-01  -.3879723E-01  -.4506711E-01
  -.4716828E-01  -.4477383E-01  -.3805870E-01  -.2698194E-01  -.1205657E-01
   .4392398E-02   .1927375E-01   .3033982E-01   .3684789E-01   .3947921E-01
   .3934163E-01   .3669308E-01   .3147661E-01   .2421814E-01   .1539006E-01
   .4859338E-02  -.7478370E-02  -.2033681E-01  -.3105481E-01  -.3712321E-01
  -.3710454E-01  -.3093456E-01  -.1970517E-01  -.5541278E-02   .8379680E-02
   .1873148E-01   .2342606E-01   .2226355E-01   .1656395E-01   .8654137E-02
   .3643173E-03  -.7615546E-02  -.1473095E-01  -.1988549E-01  -.2188917E-01
  -.2019201E-01  -.1552317E-01  -.9671163E-02  -.4360695E-02  -.5981167E-04
   .3820387E-02   .7894427E-02   .1184041E-01   .1427153E-01   .1450545E-01
   .1348893E-01   .1298495E-01   .1424061E-01   .1664771E-01   .1823817E-01
   .1732628E-01   .1301552E-01   .5513954E-02  -.3535218E-02  -.1218464E-01
  -.1976422E-01  -.2664557E-01  -.3287365E-01  -.3726993E-01  -.3767691E-01
  -.3296601E-01  -.2422808E-01  -.1384406E-01  -.4532172E-02   .1885277E-02
   .4767654E-02   .4559788E-02   .2749475E-02   .1058286E-02   .2381762E-03
   .1537243E-03   .7797039E-03   .3151280E-02   .8612358E-02   .1676718E-01
   .2542243E-01   .3227411E-01   .3616763E-01   .3678568E-01   .3442982E-01
   .2943000E-01   .2191039E-01   .1262636E-01   .2698993E-02  -.7090073E-02
  -.1623159E-01  -.2395087E-01  -.2935025E-01  -.3216193E-01  -.3298476E-01
  -.3260017E-01  -.3113221E-01  -.2821834E-01  -.2365075E-01  -.1789972E-01
  -.1198328E-01  -.7448969E-02  -.6051191E-02  -.8742148E-02  -.1477827E-01
  -.2220127E-01  -.2914566E-01  -.3417819E-01  -.3666321E-01  -.3696780E-01
  -.3593713E-01  -.3399413E-01  -.3090762E-01  -.2642417E-01  -.2100991E-01
  -.1531149E-01  -.1005495E-01  -.6174144E-02  -.4084904E-02  -.3384617E-02
  -.2902188E-02  -.1743583E-02   .1145283E-03   .2710886E-02   .6617065E-02
   .1245100E-01   .1959589E-01   .2631050E-01   .3095161E-01   .3318235E-01
   .3412776E-01   .3537678E-01   .3751893E-01   .3962646E-01   .3987669E-01
   .3693873E-01   .3116095E-01   .2421615E-01   .1792985E-01   .1336987E-01
   .1091674E-01   .1060397E-01   .1167002E-01   .1212084E-01   .9860106E-02
   .4039127E-02  -.4668672E-02  -.1498554E-01  -.2625680E-01  -.3820272E-01
  -.5028999E-01  -.6102007E-01  -.6791968E-01  -.6882168E-01  -.6295809E-01
  -.5125613E-01  -.3576573E-01  -.1889094E-01  -.2839563E-02   .1058289E-01
   .2033108E-01   .2598065E-01   .2723871E-01   .2454461E-01   .1985527E-01
   .1552154E-01   .1300952E-01   .1290283E-01   .1512724E-01   .1957310E-01
   .2606373E-01   .3303295E-01   .3723869E-01   .3635443E-01   .3096809E-01
   .2353928E-01   .1685275E-01   .1216970E-01   .8824658E-02   .5705310E-02
   .2210912E-02  -.1075217E-02  -.3420674E-02  -.4525041E-02  -.4757554E-02
  -.5200912E-02  -.7085474E-02  -.1072023E-01  -.1540677E-01  -.2018028E-01
  -.2488164E-01  -.2951524E-01  -.3354255E-01  -.3583659E-01  -.3530558E-01
  -.3166964E-01  -.2549444E-01  -.1750423E-01  -.8660829E-02  -.4714786E-03
   .6014285E-02   .1025911E-01   .1200790E-01   .1134762E-01   .8271170E-02
   .3386627E-02  -.1316027E-02  -.3503984E-02  -.2141231E-02   .1201489E-02
   .4095664E-02   .4783091E-02   .2893023E-02  -.9738058E-03  -.6029908E-02
  -.1129563E-01  -.1530354E-01  -.1714221E-01  -.1613137E-01  -.1146828E-01
  -.2707990E-02   .8932282E-02   .2107378E-01   .3095214E-01   .3685095E-01
   .3865478E-01   .3691708E-01   .3186311E-01   .2412642E-01   .1528145E-01
   .6895027E-02   .3158905E-03  -.3471975E-02  -.4404870E-02  -.3446384E-02
  -.1468459E-02   .1505163E-02   .5656053E-02   .1128978E-01   .1775982E-01
   .2350389E-01   .2700074E-01   .2741288E-01   .2471733E-01   .1885913E-01
   .9594593E-02  -.1864691E-02  -.1354883E-01  -.2352925E-01  -.2992636E-01
  -.3110969E-01  -.2639453E-01  -.1715388E-01  -.6760046E-02   .1545693E-02
   .6944937E-02   .1087308E-01   .1506833E-01   .2017964E-01   .2542838E-01
   .2914591E-01   .3015943E-01   .2823968E-01   .2403053E-01   .1875038E-01
   .1373665E-01   .9823704E-02   .7071365E-02   .5242257E-02   .4150041E-02
   .3543523E-02   .2823735E-02   .1128599E-02  -.1645573E-02  -.3677544E-02
  -.2690594E-02   .1332981E-02   .6469085E-02   .1008568E-01   .1075773E-01
   .8644108E-02   .5081477E-02   .1586924E-02  -.8608530E-03  -.1883277E-02
  -.1545738E-02  -.1782467E-03   .1217242E-02   .1330295E-02  -.2220151E-03
  -.2868219E-02  -.5830164E-02  -.8515357E-02  -.1015666E-01  -.9880054E-02
  -.6889869E-02  -.1027486E-02   .6737780E-02   .1488942E-01   .2217063E-01
   .2807403E-01   .3213314E-01   .3367447E-01   .3276063E-01   .3036449E-01
   .2779997E-01   .2615270E-01   .2590914E-01   .2681990E-01   .2799746E-01
   .2833819E-01   .2677620E-01   .2289435E-01   .1697942E-01   .9602689E-02
   .1205492E-02  -.7975641E-02  -.1697299E-01  -.2420828E-01  -.2824709E-01
  -.2846135E-01  -.2562305E-01  -.2102256E-01  -.1571273E-01  -.1134706E-01
  -.1022107E-01  -.1355013E-01  -.2045854E-01  -.2878651E-01  -.3641169E-01
  -.4173169E-01  -.4351432E-01  -.4120544E-01  -.3499582E-01  -.2593337E-01
  -.1538569E-01  -.4708351E-02   .4196331E-02   .1000478E-01   .1263611E-01
   .1256283E-01   .1029505E-01   .6683074E-02   .3385003E-02   .2343102E-02
   .4554767E-02   .9095302E-02   .1388707E-01   .1745384E-01   .1943503E-01
   .2018479E-01   .1999288E-01   .1930861E-01   .1860833E-01   .1788960E-01
   .1708156E-01   .1636937E-01   .1550541E-01   .1325378E-01   .8449098E-02
   .1372487E-02  -.6507481E-02  -.1378870E-01  -.2003338E-01  -.2501767E-01
  -.2798839E-01  -.2742520E-01  -.2202935E-01  -.1200287E-01   .4015462E-03
   .1101509E-01   .1583253E-01   .1327921E-01   .4617279E-02  -.7080047E-02
  -.1908651E-01  -.2976461E-01  -.3863886E-01  -.4575473E-01  -.5061095E-01
  -.5245216E-01  -.5057180E-01  -.4465216E-01  -.3567450E-01  -.2514920E-01
  -.1424008E-01  -.3739218E-02   .5424096E-02   .1250459E-01   .1688515E-01
   .1808084E-01   .1584022E-01   .1100389E-01   .5083136E-02  -.9154633E-04
  -.3481905E-02  -.5388370E-02  -.6165190E-02  -.5599660E-02  -.3470118E-02
  -.7794212E-04   .3878393E-02   .7522707E-02   .1021701E-01   .1195862E-01
   .1318577E-01   .1416388E-01   .1449425E-01   .1371199E-01   .1190564E-01
   .9137069E-02   .5466616E-02   .9965264E-03  -.3806755E-02  -.7736569E-02
  -.9686101E-02  -.9080507E-02  -.5859087E-02  -.4427601E-03   .6333707E-02
   .1320285E-01   .1926688E-01   .2426439E-01   .2838950E-01   .3177753E-01
   .3402320E-01   .3401527E-01   .3111758E-01   .2565833E-01   .1854983E-01
   .1097780E-01   .3762574E-02  -.2711891E-02  -.7916990E-02  -.1173427E-01
  -.1465840E-01  -.1721494E-01  -.1926615E-01  -.1999759E-01  -.1897408E-01
  -.1661257E-01  -.1392582E-01  -.1148490E-01  -.9357096E-02  -.8025838E-02
  -.7557305E-02  -.6930212E-02  -.4958593E-02  -.1176379E-02   .3894870E-02
   .8858886E-02   .1244291E-01   .1439209E-01   .1511924E-01   .1522434E-01
   .1511798E-01   .1444175E-01   .1244482E-01   .8629556E-02   .3889391E-02
  -.3403672E-03  -.3049581E-02  -.3315983E-02  -.1286051E-02   .1807329E-02
   .4545220E-02   .5957986E-02   .5817537E-02   .4660049E-02   .3461803E-02
   .2901121E-02   .2942384E-02   .3035851E-02   .3155677E-02   .3703573E-02
   .5151738E-02   .8076847E-02   .1250141E-01   .1743618E-01   .2113318E-01
   .2223399E-01   .2000743E-01   .1505546E-01   .8847145E-02   .3278571E-02
  -.2184084E-03  -.9792862E-03   .1576698E-02   .6706581E-02   .1240592E-01
   .1686068E-01   .1889913E-01   .1829626E-01   .1549881E-01   .1155403E-01
   .7437313E-02   .3950929E-02   .2081490E-02   .2391843E-02   .4867067E-02
   .8591909E-02   .1201339E-01   .1406586E-01   .1492688E-01   .1568763E-01
   .1704289E-01   .1875337E-01   .1972907E-01   .1868167E-01   .1481525E-01
   .8360591E-02   .1058562E-02  -.5200987E-02  -.9853192E-02  -.1333824E-01
  -.1665287E-01  -.2033200E-01  -.2389497E-01  -.2691542E-01  -.2947820E-01
  -.3167190E-01  -.3346296E-01  -.3477181E-01  -.3570469E-01  -.3643686E-01
  -.3711458E-01  -.3773365E-01  -.3793820E-01  -.3727569E-01  -.3551896E-01
  -.3293752E-01  -.3004146E-01  -.2732936E-01  -.2484982E-01  -.2203263E-01
  -.1850832E-01  -.1420929E-01  -.9236878E-02  -.4184231E-02   .2807656E-03
   .4279157E-02   .8669857E-02   .1416965E-01   .2013130E-01   .2502852E-01
   .2749993E-01   .2746375E-01   .2594192E-01   .2392829E-01   .2163449E-01
   .1904331E-01   .1703040E-01   .1706536E-01   .1990281E-01   .2524765E-01
   .3176091E-01   .3749852E-01   .4051059E-01   .3958513E-01   .3458482E-01
   .2640925E-01   .1698145E-01   .8906084E-02   .4236112E-02   .3659673E-02
   .6416671E-02   .1050211E-01   .1344624E-01   .1358924E-01   .1053461E-01
   .5204673E-02  -.9614047E-03  -.6631494E-02  -.1136060E-01  -.1521496E-01
  -.1895493E-01  -.2390434E-01  -.3111961E-01  -.3983754E-01  -.4815792E-01
  -.5393512E-01  -.5531396E-01  -.5188233E-01  -.4505271E-01  -.3691385E-01
  -.2874652E-01  -.2139730E-01  -.1541263E-01  -.1100899E-01  -.8017389E-02
  -.6192232E-02  -.4921542E-02  -.3648699E-02  -.2078471E-02   .8938302E-04
   .3307748E-02   .7436814E-02   .1189347E-01   .1622470E-01   .2013899E-01
   .2318123E-01   .2513466E-01   .2589399E-01   .2515071E-01   .2278440E-01
   .1931300E-01   .1585564E-01   .1367045E-01   .1333951E-01   .1444890E-01
   .1611269E-01   .1756813E-01   .1826692E-01   .1805152E-01   .1757192E-01
   .1781034E-01   .1889704E-01   .2061392E-01   .2224036E-01   .2248167E-01
   .2047710E-01   .1549374E-01   .7477467E-02  -.1940753E-02  -.1007713E-01
  -.1469840E-01  -.1483542E-01  -.1068624E-01  -.3650420E-02   .4273116E-02
   .1169909E-01   .1719184E-01   .1965406E-01   .1928877E-01   .1664468E-01
   .1228752E-01   .6593173E-02   .3409145E-03  -.5266959E-02  -.8982163E-02
  -.1048476E-01  -.1050300E-01  -.9824422E-02  -.8965659E-02  -.8496095E-02
  -.8288913E-02  -.7184535E-02  -.4294378E-02   .2157123E-03   .5392695E-02
   .1002107E-01   .1322973E-01   .1458071E-01   .1419738E-01   .1253366E-01
   .9758855E-02   .6198806E-02   .2190014E-02  -.2111296E-02  -.6449305E-02
  -.1058122E-01  -.1381326E-01  -.1513510E-01  -.1343535E-01  -.8476841E-02
  -.1343416E-02   .6306290E-02   .1223092E-01   .1461112E-01   .1344238E-01
   .9937060E-02   .5707736E-02   .2001038E-02  -.1252786E-02  -.4580444E-02
  -.8347756E-02  -.1253688E-01  -.1700462E-01  -.2179565E-01  -.2646983E-01
  -.3041895E-01  -.3344272E-01  -.3515779E-01  -.3480630E-01  -.3200493E-01
  -.2698834E-01  -.2013410E-01  -.1207986E-01  -.3941999E-02   .3053016E-02
   .8137815E-02   .1126825E-01   .1280671E-01   .1308307E-01   .1224345E-01
   .1048671E-01   .8388980E-02   .6785275E-02   .6344474E-02   .7297510E-02
   .9136657E-02   .1079088E-01   .1130562E-01   .1027194E-01   .7924513E-02
   .4687118E-02   .6778403E-03  -.4243164E-02  -.9832690E-02  -.1510459E-01
  -.1898681E-01  -.2097570E-01  -.2106113E-01  -.2004689E-01  -.1934062E-01
  -.1978423E-01  -.2133467E-01  -.2392709E-01  -.2723882E-01  -.3017671E-01
  -.3104931E-01  -.2792061E-01  -.2010011E-01  -.9137040E-02   .1940976E-02
   .1042467E-01   .1504122E-01   .1604612E-01   .1457398E-01   .1134782E-01
   .6629049E-02   .1004635E-02  -.4731403E-02  -.9776125E-02  -.1363755E-01
  -.1621293E-01  -.1717453E-01  -.1623775E-01  -.1334746E-01  -.8329418E-02
  -.1075266E-02   .7383672E-02   .1465991E-01   .1901325E-01   .2036679E-01
   .1989427E-01   .1913056E-01   .1889030E-01   .1897037E-01   .1871401E-01
   .1774598E-01   .1599318E-01   .1366065E-01   .1153023E-01   .1055505E-01
   .1100266E-01   .1236543E-01   .1374517E-01   .1440494E-01   .1390660E-01
   .1233775E-01   .1014811E-01   .7597044E-02   .4512471E-02   .9089655E-03
  -.2921754E-02  -.6868111E-02  -.1082227E-01  -.1432655E-01  -.1688217E-01
  -.1837672E-01  -.1924715E-01  -.2033344E-01  -.2199613E-01  -.2387407E-01
  -.2524768E-01  -.2510075E-01  -.2280872E-01  -.1849679E-01  -.1310292E-01
  -.7917387E-02  -.3847765E-02  -.1669472E-02  -.1993158E-02  -.4593454E-02
  -.8271984E-02  -.1170807E-01  -.1397710E-01  -.1480540E-01  -.1451338E-01
  -.1378739E-01  -.1330999E-01  -.1322292E-01  -.1285173E-01  -.1119478E-01
  -.7668085E-02  -.2128140E-02   .5016013E-02   .1253729E-01   .1902192E-01
   .2379399E-01   .2729459E-01   .3034660E-01   .3337039E-01   .3641228E-01
   .3913813E-01   .4090992E-01   .4089698E-01   .3886360E-01   .3522853E-01
   .3053282E-01   .2558772E-01   .2125088E-01   .1792835E-01   .1577239E-01
   .1475056E-01   .1443150E-01   .1407741E-01   .1289676E-01   .1024771E-01
   .6209823E-02   .1633153E-02  -.2446363E-02  -.4891461E-02  -.5022949E-02
  -.3396047E-02  -.1247201E-02   .6890868E-03   .1962372E-02   .1732890E-02
  -.6233293E-03  -.5457376E-02  -.1248162E-01  -.2017263E-01  -.2662746E-01
  -.2990128E-01  -.2893593E-01  -.2463292E-01  -.1912209E-01  -.1431336E-01
  -.1078073E-01  -.8279155E-02  -.6533275E-02  -.5539483E-02  -.5296951E-02
  -.5637536E-02  -.6387492E-02  -.7005517E-02  -.7051335E-02  -.6486562E-02
  -.5421645E-02  -.4083979E-02  -.2654581E-02  -.1065921E-02   .6608935E-03
   .2110257E-02   .2952225E-02   .3414632E-02   .3809924E-02   .4148721E-02
   .4343362E-02   .4197132E-02   .3732185E-02   .3232532E-02   .2730316E-02
   .2181448E-02   .1517660E-02   .5261502E-03  -.1152897E-02  -.3198540E-02
  -.4558858E-02  -.5028252E-02  -.5309318E-02  -.5968816E-02  -.7104702E-02
  -.8370309E-02  -.9245283E-02  -.9532741E-02  -.9241931E-02  -.8374226E-02
  -.6919288E-02  -.4691029E-02  -.1573543E-02   .2068762E-02   .5572292E-02
   .8422586E-02   .1028494E-01   .1127949E-01   .1188896E-01   .1247996E-01
   .1318713E-01   .1358740E-01   .1302798E-01   .1105943E-01   .7731625E-02
   .3488302E-02  -.8115393E-03  -.3877971E-02  -.5001328E-02  -.4401157E-02
  -.2936312E-02  -.1565983E-02  -.8893404E-03  -.7288218E-03  -.5804551E-03
  -.3061107E-03  -.2165579E-04  -.2918472E-04  -.7587379E-03  -.2427480E-02
  -.5092574E-02  -.8558935E-02  -.1181391E-01  -.1415248E-01  -.1563874E-01
  -.1674910E-01  -.1779415E-01  -.1878291E-01  -.1983537E-01  -.2089527E-01
  -.2140299E-01  -.2075267E-01  -.1903033E-01  -.1631069E-01  -.1216480E-01
  -.6199302E-02   .1035753E-02   .8198987E-02   .1405043E-01   .1738420E-01
   .1749066E-01   .1457245E-01   .9254907E-02   .2431786E-02  -.4785134E-02
  -.1132238E-01  -.1599560E-01  -.1793141E-01  -.1687443E-01  -.1327330E-01
  -.8316831E-02  -.3961791E-02  -.1761913E-02  -.2294516E-02  -.5100248E-02
  -.9076488E-02  -.1295622E-01  -.1538682E-01  -.1551066E-01  -.1308732E-01
  -.8804832E-02  -.3603778E-02   .1386029E-02   .5670776E-02   .8708600E-02
   .9825369E-02   .8751690E-02   .5739928E-02   .1934423E-02  -.1356320E-02
  -.2961423E-02  -.2041052E-02   .1185563E-02   .5711742E-02   .1011892E-01
   .1348302E-01   .1554096E-01   .1636095E-01   .1614121E-01   .1522392E-01
   .1398377E-01   .1269207E-01   .1144007E-01   .1017632E-01   .8564560E-02
   .6323085E-02   .3341044E-02  -.2676771E-04  -.3231331E-02  -.5718992E-02
  -.7102380E-02  -.7357661E-02  -.6239629E-02  -.3779488E-02  -.1088766E-03
   .4519533E-02   .9391212E-02   .1365683E-01   .1687415E-01   .1870658E-01
   .1869865E-01   .1664973E-01   .1278737E-01   .7699021E-02   .1842423E-02
  -.4463974E-02  -.1069528E-01  -.1614527E-01  -.2011851E-01  -.2253509E-01
  -.2394181E-01  -.2477057E-01  -.2519753E-01  -.2516784E-01  -.2448574E-01
  -.2287152E-01  -.2051956E-01  -.1815151E-01  -.1613564E-01  -.1486755E-01
  -.1478802E-01  -.1571147E-01  -.1685023E-01  -.1724576E-01  -.1626416E-01
  -.1380007E-01  -.1041279E-01  -.6819575E-02  -.3696130E-02  -.1747399E-02
  -.1363384E-02  -.2690272E-02  -.5345790E-02  -.8535163E-02  -.1202425E-01
  -.1583632E-01  -.1933326E-01  -.2137266E-01  -.2100720E-01  -.1801520E-01
  -.1287912E-01  -.6439736E-02   .5925601E-03   .7516462E-02   .1355824E-01
   .1844312E-01   .2226952E-01   .2528489E-01   .2762408E-01   .2905070E-01
   .2943554E-01   .2884193E-01   .2744511E-01   .2539055E-01   .2306019E-01
   .2101023E-01   .1961579E-01   .1894527E-01   .1841382E-01   .1713004E-01
   .1466440E-01   .1107200E-01   .6711632E-02   .2146745E-02  -.2163522E-02
  -.6245238E-02  -.1022882E-01  -.1444882E-01  -.1883055E-01  -.2277546E-01
  -.2507544E-01  -.2470265E-01  -.2162094E-01  -.1636625E-01  -.9840155E-02
  -.3147902E-02   .3116702E-02   .8436590E-02   .1214252E-01   .1392250E-01
   .1388499E-01   .1177757E-01   .7546154E-02   .2058461E-02  -.3284467E-02
  -.6845174E-02  -.7553255E-02  -.5310790E-02  -.1044381E-02   .3663139E-02
   .7536753E-02   .1009235E-01   .1139725E-01   .1193433E-01   .1195241E-01
   .1168308E-01   .1125810E-01   .1117490E-01   .1212039E-01   .1422575E-01
   .1717421E-01   .2055729E-01   .2358240E-01   .2540344E-01   .2578474E-01
   .2462053E-01   .2161219E-01   .1687766E-01   .1076491E-01   .3830489E-02
  -.2903373E-02  -.8503569E-02  -.1261098E-01  -.1542971E-01  -.1708584E-01
  -.1763004E-01  -.1701348E-01  -.1541956E-01  -.1287963E-01  -.9576482E-02
  -.6162337E-02  -.3397931E-02  -.1612756E-02  -.8647721E-03  -.1120481E-02
  -.2185318E-02  -.3921328E-02  -.5911005E-02  -.7100798E-02  -.6814601E-02
  -.4987762E-02  -.1885773E-02   .1970795E-02   .5952412E-02   .9332744E-02
   .1139897E-01   .1192189E-01   .1084946E-01   .8301590E-02   .4723934E-02
   .6693354E-03  -.3448680E-02  -.6942862E-02  -.9370233E-02  -.1094358E-01
  -.1218367E-01  -.1356658E-01  -.1564171E-01  -.1824802E-01  -.2090332E-01
  -.2308574E-01  -.2408388E-01  -.2362135E-01  -.2190278E-01  -.1935084E-01
  -.1623145E-01  -.1265216E-01  -.8782077E-02  -.5055875E-02  -.1893640E-02
   .2236123E-03   .1099484E-02   .8644125E-03  -.1081284E-03  -.1282194E-02
  -.1802153E-02  -.9174354E-03   .1537200E-02   .4850919E-02   .7816586E-02
   .9476882E-02   .9475675E-02   .7964672E-02   .5429336E-02   .2243015E-02
  -.9090633E-03  -.3049612E-02  -.3605297E-02  -.2558875E-02  -.3231423E-03
   .2607346E-02   .5552671E-02   .7824190E-02   .9122788E-02   .9525517E-02
   .9190157E-02   .8058985E-02   .6116122E-02   .3598017E-02   .8758338E-03
  -.1599230E-02  -.3505285E-02  -.4735165E-02  -.5505705E-02  -.6080554E-02
  -.6514211E-02  -.6985743E-02  -.7512701E-02  -.7676138E-02  -.7136824E-02
  -.6007878E-02  -.4823459E-02  -.4100519E-02  -.3922101E-02  -.3977737E-02
  -.3561326E-02  -.2137287E-02   .1754400E-03   .2931270E-02   .5555131E-02
   .7444974E-02   .8481119E-02   .9031211E-02   .9338171E-02   .9534551E-02
   .9697912E-02   .9993194E-02   .1052975E-01   .1120878E-01   .1188695E-01
   .1202832E-01   .1145952E-01   .1054463E-01   .9286899E-02   .8020227E-02
   .7229903E-02   .7186599E-02   .7910293E-02   .8944190E-02   .9481027E-02
   .8841603E-02   .6877160E-02   .3780877E-02   .1113885E-03  -.3139856E-02
  -.5388003E-02  -.6307351E-02  -.6084520E-02  -.5345400E-02  -.4450093E-02
  -.3728200E-02  -.3715899E-02  -.4433322E-02  -.5388473E-02  -.6105428E-02
  -.5905580E-02  -.4399910E-02  -.1757954E-02   .1582822E-02   .4952440E-02
   .7818910E-02   .9791672E-02   .1070756E-01   .1046897E-01   .8684239E-02
   .5350439E-02   .1065437E-02  -.2949290E-02  -.5771615E-02  -.7277737E-02
  -.7659610E-02  -.7139400E-02  -.5943567E-02  -.4256778E-02  -.2479606E-02
  -.9155376E-03   .2958429E-03   .1011329E-02   .1278240E-02   .1302586E-02
   .1282431E-02   .1309080E-02   .1374667E-02   .1447273E-02   .1637868E-02
   .2354384E-02   .3946481E-02   .6086679E-02   .7915817E-02   .8793303E-02
   .8008950E-02   .5486917E-02   .1936704E-02  -.1976592E-02  -.5580271E-02
  -.8330221E-02  -.9665226E-02  -.9594483E-02  -.8227825E-02  -.5717035E-02
  -.2740378E-02  -.1707378E-03   .1549955E-02   .2362064E-02   .2456572E-02
   .2049740E-02   .1550246E-02   .1287679E-02   .1295346E-02   .1422563E-02
   .1515358E-02   .1506613E-02   .1330455E-02   .6913572E-03  -.7586429E-03
  -.2935151E-02  -.5127590E-02  -.6542600E-02  -.6805328E-02  -.5746073E-02
  -.3669651E-02  -.1320554E-02   .8790036E-03   .2724858E-02   .4130573E-02
   .4990079E-02   .5256268E-02   .4855307E-02   .3776514E-02   .2006007E-02
  -.2385181E-03  -.2343382E-02  -.3663975E-02  -.3918829E-02  -.3093815E-02
  -.1809824E-02  -.5712508E-03   .4520715E-03   .1091782E-02   .1353654E-02
   .1471842E-02   .1703784E-02   .1817965E-02   .1615285E-02   .9649896E-03
  -.1278168E-03  -.1577382E-02  -.3375228E-02  -.5258790E-02  -.6774322E-02
  -.7398037E-02  -.7150292E-02  -.6289543E-02  -.5086684E-02  -.3769275E-02
  -.2458228E-02  -.1185599E-02   .8850893E-05   .9865190E-03   .1881111E-02
   .2853280E-02   .3873316E-02   .5179344E-02   .6780436E-02   .8448390E-02
   .1009217E-01   .1193550E-01   .1408165E-01   .1604103E-01   .1686333E-01
   .1597551E-01   .1368629E-01   .1086369E-01   .8593459E-02   .7799045E-02
   .8601265E-02   .1040248E-01   .1205905E-01   .1273993E-01   .1224760E-01
   .1085433E-01   .8927785E-02   .6983574E-02   .5448186E-02   .4569155E-02
   .4118705E-02   .3428986E-02   .2501493E-02   .1840526E-02   .1949364E-02
   .2987414E-02   .4806863E-02   .6865313E-02   .8586078E-02   .9661788E-02
   .1029930E-01   .1070334E-01   .1095189E-01   .1110657E-01   .1129191E-01
   .1178612E-01   .1272657E-01   .1382312E-01   .1422837E-01   .1324344E-01
   .1095271E-01   .7982080E-02   .4800511E-02   .1317237E-02  -.2238584E-02
  -.5521353E-02  -.8443847E-02  -.1096535E-01  -.1280103E-01  -.1389850E-01
  -.1428780E-01  -.1444517E-01  -.1477128E-01  -.1552095E-01  -.1679304E-01
  -.1849680E-01  -.2008260E-01  -.2114264E-01  -.2137303E-01  -.2075085E-01
  -.1905716E-01  -.1636852E-01  -.1293722E-01  -.9054086E-02  -.5083809E-02
  -.1561849E-02   .1058605E-02   .2638268E-02   .3042499E-02   .2491743E-02
   .1704220E-02   .1257180E-02   .1262941E-02   .1681637E-02   .2797947E-02
   .4672747E-02   .6808234E-02   .8766044E-02   .1049405E-01   .1175760E-01
   .1247478E-01   .1297241E-01   .1331179E-01   .1317723E-01   .1240236E-01
   .1104007E-01   .9018388E-02   .6320690E-02   .3487295E-02   .9528591E-03
  -.1065296E-02  -.2439501E-02  -.2948255E-02  -.2829293E-02  -.2675360E-02
  -.3057600E-02  -.4125107E-02  -.5619068E-02  -.7260018E-02  -.9030847E-02
  -.1070596E-01  -.1175928E-01  -.1176952E-01  -.1082231E-01  -.9372024E-02
  -.7848155E-02  -.6370062E-02  -.4743255E-02  -.3015748E-02  -.1445532E-02
  -.2966504E-03   .5125577E-03   .1053855E-02   .1437160E-02   .2012622E-02
   .2998329E-02   .4230481E-02   .5323009E-02   .6174760E-02   .6626815E-02
   .6304471E-02   .4999287E-02   .3039559E-02   .7535552E-03  -.1715990E-02
  -.4222149E-02  -.6547379E-02  -.8795519E-02  -.1118679E-01  -.1371870E-01
  -.1605097E-01  -.1784033E-01  -.1886164E-01  -.1919096E-01  -.1906784E-01
  -.1861261E-01  -.1794237E-01  -.1683712E-01  -.1531827E-01  -.1360246E-01
  -.1169922E-01  -.9615792E-02  -.7185834E-02  -.4717199E-02  -.2731415E-02
  -.1590049E-02  -.1240592E-02  -.1394099E-02  -.1862204E-02  -.2265844E-02
  -.2178198E-02  -.1715244E-02  -.1275316E-02  -.1073832E-02  -.1152472E-02
  -.1584899E-02  -.2218937E-02  -.2995248E-02  -.3947992E-02  -.4859213E-02
  -.5661748E-02  -.6236084E-02  -.6266943E-02  -.5859352E-02  -.5376931E-02
  -.4854602E-02  -.4312879E-02  -.3644230E-02  -.2720479E-02  -.1766445E-02
  -.9176941E-03  -.3348981E-03  -.3226783E-03  -.7273872E-03  -.1085348E-02
  -.9572001E-03  -.3297947E-03   .8672998E-03   .2501240E-02   .4193302E-02
   .5658781E-02   .6616703E-02   .7009421E-02   .7045752E-02   .6968509E-02
   .6935925E-02   .6999000E-02   .7110208E-02   .7192435E-02   .7213853E-02
   .7190202E-02   .7154385E-02   .7132076E-02   .7122580E-02   .7022712E-02
   .6352954E-02   .4885168E-02   .2458270E-02  -.8796736E-03  -.4466322E-02
  -.7470012E-02  -.9701935E-02  -.1111915E-01  -.1170830E-01  -.1149485E-01
  -.1061759E-01  -.9362991E-02  -.7990507E-02  -.6637797E-02  -.5372385E-02
  -.4466896E-02  -.4324421E-02  -.4993943E-02  -.5923354E-02  -.6509392E-02
  -.6550227E-02  -.5991053E-02  -.4914031E-02  -.3560250E-02  -.2190551E-02
  -.1168030E-02  -.6412531E-03  -.2115452E-03   .6241547E-03   .2137804E-02
   .3917141E-02   .5670886E-02   .7102802E-02   .8168124E-02   .9221438E-02
   .1067070E-01   .1222255E-01   .1328574E-01   .1362227E-01   .1314535E-01
   .1180035E-01   .9963031E-02   .8216662E-02   .7072519E-02   .6664585E-02
   .6736701E-02   .6919193E-02   .6979370E-02   .6850353E-02   .6429023E-02
   .5870467E-02   .5419899E-02   .4926954E-02   .4179176E-02   .3337208E-02
   .2499033E-02   .1775044E-02   .1045736E-02   .1390849E-03  -.7798434E-03
  -.1649255E-02  -.2391768E-02  -.3124800E-02  -.4084396E-02  -.5326420E-02
  -.6695216E-02  -.7788601E-02  -.8336228E-02  -.8463647E-02  -.8594866E-02
  -.8733481E-02  -.8955535E-02  -.9291950E-02  -.9627076E-02  -.1007874E-01
  -.1064396E-01  -.1137456E-01  -.1233564E-01  -.1323920E-01  -.1376497E-01
  -.1384305E-01  -.1339247E-01  -.1241872E-01  -.1110443E-01  -.9629887E-02
  -.7910699E-02  -.5952536E-02  -.3586874E-02  -.9648575E-03   .1831514E-02
   .4512079E-02   .6638253E-02   .7951252E-02   .8663053E-02   .8840952E-02
   .8547676E-02   .7677953E-02   .6451077E-02   .4971785E-02   .3323655E-02
   .1707472E-02   .2216661E-03  -.1165443E-02  -.2575178E-02  -.4269011E-02
  -.6182172E-02  -.7994559E-02  -.9497937E-02  -.1048719E-01  -.1090525E-01
  -.1093692E-01  -.1086326E-01  -.1085279E-01  -.1087055E-01  -.1059151E-01
  -.9802273E-02  -.8814894E-02  -.7832667E-02  -.6831240E-02  -.6001542E-02
  -.5542985E-02  -.5416440E-02  -.5358091E-02  -.4829005E-02  -.4069763E-02
  -.3377989E-02  -.2812884E-02  -.2184348E-02  -.1263147E-02  -.2794301E-04
   .1395541E-02   .2850231E-02   .4156498E-02   .4830969E-02   .4741844E-02
   .4086638E-02   .3270373E-02   .2451216E-02   .1510565E-02   .3810500E-03
  -.8630563E-03  -.1885635E-02  -.2373120E-02  -.2118957E-02  -.1173939E-02
   .1801588E-03   .1592609E-02   .2625752E-02   .3059861E-02   .2939189E-02
   .2090163E-02   .6371184E-03  -.9862216E-03  -.2447068E-02  -.3666043E-02
  -.4607716E-02  -.5393090E-02  -.6275850E-02  -.7172487E-02  -.7798625E-02
  -.8032113E-02  -.7767743E-02  -.6936392E-02  -.5682450E-02  -.4220055E-02
  -.2580002E-02  -.9572276E-03   .5453651E-03   .1863031E-02   .2749600E-02
   .3371988E-02   .4121047E-02   .4999498E-02   .5911026E-02   .6914520E-02
   .7840995E-02   .8381626E-02   .8283267E-02   .7522389E-02   .6477937E-02
   .5314859E-02   .4164469E-02   .3375277E-02   .3068052E-02   .3127690E-02
   .3526607E-02   .4303565E-02   .5181774E-02   .5771815E-02   .5965390E-02
   .5906571E-02   .5798344E-02   .5726281E-02   .5515784E-02   .5098926E-02
   .4644639E-02   .4110612E-02   .3293205E-02   .2133505E-02   .7152887E-03
  -.9475930E-03  -.2539702E-02  -.3578563E-02  -.4121339E-02  -.4269546E-02
  -.4042870E-02  -.3491035E-02  -.2583540E-02  -.1383892E-02  -.6984639E-04
   .1051301E-02   .1893297E-02   .2525164E-02   .2907020E-02   .3053568E-02
   .3049603E-02   .2814341E-02   .2334706E-02   .1684532E-02   .1025148E-02
   .6051783E-03   .4797201E-03   .5641236E-03   .9282621E-03   .1721189E-02
   .2902051E-02   .4257850E-02   .5400361E-02   .6017717E-02   .6145236E-02
   .5969737E-02   .5339080E-02   .4076455E-02   .2232171E-02  -.5895847E-04
  -.2354706E-02  -.4000113E-02  -.4508183E-02  -.3839107E-02  -.2339868E-02
  -.2210074E-03   .2184515E-02   .4447495E-02   .6463380E-02   .7997763E-02
   .8817086E-02   .8880042E-02   .8380769E-02   .7674843E-02   .6997632E-02
   .6597214E-02   .6501079E-02   .6564812E-02   .6654223E-02   .6871373E-02
   .7503179E-02   .8737219E-02   .1035592E-01   .1162806E-01   .1200169E-01
   .1135620E-01   .1002484E-01   .8317745E-02   .6432247E-02   .4666279E-02
   .3168542E-02   .2033727E-02   .1388989E-02   .1163102E-02   .1151701E-02
   .1170877E-02   .1122684E-02   .8474274E-03   .1429722E-03  -.8071199E-03
  -.1530395E-02  -.1789298E-02  -.1694559E-02  -.1487378E-02  -.1229468E-02
  -.1005713E-02  -.1063913E-02  -.1197914E-02  -.1150907E-02  -.1027186E-02
  -.6260020E-03   .1183733E-03   .9835225E-03   .1939002E-02   .2787281E-02
   .3088994E-02   .2787149E-02   .2067814E-02   .1411526E-02   .1116917E-02
   .1176408E-02   .1637251E-02   .2635557E-02   .3934593E-02   .5487849E-02
   .6983092E-02   .7944193E-02   .7996129E-02   .6827216E-02   .4612939E-02
   .2003467E-02  -.2560898E-03  -.1778675E-02  -.2589227E-02  -.3080044E-02
  -.3330246E-02  -.3203643E-02  -.2754566E-02  -.2074583E-02  -.1351001E-02
  -.6254076E-03   .5343968E-04   .7429618E-03   .1299198E-02   .1725269E-02
   .2093135E-02   .2152795E-02   .1947076E-02   .1582142E-02   .1042467E-02
   .4663864E-03  -.1365901E-03  -.6420239E-03  -.8418428E-03  -.4832567E-03
   .3875706E-03   .1276568E-02   .1772492E-02   .1769882E-02   .1274631E-02
   .5747265E-03  -.7035735E-04  -.3521673E-03  -.4674853E-03  -.6146881E-03
  -.7821419E-03  -.9080729E-03  -.8880107E-03  -.5618881E-03  -.8153778E-04
   .2827126E-03   .3213855E-03  -.1691470E-03  -.1192183E-02  -.2459044E-02
  -.3543509E-02  -.4430813E-02  -.5268413E-02  -.5946021E-02  -.6330110E-02
  -.6437137E-02  -.6236755E-02  -.5489106E-02  -.4424278E-02  -.3284223E-02
  -.2200366E-02  -.1515165E-02  -.1620420E-02  -.2444188E-02  -.3383743E-02
  -.4005179E-02  -.4342183E-02  -.4306350E-02  -.4099940E-02  -.4102877E-02
  -.4140160E-02  -.4056709E-02  -.3905322E-02  -.3683827E-02  -.3173240E-02
  -.2392925E-02  -.1813673E-02  -.1456169E-02  -.1219064E-02  -.1082710E-02
  -.1020919E-02  -.1003258E-02  -.1092029E-02  -.1542388E-02  -.2388296E-02
  -.3141466E-02  -.3167236E-02  -.2304216E-02  -.8844718E-03   .6670826E-03
   .2098528E-02   .3297413E-02   .4084995E-02   .4414550E-02   .4358639E-02
   .3858372E-02   .2985670E-02   .2068868E-02   .1175734E-02   .2707687E-03
  -.4513297E-03  -.8334387E-03  -.9328965E-03  -.9821549E-03  -.1309307E-02
  -.1796049E-02  -.1912640E-02  -.1570174E-02  -.1068020E-02  -.4900255E-03
   .8508826E-04   .7011537E-03   .1285916E-02   .1714315E-02   .2217217E-02
   .3029466E-02   .3912271E-02   .4552500E-02   .5112278E-02   .5830675E-02
   .6378501E-02   .6678541E-02   .6597539E-02   .5923553E-02   .4739886E-02
   .3355532E-02   .2222287E-02   .1460267E-02   .1239124E-02   .1476445E-02
   .1800492E-02   .1960191E-02   .1933794E-02   .1876171E-02   .2109395E-02
   .2600127E-02   .2993056E-02   .2841931E-02   .1971510E-02   .5606488E-03
  -.1278045E-02  -.3251479E-02  -.4966910E-02  -.6109605E-02  -.6870123E-02
  -.7615430E-02  -.8104543E-02  -.8117154E-02  -.7639509E-02  -.6965035E-02
  -.6390425E-02  -.5616161E-02  -.4669626E-02  -.3899870E-02  -.3235034E-02
  -.2417254E-02  -.1590129E-02  -.1060548E-02  -.8947245E-03  -.9436485E-03
  -.9824255E-03  -.7355801E-03  -.4122514E-03  -.1208333E-03   .3968880E-03
   .1089140E-02   .1638341E-02   .1883266E-02   .1887543E-02   .1801841E-02
   .1709632E-02   .1429636E-02   .7429551E-03  -.1383253E-03  -.7887880E-03
  -.1002180E-02  -.6754064E-03   .1793638E-03   .1165496E-02   .1809680E-02
   .1986805E-02   .1842416E-02   .1409222E-02   .6401640E-03  -.2714654E-03
  -.1330618E-02  -.2470027E-02  -.3315441E-02  -.3703272E-02  -.3742827E-02
  -.3619116E-02  -.3277267E-02  -.2568908E-02  -.1707940E-02  -.1051366E-02
  -.5263229E-03   .1769265E-03   .9989598E-03   .1622142E-02   .1898637E-02
   .1874564E-02   .1536774E-02   .9683484E-03   .3001260E-03  -.3580650E-03
  -.9615365E-03  -.1311940E-02  -.1241131E-02  -.9388920E-03  -.5253234E-03
  -.2606631E-03  -.3888283E-03  -.9179550E-03  -.1808318E-02  -.2807282E-02
  -.3514797E-02  -.3777337E-02  -.3700902E-02  -.3334999E-02  -.2597834E-02
  -.1663324E-02  -.7854278E-03   .1027603E-03   .9988474E-03   .1833907E-02
   .2761564E-02   .3766155E-02   .4853062E-02   .6139490E-02   .7704886E-02
   .9726506E-02   .1163581E-01   .1279380E-01   .1310787E-01   .1276634E-01
   .1193059E-01   .1097416E-01   .1035886E-01   .1017946E-01   .1009411E-01
   .9749357E-02   .9114929E-02   .8319300E-02   .7704280E-02   .7441149E-02
   .7442713E-02   .7408998E-02   .7044188E-02   .6397901E-02   .5598610E-02
   .4940200E-02   .4370402E-02   .3512053E-02   .2472466E-02   .1330049E-02
   .1005902E-03  -.1194112E-02  -.2401844E-02  -.3215784E-02  -.3554169E-02
  -.3688994E-02  -.3893975E-02  -.4064545E-02  -.4226930E-02  -.4269575E-02
  -.4283148E-02  -.4109874E-02  -.3819708E-02  -.3573626E-02  -.3285300E-02
  -.2556064E-02  -.1512575E-02  -.4548137E-03   .3891242E-03   .1086657E-02
   .1617868E-02   .1915296E-02   .2016345E-02   .2029931E-02   .2128040E-02
   .2609319E-02   .3509094E-02   .4481441E-02   .5422702E-02   .6362068E-02
   .7093979E-02   .7371229E-02   .6980002E-02   .5882511E-02   .4146128E-02
   .2196066E-02   .5549765E-03  -.4001431E-03  -.6669476E-03  -.3879534E-03
   .5638623E-03   .2011193E-02   .3488854E-02   .4515876E-02   .4966211E-02
   .5206503E-02   .5260166E-02   .5060803E-02   .4516659E-02   .3549934E-02
   .2250068E-02   .8664875E-03  -.1870253E-03  -.7315958E-03  -.1152534E-02
  -.1916189E-02  -.3129948E-02  -.4551017E-02  -.5685678E-02  -.6227540E-02
  -.6274080E-02  -.6121915E-02  -.5984793E-02  -.5769218E-02  -.5641125E-02
  -.5462152E-02  -.4905902E-02  -.4153303E-02  -.3585399E-02  -.3313775E-02
  -.3082725E-02  -.2993852E-02  -.3085700E-02  -.2930314E-02  -.2239264E-02
  -.1339087E-02  -.7056297E-03  -.4962042E-03  -.5739869E-03  -.7156759E-03
  -.7798303E-03  -.7460107E-03  -.6696355E-03  -.6120651E-03  -.5975000E-03
  -.6120931E-03  -.5904983E-03  -.3613625E-03  -.1829423E-03  -.2601051E-03
  -.4680518E-03  -.6395552E-03  -.7005622E-03  -.6715667E-03  -.5690771E-03
  -.2404847E-03   .2799908E-03   .9162611E-03   .1327224E-02   .1453878E-02
   .1400314E-02   .1360390E-02   .1551139E-02   .1850986E-02   .2079229E-02
   .2162507E-02   .2137797E-02   .2082253E-02   .2050757E-02   .2056238E-02
   .2078952E-02   .2060476E-02   .1778549E-02   .1055865E-02   .1575129E-03
  -.4845024E-03  -.7138057E-03  -.6541267E-03  -.4865092E-03  -.1506741E-03
   .5245125E-03   .1383405E-02   .2200062E-02   .2660344E-02   .2592538E-02
   .2235581E-02   .1690622E-02   .8859365E-03  -.4037645E-04  -.1114437E-02
  -.2259306E-02  -.3113341E-02  -.3735754E-02  -.4433152E-02  -.5037873E-02
  -.5430302E-02  -.5747773E-02  -.5945086E-02  -.5781016E-02  -.5084406E-02
  -.4152394E-02  -.3435979E-02  -.2933511E-02  -.2475870E-02  -.1951663E-02
  -.1524552E-02  -.1257335E-02  -.1023849E-02  -.1038736E-02  -.1374133E-02
  -.1763800E-02  -.1953127E-02  -.1692712E-02  -.8491495E-03   .3995241E-03
   .1572188E-02   .2277509E-02   .2709811E-02   .3317048E-02   .4111471E-02
   .4770537E-02   .5138337E-02   .5442436E-02   .5882467E-02   .6499179E-02
   .7186949E-02   .7684124E-02   .7899712E-02   .7891511E-02   .7551025E-02
   .6728130E-02   .5500920E-02   .4087558E-02   .2745344E-02   .1930980E-02
   .1847280E-02   .2150057E-02   .2430341E-02   .2498903E-02   .2365442E-02
   .1962186E-02   .1226456E-02   .5576835E-03   .1694352E-03  -.8429259E-04
  -.2396271E-03  -.3562095E-03  -.6862262E-03  -.1482046E-02  -.2699473E-02
  -.4086090E-02  -.5243112E-02  -.5817500E-02  -.5626581E-02  -.4686551E-02
  -.3086350E-02  -.1387306E-02  -.2527926E-04   .1019329E-02   .1732339E-02
   .2093141E-02   .2208464E-02   .2226317E-02   .2247925E-02   .2316015E-02
   .2457269E-02   .2886169E-02   .3733956E-02   .4749692E-02   .5958288E-02
   .7186208E-02   .8290301E-02   .9290713E-02   .9779668E-02   .9435276E-02
   .8599585E-02   .7602020E-02   .6464650E-02   .5030216E-02   .3581965E-02
   .2342094E-02   .1236087E-02   .2830714E-03  -.7897125E-03  -.1901795E-02
  -.2674187E-02  -.2981916E-02  -.2970394E-02  -.2865229E-02  -.2813011E-02
  -.2838187E-02  -.2845256E-02  -.2527010E-02  -.1733166E-02  -.8089330E-03
  -.1869763E-03   .9666997E-05  -.7382548E-04  -.2752513E-03  -.6188898E-03
  -.7741266E-03  -.5802173E-03  -.2571224E-03   .1169059E-04   .3267655E-03
   .5120469E-03   .6601072E-03   .9005578E-03   .1139721E-02   .1286966E-02
   .1335722E-02   .1375899E-02   .1672091E-02   .2222193E-02   .2907072E-02
   .3291121E-02   .3195927E-02   .2880930E-02   .2585036E-02   .2205927E-02
   .1766933E-02   .1413221E-02   .9862579E-03   .5281617E-03   .4118473E-03
   .5076065E-03   .7621656E-03   .1161550E-02   .1676206E-02   .2001975E-02
   .2135429E-02   .2019747E-02   .1661029E-02   .1064669E-02   .4224730E-03
   .6154838E-05  -.1737619E-03  -.4872757E-03  -.1208580E-02  -.2067321E-02
  -.2660983E-02  -.2863040E-02  -.2799677E-02  -.2627653E-02  -.2305700E-02
  -.2092311E-02  -.1955552E-02  -.1767147E-02  -.1583263E-02  -.1469470E-02
  -.1449295E-02  -.1487668E-02  -.1529272E-02  -.1549149E-02  -.1591118E-02
  -.1864021E-02  -.2276450E-02  -.2418915E-02  -.2466194E-02  -.2863166E-02
  -.3515825E-02  -.4059239E-02  -.4320099E-02  -.4345407E-02  -.4238517E-02
  -.3930575E-02  -.3448631E-02  -.3006787E-02  -.2565880E-02  -.2056521E-02
  -.1438538E-02  -.7707676E-03  -.2971110E-03  -.1075637E-03  -.1185456E-03
  -.2170934E-03  -.4484850E-03  -.6349876E-03  -.5408685E-03  -.3009883E-03
  -.1049032E-03  -.2322753E-04  -.3322508E-04  -.3691582E-04   .2245217E-03
   .9266934E-03   .1620091E-02   .1828985E-02   .1641704E-02   .1360843E-02
   .1183515E-02   .1190457E-02   .1469940E-02   .1818227E-02   .2092679E-02
   .2372977E-02   .2595807E-02   .2710196E-02   .2732729E-02   .2677418E-02
   .2358569E-02   .1592875E-02   .6127015E-03  -.3513956E-03  -.1333647E-02
  -.2247035E-02  -.3081350E-02  -.4011447E-02  -.4995630E-02  -.6117530E-02
  -.7319949E-02  -.8193953E-02  -.8529741E-02  -.8281392E-02  -.7685728E-02
  -.7179577E-02  -.6983456E-02  -.7035948E-02  -.7144107E-02  -.7024250E-02
  -.6550568E-02  -.6015004E-02  -.5705299E-02  -.5804303E-02  -.6146463E-02
  -.6265213E-02  -.6126524E-02  -.5908802E-02  -.5761947E-02  -.5730254E-02
  -.5769969E-02  -.5786464E-02  -.5572608E-02  -.4867233E-02  -.3539684E-02
  -.1871030E-02  -.5750480E-03   .1540623E-03   .6073408E-03   .1068236E-02
   .1708172E-02   .2472533E-02   .3266699E-02   .3850253E-02   .4249199E-02
   .4504088E-02   .4440481E-02   .4201396E-02   .3985228E-02   .3751726E-02
   .3506199E-02   .3369805E-02   .3138585E-02   .2674945E-02   .1854365E-02
   .8653389E-03   .1310332E-03  -.1842294E-03  -.3308856E-03  -.6427822E-03
  -.1045286E-02  -.1227438E-02  -.9505268E-03  -.4646475E-03  -.1065842E-03
   .9907173E-05  -.5711507E-04  -.1721795E-03  -.2258894E-03  -.1885154E-03
  -.1196195E-03  -.2092351E-03  -.7532736E-03  -.1695062E-02  -.2684629E-02
  -.3569532E-02  -.4264319E-02  -.4862464E-02  -.5307476E-02  -.5545309E-02
  -.5617547E-02  -.5603197E-02  -.5462459E-02  -.5083041E-02  -.4649347E-02
  -.4371438E-02  -.4288956E-02  -.4327633E-02  -.4516447E-02  -.4937245E-02
  -.5383022E-02  -.5648201E-02  -.5703442E-02  -.5644928E-02  -.5580038E-02
  -.5560263E-02  -.5464916E-02  -.4995237E-02  -.4148586E-02  -.3235183E-02
  -.2312589E-02  -.1448598E-02  -.9543848E-03  -.5605888E-03   .3360291E-04
   .7710523E-03   .1598784E-02   .2288160E-02   .2556968E-02   .2236081E-02
   .1568774E-02   .8754997E-03   .6933727E-03   .1246959E-02   .2097007E-02
   .2697834E-02   .2851503E-02   .2708294E-02   .2522631E-02   .2447974E-02
   .2487624E-02   .2476850E-02   .2080806E-02   .1243435E-02   .3785464E-03
  -.1306616E-03  -.2343544E-03  -.1200620E-03  -.7081523E-04  -.2962298E-03
  -.4804892E-03  -.5167303E-03  -.6189285E-03  -.6145644E-03  -.4424232E-03
  -.2489192E-03  -.2106849E-03  -.4728555E-03  -.6649649E-03  -.5371839E-03
  -.1958408E-03   .3874327E-03   .1267757E-02   .2200684E-02   .3102359E-02
   .4058153E-02   .4882765E-02   .5350523E-02   .5427929E-02   .5067674E-02
   .4458506E-02   .3748110E-02   .3139408E-02   .2872322E-02   .3135111E-02
   .3735566E-02   .4472263E-02   .5101191E-02   .5372375E-02   .5099794E-02
   .4472800E-02   .3706195E-02   .3066222E-02   .2708122E-02   .2373639E-02
   .2003588E-02   .1953050E-02   .2256532E-02   .2669291E-02   .3229724E-02
   .4029765E-02   .4855562E-02   .5396931E-02   .5565985E-02   .5464778E-02
   .5071325E-02   .4302407E-02   .3413719E-02   .2793951E-02   .2535286E-02
   .2339118E-02   .2027648E-02   .1874808E-02   .1896929E-02   .2035513E-02
   .2328651E-02   .2612704E-02   .2750184E-02   .2737891E-02   .2664851E-02
   .2612385E-02   .2605840E-02   .2631170E-02   .2664483E-02   .2690784E-02
   .2712626E-02   .2766111E-02   .3037710E-02   .3574108E-02   .4298981E-02
   .5037695E-02   .5520127E-02   .5675395E-02   .5619321E-02   .5496277E-02
   .5254606E-02   .4795029E-02   .4176751E-02   .3441353E-02   .2524370E-02
   .1227898E-02   .3166687E-04  -.4426983E-03  -.2959477E-03   .4266785E-04
   .2477957E-03   .2392340E-03   .1116817E-03   .1220006E-04   .1763399E-03
   .8397734E-03   .1828717E-02   .2817455E-02   .3804370E-02   .4725057E-02
   .5346421E-02   .5598018E-02   .5583757E-02   .5339583E-02   .4874685E-02
   .4330872E-02   .3731599E-02   .3356697E-02   .3371260E-02   .3606671E-02
   .4211933E-02   .4892367E-02   .5210629E-02   .4941982E-02   .4295511E-02
   .3510801E-02   .2814021E-02   .2199315E-02   .1659197E-02   .1074700E-02
   .4221288E-03  -.3330036E-03  -.9619031E-03  -.1188577E-02  -.8783607E-03
  -.4643914E-03  -.5253395E-03  -.1103882E-02  -.1981894E-02  -.2742956E-02
  -.3096251E-02  -.3063534E-02  -.2844965E-02  -.2616482E-02  -.2376964E-02
  -.1867943E-02  -.1020835E-02  -.2144835E-03   .1994614E-03   .1963805E-03
  -.1055865E-03  -.7553383E-03  -.1711801E-02  -.2601722E-02  -.3115471E-02
  -.3232998E-02  -.3117671E-02  -.2881361E-02  -.2351075E-02  -.1389764E-02
  -.3499274E-03   .3294861E-03   .5325243E-03   .4102828E-03   .2253136E-03
   .2925917E-03   .4079667E-03   .3902065E-03   .4800627E-03   .5573296E-03
   .4786889E-03   .3247797E-03   .1451817E-03  -.2189538E-03  -.7535548E-03
  -.1232137E-02  -.1665707E-02  -.2082897E-02  -.2350183E-02  -.2428070E-02
  -.2402497E-02  -.2388395E-02  -.2451141E-02  -.2591343E-02  -.2780978E-02
  -.2968281E-02  -.3094216E-02  -.3128624E-02  -.3069706E-02  -.2906283E-02
  -.2484475E-02  -.1822111E-02  -.1218087E-02  -.9173360E-03  -.1101151E-02
  -.1700618E-02  -.2297849E-02  -.2310092E-02  -.1525310E-02  -.6999654E-03
  -.5083254E-03  -.9777685E-03  -.1792031E-02  -.2430081E-02  -.2651250E-02
  -.2563374E-02  -.2409757E-02  -.2375045E-02  -.2613968E-02  -.3017184E-02
  -.3329844E-02  -.3686445E-02  -.4207874E-02  -.4905017E-02  -.5483145E-02
  -.5733819E-02  -.5696944E-02  -.5506434E-02  -.5020271E-02  -.4105866E-02
  -.3212507E-02  -.2705029E-02  -.2602146E-02  -.2700970E-02  -.2785638E-02
  -.2754475E-02  -.2628005E-02  -.2493545E-02  -.2422008E-02  -.2439840E-02
  -.2520589E-02  -.2610208E-02  -.2655157E-02  -.2635387E-02  -.2576183E-02
  -.2524416E-02  -.2509196E-02  -.2522958E-02  -.2440138E-02  -.2206538E-02
  -.2159466E-02  -.2314870E-02  -.2365209E-02  -.2027844E-02  -.1509175E-02
  -.1130804E-02  -.1008064E-02  -.9523176E-03  -.6732875E-03  -.2809540E-03
   .5828954E-05   .1120663E-03   .9233188E-04  -.6995545E-04  -.4757773E-03
  -.1037179E-02  -.1695956E-02  -.2226895E-02  -.2503905E-02  -.2692027E-02
  -.3065380E-02  -.3514048E-02  -.3817248E-02  -.3791851E-02  -.3360958E-02
  -.2837006E-02  -.2525537E-02  -.2477929E-02  -.2566202E-02  -.2643305E-02
  -.2648395E-02  -.2602466E-02  -.2553313E-02  -.2526763E-02  -.2527468E-02
  -.2545624E-02  -.2570476E-02  -.2583450E-02  -.2454824E-02  -.2020647E-02
  -.1372638E-02  -.6159292E-03  -.1270987E-04   .3048113E-03   .5215922E-03
   .1039120E-02   .1916631E-02   .2739285E-02   .3185563E-02   .3357253E-02
   .3485333E-02   .3396046E-02   .3123832E-02   .2723800E-02   .2066916E-02
   .1236959E-02   .6935867E-03   .6739938E-03   .8786520E-03   .1207970E-02
   .1470648E-02   .1410594E-02   .8911030E-03   .1217462E-03  -.7017879E-03
  -.1413608E-02  -.2022372E-02  -.2409606E-02  -.2641004E-02  -.3099754E-02
  -.3890428E-02  -.4654285E-02  -.5099105E-02  -.5220749E-02  -.5180856E-02
  -.5027730E-02  -.4665917E-02  -.4152404E-02  -.3516266E-02  -.2862964E-02
  -.2074322E-02  -.1272816E-02  -.9262487E-03  -.1024772E-02  -.1149373E-02
  -.8907366E-03  -.2560833E-03   .6122462E-03   .1366743E-02   .1896573E-02
   .2384714E-02   .2792165E-02   .3025583E-02   .3084444E-02   .3037514E-02
   .2955561E-02   .2875194E-02   .2707989E-02   .2412558E-02   .2214914E-02
   .1999018E-02   .1888544E-02   .2028601E-02   .2218832E-02   .2531896E-02
   .2881269E-02   .3112652E-02   .3072248E-02   .2759376E-02   .2483613E-02
   .2184679E-02   .1900758E-02   .1728373E-02   .1791043E-02   .2183106E-02
   .2640923E-02   .2897523E-02   .2909796E-02   .2794428E-02   .2689577E-02
   .2679856E-02   .2869580E-02   .3252597E-02   .3448493E-02   .3414211E-02
   .3310244E-02   .3251903E-02   .3274141E-02   .3346300E-02   .3403882E-02
   .3286823E-02   .2815802E-02   .2096513E-02   .1266387E-02   .6061124E-03
   .1525952E-03  -.3265683E-03  -.9089252E-03  -.1615777E-02  -.2202988E-02
  -.2484180E-02  -.2494284E-02  -.2394007E-02  -.2320919E-02  -.2312643E-02
  -.2213143E-02  -.1843843E-02  -.1416159E-02  -.1162058E-02  -.1126039E-02
  -.1207656E-02  -.1278003E-02  -.1272594E-02  -.1222269E-02  -.1334153E-02
  -.1749562E-02  -.2210019E-02  -.2308445E-02  -.1749655E-02  -.7748900E-03
   .4191604E-04   .3999639E-03   .3803000E-03   .2323706E-03   .1707799E-03
   .3738071E-03   .7396017E-03   .8761799E-03   .7860080E-03   .7811663E-03
   .1082304E-02   .1483230E-02   .1726607E-02   .1602240E-02   .1094034E-02
   .5405287E-03   .1946767E-03  -.3631018E-04  -.1877574E-03   .8602375E-04
   .6264764E-03   .8949292E-03   .8252210E-03   .6066167E-03   .2761732E-03
  -.2044787E-03  -.6375199E-03  -.8842981E-03  -.9652526E-03  -.9812861E-03
  -.9996132E-03  -.9190642E-03  -.7079194E-03  -.5156648E-03  -.2249135E-03
   .7523102E-04   .2664345E-03   .3259793E-03   .3075945E-03   .2747247E-03
   .2601252E-03   .2627751E-03   .2744751E-03   .2994115E-03   .3447416E-03
   .4091654E-03   .4805004E-03   .5527498E-03   .7233016E-03   .1022085E-02
   .1092105E-02   .8776991E-03   .4376524E-03  -.2268989E-03  -.9653882E-03
  -.1698651E-02  -.2217004E-02  -.2435060E-02  -.2421707E-02  -.2189166E-02
  -.1685372E-02  -.1154513E-02  -.8310305E-03  -.7486614E-03  -.8027998E-03
  -.8782709E-03  -.9256559E-03  -.9596284E-03  -.1010274E-02  -.1078827E-02
  -.1027552E-02  -.6780823E-03  -.2192259E-03   .1073520E-03   .2418857E-03
   .2732686E-03   .3100804E-03   .3937831E-03   .4988152E-03   .5830282E-03
   .6129469E-03   .4792080E-03   .1521916E-03  -.1099281E-03  -.4111616E-03
  -.8450289E-03  -.1465627E-02  -.2038821E-02  -.2491357E-02  -.2970950E-02
  -.3305040E-02  -.3218866E-02  -.2880843E-02  -.2583616E-02  -.2481295E-02
  -.2541915E-02  -.2515254E-02  -.2148404E-02  -.1741166E-02  -.1737825E-02
  -.2065889E-02  -.2540533E-02  -.3125094E-02  -.3607411E-02  -.3827374E-02
  -.3703429E-02  -.3232203E-02  -.2709825E-02  -.2301043E-02  -.1859970E-02
  -.1447968E-02  -.1180123E-02  -.1059187E-02  -.1123211E-02  -.1472614E-02
  -.1916585E-02  -.2209996E-02  -.2282143E-02  -.2103353E-02  -.1646775E-02
  -.1277073E-02  -.1408695E-02  -.1874558E-02  -.2289323E-02  -.2447806E-02
  -.2381505E-02  -.2236039E-02  -.2133489E-02  -.2111700E-02  -.2144144E-02
  -.2187835E-02  -.2212521E-02  -.2136577E-02  -.1790730E-02  -.1320283E-02
  -.9866844E-03  -.8794316E-03  -.9132733E-03  -.8480351E-03  -.4634110E-03
  -.7829473E-04  -.1463560E-03  -.5530701E-03  -.9569467E-03  -.1147055E-02
  -.1115258E-02  -.9973850E-03  -.1022173E-02  -.1397876E-02  -.1936899E-02
  -.2340332E-02  -.2558468E-02  -.2755582E-02  -.2784162E-02  -.2702141E-02
  -.2840477E-02  -.3180295E-02  -.3483343E-02  -.3609095E-02  -.3575063E-02
  -.3479457E-02  -.3410112E-02  -.3392448E-02  -.3311850E-02  -.2984108E-02
  -.2535396E-02  -.2196973E-02  -.2051302E-02  -.2033213E-02  -.2058214E-02
  -.1993572E-02  -.1631865E-02  -.1141836E-02  -.8027819E-03  -.6989981E-03
  -.7615243E-03  -.8559004E-03  -.8865644E-03  -.8401861E-03  -.7622492E-03
  -.7069514E-03  -.6997747E-03  -.7274493E-03  -.6741930E-03  -.3435715E-03
   .9291660E-04   .3805571E-03   .4428301E-03   .3576409E-03   .1467533E-03
  -.1434734E-03  -.1589963E-03  -.2232995E-04  -.1219799E-03  -.4283199E-03
  -.6339336E-03  -.3990077E-03   .2143379E-03   .1028614E-02   .1795364E-02
   .2462870E-02   .2917270E-02   .3128159E-02   .3188148E-02   .3113920E-02
   .2823802E-02   .2491676E-02   .2299527E-02   .2269579E-02   .2321207E-02
   .2361668E-02   .2330032E-02   .2137773E-02   .1650456E-02   .9614189E-03
   .1743651E-03  -.5505928E-03  -.1219908E-02  -.1620886E-02  -.1505060E-02
  -.1110957E-02  -.7937149E-03  -.7931002E-03  -.1188708E-02  -.1578118E-02
  -.1487810E-02  -.1055393E-02  -.6498435E-03  -.4778761E-03  -.5221867E-03
  -.6470030E-03  -.7302722E-03  -.7259999E-03  -.6515022E-03  -.5451787E-03
  -.4484675E-03  -.4757534E-03  -.7890565E-03  -.1087097E-02  -.9567618E-03
  -.3912700E-03   .4132114E-03   .1058978E-02   .1311949E-02   .1218460E-02
   .1001169E-02   .8404805E-03   .7929617E-03   .8225221E-03   .8593734E-03
   .8632326E-03   .8555720E-03   .8586292E-03   .8837783E-03   .8210456E-03
   .5146689E-03   .1062050E-03  -.1666691E-03  -.2227426E-03  -.1377336E-03
  -.1332061E-03  -.4861241E-03  -.1061056E-02  -.1453601E-02  -.1430869E-02
  -.1241002E-02  -.8998459E-03  -.4358583E-03   .7112241E-04   .3521766E-03
   .4657788E-03   .3274010E-03   .8785938E-04  -.6407984E-04   .2755186E-04
   .4676490E-03   .9671442E-03   .1261917E-02   .1437919E-02   .1773839E-02
   .2184796E-02   .2475899E-02   .2579719E-02   .2548496E-02   .2360891E-02
   .1922559E-02   .1441646E-02   .1128294E-02   .1013442E-02   .1025625E-02
   .1076816E-02   .1116547E-02   .1130662E-02   .1014680E-02   .6205308E-03
   .5986528E-04  -.5950132E-03  -.1011594E-02  -.8805304E-03  -.4331544E-03
  -.8597008E-04  -.1893369E-04  -.1616132E-03  -.3497042E-03  -.4616276E-03
  -.4706251E-03  -.4166884E-03  -.3645501E-03  -.3633158E-03  -.4040660E-03
  -.4490693E-03  -.4756141E-03  -.4913194E-03  -.5180707E-03  -.5644837E-03
  -.6202414E-03  -.6679911E-03  -.6970756E-03  -.7077743E-03  -.7095416E-03
  -.6892168E-03  -.6607260E-03  -.7133242E-03  -.1028426E-02  -.1460890E-02
  -.1676444E-02  -.1415416E-02  -.8836582E-03  -.4500988E-03  -.2845841E-03
  -.3325890E-03  -.4477570E-03  -.4706198E-03  -.1587488E-03   .3593142E-03
   .7667350E-03   .9347043E-03   .9120116E-03   .8293620E-03   .8016990E-03
   .8979484E-03   .1247538E-02   .1518190E-02   .1516861E-02   .1615577E-02
   .1943573E-02   .2292969E-02   .2492740E-02   .2565025E-02   .2799635E-02
   .3215696E-02   .3574157E-02   .3699406E-02   .3461007E-02   .3197064E-02
   .2991590E-02   .2741731E-02   .2518102E-02   .2366831E-02   .2092548E-02
   .1614398E-02   .1150655E-02   .8779210E-03   .8109955E-03   .8666090E-03
   .9101437E-03   .6877904E-03   .1807325E-03  -.3101089E-03  -.5968788E-03
  -.8521755E-03  -.1207853E-02  -.1514235E-02  -.1653646E-02  -.1668555E-02
  -.1830843E-02  -.2256648E-02  -.2709053E-02  -.2977850E-02  -.3166264E-02
  -.3317650E-02  -.3204771E-02  -.2918789E-02  -.2648612E-02  -.2488687E-02
  -.2425242E-02  -.2401211E-02  -.2353496E-02  -.2134405E-02  -.1681767E-02
  -.1249302E-02  -.1052958E-02  -.1092068E-02  -.1235040E-02  -.1360440E-02
  -.1396256E-02  -.1179608E-02  -.4937159E-03   .4784236E-03   .1239644E-02
   .1413859E-02   .9733263E-03   .3691204E-03   .7003040E-05  -.4122086E-04
   .6671818E-04   .1600264E-03   .1813838E-03   .1753753E-03   .2020551E-03
   .3948381E-03   .7692665E-03   .9360323E-03   .8262596E-03   .6382653E-03
   .5337056E-03   .5521585E-03   .7681151E-03   .1276371E-02   .1824558E-02
   .2149625E-02   .2106785E-02   .1672790E-02   .1167621E-02   .8797025E-03
   .8499068E-03   .8472217E-03   .6010263E-03   .3335410E-03   .2963023E-03
   .3281405E-03   .4191337E-03   .3304137E-03   .3229983E-04  -.2818180E-03
  -.4780998E-03  -.6202512E-03  -.9428208E-03  -.1364281E-02  -.1667111E-02
  -.1774987E-02  -.1656963E-02  -.1216817E-02  -.6768699E-03  -.3428466E-03
  -.3571307E-03  -.7943221E-03  -.1361149E-02  -.1714566E-02  -.1768623E-02
  -.1657962E-02  -.1645817E-02  -.1998820E-02  -.2564651E-02  -.3022573E-02
  -.3155410E-02  -.2834390E-02  -.2319292E-02  -.1890643E-02  -.1483357E-02
  -.1204405E-02  -.1234596E-02  -.1265284E-02  -.1149326E-02  -.1151604E-02
  -.1172863E-02  -.1262392E-02  -.1454421E-02  -.1399063E-02  -.1000440E-02
  -.3214762E-03   .3523117E-03   .7227660E-03   .7616824E-03   .6279823E-03
   .4990942E-03   .4617094E-03   .5085244E-03   .5879914E-03   .6616133E-03
   .7240556E-03   .7785383E-03   .8198730E-03   .8659588E-03   .9180356E-03
   .9482027E-03   .9327031E-03   .8742712E-03   .8000541E-03   .7396415E-03
   .7015394E-03   .6690759E-03   .5661197E-03   .1780821E-03  -.4381180E-03
  -.1161935E-02  -.1793045E-02  -.1935033E-02  -.1548903E-02  -.1030184E-02
  -.7070616E-03  -.6456161E-03  -.7171113E-03  -.7765275E-03  -.7690600E-03
  -.7138361E-03  -.6529739E-03  -.6118340E-03  -.5941835E-03  -.6004599E-03
  -.6419280E-03  -.7096320E-03  -.7720498E-03  -.8073449E-03  -.8453984E-03
  -.1077783E-02  -.1529448E-02  -.1911580E-02  -.1866904E-02  -.1364943E-02
  -.6347958E-03  -.1136350E-03  -.9852437E-04  -.3502432E-03  -.3683314E-03
   .2088500E-04   .5317896E-03   .8813791E-03   .1019089E-02   .1205735E-02
   .1573844E-02   .1935135E-02   .2126593E-02   .2138227E-02   .2067388E-02
   .1997959E-02   .1972580E-02   .2003159E-02   .2060546E-02   .2124336E-02
   .2180107E-02   .2212522E-02   .2218494E-02   .2209496E-02   .2196462E-02
   .2157825E-02   .1921041E-02   .1485587E-02   .1104304E-02   .9415370E-03
   .9576804E-03   .8529131E-03   .5019258E-03   .1315807E-03  -.6947748E-04
  -.9722655E-04  -.4792095E-04  -.1443703E-04  -.3273198E-04  -.6916961E-04
  -.7443785E-04  -.3638488E-04   .3040712E-04   .1015738E-03   .1596164E-03
   .1947408E-03   .2057195E-03   .2252287E-03   .4364814E-03   .8577540E-03
   .1231282E-02   .1386733E-02   .1349518E-02   .1241846E-02   .1169184E-02
   .1174330E-02   .1282936E-02   .1633485E-02   .2170175E-02   .2599468E-02
   .2780596E-02   .2753084E-02   .2638911E-02   .2551325E-02   .2530528E-02
   .2522597E-02   .2308513E-02   .1849216E-02   .1406537E-02   .1173932E-02
   .1186715E-02   .1514935E-02   .2062179E-02   .2489509E-02   .2425007E-02
   .1720231E-02   .7584993E-03   .8663702E-04  -.7201172E-04   .2754990E-03
   .6935448E-03   .7260259E-03   .4302074E-03   .6528768E-04  -.1795479E-03
  -.2730326E-03  -.4159145E-03  -.7796251E-03  -.1157650E-02  -.1352755E-02
  -.1354336E-02  -.1239094E-02  -.1095516E-02  -.9833860E-03  -.9092973E-03
  -.7297976E-03  -.3116851E-03   .1325175E-03   .4041399E-03   .6344644E-03
   .1165060E-02   .1959053E-02   .2603310E-02   .2718903E-02   .2298079E-02
   .1939259E-02   .2095767E-02   .2574001E-02   .2994210E-02   .3021699E-02
   .2588385E-02   .2055403E-02   .1742608E-02   .1693626E-02   .1618369E-02
   .1263513E-02   .8129266E-03   .4980019E-03   .3855358E-03   .4231687E-03
   .5000492E-03   .5402583E-03   .5328566E-03   .5069022E-03   .4934155E-03
   .5072339E-03   .5548193E-03   .6218747E-03   .6970811E-03   .9000516E-03
   .1160269E-02   .1159159E-02   .9523280E-03   .7241519E-03   .5864098E-03
   .5414741E-03   .4105097E-03   .1507329E-03  -.9094369E-04  -.4048446E-03
  -.5718970E-03  -.4688723E-03  -.4140082E-03  -.3666752E-03  -.2208944E-03
  -.1029442E-03   .1576985E-03   .4906506E-03   .7483830E-03   .9922746E-03
   .1416177E-02   .1886949E-02   .2214601E-02   .2460273E-02   .2845891E-02
   .3280647E-02   .3704750E-02   .4217931E-02   .4669915E-02   .4904327E-02
   .4937055E-02   .4883469E-02   .4841355E-02   .4820650E-02   .4807546E-02
   .4781732E-02   .4624522E-02   .4196567E-02   .3710007E-02   .3387884E-02
   .3285711E-02   .3328006E-02   .3396917E-02   .3306780E-02   .2779614E-02
   .1871981E-02   .1056654E-02   .6304630E-03   .5665122E-03   .6748804E-03
   .7776646E-03   .7887695E-03   .7443831E-03   .6936900E-03   .6636246E-03
   .6769167E-03   .7257955E-03   .7923368E-03   .8345200E-03   .8303987E-03
   .7999138E-03   .6511858E-03   .3410148E-03   .1069628E-03  -.1561624E-03
  -.4207944E-03  -.5832723E-03  -.6069522E-03  -.4282435E-03   .3266658E-04
   .5416311E-03   .7308570E-03   .3951853E-03  -.5284196E-04  -.8338769E-04
   .2734543E-03   .8047355E-03   .1425144E-02   .1926987E-02   .2181249E-02
   .2205721E-02   .2017773E-02   .1586406E-02   .1134970E-02   .8653919E-03
   .7987246E-03   .8399779E-03   .8878050E-03   .9019474E-03   .9951010E-03
   .1337634E-02   .1765114E-02   .2062114E-02   .2170372E-02   .2164968E-02
   .2147206E-02   .2159726E-02   .2088423E-02   .1764958E-02   .1356563E-02
   .1086979E-02   .1019673E-02   .1080351E-02   .1162768E-02   .1205035E-02
   .1193398E-02   .1142801E-02   .1093821E-02   .1074515E-02   .1084264E-02
   .1106311E-02   .1124336E-02   .1137524E-02   .1145997E-02   .1022915E-02
   .6067793E-03   .1028227E-03  -.2359665E-03  -.3443087E-03  -.3118844E-03
  -.2612929E-03  -.2701969E-03  -.3450853E-03  -.4323320E-03  -.4964903E-03
  -.5242904E-03  -.5490282E-03  -.5997223E-03  -.7876713E-03  -.1238647E-02
  -.1733270E-02  -.2158738E-02  -.2632729E-02  -.3051186E-02  -.3285543E-02
  -.3336334E-02  -.3296679E-02  -.3263550E-02  -.3281143E-02  -.3341947E-02
  -.3412723E-02  -.3463818E-02  -.3489674E-02  -.3597798E-02  -.3829913E-02
  -.3838702E-02  -.3483434E-02  -.2795943E-02  -.2139177E-02  -.1769631E-02
  -.1579696E-02  -.1267531E-02  -.8739551E-03  -.5644455E-03  -.4073441E-03
  -.3655147E-03  -.3650865E-03  -.3530474E-03  -.3146813E-03  -.2639630E-03
  -.2164405E-03  -.1734508E-03  -.1273319E-03  -.7446882E-04  -.1213340E-04
   .1541972E-03   .4351437E-03   .4682235E-03   .2581518E-03   .1144349E-03
   .2131406E-03   .2142429E-03  -.8787898E-04  -.7178689E-03  -.1343672E-02
  -.1570721E-02  -.1233159E-02  -.6805285E-03  -.2816306E-03  -.6155272E-04
   .2265509E-03   .5327245E-03   .6030190E-03   .2570897E-03  -.2589225E-03
  -.6237784E-03  -.7390238E-03  -.6715790E-03  -.5624655E-03  -.5090682E-03
  -.5126749E-03  -.5521174E-03  -.5927023E-03  -.6154482E-03  -.6546477E-03
  -.7659895E-03  -.9026771E-03  -.9939564E-03  -.9115801E-03  -.5148971E-03
  -.3887806E-04   .1492311E-03  -.5028745E-04  -.2000382E-03  -.2453807E-03
  -.3472351E-03  -.3835640E-03  -.4047882E-03  -.3465790E-03  -.4393591E-03
  -.6728391E-03  -.8872833E-03  -.8896389E-03  -.6454340E-03  -.4504927E-03
  -.2408781E-03  -.2800385E-04   .1018006E-03   .1384948E-03   .1344349E-03
   .1423475E-03   .1917829E-03   .2721142E-03   .2355815E-03   .4112464E-05
  -.8343661E-04   .5243450E-04   .2660195E-03   .3995725E-03   .4243032E-03
   .3932265E-03   .3472153E-03   .3171867E-03   .2989424E-03   .2960031E-03
   .2911258E-03   .2705907E-03   .2605032E-03   .2710829E-03   .2947317E-03
   .3244322E-03   .3549103E-03   .3830857E-03   .4002516E-03   .2887965E-03
  -.1009412E-03  -.5602904E-03  -.8383440E-03  -.7833343E-03  -.3281383E-03
   .2080738E-03   .5095949E-03   .5277206E-03   .4410248E-03   .5359955E-03
   .8348312E-03   .1118589E-02   .1439680E-02   .1574709E-02   .1468534E-02
   .1318072E-02   .1060157E-02   .8111063E-03   .6866726E-03   .6897846E-03
   .7517051E-03   .8060490E-03   .8222181E-03   .8131476E-03   .9246659E-03
   .1439830E-02   .2297591E-02   .2926066E-02   .2860787E-02   .2224373E-02
   .1326501E-02   .6235862E-03   .3414704E-03   .3888937E-03   .5435080E-03
   .6384204E-03   .6315675E-03   .5665742E-03   .5072619E-03   .5924954E-03
   .9834565E-03   .1473314E-02   .1806925E-02   .1923030E-02   .1916292E-02
   .1886199E-02   .1886795E-02   .1944729E-02   .2024871E-02   .2062178E-02
   .1937998E-02   .1630199E-02   .1408150E-02   .1289925E-02   .1450342E-02
   .1775658E-02   .2031758E-02   .1995789E-02   .1552139E-02   .1120288E-02
   .1166064E-02   .1549248E-02   .1913899E-02   .2164348E-02   .2356699E-02
   .2271892E-02   .1991841E-02   .1733020E-02   .1500544E-02   .1126840E-02
   .7261818E-03   .3611049E-03   .1113274E-04  -.1738300E-03  -.3857212E-03
  -.6387342E-03  -.8368819E-03  -.9374139E-03  -.9659585E-03  -.9876618E-03
  -.1160023E-02  -.1638319E-02  -.2192368E-02  -.2561359E-02  -.2681626E-02
  -.2627343E-02  -.2539389E-02  -.2518732E-02  -.2555454E-02  -.2586150E-02
  -.2592275E-02  -.2687928E-02  -.2925964E-02  -.2968618E-02  -.2786025E-02
  -.2551787E-02  -.2310841E-02  -.2014946E-02  -.1973502E-02  -.2317922E-02
  -.2964976E-02  -.3582848E-02  -.3793986E-02  -.3510898E-02  -.3169530E-02
  -.2851190E-02  -.2652490E-02  -.2833315E-02  -.3260775E-02  -.3544378E-02
  -.3324482E-02  -.2770214E-02  -.2272277E-02  -.1964572E-02  -.1705521E-02
  -.1586206E-02  -.1431049E-02  -.1179097E-02  -.9488492E-03  -.7539532E-03
  -.4887196E-03  -.4114351E-03  -.5800394E-03  -.7167728E-03  -.4798226E-03
   .2146290E-04   .4534891E-03   .5585495E-03   .1840932E-03  -.4054167E-03
  -.8299354E-03  -.8677198E-03  -.4214790E-03   .2115137E-03   .6323904E-03
   .7133871E-03   .5797948E-03   .4218563E-03   .3311811E-03   .3114391E-03
   .2513226E-03  -.9555236E-04  -.6266305E-03  -.1140988E-02  -.1685385E-02
  -.2162981E-02  -.2450255E-02  -.2543084E-02  -.2518583E-02  -.2460097E-02
  -.2406617E-02  -.2386929E-02  -.2393727E-02  -.2402131E-02  -.2404075E-02
  -.2472519E-02  -.2709221E-02  -.2891521E-02  -.3090311E-02  -.3331618E-02
  -.3515779E-02  -.3598469E-02  -.3579323E-02  -.3435929E-02  -.3059189E-02
  -.2597489E-02  -.2283484E-02  -.2187035E-02  -.2230980E-02  -.2295056E-02
  -.2303379E-02  -.2247224E-02  -.2157719E-02  -.2076053E-02  -.2026509E-02
  -.2015289E-02  -.2035900E-02  -.2071854E-02  -.2106653E-02  -.2131694E-02
  -.2148758E-02  -.2168324E-02  -.2259362E-02  -.2556926E-02  -.2739698E-02
  -.2611809E-02  -.2342867E-02  -.2131501E-02  -.2010544E-02  -.1728437E-02
  -.1233957E-02  -.5449522E-03   .1369623E-03   .5538216E-03   .6652996E-03
   .6039060E-03   .5231058E-03   .4994192E-03   .5129232E-03   .5002521E-03
   .2774215E-03   .1088547E-03   .2096207E-03   .4914305E-03   .9851072E-03
   .1483833E-02   .1496674E-02   .8666668E-03   .1990674E-03  -.2459108E-03
  -.5175251E-03  -.6372721E-03  -.7043714E-03  -.9547992E-03  -.1151219E-02
  -.1132058E-02  -.1237047E-02  -.1566273E-02  -.1911656E-02  -.2112388E-02
  -.2155093E-02  -.2118435E-02  -.2082335E-02  -.2029915E-02  -.1679169E-02
  -.8737133E-03  -.2175930E-04   .2969064E-03   .2356151E-03  -.3365940E-05
  -.7784798E-04   .1483362E-03   .4850958E-03   .7346600E-03   .8109152E-03
   .7635618E-03   .6963950E-03   .6749918E-03   .7479051E-03   .1097144E-02
   .1623569E-02   .2035184E-02   .2196804E-02   .2153212E-02   .2050247E-02
   .1953812E-02   .1665992E-02   .1219506E-02   .8572323E-03   .7037750E-03
   .7232443E-03   .8125499E-03   .9262019E-03   .1234355E-02   .1726864E-02
   .2332008E-02   .2766437E-02   .2969344E-02   .3126681E-02   .3068659E-02
   .2717241E-02   .2325372E-02   .2104629E-02   .2033510E-02   .1811553E-02
   .1321107E-02   .8143415E-03   .5482485E-03   .7029032E-03   .1000317E-02
   .1045961E-02   .8745368E-03   .7135722E-03   .8464779E-03   .1117978E-02
   .1196262E-02   .1083549E-02   .9238356E-03   .8295235E-03   .8115585E-03
   .8275059E-03   .8408740E-03   .8396538E-03   .8341685E-03   .8406525E-03
   .8756812E-03   .9235816E-03   .9630850E-03   .9900479E-03   .9965485E-03
   .9928963E-03   .9788711E-03   .9602417E-03   .9517863E-03   .9519923E-03
   .9595241E-03   .9740311E-03   .9935280E-03   .9785302E-03   .7114399E-03
   .8752959E-05  -.8477821E-03  -.1250128E-02  -.1029766E-02  -.6002420E-03
  -.5226354E-03  -.9198929E-03  -.1433301E-02  -.1751053E-02  -.1802946E-02
  -.1697078E-02  -.1576768E-02  -.1520164E-02  -.1492999E-02  -.1257090E-02
  -.7609305E-03  -.2847889E-03  -.2199051E-04   .2544119E-04  -.4214708E-04
  -.1093010E-03  -.1103672E-03  -.3153231E-04   .2209945E-03   .6974884E-03
   .1142387E-02   .1352941E-02   .1327095E-02   .1184162E-02   .9225516E-03
   .6432206E-03   .5236374E-03   .3729334E-03   .1877091E-03   .7207210E-04
   .2161345E-03   .5542826E-03   .8350530E-03   .1140625E-02   .1406099E-02
   .1539260E-02   .1411106E-02   .1113532E-02   .8877264E-03   .6283712E-03
   .3832366E-03   .2279237E-03   .1599897E-03   .1800112E-04  -.3914899E-03
  -.8711941E-03  -.1068695E-02  -.8847133E-03  -.7519266E-03  -.7250356E-03
  -.6468578E-03  -.6038156E-03  -.4085278E-03  -.1122479E-03   .1133783E-03
   .8780067E-04  -.1983863E-03  -.4351291E-03  -.6740789E-03  -.7671934E-03
  -.5955380E-03  -.5198656E-03  -.5277821E-03  -.4645075E-03  -.5443979E-03
  -.7697517E-03  -.9956858E-03  -.1122604E-02  -.1129389E-02  -.9896963E-03
  -.6888524E-03  -.4945555E-03  -.3334241E-03  -.2024930E-03  -.2751138E-03
  -.3612871E-03  -.4534360E-03  -.4334785E-03  -.4809118E-03  -.5933240E-03
  -.4395629E-03  -.4109464E-04   .4127737E-03   .9352239E-03   .1414185E-02
   .1704812E-02   .1803416E-02   .1808348E-02   .1821442E-02   .1866872E-02
   .1936690E-02   .1998261E-02   .2042001E-02   .1981517E-02   .1556000E-02
   .7906871E-03   .2760190E-03   .3324025E-03   .9298714E-03   .1664699E-02
   .2120095E-02   .2187644E-02   .2020417E-02   .1844793E-02   .1798381E-02
   .1859717E-02   .1949217E-02   .2016675E-02   .2049533E-02   .2063379E-02
   .2118190E-02   .2426479E-02   .2869021E-02   .2947297E-02   .2595649E-02
   .2149381E-02   .1877372E-02   .1832333E-02   .1919357E-02   .2033228E-02
   .2103277E-02   .2108405E-02   .2025952E-02   .1675837E-02   .1148961E-02
   .7288060E-03   .5424213E-03   .4916112E-03   .2454788E-03  -.2157041E-03
  -.6286565E-03  -.8235630E-03  -.8116851E-03  -.7058706E-03  -.6523332E-03
  -.8678159E-03  -.1339850E-02  -.1791157E-02  -.2030600E-02  -.2021831E-02
  -.1697190E-02  -.1186543E-02  -.9404827E-03  -.9563202E-03  -.9264156E-03
  -.8064052E-03  -.6705959E-03  -.5821028E-03  -.5505501E-03  -.5218076E-03
  -.3133184E-03  -.4308147E-04   .1921674E-03   .4769409E-03   .7247091E-03
   .8890233E-03   .1156173E-02   .1594143E-02   .1991526E-02   .2197024E-02
   .2219834E-02   .2130201E-02   .1871490E-02   .1620985E-02   .1460592E-02
   .1258193E-02   .1063844E-02   .9137497E-03   .6313246E-03   .1685272E-03
  -.2474828E-03  -.4585069E-03  -.4738230E-03  -.4176652E-03  -.5407286E-03
  -.9796389E-03  -.1498034E-02  -.2000930E-02  -.2537720E-02  -.2959311E-02
  -.3172812E-02  -.3221953E-02  -.3206906E-02  -.3182920E-02  -.3020676E-02
  -.2606217E-02  -.2161400E-02  -.1890381E-02  -.1819247E-02  -.1840431E-02
  -.1723120E-02  -.1476616E-02  -.1448621E-02  -.1632305E-02  -.1850006E-02
  -.1973026E-02  -.1962173E-02  -.1714889E-02  -.1197008E-02  -.6863630E-03
  -.4011803E-03  -.3519424E-03  -.4230478E-03  -.4961143E-03  -.5176108E-03
  -.4980083E-03  -.4706281E-03  -.4403442E-03  -.2767702E-03  -.6918046E-05
   .1716603E-03   .2428075E-03   .5660506E-04  -.2344766E-03  -.4340978E-03
  -.4795899E-03  -.4222960E-03  -.3277417E-03  -.7995748E-04   .5419415E-03
   .1254454E-02   .1505968E-02   .1166585E-02   .4339841E-03  -.2146241E-03
  -.5058453E-03  -.4823322E-03  -.3388907E-03  -.2411431E-03  -.2430745E-03
  -.3102088E-03  -.3828669E-03  -.4228018E-03  -.4279353E-03  -.4167522E-03
  -.4073173E-03  -.4075234E-03  -.4157984E-03  -.4243985E-03  -.4280816E-03
  -.4265791E-03  -.4229880E-03  -.4212455E-03  -.4222616E-03  -.4253540E-03
  -.4249439E-03  -.4189681E-03  -.4105453E-03  -.3989450E-03  -.3876833E-03
  -.3782399E-03  -.3554159E-03  -.1858132E-03   .9629706E-04   .3048310E-03
   .5703236E-03   .8391548E-03   .1020806E-02   .1098100E-02   .1110028E-02
   .1104923E-02   .1109963E-02   .1143500E-02   .1330200E-02   .1623109E-02
   .1830445E-02   .2085708E-02   .2340341E-02   .2504558E-02   .2562518E-02
   .2551707E-02   .2509195E-02   .2456415E-02   .2414165E-02   .2390313E-02
   .2381017E-02   .2387634E-02   .2395631E-02   .2257254E-02   .2000513E-02
   .1816514E-02   .1565128E-02   .1165944E-02   .7422227E-03   .4966133E-03
   .2570921E-03   .2597684E-04  -.1354569E-03  -.2308213E-03  -.4394104E-03
  -.8935815E-03  -.1368405E-02  -.1653614E-02  -.1739065E-02  -.1873362E-02
  -.2263140E-02  -.2708575E-02  -.2844964E-02  -.2496318E-02  -.1966949E-02
  -.1599258E-02  -.1503884E-02  -.1589260E-02  -.1702509E-02  -.1729356E-02
  -.1505261E-02  -.9766757E-03  -.4375559E-03  -.1260232E-03  -.5879084E-04
  -.1002803E-03   .7633489E-05   .2821256E-03   .3508901E-03   .1763391E-03
  -.6134599E-04  -.2164105E-03  -.2616963E-03  -.2428132E-03  -.8881761E-04
   .3395999E-03   .8383089E-03   .1040045E-02   .7262003E-03   .1893821E-03
  -.2020984E-03  -.3167372E-03  -.2386949E-03  -.1173794E-03  -.5011804E-04
  -.4119178E-04   .5189040E-04   .3008047E-03   .3791672E-03   .3558912E-03
   .5519052E-03   .9012815E-03   .1188444E-02   .1309575E-02   .1295114E-02
   .1234103E-02   .1195589E-02   .1193956E-02   .1210641E-02   .1245042E-02
   .1272490E-02   .1158901E-02   .7490906E-03   .2531833E-03  -.7811566E-04
  -.1874208E-03  -.2701300E-03  -.4900728E-03  -.6789785E-03  -.9507734E-03
  -.1252542E-02  -.1448823E-02  -.1390200E-02  -.1078943E-02  -.8207843E-03
  -.5470685E-03  -.2842430E-03  -.1121079E-03  -.4447252E-04  -.3958455E-04
  -.5081068E-04  -.5172453E-04  -.4155595E-04  -.3090895E-04  -.2876978E-04
  -.3627235E-04  -.4887798E-04  -.5982985E-04  -.6516574E-04  -.5573606E-04
   .8310657E-04   .4997840E-03   .9862362E-03   .1298144E-02   .1379871E-02
   .1331801E-02   .1389201E-02   .1759449E-02   .2135646E-02   .2205357E-02
   .2130077E-02   .1992721E-02   .2075277E-02   .2235802E-02   .2220735E-02
   .2140078E-02   .1892989E-02   .1652669E-02   .1664183E-02   .1570117E-02
   .1084389E-02   .4567922E-03   .1298218E-03   .3660241E-03   .8270715E-03
   .9984105E-03   .9372243E-03   .6499961E-03   .2640710E-03  -.7949101E-05
  -.9489417E-04  -.6512715E-04  -.3281442E-04  -.4822492E-04  -.9670055E-04
  -.1388846E-03  -.1380543E-03  -.1017348E-03  -.6142942E-04  -.3129216E-04
   .5849527E-04   .3167250E-03   .4437546E-03   .4138162E-03   .6499993E-03
   .1268044E-02   .1648424E-02   .1342806E-02   .6557489E-03   .9720635E-04
  -.1031889E-03  -.1997006E-04   .1491166E-03   .2519331E-03   .2510796E-03
   .1897190E-03   .1328334E-03   .1155079E-03   .1355552E-03   .1716065E-03
   .2021712E-03   .2172362E-03   .2183509E-03   .2124357E-03   .2054389E-03
   .1958720E-03   .1822585E-03   .1634803E-03   .1400784E-03   .1222541E-03
   .1889761E-03   .4431397E-03   .5664222E-03   .4333317E-03   .2069092E-03
   .4800210E-04   .4845630E-06  -.5815193E-04  -.3750327E-03  -.8564430E-03
  -.1243069E-02  -.1413028E-02  -.1411129E-02  -.1349538E-02  -.1304265E-02
  -.1216204E-02  -.8848991E-03  -.4173535E-03  -.5887338E-04   .8962027E-04
   .8249774E-04   .3158610E-04   .1542253E-04   .4780844E-04   .1014721E-03
   .1455996E-03   .1646366E-03   .1607857E-03   .1479241E-03   .1402178E-03
   .1439039E-03   .1575210E-03   .1737263E-03   .1962110E-03   .2992926E-03
   .5888528E-03   .8252916E-03   .1061293E-02   .1322861E-02   .1516193E-02
   .1597654E-02   .1595066E-02   .1546893E-02   .1431052E-02   .1147378E-02
   .9261360E-03   .6968826E-03   .4206399E-03   .1137211E-03  -.3558533E-03
  -.8725963E-03  -.1218537E-02  -.1255384E-02  -.9572933E-03  -.6807789E-03
  -.5180902E-03  -.6306915E-03  -.9525182E-03  -.1238952E-02  -.1353260E-02
  -.1308632E-02  -.1120147E-02  -.6874888E-03  -.1738634E-03   .1758667E-03
   .2840508E-03   .1594643E-03  -.1828710E-03  -.4342788E-03  -.6458537E-03
  -.8786114E-03  -.1072746E-02  -.1104005E-02  -.7931592E-03  -.3102174E-03
   .4784671E-04   .1646526E-03   .4438654E-04  -.2906172E-03  -.4584225E-03
  -.4058526E-03  -.5008963E-03  -.8008556E-03  -.1109297E-02  -.1285172E-02
  -.1318228E-02  -.1277126E-02  -.1233207E-02  -.1220353E-02  -.1234982E-02
  -.1246885E-02  -.1159559E-02  -.7910105E-03  -.2854135E-03   .8817695E-04
   .2270111E-03   .1970075E-03   .1186935E-03   .7574083E-04   .8646204E-04
   .1214675E-03   .1403113E-03   .4795167E-04  -.3274641E-03  -.8344644E-03
  -.1211249E-02  -.1430985E-02  -.1723689E-02  -.2088485E-02  -.2372450E-02
  -.2503050E-02  -.2513089E-02  -.2478493E-02  -.2457140E-02  -.2464534E-02
  -.2487524E-02  -.2505393E-02  -.2506889E-02  -.2494830E-02  -.2477518E-02
  -.2463275E-02  -.2454285E-02  -.2448462E-02  -.2442317E-02  -.2426253E-02
  -.2323438E-02  -.1963596E-02  -.1479709E-02  -.1117966E-02  -.9000769E-03
  -.6578850E-03  -.5001625E-03  -.3011269E-03  -.3535363E-04   .1881432E-03
   .3147463E-03   .3419142E-03   .3126399E-03   .2799873E-03   .2754399E-03
   .3645177E-03   .6244135E-03   .7455204E-03   .6110000E-03   .3851158E-03
   .2377918E-03   .2029505E-03   .2343545E-03   .2673225E-03   .1866057E-03
  -.2455262E-03  -.1032504E-02  -.1725378E-02  -.1849761E-02  -.1511317E-02
  -.1179961E-02  -.1273448E-02  -.1706161E-02  -.2149810E-02  -.2387940E-02
  -.2404418E-02  -.2310635E-02  -.2223316E-02  -.2197680E-02  -.2228760E-02
  -.2289969E-02  -.2322536E-02  -.2208630E-02  -.1821502E-02  -.1330130E-02
  -.9821562E-03  -.8569164E-03  -.8805867E-03  -.9321561E-03  -.8668719E-03
  -.5172249E-03  -.3477638E-04   .3180914E-03   .4421987E-03   .4013309E-03
   .3080790E-03   .2623587E-03   .2883963E-03   .3495642E-03   .4289143E-03
   .7037410E-03   .1120070E-02   .1486536E-02   .1887441E-02   .2318288E-02
   .2631304E-02   .2762312E-02   .2760424E-02   .2714618E-02   .2686303E-02
   .2689165E-02   .2704774E-02   .2711135E-02   .2699704E-02   .2675967E-02
   .2645733E-02   .2577934E-02   .2299419E-02   .1869180E-02   .1521074E-02
   .1368613E-02   .1369561E-02   .1395916E-02   .1220819E-02   .8148821E-03
   .4184318E-03   .2150428E-03   .2086060E-03   .2884919E-03   .3493005E-03
   .3491640E-03   .3066874E-03   .2685945E-03   .2603701E-03   .2712787E-03
   .2833227E-03   .2965538E-03   .3137987E-03   .3276236E-03   .3587744E-03
   .5278698E-03   .7288439E-03   .8752207E-03   .1079432E-02   .1281138E-02
   .1277892E-02   .9904611E-03   .7476990E-03   .7185712E-03   .6940735E-03
   .6261139E-03   .5508355E-03   .4990904E-03   .4783155E-03   .4920791E-03
   .6387999E-03   .9770922E-03   .1318651E-02   .1504175E-02   .1522271E-02
   .1454394E-02   .1393334E-02   .1369811E-02   .1245434E-02   .9128515E-03
   .4708876E-03   .5382198E-04  -.4603462E-04   .1236759E-03   .3391558E-03
   .4488964E-03   .4358137E-03   .3627501E-03   .2972382E-03   .2717224E-03
   .2773680E-03   .2903304E-03   .2927213E-03   .2823433E-03   .2673747E-03
   .2550121E-03   .2488143E-03   .2472501E-03   .2478406E-03   .2484844E-03
   .2474130E-03   .2437625E-03   .2371285E-03   .2278648E-03   .2156545E-03
   .1966493E-03   .1633309E-03   .6340962E-04  -.1976752E-03  -.4464420E-03
  -.4618118E-03  -.3610863E-03  -.1757746E-03   .3305935E-04   .1670291E-03
   .2015439E-03   .1757554E-03   .1384087E-03   .7343096E-04  -.8175864E-04
  -.2013158E-03  -.3309950E-03  -.4894958E-03  -.6160135E-03  -.6777509E-03
  -.6883671E-03  -.6786523E-03  -.6720120E-03  -.6719966E-03  -.6301623E-03
  -.4775503E-03  -.3349384E-03  -.1703315E-03   .1043808E-04   .1350827E-03
   .1774287E-03   .1571705E-03   .6687753E-04  -.1673130E-03  -.4649603E-03
  -.6714869E-03  -.7086570E-03  -.5028816E-03  -.1715119E-03   .7686078E-04
   .1576633E-03   .1161096E-03   .4197299E-04  -.1020460E-04  -.2635271E-04
  -.1613947E-04   .5545132E-05   .1451396E-04   .3098652E-05  -.9405200E-05
  -.1885197E-04  -.2353540E-04  -.5225816E-04  -.2151276E-03  -.4698052E-03
  -.6705966E-03  -.7498016E-03  -.7352622E-03  -.6906552E-03  -.6663216E-03
  -.7046909E-03  -.8753624E-03  -.1027561E-02  -.1146402E-02  -.1271137E-02
  -.1362044E-02  -.1397706E-02  -.1391508E-02  -.1368670E-02  -.1347790E-02
  -.1333304E-02  -.1316045E-02  -.1295917E-02  -.1281430E-02  -.1285031E-02
  -.1372327E-02  -.1459473E-02  -.1401856E-02  -.1162497E-02  -.8315871E-03
  -.5874538E-03  -.5031629E-03  -.5300132E-03  -.5798933E-03  -.5827263E-03
  -.4508726E-03  -.2028043E-03   .1835317E-04   .1256731E-03   .1304585E-03
   .9136236E-04   .5436609E-04   .3781426E-04   .4543072E-04   .6407258E-04
   .6983772E-04   .5872863E-04   .3971375E-04   .3204772E-04   .1168178E-03
   .2978674E-03   .4517695E-03   .4330280E-03   .2317542E-03  -.6240777E-04
  -.2723636E-03  -.2760061E-03  -.1569407E-03  -.4407036E-04  -.1609452E-04
  -.1363584E-03  -.3644320E-03  -.5588794E-03  -.6405579E-03  -.6363896E-03
  -.6691352E-03  -.7899888E-03  -.9207848E-03  -.9905098E-03  -.9880568E-03
  -.9446660E-03  -.8971573E-03  -.8660535E-03  -.8555476E-03  -.8556805E-03
  -.8505837E-03  -.8335263E-03  -.8069595E-03  -.7768979E-03  -.7481887E-03
  -.7146238E-03  -.6339522E-03  -.5439815E-03  -.4778483E-03  -.4477922E-03
  -.4282032E-03  -.3661671E-03  -.2854380E-03  -.2181112E-03  -.1367633E-03
  -.1429570E-04   .6112851E-04   .5600174E-04   .2436697E-04  -.5842020E-05
  -.9430165E-05  -.3418891E-04  -.3806251E-04  -.5740637E-05   .3832744E-04
   .1104144E-03   .1797538E-03   .2179316E-03   .2243900E-03   .2146793E-03
   .2050471E-03   .2029602E-03   .2054738E-03   .2072106E-03   .2083340E-03
   .2127372E-03   .2218362E-03   .2313049E-03   .2373176E-03   .2396275E-03
   .2394468E-03   .2383413E-03   .2372867E-03   .2363895E-03   .2359325E-03
   .2351921E-03   .2342321E-03   .2329159E-03   .2277291E-03   .1913472E-03
   .8547370E-04  -.5734726E-04  -.1383851E-03  -.1095191E-03  -.2584686E-04
   .4414373E-04   .6918892E-04   .3770434E-04  -.3468380E-04  -.7144924E-04
  -.2952306E-04   .4862695E-04   .1099919E-03   .1344855E-03   .1318886E-03
   .1225019E-03   .1204879E-03   .1279895E-03   .1402398E-03   .1498526E-03
   .1536488E-03   .1553811E-03   .1606642E-03   .1845345E-03   .2359289E-03
   .2871555E-03   .3156534E-03   .3202971E-03   .3131467E-03   .3061829E-03
   .3056626E-03   .3110290E-03   .3170792E-03   .3195256E-03   .3177184E-03
   .3135511E-03   .3091662E-03   .3053359E-03   .3022550E-03   .2993630E-03
   .2962613E-03   .2932174E-03   .2906575E-03   .2886796E-03   .2869094E-03
   .2848444E-03   .2824062E-03   .2790706E-03   .2742817E-03   .2694277E-03
   .2654367E-03   .2624802E-03   .2606284E-03   .2598358E-03   .2587428E-03
   .2564210E-03   .2532183E-03   .2491834E-03   .2395557E-03   .2229445E-03
   .2112666E-03   .1994190E-03   .1934556E-03   .2036121E-03   .2208605E-03
   .2324867E-03   .2339772E-03   .2282397E-03   .2207978E-03   .2151769E-03
   .2118986E-03   .2097844E-03   .2075981E-03   .2047402E-03   .2014828E-03
   .1982970E-03   .1955085E-03   .1930331E-03   .1907144E-03   .1883140E-03
   .1856563E-03   .1827337E-03   .1796361E-03   .1765168E-03   .1736086E-03
   .1707441E-03   .1677218E-03   .1644920E-03   .1612057E-03   .1578944E-03
   .1546031E-03   .1513341E-03   .1479826E-03   .1433678E-03   .1347613E-03
   .1246956E-03   .1185792E-03   .1189630E-03   .1197639E-03   .1165905E-03
   .1092413E-03   .1034058E-03   .1029660E-03   .1080708E-03   .1146605E-03
   .1176711E-03   .1144867E-03   .1094815E-03   .1062653E-03   .1032076E-03
   .1008366E-03   .9850217E-04   .9689426E-04   .9637084E-04   .9564276E-04
   .9395738E-04   .9149114E-04   .8882400E-04   .8633158E-04   .8412667E-04
   .8227070E-04   .8060330E-04   .7881039E-04   .7694704E-04   .7584990E-04
   .7510882E-04   .7291233E-04   .6925801E-04   .6543840E-04   .6237510E-04
   .6014250E-04   .5827684E-04   .5641306E-04   .5438726E-04   .5191213E-04
   .4943457E-04   .4733186E-04   .4573508E-04   .4467057E-04   .4368708E-04
   .4245902E-04   .4093537E-04   .3933768E-04   .3780222E-04   .3635147E-04
   .3496177E-04   .3348344E-04   .3193311E-04   .3052813E-04   .2936961E-04
   .2840790E-04   .2755206E-04   .2673019E-04   .2590116E-04   .2504696E-04
   .2418823E-04   .2334506E-04   .2252605E-04   .2179066E-04   .2110192E-04
   .2042109E-04   .1973710E-04   .1904961E-04   .1840047E-04   .1780911E-04
   .1725208E-04   .1672086E-04   .1621217E-04   .1571793E-04   .1525258E-04
   .1480873E-04   .1437649E-04   .1395679E-04   .1355992E-04   .1319461E-04
   .1285752E-04   .1253773E-04   .1223394E-04   .1194805E-04   .1168227E-04
   .1143382E-04   .1120074E-04   .1098000E-04   .1076861E-04   .1056581E-04
   .1037057E-04   .1018200E-04   .9999396E-05   .9821739E-05   .9647245E-05
   .9473864E-05
