# Supplementary material for: Earthquake Response Analysis of Tall Reinforced Concrete Chimneys considering Eccentricity
Source: Hindawi journal article supplement (doi:10.1155/2020/1417969), 2020-03-11
Supplement: f1 [file 1417969.f1.zip › 1417969.f1/Four kinds of earthquake records/Soft rock/LOMAP CLS000.txt]

PEER STRONG MOTION DATABASE RECORD. PROCESSING BY PACIFIC ENGINEERING.
LOMA PRIETA 10/18/89 00:05, CORRALITOS, 000 (CDMG STATION 57007)
ACCELERATION TIME HISTORY IN UNITS OF G. FILTER POINTS: HP=0.2 Hz LP=40.0 Hz
NPTS=  7989, DT= .00500 SEC
  -.1217645E-01  -.1314127E-01  -.5469087E-02   .4831529E-02   .3224641E-02
   .3192001E-02   .3181079E-02   .3199462E-02   .3250168E-02   .3327832E-02
   .3427052E-02   .3534872E-02   .3629651E-02   .3702160E-02   .3755660E-02
   .3795593E-02   .3828467E-02   .3851509E-02   .3858719E-02   .3856894E-02
   .3856126E-02   .3857413E-02   .3854472E-02   .3839472E-02   .3810588E-02
   .3774457E-02   .3742094E-02   .3719522E-02   .3708610E-02   .3707926E-02
   .3714008E-02   .3726921E-02   .3744465E-02   .3775288E-02   .3820296E-02
   .3870820E-02   .3924870E-02   .3958613E-02   .3952930E-02   .3922051E-02
   .3883039E-02   .3839645E-02   .3797403E-02   .3741926E-02   .3652390E-02
   .3544929E-02   .3443473E-02   .3357117E-02   .3280448E-02   .3214391E-02
   .3172516E-02   .3164818E-02   .3173885E-02   .3179749E-02   .3207400E-02
   .3282766E-02   .3389903E-02   .3498006E-02   .3614626E-02   .3757303E-02
   .3905955E-02   .4022366E-02   .4097313E-02   .4173272E-02   .4261212E-02
   .4313293E-02   .4326821E-02   .4344095E-02   .4361252E-02   .4371934E-02
   .4408904E-02   .4468104E-02   .4527690E-02   .4604119E-02   .4712553E-02
   .4838069E-02   .4963701E-02   .5064654E-02   .5109006E-02   .5109192E-02
   .5097645E-02   .5060038E-02   .4941272E-02   .4687048E-02   .4310427E-02
   .3891916E-02   .3450813E-02   .2953917E-02   .2456226E-02   .2048287E-02
   .1725492E-02   .1443551E-02   .1205646E-02   .1030396E-02   .8732186E-03
   .6781777E-03   .4965009E-03   .4327224E-03   .5724034E-03   .9144158E-03
   .1364249E-02   .1841668E-02   .2329736E-02   .2883375E-02   .3500741E-02
   .4060716E-02   .4393318E-02   .4393727E-02   .4161112E-02   .3859818E-02
   .3512109E-02   .3028719E-02   .2414518E-02   .1790082E-02   .1238780E-02
   .8084538E-03   .4481444E-03   .4449047E-04  -.4151898E-03  -.9359354E-03
  -.1519856E-02  -.2039002E-02  -.2492387E-02  -.3115878E-02  -.3987362E-02
  -.4906189E-02  -.5662853E-02  -.6255057E-02  -.6789682E-02  -.7228743E-02
  -.7346012E-02  -.6866108E-02  -.5842678E-02  -.4705312E-02  -.3620148E-02
  -.2341300E-02  -.7255652E-03   .1186478E-02   .3488587E-02   .6134820E-02
   .8582509E-02   .1040857E-01   .1190882E-01   .1349453E-01   .1501327E-01
   .1606854E-01   .1655222E-01   .1665525E-01   .1639930E-01   .1557576E-01
   .1412119E-01   .1211975E-01   .9780282E-02   .7446712E-02   .5262720E-02
   .3099890E-02   .9710424E-03  -.9659615E-03  -.2873813E-02  -.5086146E-02
  -.7591800E-02  -.1006525E-01  -.1200592E-01  -.1301064E-01  -.1318899E-01
  -.1292544E-01  -.1244862E-01  -.1183848E-01  -.1098535E-01  -.9651422E-02
  -.7704417E-02  -.5199758E-02  -.2353223E-02   .6514681E-03   .3628378E-02
   .6511263E-02   .9445526E-02   .1219984E-01   .1427348E-01   .1579670E-01
   .1750697E-01   .1964771E-01   .2160725E-01   .2306258E-01   .2445297E-01
   .2606488E-01   .2763051E-01   .2866601E-01   .2898502E-01   .2900431E-01
   .2930878E-01   .2970771E-01   .2888711E-01   .2584043E-01   .2096912E-01
   .1546753E-01   .1069170E-01   .7438217E-02   .5376323E-02   .3713726E-02
   .2214735E-02   .1247925E-02   .1169322E-02   .2036933E-02   .4046672E-02
   .7397155E-02   .1158040E-01   .1581944E-01   .1933583E-01   .2126141E-01
   .2139178E-01   .2017947E-01   .1783313E-01   .1420353E-01   .9353831E-02
   .3590094E-02  -.2786175E-02  -.9361753E-02  -.1530248E-01  -.1966558E-01
  -.2245531E-01  -.2428774E-01  -.2483703E-01  -.2316537E-01  -.1943913E-01
  -.1474606E-01  -.9867774E-02  -.5293755E-02  -.1836028E-02  -.2333564E-03
  -.1526554E-03  -.6662677E-03  -.1484218E-02  -.2871421E-02  -.4441850E-02
  -.4890160E-02  -.3321143E-02  -.2213147E-03   .2905454E-02   .5218958E-02
   .7163078E-02   .9051854E-02   .1071646E-01   .1203355E-01   .1290186E-01
   .1308183E-01   .1243883E-01   .1091896E-01   .8390357E-02   .5463772E-02
   .3335164E-02   .2273376E-02   .1688047E-02   .1287427E-02   .1057436E-02
   .5891693E-03  -.6503413E-03  -.2560693E-02  -.4695749E-02  -.6773590E-02
  -.8791082E-02  -.1052568E-01  -.1135051E-01  -.1119076E-01  -.1033432E-01
  -.8793124E-02  -.6685355E-02  -.4283515E-02  -.2039319E-02  -.2728858E-03
   .1028133E-02   .1334481E-02   .3223290E-03  -.1372727E-02  -.3270152E-02
  -.5349206E-02  -.7357489E-02  -.8789235E-02  -.9396806E-02  -.9159296E-02
  -.7827371E-02  -.5279609E-02  -.2215005E-02   .7092230E-03   .3611453E-02
   .6475976E-02   .8749612E-02   .1019580E-01   .1079592E-01   .1033042E-01
   .8713737E-02   .5288684E-02  -.4496246E-03  -.7050007E-02  -.1242413E-01
  -.1579073E-01  -.1762174E-01  -.1856717E-01  -.1926880E-01  -.2083482E-01
  -.2345785E-01  -.2608465E-01  -.2802014E-01  -.2907952E-01  -.2920568E-01
  -.2842647E-01  -.2667130E-01  -.2344819E-01  -.1816449E-01  -.1117633E-01
  -.3466536E-02   .4218279E-02   .1123433E-01   .1732120E-01   .2256492E-01
   .2686462E-01   .2991917E-01   .3141119E-01   .3121723E-01   .2994106E-01
   .2891770E-01   .2866136E-01   .2879658E-01   .2898983E-01   .2874663E-01
   .2759673E-01   .2519651E-01   .2089199E-01   .1397935E-01   .4849133E-02
  -.4676087E-02  -.1212111E-01  -.1589569E-01  -.1649003E-01  -.1572335E-01
  -.1417615E-01  -.1011358E-01  -.2159192E-02   .8475870E-02   .1915609E-01
   .2773090E-01   .3313833E-01   .3540126E-01   .3505276E-01   .3205250E-01
   .2590552E-01   .1661639E-01   .4750146E-02  -.8737044E-02  -.2210203E-01
  -.3329338E-01  -.4119926E-01  -.4581575E-01  -.4785183E-01  -.4829050E-01
  -.4748235E-01  -.4490326E-01  -.4017514E-01  -.3323357E-01  -.2409216E-01
  -.1237064E-01   .2014883E-02   .1734549E-01   .3133045E-01   .4195043E-01
   .4807964E-01   .4959439E-01   .4746169E-01   .4370372E-01   .3850390E-01
   .3032805E-01   .1850720E-01   .4305676E-02  -.1022609E-01  -.2409491E-01
  -.3657377E-01  -.4614204E-01  -.5139370E-01  -.5203297E-01  -.4876739E-01
  -.4267642E-01  -.3407232E-01  -.2169132E-01  -.4450020E-02   .1497847E-01
   .3010489E-01   .3592749E-01   .3301045E-01   .2461823E-01   .1311719E-01
  -.2612144E-03  -.1510586E-01  -.3001675E-01  -.4254409E-01  -.5132467E-01
  -.5646585E-01  -.5885300E-01  -.5885554E-01  -.5571049E-01  -.4888256E-01
  -.3871102E-01  -.2539789E-01  -.9702960E-02   .7534169E-02   .2631105E-01
   .4634079E-01   .6665946E-01   .8470633E-01   .9727796E-01   .1038687E+00
   .1072831E+00   .1098704E+00   .1114230E+00   .1104334E+00   .1046380E+00
   .9303070E-01   .7788919E-01   .6381892E-01   .5461899E-01   .5059540E-01
   .5079568E-01   .5482547E-01   .6254604E-01   .7356541E-01   .8524274E-01
   .9486487E-01   .1031500E+00   .1126150E+00   .1241757E+00   .1359378E+00
   .1448739E+00   .1494293E+00   .1499292E+00   .1487392E+00   .1480693E+00
   .1474038E+00   .1460708E+00   .1445693E+00   .1433814E+00   .1420169E+00
   .1402103E+00   .1389424E+00   .1385937E+00   .1389056E+00   .1393212E+00
   .1387947E+00   .1367956E+00   .1329526E+00   .1265894E+00   .1172284E+00
   .1044947E+00   .8811795E-01   .6876445E-01   .4855136E-01   .2785410E-01
   .4651823E-02  -.2196226E-01  -.5125516E-01  -.8251492E-01  -.1160728E+00
  -.1512503E+00  -.1847939E+00  -.2143409E+00  -.2413525E+00  -.2675980E+00
  -.2927226E+00  -.3157988E+00  -.3371523E+00  -.3574354E+00  -.3761479E+00
  -.3934770E+00  -.4103437E+00  -.4272773E+00  -.4438436E+00  -.4589236E+00
  -.4716656E+00  -.4817926E+00  -.4885212E+00  -.4913885E+00  -.4913724E+00
  -.4901894E+00  -.4891872E+00  -.4870874E+00  -.4821964E+00  -.4753132E+00
  -.4680935E+00  -.4617729E+00  -.4565572E+00  -.4506492E+00  -.4429863E+00
  -.4348961E+00  -.4273981E+00  -.4210719E+00  -.4160920E+00  -.4112720E+00
  -.4046465E+00  -.3943306E+00  -.3780935E+00  -.3518834E+00  -.3112129E+00
  -.2544005E+00  -.1882681E+00  -.1271018E+00  -.7649886E-01  -.3144375E-01
   .1108632E-01   .5228805E-01   .9312959E-01   .1353273E+00   .1814047E+00
   .2321458E+00   .2885516E+00   .3497999E+00   .4140332E+00   .4769721E+00
   .5274255E+00   .5594715E+00   .5794049E+00   .5940301E+00   .6042466E+00
   .6092029E+00   .6117103E+00   .6168164E+00   .6258735E+00   .6363349E+00
   .6437445E+00   .6426076E+00   .6283830E+00   .5986603E+00   .5528756E+00
   .4924659E+00   .4229738E+00   .3562947E+00   .3014422E+00   .2554117E+00
   .2113590E+00   .1673928E+00   .1251776E+00   .8674447E-01   .5241543E-01
   .1866010E-01  -.1789784E-01  -.5875231E-01  -.1070338E+00  -.1623305E+00
  -.2162307E+00  -.2581795E+00  -.2768340E+00  -.2612016E+00  -.2170945E+00
  -.1724767E+00  -.1528953E+00  -.1637916E+00  -.1942774E+00  -.2230103E+00
  -.2318516E+00  -.2226013E+00  -.2129676E+00  -.2167567E+00  -.2286589E+00
  -.2299522E+00  -.2079691E+00  -.1640429E+00  -.1099853E+00  -.5791459E-01
  -.8204568E-02   .4661175E-01   .1085151E+00   .1709445E+00   .2241898E+00
   .2642101E+00   .2940847E+00   .3146597E+00   .3244039E+00   .3266536E+00
   .3276355E+00   .3295555E+00   .3312362E+00   .3322321E+00   .3332451E+00
   .3346520E+00   .3360682E+00   .3371128E+00   .3368579E+00   .3340744E+00
   .3270480E+00   .3107013E+00   .2791038E+00   .2343301E+00   .1820732E+00
   .1216813E+00   .5071005E-01  -.2589058E-01  -.9534583E-01  -.1506483E+00
  -.1973595E+00  -.2438916E+00  -.2931628E+00  -.3409224E+00  -.3820969E+00
  -.4164943E+00  -.4462658E+00  -.4721666E+00  -.4933144E+00  -.5075371E+00
  -.5126278E+00  -.5088147E+00  -.4980582E+00  -.4823834E+00  -.4626755E+00
  -.4390649E+00  -.4113084E+00  -.3783363E+00  -.3390966E+00  -.2946222E+00
  -.2478769E+00  -.2013661E+00  -.1528787E+00  -.9406730E-01  -.2362149E-01
   .4316168E-01   .8965065E-01   .1156254E+00   .1313779E+00   .1436787E+00
   .1532553E+00   .1580290E+00   .1573038E+00   .1541085E+00   .1523301E+00
   .1533486E+00   .1565610E+00   .1613352E+00   .1667172E+00   .1717840E+00
   .1758395E+00   .1773855E+00   .1757832E+00   .1726518E+00   .1700880E+00
   .1674160E+00   .1613135E+00   .1503428E+00   .1372546E+00   .1265367E+00
   .1201435E+00   .1166274E+00   .1141496E+00   .1124958E+00   .1126059E+00
   .1154083E+00   .1200974E+00   .1251296E+00   .1317795E+00   .1422199E+00
   .1556252E+00   .1693350E+00   .1822364E+00   .1948820E+00   .2078574E+00
   .2199183E+00   .2260875E+00   .2187084E+00   .1919298E+00   .1475206E+00
   .9501441E-01   .4637740E-01   .1115060E-01  -.8856894E-02  -.1972849E-01
  -.2775068E-01  -.3441006E-01  -.3800041E-01  -.3797624E-01  -.3539488E-01
  -.3119065E-01  -.2611501E-01  -.2017464E-01  -.1385511E-01  -.8958936E-02
  -.7488751E-02  -.9454063E-02  -.1277505E-01  -.1716302E-01  -.2410612E-01
  -.3394800E-01  -.4544881E-01  -.5555893E-01  -.6244011E-01  -.6813632E-01
  -.7557765E-01  -.8514410E-01  -.9538702E-01  -.1058150E+00  -.1157844E+00
  -.1228399E+00  -.1248775E+00  -.1229900E+00  -.1197961E+00  -.1162158E+00
  -.1098479E+00  -.9858084E-01  -.8477112E-01  -.7207147E-01  -.6150888E-01
  -.5112013E-01  -.4009070E-01  -.2925249E-01  -.1899688E-01  -.9631179E-02
  -.8946972E-03   .7334494E-02   .1411209E-01   .1904128E-01   .2383919E-01
   .2994681E-01   .3807642E-01   .4893439E-01   .6189383E-01   .7477331E-01
   .8441587E-01   .8928798E-01   .8936297E-01   .8568304E-01   .8047553E-01
   .7429639E-01   .6676079E-01   .5706889E-01   .4515674E-01   .3303669E-01
   .2198912E-01   .1219613E-01   .3299800E-02  -.4584902E-02  -.1071516E-01
  -.1513350E-01  -.1810005E-01  -.2009079E-01  -.2235707E-01  -.2631303E-01
  -.3143254E-01  -.3588214E-01  -.3824081E-01  -.3810763E-01  -.3739277E-01
  -.3828357E-01  -.4142935E-01  -.4678311E-01  -.5513784E-01  -.6804917E-01
  -.8453296E-01  -.1023054E+00  -.1194265E+00  -.1343667E+00  -.1475774E+00
  -.1587592E+00  -.1659069E+00  -.1677493E+00  -.1657901E+00  -.1627287E+00
  -.1589475E+00  -.1542418E+00  -.1491929E+00  -.1443431E+00  -.1409910E+00
  -.1402837E+00  -.1418804E+00  -.1441899E+00  -.1461486E+00  -.1481267E+00
  -.1509084E+00  -.1559109E+00  -.1633189E+00  -.1712411E+00  -.1794023E+00
  -.1892089E+00  -.2004905E+00  -.2104486E+00  -.2124752E+00  -.1980306E+00
  -.1618928E+00  -.1068143E+00  -.4416518E-01   .1256913E-01   .5375052E-01
   .7996202E-01   .1013499E+00   .1251109E+00   .1504413E+00   .1725307E+00
   .1887079E+00   .2006655E+00   .2105288E+00   .2185037E+00   .2234763E+00
   .2250866E+00   .2236715E+00   .2197910E+00   .2155548E+00   .2092494E+00
   .1935134E+00   .1679625E+00   .1420932E+00   .1217824E+00   .1028497E+00
   .7785769E-01   .4560089E-01   .1212578E-01  -.1862719E-01  -.5026919E-01
  -.8588294E-01  -.1206412E+00  -.1477802E+00  -.1668358E+00  -.1813474E+00
  -.1943069E+00  -.2084752E+00  -.2249876E+00  -.2416584E+00  -.2557572E+00
  -.2660520E+00  -.2716711E+00  -.2699429E+00  -.2588289E+00  -.2413313E+00
  -.2218859E+00  -.2020599E+00  -.1815649E+00  -.1601632E+00  -.1381040E+00
  -.1160723E+00  -.9425874E-01  -.7256481E-01  -.5123959E-01  -.3093083E-01
  -.1325586E-01   .2307315E-02   .1774272E-01   .3256317E-01   .4495069E-01
   .5417723E-01   .6219082E-01   .7192605E-01   .8423930E-01   .9722747E-01
   .1086738E+00   .1191861E+00   .1310368E+00   .1452333E+00   .1607348E+00
   .1773854E+00   .1962952E+00   .2154441E+00   .2312676E+00   .2413792E+00
   .2425537E+00   .2327506E+00   .2137251E+00   .1898431E+00   .1670944E+00
   .1507809E+00   .1418152E+00   .1372170E+00   .1341352E+00   .1314949E+00
   .1305363E+00   .1331266E+00   .1373175E+00   .1380600E+00   .1334500E+00
   .1263687E+00   .1198015E+00   .1138441E+00   .1065462E+00   .9768481E-01
   .8977326E-01   .8444927E-01   .8081665E-01   .7719225E-01   .7349930E-01
   .7077497E-01   .6910971E-01   .6654440E-01   .5969472E-01   .4718831E-01
   .3251091E-01   .2128593E-01   .1581467E-01   .1373038E-01   .1052810E-01
   .2704022E-02  -.9732233E-02  -.2502611E-01  -.4288281E-01  -.6336197E-01
  -.8523282E-01  -.1059030E+00  -.1249021E+00  -.1455756E+00  -.1701101E+00
  -.1961140E+00  -.2188172E+00  -.2351902E+00  -.2454609E+00  -.2522180E+00
  -.2577352E+00  -.2627487E+00  -.2671475E+00  -.2702942E+00  -.2716740E+00
  -.2709139E+00  -.2683939E+00  -.2654597E+00  -.2628316E+00  -.2603125E+00
  -.2572456E+00  -.2530400E+00  -.2490785E+00  -.2466825E+00  -.2442960E+00
  -.2387410E+00  -.2265338E+00  -.2065986E+00  -.1805776E+00  -.1513780E+00
  -.1229089E+00  -.9713700E-01  -.7373031E-01  -.5266077E-01  -.3436670E-01
  -.1924319E-01  -.7265051E-02   .2074621E-02   .9145241E-02   .1432095E-01
   .1851105E-01   .2380938E-01   .3132793E-01   .3960792E-01   .4765647E-01
   .5681327E-01   .6869711E-01   .8229514E-01   .9541370E-01   .1072460E+00
   .1180318E+00   .1289384E+00   .1406222E+00   .1514502E+00   .1592670E+00
   .1635991E+00   .1659350E+00   .1679584E+00   .1702093E+00   .1719042E+00
   .1717223E+00   .1697294E+00   .1673649E+00   .1666954E+00   .1691910E+00
   .1737369E+00   .1773416E+00   .1780547E+00   .1745707E+00   .1656002E+00
   .1513266E+00   .1320986E+00   .1085498E+00   .8241582E-01   .5536502E-01
   .3125000E-01   .1735457E-01   .1831625E-01   .3096194E-01   .4746967E-01
   .6184192E-01   .7275341E-01   .8202007E-01   .9262051E-01   .1064645E+00
   .1227823E+00   .1398293E+00   .1543433E+00   .1633142E+00   .1676740E+00
   .1692481E+00   .1688347E+00   .1670244E+00   .1641759E+00   .1603253E+00
   .1554576E+00   .1508221E+00   .1485898E+00   .1490741E+00   .1500917E+00
   .1493985E+00   .1462465E+00   .1415220E+00   .1361216E+00   .1298753E+00
   .1220918E+00   .1110940E+00   .9583641E-01   .7700003E-01   .5704517E-01
   .3910853E-01   .2429473E-01   .1185392E-01   .1033075E-02  -.7875037E-02
  -.1458912E-01  -.2010740E-01  -.2675010E-01  -.3519819E-01  -.4336928E-01
  -.4953136E-01  -.5308308E-01  -.5380045E-01  -.5095367E-01  -.4353211E-01
  -.3092062E-01  -.1367151E-01   .6856721E-02   .2938520E-01   .5214959E-01
   .7358888E-01   .9309103E-01   .1113795E+00   .1293049E+00   .1450802E+00
   .1561668E+00   .1628066E+00   .1657591E+00   .1646825E+00   .1594232E+00
   .1493117E+00   .1338942E+00   .1141250E+00   .9092436E-01   .6605894E-01
   .4233227E-01   .2116739E-01   .2933726E-02  -.1285593E-01  -.2731911E-01
  -.4179439E-01  -.5751733E-01  -.7424589E-01  -.9107592E-01  -.1078812E+00
  -.1244594E+00  -.1404186E+00  -.1567070E+00  -.1743764E+00  -.1933043E+00
  -.2121218E+00  -.2288307E+00  -.2435101E+00  -.2562875E+00  -.2653304E+00
  -.2701996E+00  -.2723985E+00  -.2733094E+00  -.2721556E+00  -.2682303E+00
  -.2623447E+00  -.2551460E+00  -.2471596E+00  -.2373600E+00  -.2248410E+00
  -.2111319E+00  -.1986193E+00  -.1881213E+00  -.1784043E+00  -.1679700E+00
  -.1556034E+00  -.1415755E+00  -.1272517E+00  -.1123125E+00  -.9554060E-01
  -.7646609E-01  -.5648387E-01  -.3773728E-01  -.2008919E-01  -.3007506E-02
   .1252521E-01   .2636125E-01   .3968525E-01   .5293481E-01   .6585422E-01
   .7858704E-01   .9163148E-01   .1052377E+00   .1190926E+00   .1330459E+00
   .1466393E+00   .1592598E+00   .1707809E+00   .1812675E+00   .1908931E+00
   .1992845E+00   .2055856E+00   .2100111E+00   .2135030E+00   .2157827E+00
   .2153168E+00   .2105366E+00   .2006860E+00   .1842514E+00   .1595655E+00
   .1263800E+00   .8616133E-01   .4268535E-01   .1085547E-02  -.3452847E-01
  -.6282998E-01  -.8347996E-01  -.9590372E-01  -.1005501E+00  -.1001451E+00
  -.9777113E-01  -.9531044E-01  -.9234338E-01  -.8659934E-01  -.7788988E-01
  -.6765578E-01  -.5658112E-01  -.4462215E-01  -.3157596E-01  -.1629732E-01
   .3414027E-02   .2913611E-01   .6037189E-01   .9482996E-01   .1294797E+00
   .1609598E+00   .1856710E+00   .2007990E+00   .2066485E+00   .2061497E+00
   .2020164E+00   .1973896E+00   .1956905E+00   .1977884E+00   .2019025E+00
   .2060022E+00   .2100346E+00   .2141974E+00   .2173029E+00   .2192119E+00
   .2210932E+00   .2224370E+00   .2213716E+00   .2157197E+00   .2035868E+00
   .1849263E+00   .1599825E+00   .1289458E+00   .9354251E-01   .5652129E-01
   .2066348E-01  -.1306262E-01  -.4629412E-01  -.8047771E-01  -.1135441E+00
  -.1413990E+00  -.1630526E+00  -.1798090E+00  -.1920028E+00  -.2001878E+00
  -.2048526E+00  -.2057089E+00  -.2033778E+00  -.1983724E+00  -.1902977E+00
  -.1799865E+00  -.1697406E+00  -.1613123E+00  -.1559714E+00  -.1547395E+00
  -.1566848E+00  -.1602417E+00  -.1647008E+00  -.1701693E+00  -.1762211E+00
  -.1807508E+00  -.1829899E+00  -.1840603E+00  -.1842554E+00  -.1828554E+00
  -.1786623E+00  -.1705717E+00  -.1591578E+00  -.1458984E+00  -.1323756E+00
  -.1195820E+00  -.1073055E+00  -.9601858E-01  -.8646674E-01  -.7812249E-01
  -.7005616E-01  -.6255913E-01  -.5629174E-01  -.5171193E-01  -.4957023E-01
  -.4935139E-01  -.4994350E-01  -.5147378E-01  -.5409307E-01  -.5641511E-01
  -.5565928E-01  -.5008341E-01  -.4075811E-01  -.2924190E-01  -.1573925E-01
  -.5949035E-03   .1498607E-01   .3013515E-01   .4513161E-01   .6030089E-01
   .7510490E-01   .8926121E-01   .1028570E+00   .1155292E+00   .1262352E+00
   .1338083E+00   .1379713E+00   .1389337E+00   .1361012E+00   .1286016E+00
   .1160797E+00   .1002274E+00   .8400205E-01   .6890286E-01   .5608897E-01
   .4645799E-01   .3943197E-01   .3435397E-01   .3155541E-01   .3122630E-01
   .3332213E-01   .3759021E-01   .4381408E-01   .5221231E-01   .6258233E-01
   .7471826E-01   .8859153E-01   .1032308E+00   .1169567E+00   .1288331E+00
   .1392770E+00   .1482866E+00   .1546679E+00   .1576446E+00   .1569127E+00
   .1524862E+00   .1444859E+00   .1311659E+00   .1098983E+00   .8057864E-01
   .4681004E-01   .1470760E-01  -.1164225E-01  -.3227731E-01  -.4857245E-01
  -.6236126E-01  -.7544829E-01  -.8840355E-01  -.1006296E+00  -.1104027E+00
  -.1170018E+00  -.1213688E+00  -.1241612E+00  -.1256221E+00  -.1260484E+00
  -.1256854E+00  -.1249032E+00  -.1240629E+00  -.1229631E+00  -.1214275E+00
  -.1194021E+00  -.1163900E+00  -.1113395E+00  -.1033143E+00  -.9180533E-01
  -.7666110E-01  -.5786901E-01  -.3584594E-01  -.1230734E-01   .1018996E-01
   .2931981E-01   .4418531E-01   .5528711E-01   .6341570E-01   .6904514E-01
   .7223639E-01   .7333172E-01   .7337316E-01   .7319692E-01   .7285263E-01
   .7175235E-01   .6930282E-01   .6561906E-01   .6111333E-01   .5561154E-01
   .4937326E-01   .4372599E-01   .3906968E-01   .3471396E-01   .3029188E-01
   .2542764E-01   .1913108E-01   .1117157E-01   .2603451E-02  -.6384461E-02
  -.1683527E-01  -.2893376E-01  -.4083916E-01  -.5079394E-01  -.5869349E-01
  -.6575906E-01  -.7350408E-01  -.8198358E-01  -.9132493E-01  -.1011926E+00
  -.1094878E+00  -.1154106E+00  -.1209183E+00  -.1284113E+00  -.1375755E+00
  -.1463831E+00  -.1540865E+00  -.1615358E+00  -.1696825E+00  -.1784178E+00
  -.1868297E+00  -.1940169E+00  -.2003103E+00  -.2067426E+00  -.2132696E+00
  -.2188000E+00  -.2228280E+00  -.2264291E+00  -.2299641E+00  -.2325627E+00
  -.2338905E+00  -.2339972E+00  -.2334464E+00  -.2320995E+00  -.2288687E+00
  -.2238329E+00  -.2184199E+00  -.2138330E+00  -.2091616E+00  -.2030991E+00
  -.1958958E+00  -.1883386E+00  -.1806656E+00  -.1723562E+00  -.1636853E+00
  -.1549731E+00  -.1461210E+00  -.1374202E+00  -.1284534E+00  -.1189288E+00
  -.1084874E+00  -.9665345E-01  -.8412669E-01  -.7116898E-01  -.5678398E-01
  -.3979598E-01  -.2061441E-01  -.1447952E-02   .1518878E-01   .2700953E-01
   .3305461E-01   .3348712E-01   .2886214E-01   .2029738E-01   .9835514E-02
   .1364466E-02  -.2394529E-02  -.2555938E-02  -.1375982E-02   .7370393E-03
   .4307758E-02   .1007384E-01   .1864482E-01   .2959204E-01   .4319549E-01
   .5958951E-01   .7730868E-01   .9448088E-01   .1103380E+00   .1258013E+00
   .1412928E+00   .1553096E+00   .1671136E+00   .1777263E+00   .1873451E+00
   .1949044E+00   .2002470E+00   .2043448E+00   .2077527E+00   .2102244E+00
   .2107961E+00   .2091727E+00   .2066567E+00   .2051634E+00   .2050445E+00
   .2046078E+00   .2029466E+00   .2002263E+00   .1960990E+00   .1905548E+00
   .1840097E+00   .1764905E+00   .1680624E+00   .1589203E+00   .1487411E+00
   .1364759E+00   .1227540E+00   .1103276E+00   .1011481E+00   .9575826E-01
   .9359202E-01   .9380400E-01   .9522098E-01   .9690253E-01   .9974251E-01
   .1052839E+00   .1138284E+00   .1238373E+00   .1331629E+00   .1400810E+00
   .1438568E+00   .1450121E+00   .1446527E+00   .1434944E+00   .1416286E+00
   .1394735E+00   .1380354E+00   .1374323E+00   .1371014E+00   .1375249E+00
   .1390559E+00   .1407792E+00   .1415940E+00   .1418890E+00   .1425259E+00
   .1430283E+00   .1425753E+00   .1406434E+00   .1367245E+00   .1310130E+00
   .1236528E+00   .1133212E+00   .9978106E-01   .8364782E-01   .6580316E-01
   .4851519E-01   .3301376E-01   .1854661E-01   .3991055E-02  -.1096285E-01
  -.2579969E-01  -.3972841E-01  -.5185674E-01  -.6122706E-01  -.6905170E-01
  -.7625478E-01  -.8127745E-01  -.8502551E-01  -.8911291E-01  -.9308835E-01
  -.9678449E-01  -.1002250E+00  -.1035631E+00  -.1073589E+00  -.1117611E+00
  -.1160967E+00  -.1193784E+00  -.1220483E+00  -.1254045E+00  -.1295068E+00
  -.1336961E+00  -.1370427E+00  -.1395337E+00  -.1419070E+00  -.1439960E+00
  -.1452166E+00  -.1458806E+00  -.1466958E+00  -.1470158E+00  -.1462679E+00
  -.1448760E+00  -.1431225E+00  -.1409467E+00  -.1380393E+00  -.1346068E+00
  -.1310840E+00  -.1275500E+00  -.1242184E+00  -.1211844E+00  -.1181287E+00
  -.1153568E+00  -.1134243E+00  -.1116949E+00  -.1088398E+00  -.1042087E+00
  -.9877655E-01  -.9353914E-01  -.8815064E-01  -.8103554E-01  -.7176957E-01
  -.6214390E-01  -.5376563E-01  -.4727007E-01  -.4154770E-01  -.3620437E-01
  -.3174940E-01  -.2755638E-01  -.2323003E-01  -.1755490E-01  -.1023961E-01
  -.2458494E-02   .4878449E-02   .1090331E-01   .1535399E-01   .1867038E-01
   .2162165E-01   .2509895E-01   .2992556E-01   .3534491E-01   .4119816E-01
   .4819876E-01   .5608070E-01   .6510750E-01   .7492868E-01   .8497756E-01
   .9565291E-01   .1068787E+00   .1184751E+00   .1300410E+00   .1413551E+00
   .1532048E+00   .1650747E+00   .1760149E+00   .1864920E+00   .1964535E+00
   .2054624E+00   .2130355E+00   .2188205E+00   .2238173E+00   .2288215E+00
   .2332265E+00   .2363421E+00   .2389685E+00   .2417506E+00   .2439450E+00
   .2452673E+00   .2452231E+00   .2430902E+00   .2383811E+00   .2308630E+00
   .2208711E+00   .2073751E+00   .1898553E+00   .1695949E+00   .1470711E+00
   .1225921E+00   .9785449E-01   .7353121E-01   .4799700E-01   .2048357E-01
  -.9139614E-02  -.4015922E-01  -.6942660E-01  -.9387287E-01  -.1128227E+00
  -.1272396E+00  -.1382149E+00  -.1470437E+00  -.1538264E+00  -.1577120E+00
  -.1584082E+00  -.1546227E+00  -.1447119E+00  -.1286859E+00  -.1084271E+00
  -.8536094E-01  -.6031536E-01  -.3507206E-01  -.1377667E-01   .1433741E-02
   .1403209E-01   .2436890E-01   .3111174E-01   .3461703E-01   .3439568E-01
   .2971193E-01   .2023142E-01   .6926937E-02  -.9372760E-02  -.2681441E-01
  -.4272719E-01  -.5561818E-01  -.6550668E-01  -.7370015E-01  -.8089898E-01
  -.8660598E-01  -.9008522E-01  -.9225949E-01  -.9496050E-01  -.9815293E-01
  -.1003052E+00  -.1001366E+00  -.9783686E-01  -.9435060E-01  -.9101799E-01
  -.8885391E-01  -.8733839E-01  -.8617662E-01  -.8538840E-01  -.8553224E-01
  -.8718019E-01  -.8990311E-01  -.9346749E-01  -.9707769E-01  -.1002715E+00
  -.1023944E+00  -.1020961E+00  -.9843562E-01  -.9112179E-01  -.8181899E-01
  -.7183658E-01  -.6078742E-01  -.4853180E-01  -.3518509E-01  -.2078224E-01
  -.6776968E-02   .5443003E-02   .1491883E-01   .2047860E-01   .2303485E-01
   .2406541E-01   .2442906E-01   .2402493E-01   .2145284E-01   .1634802E-01
   .1053835E-01   .5857988E-02   .3132376E-02   .2030585E-02   .1744451E-02
   .2458878E-02   .4685602E-02   .9261137E-02   .1689554E-01   .2729734E-01
   .3918516E-01   .5091346E-01   .6183014E-01   .7145401E-01   .7853916E-01
   .8277099E-01   .8504546E-01   .8601764E-01   .8532273E-01   .8309993E-01
   .8033628E-01   .7697028E-01   .7251657E-01   .6673390E-01   .6102732E-01
   .5710434E-01   .5520537E-01   .5403962E-01   .5093072E-01   .4619789E-01
   .4152451E-01   .3636401E-01   .2864167E-01   .1716643E-01   .3293990E-02
  -.1041582E-01  -.2230329E-01  -.3119525E-01  -.3603225E-01  -.3808862E-01
  -.3916405E-01  -.3962727E-01  -.3899809E-01  -.3684265E-01  -.3293800E-01
  -.2802292E-01  -.2319027E-01  -.1805139E-01  -.1230982E-01  -.5838205E-02
   .1235618E-02   .8084090E-02   .1434091E-01   .1936453E-01   .2294622E-01
   .2613553E-01   .3067804E-01   .3770664E-01   .4442199E-01   .4798360E-01
   .5085501E-01   .5518207E-01   .5926946E-01   .6115785E-01   .6066007E-01
   .5868766E-01   .5521285E-01   .4895732E-01   .3735889E-01   .1931184E-01
  -.2462139E-02  -.2363154E-01  -.3978746E-01  -.5046790E-01  -.5941039E-01
  -.6929506E-01  -.7988666E-01  -.8947068E-01  -.9701115E-01  -.1023950E+00
  -.1058736E+00  -.1073885E+00  -.1071370E+00  -.1059238E+00  -.1033271E+00
  -.9882917E-01  -.9261249E-01  -.8436265E-01  -.7515691E-01  -.6779874E-01
  -.6366292E-01  -.6225769E-01  -.6266806E-01  -.6423448E-01  -.6708576E-01
  -.7074021E-01  -.7384864E-01  -.7615181E-01  -.7834531E-01  -.8100076E-01
  -.8341312E-01  -.8450170E-01  -.8419651E-01  -.8229288E-01  -.7854970E-01
  -.7297206E-01  -.6544155E-01  -.5635563E-01  -.4713422E-01  -.3925822E-01
  -.3313563E-01  -.2836526E-01  -.2407103E-01  -.1955539E-01  -.1508224E-01
  -.1084601E-01  -.6534503E-02  -.2189397E-02   .2110381E-02   .6151488E-02
   .9239286E-02   .1134204E-01   .1255011E-01   .1270762E-01   .1162050E-01
   .8880228E-02   .4860168E-02   .6894179E-03  -.2501985E-02  -.5267597E-02
  -.8434512E-02  -.1127609E-01  -.1354538E-01  -.1514276E-01  -.1561095E-01
  -.1535379E-01  -.1537594E-01  -.1674970E-01  -.1987411E-01  -.2349233E-01
  -.2566129E-01  -.2580365E-01  -.2480791E-01  -.2391283E-01  -.2389979E-01
  -.2445112E-01  -.2504111E-01  -.2559637E-01  -.2521376E-01  -.2358473E-01
  -.2157129E-01  -.1946095E-01  -.1682497E-01  -.1282485E-01  -.6666150E-02
   .2101576E-02   .1240724E-01   .2281588E-01   .3275706E-01   .4193942E-01
   .5137327E-01   .6184086E-01   .7177235E-01   .7905813E-01   .8367878E-01
   .8670428E-01   .8844479E-01   .8964338E-01   .9047061E-01   .9005685E-01
   .8848022E-01   .8615219E-01   .8303314E-01   .7908367E-01   .7462348E-01
   .7058476E-01   .6810628E-01   .6666711E-01   .6484023E-01   .6256088E-01
   .5988770E-01   .5661314E-01   .5315899E-01   .4975866E-01   .4564054E-01
   .4027371E-01   .3401864E-01   .2679715E-01   .1803954E-01   .7827109E-02
  -.2912934E-02  -.1336943E-01  -.2312267E-01  -.3161834E-01  -.3758581E-01
  -.4014342E-01  -.4023821E-01  -.3938779E-01  -.3769091E-01  -.3448916E-01
  -.2916829E-01  -.2159872E-01  -.1317157E-01  -.5619949E-02   .1031081E-02
   .7663949E-02   .1375964E-01   .1796046E-01   .1991893E-01   .2108206E-01
   .2209587E-01   .2184393E-01   .2005646E-01   .1739319E-01   .1445131E-01
   .1167334E-01   .9674171E-02   .8596505E-02   .8461346E-02   .9495130E-02
   .1109546E-01   .1264603E-01   .1440940E-01   .1666734E-01   .1931900E-01
   .2164960E-01   .2314170E-01   .2421215E-01   .2481709E-01   .2496359E-01
   .2477484E-01   .2395311E-01   .2249811E-01   .2045581E-01   .1749401E-01
   .1379033E-01   .1009660E-01   .6869006E-02   .4214120E-02   .1396136E-02
  -.1576265E-02  -.3709013E-02  -.4464858E-02  -.3576722E-02  -.1396868E-02
   .1242514E-02   .3907857E-02   .7228923E-02   .1221260E-01   .1886398E-01
   .2661092E-01   .3455803E-01   .4141524E-01   .4702814E-01   .5227454E-01
   .5682187E-01   .5899613E-01   .5866546E-01   .5675348E-01   .5338763E-01
   .4911451E-01   .4433015E-01   .3902331E-01   .3341826E-01   .2790221E-01
   .2283796E-01   .1754775E-01   .1164228E-01   .4994352E-02  -.2245256E-02
  -.8391185E-02  -.1297791E-01  -.1715888E-01  -.2134049E-01  -.2469019E-01
  -.2659864E-01  -.2726904E-01  -.2664482E-01  -.2447674E-01  -.2105235E-01
  -.1762035E-01  -.1498614E-01  -.1216204E-01  -.8328055E-02  -.3917807E-02
   .7126109E-03   .6307697E-02   .1396513E-01   .2214591E-01   .2842165E-01
   .3334651E-01   .3813096E-01   .4248031E-01   .4572369E-01   .4757953E-01
   .4831199E-01   .4802050E-01   .4653076E-01   .4456296E-01   .4208069E-01
   .3764713E-01   .3154309E-01   .2584275E-01   .2186086E-01   .1939420E-01
   .1785141E-01   .1729226E-01   .1804689E-01   .1983849E-01   .2219905E-01
   .2503666E-01   .2803743E-01   .3137742E-01   .3550306E-01   .3944120E-01
   .4275565E-01   .4616029E-01   .4917266E-01   .5107939E-01   .5231899E-01
   .5285986E-01   .5201237E-01   .5021314E-01   .4852761E-01   .4675750E-01
   .4413511E-01   .4108272E-01   .3847643E-01   .3633884E-01   .3455629E-01
   .3276101E-01   .2975661E-01   .2504338E-01   .1953234E-01   .1446461E-01
   .9825155E-02   .5010104E-02   .2691505E-03  -.4242329E-02  -.9021618E-02
  -.1406799E-01  -.1920082E-01  -.2466153E-01  -.3023240E-01  -.3571026E-01
  -.4141359E-01  -.4816891E-01  -.5612583E-01  -.6397424E-01  -.7076402E-01
  -.7641269E-01  -.8077037E-01  -.8344393E-01  -.8435207E-01  -.8420666E-01
  -.8363324E-01  -.8251121E-01  -.8060839E-01  -.7748726E-01  -.7285163E-01
  -.6720086E-01  -.6151766E-01  -.5647158E-01  -.5236464E-01  -.4918605E-01
  -.4663264E-01  -.4424481E-01  -.4152783E-01  -.3881266E-01  -.3676887E-01
  -.3535517E-01  -.3410693E-01  -.3316531E-01  -.3303580E-01  -.3351488E-01
  -.3408740E-01  -.3465475E-01  -.3521930E-01  -.3546893E-01  -.3533313E-01
  -.3526390E-01  -.3521699E-01  -.3466857E-01  -.3359935E-01  -.3274765E-01
  -.3236115E-01  -.3229418E-01  -.3315593E-01  -.3500348E-01  -.3744185E-01
  -.4033420E-01  -.4352314E-01  -.4643196E-01  -.4815714E-01  -.4857998E-01
  -.4836167E-01  -.4798958E-01  -.4750219E-01  -.4710950E-01  -.4736674E-01
  -.4833594E-01  -.4852487E-01  -.4691995E-01  -.4498716E-01  -.4402385E-01
  -.4304505E-01  -.4040216E-01  -.3621968E-01  -.3178421E-01  -.2785888E-01
  -.2403251E-01  -.1966892E-01  -.1493571E-01  -.1002987E-01  -.5224160E-02
  -.5488465E-03   .4273572E-02   .9085137E-02   .1289760E-01   .1509205E-01
   .1607349E-01   .1648501E-01   .1673143E-01   .1615157E-01   .1421046E-01
   .1091875E-01   .6402891E-02   .1098675E-02  -.4681636E-02  -.1001312E-01
  -.1399053E-01  -.1640121E-01  -.1738558E-01  -.1760327E-01  -.1709895E-01
  -.1540827E-01  -.1264324E-01  -.9203230E-02  -.5284207E-02  -.8949993E-03
   .3297503E-02   .6081245E-02   .7233566E-02   .7545637E-02   .7483927E-02
   .6766739E-02   .4533767E-02   .3670102E-03  -.5112952E-02  -.1176122E-01
  -.1954274E-01  -.2772549E-01  -.3623385E-01  -.4490166E-01  -.5219526E-01
  -.5693545E-01  -.5993421E-01  -.6293478E-01  -.6579460E-01  -.6650531E-01
  -.6418289E-01  -.5953833E-01  -.5423006E-01  -.4938009E-01  -.4431110E-01
  -.3780600E-01  -.3023796E-01  -.2356741E-01  -.1841604E-01  -.1379260E-01
  -.9097124E-02  -.4533679E-02  -.5322967E-03   .2873169E-02   .6132050E-02
   .9617184E-02   .1373031E-01   .1862761E-01   .2436889E-01   .3111352E-01
   .3772196E-01   .4346844E-01   .4885599E-01   .5279015E-01   .5394827E-01
   .5341304E-01   .5255577E-01   .5126298E-01   .4935748E-01   .4691343E-01
   .4422297E-01   .4215331E-01   .4106115E-01   .4056844E-01   .4021061E-01
   .3986528E-01   .3977550E-01   .4048416E-01   .4183750E-01   .4261425E-01
   .4292322E-01   .4335047E-01   .4367215E-01   .4364607E-01   .4289143E-01
   .4133777E-01   .3919475E-01   .3674654E-01   .3382710E-01   .3030251E-01
   .2644655E-01   .2234044E-01   .1801311E-01   .1395241E-01   .1052181E-01
   .6885608E-02   .2657057E-02  -.1433891E-02  -.5077921E-02  -.8555203E-02
  -.1246960E-01  -.1738025E-01  -.2239981E-01  -.2559183E-01  -.2674752E-01
  -.2740362E-01  -.2825279E-01  -.2881158E-01  -.2893433E-01  -.2853783E-01
  -.2728773E-01  -.2550361E-01  -.2337619E-01  -.2088774E-01  -.1847848E-01
  -.1596221E-01  -.1246374E-01  -.7754819E-02  -.2361600E-02   .3306756E-02
   .9197894E-02   .1530827E-01   .2167446E-01   .2855390E-01   .3610297E-01
   .4404795E-01   .5181783E-01   .5894515E-01   .6506372E-01   .6999771E-01
   .7360960E-01   .7576655E-01   .7702486E-01   .7763309E-01   .7711506E-01
   .7523907E-01   .7245832E-01   .6918057E-01   .6498069E-01   .6019631E-01
   .5563302E-01   .5115396E-01   .4623687E-01   .4051008E-01   .3405176E-01
   .2699241E-01   .1949476E-01   .1177324E-01   .4092111E-02  -.3256977E-02
  -.1107141E-01  -.1996308E-01  -.2861319E-01  -.3578269E-01  -.4185924E-01
  -.4775612E-01  -.5359410E-01  -.5834983E-01  -.6110848E-01  -.6211375E-01
  -.6215722E-01  -.6162476E-01  -.6049539E-01  -.5847778E-01  -.5529946E-01
  -.5189604E-01  -.4846886E-01  -.4342384E-01  -.3635626E-01  -.2845044E-01
  -.2107455E-01  -.1479265E-01  -.9256904E-02  -.4619516E-02  -.1319368E-02
   .7906094E-03   .2293469E-02   .3561191E-02   .4213154E-02   .4101880E-02
   .3802255E-02   .3457498E-02   .2417084E-02   .9084877E-03  -.3757396E-03
  -.1319581E-02  -.1616103E-02  -.1369506E-02  -.8099990E-03  -.6456995E-04
   .4547001E-03   .1265243E-02   .3056875E-02   .5151830E-02   .6356057E-02
   .6497505E-02   .6824743E-02   .7917140E-02   .8725252E-02   .8158517E-02
   .6428856E-02   .5059095E-02   .4790722E-02   .4531970E-02   .3512856E-02
   .2549162E-02   .1925955E-02   .1013944E-02   .2550450E-03   .5813004E-03
   .1812155E-02   .3152887E-02   .4590497E-02   .6503951E-02   .8894998E-02
   .1156764E-01   .1412963E-01   .1626747E-01   .1805317E-01   .2013918E-01
   .2273852E-01   .2518935E-01   .2730618E-01   .2903801E-01   .3040016E-01
   .3200096E-01   .3364490E-01   .3457882E-01   .3462456E-01   .3387205E-01
   .3257423E-01   .3058652E-01   .2666939E-01   .2021297E-01   .1236098E-01
   .4076458E-02  -.4083442E-02  -.1184168E-01  -.1989091E-01  -.2843451E-01
  -.3605734E-01  -.4154885E-01  -.4532015E-01  -.4828582E-01  -.5096364E-01
  -.5290745E-01  -.5310911E-01  -.5135745E-01  -.4815643E-01  -.4383013E-01
  -.3834301E-01  -.3205801E-01  -.2597170E-01  -.2103774E-01  -.1724465E-01
  -.1410603E-01  -.1224187E-01  -.1240433E-01  -.1417075E-01  -.1704988E-01
  -.2098746E-01  -.2528101E-01  -.2894502E-01  -.3176620E-01  -.3419156E-01
  -.3654957E-01  -.3842506E-01  -.3935717E-01  -.3933772E-01  -.3866384E-01
  -.3794347E-01  -.3703770E-01  -.3492970E-01  -.3164647E-01  -.2800540E-01
  -.2426392E-01  -.2057321E-01  -.1754451E-01  -.1592662E-01  -.1580148E-01
  -.1650723E-01  -.1773809E-01  -.1933069E-01  -.2059612E-01  -.2154407E-01
  -.2271162E-01  -.2386152E-01  -.2465309E-01  -.2528009E-01  -.2598027E-01
  -.2679890E-01  -.2747486E-01  -.2780470E-01  -.2818280E-01  -.2876913E-01
  -.2867433E-01  -.2697707E-01  -.2379162E-01  -.1945237E-01  -.1387138E-01
  -.7161897E-02   .2706263E-03   .7839832E-02   .1518418E-01   .2265006E-01
   .3039453E-01   .3757445E-01   .4325985E-01   .4724438E-01   .4999282E-01
   .5257065E-01   .5519567E-01   .5692977E-01   .5747466E-01   .5724542E-01
   .5664191E-01   .5588294E-01   .5473795E-01   .5262064E-01   .4949439E-01
   .4592367E-01   .4220060E-01   .3807179E-01   .3347093E-01   .2928221E-01
   .2640195E-01   .2429824E-01   .2195277E-01   .1983474E-01   .1854949E-01
   .1773988E-01   .1755795E-01   .1855862E-01   .2013510E-01   .2068990E-01
   .1979424E-01   .1850016E-01   .1792558E-01   .1856468E-01   .2052999E-01
   .2315426E-01   .2521354E-01   .2718932E-01   .3019131E-01   .3385883E-01
   .3742416E-01   .4027868E-01   .4213832E-01   .4365945E-01   .4549204E-01
   .4694804E-01   .4677611E-01   .4459113E-01   .4099280E-01   .3698731E-01
   .3294074E-01   .2841810E-01   .2365628E-01   .1952255E-01   .1638479E-01
   .1402797E-01   .1216283E-01   .1089755E-01   .1025005E-01   .1016954E-01
   .1090965E-01   .1211488E-01   .1346021E-01   .1562339E-01   .1852763E-01
   .2123853E-01   .2365895E-01   .2603853E-01   .2814338E-01   .2966978E-01
   .3058937E-01   .3128551E-01   .3250470E-01   .3427943E-01   .3578757E-01
   .3651815E-01   .3689534E-01   .3741649E-01   .3733925E-01   .3554202E-01
   .3206628E-01   .2760895E-01   .2240471E-01   .1654937E-01   .1086023E-01
   .6247262E-02   .2530423E-02  -.1006732E-02  -.4592502E-02  -.7937432E-02
  -.1078742E-01  -.1318728E-01  -.1517707E-01  -.1696307E-01  -.1927298E-01
  -.2246272E-01  -.2600282E-01  -.2912202E-01  -.3203106E-01  -.3603800E-01
  -.4150156E-01  -.4722398E-01  -.5195835E-01  -.5542709E-01  -.5845278E-01
  -.6190069E-01  -.6503175E-01  -.6679383E-01  -.6776944E-01  -.6894525E-01
  -.7013650E-01  -.7048480E-01  -.7001156E-01  -.6962603E-01  -.6968118E-01
  -.6980331E-01  -.6966885E-01  -.6892521E-01  -.6736285E-01  -.6596337E-01
  -.6565987E-01  -.6541750E-01  -.6421144E-01  -.6252140E-01  -.6110519E-01
  -.6026551E-01  -.5936222E-01  -.5728014E-01  -.5408320E-01  -.5045870E-01
  -.4658780E-01  -.4280304E-01  -.3913808E-01  -.3472103E-01  -.2898259E-01
  -.2231400E-01  -.1565047E-01  -.9654846E-02  -.4204393E-02   .7132747E-03
   .5067633E-02   .8894968E-02   .1174856E-01   .1337196E-01   .1447453E-01
   .1574546E-01   .1672564E-01   .1686444E-01   .1637594E-01   .1534578E-01
   .1384047E-01   .1235583E-01   .1140761E-01   .1127338E-01   .1143475E-01
   .1150553E-01   .1209826E-01   .1383614E-01   .1590594E-01   .1681172E-01
   .1660285E-01   .1659281E-01   .1770400E-01   .1924366E-01   .2014137E-01
   .2094357E-01   .2249461E-01   .2436097E-01   .2554040E-01   .2565982E-01
   .2574533E-01   .2674422E-01   .2782805E-01   .2818510E-01   .2819450E-01
   .2805192E-01   .2720861E-01   .2556050E-01   .2373295E-01   .2190835E-01
   .1984610E-01   .1772063E-01   .1627179E-01   .1603133E-01   .1672317E-01
   .1812841E-01   .2018570E-01   .2265311E-01   .2548049E-01   .2831323E-01
   .3064660E-01   .3275672E-01   .3501994E-01   .3689685E-01   .3799300E-01
   .3859967E-01   .3829736E-01   .3652814E-01   .3376114E-01   .3031278E-01
   .2579951E-01   .2005346E-01   .1406352E-01   .9068001E-02   .5029691E-02
   .1235653E-02  -.2681531E-02  -.6367820E-02  -.9175840E-02  -.1086620E-01
  -.1180895E-01  -.1210473E-01  -.1132337E-01  -.9888598E-02  -.8545725E-02
  -.6875280E-02  -.4330323E-02  -.1452810E-02   .1480454E-02   .4742138E-02
   .8018546E-02   .1100579E-01   .1354663E-01   .1537614E-01   .1696937E-01
   .1893605E-01   .2052098E-01   .2071013E-01   .1991356E-01   .1941937E-01
   .1980070E-01   .1986214E-01   .1861018E-01   .1716128E-01   .1702295E-01
   .1841949E-01   .2011570E-01   .2108110E-01   .2229944E-01   .2483584E-01
   .2784115E-01   .2992162E-01   .3092544E-01   .3177422E-01   .3265880E-01
   .3258071E-01   .3110735E-01   .2864139E-01   .2533633E-01   .2113669E-01
   .1589368E-01   .9483668E-02   .3009527E-02  -.2121466E-02  -.6663112E-02
  -.1211830E-01  -.1862498E-01  -.2571435E-01  -.3334532E-01  -.4145880E-01
  -.4923265E-01  -.5535115E-01  -.5907797E-01  -.6138431E-01  -.6386009E-01
  -.6603690E-01  -.6646276E-01  -.6545397E-01  -.6404640E-01  -.6219996E-01
  -.5878870E-01  -.5302606E-01  -.4590499E-01  -.3934180E-01  -.3404323E-01
  -.2935144E-01  -.2509164E-01  -.2160408E-01  -.1880696E-01  -.1673192E-01
  -.1551298E-01  -.1457353E-01  -.1339611E-01  -.1208124E-01  -.1058700E-01
  -.8976836E-02  -.7280727E-02  -.5135888E-02  -.2506596E-02   .4384463E-03
   .3762754E-02   .6794607E-02   .8314239E-02   .8149964E-02   .7129734E-02
   .5916757E-02   .4405721E-02   .2513663E-02   .5370828E-03  -.1520781E-02
  -.3596266E-02  -.5024129E-02  -.5591371E-02  -.6163676E-02  -.7019793E-02
  -.7689716E-02  -.8138413E-02  -.8378094E-02  -.8576465E-02  -.8845115E-02
  -.8710588E-02  -.7708626E-02  -.6518579E-02  -.6232422E-02  -.6236706E-02
  -.5366117E-02  -.3505562E-02  -.1253586E-02   .9237992E-03   .3046556E-02
   .5398919E-02   .8606233E-02   .1296142E-01   .1832008E-01   .2446894E-01
   .3096675E-01   .3733577E-01   .4337014E-01   .4907943E-01   .5438097E-01
   .5895300E-01   .6210281E-01   .6365003E-01   .6449253E-01   .6555148E-01
   .6693609E-01   .6759154E-01   .6664967E-01   .6452413E-01   .6148321E-01
   .5740279E-01   .5169299E-01   .4321115E-01   .3212392E-01   .2031704E-01
   .9456747E-02  -.2225874E-03  -.9410932E-02  -.1827451E-01  -.2621073E-01
  -.3296021E-01  -.3894638E-01  -.4478524E-01  -.5040232E-01  -.5572198E-01
  -.6118174E-01  -.6680669E-01  -.7196953E-01  -.7643770E-01  -.8090620E-01
  -.8534961E-01  -.8892855E-01  -.9103423E-01  -.9160410E-01  -.9137418E-01
  -.9042913E-01  -.8764829E-01  -.8305674E-01  -.7797902E-01  -.7310345E-01
  -.6796399E-01  -.6175136E-01  -.5489864E-01  -.4908213E-01  -.4513496E-01
  -.4178744E-01  -.3780978E-01  -.3366848E-01  -.2965665E-01  -.2559514E-01
  -.2147889E-01  -.1736935E-01  -.1333041E-01  -.8381789E-02  -.2213200E-02
   .3686907E-02   .8299570E-02   .1175802E-01   .1467529E-01   .1764534E-01
   .2023596E-01   .2127925E-01   .2109537E-01   .2099208E-01   .2094057E-01
   .2024464E-01   .1898593E-01   .1719865E-01   .1464995E-01   .1170779E-01
   .8606848E-02   .5415966E-02   .2485223E-02   .1714236E-03  -.1047287E-02
  -.1378388E-02  -.1583500E-02  -.2048425E-02  -.2545881E-02  -.2757860E-02
  -.2654533E-02  -.2424161E-02  -.2457823E-02  -.3240438E-02  -.4596602E-02
  -.5312868E-02  -.5281834E-02  -.5622014E-02  -.6806283E-02  -.8137578E-02
  -.8483254E-02  -.7932046E-02  -.7660029E-02  -.7568897E-02  -.6645252E-02
  -.4802460E-02  -.2164049E-02   .1452559E-02   .5993393E-02   .1078322E-01
   .1522673E-01   .1944662E-01   .2364397E-01   .2820787E-01   .3350135E-01
   .3863947E-01   .4233231E-01   .4473508E-01   .4692798E-01   .4906656E-01
   .5059044E-01   .5113670E-01   .5070742E-01   .4958088E-01   .4810436E-01
   .4625643E-01   .4347794E-01   .3995849E-01   .3666219E-01   .3360570E-01
   .3044478E-01   .2807916E-01   .2683647E-01   .2539904E-01   .2287019E-01
   .1965718E-01   .1693534E-01   .1556671E-01   .1429041E-01   .1150022E-01
   .7917926E-02   .4748630E-02   .2319450E-02   .6866734E-04  -.2746263E-02
  -.5307021E-02  -.6563255E-02  -.7278618E-02  -.8217615E-02  -.8802902E-02
  -.8372359E-02  -.6948997E-02  -.5192286E-02  -.3715137E-02  -.2566852E-02
  -.1802707E-02  -.1465664E-02  -.1473998E-02  -.2431395E-02  -.4710942E-02
  -.7206484E-02  -.9385641E-02  -.1212577E-01  -.1533396E-01  -.1794062E-01
  -.1964998E-01  -.2071113E-01  -.2128905E-01  -.2131019E-01  -.2052099E-01
  -.1915041E-01  -.1748685E-01  -.1551891E-01  -.1304770E-01  -.9819777E-02
  -.6228715E-02  -.2961762E-02  -.2890056E-03   .2253519E-02   .4760063E-02
   .6525962E-02   .7737262E-02   .8620967E-02   .8815224E-02   .8281826E-02
   .6998392E-02   .5021290E-02   .2396295E-02  -.7255469E-03  -.4113173E-02
  -.7984572E-02  -.1181895E-01  -.1460782E-01  -.1668230E-01  -.1894440E-01
  -.2130784E-01  -.2341022E-01  -.2544981E-01  -.2759958E-01  -.3002756E-01
  -.3310955E-01  -.3662046E-01  -.3967774E-01  -.4222357E-01  -.4496804E-01
  -.4799367E-01  -.5089369E-01  -.5357259E-01  -.5601562E-01  -.5786600E-01
  -.5842250E-01  -.5779677E-01  -.5703793E-01  -.5645675E-01  -.5493910E-01
  -.5162256E-01  -.4774497E-01  -.4486555E-01  -.4296697E-01  -.4141322E-01
  -.4013837E-01  -.3910080E-01  -.3856474E-01  -.3894335E-01  -.3996201E-01
  -.4157920E-01  -.4340278E-01  -.4521466E-01  -.4767096E-01  -.5048289E-01
  -.5250697E-01  -.5368966E-01  -.5487224E-01  -.5592813E-01  -.5583364E-01
  -.5387104E-01  -.4943962E-01  -.4207291E-01  -.3296140E-01  -.2409518E-01
  -.1627764E-01  -.8656064E-02  -.1532505E-03   .8781682E-02   .1743764E-01
   .2570605E-01   .3358814E-01   .4059000E-01   .4616818E-01   .5093731E-01
   .5591691E-01   .6118402E-01   .6574294E-01   .6864382E-01   .7019248E-01
   .7143958E-01   .7275398E-01   .7362183E-01   .7337205E-01   .7190643E-01
   .7020819E-01   .6911413E-01   .6821755E-01   .6740694E-01   .6705738E-01
   .6694845E-01   .6687720E-01   .6677137E-01   .6666575E-01   .6703806E-01
   .6750077E-01   .6679498E-01   .6490773E-01   .6271502E-01   .6032943E-01
   .5748636E-01   .5379358E-01   .4886837E-01   .4253900E-01   .3436838E-01
   .2452419E-01   .1480175E-01   .7042242E-02   .7310571E-03  -.5758017E-02
  -.1256942E-01  -.1891184E-01  -.2410731E-01  -.2730510E-01  -.2832917E-01
  -.2827899E-01  -.2800249E-01  -.2773581E-01  -.2743085E-01  -.2695578E-01
  -.2671510E-01  -.2674785E-01  -.2638463E-01  -.2510347E-01  -.2339594E-01
  -.2230401E-01  -.2136898E-01  -.1910147E-01  -.1528653E-01  -.1082960E-01
  -.5893729E-02  -.4959875E-03   .4583101E-02   .8653157E-02   .1147367E-01
   .1402278E-01   .1697631E-01   .1953835E-01   .2158843E-01   .2367767E-01
   .2571449E-01   .2759324E-01   .2965645E-01   .3195915E-01   .3452917E-01
   .3747297E-01   .4055469E-01   .4331430E-01   .4566115E-01   .4775415E-01
   .4928389E-01   .5007972E-01   .5018229E-01   .4946733E-01   .4795631E-01
   .4569218E-01   .4281565E-01   .3953564E-01   .3592190E-01   .3205743E-01
   .2803146E-01   .2417861E-01   .2081026E-01   .1710773E-01   .1207945E-01
   .6566882E-02   .1947464E-02  -.2023929E-02  -.6137709E-02  -.1023384E-01
  -.1415677E-01  -.1815624E-01  -.2203267E-01  -.2518593E-01  -.2749453E-01
  -.2980364E-01  -.3213245E-01  -.3309019E-01  -.3229164E-01  -.3031008E-01
  -.2751477E-01  -.2400433E-01  -.1913310E-01  -.1263389E-01  -.5399851E-02
   .2007281E-02   .9722146E-02   .1713693E-01   .2319265E-01   .2802816E-01
   .3241032E-01   .3684065E-01   .4111467E-01   .4474729E-01   .4806212E-01
   .5154045E-01   .5533466E-01   .5905936E-01   .6233157E-01   .6502108E-01
   .6714769E-01   .6924791E-01   .7154592E-01   .7361122E-01   .7484147E-01
   .7529071E-01   .7547549E-01   .7536357E-01   .7461182E-01   .7277188E-01
   .6917052E-01   .6356874E-01   .5618717E-01   .4741042E-01   .3747611E-01
   .2627111E-01   .1428509E-01   .2898565E-02  -.6835050E-02  -.1480073E-01
  -.2105401E-01  -.2585371E-01  -.2988087E-01  -.3286675E-01  -.3423940E-01
  -.3442911E-01  -.3367212E-01  -.3194856E-01  -.2934516E-01  -.2565894E-01
  -.2083999E-01  -.1501443E-01  -.8234236E-02  -.6946945E-03   .7230616E-02
   .1483379E-01   .2149417E-01   .2686520E-01   .3075779E-01   .3366307E-01
   .3602302E-01   .3697374E-01   .3560606E-01   .3268700E-01   .2924275E-01
   .2484067E-01   .1826792E-01   .9458553E-02   .2447411E-03  -.7385201E-02
  -.1322732E-01  -.1850749E-01  -.2404028E-01  -.2968547E-01  -.3508893E-01
  -.3992649E-01  -.4381851E-01  -.4637340E-01  -.4802038E-01  -.5007897E-01
  -.5266784E-01  -.5475331E-01  -.5609894E-01  -.5739558E-01  -.5923814E-01
  -.6133807E-01  -.6309839E-01  -.6439869E-01  -.6529662E-01  -.6575074E-01
  -.6622561E-01  -.6736390E-01  -.6869694E-01  -.6929558E-01  -.6905817E-01
  -.6881780E-01  -.6942568E-01  -.7038406E-01  -.7014770E-01  -.6823593E-01
  -.6596164E-01  -.6424918E-01  -.6234898E-01  -.5942217E-01  -.5565526E-01
  -.5176948E-01  -.4803085E-01  -.4421730E-01  -.4018477E-01  -.3594226E-01
  -.3213871E-01  -.2930029E-01  -.2657471E-01  -.2323772E-01  -.2005707E-01
  -.1777751E-01  -.1592856E-01  -.1405483E-01  -.1238930E-01  -.1084532E-01
  -.8980669E-02  -.6494351E-02  -.3437071E-02  -.2958669E-03   .2647040E-02
   .5473528E-02   .8332332E-02   .1140926E-01   .1466327E-01   .1762450E-01
   .1989499E-01   .2144884E-01   .2247453E-01   .2338189E-01   .2434693E-01
   .2496735E-01   .2488864E-01   .2453637E-01   .2397221E-01   .2273263E-01
   .2107644E-01   .1930975E-01   .1733291E-01   .1506194E-01   .1233412E-01
   .9079152E-02   .5710074E-02   .2478022E-02  -.1070875E-02  -.5081994E-02
  -.9261828E-02  -.1384086E-01  -.1858818E-01  -.2273428E-01  -.2593732E-01
  -.2826073E-01  -.3066480E-01  -.3403363E-01  -.3759444E-01  -.3985694E-01
  -.4036598E-01  -.3972955E-01  -.3898716E-01  -.3875883E-01  -.3824584E-01
  -.3624244E-01  -.3272745E-01  -.2846764E-01  -.2379770E-01  -.1864386E-01
  -.1295035E-01  -.7243874E-02  -.2387014E-02   .1940133E-02   .6316997E-02
   .1073652E-01   .1508066E-01   .1875078E-01   .2161383E-01   .2413683E-01
   .2639256E-01   .2827930E-01   .3010740E-01   .3214313E-01   .3368545E-01
   .3402394E-01   .3382064E-01   .3446106E-01   .3583883E-01   .3649930E-01
   .3628060E-01   .3632834E-01   .3698100E-01   .3714009E-01   .3640761E-01
   .3567309E-01   .3519232E-01   .3448300E-01   .3316443E-01   .3144657E-01
   .2972459E-01   .2799181E-01   .2611817E-01   .2389386E-01   .2118520E-01
   .1866504E-01   .1690154E-01   .1518150E-01   .1296689E-01   .1091728E-01
   .9683397E-02   .8885999E-02   .7935342E-02   .7334017E-02   .7387809E-02
   .7159127E-02   .6491268E-02   .5919934E-02   .5375749E-02   .4729615E-02
   .3761234E-02   .2145076E-02  -.8536881E-04  -.2552412E-02  -.5070708E-02
  -.7608936E-02  -.1014285E-01  -.1278617E-01  -.1503625E-01  -.1609519E-01
  -.1615846E-01  -.1653221E-01  -.1802835E-01  -.1941401E-01  -.1923844E-01
  -.1797220E-01  -.1721644E-01  -.1779773E-01  -.1903522E-01  -.1983605E-01
  -.2005575E-01  -.2029921E-01  -.2075983E-01  -.2139162E-01  -.2210743E-01
  -.2256856E-01  -.2257027E-01  -.2237654E-01  -.2192241E-01  -.2083604E-01
  -.1931427E-01  -.1738067E-01  -.1480951E-01  -.1202764E-01  -.9714722E-02
  -.7443555E-02  -.4779599E-02  -.2337370E-02  -.5121905E-03   .1069424E-02
   .2951292E-02   .4925911E-02   .6603109E-02   .8093486E-02   .9768983E-02
   .1167635E-01   .1312815E-01   .1392759E-01   .1489998E-01   .1653145E-01
   .1832180E-01   .1934023E-01   .1949055E-01   .1989814E-01   .2113435E-01
   .2248402E-01   .2346427E-01   .2434142E-01   .2518296E-01   .2601691E-01
   .2721594E-01   .2880525E-01   .3017491E-01   .3076503E-01   .3066875E-01
   .3022213E-01   .2963000E-01   .2896781E-01   .2806959E-01   .2721155E-01
   .2673072E-01   .2583946E-01   .2407275E-01   .2235190E-01   .2130678E-01
   .2034972E-01   .1882320E-01   .1705150E-01   .1588174E-01   .1518392E-01
   .1354623E-01   .1097800E-01   .9199069E-02   .8360032E-02   .7119784E-02
   .5132781E-02   .3082905E-02   .1003041E-02  -.1294396E-02  -.3106672E-02
  -.4339057E-02  -.6249018E-02  -.9138562E-02  -.1183321E-01  -.1352889E-01
  -.1459670E-01  -.1568313E-01  -.1652718E-01  -.1653147E-01  -.1550438E-01
  -.1393538E-01  -.1262399E-01  -.1133524E-01  -.9397203E-02  -.7262487E-02
  -.5567289E-02  -.4215205E-02  -.2891460E-02  -.1487123E-02  -.5062587E-03
  -.1717292E-03  -.1788318E-03  -.9757622E-03  -.2747340E-02  -.4395551E-02
  -.5496429E-02  -.6997640E-02  -.9225960E-02  -.1135218E-01  -.1287359E-01
  -.1412725E-01  -.1534207E-01  -.1612658E-01  -.1610373E-01  -.1541850E-01
  -.1475450E-01  -.1439677E-01  -.1365342E-01  -.1215805E-01  -.1030351E-01
  -.8430246E-02  -.6554704E-02  -.4550478E-02  -.2614170E-02  -.1320008E-02
  -.9613453E-03  -.1166952E-02  -.1288912E-02  -.1358765E-02  -.1837147E-02
  -.2452623E-02  -.2629783E-02  -.2419981E-02  -.2283245E-02  -.2308684E-02
  -.2054427E-02  -.1334311E-02  -.3932055E-03   .7388125E-03   .2466579E-02
   .4980943E-02   .7451387E-02   .9038662E-02   .1031094E-01   .1206250E-01
   .1391340E-01   .1518129E-01   .1584699E-01   .1593939E-01   .1540119E-01
   .1502152E-01   .1484810E-01   .1365265E-01   .1162426E-01   .9634478E-02
   .7510921E-02   .5148574E-02   .2978229E-02   .1292877E-02  -.7037526E-05
  -.1045797E-02  -.2011205E-02  -.3201101E-02  -.4494174E-02  -.5935155E-02
  -.7918302E-02  -.1024116E-01  -.1204522E-01  -.1285109E-01  -.1312276E-01
  -.1333367E-01  -.1343259E-01  -.1312092E-01  -.1223312E-01  -.1079287E-01
  -.8797500E-02  -.6809015E-02  -.5369814E-02  -.4004278E-02  -.2260073E-02
  -.4198356E-03   .1074346E-02   .2347462E-02   .3909591E-02   .5630142E-02
   .6512740E-02   .5751716E-02   .3879303E-02   .2076393E-02   .7794777E-03
  -.3251878E-03  -.1670305E-02  -.3015463E-02  -.3685966E-02  -.3806584E-02
  -.3976865E-02  -.4243819E-02  -.4308419E-02  -.4024015E-02  -.3595208E-02
  -.3377109E-02  -.3752790E-02  -.4947430E-02  -.6345715E-02  -.7460265E-02
  -.8832865E-02  -.1061296E-01  -.1234728E-01  -.1381841E-01  -.1542544E-01
  -.1761815E-01  -.1982102E-01  -.2167586E-01  -.2359410E-01  -.2568485E-01
  -.2788849E-01  -.3008599E-01  -.3186785E-01  -.3284505E-01  -.3294122E-01
  -.3237990E-01  -.3159237E-01  -.3088271E-01  -.2996409E-01  -.2844857E-01
  -.2634113E-01  -.2373835E-01  -.2095854E-01  -.1790507E-01  -.1402094E-01
  -.9830849E-02  -.6304178E-02  -.3474524E-02  -.1115842E-02   .8526654E-03
   .2518985E-02   .3812795E-02   .4778079E-02   .5911056E-02   .7364966E-02
   .8664201E-02   .9719328E-02   .1042653E-01   .1069762E-01   .1074378E-01
   .1053550E-01   .1028109E-01   .1012534E-01   .9864696E-02   .9532947E-02
   .9393671E-02   .9595242E-02   .1014643E-01   .1126151E-01   .1297779E-01
   .1484249E-01   .1659890E-01   .1845651E-01   .2082535E-01   .2353462E-01
   .2574678E-01   .2711981E-01   .2779165E-01   .2789395E-01   .2750430E-01
   .2653385E-01   .2512680E-01   .2357528E-01   .2184037E-01   .1948584E-01
   .1616364E-01   .1222758E-01   .8413967E-02   .4954038E-02   .1663361E-02
  -.1113084E-02  -.3091114E-02  -.4420557E-02  -.5273875E-02  -.5812136E-02
  -.5948355E-02  -.5852005E-02  -.5582156E-02  -.4925387E-02  -.4019456E-02
  -.2941137E-02  -.1909756E-02  -.1151958E-02  -.5070893E-03   .2939307E-03
   .1442780E-02   .2401437E-02   .2173840E-02   .1121220E-02   .5638699E-03
   .3607277E-03  -.5208733E-03  -.2055718E-02  -.3372049E-02  -.3986850E-02
  -.4333907E-02  -.4963999E-02  -.5847068E-02  -.6848634E-02  -.7894132E-02
  -.8727060E-02  -.9502989E-02  -.1073915E-01  -.1215871E-01  -.1311443E-01
  -.1364147E-01  -.1412492E-01  -.1485177E-01  -.1570500E-01  -.1668864E-01
  -.1824962E-01  -.2045622E-01  -.2260415E-01  -.2404163E-01  -.2542386E-01
  -.2725952E-01  -.2858093E-01  -.2900430E-01  -.2929850E-01  -.2974257E-01
  -.2971456E-01  -.2895594E-01  -.2797480E-01  -.2684173E-01  -.2491116E-01
  -.2167922E-01  -.1766477E-01  -.1380714E-01  -.1047965E-01  -.7507965E-02
  -.4294752E-02  -.7513411E-03   .1936837E-02   .3044134E-02   .3441459E-02
   .3550277E-02   .2824825E-02   .1240344E-02  -.7894519E-03  -.2782270E-02
  -.4737203E-02  -.7253116E-02  -.1027782E-01  -.1280904E-01  -.1441501E-01
  -.1601459E-01  -.1806027E-01  -.1971133E-01  -.2038610E-01  -.2070167E-01
  -.2160137E-01  -.2307588E-01  -.2413055E-01  -.2416248E-01  -.2393232E-01
  -.2424609E-01  -.2443015E-01  -.2364721E-01  -.2253134E-01  -.2205027E-01
  -.2160275E-01  -.2006965E-01  -.1781635E-01  -.1576217E-01  -.1419822E-01
  -.1268671E-01  -.1070739E-01  -.8632319E-02  -.7012056E-02  -.5755014E-02
  -.4498181E-02  -.3021028E-02  -.1217949E-02   .9428253E-03   .3156637E-02
   .5083650E-02   .6678586E-02   .8104807E-02   .9818783E-02   .1204144E-01
   .1370427E-01   .1330447E-01   .1206082E-01   .1307414E-01   .1659488E-01
   .1970413E-01   .1999523E-01   .1757220E-01   .1432178E-01   .1230134E-01
   .1212068E-01   .1268409E-01   .1276324E-01   .1189324E-01   .1033284E-01
   .8946026E-02   .8195282E-02   .7892745E-02   .7839976E-02   .7619342E-02
   .6544558E-02   .3819930E-02  -.4880316E-03  -.2810516E-02   .1595548E-02
   .1004782E-01   .1263576E-01   .4969864E-02  -.6027225E-02  -.1182982E-01
  -.1201645E-01  -.1131225E-01  -.1156818E-01  -.1066075E-01  -.6862678E-02
  -.1907701E-02   .1068881E-02   .1697416E-02   .2165717E-02   .3676044E-02
   .5587195E-02   .7211215E-02   .8510718E-02   .9734561E-02   .1112916E-01
   .1262928E-01   .1362056E-01   .1371108E-01   .1337899E-01   .1323054E-01
   .1286760E-01   .1159259E-01   .9663029E-02   .7678450E-02   .6299088E-02
   .5941929E-02   .5843526E-02   .4876345E-02   .3649960E-02   .4101301E-02
   .6254715E-02   .7905112E-02   .8259026E-02   .8743222E-02   .1011064E-01
   .1172457E-01   .1284042E-01   .1318120E-01   .1327605E-01   .1374541E-01
   .1403438E-01   .1334235E-01   .1171069E-01   .9289799E-02   .6247942E-02
   .3301569E-02   .1054138E-02  -.5016066E-03  -.1718518E-02  -.3175182E-02
  -.4831034E-02  -.5987170E-02  -.6327799E-02  -.5979435E-02  -.5068532E-02
  -.3407705E-02  -.1111029E-02   .1349514E-02   .3926184E-02   .6659758E-02
   .9180845E-02   .1127853E-01   .1323304E-01   .1515186E-01   .1707288E-01
   .1866496E-01   .1918208E-01   .1885222E-01   .1866815E-01   .1877477E-01
   .1839228E-01   .1702282E-01   .1521398E-01   .1372399E-01   .1247877E-01
   .1122431E-01   .9940768E-02   .8922939E-02   .8285299E-02   .7658751E-02
   .7072120E-02   .6982203E-02   .7482056E-02   .8093999E-02   .8627748E-02
   .9222250E-02   .9901814E-02   .1015587E-01   .9274002E-02   .7747271E-02
   .6506054E-02   .5452569E-02   .4090162E-02   .2512528E-02   .1117044E-02
   .2380252E-04  -.1138235E-02  -.2681028E-02  -.4473268E-02  -.6422947E-02
  -.7953527E-02  -.8154956E-02  -.7370473E-02  -.6889050E-02  -.6665102E-02
  -.5679303E-02  -.4276904E-02  -.3071030E-02  -.1800605E-02  -.3917912E-03
   .1084466E-02   .2577335E-02   .3799282E-02   .4780276E-02   .6122722E-02
   .7948027E-02   .9605005E-02   .1068092E-01   .1128974E-01   .1188890E-01
   .1269161E-01   .1317865E-01   .1325320E-01   .1359569E-01   .1431179E-01
   .1528468E-01   .1612264E-01   .1627341E-01   .1605103E-01   .1594648E-01
   .1642602E-01   .1719093E-01   .1731758E-01   .1688270E-01   .1688933E-01
   .1738474E-01   .1751748E-01   .1737187E-01   .1710218E-01   .1657386E-01
   .1627103E-01   .1623377E-01   .1585844E-01   .1507946E-01   .1466184E-01
   .1460650E-01   .1385245E-01   .1274299E-01   .1213480E-01   .1130303E-01
   .9515715E-02   .7334804E-02   .5272399E-02   .3376796E-02   .1703035E-02
   .2210013E-03  -.1172600E-02  -.2529324E-02  -.3552762E-02  -.4202744E-02
  -.4724925E-02  -.4949162E-02  -.4703676E-02  -.4049976E-02  -.3406393E-02
  -.3266475E-02  -.3377311E-02  -.2908595E-02  -.1852992E-02  -.1125814E-02
  -.1037025E-02  -.1000149E-02  -.3323201E-03   .4881506E-03   .1005154E-02
   .1737097E-02   .2745319E-02   .3873506E-02   .5168419E-02   .6632730E-02
   .8210998E-02   .9377317E-02   .9962848E-02   .1060919E-01   .1113654E-01
   .1125214E-01   .1125579E-01   .1118959E-01   .1116307E-01   .1128728E-01
   .1135143E-01   .1130051E-01   .1106215E-01   .1036230E-01   .9604702E-02
   .8842371E-02   .7117300E-02   .4583530E-02   .2698898E-02   .1444475E-02
  -.8987680E-04  -.1695884E-02  -.3192261E-02  -.4314857E-02  -.4539300E-02
  -.4307163E-02  -.4243855E-02  -.4230989E-02  -.4050218E-02  -.3428826E-02
  -.2473105E-02  -.1655036E-02  -.1279179E-02  -.1037256E-02  -.3631732E-03
   .5242628E-03   .1283027E-02   .1515963E-02   .1319059E-02   .1133300E-02
   .1199659E-02   .1698621E-02   .2122239E-02   .2298996E-02   .2790563E-02
   .3841161E-02   .4983595E-02   .6116563E-02   .7790501E-02   .9668626E-02
   .1101095E-01   .1195333E-01   .1316960E-01   .1478988E-01   .1612075E-01
   .1689736E-01   .1741234E-01   .1801148E-01   .1881041E-01   .1901950E-01
   .1794507E-01   .1631694E-01   .1550827E-01   .1542634E-01   .1479981E-01
   .1352637E-01   .1238348E-01   .1185269E-01   .1172230E-01   .1139647E-01
   .1067260E-01   .9677848E-02   .8904974E-02   .8370110E-02   .7729468E-02
   .7031854E-02   .6222833E-02   .5363285E-02   .4202865E-02   .2583990E-02
   .1118139E-02   .2260160E-03  -.2354552E-03  -.9762886E-03  -.2442941E-02
  -.3923723E-02  -.4844184E-02  -.5666321E-02  -.6857095E-02  -.8047336E-02
  -.8845125E-02  -.9351848E-02  -.9506949E-02  -.9472903E-02  -.9381958E-02
  -.8931877E-02  -.7966445E-02  -.6779101E-02  -.5857246E-02  -.5143062E-02
  -.4423822E-02  -.3859140E-02  -.3172102E-02  -.2212885E-02  -.1656447E-02
  -.1774540E-02  -.2039981E-02  -.1963426E-02  -.1730955E-02  -.1782165E-02
  -.2573439E-02  -.3971438E-02  -.5085146E-02  -.5881399E-02  -.6957260E-02
  -.8479520E-02  -.9937172E-02  -.1053240E-01  -.1028187E-01  -.1000416E-01
  -.1063298E-01  -.1227673E-01  -.1368594E-01  -.1403781E-01  -.1426039E-01
  -.1522193E-01  -.1654825E-01  -.1770028E-01  -.1868091E-01  -.1927577E-01
  -.1949749E-01  -.2026833E-01  -.2166882E-01  -.2233979E-01  -.2140500E-01
  -.1967194E-01  -.1833162E-01  -.1746406E-01  -.1650505E-01  -.1525236E-01
  -.1373546E-01  -.1222775E-01  -.1100008E-01  -.9928716E-02  -.8816740E-02
  -.7790751E-02  -.6899881E-02  -.5735114E-02  -.4677107E-02  -.4515320E-02
  -.4790593E-02  -.4271514E-02  -.2708769E-02  -.1385552E-02  -.1395841E-02
  -.1983276E-02  -.1539878E-02   .1942099E-03   .1586680E-02   .9266699E-03
  -.1233651E-02  -.2580180E-02  -.2238743E-02  -.1724242E-02  -.2901947E-02
  -.5384023E-02  -.6863624E-02  -.6855725E-02  -.6753875E-02  -.7642511E-02
  -.9299260E-02  -.1055058E-01  -.1108202E-01  -.1099359E-01  -.1044799E-01
  -.1001982E-01  -.1006610E-01  -.1023370E-01  -.9766136E-02  -.8378669E-02
  -.6478142E-02  -.4505975E-02  -.2434179E-02  -.3795928E-03   .1343417E-02
   .2839004E-02   .4530696E-02   .6500903E-02   .8567672E-02   .1031167E-01
   .1129839E-01   .1180708E-01   .1246893E-01   .1332958E-01   .1387490E-01
   .1393406E-01   .1376688E-01   .1373339E-01   .1391253E-01   .1404989E-01
   .1403953E-01   .1394651E-01   .1402557E-01   .1450645E-01   .1474379E-01
   .1442768E-01   .1433713E-01   .1452032E-01   .1435007E-01   .1384840E-01
   .1314394E-01   .1180521E-01   .9714050E-02   .7399747E-02   .5514051E-02
   .4029972E-02   .2496011E-02   .8529977E-03  -.4901047E-03  -.1114083E-02
  -.1567251E-02  -.2566709E-02  -.3411096E-02  -.3004695E-02  -.1860200E-02
  -.1041600E-02  -.4512937E-03   .3245382E-03   .1153334E-02   .1635600E-02
   .1698740E-02   .1536252E-02   .1399663E-02   .1690781E-02   .2326692E-02
   .2706891E-02   .2366370E-02   .1433477E-02   .6957912E-03   .4935381E-03
   .2430829E-03  -.3279534E-03  -.7373988E-03  -.8770457E-03  -.9334646E-03
  -.4698549E-03   .5536660E-03   .1522439E-02   .2413165E-02   .3357975E-02
   .3827534E-02   .3614718E-02   .3323214E-02   .3038527E-02   .2137383E-02
   .3712209E-03  -.1534772E-02  -.2734381E-02  -.3474894E-02  -.4570848E-02
  -.6011492E-02  -.6840555E-02  -.6557820E-02  -.5572160E-02  -.4436157E-02
  -.3270278E-02  -.1951811E-02  -.4937898E-03   .1037811E-02   .2726963E-02
   .4359203E-02   .5339407E-02   .5783899E-02   .6144208E-02   .6396651E-02
   .6429654E-02   .6116237E-02   .5171948E-02   .3834388E-02   .2888080E-02
   .2439960E-02   .1912826E-02   .1037283E-02  -.1885851E-03  -.1706955E-02
  -.3284250E-02  -.4971080E-02  -.6779461E-02  -.8717451E-02  -.1113308E-01
  -.1405354E-01  -.1712773E-01  -.1969569E-01  -.2144026E-01  -.2302666E-01
  -.2489874E-01  -.2673444E-01  -.2822967E-01  -.2929542E-01  -.3022326E-01
  -.3115761E-01  -.3163283E-01  -.3152118E-01  -.3134060E-01  -.3131056E-01
  -.3065563E-01  -.2884954E-01  -.2662979E-01  -.2472507E-01  -.2329451E-01
  -.2189760E-01  -.1981203E-01  -.1748175E-01  -.1581390E-01  -.1460072E-01
  -.1318390E-01  -.1178496E-01  -.1104878E-01  -.1065889E-01  -.9690432E-02
  -.8449098E-02  -.7785889E-02  -.7118731E-02  -.5976228E-02  -.5055722E-02
  -.4492124E-02  -.3560885E-02  -.2437366E-02  -.2066441E-02  -.2186722E-02
  -.2038947E-02  -.1772478E-02  -.2010439E-02  -.2972382E-02  -.3839239E-02
  -.3975513E-02  -.3861500E-02  -.4246278E-02  -.5102283E-02  -.5531971E-02
  -.5312077E-02  -.4972579E-02  -.4912597E-02  -.4742178E-02  -.3608614E-02
  -.2091261E-02  -.1525335E-02  -.1924352E-02  -.2319745E-02  -.2150986E-02
  -.1503803E-02  -.6823560E-03  -.9575043E-04  -.3136192E-03  -.1002610E-02
  -.1017624E-02  -.3057615E-03   .4291653E-03   .9263521E-03   .1224063E-02
   .1257566E-02   .1130958E-02   .1376663E-02   .2520403E-02   .4502789E-02
   .6489197E-02   .7893041E-02   .9255505E-02   .1122863E-01   .1363209E-01
   .1567286E-01   .1697163E-01   .1784577E-01   .1853654E-01   .1923222E-01
   .1976936E-01   .1984560E-01   .1964689E-01   .1920588E-01   .1845809E-01
   .1755386E-01   .1648938E-01   .1538437E-01   .1422431E-01   .1278156E-01
   .1125221E-01   .9815186E-02   .8035325E-02   .5676294E-02   .3496993E-02
   .2027897E-02   .1178359E-02   .7779821E-03   .2157332E-03  -.9787481E-03
  -.2260333E-02  -.3161416E-02  -.4027477E-02  -.4970584E-02  -.5791632E-02
  -.6513695E-02  -.7418019E-02  -.8795770E-02  -.1028553E-01  -.1101130E-01
  -.1085141E-01  -.1053604E-01  -.1092754E-01  -.1218377E-01  -.1294059E-01
  -.1206201E-01  -.1060964E-01  -.1022763E-01  -.1082559E-01  -.1130267E-01
  -.1117024E-01  -.1057144E-01  -.1003875E-01  -.1018790E-01  -.1086835E-01
  -.1125952E-01  -.1113404E-01  -.1090893E-01  -.1085626E-01  -.1080083E-01
  -.1046582E-01  -.9841604E-02  -.8868211E-02  -.7962802E-02  -.7838105E-02
  -.8203907E-02  -.8335153E-02  -.8141540E-02  -.7881631E-02  -.7774952E-02
  -.7806256E-02  -.7789781E-02  -.7703304E-02  -.7650953E-02  -.7934847E-02
  -.8695089E-02  -.9476949E-02  -.1000441E-01  -.1023454E-01  -.1013156E-01
  -.1001970E-01  -.1003243E-01  -.1008147E-01  -.1011639E-01  -.1007415E-01
  -.1004798E-01  -.1004348E-01  -.9967130E-02  -.9905572E-02  -.9933254E-02
  -.9937073E-02  -.9896899E-02  -.9894540E-02  -.1028831E-01  -.1150833E-01
  -.1295572E-01  -.1347751E-01  -.1274535E-01  -.1114656E-01  -.9236067E-02
  -.7908627E-02  -.7666156E-02  -.7569154E-02  -.6478179E-02  -.4937710E-02
  -.3927929E-02  -.3136213E-02  -.2390881E-02  -.2155381E-02  -.2176171E-02
  -.1946071E-02  -.1405310E-02  -.4571753E-03   .4840125E-03   .7306715E-03
   .7068354E-03   .1406178E-02   .2765457E-02   .3934119E-02   .5073539E-02
   .6859303E-02   .8667929E-02   .9904791E-02   .1152321E-01   .1403557E-01
   .1644049E-01   .1801752E-01   .1909787E-01   .1992253E-01   .2034384E-01
   .2035643E-01   .2019915E-01   .1979470E-01   .1880647E-01   .1755093E-01
   .1647261E-01   .1552993E-01   .1462510E-01   .1370819E-01   .1251070E-01
   .1104851E-01   .9928860E-02   .9343402E-02   .8677721E-02   .7360812E-02
   .5685637E-02   .4511797E-02   .4020291E-02   .3555925E-02   .2752664E-02
   .1820471E-02   .1142091E-02   .8393602E-03   .4467502E-03  -.4430794E-03
  -.1505753E-02  -.2329879E-02  -.2949604E-02  -.3586982E-02  -.4575693E-02
  -.5860807E-02  -.7101943E-02  -.8369247E-02  -.9671097E-02  -.1091072E-01
  -.1195303E-01  -.1244377E-01  -.1237676E-01  -.1218974E-01  -.1195060E-01
  -.1107176E-01  -.9278421E-02  -.7155415E-02  -.5353815E-02  -.3768835E-02
  -.2122038E-02  -.5410337E-03   .1009274E-02   .2822738E-02   .4641246E-02
   .5710289E-02   .5957752E-02   .6256307E-02   .6756280E-02   .6580788E-02
   .5922922E-02   .5633049E-02   .5324803E-02   .4293413E-02   .3275927E-02
   .3197499E-02   .3550801E-02   .3704237E-02   .3942958E-02   .4495115E-02
   .4845036E-02   .5061506E-02   .5697697E-02   .6418056E-02   .7159680E-02
   .8412426E-02   .1009171E-01   .1135569E-01   .1144180E-01   .1068063E-01
   .9917898E-02   .9804141E-02   .1062079E-01   .1154580E-01   .1110515E-01
   .9226779E-02   .7433857E-02   .6528982E-02   .5969839E-02   .5010717E-02
   .3470401E-02   .2257279E-02   .2218960E-02   .3002858E-02   .3892161E-02
   .4613921E-02   .5146473E-02   .5662781E-02   .6347333E-02   .7093659E-02
   .7766834E-02   .8058349E-02   .8029954E-02   .8243994E-02   .8473432E-02
   .8213243E-02   .7802341E-02   .7598759E-02   .7139594E-02   .6102446E-02
   .5335720E-02   .5438099E-02   .5800398E-02   .5769039E-02   .5337244E-02
   .5198477E-02   .5519483E-02   .5842420E-02   .6144801E-02   .6314046E-02
   .6409774E-02   .6915830E-02   .7852634E-02   .8983902E-02   .1028519E-01
   .1169079E-01   .1313848E-01   .1460216E-01   .1621258E-01   .1803684E-01
   .1931882E-01   .1967349E-01   .2022383E-01   .2141213E-01   .2200087E-01
   .2156094E-01   .2095833E-01   .2058781E-01   .2015450E-01   .1947468E-01
   .1870642E-01   .1740367E-01   .1540165E-01   .1403930E-01   .1379921E-01
   .1365835E-01   .1322851E-01   .1290965E-01   .1288004E-01   .1297348E-01
   .1295753E-01   .1232754E-01   .1100588E-01   .9973743E-02   .9917884E-02
   .1016069E-01   .9346126E-02   .7482885E-02   .5903057E-02   .4997998E-02
   .4139359E-02   .2779217E-02   .9968167E-03  -.7097143E-03  -.2113977E-02
  -.3608815E-02  -.5536437E-02  -.7410404E-02  -.9055314E-02  -.1100347E-01
  -.1329023E-01  -.1528559E-01  -.1643960E-01  -.1675032E-01  -.1647823E-01
  -.1558968E-01  -.1400869E-01  -.1214036E-01  -.1029089E-01  -.8137938E-02
  -.5506072E-02  -.2883669E-02  -.8718655E-03   .4780973E-03   .1773046E-02
   .3579793E-02   .5357606E-02   .6037334E-02   .5637971E-02   .5277099E-02
   .5466533E-02   .5561880E-02   .5172760E-02   .4540790E-02   .4123542E-02
   .4105832E-02   .4093976E-02   .4230746E-02   .5121079E-02   .6523846E-02
   .7882689E-02   .9030644E-02   .1014381E-01   .1141768E-01   .1249020E-01
   .1278623E-01   .1253351E-01   .1236102E-01   .1196553E-01   .1083848E-01
   .9276226E-02   .7623829E-02   .5618179E-02   .2766714E-02  -.6969593E-03
  -.3561706E-02  -.5070148E-02  -.6007682E-02  -.7212652E-02  -.8473360E-02
  -.9241757E-02  -.9323718E-02  -.8957304E-02  -.8585556E-02  -.8730755E-02
  -.9088975E-02  -.8793056E-02  -.8054922E-02  -.7937478E-02  -.8612169E-02
  -.8974429E-02  -.8468364E-02  -.7923474E-02  -.8213528E-02  -.8969035E-02
  -.9321014E-02  -.9165166E-02  -.9015683E-02  -.9582160E-02  -.1054420E-01
  -.1064902E-01  -.1023783E-01  -.1053702E-01  -.1128027E-01  -.1162746E-01
  -.1138205E-01  -.1066479E-01  -.9636794E-02  -.9048636E-02  -.9520867E-02
  -.1040095E-01  -.1076721E-01  -.1026493E-01  -.9344615E-02  -.8677755E-02
  -.7947410E-02  -.6694630E-02  -.5586275E-02  -.5099980E-02  -.4450301E-02
  -.2961631E-02  -.9972971E-03   .4338150E-03   .9396972E-03   .1543880E-02
   .2828212E-02   .3866455E-02   .4482505E-02   .5405148E-02   .6221258E-02
   .6185249E-02   .5509097E-02   .4613031E-02   .4003098E-02   .4139862E-02
   .4258493E-02   .3382666E-02   .1946130E-02   .7672828E-03  -.3120757E-03
  -.2026406E-02  -.4219710E-02  -.6094771E-02  -.7626476E-02  -.9012223E-02
  -.1007282E-01  -.1103303E-01  -.1241177E-01  -.1393555E-01  -.1471110E-01
  -.1456526E-01  -.1427656E-01  -.1427473E-01  -.1394311E-01  -.1269737E-01
  -.1094683E-01  -.9443372E-02  -.8248360E-02  -.6975127E-02  -.5455452E-02
  -.3611276E-02  -.1658913E-02   .1373541E-03   .1811776E-02   .3312645E-02
   .4763158E-02   .6391345E-02   .7865528E-02   .8645770E-02   .8943635E-02
   .9392839E-02   .9911969E-02   .9804835E-02   .9081572E-02   .8587211E-02
   .8376491E-02   .7638785E-02   .6526755E-02   .6059697E-02   .6359044E-02
   .6684596E-02   .6619420E-02   .6384120E-02   .6421987E-02   .6866842E-02
   .7430895E-02   .7915979E-02   .8380062E-02   .8775378E-02   .8924088E-02
   .8566949E-02   .7713125E-02   .6640402E-02   .5407257E-02   .4127952E-02
   .3012444E-02   .1488696E-02  -.7897155E-03  -.2531196E-02  -.3035675E-02
  -.3674810E-02  -.5559048E-02  -.8114530E-02  -.9991777E-02  -.1041218E-01
  -.1011153E-01  -.1016685E-01  -.1061028E-01  -.1107341E-01  -.1133427E-01
  -.1113865E-01  -.1056118E-01  -.1021935E-01  -.1033680E-01  -.1019226E-01
  -.9122560E-02  -.7725611E-02  -.7100804E-02  -.7041255E-02  -.6408004E-02
  -.5043868E-02  -.3808872E-02  -.2865291E-02  -.1459166E-02   .4402649E-03
   .1918301E-02   .2760979E-02   .3602246E-02   .4495655E-02   .4850610E-02
   .4519163E-02   .4451292E-02   .5470642E-02   .6619472E-02   .6810189E-02
   .6581762E-02   .6651091E-02   .6866220E-02   .6918022E-02   .6806488E-02
   .6816767E-02   .7396442E-02   .8589389E-02   .9634799E-02   .9902967E-02
   .9936532E-02   .1056998E-01   .1151503E-01   .1163868E-01   .1057758E-01
   .9570336E-02   .9502788E-02   .9615504E-02   .8854768E-02   .7116276E-02
   .5015869E-02   .2904572E-02   .8252975E-03  -.1102934E-02  -.2677510E-02
  -.4190328E-02  -.6033169E-02  -.8078580E-02  -.1023917E-01  -.1229776E-01
  -.1375127E-01  -.1463596E-01  -.1571216E-01  -.1724192E-01  -.1854900E-01
  -.1925627E-01  -.1970518E-01  -.1988672E-01  -.1919932E-01  -.1786491E-01
  -.1704695E-01  -.1699610E-01  -.1655061E-01  -.1481252E-01  -.1248912E-01
  -.1088264E-01  -.1003298E-01  -.8959774E-02  -.7292906E-02  -.5783535E-02
  -.4966102E-02  -.4210790E-02  -.3068074E-02  -.1751182E-02  -.6081721E-03
  -.6530314E-04   .1116673E-03   .3975960E-03   .6662475E-03   .7389923E-03
   .6973690E-03   .7192223E-03   .7898307E-03   .8164366E-03   .8309402E-03
   .7244993E-03   .2637851E-03  -.3965717E-03  -.4420088E-03   .3777807E-03
   .1070374E-02   .9394035E-03   .4750329E-03   .3419796E-03   .2783587E-03
  -.6125389E-03  -.2143212E-02  -.3184120E-02  -.3851234E-02  -.5050516E-02
  -.6798644E-02  -.8258451E-02  -.8781092E-02  -.8931918E-02  -.9440693E-02
  -.1000287E-01  -.1000421E-01  -.9140391E-02  -.7599200E-02  -.5974542E-02
  -.4649291E-02  -.3265193E-02  -.1486851E-02   .1505381E-03   .1228953E-02
   .1890632E-02   .2161034E-02   .2291243E-02   .2882093E-02   .3890138E-02
   .4336671E-02   .3668459E-02   .2736127E-02   .2575692E-02   .3021646E-02
   .3318865E-02   .3471052E-02   .3944310E-02   .4501434E-02   .4678583E-02
   .4755757E-02   .5472216E-02   .6585441E-02   .7120489E-02   .7458197E-02
   .8603753E-02   .1038944E-01   .1174900E-01   .1202374E-01   .1197612E-01
   .1279527E-01   .1426931E-01   .1518395E-01   .1528787E-01   .1523871E-01
   .1503462E-01   .1437060E-01   .1360341E-01   .1314923E-01   .1246345E-01
   .1073482E-01   .8220216E-02   .5705049E-02   .3385971E-02   .1141139E-02
  -.1119068E-02  -.3603821E-02  -.6287651E-02  -.8853745E-02  -.1093737E-01
  -.1274240E-01  -.1491451E-01  -.1689745E-01  -.1748695E-01  -.1695488E-01
  -.1660306E-01  -.1680596E-01  -.1661524E-01  -.1547990E-01  -.1405153E-01
  -.1276666E-01  -.1144467E-01  -.9823786E-02  -.7888496E-02  -.6060472E-02
  -.4593465E-02  -.3498036E-02  -.2889920E-02  -.2779441E-02  -.2900881E-02
  -.2892652E-02  -.2718880E-02  -.2795657E-02  -.3600856E-02  -.4974851E-02
  -.6159224E-02  -.7031270E-02  -.8139744E-02  -.9190521E-02  -.9505669E-02
  -.9687525E-02  -.1038342E-01  -.1103341E-01  -.1129546E-01  -.1146628E-01
  -.1160117E-01  -.1163566E-01  -.1161801E-01  -.1140595E-01  -.1105280E-01
  -.1086968E-01  -.1066769E-01  -.1005925E-01  -.9191940E-02  -.8673735E-02
  -.8770484E-02  -.9053279E-02  -.9059378E-02  -.8524989E-02  -.7353926E-02
  -.5769123E-02  -.3931888E-02  -.1842047E-02   .1754098E-03   .1643536E-02
   .2466993E-02   .3042153E-02   .3818103E-02   .4701362E-02   .5174302E-02
   .5108566E-02   .4911227E-02   .4907529E-02   .4903781E-02   .4280837E-02
   .3060538E-02   .2001446E-02   .1510722E-02   .1367783E-02   .1011968E-02
   .3144308E-03  -.1844014E-03  -.3188816E-04   .5570414E-03   .9192019E-03
   .8209138E-03   .4545753E-03   .8137992E-05  -.2117489E-03   .9225525E-04
   .6894585E-03   .7818674E-03   .1715469E-03  -.3624174E-03  -.3181438E-03
   .1580661E-03   .8478606E-03   .1567135E-02   .2195172E-02   .2967725E-02
   .4235329E-02   .5697799E-02   .6889369E-02   .7825893E-02   .8445243E-02
   .8797519E-02   .9271458E-02   .9663547E-02   .9773221E-02   .1034346E-01
   .1139375E-01   .1189755E-01   .1163745E-01   .1128323E-01   .1109885E-01
   .1091917E-01   .1078771E-01   .1084270E-01   .1118469E-01   .1163427E-01
   .1203859E-01   .1259178E-01   .1334182E-01   .1406074E-01   .1443937E-01
   .1470966E-01   .1559726E-01   .1723460E-01   .1895636E-01   .2009988E-01
   .2076342E-01   .2161052E-01   .2277812E-01   .2371679E-01   .2401589E-01
   .2385957E-01   .2367704E-01   .2343129E-01   .2272787E-01   .2152753E-01
   .2029414E-01   .1918140E-01   .1781938E-01   .1589553E-01   .1326767E-01
   .1028811E-01   .7869687E-02   .6329511E-02   .4793760E-02   .2669575E-02
   .4231130E-03  -.1512499E-02  -.2940112E-02  -.3892159E-02  -.4819747E-02
  -.5752668E-02  -.6159382E-02  -.6166710E-02  -.6707908E-02  -.7997628E-02
  -.9059000E-02  -.9151035E-02  -.9053555E-02  -.1001719E-01  -.1141349E-01
  -.1169791E-01  -.1135625E-01  -.1189624E-01  -.1308395E-01  -.1361954E-01
  -.1328874E-01  -.1289885E-01  -.1293110E-01  -.1294286E-01  -.1238743E-01
  -.1165579E-01  -.1146240E-01  -.1177059E-01  -.1200105E-01  -.1190568E-01
  -.1169739E-01  -.1136858E-01  -.1070741E-01  -.9914029E-02  -.9534278E-02
  -.9622289E-02  -.9633709E-02  -.9810712E-02  -.1056480E-01  -.1106900E-01
  -.1101953E-01  -.1120628E-01  -.1173538E-01  -.1203773E-01  -.1192852E-01
  -.1185386E-01  -.1234669E-01  -.1321537E-01  -.1381363E-01  -.1392999E-01
  -.1355938E-01  -.1296855E-01  -.1293008E-01  -.1339184E-01  -.1317152E-01
  -.1192632E-01  -.1082744E-01  -.1034382E-01  -.9656627E-02  -.8580739E-02
  -.7609820E-02  -.6920305E-02  -.6307802E-02  -.5488312E-02  -.4084503E-02
  -.2037915E-02  -.3441839E-03   .2046481E-03   .6141132E-03   .2346963E-02
   .5016889E-02   .7090342E-02   .8190136E-02   .9167508E-02   .1045504E-01
   .1162280E-01   .1255918E-01   .1340603E-01   .1346201E-01   .1253813E-01
   .1181801E-01   .1176137E-01   .1135739E-01   .9925395E-02   .8230443E-02
   .7046060E-02   .6211164E-02   .5252030E-02   .3912168E-02   .2769062E-02
   .2522412E-02   .2861664E-02   .3026142E-02   .2818946E-02   .2558019E-02
   .2565449E-02   .3330110E-02   .4867337E-02   .5996673E-02   .5935533E-02
   .5365859E-02   .5198230E-02   .5565685E-02   .6141783E-02   .6431054E-02
   .6076999E-02   .5522841E-02   .5340284E-02   .5073865E-02   .4150783E-02
   .3232013E-02   .3126900E-02   .3544846E-02   .3666871E-02   .3143971E-02
   .2425436E-02   .1761087E-02   .7084028E-03  -.8684799E-03  -.2376334E-02
  -.3389153E-02  -.4363002E-02  -.5663305E-02  -.6692665E-02  -.6870180E-02
  -.6809505E-02  -.7423839E-02  -.8278363E-02  -.8604506E-02  -.8472388E-02
  -.7834825E-02  -.6848342E-02  -.6354926E-02  -.6414411E-02  -.6334166E-02
  -.5841619E-02  -.5265092E-02  -.5212098E-02  -.5744700E-02  -.6205401E-02
  -.6131391E-02  -.5824607E-02  -.5742192E-02  -.5869663E-02  -.5766639E-02
  -.5143386E-02  -.4429982E-02  -.4023221E-02  -.3845144E-02  -.3766242E-02
  -.3512929E-02  -.3059842E-02  -.2751879E-02  -.2519773E-02  -.2285891E-02
  -.2429381E-02  -.2897492E-02  -.3122980E-02  -.2919509E-02  -.2374420E-02
  -.1370542E-02  -.2429096E-03   .2913449E-03   .3728330E-03   .7977982E-03
   .1880677E-02   .3399303E-02   .4897273E-02   .5988659E-02   .7047152E-02
   .8734910E-02   .1071257E-01   .1193712E-01   .1202674E-01   .1163185E-01
   .1155665E-01   .1202507E-01   .1273551E-01   .1286055E-01   .1180611E-01
   .1047315E-01   .9998102E-02   .9990005E-02   .9699645E-02   .8995080E-02
   .7806586E-02   .6363834E-02   .5137788E-02   .4149428E-02   .3386095E-02
   .3134727E-02   .3128335E-02   .2473965E-02   .1063060E-02   .6750644E-05
   .1008249E-04   .4968528E-03   .8581700E-03   .1399285E-02   .2447300E-02
   .3355181E-02   .3792871E-02   .4613379E-02   .6348072E-02   .8328316E-02
   .9376991E-02   .9255143E-02   .9084969E-02   .9954288E-02   .1112532E-01
   .1103389E-01   .1017480E-01   .1007451E-01   .1086358E-01   .1134542E-01
   .1050227E-01   .8820449E-02   .7402307E-02   .6640520E-02   .6304652E-02
   .5749235E-02   .4424889E-02   .3061806E-02   .2777732E-02   .3263599E-02
   .3518650E-02   .3302786E-02   .2983289E-02   .2598023E-02   .2063825E-02
   .1923782E-02   .2567721E-02   .3301659E-02   .3346445E-02   .2954070E-02
   .2732449E-02   .2880121E-02   .3492872E-02   .4615672E-02   .5814571E-02
   .6619109E-02   .7148327E-02   .7740966E-02   .8440915E-02   .8900307E-02
   .8947227E-02   .8864630E-02   .8816485E-02   .8611709E-02   .8318309E-02
   .8075797E-02   .7450918E-02   .6470358E-02   .5960627E-02   .6016113E-02
   .5428745E-02   .3404693E-02   .1024016E-02  -.3216369E-05   .3548782E-03
   .3628081E-03  -.9520517E-03  -.2504795E-02  -.3111804E-02  -.3114248E-02
  -.3459203E-02  -.4354736E-02  -.5186138E-02  -.5418251E-02  -.5154457E-02
  -.5170662E-02  -.6295512E-02  -.7984547E-02  -.8737910E-02  -.8309557E-02
  -.7967369E-02  -.8806879E-02  -.1049175E-01  -.1163414E-01  -.1155133E-01
  -.1098747E-01  -.1101406E-01  -.1171803E-01  -.1211390E-01  -.1184437E-01
  -.1164309E-01  -.1187473E-01  -.1246808E-01  -.1308443E-01  -.1279410E-01
  -.1154255E-01  -.1051037E-01  -.9893709E-02  -.8887797E-02  -.7510366E-02
  -.6460846E-02  -.5916293E-02  -.5652740E-02  -.5585351E-02  -.5582201E-02
  -.5564199E-02  -.5487178E-02  -.4953701E-02  -.3683731E-02  -.2475837E-02
  -.2339068E-02  -.2889769E-02  -.2898049E-02  -.1735440E-02  -.1066261E-03
   .6593314E-03   .3218882E-03   .8472940E-04   .1049530E-02   .2717279E-02
   .3623874E-02   .3037839E-02   .1520282E-02   .4857861E-03   .6080844E-03
   .9432937E-03   .6889577E-03   .2210882E-03   .7519420E-04   .2070675E-03
   .2997805E-03   .2316594E-03   .1040722E-03   .5730448E-04   .1868515E-03
   .8248314E-03   .1891576E-02   .2573439E-02   .2706286E-02   .2765235E-02
   .2889298E-02   .2976058E-02   .3049903E-02   .3348344E-02   .3785509E-02
   .3940703E-02   .3795281E-02   .3676020E-02   .3651750E-02   .3453566E-02
   .3088910E-02   .2631349E-02   .1961813E-02   .1170385E-02   .4246927E-03
  -.3235164E-03  -.1408617E-02  -.2838551E-02  -.4033121E-02  -.4681751E-02
  -.5212396E-02  -.6321280E-02  -.7871378E-02  -.8775060E-02  -.8577042E-02
  -.8128355E-02  -.8490381E-02  -.9544687E-02  -.1030815E-01  -.1048610E-01
  -.1042586E-01  -.1047607E-01  -.1085621E-01  -.1130151E-01  -.1141179E-01
  -.1125809E-01  -.1116947E-01  -.1112406E-01  -.1072372E-01  -.9897969E-02
  -.9012560E-02  -.8447642E-02  -.8234337E-02  -.7776539E-02  -.6492139E-02
  -.4830958E-02  -.3744995E-02  -.3191979E-02  -.2264435E-02  -.6660642E-03
   .1101020E-02   .2499677E-02   .3146224E-02   .3332859E-02   .4151464E-02
   .5683346E-02   .6604287E-02   .6248589E-02   .5215953E-02   .4322267E-02
   .3478840E-02   .2043848E-02   .1890781E-03  -.1446610E-02  -.2770613E-02
  -.4085585E-02  -.5553726E-02  -.7121028E-02  -.8326352E-02  -.8447680E-02
  -.7720674E-02  -.7440151E-02  -.8114318E-02  -.8671662E-02  -.7969944E-02
  -.6371674E-02  -.5119075E-02  -.4461335E-02  -.3743202E-02  -.2970710E-02
  -.2670643E-02  -.2821431E-02  -.2967958E-02  -.2854826E-02  -.2631822E-02
  -.2537598E-02  -.2607036E-02  -.2676838E-02  -.2644313E-02  -.2566684E-02
  -.2311855E-02  -.1931866E-02  -.1975831E-02  -.2233325E-02  -.1631776E-02
  -.1854362E-03   .8093835E-03   .6933450E-03   .1458283E-03   .2455060E-04
   .3294330E-03   .5748567E-03   .5534995E-03   .1760010E-03  -.7878629E-03
  -.2099584E-02  -.2840266E-02  -.2647354E-02  -.2230760E-02  -.2200679E-02
  -.2264395E-02  -.2046589E-02  -.1790650E-02  -.1534835E-02  -.8444592E-03
   .3586155E-03   .1244273E-02   .1033003E-02   .4787722E-03   .5772796E-03
   .8437454E-03   .6637432E-03   .2652437E-03  -.4027143E-03  -.1384203E-02
  -.2020755E-02  -.2130624E-02  -.2225255E-02  -.2640557E-02  -.3104197E-02
  -.2980548E-02  -.2391386E-02  -.2105881E-02  -.2313149E-02  -.2484037E-02
  -.1825668E-02  -.2800261E-03   .9014539E-03   .8618369E-03   .2585559E-03
   .5453101E-04   .4460342E-03   .1085439E-02   .1375565E-02   .1028093E-02
   .7287123E-03   .9736097E-03   .1401445E-02   .1850840E-02   .2481775E-02
   .3265448E-02   .4031902E-02   .4508518E-02   .4447229E-02   .4577483E-02
   .5928026E-02   .7808317E-02   .8850510E-02   .8989140E-02   .8906866E-02
   .8965887E-02   .9250406E-02   .9726870E-02   .1006128E-01   .1009763E-01
   .1033935E-01   .1103876E-01   .1132517E-01   .1039668E-01   .9071898E-02
   .8691891E-02   .9069043E-02   .8969403E-02   .8016530E-02   .6868405E-02
   .6217673E-02   .6207283E-02   .6469990E-02   .6437770E-02   .5638696E-02
   .4265953E-02   .3108923E-02   .2387079E-02   .1685675E-02   .1292664E-02
   .1548308E-02   .1557193E-02   .7874096E-03   .1294142E-03   .7943975E-04
  -.5788406E-04  -.6340572E-03  -.1213277E-02  -.1703188E-02  -.2230349E-02
  -.2535030E-02  -.2474102E-02  -.2315107E-02  -.2335697E-02  -.2472447E-02
  -.2529391E-02  -.2325678E-02  -.1535176E-02  -.2618847E-03   .6441598E-03
   .6316457E-03   .1926471E-03   .2794839E-04   .2258803E-03   .4784962E-03
   .5380157E-03   .6297463E-03   .9770116E-03   .1248200E-02   .1205358E-02
   .8809657E-03   .4459243E-03   .2626869E-03   .3716326E-03   .4780641E-03
   .4369271E-03   .3368706E-03   .3079027E-03   .3777778E-03   .4271548E-03
   .4133427E-03   .4264677E-03   .4839467E-03   .7795668E-03   .1455893E-02
   .2082398E-02   .2193252E-02   .1954683E-02   .1824956E-02   .1951473E-02
   .2103820E-02   .1891437E-02   .1401174E-02   .1387750E-02   .2215216E-02
   .3289879E-02   .3585956E-02   .2756352E-02   .2023239E-02   .2606876E-02
   .3761495E-02   .4119184E-02   .3749425E-02   .4018676E-02   .5501000E-02
   .6878649E-02   .6961283E-02   .6324990E-02   .6386259E-02   .7696092E-02
   .9266627E-02   .9857212E-02   .9745780E-02   .9981551E-02   .1063155E-01
   .1127118E-01   .1185822E-01   .1226597E-01   .1227789E-01   .1212423E-01
   .1240514E-01   .1346034E-01   .1455165E-01   .1477891E-01   .1458591E-01
   .1473250E-01   .1498970E-01   .1472099E-01   .1384023E-01   .1281773E-01
   .1215651E-01   .1203488E-01   .1215343E-01   .1177765E-01   .1045235E-01
   .8633448E-02   .7090058E-02   .6243017E-02   .5724137E-02   .4879241E-02
   .4040947E-02   .3786211E-02   .3549658E-02   .2442778E-02   .8187276E-03
  -.8036162E-04   .1562253E-03   .5145371E-03  -.3181139E-03  -.1997775E-02
  -.2730942E-02  -.2141795E-02  -.1398687E-02  -.9972932E-03  -.5978754E-03
  -.9336069E-04   .1594779E-03   .1901247E-03   .5938971E-03   .1382963E-02
   .1966707E-02   .2193133E-02   .2254642E-02   .2156483E-02   .1574550E-02
   .5066164E-03  -.1350354E-03  -.1406612E-03  -.7274149E-03  -.2253463E-02
  -.3768976E-02  -.4908876E-02  -.6124017E-02  -.7683976E-02  -.9237615E-02
  -.1025416E-01  -.1096088E-01  -.1208024E-01  -.1372066E-01  -.1522618E-01
  -.1606844E-01  -.1669305E-01  -.1770777E-01  -.1867476E-01  -.1907224E-01
  -.1933972E-01  -.1984773E-01  -.2026059E-01  -.2010945E-01  -.1919408E-01
  -.1790195E-01  -.1674621E-01  -.1564762E-01  -.1464717E-01  -.1389824E-01
  -.1294536E-01  -.1178125E-01  -.1120249E-01  -.1120146E-01  -.1086717E-01
  -.9925213E-02  -.8908556E-02  -.8374003E-02  -.8426030E-02  -.8883616E-02
  -.9550645E-02  -.1002852E-01  -.1025837E-01  -.1064647E-01  -.1116394E-01
  -.1140736E-01  -.1130039E-01  -.1115210E-01  -.1119624E-01  -.1132319E-01
  -.1136270E-01  -.1133615E-01  -.1129591E-01  -.1098252E-01  -.9984963E-02
  -.8684305E-02  -.8090632E-02  -.8289532E-02  -.7988483E-02  -.6495708E-02
  -.5079283E-02  -.4891927E-02  -.5152749E-02  -.4752431E-02  -.4219348E-02
  -.4294049E-02  -.4349577E-02  -.3687264E-02  -.2691776E-02  -.2422578E-02
  -.3060303E-02  -.3688011E-02  -.3899291E-02  -.3911995E-02  -.3797990E-02
  -.3373029E-02  -.2688647E-02  -.2355785E-02  -.2891907E-02  -.3869149E-02
  -.4386884E-02  -.4537295E-02  -.4929745E-02  -.5404089E-02  -.5450795E-02
  -.4973310E-02  -.4481515E-02  -.4434297E-02  -.4680956E-02  -.4732508E-02
  -.4171836E-02  -.3196031E-02  -.2352473E-02  -.1612379E-02  -.5939835E-03
   .3735339E-03   .7645917E-03   .1118570E-02   .2172520E-02   .3377618E-02
   .3993353E-02   .4665152E-02   .5833534E-02   .6832221E-02   .7712538E-02
   .8778828E-02   .9560260E-02   .1001884E-01   .1065445E-01   .1138291E-01
   .1149369E-01   .1090271E-01   .1061181E-01   .1131877E-01   .1234188E-01
   .1262750E-01   .1223124E-01   .1191546E-01   .1197749E-01   .1201885E-01
   .1135764E-01   .1000223E-01   .8818264E-02   .8404186E-02   .8535181E-02
   .8241474E-02   .6874829E-02   .5410806E-02   .5053550E-02   .5110404E-02
   .4347083E-02   .3032420E-02   .2306383E-02   .2896909E-02   .4093978E-02
   .4314919E-02   .3666038E-02   .3884432E-02   .5366651E-02   .6587349E-02
   .6546387E-02   .5936456E-02   .5734104E-02   .6026785E-02   .6330326E-02
   .6279913E-02   .5760389E-02   .4973399E-02   .4449604E-02   .4227370E-02
   .3833675E-02   .3344379E-02   .3141496E-02   .2967050E-02   .2667683E-02
   .2771979E-02   .3226011E-02   .3133014E-02   .1857271E-02   .1269497E-04
  -.8272185E-03  -.1065559E-03   .8252288E-03   .3850030E-03  -.1271969E-02
  -.2491285E-02  -.2277338E-02  -.1068956E-02   .1303188E-03   .2296110E-03
  -.9667341E-03  -.2130548E-02  -.1854481E-02  -.5743885E-03   .2441732E-03
   .2778381E-03   .8649078E-04   .2808637E-04   .1391168E-03   .1333984E-03
  -.3820317E-03  -.1305989E-02  -.2163694E-02  -.2650340E-02  -.2884234E-02
  -.3502001E-02  -.4753618E-02  -.5804409E-02  -.5933766E-02  -.5552653E-02
  -.5366237E-02  -.5365365E-02  -.5209752E-02  -.5177970E-02  -.5907210E-02
  -.7012728E-02  -.6850802E-02  -.5072598E-02  -.3865644E-02  -.4439485E-02
  -.5235765E-02  -.4974007E-02  -.4246271E-02  -.3968278E-02  -.3970029E-02
  -.3769548E-02  -.3751532E-02  -.4157562E-02  -.4477162E-02  -.4387099E-02
  -.4210911E-02  -.4446264E-02  -.4927973E-02  -.4857708E-02  -.3995606E-02
  -.3005064E-02  -.2601755E-02  -.2828964E-02  -.3094383E-02  -.3024981E-02
  -.2805289E-02  -.2706939E-02  -.2764605E-02  -.2853044E-02  -.2796389E-02
  -.2339177E-02  -.1588669E-02  -.1067518E-02  -.7943406E-03  -.4005688E-03
   .8635169E-04   .7529926E-03   .1871300E-02   .2915429E-02   .3252806E-02
   .3517282E-02   .4586724E-02   .5878116E-02   .6275623E-02   .5891859E-02
   .5577760E-02   .5820351E-02   .6477394E-02   .6890661E-02   .6894522E-02
   .7187327E-02   .8248345E-02   .9666791E-02   .1050792E-01   .1022348E-01
   .9392836E-02   .9064084E-02   .9228411E-02   .9002538E-02   .7974929E-02
   .6570928E-02   .5278479E-02   .4102967E-02   .3149900E-02   .2429152E-02
   .1369893E-02  -.2852223E-03  -.2018172E-02  -.3007889E-02  -.2973006E-02
  -.2571547E-02  -.2537129E-02  -.2852394E-02  -.3112814E-02  -.3078075E-02
  -.2611082E-02  -.1808059E-02  -.9141347E-03   .1903949E-04   .6859707E-03
   .8924411E-03   .1359914E-02   .2414066E-02   .3084205E-02   .2670662E-02
   .2013096E-02   .2199610E-02   .3010759E-02   .3640469E-02   .3773252E-02
   .3617867E-02   .3361094E-02   .3009198E-02   .2791106E-02   .2748489E-02
   .2277296E-02   .9123341E-03  -.6572514E-03  -.1238882E-02  -.9283186E-03
  -.8439575E-03  -.1455775E-02  -.2411792E-02  -.3104193E-02  -.3172268E-02
  -.2891383E-02  -.2751746E-02  -.2877661E-02  -.3056020E-02  -.3114550E-02
  -.3084905E-02  -.3050769E-02  -.3028558E-02  -.3035822E-02  -.3058824E-02
  -.3060630E-02  -.3052367E-02  -.3040906E-02  -.3309249E-02  -.4030718E-02
  -.4648585E-02  -.4715673E-02  -.4732279E-02  -.5280212E-02  -.6004992E-02
  -.6530666E-02  -.7039655E-02  -.7533087E-02  -.7944928E-02  -.8105379E-02
  -.7877610E-02  -.7808660E-02  -.8075577E-02  -.7937856E-02  -.7186135E-02
  -.6560680E-02  -.6456707E-02  -.6444531E-02  -.6248682E-02  -.6079784E-02
  -.6092127E-02  -.6045703E-02  -.5568879E-02  -.4834055E-02  -.4478614E-02
  -.4706868E-02  -.5201697E-02  -.5803970E-02  -.6342343E-02  -.6484402E-02
  -.5976586E-02  -.4885187E-02  -.4012133E-02  -.3825219E-02  -.3853021E-02
  -.3745367E-02  -.3371506E-02  -.2659341E-02  -.1800199E-02  -.1104912E-02
  -.7376906E-03  -.5094715E-03  -.2141439E-03  -.8039033E-05  -.9445251E-04
  -.4305411E-03  -.5680711E-03  -.2854642E-03  -.2566781E-03  -.7348799E-03
  -.1082256E-02  -.1006577E-02  -.8084758E-03  -.9057648E-03  -.1655128E-02
  -.2831975E-02  -.3601545E-02  -.3759510E-02  -.3732387E-02  -.3679229E-02
  -.3479349E-02  -.3229016E-02  -.3109834E-02  -.2838691E-02  -.2133279E-02
  -.1337553E-02  -.7612821E-03   .5783267E-04   .1404395E-02   .2640588E-02
   .3299298E-02   .3730619E-02   .4366479E-02   .5341544E-02   .6522909E-02
   .7519813E-02   .8153189E-02   .8683564E-02   .9416730E-02   .1016387E-01
   .1041722E-01   .1004615E-01   .9309556E-02   .8696192E-02   .8419540E-02
   .8239750E-02   .8085784E-02   .7877226E-02   .7657573E-02   .7742636E-02
   .8030710E-02   .8350220E-02   .8655978E-02   .8981705E-02   .9761320E-02
   .1094611E-01   .1172791E-01   .1211766E-01   .1282304E-01   .1370394E-01
   .1452351E-01   .1530442E-01   .1551947E-01   .1509969E-01   .1504297E-01
   .1556483E-01   .1533712E-01   .1384687E-01   .1242029E-01   .1195784E-01
   .1181896E-01   .1121514E-01   .1019438E-01   .9239547E-02   .8575234E-02
   .8007432E-02   .7340872E-02   .6489719E-02   .5491301E-02   .4846551E-02
   .4627455E-02   .4015558E-02   .2863840E-02   .1823282E-02   .1276932E-02
   .1258048E-02   .1310969E-02   .8336140E-03  -.1855125E-04  -.3493185E-03
   .3477147E-03   .1205439E-02   .7685484E-03  -.7060870E-03  -.1504559E-02
  -.1303156E-02  -.1122339E-02  -.1505545E-02  -.2360213E-02  -.2978415E-02
  -.2711204E-02  -.2451146E-02  -.3134400E-02  -.3742759E-02  -.3145869E-02
  -.1880078E-02  -.1161627E-02  -.1327764E-02  -.1459961E-02  -.5854031E-03
   .9366686E-03   .1854951E-02   .2159421E-02   .3000229E-02   .4222036E-02
   .4456156E-02   .3481797E-02   .2743477E-02   .3139434E-02   .3899901E-02
   .4300776E-02   .4398824E-02   .4311328E-02   .4215149E-02   .4194188E-02
   .3989920E-02   .3670753E-02   .3795110E-02   .4340809E-02   .4617965E-02
   .4442560E-02   .4229805E-02   .4228888E-02   .4362750E-02   .4443870E-02
   .4419245E-02   .4370291E-02   .4347507E-02   .4362852E-02   .4316686E-02
   .3897018E-02   .3142994E-02   .2660361E-02   .2756436E-02   .2988666E-02
   .2597487E-02   .1676072E-02   .1131581E-02   .1137286E-02   .1115506E-02
   .8895358E-03   .4949184E-03  -.3354225E-03  -.1348781E-02  -.1736157E-02
  -.1452000E-02  -.1177927E-02  -.1260771E-02  -.1495023E-02  -.1568679E-02
  -.1493064E-02  -.1593494E-02  -.1973288E-02  -.2098983E-02  -.1829774E-02
  -.1795591E-02  -.2085698E-02  -.2263008E-02  -.2029342E-02  -.1505139E-02
  -.1016898E-02  -.6801934E-03  -.7511137E-03  -.1245733E-02  -.1592104E-02
  -.1324789E-02  -.7316083E-03  -.6515118E-03  -.1216224E-02  -.1653874E-02
  -.1548900E-02  -.1257593E-02  -.1419898E-02  -.2436095E-02  -.3824158E-02
  -.4560991E-02  -.4379896E-02  -.4178119E-02  -.4781828E-02  -.5682417E-02
  -.6005105E-02  -.6002533E-02  -.6181163E-02  -.6425879E-02  -.6688942E-02
  -.6784490E-02  -.6564555E-02  -.6585597E-02  -.7017986E-02  -.6989581E-02
  -.5903403E-02  -.4732038E-02  -.4529218E-02  -.4763388E-02  -.4656865E-02
  -.4322429E-02  -.4089642E-02  -.3758183E-02  -.3077828E-02  -.2226360E-02
  -.1567545E-02  -.1180088E-02  -.5331412E-03   .4063164E-03   .7127640E-03
   .2362935E-03  -.1039297E-03  -.3613251E-04  -.7333499E-04  -.2104486E-03
  -.2926569E-04   .3434045E-03   .4629638E-03   .4170528E-03   .7722924E-03
   .1546874E-02   .1994812E-02   .1828934E-02   .1557434E-02   .1663804E-02
   .2306821E-02   .3232721E-02   .4033375E-02   .4526876E-02   .4649033E-02
   .4495872E-02   .4395074E-02   .4497773E-02   .4640356E-02   .4685406E-02
   .4628894E-02   .4380465E-02   .3942467E-02   .3658956E-02   .3378689E-02
   .2745497E-02   .2386827E-02   .2628170E-02   .2592223E-02   .1931624E-02
   .1418484E-02   .1716291E-02   .2420900E-02   .2699687E-02   .2678581E-02
   .2848470E-02   .3079944E-02   .3125021E-02   .3065391E-02   .3293250E-02
   .4243401E-02   .5636728E-02   .6665976E-02   .7147662E-02   .7322302E-02
   .7335958E-02   .7362624E-02   .7466680E-02   .7598772E-02   .7682440E-02
   .7653316E-02   .7256475E-02   .6220945E-02   .5029289E-02   .4461400E-02
   .4103049E-02   .2976680E-02   .1341850E-02  -.1867188E-04  -.8774410E-03
  -.1523312E-02  -.2470378E-02  -.3622221E-02  -.4584569E-02  -.5589767E-02
  -.6914723E-02  -.8059207E-02  -.8498261E-02  -.8601768E-02  -.8745784E-02
  -.8546875E-02  -.7786042E-02  -.6983069E-02  -.6464830E-02  -.5662588E-02
  -.4415379E-02  -.3662779E-02  -.3825058E-02  -.4239525E-02  -.4136152E-02
  -.3474579E-02  -.3118295E-02  -.3588245E-02  -.4172243E-02  -.4333806E-02
  -.4450112E-02  -.4536030E-02  -.4276635E-02  -.3937720E-02  -.3920133E-02
  -.4121202E-02  -.3864867E-02  -.2632174E-02  -.1168687E-02  -.7161563E-03
  -.1194847E-02  -.1578215E-02  -.1438429E-02  -.1102792E-02  -.9756773E-03
  -.1093109E-02  -.1221309E-02  -.1236334E-02  -.1218081E-02  -.1231875E-02
  -.1259151E-02  -.1501444E-02  -.2121466E-02  -.2713446E-02  -.3062892E-02
  -.3521980E-02  -.4074268E-02  -.4321394E-02  -.4202528E-02  -.4037460E-02
  -.4077923E-02  -.4158608E-02  -.3912219E-02  -.3408651E-02  -.2826819E-02
  -.1949739E-02  -.1047922E-02  -.5839784E-03  -.5106027E-03  -.5468576E-03
  -.1922038E-03   .6962275E-03   .1622396E-02   .1991247E-02   .1778853E-02
   .1536073E-02   .1628910E-02   .1781009E-02   .1460141E-02   .6761244E-03
   .1383993E-03   .2359891E-03   .5297659E-03   .4769185E-03  -.1618062E-03
  -.1002223E-02  -.1334635E-02  -.1209829E-02  -.1582226E-02  -.2897309E-02
  -.4190339E-02  -.4556512E-02  -.4667708E-02  -.5615886E-02  -.6905922E-02
  -.7376595E-02  -.7000644E-02  -.6742791E-02  -.7530330E-02  -.9148200E-02
  -.1030423E-01  -.1021842E-01  -.9631443E-02  -.9462528E-02  -.9698498E-02
  -.9955535E-02  -.9988268E-02  -.9709578E-02  -.8881053E-02  -.7638218E-02
  -.6780696E-02  -.6756348E-02  -.7152558E-02  -.7275789E-02  -.7009147E-02
  -.6777580E-02  -.6787664E-02  -.6884263E-02  -.7185313E-02  -.8057939E-02
  -.9295359E-02  -.1001745E-01  -.9868618E-02  -.9490819E-02  -.9529567E-02
  -.1020594E-01  -.1110833E-01  -.1127855E-01  -.1045272E-01  -.9588143E-02
  -.9478438E-02  -.9557717E-02  -.8806064E-02  -.7412562E-02  -.6565745E-02
  -.6561132E-02  -.6569861E-02  -.6034362E-02  -.5241295E-02  -.5100430E-02
  -.6006769E-02  -.7113419E-02  -.7451392E-02  -.7083851E-02  -.6774881E-02
  -.6897453E-02  -.7105801E-02  -.6711869E-02  -.5476694E-02  -.4110392E-02
  -.3205194E-02  -.2459460E-02  -.1585043E-02  -.6205500E-03   .4680249E-03
   .1603386E-02   .2828555E-02   .4033614E-02   .4574635E-02   .4365434E-02
   .4064530E-02   .4130583E-02   .4378868E-02   .4484881E-02   .4416036E-02
   .4118610E-02   .3529358E-02   .2748285E-02   .1993546E-02   .1337106E-02
   .7170773E-03   .3676237E-04  -.7299317E-03  -.1314174E-02  -.1477863E-02
  -.1382680E-02  -.1305561E-02  -.1336486E-02  -.1451060E-02  -.1459015E-02
  -.1138125E-02  -.7059210E-03  -.2962583E-03   .4777868E-03   .1413436E-02
   .1745877E-02   .1434070E-02   .1170310E-02   .1286221E-02   .1562927E-02
   .1945055E-02   .2501135E-02   .2956396E-02   .2989693E-02   .2751074E-02
   .2647796E-02   .2763314E-02   .2601005E-02   .1910808E-02   .1307587E-02
   .1215183E-02   .1173585E-02   .9141228E-03   .6513904E-03   .3502135E-03
  -.2397333E-04  -.5017422E-03  -.1069653E-02  -.1441290E-02  -.1331478E-02
  -.8002939E-03  -.5433151E-03  -.1011767E-02  -.1587445E-02  -.1647552E-02
  -.1382287E-02  -.1074925E-02  -.7593297E-03  -.6782785E-03  -.1120774E-02
  -.1605717E-02  -.1597229E-02  -.1320854E-02  -.1165259E-02  -.1274339E-02
  -.1451482E-02  -.1469903E-02  -.1350543E-02  -.1503458E-02  -.2386898E-02
  -.3538796E-02  -.4049763E-02  -.3937508E-02  -.3756307E-02  -.3728542E-02
  -.3711776E-02  -.3270905E-02  -.2239012E-02  -.1393060E-02  -.1637231E-02
  -.2476931E-02  -.2600828E-02  -.1854308E-02  -.1275324E-02  -.1421522E-02
  -.1829001E-02  -.1965925E-02  -.1795788E-02  -.1328267E-02  -.5921809E-03
   .1894036E-03   .8145010E-03   .1121130E-02   .1077410E-02   .8844374E-03
   .8670525E-03   .1036299E-02   .1110537E-02   .1055190E-02   .9844041E-03
   .9218370E-03   .8999988E-03   .8560038E-03   .5380826E-03   .2156855E-03
   .4471317E-03   .1035918E-02   .1459600E-02   .1683162E-02   .2220277E-02
   .3234341E-02   .3949458E-02   .3836220E-02   .3434932E-02   .3502328E-02
   .4295016E-02   .5008347E-02   .4464736E-02   .3726434E-02   .4744519E-02
   .6638297E-02   .7325816E-02   .6702828E-02   .6085851E-02   .6364876E-02
   .7392987E-02   .8293270E-02   .8572379E-02   .8581264E-02   .8303553E-02
   .7840022E-02   .8185690E-02   .9340751E-02   .9822593E-02   .9107427E-02
   .8600422E-02   .9171355E-02   .9851794E-02   .9651733E-02   .8904381E-02
   .8515877E-02   .8481668E-02   .8105074E-02   .7470506E-02   .7256957E-02
   .7471072E-02   .7582079E-02   .7221353E-02   .6424457E-02   .5836272E-02
   .5801527E-02   .5518737E-02   .4556543E-02   .3791153E-02   .4226908E-02
   .5777510E-02   .7187683E-02   .7417532E-02   .6862673E-02   .6571583E-02
   .6810759E-02   .7159212E-02   .7242796E-02   .7093563E-02   .7076570E-02
   .7441629E-02   .7790880E-02   .7532824E-02   .7006305E-02   .6889976E-02
   .7171578E-02   .7394862E-02   .7338317E-02   .7089764E-02   .6581987E-02
   .5929964E-02   .5648810E-02   .5841783E-02   .5936959E-02   .5373074E-02
   .4472531E-02   .4095098E-02   .4362206E-02   .4496538E-02   .4055690E-02
   .3545841E-02   .3163479E-02   .2609721E-02   .2334484E-02   .2597585E-02
   .2502601E-02   .1611208E-02   .7154461E-03   .7555053E-03   .1505039E-02
   .1689053E-02   .8326204E-03   .6768883E-04   .8996004E-04  -.1156800E-03
  -.9982392E-03  -.1602884E-02  -.1474083E-02  -.1137776E-02  -.1101885E-02
  -.1307991E-02  -.1381932E-02  -.1055095E-02  -.5698388E-03  -.6371534E-03
  -.1267901E-02  -.1621286E-02  -.1419366E-02  -.1178079E-02  -.1516688E-02
  -.2641875E-02  -.3945962E-02  -.4509524E-02  -.4219532E-02  -.3856563E-02
  -.3908378E-02  -.4150208E-02  -.4282480E-02  -.4264514E-02  -.4104696E-02
  -.3739987E-02  -.3442178E-02  -.3282980E-02  -.2682223E-02  -.1664123E-02
  -.1071730E-02  -.1253192E-02  -.1488063E-02  -.1071413E-02  -.6338974E-03
  -.6825618E-03  -.4702964E-03  -.3008311E-04  -.1681847E-03  -.6631568E-03
  -.8147610E-03  -.7408740E-03  -.8262872E-03  -.6709558E-03  -.1600764E-03
  -.9749962E-04  -.6138484E-03  -.7520236E-03   .1352564E-04   .9872355E-03
   .1241902E-02   .8778100E-03   .7814219E-03   .1301988E-02   .1823160E-02
   .1821264E-02   .1566887E-02   .1635844E-02   .2134984E-02   .2354872E-02
   .1906520E-02   .1435483E-02   .1438446E-02   .1443657E-02   .6345426E-03
  -.7988502E-03  -.1672993E-02  -.1506491E-02  -.1037546E-02  -.9718183E-03
  -.1212002E-02  -.1373209E-02  -.1341285E-02  -.1216079E-02  -.1178515E-02
  -.1208401E-02  -.8868335E-03   .1555616E-03   .1464480E-02   .2031177E-02
   .1806444E-02   .2101170E-02   .3619916E-02   .5061688E-02   .5217458E-02
   .4915885E-02   .5318807E-02   .6109399E-02   .6480488E-02   .6571857E-02
   .6690504E-02   .6272250E-02   .5203090E-02   .4399964E-02   .4036609E-02
   .3300830E-02   .2177062E-02   .1568097E-02   .1728779E-02   .2038924E-02
   .2027988E-02   .1797334E-02   .1659181E-02   .1704856E-02   .1794410E-02
   .1883494E-02   .2230045E-02   .2961922E-02   .3826088E-02   .4508959E-02
   .4651228E-02   .4182215E-02   .3755976E-02   .3739534E-02   .3531060E-02
   .2756850E-02   .1889901E-02   .1580779E-02   .1824587E-02   .2045594E-02
   .1970476E-02   .1688442E-02   .1033923E-02  -.1506596E-03  -.1206446E-02
  -.1249446E-02  -.4555296E-03  -.2727910E-04  -.6271874E-03  -.1443825E-02
  -.1544232E-02  -.1148778E-02  -.9299926E-03  -.1031754E-02  -.1205639E-02
  -.1423962E-02  -.1767568E-02  -.2007804E-02  -.1937370E-02  -.1602487E-02
  -.1358395E-02  -.1577258E-02  -.1798495E-02  -.1463957E-02  -.9826130E-03
  -.8994588E-03  -.1081698E-02  -.9607442E-03  -.4571537E-03  -.3666012E-03
  -.8914530E-03  -.1282074E-02  -.1450962E-02  -.2097047E-02  -.3308273E-02
  -.4157607E-02  -.4085819E-02  -.3698571E-02  -.4102727E-02  -.5654672E-02
  -.7138306E-02  -.7335454E-02  -.6715934E-02  -.6664521E-02  -.7678311E-02
  -.8984357E-02  -.9813953E-02  -.9977059E-02  -.9748250E-02  -.9576406E-02
  -.9422524E-02  -.9187211E-02  -.9064947E-02  -.8820706E-02  -.8095723E-02
  -.7177385E-02  -.6691824E-02  -.6800862E-02  -.7050298E-02  -.7032315E-02
  -.6846448E-02  -.6737728E-02  -.6755640E-02  -.6843443E-02  -.6866538E-02
  -.6819099E-02  -.6802143E-02  -.6809271E-02  -.6823758E-02  -.6836439E-02
  -.6771144E-02  -.6285567E-02  -.5151115E-02  -.3982469E-02  -.3637095E-02
  -.4008306E-02  -.4292374E-02  -.4159620E-02  -.3882868E-02  -.3798941E-02
  -.3914593E-02  -.4002899E-02  -.4007495E-02  -.3958791E-02  -.3906425E-02
  -.4031913E-02  -.4652034E-02  -.5758411E-02  -.6341430E-02  -.5762502E-02
  -.4881355E-02  -.4360786E-02  -.4103603E-02  -.4012695E-02  -.4015365E-02
  -.4023501E-02  -.4091781E-02  -.4413845E-02  -.4639141E-02  -.4257188E-02
  -.3702789E-02  -.3738618E-02  -.4611209E-02  -.6126922E-02  -.7845603E-02
  -.8865942E-02  -.8068055E-02  -.5787357E-02  -.4045321E-02  -.4267556E-02
  -.5614508E-02  -.6064358E-02  -.4960359E-02  -.3598765E-02  -.3311172E-02
  -.3871504E-02  -.4261341E-02  -.3952429E-02  -.3267444E-02  -.3076692E-02
  -.3285544E-02  -.2669715E-02  -.1265019E-02  -.5153468E-03  -.8269715E-03
  -.1322104E-02  -.1343260E-02  -.9983822E-03  -.5714622E-03  -.2344735E-03
  -.3917292E-03  -.9846840E-03  -.1319016E-02  -.1175458E-02  -.9022577E-03
  -.4093810E-03   .7386121E-03   .1926525E-02   .2154050E-02   .1688814E-02
   .1680334E-02   .2801534E-02   .4417802E-02   .5219142E-02   .4961392E-02
   .4777096E-02   .5464076E-02   .6645422E-02   .7575744E-02   .7811594E-02
   .7238934E-02   .6094421E-02   .5223360E-02   .5455161E-02   .6051424E-02
   .5682660E-02   .4763969E-02   .4399989E-02   .4679475E-02   .4977412E-02
   .4580577E-02   .3308786E-02   .1921301E-02   .1421303E-02   .1778960E-02
   .2133096E-02   .2042732E-02   .1736175E-02   .1601259E-02   .1614054E-02
   .1314499E-02   .6514079E-03   .8491182E-04  -.2076610E-03  -.3311312E-03
  -.4527239E-03  -.7108108E-03  -.7792990E-03  -.5066604E-03  -.2992114E-03
  -.4372513E-03  -.9162430E-03  -.1348393E-02  -.1349320E-02  -.1113674E-02
  -.1027459E-02  -.1136512E-02  -.1225861E-02  -.1234605E-02  -.1196971E-02
  -.1133277E-02  -.1134690E-02  -.1179502E-02  -.1084068E-02  -.5659648E-03
   .3280076E-03   .1159916E-02   .1765103E-02   .2350857E-02   .3081511E-02
   .4017876E-02   .5056709E-02   .5742070E-02   .6217422E-02   .7035384E-02
   .7855295E-02   .8479848E-02   .9416342E-02   .1044394E-01   .1078932E-01
   .1051903E-01   .1028746E-01   .1040158E-01   .1062841E-01   .1052474E-01
   .9691019E-02   .8338906E-02   .7265685E-02   .6537866E-02   .5699749E-02
   .4569094E-02   .3115079E-02   .1870940E-02   .1345500E-02   .9370392E-03
  -.8393761E-04  -.1210161E-02  -.1502172E-02  -.1152132E-02  -.9364381E-03
  -.1254263E-02  -.2234457E-02  -.3548102E-02  -.4376912E-02  -.4115626E-02
  -.2901191E-02  -.1526656E-02  -.8863902E-03  -.1126000E-02  -.1772982E-02
  -.2192507E-02  -.1853121E-02  -.1349153E-02  -.1733931E-02  -.2636885E-02
  -.2771098E-02  -.1826965E-02  -.8647020E-03  -.7909340E-03  -.1262724E-02
  -.1505161E-02  -.1353980E-02  -.1121304E-02  -.1059448E-02  -.1169071E-02
  -.1264331E-02  -.1222537E-02  -.9386173E-03  -.4841353E-03  -.4580535E-03
  -.9889396E-03  -.1391367E-02  -.1304500E-02  -.1025750E-02  -.9661854E-03
  -.1123052E-02  -.1259444E-02  -.1298964E-02  -.1561043E-02  -.2267051E-02
  -.2825405E-02  -.2542879E-02  -.1902310E-02  -.2260011E-02  -.3656041E-02
  -.4624235E-02  -.4416359E-02  -.3525227E-02  -.2720003E-02  -.2488086E-02
  -.2702979E-02  -.2610274E-02  -.1824621E-02  -.1062428E-02  -.9361294E-03
  -.9594815E-03  -.6827206E-03  -.3267637E-04   .1010324E-02   .1899954E-02
   .2267156E-02   .2303176E-02   .2253301E-02   .2205099E-02   .1977379E-02
   .1653014E-02   .1575860E-02   .1743802E-02   .1687697E-02   .8020442E-03
  -.7138839E-03  -.1627395E-02  -.1402655E-02  -.8781894E-03  -.8305698E-03
  -.1162999E-02  -.1400431E-02  -.1357504E-02  -.1136183E-02  -.7576982E-03
  -.4399455E-03  -.2787811E-03   .3029185E-03   .1328479E-02   .1918736E-02
   .1769825E-02   .1498173E-02   .1523625E-02   .1718648E-02   .1848341E-02
   .1805459E-02   .1682232E-02   .1601200E-02   .1597688E-02   .1637599E-02
   .1652748E-02   .1631268E-02   .1607348E-02   .1598688E-02   .1595504E-02
   .1589043E-02   .1605890E-02   .1489746E-02   .1096164E-02   .8716290E-03
   .1238443E-02   .1860968E-02   .2290336E-02   .2421775E-02   .2326689E-02
   .2228272E-02   .2271563E-02   .2525615E-02   .3138318E-02   .3662396E-02
   .3279856E-02   .2161026E-02   .1331014E-02   .1346875E-02   .1772787E-02
   .1927709E-02   .1721770E-02   .1507499E-02   .1502596E-02   .1615621E-02
   .1679421E-02   .1657454E-02   .1618916E-02   .1612566E-02   .1633378E-02
   .1649957E-02   .1478456E-02   .1082816E-02   .9760991E-03   .1424804E-02
   .1869192E-02   .1836869E-02   .1603297E-02   .1782547E-02   .2568910E-02
   .3555019E-02   .4317813E-02   .4659218E-02   .4604688E-02   .4472869E-02
   .4504827E-02   .4626503E-02   .4721779E-02   .4926798E-02   .5276180E-02
   .5472023E-02   .5375799E-02   .5030605E-02   .4635648E-02   .4508796E-02
   .4666809E-02   .4796325E-02   .4498730E-02   .3709036E-02   .2776003E-02
   .2032609E-02   .1676489E-02   .1713696E-02   .1847912E-02   .1827232E-02
   .1660856E-02   .1279713E-02   .5960093E-03  -.2249372E-03  -.9311339E-03
  -.1257973E-02  -.1186943E-02  -.1052921E-02  -.1124783E-02  -.1580973E-02
  -.2415957E-02  -.3247234E-02  -.3546957E-02  -.3146805E-02  -.2843246E-02
  -.3422945E-02  -.4280388E-02  -.4495538E-02  -.4161972E-02  -.3900736E-02
  -.4023456E-02  -.4419769E-02  -.4875658E-02  -.4659021E-02  -.4045615E-02
  -.4213822E-02  -.5508629E-02  -.6666780E-02  -.6762384E-02  -.6435858E-02
  -.6167121E-02  -.5809185E-02  -.5451013E-02  -.5043611E-02  -.4550455E-02
  -.4456965E-02  -.4844218E-02  -.5083091E-02  -.4842053E-02  -.4307495E-02
  -.3920613E-02  -.3982742E-02  -.4152669E-02  -.3741791E-02  -.2524692E-02
  -.1247263E-02  -.8722768E-03  -.1272492E-02  -.1582595E-02  -.1456305E-02
  -.1070138E-02  -.4720933E-03   .1992661E-03   .4974322E-03   .3442808E-03
   .3313569E-04  -.4398914E-03  -.1008621E-02  -.1368641E-02  -.1734541E-02
  -.2309760E-02  -.2672887E-02  -.2746545E-02  -.2930303E-02  -.3232448E-02
  -.3465133E-02  -.3725515E-02  -.3969041E-02  -.3983874E-02  -.3881938E-02
  -.3857410E-02  -.3543488E-02  -.2395257E-02  -.1170303E-02  -.1285768E-02
  -.2086999E-02  -.1565835E-02   .3280215E-03   .1883788E-02   .2188858E-02
   .1770473E-02   .1505098E-02   .1684303E-02   .1991637E-02   .2079433E-02
   .1969170E-02   .1870492E-02   .1883180E-02   .1950989E-02   .1805630E-02
   .1175887E-02   .2451445E-03  -.1075862E-03   .8216285E-03   .2164882E-02
   .2520216E-02   .1987961E-02   .1995823E-02   .3174100E-02   .4361885E-02
   .4487612E-02   .3982923E-02   .3717713E-02   .3700296E-02   .3777880E-02
   .4018946E-02   .3983354E-02   .3523636E-02   .3408976E-02   .3883927E-02
   .3833104E-02   .2696996E-02   .1605181E-02   .1563667E-02   .2323998E-02
   .2896801E-02   .2527213E-02   .1748421E-02   .1822964E-02   .3118823E-02
   .4614193E-02   .5109242E-02   .4655362E-02   .4214563E-02   .4310110E-02
   .4636217E-02   .4763599E-02   .4664352E-02   .4551733E-02   .4570546E-02
   .4660392E-02   .4696078E-02   .4609737E-02   .4123271E-02   .3046776E-02
   .1981257E-02   .1622866E-02   .1498741E-02   .6706421E-03  -.5597694E-03
  -.1108819E-02  -.8084990E-03  -.4379176E-03  -.4882306E-03  -.7068236E-03
  -.9177929E-03  -.1594579E-02  -.2836336E-02  -.3657891E-02  -.3475138E-02
  -.2978552E-02  -.2879892E-02  -.3114382E-02  -.3296496E-02  -.3261274E-02
  -.3146679E-02  -.2964119E-02  -.2455086E-02  -.1749641E-02  -.1411715E-02
  -.1430637E-02  -.1133948E-02  -.3935534E-03   .1162765E-03   .6934549E-04
  -.1299192E-03  -.1181426E-03  -.2723274E-03  -.1222821E-02  -.2466440E-02
  -.2874540E-02  -.2452209E-02  -.2099521E-02  -.2395254E-02  -.3012773E-02
  -.3075808E-02  -.2498482E-02  -.2077162E-02  -.2162852E-02  -.2206374E-02
  -.1639708E-02  -.6654418E-03   .1339190E-03   .4211389E-03   .3384694E-03
   .4864065E-03   .1171872E-02   .1838718E-02   .1879868E-02   .1305740E-02
   .5587749E-03   .2019456E-03   .3167665E-03   .2759299E-03  -.3877673E-03
  -.1345620E-02  -.2044723E-02  -.2238574E-02  -.2075262E-02  -.1945070E-02
  -.2020583E-02  -.2160923E-02  -.2211330E-02  -.2112327E-02  -.1651777E-02
  -.6579399E-03   .3412970E-03   .7204829E-03   .9389369E-03   .1745818E-02
   .2757526E-02   .3121423E-02   .2862772E-02   .2639507E-02   .2720183E-02
   .2872479E-02   .2901806E-02   .2833419E-02   .2772698E-02   .2762517E-02
   .2778019E-02   .2924438E-02   .3250594E-02   .3470497E-02   .3407562E-02
   .3252726E-02   .3209380E-02   .3109178E-02   .2773352E-02   .2492656E-02
   .2488611E-02   .2588891E-02   .2590299E-02   .2512792E-02   .2438208E-02
   .2021071E-02   .9237886E-03  -.1597379E-03  -.3376172E-03   .9617715E-04
   .3208902E-03   .1333989E-03  -.1409553E-03  -.2147540E-03  -.1195645E-03
  -.4765500E-04  -.5987138E-04  -.1338611E-03  -.3922049E-03  -.9605994E-03
  -.1687613E-02  -.2292670E-02  -.2545656E-02  -.2378598E-02  -.1960073E-02
  -.1748081E-02  -.2091171E-02  -.2587591E-02  -.2667058E-02  -.2416085E-02
  -.2266472E-02  -.2141886E-02  -.1525329E-02  -.8598524E-03  -.1249465E-02
  -.2367578E-02  -.2900953E-02  -.2555852E-02  -.2096433E-02  -.2079028E-02
  -.2329353E-02  -.2465060E-02  -.2263594E-02  -.1713275E-02  -.1021339E-02
  -.4119376E-03  -.1837892E-03  -.4662924E-03  -.6632998E-03  -.1450343E-03
   .6209620E-03   .6560083E-03   .1015875E-04  -.4153150E-03  -.2671379E-03
   .3103200E-04   .8406517E-04  -.5666865E-04  -.1609149E-03  -.1423483E-03
  -.8238924E-04  -.7528223E-04  -.1262383E-03  -.1788001E-03  -.1808605E-03
  -.1453413E-03  -.1368549E-03  -.1661001E-03  -.2107401E-03  -.2564287E-03
  -.2884018E-03  -.2459934E-03   .3797407E-04   .5944411E-03   .1140215E-02
   .1346308E-02   .1298631E-02   .1375890E-02   .1592171E-02   .1678539E-02
   .1603257E-02   .1520636E-02   .1487324E-02   .1558197E-02   .1897072E-02
   .2502454E-02   .3099159E-02   .3389934E-02   .3327988E-02   .3161298E-02
   .3121158E-02   .3175548E-02   .3199169E-02   .3276329E-02   .3497657E-02
   .3788026E-02   .3981491E-02   .3689490E-02   .3003706E-02   .2652485E-02
   .2822283E-02   .3055381E-02   .2996980E-02   .2610986E-02   .2202906E-02
   .2070352E-02   .2012338E-02   .1772184E-02   .1431200E-02   .1400998E-02
   .2023235E-02   .2772248E-02   .2899510E-02   .2548588E-02   .2325081E-02
   .2416693E-02   .2582831E-02   .2607978E-02   .2519478E-02   .2371482E-02
   .2128089E-02   .1950074E-02   .1641422E-02   .7369019E-03   .2700427E-04
   .4586988E-03   .1351471E-02   .1717693E-02   .1514607E-02   .1134716E-02
   .9320165E-03   .1288511E-02   .2089562E-02   .2542403E-02   .2125145E-02
   .1067001E-02   .1697964E-03   .5477558E-04   .4278368E-03   .6153836E-03
   .4410109E-03   .2063860E-03   .1524796E-03   .8864710E-04  -.3590302E-03
  -.9818693E-03  -.1214269E-02  -.1151474E-02  -.1219950E-02  -.1402643E-02
  -.1490994E-02  -.1477577E-02  -.1558912E-02  -.1743810E-02  -.1747949E-02
  -.1648281E-02  -.1706911E-02  -.1815563E-02  -.1812756E-02  -.1782897E-02
  -.1915264E-02  -.1998012E-02  -.1691446E-02  -.1275308E-02  -.1192647E-02
  -.1326283E-02  -.1164797E-02  -.4884428E-03   .2350469E-03   .4310586E-03
   .1903773E-03   .7629982E-05   .7943622E-04   .2302676E-03   .2756702E-03
   .2128627E-03   .1489648E-03   .1480455E-03   .1168235E-03  -.1200732E-03
  -.5548681E-03  -.1004719E-02  -.1301988E-02  -.1350165E-02  -.1320746E-02
  -.1460817E-02  -.1589954E-02  -.1626008E-02  -.1985774E-02  -.2623921E-02
  -.2917538E-02  -.2731322E-02  -.2492855E-02  -.2488830E-02  -.2612500E-02
  -.2671373E-02  -.2846117E-02  -.3390973E-02  -.3952698E-02  -.4032013E-02
  -.3760208E-02  -.3583773E-02  -.3639111E-02  -.3744177E-02  -.3735493E-02
  -.3637981E-02  -.3552273E-02  -.3514800E-02  -.3499975E-02  -.3471326E-02
  -.3425700E-02  -.3361489E-02  -.3187701E-02  -.2836463E-02  -.2411565E-02
  -.2061691E-02  -.1892577E-02  -.1909026E-02  -.1924336E-02  -.1674351E-02
  -.1100103E-02  -.5427520E-03  -.3893005E-03  -.5532112E-03  -.6719544E-03
  -.6021106E-03  -.4703911E-03  -.4221617E-03  -.4543531E-03  -.4864749E-03
  -.4786483E-03  -.4503790E-03  -.4346763E-03  -.4335135E-03  -.4254654E-03
  -.4429879E-03  -.6681990E-03  -.1116312E-02  -.1339382E-02  -.1090819E-02
  -.7700382E-03  -.7518319E-03  -.8745276E-03  -.7542288E-03  -.3956863E-03
  -.2265567E-03  -.4303844E-03  -.6246163E-03  -.4786405E-03  -.2146384E-03
  -.1520101E-03  -.2552937E-03  -.3287670E-03  -.3010199E-03  -.2356271E-03
  -.2083427E-03  -.2220130E-03  -.2351645E-03  -.2282273E-03  -.2169533E-03
  -.2201332E-03  -.1166435E-03   .2021075E-03   .5374935E-03   .6787015E-03
   .6743769E-03   .6544175E-03   .6731404E-03   .7079532E-03   .7217182E-03
   .7043290E-03   .6782991E-03   .6645333E-03   .6575219E-03   .6489360E-03
   .6373523E-03   .6252122E-03   .6142855E-03   .6036206E-03   .5982524E-03
   .5822071E-03   .4776940E-03   .2636090E-03   .9549307E-04   .9949280E-04
   .1720339E-03   .1070013E-03  -.1124228E-03  -.2095138E-03  -.2118190E-04
   .2243044E-03   .3442132E-03   .4107889E-03   .3999004E-03   .2556550E-03
   .1679663E-03   .2379468E-03   .2680642E-03   .1731727E-03   .8890254E-04
   .1185243E-03   .2261629E-03   .2266540E-03   .8638023E-04   .8229683E-04
   .2265126E-03   .1682214E-03  -.1219052E-03  -.3150848E-03  -.2304082E-03
   .7449720E-04   .4074419E-03   .5333044E-03   .4292144E-03   .3649580E-03
   .5608290E-03   .8466536E-03   .9546786E-03   .9160158E-03   .9000667E-03
   .9699008E-03   .1039035E-02   .1050522E-02   .1062463E-02   .1081159E-02
   .1061790E-02   .1013232E-02   .9456680E-03   .8277877E-03   .6925819E-03
   .6302552E-03   .6413255E-03   .6498276E-03   .6191208E-03   .5716944E-03
   .5114151E-03   .4326294E-03   .3781704E-03   .3172169E-03   .1693062E-03
   .8836794E-05  -.3762773E-04   .3218674E-05   .2908869E-04   .3649743E-04
   .5890593E-04   .4284474E-04  -.3088573E-04  -.8515643E-04  -.7801283E-04
  -.4865801E-04  -.7526151E-04  -.1880907E-03  -.3241842E-03  -.3907503E-03
  -.3433525E-03  -.2789443E-03  -.3328077E-03  -.4538788E-03  -.4960309E-03
  -.4088980E-03  -.2433858E-03  -.1301926E-03  -.1405629E-03  -.1729057E-03
  -.1428357E-03  -.9571981E-04  -.8711790E-04  -.1080250E-03  -.1237233E-03
  -.1235103E-03  -.1193783E-03  -.1237000E-03  -.1350072E-03  -.1508028E-03
  -.1821853E-03  -.2173495E-03  -.2445478E-03  -.3049872E-03  -.3875942E-03
  -.4024048E-03  -.3581568E-03  -.3548338E-03  -.4010787E-03  -.4279860E-03
  -.4122391E-03  -.3838508E-03  -.3713518E-03  -.3740856E-03  -.3753072E-03
  -.3757473E-03  -.4109123E-03  -.4875320E-03  -.5247142E-03  -.4758669E-03
  -.4032666E-03  -.3626419E-03  -.3677194E-03  -.3964250E-03  -.3844564E-03
  -.3207308E-03  -.2719238E-03  -.2741843E-03  -.2947887E-03  -.2965025E-03
  -.2798514E-03  -.2657440E-03  -.2717201E-03  -.2941144E-03  -.3067645E-03
  -.2965747E-03  -.2708737E-03  -.2339765E-03  -.1922322E-03  -.1725069E-03
  -.1891143E-03  -.2033325E-03  -.1751628E-03  -.1197660E-03  -.8392848E-04
  -.8934104E-04  -.1111780E-03  -.1094295E-03  -.6757887E-04  -.1914199E-04
  -.1038725E-04  -.3634253E-04  -.6532301E-04  -.8072546E-04  -.8913211E-04
  -.1091868E-03  -.1424268E-03  -.1737245E-03  -.1881828E-03  -.1856846E-03
  -.1879348E-03  -.2089925E-03  -.2304849E-03  -.2311172E-03  -.2196909E-03
  -.2191797E-03  -.2306169E-03  -.2438263E-03  -.2612875E-03  -.2751461E-03
  -.2712389E-03  -.2570912E-03  -.2466925E-03  -.2428399E-03  -.2398415E-03
  -.2331783E-03  -.2265370E-03  -.2293101E-03  -.2429951E-03  -.2502417E-03
  -.2412959E-03  -.2301425E-03  -.2256764E-03  -.2212353E-03  -.2124599E-03
  -.2022341E-03  -.1925353E-03  -.1833920E-03  -.1749761E-03  -.1670876E-03
  -.1593390E-03  -.1510691E-03  -.1425159E-03  -.1344116E-03  -.1266480E-03
  -.1189571E-03  -.1117573E-03  -.1036554E-03  -.9129782E-04  -.7561163E-04
  -.6272291E-04  -.5621164E-04  -.5187628E-04  -.4461415E-04  -.3613053E-04
  -.3033143E-04  -.2706175E-04  -.2391042E-04  -.1860072E-04  -.9970835E-05
  -.6787327E-06   .4359367E-05   .4018128E-05   .1486232E-05   .9895496E-06
   .4746606E-05   .1027518E-04   .1413854E-04   .1619851E-04   .1827665E-04
   .2137117E-04   .2492161E-04   .3021285E-04   .3876677E-04   .4650379E-04
   .4876912E-04   .4774216E-04   .4819970E-04   .5192142E-04   .5776606E-04
   .6194943E-04   .6140283E-04   .5809515E-04   .5698416E-04   .6066888E-04
   .6640343E-04   .6930071E-04   .6869448E-04   .6823199E-04   .6971372E-04
   .7110803E-04   .7120973E-04   .7130034E-04   .7215376E-04   .7333654E-04
   .7429065E-04   .7497157E-04   .7581493E-04   .7689681E-04   .7795413E-04
   .7894603E-04   .7993632E-04   .8101393E-04   .8227392E-04   .8343716E-04
   .8428836E-04   .8535762E-04   .8703731E-04   .8885219E-04   .9027017E-04
   .9145411E-04   .9264140E-04   .9364938E-04   .9484718E-04   .9682936E-04
   .9912874E-04   .1009524E-03   .1022951E-03   .1036621E-03   .1053451E-03
   .1072397E-03   .1091384E-03   .1109078E-03   .1126323E-03   .1143981E-03
   .1161672E-03   .1179344E-03   .1196521E-03   .1213670E-03   .1231718E-03
   .1250455E-03   .1269469E-03   .1288755E-03   .1308191E-03   .1327852E-03
   .1348029E-03   .1368648E-03   .1389727E-03   .1411023E-03   .1432311E-03
   .1453908E-03   .1476027E-03   .1498490E-03   .1521105E-03   .1543846E-03
   .1566718E-03   .1589896E-03   .1613428E-03   .1637174E-03   .1661166E-03
   .1685430E-03   .1709955E-03   .1734782E-03   .1759852E-03   .1785127E-03
   .1810670E-03   .1836485E-03   .1862543E-03   .1888850E-03   .1915410E-03
   .1942230E-03   .1969308E-03   .1996634E-03   .2024214E-03
