# Supplementary material for: Earthquake Response Analysis of Tall Reinforced Concrete Chimneys considering Eccentricity
Source: Hindawi journal article supplement (doi:10.1155/2020/1417969), 2020-03-11
Supplement: f1 [file 1417969.f1.zip › 1417969.f1/Four kinds of earthquake records/Soft rock/LOMAP GGB-UP.txt]

PEER STRONG MOTION DATABASE RECORD. PROCESSING BY PACIFIC ENGINEERING.
LOMA PRIETA 10/18/89 00:05, SF GOLDEN GATE BRIDGE,  UP (USGS STATION 1678)
ACCELERATION TIME HISTORY IN UNITS OF G. FILTER POINTS: HP=0.2 Hz LP=30.0 Hz
NPTS=  7615, DT= .00500 SEC
  -.1852522E-03  -.2240131E-03  -.1655709E-03  -.3332690E-04  -.3996564E-04
  -.2745610E-04  -.1491914E-04  -.4488259E-05   .1997838E-05   .4326903E-05
   .3818580E-05   .2067446E-05  -.1359351E-06  -.2779253E-05  -.5632315E-05
  -.8166628E-05  -.1055549E-04  -.1299648E-04  -.1386343E-04  -.1082089E-04
  -.3020288E-05   .8450225E-05   .2109750E-04   .3325535E-04   .4538543E-04
   .5853256E-04   .7279234E-04   .8754174E-04   .1023309E-03   .1166097E-03
   .1288283E-03   .1364231E-03   .1371098E-03   .1301418E-03   .1163232E-03
   .9821551E-04   .8009115E-04   .6728557E-04   .6503621E-04   .7434766E-04
   .8974353E-04   .1016538E-03   .9909998E-04   .7504714E-04   .3110897E-04
  -.2511255E-04  -.8550393E-04  -.1440856E-03  -.1971634E-03  -.2423975E-03
  -.2764290E-03  -.2945166E-03  -.2940921E-03  -.2768390E-03  -.2469002E-03
  -.2101574E-03  -.1737671E-03  -.1423969E-03  -.1186242E-03  -.1077216E-03
  -.1144187E-03  -.1353062E-03  -.1596085E-03  -.1725721E-03  -.1582074E-03
  -.1066725E-03  -.2259674E-04   .7527059E-04   .1641836E-03   .2279273E-03
   .2627474E-03   .2736958E-03   .2651605E-03   .2395793E-03   .1992824E-03
   .1448971E-03   .8779760E-04   .6777583E-04   .1310237E-03   .2808353E-03
   .4727150E-03   .6517309E-03   .7767702E-03   .8294004E-03   .8146673E-03
   .7497899E-03   .6531770E-03   .5367130E-03   .4009393E-03   .2513096E-03
   .1157008E-03   .2246449E-04  -.2388391E-04  -.3379071E-04  -.2082713E-04
  -.2495030E-05   .3250270E-05  -.1119380E-04  -.4585784E-04  -.8868269E-04
  -.9808445E-04  -.2223857E-04   .1453140E-03   .3375274E-03   .4600261E-03
   .4614890E-03   .3540487E-03   .1830714E-03  -.9442955E-05  -.1922647E-03
  -.3449722E-03  -.4695565E-03  -.5840641E-03  -.6983495E-03  -.7981876E-03
  -.8534974E-03  -.8340022E-03  -.7024279E-03  -.4214614E-03   .1071789E-04
   .5447849E-03   .1083061E-02   .1504842E-02   .1738583E-02   .1810023E-02
   .1794045E-02   .1750509E-02   .1720196E-02   .1708675E-02   .1667622E-02
   .1551266E-02   .1364266E-02   .1141455E-02   .9036028E-03   .6244929E-03
   .2625625E-03  -.1590246E-03  -.5293532E-03  -.7345286E-03  -.7593948E-03
  -.6817304E-03  -.5954406E-03  -.5669155E-03  -.6209175E-03  -.7395512E-03
  -.8851863E-03  -.1016122E-02  -.1093235E-02  -.1112750E-02  -.1126255E-02
  -.1201875E-02  -.1372684E-02  -.1596941E-02  -.1773249E-02  -.1826058E-02
  -.1752454E-02  -.1593983E-02  -.1391810E-02  -.1172739E-02  -.9388417E-03
  -.6486579E-03  -.2292890E-03   .3847356E-03   .1209502E-02   .2233392E-02
   .3446937E-02   .4770650E-02   .6040680E-02   .7089050E-02   .7786147E-02
   .8081614E-02   .8004130E-02   .7601383E-02   .6877211E-02   .5760613E-02
   .4221590E-02   .2431973E-02   .7034599E-03  -.6988003E-03  -.1621039E-02
  -.2020255E-02  -.2002534E-02  -.1825631E-02  -.1793673E-02  -.2106749E-02
  -.2768451E-02  -.3604042E-02  -.4380226E-02  -.4922401E-02  -.5132629E-02
  -.4967424E-02  -.4451712E-02  -.3705434E-02  -.2928504E-02  -.2308844E-02
  -.1930699E-02  -.1765914E-02  -.1708604E-02  -.1663555E-02  -.1637055E-02
  -.1674143E-02  -.1722146E-02  -.1589736E-02  -.1043198E-02   .2176193E-04
   .1490555E-02   .3090355E-02   .4499761E-02   .5418809E-02   .5637359E-02
   .5081698E-02   .3810775E-02   .2035534E-02   .7338477E-04  -.1810385E-02
  -.3466473E-02  -.4822016E-02  -.5867077E-02  -.6609716E-02  -.7018993E-02
  -.7058386E-02  -.6775680E-02  -.6320081E-02  -.5857855E-02  -.5502524E-02
  -.5290380E-02  -.5170078E-02  -.5059622E-02  -.4907742E-02  -.4676035E-02
  -.4368025E-02  -.4073940E-02  -.3869844E-02  -.3680847E-02  -.3297709E-02
  -.2570345E-02  -.1598990E-02  -.6885976E-03  -.1051131E-03   .1303161E-03
   .2650345E-03   .6415859E-03   .1437602E-02   .2502430E-02   .3460431E-02
   .4017804E-02   .4126006E-02   .3870580E-02   .3300386E-02   .2383125E-02
   .1077067E-02  -.5730389E-03  -.2371468E-02  -.3990793E-02  -.5072860E-02
  -.5300919E-02  -.4493790E-02  -.2763699E-02  -.4785147E-03   .2017519E-02
   .4562503E-02   .7060366E-02   .9349263E-02   .1125607E-01   .1273330E-01
   .1386685E-01   .1477794E-01   .1553166E-01   .1609035E-01   .1634722E-01
   .1618698E-01   .1553238E-01   .1435070E-01   .1259287E-01   .1016720E-01
   .7062618E-02   .3464545E-02  -.2804044E-03  -.3757850E-02  -.6619860E-02
  -.8703359E-02  -.1000515E-01  -.1059311E-01  -.1058909E-01  -.1016156E-01
  -.9453319E-02  -.8530085E-02  -.7391261E-02  -.6042432E-02  -.4624783E-02
  -.3410128E-02  -.2604166E-02  -.2199423E-02  -.1980883E-02  -.1596634E-02
  -.6770866E-03   .9360305E-03   .3035114E-02   .5213228E-02   .7131579E-02
   .8557924E-02   .9344584E-02   .9569390E-02   .9570683E-02   .9687316E-02
   .9985596E-02   .1027607E-01   .1031373E-01   .9929077E-02   .9069779E-02
   .7789901E-02   .6181785E-02   .4313012E-02   .2274451E-02   .1948547E-03
  -.1876296E-02  -.3939400E-02  -.5900136E-02  -.7651354E-02  -.9217085E-02
  -.1071436E-01  -.1231661E-01  -.1418999E-01  -.1631191E-01  -.1833570E-01
  -.1963032E-01  -.1955716E-01  -.1789985E-01  -.1507792E-01  -.1189890E-01
  -.9133117E-02  -.7223187E-02  -.6139417E-02  -.5455616E-02  -.4610989E-02
  -.3270052E-02  -.1633937E-02  -.2974071E-03   .1993735E-03  -.3811989E-03
  -.2031449E-02  -.4655387E-02  -.8031884E-02  -.1162837E-01  -.1468798E-01
  -.1656606E-01  -.1688328E-01  -.1547360E-01  -.1232231E-01  -.7656245E-02
  -.2180666E-02   .2973404E-02   .6806401E-02   .8955813E-02   .9697560E-02
   .9589814E-02   .9105646E-02   .8496503E-02   .7834669E-02   .7102277E-02
   .6295493E-02   .5557123E-02   .5159495E-02   .5230595E-02   .5618463E-02
   .6094581E-02   .6573009E-02   .7122495E-02   .7830802E-02   .8632349E-02
   .9286001E-02   .9574563E-02   .9486468E-02   .9212952E-02   .8941195E-02
   .8625370E-02   .7991325E-02   .6781833E-02   .4997352E-02   .2859497E-02
   .6590145E-03  -.1327990E-02  -.2929113E-02  -.4054204E-02  -.4580056E-02
  -.4320807E-02  -.3164705E-02  -.1304431E-02   .6989619E-03   .2048505E-02
   .1977626E-02   .1839954E-03  -.2951422E-02  -.6716453E-02  -.1040702E-01
  -.1328574E-01  -.1466622E-01  -.1423557E-01  -.1220157E-01  -.9107142E-02
  -.5516261E-02  -.1863658E-02   .1457436E-02   .4003325E-02   .5377793E-02
   .5444338E-02   .4419714E-02   .2751983E-02   .8927143E-03  -.8608661E-03
  -.2406098E-02  -.3779463E-02  -.4988326E-02  -.5886384E-02  -.6252924E-02
  -.5876599E-02  -.4652913E-02  -.2859129E-02  -.1114034E-02   .1205178E-03
   .7784048E-03   .1027220E-02   .1094531E-02   .1180146E-02   .1394920E-02
   .1669409E-02   .1775394E-02   .1510234E-02   .8570683E-03   .4304480E-04
  -.5395403E-03  -.5834886E-03  -.9737530E-04   .5935928E-03   .1051628E-02
   .1008056E-02   .5100834E-03  -.1969093E-03  -.8248270E-03  -.1069245E-02
  -.6843497E-03   .3744818E-03   .1901767E-02   .3553209E-02   .5014611E-02
   .6108002E-02   .6828531E-02   .7294893E-02   .7607623E-02   .7743818E-02
   .7540317E-02   .6788450E-02   .5544266E-02   .4246786E-02   .3429035E-02
   .3444561E-02   .4350152E-02   .5884840E-02   .7554156E-02   .8860782E-02
   .9558669E-02   .9657677E-02   .9267434E-02   .8538756E-02   .7607083E-02
   .6528246E-02   .5364842E-02   .4225342E-02   .3166990E-02   .2169501E-02
   .1218773E-02   .4014244E-03  -.1098389E-03  -.2448019E-03  -.1945358E-03
  -.2817269E-03  -.6490908E-03  -.1161374E-02  -.1624559E-02  -.1982653E-02
  -.2315431E-02  -.2742393E-02  -.3381672E-02  -.4342561E-02  -.5723328E-02
  -.7586636E-02  -.9801106E-02  -.1194718E-01  -.1348263E-01  -.1401383E-01
  -.1343372E-01  -.1186642E-01  -.9593241E-02  -.7051404E-02  -.4685920E-02
  -.2743707E-02  -.1255626E-02  -.6982422E-04   .1094343E-02   .2404174E-02
   .3726452E-02   .4796499E-02   .5463717E-02   .5713888E-02   .5424009E-02
   .4267030E-02   .2023077E-02  -.1221008E-02  -.5091802E-02  -.8941631E-02
  -.1205723E-01  -.1411669E-01  -.1541524E-01  -.1655550E-01  -.1795562E-01
  -.1955127E-01  -.2078268E-01  -.2093681E-01  -.1966943E-01  -.1728832E-01
  -.1458817E-01  -.1237891E-01  -.1107939E-01  -.1066630E-01  -.1086608E-01
  -.1130814E-01  -.1163752E-01  -.1164704E-01  -.1127405E-01  -.1049996E-01
  -.9321491E-02  -.7722696E-02  -.5648382E-02  -.3095979E-02  -.2016907E-03
   .2826868E-02   .5798463E-02   .8481157E-02   .1055412E-01   .1179332E-01
   .1225631E-01   .1219063E-01   .1181487E-01   .1123405E-01   .1050112E-01
   .9711561E-02   .9070780E-02   .8800152E-02   .8970451E-02   .9479189E-02
   .1008870E-01   .1041898E-01   .1014614E-01   .9275191E-02   .7985414E-02
   .6363710E-02   .4393914E-02   .2096563E-02  -.2701802E-03  -.2274376E-02
  -.3618408E-02  -.4294335E-02  -.4475126E-02  -.4313675E-02  -.3962161E-02
  -.3591495E-02  -.3295853E-02  -.3115647E-02  -.3078383E-02  -.3188692E-02
  -.3385660E-02  -.3547579E-02  -.3498370E-02  -.2994029E-02  -.1781263E-02
   .2522198E-03   .2920013E-02   .5827961E-02   .8591395E-02   .1097186E-01
   .1297283E-01   .1477282E-01   .1651727E-01   .1822710E-01   .1967276E-01
   .2021204E-01   .1910306E-01   .1616113E-01   .1197165E-01   .7484910E-02
   .3521741E-02   .4602775E-03  -.1744482E-02  -.3304056E-02  -.4338630E-02
  -.4856787E-02  -.5010211E-02  -.5280949E-02  -.6476332E-02  -.9449064E-02
  -.1452467E-01  -.2104827E-01  -.2761267E-01  -.3257099E-01  -.3437337E-01
  -.3212892E-01  -.2621468E-01  -.1837957E-01  -.1103653E-01  -.5927633E-02
  -.3334016E-02  -.2360012E-02  -.1680842E-02  -.4157705E-03   .1453005E-02
   .3526464E-02   .5492775E-02   .7328508E-02   .9245791E-02   .1127447E-01
   .1298114E-01   .1373081E-01   .1325387E-01   .1183088E-01   .1011077E-01
   .8781326E-02   .8135872E-02   .7973874E-02   .7917601E-02   .7703191E-02
   .7195128E-02   .6436075E-02   .5563239E-02   .4631290E-02   .3586097E-02
   .2310556E-02   .7760276E-03  -.7803263E-03  -.1795903E-02  -.1717289E-02
  -.5109611E-03   .1160751E-02   .2444096E-02   .2901386E-02   .2667370E-02
   .2444293E-02   .3025571E-02   .4677954E-02   .6863905E-02   .8578759E-02
   .9177824E-02   .8705586E-02   .7818945E-02   .7443449E-02   .8141990E-02
   .9730529E-02   .1151512E-01   .1286194E-01   .1339880E-01   .1296086E-01
   .1153877E-01   .9282548E-02   .6532653E-02   .3778691E-02   .1656370E-02
   .7047560E-03   .1007367E-02   .2058377E-02   .3048303E-02   .3413186E-02
   .3023769E-02   .2082671E-02   .9620139E-03   .7405111E-04  -.1505131E-03
   .6489859E-03   .2492482E-02   .5024894E-02   .7758389E-02   .1017566E-01
   .1182832E-01   .1237352E-01   .1168680E-01   .9938739E-02   .7518002E-02
   .4923814E-02   .2572795E-02   .6163961E-03  -.1006515E-02  -.2284669E-02
  -.3127918E-02  -.3461602E-02  -.3156480E-02  -.2162975E-02  -.7372249E-03
   .6538070E-03   .1491362E-02   .1526126E-02   .9339934E-03  -.9507183E-05
  -.1129094E-02  -.2409169E-02  -.3867373E-02  -.5348299E-02  -.6595356E-02
  -.7274883E-02  -.7078525E-02  -.6033874E-02  -.4528596E-02  -.3104437E-02
  -.2153589E-02  -.1838331E-02  -.2016133E-02  -.2085276E-02  -.1521615E-02
  -.2177900E-03   .1691750E-02   .3904891E-02   .6188056E-02   .8358160E-02
   .1019665E-01   .1158366E-01   .1237804E-01   .1247758E-01   .1199236E-01
   .1103564E-01   .9755427E-02   .8401331E-02   .7181504E-02   .6292539E-02
   .5819946E-02   .5591110E-02   .5280483E-02   .4662026E-02   .3674008E-02
   .2371227E-02   .8481184E-03  -.7588971E-03  -.2184121E-02  -.3215697E-02
  -.3719488E-02  -.3699312E-02  -.3539486E-02  -.3713744E-02  -.4307838E-02
  -.4898733E-02  -.4902263E-02  -.3886087E-02  -.1767332E-02   .1097806E-02
   .4051832E-02   .6397934E-02   .7778835E-02   .8287255E-02   .8232411E-02
   .7816661E-02   .7096412E-02   .5978558E-02   .4467730E-02   .2777101E-02
   .1114325E-02  -.2718503E-03  -.1297170E-02  -.2153175E-02  -.2979810E-02
  -.3759086E-02  -.4425563E-02  -.4872918E-02  -.5045479E-02  -.5067600E-02
  -.5230668E-02  -.5970743E-02  -.7761774E-02  -.1076156E-01  -.1454265E-01
  -.1822750E-01  -.2088799E-01  -.2192543E-01  -.2124094E-01  -.1918446E-01
  -.1644938E-01  -.1381130E-01  -.1171970E-01  -.1019305E-01  -.9058212E-02
  -.8117245E-02  -.7280295E-02  -.6605278E-02  -.6089699E-02  -.5611130E-02
  -.5037532E-02  -.4243202E-02  -.3078883E-02  -.1550375E-02   .1590740E-03
   .1853869E-02   .3368038E-02   .4662270E-02   .5768191E-02   .6637124E-02
   .7155348E-02   .7247003E-02   .6980770E-02   .6581579E-02   .6345552E-02
   .6346529E-02   .6196278E-02   .5392643E-02   .3774239E-02   .1668977E-02
  -.2722244E-03  -.1516925E-02  -.1888224E-02  -.1484033E-02  -.6589030E-03
   .1646635E-03   .7574755E-03   .1018817E-02   .1047025E-02   .9623517E-03
   .7615237E-03   .4288027E-03  -.1714501E-04  -.3571061E-03  -.3800713E-03
  -.9133550E-04   .3826021E-03   .9492728E-03   .1608547E-02   .2426221E-02
   .3478235E-02   .4738906E-02   .6038361E-02   .7093942E-02   .7651383E-02
   .7649713E-02   .7273562E-02   .6834784E-02   .6604886E-02   .6683748E-02
   .6969958E-02   .7248393E-02   .7247262E-02   .6801690E-02   .5979388E-02
   .5018445E-02   .4235078E-02   .3915739E-02   .4158164E-02   .4776633E-02
   .5541171E-02   .6306383E-02   .6992881E-02   .7475102E-02   .7423192E-02
   .6568591E-02   .4952397E-02   .2893662E-02   .8208433E-03  -.9143780E-03
  -.2104965E-02  -.2829232E-02  -.3507699E-02  -.4587254E-02  -.6129456E-02
  -.7718933E-02  -.8794739E-02  -.9015793E-02  -.8400957E-02  -.7229750E-02
  -.5858577E-02  -.4518073E-02  -.3244736E-02  -.2045848E-02  -.9244148E-03
   .4932863E-04   .7427833E-03   .1051572E-02   .9394513E-03   .5872778E-03
   .3993950E-03   .7114662E-03   .1515141E-02   .2511838E-02   .3224761E-02
   .3244121E-02   .2506369E-02   .1347742E-02   .3314916E-03  -.8324934E-04
   .1679636E-03   .7865362E-03   .1365480E-02   .1593739E-02   .1450532E-02
   .1047806E-02   .3862757E-03  -.6391453E-03  -.2221730E-02  -.4548158E-02
  -.7535006E-02  -.1063707E-01  -.1304521E-01  -.1409095E-01  -.1360128E-01
  -.1193377E-01  -.9680707E-02  -.7410959E-02  -.5521812E-02  -.4263829E-02
  -.3650368E-02  -.3327856E-02  -.2894257E-02  -.2239630E-02  -.1535073E-02
  -.1080961E-02  -.1020307E-02  -.1275664E-02  -.1782297E-02  -.2463374E-02
  -.3186549E-02  -.3727139E-02  -.3762226E-02  -.3082653E-02  -.1754265E-02
  -.1477041E-03   .1144675E-02   .1613821E-02   .1185865E-02   .1471290E-03
  -.1059303E-02  -.1945333E-02  -.2161138E-02  -.1754755E-02  -.1256349E-02
  -.1240984E-02  -.1906136E-02  -.3061757E-02  -.4336948E-02  -.5359680E-02
  -.5759678E-02  -.5137818E-02  -.3293286E-02  -.5567234E-03   .2492823E-02
   .5387637E-02   .7804977E-02   .9752278E-02   .1134736E-01   .1251860E-01
   .1311033E-01   .1285708E-01   .1143492E-01   .8886334E-02   .5718408E-02
   .2534194E-02  -.1049002E-03  -.1856329E-02  -.2803359E-02  -.3205580E-02
  -.3320212E-02  -.3429455E-02  -.3701059E-02  -.4104248E-02  -.4480768E-02
  -.4793348E-02  -.5177395E-02  -.5694354E-02  -.6316616E-02  -.6934862E-02
  -.7281420E-02  -.6940783E-02  -.5606522E-02  -.3433671E-02  -.1090160E-02
   .6074727E-03   .1340325E-02   .1370933E-02   .1129422E-02   .1043252E-02
   .1354794E-02   .1952055E-02   .2543380E-02   .2777345E-02   .2282381E-02
   .9387661E-03  -.1114872E-02  -.3588754E-02  -.6062074E-02  -.8175875E-02
  -.9764416E-02  -.1085305E-01  -.1148734E-01  -.1163103E-01  -.1127364E-01
  -.1058195E-01  -.9914524E-02  -.9480731E-02  -.9155821E-02  -.8573870E-02
  -.7414020E-02  -.5775171E-02  -.4109228E-02  -.2867364E-02  -.2186338E-02
  -.1847710E-02  -.1563022E-02  -.1290931E-02  -.1224087E-02  -.1607664E-02
  -.2610054E-02  -.4348196E-02  -.6796406E-02  -.9690053E-02  -.1257329E-01
  -.1478257E-01  -.1584373E-01  -.1584160E-01  -.1532653E-01  -.1475541E-01
  -.1415428E-01  -.1344827E-01  -.1257087E-01  -.1148492E-01  -.1020280E-01
  -.8640783E-02  -.6621157E-02  -.4053710E-02  -.1056347E-02   .2141464E-02
   .5318795E-02   .8259153E-02   .1058770E-01   .1193074E-01   .1221319E-01
   .1157652E-01   .1031226E-01   .8610550E-02   .6360100E-02   .3597593E-02
   .8953596E-03  -.9959627E-03  -.1754803E-02  -.1703245E-02  -.1507701E-02
  -.1653669E-02  -.2325876E-02  -.3325494E-02  -.4017877E-02  -.3675249E-02
  -.1932877E-02   .8516146E-03   .3853149E-02   .6396213E-02   .8341254E-02
   .9914196E-02   .1124566E-01   .1227115E-01   .1286645E-01   .1300800E-01
   .1280296E-01   .1238333E-01   .1183003E-01   .1107433E-01   .9944736E-02
   .8454788E-02   .6890952E-02   .5608762E-02   .4874810E-02   .4736716E-02
   .4997629E-02   .5324286E-02   .5395167E-02   .5092476E-02   .4528758E-02
   .3943535E-02   .3529440E-02   .3203468E-02   .2777108E-02   .2358950E-02
   .2382962E-02   .3131286E-02   .4376324E-02   .5596784E-02   .6418128E-02
   .6804354E-02   .6838666E-02   .6660013E-02   .6472537E-02   .6435777E-02
   .6607605E-02   .6910635E-02   .7140168E-02   .6907790E-02   .5670189E-02
   .3139325E-02  -.2711081E-03  -.3594699E-02  -.5971533E-02  -.7243903E-02
  -.7760961E-02  -.7867829E-02  -.7781722E-02  -.7640118E-02  -.7576339E-02
  -.7523132E-02  -.7119502E-02  -.6119733E-02  -.4747842E-02  -.3375342E-02
  -.2146055E-02  -.1119762E-02  -.3325688E-03   .2062841E-03   .5268515E-03
   .7581456E-03   .9991147E-03   .1256371E-02   .1505027E-02   .1742891E-02
   .2069100E-02   .2631881E-02   .3559858E-02   .4745299E-02   .5884424E-02
   .6789458E-02   .7277285E-02   .7100164E-02   .6039599E-02   .4114310E-02
   .1666677E-02  -.7912808E-03  -.2690558E-02  -.3673202E-02  -.3742517E-02
  -.3123322E-02  -.2146387E-02  -.1150908E-02  -.4395789E-03  -.2754788E-03
  -.6678734E-03  -.1266716E-02  -.1639412E-02  -.1562468E-02  -.1073913E-02
  -.3288590E-03   .4934309E-03   .1202390E-02   .1688951E-02   .2050290E-02
   .2529340E-02   .3257651E-02   .4056666E-02   .4415544E-02   .3827108E-02
   .2041781E-02  -.8469031E-03  -.4250973E-02  -.7293133E-02  -.9169683E-02
  -.9457747E-02  -.8305485E-02  -.6364418E-02  -.4472299E-02  -.3272328E-02
  -.2934275E-02  -.3097293E-02  -.3227579E-02  -.2934828E-02  -.1985488E-02
  -.4063133E-03   .1575918E-02   .3731305E-02   .5790199E-02   .7406953E-02
   .8285776E-02   .8350131E-02   .7717158E-02   .6628994E-02   .5352418E-02
   .4040307E-02   .2808059E-02   .1811373E-02   .1097877E-02   .5051646E-03
  -.2190153E-03  -.1192510E-02  -.2223014E-02  -.2994098E-02  -.3262664E-02
  -.2865403E-02  -.1879553E-02  -.6386970E-03   .3228893E-03   .5843700E-03
   .2106607E-03  -.5553032E-03  -.1459078E-02  -.2147130E-02  -.2217293E-02
  -.1387488E-02   .2212830E-03   .2138159E-02   .3805411E-02   .4794436E-02
   .5076471E-02   .5014934E-02   .5016716E-02   .5186740E-02   .5238707E-02
   .4850223E-02   .3991817E-02   .2925758E-02   .1994123E-02   .1417558E-02
   .1189167E-02   .1078022E-02   .7905876E-03   .1859339E-03  -.6367299E-03
  -.1462712E-02  -.2011313E-02  -.1951907E-02  -.1049317E-02   .6111470E-03
   .2569460E-02   .4264586E-02   .5322536E-02   .5668280E-02   .5421364E-02
   .4720276E-02   .3727573E-02   .2616033E-02   .1635962E-02   .1103875E-02
   .1144753E-02   .1607995E-02   .2177643E-02   .2512972E-02   .2286735E-02
   .1313906E-02  -.2189665E-03  -.1836059E-02  -.3060379E-02  -.3576659E-02
  -.3350265E-02  -.2615548E-02  -.1682589E-02  -.7931685E-03  -.6420687E-04
   .5905385E-03   .1280833E-02   .1950340E-02   .2505776E-02   .2845863E-02
   .2840581E-02   .2394738E-02   .1530903E-02   .4668673E-03  -.3681874E-03
  -.4983934E-03   .3594392E-03   .2077803E-02   .4107264E-02   .5814885E-02
   .6852544E-02   .7237265E-02   .7155771E-02   .6747783E-02   .6027754E-02
   .5034772E-02   .3948500E-02   .2989813E-02   .2252800E-02   .1725185E-02
   .1403048E-02   .1198840E-02   .9137381E-03   .3279839E-03  -.7309566E-03
  -.2288336E-02  -.4174367E-02  -.6113860E-02  -.7878062E-02  -.9348467E-02
  -.1051360E-01  -.1148082E-01  -.1235678E-01  -.1296579E-01  -.1284078E-01
  -.1160459E-01  -.9283340E-02  -.6316762E-02  -.3381708E-02  -.1060777E-02
   .3948412E-03   .1058649E-02   .1311379E-02   .1556249E-02   .1846024E-02
   .2067127E-02   .2123063E-02   .1932061E-02   .1576557E-02   .1155483E-02
   .7235008E-03   .4257500E-03   .3849605E-03   .6090282E-03   .1002512E-02
   .1429248E-02   .1870039E-02   .2422272E-02   .3084734E-02   .3761544E-02
   .4238387E-02   .4203310E-02   .3569837E-02   .2435676E-02   .9539720E-03
  -.5977923E-03  -.2005285E-02  -.3183982E-02  -.4074265E-02  -.4559166E-02
  -.4450747E-02  -.3708120E-02  -.2561392E-02  -.1505595E-02  -.1043234E-02
  -.1377138E-02  -.2367121E-02  -.3580966E-02  -.4542964E-02  -.5076124E-02
  -.5370532E-02  -.5626276E-02  -.5893512E-02  -.6127333E-02  -.6195127E-02
  -.6046264E-02  -.5715276E-02  -.5268610E-02  -.4805286E-02  -.4395734E-02
  -.4086637E-02  -.3867749E-02  -.3650686E-02  -.3319209E-02  -.2800864E-02
  -.2083111E-02  -.1179469E-02  -.1188161E-03   .1036116E-02   .2127451E-02
   .2949761E-02   .3363802E-02   .3417358E-02   .3259370E-02   .2920386E-02
   .2357996E-02   .1538376E-02   .4841081E-03  -.6408619E-03  -.1623738E-02
  -.2357873E-02  -.2695118E-02  -.2389665E-02  -.1359848E-02   .1655114E-03
   .1732389E-02   .2890156E-02   .3366139E-02   .3156673E-02   .2472817E-02
   .1570715E-02   .6512133E-03  -.1528115E-03  -.7755724E-03  -.1304814E-02
  -.1888774E-02  -.2594995E-02  -.3422176E-02  -.4165088E-02  -.4483497E-02
  -.4247057E-02  -.3535211E-02  -.2630523E-02  -.2059149E-02  -.2088597E-02
  -.2522887E-02  -.2958156E-02  -.3078219E-02  -.2864445E-02  -.2492042E-02
  -.2210537E-02  -.2198433E-02  -.2528336E-02  -.3197123E-02  -.4126007E-02
  -.5187532E-02  -.6172149E-02  -.6903534E-02  -.7303595E-02  -.7311554E-02
  -.7006998E-02  -.6566950E-02  -.6056503E-02  -.5425332E-02  -.4644943E-02
  -.3749116E-02  -.2852938E-02  -.2186186E-02  -.1877642E-02  -.1937642E-02
  -.2235122E-02  -.2542714E-02  -.2747618E-02  -.2769202E-02  -.2513589E-02
  -.1866471E-02  -.8525034E-03   .3634962E-03   .1526162E-02   .2375881E-02
   .2960262E-02   .3452752E-02   .3904921E-02   .4279113E-02   .4515384E-02
   .4588740E-02   .4535480E-02   .4403954E-02   .4238149E-02   .4047879E-02
   .3772711E-02   .3384817E-02   .2887605E-02   .2221098E-02   .1329297E-02
   .4326719E-03  -.5472107E-04   .1455607E-03   .1100871E-02   .2663890E-02
   .4603958E-02   .6695012E-02   .8686214E-02   .1039162E-01   .1180612E-01
   .1291295E-01   .1366373E-01   .1412606E-01   .1430224E-01   .1406320E-01
   .1333557E-01   .1229807E-01   .1125540E-01   .1043529E-01   .9880238E-02
   .9294953E-02   .8333642E-02   .6927689E-02   .5133243E-02   .3056667E-02
   .7258404E-03  -.1861024E-02  -.4552788E-02  -.7058097E-02  -.8968076E-02
  -.1001694E-01  -.1028789E-01  -.1001620E-01  -.9514473E-02  -.9157776E-02
  -.9052966E-02  -.9031243E-02  -.8763303E-02  -.8024288E-02  -.6879010E-02
  -.5463706E-02  -.3979157E-02  -.2617712E-02  -.1568298E-02  -.1023150E-02
  -.9501697E-03  -.1132156E-02  -.1374378E-02  -.1608568E-02  -.1911178E-02
  -.2254919E-02  -.2356029E-02  -.2091673E-02  -.1620315E-02  -.1272786E-02
  -.1409896E-02  -.2155794E-02  -.3370112E-02  -.4779381E-02  -.6220396E-02
  -.7470191E-02  -.8258131E-02  -.8493047E-02  -.8196034E-02  -.7610311E-02
  -.7014427E-02  -.6462889E-02  -.5930160E-02  -.5450849E-02  -.5087054E-02
  -.4832388E-02  -.4633583E-02  -.4415014E-02  -.4184393E-02  -.4112495E-02
  -.4353687E-02  -.4942405E-02  -.5681559E-02  -.6232807E-02  -.6447203E-02
  -.6397270E-02  -.6278026E-02  -.6150893E-02  -.5876006E-02  -.5321432E-02
  -.4444824E-02  -.3388979E-02  -.2326429E-02  -.1326017E-02  -.4076363E-03
   .3757309E-03   .1026166E-02   .1664267E-02   .2394378E-02   .3425010E-02
   .4931217E-02   .6765019E-02   .8469744E-02   .9500793E-02   .9475936E-02
   .8376843E-02   .6610653E-02   .4737458E-02   .3210328E-02   .2265063E-02
   .1799419E-02   .1584642E-02   .1551434E-02   .1645747E-02   .1733499E-02
   .1701469E-02   .1521401E-02   .1285615E-02   .1205883E-02   .1417799E-02
   .1840528E-02   .2338627E-02   .2838543E-02   .3300594E-02   .3624342E-02
   .3686767E-02   .3492259E-02   .3175969E-02   .2962411E-02   .3084205E-02
   .3567647E-02   .4216583E-02   .4710184E-02   .4689221E-02   .4024924E-02
   .2903056E-02   .1674469E-02   .7455271E-03   .3731448E-03   .5164291E-03
   .9874839E-03   .1590598E-02   .2147934E-02   .2521477E-02   .2658392E-02
   .2704785E-02   .2906491E-02   .3283834E-02   .3642637E-02   .3808394E-02
   .3806939E-02   .3915718E-02   .4426099E-02   .5339784E-02   .6452565E-02
   .7555396E-02   .8402915E-02   .8841920E-02   .8807232E-02   .8253763E-02
   .7203725E-02   .5738887E-02   .3922545E-02   .1856860E-02  -.2267492E-03
  -.2033738E-02  -.3268094E-02  -.3915772E-02  -.4205822E-02  -.4323395E-02
  -.4354905E-02  -.4309799E-02  -.4213298E-02  -.4114574E-02  -.4088091E-02
  -.4269936E-02  -.4774880E-02  -.5623875E-02  -.6621678E-02  -.7370504E-02
  -.7528203E-02  -.6980786E-02  -.5978798E-02  -.4911333E-02  -.3961360E-02
  -.3194443E-02  -.2611005E-02  -.2098955E-02  -.1453538E-02  -.5409409E-03
   .5834337E-03   .1774747E-02   .2836676E-02   .3607881E-02   .3968650E-02
   .3827914E-02   .3241811E-02   .2402700E-02   .1557335E-02   .9552836E-03
   .8312547E-03   .1370090E-02   .2642930E-02   .4421774E-02   .6200584E-02
   .7491828E-02   .8013298E-02   .7774257E-02   .6965497E-02   .5815891E-02
   .4567457E-02   .3415300E-02   .2518601E-02   .1972700E-02   .1648446E-02
   .1263891E-02   .6683803E-03  -.1603645E-04  -.4847221E-03  -.5047233E-03
  -.4737237E-04   .7855961E-03   .1669234E-02   .2056162E-02   .1536221E-02
   .1866630E-03  -.1407390E-02  -.2523317E-02  -.2766643E-02  -.2302727E-02
  -.1609125E-02  -.1044264E-02  -.7542105E-03  -.6671611E-03  -.5293444E-03
  -.1487829E-03   .4869805E-03   .1233408E-02   .1833822E-02   .2050346E-02
   .1827866E-02   .1314356E-02   .6819149E-03   .2658263E-04  -.6092663E-03
  -.1203428E-02  -.1753309E-02  -.2303956E-02  -.2871087E-02  -.3478126E-02
  -.4110690E-02  -.4609899E-02  -.4880232E-02  -.4981998E-02  -.5042633E-02
  -.5274476E-02  -.5808173E-02  -.6521033E-02  -.7157926E-02  -.7501279E-02
  -.7535594E-02  -.7358039E-02  -.7098931E-02  -.6910529E-02  -.6863345E-02
  -.6898689E-02  -.6958450E-02  -.7085232E-02  -.7397459E-02  -.8027375E-02
  -.8829702E-02  -.9471731E-02  -.9625519E-02  -.9035809E-02  -.7801794E-02
  -.6323570E-02  -.5040914E-02  -.4200482E-02  -.3733031E-02  -.3404211E-02
  -.2951427E-02  -.2143932E-02  -.9303496E-03   .5660635E-03   .2309640E-02
   .4247985E-02   .6200953E-02   .7932017E-02   .9102657E-02   .9555240E-02
   .9378158E-02   .8783479E-02   .8076232E-02   .7452727E-02   .7033401E-02
   .6947028E-02   .7159156E-02   .7456593E-02   .7588243E-02   .7409786E-02
   .6987582E-02   .6422805E-02   .5801303E-02   .5190325E-02   .4595970E-02
   .4021448E-02   .3471085E-02   .3002510E-02   .2706897E-02   .2579020E-02
   .2452865E-02   .2097488E-02   .1332713E-02   .2659154E-03  -.7693299E-03
  -.1531143E-02  -.1921449E-02  -.2023046E-02  -.1861101E-02  -.1351287E-02
  -.6486788E-03  -.6971625E-04   .1418649E-03  -.2660177E-04  -.2778528E-03
  -.3630711E-03  -.2987716E-03  -.1807763E-03  -.1857336E-03  -.5073131E-03
  -.1124646E-02  -.1842400E-02  -.2474855E-02  -.2892645E-02  -.3058183E-02
  -.2995597E-02  -.2700388E-02  -.2207585E-02  -.1620732E-02  -.1015407E-02
  -.4181396E-03   .1679537E-03   .7563425E-03   .1325153E-02   .1823862E-02
   .2250144E-02   .2689630E-02   .3252391E-02   .4016331E-02   .4957671E-02
   .5894108E-02   .6640860E-02   .7062185E-02   .7086568E-02   .6701268E-02
   .5875112E-02   .4609807E-02   .3034126E-02   .1381613E-02  -.1270061E-03
  -.1328275E-02  -.2245412E-02  -.3091773E-02  -.4023389E-02  -.4939084E-02
  -.5561126E-02  -.5777794E-02  -.5687199E-02  -.5361458E-02  -.4774807E-02
  -.3792776E-02  -.2294208E-02  -.4122668E-03   .1525328E-02   .3223725E-02
   .4509418E-02   .5391644E-02   .6005705E-02   .6505917E-02   .7041420E-02
   .7747688E-02   .8787982E-02   .1027561E-01   .1216007E-01   .1418230E-01
   .1597470E-01   .1731722E-01   .1818465E-01   .1868373E-01   .1894070E-01
   .1904629E-01   .1910857E-01   .1921542E-01   .1937456E-01   .1947138E-01
   .1943371E-01   .1924315E-01   .1881749E-01   .1822587E-01   .1758695E-01
   .1700592E-01   .1664178E-01   .1647097E-01   .1633701E-01   .1606484E-01
   .1552476E-01   .1459298E-01   .1310380E-01   .1103301E-01   .8510851E-02
   .5806206E-02   .3310298E-02   .1336156E-02  -.2765001E-04  -.1005692E-02
  -.2056973E-02  -.3557361E-02  -.5462813E-02  -.7371015E-02  -.8989320E-02
  -.1030005E-01  -.1139126E-01  -.1236257E-01  -.1321166E-01  -.1370670E-01
  -.1354455E-01  -.1268339E-01  -.1140247E-01  -.1009268E-01  -.9096765E-02
  -.8559437E-02  -.8451284E-02  -.8656539E-02  -.8860883E-02  -.8769394E-02
  -.8416533E-02  -.8059482E-02  -.7867558E-02  -.7785173E-02  -.7740290E-02
  -.7690981E-02  -.7583850E-02  -.7489010E-02  -.7461921E-02  -.7422046E-02
  -.7301897E-02  -.7123636E-02  -.7003834E-02  -.7143715E-02  -.7752927E-02
  -.8767983E-02  -.9777602E-02  -.1044911E-01  -.1070319E-01  -.1064666E-01
  -.1063110E-01  -.1095908E-01  -.1170744E-01  -.1283098E-01  -.1416027E-01
  -.1552416E-01  -.1686016E-01  -.1811691E-01  -.1909636E-01  -.1971892E-01
  -.2004661E-01  -.1998213E-01  -.1937831E-01  -.1819064E-01  -.1666208E-01
  -.1526060E-01  -.1441206E-01  -.1433783E-01  -.1487480E-01  -.1557609E-01
  -.1591601E-01  -.1558067E-01  -.1461257E-01  -.1327795E-01  -.1181364E-01
  -.1027756E-01  -.8712015E-02  -.7229813E-02  -.5927711E-02  -.4710889E-02
  -.3441524E-02  -.2164971E-02  -.1002511E-02  -.2950655E-04   .7620696E-03
   .1378342E-02   .1665136E-02   .1398206E-02   .4023638E-03  -.1416910E-02
  -.3807379E-02  -.6104341E-02  -.7739708E-02  -.8614624E-02  -.8969609E-02
  -.9204511E-02  -.9565592E-02  -.1009039E-01  -.1075769E-01  -.1140878E-01
  -.1183362E-01  -.1182711E-01  -.1128632E-01  -.1031717E-01  -.9178670E-02
  -.8217907E-02  -.7704196E-02  -.7682899E-02  -.8077208E-02  -.8779267E-02
  -.9562394E-02  -.1020306E-01  -.1061246E-01  -.1076369E-01  -.1070420E-01
  -.1053812E-01  -.1033768E-01  -.1020212E-01  -.1023878E-01  -.1040765E-01
  -.1055826E-01  -.1051028E-01  -.1008402E-01  -.9273234E-02  -.8260170E-02
  -.7214148E-02  -.6207710E-02  -.5231099E-02  -.4273203E-02  -.3278276E-02
  -.2116465E-02  -.7262598E-03   .7537065E-03   .2129507E-02   .3406611E-02
   .4614402E-02   .5678424E-02   .6494391E-02   .6946998E-02   .7042120E-02
   .6790562E-02   .6112900E-02   .5153865E-02   .4179635E-02   .3419893E-02
   .3143136E-02   .3461210E-02   .4228335E-02   .5200732E-02   .6267796E-02
   .7482194E-02   .8891125E-02   .1050371E-01   .1235746E-01   .1431656E-01
   .1614991E-01   .1769415E-01   .1886416E-01   .1977278E-01   .2048063E-01
   .2099478E-01   .2130909E-01   .2148475E-01   .2174912E-01   .2211225E-01
   .2240221E-01   .2237391E-01   .2184510E-01   .2083905E-01   .1944305E-01
   .1780430E-01   .1579196E-01   .1316624E-01   .1017739E-01   .7319761E-02
   .5016932E-02   .3387251E-02   .2133318E-02   .9330281E-03  -.3189196E-03
  -.1519530E-02  -.2399531E-02  -.2820678E-02  -.2851641E-02  -.2635850E-02
  -.2397270E-02  -.2326047E-02  -.2574485E-02  -.3098540E-02  -.3696085E-02
  -.4143067E-02  -.4221502E-02  -.3908906E-02  -.3350176E-02  -.2814365E-02
  -.2417343E-02  -.2057771E-02  -.1683814E-02  -.1375402E-02  -.1250922E-02
  -.1384366E-02  -.1822300E-02  -.2468485E-02  -.3267118E-02  -.4227320E-02
  -.5335372E-02  -.6651681E-02  -.8053430E-02  -.9310043E-02  -.1023657E-01
  -.1062433E-01  -.1044461E-01  -.9791543E-02  -.8760530E-02  -.7576148E-02
  -.6441627E-02  -.5413736E-02  -.4565418E-02  -.3907422E-02  -.3184103E-02
  -.2012850E-02  -.3699567E-03   .1353277E-02   .2695245E-02   .3255587E-02
   .2937249E-02   .1932263E-02   .6417171E-03  -.3497907E-03  -.4368957E-03
   .8036153E-03   .3331042E-02   .6668297E-02   .9992574E-02   .1250321E-01
   .1382324E-01   .1372870E-01   .1235482E-01   .1154688E-01   .1396765E-01
   .1930008E-01   .2340405E-01   .2274713E-01   .1853387E-01   .1503890E-01
   .1486282E-01   .1698817E-01   .1870337E-01   .1849038E-01   .1693345E-01
   .1550860E-01   .1501120E-01   .1523850E-01   .1563305E-01   .1570696E-01
   .1531410E-01   .1461427E-01   .1398818E-01   .1383906E-01   .1405793E-01
   .1418574E-01   .1381336E-01   .1270403E-01   .1091424E-01   .8804079E-02
   .6742542E-02   .4753789E-02   .2472252E-02  -.5299653E-03  -.4198866E-02
  -.8045104E-02  -.1146770E-01  -.1396300E-01  -.1545580E-01  -.1625123E-01
  -.1666091E-01  -.1687951E-01  -.1699832E-01  -.1715246E-01  -.1760136E-01
  -.1853710E-01  -.1989785E-01  -.2145634E-01  -.2310490E-01  -.2485216E-01
  -.2660601E-01  -.2821227E-01  -.2953978E-01  -.3046452E-01  -.3095454E-01
  -.3113299E-01  -.3120499E-01  -.3131547E-01  -.3142022E-01  -.3142226E-01
  -.3139960E-01  -.3149512E-01  -.3179032E-01  -.3224193E-01  -.3270355E-01
  -.3299394E-01  -.3308581E-01  -.3315740E-01  -.3341361E-01  -.3394096E-01
  -.3456304E-01  -.3506407E-01  -.3534268E-01  -.3539760E-01  -.3528298E-01
  -.3495416E-01  -.3437718E-01  -.3359918E-01  -.3263850E-01  -.3157104E-01
  -.3050578E-01  -.2950041E-01  -.2861322E-01  -.2780326E-01  -.2711781E-01
  -.2669989E-01  -.2655699E-01  -.2667236E-01  -.2709184E-01  -.2794157E-01
  -.2918603E-01  -.3033238E-01  -.3097375E-01  -.3142315E-01  -.3218854E-01
  -.3322044E-01  -.3399341E-01  -.3413269E-01  -.3360618E-01  -.3249345E-01
  -.3104808E-01  -.2960177E-01  -.2825311E-01  -.2692679E-01  -.2547522E-01
  -.2369701E-01  -.2147406E-01  -.1885951E-01  -.1612307E-01  -.1361392E-01
  -.1152221E-01  -.9724803E-02  -.7924935E-02  -.5847099E-02  -.3352359E-02
  -.5117784E-03   .2612814E-02   .6048737E-02   .9787240E-02   .1359196E-01
   .1700213E-01   .1949358E-01   .2092044E-01   .2163749E-01   .2199193E-01
   .2239723E-01   .2296508E-01   .2327424E-01   .2315838E-01   .2265344E-01
   .2197890E-01   .2161046E-01   .2174239E-01   .2235469E-01   .2333319E-01
   .2431971E-01   .2491996E-01   .2490782E-01   .2432954E-01   .2340556E-01
   .2239321E-01   .2176686E-01   .2173034E-01   .2214955E-01   .2288846E-01
   .2367303E-01   .2443310E-01   .2518035E-01   .2587724E-01   .2648265E-01
   .2693746E-01   .2750827E-01   .2847797E-01   .2976862E-01   .3108776E-01
   .3206019E-01   .3260164E-01   .3294579E-01   .3316921E-01   .3333499E-01
   .3358072E-01   .3379528E-01   .3399821E-01   .3439427E-01   .3493092E-01
   .3553069E-01   .3617164E-01   .3666758E-01   .3666612E-01   .3601747E-01
   .3519033E-01   .3464722E-01   .3463798E-01   .3534985E-01   .3622459E-01
   .3650383E-01   .3595167E-01   .3473467E-01   .3329885E-01   .3197946E-01
   .3091943E-01   .3021017E-01   .2972525E-01   .2913157E-01   .2820770E-01
   .2723123E-01   .2676975E-01   .2709508E-01   .2790305E-01   .2837036E-01
   .2842714E-01   .2866652E-01   .2918589E-01   .2962128E-01   .2987619E-01
   .3013327E-01   .3020653E-01   .3055393E-01   .3168772E-01   .3327879E-01
   .3504555E-01   .3723928E-01   .3992512E-01   .4262315E-01   .4503441E-01
   .4688823E-01   .4825221E-01   .4919808E-01   .4945694E-01   .4910056E-01
   .4841321E-01   .4773805E-01   .4741168E-01   .4750399E-01   .4790824E-01
   .4850719E-01   .4898093E-01   .4893576E-01   .4843712E-01   .4766627E-01
   .4661111E-01   .4532158E-01   .4388638E-01   .4245873E-01   .4123288E-01
   .4020345E-01   .3904282E-01   .3763254E-01   .3606304E-01   .3459539E-01
   .3360814E-01   .3318846E-01   .3322728E-01   .3322235E-01   .3284019E-01
   .3218513E-01   .3129976E-01   .3013955E-01   .2859136E-01   .2652414E-01
   .2391482E-01   .2102725E-01   .1841756E-01   .1662057E-01   .1575106E-01
   .1561521E-01   .1588247E-01   .1599675E-01   .1556387E-01   .1467896E-01
   .1338546E-01   .1179445E-01   .1003345E-01   .7913610E-02   .5612159E-02
   .3474368E-02   .1547435E-02  -.1511566E-03  -.1628456E-02  -.3072038E-02
  -.4623090E-02  -.6022731E-02  -.7137468E-02  -.8244997E-02  -.9534833E-02
  -.1104449E-01  -.1252860E-01  -.1371169E-01  -.1457084E-01  -.1526646E-01
  -.1607004E-01  -.1706071E-01  -.1824159E-01  -.1988267E-01  -.2216832E-01
  -.2487037E-01  -.2767041E-01  -.3004355E-01  -.3177817E-01  -.3321012E-01
  -.3457719E-01  -.3616371E-01  -.3814369E-01  -.4026102E-01  -.4205073E-01
  -.4292709E-01  -.4271880E-01  -.4192003E-01  -.4102063E-01  -.4048697E-01
  -.4049868E-01  -.4091484E-01  -.4156515E-01  -.4227502E-01  -.4294739E-01
  -.4368245E-01  -.4456477E-01  -.4525765E-01  -.4541882E-01  -.4514539E-01
  -.4461375E-01  -.4403738E-01  -.4394819E-01  -.4432615E-01  -.4486060E-01
  -.4539405E-01  -.4572084E-01  -.4582921E-01  -.4561178E-01  -.4511514E-01
  -.4443240E-01  -.4349698E-01  -.4246573E-01  -.4165330E-01  -.4146564E-01
  -.4223796E-01  -.4380391E-01  -.4570043E-01  -.4718674E-01  -.4749138E-01
  -.4652362E-01  -.4471464E-01  -.4265185E-01  -.4063806E-01  -.3874654E-01
  -.3717851E-01  -.3617189E-01  -.3586735E-01  -.3598444E-01  -.3576975E-01
  -.3515104E-01  -.3455879E-01  -.3392010E-01  -.3332572E-01  -.3268026E-01
  -.3179704E-01  -.3103900E-01  -.3059375E-01  -.3051518E-01  -.3038879E-01
  -.2965794E-01  -.2814348E-01  -.2526077E-01  -.2125395E-01  -.1738064E-01
  -.1434040E-01  -.1246215E-01  -.1152660E-01  -.1093199E-01  -.1054877E-01
  -.1054515E-01  -.1087181E-01  -.1131945E-01  -.1161132E-01  -.1144695E-01
  -.1075108E-01  -.9809254E-02  -.9238086E-02  -.9276984E-02  -.9584103E-02
  -.9744146E-02  -.9512135E-02  -.8954687E-02  -.8310667E-02  -.7625506E-02
  -.6925435E-02  -.6292126E-02  -.5752025E-02  -.5134733E-02  -.4551594E-02
  -.4335506E-02  -.4578684E-02  -.5406299E-02  -.6476990E-02  -.7214704E-02
  -.7513570E-02  -.7492623E-02  -.7344156E-02  -.7208617E-02  -.7143608E-02
  -.7338836E-02  -.7770123E-02  -.8321008E-02  -.8866353E-02  -.9046925E-02
  -.8750576E-02  -.8168459E-02  -.7366070E-02  -.6451098E-02  -.5655304E-02
  -.4950299E-02  -.4519609E-02  -.4536163E-02  -.4726675E-02  -.5246136E-02
  -.6279683E-02  -.7484709E-02  -.8316205E-02  -.8455831E-02  -.8256861E-02
  -.8362124E-02  -.8964955E-02  -.9641336E-02  -.9975337E-02  -.9758608E-02
  -.8928893E-02  -.7696710E-02  -.6364720E-02  -.5172169E-02  -.4100471E-02
  -.2787707E-02  -.1170725E-02   .6209681E-03   .2597514E-02   .4351982E-02
   .5685485E-02   .6845543E-02   .7893237E-02   .8806962E-02   .9633468E-02
   .1041904E-01   .1144162E-01   .1289976E-01   .1442710E-01   .1578104E-01
   .1666263E-01   .1674570E-01   .1614240E-01   .1477328E-01   .1309558E-01
   .1181918E-01   .1094261E-01   .1055974E-01   .1055392E-01   .1071541E-01
   .1132073E-01   .1253065E-01   .1413756E-01   .1578988E-01   .1745449E-01
   .1962862E-01   .2265224E-01   .2622578E-01   .2968342E-01   .3230276E-01
   .3380605E-01   .3444367E-01   .3468113E-01   .3488156E-01   .3526185E-01
   .3591995E-01   .3663747E-01   .3738835E-01   .3820154E-01   .3897717E-01
   .3960829E-01   .3976174E-01   .3925714E-01   .3819036E-01   .3687817E-01
   .3569448E-01   .3472926E-01   .3382346E-01   .3273708E-01   .3138470E-01
   .2973543E-01   .2784187E-01   .2589546E-01   .2423498E-01   .2330309E-01
   .2291633E-01   .2278135E-01   .2285955E-01   .2301824E-01   .2326710E-01
   .2344425E-01   .2326712E-01   .2263788E-01   .2158777E-01   .2025778E-01
   .1896455E-01   .1798172E-01   .1766794E-01   .1851064E-01   .2041547E-01
   .2278903E-01   .2499110E-01   .2653369E-01   .2750271E-01   .2823039E-01
   .2867784E-01   .2882237E-01   .2864681E-01   .2816357E-01   .2746496E-01
   .2664249E-01   .2579992E-01   .2485366E-01   .2380768E-01   .2283265E-01
   .2196135E-01   .2121906E-01   .2066026E-01   .2031375E-01   .2026244E-01
   .2025141E-01   .2009475E-01   .1968172E-01   .1894384E-01   .1807440E-01
   .1724362E-01   .1684793E-01   .1722596E-01   .1843068E-01   .2039932E-01
   .2264100E-01   .2465126E-01   .2637578E-01   .2749840E-01   .2769991E-01
   .2730249E-01   .2660224E-01   .2572510E-01   .2479652E-01   .2355841E-01
   .2197542E-01   .2025557E-01   .1855097E-01   .1700872E-01   .1545285E-01
   .1395244E-01   .1250004E-01   .1062020E-01   .8024730E-02   .4699196E-02
   .8087978E-03  -.2993945E-02  -.6146859E-02  -.8761552E-02  -.1092624E-01
  -.1287530E-01  -.1483158E-01  -.1658148E-01  -.1810544E-01  -.1969214E-01
  -.2169267E-01  -.2427763E-01  -.2722760E-01  -.3009278E-01  -.3245170E-01
  -.3421771E-01  -.3559420E-01  -.3678434E-01  -.3781829E-01  -.3860946E-01
  -.3913807E-01  -.3948877E-01  -.3988246E-01  -.4071976E-01  -.4226764E-01
  -.4426937E-01  -.4647167E-01  -.4865389E-01  -.5036060E-01  -.5149720E-01
  -.5226172E-01  -.5289347E-01  -.5361611E-01  -.5427245E-01  -.5466928E-01
  -.5490861E-01  -.5522225E-01  -.5556042E-01  -.5548829E-01  -.5460793E-01
  -.5272635E-01  -.4991385E-01  -.4658092E-01  -.4316339E-01  -.3974359E-01
  -.3626118E-01  -.3269513E-01  -.2886004E-01  -.2447857E-01  -.1993918E-01
  -.1616107E-01  -.1361678E-01  -.1178564E-01  -.9649397E-02  -.7336452E-02
  -.5889570E-02  -.5591638E-02  -.5802198E-02  -.6046868E-02  -.6376358E-02
  -.6868503E-02  -.7471701E-02  -.7947749E-02  -.8382174E-02  -.8994294E-02
  -.9605587E-02  -.1002426E-01  -.1003762E-01  -.9464744E-02  -.8730000E-02
  -.8384830E-02  -.8281229E-02  -.8038002E-02  -.7634356E-02  -.7384042E-02
  -.7521997E-02  -.8022138E-02  -.8469510E-02  -.8662042E-02  -.9277915E-02
  -.1064192E-01  -.1212231E-01  -.1325594E-01  -.1422727E-01  -.1507453E-01
  -.1499188E-01  -.1317945E-01  -.1067736E-01  -.9489201E-02  -.9882215E-02
  -.1041232E-01  -.9895222E-02  -.8807609E-02  -.8555453E-02  -.9634362E-02
  -.1122935E-01  -.1207145E-01  -.1172126E-01  -.1092599E-01  -.1071776E-01
  -.1178938E-01  -.1367595E-01  -.1501478E-01  -.1521779E-01  -.1468018E-01
  -.1395396E-01  -.1324453E-01  -.1246245E-01  -.1160695E-01  -.1079180E-01
  -.1009859E-01  -.9690308E-02  -.9551482E-02  -.9397717E-02  -.9081150E-02
  -.8409571E-02  -.7215967E-02  -.5593048E-02  -.3801347E-02  -.2040619E-02
  -.4481842E-03   .7722670E-03   .1540136E-02   .2063640E-02   .2585588E-02
   .3261290E-02   .4268655E-02   .5543182E-02   .6915297E-02   .8289971E-02
   .9665537E-02   .1102436E-01   .1221736E-01   .1308485E-01   .1361518E-01
   .1399161E-01   .1417942E-01   .1399394E-01   .1344604E-01   .1261469E-01
   .1163135E-01   .1053978E-01   .9210235E-02   .7717016E-02   .6228572E-02
   .4903822E-02   .4000792E-02   .3726144E-02   .4307495E-02   .5593862E-02
   .7117987E-02   .8481555E-02   .9320082E-02   .9523293E-02   .9134865E-02
   .8425216E-02   .7780273E-02   .7372879E-02   .7257939E-02   .7335739E-02
   .7480527E-02   .7665332E-02   .7799041E-02   .7801322E-02   .7655837E-02
   .7328969E-02   .6821922E-02   .6385445E-02   .6331965E-02   .6788318E-02
   .7701555E-02   .8751358E-02   .9577840E-02   .1000592E-01   .1004993E-01
   .9888173E-02   .9720102E-02   .9656163E-02   .9746867E-02   .9766211E-02
   .9501859E-02   .8866002E-02   .7690647E-02   .6066933E-02   .4242639E-02
   .2462745E-02   .1073031E-02   .3372709E-03   .1971137E-03   .4610488E-03
   .7931394E-03   .9609112E-03   .1113854E-02   .1228012E-02   .1182518E-02
   .1024454E-02   .8670127E-03   .8512859E-03   .9390015E-03   .9850811E-03
   .7232981E-03  -.6031011E-03  -.3859609E-02  -.7103431E-02  -.5663444E-02
   .9639634E-03   .7654484E-02   .1013208E-01   .8711339E-02   .6322590E-02
   .5016263E-02   .5169925E-02   .6285247E-02   .7619872E-02   .8816768E-02
   .1008931E-01   .1173721E-01   .1364871E-01   .1531520E-01   .1634143E-01
   .1668777E-01   .1657448E-01   .1633684E-01   .1620115E-01   .1622830E-01
   .1632383E-01   .1636471E-01   .1638513E-01   .1642166E-01   .1666028E-01
   .1734503E-01   .1840107E-01   .1984194E-01   .2151272E-01   .2302754E-01
   .2436225E-01   .2569687E-01   .2705696E-01   .2836061E-01   .2959049E-01
   .3077168E-01   .3193758E-01   .3308603E-01   .3423438E-01   .3523207E-01
   .3601556E-01   .3666057E-01   .3709761E-01   .3737345E-01   .3744093E-01
   .3728097E-01   .3711283E-01   .3709833E-01   .3721901E-01   .3760298E-01
   .3817032E-01   .3848735E-01   .3854931E-01   .3823720E-01   .3741655E-01
   .3643512E-01   .3547657E-01   .3450717E-01   .3360840E-01   .3284507E-01
   .3203292E-01   .3097774E-01   .2959159E-01   .2777663E-01   .2555391E-01
   .2306976E-01   .2049300E-01   .1793880E-01   .1547314E-01   .1308143E-01
   .1079675E-01   .8652306E-02   .6516877E-02   .4371049E-02   .2029835E-02
  -.8180848E-03  -.4164828E-02  -.7660692E-02  -.1076597E-01  -.1318480E-01
  -.1489255E-01  -.1604803E-01  -.1700809E-01  -.1784818E-01  -.1856686E-01
  -.1943343E-01  -.2050208E-01  -.2174783E-01  -.2305394E-01  -.2424861E-01
  -.2529772E-01  -.2604482E-01  -.2659485E-01  -.2710636E-01  -.2747508E-01
  -.2775540E-01  -.2786731E-01  -.2771247E-01  -.2745068E-01  -.2707176E-01
  -.2649560E-01  -.2559615E-01  -.2417673E-01  -.2226479E-01  -.2024148E-01
  -.1855423E-01  -.1736261E-01  -.1664554E-01  -.1609345E-01  -.1547139E-01
  -.1488230E-01  -.1422923E-01  -.1346041E-01  -.1258704E-01  -.1156375E-01
  -.1047898E-01  -.9489897E-02  -.8653856E-02  -.7797846E-02  -.6822675E-02
  -.5844589E-02  -.4998840E-02  -.4365626E-02  -.4155911E-02  -.4618073E-02
  -.5664370E-02  -.7019835E-02  -.8486817E-02  -.9776332E-02  -.1061576E-01
  -.1098570E-01  -.1099404E-01  -.1082205E-01  -.1069414E-01  -.1075583E-01
  -.1100363E-01  -.1145841E-01  -.1191102E-01  -.1191766E-01  -.1142502E-01
  -.1052420E-01  -.9317255E-02  -.7899162E-02  -.6198488E-02  -.4411111E-02
  -.2771762E-02  -.1313462E-02  -.1038957E-03   .9318188E-03   .1706050E-02
   .2120316E-02   .2374290E-02   .2531606E-02   .2649633E-02   .2988700E-02
   .3644699E-02   .4365033E-02   .4819508E-02   .4827703E-02   .4464749E-02
   .3917730E-02   .3304235E-02   .2735527E-02   .2177154E-02   .1413894E-02
   .2633287E-03  -.1394980E-02  -.3460425E-02  -.5803820E-02  -.8249614E-02
  -.1044857E-01  -.1214583E-01  -.1298222E-01  -.1280040E-01  -.1188233E-01
  -.1056377E-01  -.9204342E-02  -.8104611E-02  -.7336719E-02  -.6768163E-02
  -.6233526E-02  -.5615179E-02  -.4955639E-02  -.4465344E-02  -.4301358E-02
  -.4623300E-02  -.5454085E-02  -.6633111E-02  -.8030677E-02  -.9535296E-02
  -.1094762E-01  -.1210086E-01  -.1300075E-01  -.1360086E-01  -.1381120E-01
  -.1366332E-01  -.1339524E-01  -.1318738E-01  -.1301364E-01  -.1291024E-01
  -.1283676E-01  -.1266888E-01  -.1222802E-01  -.1133002E-01  -.1014283E-01
  -.8911547E-02  -.7841337E-02  -.7180177E-02  -.6876700E-02  -.6832795E-02
  -.7028910E-02  -.7371975E-02  -.7727972E-02  -.7929456E-02  -.7737586E-02
  -.7043293E-02  -.6038136E-02  -.4952010E-02  -.3963982E-02  -.3137655E-02
  -.2310755E-02  -.1275286E-02  -.5260223E-04   .1191743E-02   .2303313E-02
   .3294693E-02   .4379208E-02   .5620578E-02   .6905239E-02   .8156356E-02
   .9274993E-02   .1023381E-01   .1107004E-01   .1162502E-01   .1165322E-01
   .1100669E-01   .9683436E-02   .7901035E-02   .5986839E-02   .4124712E-02
   .2396169E-02   .7611290E-03  -.9305027E-03  -.2630539E-02  -.3988721E-02
  -.4702518E-02  -.4896641E-02  -.5096554E-02  -.5970502E-02  -.7801491E-02
  -.1031650E-01  -.1282077E-01  -.1461477E-01  -.1557662E-01  -.1606585E-01
  -.1654571E-01  -.1737769E-01  -.1854594E-01  -.1984101E-01  -.2107489E-01
  -.2197212E-01  -.2232285E-01  -.2206041E-01  -.2130545E-01  -.2026609E-01
  -.1925293E-01  -.1848403E-01  -.1781779E-01  -.1707567E-01  -.1617764E-01
  -.1500820E-01  -.1372431E-01  -.1273454E-01  -.1227708E-01  -.1229450E-01
  -.1256173E-01  -.1285570E-01  -.1297188E-01  -.1279112E-01  -.1221924E-01
  -.1115082E-01  -.9709877E-02  -.8156714E-02  -.6611680E-02  -.5199043E-02
  -.3955468E-02  -.2818440E-02  -.1779101E-02  -.7931897E-03   .1492223E-03
   .1015949E-02   .1767918E-02   .2384697E-02   .2869670E-02   .3141420E-02
   .3166362E-02   .2961206E-02   .2589783E-02   .2242726E-02   .2039494E-02
   .1998581E-02   .2027574E-02   .2023513E-02   .1959799E-02   .1771898E-02
   .1441363E-02   .9416101E-03   .1582254E-03  -.8246798E-03  -.1739927E-02
  -.2554263E-02  -.3259819E-02  -.3778355E-02  -.4114682E-02  -.4131733E-02
  -.3746102E-02  -.3077190E-02  -.2214774E-02  -.1239022E-02  -.2877426E-03
   .6054788E-03   .1469479E-02   .2384023E-02   .3348920E-02   .4199034E-02
   .4799303E-02   .5074160E-02   .5198577E-02   .5358087E-02   .5626964E-02
   .6114830E-02   .6825446E-02   .7696089E-02   .8456905E-02   .8778010E-02
   .8495042E-02   .7757052E-02   .6977259E-02   .6593641E-02   .7025078E-02
   .8123456E-02   .9369158E-02   .1040372E-01   .1089977E-01   .1080439E-01
   .1041959E-01   .1007566E-01   .9962761E-02   .1016037E-01   .1052254E-01
   .1091688E-01   .1140647E-01   .1185251E-01   .1203179E-01   .1180647E-01
   .1104636E-01   .9732701E-02   .8050171E-02   .6343249E-02   .4854889E-02
   .3750631E-02   .3210376E-02   .3193478E-02   .3505439E-02   .4031952E-02
   .4588888E-02   .4961508E-02   .5219054E-02   .5454920E-02   .5689833E-02
   .6071580E-02   .6759824E-02   .7756718E-02   .8896319E-02   .1003627E-01
   .1104980E-01   .1181917E-01   .1241558E-01   .1303469E-01   .1392218E-01
   .1514330E-01   .1643516E-01   .1749161E-01   .1814761E-01   .1852057E-01
   .1865379E-01   .1843349E-01   .1792064E-01   .1718261E-01   .1634646E-01
   .1561284E-01   .1508125E-01   .1467564E-01   .1424504E-01   .1371656E-01
   .1301981E-01   .1210255E-01   .1103479E-01   .1004397E-01   .9286506E-02
   .8714147E-02   .8323892E-02   .8029076E-02   .7682578E-02   .7285039E-02
   .6878676E-02   .6505482E-02   .6085536E-02   .5585490E-02   .5034089E-02
   .4362089E-02   .3661699E-02   .3156133E-02   .2889109E-02   .2774842E-02
   .2655202E-02   .2342202E-02   .1903964E-02   .1534041E-02   .1331981E-02
   .1306248E-02   .1419092E-02   .1779624E-02   .2661803E-02   .4098004E-02
   .5815607E-02   .7609427E-02   .9120412E-02   .9973724E-02   .1007820E-01
   .9558857E-02   .8749486E-02   .7908442E-02   .7251750E-02   .6954521E-02
   .6993084E-02   .7262214E-02   .7555986E-02   .7718932E-02   .7757879E-02
   .7777650E-02   .7926218E-02   .8242908E-02   .8749772E-02   .9402909E-02
   .1007885E-01   .1063303E-01   .1092640E-01   .1097115E-01   .1093988E-01
   .1098292E-01   .1115382E-01   .1149993E-01   .1196989E-01   .1248431E-01
   .1295297E-01   .1333853E-01   .1370005E-01   .1396659E-01   .1391175E-01
   .1336168E-01   .1221541E-01   .1036340E-01   .7924911E-02   .5142635E-02
   .2228364E-02  -.5344222E-03  -.2874734E-02  -.4623432E-02  -.5764259E-02
  -.6377633E-02  -.6662295E-02  -.6849650E-02  -.7037677E-02  -.7249766E-02
  -.7436545E-02  -.7511011E-02  -.7434149E-02  -.7252831E-02  -.7047297E-02
  -.6926616E-02  -.6935938E-02  -.6954975E-02  -.6875257E-02  -.6630855E-02
  -.6166731E-02  -.5479322E-02  -.4600470E-02  -.3616511E-02  -.2685430E-02
  -.1994212E-02  -.1689946E-02  -.1803852E-02  -.2245658E-02  -.2886677E-02
  -.3660142E-02  -.4591395E-02  -.5703087E-02  -.6928085E-02  -.8157946E-02
  -.9306752E-02  -.1026644E-01  -.1098173E-01  -.1151229E-01  -.1187810E-01
  -.1205640E-01  -.1208854E-01  -.1196351E-01  -.1162572E-01  -.1125992E-01
  -.1107958E-01  -.1111966E-01  -.1138977E-01  -.1176209E-01  -.1194335E-01
  -.1161298E-01  -.1066424E-01  -.9326266E-02  -.8013977E-02  -.7118778E-02
  -.6789436E-02  -.6814619E-02  -.6719379E-02  -.6086889E-02  -.4865162E-02
  -.3464295E-02  -.2460357E-02  -.2135093E-02  -.2476078E-02  -.3433361E-02
  -.4810684E-02  -.6088609E-02  -.6732027E-02  -.6532910E-02  -.5690294E-02
  -.4688914E-02  -.3926015E-02  -.3403135E-02  -.2868231E-02  -.2075074E-02
  -.9414101E-03   .3299605E-03   .1455068E-02   .2219836E-02   .2570797E-02
   .2635624E-02   .2510745E-02   .2321513E-02   .2157870E-02   .1952932E-02
   .1774135E-02   .1592832E-02   .1207851E-02   .6852229E-03   .1869450E-03
  -.1666333E-03  -.3862155E-03  -.6172689E-03  -.9595948E-03  -.1446577E-02
  -.1885636E-02  -.1999487E-02  -.1658017E-02  -.9308880E-03  -.1856931E-04
   .7714515E-03   .1166603E-02   .1257709E-02   .1249120E-02   .1183902E-02
   .1094278E-02   .9586288E-03   .7718908E-03   .6286807E-03   .4958217E-03
   .3619401E-03   .2890585E-03   .2737786E-03   .3097043E-03   .3820773E-03
   .3561666E-03   .8363071E-04  -.4612314E-03  -.1243268E-02  -.2114284E-02
  -.3000381E-02  -.3941133E-02  -.4993585E-02  -.6144363E-02  -.7161739E-02
  -.7920140E-02  -.8518449E-02  -.9184673E-02  -.1007037E-01  -.1110337E-01
  -.1200707E-01  -.1227606E-01  -.1164713E-01  -.1037680E-01  -.8960401E-02
  -.7821840E-02  -.7165676E-02  -.6891215E-02  -.6618641E-02  -.6078694E-02
  -.5218377E-02  -.4024024E-02  -.2731307E-02  -.1538704E-02  -.4343734E-03
   .5333147E-03   .1370406E-02   .2241255E-02   .3436082E-02   .4958031E-02
   .6515419E-02   .7831769E-02   .8718550E-02   .9223891E-02   .9692414E-02
   .1053964E-01   .1188811E-01   .1356736E-01   .1526707E-01   .1661577E-01
   .1746593E-01   .1781912E-01   .1764652E-01   .1718960E-01   .1670857E-01
   .1636515E-01   .1626251E-01   .1625766E-01   .1611927E-01   .1567220E-01
   .1498580E-01   .1419372E-01   .1322489E-01   .1199314E-01   .1054417E-01
   .9158093E-02   .8065263E-02   .7394372E-02   .7260402E-02   .7246212E-02
   .6768925E-02   .5652637E-02   .4154140E-02   .2751015E-02   .1735238E-02
   .1175477E-02   .1009808E-02   .1231563E-02   .1734762E-02   .2328447E-02
   .2859932E-02   .3058594E-02   .2943926E-02   .2702928E-02   .2446379E-02
   .2321305E-02   .2299356E-02   .2234364E-02   .2049892E-02   .1680432E-02
   .1189861E-02   .6989397E-03   .1256580E-03  -.5766150E-03  -.1464823E-02
  -.2447520E-02  -.3258701E-02  -.3822553E-02  -.4070811E-02  -.3998113E-02
  -.3679464E-02  -.3135415E-02  -.2433242E-02  -.1637456E-02  -.7929047E-03
  -.1220674E-03   .2157574E-03   .2241061E-03  -.8686659E-04  -.4570834E-03
  -.5256962E-03  -.1807990E-03   .4041775E-03   .9446986E-03   .1114609E-02
   .7711633E-03   .1286810E-03  -.8008758E-03  -.1990683E-02  -.3250478E-02
  -.4490259E-02  -.5464380E-02  -.6132571E-02  -.6543202E-02  -.6760237E-02
  -.7064302E-02  -.7457953E-02  -.7796648E-02  -.8119133E-02  -.8348735E-02
  -.8524502E-02  -.8731084E-02  -.8826572E-02  -.8832942E-02  -.8810055E-02
  -.8697324E-02  -.8355123E-02  -.7942905E-02  -.7751566E-02  -.7825498E-02
  -.8078453E-02  -.8364896E-02  -.8623540E-02  -.8547511E-02  -.8115118E-02
  -.7604743E-02  -.7040414E-02  -.6474009E-02  -.5949467E-02  -.5546836E-02
  -.5408700E-02  -.5505100E-02  -.5530552E-02  -.5236411E-02  -.4572451E-02
  -.3687604E-02  -.2735236E-02  -.1700776E-02  -.6878585E-03   .1874833E-03
   .7828513E-03   .9550700E-03   .7535523E-03   .3787359E-03   .1315204E-03
   .6838980E-04   .1805247E-03   .4114123E-03   .3788688E-03  -.4529125E-04
  -.6462662E-03  -.1198097E-02  -.1552321E-02  -.1718267E-02  -.1806966E-02
  -.2077955E-02  -.2551274E-02  -.3046046E-02  -.3562300E-02  -.3896337E-02
  -.3956215E-02  -.4113791E-02  -.4585757E-02  -.5139131E-02  -.5571129E-02
  -.5819699E-02  -.5891259E-02  -.5832061E-02  -.5668005E-02  -.5365085E-02
  -.4799491E-02  -.4076394E-02  -.3239061E-02  -.2298981E-02  -.1507023E-02
  -.8978110E-03  -.4078929E-03  -.1424447E-03   .2282230E-04   .2379118E-03
   .5051149E-03   .7740753E-03   .8089753E-03   .4035095E-03  -.3829797E-03
  -.1383551E-02  -.2455746E-02  -.3312310E-02  -.3901878E-02  -.4278245E-02
  -.4432237E-02  -.4430011E-02  -.4321857E-02  -.4266501E-02  -.4347310E-02
  -.4502654E-02  -.4674937E-02  -.5076553E-02  -.5970862E-02  -.7178684E-02
  -.8428028E-02  -.9679731E-02  -.1061832E-01  -.1095222E-01  -.1089970E-01
  -.1066180E-01  -.1030541E-01  -.9980961E-02  -.9692223E-02  -.9221409E-02
  -.8580600E-02  -.7718699E-02  -.6657508E-02  -.5587411E-02  -.4549782E-02
  -.3702322E-02  -.3136856E-02  -.2874247E-02  -.2816258E-02  -.2731063E-02
  -.2547504E-02  -.2206031E-02  -.1729950E-02  -.1359866E-02  -.1224910E-02
  -.1514597E-02  -.2082020E-02  -.2579563E-02  -.3067873E-02  -.3432425E-02
  -.3585194E-02  -.3689842E-02  -.3940711E-02  -.4330450E-02  -.4850136E-02
  -.5465082E-02  -.6031299E-02  -.6605604E-02  -.6963202E-02  -.7121320E-02
  -.7188220E-02  -.7157099E-02  -.7389191E-02  -.7913813E-02  -.8588784E-02
  -.9362590E-02  -.1030321E-01  -.1120325E-01  -.1169884E-01  -.1184350E-01
  -.1158292E-01  -.1115789E-01  -.1081865E-01  -.1045894E-01  -.1034715E-01
  -.1055245E-01  -.1081426E-01  -.1095888E-01  -.1080244E-01  -.1042129E-01
  -.9946899E-02  -.9559040E-02  -.9429886E-02  -.9447064E-02  -.9449816E-02
  -.9459012E-02  -.9591994E-02  -.9796898E-02  -.1007748E-01  -.1052183E-01
  -.1093584E-01  -.1113274E-01  -.1128410E-01  -.1129430E-01  -.1098385E-01
  -.1039318E-01  -.9513243E-02  -.8443773E-02  -.7313470E-02  -.6422934E-02
  -.5899001E-02  -.5621445E-02  -.5566010E-02  -.5341754E-02  -.4850694E-02
  -.4485881E-02  -.4147613E-02  -.3811592E-02  -.3743343E-02  -.3814825E-02
  -.3879713E-02  -.4072882E-02  -.4337971E-02  -.4397924E-02  -.4165984E-02
  -.3820840E-02  -.3557855E-02  -.3123798E-02  -.2473632E-02  -.1907144E-02
  -.1425041E-02  -.9380261E-03  -.4593345E-03  -.8797589E-04   .6830777E-04
  -.4602947E-04  -.3576473E-03  -.9272969E-03  -.1632038E-02  -.2392111E-02
  -.3019222E-02  -.3268979E-02  -.3406664E-02  -.3340980E-02  -.3138350E-02
  -.3021794E-02  -.2871194E-02  -.2914678E-02  -.3160672E-02  -.3376975E-02
  -.3786674E-02  -.4364992E-02  -.4926204E-02  -.5616440E-02  -.6196035E-02
  -.6274876E-02  -.6075048E-02  -.5704079E-02  -.5055582E-02  -.4493955E-02
  -.4277800E-02  -.4251917E-02  -.4257269E-02  -.4178822E-02  -.3747214E-02
  -.2774272E-02  -.1426454E-02   .1690164E-03   .1719287E-02   .2715492E-02
   .3355438E-02   .3913542E-02   .4450286E-02   .5500326E-02   .7191861E-02
   .9209653E-02   .1123481E-01   .1269853E-01   .1356290E-01   .1405310E-01
   .1407144E-01   .1392931E-01   .1379616E-01   .1359906E-01   .1347128E-01
   .1333257E-01   .1289048E-01   .1206710E-01   .1108035E-01   .1001553E-01
   .9016012E-02   .8166023E-02   .7350294E-02   .6520839E-02   .5733425E-02
   .5013433E-02   .4336133E-02   .3843980E-02   .3668462E-02   .3692651E-02
   .3811155E-02   .3986760E-02   .3985615E-02   .3852337E-02   .3779685E-02
   .3790244E-02   .3921211E-02   .4096589E-02   .4193048E-02   .4076183E-02
   .3947600E-02   .3997251E-02   .4113221E-02   .4396512E-02   .4823943E-02
   .5181181E-02   .5360653E-02   .5421808E-02   .5420037E-02   .5465974E-02
   .5565066E-02   .5498679E-02   .5355336E-02   .5303188E-02   .5441303E-02
   .5797287E-02   .6244588E-02   .6598762E-02   .6771458E-02   .6883425E-02
   .6947316E-02   .6831038E-02   .6539529E-02   .6264924E-02   .6076858E-02
   .5994731E-02   .6129802E-02   .6606339E-02   .7338070E-02   .7992733E-02
   .8375053E-02   .8273516E-02   .7708181E-02   .6965333E-02   .6299911E-02
   .5853349E-02   .5521837E-02   .5104053E-02   .4541590E-02   .3988708E-02
   .3413582E-02   .2831319E-02   .2389043E-02   .1945154E-02   .1421213E-02
   .1037116E-02   .8584798E-03   .9054593E-03   .1197919E-02   .1533830E-02
   .1936080E-02   .2527261E-02   .3265130E-02   .4103225E-02   .4761754E-02
   .5126128E-02   .5274921E-02   .5208296E-02   .5144198E-02   .5154189E-02
   .5261494E-02   .5201933E-02   .4562262E-02   .3440239E-02   .2167731E-02
   .1079960E-02   .2835571E-03  -.2677834E-03  -.6162930E-03  -.8653774E-03
  -.1030933E-02  -.1121484E-02  -.1155537E-02  -.9914871E-03  -.4917242E-03
   .4605936E-03   .1711252E-02   .3088281E-02   .4525039E-02   .5839755E-02
   .6852650E-02   .7543074E-02   .8143061E-02   .8609121E-02   .9032418E-02
   .9584818E-02   .1008216E-01   .1024024E-01   .9833884E-02   .9050646E-02
   .8048691E-02   .6880336E-02   .5651466E-02   .4267296E-02   .2767101E-02
   .1323025E-02   .7623787E-04  -.8057650E-03  -.1467559E-02  -.2206443E-02
  -.3004995E-02  -.3722848E-02  -.4145489E-02  -.4133432E-02  -.3924405E-02
  -.3745877E-02  -.3666831E-02  -.3571391E-02  -.3200361E-02  -.2678244E-02
  -.2132866E-02  -.1479947E-02  -.8339612E-03  -.4636363E-03  -.4048876E-03
  -.3775723E-03  -.3331243E-03  -.2405136E-03   .4889875E-04   .3010263E-03
   .4198139E-03   .6329048E-03   .9141715E-03   .1096782E-02   .1294914E-02
   .1649906E-02   .2018516E-02   .2460886E-02   .3039579E-02   .3659445E-02
   .4193170E-02   .4496516E-02   .4628419E-02   .4656544E-02   .4676829E-02
   .4726997E-02   .4687789E-02   .4385753E-02   .3776802E-02   .2962183E-02
   .2149410E-02   .1549808E-02   .1130375E-02   .8241218E-03   .6112267E-03
   .5672165E-03   .6806315E-03   .7480635E-03   .6674966E-03   .2732275E-03
  -.4385250E-03  -.1109484E-02  -.1459475E-02  -.1328170E-02  -.6761934E-03
   .2795020E-03   .1239131E-02   .2103865E-02   .2989013E-02   .3923806E-02
   .4795107E-02   .5441193E-02   .5548878E-02   .5063604E-02   .4251683E-02
   .3400362E-02   .2857302E-02   .2717089E-02   .2715145E-02   .2479154E-02
   .1901459E-02   .1183023E-02   .5057706E-03  -.3030528E-04  -.4836551E-03
  -.1080352E-02  -.1895952E-02  -.2754074E-02  -.3465516E-02  -.3928975E-02
  -.4134967E-02  -.4155719E-02  -.4052330E-02  -.3912629E-02  -.3655240E-02
  -.3082723E-02  -.2162969E-02  -.9840336E-03   .2679304E-03   .1435338E-02
   .2532324E-02   .3571487E-02   .4517309E-02   .5375159E-02   .6043684E-02
   .6452774E-02   .6580837E-02   .6409885E-02   .6074148E-02   .5678290E-02
   .5244205E-02   .4839524E-02   .4558065E-02   .4468127E-02   .4487923E-02
   .4464860E-02   .4239844E-02   .3682368E-02   .2796639E-02   .1657938E-02
   .5168168E-03  -.3557491E-03  -.9447236E-03  -.1356225E-02  -.1635711E-02
  -.1827037E-02  -.1945514E-02  -.1971369E-02  -.1974484E-02  -.1986364E-02
  -.2099741E-02  -.2369549E-02  -.2689314E-02  -.3160501E-02  -.3797129E-02
  -.4338440E-02  -.4664371E-02  -.4751972E-02  -.4511426E-02  -.3885023E-02
  -.2990484E-02  -.2090538E-02  -.1366882E-02  -.8012134E-03  -.4015765E-03
  -.2458787E-03  -.3315454E-03  -.6548428E-03  -.1187745E-02  -.1831993E-02
  -.2471066E-02  -.3083131E-02  -.3591962E-02  -.3878102E-02  -.3937652E-02
  -.3711703E-02  -.3294160E-02  -.2862388E-02  -.2424627E-02  -.1948281E-02
  -.1365255E-02  -.6584947E-03   .1103923E-03   .8907179E-03   .1658237E-02
   .2470655E-02   .3422220E-02   .4443196E-02   .5314476E-02   .5940453E-02
   .6301519E-02   .6354329E-02   .6234056E-02   .6044706E-02   .5822712E-02
   .5670296E-02   .5651038E-02   .5887385E-02   .6271023E-02   .6551492E-02
   .6625511E-02   .6516197E-02   .6356005E-02   .6247816E-02   .6146121E-02
   .5991138E-02   .5891575E-02   .5839190E-02   .5728702E-02   .5422460E-02
   .4815732E-02   .3991461E-02   .3086915E-02   .2226658E-02   .1515798E-02
   .9719066E-03   .3857854E-03  -.4205063E-03  -.1299103E-02  -.2042084E-02
  -.2563937E-02  -.2864757E-02  -.2951952E-02  -.2892393E-02  -.2919740E-02
  -.3186157E-02  -.3613960E-02  -.3906290E-02  -.3839605E-02  -.3343186E-02
  -.2560410E-02  -.1937542E-02  -.1562277E-02  -.1278032E-02  -.1076420E-02
  -.8252463E-03  -.4615461E-03  -.1154765E-03   .2246724E-03   .5240324E-03
   .6771953E-03   .7311981E-03   .6855531E-03   .5552738E-03   .3670404E-03
   .1637876E-04  -.4326417E-03  -.8052313E-03  -.1093628E-02  -.1094491E-02
  -.6726999E-03  -.5747060E-04   .5440545E-03   .8686104E-03   .7698355E-03
   .4769436E-03   .2683153E-03   .2465485E-03   .3613115E-03   .4758283E-03
   .5280914E-03   .5393563E-03   .4527970E-03   .1617460E-03  -.2937798E-03
  -.7398352E-03  -.1068078E-02  -.1356624E-02  -.1732543E-02  -.2045311E-02
  -.2115585E-02  -.2036260E-02  -.1997567E-02  -.2058988E-02  -.2014136E-02
  -.1768125E-02  -.1495643E-02  -.1388079E-02  -.1586436E-02  -.2177417E-02
  -.2991132E-02  -.3673703E-02  -.4092614E-02  -.4276026E-02  -.4339268E-02
  -.4397048E-02  -.4472602E-02  -.4592201E-02  -.4700719E-02  -.4742431E-02
  -.4749269E-02  -.4741420E-02  -.4754192E-02  -.4886794E-02  -.5068665E-02
  -.5129690E-02  -.5038718E-02  -.4698396E-02  -.4121016E-02  -.3534675E-02
  -.3001992E-02  -.2415617E-02  -.1730382E-02  -.9302183E-03  -.1163640E-03
   .4493317E-03   .5663783E-03   .2275673E-03  -.2494787E-03  -.5073490E-03
  -.4313632E-03  -.8885209E-04   .2329065E-03   .3884782E-03   .4126140E-03
   .2904681E-03   .6215473E-04  -.1703618E-03  -.3297035E-03  -.3790416E-03
  -.3130833E-03  -.2868396E-03  -.3926672E-03  -.6404999E-03  -.1038762E-02
  -.1394801E-02  -.1479286E-02  -.1338402E-02  -.1134183E-02  -.9875842E-03
  -.1103884E-02  -.1607763E-02  -.2332297E-02  -.2888874E-02  -.3062818E-02
  -.2930187E-02  -.2775753E-02  -.2891041E-02  -.3303494E-02  -.3898807E-02
  -.4442143E-02  -.4821931E-02  -.5076510E-02  -.5253272E-02  -.5475472E-02
  -.5725500E-02  -.5916915E-02  -.6017835E-02  -.6050741E-02  -.5941447E-02
  -.5631054E-02  -.5224347E-02  -.4809693E-02  -.4500437E-02  -.4378680E-02
  -.4416959E-02  -.4495089E-02  -.4524051E-02  -.4446970E-02  -.4232737E-02
  -.3967672E-02  -.3801213E-02  -.3806627E-02  -.3961004E-02  -.4179065E-02
  -.4362054E-02  -.4576346E-02  -.4983101E-02  -.5614736E-02  -.6245917E-02
  -.6698938E-02  -.6994179E-02  -.7189401E-02  -.7329570E-02  -.7382989E-02
  -.7314524E-02  -.7081547E-02  -.6686560E-02  -.6245695E-02  -.5922366E-02
  -.5788062E-02  -.5759232E-02  -.5733570E-02  -.5668388E-02  -.5627735E-02
  -.5635671E-02  -.5504912E-02  -.5019885E-02  -.4099733E-02  -.2979352E-02
  -.2102260E-02  -.1694470E-02  -.1651803E-02  -.1725568E-02  -.1727308E-02
  -.1634807E-02  -.1619932E-02  -.1871600E-02  -.2334816E-02  -.2801905E-02
  -.3097072E-02  -.3090856E-02  -.2813911E-02  -.2414503E-02  -.2020901E-02
  -.1827213E-02  -.1960423E-02  -.2323998E-02  -.2677643E-02  -.2739273E-02
  -.2379665E-02  -.1681714E-02  -.8341938E-03   .8186666E-05   .7233012E-03
   .1331294E-02   .1990163E-02   .2760230E-02   .3546769E-02   .4154882E-02
   .4518357E-02   .4693942E-02   .4714429E-02   .4636736E-02   .4522754E-02
   .4351609E-02   .4200283E-02   .4265685E-02   .4546784E-02   .4908526E-02
   .5158486E-02   .5157672E-02   .4965057E-02   .4694429E-02   .4474717E-02
   .4319428E-02   .4104693E-02   .3712633E-02   .3167797E-02   .2588798E-02
   .2024859E-02   .1538096E-02   .1173392E-02   .9383907E-03   .7909692E-03
   .6274933E-03   .4311062E-03   .2430654E-03   .1564293E-03   .3045482E-03
   .6371497E-03   .1004530E-02   .1367515E-02   .1672268E-02   .1893603E-02
   .2063207E-02   .2192863E-02   .2389143E-02   .2679135E-02   .2960648E-02
   .3228671E-02   .3563502E-02   .4020514E-02   .4600016E-02   .5191400E-02
   .5597099E-02   .5751753E-02   .5748780E-02   .5728588E-02   .5786862E-02
   .5868432E-02   .5871680E-02   .5778096E-02   .5609401E-02   .5419255E-02
   .5265543E-02   .5064903E-02   .4762268E-02   .4507984E-02   .4464329E-02
   .4645432E-02   .4950316E-02   .5346699E-02   .5817648E-02   .6300426E-02
   .6779824E-02   .7238130E-02   .7592878E-02   .7880228E-02   .8071635E-02
   .7938163E-02   .7393436E-02   .6569117E-02   .5846807E-02   .5453912E-02
   .5266567E-02   .5086092E-02   .4851237E-02   .4641529E-02   .4429898E-02
   .4183566E-02   .3930214E-02   .3678635E-02   .3409536E-02   .3075240E-02
   .2656385E-02   .2194916E-02   .1793295E-02   .1473344E-02   .1168533E-02
   .8685638E-03   .5020808E-03  -.4377578E-04  -.7653446E-03  -.1564750E-02
  -.2358708E-02  -.3188277E-02  -.4071462E-02  -.4871900E-02  -.5481723E-02
  -.5765994E-02  -.5725712E-02  -.5587573E-02  -.5498363E-02  -.5553506E-02
  -.5776951E-02  -.6083739E-02  -.6402137E-02  -.6780583E-02  -.7280803E-02
  -.7834628E-02  -.8355273E-02  -.8786681E-02  -.9001112E-02  -.8980171E-02
  -.8888196E-02  -.8831726E-02  -.8880536E-02  -.9200122E-02  -.9798735E-02
  -.1040559E-01  -.1077924E-01  -.1086292E-01  -.1071622E-01  -.1044565E-01
  -.1016650E-01  -.9869081E-02  -.9476627E-02  -.8908533E-02  -.8180431E-02
  -.7515246E-02  -.7088990E-02  -.6898751E-02  -.6890946E-02  -.6975889E-02
  -.6980751E-02  -.6690432E-02  -.6069737E-02  -.5339354E-02  -.4672005E-02
  -.4106990E-02  -.3635026E-02  -.3217575E-02  -.2863904E-02  -.2552152E-02
  -.2252395E-02  -.2004458E-02  -.1749100E-02  -.1458282E-02  -.1078980E-02
  -.5423984E-03   .4768752E-04   .6463627E-03   .1257763E-02   .1953918E-02
   .2849861E-02   .3917681E-02   .5112459E-02   .6326471E-02   .7356885E-02
   .8192977E-02   .8936720E-02   .9636189E-02   .1032031E-01   .1076718E-01
   .1065853E-01   .1011912E-01   .9589776E-02   .9341505E-02   .9373966E-02
   .9557702E-02   .9693152E-02   .9768825E-02   .9887335E-02   .1001057E-01
   .1015858E-01   .1030167E-01   .1036401E-01   .1032619E-01   .1024336E-01
   .1016207E-01   .1009135E-01   .1008463E-01   .1005337E-01   .9911495E-02
   .9571640E-02   .8993549E-02   .8362291E-02   .7937513E-02   .7811805E-02
   .7766974E-02   .7522717E-02   .7071510E-02   .6503239E-02   .5830397E-02
   .5164776E-02   .4606294E-02   .4164707E-02   .3730646E-02   .3184925E-02
   .2583948E-02   .2037718E-02   .1578609E-02   .1244262E-02   .1052360E-02
   .8800061E-03   .6286277E-03   .2936359E-03  -.1448134E-03  -.6177274E-03
  -.9679715E-03  -.1209188E-02  -.1286964E-02  -.1168995E-02  -.9356883E-03
  -.6187621E-03  -.3913928E-03  -.3184203E-03  -.3917733E-03  -.5781078E-03
  -.8031216E-03  -.9720696E-03  -.9499988E-03  -.7806876E-03  -.6318675E-03
  -.5667240E-03  -.4840947E-03  -.3699060E-03  -.2395146E-03  -.2783716E-03
  -.6136316E-03  -.1099979E-02  -.1644451E-02  -.2034765E-02  -.2098670E-02
  -.1890133E-02  -.1555490E-02  -.1129574E-02  -.7112514E-03  -.5073102E-03
  -.4316005E-03  -.3078929E-03  -.8163742E-04   .3145420E-03   .9114594E-03
   .1550236E-02   .2011765E-02   .2318594E-02   .2594401E-02   .2838108E-02
   .3127149E-02   .3546957E-02   .3923116E-02   .4245337E-02   .4651947E-02
   .5149222E-02   .5830630E-02   .6614688E-02   .7298528E-02   .7790100E-02
   .8080492E-02   .8261066E-02   .8397710E-02   .8542571E-02   .8705286E-02
   .8807888E-02   .8742602E-02   .8496046E-02   .8194863E-02   .7857508E-02
   .7419284E-02   .6923791E-02   .6476449E-02   .6115550E-02   .5788366E-02
   .5372737E-02   .4823559E-02   .4240358E-02   .3732102E-02   .3389480E-02
   .3101505E-02   .2849526E-02   .2721645E-02   .2674562E-02   .2683374E-02
   .2571573E-02   .2338924E-02   .2167252E-02   .2044622E-02   .2060348E-02
   .2382034E-02   .2856783E-02   .3244447E-02   .3545916E-02   .3754820E-02
   .3873431E-02   .3995395E-02   .4114934E-02   .4095003E-02   .3873486E-02
   .3549202E-02   .3214308E-02   .2884552E-02   .2618635E-02   .2317952E-02
   .1854321E-02   .1379092E-02   .9325547E-03   .5300818E-03   .2296580E-03
   .7606055E-04   .2103334E-03   .5237180E-03   .7495832E-03   .6992680E-03
   .2727003E-03  -.4115973E-03  -.1103445E-02  -.1629006E-02  -.1985980E-02
  -.2290732E-02  -.2624950E-02  -.2991642E-02  -.3353428E-02  -.3584635E-02
  -.3590137E-02  -.3485613E-02  -.3435261E-02  -.3487464E-02  -.3590043E-02
  -.3622397E-02  -.3490785E-02  -.3229728E-02  -.2923193E-02  -.2609491E-02
  -.2353991E-02  -.2197163E-02  -.2051469E-02  -.1817304E-02  -.1557491E-02
  -.1350210E-02  -.1269025E-02  -.1285037E-02  -.1295173E-02  -.1440023E-02
  -.1799352E-02  -.2339244E-02  -.2953527E-02  -.3427087E-02  -.3714509E-02
  -.3938274E-02  -.4167752E-02  -.4342241E-02  -.4364978E-02  -.4197041E-02
  -.3876363E-02  -.3563337E-02  -.3413434E-02  -.3364583E-02  -.3354794E-02
  -.3278184E-02  -.2999496E-02  -.2645959E-02  -.2356256E-02  -.2133452E-02
  -.2014424E-02  -.2059827E-02  -.2318400E-02  -.2738676E-02  -.3088269E-02
  -.3200814E-02  -.3073873E-02  -.2774593E-02  -.2444477E-02  -.2205698E-02
  -.2088449E-02  -.1999690E-02  -.1935167E-02  -.2035156E-02  -.2310033E-02
  -.2618875E-02  -.2817252E-02  -.2848315E-02  -.2651752E-02  -.2210550E-02
  -.1625614E-02  -.1071463E-02  -.6317467E-03  -.3130733E-03  -.5955275E-04
   .1586586E-03   .1162713E-03  -.2764559E-03  -.8349662E-03  -.1328539E-02
  -.1583753E-02  -.1578647E-02  -.1413987E-02  -.1224729E-02  -.1160127E-02
  -.1376588E-02  -.1829630E-02  -.2330772E-02  -.2712099E-02  -.2923167E-02
  -.3065964E-02  -.3146503E-02  -.3229394E-02  -.3454409E-02  -.3797355E-02
  -.4192835E-02  -.4561731E-02  -.4837575E-02  -.5036590E-02  -.5226032E-02
  -.5365589E-02  -.5310996E-02  -.5028850E-02  -.4677379E-02  -.4401515E-02
  -.4248673E-02  -.4254206E-02  -.4294274E-02  -.4272827E-02  -.4195800E-02
  -.4088179E-02  -.4054590E-02  -.4038199E-02  -.3902985E-02  -.3655865E-02
  -.3331396E-02  -.3095077E-02  -.3109179E-02  -.3284440E-02  -.3499410E-02
  -.3687362E-02  -.3781205E-02  -.3866279E-02  -.4093911E-02  -.4498789E-02
  -.5075993E-02  -.5578473E-02  -.5809743E-02  -.5841139E-02  -.5778333E-02
  -.5828762E-02  -.5945428E-02  -.5866273E-02  -.5598381E-02  -.5355657E-02
  -.5260396E-02  -.5287490E-02  -.5286719E-02  -.5095494E-02  -.4724416E-02
  -.4301588E-02  -.3934145E-02  -.3670020E-02  -.3455226E-02  -.3301620E-02
  -.3314937E-02  -.3397448E-02  -.3395959E-02  -.3348632E-02  -.3399232E-02
  -.3598358E-02  -.3894305E-02  -.4156133E-02  -.4292498E-02  -.4327991E-02
  -.4172982E-02  -.3746078E-02  -.3158360E-02  -.2577924E-02  -.2143103E-02
  -.1889180E-02  -.1758839E-02  -.1665237E-02  -.1565485E-02  -.1462836E-02
  -.1333462E-02  -.1230961E-02  -.1176938E-02  -.1164309E-02  -.1319954E-02
  -.1682186E-02  -.2164110E-02  -.2655966E-02  -.3026313E-02  -.3052001E-02
  -.2629508E-02  -.1984422E-02  -.1338718E-02  -.8693129E-03  -.6884886E-03
  -.6539339E-03  -.5852164E-03  -.4152601E-03  -.1572598E-03   .1333984E-03
   .3853957E-03   .6133790E-03   .8819796E-03   .1167655E-02   .1478242E-02
   .1809897E-02   .2115751E-02   .2402798E-02   .2703808E-02   .2990659E-02
   .3144999E-02   .3093719E-02   .2889460E-02   .2618131E-02   .2428760E-02
   .2367524E-02   .2343210E-02   .2354207E-02   .2369938E-02   .2401306E-02
   .2516074E-02   .2768892E-02   .3132862E-02   .3388386E-02   .3432950E-02
   .3277712E-02   .2927698E-02   .2514272E-02   .2133992E-02   .1851560E-02
   .1760734E-02   .1762196E-02   .1616535E-02   .1177313E-02   .5679085E-03
   .8403840E-04  -.7919795E-04   .1024524E-03   .4487153E-03   .6996421E-03
   .7134708E-03   .5572137E-03   .4322870E-03   .4967574E-03   .7394058E-03
   .1034399E-02   .1328961E-02   .1706704E-02   .2207570E-02   .2800477E-02
   .3444709E-02   .3965290E-02   .4227922E-02   .4240356E-02   .3958544E-02
   .3450756E-02   .2960388E-02   .2578604E-02   .2314660E-02   .2174150E-02
   .2075698E-02   .2083459E-02   .2237042E-02   .2398161E-02   .2501197E-02
   .2472197E-02   .2390384E-02   .2375189E-02   .2362542E-02   .2349814E-02
   .2308156E-02   .2218124E-02   .2075586E-02   .1898873E-02   .1781302E-02
   .1777011E-02   .1922930E-02   .2125166E-02   .2187826E-02   .1995741E-02
   .1687804E-02   .1490246E-02   .1542830E-02   .1923904E-02   .2497264E-02
   .3139532E-02   .3782729E-02   .4297014E-02   .4650576E-02   .4980022E-02
   .5322022E-02   .5595196E-02   .5853604E-02   .6054660E-02   .6164933E-02
   .6210665E-02   .6217934E-02   .6309810E-02   .6472944E-02   .6705190E-02
   .6945046E-02   .7094393E-02   .7254506E-02   .7431982E-02   .7581089E-02
   .7734991E-02   .7870632E-02   .7936970E-02   .7935006E-02   .7964572E-02
   .8226765E-02   .8717455E-02   .9269696E-02   .9788053E-02   .1008965E-01
   .1003591E-01   .9686599E-02   .9147659E-02   .8587259E-02   .8152357E-02
   .7766708E-02   .7218320E-02   .6413896E-02   .5538288E-02   .4815351E-02
   .4333296E-02   .3961065E-02   .3407797E-02   .2681175E-02   .2098462E-02
   .1857638E-02   .1880676E-02   .2030639E-02   .2186829E-02   .2229631E-02
   .2041759E-02   .1577245E-02   .1016815E-02   .6058931E-03   .4589117E-03
   .4959129E-03   .5582425E-03   .5927849E-03   .6167534E-03   .6480554E-03
   .6931800E-03   .6682696E-03   .5200487E-03   .3074618E-03   .1083856E-03
  -.1187791E-04  -.1082368E-03  -.2556233E-03  -.5197560E-03  -.9795150E-03
  -.1592151E-02  -.2167600E-02  -.2564085E-02  -.2841200E-02  -.2994737E-02
  -.3039525E-02  -.3178229E-02  -.3435446E-02  -.3658095E-02  -.3729751E-02
  -.3645860E-02  -.3539081E-02  -.3590016E-02  -.3963478E-02  -.4606706E-02
  -.5247250E-02  -.5565742E-02  -.5442338E-02  -.5130201E-02  -.4918944E-02
  -.4863720E-02  -.4989528E-02  -.5198316E-02  -.5352942E-02  -.5559840E-02
  -.5743881E-02  -.5692906E-02  -.5407372E-02  -.5024796E-02  -.4765989E-02
  -.4717153E-02  -.4661495E-02  -.4343721E-02  -.3782790E-02  -.3269249E-02
  -.2947962E-02  -.2776189E-02  -.2755832E-02  -.2829707E-02  -.2910170E-02
  -.2861381E-02  -.2684168E-02  -.2552400E-02  -.2580193E-02  -.2889529E-02
  -.3273252E-02  -.3343975E-02  -.3098187E-02  -.2757587E-02  -.2614848E-02
  -.2834421E-02  -.3212186E-02  -.3448593E-02  -.3476576E-02  -.3334939E-02
  -.3151763E-02  -.3026163E-02  -.2950659E-02  -.2942599E-02  -.2880999E-02
  -.2675735E-02  -.2428570E-02  -.2292167E-02  -.2402563E-02  -.2721308E-02
  -.3040233E-02  -.3211751E-02  -.3146899E-02  -.2750642E-02  -.2088571E-02
  -.1410236E-02  -.9295144E-03  -.7834524E-03  -.1029748E-02  -.1485948E-02
  -.1789616E-02  -.1763268E-02  -.1569756E-02  -.1451374E-02  -.1501239E-02
  -.1604931E-02  -.1552810E-02  -.1231645E-02  -.6614512E-03   .1803671E-04
   .5573991E-03   .7713292E-03   .6946157E-03   .5426284E-03   .5671844E-03
   .7750510E-03   .1039694E-02   .1288072E-02   .1458342E-02   .1564447E-02
   .1716782E-02   .1959539E-02   .2226942E-02   .2396408E-02   .2264466E-02
   .1866924E-02   .1393846E-02   .9156295E-03   .4820535E-03   .8859465E-04
  -.3622463E-03  -.9457321E-03  -.1625450E-02  -.2291705E-02  -.2831246E-02
  -.3215400E-02  -.3401036E-02  -.3439941E-02  -.3491511E-02  -.3583102E-02
  -.3771438E-02  -.4054573E-02  -.4257606E-02  -.4314898E-02  -.4282857E-02
  -.4258469E-02  -.4371891E-02  -.4624689E-02  -.4898522E-02  -.5011590E-02
  -.4843370E-02  -.4463717E-02  -.4059336E-02  -.3768307E-02  -.3492497E-02
  -.3027628E-02  -.2309418E-02  -.1395132E-02  -.4075874E-03   .5001536E-03
   .1154178E-02   .1478924E-02   .1671623E-02   .1932052E-02   .2294745E-02
   .2702757E-02   .3004385E-02   .3136084E-02   .3134320E-02   .3055676E-02
   .3022541E-02   .3140737E-02   .3435929E-02   .3809405E-02   .4111727E-02
   .4256676E-02   .4252537E-02   .4195847E-02   .4169242E-02   .4159600E-02
   .4169368E-02   .4186620E-02   .4163779E-02   .4146433E-02   .4167044E-02
   .4248008E-02   .4434179E-02   .4717175E-02   .5002560E-02   .5154520E-02
   .5144212E-02   .5031112E-02   .4876279E-02   .4739143E-02   .4627285E-02
   .4565383E-02   .4549218E-02   .4427800E-02   .4107340E-02   .3635463E-02
   .3147813E-02   .2814756E-02   .2697200E-02   .2686648E-02   .2609830E-02
   .2433697E-02   .2143127E-02   .1648005E-02   .9307505E-03   .1277495E-03
  -.4485022E-03  -.5945650E-03  -.3792289E-03   .1924881E-04   .4526037E-03
   .8358471E-03   .1101188E-02   .1239005E-02   .1366511E-02   .1578880E-02
   .1881103E-02   .2189476E-02   .2343593E-02   .2359578E-02   .2327345E-02
   .2227585E-02   .2030783E-02   .1764172E-02   .1570053E-02   .1599848E-02
   .1861016E-02   .2233647E-02   .2472369E-02   .2455231E-02   .2265525E-02
   .2019789E-02   .1852456E-02   .1745894E-02   .1609707E-02   .1435917E-02
   .1338971E-02   .1418911E-02   .1596751E-02   .1645519E-02   .1382591E-02
   .7894966E-03   .4310689E-04  -.5655389E-03  -.9828547E-03  -.1296626E-02
  -.1536838E-02  -.1628846E-02  -.1541561E-02  -.1401241E-02  -.1291632E-02
  -.1194300E-02  -.1030536E-02  -.6926711E-03  -.2065560E-03   .2617192E-03
   .5748047E-03   .6695362E-03   .5969504E-03   .4733493E-03   .4064130E-03
   .4192312E-03   .4267361E-03   .3425240E-03   .1396697E-03  -.1261025E-03
  -.3658071E-03  -.5982966E-03  -.8582948E-03  -.1082795E-02  -.1173348E-02
  -.1159299E-02  -.1250259E-02  -.1532398E-02  -.1910827E-02  -.2278738E-02
  -.2478822E-02  -.2444706E-02  -.2214203E-02  -.1871883E-02  -.1634140E-02
  -.1603646E-02  -.1733954E-02  -.1884556E-02  -.1905759E-02  -.1768318E-02
  -.1497456E-02  -.1231663E-02  -.1051381E-02  -.9560649E-03  -.9047265E-03
  -.7325604E-03  -.3574045E-03   .1907244E-03   .8046374E-03   .1252902E-02
   .1358068E-02   .1184199E-02   .9407348E-03   .7937901E-03   .8094328E-03
   .1022052E-02   .1346738E-02   .1546949E-02   .1448605E-02   .1066399E-02
   .5632659E-03   .1011913E-03  -.2526217E-03  -.5009915E-03  -.6399950E-03
  -.6775360E-03  -.6623805E-03  -.6750506E-03  -.7510287E-03  -.8626461E-03
  -.1032228E-02  -.1255848E-02  -.1443675E-02  -.1485868E-02  -.1343388E-02
  -.1109076E-02  -.9273798E-03  -.8977960E-03  -.1022461E-02  -.1147764E-02
  -.1131477E-02  -.9414580E-03  -.6234640E-03  -.3376521E-03  -.1930464E-03
  -.2047292E-03  -.3201829E-03  -.3969230E-03  -.3185026E-03  -.7447528E-04
   .2616116E-03   .5383785E-03   .6012669E-03   .4059312E-03   .5039260E-04
  -.2915876E-03  -.4833932E-03  -.5124808E-03  -.4481975E-03  -.4339494E-03
  -.6508104E-03  -.1056729E-02  -.1388384E-02  -.1473626E-02  -.1347037E-02
  -.1137394E-02  -.9865968E-03  -.9755323E-03  -.1167296E-02  -.1566498E-02
  -.2049430E-02  -.2476882E-02  -.2695591E-02  -.2675413E-02  -.2562813E-02
  -.2529818E-02  -.2675876E-02  -.2888071E-02  -.2977179E-02  -.2929865E-02
  -.2858105E-02  -.2842108E-02  -.2872368E-02  -.2879308E-02  -.2806500E-02
  -.2607527E-02  -.2302385E-02  -.1986732E-02  -.1702018E-02  -.1422038E-02
  -.1171162E-02  -.1051142E-02  -.1080569E-02  -.1214717E-02  -.1314536E-02
  -.1256574E-02  -.1164891E-02  -.1176678E-02  -.1360398E-02  -.1682730E-02
  -.1939639E-02  -.2045601E-02  -.2138201E-02  -.2315183E-02  -.2502663E-02
  -.2631975E-02  -.2673718E-02  -.2570386E-02  -.2396682E-02  -.2395493E-02
  -.2736112E-02  -.3280379E-02  -.3713101E-02  -.3791574E-02  -.3481738E-02
  -.3012464E-02  -.2636022E-02  -.2495374E-02  -.2613209E-02  -.2846187E-02
  -.3041479E-02  -.3093127E-02  -.2980226E-02  -.2811509E-02  -.2704212E-02
  -.2767138E-02  -.3067851E-02  -.3486017E-02  -.3692322E-02  -.3466932E-02
  -.2947339E-02  -.2392150E-02  -.2001592E-02  -.1857173E-02  -.1852234E-02
  -.1821933E-02  -.1683895E-02  -.1518709E-02  -.1467539E-02  -.1610143E-02
  -.1934807E-02  -.2271589E-02  -.2448487E-02  -.2470186E-02  -.2426153E-02
  -.2405084E-02  -.2413387E-02  -.2343951E-02  -.2146750E-02  -.1859809E-02
  -.1594550E-02  -.1454851E-02  -.1450055E-02  -.1563312E-02  -.1715880E-02
  -.1838658E-02  -.1966250E-02  -.2091326E-02  -.2146721E-02  -.2111409E-02
  -.1984377E-02  -.1807432E-02  -.1552482E-02  -.1153468E-02  -.7072569E-03
  -.4040908E-03  -.3849573E-03  -.5167109E-03  -.5028552E-03  -.1974534E-03
   .3829583E-03   .1122068E-02   .1788083E-02   .2189214E-02   .2402565E-02
   .2584633E-02   .2777697E-02   .2991109E-02   .3224651E-02   .3447132E-02
   .3589713E-02   .3569750E-02   .3399197E-02   .3210275E-02   .3130905E-02
   .3154403E-02   .3183419E-02   .3187717E-02   .3117956E-02   .2875247E-02
   .2530052E-02   .2298308E-02   .2305627E-02   .2486028E-02   .2673370E-02
   .2712654E-02   .2619451E-02   .2563236E-02   .2643206E-02   .2850105E-02
   .3145951E-02   .3490490E-02   .3795468E-02   .3983655E-02   .4115247E-02
   .4297950E-02   .4575344E-02   .4937238E-02   .5354944E-02   .5784876E-02
   .6154020E-02   .6437974E-02   .6652636E-02   .6824595E-02   .7013038E-02
   .7240908E-02   .7496695E-02   .7742868E-02   .7904874E-02   .7978123E-02
   .7967214E-02   .7890197E-02   .7790170E-02   .7678045E-02   .7642075E-02
   .7753300E-02   .7921606E-02   .7994703E-02   .7932938E-02   .7778560E-02
   .7553277E-02   .7262854E-02   .6874329E-02   .6354596E-02   .5694624E-02
   .4903163E-02   .4057328E-02   .3287349E-02   .2701228E-02   .2323147E-02
   .2090454E-02   .1835341E-02   .1432181E-02   .9361076E-03   .5186003E-03
   .2823374E-03   .1651683E-03   .9686986E-04   .6309271E-04   .6517451E-04
   .1008520E-03   .1442116E-03   .1473769E-03   .9549050E-04   .4868356E-04
   .6555415E-04   .1447413E-03   .2755554E-03   .4285628E-03   .5346195E-03
   .5437535E-03   .4251212E-03   .2022082E-03   .4044520E-04   .1122097E-03
   .3820122E-03   .6618602E-03   .8095655E-03   .7994469E-03   .7161664E-03
   .6721745E-03   .7237143E-03   .8959703E-03   .1236932E-02   .1713252E-02
   .2185931E-02   .2609817E-02   .2993474E-02   .3313881E-02   .3546746E-02
   .3567879E-02   .3168075E-02   .2358565E-02   .1426880E-02   .6786970E-03
   .2538837E-03   .8930757E-04   .9067464E-04   .1910384E-03   .3334779E-03
   .4687783E-03   .4905785E-03   .3895544E-03   .3069687E-03   .3661298E-03
   .6060735E-03   .8823410E-03   .1024531E-02   .1048239E-02   .1007130E-02
   .9541420E-03   .9334980E-03   .8959692E-03   .7560654E-03   .4684644E-03
   .8384671E-05  -.5468620E-03  -.1022697E-02  -.1336718E-02  -.1490264E-02
  -.1534711E-02  -.1544392E-02  -.1575136E-02  -.1640604E-02  -.1731123E-02
  -.1927512E-02  -.2304470E-02  -.2754376E-02  -.3043223E-02  -.3061567E-02
  -.2887389E-02  -.2629770E-02  -.2364581E-02  -.2089916E-02  -.1786766E-02
  -.1521387E-02  -.1359689E-02  -.1329769E-02  -.1376539E-02  -.1402739E-02
  -.1419179E-02  -.1488021E-02  -.1675064E-02  -.1999205E-02  -.2387201E-02
  -.2745990E-02  -.2985040E-02  -.3002335E-02  -.2877962E-02  -.2898675E-02
  -.3194396E-02  -.3690759E-02  -.4227756E-02  -.4590864E-02  -.4701908E-02
  -.4658700E-02  -.4565419E-02  -.4491882E-02  -.4443056E-02  -.4354701E-02
  -.4251128E-02  -.4211573E-02  -.4225856E-02  -.4284555E-02  -.4392364E-02
  -.4518091E-02  -.4616868E-02  -.4640703E-02  -.4558435E-02  -.4384629E-02
  -.4246137E-02  -.4224185E-02  -.4279059E-02  -.4320614E-02  -.4219030E-02
  -.3936439E-02  -.3570993E-02  -.3289087E-02  -.3139575E-02  -.2994451E-02
  -.2729612E-02  -.2327951E-02  -.1978468E-02  -.1886674E-02  -.2013243E-02
  -.2258529E-02  -.2528286E-02  -.2682412E-02  -.2708830E-02  -.2708413E-02
  -.2691895E-02  -.2563863E-02  -.2272629E-02  -.1909936E-02  -.1676961E-02
  -.1677859E-02  -.1775010E-02  -.1816600E-02  -.1791203E-02  -.1767037E-02
  -.1836661E-02  -.2027887E-02  -.2210404E-02  -.2180432E-02  -.1933113E-02
  -.1577913E-02  -.1205227E-02  -.8849456E-03  -.6191112E-03  -.4144748E-03
  -.2618212E-03  -.1132182E-03   .3791664E-04   .1513807E-03   .1640859E-03
   .5583011E-04  -.7191938E-04  -.8287638E-04   .5215732E-04   .2070219E-03
   .2974482E-03   .3404149E-03   .2800576E-03   .8039302E-04  -.1687903E-03
  -.4084543E-03  -.6003551E-03  -.7970998E-03  -.1143413E-02  -.1608359E-02
  -.2115683E-02  -.2565978E-02  -.2811668E-02  -.2816364E-02  -.2611491E-02
  -.2327901E-02  -.2186116E-02  -.2236685E-02  -.2373463E-02  -.2488047E-02
  -.2446922E-02  -.2313120E-02  -.2233360E-02  -.2213854E-02  -.2270615E-02
  -.2335460E-02  -.2363193E-02  -.2386152E-02  -.2394002E-02  -.2353788E-02
  -.2245742E-02  -.2105508E-02  -.1968819E-02  -.1965244E-02  -.2118735E-02
  -.2264204E-02  -.2293960E-02  -.2181527E-02  -.1966342E-02  -.1708999E-02
  -.1406185E-02  -.1131098E-02  -.1012115E-02  -.8984175E-03  -.6037543E-03
  -.1638452E-03   .2878275E-03   .6316392E-03   .8141988E-03   .8557119E-03
   .8328733E-03   .8205525E-03   .7888193E-03   .6936088E-03   .5943324E-03
   .4803878E-03   .4215330E-03   .5262713E-03   .6761773E-03   .7636839E-03
   .7923373E-03   .7481168E-03   .7250577E-03   .8126647E-03   .9144671E-03
   .9362527E-03   .9455164E-03   .1067641E-02   .1248245E-02   .1341251E-02
   .1225113E-02   .9108519E-03   .5021444E-03  -.2108119E-04  -.5917992E-03
  -.1158831E-02  -.1724636E-02  -.2185888E-02  -.2482685E-02  -.2599088E-02
  -.2610498E-02  -.2663703E-02  -.2801866E-02  -.2956886E-02  -.3104753E-02
  -.3216654E-02  -.3200505E-02  -.3067834E-02  -.2939752E-02  -.2950694E-02
  -.3119775E-02  -.3358865E-02  -.3521547E-02  -.3453127E-02  -.3273121E-02
  -.3263045E-02  -.3450794E-02  -.3635540E-02  -.3668454E-02  -.3510497E-02
  -.3280139E-02  -.3147604E-02  -.3176548E-02  -.3320606E-02  -.3408960E-02
  -.3374884E-02  -.3288919E-02  -.3263754E-02  -.3396461E-02  -.3609059E-02
  -.3767947E-02  -.3739472E-02  -.3547544E-02  -.3361272E-02  -.3185855E-02
  -.2927527E-02  -.2598872E-02  -.2314402E-02  -.2139114E-02  -.1977197E-02
  -.1733332E-02  -.1493853E-02  -.1234736E-02  -.9060021E-03  -.5968595E-03
  -.3374320E-03  -.7577871E-04   .1782787E-03   .3357231E-03   .3214107E-03
   .1415501E-03  -.8762149E-04  -.3416810E-03  -.5926995E-03  -.7579556E-03
  -.8515779E-03  -.9504353E-03  -.1093657E-02  -.1259712E-02  -.1487829E-02
  -.1796787E-02  -.2184974E-02  -.2573238E-02  -.2868874E-02  -.3048848E-02
  -.3068207E-02  -.2933632E-02  -.2700998E-02  -.2469513E-02  -.2313715E-02
  -.2238303E-02  -.2168903E-02  -.2087725E-02  -.2045039E-02  -.1956893E-02
  -.1789601E-02  -.1621354E-02  -.1521191E-02  -.1538031E-02  -.1575818E-02
  -.1533248E-02  -.1330011E-02  -.1014857E-02  -.8686305E-03  -.1026423E-02
  -.1361146E-02  -.1682657E-02  -.1763173E-02  -.1588192E-02  -.1470604E-02
  -.1552603E-02  -.1760240E-02  -.1990027E-02  -.2165963E-02  -.2286549E-02
  -.2416309E-02  -.2530032E-02  -.2548245E-02  -.2582230E-02  -.2650044E-02
  -.2662257E-02  -.2593935E-02  -.2365651E-02  -.2016797E-02  -.1722101E-02
  -.1522729E-02  -.1302439E-02  -.9493925E-03  -.4117336E-03   .1757114E-03
   .5635526E-03   .7852947E-03   .9951706E-03   .1190298E-02   .1330888E-02
   .1386841E-02   .1445598E-02   .1571229E-02   .1676794E-02   .1712857E-02
   .1663113E-02   .1555416E-02   .1458807E-02   .1419327E-02   .1414548E-02
   .1450523E-02   .1560902E-02   .1722220E-02   .1961823E-02   .2177809E-02
   .2193086E-02   .2033802E-02   .1771455E-02   .1479147E-02   .1280479E-02
   .1203457E-02   .1208670E-02   .1222780E-02   .1239789E-02   .1323688E-02
   .1367643E-02   .1329576E-02   .1214324E-02   .9993831E-03   .8516311E-03
   .7645270E-03   .6355904E-03   .5565390E-03   .5602435E-03   .5556746E-03
   .4937715E-03   .4095597E-03   .2810018E-03   .6249832E-04  -.2459327E-03
  -.5548901E-03  -.6707879E-03  -.5405262E-03  -.2964608E-03  -.1764248E-03
  -.3274311E-03  -.6432200E-03  -.9486068E-03  -.1137091E-02  -.1265015E-02
  -.1338456E-02  -.1315167E-02  -.1263694E-02  -.1137360E-02  -.9213438E-03
  -.6663941E-03  -.3540657E-03  -.8548797E-05   .3326807E-03   .6581999E-03
   .9496372E-03   .1189292E-02   .1419079E-02   .1664986E-02   .1859824E-02
   .1983168E-02   .2080172E-02   .2209962E-02   .2450106E-02   .2734567E-02
   .2956384E-02   .3098264E-02   .3158346E-02   .3155182E-02   .3083347E-02
   .2933103E-02   .2704790E-02   .2520390E-02   .2522627E-02   .2585871E-02
   .2540928E-02   .2436184E-02   .2401790E-02   .2529742E-02   .2728056E-02
   .2745405E-02   .2521349E-02   .2200596E-02   .1977857E-02   .1927296E-02
   .1922814E-02   .1878597E-02   .1763992E-02   .1634357E-02   .1606318E-02
   .1697453E-02   .1896871E-02   .2131990E-02   .2321248E-02   .2462304E-02
   .2595753E-02   .2737417E-02   .2837586E-02   .2899913E-02   .2967452E-02
   .3081797E-02   .3240909E-02   .3372590E-02   .3453456E-02   .3476054E-02
   .3441815E-02   .3441409E-02   .3515224E-02   .3615764E-02   .3722376E-02
   .3812467E-02   .3894486E-02   .4009874E-02   .4159544E-02   .4334121E-02
   .4502204E-02   .4572768E-02   .4496297E-02   .4324686E-02   .4197492E-02
   .4286333E-02   .4556596E-02   .4835411E-02   .5081905E-02   .5256605E-02
   .5230257E-02   .4997921E-02   .4694158E-02   .4438613E-02   .4288539E-02
   .4180319E-02   .4050008E-02   .3923915E-02   .3747543E-02   .3446278E-02
   .3050888E-02   .2664611E-02   .2348293E-02   .2085036E-02   .1907264E-02
   .1773205E-02   .1597747E-02   .1391333E-02   .1232447E-02   .1181307E-02
   .1216750E-02   .1388073E-02   .1691648E-02   .2025129E-02   .2330342E-02
   .2545210E-02   .2647588E-02   .2641951E-02   .2578238E-02   .2518877E-02
   .2445156E-02   .2436277E-02   .2463247E-02   .2382979E-02   .2296496E-02
   .2251687E-02   .2177847E-02   .2122826E-02   .2108934E-02   .2122450E-02
   .2200429E-02   .2313695E-02   .2400758E-02   .2433332E-02   .2390619E-02
   .2222823E-02   .1947515E-02   .1731701E-02   .1639597E-02   .1620070E-02
   .1553610E-02   .1331265E-02   .1093948E-02   .1017177E-02   .1100074E-02
   .1287636E-02   .1500170E-02   .1645722E-02   .1728028E-02   .1804031E-02
   .1920498E-02   .2042259E-02   .2093962E-02   .2088422E-02   .2002891E-02
   .1874931E-02   .1808539E-02   .1834405E-02   .1919485E-02   .1916602E-02
   .1751333E-02   .1542132E-02   .1461098E-02   .1536026E-02   .1692315E-02
   .1827564E-02   .1898902E-02   .2038283E-02   .2221466E-02   .2334816E-02
   .2310732E-02   .2162654E-02   .2044925E-02   .1981660E-02   .1989620E-02
   .2019164E-02   .1912517E-02   .1656732E-02   .1384296E-02   .1251570E-02
   .1251658E-02   .1288479E-02   .1329817E-02   .1280921E-02   .1058766E-02
   .7548100E-03   .4856920E-03   .3415351E-03   .3030039E-03   .3113816E-03
   .3777387E-03   .4247371E-03   .4839155E-03   .6217820E-03   .7346755E-03
   .8292241E-03   .9031337E-03   .9193726E-03   .9568834E-03   .1041667E-02
   .1166552E-02   .1323970E-02   .1442847E-02   .1465337E-02   .1396809E-02
   .1280879E-02   .1184563E-02   .1113695E-02   .9787251E-03   .6729522E-03
   .2216929E-03  -.2530204E-03  -.5864324E-03  -.7066590E-03  -.6733788E-03
  -.5089523E-03  -.3237744E-03  -.1693710E-03  -.2075288E-04   .8930858E-04
   .2091634E-03   .3197068E-03   .3367249E-03   .2717983E-03   .1212297E-03
  -.8024176E-04  -.2321864E-03  -.3736381E-03  -.6437563E-03  -.1003423E-02
  -.1273137E-02  -.1315259E-02  -.1108611E-02  -.8112064E-03  -.5843576E-03
  -.4888113E-03  -.4840007E-03  -.4915068E-03  -.4542131E-03  -.3834930E-03
  -.3145055E-03  -.1397070E-03   .1759401E-03   .4679783E-03   .5868359E-03
   .5098811E-03   .3181233E-03   .1558093E-03   .1386730E-03   .2321537E-03
   .2985307E-03   .2574240E-03   .1381010E-03   .5740374E-04   .1396774E-03
   .3292476E-03   .4824301E-03   .5238424E-03   .4930081E-03   .5140459E-03
   .5501052E-03   .5192193E-03   .4404128E-03   .3263425E-03   .2348465E-03
   .2470296E-03   .3832130E-03   .5584715E-03   .6255424E-03   .6692971E-03
   .8749920E-03   .1088735E-02   .1095914E-02   .9287162E-03   .7483115E-03
   .7032101E-03   .7702082E-03   .8449098E-03   .9081235E-03   .9348193E-03
   .8248373E-03   .5492718E-03   .2261340E-03  -.1660234E-04  -.1250217E-03
  -.4627158E-04   .2298796E-03   .6196929E-03   .9229882E-03   .9291039E-03
   .6606847E-03   .2516803E-03  -.1240515E-03  -.2516725E-03  -.1444719E-03
  -.2313977E-04  -.1216430E-04  -.8618367E-04  -.2453184E-03  -.5042974E-03
  -.7185993E-03  -.7214647E-03  -.5110212E-03  -.2012993E-03   .7287030E-04
   .2522893E-03   .2748273E-03   .1040472E-03  -.2107298E-03  -.5377811E-03
  -.6464402E-03  -.4704813E-03  -.2335812E-03  -.1350416E-03  -.2100480E-03
  -.3628737E-03  -.4443095E-03  -.4980938E-03  -.6104094E-03  -.8274725E-03
  -.1198192E-02  -.1646925E-02  -.2039157E-02  -.2280611E-02  -.2425272E-02
  -.2574512E-02  -.2698788E-02  -.2776358E-02  -.2824358E-02  -.2856559E-02
  -.2878019E-02  -.2847929E-02  -.2730653E-02  -.2491757E-02  -.2175841E-02
  -.1919279E-02  -.1838698E-02  -.1916742E-02  -.2039408E-02  -.2085621E-02
  -.1946575E-02  -.1687754E-02  -.1492794E-02  -.1433049E-02  -.1452222E-02
  -.1479551E-02  -.1531562E-02  -.1588905E-02  -.1546759E-02  -.1455002E-02
  -.1453597E-02  -.1520553E-02  -.1556448E-02  -.1513776E-02  -.1416250E-02
  -.1378221E-02  -.1430071E-02  -.1469836E-02  -.1444548E-02  -.1374521E-02
  -.1335096E-02  -.1362474E-02  -.1442351E-02  -.1559269E-02  -.1643308E-02
  -.1626200E-02  -.1507134E-02  -.1385176E-02  -.1397032E-02  -.1605589E-02
  -.1940574E-02  -.2224450E-02  -.2312985E-02  -.2186627E-02  -.1929324E-02
  -.1705270E-02  -.1623679E-02  -.1722144E-02  -.1952107E-02  -.2129977E-02
  -.2129755E-02  -.1957111E-02  -.1665725E-02  -.1315216E-02  -.1017390E-02
  -.8207952E-03  -.6956908E-03  -.5771007E-03  -.3775973E-03  -.1697384E-03
  -.1114987E-03  -.2237484E-03  -.3743878E-03  -.4683394E-03  -.5073072E-03
  -.4785801E-03  -.4186380E-03  -.4440023E-03  -.5972713E-03  -.7873185E-03
  -.9147635E-03  -.9384922E-03  -.8973354E-03  -.9261920E-03  -.1076012E-02
  -.1243147E-02  -.1303523E-02  -.1206448E-02  -.9938656E-03  -.8035517E-03
  -.7556333E-03  -.8082554E-03  -.8327908E-03  -.6844613E-03  -.3195242E-03
   .6815683E-04   .2300819E-03   .8704723E-04  -.2434103E-03  -.6057754E-03
  -.8867254E-03  -.1053600E-02  -.1160675E-02  -.1214638E-02  -.1250567E-02
  -.1322783E-02  -.1431269E-02  -.1573906E-02  -.1753641E-02  -.2008242E-02
  -.2317267E-02  -.2559615E-02  -.2648101E-02  -.2586302E-02  -.2467573E-02
  -.2417157E-02  -.2457626E-02  -.2595351E-02  -.2864123E-02  -.3146353E-02
  -.3324332E-02  -.3373730E-02  -.3315287E-02  -.3258669E-02  -.3287941E-02
  -.3379563E-02  -.3404311E-02  -.3272115E-02  -.3070391E-02  -.2976997E-02
  -.3102030E-02  -.3346016E-02  -.3530256E-02  -.3595425E-02  -.3558179E-02
  -.3418865E-02  -.3221206E-02  -.3046824E-02  -.2922040E-02  -.2874024E-02
  -.2862627E-02  -.2789242E-02  -.2663739E-02  -.2615631E-02  -.2768193E-02
  -.3064340E-02  -.3308155E-02  -.3381638E-02  -.3348400E-02  -.3366341E-02
  -.3507467E-02  -.3756342E-02  -.4011274E-02  -.4124500E-02  -.4082723E-02
  -.3947448E-02  -.3818535E-02  -.3839545E-02  -.4003625E-02  -.4170701E-02
  -.4220794E-02  -.4101233E-02  -.3847570E-02  -.3533964E-02  -.3300169E-02
  -.3281980E-02  -.3364470E-02  -.3356036E-02  -.3207718E-02  -.2958531E-02
  -.2664425E-02  -.2364541E-02  -.2119821E-02  -.1944521E-02  -.1834572E-02
  -.1740744E-02  -.1587601E-02  -.1400487E-02  -.1301264E-02  -.1330734E-02
  -.1350418E-02  -.1251051E-02  -.9886614E-03  -.6882197E-03  -.5942891E-03
  -.6993068E-03  -.8452287E-03  -.9323021E-03  -.9710844E-03  -.1057962E-02
  -.1191777E-02  -.1329044E-02  -.1382853E-02  -.1271717E-02  -.1042307E-02
  -.7208597E-03  -.3314454E-03   .3642891E-04   .2881998E-03   .3620549E-03
   .3072933E-03   .2480304E-03   .2379884E-03   .2247586E-03   .2030924E-03
   .2584323E-03   .3905627E-03   .5507930E-03   .6889426E-03   .7598084E-03
   .7439488E-03   .6834812E-03   .6181984E-03   .5365104E-03   .4185840E-03
   .2474526E-03   .9282155E-04  -.8037763E-05  -.6260370E-04  -.4836808E-04
   .5553680E-04   .2341814E-03   .4385950E-03   .6159486E-03   .7029271E-03
   .6737555E-03   .6440907E-03   .7838061E-03   .1090075E-02   .1420369E-02
   .1615400E-02   .1647761E-02   .1636572E-02   .1705000E-02   .1938800E-02
   .2285915E-02   .2548212E-02   .2532812E-02   .2267363E-02   .1939921E-02
   .1706921E-02   .1644748E-02   .1709090E-02   .1847606E-02   .2020540E-02
   .2160449E-02   .2253215E-02   .2298963E-02   .2270252E-02   .2233040E-02
   .2237418E-02   .2263469E-02   .2328025E-02   .2384657E-02   .2352555E-02
   .2216368E-02   .2003795E-02   .1777746E-02   .1644025E-02   .1605015E-02
   .1589107E-02   .1494097E-02   .1206113E-02   .8445837E-03   .5776735E-03
   .4556091E-03   .5000184E-03   .6246177E-03   .6915241E-03   .6798235E-03
   .6878118E-03   .8447037E-03   .1159332E-02   .1452893E-02   .1618043E-02
   .1675319E-02   .1627962E-02   .1546058E-02   .1445233E-02   .1290396E-02
   .1137528E-02   .1034171E-02   .1005292E-02   .1039753E-02   .1159249E-02
   .1363155E-02   .1492833E-02   .1406640E-02   .1102337E-02   .6908560E-03
   .3694962E-03   .2466272E-03   .2246991E-03   .1557154E-03   .3250153E-04
  -.5741427E-04  -.5295551E-04   .9621310E-05   .3916700E-04   .2971906E-04
  -.1564963E-04  -.1354608E-03  -.3345276E-03  -.5559882E-03  -.7379569E-03
  -.8537180E-03  -.8562869E-03  -.8029770E-03  -.8347711E-03  -.9584966E-03
  -.1134120E-02  -.1331127E-02  -.1456073E-02  -.1462064E-02  -.1389667E-02
  -.1262832E-02  -.1128262E-02  -.1015953E-02  -.9437009E-03  -.9503810E-03
  -.1038804E-02  -.1152956E-02  -.1194310E-02  -.1132696E-02  -.1031712E-02
  -.1001365E-02  -.1054459E-02  -.1120793E-02  -.1146982E-02  -.1112001E-02
  -.1090228E-02  -.1159433E-02  -.1237032E-02  -.1232842E-02  -.1162459E-02
  -.1053813E-02  -.9506858E-03  -.8647504E-03  -.8183104E-03  -.8517131E-03
  -.9155243E-03  -.8980605E-03  -.7488929E-03  -.5496580E-03  -.3957372E-03
  -.2958240E-03  -.1996374E-03  -.9402210E-04  -.8873510E-04  -.2055008E-03
  -.2656433E-03  -.1698364E-03   .7112604E-04   .3732182E-03   .6071224E-03
   .7183046E-03   .6708942E-03   .5574176E-03   .5292338E-03   .5893580E-03
   .7234007E-03   .9205551E-03   .1117844E-02   .1274551E-02   .1410858E-02
   .1565243E-02   .1770635E-02   .1991007E-02   .2100741E-02   .2060119E-02
   .1955176E-02   .1883224E-02   .1887867E-02   .1955920E-02   .2014436E-02
   .1990243E-02   .1888836E-02   .1770409E-02   .1753108E-02   .1913983E-02
   .2213558E-02   .2533570E-02   .2721261E-02   .2748135E-02   .2742570E-02
   .2845503E-02   .3055120E-02   .3295788E-02   .3565226E-02   .3821891E-02
   .3993432E-02   .4069041E-02   .4086842E-02   .4117341E-02   .4120290E-02
   .3937497E-02   .3527923E-02   .3067173E-02   .2787150E-02   .2721589E-02
   .2701370E-02   .2613885E-02   .2459935E-02   .2286730E-02   .2182713E-02
   .2179809E-02   .2206366E-02   .2163480E-02   .2017168E-02   .1835861E-02
   .1701061E-02   .1624284E-02   .1593905E-02   .1562260E-02   .1501846E-02
   .1474125E-02   .1468875E-02   .1409939E-02   .1291805E-02   .1126860E-02
   .9581701E-03   .8317066E-03   .7158338E-03   .6112691E-03   .6002567E-03
   .7305425E-03   .8933774E-03   .9904311E-03   .9563385E-03   .7668723E-03
   .5823587E-03   .4490851E-03   .3899635E-03   .5224020E-03   .7850163E-03
   .1006930E-02   .1043698E-02   .8649829E-03   .6558529E-03   .6346977E-03
   .7313645E-03   .7236004E-03   .5497291E-03   .2466510E-03  -.2839318E-04
  -.7839130E-04  -.1885870E-05   .3694137E-04  -.2048348E-04  -.1750818E-03
  -.2892911E-03  -.2836703E-03  -.1601685E-03   .4550996E-04   .2028850E-03
   .2537376E-03   .2538307E-03   .2787594E-03   .3313177E-03   .3136301E-03
   .1723234E-03  -.5909920E-04  -.3179586E-03  -.5485464E-03  -.7099029E-03
  -.7773368E-03  -.7389055E-03  -.6483993E-03  -.6020187E-03  -.6163886E-03
  -.6943456E-03  -.8002511E-03  -.8717347E-03  -.9639100E-03  -.1052415E-02
  -.1059156E-02  -.1020126E-02  -.9606064E-03  -.9226392E-03  -.9154323E-03
  -.9105870E-03  -.9214967E-03  -.9564068E-03  -.1030177E-02  -.1086083E-02
  -.1039846E-02  -.9143939E-03  -.8201908E-03  -.8224679E-03  -.8585339E-03
  -.8640177E-03  -.7924810E-03  -.5834599E-03  -.2580938E-03   .8364361E-04
   .2831794E-03   .2992398E-03   .3499079E-03   .5343301E-03   .7438151E-03
   .9323218E-03   .1052559E-02   .1112805E-02   .1160933E-02   .1162462E-02
   .1110616E-02   .1050617E-02   .1047159E-02   .1135607E-02   .1296342E-02
   .1418951E-02   .1394632E-02   .1256297E-02   .1106772E-02   .1043797E-02
   .1092785E-02   .1232701E-02   .1429967E-02   .1580804E-02   .1610409E-02
   .1570850E-02   .1533410E-02   .1529073E-02   .1567254E-02   .1664132E-02
   .1855829E-02   .2135685E-02   .2472513E-02   .2757643E-02   .2852892E-02
   .2743775E-02   .2489188E-02   .2235494E-02   .2213537E-02   .2501995E-02
   .2851753E-02   .2920656E-02   .2661020E-02   .2300211E-02   .2039633E-02
   .1977439E-02   .2098941E-02   .2209373E-02   .2132502E-02   .1867836E-02
   .1527772E-02   .1299182E-02   .1329101E-02   .1579757E-02   .1828254E-02
   .1780303E-02   .1406727E-02   .9906721E-03   .7826789E-03   .8592547E-03
   .1029939E-02   .1064035E-02   .9122942E-03   .6748204E-03   .5865441E-03
   .7276010E-03   .9099993E-03   .9488104E-03   .8357623E-03   .7052498E-03
   .7064819E-03   .8709429E-03   .1189877E-02   .1592895E-02   .1839684E-02
   .1743870E-02   .1423119E-02   .1194218E-02   .1248462E-02   .1524590E-02
   .1829468E-02   .1958596E-02   .1813940E-02   .1480457E-02   .1197135E-02
   .1154064E-02   .1283686E-02   .1432549E-02   .1459334E-02   .1323507E-02
   .1134071E-02   .9699213E-03   .8830032E-03   .8954251E-03   .9850150E-03
   .1114752E-02   .1229545E-02   .1303939E-02   .1342989E-02   .1360326E-02
   .1411556E-02   .1522104E-02   .1662865E-02   .1764323E-02   .1705210E-02
   .1468960E-02   .1143792E-02   .8094297E-03   .5283805E-03   .3202575E-03
   .1541574E-03  -.4324359E-05  -.1748536E-03  -.3728411E-03  -.5252641E-03
  -.5943115E-03  -.6467260E-03  -.7061057E-03  -.7845708E-03  -.8646874E-03
  -.9270897E-03  -.9680229E-03  -.9582606E-03  -.8329558E-03  -.5654453E-03
  -.3365746E-03  -.2814413E-03  -.3498870E-03  -.5131815E-03  -.7426690E-03
  -.9599086E-03  -.1073394E-02  -.1054019E-02  -.9354342E-03  -.7984673E-03
  -.7117939E-03  -.7078297E-03  -.8148886E-03  -.9781497E-03  -.1135006E-02
  -.1298031E-02  -.1459009E-02  -.1527750E-02  -.1518874E-02  -.1488264E-02
  -.1384119E-02  -.1230301E-02  -.1132158E-02  -.1123577E-02  -.1144146E-02
  -.1142151E-02  -.1093391E-02  -.9783440E-03  -.8039492E-03  -.6914181E-03
  -.7700849E-03  -.9428462E-03  -.9764883E-03  -.8019649E-03  -.6062556E-03
  -.5481292E-03  -.6446579E-03  -.8280954E-03  -.9442453E-03  -.8945461E-03
  -.7579157E-03  -.6277128E-03  -.5244180E-03  -.4991464E-03  -.5660442E-03
  -.7001760E-03  -.8120781E-03  -.8297068E-03  -.7874934E-03  -.7228483E-03
  -.6715189E-03  -.6281410E-03  -.5562706E-03  -.4943554E-03  -.5261312E-03
  -.6472021E-03  -.7956881E-03  -.9283209E-03  -.9622794E-03  -.8308406E-03
  -.5951653E-03  -.3376682E-03  -.1189525E-03  -.1412346E-04  -.6316577E-04
  -.2281895E-03  -.3995656E-03  -.4662700E-03  -.4394551E-03  -.4579345E-03
  -.6036004E-03  -.8259973E-03  -.1002859E-02  -.1111894E-02  -.1231345E-02
  -.1346045E-02  -.1430716E-02  -.1427768E-02  -.1313725E-02  -.1261876E-02
  -.1415098E-02  -.1726991E-02  -.1966521E-02  -.1983223E-02  -.1892144E-02
  -.1828506E-02  -.1838091E-02  -.1871861E-02  -.1797616E-02  -.1595402E-02
  -.1362497E-02  -.1182991E-02  -.1057393E-02  -.9659021E-03  -.9035324E-03
  -.8430188E-03  -.8098273E-03  -.8572997E-03  -.1030442E-02  -.1239268E-02
  -.1336412E-02  -.1315923E-02  -.1189709E-02  -.9945781E-03  -.8355712E-03
  -.7625752E-03  -.7433290E-03  -.6869658E-03  -.5625003E-03  -.4106893E-03
  -.2709593E-03  -.1916725E-03  -.1455277E-03  -.8564637E-04  -.2882199E-04
  -.4117736E-05  -.8200647E-04  -.3002055E-03  -.5179965E-03  -.5993192E-03
  -.5470647E-03  -.3989117E-03  -.2275015E-03  -.1146547E-03  -.5606206E-04
   .3602470E-05   .8296639E-04   .1200530E-03   .6603766E-04  -.3403524E-04
  -.1369294E-03  -.2067255E-03  -.1794058E-03  -.1161110E-04   .2851631E-03
   .6489169E-03   .9498660E-03   .1066018E-02   .1064088E-02   .1086096E-02
   .1110108E-02   .9914126E-03   .6833717E-03   .3236778E-03   .9842257E-04
   .1087344E-03   .3213854E-03   .5961415E-03   .7329870E-03   .6135146E-03
   .3141198E-03   .3372318E-04  -.4071181E-04   .1438069E-03   .4381043E-03
   .6098227E-03   .5862022E-03   .4862201E-03   .4826629E-03   .6599959E-03
   .9148600E-03   .1052117E-02   .1005762E-02   .8473209E-03   .6888621E-03
   .6418164E-03   .7268144E-03   .8548583E-03   .8757066E-03   .6879423E-03
   .3512922E-03   .3557157E-04  -.9021331E-04   .9365995E-05   .2482713E-03
   .5276890E-03   .7461129E-03   .8703106E-03   .9420756E-03   .9802125E-03
   .9863331E-03   .9365468E-03   .8111060E-03   .6956393E-03   .6429843E-03
   .5874699E-03   .4470903E-03   .1958787E-03  -.8082700E-04  -.2708868E-03
  -.3475087E-03  -.3627372E-03  -.3855492E-03  -.4504065E-03  -.5402858E-03
  -.6051978E-03  -.6151126E-03  -.5872483E-03  -.5594521E-03  -.5436071E-03
  -.5104629E-03  -.4089150E-03  -.2262430E-03  -.4006343E-04   .2990388E-04
  -.4580201E-04  -.1910077E-03  -.2917285E-03  -.2562589E-03  -.1275256E-03
  -.3537280E-04  -.6354282E-04  -.1776439E-03  -.3089393E-03  -.4224388E-03
  -.4670194E-03  -.4334344E-03  -.3777036E-03  -.3576866E-03  -.3533136E-03
  -.3345827E-03  -.3221624E-03  -.3081792E-03  -.2803274E-03  -.2384692E-03
  -.2013515E-03  -.2152275E-03  -.2887135E-03  -.3711240E-03  -.3903349E-03
  -.3248086E-03  -.2139072E-03  -.1041476E-03  -.1622255E-04   .3673139E-04
   .8673307E-04   .1886048E-03   .2918329E-03   .3131958E-03   .2256293E-03
   .8553328E-04   .8377425E-05   .1880742E-05  -.3652822E-04  -.1652425E-03
  -.3094399E-03  -.3701583E-03  -.3341351E-03  -.2349421E-03  -.1816941E-03
  -.2903960E-03  -.5441522E-03  -.7718078E-03  -.8294162E-03  -.7630528E-03
  -.7222774E-03  -.7929205E-03  -.9403685E-03  -.1108326E-02  -.1253477E-02
  -.1331779E-02  -.1363315E-02  -.1383453E-02  -.1381908E-02  -.1393585E-02
  -.1439820E-02  -.1485441E-02  -.1533415E-02  -.1604529E-02  -.1683161E-02
  -.1724229E-02  -.1658315E-02  -.1459584E-02  -.1209386E-02  -.1000748E-02
  -.8346842E-03  -.6763547E-03  -.5633038E-03  -.5079363E-03  -.4236686E-03
  -.3014003E-03  -.2395300E-03  -.3101640E-03  -.5278510E-03  -.7986257E-03
  -.9709733E-03  -.1026559E-02  -.1013167E-02  -.9635847E-03  -.9121246E-03
  -.8420458E-03  -.7652499E-03  -.7363066E-03  -.7850322E-03  -.8615998E-03
  -.8353438E-03  -.6780695E-03  -.5004661E-03  -.4285782E-03  -.5372192E-03
  -.7626135E-03  -.9359753E-03  -.9810818E-03  -.9519008E-03  -.8928000E-03
  -.8315584E-03  -.8247578E-03  -.9126972E-03  -.1057363E-02  -.1161716E-02
  -.1181270E-02  -.1129791E-02  -.1014278E-02  -.8768334E-03  -.8003495E-03
  -.8605416E-03  -.1077314E-02  -.1348222E-02  -.1524155E-02  -.1569399E-02
  -.1531454E-02  -.1461211E-02  -.1419077E-02  -.1424497E-02  -.1460577E-02
  -.1540949E-02  -.1678365E-02  -.1837099E-02  -.1936584E-02  -.1922384E-02
  -.1819171E-02  -.1691316E-02  -.1593278E-02  -.1544796E-02  -.1546708E-02
  -.1585956E-02  -.1660473E-02  -.1746293E-02  -.1771176E-02  -.1670481E-02
  -.1477699E-02  -.1317997E-02  -.1241180E-02  -.1224444E-02  -.1237262E-02
  -.1216444E-02  -.1123287E-02  -.1012860E-02  -.9460492E-03  -.9075494E-03
  -.8681724E-03  -.8117938E-03  -.7366045E-03  -.6455158E-03  -.5060235E-03
  -.2950447E-03  -.5541094E-04   .1497759E-03   .2900955E-03   .3871373E-03
   .4610622E-03   .5182722E-03   .5634178E-03   .5625639E-03   .5215657E-03
   .5106140E-03   .6028660E-03   .8256380E-03   .1093451E-02   .1259274E-02
   .1262077E-02   .1149572E-02   .1018570E-02   .9461240E-03   .9437347E-03
   .9836972E-03   .1002574E-02   .9433130E-03   .8217041E-03   .6916798E-03
   .5981749E-03   .5477779E-03   .5013787E-03   .4232834E-03   .3279067E-03
   .2769904E-03   .2721816E-03   .2735216E-03   .2642454E-03   .2431229E-03
   .2420891E-03   .2280875E-03   .1576513E-03   .5463940E-04  -.2071181E-04
  -.2089141E-04  -.1888860E-04  -.1303104E-03  -.3458116E-03  -.5663660E-03
  -.6951930E-03  -.6884559E-03  -.6048523E-03  -.5191372E-03  -.4569857E-03
  -.4016728E-03  -.3518101E-03  -.3421026E-03  -.3708767E-03  -.3738706E-03
  -.2941900E-03  -.1661381E-03  -.2992920E-04   .8570816E-04   .1173517E-03
   .5951439E-04  -.2743063E-04  -.9253187E-04  -.1134263E-03  -.1111894E-03
  -.1145443E-03  -.1032290E-03  -.8364469E-04  -.1194195E-03  -.2170638E-03
  -.2981083E-03  -.3063577E-03  -.2570804E-03  -.2063191E-03  -.1790107E-03
  -.1522746E-03  -.1278774E-03  -.1188830E-03  -.1187262E-03  -.1307105E-03
  -.1426274E-03  -.1241273E-03  -.9003811E-04  -.5049677E-04   .1136161E-04
   .8003813E-04   .1403520E-03   .2080984E-03   .2942925E-03   .4020798E-03
   .5204198E-03   .6189873E-03   .6593451E-03   .6058456E-03   .4941165E-03
   .4204540E-03   .4359861E-03   .4915308E-03   .5327758E-03   .5546270E-03
   .5707435E-03   .5954355E-03   .6181054E-03   .6300923E-03   .6270031E-03
   .6159266E-03   .5978707E-03   .5583243E-03   .5183766E-03   .5234605E-03
   .5681821E-03   .6285871E-03   .6710335E-03   .6201949E-03   .4809894E-03
   .3310639E-03   .2239974E-03   .2021830E-03   .2619035E-03   .3395592E-03
   .3675445E-03   .3384879E-03   .2858835E-03   .2197568E-03   .1437511E-03
   .6471382E-04   .1526810E-04   .1416559E-04   .3949805E-04   .7248672E-04
   .9846069E-04   .1183951E-03   .1526432E-03   .2416635E-03   .4121346E-03
   .6066534E-03   .7326746E-03   .7529053E-03   .6885773E-03   .6067576E-03
   .5763450E-03   .6186139E-03   .7085884E-03   .7837061E-03   .7781214E-03
   .6768074E-03   .5455290E-03   .4686643E-03   .4782159E-03   .5742974E-03
   .7165289E-03   .8281658E-03   .8487989E-03   .7763666E-03   .6668372E-03
   .6054753E-03   .6622466E-03   .8044831E-03   .8933491E-03   .8248531E-03
   .6486632E-03   .5181766E-03   .5158246E-03   .5947174E-03   .6483866E-03
   .5702118E-03   .3623401E-03   .1386628E-03  -.2473313E-04  -.1319047E-03
  -.2000135E-03  -.2172649E-03  -.1753449E-03  -.1140886E-03  -.8261775E-04
  -.9528363E-04  -.1500757E-03  -.2386538E-03  -.3330036E-03  -.4052714E-03
  -.4418238E-03  -.4480552E-03  -.4403965E-03  -.4328030E-03  -.4342139E-03
  -.4289698E-03  -.4082700E-03  -.3815336E-03  -.3495984E-03  -.3191311E-03
  -.2950423E-03  -.2852945E-03  -.3118455E-03  -.3640630E-03  -.3954660E-03
  -.3652160E-03  -.2797287E-03  -.1907723E-03  -.1484033E-03  -.1596648E-03
  -.1981353E-03  -.2366137E-03  -.2360098E-03  -.1808531E-03  -.9874101E-04
  -.1679409E-04   .3319314E-04   .1971757E-04  -.3818785E-04  -.8367509E-04
  -.8117540E-04  -.3002391E-04   .5000632E-04   .1235224E-03   .1564354E-03
   .1463845E-03   .1102205E-03   .7483553E-04   .7624006E-04   .1252333E-03
   .2048754E-03   .2732708E-03   .2852319E-03   .2314078E-03   .1412336E-03
   .6866637E-04   .4547775E-04   .6381580E-04   .1006288E-03   .1213330E-03
   .1187143E-03   .1117000E-03   .1048602E-03   .9168661E-04   .7198695E-04
   .6080215E-04   .6687590E-04   .8531151E-04   .1003567E-03   .1069353E-03
   .1192014E-03   .1443479E-03   .1791652E-03   .2105608E-03   .2192856E-03
   .2119355E-03   .2115024E-03   .2270949E-03   .2601399E-03   .2902573E-03
   .2981042E-03   .2941681E-03   .2942639E-03   .3060861E-03   .3227526E-03
   .3256455E-03   .3125712E-03   .3012732E-03   .3032419E-03   .3202443E-03
   .3470761E-03   .3754756E-03   .3994415E-03   .4099689E-03   .4073349E-03
   .4015247E-03   .3942442E-03   .3895315E-03   .3964591E-03   .4136230E-03
   .4285878E-03   .4334028E-03   .4325471E-03   .4294376E-03   .4263848E-03
   .4268791E-03   .4269146E-03   .4261459E-03   .4247313E-03   .4169889E-03
   .4029132E-03   .3911502E-03   .3855130E-03   .3837184E-03   .3853327E-03
   .3853394E-03   .3802957E-03   .3704410E-03   .3581506E-03   .3446782E-03
   .3349483E-03   .3359128E-03   .3447600E-03   .3543071E-03   .3586271E-03
   .3528524E-03   .3367081E-03   .3146391E-03   .2928841E-03   .2768767E-03
   .2680997E-03   .2676889E-03   .2694225E-03   .2666008E-03   .2590726E-03
   .2459744E-03   .2310989E-03   .2192029E-03   .2101627E-03   .2029415E-03
   .1958351E-03   .1874846E-03   .1781105E-03   .1684244E-03   .1621414E-03
   .1611308E-03   .1616930E-03   .1586110E-03   .1501775E-03   .1405419E-03
   .1325375E-03   .1277243E-03   .1257798E-03   .1232232E-03   .1164363E-03
   .1005086E-03   .7797657E-04   .5703563E-04   .4188251E-04   .3303145E-04
   .2615312E-04   .1783339E-04   .1032377E-04   .5617487E-05   .3904795E-05
   .2696647E-05  -.1775849E-05  -.8315661E-05  -.1301061E-04  -.1444997E-04
  -.1419193E-04  -.1329680E-04  -.1244013E-04  -.1175433E-04  -.1185324E-04
  -.1485643E-04  -.1820387E-04  -.2077261E-04  -.2453095E-04  -.2862438E-04
  -.3232183E-04  -.3484012E-04  -.3519332E-04  -.3312434E-04  -.3019530E-04
  -.2926464E-04  -.3076212E-04  -.3322588E-04  -.3600675E-04  -.3852371E-04
  -.4058819E-04  -.4233044E-04  -.4221784E-04  -.4102430E-04  -.4086448E-04
  -.4133560E-04  -.4219446E-04  -.4261476E-04  -.4255643E-04  -.4273664E-04
  -.4334136E-04  -.4476653E-04  -.4626778E-04  -.4736852E-04  -.4843306E-04
  -.5002980E-04  -.5191990E-04  -.5278079E-04  -.5307392E-04  -.5289323E-04
  -.5184928E-04  -.5150800E-04  -.5239893E-04  -.5354398E-04  -.5437961E-04
  -.5514764E-04  -.5503716E-04  -.5409240E-04  -.5379859E-04  -.5433138E-04
  -.5488368E-04  -.5464352E-04  -.5409384E-04  -.5378426E-04  -.5366099E-04
  -.5390721E-04  -.5382927E-04  -.5313861E-04  -.5270887E-04  -.5252653E-04
  -.5263548E-04  -.5325040E-04  -.5376330E-04  -.5404197E-04  -.5411259E-04
  -.5391032E-04  -.5362683E-04  -.5366749E-04  -.5414974E-04  -.5455735E-04
  -.5472833E-04  -.5460609E-04  -.5416453E-04  -.5389555E-04  -.5386726E-04
  -.5384163E-04  -.5371541E-04  -.5329352E-04  -.5274366E-04  -.5237042E-04
  -.5210147E-04  -.5185164E-04  -.5150621E-04  -.5100680E-04  -.5053947E-04
  -.5018407E-04  -.4987146E-04  -.4950533E-04  -.4909376E-04  -.4867690E-04
  -.4826855E-04  -.4787368E-04  -.4747242E-04  -.4706467E-04  -.4666726E-04
  -.4623537E-04  -.4573227E-04  -.4520703E-04  -.4472846E-04  -.4423336E-04
  -.4368971E-04  -.4317829E-04  -.4267752E-04  -.4217350E-04  -.4167971E-04
  -.4121415E-04  -.4078877E-04  -.4036146E-04  -.3993110E-04  -.3948959E-04
  -.3901303E-04  -.3853309E-04  -.3807837E-04  -.3762894E-04  -.3717942E-04
  -.3673664E-04  -.3629256E-04  -.3585603E-04  -.3542187E-04  -.3499472E-04
  -.3457856E-04  -.3416633E-04  -.3376275E-04  -.3336531E-04  -.3297295E-04
  -.3258857E-04  -.3221285E-04  -.3184637E-04  -.3148751E-04  -.3113623E-04
  -.3079404E-04  -.3046043E-04  -.3013602E-04  -.2982117E-04  -.2951571E-04
