# Supplementary material for: Earthquake Response Analysis of Tall Reinforced Concrete Chimneys considering Eccentricity
Source: Hindawi journal article supplement (doi:10.1155/2020/1417969), 2020-03-11
Supplement: f1 [file 1417969.f1.zip › 1417969.f1/Four kinds of earthquake records/Soft rock/LOMAP GGB360.txt]

PEER STRONG MOTION DATABASE RECORD. PROCESSING BY PACIFIC ENGINEERING.
LOMA PRIETA 10/18/89 00:05, SF GOLDEN GATE BRIDGE, 360 (USGS STATION 1678)
ACCELERATION TIME HISTORY IN UNITS OF G. FILTER POINTS: HP=0.2 Hz LP=27.0 Hz
NPTS=  7615, DT= .00500 SEC
   .6532175E-03   .6645834E-03   .1529646E-03  -.4552222E-03  -.3603233E-03
  -.3566042E-03  -.3514343E-03  -.3447338E-03  -.3367038E-03  -.3277797E-03
  -.3186671E-03  -.3101686E-03  -.3031694E-03  -.2978076E-03  -.2930949E-03
  -.2880756E-03  -.2826451E-03  -.2775222E-03  -.2732356E-03  -.2697716E-03
  -.2669738E-03  -.2645341E-03  -.2627482E-03  -.2619031E-03  -.2615384E-03
  -.2607115E-03  -.2582015E-03  -.2534606E-03  -.2473340E-03  -.2424643E-03
  -.2413766E-03  -.2446033E-03  -.2512060E-03  -.2587649E-03  -.2649720E-03
  -.2695147E-03  -.2734468E-03  -.2783769E-03  -.2849842E-03  -.2922619E-03
  -.2995871E-03  -.3075722E-03  -.3171472E-03  -.3281548E-03  -.3383253E-03
  -.3453284E-03  -.3487119E-03  -.3493020E-03  -.3480346E-03  -.3445259E-03
  -.3373910E-03  -.3262620E-03  -.3112043E-03  -.2911563E-03  -.2636806E-03
  -.2258741E-03  -.1770408E-03  -.1192897E-03  -.5702634E-04   .3005235E-05
   .5683071E-04   .1066118E-03   .1563264E-03   .2074824E-03   .2571684E-03
   .3001129E-03   .3347887E-03   .3639076E-03   .3908862E-03   .4163350E-03
   .4354640E-03   .4377114E-03   .4091115E-03   .3424401E-03   .2395739E-03
   .1043692E-03  -.5694458E-04  -.2322754E-03  -.4065380E-03  -.5656560E-03
  -.6986567E-03  -.8034781E-03  -.8903655E-03  -.9719305E-03  -.1048344E-02
  -.1108085E-02  -.1137791E-02  -.1129921E-02  -.1087071E-02  -.1013228E-02
  -.9050419E-03  -.7624185E-03  -.5992976E-03  -.4319307E-03  -.2626111E-03
  -.8336577E-04   .1129174E-03   .3209827E-03   .5143416E-03   .6614204E-03
   .7490476E-03   .7822944E-03   .7718936E-03   .7257704E-03   .6483617E-03
   .5446770E-03   .4216977E-03   .2791133E-03   .1019348E-03  -.1237521E-03
  -.3916276E-03  -.6756667E-03  -.9434323E-03  -.1168458E-02  -.1330867E-02
  -.1418669E-02  -.1438210E-02  -.1416244E-02  -.1384797E-02  -.1357169E-02
  -.1327958E-02  -.1301443E-02  -.1294783E-02  -.1309306E-02  -.1321077E-02
  -.1302372E-02  -.1238406E-02  -.1127337E-02  -.9821681E-03  -.8213414E-03
  -.6567348E-03  -.4973598E-03  -.3453969E-03  -.2006341E-03  -.7533844E-04
   .1150587E-04   .5874072E-04   .8991781E-04   .1195390E-03   .1310873E-03
   .1070417E-03   .5714903E-04   .9070355E-05  -.1115528E-04  -.2665968E-06
   .2060916E-04   .3467519E-04   .4113350E-04   .4314864E-04   .5116811E-04
   .7948473E-04   .1244168E-03   .1820817E-03   .2716838E-03   .4070227E-03
   .5686094E-03   .7282350E-03   .8913199E-03   .1089790E-02   .1335495E-02
   .1604256E-02   .1862600E-02   .2093139E-02   .2298779E-02   .2482809E-02
   .2634088E-02   .2746962E-02   .2828522E-02   .2867744E-02   .2828415E-02
   .2687901E-02   .2461617E-02   .2188969E-02   .1903129E-02   .1610387E-02
   .1303121E-02   .9894290E-03   .7067525E-03   .5020814E-03   .4054344E-03
   .4204172E-03   .5061798E-03   .5799466E-03   .5622931E-03   .4176431E-03
   .1596904E-03  -.1598004E-03  -.4628952E-03  -.6764584E-03  -.7662631E-03
  -.7233727E-03  -.5406452E-03  -.2370336E-03   .1260206E-03   .4735356E-03
   .7500158E-03   .9391156E-03   .1086481E-02   .1270808E-02   .1520997E-02
   .1786880E-02   .1981899E-02   .2035860E-02   .1915637E-02   .1623673E-02
   .1206014E-02   .7489603E-03   .3312384E-03  -.4857680E-05  -.2552575E-03
  -.4709950E-03  -.7321624E-03  -.1075468E-02  -.1468285E-02  -.1859707E-02
  -.2225478E-02  -.2568080E-02  -.2908576E-02  -.3261881E-02  -.3604520E-02
  -.3876130E-02  -.4021661E-02  -.4020155E-02  -.3898671E-02  -.3736651E-02
  -.3590854E-02  -.3435547E-02  -.3198166E-02  -.2799348E-02  -.2192821E-02
  -.1441904E-02  -.7223945E-03  -.1927915E-03   .1272560E-03   .3480758E-03
   .5930097E-03   .9280524E-03   .1365730E-02   .1854770E-02   .2299594E-02
   .2612626E-02   .2751616E-02   .2696779E-02   .2410116E-02   .1870081E-02
   .1135394E-02   .3511583E-03  -.3593323E-03  -.9954089E-03  -.1629745E-02
  -.2289534E-02  -.2888954E-02  -.3253379E-02  -.3214848E-02  -.2730903E-02
  -.1921021E-02  -.9960593E-03  -.1746251E-03   .4183980E-03   .7984693E-03
   .1055771E-02   .1245501E-02   .1320469E-02   .1208064E-02   .9250630E-03
   .6029505E-03   .4392832E-03   .5909017E-03   .1090718E-02   .1840921E-02
   .2652430E-02   .3361110E-02   .3937812E-02   .4470129E-02   .5052190E-02
   .5664787E-02   .6155991E-02   .6365788E-02   .6258359E-02   .5908601E-02
   .5384728E-02   .4662384E-02   .3647614E-02   .2291114E-02   .6792309E-03
  -.9918697E-03  -.2501404E-02  -.3679963E-02  -.4462019E-02  -.4878453E-02
  -.5015130E-02  -.4962804E-02  -.4772964E-02  -.4461285E-02  -.4019941E-02
  -.3424191E-02  -.2685366E-02  -.1887607E-02  -.1106205E-02  -.3205964E-03
   .4894531E-03   .1253522E-02   .1880099E-02   .2333139E-02   .2650372E-02
   .2904440E-02   .3130724E-02   .3274289E-02   .3219059E-02   .2874310E-02
   .2246039E-02   .1451503E-02   .6610672E-03   .1226237E-04  -.4692291E-03
  -.8787229E-03  -.1318752E-02  -.1811139E-02  -.2286244E-02  -.2585760E-02
  -.2570719E-02  -.2232775E-02  -.1696392E-02  -.1123354E-02  -.5675190E-03
   .5036318E-04   .8537144E-03   .1934967E-02   .3343936E-02   .5048924E-02
   .6875050E-02   .8560907E-02   .9868917E-02   .1064305E-01   .1083678E-01
   .1047956E-01   .9602515E-02   .8258695E-02   .6604288E-02   .4883432E-02
   .3261307E-02   .1649617E-02  -.2378309E-03  -.2606429E-02  -.5367522E-02
  -.8188476E-02  -.1069987E-01  -.1265477E-01  -.1398549E-01  -.1478108E-01
  -.1521379E-01  -.1544490E-01  -.1555593E-01  -.1552094E-01  -.1522737E-01
  -.1455555E-01  -.1343311E-01  -.1183945E-01  -.9830622E-02  -.7583196E-02
  -.5334955E-02  -.3229146E-02  -.1271157E-02   .5708836E-03   .2306144E-02
   .3944861E-02   .5501101E-02   .7000193E-02   .8473183E-02   .9841716E-02
   .1085996E-01   .1123932E-01   .1086531E-01   .9892228E-02   .8623628E-02
   .7344774E-02   .6224189E-02   .5335924E-02   .4729183E-02   .4420886E-02
   .4324678E-02   .4226987E-02   .3878242E-02   .3123758E-02   .1987473E-02
   .6804749E-03  -.5246866E-03  -.1489709E-02  -.2246316E-02  -.2881604E-02
  -.3469283E-02  -.4006939E-02  -.4394958E-02  -.4550277E-02  -.4486908E-02
  -.4247713E-02  -.3808751E-02  -.3120883E-02  -.2201119E-02  -.1158170E-02
  -.1589203E-03   .6470735E-03   .1178040E-02   .1401374E-02   .1302056E-02
   .8861857E-03   .1783271E-03  -.7635800E-03  -.1814790E-02  -.2804317E-02
  -.3590295E-02  -.4085341E-02  -.4236440E-02  -.4050838E-02  -.3594261E-02
  -.2928793E-02  -.2125196E-02  -.1300299E-02  -.5330446E-03   .1764944E-03
   .8054385E-03   .1226045E-02   .1243364E-02   .7366108E-03  -.2260880E-03
  -.1422025E-02  -.2552184E-02  -.3339258E-02  -.3635399E-02  -.3428469E-02
  -.2817179E-02  -.1952819E-02  -.9544456E-03   .1245640E-03   .1279968E-02
   .2533326E-02   .3904179E-02   .5320649E-02   .6577336E-02   .7428029E-02
   .7707466E-02   .7415415E-02   .6694885E-02   .5719104E-02   .4604473E-02
   .3426838E-02   .2314854E-02   .1413304E-02   .7412067E-03   .1615136E-03
  -.5713572E-03  -.1693371E-02  -.3233481E-02  -.4956245E-02  -.6506223E-02
  -.7597942E-02  -.8143350E-02  -.8254323E-02  -.8112798E-02  -.7822583E-02
  -.7350841E-02  -.6583350E-02  -.5387589E-02  -.3638134E-02  -.1332164E-02
   .1305778E-02   .3907825E-02   .6157126E-02   .7884208E-02   .9059191E-02
   .9790126E-02   .1024071E-01   .1052176E-01   .1066675E-01   .1065912E-01
   .1046868E-01   .1005963E-01   .9357733E-02   .8222532E-02   .6612966E-02
   .4747946E-02   .2976654E-02   .1548548E-02   .5016849E-03  -.3112880E-03
  -.1120963E-02  -.2084866E-02  -.3217972E-02  -.4410485E-02  -.5480640E-02
  -.6314028E-02  -.6929787E-02  -.7396302E-02  -.7714907E-02  -.7805708E-02
  -.7599118E-02  -.7150008E-02  -.6624930E-02  -.6181493E-02  -.5929821E-02
  -.5926097E-02  -.6140404E-02  -.6425190E-02  -.6553579E-02  -.6383657E-02
  -.5959015E-02  -.5436437E-02  -.4982931E-02  -.4732215E-02  -.4724972E-02
  -.4871974E-02  -.5139233E-02  -.5653577E-02  -.6534743E-02  -.7765565E-02
  -.9121354E-02  -.1022851E-01  -.1079029E-01  -.1076690E-01  -.1035706E-01
  -.9817716E-02  -.9300297E-02  -.8773813E-02  -.8054754E-02  -.6898970E-02
  -.5107655E-02  -.2661687E-02   .1891678E-03   .3015316E-02   .5410562E-02
   .7181188E-02   .8348884E-02   .9008907E-02   .9292781E-02   .9343327E-02
   .9260357E-02   .9103910E-02   .8887516E-02   .8553437E-02   .8041168E-02
   .7378940E-02   .6655091E-02   .5946105E-02   .5287383E-02   .4644487E-02
   .3936175E-02   .3140993E-02   .2320712E-02   .1566713E-02   .1012942E-02
   .7552926E-03   .6825796E-03   .5527703E-03   .2118979E-03  -.3744458E-03
  -.1166166E-02  -.2036654E-02  -.2845662E-02  -.3547547E-02  -.4156150E-02
  -.4648843E-02  -.4949822E-02  -.4957551E-02  -.4588648E-02  -.3816824E-02
  -.2706808E-02  -.1388263E-02  -.4938730E-04   .1083223E-02   .1895139E-02
   .2396693E-02   .2604526E-02   .2443961E-02   .1801441E-02   .7090125E-03
  -.6303701E-03  -.1927328E-02  -.2937467E-02  -.3602846E-02  -.4024887E-02
  -.4356771E-02  -.4650743E-02  -.4825879E-02  -.4780455E-02  -.4496525E-02
  -.4166152E-02  -.4059630E-02  -.4258552E-02  -.4642895E-02  -.5064219E-02
  -.5427544E-02  -.5662242E-02  -.5783445E-02  -.5882151E-02  -.5975924E-02
  -.5969594E-02  -.5686693E-02  -.4955693E-02  -.3791356E-02  -.2412911E-02
  -.1081285E-02  -.6337550E-05   .6601560E-03   .8385620E-03   .5764221E-03
  -.1062062E-04  -.8009531E-03  -.1601784E-02  -.2189108E-02  -.2417222E-02
  -.2328477E-02  -.2096289E-02  -.1828995E-02  -.1630095E-02  -.1655731E-02
  -.1964672E-02  -.2486305E-02  -.3074278E-02  -.3581236E-02  -.3926308E-02
  -.4146862E-02  -.4366884E-02  -.4660957E-02  -.5012579E-02  -.5331199E-02
  -.5505237E-02  -.5434504E-02  -.5080143E-02  -.4476177E-02  -.3646829E-02
  -.2642299E-02  -.1512751E-02  -.2940973E-03   .1012795E-02   .2484394E-02
   .4094379E-02   .5703851E-02   .7182718E-02   .8466185E-02   .9567166E-02
   .1045902E-01   .1103376E-01   .1125313E-01   .1117434E-01   .1090173E-01
   .1058658E-01   .1024602E-01   .9711757E-02   .8804080E-02   .7500096E-02
   .5996951E-02   .4556278E-02   .3313605E-02   .2231682E-02   .1190100E-02
   .8876914E-04  -.1010959E-02  -.1887114E-02  -.2436368E-02  -.2722974E-02
  -.2905897E-02  -.3091649E-02  -.3313412E-02  -.3559060E-02  -.3606975E-02
  -.3286834E-02  -.2703114E-02  -.2048255E-02  -.1493635E-02  -.1094059E-02
  -.7160316E-03  -.2762938E-03   .2754523E-03   .9554021E-03   .1731692E-02
   .2646081E-02   .3573934E-02   .4348805E-02   .4875924E-02   .5004545E-02
   .4723927E-02   .4216027E-02   .3679843E-02   .3279871E-02   .3119973E-02
   .3171884E-02   .3328531E-02   .3430349E-02   .3288960E-02   .2933049E-02
   .2559492E-02   .2409939E-02   .2685829E-02   .3322575E-02   .4075462E-02
   .4598103E-02   .4572379E-02   .3929828E-02   .2892446E-02   .1746364E-02
   .6245077E-03  -.3391379E-03  -.1066457E-02  -.1578493E-02  -.1860232E-02
  -.1926495E-02  -.1836089E-02  -.1626997E-02  -.1378129E-02  -.1157134E-02
  -.8877887E-03  -.5011653E-03   .7262240E-04   .9271581E-03   .2084734E-02
   .3369518E-02   .4522649E-02   .5397729E-02   .5932155E-02   .6146377E-02
   .6085364E-02   .5829164E-02   .5377377E-02   .4834088E-02   .4415693E-02
   .4128029E-02   .3794663E-02   .3195523E-02   .2225149E-02   .9943863E-03
  -.1944180E-03  -.1111779E-02  -.1668622E-02  -.1877434E-02  -.1890583E-02
  -.1843750E-02  -.1769542E-02  -.1661579E-02  -.1448586E-02  -.1018648E-02
  -.2522779E-03   .9109016E-03   .2322199E-02   .3750054E-02   .5083493E-02
   .6300378E-02   .7430039E-02   .8585473E-02   .9809497E-02   .1103122E-01
   .1215154E-01   .1311021E-01   .1380751E-01   .1404391E-01   .1375451E-01
   .1308213E-01   .1217549E-01   .1112810E-01   .1005620E-01   .9008974E-02
   .7943456E-02   .6859877E-02   .5686901E-02   .4294263E-02   .2748850E-02
   .1157204E-02  -.2623928E-03  -.1281463E-02  -.1945779E-02  -.2342482E-02
  -.2628295E-02  -.2828339E-02  -.2964046E-02  -.3114802E-02  -.3147293E-02
  -.3020728E-02  -.2717288E-02  -.2292850E-02  -.1805491E-02  -.1178152E-02
  -.3519646E-03   .7717663E-03   .2112826E-02   .3366123E-02   .4365470E-02
   .4905484E-02   .4776031E-02   .4142605E-02   .3287403E-02   .2495000E-02
   .1889866E-02   .1326548E-02   .5846101E-03  -.4111644E-03  -.1557301E-02
  -.2615501E-02  -.3280726E-02  -.3431684E-02  -.3195664E-02  -.2872980E-02
  -.2659253E-02  -.2670245E-02  -.2888205E-02  -.3063076E-02  -.2881814E-02
  -.2226953E-02  -.1351896E-02  -.5252508E-03   .1111289E-03   .6109953E-03
   .1160768E-02   .1799716E-02   .2514650E-02   .3226477E-02   .3760871E-02
   .4092587E-02   .4245919E-02   .4229702E-02   .4192665E-02   .4286608E-02
   .4570954E-02   .4929219E-02   .5151755E-02   .5128480E-02   .4943236E-02
   .4736922E-02   .4582045E-02   .4404720E-02   .3981101E-02   .3293832E-02
   .2381487E-02   .1333384E-02   .3096199E-03  -.5949735E-03  -.1312804E-02
  -.1940678E-02  -.2568412E-02  -.3160711E-02  -.3648053E-02  -.3955073E-02
  -.4005564E-02  -.3876195E-02  -.3706606E-02  -.3519886E-02  -.3296477E-02
  -.2991527E-02  -.2494753E-02  -.1737844E-02  -.7862128E-03   .1679614E-03
   .9852738E-03   .1697000E-02   .2346167E-02   .3011721E-02   .3664211E-02
   .4178855E-02   .4445184E-02   .4335293E-02   .3797782E-02   .3055032E-02
   .2463409E-02   .2205610E-02   .2317279E-02   .2513443E-02   .2456700E-02
   .2186812E-02   .1883465E-02   .1695330E-02   .1666471E-02   .1658971E-02
   .1463269E-02   .9771681E-03   .3566130E-03  -.1332795E-03  -.3463152E-03
  -.2624598E-03   .2113095E-04   .2892890E-03   .3824974E-03   .1861079E-03
  -.2970988E-03  -.8084632E-03  -.1108129E-02  -.1117508E-02  -.9389084E-03
  -.9256341E-03  -.1289838E-02  -.1887138E-02  -.2521555E-02  -.2949428E-02
  -.3025919E-02  -.2954421E-02  -.3061880E-02  -.3491698E-02  -.4137769E-02
  -.4728310E-02  -.5054193E-02  -.5068112E-02  -.4909992E-02  -.4851112E-02
  -.5035490E-02  -.5400228E-02  -.5717454E-02  -.5751048E-02  -.5400788E-02
  -.4727823E-02  -.3835109E-02  -.2834637E-02  -.1865849E-02  -.1057738E-02
  -.5440408E-03  -.2439664E-03   .3532944E-04   .3192764E-03   .5923618E-03
   .8238475E-03   .9690626E-03   .1079852E-02   .1244859E-02   .1546527E-02
   .1988928E-02   .2524788E-02   .3142894E-02   .3717420E-02   .4111147E-02
   .4286153E-02   .4248769E-02   .4057080E-02   .3747205E-02   .3431822E-02
   .3245856E-02   .3215886E-02   .3247953E-02   .3128394E-02   .2643411E-02
   .1707645E-02   .5006278E-03  -.6300330E-03  -.1381374E-02  -.1675872E-02
  -.1701346E-02  -.1711430E-02  -.1838084E-02  -.2050923E-02  -.2236516E-02
  -.2304184E-02  -.2243242E-02  -.2130941E-02  -.1990859E-02  -.1801776E-02
  -.1631440E-02  -.1549689E-02  -.1555146E-02  -.1554896E-02  -.1516204E-02
  -.1430121E-02  -.1219067E-02  -.1030523E-02  -.1030513E-02  -.1174068E-02
  -.1440060E-02  -.1721106E-02  -.1876156E-02  -.1920788E-02  -.1827214E-02
  -.1656899E-02  -.1585173E-02  -.1628415E-02  -.1801599E-02  -.2090053E-02
  -.2348203E-02  -.2401471E-02  -.2069305E-02  -.1316376E-02  -.3396870E-03
   .5660823E-03   .1263505E-02   .1772823E-02   .2156509E-02   .2481945E-02
   .2711698E-02   .2701174E-02   .2352721E-02   .1753463E-02   .1000073E-02
   .1455065E-03  -.7624689E-03  -.1728516E-02  -.2712568E-02  -.3482216E-02
  -.3819229E-02  -.3721583E-02  -.3271029E-02  -.2690980E-02  -.2221547E-02
  -.1943068E-02  -.1808195E-02  -.1690470E-02  -.1505589E-02  -.1234710E-02
  -.9978299E-03  -.9752532E-03  -.1206889E-02  -.1624698E-02  -.2027909E-02
  -.2199206E-02  -.2128587E-02  -.1965867E-02  -.1843821E-02  -.1780906E-02
  -.1698454E-02  -.1531747E-02  -.1321448E-02  -.1239590E-02  -.1584411E-02
  -.2427138E-02  -.3539512E-02  -.4597668E-02  -.5316299E-02  -.5643877E-02
  -.5614273E-02  -.5376004E-02  -.5124165E-02  -.4872613E-02  -.4538408E-02
  -.4064037E-02  -.3481125E-02  -.2931238E-02  -.2602987E-02  -.2556110E-02
  -.2595517E-02  -.2478258E-02  -.2169352E-02  -.1900466E-02  -.2009117E-02
  -.2551440E-02  -.3253239E-02  -.3800163E-02  -.4073958E-02  -.4107302E-02
  -.4042200E-02  -.4019292E-02  -.4029771E-02  -.4031010E-02  -.3927319E-02
  -.3619645E-02  -.3261287E-02  -.3176759E-02  -.3508238E-02  -.4051234E-02
  -.4477882E-02  -.4589266E-02  -.4378895E-02  -.3967866E-02  -.3363634E-02
  -.2535580E-02  -.1554191E-02  -.5201049E-03   .4021884E-03   .1085324E-02
   .1445037E-02   .1462606E-02   .1260350E-02   .9322989E-03   .5540608E-03
   .2103902E-03  -.6466964E-04  -.2307044E-03  -.3123134E-03  -.3312960E-03
  -.2534504E-03  -.1310146E-03  -.1906227E-04   .5823850E-06  -.1029290E-03
  -.1637794E-03  -.1641752E-04   .3814171E-03   .9234868E-03   .1402536E-02
   .1662388E-02   .1623360E-02   .1400269E-02   .1196946E-02   .1159379E-02
   .1410574E-02   .1836159E-02   .2180159E-02   .2291315E-02   .2151049E-02
   .1868889E-02   .1588762E-02   .1341461E-02   .1091557E-02   .7337799E-03
   .1336022E-03  -.6085380E-03  -.1212896E-02  -.1483071E-02  -.1492894E-02
  -.1483104E-02  -.1551264E-02  -.1593241E-02  -.1485524E-02  -.1170759E-02
  -.6524335E-03   .1928456E-04   .7944402E-03   .1466268E-02   .1807662E-02
   .1825168E-02   .1629663E-02   .1395577E-02   .1269060E-02   .1358883E-02
   .1682357E-02   .2183904E-02   .2846294E-02   .3560537E-02   .4216050E-02
   .4764457E-02   .5185020E-02   .5501532E-02   .5767481E-02   .6044013E-02
   .6346987E-02   .6682361E-02   .7001189E-02   .7216024E-02   .7225084E-02
   .6868771E-02   .6132161E-02   .5200903E-02   .4291413E-02   .3488041E-02
   .2821139E-02   .2287092E-02   .1802284E-02   .1298766E-02   .6732064E-03
  -.9971377E-04  -.8614999E-03  -.1444266E-02  -.1782144E-02  -.1925456E-02
  -.1963843E-02  -.1976486E-02  -.2080984E-02  -.2353136E-02  -.2767115E-02
  -.3235499E-02  -.3628173E-02  -.3778225E-02  -.3578048E-02  -.3074968E-02
  -.2395331E-02  -.1693080E-02  -.1042322E-02  -.3828443E-03   .3516378E-03
   .1178641E-02   .2064503E-02   .2978095E-02   .3894284E-02   .4788717E-02
   .5603345E-02   .6222491E-02   .6508569E-02   .6318590E-02   .5617666E-02
   .4498173E-02   .3156869E-02   .1870075E-02   .8553133E-03   .1119825E-03
  -.5353438E-03  -.1238975E-02  -.2052060E-02  -.2905615E-02  -.3682342E-02
  -.4258582E-02  -.4521808E-02  -.4375193E-02  -.3754407E-02  -.2784921E-02
  -.1693885E-02  -.6176766E-03   .3910547E-03   .1312080E-02   .2106251E-02
   .2755633E-02   .3303597E-02   .3774699E-02   .4126363E-02   .4358639E-02
   .4522940E-02   .4584258E-02   .4403279E-02   .3884359E-02   .3130245E-02
   .2278216E-02   .1428285E-02   .6412617E-03  -.1091514E-03  -.8380407E-03
  -.1546019E-02  -.2170346E-02  -.2610013E-02  -.2895326E-02  -.3146549E-02
  -.3407917E-02  -.3652102E-02  -.3802752E-02  -.3806545E-02  -.3662604E-02
  -.3347591E-02  -.2885735E-02  -.2315822E-02  -.1654963E-02  -.9344977E-03
  -.2112917E-03   .4021167E-03   .8782365E-03   .1244787E-02   .1473288E-02
   .1497794E-02   .1205700E-02   .5963156E-03  -.1201667E-03  -.7033507E-03
  -.1016783E-02  -.1044547E-02  -.9193528E-03  -.7951764E-03  -.7430214E-03
  -.7615082E-03  -.7601710E-03  -.5870182E-03  -.2132253E-03   .2176098E-03
   .5431413E-03   .6138833E-03   .4204374E-03   .1198469E-03  -.1276215E-03
  -.2402188E-03  -.2536122E-03  -.2211694E-03  -.1599390E-03  -.5195096E-04
   .1710470E-03   .5219773E-03   .8954234E-03   .1160017E-02   .1275784E-02
   .1290336E-02   .1263862E-02   .1236640E-02   .1243331E-02   .1271548E-02
   .1325408E-02   .1424538E-02   .1540591E-02   .1694418E-02   .1924829E-02
   .2293923E-02   .2861506E-02   .3546585E-02   .4174734E-02   .4601674E-02
   .4758922E-02   .4650207E-02   .4378053E-02   .4059936E-02   .3713095E-02
   .3301170E-02   .2783768E-02   .2213526E-02   .1699535E-02   .1296041E-02
   .9560830E-03   .5095033E-03  -.1713135E-03  -.1011153E-02  -.1760509E-02
  -.2183116E-02  -.2214888E-02  -.1987371E-02  -.1713017E-02  -.1547009E-02
  -.1500373E-02  -.1519716E-02  -.1602262E-02  -.1673742E-02  -.1621506E-02
  -.1410596E-02  -.1040474E-02  -.5855599E-03  -.1668628E-03   .1329216E-03
   .2912954E-03   .3592447E-03   .4505396E-03   .6326763E-03   .8544920E-03
   .1077811E-02   .1298482E-02   .1474340E-02   .1524087E-02   .1419410E-02
   .1244822E-02   .1103251E-02   .1032558E-02   .9663373E-03   .7520043E-03
   .2749482E-03  -.3959861E-03  -.1029927E-02  -.1414567E-02  -.1455376E-02
  -.1180144E-02  -.6749568E-03  -.3300890E-04   .6863400E-03   .1475779E-02
   .2307909E-02   .3158175E-02   .3978888E-02   .4676657E-02   .5159223E-02
   .5380550E-02   .5332533E-02   .5112431E-02   .4920952E-02   .4869696E-02
   .4909084E-02   .4897308E-02   .4809418E-02   .4746547E-02   .4831702E-02
   .5145652E-02   .5649911E-02   .6242336E-02   .6769637E-02   .7056546E-02
   .6981635E-02   .6523946E-02   .5771684E-02   .4872633E-02   .3938694E-02
   .3061346E-02   .2311568E-02   .1681058E-02   .1243669E-02   .1071967E-02
   .1157002E-02   .1550722E-02   .2234496E-02   .3070627E-02   .3916086E-02
   .4603296E-02   .5026253E-02   .5212016E-02   .5238573E-02   .5245084E-02
   .5281745E-02   .5275870E-02   .5183153E-02   .5018227E-02   .4854512E-02
   .4673469E-02   .4410852E-02   .4043213E-02   .3599704E-02   .3210088E-02
   .2989378E-02   .2931512E-02   .2920062E-02   .2807532E-02   .2487215E-02
   .1989040E-02   .1428207E-02   .8872793E-03   .4194829E-03  -.3772924E-05
  -.4069620E-03  -.7227531E-03  -.9846510E-03  -.1266531E-02  -.1625372E-02
  -.2082136E-02  -.2587305E-02  -.3139478E-02  -.3746491E-02  -.4389673E-02
  -.5013591E-02  -.5501118E-02  -.5756617E-02  -.5823893E-02  -.5774781E-02
  -.5670052E-02  -.5586057E-02  -.5531821E-02  -.5459623E-02  -.5355852E-02
  -.5287926E-02  -.5299822E-02  -.5349799E-02  -.5395291E-02  -.5391985E-02
  -.5357641E-02  -.5378092E-02  -.5569828E-02  -.5955318E-02  -.6388591E-02
  -.6791500E-02  -.7069204E-02  -.7124436E-02  -.7023149E-02  -.6879300E-02
  -.6690384E-02  -.6452163E-02  -.6217967E-02  -.5958635E-02  -.5653979E-02
  -.5327878E-02  -.4992963E-02  -.4733591E-02  -.4613397E-02  -.4589881E-02
  -.4636266E-02  -.4642656E-02  -.4492650E-02  -.4182049E-02  -.3724409E-02
  -.3195868E-02  -.2658358E-02  -.2037208E-02  -.1319926E-02  -.5816702E-03
   .1682615E-03   .8597580E-03   .1520741E-02   .2175682E-02   .2702161E-02
   .3108127E-02   .3429157E-02   .3690553E-02   .3833229E-02   .3814587E-02
   .3724593E-02   .3640944E-02   .3594393E-02   .3638334E-02   .3785830E-02
   .3890464E-02   .3837406E-02   .3591794E-02   .3141596E-02   .2561848E-02
   .2002211E-02   .1401099E-02   .7738255E-03   .1678485E-03  -.5429654E-03
  -.1329802E-02  -.2188168E-02  -.3069422E-02  -.3878198E-02  -.4529330E-02
  -.4977367E-02  -.5219364E-02  -.5186091E-02  -.4789201E-02  -.3944822E-02
  -.2742307E-02  -.1333917E-02   .1407028E-03   .1516280E-02   .2657871E-02
   .3488170E-02   .4031077E-02   .4327583E-02   .4451327E-02   .4359201E-02
   .3868056E-02   .2953593E-02   .1719709E-02   .2566591E-03  -.1218002E-02
  -.2486558E-02  -.3528714E-02  -.4327222E-02  -.4955849E-02  -.5476871E-02
  -.5809461E-02  -.5967742E-02  -.6033768E-02  -.6184089E-02  -.6561746E-02
  -.7209064E-02  -.7977407E-02  -.8580580E-02  -.8897883E-02  -.8811573E-02
  -.8390854E-02  -.7786173E-02  -.7069322E-02  -.6461397E-02  -.6096240E-02
  -.5921460E-02  -.5840689E-02  -.5660644E-02  -.5332955E-02  -.4961350E-02
  -.4529019E-02  -.4236604E-02  -.4262296E-02  -.4492341E-02  -.4873742E-02
  -.5285423E-02  -.5537340E-02  -.5506224E-02  -.5064205E-02  -.4348873E-02
  -.3648898E-02  -.3080063E-02  -.2747749E-02  -.2600208E-02  -.2469781E-02
  -.2290278E-02  -.2006843E-02  -.1754625E-02  -.1691340E-02  -.1735764E-02
  -.1725979E-02  -.1505937E-02  -.9940754E-03  -.2785063E-03   .5092638E-03
   .1112699E-02   .1270333E-02   .1099664E-02   .7704097E-03   .3621406E-03
   .1584540E-04  -.1661654E-03  -.2413076E-03  -.2298346E-03  -.1130762E-03
  -.6821619E-05   .7958660E-04   .1348098E-03   .1054026E-03  -.1935774E-04
  -.3067838E-03  -.6731996E-03  -.1066886E-02  -.1480592E-02  -.1775313E-02
  -.1846944E-02  -.1721780E-02  -.1630138E-02  -.1643478E-02  -.1817115E-02
  -.2159157E-02  -.2396630E-02  -.2431263E-02  -.2327840E-02  -.2137701E-02
  -.2072555E-02  -.2234889E-02  -.2526466E-02  -.2915527E-02  -.3346750E-02
  -.3612140E-02  -.3559316E-02  -.3248836E-02  -.2692459E-02  -.2066876E-02
  -.1391544E-02  -.6126499E-03   .1288867E-03   .9394749E-03   .1778209E-02
   .2547256E-02   .3293817E-02   .3983622E-02   .4588112E-02   .5118298E-02
   .5638998E-02   .6230186E-02   .6786363E-02   .7227034E-02   .7629593E-02
   .7861894E-02   .7812170E-02   .7602753E-02   .7279275E-02   .6762686E-02
   .6016967E-02   .5104566E-02   .4049416E-02   .2913995E-02   .1888921E-02
   .1074072E-02   .5077282E-03   .5243841E-04  -.3860080E-03  -.8700235E-03
  -.1548163E-02  -.2270895E-02  -.2977626E-02  -.3688711E-02  -.4313012E-02
  -.4776032E-02  -.5000911E-02  -.5019644E-02  -.4948963E-02  -.4787211E-02
  -.4499890E-02  -.4025232E-02  -.3207212E-02  -.2151150E-02  -.1017759E-02
   .1183416E-04   .7000304E-03   .1081631E-02   .1186369E-02   .1071127E-02
   .8497302E-03   .5052567E-03   .1183568E-03  -.2510610E-03  -.6454561E-03
  -.9594806E-03  -.1201877E-02  -.1409101E-02  -.1570082E-02  -.1887408E-02
  -.2416521E-02  -.3156403E-02  -.4187179E-02  -.5342412E-02  -.6485189E-02
  -.7541691E-02  -.8395018E-02  -.9111235E-02  -.9722242E-02  -.1017121E-01
  -.1045043E-01  -.1054752E-01  -.1048028E-01  -.1033929E-01  -.1013084E-01
  -.9897533E-02  -.9665810E-02  -.9357110E-02  -.9129067E-02  -.9151013E-02
  -.9539731E-02  -.1019519E-01  -.1083922E-01  -.1144140E-01  -.1191092E-01
  -.1224988E-01  -.1256052E-01  -.1271243E-01  -.1270943E-01  -.1260133E-01
  -.1227885E-01  -.1184984E-01  -.1147387E-01  -.1119987E-01  -.1099463E-01
  -.1072189E-01  -.1027823E-01  -.9604941E-02  -.8793176E-02  -.7936091E-02
  -.7051816E-02  -.6223662E-02  -.5342218E-02  -.4284942E-02  -.3062352E-02
  -.1704156E-02  -.2873559E-03   .1334438E-02   .3174372E-02   .5075527E-02
   .6927460E-02   .8577494E-02   .9897389E-02   .1076187E-01   .1124044E-01
   .1152771E-01   .1181908E-01   .1231031E-01   .1299449E-01   .1378624E-01
   .1477304E-01   .1591086E-01   .1711070E-01   .1844369E-01   .1988800E-01
   .2139974E-01   .2280631E-01   .2388407E-01   .2468323E-01   .2524716E-01
   .2558861E-01   .2592326E-01   .2635557E-01   .2672689E-01   .2686635E-01
   .2677622E-01   .2657443E-01   .2633182E-01   .2609538E-01   .2579518E-01
   .2526705E-01   .2442197E-01   .2326809E-01   .2185762E-01   .2029442E-01
   .1864046E-01   .1687123E-01   .1507713E-01   .1322858E-01   .1130754E-01
   .9519206E-02   .7803223E-02   .6048071E-02   .4360650E-02   .2692954E-02
   .9584647E-03  -.7257191E-03  -.2266747E-02  -.3685741E-02  -.4930553E-02
  -.5910037E-02  -.6594612E-02  -.6967193E-02  -.6965161E-02  -.6609985E-02
  -.5980115E-02  -.5098877E-02  -.3996804E-02  -.2605670E-02  -.8251749E-03
   .1323475E-02   .3782103E-02   .6516983E-02   .9259762E-02   .1174687E-01
   .1405116E-01   .1615248E-01   .1798017E-01   .1974388E-01   .2156686E-01
   .2330799E-01   .2489135E-01   .2632161E-01   .2760755E-01   .2876485E-01
   .2982744E-01   .3079056E-01   .3153178E-01   .3196107E-01   .3204686E-01
   .3188079E-01   .3154272E-01   .3099490E-01   .3029311E-01   .2937982E-01
   .2831089E-01   .2722631E-01   .2607046E-01   .2489696E-01   .2358089E-01
   .2197371E-01   .2023737E-01   .1851371E-01   .1689984E-01   .1535288E-01
   .1381678E-01   .1228775E-01   .1069255E-01   .9102746E-02   .7566750E-02
   .6080657E-02   .4673326E-02   .3296123E-02   .1922824E-02   .6062422E-03
  -.6395190E-03  -.1861228E-02  -.3098280E-02  -.4416839E-02  -.5701129E-02
  -.6907065E-02  -.8049317E-02  -.9052261E-02  -.1001562E-01  -.1092584E-01
  -.1171708E-01  -.1239365E-01  -.1302777E-01  -.1357747E-01  -.1404021E-01
  -.1456009E-01  -.1514847E-01  -.1589771E-01  -.1678148E-01  -.1776168E-01
  -.1891856E-01  -.2019951E-01  -.2147149E-01  -.2274102E-01  -.2408424E-01
  -.2549804E-01  -.2720141E-01  -.2939821E-01  -.3196520E-01  -.3489030E-01
  -.3821401E-01  -.4151004E-01  -.4456650E-01  -.4749038E-01  -.5010039E-01
  -.5242731E-01  -.5471406E-01  -.5694366E-01  -.5896383E-01  -.6080157E-01
  -.6255784E-01  -.6426100E-01  -.6578517E-01  -.6711855E-01  -.6853147E-01
  -.6982860E-01  -.7081274E-01  -.7155794E-01  -.7187233E-01  -.7182405E-01
  -.7139348E-01  -.7047426E-01  -.6909004E-01  -.6696613E-01  -.6395548E-01
  -.6008903E-01  -.5572339E-01  -.5117650E-01  -.4653747E-01  -.4188453E-01
  -.3702617E-01  -.3197623E-01  -.2666140E-01  -.2104009E-01  -.1538585E-01
  -.9824320E-02  -.4361168E-02   .9144234E-03   .5877632E-02   .1068588E-01
   .1523292E-01   .1935264E-01   .2314807E-01   .2666806E-01   .2988765E-01
   .3255948E-01   .3475001E-01   .3664163E-01   .3822402E-01   .3948503E-01
   .4047873E-01   .4115220E-01   .4133682E-01   .4110903E-01   .4044960E-01
   .3935558E-01   .3807346E-01   .3680069E-01   .3545749E-01   .3396336E-01
   .3233891E-01   .3066454E-01   .2889909E-01   .2713781E-01   .2550861E-01
   .2384750E-01   .2224942E-01   .2069051E-01   .1905166E-01   .1753636E-01
   .1632066E-01   .1536637E-01   .1472195E-01   .1440684E-01   .1420170E-01
   .1385683E-01   .1334792E-01   .1278937E-01   .1242658E-01   .1227623E-01
   .1208927E-01   .1188603E-01   .1142629E-01   .1061965E-01   .9646336E-02
   .8443375E-02   .7170105E-02   .5999011E-02   .4881888E-02   .3849398E-02
   .2912056E-02   .2024408E-02   .1081192E-02  -.6310174E-04  -.1394225E-02
  -.2851696E-02  -.4353820E-02  -.5819832E-02  -.7251660E-02  -.8711556E-02
  -.1026779E-01  -.1192650E-01  -.1358347E-01  -.1510072E-01  -.1632046E-01
  -.1719866E-01  -.1781407E-01  -.1820834E-01  -.1843361E-01  -.1859511E-01
  -.1858339E-01  -.1806947E-01  -.1713010E-01  -.1576494E-01  -.1393353E-01
  -.1208639E-01  -.1047912E-01  -.9012257E-02  -.7723962E-02  -.6625512E-02
  -.5563527E-02  -.4427179E-02  -.3120445E-02  -.1745466E-02  -.4356540E-03
   .9328315E-03   .2387914E-02   .3830992E-02   .5422114E-02   .7222700E-02
   .9219876E-02   .1138621E-01   .1368173E-01   .1606241E-01   .1834901E-01
   .2047849E-01   .2245084E-01   .2440219E-01   .2644527E-01   .2857420E-01
   .3083728E-01   .3315381E-01   .3545106E-01   .3773325E-01   .3981597E-01
   .4171110E-01   .4344804E-01   .4498157E-01   .4632573E-01   .4744862E-01
   .4841934E-01   .4922682E-01   .4974388E-01   .4989428E-01   .4959032E-01
   .4881350E-01   .4772162E-01   .4644262E-01   .4503703E-01   .4351293E-01
   .4201925E-01   .4055043E-01   .3914235E-01   .3778098E-01   .3622569E-01
   .3457092E-01   .3272690E-01   .3048027E-01   .2789618E-01   .2502687E-01
   .2192398E-01   .1869991E-01   .1542337E-01   .1217490E-01   .8961234E-02
   .5721662E-02   .2391998E-02  -.9387277E-03  -.4079633E-02  -.7030745E-02
  -.9825284E-02  -.1247827E-01  -.1514161E-01  -.1772369E-01  -.1992242E-01
  -.2172681E-01  -.2304683E-01  -.2394116E-01  -.2482992E-01  -.2580147E-01
  -.2670392E-01  -.2756144E-01  -.2840515E-01  -.2922586E-01  -.3009900E-01
  -.3115326E-01  -.3238900E-01  -.3365852E-01  -.3506128E-01  -.3662906E-01
  -.3820703E-01  -.3984009E-01  -.4161006E-01  -.4339999E-01  -.4500504E-01
  -.4641119E-01  -.4766263E-01  -.4875659E-01  -.4974702E-01  -.5056690E-01
  -.5115303E-01  -.5152191E-01  -.5161469E-01  -.5158167E-01  -.5166374E-01
  -.5180103E-01  -.5186558E-01  -.5190772E-01  -.5179012E-01  -.5158017E-01
  -.5149417E-01  -.5152734E-01  -.5171630E-01  -.5184982E-01  -.5173147E-01
  -.5138258E-01  -.5093623E-01  -.5066200E-01  -.5071664E-01  -.5106918E-01
  -.5167630E-01  -.5240572E-01  -.5335204E-01  -.5469104E-01  -.5631896E-01
  -.5821140E-01  -.6026381E-01  -.6234310E-01  -.6437121E-01  -.6634322E-01
  -.6832936E-01  -.7019679E-01  -.7180055E-01  -.7308627E-01  -.7406350E-01
  -.7473126E-01  -.7506935E-01  -.7523072E-01  -.7523514E-01  -.7497509E-01
  -.7460123E-01  -.7422002E-01  -.7384370E-01  -.7347409E-01  -.7274316E-01
  -.7150372E-01  -.7009980E-01  -.6892501E-01  -.6827284E-01  -.6778351E-01
  -.6671369E-01  -.6471064E-01  -.6187961E-01  -.5859451E-01  -.5502981E-01
  -.5120431E-01  -.4709704E-01  -.4263853E-01  -.3779068E-01  -.3234932E-01
  -.2633585E-01  -.1977289E-01  -.1278738E-01  -.5789998E-02   .1127761E-02
   .7801577E-02   .1404402E-01   .2005688E-01   .2599367E-01   .3186595E-01
   .3782392E-01   .4391572E-01   .5004392E-01   .5602133E-01   .6176229E-01
   .6725049E-01   .7232341E-01   .7690228E-01   .8092637E-01   .8443174E-01
   .8757741E-01   .9047333E-01   .9334168E-01   .9621767E-01   .9883373E-01
   .1011463E+00   .1030573E+00   .1044892E+00   .1056760E+00   .1066192E+00
   .1073412E+00   .1079761E+00   .1084384E+00   .1087652E+00   .1089272E+00
   .1088561E+00   .1085926E+00   .1080080E+00   .1070553E+00   .1057428E+00
   .1040846E+00   .1021220E+00   .9985199E-01   .9732740E-01   .9461358E-01
   .9162484E-01   .8838564E-01   .8495991E-01   .8117806E-01   .7715209E-01
   .7309091E-01   .6914293E-01   .6548079E-01   .6210481E-01   .5891908E-01
   .5588567E-01   .5311993E-01   .5062275E-01   .4841036E-01   .4644988E-01
   .4445765E-01   .4244374E-01   .4045143E-01   .3846285E-01   .3665354E-01
   .3496292E-01   .3329706E-01   .3162452E-01   .2983303E-01   .2796353E-01
   .2602164E-01   .2402304E-01   .2232208E-01   .2105578E-01   .1985141E-01
   .1837757E-01   .1661651E-01   .1471469E-01   .1277863E-01   .1089011E-01
   .8938652E-02   .6739851E-02   .4299752E-02   .1648168E-02  -.1186097E-02
  -.4160383E-02  -.7251911E-02  -.1043028E-01  -.1362158E-01  -.1672451E-01
  -.1963317E-01  -.2227881E-01  -.2467826E-01  -.2688096E-01  -.2888674E-01
  -.3067886E-01  -.3231285E-01  -.3369424E-01  -.3467501E-01  -.3551872E-01
  -.3647147E-01  -.3747794E-01  -.3845852E-01  -.3916222E-01  -.3941444E-01
  -.3922059E-01  -.3843089E-01  -.3721852E-01  -.3581706E-01  -.3405350E-01
  -.3190707E-01  -.2937498E-01  -.2653683E-01  -.2381249E-01  -.2135793E-01
  -.1949031E-01  -.1859076E-01  -.1849289E-01  -.1930907E-01  -.2091282E-01
  -.2289698E-01  -.2534918E-01  -.2813075E-01  -.3093721E-01  -.3355993E-01
  -.3569116E-01  -.3720367E-01  -.3823909E-01  -.3908070E-01  -.3986216E-01
  -.4061688E-01  -.4141093E-01  -.4205301E-01  -.4244236E-01  -.4289731E-01
  -.4360119E-01  -.4453295E-01  -.4571651E-01  -.4699149E-01  -.4809811E-01
  -.4915438E-01  -.5032305E-01  -.5141800E-01  -.5256381E-01  -.5374401E-01
  -.5444795E-01  -.5474227E-01  -.5484738E-01  -.5457351E-01  -.5405923E-01
  -.5341208E-01  -.5235690E-01  -.5092634E-01  -.4923243E-01  -.4726547E-01
  -.4511191E-01  -.4275125E-01  -.4027973E-01  -.3764840E-01  -.3485372E-01
  -.3208399E-01  -.2927558E-01  -.2645647E-01  -.2376187E-01  -.2140900E-01
  -.1941931E-01  -.1735533E-01  -.1499180E-01  -.1258663E-01  -.1037181E-01
  -.8527820E-02  -.6994779E-02  -.5439906E-02  -.3675616E-02  -.1481825E-02
   .1372694E-02   .4834891E-02   .8797266E-02   .1321394E-01   .1759846E-01
   .2200812E-01   .2696395E-01   .3215216E-01   .3745692E-01   .4286309E-01
   .4818650E-01   .5358762E-01   .5943109E-01   .6585952E-01   .7265050E-01
   .7929798E-01   .8493643E-01   .8933540E-01   .9274638E-01   .9551524E-01
   .9819534E-01   .1010056E+00   .1037811E+00   .1063502E+00   .1087011E+00
   .1106820E+00   .1122896E+00   .1135301E+00   .1143198E+00   .1149759E+00
   .1155491E+00   .1158311E+00   .1156673E+00   .1150362E+00   .1141163E+00
   .1127448E+00   .1110381E+00   .1090562E+00   .1065826E+00   .1038396E+00
   .1008393E+00   .9752307E-01   .9398185E-01   .9016390E-01   .8593994E-01
   .8125595E-01   .7606491E-01   .7044494E-01   .6460322E-01   .5882987E-01
   .5332140E-01   .4763220E-01   .4168175E-01   .3557570E-01   .2899976E-01
   .2237497E-01   .1601396E-01   .9516639E-02   .2724060E-02  -.4596589E-02
  -.1249176E-01  -.2061330E-01  -.2859769E-01  -.3606761E-01  -.4311936E-01
  -.5004067E-01  -.5699003E-01  -.6396109E-01  -.7063190E-01  -.7691134E-01
  -.8273464E-01  -.8806019E-01  -.9326100E-01  -.9853082E-01  -.1037356E+00
  -.1086049E+00  -.1127568E+00  -.1158559E+00  -.1178657E+00  -.1190258E+00
  -.1196062E+00  -.1195359E+00  -.1186149E+00  -.1169409E+00  -.1144451E+00
  -.1108819E+00  -.1063895E+00  -.1011844E+00  -.9550580E-01  -.8987605E-01
  -.8439453E-01  -.7890246E-01  -.7338433E-01  -.6777005E-01  -.6225373E-01
  -.5713675E-01  -.5243433E-01  -.4769812E-01  -.4276763E-01  -.3757511E-01
  -.3204428E-01  -.2667464E-01  -.2146278E-01  -.1636865E-01  -.1140397E-01
  -.6465744E-02  -.1669572E-02   .2787536E-02   .6546887E-02   .9549485E-02
   .1180199E-01   .1345592E-01   .1474032E-01   .1571266E-01   .1643660E-01
   .1699440E-01   .1746421E-01   .1774694E-01   .1794342E-01   .1819495E-01
   .1824821E-01   .1809075E-01   .1789795E-01   .1761204E-01   .1743750E-01
   .1755490E-01   .1768627E-01   .1788606E-01   .1820934E-01   .1854401E-01
   .1907472E-01   .1974723E-01   .2035264E-01   .2082511E-01   .2114456E-01
   .2113557E-01   .2079665E-01   .2027436E-01   .1971224E-01   .1921418E-01
   .1867209E-01   .1806932E-01   .1716006E-01   .1585934E-01   .1447332E-01
   .1331425E-01   .1269759E-01   .1271237E-01   .1337635E-01   .1454486E-01
   .1587197E-01   .1706535E-01   .1812342E-01   .1908784E-01   .1987441E-01
   .2059351E-01   .2093726E-01   .2062636E-01   .1982813E-01   .1848900E-01
   .1677840E-01   .1485482E-01   .1260994E-01   .9953669E-02   .6803950E-02
   .3473007E-02   .3666139E-03  -.2494497E-02  -.5106880E-02  -.7426620E-02
  -.9787539E-02  -.1235873E-01  -.1481409E-01  -.1694241E-01  -.1873403E-01
  -.2028363E-01  -.2175365E-01  -.2335112E-01  -.2512631E-01  -.2683783E-01
  -.2813263E-01  -.2899202E-01  -.2951260E-01  -.2969569E-01  -.2981897E-01
  -.2998096E-01  -.2990037E-01  -.2943041E-01  -.2866911E-01  -.2760666E-01
  -.2621246E-01  -.2458880E-01  -.2274259E-01  -.2065791E-01  -.1849168E-01
  -.1637447E-01  -.1414997E-01  -.1156416E-01  -.8753028E-02  -.6027173E-02
  -.3586884E-02  -.1505167E-02   .2978958E-03   .1883423E-02   .3238135E-02
   .4399087E-02   .5542973E-02   .6673072E-02   .7778087E-02   .8900478E-02
   .9873371E-02   .1070098E-01   .1142481E-01   .1197284E-01   .1246212E-01
   .1302693E-01   .1363788E-01   .1422884E-01   .1472017E-01   .1492130E-01
   .1469780E-01   .1418417E-01   .1357623E-01   .1291447E-01   .1224185E-01
   .1142962E-01   .1034691E-01   .8962816E-02   .7169417E-02   .5238540E-02
   .3535506E-02   .2099003E-02   .9356444E-03  -.2423974E-04  -.7136405E-03
  -.8937117E-03  -.4059754E-03   .9671852E-03   .3228040E-02   .6088316E-02
   .9223599E-02   .1246200E-01   .1520923E-01   .1680666E-01   .1733085E-01
   .1694639E-01   .1619667E-01   .1559078E-01   .1519808E-01   .1495884E-01
   .1460884E-01   .1414373E-01   .1350786E-01   .1270734E-01   .1190958E-01
   .1103626E-01   .1006138E-01   .8751405E-02   .7031206E-02   .4948974E-02
   .1940261E-02  -.2329134E-02  -.7584207E-02  -.1293039E-01  -.1724206E-01
  -.1986280E-01  -.2074237E-01  -.2049720E-01  -.1964095E-01  -.1835134E-01
  -.1671185E-01  -.1469945E-01  -.1246500E-01  -.1004717E-01  -.7587064E-02
  -.5238835E-02  -.2864107E-02  -.4193893E-03   .2303994E-02   .5482159E-02
   .9044389E-02   .1292430E-01   .1703478E-01   .2144382E-01   .2630903E-01
   .3166474E-01   .3771950E-01   .4442805E-01   .5131153E-01   .5786845E-01
   .6354565E-01   .6816030E-01   .7201646E-01   .7535704E-01   .7833997E-01
   .8104337E-01   .8334248E-01   .8507059E-01   .8622802E-01   .8690340E-01
   .8717540E-01   .8728350E-01   .8724502E-01   .8689807E-01   .8626647E-01
   .8523326E-01   .8364755E-01   .8171357E-01   .7970892E-01   .7761064E-01
   .7524352E-01   .7247989E-01   .6927883E-01   .6556550E-01   .6125161E-01
   .5647434E-01   .5133154E-01   .4588040E-01   .4036863E-01   .3502869E-01
   .3013203E-01   .2578867E-01   .2196943E-01   .1882060E-01   .1636186E-01
   .1451518E-01   .1318638E-01   .1211378E-01   .1121065E-01   .1028159E-01
   .9154372E-02   .8070100E-02   .7051203E-02   .6096566E-02   .5180200E-02
   .4319651E-02   .3588477E-02   .2682010E-02   .1412772E-02  -.3842451E-03
  -.2957812E-02  -.6184352E-02  -.9860768E-02  -.1398061E-01  -.1859258E-01
  -.2392698E-01  -.3034296E-01  -.3772035E-01  -.4550965E-01  -.5330035E-01
  -.6075480E-01  -.6795917E-01  -.7511662E-01  -.8200815E-01  -.8855260E-01
  -.9465874E-01  -.1003023E+00  -.1055964E+00  -.1105295E+00  -.1148033E+00
  -.1181009E+00  -.1204715E+00  -.1219125E+00  -.1226562E+00  -.1230158E+00
  -.1231359E+00  -.1231941E+00  -.1232027E+00  -.1231248E+00  -.1229119E+00
  -.1225357E+00  -.1222193E+00  -.1220830E+00  -.1221340E+00  -.1223289E+00
  -.1224540E+00  -.1226204E+00  -.1228360E+00  -.1229701E+00  -.1229705E+00
  -.1226221E+00  -.1217935E+00  -.1207605E+00  -.1198837E+00  -.1192323E+00
  -.1188411E+00  -.1186016E+00  -.1182678E+00  -.1177034E+00  -.1169285E+00
  -.1161366E+00  -.1153896E+00  -.1145298E+00  -.1133557E+00  -.1116348E+00
  -.1092154E+00  -.1060727E+00  -.1021369E+00  -.9724388E-01  -.9124239E-01
  -.8414072E-01  -.7612724E-01  -.6745366E-01  -.5857246E-01  -.4998064E-01
  -.4205868E-01  -.3466924E-01  -.2749921E-01  -.2065500E-01  -.1416735E-01
  -.8147101E-02  -.2737460E-02   .2247094E-02   .7034530E-02   .1168440E-01
   .1627339E-01   .2081685E-01   .2519245E-01   .2933749E-01   .3325262E-01
   .3700897E-01   .4060275E-01   .4414379E-01   .4779145E-01   .5140175E-01
   .5502618E-01   .5867654E-01   .6213875E-01   .6524882E-01   .6769511E-01
   .6955727E-01   .7130991E-01   .7322008E-01   .7540971E-01   .7786258E-01
   .8048089E-01   .8317922E-01   .8583873E-01   .8831809E-01   .9055318E-01
   .9260022E-01   .9454172E-01   .9657665E-01   .9879883E-01   .1010412E+00
   .1031426E+00   .1048383E+00   .1060600E+00   .1070236E+00   .1076231E+00
   .1078822E+00   .1077807E+00   .1070310E+00   .1056868E+00   .1036340E+00
   .1008034E+00   .9738856E-01   .9348531E-01   .8926924E-01   .8480701E-01
   .8021669E-01   .7564813E-01   .7107228E-01   .6650777E-01   .6204906E-01
   .5766582E-01   .5329331E-01   .4893632E-01   .4438393E-01   .3961036E-01
   .3479013E-01   .2982134E-01   .2477502E-01   .1982214E-01   .1493571E-01
   .1025898E-01   .5932676E-02   .1884049E-02  -.1696392E-02  -.4634512E-02
  -.7115059E-02  -.9259624E-02  -.1118484E-01  -.1288493E-01  -.1453518E-01
  -.1614505E-01  -.1742596E-01  -.1857385E-01  -.1948494E-01  -.1994228E-01
  -.2002360E-01  -.1984177E-01  -.1952282E-01  -.1917000E-01  -.1895373E-01
  -.1867772E-01  -.1818641E-01  -.1753254E-01  -.1666907E-01  -.1563641E-01
  -.1439944E-01  -.1302671E-01  -.1167629E-01  -.1039855E-01  -.9253865E-02
  -.8347241E-02  -.7798232E-02  -.7485758E-02  -.7299758E-02  -.7248869E-02
  -.7192692E-02  -.7229143E-02  -.7488408E-02  -.7939064E-02  -.8679470E-02
  -.9780648E-02  -.1111058E-01  -.1253085E-01  -.1416259E-01  -.1614967E-01
  -.1855610E-01  -.2157423E-01  -.2528413E-01  -.2954452E-01  -.3418147E-01
  -.3892013E-01  -.4344769E-01  -.4763468E-01  -.5155087E-01  -.5524447E-01
  -.5857003E-01  -.6134870E-01  -.6335682E-01  -.6439365E-01  -.6461214E-01
  -.6422391E-01  -.6348289E-01  -.6254595E-01  -.6147135E-01  -.6039182E-01
  -.5919450E-01  -.5770315E-01  -.5580911E-01  -.5233621E-01  -.4462186E-01
  -.3192488E-01  -.1713967E-01  -.4245336E-02   .4374239E-02   .9143746E-02
   .1202072E-01   .1474387E-01   .1806679E-01   .2193479E-01   .2579459E-01
   .2899122E-01   .3152754E-01   .3361398E-01   .3547121E-01   .3732263E-01
   .3891653E-01   .4005933E-01   .4077098E-01   .4100644E-01   .4097161E-01
   .4074911E-01   .4027114E-01   .3961192E-01   .3870396E-01   .3740334E-01
   .3572729E-01   .3371150E-01   .3117354E-01   .2826121E-01   .2521257E-01
   .2202932E-01   .1889185E-01   .1567390E-01   .1236184E-01   .8956439E-02
   .5370196E-02   .2150225E-02  -.3186024E-03  -.1987294E-02  -.2843740E-02
  -.2932506E-02  -.2564549E-02  -.1912671E-02  -.9604995E-03   .7951500E-04
   .1147049E-02   .2251996E-02   .3204917E-02   .3912358E-02   .4467708E-02
   .4721004E-02   .4588429E-02   .4045465E-02   .3257430E-02   .2521028E-02
   .1880834E-02   .1455818E-02   .1304124E-02   .1187820E-02   .1099723E-02
   .1354313E-02   .1932215E-02   .2931897E-02   .4422404E-02   .6101874E-02
   .7803390E-02   .9522269E-02   .1125609E-01   .1303390E-01   .1495246E-01
   .1675745E-01   .1849428E-01   .2032272E-01   .2201299E-01   .2356371E-01
   .2492378E-01   .2612466E-01   .2713340E-01   .2789169E-01   .2863849E-01
   .2934149E-01   .2993031E-01   .3044569E-01   .3075308E-01   .3097289E-01
   .3119103E-01   .3132276E-01   .3141842E-01   .3136922E-01   .3119580E-01
   .3090099E-01   .3047459E-01   .2999921E-01   .2937502E-01   .2873610E-01
   .2823137E-01   .2782652E-01   .2758191E-01   .2749148E-01   .2756068E-01
   .2782896E-01   .2829282E-01   .2887877E-01   .2941177E-01   .2995355E-01
   .3047365E-01   .3078218E-01   .3112676E-01   .3162418E-01   .3217684E-01
   .3280732E-01   .3338200E-01   .3392870E-01   .3434923E-01   .3457440E-01
   .3480622E-01   .3500001E-01   .3495078E-01   .3439811E-01   .3321838E-01
   .3137708E-01   .2883637E-01   .2568553E-01   .2217524E-01   .1839479E-01
   .1448810E-01   .1069676E-01   .7085674E-02   .3799290E-02   .7004009E-03
  -.2236561E-02  -.4840670E-02  -.7120754E-02  -.9065975E-02  -.1070559E-01
  -.1222313E-01  -.1392973E-01  -.1581589E-01  -.1781571E-01  -.1974163E-01
  -.2143629E-01  -.2320331E-01  -.2495535E-01  -.2668165E-01  -.2850982E-01
  -.3011742E-01  -.3165962E-01  -.3307823E-01  -.3414239E-01  -.3510553E-01
  -.3583438E-01  -.3644673E-01  -.3704312E-01  -.3733562E-01  -.3752385E-01
  -.3783860E-01  -.3814170E-01  -.3866156E-01  -.3954289E-01  -.4045793E-01
  -.4148879E-01  -.4271428E-01  -.4392640E-01  -.4522976E-01  -.4677213E-01
  -.4842124E-01  -.5006575E-01  -.5159497E-01  -.5294800E-01  -.5419899E-01
  -.5540467E-01  -.5644359E-01  -.5727642E-01  -.5794303E-01  -.5830994E-01
  -.5813519E-01  -.5745963E-01  -.5638665E-01  -.5462967E-01  -.5240970E-01
  -.4966425E-01  -.4620287E-01  -.4225939E-01  -.3773433E-01  -.3293118E-01
  -.2812105E-01  -.2338718E-01  -.1885826E-01  -.1448020E-01  -.1045339E-01
  -.6831109E-02  -.3369150E-02  -.9958596E-04   .2869334E-02   .5700784E-02
   .8461926E-02   .1101634E-01   .1313631E-01   .1493700E-01   .1639434E-01
   .1728702E-01   .1776567E-01   .1783027E-01   .1770899E-01   .1743697E-01
   .1702220E-01   .1675913E-01   .1675259E-01   .1697704E-01   .1726725E-01
   .1758456E-01   .1785358E-01   .1773136E-01   .1711161E-01   .1617393E-01
   .1474866E-01   .1288137E-01   .1059778E-01   .7887188E-02   .5144730E-02
   .2402827E-02  -.5849901E-05  -.1834875E-02  -.3140200E-02  -.3731444E-02
  -.3841219E-02  -.3447513E-02  -.2540469E-02  -.1478731E-02  -.4064253E-03
   .4955539E-03   .1128418E-02   .1588886E-02   .1978776E-02   .2408453E-02
   .3083382E-02   .4007970E-02   .5092168E-02   .6375244E-02   .7620436E-02
   .8703031E-02   .9777278E-02   .1080059E-01   .1186941E-01   .1321065E-01
   .1488276E-01   .1690257E-01   .1899424E-01   .2084239E-01   .2221262E-01
   .2283005E-01   .2281945E-01   .2244552E-01   .2203589E-01   .2179688E-01
   .2176768E-01   .2201758E-01   .2247942E-01   .2304382E-01   .2357655E-01
   .2396856E-01   .2420826E-01   .2451530E-01   .2486166E-01   .2505729E-01
   .2508414E-01   .2491979E-01   .2435204E-01   .2336136E-01   .2240222E-01
   .2140636E-01   .2048047E-01   .1970213E-01   .1873572E-01   .1775734E-01
   .1679813E-01   .1596446E-01   .1532392E-01   .1468221E-01   .1405041E-01
   .1324253E-01   .1217939E-01   .1101180E-01   .9750528E-02   .8639289E-02
   .7815890E-02   .7136296E-02   .6844965E-02   .7054524E-02   .7535654E-02
   .8177075E-02   .8954520E-02   .1011021E-01   .1157105E-01   .1315053E-01
   .1509280E-01   .1727463E-01   .1960801E-01   .2210000E-01   .2461258E-01
   .2713747E-01   .2956945E-01   .3184955E-01   .3370999E-01   .3513137E-01
   .3635439E-01   .3720289E-01   .3778392E-01   .3822870E-01   .3826225E-01
   .3794701E-01   .3736699E-01   .3638338E-01   .3506093E-01   .3348863E-01
   .3171093E-01   .2975805E-01   .2762101E-01   .2534023E-01   .2309734E-01
   .2083989E-01   .1844700E-01   .1626206E-01   .1427413E-01   .1216687E-01
   .1002872E-01   .7746166E-02   .5252396E-02   .2826496E-02   .6661386E-03
  -.1157363E-02  -.2677611E-02  -.3864341E-02  -.4921955E-02  -.6019538E-02
  -.7297406E-02  -.8906591E-02  -.1046162E-01  -.1185716E-01  -.1308672E-01
  -.1405329E-01  -.1490041E-01  -.1571023E-01  -.1639888E-01  -.1677749E-01
  -.1685205E-01  -.1664564E-01  -.1627887E-01  -.1586754E-01  -.1546436E-01
  -.1522384E-01  -.1514054E-01  -.1499727E-01  -.1477032E-01  -.1459121E-01
  -.1439672E-01  -.1421270E-01  -.1407308E-01  -.1399514E-01  -.1403596E-01
  -.1411355E-01  -.1427455E-01  -.1451882E-01  -.1482167E-01  -.1518783E-01
  -.1551337E-01  -.1583966E-01  -.1621026E-01  -.1669198E-01  -.1743309E-01
  -.1861170E-01  -.2016216E-01  -.2187893E-01  -.2374037E-01  -.2556436E-01
  -.2712718E-01  -.2847407E-01  -.2961602E-01  -.3032385E-01  -.3061163E-01
  -.3073648E-01  -.3087703E-01  -.3131992E-01  -.3207702E-01  -.3291101E-01
  -.3363968E-01  -.3406507E-01  -.3422528E-01  -.3418557E-01  -.3410144E-01
  -.3411695E-01  -.3415419E-01  -.3432097E-01  -.3463853E-01  -.3490474E-01
  -.3501699E-01  -.3482055E-01  -.3424211E-01  -.3342391E-01  -.3247082E-01
  -.3166473E-01  -.3114042E-01  -.3070828E-01  -.3034227E-01  -.2985126E-01
  -.2900470E-01  -.2790184E-01  -.2655988E-01  -.2501313E-01  -.2328932E-01
  -.2134988E-01  -.1929876E-01  -.1708845E-01  -.1458308E-01  -.1192606E-01
  -.9603863E-02  -.7874024E-02  -.6538441E-02  -.5611098E-02  -.5040028E-02
  -.4660801E-02  -.4606567E-02  -.4743374E-02  -.4958839E-02  -.5189719E-02
  -.5273301E-02  -.5319291E-02  -.5203972E-02  -.4860222E-02  -.4376134E-02
  -.3557614E-02  -.2522437E-02  -.1303781E-02   .2485649E-04   .1127483E-02
   .2028952E-02   .2628093E-02   .2855785E-02   .2626710E-02   .1984685E-02
   .1027368E-02  -.4019454E-03  -.2184941E-02  -.4381593E-02  -.6841012E-02
  -.9111482E-02  -.1109354E-01  -.1270655E-01  -.1380581E-01  -.1437515E-01
  -.1456090E-01  -.1439581E-01  -.1396394E-01  -.1334038E-01  -.1271029E-01
  -.1227619E-01  -.1194753E-01  -.1183090E-01  -.1179680E-01  -.1172828E-01
  -.1169576E-01  -.1166064E-01  -.1178367E-01  -.1199852E-01  -.1217842E-01
  -.1238396E-01  -.1231527E-01  -.1176826E-01  -.1084823E-01  -.9512709E-02
  -.7755948E-02  -.5717373E-02  -.3616265E-02  -.1568463E-02   .4490244E-03
   .2426298E-02   .4467295E-02   .6695856E-02   .9049248E-02   .1155182E-01
   .1413855E-01   .1676594E-01   .1954476E-01   .2247420E-01   .2548595E-01
   .2844286E-01   .3119094E-01   .3366065E-01   .3593970E-01   .3798977E-01
   .3975031E-01   .4133850E-01   .4268658E-01   .4367459E-01   .4429722E-01
   .4455794E-01   .4442198E-01   .4388558E-01   .4307715E-01   .4200351E-01
   .4071644E-01   .3940297E-01   .3801155E-01   .3647654E-01   .3493490E-01
   .3332276E-01   .3148673E-01   .2944169E-01   .2718412E-01   .2469100E-01
   .2209405E-01   .1969058E-01   .1760983E-01   .1580239E-01   .1435865E-01
   .1333427E-01   .1269632E-01   .1249700E-01   .1275514E-01   .1354834E-01
   .1480236E-01   .1635813E-01   .1816611E-01   .2002592E-01   .2175138E-01
   .2321221E-01   .2430487E-01   .2504206E-01   .2549374E-01   .2568864E-01
   .2567989E-01   .2551524E-01   .2517484E-01   .2470973E-01   .2411746E-01
   .2330309E-01   .2231130E-01   .2119898E-01   .1994777E-01   .1863176E-01
   .1720870E-01   .1562282E-01   .1373428E-01   .1135584E-01   .8563594E-02
   .5324348E-02   .1772736E-02  -.1814157E-02  -.5223804E-02  -.8223765E-02
  -.1083990E-01  -.1313650E-01  -.1514499E-01  -.1686371E-01  -.1818176E-01
  -.1894984E-01  -.1915400E-01  -.1893876E-01  -.1844248E-01  -.1777883E-01
  -.1700917E-01  -.1620802E-01  -.1534961E-01  -.1449655E-01  -.1388518E-01
  -.1361389E-01  -.1373759E-01  -.1424959E-01  -.1501958E-01  -.1592019E-01
  -.1699638E-01  -.1829818E-01  -.1971133E-01  -.2108788E-01  -.2232657E-01
  -.2337652E-01  -.2407225E-01  -.2439687E-01  -.2453613E-01  -.2463108E-01
  -.2479121E-01  -.2492276E-01  -.2499314E-01  -.2495011E-01  -.2455431E-01
  -.2393339E-01  -.2328187E-01  -.2278465E-01  -.2261722E-01  -.2260211E-01
  -.2269262E-01  -.2282929E-01  -.2281015E-01  -.2269262E-01  -.2251262E-01
  -.2218897E-01  -.2163918E-01  -.2071758E-01  -.1937142E-01  -.1763837E-01
  -.1570801E-01  -.1378470E-01  -.1191942E-01  -.1026943E-01  -.8912114E-02
  -.7700083E-02  -.6571190E-02  -.5552741E-02  -.4614839E-02  -.3777914E-02
  -.3130954E-02  -.2825800E-02  -.2783564E-02  -.2817723E-02  -.2929700E-02
  -.2974568E-02  -.2925778E-02  -.2881822E-02  -.2817978E-02  -.2803337E-02
  -.2908785E-02  -.3076950E-02  -.3330089E-02  -.3700460E-02  -.4069970E-02
  -.4362730E-02  -.4615804E-02  -.4836604E-02  -.5046776E-02  -.5173529E-02
  -.4918127E-02  -.4248898E-02  -.3371955E-02  -.2412885E-02  -.1507052E-02
  -.7053743E-03   .5265743E-04   .8185434E-03   .1590341E-02   .2495037E-02
   .3556617E-02   .4745018E-02   .6244495E-02   .8013853E-02   .9970264E-02
   .1214713E-01   .1440201E-01   .1657676E-01   .1862889E-01   .2046347E-01
   .2208217E-01   .2357144E-01   .2479736E-01   .2569838E-01   .2625822E-01
   .2633516E-01   .2591528E-01   .2498758E-01   .2350776E-01   .2156404E-01
   .1915934E-01   .1617223E-01   .1272373E-01   .9027012E-02   .5188875E-02
   .1342326E-02  -.2434462E-02  -.6030963E-02  -.9274347E-02  -.1197727E-01
  -.1392375E-01  -.1516646E-01  -.1590358E-01  -.1625158E-01  -.1653515E-01
  -.1692386E-01  -.1731533E-01  -.1774914E-01  -.1815268E-01  -.1836032E-01
  -.1839667E-01  -.1827285E-01  -.1800157E-01  -.1768847E-01  -.1740564E-01
  -.1718011E-01  -.1689682E-01  -.1637841E-01  -.1559156E-01  -.1452991E-01
  -.1315580E-01  -.1167220E-01  -.1023500E-01  -.8833343E-02  -.7498757E-02
  -.6186765E-02  -.4798500E-02  -.3157932E-02  -.1255562E-02   .8139132E-03
   .3018903E-02   .5239336E-02   .7446061E-02   .9571988E-02   .1153351E-01
   .1342024E-01   .1524840E-01   .1693841E-01   .1839831E-01   .1962322E-01
   .2063238E-01   .2142745E-01   .2201068E-01   .2237984E-01   .2265092E-01
   .2288969E-01   .2306261E-01   .2316988E-01   .2319988E-01   .2318859E-01
   .2319638E-01   .2317187E-01   .2317962E-01   .2323098E-01   .2313330E-01
   .2283392E-01   .2227496E-01   .2144060E-01   .2049401E-01   .1942072E-01
   .1810626E-01   .1656612E-01   .1488837E-01   .1325050E-01   .1175859E-01
   .1034044E-01   .8915462E-02   .7329877E-02   .5488283E-02   .3460158E-02
   .1313092E-02  -.8422307E-03  -.3006496E-02  -.5183845E-02  -.7277408E-02
  -.9182889E-02  -.1070553E-01  -.1177434E-01  -.1250580E-01  -.1304755E-01
  -.1353291E-01  -.1394715E-01  -.1415148E-01  -.1393503E-01  -.1312100E-01
  -.1177116E-01  -.1009066E-01  -.8303245E-02  -.6560355E-02  -.4877364E-02
  -.3236426E-02  -.1682178E-02  -.1603955E-03   .1328269E-02   .2719830E-02
   .3992277E-02   .5172389E-02   .6326796E-02   .7376407E-02   .8355708E-02
   .9190173E-02   .9798810E-02   .1024932E-01   .1049019E-01   .1072524E-01
   .1101034E-01   .1122933E-01   .1142692E-01   .1143877E-01   .1117386E-01
   .1064039E-01   .9820689E-02   .8736682E-02   .7378314E-02   .5804796E-02
   .4057833E-02   .2167958E-02   .2601396E-03  -.1573780E-02  -.3216653E-02
  -.4518605E-02  -.5535834E-02  -.6329881E-02  -.6999230E-02  -.7669210E-02
  -.8329091E-02  -.9135026E-02  -.1000681E-01  -.1067204E-01  -.1113341E-01
  -.1145873E-01  -.1171483E-01  -.1199925E-01  -.1233307E-01  -.1257682E-01
  -.1270454E-01  -.1279922E-01  -.1289493E-01  -.1293342E-01  -.1276511E-01
  -.1222156E-01  -.1120152E-01  -.9798608E-02  -.8183295E-02  -.6553237E-02
  -.4987659E-02  -.3534639E-02  -.2319256E-02  -.1307243E-02  -.4268710E-03
   .2334513E-03   .6733173E-03   .1040031E-02   .1374445E-02   .1656649E-02
   .1890235E-02   .2118483E-02   .2337053E-02   .2478871E-02   .2516063E-02
   .2441268E-02   .2131882E-02   .1470180E-02   .5399240E-03  -.5704775E-03
  -.1822918E-02  -.3183279E-02  -.4676561E-02  -.6295418E-02  -.7957076E-02
  -.9616532E-02  -.1133497E-01  -.1312859E-01  -.1486054E-01  -.1649151E-01
  -.1797747E-01  -.1921719E-01  -.2019972E-01  -.2086230E-01  -.2135867E-01
  -.2172261E-01  -.2184831E-01  -.2187868E-01  -.2180273E-01  -.2144847E-01
  -.2074636E-01  -.1977330E-01  -.1854104E-01  -.1705070E-01  -.1537059E-01
  -.1344425E-01  -.1128483E-01  -.8998198E-02  -.6504776E-02  -.3830474E-02
  -.1174578E-02   .1286437E-02   .3379651E-02   .5117680E-02   .6615421E-02
   .7902576E-02   .9059296E-02   .1011879E-01   .1100971E-01   .1176615E-01
   .1236591E-01   .1284072E-01   .1334786E-01   .1383545E-01   .1413672E-01
   .1419812E-01   .1409152E-01   .1379922E-01   .1318440E-01   .1220145E-01
   .1094480E-01   .9423696E-02   .7751135E-02   .6197057E-02   .4784749E-02
   .3319311E-02   .1793553E-02   .4559792E-03  -.8670132E-03  -.2139879E-02
  -.3111987E-02  -.3995387E-02  -.4704847E-02  -.5259575E-02  -.5809644E-02
  -.6223915E-02  -.6507556E-02  -.6643248E-02  -.6689423E-02  -.6698298E-02
  -.6669503E-02  -.6629766E-02  -.6508008E-02  -.6435875E-02  -.6397423E-02
  -.6205691E-02  -.5816732E-02  -.5190063E-02  -.4327791E-02  -.3284489E-02
  -.2094680E-02  -.7592606E-03   .5511078E-03   .1730746E-02   .2904986E-02
   .3988964E-02   .4959290E-02   .5872537E-02   .6532551E-02   .6875811E-02
   .6981599E-02   .6806787E-02   .6346675E-02   .5792891E-02   .5199548E-02
   .4471117E-02   .3618738E-02   .2666039E-02   .1666555E-02   .6356768E-03
  -.3735279E-03  -.1223814E-02  -.1975841E-02  -.2731139E-02  -.3544970E-02
  -.4361031E-02  -.5008279E-02  -.5576479E-02  -.6012762E-02  -.6154827E-02
  -.6176497E-02  -.6155770E-02  -.6071414E-02  -.6082958E-02  -.6214935E-02
  -.6307723E-02  -.6481565E-02  -.6899215E-02  -.7611874E-02  -.8618650E-02
  -.9645679E-02  -.1059838E-01  -.1144020E-01  -.1209544E-01  -.1267205E-01
  -.1301715E-01  -.1301759E-01  -.1273712E-01  -.1221510E-01  -.1140261E-01
  -.1035640E-01  -.9307424E-02  -.8277460E-02  -.7322605E-02  -.6432167E-02
  -.5458671E-02  -.4320820E-02  -.3119429E-02  -.2075542E-02  -.1190448E-02
  -.5124596E-03  -.2316837E-03  -.2227134E-03  -.3191155E-03  -.4968559E-03
  -.8062248E-03  -.1241735E-02  -.1659008E-02  -.2078266E-02  -.2411439E-02
  -.2589324E-02  -.2855440E-02  -.3189552E-02  -.3352614E-02  -.3393434E-02
  -.3204194E-02  -.2831001E-02  -.2472966E-02  -.2054385E-02  -.1703805E-02
  -.1348159E-02  -.9331712E-03  -.6682759E-03  -.4842084E-03  -.3934505E-03
  -.3743155E-03  -.4369461E-03  -.6363736E-03  -.8785756E-03  -.1327916E-02
  -.2022019E-02  -.2940729E-02  -.4135335E-02  -.5353445E-02  -.6231713E-02
  -.6605485E-02  -.6491470E-02  -.6064197E-02  -.5524199E-02  -.4895629E-02
  -.4249308E-02  -.3640960E-02  -.3085806E-02  -.2639307E-02  -.2359327E-02
  -.2314773E-02  -.2414363E-02  -.2583652E-02  -.2828587E-02  -.3046568E-02
  -.3085185E-02  -.2957298E-02  -.2733237E-02  -.2437002E-02  -.2126607E-02
  -.1974177E-02  -.1903119E-02  -.1811449E-02  -.1801956E-02  -.1520126E-02
  -.9873688E-03  -.5120448E-03  -.2546273E-03  -.2498257E-03  -.3658740E-03
  -.6148549E-03  -.8738492E-03  -.1181686E-02  -.1477734E-02  -.1638676E-02
  -.1751192E-02  -.1699088E-02  -.1559360E-02  -.1557160E-02  -.1603954E-02
  -.1695533E-02  -.1807775E-02  -.1789460E-02  -.1614578E-02  -.1369312E-02
  -.1191023E-02  -.9995587E-03  -.6841565E-03  -.2750521E-03   .2197427E-03
   .7625898E-03   .1164662E-02   .1261035E-02   .1159926E-02   .9572147E-03
   .8117749E-03   .8813451E-03   .9617064E-03   .8830855E-03   .5848729E-03
   .1221453E-03  -.3475697E-03  -.7203619E-03  -.8100856E-03  -.6149222E-03
  -.3108746E-03   .1837905E-03   .9350856E-03   .1892293E-02   .3040284E-02
   .4289289E-02   .5615709E-02   .7065886E-02   .8666844E-02   .1036163E-01
   .1217669E-01   .1415561E-01   .1613409E-01   .1802626E-01   .1978637E-01
   .2141414E-01   .2300640E-01   .2448978E-01   .2580391E-01   .2684930E-01
   .2751887E-01   .2794576E-01   .2807526E-01   .2791685E-01   .2763163E-01
   .2715976E-01   .2656304E-01   .2595385E-01   .2526218E-01   .2436069E-01
   .2328804E-01   .2209251E-01   .2091955E-01   .2000672E-01   .1924114E-01
   .1852722E-01   .1786067E-01   .1713329E-01   .1637815E-01   .1572149E-01
   .1517109E-01   .1473522E-01   .1433094E-01   .1376387E-01   .1308321E-01
   .1245022E-01   .1189881E-01   .1146922E-01   .1115907E-01   .1084621E-01
   .1053621E-01   .1021342E-01   .9846559E-02   .9476824E-02   .8997860E-02
   .8321311E-02   .7333158E-02   .6091067E-02   .4896327E-02   .3857283E-02
   .2965401E-02   .2217215E-02   .1589837E-02   .9811452E-03   .3965908E-03
  -.3784420E-04  -.2506139E-03  -.1967931E-03  -.1005017E-03  -.2480121E-03
  -.6778781E-03  -.1264199E-02  -.1797031E-02  -.2258706E-02  -.2707140E-02
  -.3175662E-02  -.3814149E-02  -.4564854E-02  -.5189042E-02  -.5649336E-02
  -.5883744E-02  -.5761821E-02  -.5399476E-02  -.4955673E-02  -.4374560E-02
  -.3562810E-02  -.2570102E-02  -.1429219E-02  -.1982288E-03   .9192036E-03
   .1859863E-02   .2651821E-02   .3249452E-02   .3645638E-02   .3926283E-02
   .4186157E-02   .4444387E-02   .4849389E-02   .5431376E-02   .6088389E-02
   .6685562E-02   .7097842E-02   .7351249E-02   .7466099E-02   .7643026E-02
   .7998531E-02   .8436764E-02   .8868375E-02   .9163664E-02   .9197605E-02
   .9106406E-02   .9123049E-02   .9189008E-02   .9251019E-02   .9279033E-02
   .9031308E-02   .8415525E-02   .7543862E-02   .6500463E-02   .5513752E-02
   .4786016E-02   .4330683E-02   .4053274E-02   .3823198E-02   .3555534E-02
   .3197667E-02   .2737750E-02   .2170965E-02   .1555151E-02   .9302681E-03
   .2627605E-03  -.4787677E-03  -.1305910E-02  -.2139868E-02  -.2822780E-02
  -.3320386E-02  -.3593109E-02  -.3594762E-02  -.3460667E-02  -.3244612E-02
  -.3055636E-02  -.3056313E-02  -.3196115E-02  -.3474729E-02  -.3864567E-02
  -.4284121E-02  -.4900239E-02  -.5728410E-02  -.6657137E-02  -.7625656E-02
  -.8540297E-02  -.9434500E-02  -.1037534E-01  -.1143273E-01  -.1252630E-01
  -.1347001E-01  -.1407190E-01  -.1424111E-01  -.1415611E-01  -.1392882E-01
  -.1356539E-01  -.1320316E-01  -.1288702E-01  -.1265351E-01  -.1257569E-01
  -.1253553E-01  -.1247886E-01  -.1235957E-01  -.1209376E-01  -.1181874E-01
  -.1161122E-01  -.1147357E-01  -.1146616E-01  -.1157034E-01  -.1173966E-01
  -.1199110E-01  -.1230846E-01  -.1262722E-01  -.1295569E-01  -.1334128E-01
  -.1391471E-01  -.1473023E-01  -.1568529E-01  -.1653339E-01  -.1714966E-01
  -.1763032E-01  -.1807690E-01  -.1861942E-01  -.1930140E-01  -.2000220E-01
  -.2059639E-01  -.2106126E-01  -.2135210E-01  -.2159743E-01  -.2199368E-01
  -.2258200E-01  -.2323624E-01  -.2362607E-01  -.2352872E-01  -.2299632E-01
  -.2217721E-01  -.2133004E-01  -.2074202E-01  -.2034910E-01  -.1994564E-01
  -.1933492E-01  -.1831705E-01  -.1684618E-01  -.1495904E-01  -.1288058E-01
  -.1069887E-01  -.8401749E-02  -.6164037E-02  -.4013528E-02  -.2039241E-02
  -.4136002E-03   .8929738E-03   .1991497E-02   .2912266E-02   .3744146E-02
   .4566985E-02   .5209069E-02   .5456053E-02   .5260343E-02   .4697385E-02
   .3994627E-02   .3429429E-02   .3174408E-02   .3257146E-02   .3557694E-02
   .3912558E-02   .4212724E-02   .4399102E-02   .4317976E-02   .4007237E-02
   .3727922E-02   .3529408E-02   .3381741E-02   .3176043E-02   .2850513E-02
   .2414328E-02   .1782163E-02   .1086362E-02   .4413083E-03  -.1020199E-04
  -.1358006E-03  -.4074868E-04   .1644818E-03   .2790009E-03   .2216103E-03
   .8428716E-04  -.2340585E-04   .5782335E-04   .3365377E-03   .7474477E-03
   .1313182E-02   .1949103E-02   .2632319E-02   .3536665E-02   .4647586E-02
   .5940511E-02   .7375818E-02   .8771027E-02   .1009874E-01   .1122514E-01
   .1209966E-01   .1285758E-01   .1348680E-01   .1407265E-01   .1459437E-01
   .1501080E-01   .1539361E-01   .1560525E-01   .1572456E-01   .1567059E-01
   .1517612E-01   .1423824E-01   .1292057E-01   .1143884E-01   .1001433E-01
   .8732564E-02   .7549377E-02   .6453685E-02   .5469999E-02   .4642742E-02
   .3986288E-02   .3388166E-02   .2737585E-02   .1929945E-02   .8308101E-03
  -.4822465E-03  -.1915522E-02  -.3524947E-02  -.5198960E-02  -.6829774E-02
  -.8312957E-02  -.9529266E-02  -.1046295E-01  -.1112472E-01  -.1159780E-01
  -.1198184E-01  -.1228646E-01  -.1235105E-01  -.1195012E-01  -.1112843E-01
  -.1001216E-01  -.8692399E-02  -.7373428E-02  -.6166414E-02  -.5118798E-02
  -.4217166E-02  -.3295298E-02  -.2329011E-02  -.1424429E-02  -.6191747E-03
  -.6065945E-04   .1998934E-03   .2731503E-03   .1799982E-03   .4048087E-04
   .5583232E-04   .2271705E-03   .4600050E-03   .7262225E-03   .8952541E-03
   .9222852E-03   .9492861E-03   .1093732E-02   .1487078E-02   .2268690E-02
   .3356736E-02   .4530356E-02   .5694395E-02   .6773269E-02   .7762773E-02
   .8727761E-02   .9622816E-02   .1029756E-01   .1068787E-01   .1080522E-01
   .1072887E-01   .1053186E-01   .1025153E-01   .1003507E-01   .9867934E-02
   .9710888E-02   .9555883E-02   .9312286E-02   .8929585E-02   .8430297E-02
   .7819344E-02   .7106771E-02   .6500358E-02   .5990588E-02   .5505509E-02
   .5064125E-02   .4586640E-02   .4255517E-02   .4239296E-02   .4457873E-02
   .4777175E-02   .5105220E-02   .5447815E-02   .5900197E-02   .6483786E-02
   .7214817E-02   .8090672E-02   .8944723E-02   .9685915E-02   .1026162E-01
   .1070968E-01   .1103703E-01   .1110486E-01   .1095305E-01   .1072939E-01
   .1046777E-01   .1014984E-01   .9779537E-02   .9299440E-02   .8637575E-02
   .7882130E-02   .7161216E-02   .6503423E-02   .5928874E-02   .5414890E-02
   .4803572E-02   .3929509E-02   .2870785E-02   .1718556E-02   .5039278E-03
  -.6019186E-03  -.1449056E-02  -.2042974E-02  -.2401067E-02  -.2568487E-02
  -.2756118E-02  -.2961937E-02  -.3064409E-02  -.3086658E-02  -.3010013E-02
  -.2816242E-02  -.2531145E-02  -.2284214E-02  -.2127262E-02  -.2001739E-02
  -.2016206E-02  -.2274498E-02  -.2701202E-02  -.3281545E-02  -.3978407E-02
  -.4687131E-02  -.5419941E-02  -.6101389E-02  -.6715635E-02  -.7286957E-02
  -.7819626E-02  -.8354384E-02  -.8870843E-02  -.9418706E-02  -.1001554E-01
  -.1071299E-01  -.1159042E-01  -.1254531E-01  -.1349655E-01  -.1441879E-01
  -.1524159E-01  -.1603212E-01  -.1675043E-01  -.1723858E-01  -.1752687E-01
  -.1763555E-01  -.1755478E-01  -.1729542E-01  -.1689639E-01  -.1647157E-01
  -.1614753E-01  -.1590264E-01  -.1564014E-01  -.1537821E-01  -.1508455E-01
  -.1473991E-01  -.1449767E-01  -.1433126E-01  -.1400340E-01  -.1341491E-01
  -.1260265E-01  -.1170039E-01  -.1069931E-01  -.9533554E-02  -.8240458E-02
  -.6812558E-02  -.5425894E-02  -.4275441E-02  -.3239452E-02  -.2225347E-02
  -.1233216E-02  -.1986789E-03   .8149366E-03   .1707595E-02   .2401358E-02
   .2734285E-02   .2632921E-02   .2217601E-02   .1730810E-02   .1360279E-02
   .1078071E-02   .8307152E-03   .5499192E-03   .2265192E-03  -.1011889E-03
  -.4093081E-03  -.6525975E-03  -.8494162E-03  -.1057998E-02  -.1450247E-02
  -.2052906E-02  -.2784084E-02  -.3593917E-02  -.4393752E-02  -.5174494E-02
  -.5931132E-02  -.6689614E-02  -.7457959E-02  -.8165538E-02  -.8637466E-02
  -.8744038E-02  -.8610825E-02  -.8313496E-02  -.7968390E-02  -.7658696E-02
  -.7309856E-02  -.6938305E-02  -.6570636E-02  -.6217164E-02  -.5827448E-02
  -.5242938E-02  -.4491287E-02  -.3693274E-02  -.2877321E-02  -.2209733E-02
  -.1719026E-02  -.1303390E-02  -.8016702E-03  -.2047484E-04   .1065205E-02
   .2301433E-02   .3440814E-02   .4364883E-02   .4950082E-02   .5248202E-02
   .5473128E-02   .5688404E-02   .5968176E-02   .6264918E-02   .6424900E-02
   .6430897E-02   .6291399E-02   .6019602E-02   .5669346E-02   .5296264E-02
   .4928267E-02   .4627268E-02   .4341941E-02   .3985785E-02   .3688025E-02
   .3475099E-02   .3382230E-02   .3429157E-02   .3461140E-02   .3452856E-02
   .3439186E-02   .3473535E-02   .3650331E-02   .3972847E-02   .4312782E-02
   .4503774E-02   .4503618E-02   .4393189E-02   .4271404E-02   .4225995E-02
   .4255249E-02   .4372952E-02   .4523184E-02   .4629966E-02   .4792299E-02
   .5035025E-02   .5406700E-02   .5851623E-02   .6255191E-02   .6635014E-02
   .7002866E-02   .7387180E-02   .7798416E-02   .8292004E-02   .8753563E-02
   .9068790E-02   .9322236E-02   .9550315E-02   .9766421E-02   .1002193E-01
   .1022317E-01   .1020500E-01   .1002171E-01   .9709415E-02   .9323079E-02
   .8979262E-02   .8670793E-02   .8339751E-02   .7930459E-02   .7413906E-02
   .6828828E-02   .6210906E-02   .5622850E-02   .5155404E-02   .4755197E-02
   .4394677E-02   .4101198E-02   .3994893E-02   .4218266E-02   .4682838E-02
   .5101791E-02   .5230295E-02   .4987595E-02   .4384109E-02   .3527693E-02
   .2578672E-02   .1705665E-02   .9896355E-03   .4011157E-03  -.1678265E-03
  -.7838064E-03  -.1384715E-02  -.1946433E-02  -.2396481E-02  -.2624409E-02
  -.2697051E-02  -.2676027E-02  -.2601721E-02  -.2548391E-02  -.2510199E-02
  -.2481231E-02  -.2470882E-02  -.2511435E-02  -.2643553E-02  -.2847114E-02
  -.3137796E-02  -.3447914E-02  -.3621150E-02  -.3709801E-02  -.3758052E-02
  -.3661711E-02  -.3348481E-02  -.2835680E-02  -.2196852E-02  -.1484198E-02
  -.7450917E-03   .2369642E-04   .8126177E-03   .1534456E-02   .2049615E-02
   .2311330E-02   .2381721E-02   .2288549E-02   .2070805E-02   .1793645E-02
   .1483072E-02   .1170308E-02   .9485919E-03   .7889414E-03   .6322732E-03
   .5731445E-03   .6746448E-03   .8992715E-03   .1256271E-02   .1666734E-02
   .1938118E-02   .2143005E-02   .2442435E-02   .2890678E-02   .3526455E-02
   .4255079E-02   .4923010E-02   .5318054E-02   .5315248E-02   .4994823E-02
   .4474948E-02   .3928262E-02   .3447086E-02   .2977498E-02   .2487842E-02
   .2032767E-02   .1611726E-02   .1223428E-02   .9528418E-03   .7710904E-03
   .5963355E-03   .4486760E-03   .3017856E-03   .7998430E-04  -.2157005E-03
  -.6366816E-03  -.1214236E-02  -.1892356E-02  -.2585318E-02  -.3215395E-02
  -.3754106E-02  -.4137958E-02  -.4340587E-02  -.4399453E-02  -.4370497E-02
  -.4262623E-02  -.3995660E-02  -.3501594E-02  -.2692229E-02  -.1613177E-02
  -.4611423E-03   .7146489E-03   .1929842E-02   .3187287E-02   .4572082E-02
   .6061812E-02   .7449577E-02   .8507497E-02   .9181004E-02   .9611037E-02
   .9922010E-02   .1022723E-01   .1051759E-01   .1062987E-01   .1042663E-01
   .9895380E-02   .9173131E-02   .8378240E-02   .7670699E-02   .7129441E-02
   .6647784E-02   .6265819E-02   .6015546E-02   .5827808E-02   .5763841E-02
   .5974732E-02   .6418886E-02   .6820923E-02   .6933763E-02   .6578982E-02
   .5751133E-02   .4718509E-02   .3828776E-02   .3275617E-02   .3058348E-02
   .3026490E-02   .2999891E-02   .2846620E-02   .2563175E-02   .2300679E-02
   .2146341E-02   .2151176E-02   .2293029E-02   .2410363E-02   .2440965E-02
   .2459498E-02   .2475931E-02   .2473129E-02   .2474102E-02   .2437792E-02
   .2356984E-02   .2201505E-02   .1963240E-02   .1698176E-02   .1352607E-02
   .8177709E-03   .1480394E-03  -.5322154E-03  -.1213789E-02  -.1924280E-02
  -.2781197E-02  -.3797090E-02  -.4846747E-02  -.5845986E-02  -.6713378E-02
  -.7427594E-02  -.8038201E-02  -.8502265E-02  -.8717031E-02  -.8717635E-02
  -.8558694E-02  -.8319253E-02  -.8169118E-02  -.8196870E-02  -.8377464E-02
  -.8591788E-02  -.8712132E-02  -.8728071E-02  -.8689875E-02  -.8696751E-02
  -.8775082E-02  -.8875840E-02  -.9046172E-02  -.9275497E-02  -.9554718E-02
  -.9960617E-02  -.1050700E-01  -.1119906E-01  -.1197992E-01  -.1274620E-01
  -.1334918E-01  -.1364449E-01  -.1372849E-01  -.1376178E-01  -.1388330E-01
  -.1409912E-01  -.1426446E-01  -.1427446E-01  -.1411218E-01  -.1382312E-01
  -.1341022E-01  -.1298081E-01  -.1261209E-01  -.1220479E-01  -.1165564E-01
  -.1091114E-01  -.1009344E-01  -.9392852E-02  -.8914822E-02  -.8683193E-02
  -.8612563E-02  -.8555456E-02  -.8357877E-02  -.7999462E-02  -.7573461E-02
  -.7173756E-02  -.6894104E-02  -.6711923E-02  -.6523552E-02  -.6270547E-02
  -.5898522E-02  -.5451528E-02  -.5023097E-02  -.4662397E-02  -.4391483E-02
  -.4195325E-02  -.3996980E-02  -.3719934E-02  -.3405503E-02  -.3081759E-02
  -.2743875E-02  -.2390191E-02  -.2030442E-02  -.1750694E-02  -.1586591E-02
  -.1487078E-02  -.1397246E-02  -.1252091E-02  -.1026433E-02  -.7555802E-03
  -.4935903E-03  -.3506840E-03  -.3475662E-03  -.3323452E-03  -.1846551E-03
   .1607772E-03   .7051226E-03   .1328062E-02   .1875113E-02   .2314848E-02
   .2703980E-02   .3071818E-02   .3410212E-02   .3617118E-02   .3571354E-02
   .3306985E-02   .2941370E-02   .2578375E-02   .2257613E-02   .1859537E-02
   .1272438E-02   .6109281E-03   .9359178E-04  -.2438836E-03  -.4640657E-03
  -.6198754E-03  -.7351569E-03  -.7538518E-03  -.6018198E-03  -.2179493E-03
   .3035303E-03   .8120864E-03   .1267642E-02   .1654109E-02   .1953046E-02
   .2182980E-02   .2384569E-02   .2604981E-02   .2913541E-02   .3275459E-02
   .3553920E-02   .3707817E-02   .3736424E-02   .3642992E-02   .3517299E-02
   .3454981E-02   .3520260E-02   .3684645E-02   .3884242E-02   .4134146E-02
   .4422997E-02   .4753833E-02   .5170300E-02   .5691764E-02   .6277587E-02
   .6845869E-02   .7314678E-02   .7705795E-02   .8070491E-02   .8419266E-02
   .8808500E-02   .9180287E-02   .9448023E-02   .9629272E-02   .9826928E-02
   .1014083E-01   .1052766E-01   .1086237E-01   .1102451E-01   .1092970E-01
   .1064161E-01   .1030695E-01   .1000717E-01   .9778382E-02   .9504469E-02
   .9016620E-02   .8379218E-02   .7704548E-02   .7032152E-02   .6382209E-02
   .5647592E-02   .4755928E-02   .3749597E-02   .2685714E-02   .1686306E-02
   .8477206E-03   .1122236E-03  -.5446233E-03  -.1067497E-02  -.1394353E-02
  -.1528133E-02  -.1599281E-02  -.1588114E-02  -.1480393E-02  -.1333111E-02
  -.1039837E-02  -.5863813E-03   .5266893E-06   .7230616E-03   .1559740E-02
   .2458225E-02   .3321552E-02   .4084626E-02   .4701392E-02   .5303034E-02
   .5936133E-02   .6501912E-02   .6882761E-02   .6910298E-02   .6695912E-02
   .6399721E-02   .6101553E-02   .5944111E-02   .5858468E-02   .5703138E-02
   .5485491E-02   .5225976E-02   .5056130E-02   .5121335E-02   .5311979E-02
   .5499578E-02   .5519399E-02   .5211431E-02   .4745402E-02   .4265105E-02
   .3868933E-02   .3618313E-02   .3424179E-02   .3293406E-02   .3173677E-02
   .3037706E-02   .2935496E-02   .2834200E-02   .2758665E-02   .2794457E-02
   .2940503E-02   .3226505E-02   .3613156E-02   .3940467E-02   .4156789E-02
   .4145047E-02   .3937679E-02   .3712037E-02   .3417513E-02   .3148696E-02
   .2988624E-02   .2775672E-02   .2569086E-02   .2314494E-02   .1950708E-02
   .1709537E-02   .1577344E-02   .1462523E-02   .1304770E-02   .1023765E-02
   .6625865E-03   .3416316E-03   .1525614E-03   .1062272E-03   .1998021E-03
   .3128705E-03   .3346877E-03   .2234731E-03  -.5191893E-05  -.1838481E-03
  -.2237448E-03  -.2221714E-03  -.2458658E-03  -.3582784E-03  -.5150218E-03
  -.5620771E-03  -.5370862E-03  -.3910531E-03  -.1545294E-03   .1790141E-05
   .6747136E-04   .5653744E-04   .3062335E-04   .7293764E-04   .2030102E-03
   .3531608E-03   .4392408E-03   .4710387E-03   .4998674E-03   .5715213E-03
   .7066885E-03   .9233115E-03   .1178609E-02   .1291297E-02   .1076831E-02
   .4825766E-03  -.3602503E-03  -.1308597E-02  -.2208468E-02  -.2908238E-02
  -.3472960E-02  -.3988530E-02  -.4465634E-02  -.4872421E-02  -.5138918E-02
  -.5256439E-02  -.5270657E-02  -.5318060E-02  -.5530691E-02  -.5700743E-02
  -.5640476E-02  -.5418332E-02  -.5002737E-02  -.4481104E-02  -.4044304E-02
  -.3800080E-02  -.3708260E-02  -.3641345E-02  -.3464730E-02  -.3112305E-02
  -.2689380E-02  -.2229882E-02  -.1794301E-02  -.1447187E-02  -.1124243E-02
  -.8156326E-03  -.5532261E-03  -.3173227E-03  -.5584821E-04   .2261694E-03
   .5304259E-03   .9215679E-03   .1375668E-02   .1736875E-02   .1873298E-02
   .1877190E-02   .1889388E-02   .1859825E-02   .1747140E-02   .1595299E-02
   .1332813E-02   .9244706E-03   .4560918E-03  -.5446996E-05  -.3152922E-03
  -.3908458E-03  -.3087665E-03  -.1672882E-03  -.5917684E-04  -.7688330E-05
   .1239393E-03   .4356848E-03   .9338174E-03   .1540799E-02   .2003308E-02
   .2226585E-02   .2289515E-02   .2260704E-02   .2242991E-02   .2243457E-02
   .2275117E-02   .2346112E-02   .2410752E-02   .2424022E-02   .2245032E-02
   .1882837E-02   .1622673E-02   .1632581E-02   .1809375E-02   .1961801E-02
   .1876332E-02   .1511943E-02   .9624732E-03   .3079451E-03  -.4225651E-03
  -.1186452E-02  -.1908128E-02  -.2697027E-02  -.3614848E-02  -.4588988E-02
  -.5510867E-02  -.6196300E-02  -.6594704E-02  -.6846195E-02  -.7137985E-02
  -.7492470E-02  -.7812705E-02  -.7977669E-02  -.7894529E-02  -.7661982E-02
  -.7366738E-02  -.7045128E-02  -.6791890E-02  -.6589148E-02  -.6280004E-02
  -.5835681E-02  -.5343962E-02  -.4930252E-02  -.4742516E-02  -.4603210E-02
  -.4307921E-02  -.3804735E-02  -.2995898E-02  -.1897670E-02  -.6996204E-03
   .3628699E-03   .1067894E-02   .1249892E-02   .9757915E-03   .4395157E-03
  -.8978032E-04  -.4247823E-03  -.6412118E-03  -.9178447E-03  -.1386347E-02
  -.1932624E-02  -.2302057E-02  -.2401887E-02  -.2236422E-02  -.1915141E-02
  -.1756475E-02  -.1963296E-02  -.2440634E-02  -.3004570E-02  -.3354816E-02
  -.3313930E-02  -.3010363E-02  -.2679642E-02  -.2527640E-02  -.2617830E-02
  -.2842900E-02  -.2929134E-02  -.2757012E-02  -.2469587E-02  -.2177217E-02
  -.1957636E-02  -.1901149E-02  -.1957308E-02  -.2005955E-02  -.1983606E-02
  -.1866376E-02  -.1660686E-02  -.1387950E-02  -.1094341E-02  -.8402050E-03
  -.6014929E-03  -.2904436E-03   .1506761E-03   .7549268E-03   .1411890E-02
   .1952366E-02   .2313435E-02   .2513560E-02   .2685311E-02   .2927316E-02
   .3155487E-02   .3250725E-02   .3218190E-02   .3149074E-02   .3075563E-02
   .3048967E-02   .3063043E-02   .2994811E-02   .2801901E-02   .2507617E-02
   .2261000E-02   .2165599E-02   .2160711E-02   .2211631E-02   .2266837E-02
   .2210691E-02   .1999595E-02   .1786337E-02   .1674432E-02   .1637377E-02
   .1714621E-02   .1846678E-02   .1983446E-02   .2125157E-02   .2214851E-02
   .2317838E-02   .2492164E-02   .2738059E-02   .3019719E-02   .3232519E-02
   .3361681E-02   .3459966E-02   .3634268E-02   .3986931E-02   .4479609E-02
   .5062770E-02   .5584697E-02   .6010558E-02   .6494402E-02   .7061697E-02
   .7682434E-02   .8360208E-02   .9078979E-02   .9723530E-02   .1027011E-01
   .1066684E-01   .1085314E-01   .1094523E-01   .1100607E-01   .1102481E-01
   .1102813E-01   .1103006E-01   .1097743E-01   .1082820E-01   .1055330E-01
   .1020508E-01   .9832818E-02   .9437687E-02   .9060379E-02   .8691411E-02
   .8345912E-02   .8039506E-02   .7737600E-02   .7399007E-02   .7023986E-02
   .6671630E-02   .6408909E-02   .6239592E-02   .6123043E-02   .6067845E-02
   .5998183E-02   .5815174E-02   .5556116E-02   .5264830E-02   .4997619E-02
   .4758036E-02   .4445328E-02   .4038472E-02   .3639927E-02   .3331498E-02
   .3107436E-02   .2918909E-02   .2715763E-02   .2484211E-02   .2272687E-02
   .2147276E-02   .2124985E-02   .2160681E-02   .2159565E-02   .2112670E-02
   .2085920E-02   .2042674E-02   .1926582E-02   .1708837E-02   .1352054E-02
   .9568143E-03   .6586294E-03   .4456854E-03   .1917089E-03  -.2016287E-03
  -.7893892E-03  -.1500758E-02  -.2132760E-02  -.2653361E-02  -.3084427E-02
  -.3428903E-02  -.3725022E-02  -.3959498E-02  -.4193645E-02  -.4428924E-02
  -.4622714E-02  -.4848438E-02  -.5079331E-02  -.5266452E-02  -.5498259E-02
  -.5766202E-02  -.6046332E-02  -.6359962E-02  -.6613976E-02  -.6769355E-02
  -.6861311E-02  -.6998022E-02  -.7295385E-02  -.7742774E-02  -.8297344E-02
  -.8872459E-02  -.9427715E-02  -.9988415E-02  -.1045207E-01  -.1072569E-01
  -.1080939E-01  -.1080465E-01  -.1083297E-01  -.1091807E-01  -.1107125E-01
  -.1116847E-01  -.1101131E-01  -.1061025E-01  -.1007055E-01  -.9436458E-02
  -.8852129E-02  -.8396172E-02  -.8017174E-02  -.7660052E-02  -.7281380E-02
  -.6855748E-02  -.6399179E-02  -.6020728E-02  -.5760146E-02  -.5629255E-02
  -.5576703E-02  -.5467173E-02  -.5269965E-02  -.5027288E-02  -.4848364E-02
  -.4907518E-02  -.5171605E-02  -.5439305E-02  -.5566558E-02  -.5436742E-02
  -.5063421E-02  -.4553380E-02  -.4075043E-02  -.3771735E-02  -.3637323E-02
  -.3608314E-02  -.3530087E-02  -.3340256E-02  -.3126839E-02  -.2966360E-02
  -.2892410E-02  -.2934255E-02  -.3097100E-02  -.3270088E-02  -.3373415E-02
  -.3381947E-02  -.3271108E-02  -.3000130E-02  -.2585034E-02  -.2094031E-02
  -.1545994E-02  -.9938137E-03  -.4920033E-03  -.6082173E-04   .3565938E-03
   .7876163E-03   .1233733E-02   .1738180E-02   .2212276E-02   .2534876E-02
   .2705073E-02   .2723453E-02   .2571631E-02   .2328206E-02   .2059198E-02
   .1763803E-02   .1465983E-02   .1125362E-02   .6581968E-03   .1321680E-03
  -.2715569E-03  -.4914647E-03  -.5632365E-03  -.5219600E-03  -.4397773E-03
  -.3858909E-03  -.3679440E-03  -.2732213E-03  -.1604593E-04   .3428110E-03
   .7075131E-03   .9726486E-03   .1065374E-02   .9672472E-03   .6600282E-03
   .2489902E-03  -.1673289E-03  -.5488081E-03  -.7840950E-03  -.8894088E-03
  -.9789196E-03  -.1142298E-02  -.1389527E-02  -.1686456E-02  -.2013236E-02
  -.2296398E-02  -.2514212E-02  -.2706441E-02  -.2909249E-02  -.3129250E-02
  -.3300271E-02  -.3415701E-02  -.3458147E-02  -.3393863E-02  -.3279770E-02
  -.3151593E-02  -.3063843E-02  -.3034318E-02  -.2992885E-02  -.2876770E-02
  -.2643311E-02  -.2330593E-02  -.2020911E-02  -.1826777E-02  -.1823237E-02
  -.1903737E-02  -.1932017E-02  -.1887945E-02  -.1834792E-02  -.1835502E-02
  -.1939830E-02  -.2119741E-02  -.2251689E-02  -.2270197E-02  -.2282685E-02
  -.2366052E-02  -.2393245E-02  -.2214974E-02  -.1743469E-02  -.1010388E-02
  -.1828803E-03   .5207168E-03   .1012413E-02   .1330008E-02   .1493723E-02
   .1565591E-02   .1627195E-02   .1680021E-02   .1667339E-02   .1543234E-02
   .1236016E-02   .7663071E-03   .3170658E-03   .9932272E-04   .2407031E-03
   .6622972E-03   .1218889E-02   .1763809E-02   .2142529E-02   .2358637E-02
   .2517715E-02   .2722771E-02   .3016564E-02   .3337250E-02   .3600869E-02
   .3757446E-02   .3851250E-02   .3938392E-02   .3982605E-02   .3953293E-02
   .3832045E-02   .3658647E-02   .3490926E-02   .3376793E-02   .3326378E-02
   .3256546E-02   .3155423E-02   .3045306E-02   .2979262E-02   .3049215E-02
   .3178343E-02   .3239744E-02   .3212507E-02   .3158155E-02   .3178375E-02
   .3256155E-02   .3282790E-02   .3245081E-02   .3228906E-02   .3257654E-02
   .3246275E-02   .3108375E-02   .2827339E-02   .2496101E-02   .2263758E-02
   .2170538E-02   .2135150E-02   .2050232E-02   .1872927E-02   .1673856E-02
   .1573583E-02   .1613713E-02   .1741606E-02   .1941208E-02   .2188479E-02
   .2393642E-02   .2506153E-02   .2506322E-02   .2391554E-02   .2244349E-02
   .2119669E-02   .2023719E-02   .1971056E-02   .1928613E-02   .1850887E-02
   .1764953E-02   .1749864E-02   .1808441E-02   .1900880E-02   .1979813E-02
   .1952507E-02   .1811682E-02   .1654586E-02   .1558690E-02   .1558961E-02
   .1636761E-02   .1744749E-02   .1791777E-02   .1710248E-02   .1527407E-02
   .1303153E-02   .1123325E-02   .1005478E-02   .9303403E-03   .8836082E-03
   .7911784E-03   .5764671E-03   .1510130E-03  -.5322579E-03  -.1351703E-02
  -.2183577E-02  -.2969249E-02  -.3654297E-02  -.4283542E-02  -.4900992E-02
  -.5500088E-02  -.6072928E-02  -.6601040E-02  -.7062882E-02  -.7377331E-02
  -.7515160E-02  -.7523493E-02  -.7423645E-02  -.7274668E-02  -.7098751E-02
  -.6841253E-02  -.6477278E-02  -.6029973E-02  -.5515560E-02  -.4946672E-02
  -.4298936E-02  -.3555690E-02  -.2776486E-02  -.1998879E-02  -.1240711E-02
  -.5318187E-03   .6105843E-04   .4974733E-03   .7659861E-03   .8909744E-03
   .9374819E-03   .8964221E-03   .7816378E-03   .6205369E-03   .4215936E-03
   .2298251E-03   .4250707E-04  -.1688163E-03  -.4068940E-03  -.6473102E-03
  -.8232740E-03  -.9054236E-03  -.9002853E-03  -.8034770E-03  -.6834153E-03
  -.6067022E-03  -.5865335E-03  -.6130242E-03  -.5983811E-03  -.4794126E-03
  -.2606447E-03   .4082171E-04   .3932362E-03   .7585254E-03   .1122757E-02
   .1480183E-02   .1827640E-02   .2241117E-02   .2750955E-02   .3269205E-02
   .3686646E-02   .3925653E-02   .4011729E-02   .4051541E-02   .4136382E-02
   .4247685E-02   .4308226E-02   .4278142E-02   .4179319E-02   .4089227E-02
   .4041361E-02   .4041843E-02   .4118674E-02   .4294560E-02   .4570017E-02
   .4866519E-02   .5046029E-02   .5052515E-02   .4962971E-02   .4871490E-02
   .4863052E-02   .4928123E-02   .5001862E-02   .5105451E-02   .5263512E-02
   .5508606E-02   .5845023E-02   .6225460E-02   .6613423E-02   .6961916E-02
   .7228847E-02   .7423888E-02   .7603268E-02   .7813386E-02   .8085765E-02
   .8449876E-02   .8873066E-02   .9286721E-02   .9673154E-02   .1003163E-01
   .1030456E-01   .1043692E-01   .1046070E-01   .1044238E-01   .1043120E-01
   .1044386E-01   .1044305E-01   .1035125E-01   .1012782E-01   .9788489E-02
   .9341813E-02   .8777791E-02   .8120978E-02   .7430487E-02   .6750775E-02
   .6105589E-02   .5459968E-02   .4763965E-02   .4048870E-02   .3413937E-02
   .2950262E-02   .2728524E-02   .2786909E-02   .3032863E-02   .3260210E-02
   .3322208E-02   .3214949E-02   .3044954E-02   .2962850E-02   .3001745E-02
   .3054606E-02   .3016344E-02   .2852683E-02   .2627902E-02   .2392416E-02
   .2132344E-02   .1811215E-02   .1384880E-02   .8562268E-03   .2445191E-03
  -.4200307E-03  -.1086865E-02  -.1685884E-02  -.2151438E-02  -.2492854E-02
  -.2793855E-02  -.3128225E-02  -.3521693E-02  -.3930135E-02  -.4259395E-02
  -.4461943E-02  -.4584255E-02  -.4708233E-02  -.4888250E-02  -.5136460E-02
  -.5435534E-02  -.5748179E-02  -.6038178E-02  -.6309848E-02  -.6540113E-02
  -.6736566E-02  -.6933487E-02  -.7115399E-02  -.7311895E-02  -.7556367E-02
  -.7829071E-02  -.8077315E-02  -.8239988E-02  -.8275919E-02  -.8183350E-02
  -.7968204E-02  -.7606996E-02  -.7126338E-02  -.6587872E-02  -.6107130E-02
  -.5847539E-02  -.5840808E-02  -.6000698E-02  -.6195525E-02  -.6332389E-02
  -.6403728E-02  -.6440887E-02  -.6495591E-02  -.6567719E-02  -.6598289E-02
  -.6520391E-02  -.6313375E-02  -.6025518E-02  -.5737559E-02  -.5527293E-02
  -.5445686E-02  -.5470200E-02  -.5503068E-02  -.5469511E-02  -.5374094E-02
  -.5226624E-02  -.5029726E-02  -.4844995E-02  -.4750437E-02  -.4740205E-02
  -.4760669E-02  -.4771800E-02  -.4734377E-02  -.4638688E-02  -.4540723E-02
  -.4504516E-02  -.4523968E-02  -.4559958E-02  -.4580019E-02  -.4568551E-02
  -.4513827E-02  -.4452858E-02  -.4414286E-02  -.4396168E-02  -.4414337E-02
  -.4445132E-02  -.4498693E-02  -.4605486E-02  -.4749258E-02  -.4915276E-02
  -.5126286E-02  -.5410362E-02  -.5716224E-02  -.5973330E-02  -.6166775E-02
  -.6280282E-02  -.6318387E-02  -.6316842E-02  -.6311160E-02  -.6310480E-02
  -.6309833E-02  -.6260352E-02  -.6098292E-02  -.5848853E-02  -.5543934E-02
  -.5244853E-02  -.5054415E-02  -.4974080E-02  -.4944831E-02  -.4893411E-02
  -.4761784E-02  -.4631958E-02  -.4584701E-02  -.4593808E-02  -.4643625E-02
  -.4689085E-02  -.4713263E-02  -.4775513E-02  -.4867970E-02  -.4976970E-02
  -.5082950E-02  -.5131085E-02  -.5109477E-02  -.5001888E-02  -.4844176E-02
  -.4699094E-02  -.4593433E-02  -.4573570E-02  -.4611865E-02  -.4661442E-02
  -.4722988E-02  -.4727279E-02  -.4662144E-02  -.4573220E-02  -.4488241E-02
  -.4413277E-02  -.4298748E-02  -.4155517E-02  -.3968700E-02  -.3708427E-02
  -.3399276E-02  -.3051925E-02  -.2714300E-02  -.2351361E-02  -.1935616E-02
  -.1549954E-02  -.1232238E-02  -.1006374E-02  -.8130566E-03  -.5991225E-03
  -.3705053E-03  -.2609530E-04   .4303665E-03   .9163573E-03   .1418429E-02
   .1872411E-02   .2288398E-02   .2773479E-02   .3411483E-02   .4121090E-02
   .4665929E-02   .5019030E-02   .5284848E-02   .5538137E-02   .5862393E-02
   .6245052E-02   .6555699E-02   .6656240E-02   .6637098E-02   .6565437E-02
   .6436150E-02   .6337454E-02   .6233402E-02   .6119426E-02   .6025057E-02
   .5924924E-02   .5797496E-02   .5560380E-02   .5194369E-02   .4789174E-02
   .4361908E-02   .3869484E-02   .3285729E-02   .2600971E-02   .1911190E-02
   .1308625E-02   .7884265E-03   .3368030E-03  -.5758576E-04  -.4330277E-03
  -.7891756E-03  -.1077685E-02  -.1254402E-02  -.1326748E-02  -.1358083E-02
  -.1400208E-02  -.1496771E-02  -.1623351E-02  -.1714742E-02  -.1697532E-02
  -.1525940E-02  -.1239229E-02  -.8975618E-03  -.5261621E-03  -.1748566E-03
   .1432713E-03   .4663015E-03   .7914441E-03   .1153691E-02   .1512421E-02
   .1807393E-02   .2088116E-02   .2378683E-02   .2680630E-02   .2981032E-02
   .3238607E-02   .3408058E-02   .3466610E-02   .3463826E-02   .3432345E-02
   .3357995E-02   .3258110E-02   .3092139E-02   .2767703E-02   .2339583E-02
   .1969632E-02   .1763472E-02   .1702830E-02   .1632018E-02   .1369009E-02
   .8833096E-03   .3262449E-03  -.6520268E-04  -.1270364E-03   .9085758E-04
   .3942457E-03   .6601545E-03   .8601084E-03   .9757459E-03   .1079242E-02
   .1229442E-02   .1434525E-02   .1663005E-02   .1819066E-02   .1871261E-02
   .1814568E-02   .1733273E-02   .1713729E-02   .1761898E-02   .1823144E-02
   .1788849E-02   .1705231E-02   .1636144E-02   .1624704E-02   .1692398E-02
   .1775619E-02   .1870842E-02   .1995513E-02   .2127887E-02   .2253116E-02
   .2404915E-02   .2622843E-02   .2895559E-02   .3161844E-02   .3357713E-02
   .3434938E-02   .3368604E-02   .3161993E-02   .2834152E-02   .2401915E-02
   .1881522E-02   .1361396E-02   .9382610E-03   .6393005E-03   .4196676E-03
   .1749196E-03  -.1404104E-03  -.5114149E-03  -.8754660E-03  -.1153841E-02
  -.1372047E-02  -.1584231E-02  -.1777455E-02  -.1919652E-02  -.1974969E-02
  -.1922699E-02  -.1824665E-02  -.1719227E-02  -.1613864E-02  -.1542045E-02
  -.1467078E-02  -.1369066E-02  -.1236935E-02  -.1010640E-02  -.6666038E-03
  -.2535451E-03   .1208876E-03   .4145360E-03   .6242484E-03   .7619699E-03
   .9127697E-03   .1120728E-02   .1398665E-02   .1696587E-02   .1923234E-02
   .2089928E-02   .2235148E-02   .2386824E-02   .2558519E-02   .2715903E-02
   .2795938E-02   .2733652E-02   .2561226E-02   .2351383E-02   .2123689E-02
   .1869798E-02   .1493814E-02   .9848160E-03   .4608452E-03  -.4739655E-06
  -.3418241E-03  -.6087194E-03  -.9045907E-03  -.1253468E-02  -.1611857E-02
  -.1947749E-02  -.2227737E-02  -.2387238E-02  -.2427084E-02  -.2392834E-02
  -.2320411E-02  -.2234512E-02  -.2124944E-02  -.1985823E-02  -.1838191E-02
  -.1677445E-02  -.1519376E-02  -.1390330E-02  -.1273665E-02  -.1161118E-02
  -.1062111E-02  -.9678565E-03  -.8521319E-03  -.7165720E-03  -.6048047E-03
  -.5561243E-03  -.5894364E-03  -.6804883E-03  -.7763793E-03  -.8561439E-03
  -.9432408E-03  -.1023454E-02  -.1041606E-02  -.9923099E-03  -.8551266E-03
  -.6113733E-03  -.2812627E-03   .1127077E-03   .5189802E-03   .8748274E-03
   .1168651E-02   .1416050E-02   .1648811E-02   .1904581E-02   .2154820E-02
   .2297520E-02   .2223600E-02   .1928737E-02   .1539931E-02   .1206184E-02
   .9672686E-03   .7728113E-03   .5892446E-03   .3829956E-03   .1351666E-03
  -.7110059E-04  -.1696060E-03  -.1951247E-03  -.1951725E-03  -.2302677E-03
  -.3613946E-03  -.5532650E-03  -.7569762E-03  -.9264604E-03  -.9711480E-03
  -.9056752E-03  -.8109706E-03  -.7258538E-03  -.6309899E-03  -.4998517E-03
  -.3726396E-03  -.2547878E-03  -.1117039E-03   .7734577E-04   .3319403E-03
   .6060598E-03   .8748221E-03   .1158390E-02   .1416573E-02   .1562820E-02
   .1554073E-02   .1444426E-02   .1311510E-02   .1187583E-02   .1065355E-02
   .9460499E-03   .8231345E-03   .7059211E-03   .6127930E-03   .4977746E-03
   .3077358E-03   .8814381E-04  -.7773567E-04  -.2003390E-03  -.3315177E-03
  -.5176326E-03  -.8014584E-03  -.1176949E-02  -.1604118E-02  -.2040694E-02
  -.2412174E-02  -.2671723E-02  -.2863816E-02  -.3050265E-02  -.3213432E-02
  -.3315489E-02  -.3342780E-02  -.3277287E-02  -.3134810E-02  -.2938623E-02
  -.2698566E-02  -.2419077E-02  -.2103737E-02  -.1762875E-02  -.1430894E-02
  -.1140095E-02  -.8818618E-03  -.6246530E-03  -.3540676E-03  -.1198373E-03
  -.1976569E-04  -.6188135E-04  -.1549936E-03  -.2274629E-03  -.2542466E-03
  -.2689613E-03  -.3107630E-03  -.3890404E-03  -.4870846E-03  -.5870084E-03
  -.6559354E-03  -.6992348E-03  -.8149478E-03  -.1028515E-02  -.1309043E-02
  -.1599969E-02  -.1807918E-02  -.1885703E-02  -.1894050E-02  -.1936224E-02
  -.2064950E-02  -.2259387E-02  -.2443174E-02  -.2618838E-02  -.2765406E-02
  -.2825190E-02  -.2846367E-02  -.2878399E-02  -.2922984E-02  -.2984426E-02
  -.3028330E-02  -.2984652E-02  -.2812354E-02  -.2479612E-02  -.2014932E-02
  -.1526909E-02  -.1134327E-02  -.9310289E-03  -.8901688E-03  -.9037857E-03
  -.8805285E-03  -.7211568E-03  -.4482670E-03  -.2061932E-03  -.6225542E-04
  -.2926772E-04  -.5054494E-04  -.4736054E-04  -.1090751E-04  -.7894665E-06
  -.1063263E-03  -.3468424E-03  -.6812677E-03  -.9873643E-03  -.1157476E-02
  -.1245789E-02  -.1343422E-02  -.1447717E-02  -.1536599E-02  -.1585512E-02
  -.1554541E-02  -.1451627E-02  -.1362970E-02  -.1384188E-02  -.1502015E-02
  -.1666157E-02  -.1806481E-02  -.1819063E-02  -.1709781E-02  -.1629851E-02
  -.1649777E-02  -.1701582E-02  -.1704086E-02  -.1586888E-02  -.1369277E-02
  -.1105117E-02  -.8566988E-03  -.6216532E-03  -.3332076E-03  -.2666082E-04
   .2708197E-03   .5802942E-03   .8298965E-03   .9679504E-03   .1037892E-02
   .1091496E-02   .1209212E-02   .1420879E-02   .1640712E-02   .1821819E-02
   .2006539E-02   .2242278E-02   .2588864E-02   .3011123E-02   .3415607E-02
   .3787121E-02   .4081889E-02   .4286088E-02   .4424757E-02   .4553930E-02
   .4753511E-02   .5045957E-02   .5459413E-02   .5898923E-02   .6272386E-02
   .6571060E-02   .6751865E-02   .6892699E-02   .7110718E-02   .7399224E-02
   .7684649E-02   .7870059E-02   .7933632E-02   .8027523E-02   .8184090E-02
   .8297312E-02   .8315689E-02   .8183418E-02   .7971295E-02   .7755444E-02
   .7528707E-02   .7328333E-02   .7111166E-02   .6815095E-02   .6510401E-02
   .6268474E-02   .6112353E-02   .6007879E-02   .5869273E-02   .5722637E-02
   .5651634E-02   .5638277E-02   .5581715E-02   .5448025E-02   .5329237E-02
   .5295090E-02   .5306696E-02   .5331670E-02   .5417639E-02   .5554011E-02
   .5658156E-02   .5676249E-02   .5607159E-02   .5526950E-02   .5520020E-02
   .5634406E-02   .5909398E-02   .6268455E-02   .6434327E-02   .6265265E-02
   .5803498E-02   .5122189E-02   .4463984E-02   .4035005E-02   .3848754E-02
   .3813763E-02   .3848782E-02   .3910609E-02   .3955905E-02   .3936784E-02
   .3860788E-02   .3807184E-02   .3789689E-02   .3721102E-02   .3546830E-02
   .3364843E-02   .3174854E-02   .2806320E-02   .2272972E-02   .1726102E-02
   .1276976E-02   .1039477E-02   .9719586E-03   .9186836E-03   .8057127E-03
   .6389135E-03   .4672940E-03   .3160634E-03   .1688894E-03  -.1954265E-05
  -.2167774E-03  -.4848436E-03  -.7498213E-03  -.9959152E-03  -.1352329E-02
  -.1858078E-02  -.2401383E-02  -.2906428E-02  -.3334715E-02  -.3639930E-02
  -.3874421E-02  -.4075261E-02  -.4229458E-02  -.4364545E-02  -.4467830E-02
  -.4581997E-02  -.4689426E-02  -.4745682E-02  -.4764451E-02  -.4691964E-02
  -.4576778E-02  -.4452132E-02  -.4311675E-02  -.4246942E-02  -.4262621E-02
  -.4301265E-02  -.4362996E-02  -.4397384E-02  -.4315767E-02  -.4190629E-02
  -.4087300E-02  -.4072977E-02  -.4213461E-02  -.4317906E-02  -.4266657E-02
  -.4066960E-02  -.3729755E-02  -.3307224E-02  -.2830755E-02  -.2408822E-02
  -.2069634E-02  -.1724109E-02  -.1357531E-02  -.9729571E-03  -.5913096E-03
  -.2309541E-03   .1361153E-03   .4681327E-03   .6951333E-03   .7706797E-03
   .6962879E-03   .5338421E-03   .3498126E-03   .2201879E-03   .6652688E-04
  -.2028933E-03  -.5856443E-03  -.1086118E-02  -.1554208E-02  -.1888535E-02
  -.2073089E-02  -.2081683E-02  -.1984218E-02  -.1846570E-02  -.1772765E-02
  -.1825587E-02  -.1895806E-02  -.1891970E-02  -.1807034E-02  -.1668949E-02
  -.1602565E-02  -.1671726E-02  -.1839392E-02  -.2028611E-02  -.2149143E-02
  -.2230528E-02  -.2280301E-02  -.2331242E-02  -.2465255E-02  -.2609749E-02
  -.2634667E-02  -.2524262E-02  -.2316354E-02  -.2068332E-02  -.1884303E-02
  -.1783200E-02  -.1693838E-02  -.1500002E-02  -.1168135E-02  -.8064898E-03
  -.4872744E-03  -.2568844E-03  -.1515501E-03  -.7448381E-04   .8550872E-04
   .2979852E-03   .4200188E-03   .2700816E-03  -.1375689E-03  -.6438824E-03
  -.1094723E-02  -.1338715E-02  -.1353687E-02  -.1269904E-02  -.1187146E-02
  -.1117735E-02  -.1101748E-02  -.1111054E-02  -.1096972E-02  -.1165578E-02
  -.1382039E-02  -.1691486E-02  -.2020941E-02  -.2266311E-02  -.2330644E-02
  -.2244486E-02  -.2143259E-02  -.2133649E-02  -.2301903E-02  -.2569151E-02
  -.2755492E-02  -.2787058E-02  -.2706891E-02  -.2702867E-02  -.2864347E-02
  -.3105697E-02  -.3339329E-02  -.3446629E-02  -.3410123E-02  -.3368107E-02
  -.3497319E-02  -.3858254E-02  -.4320286E-02  -.4724212E-02  -.4964601E-02
  -.5011521E-02  -.4930952E-02  -.4842436E-02  -.4862344E-02  -.5016215E-02
  -.5186904E-02  -.5243603E-02  -.5188918E-02  -.5160239E-02  -.5270119E-02
  -.5508353E-02  -.5766245E-02  -.5934853E-02  -.5998421E-02  -.6026070E-02
  -.6119057E-02  -.6353054E-02  -.6657120E-02  -.6860953E-02  -.6901630E-02
  -.6775682E-02  -.6574410E-02  -.6443891E-02  -.6419488E-02  -.6436308E-02
  -.6379935E-02  -.6208451E-02  -.5979243E-02  -.5759259E-02  -.5626335E-02
  -.5633900E-02  -.5709180E-02  -.5705516E-02  -.5519239E-02  -.5154368E-02
  -.4659927E-02  -.4157850E-02  -.3783935E-02  -.3505012E-02  -.3258566E-02
  -.3010349E-02  -.2698527E-02  -.2357712E-02  -.2024724E-02  -.1676243E-02
  -.1315100E-02  -.8485006E-03  -.2608143E-03   .3323546E-03   .8595005E-03
   .1295848E-02   .1674550E-02   .2066795E-02   .2486414E-02   .2823823E-02
   .3031292E-02   .3122696E-02   .3150186E-02   .3209056E-02   .3328209E-02
   .3483853E-02   .3648277E-02   .3731605E-02   .3576006E-02   .3221437E-02
   .2869523E-02   .2635701E-02   .2543508E-02   .2543268E-02   .2549519E-02
   .2500865E-02   .2409361E-02   .2337701E-02   .2325740E-02   .2368117E-02
   .2444921E-02   .2530249E-02   .2581820E-02   .2576802E-02   .2528877E-02
   .2540807E-02   .2631188E-02   .2691883E-02   .2680627E-02   .2591819E-02
   .2472167E-02   .2446094E-02   .2590625E-02   .2830924E-02   .3044176E-02
   .3178020E-02   .3228780E-02   .3316714E-02   .3531957E-02   .3828729E-02
   .4126456E-02   .4279280E-02   .4224256E-02   .4029885E-02   .3847305E-02
   .3782331E-02   .3764307E-02   .3694956E-02   .3531668E-02   .3310374E-02
   .3139916E-02   .3076450E-02   .3117059E-02   .3220491E-02   .3333722E-02
   .3374773E-02   .3289018E-02   .3144883E-02   .3018577E-02   .2959642E-02
   .2946767E-02   .2933720E-02   .2918971E-02   .2886891E-02   .2794488E-02
   .2624216E-02   .2431052E-02   .2226600E-02   .2025442E-02   .1835282E-02
   .1572481E-02   .1212491E-02   .7439041E-03   .1871325E-03  -.3765725E-03
  -.8744929E-03  -.1215885E-02  -.1400692E-02  -.1532084E-02  -.1629988E-02
  -.1709276E-02  -.1790016E-02  -.1808560E-02  -.1745654E-02  -.1613620E-02
  -.1422279E-02  -.1173363E-02  -.9379374E-03  -.7719136E-03  -.6206669E-03
  -.4738146E-03  -.3473499E-03  -.2286969E-03  -.9384137E-04   .7604887E-04
   .3247097E-03   .6743476E-03   .1014344E-02   .1226703E-02   .1298891E-02
   .1281053E-02   .1270137E-02   .1334003E-02   .1431443E-02   .1530079E-02
   .1636812E-02   .1704480E-02   .1707118E-02   .1731673E-02   .1852451E-02
   .2036895E-02   .2273640E-02   .2530163E-02   .2653084E-02   .2662389E-02
   .2689481E-02   .2730478E-02   .2803411E-02   .2876106E-02   .2910167E-02
   .2945478E-02   .2998985E-02   .3110513E-02   .3321048E-02   .3580443E-02
   .3828562E-02   .4030185E-02   .4137310E-02   .4148841E-02   .4127090E-02
   .4125541E-02   .4161409E-02   .4240973E-02   .4294716E-02   .4268610E-02
   .4222370E-02   .4136769E-02   .4003104E-02   .3884393E-02   .3743165E-02
   .3592081E-02   .3485726E-02   .3401172E-02   .3322137E-02   .3267069E-02
   .3160458E-02   .2950155E-02   .2732066E-02   .2492140E-02   .2214608E-02
   .1944656E-02   .1660988E-02   .1367033E-02   .1082365E-02   .8184230E-03
   .6115413E-03   .4931501E-03   .4171890E-03   .3058345E-03   .8190788E-04
  -.1910112E-03  -.4074441E-03  -.5533973E-03  -.5774614E-03  -.5102152E-03
  -.4840334E-03  -.5464768E-03  -.6455766E-03  -.7125592E-03  -.6633522E-03
  -.4788099E-03  -.1876890E-03   .1390690E-03   .3924407E-03   .5813502E-03
   .7425359E-03   .9185082E-03   .1110937E-02   .1224832E-02   .1253979E-02
   .1229360E-02   .1167226E-02   .1112681E-02   .1094002E-02   .1090263E-02
   .1021119E-02   .8613803E-03   .6603071E-03   .4685133E-03   .3975856E-03
   .4586544E-03   .5082559E-03   .4679082E-03   .3002112E-03   .3346768E-04
  -.1866710E-03  -.2804197E-03  -.2898576E-03  -.2581048E-03  -.2536277E-03
  -.3199359E-03  -.4425481E-03  -.5772051E-03  -.6800498E-03  -.7921965E-03
  -.9489660E-03  -.1166764E-02  -.1420565E-02  -.1600574E-02  -.1618841E-02
  -.1537875E-02  -.1429334E-02  -.1325173E-02  -.1284121E-02  -.1218902E-02
  -.1027722E-02  -.7374743E-03  -.4012878E-03  -.6025157E-04   .2005813E-03
   .3872161E-03   .5289784E-03   .5955666E-03   .6986255E-03   .8957475E-03
   .1157050E-02   .1407432E-02   .1560994E-02   .1592495E-02   .1579842E-02
   .1569786E-02   .1463653E-02   .1333571E-02   .1200798E-02   .1026679E-02
   .9577555E-03   .1008498E-02   .1085285E-02   .1168171E-02   .1174969E-02
   .1096563E-02   .1016242E-02   .9740576E-03   .1065346E-02   .1288693E-02
   .1530581E-02   .1615699E-02   .1508089E-02   .1382743E-02   .1314529E-02
   .1370875E-02   .1545982E-02   .1657137E-02   .1626336E-02   .1569214E-02
   .1618588E-02   .1774003E-02   .1911931E-02   .1957899E-02   .1911209E-02
   .1749248E-02   .1517050E-02   .1337579E-02   .1265484E-02   .1268155E-02
   .1290061E-02   .1259816E-02   .1186676E-02   .1133334E-02   .1104003E-02
   .1083611E-02   .1121895E-02   .1157256E-02   .1061765E-02   .9287478E-03
   .7993359E-03   .6842216E-03   .6033108E-03   .4570020E-03   .2230907E-03
  -.6784127E-05  -.1293128E-03  -.1908090E-03  -.2283306E-03  -.2001767E-03
  -.2050494E-03  -.2534792E-03  -.2408289E-03  -.1435746E-03   .2499469E-04
   .2869810E-03   .5891961E-03   .8236001E-03   .1007028E-02   .1150898E-02
   .1298620E-02   .1501539E-02   .1662101E-02   .1715273E-02   .1731344E-02
   .1692563E-02   .1623222E-02   .1585968E-02   .1559882E-02   .1562062E-02
   .1512805E-02   .1372725E-02   .1185579E-02   .9732639E-03   .8558195E-03
   .8750467E-03   .9693367E-03   .1111544E-02   .1179246E-02   .1093284E-02
   .9493909E-03   .8420956E-03   .7954440E-03   .8236437E-03   .8561541E-03
   .7506006E-03   .5053744E-03   .1287688E-03  -.3235497E-03  -.6887659E-03
  -.9175668E-03  -.1054717E-02  -.1169671E-02  -.1295797E-02  -.1429872E-02
  -.1540396E-02  -.1576935E-02  -.1514760E-02  -.1413265E-02  -.1299282E-02
  -.1161065E-02  -.9824988E-03  -.7644313E-03  -.6010290E-03  -.5756997E-03
  -.6908533E-03  -.9346775E-03  -.1188052E-02  -.1204333E-02  -.9741271E-03
  -.6564664E-03  -.5144793E-03  -.7031045E-03  -.1074710E-02  -.1452015E-02
  -.1668888E-02  -.1659641E-02  -.1506905E-02  -.1365637E-02  -.1341615E-02
  -.1420269E-02  -.1510323E-02  -.1436526E-02  -.1134136E-02  -.7720214E-03
  -.5512457E-03  -.5613522E-03  -.6949506E-03  -.7825219E-03  -.7557254E-03
  -.6242205E-03  -.5052809E-03  -.4839059E-03  -.5068629E-03  -.4954492E-03
  -.3674573E-03  -.1331642E-03   .6077271E-04   .1221476E-03   .9043954E-04
   .9113844E-04   .2493948E-03   .6217883E-03   .1178476E-02   .1713260E-02
   .2002526E-02   .2063194E-02   .2048405E-02   .2118216E-02   .2367629E-02
   .2723028E-02   .2988927E-02   .3009094E-02   .2779847E-02   .2450685E-02
   .2220484E-02   .2180747E-02   .2260588E-02   .2337001E-02   .2344091E-02
   .2232642E-02   .2059952E-02   .1936497E-02   .1880950E-02   .1903397E-02
   .1894675E-02   .1755622E-02   .1526772E-02   .1267289E-02   .1049750E-02
   .9265400E-03   .9646291E-03   .1116918E-02   .1201478E-02   .1125776E-02
   .8860457E-03   .5719074E-03   .3206468E-03   .1904549E-03   .1283070E-03
   .6055507E-04   .1447397E-04  -.1127104E-04  -.4425444E-04  -.3558748E-04
   .1265800E-04   .9471993E-04   .2074917E-03   .2979688E-03   .3863559E-03
   .4429357E-03   .4068660E-03   .3421303E-03   .3068951E-03   .2939829E-03
   .3178116E-03   .3553011E-03   .3404488E-03   .2067982E-03  -.9617565E-04
  -.4895001E-03  -.8179098E-03  -.9587317E-03  -.9416086E-03  -.8717037E-03
  -.8456163E-03  -.9411869E-03  -.1150956E-02  -.1423050E-02  -.1677462E-02
  -.1832524E-02  -.1882388E-02  -.1833713E-02  -.1654462E-02  -.1390901E-02
  -.1073816E-02  -.7208876E-03  -.4086601E-03  -.1559104E-03   .6001408E-04
   .3042858E-03   .6270917E-03   .1035902E-02   .1517457E-02   .1913724E-02
   .2122511E-02   .2228164E-02   .2366355E-02   .2609328E-02   .2875602E-02
   .3028562E-02   .3069004E-02   .3037577E-02   .2956597E-02   .2911850E-02
   .2921945E-02   .2970718E-02   .3014916E-02   .2994759E-02   .2877412E-02
   .2701839E-02   .2529689E-02   .2360777E-02   .2217322E-02   .2076898E-02
   .1922039E-02   .1775033E-02   .1640625E-02   .1518132E-02   .1396398E-02
   .1300011E-02   .1198843E-02   .1072768E-02   .9565316E-03   .8935156E-03
   .9752683E-03   .1155959E-02   .1313440E-02   .1413631E-02   .1435165E-02
   .1381910E-02   .1325714E-02   .1294802E-02   .1240072E-02   .8676097E-03
   .6053933E-03   .3484319E-03   .1488434E-03   .1491411E-04  -.7550761E-04
  -.1692453E-03  -.2442565E-03  -.3068292E-03  -.3378154E-03  -.3241260E-03
  -.3082852E-03  -.2731985E-03  -.2195227E-03  -.1612493E-03  -.1625865E-03
  -.2542231E-03  -.3494920E-03  -.3597121E-03  -.2682321E-03  -.1584720E-03
  -.1412126E-03  -.2226765E-03  -.3380363E-03  -.4519621E-03  -.5376293E-03
  -.5619475E-03  -.6140209E-03  -.7794780E-03  -.9453611E-03  -.1057148E-02
  -.1104691E-02  -.1079778E-02  -.1084144E-02  -.1152670E-02  -.1271248E-02
  -.1416467E-02  -.1515766E-02  -.1568502E-02  -.1652300E-02  -.1779630E-02
  -.1949167E-02  -.2184646E-02  -.2379590E-02  -.2459964E-02  -.2474655E-02
  -.2513940E-02  -.2644337E-02  -.2813231E-02  -.2965607E-02  -.3077239E-02
  -.3098622E-02  -.2989757E-02  -.2830172E-02  -.2735324E-02  -.2701993E-02
  -.2682686E-02  -.2655439E-02  -.2634363E-02  -.2678014E-02  -.2852332E-02
  -.3156230E-02  -.3491872E-02  -.3727030E-02  -.3792289E-02  -.3706955E-02
  -.3580053E-02  -.3542727E-02  -.3618237E-02  -.3768017E-02  -.3878260E-02
  -.3878524E-02  -.3923908E-02  -.4106797E-02  -.4416895E-02  -.4764313E-02
  -.4963135E-02  -.4977473E-02  -.4873674E-02  -.4827186E-02  -.4983110E-02
  -.5291449E-02  -.5658056E-02  -.5917679E-02  -.5970655E-02  -.5909509E-02
  -.5833055E-02  -.5788677E-02  -.5834177E-02  -.5898442E-02  -.5842287E-02
  -.5705017E-02  -.5596763E-02  -.5585201E-02  -.5699801E-02  -.5887310E-02
  -.6056064E-02  -.6125935E-02  -.6073836E-02  -.6044682E-02  -.6143231E-02
  -.6319633E-02  -.6559187E-02  -.6840888E-02  -.6996749E-02  -.7011765E-02
  -.7016473E-02  -.6957736E-02  -.6905037E-02  -.6911494E-02  -.6884520E-02
  -.6844248E-02  -.6754477E-02  -.6645976E-02  -.6558283E-02  -.6443723E-02
  -.6336013E-02  -.6248554E-02  -.6166539E-02  -.6021833E-02  -.5807612E-02
  -.5501216E-02  -.5108335E-02  -.4732908E-02  -.4355773E-02  -.4006175E-02
  -.3787108E-02  -.3622228E-02  -.3475110E-02  -.3340087E-02  -.3132508E-02
  -.2925012E-02  -.2768909E-02  -.2710760E-02  -.2751514E-02  -.2795786E-02
  -.2819257E-02  -.2784375E-02  -.2702464E-02  -.2614316E-02  -.2531573E-02
  -.2520769E-02  -.2534410E-02  -.2532136E-02  -.2486964E-02  -.2348165E-02
  -.2192711E-02  -.1965867E-02  -.1722159E-02  -.1592185E-02  -.1470154E-02
  -.1353845E-02  -.1254715E-02  -.1089317E-02  -.8425509E-03  -.5526741E-03
  -.2582448E-03   .5635553E-04   .2858718E-03   .3935713E-03   .4545076E-03
   .4846771E-03   .6026937E-03   .7646695E-03   .8862065E-03   .9961741E-03
   .1081259E-02   .1141177E-02   .1110127E-02   .9399025E-03   .7645211E-03
   .6876311E-03   .6662329E-03   .6965519E-03   .6664926E-03   .5044238E-03
   .2969721E-03   .1248161E-03   .7368871E-04   .1406012E-03   .1987997E-03
   .1532170E-03   .3573969E-04  -.1048095E-03  -.2073013E-03  -.1982076E-03
  -.1761525E-03  -.2134392E-03  -.2467386E-03  -.3406801E-03  -.4790367E-03
  -.6018706E-03  -.6784318E-03  -.6909269E-03  -.6695377E-03  -.6172870E-03
  -.5902978E-03  -.5981996E-03  -.6150988E-03  -.5988379E-03  -.5471168E-03
  -.4357112E-03  -.2678519E-03  -.1120063E-03   .6284517E-04   .2835037E-03
   .5075411E-03   .7220697E-03   .9224116E-03   .1060493E-02   .1166777E-02
   .1266336E-02   .1324779E-02   .1296828E-02   .1191472E-02   .1076043E-02
   .1012636E-02   .1028002E-02   .1105627E-02   .1202665E-02   .1285589E-02
   .1385376E-02   .1484282E-02   .1524865E-02   .1498383E-02   .1479946E-02
   .1559600E-02   .1721921E-02   .1906816E-02   .2009365E-02   .1988588E-02
   .1947967E-02   .1920327E-02   .1948819E-02   .2020702E-02   .2022021E-02
   .1975887E-02   .1928326E-02   .1889558E-02   .1903356E-02   .1965363E-02
   .1990288E-02   .2003289E-02   .2093565E-02   .2265111E-02   .2436853E-02
   .2499245E-02   .2439498E-02   .2295107E-02   .2130846E-02   .2055259E-02
   .2117703E-02   .2228731E-02   .2337391E-02   .2430032E-02   .2390798E-02
   .2228947E-02   .2035336E-02   .1832214E-02   .1666573E-02   .1582517E-02
   .1561886E-02   .1572079E-02   .1582747E-02   .1600967E-02   .1621221E-02
   .1588177E-02   .1523714E-02   .1461606E-02   .1489347E-02   .1638305E-02
   .1810294E-02   .1933610E-02   .1965106E-02   .1944698E-02   .1898661E-02
   .1877634E-02   .1902507E-02   .1927292E-02   .1957172E-02   .1956050E-02
   .1932993E-02   .1881116E-02   .1780868E-02   .1683605E-02   .1606646E-02
   .1548608E-02   .1476728E-02   .1366459E-02   .1239992E-02   .1117324E-02
   .1029493E-02   .9829728E-03   .9109201E-03   .7832381E-03   .6402269E-03
   .4775029E-03   .3526518E-03   .3276122E-03   .3260315E-03   .3184599E-03
   .2603693E-03   .1391035E-03  -.1125331E-04  -.1783189E-03  -.2585271E-03
  -.2436519E-03  -.2268908E-03  -.2454727E-03  -.2820463E-03  -.3111406E-03
  -.3333065E-03  -.3060731E-03  -.2299957E-03  -.1113128E-03   .6664986E-04
   .2763709E-03   .5241363E-03   .7585981E-03   .9463882E-03   .1100810E-02
   .1241290E-02   .1360851E-02   .1425609E-02   .1466063E-02   .1520144E-02
   .1583496E-02   .1635847E-02   .1679278E-02   .1643301E-02   .1563832E-02
   .1528328E-02   .1520900E-02   .1540971E-02   .1549681E-02   .1531784E-02
   .1500526E-02   .1453452E-02   .1344913E-02   .1204251E-02   .1113500E-02
   .1077138E-02   .1082892E-02   .1108574E-02   .1116984E-02   .1060456E-02
   .9371316E-03   .7955672E-03   .6838917E-03   .5985956E-03   .5128098E-03
   .4452423E-03   .3849805E-03   .3446467E-03   .3410743E-03   .2860018E-03
   .2001472E-03   .1175265E-03   .1411961E-04  -.6681645E-04  -.1240437E-03
  -.1494365E-03  -.1503346E-03  -.1705589E-03  -.2072122E-03  -.2599859E-03
  -.2840367E-03  -.2504315E-03  -.2209726E-03  -.1997664E-03  -.2079141E-03
  -.2664557E-03  -.3507188E-03  -.4376466E-03  -.4880506E-03  -.5068397E-03
  -.4876528E-03  -.4448211E-03  -.4506104E-03  -.5611793E-03  -.7424625E-03
  -.9150020E-03  -.1044262E-02  -.1136952E-02  -.1230712E-02  -.1339176E-02
  -.1441478E-02  -.1508638E-02  -.1536889E-02  -.1538678E-02  -.1507855E-02
  -.1471050E-02  -.1466529E-02  -.1513914E-02  -.1603103E-02  -.1657178E-02
  -.1652042E-02  -.1575158E-02  -.1438127E-02  -.1335203E-02  -.1286495E-02
  -.1267231E-02  -.1222089E-02  -.1125726E-02  -.9819641E-03  -.7991080E-03
  -.6180440E-03  -.4574298E-03  -.3344630E-03  -.2578335E-03  -.2292995E-03
  -.2297004E-03  -.2205890E-03  -.1683587E-03  -.7531305E-04   .3965977E-04
   .1603333E-03   .2514877E-03   .3348063E-03   .4723972E-03   .6636842E-03
   .8543377E-03   .9615812E-03   .9258966E-03   .7834691E-03   .6360498E-03
   .5555730E-03   .5507615E-03   .5929273E-03   .5972766E-03   .5036389E-03
   .3311881E-03   .1456774E-03   .2818066E-04   .1254311E-04   .9565578E-04
   .2113525E-03   .2586020E-03   .1958942E-03   .4868978E-04  -.1205801E-03
  -.2266173E-03  -.2124686E-03  -.1238270E-03  -.6894066E-04  -.1092512E-03
  -.2258840E-03  -.3270643E-03  -.3295924E-03  -.2555228E-03  -.1902142E-03
  -.2099749E-03  -.3318967E-03  -.5030504E-03  -.6320587E-03  -.6712651E-03
  -.6154642E-03  -.4610452E-03  -.2444624E-03  -.3611348E-04   .1001393E-03
   .1586140E-03   .1647966E-03   .1594989E-03   .2050182E-03   .3053700E-03
   .4374694E-03   .5697030E-03   .6666884E-03   .7452318E-03   .8168031E-03
   .8753629E-03   .9320813E-03   .9838159E-03   .1021532E-02   .1057075E-02
   .1083814E-02   .1071235E-02   .1004063E-02   .9013341E-03   .7946650E-03
   .7249232E-03   .7155231E-03   .7355571E-03   .7457015E-03   .7176714E-03
   .6352576E-03   .5394134E-03   .4810751E-03   .4628486E-03   .4992770E-03
   .5778069E-03   .6350750E-03   .6167513E-03   .5227677E-03   .4161286E-03
   .3476027E-03   .3378174E-03   .3803967E-03   .4383958E-03   .4788443E-03
   .4922245E-03   .4922156E-03   .4845311E-03   .4840568E-03   .5161492E-03
   .5739576E-03   .6398317E-03   .6907964E-03   .7090023E-03   .7034011E-03
   .6911879E-03   .6954659E-03   .7281608E-03   .7806238E-03   .8335352E-03
   .8615165E-03   .8699020E-03   .8709660E-03   .8579071E-03   .8401476E-03
   .8242711E-03   .8159142E-03   .8221516E-03   .8255800E-03   .8199109E-03
   .8105944E-03   .8005997E-03   .7962630E-03   .8007170E-03   .8034893E-03
   .7972084E-03   .7849320E-03   .7728153E-03   .7639831E-03   .7499275E-03
   .7343134E-03   .7131764E-03   .6848662E-03   .6592938E-03   .6230545E-03
   .5745579E-03   .5335959E-03   .5021208E-03   .4728683E-03   .4505087E-03
   .4349557E-03   .4213526E-03   .4103060E-03   .3973535E-03   .3827823E-03
   .3710959E-03   .3638166E-03   .3604472E-03   .3612701E-03   .3630560E-03
   .3660806E-03   .3704701E-03   .3715104E-03   .3745332E-03   .3707374E-03
   .3583695E-03   .3453517E-03   .3356206E-03   .3339568E-03   .3277774E-03
   .3095207E-03   .2793211E-03   .2510666E-03   .2345548E-03   .2299504E-03
   .2347794E-03   .2371806E-03   .2354348E-03   .2197027E-03   .1955285E-03
   .1791090E-03   .1716587E-03   .1762576E-03   .1918287E-03   .2128330E-03
   .2268655E-03   .2245058E-03   .2096498E-03   .1863967E-03   .1613230E-03
   .1454039E-03   .1393482E-03   .1393114E-03   .1374619E-03   .1285474E-03
   .1156870E-03   .9858308E-04   .8214164E-04   .7204411E-04   .6635166E-04
   .6408844E-04   .6468308E-04   .6520987E-04   .6344692E-04   .6105270E-04
   .6512685E-04   .7510810E-04   .8206804E-04   .8503964E-04   .8604276E-04
   .8685568E-04   .9069177E-04   .1005689E-03   .1162114E-03   .1278909E-03
   .1292751E-03   .1229851E-03   .1131110E-03   .1057981E-03   .1050668E-03
   .1070436E-03   .1105409E-03   .1149483E-03   .1185556E-03   .1248498E-03
   .1314803E-03   .1351833E-03   .1387380E-03   .1438713E-03   .1497212E-03
   .1548239E-03   .1592858E-03   .1641347E-03   .1689173E-03   .1723812E-03
   .1729594E-03   .1701022E-03   .1658236E-03   .1615969E-03   .1567120E-03
   .1509877E-03   .1457246E-03   .1416852E-03   .1397276E-03   .1395183E-03
   .1372305E-03   .1313790E-03   .1232219E-03   .1137188E-03   .1042152E-03
   .9534153E-04   .8782780E-04   .8336709E-04   .8071549E-04   .7609572E-04
   .6857360E-04   .5878284E-04   .4755218E-04   .3679502E-04   .2730300E-04
   .2000749E-04   .1312467E-04   .5039474E-05  -.2512702E-05  -.9658307E-05
  -.1618463E-04  -.2127887E-04  -.2495875E-04  -.2776042E-04  -.2967499E-04
  -.3180067E-04  -.3524405E-04  -.3924754E-04  -.4409156E-04  -.4932910E-04
  -.5372119E-04  -.5651440E-04  -.5734775E-04  -.5778363E-04  -.5930202E-04
  -.6162740E-04  -.6408288E-04  -.6582363E-04  -.6696757E-04  -.6819794E-04
  -.6911544E-04  -.6923291E-04  -.6900126E-04  -.6887429E-04  -.6975919E-04
  -.7188587E-04  -.7442552E-04  -.7701602E-04  -.7890574E-04  -.8005461E-04
  -.8068296E-04  -.8116743E-04  -.8228422E-04  -.8411438E-04  -.8619553E-04
  -.8783956E-04  -.8861788E-04  -.8874562E-04  -.8877639E-04  -.8896035E-04
  -.8949237E-04  -.9002979E-04  -.9021575E-04  -.9042776E-04  -.9089438E-04
  -.9152645E-04  -.9222171E-04  -.9270773E-04  -.9299972E-04  -.9334211E-04
  -.9385360E-04  -.9460164E-04  -.9523624E-04  -.9560893E-04  -.9595111E-04
  -.9611781E-04  -.9621380E-04  -.9648337E-04  -.9676178E-04  -.9715731E-04
  -.9746399E-04  -.9751114E-04  -.9741176E-04  -.9720237E-04  -.9698509E-04
  -.9674531E-04  -.9653782E-04  -.9635413E-04  -.9612977E-04  -.9593648E-04
  -.9586709E-04  -.9584739E-04  -.9582035E-04  -.9575003E-04  -.9560606E-04
  -.9540775E-04  -.9521384E-04  -.9506423E-04  -.9492410E-04  -.9477234E-04
  -.9458437E-04  -.9435288E-04  -.9409094E-04  -.9379772E-04  -.9349327E-04
  -.9320278E-04  -.9291844E-04  -.9262969E-04  -.9232332E-04  -.9200743E-04
  -.9169097E-04  -.9136062E-04  -.9101701E-04  -.9065451E-04  -.9027135E-04
  -.8987179E-04  -.8945532E-04  -.8902389E-04  -.8857794E-04  -.8811696E-04
