# Supplementary material for: Earthquake Response Analysis of Tall Reinforced Concrete Chimneys considering Eccentricity
Source: Hindawi journal article supplement (doi:10.1155/2020/1417969), 2020-03-11
Supplement: f1 [file 1417969.f1.zip › 1417969.f1/Four kinds of earthquake records/Soft rock/LOMAPCLS-UP.txt]

PEER STRONG MOTION DATABASE RECORD. PROCESSING BY PACIFIC ENGINEERING.
LOMA PRIETA 10/18/89 00:05, CORRALITOS,  UP (CDMG STATION 57007)
ACCELERATION TIME HISTORY IN UNITS OF G. FILTER POINTS: HP=0.2 Hz LP=32.0 Hz
NPTS=  7989, DT= .00500 SEC
  -.6599116E-02  -.7910295E-02  -.5956353E-02  -.1637023E-02  -.2099376E-02
  -.1919004E-02  -.1732545E-02  -.1578709E-02  -.1482776E-02  -.1443315E-02
  -.1440598E-02  -.1448996E-02  -.1450715E-02  -.1444325E-02  -.1435134E-02
  -.1431177E-02  -.1445969E-02  -.1491492E-02  -.1569762E-02  -.1670572E-02
  -.1777309E-02  -.1876146E-02  -.1961902E-02  -.2039585E-02  -.2121909E-02
  -.2217241E-02  -.2315729E-02  -.2394920E-02  -.2436592E-02  -.2432515E-02
  -.2386577E-02  -.2310741E-02  -.2218631E-02  -.2122740E-02  -.2031398E-02
  -.1944731E-02  -.1856108E-02  -.1762497E-02  -.1660351E-02  -.1550670E-02
  -.1451412E-02  -.1373078E-02  -.1311861E-02  -.1282158E-02  -.1297693E-02
  -.1359594E-02  -.1462895E-02  -.1591939E-02  -.1742211E-02  -.1909979E-02
  -.2082322E-02  -.2247029E-02  -.2392480E-02  -.2505829E-02  -.2592460E-02
  -.2670027E-02  -.2743085E-02  -.2810257E-02  -.2872307E-02  -.2932278E-02
  -.2993235E-02  -.3060689E-02  -.3125417E-02  -.3170082E-02  -.3185249E-02
  -.3161819E-02  -.3107351E-02  -.3038049E-02  -.2964806E-02  -.2898367E-02
  -.2841384E-02  -.2803341E-02  -.2792787E-02  -.2816555E-02  -.2878086E-02
  -.2951670E-02  -.3007297E-02  -.3016238E-02  -.2970916E-02  -.2888397E-02
  -.2749816E-02  -.2521861E-02  -.2213064E-02  -.1843554E-02  -.1399793E-02
  -.8841941E-03  -.3423007E-03   .2024220E-03   .7280157E-03   .1192346E-02
   .1565017E-02   .1828029E-02   .1951597E-02   .1891534E-02   .1608517E-02
   .1039428E-02   .1638219E-03  -.9635876E-03  -.2248342E-02  -.3597357E-02
  -.5030935E-02  -.6616098E-02  -.8314512E-02  -.1000034E-01  -.1153440E-01
  -.1276950E-01  -.1363826E-01  -.1415738E-01  -.1430508E-01  -.1407591E-01
  -.1341364E-01  -.1217496E-01  -.1027377E-01  -.7736074E-02  -.4719359E-02
  -.1422309E-02   .1934452E-02   .5151610E-02   .8096830E-02   .1080042E-01
   .1347947E-01   .1618097E-01   .1870222E-01   .2072430E-01   .2197720E-01
   .2241932E-01   .2203161E-01   .2072696E-01   .1851543E-01   .1554120E-01
   .1210254E-01   .8474285E-02   .4815161E-02   .1268584E-02  -.1940097E-02
  -.4467643E-02  -.6124341E-02  -.7021794E-02  -.7501808E-02  -.7845028E-02
  -.8104681E-02  -.8314949E-02  -.8385972E-02  -.8140663E-02  -.7621974E-02
  -.7018956E-02  -.6473998E-02  -.5848443E-02  -.4702372E-02  -.2634238E-02
   .4772409E-03   .4367062E-02   .8600092E-02   .1279031E-01   .1660794E-01
   .1971178E-01   .2189334E-01   .2323578E-01   .2383798E-01   .2367920E-01
   .2243673E-01   .1975093E-01   .1567136E-01   .1047042E-01   .4419771E-02
  -.2354113E-02  -.9754920E-02  -.1753173E-01  -.2538513E-01  -.3293499E-01
  -.3972481E-01  -.4547509E-01  -.4998750E-01  -.5306222E-01  -.5445671E-01
  -.5399594E-01  -.5185456E-01  -.4808422E-01  -.4245540E-01  -.3483630E-01
  -.2528062E-01  -.1435297E-01  -.3155509E-02   .7313992E-02   .1644841E-01
   .2391280E-01   .2956851E-01   .3298805E-01   .3345569E-01   .3096003E-01
   .2640804E-01   .2095406E-01   .1546916E-01   .1022651E-01   .4939966E-02
  -.7935931E-03  -.6986156E-02  -.1317855E-01  -.1861775E-01  -.2259958E-01
  -.2503998E-01  -.2642871E-01  -.2720697E-01  -.2735622E-01  -.2641455E-01
  -.2367662E-01  -.1825866E-01  -.9651455E-02   .1287017E-02   .1267621E-01
   .2303353E-01   .3179027E-01   .3889852E-01   .4424378E-01   .4763749E-01
   .4926056E-01   .4959150E-01   .4906717E-01   .4772122E-01   .4502998E-01
   .4040456E-01   .3424698E-01   .2834683E-01   .2458866E-01   .2315647E-01
   .2257885E-01   .2102477E-01   .1750917E-01   .1238512E-01   .6522001E-02
   .6529077E-03  -.4988139E-02  -.1050273E-01  -.1574041E-01  -.2049583E-01
  -.2466529E-01  -.2816427E-01  -.3104159E-01  -.3332536E-01  -.3503396E-01
  -.3605169E-01  -.3605932E-01  -.3480132E-01  -.3196570E-01  -.2750590E-01
  -.2168620E-01  -.1514081E-01  -.8957398E-02  -.4063803E-02  -.6643726E-03
   .1782603E-02   .3990690E-02   .6316356E-02   .8464733E-02   .1009446E-01
   .1074585E-01   .9544465E-02   .6250754E-02   .1489883E-02  -.3691173E-02
  -.8113819E-02  -.1098907E-01  -.1248734E-01  -.1340059E-01  -.1412713E-01
  -.1435598E-01  -.1339423E-01  -.1054973E-01  -.5803448E-02  -.1084047E-03
   .5257945E-02   .9107972E-02   .1079293E-01   .1031425E-01   .7948892E-02
   .4263242E-02   .1875201E-03  -.3288088E-02  -.5675459E-02  -.7083326E-02
  -.7883418E-02  -.8518917E-02  -.9604887E-02  -.1154217E-01  -.1446233E-01
  -.1854042E-01  -.2365800E-01  -.2915512E-01  -.3386588E-01  -.3668304E-01
  -.3701411E-01  -.3521415E-01  -.3226855E-01  -.2884783E-01  -.2557846E-01
  -.2264869E-01  -.1939331E-01  -.1505127E-01  -.8900872E-02  -.6007840E-03
   .9218878E-02   .1935560E-01   .2819843E-01   .3412767E-01   .3660538E-01
   .3622552E-01   .3441818E-01   .3275273E-01   .3178782E-01   .3122064E-01
   .3037910E-01   .2828321E-01   .2409679E-01   .1755433E-01   .9349488E-02
   .1398988E-02  -.4149794E-02  -.5738941E-02  -.2866347E-02   .3471977E-02
   .1174145E-01   .2088608E-01   .3032084E-01   .3966457E-01   .4866485E-01
   .5698072E-01   .6413006E-01   .6966787E-01   .7331561E-01   .7489868E-01
   .7397612E-01   .6989461E-01   .6204288E-01   .5017598E-01   .3545678E-01
   .2070310E-01   .9115702E-02   .2618419E-02   .8612953E-03   .1922582E-02
   .4148952E-02   .7477221E-02   .1308958E-01   .2201513E-01   .3395409E-01
   .4746721E-01   .6107324E-01   .7343107E-01   .8356124E-01   .9137412E-01
   .9709675E-01   .1008334E+00   .1022787E+00   .1009647E+00   .9681853E-01
   .8935910E-01   .7786707E-01   .6217141E-01   .4350884E-01   .2434906E-01
   .7222165E-02  -.5639740E-02  -.1339655E-01  -.1658246E-01  -.1699901E-01
  -.1657916E-01  -.1583991E-01  -.1500462E-01  -.1381039E-01  -.1167212E-01
  -.8812899E-02  -.5983434E-02  -.4633823E-02  -.6744416E-02  -.1382711E-01
  -.2603038E-01  -.4129925E-01  -.5645289E-01  -.6881942E-01  -.7670715E-01
  -.8042353E-01  -.8153017E-01  -.8115934E-01  -.7923533E-01  -.7381305E-01
  -.6303481E-01  -.4706991E-01  -.2823373E-01  -.9474079E-02   .7704853E-02
   .2280899E-01   .3553559E-01   .4545846E-01   .5152993E-01   .5225277E-01
   .4659307E-01   .3510170E-01   .2010025E-01   .4497278E-02  -.9185312E-02
  -.1984577E-01  -.2809327E-01  -.3512365E-01  -.4152999E-01  -.4615169E-01
  -.4580144E-01  -.3673834E-01  -.1773388E-01   .8787510E-02   .3808721E-01
   .6510378E-01   .8753843E-01   .1059119E+00   .1211187E+00   .1336271E+00
   .1432319E+00   .1492246E+00   .1511787E+00   .1485580E+00   .1409970E+00
   .1294111E+00   .1151999E+00   .1000174E+00   .8567499E-01   .7285623E-01
   .6082217E-01   .4817795E-01   .3484721E-01   .2299145E-01   .1455074E-01
   .9125539E-02   .4256579E-02  -.2776051E-02  -.1271977E-01  -.2457074E-01
  -.3716416E-01  -.4936288E-01  -.6024015E-01  -.6979749E-01  -.7860146E-01
  -.8728013E-01  -.9644220E-01  -.1064350E+00  -.1172945E+00  -.1285253E+00
  -.1394416E+00  -.1492949E+00  -.1569274E+00  -.1614898E+00  -.1633384E+00
  -.1632955E+00  -.1610907E+00  -.1550360E+00  -.1431583E+00  -.1244093E+00
  -.9961050E-01  -.7151510E-01  -.4298743E-01  -.1604269E-01   .7924523E-02
   .2842872E-01   .4587490E-01   .6117608E-01   .7491063E-01   .8655655E-01
   .9488635E-01   .9930609E-01   .1006568E+00   .9992785E-01   .9719150E-01
   .9182088E-01   .8337759E-01   .7264491E-01   .6128086E-01   .5063682E-01
   .4058386E-01   .2990173E-01   .1777068E-01   .4142024E-02  -.1088294E-01
  -.2725619E-01  -.4424815E-01  -.6026193E-01  -.7375771E-01  -.8442744E-01
  -.9339195E-01  -.1018117E+00  -.1109965E+00  -.1234859E+00  -.1410082E+00
  -.1621649E+00  -.1836447E+00  -.2035122E+00  -.2220044E+00  -.2385856E+00
  -.2494901E+00  -.2492008E+00  -.2341614E+00  -.2059516E+00  -.1718652E+00
  -.1412572E+00  -.1197859E+00  -.1056075E+00  -.9116719E-01  -.6813894E-01
  -.3056002E-01   .2542876E-01   .1042607E+00   .2072715E+00   .3195814E+00
   .4103984E+00   .4550420E+00   .4513353E+00   .4162031E+00   .3724841E+00
   .3383788E+00   .3222296E+00   .3210523E+00   .3241175E+00   .3197192E+00
   .2995334E+00   .2605015E+00   .2076661E+00   .1526329E+00   .1065654E+00
   .7501606E-01   .5676057E-01   .4642575E-01   .3921359E-01   .3244625E-01
   .2309281E-01   .6092744E-02  -.2321452E-01  -.6342889E-01  -.1062541E+00
  -.1439552E+00  -.1745968E+00  -.2000278E+00  -.2216461E+00  -.2388962E+00
  -.2517791E+00  -.2632635E+00  -.2768205E+00  -.2905381E+00  -.2972814E+00
  -.2908520E+00  -.2685200E+00  -.2275913E+00  -.1613014E+00  -.6614517E-01
   .4721912E-01   .1584600E+00   .2485558E+00   .3063740E+00   .3313364E+00
   .3297736E+00   .3070752E+00   .2661845E+00   .2120384E+00   .1496971E+00
   .8281650E-01   .1911401E-01  -.3005730E-01  -.5738796E-01  -.6484924E-01
  -.6314710E-01  -.6683812E-01  -.8629135E-01  -.1213353E+00  -.1616512E+00
  -.1940372E+00  -.2107330E+00  -.2107843E+00  -.1982120E+00  -.1798279E+00
  -.1623471E+00  -.1504604E+00  -.1462910E+00  -.1500644E+00  -.1597311E+00
  -.1710204E+00  -.1795168E+00  -.1839563E+00  -.1861102E+00  -.1860764E+00
  -.1796706E+00  -.1601695E+00  -.1254034E+00  -.8118709E-01  -.3422451E-01
   .1201179E-01   .5487213E-01   .9225192E-01   .1249240E+00   .1558812E+00
   .1847177E+00   .2040344E+00   .2065159E+00   .1945069E+00   .1764503E+00
   .1566297E+00   .1333425E+00   .1043329E+00   .6999494E-01   .3416899E-01
   .3245996E-02  -.1952256E-01  -.3714076E-01  -.5520367E-01  -.7651456E-01
  -.9888583E-01  -.1176629E+00  -.1292856E+00  -.1312334E+00  -.1220495E+00
  -.1032521E+00  -.7608500E-01  -.4012697E-01   .2458272E-02   .4324366E-01
   .6856671E-01   .7055351E-01   .5494399E-01   .3435026E-01   .2106598E-01
   .2267598E-01   .3861318E-01   .6148623E-01   .8138870E-01   .9272041E-01
   .9676822E-01   .9974799E-01   .1066930E+00   .1161545E+00   .1232004E+00
   .1244690E+00   .1212460E+00   .1182143E+00   .1177016E+00   .1157678E+00
   .1074108E+00   .9302985E-01   .7724693E-01   .6335667E-01   .5051700E-01
   .3741359E-01   .2483392E-01   .1492493E-01   .9930984E-02   .1027025E-01
   .1386535E-01   .1740440E-01   .1862517E-01   .1805464E-01   .1780273E-01
   .1838921E-01   .1776768E-01   .1366812E-01   .4267197E-02  -.1124991E-01
  -.2954276E-01  -.4508308E-01  -.5511617E-01  -.5936691E-01  -.5964769E-01
  -.5977314E-01  -.6161797E-01  -.6412653E-01  -.6546610E-01  -.6474508E-01
  -.6185070E-01  -.5665189E-01  -.4928335E-01  -.4026943E-01  -.3146307E-01
  -.2488202E-01  -.2062441E-01  -.1653725E-01  -.1080171E-01  -.4207621E-02
   .2022475E-02   .7021389E-02   .1015851E-01   .1170317E-01   .1222087E-01
   .1164886E-01   .9549139E-02   .6491280E-02   .3988840E-02   .2899404E-02
   .3786939E-02   .7645252E-02   .1364606E-01   .1783096E-01   .1655075E-01
   .1226357E-01   .1151143E-01   .1553661E-01   .1952292E-01   .1978573E-01
   .1660314E-01   .1084005E-01   .2084235E-02  -.9203384E-02  -.2207209E-01
  -.3651796E-01  -.5116672E-01  -.6132448E-01  -.6319084E-01  -.5806976E-01
  -.4991107E-01  -.4159513E-01  -.3444111E-01  -.2852634E-01  -.2406600E-01
  -.2103066E-01  -.1836985E-01  -.1581046E-01  -.1381694E-01  -.1342086E-01
  -.1493150E-01  -.1744264E-01  -.2078214E-01  -.2592257E-01  -.3433166E-01
  -.4721977E-01  -.6365138E-01  -.8004625E-01  -.9336970E-01  -.1029237E+00
  -.1087732E+00  -.1117741E+00  -.1128228E+00  -.1113742E+00  -.1068692E+00
  -.9943433E-01  -.8934282E-01  -.7478282E-01  -.5257324E-01  -.2372020E-01
   .2259072E-02   .1448274E-01   .1178564E-01   .1722230E-02  -.6739040E-02
  -.1001406E-01  -.9391839E-02  -.8147720E-02  -.9676355E-02  -.1380687E-01
  -.1818085E-01  -.2004539E-01  -.1809050E-01  -.1454248E-01  -.1269153E-01
  -.1356433E-01  -.1538488E-01  -.1604695E-01  -.1432143E-01  -.1120465E-01
  -.9108907E-02  -.7794869E-02  -.6058152E-02  -.5023906E-02  -.6274225E-02
  -.1109098E-01  -.2030620E-01  -.3294953E-01  -.4725872E-01  -.6164814E-01
  -.7476431E-01  -.8540221E-01  -.9322529E-01  -.9727182E-01  -.9684416E-01
  -.9466208E-01  -.9379004E-01  -.9471070E-01  -.9497927E-01  -.8809414E-01
  -.6725392E-01  -.3324499E-01   .5417307E-02   .3908997E-01   .6276978E-01
   .7941191E-01   .9559729E-01   .1140135E+00   .1319857E+00   .1453436E+00
   .1537962E+00   .1596615E+00   .1630911E+00   .1628032E+00   .1573880E+00
   .1480573E+00   .1420583E+00   .1454339E+00   .1539085E+00   .1537181E+00
   .1343314E+00   .1001812E+00   .6497172E-01   .4019249E-01   .2703296E-01
   .1714755E-01   .3731368E-02  -.1247894E-01  -.2933367E-01  -.4963888E-01
  -.7610072E-01  -.1034777E+00  -.1207808E+00  -.1194574E+00  -.9906974E-01
  -.6745752E-01  -.3261479E-01   .2233446E-02   .3657873E-01   .6901794E-01
   .9410279E-01   .1078249E+00   .1113285E+00   .1078136E+00   .1011374E+00
   .9500824E-01   .9201102E-01   .9074149E-01   .8548118E-01   .7292386E-01
   .5453298E-01   .3309296E-01   .1081523E-01  -.1131328E-01  -.3258843E-01
  -.5225028E-01  -.6865891E-01  -.7951080E-01  -.8454039E-01  -.8611947E-01
  -.8747525E-01  -.9055527E-01  -.9554498E-01  -.1022884E+00  -.1119211E+00
  -.1252865E+00  -.1408615E+00  -.1575886E+00  -.1754452E+00  -.1924664E+00
  -.2050825E+00  -.2097512E+00  -.2039599E+00  -.1860252E+00  -.1552687E+00
  -.1130261E+00  -.6475852E-01  -.2154920E-01   .5984234E-02   .1703480E-01
   .2028703E-01   .2460778E-01   .3238774E-01   .3948234E-01   .4012788E-01
   .3427704E-01   .2723594E-01   .2374248E-01   .2523725E-01   .2907123E-01
   .3211336E-01   .3340964E-01   .3377952E-01   .3439230E-01   .3527674E-01
   .3556905E-01   .3336302E-01   .2768025E-01   .1936193E-01   .1015450E-01
   .2268232E-02  -.2211532E-02  -.2147692E-02   .1610808E-02   .8130541E-02
   .1683123E-01   .2569099E-01   .3298077E-01   .3655928E-01   .3504569E-01
   .3090207E-01   .2716692E-01   .2477299E-01   .2172380E-01   .1621126E-01
   .9221176E-02   .2169195E-02  -.4914127E-02  -.1437866E-01  -.2891706E-01
  -.4762224E-01  -.6531962E-01  -.7889945E-01  -.9034994E-01  -.1029016E+00
  -.1187439E+00  -.1363021E+00  -.1513130E+00  -.1607248E+00  -.1641648E+00
  -.1628512E+00  -.1580897E+00  -.1516214E+00  -.1448333E+00  -.1378936E+00
  -.1294735E+00  -.1178964E+00  -.1031563E+00  -.8601802E-01  -.6586322E-01
  -.4119522E-01  -.1132694E-01   .2266551E-01   .5610308E-01   .8284629E-01
   .1000131E+00   .1080480E+00   .1087677E+00   .1046009E+00   .9889929E-01
   .9405163E-01   .9016264E-01   .8664875E-01   .8240261E-01   .7739812E-01
   .7346948E-01   .7205440E-01   .7282976E-01   .7369863E-01   .7326599E-01
   .7213667E-01   .7216138E-01   .7562294E-01   .8299637E-01   .9199121E-01
   .9886141E-01   .9975439E-01   .9381685E-01   .8409722E-01   .7357823E-01
   .6296370E-01   .5057114E-01   .3499708E-01   .1778522E-01   .1522610E-02
  -.1213149E-01  -.2349744E-01  -.3395517E-01  -.4323418E-01  -.4895854E-01
  -.4813089E-01  -.3930607E-01  -.2336385E-01  -.2043846E-02   .2394184E-01
   .5457080E-01   .8808819E-01   .1201740E+00   .1443226E+00   .1535544E+00
   .1444770E+00   .1197993E+00   .8766761E-01   .5931418E-01   .4397574E-01
   .4361844E-01   .5326067E-01   .6536971E-01   .7373686E-01   .7681437E-01
   .7711881E-01   .7727213E-01   .7804544E-01   .7809925E-01   .7556029E-01
   .6935318E-01   .5958729E-01   .4794721E-01   .3591972E-01   .2342447E-01
   .8953543E-02  -.8628477E-02  -.2835182E-01  -.4762452E-01  -.6387412E-01
  -.7676108E-01  -.8611516E-01  -.8969213E-01  -.8474288E-01  -.7003474E-01
  -.4755449E-01  -.2218581E-01   .7754625E-03   .1869348E-01   .3203581E-01
   .4298010E-01   .5391318E-01   .6492819E-01   .7388524E-01   .7881313E-01
   .7937936E-01   .7724305E-01   .7451482E-01   .7177072E-01   .6845639E-01
   .6411146E-01   .5791635E-01   .4916197E-01   .3822514E-01   .2565370E-01
   .1231005E-01  -.2690795E-03  -.1108040E-01  -.1971065E-01  -.2601798E-01
  -.3106237E-01  -.3640044E-01  -.4252607E-01  -.4932483E-01  -.5630029E-01
  -.6240021E-01  -.6748013E-01  -.7181947E-01  -.7552755E-01  -.7837259E-01
  -.7909190E-01  -.7772810E-01  -.7582914E-01  -.7450920E-01  -.7402833E-01
  -.7305058E-01  -.6939880E-01  -.6156579E-01  -.4920227E-01  -.3335124E-01
  -.1581966E-01   .2031161E-02   .1948897E-01   .3558820E-01   .5015127E-01
   .6415387E-01   .7879713E-01   .9348432E-01   .1046666E+00   .1097901E+00
   .1092860E+00   .1043909E+00   .9636251E-01   .8567266E-01   .7209192E-01
   .5658836E-01   .4082368E-01   .2623394E-01   .1396250E-01   .4606124E-02
  -.2730832E-02  -.9549585E-02  -.1603596E-01  -.2177204E-01  -.2629613E-01
  -.2915906E-01  -.2950986E-01  -.2657150E-01  -.2134066E-01  -.1579362E-01
  -.1101036E-01  -.7168467E-02  -.3942804E-02  -.8493577E-03   .1702333E-02
   .3096996E-02   .3474046E-02   .3857010E-02   .5420045E-02   .8577123E-02
   .1302336E-01   .1824034E-01   .2350401E-01   .2732802E-01   .2898923E-01
   .2864277E-01   .2712626E-01   .2580941E-01   .2467280E-01   .2311042E-01
   .2125015E-01   .1918019E-01   .1637393E-01   .1209859E-01   .5608989E-02
  -.3527745E-02  -.1531135E-01  -.2897495E-01  -.4246906E-01  -.5355972E-01
  -.6070231E-01  -.6369778E-01  -.6290122E-01  -.5869242E-01  -.5219683E-01
  -.4410413E-01  -.3459006E-01  -.2443230E-01  -.1528915E-01  -.9111027E-02
  -.8545341E-02  -.1565203E-01  -.2928108E-01  -.4588185E-01  -.6185976E-01
  -.7584897E-01  -.8838966E-01  -.9938299E-01  -.1075425E+00  -.1123972E+00
  -.1152884E+00  -.1184385E+00  -.1228418E+00  -.1265698E+00  -.1261726E+00
  -.1187505E+00  -.1044237E+00  -.8697309E-01  -.7069716E-01  -.5780925E-01
  -.4766038E-01  -.3772700E-01  -.2516839E-01  -.8954679E-02   .9286696E-02
   .2712744E-01   .4221871E-01   .5314275E-01   .6063456E-01   .6713071E-01
   .7516189E-01   .8590906E-01   .9816663E-01   .1082324E+00   .1129971E+00
   .1128071E+00   .1096367E+00   .1043979E+00   .9590807E-01   .8248263E-01
   .6518145E-01   .4661577E-01   .2846005E-01   .1069420E-01  -.8228007E-02
  -.2950863E-01  -.5289883E-01  -.7705642E-01  -.1007394E+00  -.1237188E+00
  -.1451271E+00  -.1618367E+00  -.1708197E+00  -.1716073E+00  -.1653685E+00
  -.1530158E+00  -.1351824E+00  -.1127401E+00  -.8677696E-01  -.5817561E-01
  -.2733613E-01   .4594977E-02   .3502972E-01   .6147923E-01   .8325848E-01
   .1015709E+00   .1175066E+00   .1296476E+00   .1348182E+00   .1307271E+00
   .1179532E+00   .1002612E+00   .8252105E-01   .6815897E-01   .5833187E-01
   .5165271E-01   .4417758E-01   .3203503E-01   .1518546E-01  -.1541103E-02
  -.1233307E-01  -.1556846E-01  -.1401828E-01  -.1185986E-01  -.1177791E-01
  -.1394734E-01  -.1733047E-01  -.2082708E-01  -.2382610E-01  -.2614430E-01
  -.2742099E-01  -.2703605E-01  -.2445816E-01  -.1935781E-01  -.1210476E-01
  -.4095407E-02   .2771744E-02   .7181475E-02   .9190546E-02   .1041115E-01
   .1235930E-01   .1558552E-01   .2035092E-01   .2597335E-01   .3116133E-01
   .3487183E-01   .3701022E-01   .3807074E-01   .3822612E-01   .3724973E-01
   .3473013E-01   .3060231E-01   .2541995E-01   .1999511E-01   .1477746E-01
   .9886138E-02   .4921321E-02  -.1002204E-03  -.4166684E-02  -.6373853E-02
  -.6666882E-02  -.6408726E-02  -.6387473E-02  -.5132385E-02  -.6543804E-03
   .7313995E-02   .1672437E-01   .2449490E-01   .2839052E-01   .2850270E-01
   .2686475E-01   .2590131E-01   .2707575E-01   .3041414E-01   .3546814E-01
   .4234127E-01   .5121049E-01   .6148576E-01   .7149903E-01   .7911650E-01
   .8316584E-01   .8408960E-01   .8322234E-01   .8151699E-01   .7897133E-01
   .7466797E-01   .6774842E-01   .5865847E-01   .4922841E-01   .4193324E-01
   .3826735E-01   .3753103E-01   .3761739E-01   .3665651E-01   .3417814E-01
   .3091430E-01   .2816164E-01   .2633605E-01   .2466555E-01   .2244433E-01
   .1873863E-01   .1288668E-01   .4977264E-02  -.4725355E-02  -.1529916E-01
  -.2492362E-01  -.3193429E-01  -.3564131E-01  -.3685221E-01  -.3723168E-01
  -.3794403E-01  -.3969028E-01  -.4285706E-01  -.4734246E-01  -.5282012E-01
  -.5950165E-01  -.6776983E-01  -.7751789E-01  -.8745250E-01  -.9547712E-01
  -.1009165E+00  -.1046608E+00  -.1078177E+00  -.1104854E+00  -.1118869E+00
  -.1109589E+00  -.1067023E+00  -.9944494E-01  -.9032823E-01  -.8026340E-01
  -.6949254E-01  -.5776460E-01  -.4508995E-01  -.3184506E-01  -.1926089E-01
  -.8747399E-02  -.9997547E-03   .4276677E-02   .7903394E-02   .1013166E-01
   .1043041E-01   .8031552E-02   .3205867E-02  -.2719337E-02  -.7913706E-02
  -.1107058E-01  -.1235836E-01  -.1253864E-01  -.1256361E-01  -.1260906E-01
  -.1202754E-01  -.1086309E-01  -.9668526E-02  -.9344248E-02  -.1062297E-01
  -.1384491E-01  -.1944078E-01  -.2794755E-01  -.3948370E-01  -.5316483E-01
  -.6715516E-01  -.7947299E-01  -.8921420E-01  -.9628778E-01  -.1012560E+00
  -.1044885E+00  -.1059467E+00  -.1059225E+00  -.1040540E+00  -.9959512E-01
  -.9221485E-01  -.8233066E-01  -.7102789E-01  -.5980606E-01  -.5002520E-01
  -.4227879E-01  -.3672948E-01  -.3280687E-01  -.2963042E-01  -.2664762E-01
  -.2372774E-01  -.2128710E-01  -.1967123E-01  -.1879501E-01  -.1797991E-01
  -.1645249E-01  -.1313023E-01  -.6370480E-02   .4623867E-02   .1970277E-01
   .3750581E-01   .5588147E-01   .7350147E-01   .8924140E-01   .1018707E+00
   .1103788E+00   .1140500E+00   .1133189E+00   .1095646E+00   .1045938E+00
   .1000618E+00   .9603063E-01   .9114746E-01   .8404534E-01   .7400860E-01
   .6113656E-01   .4630209E-01   .3128295E-01   .1802091E-01   .7574062E-02
   .1522295E-03  -.4549670E-02  -.7109716E-02  -.8431047E-02  -.8844822E-02
  -.7153960E-02  -.1659865E-02   .8101575E-02   .2144979E-01   .3735337E-01
   .5414422E-01   .6973966E-01   .8203491E-01   .8987552E-01   .9404500E-01
   .9590995E-01   .9596149E-01   .9414384E-01   .9081318E-01   .8672725E-01
   .8211788E-01   .7686273E-01   .7089396E-01   .6446545E-01   .5841114E-01
   .5306090E-01   .4772206E-01   .4125297E-01   .3300033E-01   .2319403E-01
   .1235643E-01   .1175351E-02  -.9209079E-02  -.1824874E-01  -.2640839E-01
  -.3396373E-01  -.4047393E-01  -.4520998E-01  -.4819911E-01  -.4979046E-01
  -.5039016E-01  -.5048374E-01  -.5016981E-01  -.4920119E-01  -.4706726E-01
  -.4380747E-01  -.3981858E-01  -.3564632E-01  -.3192302E-01  -.2866430E-01
  -.2448678E-01  -.1770776E-01  -.9234231E-02  -.1755738E-02   .2517793E-02
   .4021234E-02   .5017404E-02   .6870958E-02   .1018982E-01   .1437685E-01
   .1827116E-01   .2131938E-01   .2312163E-01   .2320420E-01   .2221058E-01
   .2141396E-01   .2102225E-01   .2016029E-01   .1752610E-01   .1319870E-01
   .8630975E-02   .5258570E-02   .3216584E-02   .6241297E-03  -.3837009E-02
  -.9991432E-02  -.1732033E-01  -.2439007E-01  -.2947741E-01  -.3166413E-01
  -.3061194E-01  -.2651679E-01  -.1956932E-01  -.9971878E-02   .1074651E-02
   .1185749E-01   .2064493E-01   .2667426E-01   .3072033E-01   .3326794E-01
   .3424665E-01   .3357241E-01   .3110566E-01   .2726818E-01   .2230436E-01
   .1641471E-01   .1058069E-01   .5763097E-02   .2241969E-02  -.6143190E-03
  -.3265917E-02  -.5355427E-02  -.6665869E-02  -.7002007E-02  -.5940416E-02
  -.3836335E-02  -.1399832E-02   .1100127E-02   .4128422E-02   .8546345E-02
   .1408952E-01   .1992178E-01   .2548832E-01   .2978419E-01   .3199331E-01
   .3202334E-01   .3028840E-01   .2745480E-01   .2385354E-01   .1947833E-01
   .1416298E-01   .8287244E-02   .2605184E-02  -.2458880E-02  -.6495730E-02
  -.9660067E-02  -.1270922E-01  -.1628051E-01  -.2033032E-01  -.2359119E-01
  -.2484453E-01  -.2382331E-01  -.2110225E-01  -.1780081E-01  -.1475685E-01
  -.1218108E-01  -.9691251E-02  -.6795544E-02  -.4128701E-02  -.2780061E-02
  -.2658952E-02  -.2963833E-02  -.2727150E-02  -.1354674E-02   .8697064E-03
   .3535336E-02   .6292306E-02   .9338895E-02   .1343081E-01   .1806821E-01
   .2180353E-01   .2412331E-01   .2548525E-01   .2662710E-01   .2828987E-01
   .3065165E-01   .3352391E-01   .3695719E-01   .4064500E-01   .4401008E-01
   .4658568E-01   .4739406E-01   .4633248E-01   .4382375E-01   .4020230E-01
   .3663728E-01   .3336546E-01   .2974298E-01   .2597068E-01   .2290742E-01
   .2103569E-01   .2036816E-01   .2052237E-01   .2134392E-01   .2310264E-01
   .2615132E-01   .3062030E-01   .3544692E-01   .3929486E-01   .4141290E-01
   .4131930E-01   .3926406E-01   .3606838E-01   .3216580E-01   .2822971E-01
   .2464937E-01   .2129690E-01   .1835344E-01   .1525665E-01   .1178222E-01
   .8577825E-02   .5603031E-02   .2419753E-02  -.9149858E-03  -.3596337E-02
  -.4426385E-02  -.2557466E-02   .2523202E-02   .1030342E-01   .1881848E-01
   .2604308E-01   .3092112E-01   .3284820E-01   .3244685E-01   .3195275E-01
   .3257686E-01   .3415979E-01   .3567401E-01   .3516473E-01   .3112722E-01
   .2265394E-01   .8089274E-02  -.1336738E-01  -.3958004E-01  -.6575326E-01
  -.8631607E-01  -.9827500E-01  -.1019236E+00  -.9996070E-01  -.9642300E-01
  -.9376346E-01  -.9182108E-01  -.8980356E-01  -.8664411E-01  -.8058458E-01
  -.7002426E-01  -.5476419E-01  -.3680547E-01  -.1903130E-01  -.3562004E-02
   .8720946E-02   .1881406E-01   .2868318E-01   .3930430E-01   .4940394E-01
   .5550565E-01   .5459137E-01   .4576726E-01   .3010559E-01   .1027949E-01
  -.1110685E-01  -.3266898E-01  -.5359360E-01  -.7295982E-01  -.9017461E-01
  -.1056597E+00  -.1203979E+00  -.1341136E+00  -.1450504E+00  -.1515797E+00
  -.1524639E+00  -.1469214E+00  -.1342026E+00  -.1145361E+00  -.9111993E-01
  -.6797399E-01  -.4776110E-01  -.3137873E-01  -.1843049E-01  -.8911530E-02
  -.3272035E-02  -.1036012E-02  -.2588387E-03   .1005484E-02   .3731841E-02
   .7978940E-02   .1303167E-01   .1797742E-01   .2222411E-01   .2598300E-01
   .2951826E-01   .3284003E-01   .3608676E-01   .3932775E-01   .4252363E-01
   .4558029E-01   .4824128E-01   .5044541E-01   .5244860E-01   .5403608E-01
   .5498786E-01   .5504152E-01   .5360592E-01   .5090031E-01   .4776871E-01
   .4526252E-01   .4391386E-01   .4330464E-01   .4330226E-01   .4440260E-01
   .4699011E-01   .5083507E-01   .5547474E-01   .6040439E-01   .6530581E-01
   .6936223E-01   .7165565E-01   .7237786E-01   .7156424E-01   .6852583E-01
   .6282142E-01   .5515762E-01   .4669816E-01   .3869210E-01   .3217325E-01
   .2676538E-01   .2139314E-01   .1522740E-01   .8593212E-02   .2283016E-02
  -.3602190E-02  -.9126521E-02  -.1500172E-01  -.2194724E-01  -.3012142E-01
  -.3860061E-01  -.4570121E-01  -.5101249E-01  -.5489953E-01  -.5818144E-01
  -.6138062E-01  -.6408808E-01  -.6640242E-01  -.6846759E-01  -.6956388E-01
  -.6826688E-01  -.6368278E-01  -.5700177E-01  -.5071895E-01  -.4706559E-01
  -.4632999E-01  -.4721130E-01  -.4917999E-01  -.5206733E-01  -.5517517E-01
  -.5750551E-01  -.5835618E-01  -.5775403E-01  -.5605266E-01  -.5379685E-01
  -.5116015E-01  -.4810390E-01  -.4509333E-01  -.4220596E-01  -.3855041E-01
  -.3330202E-01  -.2646164E-01  -.1872409E-01  -.1099058E-01  -.4396330E-02
   .2328101E-04   .2804872E-02   .5142262E-02   .7259181E-02   .9245741E-02
   .1108731E-01   .1203170E-01   .1159062E-01   .1022461E-01   .8290448E-02
   .5948845E-02   .4116562E-02   .3502398E-02   .3727843E-02   .4024975E-02
   .4060977E-02   .4090631E-02   .4805000E-02   .6787755E-02   .9617209E-02
   .1266942E-01   .1568824E-01   .1843356E-01   .2085977E-01   .2233489E-01
   .2246484E-01   .2145738E-01   .1933266E-01   .1670064E-01   .1414558E-01
   .1202570E-01   .1044648E-01   .9128588E-02   .8262268E-02   .8518249E-02
   .1012987E-01   .1331557E-01   .1833566E-01   .2472980E-01   .3209682E-01
   .3989827E-01   .4741450E-01   .5458965E-01   .6162425E-01   .6843438E-01
   .7461573E-01   .7915184E-01   .8107217E-01   .8032333E-01   .7696008E-01
   .7090191E-01   .6248779E-01   .5272797E-01   .4265246E-01   .3253518E-01
   .2269640E-01   .1347573E-01   .5051047E-02  -.3219819E-02  -.1211395E-01
  -.2104889E-01  -.2916987E-01  -.3577932E-01  -.4017331E-01  -.4243047E-01
  -.4321583E-01  -.4306224E-01  -.4226233E-01  -.4008940E-01  -.3554006E-01
  -.2768015E-01  -.1584503E-01  -.1102127E-02   .1462486E-01   .2952120E-01
   .4210702E-01   .5180025E-01   .5856187E-01   .6228055E-01   .6280558E-01
   .6026044E-01   .5454372E-01   .4539896E-01   .3307262E-01   .1839570E-01
   .3377357E-02  -.9563701E-02  -.1923259E-01  -.2566620E-01  -.2951493E-01
  -.3113416E-01  -.3035646E-01  -.2698130E-01  -.2137059E-01  -.1409660E-01
  -.4732299E-02   .6578343E-02   .1855472E-01   .2983092E-01   .3890283E-01
   .4506055E-01   .4829726E-01   .4844134E-01   .4525180E-01   .3875609E-01
   .2932726E-01   .1723950E-01   .2922559E-02  -.1288905E-01  -.2949301E-01
  -.4600958E-01  -.6144010E-01  -.7494183E-01  -.8556396E-01  -.9234544E-01
  -.9527240E-01  -.9465321E-01  -.9057712E-01  -.8350230E-01  -.7395381E-01
  -.6271956E-01  -.5092627E-01  -.3958625E-01  -.2971333E-01  -.2201260E-01
  -.1636118E-01  -.1258355E-01  -.1063589E-01  -.1000395E-01  -.1042531E-01
  -.1233053E-01  -.1599137E-01  -.2143329E-01  -.2827627E-01  -.3503286E-01
  -.4025545E-01  -.4334581E-01  -.4489547E-01  -.4587625E-01  -.4594208E-01
  -.4441472E-01  -.4140574E-01  -.3747614E-01  -.3304388E-01  -.2835736E-01
  -.2347575E-01  -.1862056E-01  -.1456370E-01  -.1197153E-01  -.1114831E-01
  -.1174338E-01  -.1305269E-01  -.1439142E-01  -.1545439E-01  -.1651232E-01
  -.1717916E-01  -.1694420E-01  -.1578392E-01  -.1380325E-01  -.1133753E-01
  -.8467298E-02  -.4895621E-02  -.2227399E-03   .5520506E-02   .1173342E-01
   .1776800E-01   .2331623E-01   .2785668E-01   .3085279E-01   .3232620E-01
   .3272448E-01   .3258661E-01   .3167643E-01   .2945482E-01   .2522378E-01
   .1893297E-01   .1193813E-01   .5491442E-02   .2963849E-03  -.3267226E-02
  -.5087364E-02  -.5466199E-02  -.4898315E-02  -.3431261E-02  -.8377833E-03
   .2981322E-02   .8107072E-02   .1475468E-01   .2264344E-01   .3106422E-01
   .3912319E-01   .4570980E-01   .5032991E-01   .5367481E-01   .5681352E-01
   .6036561E-01   .6407353E-01   .6683054E-01   .6795072E-01   .6775322E-01
   .6697556E-01   .6591481E-01   .6473254E-01   .6360416E-01   .6237432E-01
   .6112406E-01   .6019586E-01   .5981629E-01   .5959414E-01   .5912907E-01
   .5862570E-01   .5816343E-01   .5754348E-01   .5670088E-01   .5556205E-01
   .5370395E-01   .5098165E-01   .4766569E-01   .4445637E-01   .4199308E-01
   .4036882E-01   .3959619E-01   .3944613E-01   .3967466E-01   .4036670E-01
   .4160322E-01   .4284716E-01   .4380673E-01   .4456610E-01   .4485054E-01
   .4466082E-01   .4394245E-01   .4278216E-01   .4182817E-01   .4150549E-01
   .4163493E-01   .4178249E-01   .4152616E-01   .4056185E-01   .3896583E-01
   .3690790E-01   .3418464E-01   .3032886E-01   .2556074E-01   .2030584E-01
   .1490999E-01   .9798850E-02   .5146012E-02   .1336007E-02  -.1453941E-02
  -.3314502E-02  -.4275570E-02  -.4366633E-02  -.3673515E-02  -.2481265E-02
  -.1272425E-02  -.2893973E-03   .4630699E-03   .1046432E-02   .1409782E-02
   .1392537E-02   .1019228E-02   .5947175E-04  -.1423898E-02  -.3135316E-02
  -.5054386E-02  -.7502803E-02  -.1081155E-01  -.1410540E-01  -.1653219E-01
  -.1780169E-01  -.1774723E-01  -.1674517E-01  -.1519702E-01  -.1360554E-01
  -.1245725E-01  -.1178019E-01  -.1162339E-01  -.1206402E-01  -.1280065E-01
  -.1408455E-01  -.1636659E-01  -.1933538E-01  -.2239456E-01  -.2487041E-01
  -.2645403E-01  -.2728782E-01  -.2769255E-01  -.2801960E-01  -.2835042E-01
  -.2851401E-01  -.2838060E-01  -.2775454E-01  -.2639761E-01  -.2467898E-01
  -.2336267E-01  -.2266129E-01  -.2237113E-01  -.2218333E-01  -.2196997E-01
  -.2222516E-01  -.2351876E-01  -.2601556E-01  -.2945522E-01  -.3342905E-01
  -.3779766E-01  -.4232175E-01  -.4633565E-01  -.4892026E-01  -.4943745E-01
  -.4819700E-01  -.4584889E-01  -.4293168E-01  -.4001927E-01  -.3741385E-01
  -.3509878E-01  -.3284771E-01  -.3075411E-01  -.2904632E-01  -.2773539E-01
  -.2697570E-01  -.2673404E-01  -.2677751E-01  -.2706238E-01  -.2780329E-01
  -.2892156E-01  -.3009604E-01  -.3128080E-01  -.3221566E-01  -.3262704E-01
  -.3280190E-01  -.3285444E-01  -.3272389E-01  -.3248536E-01  -.3188989E-01
  -.3074730E-01  -.2903999E-01  -.2693048E-01  -.2467545E-01  -.2269993E-01
  -.2148303E-01  -.2101757E-01  -.2131783E-01  -.2226184E-01  -.2350452E-01
  -.2463953E-01  -.2521104E-01  -.2509474E-01  -.2455962E-01  -.2369005E-01
  -.2253984E-01  -.2155340E-01  -.2036938E-01  -.1851774E-01  -.1610366E-01
  -.1371655E-01  -.1257708E-01  -.1290723E-01  -.1419237E-01  -.1601787E-01
  -.1793925E-01  -.2027648E-01  -.2376785E-01  -.2884408E-01  -.3542380E-01
  -.4239256E-01  -.4839643E-01  -.5263943E-01  -.5481059E-01  -.5521423E-01
  -.5380115E-01  -.5041058E-01  -.4542117E-01  -.3948337E-01  -.3373598E-01
  -.2859527E-01  -.2334042E-01  -.1750269E-01  -.1116934E-01  -.4644674E-02
   .1433864E-02   .6194722E-02   .8849657E-02   .9248663E-02   .8005985E-02
   .6005687E-02   .3749449E-02   .1494507E-02  -.6404881E-03  -.3066138E-02
  -.6077993E-02  -.9505651E-02  -.1276455E-01  -.1517599E-01  -.1650602E-01
  -.1657851E-01  -.1543285E-01  -.1334285E-01  -.1007281E-01  -.5297720E-02
   .6799897E-03   .6967172E-02   .1249867E-01   .1630955E-01   .1795911E-01
   .1770576E-01   .1628654E-01   .1425800E-01   .1192595E-01   .9366984E-02
   .6421898E-02   .3475030E-02   .8464606E-03  -.1399547E-02  -.2912540E-02
  -.3579411E-02  -.3537970E-02  -.2975944E-02  -.2467063E-02  -.2169412E-02
  -.1587279E-02  -.6050600E-03   .5615504E-03   .1373369E-02   .1450407E-02
   .1061293E-02   .3673882E-03  -.4450053E-03  -.1305042E-02  -.2353051E-02
  -.3522449E-02  -.4906553E-02  -.6405573E-02  -.7865683E-02  -.9074996E-02
  -.9565116E-02  -.9621132E-02  -.9695084E-02  -.1000247E-01  -.1043214E-01
  -.1049581E-01  -.1032858E-01  -.1016351E-01  -.1000079E-01  -.9379884E-02
  -.7537965E-02  -.4581038E-02  -.1351973E-02   .1042269E-02   .2003416E-02
   .2122644E-02   .2414526E-02   .3521801E-02   .5468151E-02   .7973965E-02
   .1063038E-01   .1270216E-01   .1368090E-01   .1327511E-01   .1126631E-01
   .7920909E-02   .3876374E-02  -.2257756E-03  -.4176457E-02  -.7994175E-02
  -.1161031E-01  -.1479712E-01  -.1716154E-01  -.1895012E-01  -.2076163E-01
  -.2263199E-01  -.2417775E-01  -.2468509E-01  -.2346435E-01  -.2046620E-01
  -.1619795E-01  -.1149855E-01  -.7010645E-02  -.3057447E-02   .2202549E-03
   .3069217E-02   .5611030E-02   .7745214E-02   .9258724E-02   .9937900E-02
   .1000618E-01   .9429526E-02   .8160838E-02   .6660787E-02   .5182479E-02
   .3928299E-02   .3098275E-02   .2839468E-02   .3300873E-02   .4523435E-02
   .6376977E-02   .8947760E-02   .1258466E-01   .1725853E-01   .2242709E-01
   .2711806E-01   .3089144E-01   .3399221E-01   .3663708E-01   .3883200E-01
   .4032159E-01   .4117510E-01   .4177836E-01   .4257682E-01   .4377815E-01
   .4509717E-01   .4630159E-01   .4716982E-01   .4737411E-01   .4676184E-01
   .4529779E-01   .4288720E-01   .3969138E-01   .3662103E-01   .3433139E-01
   .3254267E-01   .3087537E-01   .2910512E-01   .2727293E-01   .2559237E-01
   .2449071E-01   .2424415E-01   .2453934E-01   .2551024E-01   .2710273E-01
   .2853560E-01   .2948539E-01   .3020312E-01   .3083083E-01   .3099813E-01
   .3005109E-01   .2758862E-01   .2387684E-01   .1958268E-01   .1538741E-01
   .1179796E-01   .9003006E-02   .6634538E-02   .3988489E-02   .9999522E-03
  -.2185216E-02  -.5829312E-02  -.9839880E-02  -.1362104E-01  -.1646136E-01
  -.1796050E-01  -.1843555E-01  -.1846876E-01  -.1811288E-01  -.1705764E-01
  -.1497330E-01  -.1147450E-01  -.6414254E-02  -.2349565E-03   .6046385E-02
   .1124048E-01   .1470613E-01   .1642807E-01   .1679196E-01   .1649325E-01
   .1576253E-01   .1427697E-01   .1188482E-01   .8639735E-02   .4708123E-02
   .5300867E-03  -.3537814E-02  -.7386129E-02  -.1111513E-01  -.1523017E-01
  -.1985405E-01  -.2441253E-01  -.2862201E-01  -.3223589E-01  -.3497780E-01
  -.3676746E-01  -.3722814E-01  -.3592307E-01  -.3222928E-01  -.2562524E-01
  -.1675481E-01  -.7483200E-02   .2910195E-03   .5550171E-02   .8249373E-02
   .9155217E-02   .9167838E-02   .8825928E-02   .7878319E-02   .5721149E-02
   .2649552E-02  -.6629685E-03  -.3798562E-02  -.6444524E-02  -.8653946E-02
  -.1048446E-01  -.1173519E-01  -.1232452E-01  -.1239509E-01  -.1204991E-01
  -.1126217E-01  -.9740793E-02  -.7348945E-02  -.4778369E-02  -.2945647E-02
  -.2417352E-02  -.3126225E-02  -.4410984E-02  -.5548533E-02  -.6142628E-02
  -.6310011E-02  -.6433113E-02  -.6365918E-02  -.5339904E-02  -.3290588E-02
  -.8854800E-03   .1333014E-02   .3327425E-02   .5255208E-02   .6696880E-02
   .7126752E-02   .6236345E-02   .4131028E-02   .1381044E-02  -.1664748E-02
  -.4616822E-02  -.7177449E-02  -.9367459E-02  -.1088760E-01  -.1132372E-01
  -.1064580E-01  -.9282908E-02  -.7674460E-02  -.5946041E-02  -.3684610E-02
   .1797070E-05   .5382692E-02   .1148204E-01   .1680287E-01   .2042610E-01
   .2232275E-01   .2306677E-01   .2330830E-01   .2321505E-01   .2247932E-01
   .2066867E-01   .1787726E-01   .1465917E-01   .1131063E-01   .7902996E-02
   .4815786E-02   .2681702E-02   .1642328E-02   .1873140E-02   .3706538E-02
   .6564113E-02   .9550430E-02   .1237226E-01   .1493573E-01   .1717117E-01
   .1895517E-01   .2003256E-01   .2023210E-01   .1971221E-01   .1911794E-01
   .1865664E-01   .1782068E-01   .1602988E-01   .1291125E-01   .8838162E-02
   .4856162E-02   .1891332E-02   .1558135E-03  -.1036012E-02  -.2433748E-02
  -.4106341E-02  -.5949862E-02  -.7890127E-02  -.9867404E-02  -.1201011E-01
  -.1424707E-01  -.1621257E-01  -.1777832E-01  -.1916183E-01  -.2049621E-01
  -.2156061E-01  -.2198480E-01  -.2157681E-01  -.2018925E-01  -.1793317E-01
  -.1489465E-01  -.1102579E-01  -.6774273E-02  -.2560136E-02   .1419155E-02
   .5108808E-02   .8756977E-02   .1241559E-01   .1570194E-01   .1823272E-01
   .1985712E-01   .2054173E-01   .2043034E-01   .1953916E-01   .1768706E-01
   .1488248E-01   .1131473E-01   .7305615E-02   .3040685E-02  -.1286771E-02
  -.5219470E-02  -.8622467E-02  -.1138004E-01  -.1315155E-01  -.1404934E-01
  -.1447366E-01  -.1486762E-01  -.1521714E-01  -.1499913E-01  -.1399698E-01
  -.1231415E-01  -.1032175E-01  -.8421996E-02  -.6807599E-02  -.5375620E-02
  -.3929701E-02  -.2497684E-02  -.1064287E-02   .2649090E-03   .1347694E-02
   .2157517E-02   .2397705E-02   .1635626E-02  -.3051625E-03  -.3264409E-02
  -.6842671E-02  -.1074129E-01  -.1472279E-01  -.1829196E-01  -.2104795E-01
  -.2289498E-01  -.2381691E-01  -.2410606E-01  -.2402998E-01  -.2359929E-01
  -.2290272E-01  -.2201883E-01  -.2105919E-01  -.1993949E-01  -.1850762E-01
  -.1676000E-01  -.1485997E-01  -.1320035E-01  -.1202866E-01  -.1129353E-01
  -.1060119E-01  -.9758028E-02  -.9051735E-02  -.8810507E-02  -.9134418E-02
  -.9863452E-02  -.1087198E-01  -.1198766E-01  -.1298779E-01  -.1383744E-01
  -.1464053E-01  -.1535584E-01  -.1560679E-01  -.1501398E-01  -.1360668E-01
  -.1166605E-01  -.9334962E-02  -.6608535E-02  -.3367219E-02   .4575580E-03
   .4686476E-02   .8943344E-02   .1265552E-01   .1538632E-01   .1715501E-01
   .1800222E-01   .1788558E-01   .1706222E-01   .1572668E-01   .1371387E-01
   .1079081E-01   .7136213E-02   .3257167E-02  -.6180467E-03  -.4329266E-02
  -.7479242E-02  -.9766804E-02  -.1127715E-01  -.1226887E-01  -.1273542E-01
  -.1234197E-01  -.1095983E-01  -.8899912E-02  -.6648665E-02  -.4484900E-02
  -.2207224E-02   .4101187E-03   .3355748E-02   .6501650E-02   .9558766E-02
   .1227004E-01   .1455191E-01   .1654258E-01   .1852558E-01   .2060473E-01
   .2282546E-01   .2494489E-01   .2651648E-01   .2750700E-01   .2818153E-01
   .2855562E-01   .2822609E-01   .2707661E-01   .2514955E-01   .2248969E-01
   .1949715E-01   .1646373E-01   .1363650E-01   .1121159E-01   .9124405E-02
   .7510666E-02   .6391504E-02   .5240410E-02   .3772558E-02   .2287524E-02
   .1159856E-02   .6807229E-03   .8087756E-03   .8143651E-03   .7558804E-04
  -.8625800E-03  -.9089397E-03   .5004539E-03   .2861133E-02   .5070014E-02
   .6820537E-02   .8626857E-02   .1084067E-01   .1309603E-01   .1472479E-01
   .1545075E-01   .1547807E-01   .1533220E-01   .1536727E-01   .1557191E-01
   .1588007E-01   .1630777E-01   .1696392E-01   .1786794E-01   .1850154E-01
   .1811161E-01   .1645935E-01   .1392487E-01   .1103976E-01   .8207655E-02
   .5729615E-02   .3839596E-02   .2490475E-02   .1469916E-02   .8158445E-03
   .7479808E-03   .1533670E-02   .3023267E-02   .4938208E-02   .7209400E-02
   .9458721E-02   .1118915E-01   .1202731E-01   .1171165E-01   .1050698E-01
   .8946852E-02   .7267060E-02   .5481466E-02   .3335385E-02   .7928120E-03
  -.1867737E-02  -.4217718E-02  -.5912482E-02  -.7060058E-02  -.7770415E-02
  -.8087421E-02  -.8260412E-02  -.8663406E-02  -.9027104E-02  -.8578486E-02
  -.7096171E-02  -.5012365E-02  -.3036935E-02  -.1674306E-02  -.9067725E-03
  -.3713948E-03   .4283171E-03   .1806784E-02   .3656464E-02   .5972937E-02
   .9102005E-02   .1293355E-01   .1673765E-01   .1999327E-01   .2271475E-01
   .2485627E-01   .2602739E-01   .2603609E-01   .2484860E-01   .2272623E-01
   .2027937E-01   .1769709E-01   .1502413E-01   .1259766E-01   .1072360E-01
   .9621563E-02   .9433814E-02   .9853874E-02   .1025235E-01   .1034744E-01
   .1021338E-01   .9983465E-02   .9817689E-02   .9413686E-02   .8395185E-02
   .6842556E-02   .4752015E-02   .2225539E-02  -.5141405E-03  -.3267920E-02
  -.5717122E-02  -.7850061E-02  -.9927825E-02  -.1199427E-01  -.1366940E-01
  -.1432083E-01  -.1379449E-01  -.1233712E-01  -.1026161E-01  -.7972527E-02
  -.5336763E-02  -.1883053E-02   .2380330E-02   .6807976E-02   .1047568E-01
   .1289725E-01   .1422550E-01   .1470731E-01   .1415017E-01   .1229555E-01
   .9390502E-02   .6052911E-02   .2857582E-02  -.2894860E-04  -.2757036E-02
  -.5486363E-02  -.7956851E-02  -.9720764E-02  -.1088531E-01  -.1187013E-01
  -.1277835E-01  -.1348268E-01  -.1377619E-01  -.1344937E-01  -.1258881E-01
  -.1132199E-01  -.9705935E-02  -.7920361E-02  -.6273674E-02  -.5203620E-02
  -.5266450E-02  -.6783975E-02  -.9446741E-02  -.1264187E-01  -.1602289E-01
  -.1923975E-01  -.2159588E-01  -.2265734E-01  -.2246869E-01  -.2129472E-01
  -.1934658E-01  -.1683889E-01  -.1415008E-01  -.1163948E-01  -.9641058E-02
  -.8396689E-02  -.7826034E-02  -.7520653E-02  -.7104605E-02  -.6294624E-02
  -.5190686E-02  -.4391521E-02  -.4249704E-02  -.4751877E-02  -.5766304E-02
  -.6941708E-02  -.7839251E-02  -.8467442E-02  -.9193566E-02  -.9944902E-02
  -.1046827E-01  -.1080888E-01  -.1123799E-01  -.1202747E-01  -.1302156E-01
  -.1388062E-01  -.1437397E-01  -.1441828E-01  -.1423008E-01  -.1406448E-01
  -.1391974E-01  -.1386902E-01  -.1387622E-01  -.1368848E-01  -.1329554E-01
  -.1265038E-01  -.1160423E-01  -.9982427E-02  -.7803908E-02  -.5564655E-02
  -.3590579E-02  -.1753170E-02   .1840951E-03   .2201107E-02   .4030159E-02
   .5514136E-02   .6447206E-02   .6348307E-02   .4895173E-02   .2266377E-02
  -.1180912E-02  -.5121489E-02  -.9240578E-02  -.1329007E-01  -.1705273E-01
  -.2026401E-01  -.2263280E-01  -.2384693E-01  -.2400319E-01  -.2366351E-01
  -.2300315E-01  -.2184791E-01  -.2027814E-01  -.1837675E-01  -.1621091E-01
  -.1410379E-01  -.1229135E-01  -.1083704E-01  -.9581693E-02  -.8353761E-02
  -.7388472E-02  -.6954924E-02  -.6894150E-02  -.6774678E-02  -.6370684E-02
  -.5827447E-02  -.5496236E-02  -.5475528E-02  -.5583440E-02  -.5686056E-02
  -.5787045E-02  -.6061799E-02  -.6606861E-02  -.7416076E-02  -.8540810E-02
  -.1011778E-01  -.1216401E-01  -.1434109E-01  -.1636567E-01  -.1834505E-01
  -.2033063E-01  -.2204621E-01  -.2328471E-01  -.2404932E-01  -.2449717E-01
  -.2479910E-01  -.2495764E-01  -.2484346E-01  -.2422144E-01  -.2312852E-01
  -.2187581E-01  -.2066904E-01  -.1938252E-01  -.1756295E-01  -.1501566E-01
  -.1208476E-01  -.9039223E-02  -.5693415E-02  -.1788225E-02   .2563495E-02
   .6828751E-02   .1049107E-01   .1325456E-01   .1517316E-01   .1675021E-01
   .1866808E-01   .2117017E-01   .2369926E-01   .2548518E-01   .2620724E-01
   .2610593E-01   .2577336E-01   .2567444E-01   .2581061E-01   .2595908E-01
   .2582142E-01   .2522363E-01   .2430137E-01   .2321080E-01   .2197563E-01
   .2071987E-01   .1963142E-01   .1854435E-01   .1704435E-01   .1484781E-01
   .1209703E-01   .9210096E-02   .6399376E-02   .3661461E-02   .9171266E-03
  -.1703332E-02  -.3849631E-02  -.5514701E-02  -.6936967E-02  -.8171096E-02
  -.9101814E-02  -.9516713E-02  -.9335709E-02  -.8622147E-02  -.7466292E-02
  -.5974981E-02  -.4285352E-02  -.2773721E-02  -.1921567E-02  -.1696171E-02
  -.1560484E-02  -.1095878E-02  -.2645947E-03   .5159526E-03   .6970106E-03
   .2255524E-03  -.4701778E-03  -.1053866E-02  -.1332471E-02  -.1103072E-02
  -.5103590E-03   .9259538E-04   .7187313E-03   .1477192E-02   .2197882E-02
   .2738381E-02   .3331138E-02   .4485738E-02   .6289812E-02   .8156170E-02
   .9490784E-02   .1023804E-01   .1088621E-01   .1176463E-01   .1273031E-01
   .1370573E-01   .1473006E-01   .1568567E-01   .1618443E-01   .1594517E-01
   .1525440E-01   .1455983E-01   .1385155E-01   .1284090E-01   .1135639E-01
   .9468297E-02   .7382061E-02   .5112418E-02   .2663535E-02   .2453706E-03
  -.1827544E-02  -.3385352E-02  -.4646348E-02  -.5821566E-02  -.6898853E-02
  -.7811558E-02  -.8501418E-02  -.8920187E-02  -.9145919E-02  -.9185104E-02
  -.8668330E-02  -.7461694E-02  -.5815758E-02  -.3751514E-02  -.1036169E-02
   .2479616E-02   .6574305E-02   .1064979E-01   .1397268E-01   .1611677E-01
   .1736245E-01   .1823785E-01   .1909652E-01   .2013104E-01   .2133192E-01
   .2263034E-01   .2384085E-01   .2464861E-01   .2500371E-01   .2530789E-01
   .2588986E-01   .2681604E-01   .2802305E-01   .2905581E-01   .2941266E-01
   .2912717E-01   .2866217E-01   .2838537E-01   .2812989E-01   .2757952E-01
   .2688791E-01   .2650238E-01   .2657945E-01   .2677931E-01   .2674857E-01
   .2646168E-01   .2629921E-01   .2662870E-01   .2738998E-01   .2819920E-01
   .2857956E-01   .2810030E-01   .2630391E-01   .2331451E-01   .1946675E-01
   .1491430E-01   .1004122E-01   .5103338E-02   .5007207E-03  -.3776754E-02
  -.8455356E-02  -.1350235E-01  -.1766842E-01  -.1951536E-01  -.1830093E-01
  -.1420560E-01  -.8497056E-02  -.2764736E-02   .2037182E-02   .5844544E-02
   .9141711E-02   .1219104E-01   .1482447E-01   .1644141E-01   .1642019E-01
   .1470994E-01   .1180568E-01   .8426459E-02   .5116940E-02   .2147560E-02
  -.2423744E-03  -.1806471E-02  -.2475992E-02  -.2334416E-02  -.1633957E-02
  -.5691188E-03   .8909088E-03   .2584786E-02   .4068153E-02   .4823610E-02
   .4578617E-02   .3647042E-02   .2614960E-02   .1522591E-02  -.1673702E-03
  -.2749531E-02  -.5839243E-02  -.8959821E-02  -.1189909E-01  -.1457990E-01
  -.1725379E-01  -.1994428E-01  -.2208484E-01  -.2315578E-01  -.2311816E-01
  -.2251271E-01  -.2209480E-01  -.2193371E-01  -.2127339E-01  -.1949440E-01
  -.1660796E-01  -.1293268E-01  -.8766563E-02  -.4218087E-02   .7155516E-03
   .5889557E-02   .1087186E-01   .1521209E-01   .1875660E-01   .2151983E-01
   .2348358E-01   .2447235E-01   .2430293E-01   .2301092E-01   .2077551E-01
   .1795471E-01   .1515193E-01   .1284392E-01   .1099526E-01   .9196971E-02
   .7110308E-02   .4806310E-02   .2541165E-02   .6360702E-03  -.4940507E-03
  -.7283481E-03  -.2349220E-03   .7700913E-03   .2025047E-02   .3303201E-02
   .4708701E-02   .6621468E-02   .8941349E-02   .1090528E-01   .1199121E-01
   .1220802E-01   .1172558E-01   .1069753E-01   .9102176E-02   .6682168E-02
   .3353658E-02  -.5552228E-03  -.4720961E-02  -.8991399E-02  -.1324015E-01
  -.1732110E-01  -.2100709E-01  -.2404258E-01  -.2639548E-01  -.2821196E-01
  -.2972841E-01  -.3105224E-01  -.3196907E-01  -.3233651E-01  -.3199983E-01
  -.3064797E-01  -.2824097E-01  -.2505255E-01  -.2135687E-01  -.1706093E-01
  -.1187242E-01  -.6003515E-02  -.3689072E-03   .4033379E-02   .7005544E-02
   .9222345E-02   .1148016E-01   .1400875E-01   .1639458E-01   .1816722E-01
   .1923707E-01   .1960495E-01   .1918654E-01   .1815913E-01   .1699845E-01
   .1619172E-01   .1595466E-01   .1605887E-01   .1584368E-01   .1477509E-01
   .1283250E-01   .1038804E-01   .8189828E-02   .6912500E-02   .6616806E-02
   .6835320E-02   .7033944E-02   .6943393E-02   .6697148E-02   .6440288E-02
   .5873809E-02   .4465268E-02   .1921722E-02  -.1576968E-02  -.5468506E-02
  -.9027211E-02  -.1169983E-01  -.1319498E-01  -.1383862E-01  -.1470974E-01
  -.1668587E-01  -.1967704E-01  -.2267745E-01  -.2482683E-01  -.2605800E-01
  -.2656134E-01  -.2647150E-01  -.2607780E-01  -.2567554E-01  -.2527416E-01
  -.2463397E-01  -.2331078E-01  -.2125308E-01  -.1899512E-01  -.1705510E-01
  -.1541686E-01  -.1382327E-01  -.1248845E-01  -.1181544E-01  -.1156932E-01
  -.1101295E-01  -.9802440E-02  -.8215182E-02  -.6853701E-02  -.5863847E-02
  -.4917116E-02  -.3836513E-02  -.2424471E-02  -.6262675E-03   .1453023E-02
   .3711713E-02   .5776675E-02   .7302432E-02   .8681005E-02   .1041964E-01
   .1243200E-01   .1433246E-01   .1557588E-01   .1585142E-01   .1532405E-01
   .1459100E-01   .1390054E-01   .1304458E-01   .1198826E-01   .1053463E-01
   .8847147E-02   .7198949E-02   .5338629E-02   .3335261E-02   .1481369E-02
  -.1375895E-03  -.1425200E-02  -.2419705E-02  -.3366272E-02  -.4379593E-02
  -.5473467E-02  -.6647134E-02  -.7887226E-02  -.9382700E-02  -.1113117E-01
  -.1310360E-01  -.1543377E-01  -.1768857E-01  -.1938596E-01  -.2048934E-01
  -.2073037E-01  -.1981475E-01  -.1800620E-01  -.1579450E-01  -.1321496E-01
  -.9925465E-02  -.6029592E-02  -.1895688E-02   .2228707E-02   .6143953E-02
   .9764374E-02   .1306886E-01   .1607810E-01   .1854331E-01   .2025639E-01
   .2118597E-01   .2134833E-01   .2144954E-01   .2188639E-01   .2224337E-01
   .2233580E-01   .2193802E-01   .2083246E-01   .1914919E-01   .1711281E-01
   .1506407E-01   .1328484E-01   .1158160E-01   .9542538E-02   .7044670E-02
   .4290717E-02   .1561743E-02  -.1120369E-02  -.4101201E-02  -.7619304E-02
  -.1154791E-01  -.1562422E-01  -.1955820E-01  -.2306415E-01  -.2585804E-01
  -.2804030E-01  -.2985120E-01  -.3145566E-01  -.3302674E-01  -.3457543E-01
  -.3568551E-01  -.3571306E-01  -.3461285E-01  -.3258681E-01  -.2984314E-01
  -.2687992E-01  -.2405679E-01  -.2130805E-01  -.1884037E-01  -.1687062E-01
  -.1517080E-01  -.1372527E-01  -.1257660E-01  -.1185796E-01  -.1162762E-01
  -.1197948E-01  -.1301301E-01  -.1430103E-01  -.1563118E-01  -.1676806E-01
  -.1751730E-01  -.1802546E-01  -.1832156E-01  -.1855562E-01  -.1861894E-01
  -.1847340E-01  -.1815597E-01  -.1747825E-01  -.1629825E-01  -.1442646E-01
  -.1209587E-01  -.9831610E-02  -.7850740E-02  -.5990693E-02  -.4261557E-02
  -.2695881E-02  -.1220452E-02   .1920506E-03   .1839486E-02   .3729644E-02
   .5673995E-02   .7852326E-02   .1006038E-01   .1174184E-01   .1294203E-01
   .1399471E-01   .1497232E-01   .1587154E-01   .1651626E-01   .1651350E-01
   .1591792E-01   .1520007E-01   .1443381E-01   .1330585E-01   .1165065E-01
   .9594884E-02   .7339088E-02   .5250123E-02   .3613408E-02   .2219647E-02
   .9618615E-03   .2102681E-03   .3399445E-03   .1087347E-02   .1765279E-02
   .2096473E-02   .2175723E-02   .2159508E-02   .1997680E-02   .1569934E-02
   .1089393E-02   .8283214E-03   .7838923E-03   .1064396E-02   .1898267E-02
   .3022301E-02   .4218235E-02   .5373260E-02   .6193776E-02   .6702927E-02
   .7273579E-02   .8052571E-02   .8651448E-02   .8876653E-02   .8826351E-02
   .8655410E-02   .8587622E-02   .8611780E-02   .8844481E-02   .9186884E-02
   .9301982E-02   .9359426E-02   .9313242E-02   .8870907E-02   .8319343E-02
   .7832249E-02   .7347045E-02   .6638180E-02   .5531011E-02   .4261811E-02
   .2864953E-02   .1693309E-02   .8906059E-03   .1655417E-03  -.1618286E-03
   .2917668E-03   .1451043E-02   .2897569E-02   .4099987E-02   .4800734E-02
   .5117209E-02   .5166215E-02   .4819071E-02   .3954799E-02   .2877395E-02
   .1965190E-02   .1048533E-02  -.1930521E-03  -.1569187E-02  -.2696548E-02
  -.3285449E-02  -.3175819E-02  -.2869669E-02  -.2889661E-02  -.3225396E-02
  -.3607781E-02  -.3716888E-02  -.3417761E-02  -.2660640E-02  -.1734209E-02
  -.1398831E-02  -.1782023E-02  -.2413859E-02  -.2951524E-02  -.3231224E-02
  -.3584241E-02  -.4341917E-02  -.5399470E-02  -.6343947E-02  -.7048559E-02
  -.7909588E-02  -.9286065E-02  -.1105295E-01  -.1261474E-01  -.1380900E-01
  -.1491988E-01  -.1575121E-01  -.1643712E-01  -.1709387E-01  -.1728716E-01
  -.1715059E-01  -.1658049E-01  -.1542675E-01  -.1388536E-01  -.1194865E-01
  -.9923832E-02  -.8064197E-02  -.6289305E-02  -.4554723E-02  -.2968300E-02
  -.1600895E-02  -.4896216E-03   .4743436E-03   .1493747E-02   .2513877E-02
   .3324927E-02   .3454814E-02   .2735743E-02   .1787622E-02   .1155993E-02
   .1022245E-02   .1308273E-02   .1923887E-02   .2925191E-02   .4155621E-02
   .5526942E-02   .7011673E-02   .8393530E-02   .9342311E-02   .9897027E-02
   .1045330E-01   .1117545E-01   .1189658E-01   .1243590E-01   .1281692E-01
   .1288739E-01   .1231105E-01   .1092910E-01   .9229330E-02   .7676178E-02
   .5818359E-02   .3583629E-02   .1322300E-02  -.8252718E-03  -.2553812E-02
  -.3863721E-02  -.4714358E-02  -.5154401E-02  -.5530642E-02  -.5885284E-02
  -.6404587E-02  -.6772051E-02  -.6279913E-02  -.4929052E-02  -.3447889E-02
  -.2508767E-02  -.2024258E-02  -.1834971E-02  -.1554546E-02  -.1005700E-02
  -.4077099E-03   .3714814E-03   .1211568E-02   .1943500E-02   .2641541E-02
   .2941006E-02   .2886513E-02   .2895547E-02   .2787119E-02   .2518615E-02
   .2125494E-02   .1570891E-02   .1113357E-02   .9050126E-03   .7649846E-03
   .5328732E-03   .3639261E-04  -.9072770E-03  -.2214819E-02  -.3624039E-02
  -.4963790E-02  -.6217194E-02  -.7214668E-02  -.7930149E-02  -.8646712E-02
  -.9436800E-02  -.1040787E-01  -.1147380E-01  -.1232451E-01  -.1292050E-01
  -.1321721E-01  -.1321305E-01  -.1311052E-01  -.1309876E-01  -.1326708E-01
  -.1362255E-01  -.1428591E-01  -.1519437E-01  -.1627508E-01  -.1760521E-01
  -.1906166E-01  -.2047154E-01  -.2177900E-01  -.2311658E-01  -.2414714E-01
  -.2428366E-01  -.2333035E-01  -.2141551E-01  -.1882230E-01  -.1571626E-01
  -.1272399E-01  -.1047528E-01  -.8681569E-02  -.6844959E-02  -.4795087E-02
  -.2872836E-02  -.1168143E-02   .4549447E-03   .1635493E-02   .2430002E-02
   .3138128E-02   .3440290E-02   .3288335E-02   .2933861E-02   .2527220E-02
   .2383949E-02   .2637965E-02   .3296163E-02   .4353520E-02   .5913743E-02
   .7597654E-02   .8875734E-02   .9976056E-02   .1093864E-01   .1170570E-01
   .1233325E-01   .1278625E-01   .1303528E-01   .1316066E-01   .1338877E-01
   .1339700E-01   .1301328E-01   .1237496E-01   .1131223E-01   .9932779E-02
   .8603818E-02   .7737387E-02   .7500282E-02   .7713831E-02   .8182305E-02
   .8791941E-02   .9796608E-02   .1126531E-01   .1287474E-01   .1402287E-01
   .1437080E-01   .1425626E-01   .1382537E-01   .1317369E-01   .1226183E-01
   .1105444E-01   .9832051E-02   .8615906E-02   .7274905E-02   .6075610E-02
   .5420213E-02   .5331355E-02   .5494945E-02   .5355350E-02   .4535132E-02
   .3280775E-02   .2298722E-02   .2103950E-02   .2653940E-02   .3615162E-02
   .4511952E-02   .4928877E-02   .4792625E-02   .4144115E-02   .3151229E-02
   .1858464E-02  -.1667853E-03  -.3079795E-02  -.6372682E-02  -.9478666E-02
  -.1236217E-01  -.1509735E-01  -.1748875E-01  -.1930202E-01  -.2049234E-01
  -.2124072E-01  -.2144133E-01  -.2102656E-01  -.2001523E-01  -.1819842E-01
  -.1563841E-01  -.1274387E-01  -.1003606E-01  -.7738760E-02  -.6070111E-02
  -.5026105E-02  -.4063993E-02  -.3064842E-02  -.2114153E-02  -.1388789E-02
  -.1107181E-02  -.9812790E-03  -.7738630E-03  -.5513544E-03  -.3524245E-03
  -.2193776E-03  -.2703903E-03  -.3584842E-03  -.3462812E-03  -.3230565E-03
  -.2925630E-03  -.2946201E-03  -.4563664E-03  -.8467370E-03  -.1631616E-02
  -.3036768E-02  -.5089439E-02  -.7747485E-02  -.1049057E-01  -.1279764E-01
  -.1471132E-01  -.1636130E-01  -.1763501E-01  -.1812657E-01  -.1743100E-01
  -.1542476E-01  -.1253945E-01  -.9172371E-02  -.5544725E-02  -.2028958E-02
   .1122663E-02   .3841169E-02   .6028824E-02   .7766209E-02   .9345465E-02
   .1059407E-01   .1119361E-01   .1117826E-01   .1077130E-01   .1016075E-01
   .9403909E-02   .8298531E-02   .6721487E-02   .5078287E-02   .3548632E-02
   .2162900E-02   .1133337E-02   .3350271E-03  -.3717431E-03  -.1000669E-02
  -.1772050E-02  -.2784725E-02  -.3757985E-02  -.4316884E-02  -.4316310E-02
  -.3714298E-02  -.2529117E-02  -.9412432E-03   .7715827E-03   .2358472E-02
   .3792854E-02   .5139688E-02   .6616870E-02   .8142691E-02   .9399705E-02
   .1048146E-01   .1124822E-01   .1151694E-01   .1174572E-01   .1198775E-01
   .1087485E-01   .6839224E-02   .2728782E-02   .6077377E-02   .1871369E-01
   .3061692E-01   .2941023E-01   .1468252E-01  -.8702364E-03  -.4825135E-02
   .3611496E-02   .1514289E-01   .2078524E-01   .1887920E-01   .1324951E-01
   .8101466E-02   .5613008E-02   .5644051E-02   .6857047E-02   .8332014E-02
   .9392309E-02   .9156631E-02   .7199214E-02   .5418714E-02   .8070169E-02
   .1643073E-01   .2335090E-01   .1825799E-01  -.3408924E-03  -.2138281E-01
  -.3165268E-01  -.2648677E-01  -.1033082E-01   .9897245E-02   .2864475E-01
   .3868110E-01   .3262721E-01   .1189596E-01  -.1142478E-01  -.2369403E-01
  -.2019665E-01  -.7291481E-02   .5009089E-02   .1061916E-01   .9171389E-02
   .3997444E-02  -.9525536E-03  -.2986907E-02  -.1505700E-02   .1795337E-02
   .4109679E-02   .3525261E-02   .6634812E-03  -.1995060E-02  -.2398798E-02
  -.6315612E-03   .7608581E-03  -.2548468E-03  -.2836919E-02  -.4543448E-02
  -.3328901E-02   .1883597E-03   .3262083E-02   .3841849E-02   .2430954E-02
   .1421502E-02   .2048301E-02   .3467618E-02   .4282863E-02   .4101277E-02
   .3484268E-02   .2816939E-02   .1808628E-02  -.9843178E-04  -.2697544E-02
  -.4892561E-02  -.5656534E-02  -.4961440E-02  -.3912047E-02  -.3573580E-02
  -.3961673E-02  -.4304293E-02  -.3533668E-02  -.1197141E-02   .1937683E-02
   .4736489E-02   .6661862E-02   .8128449E-02   .9821771E-02   .1178401E-01
   .1346342E-01   .1468260E-01   .1569643E-01   .1640645E-01   .1654645E-01
   .1591638E-01   .1462128E-01   .1315668E-01   .1196732E-01   .1116064E-01
   .1046321E-01   .9267310E-02   .7325534E-02   .4880847E-02   .2284719E-02
  -.5586831E-04  -.2140980E-02  -.4257699E-02  -.6561936E-02  -.8697753E-02
  -.1001260E-01  -.1041684E-01  -.1033368E-01  -.1014550E-01  -.9896273E-02
  -.9541690E-02  -.8845174E-02  -.7410582E-02  -.5560422E-02  -.3901768E-02
  -.2792625E-02  -.2701345E-02  -.3581933E-02  -.4859640E-02  -.6213162E-02
  -.7475165E-02  -.8540857E-02  -.9319692E-02  -.9815802E-02  -.1012824E-01
  -.1011329E-01  -.9672524E-02  -.8674244E-02  -.6997018E-02  -.4980811E-02
  -.2973669E-02  -.1171989E-02   .2976295E-03   .1553805E-02   .2811288E-02
   .4133434E-02   .5517700E-02   .6855449E-02   .7702562E-02   .7496627E-02
   .6181983E-02   .4353419E-02   .2524186E-02   .8824888E-03  -.5579014E-03
  -.1862926E-02  -.2926720E-02  -.3715182E-02  -.4326962E-02  -.4519540E-02
  -.3921068E-02  -.2566612E-02  -.9810613E-03   .4587625E-03   .1875793E-02
   .3297775E-02   .4622671E-02   .5794633E-02   .6774504E-02   .7282125E-02
   .7063422E-02   .6357291E-02   .5215004E-02   .3608965E-02   .1795399E-02
  -.3947018E-04  -.1870011E-02  -.3624564E-02  -.4888817E-02  -.5252908E-02
  -.4689769E-02  -.3442668E-02  -.1686918E-02   .5588266E-03   .3046205E-02
   .5431830E-02   .7652384E-02   .9801900E-02   .1172929E-01   .1307580E-01
   .1369554E-01   .1354804E-01   .1271999E-01   .1146614E-01   .9803114E-02
   .7628522E-02   .5011280E-02   .2184582E-02  -.5763430E-03  -.3153429E-02
  -.5468591E-02  -.7486227E-02  -.9139795E-02  -.1037116E-01  -.1139606E-01
  -.1223415E-01  -.1274303E-01  -.1294408E-01  -.1291978E-01  -.1269611E-01
  -.1206554E-01  -.1084556E-01  -.9187824E-02  -.7464863E-02  -.5856203E-02
  -.4335164E-02  -.2995617E-02  -.1927046E-02  -.1039134E-02  -.2493411E-03
   .1593259E-03  -.1038754E-03  -.8649726E-03  -.1666854E-02  -.2053694E-02
  -.2014693E-02  -.1914824E-02  -.2188772E-02  -.3070908E-02  -.4142569E-02
  -.4801225E-02  -.4890026E-02  -.4667348E-02  -.4496518E-02  -.4418533E-02
  -.4077716E-02  -.3337853E-02  -.2476263E-02  -.1660009E-02  -.8378846E-03
   .2549434E-04   .6440662E-03   .8344210E-03   .7752396E-03   .6673132E-03
   .6676879E-03   .6805145E-03   .5235996E-03   .2881525E-03   .4914851E-04
  -.2049096E-03  -.2654592E-03   .7572860E-04   .6575471E-03   .1357471E-02
   .2261557E-02   .3109053E-02   .3588049E-02   .3646491E-02   .3442694E-02
   .3299413E-02   .3288106E-02   .3344557E-02   .3470428E-02   .3483119E-02
   .3081005E-02   .2165665E-02   .7957974E-03  -.1003759E-02  -.3088917E-02
  -.5075047E-02  -.6665048E-02  -.7902057E-02  -.8922156E-02  -.9962024E-02
  -.1111887E-01  -.1198435E-01  -.1211802E-01  -.1149269E-01  -.1054467E-01
  -.9822216E-02  -.9330469E-02  -.8606727E-02  -.7374399E-02  -.5634780E-02
  -.3426976E-02  -.9268999E-03   .1422220E-02   .3301086E-02   .4755373E-02
   .5885972E-02   .6855891E-02   .7832362E-02   .8724509E-02   .9435074E-02
   .9857982E-02   .9780973E-02   .9250417E-02   .8681207E-02   .8455639E-02
   .8715088E-02   .9191532E-02   .9339273E-02   .9058488E-02   .8688155E-02
   .8513159E-02   .8573227E-02   .8738144E-02   .8777287E-02   .8414972E-02
   .7593604E-02   .6612426E-02   .5932017E-02   .5841751E-02   .6275016E-02
   .6877703E-02   .7286070E-02   .7398862E-02   .7419163E-02   .7487026E-02
   .7399618E-02   .6973264E-02   .6357107E-02   .5865569E-02   .5730607E-02
   .5894102E-02   .6020992E-02   .5747705E-02   .4913857E-02   .3852686E-02
   .3188863E-02   .3188637E-02   .3648785E-02   .4056721E-02   .3950376E-02
   .3473877E-02   .3103597E-02   .2940806E-02   .2664664E-02   .2015496E-02
   .9992608E-03  -.3439243E-03  -.2023945E-02  -.3957993E-02  -.5891983E-02
  -.7577713E-02  -.9051281E-02  -.1052005E-01  -.1197502E-01  -.1307408E-01
  -.1346478E-01  -.1304373E-01  -.1195133E-01  -.1069631E-01  -.9771206E-02
  -.9052129E-02  -.8144605E-02  -.6848224E-02  -.5350677E-02  -.4005628E-02
  -.2956930E-02  -.2314537E-02  -.2071358E-02  -.2211552E-02  -.2695061E-02
  -.3216306E-02  -.3496360E-02  -.3507580E-02  -.3396972E-02  -.3209633E-02
  -.2772741E-02  -.1991784E-02  -.1067591E-02  -.3409196E-04   .1216094E-02
   .2400980E-02   .3088976E-02   .3176125E-02   .2959046E-02   .2793749E-02
   .2822918E-02   .3001682E-02   .3144750E-02   .3038269E-02   .2622936E-02
   .2079601E-02   .1724110E-02   .1697034E-02   .1864624E-02   .2074677E-02
   .2291004E-02   .2640711E-02   .3129449E-02   .3582142E-02   .4054539E-02
   .4642176E-02   .5268618E-02   .5788956E-02   .6050806E-02   .6079313E-02
   .6153753E-02   .6525257E-02   .7083533E-02   .7467414E-02   .7528262E-02
   .7549282E-02   .7873064E-02   .8520219E-02   .9283125E-02   .9909475E-02
   .1016719E-01   .9958527E-02   .9420054E-02   .8869201E-02   .8448685E-02
   .7892548E-02   .6790465E-02   .5203031E-02   .3804218E-02   .3049058E-02
   .2732214E-02   .2575876E-02   .2648833E-02   .3001549E-02   .3467974E-02
   .3909915E-02   .4360469E-02   .4914111E-02   .5547695E-02   .6181256E-02
   .6639819E-02   .6632038E-02   .6250178E-02   .5885230E-02   .5621354E-02
   .5319379E-02   .4923993E-02   .4469149E-02   .3975747E-02   .3456365E-02
   .2822076E-02   .1890901E-02   .7511984E-03  -.2080394E-03  -.7526597E-03
  -.1023303E-02  -.1341519E-02  -.1778366E-02  -.2115124E-02  -.2237843E-02
  -.2242232E-02  -.2240820E-02  -.2326550E-02  -.2666928E-02  -.3247008E-02
  -.3890949E-02  -.4625051E-02  -.5528074E-02  -.6278764E-02  -.6299709E-02
  -.5427179E-02  -.4006345E-02  -.2397270E-02  -.7470263E-03   .9782736E-03
   .2832696E-02   .4563414E-02   .5878223E-02   .6859656E-02   .7614220E-02
   .8010412E-02   .7866841E-02   .7027058E-02   .5462225E-02   .3328808E-02
   .7320843E-03  -.2261757E-02  -.5341254E-02  -.8204458E-02  -.1068615E-01
  -.1262298E-01  -.1407883E-01  -.1516095E-01  -.1584349E-01  -.1593300E-01
  -.1526228E-01  -.1402954E-01  -.1249175E-01  -.1087807E-01  -.9464645E-02
  -.8347414E-02  -.7187084E-02  -.5589625E-02  -.3714123E-02  -.1960083E-02
  -.7097575E-03  -.1520164E-03   .2925869E-05   .2345745E-03   .6151901E-03
   .7615416E-03   .4977146E-03   .1064328E-03  -.3198164E-03  -.1029563E-02
  -.2157008E-02  -.3553461E-02  -.4779170E-02  -.5399804E-02  -.5328202E-02
  -.4786220E-02  -.3921548E-02  -.2846140E-02  -.1754716E-02  -.7003223E-03
   .4779766E-03   .1883475E-02   .3366268E-02   .4794451E-02   .6144896E-02
   .7231192E-02   .7860342E-02   .8068869E-02   .7835692E-02   .7167130E-02
   .6311364E-02   .5579393E-02   .4989392E-02   .4214985E-02   .3058417E-02
   .1588067E-02   .4623859E-04  -.1319596E-02  -.2473946E-02  -.3520783E-02
  -.4725052E-02  -.6348432E-02  -.8293175E-02  -.1025852E-01  -.1206900E-01
  -.1378037E-01  -.1548170E-01  -.1721567E-01  -.1902753E-01  -.2068570E-01
  -.2199384E-01  -.2308748E-01  -.2391271E-01  -.2430304E-01  -.2429152E-01
  -.2394578E-01  -.2328490E-01  -.2234937E-01  -.2117438E-01  -.1965024E-01
  -.1772154E-01  -.1556771E-01  -.1352832E-01  -.1187112E-01  -.1070261E-01
  -.9838927E-02  -.8932776E-02  -.7836597E-02  -.6625842E-02  -.5680510E-02
  -.5196143E-02  -.4793434E-02  -.4081350E-02  -.3082837E-02  -.1914006E-02
  -.4952152E-03   .1121184E-02   .2674563E-02   .4116888E-02   .5596726E-02
   .7055033E-02   .8304377E-02   .9320910E-02   .1005921E-01   .1058989E-01
   .1127729E-01   .1221785E-01   .1302789E-01   .1323257E-01   .1265471E-01
   .1158796E-01   .1062081E-01   .1022144E-01   .1038214E-01   .1071246E-01
   .1087771E-01   .1082359E-01   .1065713E-01   .1043469E-01   .1002755E-01
   .9380187E-02   .8639870E-02   .8069735E-02   .7825364E-02   .7532066E-02
   .6814818E-02   .5801255E-02   .4730700E-02   .3706030E-02   .2862758E-02
   .2457310E-02   .2476387E-02   .2591629E-02   .2717072E-02   .3126563E-02
   .3960452E-02   .4962365E-02   .5932161E-02   .6872691E-02   .7657702E-02
   .8263172E-02   .8862703E-02   .9468576E-02   .9883220E-02   .9906295E-02
   .9547662E-02   .8759748E-02   .7390099E-02   .5582271E-02   .3745824E-02
   .2162124E-02   .7303764E-03  -.7105620E-03  -.2229806E-02  -.3843132E-02
  -.5347307E-02  -.6253946E-02  -.6276103E-02  -.5656381E-02  -.4688847E-02
  -.3664384E-02  -.2865279E-02  -.2051636E-02  -.8066444E-03   .8065485E-03
   .2444002E-02   .3799608E-02   .4753716E-02   .5448796E-02   .6181782E-02
   .7011301E-02   .7587834E-02   .7607500E-02   .7034589E-02   .5940824E-02
   .4559300E-02   .3185927E-02   .1807058E-02   .2248818E-03  -.1626721E-02
  -.3678022E-02  -.5714485E-02  -.7576067E-02  -.9380255E-02  -.1116029E-01
  -.1266949E-01  -.1384632E-01  -.1488759E-01  -.1578852E-01  -.1632471E-01
  -.1661935E-01  -.1710877E-01  -.1775121E-01  -.1799877E-01  -.1747587E-01
  -.1639579E-01  -.1536096E-01  -.1458333E-01  -.1363770E-01  -.1216809E-01
  -.1028287E-01  -.8303827E-02  -.6396580E-02  -.4635207E-02  -.3102342E-02
  -.1781858E-02  -.6358581E-03   .4438659E-03   .1494252E-02   .2360118E-02
   .3011891E-02   .3679457E-02   .4440531E-02   .5033498E-02   .5245005E-02
   .5176200E-02   .5126806E-02   .5392073E-02   .6048754E-02   .6867472E-02
   .7611283E-02   .8311291E-02   .9106843E-02   .9917876E-02   .1044393E-01
   .1062213E-01   .1081488E-01   .1144734E-01   .1242670E-01   .1322136E-01
   .1363518E-01   .1400702E-01   .1470340E-01   .1550239E-01   .1593755E-01
   .1583052E-01   .1529897E-01   .1466012E-01   .1390580E-01   .1259036E-01
   .1058826E-01   .8392868E-02   .6416398E-02   .4647013E-02   .2887046E-02
   .1158097E-02  -.2861358E-03  -.1415786E-02  -.2313122E-02  -.2957890E-02
  -.3366973E-02  -.3576712E-02  -.3521772E-02  -.3295478E-02  -.3068665E-02
  -.2690606E-02  -.1958310E-02  -.1129415E-02  -.8960958E-03  -.1590006E-02
  -.2695385E-02  -.3439788E-02  -.3605061E-02  -.3684211E-02  -.4213530E-02
  -.5094507E-02  -.5900717E-02  -.6459198E-02  -.6712802E-02  -.6523157E-02
  -.5881914E-02  -.4959911E-02  -.3964428E-02  -.3075163E-02  -.2302567E-02
  -.1468720E-02  -.4301332E-03   .8311772E-03   .2271611E-02   .3717907E-02
   .4785508E-02   .5382985E-02   .5920055E-02   .6614359E-02   .7053133E-02
   .6700812E-02   .5698751E-02   .4657085E-02   .3775754E-02   .2799482E-02
   .1634333E-02   .4234266E-03  -.8090728E-03  -.2194355E-02  -.3705784E-02
  -.5086696E-02  -.6175784E-02  -.7125014E-02  -.8223603E-02  -.9540796E-02
  -.1073282E-01  -.1129427E-01  -.1099959E-01  -.1002986E-01  -.8913356E-02
  -.8211644E-02  -.7845253E-02  -.7239331E-02  -.6194365E-02  -.5065793E-02
  -.4304066E-02  -.3923688E-02  -.3608908E-02  -.3322584E-02  -.3177269E-02
  -.3124514E-02  -.3141259E-02  -.3198043E-02  -.3206737E-02  -.3147111E-02
  -.3067343E-02  -.3004324E-02  -.2839349E-02  -.2302972E-02  -.1390022E-02
  -.5541691E-03  -.1391365E-03   .1402348E-03   .7736315E-03   .1698786E-02
   .2411571E-02   .2577552E-02   .2215052E-02   .1542481E-02   .7123715E-03
  -.3753657E-03  -.1739715E-02  -.3074321E-02  -.4224142E-02  -.5333160E-02
  -.6540807E-02  -.7697310E-02  -.8437216E-02  -.8649000E-02  -.8546395E-02
  -.8324310E-02  -.7825833E-02  -.6853384E-02  -.5483407E-02  -.3825902E-02
  -.2020235E-02  -.1643682E-03   .1683755E-02   .3435094E-02   .5164699E-02
   .6939669E-02   .8642905E-02   .1004608E-01   .1101606E-01   .1175041E-01
   .1266263E-01   .1385679E-01   .1488580E-01   .1535386E-01   .1531487E-01
   .1508152E-01   .1493785E-01   .1483880E-01   .1445386E-01   .1362535E-01
   .1251639E-01   .1140099E-01   .1041973E-01   .9447357E-02   .8378890E-02
   .7251702E-02   .6110449E-02   .4926081E-02   .3593538E-02   .2112720E-02
   .6433891E-03  -.5286221E-03  -.1188169E-02  -.1557590E-02  -.2099141E-02
  -.3017183E-02  -.4116201E-02  -.5051354E-02  -.5771667E-02  -.6332664E-02
  -.6680957E-02  -.6776624E-02  -.6470924E-02  -.5736261E-02  -.4817429E-02
  -.3939179E-02  -.3126354E-02  -.2318693E-02  -.1464046E-02  -.5236281E-03
   .4213896E-03   .1144029E-02   .1382697E-02   .1145876E-02   .7318738E-03
   .3055909E-03  -.2993636E-03  -.1166627E-02  -.2027936E-02  -.2812771E-02
  -.3663833E-02  -.4437910E-02  -.4901523E-02  -.5102920E-02  -.5374400E-02
  -.5857820E-02  -.6300784E-02  -.6488627E-02  -.6322820E-02  -.5683615E-02
  -.4591222E-02  -.3337567E-02  -.2312297E-02  -.1541782E-02  -.8127963E-03
  -.2103253E-03   .7033193E-04   .1193487E-03   .1816059E-03   .3496394E-03
   .4488740E-03   .3175784E-03   .1329075E-03   .1955106E-03   .4487700E-03
   .6116136E-03   .8564428E-03   .1525244E-02   .2381990E-02   .2925737E-02
   .2939243E-02   .2418952E-02   .1495646E-02   .5223320E-03  -.1382510E-03
  -.5653688E-03  -.1174146E-02  -.2045840E-02  -.2790197E-02  -.3099920E-02
  -.3039994E-02  -.2776400E-02  -.2313106E-02  -.1576417E-02  -.7570449E-03
  -.2498036E-03  -.2249700E-05   .5154631E-03   .1453297E-02   .2329758E-02
   .2703972E-02   .2498990E-02   .1747291E-02   .5839006E-03  -.7609380E-03
  -.2234258E-02  -.3902961E-02  -.5672742E-02  -.7237784E-02  -.8418813E-02
  -.9415492E-02  -.1042963E-01  -.1141909E-01  -.1214505E-01  -.1228718E-01
  -.1177410E-01  -.1074345E-01  -.9327096E-02  -.7697923E-02  -.5987592E-02
  -.4348524E-02  -.2872191E-02  -.1383521E-02   .1753311E-03   .1626219E-02
   .2893352E-02   .3963631E-02   .4599078E-02   .4673713E-02   .4367101E-02
   .3775029E-02   .3048776E-02   .2390173E-02   .1699236E-02   .8220100E-03
  -.1787085E-03  -.1234957E-02  -.2275463E-02  -.3105079E-02  -.3655964E-02
  -.4112442E-02  -.4660357E-02  -.5278193E-02  -.5751771E-02  -.5913882E-02
  -.5843456E-02  -.5741839E-02  -.5628935E-02  -.5423005E-02  -.5279509E-02
  -.5376084E-02  -.5620688E-02  -.5798028E-02  -.5724842E-02  -.5413828E-02
  -.5178535E-02  -.5288288E-02  -.5638927E-02  -.5847888E-02  -.5689329E-02
  -.5303136E-02  -.4802558E-02  -.4145373E-02  -.3360237E-02  -.2487076E-02
  -.1432098E-02  -.5173733E-04   .1723120E-02   .3762374E-02   .5757785E-02
   .7472977E-02   .8872554E-02   .1001100E-01   .1075026E-01   .1092293E-01
   .1071230E-01   .1039394E-01   .9950199E-02   .9210078E-02   .8324022E-02
   .7574629E-02   .6886910E-02   .6130360E-02   .5471648E-02   .5114692E-02
   .5056861E-02   .5120009E-02   .5160299E-02   .5320756E-02   .5871628E-02
   .6749828E-02   .7484654E-02   .7696706E-02   .7351579E-02   .6639663E-02
   .5833395E-02   .5046370E-02   .4149927E-02   .3121995E-02   .2178884E-02
   .1325980E-02   .3297392E-03  -.9243548E-03  -.2367402E-02  -.3816513E-02
  -.5046499E-02  -.5931458E-02  -.6660637E-02  -.7407058E-02  -.7860165E-02
  -.7831529E-02  -.7654617E-02  -.7471929E-02  -.7057989E-02  -.6435695E-02
  -.5938238E-02  -.5677518E-02  -.5361811E-02  -.4663307E-02  -.3576532E-02
  -.2390530E-02  -.1440990E-02  -.7844773E-03  -.1900989E-03   .4210742E-03
   .9727957E-03   .1499590E-02   .1992103E-02   .2312512E-02   .2408370E-02
   .2375718E-02   .2324591E-02   .2324269E-02   .2383709E-02   .2429847E-02
   .2427805E-02   .2405515E-02   .2381418E-02   .2361382E-02   .2345638E-02
   .2343273E-02   .2337447E-02   .2319974E-02   .2309972E-02   .2300922E-02
   .2295504E-02   .2235807E-02   .1817601E-02   .8821941E-03  -.1579980E-03
  -.9447526E-03  -.1600169E-02  -.2320240E-02  -.3161621E-02  -.4117453E-02
  -.5124052E-02  -.6018830E-02  -.6719371E-02  -.7337587E-02  -.7940091E-02
  -.8360786E-02  -.8325919E-02  -.7789864E-02  -.6989919E-02  -.6258494E-02
  -.5824730E-02  -.5552614E-02  -.5152313E-02  -.4524061E-02  -.3724868E-02
  -.2855863E-02  -.1970973E-02  -.1096858E-02  -.2023047E-03   .8356687E-03
   .2101310E-02   .3620814E-02   .5292575E-02   .6820224E-02   .7937225E-02
   .8642648E-02   .9163684E-02   .9660194E-02   .1007606E-01   .1028954E-01
   .1024127E-01   .9788632E-02   .8877296E-02   .7794942E-02   .6804733E-02
   .5940157E-02   .5071523E-02   .4031627E-02   .2954412E-02   .2231972E-02
   .2046771E-02   .2335778E-02   .3009297E-02   .3900914E-02   .4820187E-02
   .5718893E-02   .6567391E-02   .7194946E-02   .7448256E-02   .7381997E-02
   .7132283E-02   .6817738E-02   .6455399E-02   .5909086E-02   .5250554E-02
   .4725345E-02   .4260104E-02   .3544830E-02   .2590383E-02   .1514909E-02
   .1905173E-03  -.1324583E-02  -.2657895E-02  -.3586180E-02  -.4314003E-02
  -.5051716E-02  -.5678762E-02  -.6003289E-02  -.5943075E-02  -.5395218E-02
  -.4305839E-02  -.2865592E-02  -.1388331E-02  -.1347680E-03   .9197589E-03
   .1961521E-02   .2926496E-02   .3629794E-02   .4104124E-02   .4468488E-02
   .4578853E-02   .4179374E-02   .3271443E-02   .2256121E-02   .1512020E-02
   .7760288E-03  -.4353347E-03  -.2107311E-02  -.3828122E-02  -.5232429E-02
  -.6273186E-02  -.7123886E-02  -.7694484E-02  -.7555824E-02  -.6702916E-02
  -.5652690E-02  -.4673369E-02  -.3658890E-02  -.2377939E-02  -.7284094E-03
   .9543961E-03   .2206553E-02   .3040489E-02   .3762177E-02   .4436057E-02
   .4896244E-02   .5038603E-02   .4976100E-02   .4893824E-02   .4897685E-02
   .4935664E-02   .4715618E-02   .3887805E-02   .2457744E-02   .8770408E-03
  -.3240440E-03  -.1060896E-02  -.1741765E-02  -.2517368E-02  -.3102920E-02
  -.3327860E-02  -.3283468E-02  -.3179642E-02  -.3144128E-02  -.3017847E-02
  -.2459146E-02  -.1311782E-02   .2283546E-03   .1735454E-02   .2864158E-02
   .3589751E-02   .4101794E-02   .4697888E-02   .5591716E-02   .6623334E-02
   .7409316E-02   .7659461E-02   .7299255E-02   .6438060E-02   .5419879E-02
   .4769402E-02   .4684135E-02   .4908495E-02   .5120873E-02   .5007494E-02
   .4322341E-02   .3156884E-02   .1867674E-02   .7515514E-03  -.2033910E-04
  -.5027784E-03  -.1090105E-02  -.2086547E-02  -.3388789E-02  -.4761663E-02
  -.6094405E-02  -.7370022E-02  -.8634052E-02  -.9873996E-02  -.1085995E-01
  -.1133474E-01  -.1135075E-01  -.1114138E-01  -.1067805E-01  -.9797313E-02
  -.8494390E-02  -.6851731E-02  -.4996677E-02  -.3160988E-02  -.1666086E-02
  -.6851374E-03   .2361064E-04   .7975339E-03   .1595660E-02   .2254497E-02
   .2763578E-02   .3149435E-02   .3384113E-02   .3340465E-02   .2935238E-02
   .2372167E-02   .1909389E-02   .1616368E-02   .1510020E-02   .1578764E-02
   .1796590E-02   .2048130E-02   .2089374E-02   .1861077E-02   .1677589E-02
   .1656555E-02   .1467954E-02   .9239374E-03   .1669845E-03  -.4920100E-03
  -.8892519E-03  -.1051237E-02  -.1142506E-02  -.1540988E-02  -.2318345E-02
  -.3019232E-02  -.3163412E-02  -.2836808E-02  -.2591532E-02  -.2723796E-02
  -.3008320E-02  -.3040309E-02  -.2740084E-02  -.2168406E-02  -.1368565E-02
  -.6794336E-03  -.4059637E-03  -.4947950E-03  -.6183831E-03  -.4716337E-03
  -.1108074E-03   .3289673E-03   .8256662E-03   .1200288E-02   .1238935E-02
   .1078676E-02   .1150302E-02   .1595890E-02   .2101184E-02   .2362892E-02
   .2338744E-02   .2179821E-02   .2113794E-02   .2210928E-02   .2320646E-02
   .2384955E-02   .2402801E-02   .2344722E-02   .2304219E-02   .2320992E-02
   .2327150E-02   .2327299E-02   .2324822E-02   .2178340E-02   .1649952E-02
   .6120398E-03  -.7701225E-03  -.2095315E-02  -.3076256E-02  -.3875697E-02
  -.4698733E-02  -.5398159E-02  -.5757025E-02  -.5666564E-02  -.5137934E-02
  -.4397440E-02  -.3694547E-02  -.3192987E-02  -.3038928E-02  -.3119532E-02
  -.3191001E-02  -.3028085E-02  -.2653073E-02  -.2735606E-02  -.3798266E-02
  -.5276426E-02  -.6239849E-02  -.6555709E-02  -.6841089E-02  -.7527719E-02
  -.8327113E-02  -.8805264E-02  -.9044695E-02  -.9317375E-02  -.9447667E-02
  -.8999374E-02  -.7817438E-02  -.6134153E-02  -.4249936E-02  -.2372262E-02
  -.6659211E-03   .9890411E-03   .2809524E-02   .4832452E-02   .6899686E-02
   .8720253E-02   .1019999E-01   .1139966E-01   .1230173E-01   .1266264E-01
   .1215326E-01   .1088314E-01   .9259376E-02   .7580135E-02   .6066805E-02
   .4751750E-02   .3505012E-02   .2204941E-02   .8902216E-03  -.1357555E-03
  -.6283369E-03  -.6514885E-03  -.5079871E-03  -.4340559E-03  -.2547993E-03
   .2486803E-03   .9592492E-03   .1600198E-02   .1945552E-02   .2064391E-02
   .2278318E-02   .2717191E-02   .3043677E-02   .2957708E-02   .2655337E-02
   .2403884E-02   .2228685E-02   .2131476E-02   .2139078E-02   .2015998E-02
   .1431520E-02   .3018609E-03  -.1179591E-02  -.2683474E-02  -.4004047E-02
  -.5105097E-02  -.6143498E-02  -.7238755E-02  -.8187473E-02  -.8682229E-02
  -.8665919E-02  -.8272821E-02  -.7542317E-02  -.6595669E-02  -.5558385E-02
  -.4426843E-02  -.3326222E-02  -.2192249E-02  -.7293958E-03   .1141874E-02
   .3151721E-02   .4854211E-02   .6095202E-02   .6925130E-02   .7341166E-02
   .7445981E-02   .7462819E-02   .7703161E-02   .8173290E-02   .8461647E-02
   .8390822E-02   .8059776E-02   .7644495E-02   .7280823E-02   .6892140E-02
   .6375138E-02   .5737124E-02   .5129541E-02   .4767356E-02   .4626200E-02
   .4305145E-02   .3539993E-02   .2588816E-02   .1966095E-02   .1871047E-02
   .2062141E-02   .2244409E-02   .2245209E-02   .2103511E-02   .1988717E-02
   .1967155E-02   .2016867E-02   .2081532E-02   .2083989E-02   .2060044E-02
   .2077095E-02   .2058457E-02   .1706888E-02   .8649565E-03  -.1343359E-03
  -.7839908E-03  -.8882056E-03  -.7950001E-03  -.8738949E-03  -.1120286E-02
  -.1434482E-02  -.1617006E-02  -.1619430E-02  -.1769700E-02  -.2143732E-02
  -.2411639E-02  -.2511377E-02  -.2705125E-02  -.3037992E-02  -.3295230E-02
  -.3357907E-02  -.3327469E-02  -.3442701E-02  -.3901476E-02  -.4639184E-02
  -.5385585E-02  -.6010890E-02  -.6680615E-02  -.7506373E-02  -.8297282E-02
  -.8639499E-02  -.8270463E-02  -.7345026E-02  -.6267272E-02  -.5338612E-02
  -.4537447E-02  -.3831012E-02  -.3332172E-02  -.3060572E-02  -.2716681E-02
  -.1983452E-02  -.1042148E-02  -.3977226E-03  -.2720814E-03  -.3422474E-03
  -.8973210E-04   .7280734E-03   .1800273E-02   .2509024E-02   .2804962E-02
   .3279782E-02   .4021322E-02   .4569818E-02   .4783109E-02   .4727318E-02
   .4300238E-02   .3496997E-02   .2642377E-02   .1933750E-02   .1178489E-02
   .1950610E-03  -.9535646E-03  -.2075254E-02  -.2940639E-02  -.3586076E-02
  -.4353084E-02  -.5248852E-02  -.5869464E-02  -.6043242E-02  -.5901444E-02
  -.5558012E-02  -.5108335E-02  -.4687504E-02  -.4441322E-02  -.4246970E-02
  -.3886369E-02  -.3465517E-02  -.3137225E-02  -.2825004E-02  -.2245803E-02
  -.1385331E-02  -.7790849E-03  -.7420408E-03  -.8913680E-03  -.8161834E-03
  -.5719254E-03  -.3735263E-03  -.3044712E-03  -.3328816E-03  -.3911146E-03
  -.4240011E-03  -.4139104E-03  -.3920812E-03  -.3805871E-03  -.3425300E-03
  -.6284121E-04   .6646024E-03   .1601553E-02   .2320559E-02   .2750270E-02
   .3154952E-02   .3641252E-02   .3863337E-02   .3464950E-02   .2644073E-02
   .1991461E-02   .1849463E-02   .1980915E-02   .1818194E-02   .1026288E-02
  -.2378712E-04  -.7038051E-03  -.8088769E-03  -.5504038E-03  -.3101250E-03
  -.2749074E-03  -.2757276E-03   .7555258E-04   .9521147E-03   .1912403E-02
   .2414503E-02   .2419930E-02   .2167048E-02   .1993455E-02   .2043135E-02
   .2018200E-02   .1599613E-02   .7233775E-03  -.2593428E-03  -.8910754E-03
  -.1148649E-02  -.1353836E-02  -.1837403E-02  -.2475782E-02  -.2719331E-02
  -.2258718E-02  -.1382294E-02  -.6272147E-03  -.1755119E-03   .2879887E-03
   .1043300E-02   .1943184E-02   .2696675E-02   .3167417E-02   .3495830E-02
   .3996108E-02   .4695454E-02   .5273335E-02   .5411269E-02   .5052966E-02
   .4473185E-02   .4071763E-02   .4148465E-02   .4531224E-02   .4506424E-02
   .3643233E-02   .2472114E-02   .1819554E-02   .1814383E-02   .2087979E-02
   .2127128E-02   .1657757E-02   .1167645E-02   .1192331E-02   .1638499E-02
   .2156430E-02   .2462379E-02   .2728869E-02   .3371626E-02   .4226112E-02
   .4869056E-02   .5033319E-02   .4752960E-02   .4584566E-02   .4984946E-02
   .5644362E-02   .5907562E-02   .5709224E-02   .5384042E-02   .5056125E-02
   .4836709E-02   .4756787E-02   .4481558E-02   .3771588E-02   .2848801E-02
   .2182588E-02   .2018687E-02   .2166963E-02   .2258251E-02   .1887162E-02
   .9503487E-03  -.1030177E-03  -.7014298E-03  -.7153078E-03  -.4439548E-03
  -.2586660E-03  -.2899807E-03  -.4111272E-03  -.5569394E-03  -.6174857E-03
  -.5508400E-03  -.4985937E-03  -.4736737E-03  -.4764270E-03  -.5043142E-03
  -.5315259E-03  -.5488643E-03  -.5297644E-03  -.5068803E-03  -.5128829E-03
  -.5226906E-03  -.5081794E-03  -.6079014E-03  -.1129148E-02  -.2040843E-02
  -.2900338E-02  -.3348084E-02  -.3334098E-02  -.3218609E-02  -.3449517E-02
  -.4120642E-02  -.5019675E-02  -.5659170E-02  -.5668843E-02  -.5291030E-02
  -.4801621E-02  -.4250151E-02  -.3853552E-02  -.3546284E-02  -.2850073E-02
  -.1601817E-02  -.1757550E-03   .1096840E-02   .2183459E-02   .3159179E-02
   .4170425E-02   .5178109E-02   .6080579E-02   .6808368E-02   .7118250E-02
   .6911767E-02   .6408953E-02   .5867193E-02   .5423746E-02   .5094619E-02
   .4719964E-02   .4114443E-02   .3268307E-02   .2445205E-02   .2048154E-02
   .2115437E-02   .2341406E-02   .2475771E-02   .2447879E-02   .2527118E-02
   .3067970E-02   .4032958E-02   .4892701E-02   .5226692E-02   .5134063E-02
   .4826303E-02   .4305075E-02   .3469480E-02   .2557765E-02   .1693835E-02
   .7719308E-03  -.3746511E-04  -.6692623E-03  -.1370490E-02  -.2235907E-02
  -.2971640E-02  -.3463968E-02  -.3845727E-02  -.4218303E-02  -.4676517E-02
  -.5174509E-02  -.5438372E-02  -.5223224E-02  -.4661591E-02  -.4033225E-02
  -.3519580E-02  -.3201614E-02  -.3067897E-02  -.3068282E-02  -.3133735E-02
  -.3139346E-02  -.3042673E-02  -.3018995E-02  -.3273243E-02  -.3872430E-02
  -.4643266E-02  -.5342671E-02  -.5784358E-02  -.5862776E-02  -.5726371E-02
  -.5637398E-02  -.5691070E-02  -.5810650E-02  -.5885606E-02  -.5899330E-02
  -.5882674E-02  -.5845208E-02  -.5830443E-02  -.5847559E-02  -.5867646E-02
  -.5794046E-02  -.5496345E-02  -.4930428E-02  -.4229912E-02  -.3712853E-02
  -.3499558E-02  -.3390513E-02  -.3229438E-02  -.3098469E-02  -.3062201E-02
  -.2976670E-02  -.2677418E-02  -.2221204E-02  -.1835449E-02  -.1682271E-02
  -.1883538E-02  -.2165447E-02  -.2194004E-02  -.2183102E-02  -.2427035E-02
  -.2879795E-02  -.3221701E-02  -.3292317E-02  -.3077180E-02  -.2538925E-02
  -.1770713E-02  -.1123781E-02  -.8007338E-03  -.6512789E-03  -.5353349E-03
  -.4113891E-03  -.3344103E-03  -.4377204E-03  -.9402669E-03  -.1854690E-02
  -.2834010E-02  -.3645195E-02  -.4275820E-02  -.4913850E-02  -.5914893E-02
  -.7162356E-02  -.8136799E-02  -.8600184E-02  -.8569593E-02  -.8328081E-02
  -.8252227E-02  -.8121341E-02  -.7379307E-02  -.5906455E-02  -.4119922E-02
  -.2642217E-02  -.1721290E-02  -.1114931E-02  -.4489609E-03   .4711620E-03
   .1394663E-02   .2046086E-02   .2388285E-02   .2359120E-02   .2012688E-02
   .1504709E-02   .8824666E-03   .2346674E-03  -.2390792E-03  -.4236834E-03
  -.3941514E-03  -.3183341E-03  -.3123988E-03  -.3749835E-03  -.4442263E-03
  -.4804800E-03  -.4786741E-03  -.4198054E-03  -.2357567E-03   .1649214E-03
   .8393112E-03   .1584834E-02   .2114051E-02   .2334894E-02   .2440929E-02
   .2592987E-02   .2791857E-02   .3258570E-02   .3818777E-02   .3883003E-02
   .3260936E-02   .2386794E-02   .1917212E-02   .1897429E-02   .1731166E-02
   .9998726E-03  -.2914654E-04  -.7159883E-03  -.7877609E-03  -.5162185E-03
  -.2876793E-03  -.2695851E-03  -.4145014E-03  -.5106909E-03  -.3090880E-03
   .2030667E-03   .7420404E-03   .1039446E-02   .1251940E-02   .1560600E-02
   .1789839E-02   .1806693E-02   .1804709E-02   .1983240E-02   .2216566E-02
   .2322678E-02   .2345471E-02   .2564217E-02   .3275253E-02   .4246301E-02
   .4909710E-02   .5074758E-02   .4892866E-02   .4685531E-02   .4654189E-02
   .4734714E-02   .4868874E-02   .4934681E-02   .4758968E-02   .4171650E-02
   .3182077E-02   .2201511E-02   .1475623E-02   .8427701E-03   .1704263E-03
  -.4102427E-03  -.6398970E-03  -.5844194E-03  -.4410418E-03  -.2355856E-03
  -.4623600E-04   .2062008E-03   .7169341E-03   .1564745E-02   .2597569E-02
   .3590358E-02   .4588818E-02   .5642770E-02   .6625767E-02   .7378626E-02
   .7837783E-02   .7975219E-02   .7734227E-02   .7225458E-02   .6509532E-02
   .5594960E-02   .4713736E-02   .3866808E-02   .2788727E-02   .1421904E-02
   .1101344E-03  -.7428361E-03  -.1183758E-02  -.1454859E-02  -.1688019E-02
  -.1786630E-02  -.1512216E-02  -.9654990E-03  -.5349337E-03  -.3828809E-03
  -.3549450E-03  -.2428581E-03  -.8544057E-05   .1571459E-03   .1064664E-03
  -.1677730E-03  -.4613202E-03  -.5716111E-03  -.5054308E-03  -.3932086E-03
  -.3412726E-03  -.3316319E-03  -.4117118E-03  -.5930907E-03  -.9481394E-03
  -.1479895E-02  -.1891281E-02  -.1979529E-02  -.1851374E-02  -.1632520E-02
  -.1359488E-02  -.1180666E-02  -.1147430E-02  -.1168945E-02  -.1255033E-02
  -.1377983E-02  -.1401859E-02  -.1193434E-02  -.7822430E-03  -.4378184E-03
  -.3408860E-03  -.4235648E-03  -.5341254E-03  -.3798775E-03   .2143346E-03
   .1054553E-02   .1684646E-02   .1889459E-02   .1937042E-02   .2020777E-02
   .2092291E-02   .2121848E-02   .2187828E-02   .2204626E-02   .2135315E-02
   .1975507E-02   .1529321E-02   .8237954E-03   .6358637E-04  -.4474093E-03
  -.6332424E-03  -.8374042E-03  -.1392619E-02  -.2302024E-02  -.2942437E-02
  -.2849014E-02  -.2405755E-02  -.2134375E-02  -.1909374E-02  -.1379297E-02
  -.7927475E-03  -.4665161E-03  -.4405356E-03  -.6131698E-03  -.6816707E-03
  -.6113688E-03  -.5749915E-03  -.5614674E-03  -.9446319E-03  -.1937851E-02
  -.2885129E-02  -.3194067E-02  -.2774704E-02  -.2232945E-02  -.2309615E-02
  -.2850414E-02  -.3312262E-02  -.3386194E-02  -.3035257E-02  -.2627032E-02
  -.2424342E-02  -.2267222E-02  -.1957060E-02  -.1634373E-02  -.1674619E-02
  -.2094304E-02  -.2688771E-02  -.3180832E-02  -.3292941E-02  -.3164346E-02
  -.3108997E-02  -.3399298E-02  -.4164675E-02  -.5065739E-02  -.5531228E-02
  -.5592910E-02  -.5674169E-02  -.5750392E-02  -.5773230E-02  -.5645609E-02
  -.5070256E-02  -.4089316E-02  -.3020238E-02  -.2118107E-02  -.1228202E-02
  -.2275092E-03   .7945534E-03   .1782922E-02   .2652006E-02   .3550997E-02
   .4370864E-02   .4830464E-02   .4957540E-02   .4774447E-02   .4247083E-02
   .3502834E-02   .2880862E-02   .2585499E-02   .2363481E-02   .1871020E-02
   .1120061E-02   .2961276E-03  -.3316922E-03  -.5903000E-03  -.5511467E-03
  -.4190412E-03  -.3986628E-03  -.4830220E-03  -.4528887E-03  -.3052016E-04
   .8448089E-03   .1805907E-02   .2437252E-02   .2753595E-02   .3129687E-02
   .3634418E-02   .3902253E-02   .3805710E-02   .3395917E-02   .2846814E-02
   .2366339E-02   .1804679E-02   .9786159E-03   .4751477E-04  -.6982430E-03
  -.1372917E-02  -.2142840E-02  -.2802086E-02  -.3019071E-02  -.2592006E-02
  -.1816627E-02  -.1073823E-02  -.4806545E-03  -.1688988E-03   .2204595E-03
   .1111046E-02   .2131892E-02   .3074697E-02   .4072151E-02   .5016407E-02
   .5826962E-02   .6444199E-02   .6619313E-02   .6336877E-02   .6060248E-02
   .5967518E-02   .5843461E-02   .5564334E-02   .5116263E-02   .4552548E-02
   .3825390E-02   .2977997E-02   .2303363E-02   .2050328E-02   .2167722E-02
   .2329807E-02   .2346443E-02   .2236598E-02   .2227343E-02   .2730557E-02
   .3735169E-02   .4680540E-02   .5152832E-02   .5388204E-02   .5751334E-02
   .6281449E-02   .6820615E-02   .7133587E-02   .7100195E-02   .6917846E-02
   .6878887E-02   .6884284E-02   .6701931E-02   .6278975E-02   .5786560E-02
   .5649777E-02   .6087431E-02   .6663122E-02   .6689038E-02   .6227399E-02
   .5992566E-02   .6078022E-02   .6012735E-02   .5617872E-02   .5131319E-02
   .4874099E-02   .4874564E-02   .5016502E-02   .5137481E-02   .5137608E-02
   .5041639E-02   .4974965E-02   .5150084E-02   .5685457E-02   .6437693E-02
   .6957629E-02   .6868803E-02   .6278729E-02   .5618706E-02   .5102824E-02
   .4857769E-02   .4730614E-02   .4116803E-02   .3065490E-02   .2245267E-02
   .1760855E-02   .1199207E-02   .3860667E-03  -.3488179E-03  -.5899904E-03
  -.4742155E-03  -.3412903E-03  -.3050854E-03  -.4088856E-03  -.6608244E-03
  -.9657168E-03  -.1094551E-02  -.1174210E-02  -.1700494E-02  -.2579928E-02
  -.3281479E-02  -.3659021E-02  -.4054193E-02  -.4834004E-02  -.5663779E-02
  -.6270191E-02  -.6966161E-02  -.7764369E-02  -.8377709E-02  -.8670425E-02
  -.8672450E-02  -.8499571E-02  -.8369238E-02  -.8268394E-02  -.7861951E-02
  -.7130159E-02  -.6375266E-02  -.5758515E-02  -.5110549E-02  -.4238328E-02
  -.3420527E-02  -.2962331E-02  -.2775309E-02  -.2726225E-02  -.2851118E-02
  -.3043780E-02  -.3125788E-02  -.3144566E-02  -.3098588E-02  -.3023111E-02
  -.3028140E-02  -.3068767E-02  -.3121986E-02  -.3215652E-02  -.3451183E-02
  -.3669275E-02  -.3527778E-02  -.3216674E-02  -.3049095E-02  -.3022364E-02
  -.3101809E-02  -.3214583E-02  -.3245012E-02  -.3171972E-02  -.3121507E-02
  -.3120309E-02  -.3071065E-02  -.3099891E-02  -.3159519E-02  -.3117797E-02
  -.2921631E-02  -.2400724E-02  -.1526166E-02  -.5920119E-03  -.1192892E-03
  -.1073350E-04   .3206916E-03   .9715385E-03   .1616309E-02   .2017067E-02
   .2181606E-02   .2261974E-02   .2257062E-02   .2069305E-02   .1654169E-02
   .1132229E-02   .8042166E-03   .5589529E-03   .2121527E-03  -.1726031E-03
  -.4568734E-03  -.5065925E-03  -.3946757E-03  -.3105252E-03  -.3706253E-03
  -.4482599E-03  -.4519369E-03  -.4252709E-03  -.3911618E-03  -.3727290E-03
  -.3404076E-03  -.3334698E-03  -.3666497E-03  -.3303130E-03  -.2883160E-03
  -.3733116E-03  -.5699679E-03  -.7474346E-03  -.7415785E-03  -.6080869E-03
  -.6745837E-03  -.1031140E-02  -.1387051E-02  -.1596936E-02  -.1574521E-02
  -.1451889E-02  -.1741706E-02  -.2354982E-02  -.2707992E-02  -.2667094E-02
  -.2329154E-02  -.1746506E-02  -.1116179E-02  -.6256320E-03  -.3832861E-03
  -.4122110E-03  -.4934733E-03  -.3180284E-03   .2713040E-03   .1260667E-02
   .2232105E-02   .2598602E-02   .2449475E-02   .2209412E-02   .2109569E-02
   .2191276E-02   .2343176E-02   .2449625E-02   .2357260E-02   .1858799E-02
   .8833655E-03  -.1739208E-03  -.8382489E-03  -.1069399E-02  -.1094241E-02
  -.1382861E-02  -.2120929E-02  -.2753765E-02  -.2924831E-02  -.2893197E-02
  -.2950627E-02  -.3092042E-02  -.3222873E-02  -.3306935E-02  -.3293496E-02
  -.3271957E-02  -.3300745E-02  -.3224371E-02  -.2898748E-02  -.2305364E-02
  -.1598090E-02  -.9450778E-03  -.3997604E-03   .2046785E-03   .1060373E-02
   .1813707E-02   .2053979E-02   .1935757E-02   .1746362E-02   .1620664E-02
   .1649631E-02   .1764149E-02   .1795682E-02   .1745695E-02   .1665263E-02
   .1409355E-02   .9223581E-03   .4085614E-03  -.5207055E-04  -.5398598E-03
  -.9547554E-03  -.1191878E-02  -.1278504E-02  -.1240237E-02  -.1233751E-02
  -.1297779E-02  -.1334077E-02  -.1155843E-02  -.5245668E-03   .4227230E-03
   .1255533E-02   .1878218E-02   .2622777E-02   .3412213E-02   .4063151E-02
   .4809616E-02   .5668484E-02   .6270582E-02   .6208207E-02   .5533504E-02
   .4664675E-02   .3928596E-02   .3566988E-02   .3520126E-02   .3281670E-02
   .2519439E-02   .1552092E-02   .8590744E-03   .6175146E-03   .4621502E-03
  -.9136060E-04  -.7801581E-03  -.1239490E-02  -.1507717E-02  -.1615824E-02
  -.1513274E-02  -.1237736E-02  -.1106304E-02  -.1280828E-02  -.1594808E-02
  -.1918918E-02  -.2302250E-02  -.2723282E-02  -.2994565E-02  -.3083874E-02
  -.2995069E-02  -.2739691E-02  -.2644307E-02  -.3003400E-02  -.3413635E-02
  -.3222353E-02  -.2376543E-02  -.1369116E-02  -.4739594E-03   .2899272E-03
   .8484983E-03   .1313802E-02   .1816121E-02   .2439789E-02   .3143942E-02
   .3503141E-02   .3207454E-02   .2615584E-02   .2191467E-02   .1939579E-02
   .1672581E-02   .1356543E-02   .1031170E-02   .6617508E-03   .2674679E-03
   .1219046E-03   .4307101E-03   .9044534E-03   .1187245E-02   .1200844E-02
   .1243639E-02   .1701398E-02   .2587546E-02   .3695315E-02   .4709948E-02
   .5359778E-02   .5489153E-02   .5188807E-02   .4877180E-02   .4980111E-02
   .5558531E-02   .6163686E-02   .6338998E-02   .6160851E-02   .5960425E-02
   .5835681E-02   .5696720E-02   .5272156E-02   .4400351E-02   .3466808E-02
   .2942466E-02   .2886505E-02   .3075425E-02   .3183443E-02   .3109203E-02
   .2980840E-02   .2883602E-02   .2860241E-02   .2886408E-02   .2901537E-02
   .2885394E-02   .2889685E-02   .2884100E-02   .2866576E-02   .2893496E-02
   .2881865E-02   .2638943E-02   .1959161E-02   .9613026E-03   .1442231E-03
  -.3018575E-03  -.8061958E-03  -.1577268E-02  -.2285133E-02  -.2644719E-02
  -.2666918E-02  -.2799336E-02  -.3352902E-02  -.3819261E-02  -.3620017E-02
  -.2895978E-02  -.2286242E-02  -.2114646E-02  -.2035678E-02  -.1670724E-02
  -.1046580E-02  -.4879032E-03  -.1770624E-03   .7070535E-05   .1752776E-03
   .4680012E-03   .7160639E-03   .6332988E-03   .3691992E-03   .1370994E-03
   .1070641E-03   .2157419E-03   .2809253E-03   .2896059E-03   .2616904E-03
   .2155989E-03   .2164103E-03   .3592928E-03   .6149421E-03   .8908810E-03
   .9844286E-03   .8080962E-03   .6090501E-03   .7788979E-03   .1410986E-02
   .2005109E-02   .2153582E-02   .2017647E-02   .1918219E-02   .1957149E-02
   .2054663E-02   .2073285E-02   .1776187E-02   .1019613E-02   .3743178E-04
  -.9394854E-03  -.1805458E-02  -.2409182E-02  -.2820210E-02  -.3384677E-02
  -.4240342E-02  -.5054018E-02  -.5436518E-02  -.5256717E-02  -.4738209E-02
  -.4355973E-02  -.4209442E-02  -.4092323E-02  -.3976943E-02  -.3723585E-02
  -.3209243E-02  -.2652140E-02  -.2376658E-02  -.2394642E-02  -.2510088E-02
  -.2596513E-02  -.2565146E-02  -.2524708E-02  -.2707481E-02  -.2954007E-02
  -.2921564E-02  -.2682042E-02  -.2459782E-02  -.2371213E-02  -.2514842E-02
  -.2832349E-02  -.3103604E-02  -.3146794E-02  -.3026690E-02  -.2973287E-02
  -.2870417E-02  -.2720656E-02  -.2808986E-02  -.2968809E-02  -.2934739E-02
  -.2715259E-02  -.2473178E-02  -.2388593E-02  -.2366377E-02  -.2164639E-02
  -.1731163E-02  -.1380390E-02  -.1468235E-02  -.1806484E-02  -.2037679E-02
  -.2092695E-02  -.2137598E-02  -.2293674E-02  -.2497347E-02  -.2679719E-02
  -.2735040E-02  -.2668269E-02  -.2633095E-02  -.2652278E-02  -.2686515E-02
  -.2720762E-02  -.2711746E-02  -.2600974E-02  -.2354483E-02  -.2194530E-02
  -.2171778E-02  -.1864175E-02  -.1133316E-02  -.2713432E-03   .5142524E-03
   .1316026E-02   .2145882E-02   .2660652E-02   .2768795E-02   .2822581E-02
   .3106053E-02   .3486238E-02   .3670419E-02   .3733568E-02   .3797211E-02
   .3683467E-02   .3306705E-02   .2862848E-02   .2536007E-02   .2112637E-02
   .1289635E-02   .3673900E-03  -.1465845E-03  -.2157708E-03  -.1827698E-03
  -.2868889E-03  -.5457192E-03  -.9206591E-03  -.1173547E-02  -.1050514E-02
  -.5763991E-03  -.7082989E-04   .1696380E-03   .1631548E-03   .1691835E-03
   .2794905E-03   .2788955E-03   .1120091E-03  -.1186731E-04   .9323745E-04
   .3823248E-03   .6879884E-03   .9442615E-03   .1147793E-02   .1247017E-02
   .1219565E-02   .1169940E-02   .1268159E-02   .1542531E-02   .1773327E-02
   .1715637E-02   .1411984E-02   .1070870E-02   .7964639E-03   .6321175E-03
   .5101344E-03   .3031824E-03   .7139259E-04  -.7373290E-04  -.1117345E-03
  -.7435025E-04  -.2446373E-04  -.1628519E-04  -.3300260E-04  -.5658167E-04
  -.7210756E-04  -.3493196E-04  -.1755464E-04  -.2863730E-04   .6474297E-06
   .1572873E-03   .5738879E-03   .1108977E-02   .1311832E-02   .9359123E-03
   .2819196E-03  -.1501397E-03  -.1749740E-03  -.2912903E-05   .2124045E-04
  -.3790027E-03  -.1150779E-02  -.1829653E-02  -.2088507E-02  -.2025411E-02
  -.1852635E-02  -.1731443E-02  -.1628656E-02  -.1324372E-02  -.8829061E-03
  -.5491220E-03  -.3436086E-03  -.1826952E-03  -.4798315E-04  -.5191338E-05
  -.2392307E-04  -.2945026E-04  -.3368978E-04  -.1488231E-04   .9676590E-05
  -.7861345E-05   .5438554E-04   .3367347E-03   .8242478E-03   .1368358E-02
   .1843203E-02   .2269416E-02   .2572799E-02   .2697698E-02   .2705537E-02
   .2598062E-02   .2376718E-02   .2161356E-02   .1917315E-02   .1417654E-02
   .7100749E-03   .1000713E-03  -.1284846E-03  -.1200619E-03  -.2611287E-03
  -.6827969E-03  -.1252280E-02  -.1707553E-02  -.1759215E-02  -.1231449E-02
  -.4532563E-03  -.6082851E-04  -.1588605E-03  -.2949900E-03  -.2235976E-03
  -.4149068E-04   .1320093E-03   .2896271E-03   .4889403E-03   .5906420E-03
   .4106213E-03   .1194512E-03  -.4225612E-04  -.4619732E-04   .4064117E-04
   .1170834E-03   .1155530E-03   .2487096E-04  -.1620078E-03  -.4210652E-03
  -.4969269E-03  -.1253177E-03   .4411763E-03   .7974932E-03   .8058662E-03
   .5020925E-03   .2728146E-03   .6212984E-03   .1536108E-02   .2344807E-02
   .2572962E-02   .2638588E-02   .3041507E-02   .3629768E-02   .3866253E-02
   .3523962E-02   .2921916E-02   .2529905E-02   .2515203E-02   .2476189E-02
   .1934452E-02   .9224851E-03  -.1983991E-03  -.1221111E-02  -.2071922E-02
  -.2578850E-02  -.2690383E-02  -.2598831E-02  -.2530829E-02  -.2570284E-02
  -.2658450E-02  -.2716854E-02  -.2725240E-02  -.2638563E-02  -.2390222E-02
  -.2146275E-02  -.2187641E-02  -.2459088E-02  -.2687846E-02  -.2749672E-02
  -.2664633E-02  -.2559006E-02  -.2524778E-02  -.2544946E-02  -.2590662E-02
  -.2615780E-02  -.2606401E-02  -.2585930E-02  -.2585078E-02  -.2592302E-02
  -.2590425E-02  -.2591892E-02  -.2564272E-02  -.2525483E-02  -.2526571E-02
  -.2533270E-02  -.2551506E-02  -.2684955E-02  -.2942040E-02  -.3114583E-02
  -.3132649E-02  -.3322713E-02  -.3892893E-02  -.4531420E-02  -.4793574E-02
  -.4528798E-02  -.3885221E-02  -.3140279E-02  -.2606094E-02  -.2455274E-02
  -.2564232E-02  -.2688718E-02  -.2537813E-02  -.1874929E-02  -.8491778E-03
   .9680481E-05   .3540364E-03   .4572875E-03   .8739291E-03   .1740020E-02
   .2602870E-02   .3025057E-02   .3150637E-02   .3390260E-02   .3968168E-02
   .4779304E-02   .5417414E-02   .5633619E-02   .5532770E-02   .5358170E-02
   .5309163E-02   .5404701E-02   .5525449E-02   .5524045E-02   .5224284E-02
   .4666303E-02   .4176305E-02   .3917650E-02   .3730239E-02   .3419694E-02
   .3030884E-02   .2777774E-02   .2666962E-02   .2434574E-02   .2074936E-02
   .1878737E-02   .1872964E-02   .1828366E-02   .1654635E-02   .1568701E-02
   .1809443E-02   .2321414E-02   .2780317E-02   .2927715E-02   .2834760E-02
   .2682373E-02   .2634665E-02   .2719237E-02   .2798851E-02   .2830535E-02
   .2834641E-02   .2797368E-02   .2753333E-02   .2782628E-02   .2936391E-02
   .3169755E-02   .3279691E-02   .3125896E-02   .2870294E-02   .2729042E-02
   .2752087E-02   .2866432E-02   .2928044E-02   .2731160E-02   .2103455E-02
   .1139170E-02   .3048697E-03   .1237008E-05   .1287387E-03   .3546944E-03
   .4218725E-03   .3647540E-03   .4143831E-03   .5609849E-03   .5942933E-03
   .4501914E-03   .4036038E-03   .7850478E-03   .1485565E-02   .2107887E-02
   .2371038E-02   .2159088E-02   .1541194E-02   .8867424E-03   .4641702E-03
   .1209445E-03  -.1794764E-03  -.1996916E-03  -.3078794E-04  -.2398640E-04
  -.2977549E-03  -.8576886E-03  -.1551128E-02  -.1927615E-02  -.1705579E-02
  -.1285304E-02  -.1288277E-02  -.1796417E-02  -.2399914E-02  -.2678065E-02
  -.2516206E-02  -.2093686E-02  -.1820534E-02  -.1975146E-02  -.2362387E-02
  -.2530494E-02  -.2186847E-02  -.1539887E-02  -.1055006E-02  -.9520137E-03
  -.1115511E-02  -.1297685E-02  -.1332227E-02  -.1101161E-02  -.6315483E-03
  -.2156901E-03  -.1437311E-03  -.3590076E-03  -.5494405E-03  -.4635220E-03
  -.8895425E-04   .2538691E-03   .2139984E-03  -.1623873E-03  -.5234890E-03
  -.6354855E-03  -.5563196E-03  -.3932687E-03  -.1552309E-03   .1026682E-03
   .2610662E-03   .2657915E-03   .2033062E-03   .1636167E-03   .1671078E-03
   .2167001E-03   .2527440E-03   .2515296E-03   .2376207E-03   .2217991E-03
   .2311306E-03   .2372240E-03   .2247017E-03   .1754993E-03  -.2077329E-04
  -.3207899E-03  -.6493571E-03  -.1087502E-02  -.1572799E-02  -.1932882E-02
  -.2146455E-02  -.2301742E-02  -.2470941E-02  -.2691545E-02  -.2866889E-02
  -.2797861E-02  -.2529458E-02  -.2352615E-02  -.2369456E-02  -.2477817E-02
  -.2580817E-02  -.2590027E-02  -.2277480E-02  -.1475887E-02  -.4456412E-03
   .3070647E-03   .4696938E-03   .3692059E-03   .4507918E-03   .6081301E-03
   .6127223E-03   .4727807E-03   .3356018E-03   .2572622E-03   .1075308E-03
  -.2516554E-03  -.7680768E-03  -.1289632E-02  -.1769794E-02  -.2142255E-02
  -.2354589E-02  -.2590858E-02  -.3173099E-02  -.4108783E-02  -.4958515E-02
  -.5364501E-02  -.5301613E-02  -.5055840E-02  -.4925543E-02  -.4832228E-02
  -.4688679E-02  -.4489067E-02  -.4028494E-02  -.3320579E-02  -.2814131E-02
  -.2681694E-02  -.2436021E-02  -.1699379E-02  -.7716866E-03  -.1714346E-03
   .6777339E-04   .1555577E-03   .1588703E-03   .2558502E-03   .5858778E-03
   .1086150E-02   .1609609E-02   .2014135E-02   .2225987E-02   .2289902E-02
   .2270972E-02   .2306947E-02   .2553293E-02   .2888347E-02   .2961076E-02
   .2491723E-02   .1552780E-02   .5760311E-03   .5359140E-04  -.1465441E-04
  -.1581416E-03  -.8008000E-03  -.1786084E-02  -.2527339E-02  -.2660972E-02
  -.2427987E-02  -.2457771E-02  -.3182166E-02  -.4318906E-02  -.5053261E-02
  -.4780819E-02  -.3700786E-02  -.2740750E-02  -.2423142E-02  -.2447289E-02
  -.2542404E-02  -.2569687E-02  -.2474947E-02  -.2356072E-02  -.2300857E-02
  -.2337778E-02  -.2404421E-02  -.2419366E-02  -.2426970E-02  -.2441595E-02
  -.2423241E-02  -.2430879E-02  -.2436018E-02  -.2452060E-02  -.2455377E-02
  -.2411268E-02  -.2212358E-02  -.1531392E-02  -.5357619E-03   .2201403E-03
   .4906113E-03   .5796662E-03   .8792512E-03   .1523222E-02   .2358027E-02
   .2765933E-02   .2399683E-02   .1509960E-02   .5862965E-03   .9739822E-04
   .1313149E-03   .3762346E-03   .5127837E-03   .4619924E-03   .3106957E-03
   .2153987E-03   .2755266E-03   .5582863E-03   .1143475E-02   .1910922E-02
   .2571772E-02   .2983747E-02   .3139926E-02   .3406484E-02   .4104835E-02
   .4717416E-02   .4833663E-02   .4483956E-02   .3813272E-02   .3214149E-02
   .2914332E-02   .2849784E-02   .2599488E-02   .1809143E-02   .8321630E-03
   .2150853E-03   .1032853E-03   .3082401E-03   .5014483E-03   .5115384E-03
   .3962942E-03   .1543017E-03  -.1192191E-03  -.2192084E-03  -.1551420E-03
  -.8010799E-04  -.1938705E-03  -.5710818E-03  -.1194273E-02  -.1932194E-02
  -.2374927E-02  -.2373414E-02  -.2212844E-02  -.2091935E-02  -.2086366E-02
  -.2204244E-02  -.2155235E-02  -.1888503E-02  -.1796085E-02  -.1956591E-02
  -.2222279E-02  -.2574145E-02  -.3173265E-02  -.4025817E-02  -.4778962E-02
  -.5162117E-02  -.5292076E-02  -.5699501E-02  -.6375917E-02  -.6592829E-02
  -.6051873E-02  -.5206006E-02  -.4696205E-02  -.4538772E-02  -.4337963E-02
  -.3828264E-02  -.3089130E-02  -.2482418E-02  -.2183918E-02  -.2232932E-02
  -.2407447E-02  -.2451767E-02  -.2397120E-02  -.2307025E-02  -.2244342E-02
  -.2243736E-02  -.2262232E-02  -.2308136E-02  -.2211494E-02  -.1645119E-02
  -.6954540E-03   .1928787E-03   .6024945E-03   .4752066E-03   .1912309E-03
   .1049866E-03   .1810369E-03   .2494282E-03   .5562236E-04  -.6836767E-03
  -.1715483E-02  -.2391509E-02  -.2614105E-02  -.2978825E-02  -.3773769E-02
  -.4673141E-02  -.5204608E-02  -.5050327E-02  -.4200778E-02  -.2998812E-02
  -.2167892E-02  -.1959328E-02  -.1920698E-02  -.1600752E-02  -.8665035E-03
  -.4144270E-04   .4786218E-03   .5480293E-03   .3550519E-03   .1989614E-03
   .2051423E-03   .2968053E-03   .3785170E-03   .4101472E-03   .3655076E-03
   .3360671E-03   .3155288E-03   .1591769E-03  -.7349941E-04  -.1680824E-03
  -.4265976E-04   .2466434E-03   .4668969E-03   .4565285E-03   .2167217E-03
  -.3517328E-03  -.1269455E-02  -.2132175E-02  -.2512593E-02  -.2460969E-02
  -.2241777E-02  -.2150649E-02  -.2252548E-02  -.2338601E-02  -.2084435E-02
  -.1274834E-02  -.1874588E-03   .5206441E-03   .5637755E-03   .2987068E-03
   .1008924E-03   .1096426E-03   .2448032E-03   .3953866E-03   .4331354E-03
   .3458038E-03   .3209396E-03   .5135343E-03   .1067103E-02   .1665135E-02
   .1629900E-02   .9499500E-03   .2463741E-03  -.7115663E-04   .7031714E-04
   .4119638E-03   .7295569E-03   .1057054E-02   .1186081E-02   .9668680E-03
   .8582653E-03   .1258712E-02   .1772559E-02   .1907678E-02   .1534424E-02
   .8059308E-03   .2389389E-03   .2470955E-03   .6182785E-03   .8135530E-03
   .6525151E-03   .3522864E-03   .1277081E-03   .8119330E-04   .2389891E-03
   .4138827E-03   .5722386E-03   .7953052E-03   .1051085E-02   .1539219E-02
   .2195362E-02   .2579714E-02   .2508227E-02   .2150640E-02   .1762657E-02
   .1444156E-02   .1113485E-02   .7534470E-03   .4038950E-03   .1475243E-03
   .1791256E-03   .2028195E-03  -.2340581E-03  -.1089092E-02  -.2049395E-02
  -.2643777E-02  -.2670108E-02  -.2416338E-02  -.2221455E-02  -.2267183E-02
  -.2458389E-02  -.2568534E-02  -.2569468E-02  -.2505222E-02  -.2448181E-02
  -.2347451E-02  -.2043940E-02  -.1512540E-02  -.7877450E-03  -.9342255E-04
   .2765692E-03   .2892308E-03   .1725831E-03   .9468564E-04   .9920186E-04
   .2008193E-03   .2694204E-03   .2733638E-03   .2543080E-03   .4404033E-03
   .1190917E-02   .2259766E-02   .3007519E-02   .3177512E-02   .3103424E-02
   .3368520E-02   .4226445E-02   .5149746E-02   .5252839E-02   .4375090E-02
   .3202492E-02   .2357249E-02   .1920204E-02   .1630246E-02   .1143216E-02
   .3834597E-03  -.5758958E-03  -.1612813E-02  -.2332924E-02  -.2582456E-02
  -.2477765E-02  -.2256671E-02  -.2249155E-02  -.2365219E-02  -.2463786E-02
  -.2517305E-02  -.2490122E-02  -.2451722E-02  -.2418431E-02  -.2413816E-02
  -.2297693E-02  -.1744907E-02  -.8204515E-03  -.1712936E-04   .3169101E-03
   .2533920E-03   .2948291E-03   .9020154E-03   .1951599E-02   .2831880E-02
   .3141404E-02   .2987836E-02   .2697547E-02   .2611853E-02   .2734839E-02
   .2849594E-02   .2719964E-02   .2244037E-02   .1656028E-02   .1129386E-02
   .6483160E-03   .2821446E-03   .1483964E-03   .4102927E-03   .1165059E-02
   .2154204E-02   .2909089E-02   .3083322E-02   .2834893E-02   .2751490E-02
   .3294848E-02   .4406071E-02   .5478604E-02   .5939617E-02   .5773835E-02
   .5437623E-02   .5302428E-02   .5384560E-02   .5528007E-02   .5596833E-02
   .5577363E-02   .5501532E-02   .5389953E-02   .5104875E-02   .4572337E-02
   .3902536E-02   .3153004E-02   .2388004E-02   .1546323E-02   .6986312E-03
   .1260360E-03  -.3500896E-04   .8618817E-04   .2124073E-03   .2121290E-03
   .1137001E-03   .1207135E-03   .4225687E-03   .1018514E-02   .1781757E-02
   .2491535E-02   .2856630E-02   .2835367E-02   .2702061E-02   .2640535E-02
   .2670849E-02   .2772513E-02   .2771711E-02   .2328015E-02   .1435337E-02
   .4902915E-03  -.7642609E-04  -.2343595E-03  -.4778376E-03  -.1104655E-02
  -.1807445E-02  -.2273911E-02  -.2519601E-02  -.2575908E-02  -.2563392E-02
  -.2574840E-02  -.2597073E-02  -.2660874E-02  -.2679631E-02  -.2654065E-02
  -.2650895E-02  -.2645602E-02  -.2642129E-02  -.2600564E-02  -.2584231E-02
  -.2644975E-02  -.2637638E-02  -.2488900E-02  -.2111775E-02  -.1591124E-02
  -.1141831E-02  -.8366379E-03  -.9285223E-03  -.1424910E-02  -.1847458E-02
  -.2002397E-02  -.2103107E-02  -.2268965E-02  -.2509135E-02  -.2661760E-02
  -.2629897E-02  -.2615991E-02  -.2911013E-02  -.3688967E-02  -.4582634E-02
  -.4982698E-02  -.4793249E-02  -.4296125E-02  -.3696569E-02  -.3141028E-02
  -.2703669E-02  -.2507296E-02  -.2547819E-02  -.2488175E-02  -.2081377E-02
  -.1359071E-02  -.5804437E-03  -.6682601E-05   .2083115E-03   .1117651E-03
  -.7945111E-05  -.2696118E-04   .3997467E-04   .1269550E-03   .1783070E-03
   .1530671E-03  -.1411798E-03  -.8501723E-03  -.1789314E-02  -.2486918E-02
  -.2686896E-02  -.2517469E-02  -.2310924E-02  -.2331763E-02  -.2632080E-02
  -.3012904E-02  -.3090285E-02  -.2818929E-02  -.2483370E-02  -.2321914E-02
  -.2419202E-02  -.2528412E-02  -.2339530E-02  -.1697016E-02  -.6885131E-03
   .1076204E-03   .3144266E-03   .1300073E-03  -.1460548E-03  -.1892687E-03
   .2618318E-03   .1109984E-02   .1925345E-02   .2314553E-02   .2146219E-02
   .1677944E-02   .1302209E-02   .1189552E-02   .1321607E-02   .1484323E-02
   .1519291E-02   .1434669E-02   .1306403E-02   .1234220E-02   .1231280E-02
   .1265064E-02   .1354100E-02   .1629567E-02   .2110648E-02   .2593627E-02
   .2798589E-02   .2719077E-02   .2593052E-02   .2552393E-02   .2601789E-02
   .2650428E-02   .2684945E-02   .2687772E-02   .2645583E-02   .2592005E-02
   .2551126E-02   .2552223E-02   .2560678E-02   .2511388E-02   .2317820E-02
   .2120984E-02   .2000750E-02   .1711824E-02   .1169616E-02   .5607114E-03
   .2186960E-03   .2685277E-03   .5372876E-03   .7575148E-03   .7511702E-03
   .8109494E-03   .1295818E-02   .2051697E-02   .2681178E-02   .2890707E-02
   .2722490E-02   .2503744E-02   .2471408E-02   .2573949E-02   .2645116E-02
   .2683996E-02   .2677838E-02   .2606955E-02   .2567600E-02   .2464119E-02
   .2231718E-02   .2129419E-02   .2275649E-02   .2422773E-02   .2357714E-02
   .2237914E-02   .2180349E-02   .2017137E-02   .1580411E-02   .8918220E-03
   .2191466E-03  -.1420281E-03  -.1305705E-03   .3211668E-04   .1182719E-03
  -.5302091E-04  -.6340407E-03  -.1445802E-02  -.2073303E-02  -.2381818E-02
  -.2489187E-02  -.2529545E-02  -.2716557E-02  -.3159139E-02  -.3545501E-02
  -.3485782E-02  -.3176740E-02  -.2999688E-02  -.2960517E-02  -.2900544E-02
  -.2740572E-02  -.2510206E-02  -.1908726E-02  -.9690413E-03  -.1611163E-03
   .1869497E-03   .1262977E-03  -.9164365E-04  -.1889150E-03  -.1003875E-03
   .2769545E-04   .8769942E-04   .8652657E-04   .3855113E-04  -.4529929E-06
  -.3977994E-04  -.2347427E-03  -.7176978E-03  -.1448828E-02  -.2151661E-02
  -.2593979E-02  -.2750541E-02  -.2674001E-02  -.2539384E-02  -.2312697E-02
  -.1709433E-02  -.8276073E-03  -.7822081E-04   .2395697E-03   .3287358E-03
   .7959629E-03   .1718723E-02   .2562274E-02   .2919111E-02   .2815085E-02
   .2594325E-02   .2516834E-02   .2623828E-02   .2919676E-02   .3201584E-02
   .3192430E-02   .2931986E-02   .2666796E-02   .2569064E-02   .2644884E-02
   .2762513E-02   .2743134E-02   .2394216E-02   .1598027E-02   .6336153E-03
  -.1005165E-05  -.1118297E-03   .9774376E-04   .2987623E-03   .3069841E-03
   .2446649E-03   .3658658E-03   .5574360E-03   .7332370E-03   .1106789E-02
   .1595999E-02   .1755236E-02   .1420167E-02   .9588965E-03   .6408614E-03
   .4532869E-03   .3578532E-03   .3593720E-03   .3719043E-03   .3440939E-03
   .3190808E-03   .2922854E-03   .2811313E-03   .3047905E-03   .3470282E-03
   .3837883E-03   .4053928E-03   .3180202E-03   .8230710E-04  -.2033529E-03
  -.4326106E-03  -.6264517E-03  -.7985849E-03  -.8626534E-03  -.8379281E-03
  -.6751016E-03  -.2897486E-03   .1975210E-03   .5528138E-03   .6643185E-03
   .5959293E-03   .4860505E-03   .4881419E-03   .5777398E-03   .6593866E-03
   .7020074E-03   .6891535E-03   .6793341E-03   .6974716E-03   .7181613E-03
   .7675270E-03   .8225309E-03   .8458864E-03   .8574014E-03   .8975711E-03
   .9439099E-03   .9622777E-03   .1003989E-02   .1066273E-02   .1109079E-02
   .1124350E-02   .1121650E-02   .1144568E-02   .1185742E-02   .1213117E-02
   .1241848E-02   .1281136E-02   .1332762E-02   .1367419E-02   .1402481E-02
   .1447633E-02   .1478904E-02   .1514398E-02   .1539486E-02   .1558317E-02
   .1556234E-02   .1354918E-02   .7373649E-03  -.1252347E-03  -.7691913E-03
  -.9801873E-03  -.1026383E-02  -.1429120E-02  -.2262096E-02  -.3032648E-02
  -.3333671E-02  -.3200074E-02  -.2944584E-02  -.2806412E-02  -.2847746E-02
  -.2957207E-02  -.2997314E-02  -.2968308E-02  -.2875704E-02  -.2796390E-02
  -.2780264E-02  -.2776394E-02  -.2783869E-02  -.2798861E-02  -.2788390E-02
  -.2741568E-02  -.2686940E-02  -.2645406E-02  -.2647899E-02  -.2676807E-02
  -.2663131E-02  -.2611322E-02  -.2579618E-02  -.2570411E-02  -.2555882E-02
  -.2547199E-02  -.2544293E-02  -.2527620E-02  -.2510486E-02  -.2504483E-02
  -.2496790E-02  -.2470787E-02  -.2440837E-02  -.2422826E-02  -.2411991E-02
  -.2416360E-02  -.2274143E-02  -.1752139E-02  -.1029772E-02  -.5035317E-03
  -.2401943E-03  -.1302514E-03  -.6236171E-04  -.1880518E-05   .2771004E-04
   .6868379E-04   .9100653E-04   .8126873E-04   .8606595E-04   .8297533E-04
   .7086706E-04   .7875538E-04   .8099707E-04   .7367876E-04   .3946877E-04
   .3130548E-04   .2351105E-03   .6747396E-03   .1109114E-02   .1374796E-02
   .1572021E-02   .1831529E-02   .2186707E-02   .2570599E-02   .2851685E-02
   .2954393E-02   .2912687E-02   .2826547E-02   .2702520E-02   .2504394E-02
   .2316427E-02   .2215343E-02   .2200601E-02   .2152747E-02   .1822907E-02
   .1103563E-02   .2907006E-03  -.1926796E-03  -.2413904E-03  -.4746402E-04
   .1078190E-03   .8396724E-04  -.2259008E-04  -.9455223E-06   .2947545E-03
   .7792217E-03   .1144997E-02   .1193813E-02   .9528095E-03   .5125372E-03
   .7162633E-04  -.1506376E-03  -.1276460E-03  -.1867073E-04  -.1026551E-03
  -.6257529E-03  -.1463935E-02  -.2157613E-02  -.2408776E-02  -.2269536E-02
  -.2023573E-02  -.1948471E-02  -.2014115E-02  -.1962012E-02  -.1690398E-02
  -.1411041E-02  -.1360352E-02  -.1509255E-02  -.1646578E-02  -.1729699E-02
  -.1856134E-02  -.2025196E-02  -.2165256E-02  -.2202834E-02  -.2159674E-02
  -.2106426E-02  -.2079586E-02  -.2085435E-02  -.2104787E-02  -.2107837E-02
  -.2091614E-02  -.2084706E-02  -.2082355E-02  -.2074914E-02  -.2070569E-02
  -.1994074E-02  -.1732518E-02  -.1253591E-02  -.6611709E-03  -.1790313E-03
   .8095850E-05  -.5939338E-04  -.7325132E-04   .2681822E-03   .9812720E-03
   .1714099E-02   .2057623E-02   .1981340E-02   .1745516E-02   .1607559E-02
   .1625304E-02   .1710367E-02   .1764486E-02   .1745468E-02   .1663586E-02
   .1564408E-02   .1514350E-02   .1483637E-02   .1494063E-02   .1673712E-02
   .2031086E-02   .2243682E-02   .2037780E-02   .1756004E-02   .1784510E-02
   .2029337E-02   .2171476E-02   .1980085E-02   .1524283E-02   .1089046E-02
   .8462189E-03   .6954983E-03   .4068252E-03  -.1109408E-03  -.6744424E-03
  -.1039712E-02  -.1179575E-02  -.1379201E-02  -.1877471E-02  -.2517088E-02
  -.2972821E-02  -.3071356E-02  -.2931733E-02  -.2802260E-02  -.2791749E-02
  -.2872774E-02  -.2960954E-02  -.2991446E-02  -.2968106E-02  -.2922042E-02
  -.2855894E-02  -.2627049E-02  -.2089811E-02  -.1427717E-02  -.9765504E-03
  -.8126826E-03  -.8056937E-03  -.8566529E-03  -.8677248E-03  -.6808778E-03
  -.2438435E-03   .2729533E-03   .6301712E-03   .7148190E-03   .6155703E-03
   .5185911E-03   .5098549E-03   .5622253E-03   .6247316E-03   .6543416E-03
   .6375713E-03   .5952889E-03   .6114499E-03   .7444029E-03   .8876421E-03
   .8739530E-03   .7162611E-03   .5633670E-03   .5131622E-03   .5576913E-03
   .5670313E-03   .3537970E-03  -.1153391E-03  -.5652108E-03  -.7371566E-03
  -.6138268E-03  -.2692491E-03   .1115370E-03   .3305660E-03   .4117169E-03
   .4694425E-03   .5387505E-03   .6117313E-03   .7168348E-03   .9351163E-03
   .1220286E-02   .1413265E-02   .1395139E-02   .1185350E-02   .9600526E-03
   .8128760E-03   .7066091E-03   .5739417E-03   .4034458E-03   .2379518E-03
   .6394059E-05  -.3259172E-03  -.5235489E-03  -.3567270E-03   .5798025E-04
   .4446158E-03   .6517497E-03   .6681452E-03   .5888441E-03   .5258762E-03
   .5263246E-03   .5763567E-03   .6396686E-03   .7424658E-03   .9016600E-03
   .1132570E-02   .1484400E-02   .1857773E-02   .2056797E-02   .2040220E-02
   .1935290E-02   .1865026E-02   .1864901E-02   .1906144E-02   .1932390E-02
   .1915263E-02   .1848009E-02   .1716214E-02   .1556304E-02   .1402042E-02
   .1248960E-02   .1088638E-02   .9234357E-03   .8825179E-03   .1069570E-02
   .1345526E-02   .1542774E-02   .1635205E-02   .1661415E-02   .1655924E-02
   .1641679E-02   .1637872E-02   .1635723E-02   .1619512E-02   .1594672E-02
   .1562417E-02   .1539176E-02   .1528526E-02   .1515284E-02   .1513807E-02
   .1584656E-02   .1839351E-02   .2245445E-02   .2594456E-02   .2728044E-02
   .2666214E-02   .2544490E-02   .2467880E-02   .2466608E-02   .2496923E-02
   .2508737E-02   .2481923E-02   .2423910E-02   .2355571E-02   .2230566E-02
   .1987780E-02   .1664145E-02   .1342030E-02   .1125504E-02   .1064103E-02
   .1080373E-02   .1103575E-02   .1094056E-02   .1028940E-02   .8749049E-03
   .5682268E-03   .1749723E-03  -.1114065E-03  -.1877389E-03  -.1188639E-03
  -.3517201E-04  -.4630816E-04  -.1744706E-03  -.3087338E-03  -.3114145E-03
  -.1876338E-03  -.6491931E-04  -.2136294E-04  -.4927634E-04  -.9997847E-04
  -.1229524E-03  -.1070518E-03  -.7772213E-04  -.6877174E-04  -.7559628E-04
  -.8209276E-04  -.6260975E-04   .7259190E-04   .3626364E-03   .6833752E-03
   .8707594E-03   .8748373E-03   .7793756E-03   .7081107E-03   .7037662E-03
   .7311357E-03   .7537567E-03   .7495615E-03   .7156799E-03   .6825070E-03
   .6642157E-03   .6548269E-03   .6533201E-03   .6444277E-03   .6246029E-03
   .6085356E-03   .5929572E-03   .5751448E-03   .5656606E-03   .5542258E-03
   .5343388E-03   .4868269E-03   .3600582E-03   .1931836E-03   .1138951E-03
   .1570492E-03   .2564444E-03   .3563211E-03   .4208610E-03   .4363160E-03
   .4158744E-03   .3889659E-03   .3766224E-03   .3726540E-03   .3732026E-03
   .3692231E-03   .3513358E-03   .3331529E-03   .3206278E-03   .3071124E-03
   .2939283E-03   .2943993E-03   .3273017E-03   .3713615E-03   .3652765E-03
   .2908953E-03   .2096564E-03   .1585055E-03   .6145402E-04  -.1367016E-03
  -.3528981E-03  -.4750044E-03  -.4755139E-03  -.4178154E-03  -.3898579E-03
  -.4428385E-03  -.5720600E-03  -.6974582E-03  -.7450157E-03  -.7226441E-03
  -.6724430E-03  -.6415780E-03  -.6561502E-03  -.7181416E-03  -.8135319E-03
  -.8884211E-03  -.9016330E-03  -.8681738E-03  -.8178029E-03  -.7602937E-03
  -.7205769E-03  -.7311979E-03  -.7702623E-03  -.7673744E-03  -.6526808E-03
  -.4486376E-03  -.2830429E-03  -.2339214E-03  -.2711072E-03  -.3221549E-03
  -.3313368E-03  -.3065533E-03  -.2788228E-03  -.2487388E-03  -.2040849E-03
  -.1553362E-03  -.1206675E-03  -.8931131E-04  -.5839375E-04  -.5439339E-04
  -.8025660E-04  -.1091103E-03  -.1356226E-03  -.1816657E-03  -.2410001E-03
  -.2545796E-03  -.2001704E-03  -.1558537E-03  -.1853871E-03  -.2576252E-03
  -.3127403E-03  -.3208282E-03  -.2945016E-03  -.2708265E-03  -.2651622E-03
  -.2587938E-03  -.2397413E-03  -.2328312E-03  -.2531766E-03  -.2785252E-03
  -.2895310E-03  -.2867365E-03  -.2775725E-03  -.2690068E-03  -.2696950E-03
  -.2736687E-03  -.2746460E-03  -.2751230E-03  -.2718142E-03  -.2714628E-03
  -.2856220E-03  -.3082701E-03  -.3329657E-03  -.3721116E-03  -.4267827E-03
  -.4706494E-03  -.4686624E-03  -.4188819E-03  -.3607212E-03  -.3305881E-03
  -.3287428E-03  -.3280317E-03  -.3129470E-03  -.2876657E-03  -.2564381E-03
  -.2163034E-03  -.1690044E-03  -.1194171E-03  -.7583748E-04  -.5266063E-04
  -.4383733E-04  -.2538106E-04   .5375358E-05   .2869176E-04   .3058757E-04
   .2702667E-05  -.4789329E-04  -.9634018E-04  -.1215068E-03  -.1227487E-03
  -.1188439E-03  -.1289114E-03  -.1537028E-03  -.1781210E-03  -.1979631E-03
  -.2151042E-03  -.2299174E-03  -.2406748E-03  -.2485816E-03  -.2595046E-03
  -.2700096E-03  -.2707062E-03  -.2562896E-03  -.2299896E-03  -.2019309E-03
  -.1882897E-03  -.1933728E-03  -.1988190E-03  -.1910359E-03  -.1771241E-03
  -.1702897E-03  -.1773582E-03  -.2008403E-03  -.2331832E-03  -.2557883E-03
  -.2588594E-03  -.2514057E-03  -.2481542E-03  -.2550244E-03  -.2656748E-03
  -.2705657E-03  -.2708169E-03  -.2753042E-03  -.2926472E-03  -.3167334E-03
  -.3289674E-03  -.3270157E-03  -.3174365E-03  -.3058997E-03  -.3011641E-03
  -.3017148E-03  -.3031710E-03  -.3034560E-03  -.2988578E-03  -.2927011E-03
  -.2882362E-03  -.2854726E-03  -.2827472E-03  -.2752015E-03  -.2656422E-03
  -.2571241E-03  -.2513469E-03  -.2500878E-03  -.2476806E-03  -.2436460E-03
  -.2395661E-03  -.2349838E-03  -.2314877E-03  -.2282664E-03  -.2261953E-03
  -.2256938E-03  -.2245067E-03  -.2207646E-03  -.2143967E-03  -.2083618E-03
  -.2046336E-03  -.2027395E-03  -.2007960E-03  -.1983738E-03  -.1948604E-03
  -.1886120E-03  -.1814091E-03  -.1754523E-03  -.1722990E-03  -.1710302E-03
  -.1681160E-03  -.1631615E-03  -.1583159E-03  -.1557071E-03  -.1553205E-03
  -.1552817E-03  -.1545485E-03  -.1535270E-03  -.1527830E-03  -.1531801E-03
  -.1546539E-03  -.1552111E-03  -.1554017E-03  -.1564469E-03  -.1571162E-03
  -.1559452E-03  -.1526425E-03  -.1497455E-03  -.1483649E-03  -.1477305E-03
  -.1469946E-03  -.1447765E-03  -.1415027E-03  -.1374337E-03  -.1333890E-03
  -.1308357E-03  -.1296884E-03  -.1295127E-03  -.1298710E-03  -.1302248E-03
  -.1303850E-03  -.1298534E-03  -.1285363E-03  -.1269263E-03  -.1252409E-03
  -.1239514E-03  -.1226884E-03  -.1207783E-03  -.1186776E-03  -.1169379E-03
  -.1155544E-03  -.1142132E-03  -.1125141E-03  -.1104692E-03  -.1085818E-03
  -.1070384E-03  -.1056047E-03  -.1041303E-03  -.1026895E-03  -.1014037E-03
  -.1002142E-03  -.9909634E-04  -.9804141E-04  -.9691297E-04  -.9570178E-04
  -.9445179E-04  -.9328306E-04  -.9216426E-04  -.9091758E-04  -.8963758E-04
  -.8839752E-04  -.8716944E-04  -.8587278E-04  -.8455501E-04  -.8326566E-04
  -.8195041E-04  -.8063192E-04  -.7927777E-04  -.7791637E-04  -.7656170E-04
  -.7519961E-04  -.7381721E-04  -.7239142E-04  -.7095567E-04  -.6951130E-04
  -.6806801E-04  -.6662634E-04  -.6513437E-04  -.6363208E-04  -.6213473E-04
  -.6059116E-04  -.5905051E-04  -.5749498E-04  -.5590265E-04  -.5431269E-04
  -.5271108E-04  -.5108579E-04  -.4944872E-04  -.4780850E-04  -.4614313E-04
  -.4445979E-04  -.4277288E-04  -.4107025E-04  -.3935066E-04  -.3761807E-04
  -.3586879E-04  -.3410153E-04  -.3231826E-04  -.3051701E-04  -.2869838E-04
  -.2686283E-04  -.2500940E-04  -.2313838E-04  -.2124975E-04
