# Supplementary material for: Earthquake Response Analysis of Tall Reinforced Concrete Chimneys considering Eccentricity
Source: Hindawi journal article supplement (doi:10.1155/2020/1417969), 2020-03-11
Supplement: f1 [file 1417969.f1.zip › 1417969.f1/Four kinds of earthquake records/Soft soil/CHICHI CHY004-N.txt]

PEER STRONG MOTION DATABASE RECORD. PROCESSING BY PACIFIC ENGINEERING.
CHI-CHI 09/20/99, CHY004, N (CWB)
ACCELERATION TIME HISTORY IN UNITS OF G. FILTER POINTS: HP=0.03 Hz LP=50.0 Hz
NPTS= 37500, DT= .00400 SEC
   .3067131E-06   .3083549E-06   .3246652E-06   .3334084E-06   .3370294E-06
   .3294746E-06   .3275077E-06   .3261228E-06   .3263679E-06   .3238189E-06
   .3235983E-06   .3230285E-06   .3240885E-06   .3223546E-06   .3301667E-06
   .3319252E-06   .3294928E-06   .3258963E-06   .3299832E-06   .3352343E-06
   .3403690E-06   .3409635E-06   .3488921E-06   .3457613E-06   .3359950E-06
   .3332135E-06   .3390468E-06   .3243910E-06   .2982100E-06   .2821573E-06
   .3020769E-06   .3431841E-06   .3743960E-06   .3620686E-06   .3471219E-06
   .3593000E-06   .3883583E-06   .4028064E-06   .3879180E-06   .3538211E-06
   .3399222E-06   .3363552E-06   .3346799E-06   .3401934E-06   .3512948E-06
   .3642589E-06   .3875839E-06   .3954839E-06   .3437792E-06   .2673073E-06
   .2598405E-06   .3033637E-06   .3808220E-06   .4547005E-06   .4718265E-06
   .4437835E-06   .3926029E-06   .3796356E-06   .3992647E-06   .3795745E-06
   .3943722E-06   .4740134E-06   .5502205E-06   .5290460E-06   .4326673E-06
   .3361721E-06   .3580714E-06   .4538946E-06   .5349329E-06   .5283104E-06
   .4716295E-06   .4819455E-06   .5526666E-06   .5114980E-06   .4116124E-06
   .4291754E-06   .5089041E-06   .5179979E-06   .4501412E-06   .3587105E-06
   .4079385E-06   .6176451E-06   .8553786E-06   .9316150E-06   .8261854E-06
   .6458134E-06   .5679451E-06   .5824233E-06   .6582523E-06   .7383306E-06
   .7207074E-06   .6898419E-06   .7227282E-06   .7213304E-06   .7208494E-06
   .8073524E-06   .9741474E-06   .9510527E-06   .7223316E-06   .5710680E-06
   .4535423E-06   .2790332E-06   .2161100E-06   .2211588E-06   .2323922E-06
   .4113656E-06   .6476153E-06   .7003071E-06   .6319270E-06   .7047587E-06
   .8490696E-06   .5791164E-06   .8890549E-07   .3606700E-07   .5172838E-06
   .9223650E-06   .8438569E-06   .4431112E-06   .2295615E-06   .3799842E-06
   .6240631E-06   .6816447E-06   .3923667E-06  -.4487497E-07   .4210143E-07
   .6515500E-06   .1311173E-05   .1477429E-05   .1224240E-05   .8960792E-06
   .6369531E-06   .3550095E-06   .9076113E-07   .1986925E-06   .6852065E-06
   .8724168E-06   .6640478E-06   .5157490E-06   .5877082E-06   .7284689E-06
   .7808702E-06   .7517809E-06   .7200141E-06   .6732879E-06   .4682951E-06
   .4112079E-06   .7512135E-06   .8845818E-06   .7998462E-06   .1105568E-05
   .1225607E-05   .9514630E-06   .8463547E-06   .8174984E-06   .8651270E-06
   .7579233E-06   .5653870E-06   .5910132E-06   .7692599E-06   .9587989E-06
   .1296651E-05   .1746844E-05   .2043252E-05   .1950834E-05   .1222321E-05
   .5701775E-06   .7119863E-06   .9924458E-06   .1171042E-05   .1237414E-05
   .1040570E-05   .3991370E-06  -.4242535E-06  -.1300569E-06   .1222588E-05
   .2019582E-05   .1560688E-05   .5881697E-06   .4649010E-06   .1158519E-05
   .1828737E-05   .1924794E-05   .1733539E-05   .1659398E-05   .2168498E-05
   .2728122E-05   .2462827E-05   .1765863E-05   .1033277E-05   .9314288E-06
   .1296173E-05   .1395491E-05   .1365820E-05   .1945234E-05   .2478549E-05
   .2406969E-05   .1935154E-05   .1805599E-05   .2172439E-05   .2169078E-05
   .1568740E-05   .8878423E-06   .2204488E-06  -.2986315E-06  -.8592508E-07
   .6955865E-06   .1407598E-05   .1944521E-05   .2012640E-05   .1567134E-05
   .1105563E-05   .1095218E-05   .1705134E-05   .2099914E-05   .1762908E-05
   .1310650E-05   .1805780E-05   .3459708E-05   .4866603E-05   .4339142E-05
   .2804686E-05   .1273259E-05  -.5275536E-06  -.1160094E-06   .2664819E-05
   .3691735E-05   .2251577E-05   .1358804E-05   .2139152E-05   .2642664E-05
   .1516362E-05   .2582776E-06   .3091672E-06   .9898637E-06   .9275976E-06
   .3831393E-06  -.4723192E-07   .1512724E-06   .9134596E-06   .1518952E-05
   .1617572E-05   .1580219E-05   .2090018E-05   .2475718E-05   .2112402E-05
   .1323239E-05   .3932135E-06   .1393280E-06   .7899896E-06   .1671852E-05
   .2736254E-05   .3456066E-05   .2670163E-05   .1764352E-05   .1728163E-05
   .1701753E-05   .8972235E-06   .2484574E-06   .8376519E-06   .2191463E-05
   .2286823E-05   .8860140E-06  -.8817358E-06  -.5640220E-06   .1302947E-05
   .1532651E-05   .2105392E-06   .1305786E-06   .9051064E-06   .1104310E-05
   .2702108E-06  -.6251226E-06   .5929984E-07   .3746857E-06  -.1236714E-06
  -.5004910E-06   .2025165E-07   .1205726E-05   .2035667E-05   .1933821E-05
   .6245148E-06  -.8531275E-06  -.6974638E-06   .1117585E-05   .3079316E-05
   .2883639E-05   .1135913E-05  -.3231033E-06  -.1988711E-06   .1145627E-05
   .2228190E-05   .2144504E-05   .1095037E-05   .1072121E-05   .1176330E-05
  -.2168337E-07  -.1587568E-05  -.2018871E-05  -.8222197E-06   .3525444E-06
   .4898154E-06  -.8844501E-06  -.1233329E-05   .1363565E-05   .3932985E-05
   .3963619E-05   .2265254E-05   .1091423E-06  -.1551039E-05  -.2159058E-05
  -.2009680E-05  -.1742722E-05  -.1470642E-05  -.6421165E-07   .3023024E-05
   .5855775E-05   .5297581E-05   .6471561E-06  -.3705013E-05  -.4025719E-05
  -.1156414E-05   .7315113E-06   .3386273E-06   .1001630E-05   .2926808E-05
   .3219843E-05   .3182090E-06  -.1840230E-05  -.1327485E-06   .3456470E-05
   .4184433E-05   .1962897E-05  -.3818060E-06  -.1795748E-06   .2582164E-05
   .3630967E-05   .2311418E-05   .1654271E-05   .3043473E-05   .2809147E-05
  -.1185627E-05  -.4743145E-05  -.4409131E-05  -.5535541E-06   .4169550E-05
   .6018826E-05   .4504164E-05   .2435831E-05   .1847369E-05   .2394656E-05
   .3250908E-05   .4279922E-05   .3218582E-05  -.5021502E-06  -.4578647E-05
  -.6467468E-05  -.7391438E-05  -.6603637E-05  -.2518023E-05   .1905196E-05
   .2361446E-05  -.3027009E-06  -.1216426E-05   .1271970E-05   .4773644E-05
   .4786817E-05   .2306840E-05   .1208247E-05   .2140870E-05   .3015749E-05
   .1497362E-05  -.1189135E-05  -.9538421E-06   .3118967E-05   .6646253E-05
   .7486441E-05   .6014388E-05   .3800537E-05   .2274932E-05   .4790117E-06
  -.1399564E-05  -.1337262E-05  -.2919509E-06   .1319605E-05   .4333268E-05
   .5818396E-05   .3363099E-05   .1913829E-06  -.1106746E-05  -.3566629E-06
   .4064584E-06   .9756318E-06   .2200457E-05   .2981738E-05   .2139725E-05
   .2673974E-05   .3736283E-05   .1008807E-05  -.2603890E-05  -.4182580E-05
  -.9821870E-06   .3777706E-05   .4015328E-05   .1736983E-05   .4716837E-06
  -.1851598E-05  -.4190246E-05  -.3036434E-05  -.2719596E-07   .4179491E-05
   .7951483E-05   .6225413E-05   .8688131E-06  -.2926432E-06   .1588997E-05
   .2859689E-05   .2875891E-05   .1242254E-05   .4668303E-06   .1051604E-05
  -.1098219E-05  -.4769124E-05  -.5442800E-05  -.2141359E-05   .3938378E-06
  -.3215150E-06  -.9975196E-06  -.6823635E-06   .7969455E-06   .2483707E-05
   .2033781E-05   .2120170E-06  -.2714295E-05  -.3601943E-05  -.1886776E-05
   .9327062E-06   .3090251E-05   .2215409E-05   .1466762E-05   .3966801E-05
   .5113395E-05   .3476732E-05   .3004454E-05   .4855129E-05   .2601697E-05
  -.2931387E-05  -.3687950E-05   .1426311E-05   .8427433E-05   .1246974E-04
   .1081142E-04   .5075545E-05  -.2638696E-05  -.7625094E-05  -.7156269E-05
  -.4425495E-05  -.1926620E-05   .2474481E-05   .6785477E-05   .7353720E-05
   .5369673E-05   .3780858E-05   .3793799E-05   .4509308E-05   .4349723E-05
   .1987443E-05  -.2896639E-07  -.7242950E-06   .4476782E-06   .3642018E-05
   .7381531E-05   .6205757E-05  -.1728510E-06  -.5000574E-05  -.3659332E-05
  -.6846683E-06  -.1163930E-05  -.3272308E-05  -.2007668E-05   .2477602E-05
   .6408968E-05   .9722519E-05   .1229520E-04   .1124877E-04   .7140138E-05
   .4005676E-05   .3000101E-05   .2200115E-05   .3914700E-05   .7534307E-05
   .9968805E-05   .6642956E-05  -.4788476E-06  -.3422272E-05  -.1989645E-05
   .1214359E-05   .3598216E-05   .2450731E-05   .9221018E-06   .2252866E-05
   .4785153E-05   .6051423E-05   .5100564E-05   .1212429E-05  -.3649287E-05
  -.6268378E-05  -.5549958E-05  -.1255027E-05   .3918491E-05   .6570686E-05
   .5726928E-05   .1309919E-05  -.3307441E-05  -.3219934E-05  -.1423392E-05
  -.1636178E-05  -.7407485E-06   .1475646E-05  -.1455672E-05  -.6529059E-05
  -.5627750E-05  -.1955670E-05  -.9692619E-06  -.8007297E-06  -.1257347E-05
  -.2679514E-05  -.6351818E-06   .5872747E-05   .8151307E-05   .5039721E-05
   .3017259E-05   .3331078E-05   .3752872E-05   .7853507E-05   .9823974E-05
   .6534506E-05   .4276186E-05   .8130602E-05   .1456188E-04   .1503419E-04
   .9455240E-05   .4509705E-05   .2376823E-05  -.2624590E-05  -.8633287E-05
  -.9189614E-05  -.4976638E-05  -.7070056E-05  -.1181337E-04  -.9323698E-05
  -.5280746E-05  -.2068244E-05   .3027830E-05   .9953981E-05   .1305209E-04
   .1014243E-04   .5942745E-05   .4501859E-05   .4768903E-05   .2694698E-05
   .1047895E-05   .2108955E-05   .2729879E-05   .6332052E-05   .1245526E-04
   .1134049E-04   .4944068E-05   .2003498E-05   .4796381E-05   .1095524E-04
   .1268781E-04   .6897569E-05   .4057872E-05   .6955995E-05   .9149398E-05
   .8908616E-05   .1023578E-04   .1140393E-04   .1032220E-04   .1072146E-04
   .1128997E-04   .9297255E-05   .7300244E-05   .8745243E-05   .6211820E-05
  -.5915025E-05  -.1785532E-04  -.1417060E-04   .4384828E-05   .2141146E-04
   .2446524E-04   .1286616E-04   .5135730E-07  -.4859951E-05  -.1570729E-05
   .4765546E-05   .8165594E-05   .8670394E-05   .1080093E-04   .1224730E-04
   .1174977E-04   .1561186E-04   .1824578E-04   .1364530E-04   .6838755E-05
   .3125827E-05  -.2037440E-06  -.4146475E-05  -.3273338E-05   .2733715E-05
   .6134694E-05  -.1322732E-05  -.1011707E-04  -.3426195E-05   .1248780E-04
   .1516829E-04   .2792664E-05  -.5433686E-05  -.1149813E-05   .6972507E-05
   .1101459E-04   .1301812E-04   .1292046E-04   .9850502E-05   .6711036E-05
   .3893110E-05  -.4114378E-05  -.1174573E-04  -.8263842E-05   .1626246E-05
   .5996500E-05   .7766618E-05   .1082173E-04   .1474064E-04   .1426988E-04
   .4043165E-05  -.1153749E-04  -.1933555E-04  -.1537775E-04  -.7521789E-05
   .1002941E-06   .3883000E-05  -.1787451E-05  -.6544157E-05  -.2553184E-05
   .1738373E-05   .3081364E-05   .5573373E-05   .1087832E-04   .1035890E-04
   .4966920E-05   .2918964E-05   .5364058E-05   .7225330E-05   .2594701E-05
  -.6004061E-05  -.1033189E-04  -.6104713E-05  -.6161725E-06   .2611233E-05
   .4401957E-05   .3119608E-06  -.1092268E-04  -.1743085E-04  -.9603644E-05
   .4445963E-05   .1216886E-04   .1006608E-04   .3110866E-05   .3640463E-05
   .1135475E-04   .1741664E-04   .1184024E-04  -.2653553E-05  -.1082390E-04
  -.1724278E-05   .1144220E-04   .1076760E-04   .1866158E-05  -.3452486E-05
   .3060393E-05   .1181450E-04   .9158509E-05   .9837321E-06  -.5190331E-05
  -.8608610E-05  -.9978213E-05  -.9212759E-05  -.2215125E-05   .9885458E-05
   .1183532E-04   .2210941E-05   .1774291E-05   .1341736E-04   .1648551E-04
   .8382912E-05   .3827488E-05   .1023583E-04   .1707653E-04   .1521007E-04
   .9120057E-05   .5828671E-05   .6717992E-05   .8543525E-05   .9154147E-05
   .7485358E-05   .1087545E-05  -.7683044E-05  -.1157629E-04  -.6677632E-05
  -.1952195E-05  -.3455442E-05  -.3055065E-05   .3002864E-05   .9370690E-05
   .9882127E-05   .4504811E-05   .3959663E-05   .5260628E-05   .6035862E-05
   .1064861E-04   .1050789E-04   .5592277E-05   .3950263E-05   .5418867E-05
   .3269283E-05  -.3024310E-06  -.2782635E-05  -.9899308E-06   .4938311E-05
   .9722890E-05   .1061919E-04   .9203493E-05   .8164045E-05   .8270591E-05
   .8834415E-05   .7926749E-05   .1327772E-05  -.6949915E-05  -.8612419E-05
  -.1087655E-04  -.1548064E-04  -.1509796E-04  -.6815797E-05  -.2369290E-05
  -.9986672E-05  -.1324126E-04  -.1556519E-05   .1653386E-04   .2397411E-04
   .1594741E-04   .2713229E-05   .3573214E-05   .1961143E-04   .3248314E-04
   .2708185E-04   .7462051E-05  -.4858972E-05   .6012812E-06   .1464181E-04
   .1512368E-04   .5041499E-06  -.7418702E-05  -.4250269E-06   .1003177E-04
   .1480564E-04   .1796692E-04   .1569673E-04   .1522844E-05  -.2889388E-05
   .1357072E-04   .3129415E-04   .3311759E-04   .2988489E-04   .2401560E-04
   .1105383E-04   .5605500E-05   .1172886E-04   .1969204E-04   .1668145E-04
   .1170111E-04   .1048703E-04   .5158384E-05   .1595519E-05   .1095242E-04
   .2557084E-04   .3052911E-04   .2987244E-04   .2027041E-04   .8082567E-05
   .9042205E-05   .1478745E-04   .7959826E-05  -.5494151E-05  -.1480706E-05
   .1842994E-04   .2841736E-04   .1870683E-04   .3955457E-06  -.5602262E-05
   .7831975E-05   .2100777E-04   .1945470E-04   .1175909E-04   .1270849E-04
   .1741903E-04   .1588039E-04   .1166607E-04   .1428299E-04   .1823404E-04
   .1560202E-04   .9749038E-05   .6636002E-05   .7405185E-05   .9077750E-05
   .9678828E-05   .7730411E-05   .2260197E-05   .7904853E-05   .2709280E-04
   .3319241E-04   .2923187E-04   .2339285E-04   .1531214E-04   .7211408E-05
   .8949380E-07   .5543694E-05   .2139239E-04   .2897000E-04   .2614009E-04
   .2004077E-04   .1876570E-04   .1854255E-04   .1564838E-04   .1510160E-04
   .1153874E-04   .1085971E-04   .1204753E-04   .8357071E-05   .1427228E-04
   .2521429E-04   .2926779E-04   .2297941E-04   .1183464E-04   .7031259E-05
   .1380747E-04   .2029637E-04   .1515957E-04   .8920870E-06  -.6605615E-05
  -.5530395E-06   .8652529E-05   .1362244E-04   .1816720E-04   .1951613E-04
   .1443521E-04   .8254406E-05   .7421247E-05   .1701098E-04   .2918887E-04
   .2851403E-04   .1580978E-04   .5302972E-05   .3742917E-05   .8947059E-05
   .1805484E-04   .2314070E-04   .2381955E-04   .2002711E-04   .1251032E-04
   .6993539E-05   .5981101E-05   .7608964E-05   .8769768E-05   .8586208E-05
   .9571459E-05   .1636490E-04   .2051571E-04   .1572397E-04   .8268182E-05
   .5097869E-05   .8126907E-05   .1720489E-04   .2170774E-04   .1431854E-04
  -.9016908E-06  -.7950030E-05  -.1151930E-05   .8672503E-05   .1042469E-04
   .8324514E-06  -.4163717E-05   .6361069E-05   .1031445E-04  -.8759506E-06
  -.3447199E-06   .1834916E-04   .2932191E-04   .1932827E-04  -.1498053E-05
  -.9009258E-05   .8309993E-05   .3135688E-04   .3393190E-04   .1788559E-04
   .3818800E-05   .2104611E-05   .5354839E-05   .1128874E-05  -.3779285E-05
  -.2524550E-06   .7064858E-05   .1241522E-04   .2064383E-04   .2865125E-04
   .1933002E-04   .5802006E-05   .1554076E-04   .3051727E-04   .2646174E-04
   .1118749E-04   .2118183E-05   .5202169E-05   .2094748E-04   .4225792E-04
   .4417077E-04   .2554097E-04   .1346675E-04   .1347923E-04   .1362629E-04
   .1186879E-04   .1599121E-04   .1980768E-04   .1544994E-04   .9866103E-05
   .1584883E-04   .3108285E-04   .3809609E-04   .1968049E-04  -.1064392E-04
  -.1836235E-04   .3818407E-05   .2636517E-04   .3399960E-04   .3492013E-04
   .3412189E-04   .3000955E-04   .3449238E-04   .4067116E-04   .2690007E-04
   .1094549E-04   .5696469E-05   .1810437E-05   .5252517E-05   .1489767E-04
   .2782294E-04   .4367070E-04   .4103637E-04   .1254713E-04  -.9217038E-05
   .2749136E-06   .2070385E-04   .3116996E-04   .2160799E-04  -.1022051E-04
  -.3615235E-04  -.2717775E-04   .7693214E-05   .2783810E-04   .1302952E-04
  -.5955581E-05   .1189904E-05   .1828518E-04   .1866274E-04   .2579174E-05
  -.1633752E-05   .9190923E-05   .1536690E-04   .1560709E-04   .2624178E-04
   .3394419E-04   .2571215E-04   .1788103E-04   .1739153E-04   .2257845E-04
   .2282936E-04   .1413351E-04   .7278886E-05   .1333518E-04   .2047183E-04
   .1649779E-04   .9417319E-05   .1334416E-04   .1944702E-04   .1782643E-04
   .2179704E-04   .4131469E-04   .5451749E-04   .4254292E-04   .2370217E-04
   .1324381E-04   .6597331E-05  -.2044032E-05  -.1262739E-05  -.7724855E-06
  -.1118848E-04  -.1312898E-04   .3374898E-05   .1208035E-04   .9858817E-06
  -.2646541E-04  -.5169874E-04  -.4379423E-04  -.1262389E-04   .1790109E-05
  -.1366900E-04  -.4100923E-04  -.4761634E-04  -.1650491E-04   .1674089E-04
   .1515476E-04  -.3095752E-05  -.1006726E-04  -.7343223E-05   .3208808E-05
   .6405253E-05  -.1189769E-05  -.1155314E-04  -.1228246E-04  -.1325770E-05
   .6663727E-05   .2123210E-05   .9270721E-06   .1166103E-05  -.2654502E-05
  -.1194547E-04  -.2185295E-04  -.1764789E-04  -.1618520E-05   .1085833E-04
   .1030899E-04  -.5165954E-05  -.2219643E-04  -.2046869E-04  -.5142577E-06
   .2277035E-04   .3184717E-04   .2744215E-04   .1047384E-04  -.4469552E-05
  -.8317630E-05  -.1779555E-04  -.2261570E-04  -.8196818E-05   .2032858E-04
   .3981734E-04   .2410376E-04  -.1387544E-04  -.3668478E-04  -.2805266E-04
  -.1091758E-04  -.1182088E-05   .3773394E-05   .6860176E-05   .8125059E-05
   .1052569E-04   .1289372E-04  -.1038593E-04  -.3534966E-04  -.3678304E-04
  -.2522693E-04  -.1191959E-04  -.7642572E-05  -.8718685E-05  -.1171949E-04
  -.9489526E-05   .2631202E-05   .2114697E-04   .2658499E-04   .7659271E-05
  -.1006924E-04  -.9475491E-05  -.8015612E-05  -.1605464E-04  -.1410104E-04
   .6514277E-05   .1564871E-04   .6650195E-05  -.2603745E-05  -.1147014E-04
  -.2504472E-04  -.4105970E-04  -.3639311E-04  -.1166542E-04  -.2956241E-05
  -.2599300E-04  -.4943814E-04  -.4325204E-04  -.8463961E-05   .1399858E-04
   .8136113E-05  -.1434063E-04  -.4151159E-04  -.4998508E-04  -.2801189E-04
   .3849912E-05   .1452744E-04  -.8640634E-05  -.2768918E-04  -.1791858E-04
  -.6483015E-05  -.1362390E-04  -.2878242E-04  -.3344099E-04  -.1851290E-04
   .4102727E-05   .1381197E-04   .2045927E-06  -.2338330E-04  -.3413030E-04
  -.2036494E-04   .1319350E-05   .4418416E-05  -.2826078E-05   .8149145E-06
   .1969377E-04   .3144332E-04   .2395331E-04   .7811469E-05  -.5861493E-05
   .1506202E-05   .1388016E-04  -.4656820E-05  -.3706420E-04  -.4634876E-04
  -.2107996E-04   .1726256E-04   .2357533E-04  -.6549721E-05  -.3384640E-04
  -.2519037E-04   .1529746E-04   .4764907E-04   .3544249E-04   .3155898E-05
  -.8709004E-05   .1937441E-05   .1173056E-04   .8223625E-06  -.2500400E-04
  -.4774744E-04  -.3819239E-04   .4968854E-05   .3392999E-04   .2164297E-04
   .6556155E-05   .5483303E-05  -.1357816E-04  -.4767781E-04  -.4997791E-04
  -.1513465E-04   .2014562E-04   .3487778E-04   .2029470E-04  -.3434903E-05
  -.1982766E-04  -.2364431E-04  -.2843068E-05   .1960521E-04   .1618380E-04
   .7290748E-05   .3674222E-05   .1193753E-04   .2287280E-04   .2175932E-04
   .1337826E-04   .5155069E-05  -.5039273E-05  -.1102613E-04  -.1538877E-04
  -.2411907E-04  -.2959695E-04  -.1890755E-04   .2582166E-05   .1380777E-04
   .3322398E-05  -.8289649E-05  -.3083174E-05   .7216471E-05   .1818750E-06
  -.1906539E-04  -.2130088E-04  -.2690808E-05   .1490855E-04   .2103213E-04
   .2413685E-04   .1500770E-04   .3722789E-05   .1287714E-04   .2732513E-04
   .2331640E-04   .7508362E-06  -.1823193E-04  -.3410850E-04  -.4745444E-04
  -.5657077E-04  -.5204183E-04  -.2523659E-04   .6170314E-05   .2067651E-04
   .1778467E-04   .7904651E-05  -.2875958E-05   .3975699E-05   .2305888E-04
   .3827241E-04   .3907979E-04   .3721473E-04   .4229222E-04   .3865626E-04
   .2522184E-04   .2235934E-04   .2341258E-04   .5274057E-05  -.1896742E-04
  -.8641466E-05   .3304584E-04   .6265018E-04   .4990308E-04   .4053524E-05
  -.3335685E-04  -.3066868E-04   .1080957E-05   .3331442E-04   .4046362E-04
   .2133557E-04  -.9338316E-05  -.3318678E-04  -.4336691E-04  -.4845481E-04
  -.4181480E-04  -.3552985E-04  -.2556944E-04  -.4725824E-05   .1062275E-04
   .1401647E-05  -.2396464E-04  -.3799952E-04  -.2678485E-04  -.1085139E-04
  -.1552692E-05   .5725278E-05   .1117437E-04   .1354147E-04   .1008362E-04
  -.2864176E-05  -.1004616E-04  -.1106936E-05   .8997598E-05   .2463123E-05
  -.9783853E-05  -.1397815E-04   .3253101E-05   .2216864E-04   .1296011E-04
  -.7448510E-05  -.2247455E-04  -.2555871E-04  -.3170262E-05   .2683641E-04
   .4661574E-04   .5340454E-04   .4185513E-04   .1749723E-04  -.5387307E-05
  -.8504520E-06   .2229796E-04   .4122094E-04   .3930420E-04   .2415802E-04
   .2201078E-04   .2715904E-04   .2327395E-04   .1611107E-04   .2242675E-04
   .2740318E-04   .9487717E-05  -.6542290E-05   .8291734E-05   .2712392E-04
   .1230371E-04  -.2415253E-04  -.4444659E-04  -.2880699E-04   .2912851E-05
   .2061209E-04   .1862270E-04   .1046982E-04   .7440146E-05   .9618894E-05
   .1195457E-04   .1477965E-04   .2886769E-04   .4746472E-04   .4864881E-04
   .3961491E-04   .2524311E-04   .4280826E-05  -.3138172E-05  -.1604592E-04
  -.3616211E-04  -.3239825E-04  -.2213698E-05   .2946795E-04   .2985298E-04
   .1878877E-04   .1633093E-04   .1918210E-04   .2896929E-04   .3262907E-04
   .2246220E-04   .1025970E-04   .2624418E-07  -.2206108E-04  -.3628898E-04
  -.2755582E-04   .2601442E-06   .1671583E-04   .2154652E-04   .2275274E-04
   .2359596E-04   .4525635E-04   .6868160E-04   .6159741E-04   .3977551E-04
   .2341256E-04   .1061283E-04  -.3211328E-05   .1547182E-05   .1860101E-04
   .2372414E-04   .1271396E-04  -.8382906E-05  -.1684359E-04  -.1895010E-05
   .2654378E-04   .3877149E-04   .2875085E-04   .2663107E-04   .4365370E-04
   .6192803E-04   .6375102E-04   .4603253E-04   .3118530E-04   .2461940E-04
   .1440177E-04  -.8608031E-05  -.3527328E-04  -.3991460E-04   .9264737E-05
   .7569217E-04   .7819595E-04   .3659928E-04   .4480208E-05  -.1243176E-04
  -.1339669E-04  -.4509627E-05  -.8778891E-05  -.2620681E-04  -.2424645E-04
   .9100397E-05   .3603556E-04   .3069341E-04   .1392766E-04   .1669966E-04
   .2705449E-04   .2670470E-04   .2743757E-04   .2724517E-04   .2170792E-04
   .2785176E-04   .4087204E-04   .3380415E-04   .2873162E-04   .2091635E-04
   .4611138E-05   .3248997E-05   .3693579E-04   .7218021E-04   .6281708E-04
   .2341647E-04  -.4188483E-05  -.1312640E-05   .2283740E-04   .3890170E-04
   .4320573E-04   .4929277E-04   .5418680E-04   .4220758E-04   .2046717E-04
   .2024031E-04   .3989440E-04   .4428923E-04   .2085056E-04  -.1336725E-04
  -.2617488E-04  -.7688673E-05   .2802933E-04   .5459243E-04   .5023562E-04
   .4096935E-04   .5528137E-04   .5723567E-04   .1822900E-04  -.1991805E-04
  -.1764151E-04   .1694168E-04   .3824048E-04   .2647826E-04   .1109226E-04
   .3271656E-04   .6618496E-04   .6356507E-04   .4271826E-04   .3243498E-04
   .1536004E-04  -.5734038E-05  -.7226097E-05   .1576958E-04   .3240385E-04
   .2342815E-04   .5841901E-05  -.8316146E-05  -.3210360E-04  -.4255731E-04
  -.2230579E-04   .7893669E-05   .3485817E-04   .5381981E-04   .5847449E-04
   .4082258E-04   .1353848E-04  -.5549521E-05  -.1574340E-04  -.2895711E-06
   .3081000E-04   .2513770E-04  -.1668249E-04  -.4165226E-04  -.3716383E-04
  -.1791254E-04   .1045386E-05   .5755005E-05  -.9525751E-05  -.1775825E-04
   .5015295E-05   .2839328E-04   .2884443E-04   .2161635E-04   .8523734E-05
   .6561358E-05   .1495855E-04   .1882113E-04   .2531377E-04   .2344359E-04
   .2151146E-05   .2082615E-05   .4313104E-04   .6641869E-04   .4081469E-04
   .5775922E-05   .5534630E-05   .1860240E-04   .4986853E-05  -.1344084E-04
   .3472364E-05   .4356851E-04   .6931671E-04   .6565420E-04   .3774891E-04
   .7591672E-05  -.5380333E-05   .8017061E-06   .2430961E-04   .4801541E-04
   .4083623E-04  -.3273819E-08  -.2582474E-04  -.3966210E-05   .2312868E-04
   .9730826E-05  -.1750439E-04  -.1692542E-04   .1347917E-04   .3703107E-04
   .4373209E-04   .4826755E-04   .5189078E-04   .3274620E-04  -.2404197E-04
  -.7168106E-04  -.5786311E-04   .5826471E-05   .6199678E-04   .7654723E-04
   .6062945E-04   .2802144E-04  -.1141107E-04  -.3300014E-04  -.3167029E-04
  -.2652689E-05   .4012311E-04   .6638865E-04   .6120391E-04   .1672829E-04
  -.3606055E-04  -.4809565E-04  -.1643914E-04   .1951216E-04  -.2309274E-05
  -.6650239E-04  -.8438503E-04  -.3891328E-04   .1046373E-04   .2209867E-04
   .1088616E-04   .1614386E-04   .3923267E-04   .4266661E-04   .2333368E-04
   .1118542E-04   .6412316E-05   .2379677E-04   .3394578E-04  -.3160985E-05
  -.2950562E-04  -.1310068E-04   .7237695E-05  -.7396414E-07  -.1012583E-05
   .2786765E-04   .5613973E-04   .5518365E-04   .5379567E-04   .6126108E-04
   .4435353E-04   .1528913E-05  -.1895002E-04  -.1333072E-04   .2938235E-05
   .2612194E-05  -.7826846E-05   .3820196E-05   .2095785E-04   .1589953E-04
  -.1699556E-04  -.4573148E-04  -.3155194E-04  -.7169646E-05  -.2251177E-05
  -.5338125E-05  -.4757057E-05  -.5442973E-06   .5051010E-05   .2259938E-04
   .4384394E-04   .4468297E-04   .3364067E-04   .2040976E-04   .9976773E-05
   .1618280E-04   .1978018E-04  -.6252920E-05  -.4352011E-04  -.4460145E-04
  -.1675471E-05   .3258804E-04   .2649851E-04  -.1093162E-05  -.2812604E-04
  -.3273570E-04  -.1160989E-04   .2073416E-04   .3289775E-04   .2055671E-04
   .1860702E-04   .3892177E-04   .5687212E-04   .4058182E-04  -.3110097E-05
  -.1827921E-04   .3791429E-05   .3219099E-04   .3557778E-04   .1044969E-04
  -.2399198E-04  -.3603173E-04  -.1592502E-04   .2255121E-04   .5158174E-04
   .4408766E-04   .1242273E-04  -.6557231E-05   .7235463E-05   .2415600E-04
   .2115160E-04   .2532372E-04   .5413144E-04   .6619757E-04   .5266422E-04
   .3927125E-04   .2599564E-04   .4954831E-05  -.2272992E-04  -.3763611E-04
  -.3489984E-04  -.1321547E-04  -.2651958E-05  -.1032782E-04  -.1406500E-04
  -.8147401E-05  -.8597327E-06   .7161045E-06  -.1651656E-05  -.4278592E-06
   .1815735E-04   .3928290E-04   .1923180E-04  -.3114084E-04  -.5196021E-04
  -.2832588E-04  -.8314467E-05  -.5145915E-04  -.1188851E-03  -.1268015E-03
  -.6618298E-04   .2766337E-05   .4259904E-04   .5278196E-04   .3548433E-04
   .7414367E-05  -.8977871E-05  -.8770282E-05  -.2339506E-05   .3126922E-06
   .2428231E-05   .1210496E-04   .5113154E-05  -.9885103E-05  -.3124563E-05
  -.1261881E-06  -.9994832E-05  -.1769731E-04  -.2686053E-04  -.2464467E-04
   .2758201E-05   .2846263E-04   .4089655E-04   .4524755E-04   .3664742E-04
   .2757669E-04   .1932805E-04   .6450737E-05   .2650014E-05   .3336458E-04
   .6798826E-04   .6094346E-04   .3298664E-04   .1153151E-04  -.3589608E-05
  -.2281446E-04  -.3220553E-04  -.1368218E-04   .3326096E-04   .5705379E-04
   .3216015E-04  -.8134815E-05  -.3730816E-04  -.3772542E-04  -.2086628E-04
  -.1168777E-04   .1619654E-04   .5398715E-04   .5358543E-04   .1393011E-04
  -.3185716E-04  -.4463212E-04  -.1981292E-04   .1869404E-04   .3242528E-04
   .1811449E-04   .1133760E-04   .1698942E-04   .3423319E-04   .6275912E-04
   .6272417E-04   .2862908E-04   .1122881E-04   .2646127E-04   .3435561E-04
   .1550603E-04  -.4147801E-05   .3586931E-05   .2139257E-04   .3533725E-04
   .4349585E-04   .3214255E-04   .6711838E-05  -.1483240E-04  -.3535295E-04
  -.5654074E-04  -.6965214E-04  -.6397063E-04  -.2236212E-04   .3558353E-04
   .6134861E-04   .2637795E-04  -.2330119E-04  -.3158911E-04   .6291427E-05
   .4752263E-04   .4589821E-04   .1133338E-04  -.1578239E-04  -.1450107E-04
   .1451793E-04   .4114379E-04   .1835343E-04  -.3670364E-04  -.5862240E-04
  -.3355523E-04  -.1711518E-05   .3458528E-05  -.2109004E-04  -.3770445E-04
  -.3394175E-04  -.4117110E-04  -.3145736E-04   .1078945E-04   .3577490E-04
   .2400825E-04   .1533408E-04   .2890768E-04   .2915045E-04  -.6338841E-05
  -.3351316E-04  -.1716771E-04   .1963674E-05   .9731762E-05   .1335395E-04
   .2440634E-04   .3667680E-04   .1206477E-04  -.3801577E-04  -.6083675E-04
  -.4816256E-04  -.1493306E-04  -.2505445E-05  -.1082060E-04  -.1789873E-05
   .1028930E-04  -.1073747E-04  -.4956741E-04  -.5672144E-04  -.3189199E-04
  -.1963516E-04  -.2298311E-04  -.2427655E-04  -.2986550E-04  -.3136593E-04
  -.2023997E-04  -.6762869E-05  -.1778040E-05  -.4297575E-05  -.1115149E-04
  -.3066742E-04  -.5402915E-04  -.4731380E-04  -.7777602E-05   .5081210E-05
  -.3069771E-04  -.6808283E-04  -.6459463E-04  -.4500888E-04  -.4562944E-04
  -.6157761E-04  -.7292340E-04  -.6830283E-04  -.4753395E-04  -.3256813E-04
  -.2940101E-04  -.3532360E-04  -.3406895E-04  -.2255578E-04  -.1934978E-04
  -.1192395E-04  -.1161413E-04  -.1490154E-04  -.1769034E-05  -.3557247E-05
  -.3625047E-04  -.6959166E-04  -.7910543E-04  -.7071196E-04  -.6237669E-04
  -.6204335E-04  -.6195286E-04  -.4487876E-04  -.1260060E-04   .2111065E-04
   .3066455E-04   .9403080E-05  -.3018006E-04  -.5646859E-04  -.3351691E-04
   .1189873E-04   .3616286E-04   .1416519E-04  -.2485894E-04  -.5116095E-04
  -.5951662E-04  -.4714454E-04  -.3473171E-04  -.2604744E-04  -.1467024E-04
  -.4267444E-05  -.7757649E-05  -.4458082E-04  -.8006511E-04  -.7433218E-04
  -.6002318E-04  -.4747264E-04  -.2112897E-04   .7948706E-05  -.3379976E-05
  -.2074933E-04  -.1104969E-04   .2620895E-06  -.1700517E-04  -.4913704E-04
  -.5221327E-04  -.2354583E-04  -.4441225E-05  -.3131228E-04  -.5415257E-04
  -.2216207E-04   .1397690E-04  -.1517113E-04  -.7416525E-04  -.9650205E-04
  -.7938278E-04  -.5490024E-04  -.3223577E-04  -.1177283E-04   .3255275E-05
   .2358842E-04   .4439502E-04   .4341613E-04   .3524021E-04   .3746785E-04
   .3218474E-04   .1150081E-04  -.6604875E-05  -.1843996E-04  -.4077466E-04
  -.4247080E-04  -.2342148E-04   .3543614E-05   .1930978E-04   .1567441E-04
   .1292752E-04  -.4431478E-05  -.3734612E-04  -.5120497E-04  -.4822923E-04
  -.5097031E-04  -.6117267E-04  -.6458744E-04  -.4896528E-04  -.3297035E-04
  -.3049706E-04  -.5093711E-04  -.5977450E-04  -.3064839E-04   .1685552E-04
   .3700157E-04   .2247962E-04   .1321010E-04   .1106262E-04  -.1621263E-04
  -.7009297E-04  -.1023338E-03  -.9111750E-04  -.6132874E-04  -.3412861E-04
  -.3383089E-04  -.6806522E-04  -.9157048E-04  -.6517966E-04  -.1530182E-04
   .1628624E-04   .2858987E-04   .2467406E-04   .5175576E-05  -.2712393E-04
  -.5813844E-04  -.6814953E-04  -.4288178E-04   .7214809E-05   .3490308E-04
   .2230791E-04  -.2917732E-05  -.9106094E-05   .8254385E-05   .8486329E-05
  -.1042728E-04  -.2232290E-04  -.2961918E-04  -.3184081E-04  -.3395825E-04
  -.3319475E-04  -.3350786E-04  -.3241456E-04  -.3322314E-04  -.3234719E-04
  -.3679909E-04  -.4806281E-04  -.4199265E-04  -.2118639E-04  -.1621285E-04
  -.2555280E-04  -.3283326E-04  -.1408022E-04   .1338604E-04   .1796656E-04
   .4535537E-05  -.1041250E-04  -.2980969E-04  -.4986335E-04  -.4139152E-04
  -.2386995E-05   .9428390E-05  -.2676777E-04  -.6414612E-04  -.5677570E-04
  -.2148179E-04  -.1328786E-04  -.4061503E-04  -.6538898E-04  -.4501020E-04
   .2638922E-04   .8413033E-04   .6336374E-04  -.2220566E-04  -.7511649E-04
  -.5077063E-04  -.5561976E-05  -.4176473E-05  -.4625521E-04  -.8890532E-04
  -.8485833E-04  -.4951808E-04  -.1795132E-04  -.1845453E-05   .4788984E-05
   .1482950E-04   .6643919E-05  -.1306922E-04  -.1779214E-04  -.1119148E-04
  -.1716179E-04  -.2501803E-04  -.2093483E-04  -.2595962E-04  -.3959716E-04
  -.2398199E-04   .1240646E-04   .3575686E-04   .1356511E-04  -.3556141E-04
  -.5206812E-04  -.2945812E-04  -.2200844E-04  -.5823824E-04  -.9284254E-04
  -.8946574E-04  -.6597215E-04  -.5223335E-04  -.5530899E-04  -.5559965E-04
  -.1996557E-04   .4211842E-04   .9025958E-04   .8084081E-04   .2406010E-04
  -.3227335E-04  -.4541962E-04  -.2361754E-04  -.1404176E-04  -.1813337E-04
  -.1886697E-04  -.2366580E-04  -.2519184E-04  -.1412390E-04  -.1000876E-05
   .7759305E-05   .2068157E-04   .2642286E-04   .1103525E-04  -.1681812E-04
  -.8922900E-05   .4540480E-04   .7318934E-04   .3448339E-04  -.4185475E-04
  -.7543354E-04  -.4306270E-04   .6142260E-05   .3292819E-04   .1492356E-04
  -.1714474E-04  -.2353858E-04  -.8639115E-05   .7443127E-05   .3048444E-04
   .6521665E-04   .6901847E-04   .3114757E-04  -.7378877E-05  -.1384267E-04
   .1570184E-04   .4944754E-04   .4739599E-04   .1161649E-04  -.2615081E-04
  -.1853592E-04   .2635318E-04   .4624231E-04   .2731684E-04   .1297219E-04
   .1295617E-04   .9800779E-05   .8224095E-06  -.2302830E-05   .1672449E-04
   .4388085E-04   .4329638E-04   .1141644E-04  -.2876671E-04  -.3789665E-04
  -.3160373E-05   .3122341E-04   .4871462E-04   .6596405E-04   .6039047E-04
   .2479268E-04  -.1177018E-04  -.3927442E-04  -.5503642E-04  -.4518822E-04
  -.1722417E-04  -.8897659E-06  -.1470054E-04  -.3063694E-04  -.2369271E-04
  -.2602399E-05   .2594175E-04   .4427255E-04   .2126835E-04  -.1717078E-04
  -.2757035E-04  -.1676673E-04  -.1097420E-04   .1633496E-04   .5170710E-04
   .3605144E-04  -.9975347E-05  -.2678439E-04   .1293810E-05   .3119769E-04
   .4308455E-04   .4520400E-04   .2800252E-04  -.1188272E-04  -.3753042E-04
  -.2814073E-04  -.5975431E-05   .4307815E-05  -.3298366E-05  -.2542305E-04
  -.3550593E-04  -.2587826E-04  -.1953220E-04  -.6236631E-05   .9514702E-05
   .1379945E-04   .1890532E-04   .1971818E-04   .8576435E-05  -.4853364E-05
  -.9642674E-05  -.1086024E-04  -.1959146E-04  -.1226339E-04   .3035769E-05
  -.7983185E-05  -.2649695E-04  -.2869194E-04  -.2513604E-04  -.8048998E-05
   .1075594E-04   .1529333E-04   .1157130E-04  -.1596165E-04  -.2906431E-04
  -.1069071E-04   .6662633E-05   .5834379E-05  -.4270060E-05  -.9362979E-05
  -.7870809E-05  -.9480949E-06   .1523681E-04   .2670775E-04   .3020555E-04
   .2255196E-04   .4900221E-05  -.4887350E-05   .1170075E-04   .4374531E-04
   .5999050E-04   .4062622E-04   .8053033E-05   .2990934E-05   .1307511E-04
   .1452368E-04   .1702762E-04   .1701501E-04   .6338490E-05  -.6202361E-05
  -.1110739E-04  -.8867479E-05  -.2463410E-05   .2070529E-04   .6327149E-04
   .8483349E-04   .5496772E-04   .7346185E-06  -.4547174E-04  -.6246309E-04
  -.2838391E-04   .3196178E-04   .6535113E-04   .4581450E-04   .1041542E-04
   .1768962E-04   .3857222E-04   .2358775E-04  -.1786706E-04  -.2775661E-04
  -.4414357E-05   .9736964E-05   .6254155E-05   .9507080E-05   .1099847E-04
  -.8867557E-05  -.1165167E-04   .1396660E-04   .1102624E-04  -.3099085E-04
  -.5451429E-04  -.3564870E-04  -.9796711E-05  -.1501318E-04  -.3091688E-04
  -.2795407E-04  -.8704048E-05   .2053301E-04   .4366586E-04   .3993826E-04
   .2911466E-04   .3510697E-04   .4647744E-04   .3565222E-04   .2121340E-05
  -.3509117E-04  -.4241156E-04  -.4316931E-05   .4151699E-04   .4152801E-04
  -.1161911E-04  -.6140533E-04  -.4370080E-04   .2251150E-04   .6572838E-04
   .5226971E-04   .2561574E-04   .1996706E-04   .5153973E-05  -.1939676E-04
  -.2356747E-04   .1895275E-05   .2174469E-04   .8813905E-05  -.2751863E-04
  -.4237062E-04  -.1192588E-04   .1956267E-04   .1671258E-04  -.9028053E-05
  -.3411002E-04  -.2126698E-04   .2139907E-04   .3816627E-04   .1822123E-04
   .1223615E-04   .4417905E-04   .6232649E-04   .4652906E-04   .1184514E-04
  -.2858319E-04  -.4473865E-04  -.3352484E-04  -.2809977E-04  -.3011572E-04
  -.2383441E-04  -.1610918E-04  -.2561024E-04  -.3185481E-04  -.1178302E-04
  -.3102596E-05  -.1201790E-04  -.4235103E-05   .1002540E-04   .1142817E-04
   .1259889E-04   .1951322E-04   .4018276E-04   .4938120E-04   .3767908E-04
   .1879181E-04   .1637749E-04   .3142661E-04   .3013757E-04   .9870235E-05
   .3361278E-05   .4266259E-05  -.1619382E-04  -.3276135E-04  -.1691954E-04
  -.2664970E-05   .6395465E-05   .2711851E-04   .4523553E-04   .3114778E-04
  -.1991673E-04  -.6694585E-04  -.6271492E-04  -.7493091E-05   .4875821E-04
   .6403881E-04   .3827498E-04   .9773479E-05  -.1539156E-04  -.3076434E-04
  -.2715332E-04  -.1099551E-04   .7974119E-05  -.2024689E-07  -.2375905E-04
  -.3034788E-04  -.2291472E-04  -.2749525E-04  -.3507352E-04  -.3153460E-04
  -.3659803E-04  -.5724261E-04  -.7587990E-04  -.8014235E-04  -.7138191E-04
  -.4773221E-04  -.1970858E-04  -.7975231E-05  -.2815985E-04  -.5477721E-04
  -.4352869E-04  -.1365104E-04   .1940561E-04   .1617616E-04  -.2572615E-04
  -.3688393E-04  -.1495276E-04  -.1562731E-04  -.4952972E-04  -.7294051E-04
  -.3958348E-04   .1927789E-04   .2938260E-04   .4022493E-05  -.2501403E-04
  -.4005534E-04  -.4444172E-04  -.3831225E-04  -.2166725E-04  -.1563197E-04
  -.4721929E-04  -.8834849E-04  -.8618506E-04  -.2278021E-04   .2226808E-04
   .8669047E-05  -.2279421E-04  -.4866500E-04  -.6179944E-04  -.5405131E-04
  -.4237871E-04  -.2849956E-04  -.3907008E-05   .2832383E-05   .1526545E-05
  -.9472886E-06  -.1972648E-04  -.3917722E-04  -.5132867E-04  -.6980553E-04
  -.1059815E-03  -.1037276E-03  -.3611135E-04   .2514161E-04   .2484673E-04
  -.2821783E-04  -.9124295E-04  -.1108399E-03  -.6690482E-04   .1295016E-06
   .1429549E-04  -.3241086E-04  -.7557122E-04  -.7021670E-04  -.4335859E-04
  -.2747175E-04  -.3596646E-04  -.5585277E-04  -.5242387E-04  -.2512810E-04
  -.5629241E-05  -.2153781E-04  -.5349039E-04  -.5986314E-04  -.5039935E-04
  -.4857634E-04  -.4556766E-04  -.4167782E-04  -.3693233E-04  -.3676837E-04
  -.4069407E-04  -.5819486E-04  -.6250892E-04  -.3956865E-04  -.2839099E-04
  -.4289919E-04  -.4376807E-04  -.1139652E-04   .1225625E-05  -.3154197E-04
  -.6742521E-04  -.6464899E-04  -.4259558E-04  -.2439480E-04  -.1199710E-04
  -.9424042E-05  -.2740212E-04  -.5342917E-04  -.4860847E-04  -.5053722E-05
   .2446728E-04  -.2256858E-05  -.5132353E-04  -.6151495E-04  -.2603744E-04
   .2063910E-04   .3113528E-04  -.2191126E-05  -.2297318E-04  -.2776375E-04
  -.4309850E-04  -.6401735E-04  -.7456372E-04  -.6865209E-04  -.4368492E-04
  -.1709886E-04  -.2097114E-04  -.4672192E-04  -.5453218E-04  -.4815396E-04
  -.5122669E-04  -.5903450E-04  -.5133730E-04  -.3834273E-04  -.2686553E-04
  -.1331275E-04  -.1127707E-04  -.3635287E-04  -.4435673E-04  -.3091734E-04
  -.1402251E-04   .7112274E-05   .5481313E-06  -.3390389E-04  -.5623543E-04
  -.7002059E-04  -.8398699E-04  -.9376258E-04  -.7370602E-04  -.3525341E-04
  -.3325334E-04  -.4677481E-04  -.3564092E-04  -.8895843E-05   .2125481E-05
  -.1236364E-04  -.1700495E-04  -.1856754E-04  -.3910815E-04  -.5995738E-04
  -.5462703E-04  -.3770007E-04  -.2357500E-04  -.7057476E-05   .1312072E-04
   .4786024E-05  -.3262737E-04  -.5221000E-04  -.4687440E-04  -.2828457E-04
  -.1210790E-04  -.2526453E-04  -.6575000E-04  -.7964738E-04  -.5769803E-04
  -.2876820E-04  -.2900691E-04  -.6675044E-04  -.9619696E-04  -.8521405E-04
  -.4277316E-04  -.3205287E-05   .1018497E-04  -.1815274E-06  -.2044984E-04
  -.1463392E-04   .8567358E-05   .1628004E-04   .2263689E-05  -.2472668E-04
  -.3167896E-04  -.9265165E-06   .2769948E-04   .1920843E-04  -.1777421E-04
  -.4196876E-04  -.4698912E-04  -.5172380E-04  -.5979551E-04  -.6546919E-04
  -.6162849E-04  -.4364110E-04  -.2978519E-04  -.2550139E-04  -.3743123E-04
  -.7114099E-04  -.8968951E-04  -.6143813E-04  -.1252816E-04   .1394439E-04
   .1063708E-04  -.5092203E-05  -.2901958E-04  -.4654701E-04  -.2539476E-04
   .1557114E-04   .3491942E-04  -.4910397E-05  -.6417040E-04  -.6509747E-04
  -.1334639E-04   .1279501E-05  -.2371912E-04  -.3520019E-04  -.3232118E-04
  -.2617870E-04  -.2449494E-04  -.7717573E-05   .1099252E-04  -.5148647E-05
  -.4151383E-04  -.5290850E-04  -.4070673E-04  -.2592438E-04  -.2084466E-04
  -.9931253E-05   .1688563E-05   .3015915E-04   .6735878E-04   .7661711E-04
   .5118473E-04   .2219538E-04  -.2984446E-06   .2537021E-05   .3480844E-04
   .6096516E-04   .4903754E-04   .1640788E-04   .8187387E-05   .1683233E-04
   .1544657E-04   .3211374E-05  -.2092920E-05   .1707084E-04   .4891689E-04
   .6788414E-04   .6356588E-04   .4030360E-04   .2393600E-04   .2476830E-04
   .4685642E-04   .5831559E-04   .4747563E-04   .2038176E-04  -.1024578E-04
   .2539939E-05   .3299319E-04   .3154830E-04   .6108345E-05  -.1208498E-04
  -.7628672E-05   .1616819E-04   .2893062E-04   .1571834E-04  -.1362006E-06
   .1158862E-04   .4412397E-04   .5928723E-04   .2193578E-04  -.3946324E-04
  -.5535668E-04  -.7161839E-05   .5038894E-04   .5193628E-04  -.1499237E-05
  -.4217167E-04  -.3389157E-04  -.8911705E-05  -.1432008E-04  -.4402793E-04
  -.5043048E-04  -.2451149E-04   .1774909E-05   .1117666E-04   .1879389E-04
   .2455906E-04   .3322880E-04   .4047186E-04   .2066222E-04   .5531427E-05
   .2121530E-04   .3293524E-04   .1812703E-04  -.6323156E-06   .6076986E-05
   .2320068E-04   .3383982E-04   .2695158E-04   .1001425E-04   .1760179E-04
   .5924896E-04   .8682595E-04   .5295042E-04  -.3387860E-04  -.9290286E-04
  -.5324999E-04   .4850218E-04   .1063475E-03   .6904784E-04  -.1047204E-04
  -.4061412E-04  -.3117081E-04  -.3230964E-04  -.3177512E-04  -.4361820E-06
   .3800992E-04   .2388262E-04  -.3125546E-04  -.6080127E-04  -.5317147E-04
  -.2593314E-04   .1440331E-04   .4702817E-04   .4258547E-04   .1811305E-04
   .2854101E-04   .6341454E-04   .7421480E-04   .4733165E-04   .2005920E-04
   .1252009E-04   .2183209E-04   .2072747E-04  -.9882134E-05  -.3574363E-04
  -.2602371E-04   .6900347E-05   .1108215E-04  -.1175929E-04  -.2739207E-04
  -.3121078E-04  -.1576684E-04  -.1538610E-04  -.5700022E-04  -.9650269E-04
  -.8508543E-04  -.4362288E-05   .9128588E-04   .1099404E-03   .2467477E-04
  -.6037065E-04  -.6625946E-04  -.3976502E-04  -.3475596E-04  -.3684917E-04
  -.2747128E-04  -.2882014E-04  -.4567388E-04  -.4667045E-04  -.2380561E-04
   .2002208E-05   .2631386E-04   .4472605E-04   .3006976E-04  -.2898105E-04
  -.6436135E-04  -.2847988E-04   .1383330E-04  -.7203009E-05  -.3011244E-04
  -.1668747E-05   .3390375E-04   .4737830E-04   .4567508E-04   .3237410E-04
   .2713117E-04   .3637076E-04   .3314250E-04   .1066241E-04  -.1017623E-04
  -.7679649E-05   .3322723E-04   .7129452E-04   .6465180E-04   .5258738E-04
   .5472401E-04   .4513040E-04   .3269183E-04   .3328362E-04   .2774569E-04
   .1180021E-04   .5402201E-05  -.1995122E-05  -.5186243E-05  -.1305854E-04
  -.2334657E-04  -.2057967E-04  -.1418562E-04  -.1928281E-04  -.1674583E-04
  -.1548372E-04  -.1670183E-04   .9757705E-06   .1736675E-04   .1548716E-04
   .1449571E-04   .1415700E-04   .8822326E-05   .8938913E-05   .6272638E-06
  -.2123342E-05   .4503423E-05   .4203284E-06  -.2266501E-04  -.4174064E-04
  -.4304747E-04  -.1719844E-04   .1103302E-04   .1629831E-04   .2023984E-04
   .3369902E-04   .3230780E-04   .6311037E-05  -.3766317E-04  -.8259047E-04
  -.8332790E-04  -.3897965E-04  -.6149663E-05  -.2948564E-04  -.5959268E-04
  -.4302230E-04   .7020161E-05   .3379877E-04   .2189012E-04   .3576182E-05
  -.3190959E-04  -.7367947E-04  -.8546461E-04  -.5227966E-04   .5039571E-05
   .3351028E-04   .1841709E-04  -.1199217E-04  -.3359169E-04  -.2063077E-04
   .6672633E-05   .1318567E-04  -.3403349E-05  -.2739625E-04  -.1811324E-04
   .2602289E-04   .5551305E-04   .2349074E-04  -.4414266E-04  -.8279576E-04
  -.6310020E-04  -.1790120E-04   .7289962E-05   .2828640E-06  -.2727130E-04
  -.4027560E-04  -.2922254E-04  -.2813656E-04  -.4587558E-04  -.4499944E-04
  -.3541798E-05   .4778269E-04   .6321494E-04   .2568319E-04  -.4512563E-05
   .1464464E-04   .4831882E-04   .4613698E-04   .7680961E-05  -.3546569E-04
  -.4724213E-04  -.2228279E-04   .1587777E-04   .3367476E-04   .3123245E-04
   .1825813E-04  -.3147116E-05  -.2584070E-04  -.2058279E-04   .6684547E-05
   .2626035E-04   .9132308E-05  -.2202256E-04  -.3260424E-04  -.3754535E-04
  -.5310400E-04  -.6205805E-04  -.3641065E-04  -.8008053E-05   .1212408E-04
   .3543052E-04   .5085019E-04   .3753524E-04   .9325019E-05   .3467784E-05
   .1516487E-04   .2768173E-04   .2434544E-04   .1285371E-05  -.3034444E-04
  -.4244587E-04  -.2563986E-04  -.1648042E-04  -.4976578E-04  -.5068109E-04
  -.1021581E-05   .4237875E-04   .3675373E-04  -.8671350E-05  -.2271960E-04
   .1580008E-04   .5193813E-04   .3251639E-04  -.2677397E-06  -.1183832E-04
  -.2204893E-04  -.3347399E-04  -.3865383E-04  -.1893966E-04   .8200306E-05
   .8408049E-05  -.1720733E-04  -.2173537E-04  -.1734930E-05   .8570794E-05
   .1067303E-05  -.9793258E-05  -.1621199E-04  -.2518279E-04  -.1178867E-04
   .2358301E-04   .4043128E-04   .3408798E-04   .2012495E-04   .2040475E-04
   .3892742E-04   .5233677E-04   .3686571E-04   .3807887E-05  -.1742097E-04
  -.1364079E-04   .3337509E-05  -.1515070E-04  -.4232885E-04  -.2390233E-04
   .1126330E-04   .1786154E-04  -.1138578E-06  -.1524907E-04  -.1543377E-04
  -.1244335E-04  -.2485956E-04  -.3145245E-04  -.7060711E-05   .2171617E-04
   .3361352E-04   .2659757E-04   .2330297E-04   .3347784E-04   .2702488E-04
  -.1125836E-04  -.4068076E-04  -.4094741E-04  -.5320646E-04  -.7148838E-04
  -.4608126E-04   .6026170E-06   .1795473E-04   .3593443E-05  -.1009216E-04
   .6177281E-05   .3699934E-04   .3566167E-04  -.8637908E-05  -.3979559E-04
  -.1739944E-04   .1666572E-04   .1830036E-04  -.2565974E-05  -.1362945E-04
   .7091958E-05   .3503484E-04   .2030824E-04  -.2177666E-04  -.5210128E-04
  -.4455948E-04  -.2416961E-05   .2586864E-04   .1587922E-04  -.4475125E-05
  -.2632794E-05  -.1217006E-04  -.5284540E-04  -.5965785E-04  -.1708575E-04
   .2519879E-04   .2051907E-04  -.3383379E-05  -.2704346E-04  -.4944624E-04
  -.5245610E-04  -.4439510E-04  -.3602955E-04  -.2916110E-04   .3308468E-05
   .3793382E-04   .4477758E-04   .3234251E-04   .3214059E-04   .2424175E-04
   .1075544E-04  -.3337853E-05  -.4406604E-04  -.8287060E-04  -.6897811E-04
  -.5036351E-05   .5441946E-04   .7200533E-04   .5994465E-04   .3981125E-04
   .7631212E-05  -.4847869E-05   .1678041E-04   .3002073E-04   .1340495E-04
  -.7184089E-05   .3282756E-05   .3660053E-04   .6022976E-04   .5743224E-04
   .3304596E-04   .1194959E-04  -.6552122E-05  -.8130073E-05  -.1227400E-05
  -.1564852E-04  -.3403428E-04  -.1635924E-04   .6597568E-04   .1271482E-03
   .8999926E-04   .7190657E-05  -.4210802E-04  -.4661638E-04  -.1384041E-04
   .3325303E-04   .5676747E-04   .4149092E-04   .1905274E-04   .2673286E-05
  -.2234838E-04  -.3823564E-04  -.3038697E-04  -.9019929E-05   .1114734E-04
   .5332569E-05  -.4137641E-05  -.1895073E-05  -.1601764E-05  -.3415106E-05
   .9912529E-05   .3707030E-04   .5201658E-04   .3823853E-04   .1899316E-04
   .7307336E-05  -.3727497E-05  -.4082853E-05   .1681783E-04   .8423299E-05
  -.1447286E-04  -.1615348E-04  -.8249874E-05  -.1739520E-05   .1276624E-04
   .4063414E-04   .6943105E-04   .5779505E-04  -.2858322E-05  -.4549200E-04
  -.2170235E-04   .3150219E-04   .4077438E-04  -.7081687E-05  -.4491673E-04
  -.2063534E-04   .3493523E-04   .5937307E-04   .2072547E-04  -.3474882E-04
  -.6207063E-04  -.4683238E-04  -.2692871E-05   .2715922E-04   .2696173E-04
  -.6298528E-07  -.1412183E-04  -.9173296E-05  -.1943140E-04  -.3054726E-04
  -.8396276E-05   .3085798E-04   .3761049E-04   .9130115E-05  -.2282595E-04
  -.3654159E-04  -.5263179E-05   .2695541E-04   .4975204E-05  -.3388150E-04
  -.4108626E-04  -.1786891E-04   .1392685E-04   .1936013E-04  -.1421969E-04
  -.4731616E-04  -.4997933E-04  -.5396975E-05   .3560072E-04   .2303898E-04
  -.2246828E-04  -.3453689E-04  -.6920433E-05   .2813217E-04   .4250987E-04
   .8179865E-05  -.5182251E-04  -.8858235E-04  -.8835469E-04  -.7409014E-04
  -.6009521E-04  -.2816254E-04   .8266815E-06  -.9813269E-05  -.3326729E-04
  -.3776889E-04  -.3657825E-04  -.3721440E-04  -.4229436E-04  -.4014631E-04
  -.2455649E-04  -.1330432E-04  -.2817247E-04  -.6027428E-04  -.7359923E-04
  -.3921952E-04   .6042239E-05   .1255818E-04  -.2476929E-04  -.6167113E-04
  -.4416698E-04  -.4119699E-05  -.7208020E-05  -.4977743E-04  -.8340383E-04
  -.8613312E-04  -.7332470E-04  -.6579594E-04  -.6442043E-04  -.4587646E-04
  -.6743734E-05   .1561746E-05  -.3598830E-04  -.7613489E-04  -.8353989E-04
  -.5321631E-04  -.2235443E-04  -.3629057E-04  -.6183516E-04  -.6404013E-04
  -.3820645E-04   .4740495E-05   .2975251E-04   .3215573E-04   .1469035E-04
  -.1707293E-04  -.1856474E-04   .1672908E-04   .3173332E-04  -.3003894E-05
  -.3605496E-04  -.1505439E-04   .3304324E-04   .4160717E-04  -.7928537E-05
  -.6693533E-04  -.8989925E-04  -.8014113E-04  -.6596762E-04  -.6349827E-04
  -.6496632E-04  -.4941469E-04  -.2048624E-04  -.5132736E-05  -.1962161E-04
  -.3898875E-04  -.5076282E-04  -.6066073E-04  -.6882407E-04  -.6445994E-04
  -.3206045E-04  -.8703866E-05  -.1159544E-04  -.1372171E-04   .1390110E-05
   .1477134E-05  -.1239473E-04  -.3612886E-05   .9418823E-05  -.4012301E-05
  -.1207318E-04  -.1977703E-05   .7713818E-05   .1850918E-04   .1224599E-04
  -.3240051E-04  -.6487811E-04  -.4703052E-04  -.1041214E-04   .6967214E-05
  -.3074127E-05  -.2560194E-04  -.1801754E-04   .2491009E-04   .5785766E-04
   .4551689E-04   .6314441E-05  -.2246837E-04  -.4077892E-04  -.6186180E-04
  -.8588392E-04  -.8202086E-04  -.5172730E-04  -.8659744E-05   .1856975E-04
   .9877891E-05  -.2751477E-04  -.6138981E-04  -.5614606E-04  -.2646346E-04
  -.2040434E-04  -.5046190E-04  -.8859938E-04  -.8733260E-04  -.5895339E-04
  -.4704346E-04  -.5379490E-04  -.4794403E-04  -.1867693E-04   .1521117E-04
   .5186937E-05  -.5302171E-04  -.8130150E-04  -.5190737E-04  -.2508731E-04
  -.3388197E-04  -.4583892E-04  -.5284485E-04  -.7416206E-04  -.8828108E-04
  -.5938406E-04   .1357327E-05   .3669863E-04   .1980649E-04  -.2025964E-04
  -.2860563E-04  -.1818069E-04  -.1000804E-04   .8050715E-05   .2057381E-04
   .1302631E-04  -.6156890E-05  -.3644500E-04  -.7768665E-04  -.9918256E-04
  -.8347946E-04  -.4605333E-04  -.2488308E-04  -.2108480E-04  -.1925008E-04
  -.2541241E-04  -.3193487E-04  -.4044063E-04  -.5093051E-04  -.4335450E-04
  -.1459338E-04   .2095404E-04   .2943315E-04  -.7483423E-05  -.4952434E-04
  -.3779406E-04   .4661096E-05   .2211327E-04   .1262342E-04   .1131642E-04
   .1714647E-04   .1162230E-04   .3033537E-05   .7891439E-05   .1981890E-05
  -.1069268E-04  -.3036883E-05   .2908492E-05   .7274362E-05   .1209491E-04
   .5928261E-06  -.4279385E-04  -.8840311E-04  -.1091135E-03  -.9881278E-04
  -.7712739E-04  -.7298841E-04  -.6606439E-04  -.4851464E-04  -.2686128E-04
  -.3696563E-05   .2066458E-04   .3282274E-04   .3019252E-04   .5671471E-05
  -.2378699E-04  -.4409180E-04  -.5773095E-04  -.6077977E-04  -.4246686E-04
  -.1602507E-04  -.1704302E-04  -.4476511E-04  -.6887350E-04  -.6882609E-04
  -.4514049E-04  -.3072238E-04  -.3904991E-04  -.4283407E-04  -.4160477E-04
  -.4837773E-04  -.5985289E-04  -.6188452E-04  -.4527782E-04  -.2593617E-04
  -.1431451E-05   .2164237E-04   .3863516E-04   .5724253E-04   .7780652E-04
   .7230593E-04   .4990193E-04   .3557305E-04   .1087683E-04  -.1852586E-04
  -.4567519E-04  -.7345737E-04  -.6630320E-04  -.7831432E-05   .5615840E-04
   .7749316E-04   .4855841E-04   .2032256E-05  -.3322700E-04  -.4077734E-04
  -.3496795E-04  -.2466827E-04  -.6598165E-05   .1984989E-04   .2760793E-04
  -.1734955E-05  -.3295783E-04  -.4788055E-04  -.5104480E-04  -.4436698E-04
  -.5026789E-04  -.5476024E-04  -.4659242E-04  -.2790426E-04  -.6628246E-05
   .4475744E-05   .4196819E-05   .2895259E-07  -.5214068E-05  -.2331574E-04
  -.4694430E-04  -.3739168E-04   .2101177E-04   .6566194E-04   .6249190E-04
   .3380833E-04   .2317185E-04   .3818792E-04   .4454150E-04   .3814645E-04
   .2394350E-04   .7058805E-05  -.6682038E-05  -.2688701E-04  -.4825592E-04
  -.4415664E-04  -.1683698E-04   .5700799E-05   .5475950E-05  -.2104305E-04
  -.5077394E-04  -.4412563E-04   .1942305E-05   .3857117E-04   .5278007E-04
   .7116631E-04   .8484122E-04   .7850619E-04   .5919656E-04   .3180434E-04
   .5408039E-05  -.3508146E-05   .1317121E-04   .2720339E-04   .1803808E-04
  -.2107719E-06  -.1624338E-05   .3661664E-04   .7141744E-04   .4738950E-04
   .4188072E-05  -.2318587E-04  -.1988800E-04   .3254052E-04   .9809941E-04
   .1157349E-03   .8404915E-04   .5471173E-04   .6362652E-04   .8308599E-04
   .7631465E-04   .3942805E-04   .4021095E-05   .4274946E-05   .1857885E-04
   .1247001E-04  -.1830024E-04  -.3677703E-04  -.2504486E-04   .3741222E-05
   .4341912E-04   .6056437E-04   .4767225E-04   .2597727E-04   .1569495E-04
  -.3044120E-05  -.4024038E-04  -.6686706E-04  -.4319289E-04   .4030514E-04
   .9082864E-04   .5415787E-04  -.2838810E-04  -.9678902E-04  -.1108998E-03
  -.7999237E-04  -.3124687E-04   .1977081E-04   .5616615E-04   .6368221E-04
   .4655071E-04   .4324261E-04   .4328575E-04   .2307250E-04   .9087224E-06
   .9653558E-05   .3175868E-04  -.2108101E-05  -.8087349E-04  -.1251254E-03
  -.1147067E-03  -.7010487E-04  -.3362757E-04  -.1502853E-04   .1209084E-04
   .3941498E-04   .2154960E-04  -.3135039E-04  -.5045268E-04  -.1156862E-04
   .3605450E-04   .6555561E-04   .5472323E-04  -.1452099E-05  -.6660608E-04
  -.1274085E-03  -.1640495E-03  -.1273900E-03  -.4127245E-04   .2151355E-04
   .4130573E-04   .2524340E-04  -.1354764E-04  -.3217181E-04  -.1366276E-05
   .4809435E-04   .7785727E-04   .8177460E-04   .5038711E-04   .3583957E-04
   .7656905E-04   .1357627E-03   .1426011E-03   .9317369E-04   .4359025E-04
   .1576415E-04  -.1323808E-05  -.2346233E-04  -.3025637E-04   .5244827E-06
   .5346617E-04   .1086707E-03   .1164056E-03   .4121703E-04  -.7144046E-04
  -.1404879E-03  -.1256565E-03  -.4984603E-04   .5013325E-04   .1355564E-03
   .1616134E-03   .1096381E-03  -.4928133E-05  -.1106485E-03  -.1274649E-03
  -.4821034E-04   .4737031E-04   .8670142E-04   .6631658E-04   .6042147E-05
  -.5466442E-04  -.8070751E-04  -.7910208E-04  -.7876825E-04  -.6860733E-04
  -.4879082E-04  -.2708721E-04  -.1560906E-04  -.4529956E-04  -.9796183E-04
  -.1160254E-03  -.8583832E-04  -.3995781E-04  -.9430267E-05   .4687605E-04
   .1346595E-03   .1957662E-03   .2003404E-03   .1540787E-03   .7824961E-04
   .2284506E-04   .4317752E-05   .4644247E-05   .2447183E-04   .6801530E-04
   .1077530E-03   .1103545E-03   .8588874E-04   .2996405E-04  -.3652090E-04
  -.5853242E-04  -.3213366E-04   .3060502E-05   .3001258E-04   .4881209E-04
   .5774505E-04   .5811812E-04   .5540873E-04   .5026429E-04   .3483863E-04
   .2684795E-04   .3121382E-04   .9240381E-05  -.3689809E-04  -.5513088E-04
  -.2845529E-04   .1968019E-04   .5952224E-04   .8746280E-04   .1083388E-03
   .1116599E-03   .7035006E-04  -.8670029E-05  -.6895750E-04  -.6713961E-04
  -.1821530E-04   .4657269E-04   .8416477E-04   .7761252E-04   .5519868E-04
   .3760920E-04  -.1480565E-06  -.6525942E-04  -.1100142E-03  -.1209640E-03
  -.1142151E-03  -.7594585E-04  -.6064345E-05   .6118152E-04   .1147249E-03
   .1405052E-03   .1302888E-03   .8634566E-04   .1188451E-04  -.5857591E-04
  -.8078824E-04  -.3911940E-04   .1565803E-04   .4797871E-04   .7067115E-04
   .7947839E-04   .6541281E-04   .3042763E-04   .2884298E-05   .2693182E-04
   .8646947E-04   .1312245E-03   .1420581E-03   .9725998E-04   .2168775E-04
  -.2990128E-04  -.5095515E-04  -.6531014E-04  -.8500324E-04  -.8178615E-04
  -.6062213E-04  -.5652634E-04  -.8133205E-04  -.9729881E-04  -.6541013E-04
   .5674177E-05   .7908051E-04   .1241960E-03   .1446002E-03   .1393818E-03
   .9575425E-04   .1114064E-04  -.8789545E-04  -.1612385E-03  -.1816618E-03
  -.1632674E-03  -.1105226E-03  -.5753586E-04  -.4326000E-04  -.6260141E-04
  -.9015767E-04  -.8427525E-04  -.6154218E-04  -.6444993E-04  -.6492705E-04
  -.4477758E-04  -.5068862E-04  -.1021479E-03  -.1804772E-03  -.2517069E-03
  -.3150638E-03  -.3771784E-03  -.4037530E-03  -.3644742E-03  -.2726373E-03
  -.1818381E-03  -.1140717E-03  -.7356755E-04  -.8251459E-04  -.1472301E-03
  -.2003583E-03  -.1737204E-03  -.1052070E-03  -.3561866E-04   .3751444E-04
   .9019513E-04   .1086674E-03   .9569414E-04   .7448019E-04   .6431604E-04
   .2331474E-04  -.3499681E-04  -.7865457E-04  -.8722897E-04  -.4919392E-04
   .1882774E-04   .8719294E-04   .1342245E-03   .1791617E-03   .2185435E-03
   .2111021E-03   .1717904E-03   .1335561E-03   .9673098E-04   .7343203E-04
   .9328977E-04   .1385292E-03   .1809608E-03   .1847488E-03   .1406179E-03
   .6711086E-04   .6177752E-05   .1522139E-05   .3036573E-04   .1794056E-04
  -.4758035E-04  -.8549967E-04  -.7232033E-04  -.4885152E-04  -.2215964E-04
   .2213531E-04   .3492499E-04   .2467771E-05  -.4467548E-04  -.9731923E-04
  -.1705040E-03  -.2526862E-03  -.2847528E-03  -.2265608E-03  -.1238442E-03
  -.6586829E-04  -.6404423E-04  -.7413852E-04  -.6392301E-04  -.1983553E-04
   .2848993E-04   .7021966E-04   .1134243E-03   .1751675E-03   .2449602E-03
   .2586193E-03   .1966018E-03   .1290926E-03   .1420631E-03   .2290975E-03
   .3152454E-03   .3697654E-03   .3868490E-03   .3746174E-03   .3509494E-03
   .2994742E-03   .2151580E-03   .1667067E-03   .1847321E-03   .2062809E-03
   .1776190E-03   .1234399E-03   .9000404E-04   .7108836E-04   .3804790E-04
  -.2013689E-05  -.1989222E-04   .4659842E-05   .5757626E-04   .9354740E-04
   .1257534E-03   .1863178E-03   .2414240E-03   .3010781E-03   .3771668E-03
   .4410662E-03   .4531050E-03   .4042326E-03   .3191836E-03   .2074180E-03
   .9121356E-04   .8667947E-05  -.9224438E-05   .1618840E-04   .2176650E-04
  -.2412480E-04  -.1046394E-03  -.1908769E-03  -.2373555E-03  -.2266137E-03
  -.1776979E-03  -.1180071E-03  -.7778200E-04  -.6409871E-04  -.6264845E-04
  -.1053184E-03  -.2137359E-03  -.3360230E-03  -.4031902E-03  -.4047086E-03
  -.3744862E-03  -.3213054E-03  -.2464883E-03  -.1755224E-03  -.1462193E-03
  -.1511305E-03  -.1695921E-03  -.1842909E-03  -.1774336E-03  -.1641894E-03
  -.1529294E-03  -.1295876E-03  -.6259644E-04   .2430173E-04   .7331591E-04
   .6865151E-04   .2988749E-04  -.3777714E-05   .6277381E-05   .5229759E-04
   .6640778E-04   .2857031E-04  -.1818736E-04  -.4561219E-04  -.4685066E-04
  -.3691780E-04  -.1326586E-04   .8700733E-05   .1198767E-04   .1461209E-04
   .3955854E-05  -.6328475E-04  -.1696636E-03  -.2928040E-03  -.4289315E-03
  -.5214516E-03  -.5309641E-03  -.4696003E-03  -.3647309E-03  -.2765934E-03
  -.2252629E-03  -.1920951E-03  -.1520624E-03  -.7658063E-04   .3487419E-04
   .1451620E-03   .2240498E-03   .2663028E-03   .2558150E-03   .1972719E-03
   .1101084E-03   .5227208E-04   .2763121E-04  -.6796333E-05  -.5060684E-04
  -.7210309E-04  -.5530965E-04  -.3890282E-04  -.6789668E-04  -.1268606E-03
  -.1469681E-03  -.1210569E-03  -.7686951E-04  -.1904229E-04   .2214931E-04
   .2295311E-04   .1389816E-04   .5499587E-04   .1253180E-03   .1698855E-03
   .1646625E-03   .1319935E-03   .1063008E-03   .9383036E-04   .1161699E-03
   .1780614E-03   .2408479E-03   .2805280E-03   .2949414E-03   .2721150E-03
   .2038561E-03   .1250062E-03   .7498521E-04   .6867284E-04   .7715772E-04
   .6047385E-04  -.1894304E-04  -.1490298E-03  -.2641559E-03  -.3480852E-03
  -.3852269E-03  -.3482931E-03  -.2670426E-03  -.1836237E-03  -.1244747E-03
  -.9274931E-04  -.9136373E-04  -.1042189E-03  -.7673657E-04   .2808734E-04
   .2030039E-03   .3756243E-03   .4805218E-03   .5237987E-03   .5306096E-03
   .4966740E-03   .4401845E-03   .4182815E-03   .4916254E-03   .6250812E-03
   .7690148E-03   .9300952E-03   .1077005E-02   .1131894E-02   .1058666E-02
   .8862014E-03   .6788968E-03   .5402251E-03   .4965315E-03   .4709587E-03
   .4284890E-03   .4010006E-03   .3748202E-03   .2940887E-03   .1297656E-03
  -.6878738E-04  -.2366681E-03  -.3657634E-03  -.4583629E-03  -.5189990E-03
  -.5352522E-03  -.5316382E-03  -.5411140E-03  -.5903111E-03  -.6514823E-03
  -.6839356E-03  -.6750361E-03  -.6475098E-03  -.6561531E-03  -.7501695E-03
  -.9142248E-03  -.1057734E-02  -.1137589E-02  -.1156670E-02  -.1099286E-02
  -.9878707E-03  -.8821161E-03  -.8183114E-03  -.8136449E-03  -.8510804E-03
  -.8510714E-03  -.7450225E-03  -.5467130E-03  -.3155118E-03  -.1133792E-03
   .4973224E-04   .2004015E-03   .3314302E-03   .4163394E-03   .4538414E-03
   .4978784E-03   .5998078E-03   .7136914E-03   .7705574E-03   .7749956E-03
   .7563510E-03   .7345081E-03   .7371960E-03   .8155488E-03   .9549962E-03
   .1094939E-02   .1200766E-02   .1232386E-02   .1149440E-02   .9683824E-03
   .7504256E-03   .5321965E-03   .3294625E-03   .1568186E-03   .6099731E-05
  -.1309159E-03  -.2460788E-03  -.3628753E-03  -.5077504E-03  -.6493160E-03
  -.7365323E-03  -.7456853E-03  -.7090631E-03  -.6722356E-03  -.6371531E-03
  -.6389720E-03  -.7220378E-03  -.8464519E-03  -.9555320E-03  -.9898733E-03
  -.9259161E-03  -.7919710E-03  -.6502205E-03  -.5355642E-03  -.4394321E-03
  -.3705302E-03  -.3486114E-03  -.3636660E-03  -.3395653E-03  -.2195094E-03
  -.2504799E-05   .2428405E-03   .4215414E-03   .5174537E-03   .5685591E-03
   .5836148E-03   .5757988E-03   .5929827E-03   .6474703E-03   .7254587E-03
   .8077390E-03   .8781738E-03   .9289922E-03   .9416471E-03   .9166953E-03
   .8733591E-03   .8337035E-03   .8023271E-03   .7570992E-03   .6200126E-03
   .3866292E-03   .1615408E-03   .4165644E-04   .5419932E-04   .1335257E-03
   .2000238E-03   .2389558E-03   .3141391E-03   .4430474E-03   .5782820E-03
   .6703163E-03   .6848473E-03   .6308386E-03   .5431120E-03   .4318706E-03
   .3238179E-03   .2686690E-03   .2452512E-03   .1931590E-03   .8906526E-04
  -.1279820E-04  -.9270436E-04  -.1780562E-03  -.2863499E-03  -.3656154E-03
  -.3565275E-03  -.2917422E-03  -.2919884E-03  -.4259829E-03  -.6501544E-03
  -.8979034E-03  -.1077443E-02  -.1085998E-02  -.9292719E-03  -.7391428E-03
  -.6331232E-03  -.6223923E-03  -.6149083E-03  -.5773125E-03  -.5421876E-03
  -.5018059E-03  -.4301983E-03  -.3103132E-03  -.1631037E-03  -.4779845E-04
  -.1548401E-04  -.5091625E-04  -.1018217E-03  -.1097477E-03  -.4927228E-04
   .4891888E-04   .1936040E-03   .3939953E-03   .6036063E-03   .7558458E-03
   .8193444E-03   .7958286E-03   .7190010E-03   .5964009E-03   .4383835E-03
   .2836407E-03   .1565368E-03   .6898001E-04   .1677789E-04  -.5140704E-04
  -.1671312E-03  -.2874130E-03  -.3445950E-03  -.3040144E-03  -.1965591E-03
  -.6336764E-04   .5644357E-04   .1318938E-03   .1379175E-03   .6117767E-04
  -.8143801E-04  -.2186162E-03  -.2667821E-03  -.2119019E-03  -.9696112E-04
   .2478602E-04   .1102305E-03   .1583400E-03   .1713978E-03   .1893705E-03
   .2249682E-03   .2518264E-03   .2314386E-03   .1431717E-03  -.1755930E-04
  -.1821437E-03  -.2694664E-03  -.2655939E-03  -.2135059E-03  -.1480710E-03
  -.9441507E-04  -.7931915E-04  -.1315782E-03  -.2475455E-03  -.3194637E-03
  -.2443998E-03  -.4031007E-04   .2041027E-03   .4058203E-03   .5337609E-03
   .5906183E-03   .6004521E-03   .6073242E-03   .6271746E-03   .6439293E-03
   .6528901E-03   .6873733E-03   .7595824E-03   .8461771E-03   .9264607E-03
   .9730386E-03   .1015142E-02   .1127809E-02   .1298328E-02   .1424393E-02
   .1447185E-02   .1380939E-02   .1234406E-02   .1003527E-02   .6751782E-03
   .2725579E-03  -.1021138E-03  -.3398847E-03  -.4192089E-03  -.4134500E-03
  -.4019206E-03  -.4360062E-03  -.4862510E-03  -.5408159E-03  -.6145430E-03
  -.6915802E-03  -.7355257E-03  -.7193631E-03  -.6581204E-03  -.6103463E-03
  -.6265340E-03  -.7001568E-03  -.8711033E-03  -.1110630E-02  -.1333620E-02
  -.1482585E-02  -.1539390E-02  -.1493803E-02  -.1381740E-02  -.1263038E-02
  -.1137751E-02  -.1020058E-02  -.9138325E-03  -.7772553E-03  -.5880708E-03
  -.3235026E-03  -.5227171E-05   .3023264E-03   .5445794E-03   .7498410E-03
   .9656384E-03   .1152161E-02   .1258112E-02   .1289629E-02   .1250371E-02
   .1139432E-02   .1007335E-02   .8669187E-03   .6954688E-03   .5163295E-03
   .4205662E-03   .4194119E-03   .4260505E-03   .3822484E-03   .2976061E-03
   .2066517E-03   .1585299E-03   .1730797E-03   .2477161E-03   .3792421E-03
   .5289625E-03   .6343419E-03   .6951282E-03   .7430431E-03   .7629346E-03
   .7325484E-03   .6884931E-03   .6951099E-03   .7266978E-03   .7053434E-03
   .6285405E-03   .5417384E-03   .4958207E-03   .4810523E-03   .4407772E-03
   .3706579E-03   .2703613E-03   .8770561E-04  -.1772325E-03  -.4832503E-03
  -.7832110E-03  -.1039583E-02  -.1223076E-02  -.1297221E-02  -.1236497E-02
  -.1078032E-02  -.8931134E-03  -.7210975E-03  -.5328350E-03  -.3129092E-03
  -.9446289E-04   .9811083E-04   .2683239E-03   .4132298E-03   .4959127E-03
   .4943675E-03   .4301735E-03   .2885968E-03   .5809417E-04  -.2060128E-03
  -.3965459E-03  -.4550712E-03  -.4637726E-03  -.5023671E-03  -.5620104E-03
  -.5918217E-03  -.5836181E-03  -.5265769E-03  -.3614801E-03  -.6616266E-04
   .2694784E-03   .5199040E-03   .6360833E-03   .6096444E-03   .4813914E-03
   .3477284E-03   .2790146E-03   .2770824E-03   .3481657E-03   .4474043E-03
   .4886403E-03   .4501965E-03   .3418202E-03   .1843440E-03   .4785009E-04
   .9379472E-05   .2885478E-04   .2704850E-04  -.1567494E-04  -.6939239E-04
  -.1422832E-03  -.2887631E-03  -.4805137E-03  -.6620086E-03  -.8378995E-03
  -.9947788E-03  -.1059352E-02  -.1009168E-02  -.8601819E-03  -.6403978E-03
  -.4016550E-03  -.1796215E-03   .6939366E-05   .1566328E-03   .2593103E-03
   .3250417E-03   .3742715E-03   .4225294E-03   .4313368E-03   .3598301E-03
   .2443578E-03   .1505051E-03   .1192658E-03   .1783145E-03   .3659187E-03
   .6998607E-03   .1116184E-02   .1455206E-02   .1617041E-02   .1642343E-02
   .1536713E-02   .1267827E-02   .9271880E-03   .6582907E-03   .5299488E-03
   .5325907E-03   .6263262E-03   .7630850E-03   .8399274E-03   .7326758E-03
   .4290010E-03   .7278246E-04  -.1659665E-03  -.2551979E-03  -.2409624E-03
  -.1572953E-03  -.8795727E-04  -.1321039E-03  -.2874878E-03  -.4723710E-03
  -.5879314E-03  -.5810622E-03  -.4546440E-03  -.2494472E-03  -.4559331E-04
   .6583057E-04  -.1651907E-04  -.3140430E-03  -.6786385E-03  -.9400885E-03
  -.1032626E-02  -.1001946E-02  -.9543990E-03  -.9334717E-03  -.9091820E-03
  -.8476571E-03  -.7359879E-03  -.5874145E-03  -.3669624E-03  -.7641704E-04
   .1909046E-03   .3291281E-03   .3201379E-03   .2476282E-03   .1991975E-03
   .2522986E-03   .4398370E-03   .6910615E-03   .9303766E-03   .1108217E-02
   .1213938E-02   .1267717E-02   .1318868E-02   .1402148E-02   .1489836E-02
   .1552719E-02   .1553492E-02   .1494012E-02   .1433026E-02   .1372487E-02
   .1280803E-02   .1114109E-02   .8236368E-03   .4290632E-03   .5970357E-05
  -.3569547E-03  -.6128758E-03  -.7380429E-03  -.7357117E-03  -.6583798E-03
  -.5786032E-03  -.5528474E-03  -.5946231E-03  -.7246149E-03  -.9174394E-03
  -.1114750E-02  -.1281947E-02  -.1386651E-02  -.1429218E-02  -.1433676E-02
  -.1404734E-02  -.1321707E-02  -.1146596E-02  -.8403373E-03  -.4363037E-03
  -.6009397E-04   .2135716E-03   .3686582E-03   .4051645E-03   .3567411E-03
   .2374888E-03   .7119306E-04  -.1124270E-03  -.3030863E-03  -.4715523E-03
  -.6032011E-03  -.6887000E-03  -.7252160E-03  -.6900850E-03  -.5465459E-03
  -.3071882E-03  -.4517249E-04   .1666927E-03   .3674654E-03   .5678277E-03
   .6934354E-03   .6736869E-03   .5479723E-03   .4267878E-03   .3843231E-03
   .4324135E-03   .5011367E-03   .5031869E-03   .4649260E-03   .4806504E-03
   .5787375E-03   .7442482E-03   .9448495E-03   .1136883E-02   .1278045E-02
   .1376669E-02   .1487154E-02   .1617101E-02   .1686650E-02   .1601677E-02
   .1316710E-02   .8620351E-03   .3428079E-03  -.6666792E-04  -.2678605E-03
  -.2448471E-03  -.1531887E-04   .3207886E-03   .6033065E-03   .7369376E-03
   .7515749E-03   .7375633E-03   .7322839E-03   .7266922E-03   .7168400E-03
   .7159381E-03   .7483933E-03   .7791061E-03   .7330784E-03   .5682509E-03
   .3272349E-03   .1155594E-03  -.1391373E-04  -.3317137E-04   .7070441E-04
   .2268633E-03   .3003884E-03   .2402643E-03   .1013431E-03  -.6487265E-04
  -.2613175E-03  -.5069739E-03  -.7608015E-03  -.9709033E-03  -.1171614E-02
  -.1389442E-02  -.1624406E-02  -.1841224E-02  -.1959481E-02  -.1970471E-02
  -.1921581E-02  -.1836877E-02  -.1730247E-02  -.1629885E-02  -.1521853E-02
  -.1404797E-02  -.1249536E-02  -.9857785E-03  -.6195615E-03  -.2295354E-03
   .5253727E-04   .1424401E-03   .6798661E-04  -.7935084E-04  -.2120441E-03
  -.2603912E-03  -.1908520E-03  -.1068085E-04   .2223883E-03   .3975225E-03
   .4528837E-03   .3846589E-03   .2394380E-03   .9214887E-04   .1453142E-04
   .4154134E-04   .1075920E-03   .9376637E-04  -.2219866E-04  -.1885907E-03
  -.3628200E-03  -.5118117E-03  -.5863597E-03  -.5397158E-03  -.4202847E-03
  -.3488702E-03  -.3824039E-03  -.4679504E-03  -.5087396E-03  -.4554836E-03
  -.2944995E-03  -.1396258E-04   .3532087E-03   .6876776E-03   .9031558E-03
   .9547097E-03   .8597316E-03   .7591791E-03   .7473399E-03   .7649019E-03
   .7069362E-03   .5704770E-03   .4090307E-03   .2646568E-03   .1576484E-03
   .7231441E-04  -.3583026E-05  -.5718015E-04  -.8522639E-04  -.8457299E-04
  -.5757133E-04   .4558295E-05   .9496200E-04   .1312134E-03   .4488178E-04
  -.9780399E-04  -.1463534E-03  -.3463867E-04   .1639023E-03   .3423142E-03
   .4336977E-03   .4699994E-03   .4760863E-03   .4584894E-03   .4562908E-03
   .4929060E-03   .5442957E-03   .5851690E-03   .5997831E-03   .5650917E-03
   .5079606E-03   .4855237E-03   .4860397E-03   .4398157E-03   .2957264E-03
   .2885382E-04  -.3363638E-03  -.6792545E-03  -.8707865E-03  -.8721612E-03
  -.7222080E-03  -.5199139E-03  -.3675819E-03  -.3437857E-03  -.4686653E-03
  -.6853333E-03  -.8645890E-03  -.8747186E-03  -.7014254E-03  -.4194350E-03
  -.1119474E-03   .1486133E-03   .3260382E-03   .4377774E-03   .5165205E-03
   .5771123E-03   .6205891E-03   .6658191E-03   .7170275E-03   .7512122E-03
   .7209397E-03   .6381118E-03   .5715542E-03   .6103963E-03   .8012136E-03
   .1055227E-02   .1210765E-02   .1222009E-02   .1134217E-02   .9836969E-03
   .8533957E-03   .8329052E-03   .9138187E-03   .1047716E-02   .1179073E-02
   .1288668E-02   .1324882E-02   .1256852E-02   .1119169E-02   .9343904E-03
   .7077474E-03   .4665087E-03   .2646274E-03   .1031801E-03   .1238467E-04
   .2315219E-04   .1200619E-03   .2342683E-03   .3177740E-03   .3680626E-03
   .4229643E-03   .5039887E-03   .5458936E-03   .4970070E-03   .3818166E-03
   .2698730E-03   .2053071E-03   .1349481E-03  -.1138418E-04  -.1900933E-03
  -.3111336E-03  -.3292947E-03  -.2315238E-03  -.7895077E-04   .3251700E-04
   .4495322E-04  -.4680490E-04  -.2302884E-03  -.4804068E-03  -.7169632E-03
  -.8469792E-03  -.8050997E-03  -.5868915E-03  -.2607091E-03   .9627314E-04
   .4249408E-03   .6639624E-03   .7789787E-03   .7724714E-03   .6497353E-03
   .3971784E-03   .2148751E-04  -.4258205E-03  -.8943869E-03  -.1336492E-02
  -.1682291E-02  -.1914187E-02  -.2054180E-02  -.2074602E-02  -.1946604E-02
  -.1719907E-02  -.1429411E-02  -.1092006E-02  -.7390042E-03  -.4239326E-03
  -.2130082E-03  -.1604140E-03  -.2801503E-03  -.5071677E-03  -.7435064E-03
  -.8955156E-03  -.9418997E-03  -.9122942E-03  -.8332579E-03  -.7306818E-03
  -.6143205E-03  -.5228686E-03  -.5001649E-03  -.5239476E-03  -.5676388E-03
  -.6105537E-03  -.6208857E-03  -.5510838E-03  -.3943219E-03  -.1899089E-03
   .8924553E-04   .4579751E-03   .8349055E-03   .1094794E-02   .1162303E-02
   .1060813E-02   .8643158E-03   .6628680E-03   .5140009E-03   .4312765E-03
   .4096781E-03   .3798303E-03   .2387548E-03  -.3590653E-04  -.4083166E-03
  -.7699512E-03  -.9852174E-03  -.1042765E-02  -.1001457E-02  -.9268128E-03
  -.8999142E-03  -.9711212E-03  -.1082034E-02  -.1130726E-02  -.1047628E-02
  -.8351593E-03  -.6061262E-03  -.4525383E-03  -.3699321E-03  -.3330827E-03
  -.3098201E-03  -.3058161E-03  -.3054785E-03  -.2395787E-03  -.7941248E-04
   .1239215E-03   .2861019E-03   .3883067E-03   .4685721E-03   .5396946E-03
   .6130986E-03   .6984531E-03   .7580052E-03   .7771790E-03   .7707822E-03
   .7187009E-03   .5673764E-03   .2905714E-03  -.6027010E-04  -.3905588E-03
  -.6113605E-03  -.7100503E-03  -.7187863E-03  -.6559266E-03  -.5046045E-03
  -.3068172E-03  -.1720575E-03  -.1458911E-03  -.1889751E-03  -.2811489E-03
  -.4260300E-03  -.5929252E-03  -.7295468E-03  -.7809681E-03  -.7248305E-03
  -.5579895E-03  -.3538725E-03  -.2328802E-03  -.2025045E-03  -.1916835E-03
  -.1294780E-03   .2106241E-04   .2152171E-03   .3673616E-03   .3965477E-03
   .3068770E-03   .2207386E-03   .2425394E-03   .3318773E-03   .3980561E-03
   .4335178E-03   .4734139E-03   .5547450E-03   .6698072E-03   .7804339E-03
   .8445637E-03   .8273568E-03   .7268846E-03   .6057664E-03   .5125189E-03
   .4362007E-03   .3405934E-03   .2413369E-03   .1753504E-03   .1555383E-03
   .1669983E-03   .1381245E-03   .1324718E-04  -.2208945E-03  -.4992181E-03
  -.7356720E-03  -.9137133E-03  -.1064778E-02  -.1190906E-02  -.1279079E-02
  -.1356681E-02  -.1480893E-02  -.1704380E-02  -.2036402E-02  -.2383901E-02
  -.2603923E-02  -.2627720E-02  -.2480164E-02  -.2196670E-02  -.1802188E-02
  -.1393765E-02  -.1119480E-02  -.1025485E-02  -.1032712E-02  -.1032986E-02
  -.9811835E-03  -.8896039E-03  -.7464557E-03  -.5346591E-03  -.2733701E-03
   .5057753E-05   .2576590E-03   .4611998E-03   .6318673E-03   .8109410E-03
   .1051034E-02   .1346281E-02   .1652532E-02   .1949645E-02   .2235196E-02
   .2483765E-02   .2657369E-02   .2757342E-02   .2836480E-02   .2919259E-02
   .3018216E-02   .3133200E-02   .3206277E-02   .3158598E-02   .2983619E-02
   .2760148E-02   .2560260E-02   .2370096E-02   .2177051E-02   .2002500E-02
   .1819159E-02   .1560079E-02   .1202829E-02   .7868947E-03   .3651765E-03
  -.5981043E-04  -.5205253E-03  -.1026184E-02  -.1524375E-02  -.1925267E-02
  -.2166370E-02  -.2261995E-02  -.2290632E-02  -.2334279E-02  -.2455339E-02
  -.2660741E-02  -.2915326E-02  -.3090243E-02  -.3054267E-02  -.2809380E-02
  -.2484037E-02  -.2228988E-02  -.2151469E-02  -.2249013E-02  -.2424450E-02
  -.2534732E-02  -.2439842E-02  -.2116036E-02  -.1675696E-02  -.1211931E-02
  -.8001891E-03  -.4397433E-03  -.7953415E-04   .3319474E-03   .7814887E-03
   .1215705E-02   .1609075E-02   .1948297E-02   .2168339E-02   .2249094E-02
   .2270620E-02   .2273951E-02   .2230464E-02   .2142703E-02   .2057475E-02
   .1968855E-02   .1859974E-02   .1788575E-02   .1829202E-02   .1996733E-02
   .2211425E-02   .2330544E-02   .2271851E-02   .2029550E-02   .1595355E-02
   .9971102E-03   .3809317E-03  -.5357655E-04  -.2074175E-03  -.8901139E-04
   .2088652E-03   .5468493E-03   .8020602E-03   .9327874E-03   .9593093E-03
   .9569036E-03   .1024123E-02   .1183542E-02   .1384033E-02   .1608299E-02
   .1825536E-02   .1950799E-02   .1887368E-02   .1652388E-02   .1345485E-02
   .1034126E-02   .7403904E-03   .4875017E-03   .3116940E-03   .2193555E-03
   .1301323E-03  -.2888665E-04  -.2351638E-03  -.4312525E-03  -.6276490E-03
  -.8604552E-03  -.1109406E-02  -.1306135E-02  -.1434620E-02  -.1516004E-02
  -.1535000E-02  -.1479344E-02  -.1429911E-02  -.1520741E-02  -.1779746E-02
  -.2146539E-02  -.2535553E-02  -.2867440E-02  -.3110501E-02  -.3257935E-02
  -.3330398E-02  -.3392063E-02  -.3501953E-02  -.3645091E-02  -.3733629E-02
  -.3667997E-02  -.3390688E-02  -.2932319E-02  -.2376480E-02  -.1788018E-02
  -.1204457E-02  -.6456657E-03  -.1178902E-03   .3912578E-03   .8663801E-03
   .1242970E-02   .1481165E-02   .1588578E-02   .1602429E-02   .1594415E-02
   .1581947E-02   .1561923E-02   .1573272E-02   .1610064E-02   .1603065E-02
   .1517165E-02   .1339308E-02   .1054153E-02   .7299960E-03   .4640138E-03
   .3390318E-03   .4029593E-03   .5971797E-03   .8149260E-03   .9589773E-03
   .1011185E-02   .1031909E-02   .1073078E-02   .1139545E-02   .1195817E-02
   .1149597E-02   .8794215E-03   .3423233E-03  -.3766081E-03  -.1115159E-02
  -.1707847E-02  -.2061638E-02  -.2203112E-02  -.2215186E-02  -.2198202E-02
  -.2224163E-02  -.2307073E-02  -.2390452E-02  -.2344280E-02  -.2081791E-02
  -.1676241E-02  -.1244945E-02  -.8365850E-03  -.4794023E-03  -.2192476E-03
  -.5661344E-04   .3913469E-04   .8615628E-04   .1252256E-03   .2196617E-03
   .3518317E-03   .4877305E-03   .6223935E-03   .7091270E-03   .7155647E-03
   .6558238E-03   .5344380E-03   .3547992E-03   .1671975E-03   .7450115E-05
  -.9099365E-04  -.1416760E-03  -.1878766E-03  -.2278036E-03  -.2121407E-03
  -.6550129E-04   .2461552E-03   .6975746E-03   .1200085E-02   .1657288E-02
   .2001140E-02   .2197080E-02   .2237494E-02   .2148879E-02   .1971202E-02
   .1704125E-02   .1339619E-02   .9239295E-03   .5250399E-03   .1827875E-03
  -.9010100E-04  -.2898348E-03  -.4372575E-03  -.5515700E-03  -.6505181E-03
  -.7631643E-03  -.9199257E-03  -.1101205E-02  -.1246988E-02  -.1308798E-02
  -.1322320E-02  -.1334973E-02  -.1339139E-02  -.1341395E-02  -.1365009E-02
  -.1403416E-02  -.1447856E-02  -.1509874E-02  -.1566656E-02  -.1577589E-02
  -.1564342E-02  -.1581066E-02  -.1635998E-02  -.1697671E-02  -.1772111E-02
  -.1860719E-02  -.1923340E-02  -.1925884E-02  -.1826333E-02  -.1570912E-02
  -.1185382E-02  -.7551576E-03  -.3111819E-03   .1272334E-03   .5228209E-03
   .8420602E-03   .1085569E-02   .1238997E-02   .1221357E-02   .1040949E-02
   .8161195E-03   .6686091E-03   .6770099E-03   .8581832E-03   .1134383E-02
   .1375446E-02   .1514116E-02   .1558673E-02   .1548631E-02   .1517719E-02
   .1502747E-02   .1513908E-02   .1532994E-02   .1551371E-02   .1541358E-02
   .1464352E-02   .1359222E-02   .1310209E-02   .1374497E-02   .1516761E-02
   .1626834E-02   .1613126E-02   .1413970E-02   .1025641E-02   .5427916E-03
   .9598985E-04  -.2272898E-03  -.3951059E-03  -.4447880E-03  -.5013911E-03
  -.7175283E-03  -.1168560E-02  -.1746424E-02  -.2271463E-02  -.2597495E-02
  -.2671407E-02  -.2548425E-02  -.2293679E-02  -.1964364E-02  -.1605324E-02
  -.1235154E-02  -.8341191E-03  -.3549167E-03   .1798494E-03   .6533797E-03
   .9178469E-03   .8782414E-03   .5638600E-03   .1262628E-03  -.2489493E-03
  -.4036582E-03  -.3262340E-03  -.1701595E-03  -.1046116E-03  -.1812542E-03
  -.3309463E-03  -.4477636E-03  -.4353323E-03  -.2320220E-03   .1706073E-03
   .7665540E-03   .1435406E-02   .1983866E-02   .2264192E-02   .2233126E-02
   .1947899E-02   .1520440E-02   .1096369E-02   .7321434E-03   .4089004E-03
   .1214242E-03  -.1075964E-03  -.2462058E-03  -.2976138E-03  -.3244530E-03
  -.3620880E-03  -.3954780E-03  -.4339149E-03  -.5516683E-03  -.8395295E-03
  -.1319811E-02  -.1894237E-02  -.2425023E-02  -.2812048E-02  -.3032857E-02
  -.3104208E-02  -.3030262E-02  -.2819214E-02  -.2487190E-02  -.2079223E-02
  -.1630761E-02  -.1164854E-02  -.7357487E-03  -.3722840E-03  -.5893396E-04
   .2021197E-03   .3280029E-03   .2182016E-03  -.1409920E-03  -.6866861E-03
  -.1283844E-02  -.1790818E-02  -.2104479E-02  -.2139377E-02  -.1857401E-02
  -.1343248E-02  -.7819909E-03  -.3050712E-03   .6385588E-04   .3120204E-03
   .4227065E-03   .4377116E-03   .4090405E-03   .3679326E-03   .3348128E-03
   .2755840E-03   .1925179E-03   .1023351E-03   .3174691E-04   .3361970E-04
   .1593489E-03   .4169563E-03   .7599606E-03   .1104537E-02   .1361257E-02
   .1524686E-02   .1658831E-02   .1796979E-02   .1902816E-02   .1907486E-02
   .1800203E-02   .1635525E-02   .1447061E-02   .1250260E-02   .1080736E-02
   .9936280E-03   .1024023E-02   .1145457E-02   .1278404E-02   .1318111E-02
   .1227768E-02   .1072213E-02   .9420395E-03   .8731718E-03   .8588441E-03
   .9000880E-03   .9766947E-03   .1029549E-02   .9949102E-03   .8493598E-03
   .6042788E-03   .3087277E-03   .5490375E-04  -.1008980E-03  -.1835311E-03
  -.2777693E-03  -.4604273E-03  -.7506477E-03  -.1093685E-02  -.1392223E-02
  -.1543740E-02  -.1491189E-02  -.1284958E-02  -.1067808E-02  -.9420563E-03
  -.9469436E-03  -.1055972E-02  -.1150583E-02  -.1189015E-02  -.1236772E-02
  -.1337019E-02  -.1447145E-02  -.1477746E-02  -.1336142E-02  -.9359200E-03
  -.2990363E-03   .4244947E-03   .1059771E-02   .1509809E-02   .1755561E-02
   .1840491E-02   .1893282E-02   .2039198E-02   .2304385E-02   .2625984E-02
   .2915715E-02   .3122895E-02   .3269182E-02   .3345340E-02   .3294464E-02
   .3075362E-02   .2720412E-02   .2269416E-02   .1740687E-02   .1150643E-02
   .5177974E-03  -.9420524E-04  -.5792003E-03  -.8865107E-03  -.1049211E-02
  -.1130331E-02  -.1173246E-02  -.1151874E-02  -.1018632E-02  -.7787329E-03
  -.4159524E-03   .7308385E-04   .6086623E-03   .1123777E-02   .1580515E-02
   .1926243E-02   .2141993E-02   .2187232E-02   .1991076E-02   .1563846E-02
   .9631150E-03   .2733948E-03  -.4120129E-03  -.1054457E-02  -.1658390E-02
  -.2244250E-02  -.2770734E-02  -.3176195E-02  -.3398415E-02  -.3341248E-02
  -.2973369E-02  -.2320698E-02  -.1467094E-02  -.5985529E-03   .8194399E-04
   .4831513E-03   .5813132E-03   .4660001E-03   .2558129E-03   .2412089E-04
  -.1984839E-03  -.4167073E-03  -.6708909E-03  -.9794410E-03  -.1295321E-02
  -.1500397E-02  -.1467476E-02  -.1229697E-02  -.9352106E-03  -.7050574E-03
  -.6051899E-03  -.6696576E-03  -.8810709E-03  -.1111250E-02  -.1181754E-02
  -.1047475E-02  -.7999055E-03  -.6007564E-03  -.5477847E-03  -.6361332E-03
  -.8402550E-03  -.1130336E-02  -.1466017E-02  -.1778880E-02  -.1997016E-02
  -.2077012E-02  -.1955016E-02  -.1603340E-02  -.1071894E-02  -.4713917E-03
   .8757874E-04   .5528920E-03   .9184804E-03   .1184033E-02   .1303929E-02
   .1260993E-02   .1109652E-02   .8457411E-03   .4423272E-03  -.8188607E-04
  -.6508003E-03  -.1190680E-02  -.1636514E-02  -.1887962E-02  -.1869378E-02
  -.1638564E-02  -.1312020E-02  -.9839716E-03  -.7456981E-03  -.6572461E-03
  -.6556641E-03  -.5764752E-03  -.2979299E-03   .1556493E-03   .6371508E-03
   .1028358E-02   .1328948E-02   .1562760E-02   .1773550E-02   .2046782E-02
   .2424335E-02   .2900084E-02   .3381068E-02   .3719715E-02   .3801196E-02
   .3564406E-02   .3070218E-02   .2513384E-02   .2097205E-02   .1903226E-02
   .1859214E-02   .1841351E-02   .1775626E-02   .1630126E-02   .1420731E-02
   .1180304E-02   .9106644E-03   .5899571E-03   .1977142E-03  -.2780186E-03
  -.8130628E-03  -.1319352E-02  -.1677004E-02  -.1843411E-02  -.1923943E-02
  -.2057858E-02  -.2269503E-02  -.2482822E-02  -.2594299E-02  -.2528427E-02
  -.2268706E-02  -.1867046E-02  -.1410162E-02  -.9829503E-03  -.6919387E-03
  -.5818269E-03  -.6161756E-03  -.7500952E-03  -.8995726E-03  -.9613900E-03
  -.9132550E-03  -.8090727E-03  -.6904841E-03  -.6025734E-03  -.5939128E-03
  -.6780936E-03  -.8260597E-03  -.9685190E-03  -.1053186E-02  -.1076534E-02
  -.1067151E-02  -.1062038E-02  -.1107563E-02  -.1221894E-02  -.1342477E-02
  -.1412060E-02  -.1459001E-02  -.1596357E-02  -.1926541E-02  -.2428143E-02
  -.2977135E-02  -.3494876E-02  -.3923639E-02  -.4182022E-02  -.4205684E-02
  -.3972910E-02  -.3539325E-02  -.3081739E-02  -.2782795E-02  -.2702771E-02
  -.2705827E-02  -.2611986E-02  -.2357698E-02  -.1982523E-02  -.1590317E-02
  -.1279092E-02  -.1104725E-02  -.1054097E-02  -.1051764E-02  -.1038133E-02
  -.9896817E-03  -.8793944E-03  -.6851858E-03  -.4160850E-03  -.1337433E-03
   .5967479E-04   .1159640E-03   .1337303E-03   .2545624E-03   .5602878E-03
   .1017322E-02   .1527999E-02   .1975716E-02   .2279741E-02   .2398828E-02
   .2312357E-02   .2075093E-02   .1806107E-02   .1601143E-02   .1526294E-02
   .1599370E-02   .1745111E-02   .1867542E-02   .1915044E-02   .1921407E-02
   .1927801E-02   .1962792E-02   .2029979E-02   .2111752E-02   .2202475E-02
   .2242717E-02   .2172896E-02   .2000260E-02   .1776339E-02   .1557302E-02
   .1318143E-02   .1011703E-02   .6771465E-03   .3910776E-03   .1961650E-03
   .7798228E-04  -.1069481E-04  -.1378607E-03  -.3267484E-03  -.5284026E-03
  -.6436604E-03  -.5681757E-03  -.2696269E-03   .1880826E-03   .7460795E-03
   .1351436E-02   .1923070E-02   .2440001E-02   .2888718E-02   .3212635E-02
   .3372445E-02   .3349507E-02   .3179839E-02   .2956459E-02   .2770196E-02
   .2651788E-02   .2547827E-02   .2386195E-02   .2123823E-02   .1784162E-02
   .1404252E-02   .9416103E-03   .3246179E-03  -.4531532E-03  -.1280927E-02
  -.1936987E-02  -.2253597E-02  -.2255171E-02  -.2037903E-02  -.1697947E-02
  -.1357015E-02  -.1117616E-02  -.9838392E-03  -.8643917E-03  -.6686670E-03
  -.4146814E-03  -.1754404E-03   .2940737E-04   .2374283E-03   .5312666E-03
   .9210785E-03   .1312388E-02   .1628386E-02   .1901150E-02   .2190470E-02
   .2515105E-02   .2883148E-02   .3241487E-02   .3497303E-02   .3576268E-02
   .3468708E-02   .3225042E-02   .2883120E-02   .2465628E-02   .1992523E-02
   .1481465E-02   .9843333E-03   .5742826E-03   .2778714E-03   .4729981E-04
  -.1988587E-03  -.5161030E-03  -.9047447E-03  -.1318969E-02  -.1719792E-02
  -.2091666E-02  -.2481028E-02  -.2973471E-02  -.3610049E-02  -.4338389E-02
  -.5040545E-02  -.5598515E-02  -.5917271E-02  -.6004695E-02  -.5904163E-02
  -.5651467E-02  -.5272954E-02  -.4721231E-02  -.3978517E-02  -.3128728E-02
  -.2271148E-02  -.1466154E-02  -.7348146E-03  -.9956945E-04   .4724393E-03
   .1081330E-02   .1776672E-02   .2508808E-02   .3181212E-02   .3648249E-02
   .3814485E-02   .3737575E-02   .3584048E-02   .3504564E-02   .3570521E-02
   .3756712E-02   .3935375E-02   .3953224E-02   .3719454E-02   .3301216E-02
   .2887392E-02   .2587692E-02   .2426921E-02   .2321699E-02   .2143274E-02
   .1815884E-02   .1341333E-02   .7987432E-03   .2964803E-03  -.3330673E-04
  -.1487202E-03  -.1348012E-03  -.1044581E-03  -.1288524E-03  -.2470879E-03
  -.4975200E-03  -.8830800E-03  -.1306179E-02  -.1636887E-02  -.1810203E-02
  -.1858607E-02  -.1871030E-02  -.1940300E-02  -.2062283E-02  -.2168993E-02
  -.2134250E-02  -.1864132E-02  -.1379293E-02  -.8277662E-03  -.3764855E-03
  -.7472941E-04   .9537133E-04   .1672882E-03   .1790812E-03   .2159818E-03
   .3384746E-03   .4869510E-03   .5584524E-03   .5469592E-03   .5211339E-03
   .5790893E-03   .7767424E-03   .1153693E-02   .1689826E-02   .2267212E-02
   .2716613E-02   .2903939E-02   .2765677E-02   .2367069E-02   .1829815E-02
   .1235495E-02   .5772121E-03  -.1736823E-03  -.9682246E-03  -.1661688E-02
  -.2131281E-02  -.2388432E-02  -.2509810E-02  -.2565520E-02  -.2574384E-02
  -.2482045E-02  -.2244463E-02  -.1885125E-02  -.1452466E-02  -.1026921E-02
  -.7292515E-03  -.6417124E-03  -.7361154E-03  -.9117865E-03  -.1057930E-02
  -.1104222E-02  -.1031418E-02  -.8995395E-03  -.7865207E-03  -.7147108E-03
  -.7067817E-03  -.7576538E-03  -.8111270E-03  -.8634414E-03  -.9119040E-03
  -.9007038E-03  -.8119203E-03  -.7509863E-03  -.9089790E-03  -.1408906E-02
  -.2205606E-02  -.3136796E-02  -.3975206E-02  -.4529645E-02  -.4706033E-02
  -.4522651E-02  -.4127524E-02  -.3712266E-02  -.3362123E-02  -.3004773E-02
  -.2528034E-02  -.1866793E-02  -.1025254E-02  -.7788274E-04   .8466303E-03
   .1650626E-02   .2307496E-02   .2795808E-02   .3082532E-02   .3163644E-02
   .3029464E-02   .2701953E-02   .2195090E-02   .1503068E-02   .6539050E-03
  -.2693642E-03  -.1115034E-02  -.1686310E-02  -.1878473E-02  -.1727124E-02
  -.1316536E-02  -.7754574E-03  -.1926080E-03   .4011736E-03   .1006606E-02
   .1617063E-02   .2220594E-02   .2776808E-02   .3239234E-02   .3528649E-02
   .3576096E-02   .3359640E-02   .2892965E-02   .2253299E-02   .1565774E-02
   .9328394E-03   .4255266E-03   .5053996E-04  -.2630631E-03  -.5357245E-03
  -.7565840E-03  -.9206057E-03  -.1025036E-02  -.1078429E-02  -.1092707E-02
  -.1144510E-02  -.1329036E-02  -.1615972E-02  -.1901381E-02  -.2068342E-02
  -.2059110E-02  -.1932860E-02  -.1783525E-02  -.1698494E-02  -.1697833E-02
  -.1721227E-02  -.1689204E-02  -.1560959E-02  -.1292859E-02  -.8548789E-03
  -.2949370E-03   .2796250E-03   .7611310E-03   .1159212E-02   .1559987E-02
   .2036976E-02   .2624937E-02   .3309385E-02   .3986532E-02   .4410674E-02
   .4374508E-02   .3863032E-02   .3045709E-02   .2183406E-02   .1510025E-02
   .1167840E-02   .1123928E-02   .1166466E-02   .1093500E-02   .8412092E-03
   .4451254E-03   .5216187E-05  -.3651002E-03  -.5770796E-03  -.6015919E-03
  -.4862079E-03  -.3686117E-03  -.4057893E-03  -.6279616E-03  -.9379448E-03
  -.1168843E-02  -.1128762E-02  -.7253443E-03  -.4335465E-05   .8420190E-03
   .1583409E-02   .2115715E-02   .2441788E-02   .2619944E-02   .2691123E-02
   .2649634E-02   .2477521E-02   .2183145E-02   .1822176E-02   .1434677E-02
   .1028465E-02   .6220858E-03   .2370724E-03  -.1268267E-03  -.4806798E-03
  -.8273209E-03  -.1174396E-02  -.1486493E-02  -.1743488E-02  -.1993513E-02
  -.2255001E-02  -.2529691E-02  -.2861110E-02  -.3305456E-02  -.3845314E-02
  -.4324536E-02  -.4580275E-02  -.4547875E-02  -.4250271E-02  -.3782878E-02
  -.3283296E-02  -.2867911E-02  -.2576555E-02  -.2394130E-02  -.2297000E-02
  -.2281862E-02  -.2355751E-02  -.2528424E-02  -.2810330E-02  -.3188314E-02
  -.3628565E-02  -.4123500E-02  -.4641965E-02  -.5111115E-02  -.5508160E-02
  -.5860435E-02  -.6185827E-02  -.6480383E-02  -.6714602E-02  -.6838001E-02
  -.6788994E-02  -.6532403E-02  -.6094703E-02  -.5548035E-02  -.4975299E-02
  -.4457050E-02  -.4050130E-02  -.3761566E-02  -.3569857E-02  -.3436271E-02
  -.3319927E-02  -.3171749E-02  -.2884921E-02  -.2420815E-02  -.1876048E-02
  -.1418608E-02  -.1234126E-02  -.1371755E-02  -.1768640E-02  -.2312336E-02
  -.2811234E-02  -.3070849E-02  -.2974396E-02  -.2502704E-02  -.1795180E-02
  -.1091749E-02  -.5802044E-03  -.3376392E-03  -.3178813E-03  -.4012686E-03
  -.4989282E-03  -.4712286E-03  -.2396227E-03   .1059967E-03   .4459277E-03
   .7025173E-03   .9007711E-03   .1138339E-02   .1469249E-02   .1918858E-02
   .2470051E-02   .3070945E-02   .3665779E-02   .4173928E-02   .4533085E-02
   .4717332E-02   .4754242E-02   .4710299E-02   .4608967E-02   .4453455E-02
   .4295305E-02   .4187361E-02   .4126080E-02   .4071190E-02   .3976339E-02
   .3808144E-02   .3587069E-02   .3372112E-02   .3231121E-02   .3221919E-02
   .3357247E-02   .3621227E-02   .3967782E-02   .4325519E-02   .4667198E-02
   .5016132E-02   .5379624E-02   .5751566E-02   .6052657E-02   .6174414E-02
   .6095826E-02   .5914294E-02   .5711104E-02   .5485929E-02   .5227458E-02
   .5007239E-02   .4918763E-02   .4950246E-02   .5037424E-02   .5136053E-02
   .5222827E-02   .5304060E-02   .5387613E-02   .5430041E-02   .5387232E-02
   .5241456E-02   .4971034E-02   .4553588E-02   .3983151E-02   .3311984E-02
   .2650962E-02   .2101070E-02   .1732659E-02   .1557656E-02   .1555574E-02
   .1682785E-02   .1845635E-02   .1916314E-02   .1813620E-02   .1581100E-02
   .1333152E-02   .1197730E-02   .1211574E-02   .1286448E-02   .1321937E-02
   .1294268E-02   .1256387E-02   .1238810E-02   .1221053E-02   .1137312E-02
   .8860719E-03   .3200763E-03  -.7081828E-03  -.2202159E-02  -.3993510E-02
  -.5902828E-02  -.7767827E-02  -.9417114E-02  -.1074384E-01  -.1169749E-01
  -.1231538E-01  -.1272578E-01  -.1309578E-01  -.1349654E-01  -.1389498E-01
  -.1420414E-01  -.1431946E-01  -.1423190E-01  -.1404878E-01  -.1387644E-01
  -.1379567E-01  -.1383985E-01  -.1404181E-01  -.1442295E-01  -.1497455E-01
  -.1567620E-01  -.1646651E-01  -.1727515E-01  -.1806342E-01  -.1881461E-01
  -.1944273E-01  -.1985737E-01  -.2002505E-01  -.1996386E-01  -.1973094E-01
  -.1939705E-01  -.1898262E-01  -.1839272E-01  -.1754560E-01  -.1640130E-01
  -.1494208E-01  -.1319888E-01  -.1128206E-01  -.9295354E-02  -.7272779E-02
  -.5197740E-02  -.3071796E-02  -.9531317E-03   .1088940E-02   .2931235E-02
   .4492088E-02   .5778798E-02   .6852888E-02   .7822387E-02   .8787263E-02
   .9815153E-02   .1091067E-01   .1202307E-01   .1306380E-01   .1397473E-01
   .1472934E-01   .1530926E-01   .1574336E-01   .1610471E-01   .1644227E-01
   .1671827E-01   .1683935E-01   .1677371E-01   .1653405E-01   .1622110E-01
   .1594828E-01   .1572151E-01   .1550191E-01   .1525996E-01   .1493208E-01
   .1443931E-01   .1378136E-01   .1304083E-01   .1227416E-01   .1143975E-01
   .1049494E-01   .9431294E-02   .8283296E-02   .7094507E-02   .5939408E-02
   .4963610E-02   .4256823E-02   .3855287E-02   .3859556E-02   .4318159E-02
   .5074611E-02   .5848594E-02   .6403941E-02   .6692979E-02   .6867531E-02
   .7205908E-02   .7886661E-02   .8887826E-02   .1003160E-01   .1103197E-01
   .1162089E-01   .1165012E-01   .1120693E-01   .1060470E-01   .1019164E-01
   .1015343E-01   .1043478E-01   .1083159E-01   .1111413E-01   .1107868E-01
   .1063028E-01   .9716400E-02   .8352170E-02   .6710790E-02   .5055530E-02
   .3673472E-02   .2703828E-02   .2030195E-02   .1394095E-02   .5485425E-03
  -.6216025E-03  -.2068828E-02  -.3594255E-02  -.4962292E-02  -.6052994E-02
  -.6860491E-02  -.7458910E-02  -.8041746E-02  -.8838746E-02  -.9974484E-02
  -.1136673E-01  -.1272705E-01  -.1370668E-01  -.1407723E-01  -.1381515E-01
  -.1308589E-01  -.1217984E-01  -.1140039E-01  -.1095613E-01  -.1084975E-01
  -.1087027E-01  -.1080315E-01  -.1056296E-01  -.1018655E-01  -.9824425E-02
  -.9685198E-02  -.9993306E-02  -.1084120E-01  -.1207226E-01  -.1332055E-01
  -.1419375E-01  -.1449376E-01  -.1428092E-01  -.1377987E-01  -.1324425E-01
  -.1288568E-01  -.1282750E-01  -.1307324E-01  -.1349806E-01  -.1384867E-01
  -.1381970E-01  -.1323658E-01  -.1212236E-01  -.1064744E-01  -.9027020E-02
  -.7462579E-02  -.6149312E-02  -.5176984E-02  -.4475028E-02  -.3834519E-02
  -.2937399E-02  -.1603098E-02   .3401475E-04   .1649895E-02   .2894523E-02
   .3537781E-02   .3639068E-02   .3525415E-02   .3543678E-02   .3915277E-02
   .4688510E-02   .5656188E-02   .6413916E-02   .6651262E-02   .6295115E-02
   .5470294E-02   .4418625E-02   .3398134E-02   .2557549E-02   .1827603E-02
   .9657972E-03  -.2537911E-03  -.1821480E-02  -.3512331E-02  -.4951601E-02
  -.5748397E-02  -.5711991E-02  -.4974664E-02  -.3884232E-02  -.2817428E-02
  -.2023899E-02  -.1519026E-02  -.1048184E-02  -.2311800E-03   .1170257E-02
   .3170157E-02   .5529534E-02   .7812913E-02   .9625308E-02   .1084237E-01
   .1164708E-01   .1232025E-01   .1308535E-01   .1397406E-01   .1484984E-01
   .1552723E-01   .1592108E-01   .1602306E-01   .1586426E-01   .1557798E-01
   .1529571E-01   .1504550E-01   .1474699E-01   .1431143E-01   .1366235E-01
   .1279801E-01   .1184366E-01   .1095372E-01   .1019273E-01   .9559633E-02
   .9014042E-02   .8519571E-02   .8045849E-02   .7507274E-02   .6818511E-02
   .5982917E-02   .5086862E-02   .4203666E-02   .3269178E-02   .2131812E-02
   .7129163E-03  -.9279862E-03  -.2684047E-02  -.4439974E-02  -.6055539E-02
  -.7362509E-02  -.8193001E-02  -.8546199E-02  -.8552257E-02  -.8401277E-02
  -.8253943E-02  -.8153537E-02  -.8087734E-02  -.8016372E-02  -.7864378E-02
  -.7625686E-02  -.7378278E-02  -.7226021E-02  -.7280679E-02  -.7582618E-02
  -.8064283E-02  -.8595601E-02  -.9056893E-02  -.9371505E-02  -.9538791E-02
  -.9594546E-02  -.9577680E-02  -.9508037E-02  -.9351363E-02  -.9066447E-02
  -.8669885E-02  -.8217737E-02  -.7822891E-02  -.7640343E-02  -.7790276E-02
  -.8326863E-02  -.9164495E-02  -.1009128E-01  -.1087873E-01  -.1134135E-01
  -.1140776E-01  -.1116986E-01  -.1083786E-01  -.1061493E-01  -.1067175E-01
  -.1110046E-01  -.1180482E-01  -.1254740E-01  -.1308142E-01  -.1329231E-01
  -.1324704E-01  -.1310366E-01  -.1299358E-01  -.1298140E-01  -.1299794E-01
  -.1294109E-01  -.1277701E-01  -.1252926E-01  -.1224146E-01  -.1193455E-01
  -.1160349E-01  -.1121483E-01  -.1073352E-01  -.1018233E-01  -.9619340E-02
  -.9139785E-02  -.8887391E-02  -.8910596E-02  -.9072325E-02  -.9197058E-02
  -.9140820E-02  -.8753775E-02  -.7936337E-02  -.6740340E-02  -.5341097E-02
  -.3942628E-02  -.2700376E-02  -.1671301E-02  -.7620006E-03   .2151407E-03
   .1419638E-02   .2828249E-02   .4248110E-02   .5494986E-02   .6492697E-02
   .7248219E-02   .7890121E-02   .8591229E-02   .9445061E-02   .1038405E-01
   .1123236E-01   .1176577E-01   .1183923E-01   .1148032E-01   .1083487E-01
   .1009659E-01   .9409277E-02   .8877565E-02   .8528509E-02   .8272038E-02
   .7987519E-02   .7599192E-02   .7123845E-02   .6616123E-02   .6096501E-02
   .5570264E-02   .5024172E-02   .4399778E-02   .3640246E-02   .2744624E-02
   .1723490E-02   .5712346E-03  -.6765837E-03  -.1936136E-02  -.3066948E-02
  -.3950399E-02  -.4550283E-02  -.4859737E-02  -.4884494E-02  -.4673934E-02
  -.4329467E-02  -.3923790E-02  -.3451939E-02  -.2892011E-02  -.2256512E-02
  -.1543213E-02  -.7187437E-03   .2492026E-03   .1385419E-02   .2682699E-02
   .4097116E-02   .5524311E-02   .6896316E-02   .8223453E-02   .9531703E-02
   .1078967E-01   .1187131E-01   .1259094E-01   .1281351E-01   .1259373E-01
   .1213234E-01   .1162259E-01   .1120353E-01   .1091954E-01   .1066607E-01
   .1026075E-01   .9641903E-02   .8825939E-02   .7841169E-02   .6764849E-02
   .5741477E-02   .4858710E-02   .4110989E-02   .3450230E-02   .2787664E-02
   .2033400E-02   .1169305E-02   .2844508E-03  -.4910245E-03  -.1033319E-02
  -.1245185E-02  -.1124047E-02  -.7680624E-03  -.2993140E-03   .2545892E-03
   .9625525E-03   .1897148E-02   .3052179E-02   .4278474E-02   .5305338E-02
   .5904479E-02   .6060996E-02   .5933530E-02   .5770734E-02   .5744632E-02
   .5865344E-02   .6033019E-02   .6160025E-02   .6264063E-02   .6387988E-02
   .6572608E-02   .6810782E-02   .7149800E-02   .7703864E-02   .8518722E-02
   .9570453E-02   .1076905E-01   .1191447E-01   .1274483E-01   .1305824E-01
   .1282999E-01   .1220484E-01   .1140292E-01   .1060007E-01   .9862113E-02
   .9141489E-02   .8328129E-02   .7372739E-02   .6249242E-02   .4957812E-02
   .3582123E-02   .2146655E-02   .5975659E-03  -.1095816E-02  -.2881160E-02
  -.4611273E-02  -.6169307E-02  -.7501274E-02  -.8603786E-02  -.9517545E-02
  -.1035159E-01  -.1118968E-01  -.1200629E-01  -.1269478E-01  -.1316455E-01
  -.1336855E-01  -.1323805E-01  -.1274567E-01  -.1195242E-01  -.1096557E-01
  -.9786606E-02  -.8317795E-02  -.6446528E-02  -.4085712E-02  -.1236244E-02
   .1972512E-02   .5323947E-02   .8577648E-02   .1155933E-01   .1410293E-01
   .1600103E-01   .1723303E-01   .1798006E-01   .1845332E-01   .1872773E-01
   .1871217E-01   .1833968E-01   .1765677E-01   .1670396E-01   .1539636E-01
   .1363247E-01   .1148280E-01   .9281076E-02   .7394836E-02   .5974292E-02
   .4902362E-02   .4015499E-02   .3299379E-02   .2844128E-02   .2690043E-02
   .2814631E-02   .3194623E-02   .3848384E-02   .4773006E-02   .5903758E-02
   .7143127E-02   .8359867E-02   .9412068E-02   .1024608E-01   .1089206E-01
   .1137444E-01   .1173077E-01   .1199687E-01   .1210311E-01   .1184595E-01
   .1097903E-01   .9429589E-02   .7351167E-02   .4960077E-02   .2432497E-02
  -.1525190E-03  -.2816249E-02  -.5635915E-02  -.8665823E-02  -.1189359E-01
  -.1521557E-01  -.1843716E-01  -.2137542E-01  -.2396579E-01  -.2623596E-01
  -.2827893E-01  -.3019149E-01  -.3202289E-01  -.3378979E-01  -.3542261E-01
  -.3678705E-01  -.3777285E-01  -.3829366E-01  -.3827197E-01  -.3769816E-01
  -.3669013E-01  -.3544245E-01  -.3416058E-01  -.3299147E-01  -.3198010E-01
  -.3108160E-01  -.3021492E-01  -.2934983E-01  -.2849755E-01  -.2770267E-01
  -.2701982E-01  -.2639079E-01  -.2571075E-01  -.2488512E-01  -.2382622E-01
  -.2247743E-01  -.2088957E-01  -.1923429E-01  -.1773007E-01  -.1655768E-01
  -.1570636E-01  -.1494765E-01  -.1401880E-01  -.1283780E-01  -.1146933E-01
  -.1005743E-01  -.8752617E-02  -.7633889E-02  -.6689254E-02  -.5819255E-02
  -.4846935E-02  -.3593101E-02  -.1967841E-02  -.3864396E-04   .2041781E-02
   .4100035E-02   .5988656E-02   .7688035E-02   .9335854E-02   .1114062E-01
   .1325175E-01   .1557221E-01   .1775948E-01   .1953584E-01   .2092426E-01
   .2217342E-01   .2345970E-01   .2478368E-01   .2613729E-01   .2754743E-01
   .2900274E-01   .3042140E-01   .3166155E-01   .3254805E-01   .3296717E-01
   .3292933E-01   .3257269E-01   .3202058E-01   .3134468E-01   .3052645E-01
   .2945045E-01   .2798652E-01   .2607528E-01   .2374810E-01   .2109116E-01
   .1815053E-01   .1495304E-01   .1166538E-01   .8568917E-02   .5872425E-02
   .3504054E-02   .1158615E-02  -.1490174E-02  -.4540533E-02  -.7892209E-02
  -.1145163E-01  -.1515110E-01  -.1892812E-01  -.2265898E-01  -.2614518E-01
  -.2925505E-01  -.3196388E-01  -.3432378E-01  -.3644254E-01  -.3835712E-01
  -.3994137E-01  -.4105977E-01  -.4163292E-01  -.4159491E-01  -.4100699E-01
  -.4007610E-01  -.3898896E-01  -.3780366E-01  -.3648272E-01  -.3503178E-01
  -.3349406E-01  -.3183971E-01  -.2997074E-01  -.2782942E-01  -.2546054E-01
  -.2304229E-01  -.2080220E-01  -.1890493E-01  -.1732946E-01  -.1589059E-01
  -.1440329E-01  -.1276087E-01  -.1094103E-01  -.9083607E-02  -.7462441E-02
  -.6252129E-02  -.5409379E-02  -.4712021E-02  -.3921193E-02  -.2894683E-02
  -.1577308E-02  -.2803403E-04   .1522011E-02   .2788747E-02   .3648502E-02
   .4124290E-02   .4323524E-02   .4398418E-02   .4455115E-02   .4503573E-02
   .4444038E-02   .4181371E-02   .3768306E-02   .3353110E-02   .3021140E-02
   .2779033E-02   .2673433E-02   .2819180E-02   .3347124E-02   .4377272E-02
   .5980601E-02   .8144001E-02   .1073555E-01   .1350977E-01   .1613061E-01
   .1835104E-01   .2026996E-01   .2228590E-01   .2477486E-01   .2783821E-01
   .3119204E-01   .3431282E-01   .3673529E-01   .3819831E-01   .3860236E-01
   .3799155E-01   .3655595E-01   .3457593E-01   .3230114E-01   .2988690E-01
   .2735527E-01   .2466306E-01   .2181214E-01   .1888478E-01   .1603898E-01
   .1351617E-01   .1164193E-01   .1065157E-01   .1047446E-01   .1073725E-01
   .1106938E-01   .1132842E-01   .1158825E-01   .1197675E-01   .1259406E-01
   .1346513E-01   .1451630E-01   .1562384E-01   .1663764E-01   .1747640E-01
   .1817081E-01   .1879009E-01   .1940050E-01   .2002583E-01   .2067180E-01
   .2128497E-01   .2173909E-01   .2187080E-01   .2155953E-01   .2082585E-01
   .1987145E-01   .1892227E-01   .1810383E-01   .1742510E-01   .1676242E-01
   .1591172E-01   .1471106E-01   .1318186E-01   .1153809E-01   .1003125E-01
   .8724839E-02   .7500153E-02   .6212907E-02   .4710777E-02   .2871989E-02
   .6234301E-03  -.2015690E-02  -.4926055E-02  -.7959742E-02  -.1099513E-01
  -.1391653E-01  -.1662102E-01  -.1907873E-01  -.2132423E-01  -.2336578E-01
  -.2518941E-01  -.2672062E-01  -.2780528E-01  -.2828417E-01  -.2805974E-01
  -.2706930E-01  -.2528057E-01  -.2278439E-01  -.1974510E-01  -.1630071E-01
  -.1257555E-01  -.8749500E-02  -.4992650E-02  -.1445157E-02   .1803946E-02
   .4680623E-02   .7103598E-02   .9067409E-02   .1059387E-01   .1165617E-01
   .1218993E-01   .1220046E-01   .1184663E-01   .1136815E-01   .1097916E-01
   .1076352E-01   .1067557E-01   .1062225E-01   .1047362E-01   .1011001E-01
   .9487881E-02   .8691154E-02   .7866040E-02   .7130645E-02   .6463945E-02
   .5719384E-02   .4731852E-02   .3421571E-02   .1799794E-02  -.4976419E-04
  -.1903652E-02  -.3541964E-02  -.4900134E-02  -.6005400E-02  -.6897758E-02
  -.7615409E-02  -.8176948E-02  -.8566362E-02  -.8727555E-02  -.8604612E-02
  -.8204636E-02  -.7609912E-02  -.6969340E-02  -.6377250E-02  -.5777684E-02
  -.4991781E-02  -.3795431E-02  -.2084970E-02   .1324837E-04   .2241510E-02
   .4323364E-02   .6035520E-02   .7348587E-02   .8407672E-02   .9384108E-02
   .1035600E-01   .1129623E-01   .1211330E-01   .1268663E-01   .1296059E-01
   .1298423E-01   .1277950E-01   .1235192E-01   .1176992E-01   .1118874E-01
   .1077944E-01   .1059798E-01   .1057692E-01   .1060800E-01   .1052403E-01
   .1016968E-01   .9519569E-02   .8656508E-02   .7718365E-02   .6898079E-02
   .6376030E-02   .6166517E-02   .6194422E-02   .6381122E-02   .6620206E-02
   .6876939E-02   .7199597E-02   .7620417E-02   .8084807E-02   .8435171E-02
   .8541758E-02   .8375611E-02   .8004267E-02   .7599633E-02   .7393473E-02
   .7530746E-02   .8049339E-02   .8914409E-02   .1005665E-01   .1141516E-01
   .1290719E-01   .1443492E-01   .1593253E-01   .1735790E-01   .1868106E-01
   .1985972E-01   .2072046E-01   .2100939E-01   .2053923E-01   .1935991E-01
   .1763223E-01   .1539523E-01   .1253473E-01   .9047330E-02   .5181837E-02
   .1214136E-02  -.2728351E-02  -.6682902E-02  -.1068058E-01  -.1455740E-01
  -.1803021E-01  -.2087222E-01  -.2306546E-01  -.2473301E-01  -.2595945E-01
  -.2679408E-01  -.2728691E-01  -.2749573E-01  -.2743131E-01  -.2700218E-01
  -.2600247E-01  -.2423181E-01  -.2161237E-01  -.1828175E-01  -.1459094E-01
  -.1099976E-01  -.7919043E-02  -.5585098E-02  -.3968507E-02  -.2834440E-02
  -.1869974E-02  -.8255042E-03   .3692476E-03   .1681870E-02   .2989703E-02
   .4123827E-02   .4963698E-02   .5529548E-02   .5981796E-02   .6500271E-02
   .7203725E-02   .8088397E-02   .9079881E-02   .1011933E-01   .1114089E-01
   .1197472E-01   .1238952E-01   .1229560E-01   .1176665E-01   .1096194E-01
   .1004388E-01   .9191977E-02   .8544133E-02   .8109234E-02   .7752916E-02
   .7294867E-02   .6668621E-02   .5946858E-02   .5286925E-02   .4945518E-02
   .5128209E-02   .5841724E-02   .6940106E-02   .8120417E-02   .9014631E-02
   .9322425E-02   .8974338E-02   .8204111E-02   .7385783E-02   .6848336E-02
   .6724553E-02   .6909342E-02   .7148665E-02   .7138962E-02   .6676329E-02
   .5665464E-02   .4139605E-02   .2299421E-02   .4358836E-03  -.1139548E-02
  -.2193120E-02  -.2686551E-02  -.2830611E-02  -.2922201E-02  -.3103600E-02
  -.3342676E-02  -.3498804E-02  -.3368852E-02  -.2881854E-02  -.2200419E-02
  -.1465811E-02  -.7052432E-03   .6902048E-04   .8599546E-03   .1734034E-02
   .2739919E-02   .3848060E-02   .5087551E-02   .6529933E-02   .8129670E-02
   .9723367E-02   .1113215E-01   .1226351E-01   .1308874E-01   .1359102E-01
   .1379396E-01   .1374506E-01   .1345931E-01   .1294359E-01   .1223242E-01
   .1135390E-01   .1035855E-01   .9413843E-02   .8762628E-02   .8568186E-02
   .8833624E-02   .9452289E-02   .1023532E-01   .1086688E-01   .1102812E-01
   .1061244E-01   .9768179E-02   .8755747E-02   .7752124E-02   .6771468E-02
   .5606768E-02   .3927982E-02   .1520009E-02  -.1646471E-02  -.5439102E-02
  -.9571070E-02  -.1371074E-01  -.1764906E-01  -.2127528E-01  -.2451905E-01
  -.2735225E-01  -.2975203E-01  -.3167000E-01  -.3298726E-01  -.3351770E-01
  -.3312506E-01  -.3179922E-01  -.2967236E-01  -.2702778E-01  -.2424059E-01
  -.2166346E-01  -.1945877E-01  -.1754909E-01  -.1577487E-01  -.1408037E-01
  -.1253438E-01  -.1133786E-01  -.1070675E-01  -.1076244E-01  -.1147183E-01
  -.1263655E-01  -.1394601E-01  -.1509183E-01  -.1585435E-01  -.1615646E-01
  -.1606101E-01  -.1559424E-01  -.1471136E-01  -.1341703E-01  -.1176989E-01
  -.9857531E-02  -.7765622E-02  -.5613633E-02  -.3546349E-02  -.1619772E-02
   .2266386E-03   .2136834E-02   .4220309E-02   .6404316E-02   .8428007E-02
   .1000966E-01   .1107646E-01   .1177827E-01   .1236756E-01   .1302671E-01
   .1373686E-01   .1431774E-01   .1455616E-01   .1438464E-01   .1396643E-01
   .1355635E-01   .1338037E-01   .1355324E-01   .1403569E-01   .1468960E-01
   .1532427E-01   .1575426E-01   .1586759E-01   .1557843E-01   .1480563E-01
   .1357410E-01   .1208715E-01   .1066488E-01   .9503020E-02   .8548084E-02
   .7626645E-02   .6559567E-02   .5278144E-02   .3830950E-02   .2303176E-02
   .8037683E-03  -.5989992E-03  -.1875466E-02  -.3027424E-02  -.4108636E-02
  -.5196415E-02  -.6317638E-02  -.7411529E-02  -.8429072E-02  -.9363401E-02
  -.1021138E-01  -.1100405E-01  -.1183647E-01  -.1275036E-01  -.1369251E-01
  -.1453827E-01  -.1514428E-01  -.1543162E-01  -.1544892E-01  -.1541274E-01
  -.1565094E-01  -.1641207E-01  -.1772561E-01  -.1938139E-01  -.2102577E-01
  -.2227221E-01  -.2285571E-01  -.2280917E-01  -.2240070E-01  -.2193269E-01
  -.2161680E-01  -.2141532E-01  -.2105738E-01  -.2026887E-01  -.1896073E-01
  -.1726494E-01  -.1544575E-01  -.1373810E-01  -.1229652E-01  -.1117375E-01
  -.1029189E-01  -.9485348E-02  -.8596418E-02  -.7573587E-02  -.6518678E-02
  -.5618244E-02  -.5022508E-02  -.4652399E-02  -.4213918E-02  -.3424160E-02
  -.2178853E-02  -.5615263E-03   .1190865E-02   .2740184E-02   .3846959E-02
   .4480330E-02   .4804589E-02   .5016175E-02   .5232337E-02   .5416671E-02
   .5380832E-02   .4951498E-02   .4068863E-02   .2935348E-02   .1957173E-02
   .1519484E-02   .1821263E-02   .2824789E-02   .4243511E-02   .5658437E-02
   .6707622E-02   .7264559E-02   .7462790E-02   .7479099E-02   .7461526E-02
   .7490573E-02   .7531301E-02   .7416622E-02   .6935404E-02   .5954007E-02
   .4588137E-02   .3148291E-02   .1897794E-02   .9173517E-03   .1965068E-03
  -.2648832E-03  -.4416527E-03  -.3045266E-03   .9503687E-04   .6002494E-03
   .1047090E-02   .1337640E-02   .1457472E-02   .1486011E-02   .1473751E-02
   .1372654E-02   .1135469E-02   .7798289E-03   .3481870E-03  -.1033258E-03
  -.4862655E-03  -.6908786E-03  -.6522318E-03  -.3294178E-03   .2893497E-03
   .1148479E-02   .2154383E-02   .3187189E-02   .4188322E-02   .5180270E-02
   .6189886E-02   .7177830E-02   .8002662E-02   .8486166E-02   .8524969E-02
   .8233588E-02   .7880566E-02   .7738093E-02   .7977624E-02   .8616003E-02
   .9600603E-02   .1086042E-01   .1229854E-01   .1378896E-01   .1523269E-01
   .1662695E-01   .1805613E-01   .1961346E-01   .2120656E-01   .2257065E-01
   .2349681E-01   .2396952E-01   .2410470E-01   .2404191E-01   .2392479E-01
   .2391153E-01   .2400818E-01   .2398910E-01   .2355171E-01   .2247208E-01
   .2074899E-01   .1859656E-01   .1626633E-01   .1400506E-01   .1201498E-01
   .1035891E-01   .8927330E-02   .7444728E-02   .5617820E-02   .3374371E-02
   .8981462E-03  -.1525454E-02  -.3679734E-02  -.5554969E-02  -.7299094E-02
  -.9025459E-02  -.1076836E-01  -.1249397E-01  -.1398461E-01  -.1493216E-01
  -.1509816E-01  -.1432686E-01  -.1257192E-01  -.1007245E-01  -.7387389E-02
  -.5068126E-02  -.3385532E-02  -.2363446E-02  -.1840373E-02  -.1532518E-02
  -.1188887E-02  -.7408592E-03  -.2628957E-03   .1316690E-03   .2654847E-03
  -.4846566E-04  -.8791350E-03  -.2153767E-02  -.3707140E-02  -.5323291E-02
  -.6795483E-02  -.7969949E-02  -.8811852E-02  -.9369460E-02  -.9641286E-02
  -.9561915E-02  -.9059697E-02  -.8077631E-02  -.6580513E-02  -.4611368E-02
  -.2444446E-02  -.4306606E-03   .1191811E-02   .2334787E-02   .3130245E-02
   .3853957E-02   .4752661E-02   .5967920E-02   .7565271E-02   .9475897E-02
   .1154118E-01   .1355498E-01   .1524278E-01   .1643169E-01   .1720109E-01
   .1778439E-01   .1836702E-01   .1900953E-01   .1971010E-01   .2039778E-01
   .2098183E-01   .2142802E-01   .2176711E-01   .2206897E-01   .2242238E-01
   .2290576E-01   .2353964E-01   .2430409E-01   .2514952E-01   .2597509E-01
   .2663063E-01   .2705284E-01   .2723375E-01   .2717373E-01   .2699019E-01
   .2689457E-01   .2697073E-01   .2712431E-01   .2715260E-01   .2691785E-01
   .2643944E-01   .2583581E-01   .2523713E-01   .2467898E-01   .2412944E-01
   .2353759E-01   .2279018E-01   .2169265E-01   .2010909E-01   .1813387E-01
   .1602859E-01   .1403368E-01   .1215949E-01   .1024304E-01   .8159817E-02
   .5921645E-02   .3603258E-02   .1289012E-02  -.9809256E-03  -.3151643E-02
  -.5082435E-02  -.6635627E-02  -.7720331E-02  -.8277378E-02  -.8299245E-02
  -.7893126E-02  -.7231363E-02  -.6458798E-02  -.5632911E-02  -.4780514E-02
  -.3932395E-02  -.3123329E-02  -.2399401E-02  -.1914917E-02  -.1947052E-02
  -.2777976E-02  -.4515293E-02  -.7006599E-02  -.9951476E-02  -.1299051E-01
  -.1578927E-01  -.1816926E-01  -.2012337E-01  -.2175301E-01  -.2317051E-01
  -.2441455E-01  -.2549136E-01  -.2640042E-01  -.2703079E-01  -.2727356E-01
  -.2719874E-01  -.2700208E-01  -.2684583E-01  -.2680492E-01  -.2688272E-01
  -.2702946E-01  -.2713389E-01  -.2704418E-01  -.2667632E-01  -.2606489E-01
  -.2524216E-01  -.2421865E-01  -.2299427E-01  -.2156210E-01  -.2000889E-01
  -.1847488E-01  -.1709301E-01  -.1594132E-01  -.1499568E-01  -.1413753E-01
  -.1333355E-01  -.1262256E-01  -.1191497E-01  -.1101767E-01  -.9807532E-02
  -.8351681E-02  -.6856855E-02  -.5506110E-02  -.4374021E-02  -.3399944E-02
  -.2385784E-02  -.1132887E-02   .4416201E-03   .2320579E-02   .4326583E-02
   .6178269E-02   .7698131E-02   .8893765E-02   .9886823E-02   .1081471E-01
   .1176666E-01   .1273987E-01   .1364499E-01   .1432873E-01   .1465719E-01
   .1462822E-01   .1429612E-01   .1367867E-01   .1274656E-01   .1150387E-01
   .1002569E-01   .8386248E-02   .6569118E-02   .4550811E-02   .2446009E-02
   .4949856E-03  -.1068187E-02  -.2164792E-02  -.2899726E-02  -.3446088E-02
  -.3965679E-02  -.4568172E-02  -.5290054E-02  -.6051685E-02  -.6714144E-02
  -.7179322E-02  -.7392194E-02  -.7320987E-02  -.6953477E-02  -.6264648E-02
  -.5227640E-02  -.3841036E-02  -.2151591E-02  -.2857564E-03   .1572890E-02
   .3272083E-02   .4671747E-02   .5706843E-02   .6499937E-02   .7218171E-02
   .8006996E-02   .9009508E-02   .1027072E-01   .1166857E-01   .1296967E-01
   .1398328E-01   .1465283E-01   .1505740E-01   .1530509E-01   .1547289E-01
   .1553970E-01   .1536274E-01   .1477159E-01   .1359256E-01   .1175330E-01
   .9424829E-02   .7055872E-02   .5195862E-02   .4141046E-02   .3880623E-02
   .4214854E-02   .4834357E-02   .5379965E-02   .5622436E-02   .5565580E-02
   .5377964E-02   .5321708E-02   .5610933E-02   .6318205E-02   .7350561E-02
   .8475675E-02   .9415868E-02   .9977390E-02   .1017213E-01   .1014792E-01
   .1010156E-01   .1010566E-01   .1004134E-01   .9784805E-02   .9344167E-02
   .8798263E-02   .8197518E-02   .7547324E-02   .6832349E-02   .6022722E-02
   .5059053E-02   .3909751E-02   .2654007E-02   .1402581E-02   .2233659E-03
  -.8016670E-03  -.1567007E-02  -.2007552E-02  -.2146908E-02  -.2102022E-02
  -.2015471E-02  -.1951906E-02  -.1932282E-02  -.1975014E-02  -.2105061E-02
  -.2297416E-02  -.2478452E-02  -.2659789E-02  -.2932804E-02  -.3383861E-02
  -.4020585E-02  -.4732266E-02  -.5339555E-02  -.5718643E-02  -.5863018E-02
  -.5839948E-02  -.5739302E-02  -.5663206E-02  -.5649586E-02  -.5643845E-02
  -.5547175E-02  -.5181490E-02  -.4367217E-02  -.3139724E-02  -.1743848E-02
  -.4947145E-03   .3037953E-03   .4833073E-03   .1219456E-03  -.5330880E-03
  -.1178020E-02  -.1601428E-02  -.1788845E-02  -.1863835E-02  -.1954280E-02
  -.2119569E-02  -.2333111E-02  -.2499579E-02  -.2509635E-02  -.2385746E-02
  -.2241035E-02  -.2210911E-02  -.2369309E-02  -.2686667E-02  -.3098796E-02
  -.3577091E-02  -.4125540E-02  -.4724216E-02  -.5313011E-02  -.5817972E-02
  -.6185229E-02  -.6383960E-02  -.6432227E-02  -.6364234E-02  -.6267245E-02
  -.6280660E-02  -.6473264E-02  -.6725991E-02  -.6909180E-02  -.7095156E-02
  -.7507223E-02  -.8377252E-02  -.9791114E-02  -.1157839E-01  -.1338401E-01
  -.1483637E-01  -.1568419E-01  -.1586345E-01  -.1556845E-01  -.1510828E-01
  -.1476097E-01  -.1470378E-01  -.1491865E-01  -.1521714E-01  -.1538139E-01
  -.1533714E-01  -.1521459E-01  -.1521300E-01  -.1553450E-01  -.1633544E-01
  -.1757574E-01  -.1896894E-01  -.2018102E-01  -.2095699E-01  -.2115785E-01
  -.2074495E-01  -.1982203E-01  -.1862453E-01  -.1737459E-01  -.1612061E-01
  -.1482130E-01  -.1353674E-01  -.1239040E-01  -.1147554E-01  -.1088275E-01
  -.1064256E-01  -.1068489E-01  -.1085706E-01  -.1100227E-01  -.1112016E-01
  -.1129554E-01  -.1157510E-01  -.1192714E-01  -.1221529E-01  -.1226855E-01
  -.1189704E-01  -.1093929E-01  -.9358810E-02  -.7276132E-02  -.4956611E-02
  -.2752495E-02  -.8779275E-03   .6989655E-03   .2206147E-02   .3925542E-02
   .6009087E-02   .8394465E-02   .1085019E-01   .1315947E-01   .1524338E-01
   .1718596E-01   .1927941E-01   .2178542E-01   .2460751E-01   .2735473E-01
   .2963661E-01   .3127511E-01   .3238284E-01   .3321575E-01   .3401494E-01
   .3491013E-01   .3584820E-01   .3668534E-01   .3732485E-01   .3775056E-01
   .3796723E-01   .3797811E-01   .3786060E-01   .3776148E-01   .3778967E-01
   .3798912E-01   .3832847E-01   .3868215E-01   .3885599E-01   .3865656E-01
   .3798406E-01   .3687273E-01   .3546176E-01   .3393839E-01   .3246131E-01
   .3107747E-01   .2972442E-01   .2833401E-01   .2688395E-01   .2538384E-01
   .2383897E-01   .2218142E-01   .2030625E-01   .1816844E-01   .1578049E-01
   .1317054E-01   .1031956E-01   .7299255E-02   .4380850E-02   .1882300E-02
  -.1583905E-03  -.2073863E-02  -.4254310E-02  -.6828580E-02  -.9641776E-02
  -.1244342E-01  -.1506991E-01  -.1744441E-01  -.1949010E-01  -.2113956E-01
  -.2241539E-01  -.2339083E-01  -.2413839E-01  -.2470538E-01  -.2513199E-01
  -.2540036E-01  -.2539995E-01  -.2499501E-01  -.2414239E-01  -.2295641E-01
  -.2167183E-01  -.2058598E-01  -.1998109E-01  -.1994831E-01  -.2033826E-01
  -.2082476E-01  -.2109674E-01  -.2101308E-01  -.2064965E-01  -.2019021E-01
  -.1984053E-01  -.1976607E-01  -.1996858E-01  -.2031284E-01  -.2066341E-01
  -.2093825E-01  -.2104737E-01  -.2092891E-01  -.2056674E-01  -.1995048E-01
  -.1913912E-01  -.1827962E-01  -.1752056E-01  -.1691705E-01  -.1637689E-01
  -.1579841E-01  -.1512387E-01  -.1438146E-01  -.1369009E-01  -.1318270E-01
  -.1292579E-01  -.1286229E-01  -.1284964E-01  -.1275496E-01  -.1247109E-01
  -.1191463E-01  -.1107242E-01  -.1001535E-01  -.8790398E-02  -.7392998E-02
  -.5870191E-02  -.4380461E-02  -.3112053E-02  -.2101359E-02  -.1232135E-02
  -.3594956E-03   .5765445E-03   .1554994E-02   .2469106E-02   .3160350E-02
   .3547485E-02   .3591068E-02   .3222265E-02   .2402701E-02   .1197104E-02
  -.3192641E-03  -.2146927E-02  -.4372824E-02  -.7080818E-02  -.1025113E-01
  -.1375782E-01  -.1726529E-01  -.2027273E-01  -.2234934E-01  -.2340290E-01
  -.2367111E-01  -.2350544E-01  -.2319188E-01  -.2286469E-01  -.2247467E-01
  -.2180072E-01  -.2059841E-01  -.1880193E-01  -.1664356E-01  -.1462240E-01
  -.1330770E-01  -.1302356E-01  -.1361869E-01  -.1453082E-01  -.1517673E-01
  -.1527570E-01  -.1486549E-01  -.1413862E-01  -.1329398E-01  -.1239191E-01
  -.1135633E-01  -.1008867E-01  -.8539915E-02  -.6735544E-02  -.4767318E-02
  -.2771912E-02  -.8774015E-03   .8094750E-03   .2250060E-02   .3486465E-02
   .4598647E-02   .5675464E-02   .6780262E-02   .7869199E-02   .8825254E-02
   .9537656E-02   .9981722E-02   .1034256E-01   .1089882E-01   .1182935E-01
   .1305979E-01   .1428073E-01   .1514271E-01   .1548617E-01   .1536118E-01
   .1487744E-01   .1413661E-01   .1317341E-01   .1202577E-01   .1079926E-01
   .9589773E-02   .8363791E-02   .7024307E-02   .5573619E-02   .4122552E-02
   .2847209E-02   .1919767E-02   .1449858E-02   .1393298E-02   .1500068E-02
   .1442459E-02   .1048035E-02   .3642866E-03  -.4064774E-03  -.1036359E-02
  -.1408719E-02  -.1524639E-02  -.1434990E-02  -.1181521E-02  -.7419781E-03
  -.6329903E-04   .8695551E-03   .2044498E-02   .3415926E-02   .4897009E-02
   .6420978E-02   .7954812E-02   .9483381E-02   .1095708E-01   .1227233E-01
   .1325938E-01   .1369790E-01   .1343846E-01   .1249067E-01   .1098599E-01
   .9136161E-02   .7131681E-02   .5132497E-02   .3288065E-02   .1697729E-02
   .4434711E-03  -.4190932E-03  -.9490110E-03  -.1359140E-02  -.1852738E-02
  -.2585148E-02  -.3585068E-02  -.4662480E-02  -.5603864E-02  -.6325012E-02
  -.6861042E-02  -.7332050E-02  -.7919831E-02  -.8767349E-02  -.9952086E-02
  -.1141739E-01  -.1296034E-01  -.1428999E-01  -.1517211E-01  -.1559599E-01
  -.1576398E-01  -.1598603E-01  -.1651902E-01  -.1745664E-01  -.1877533E-01
  -.2038300E-01  -.2211063E-01  -.2371286E-01  -.2496479E-01  -.2574625E-01
  -.2606674E-01  -.2608003E-01  -.2598513E-01  -.2589908E-01  -.2580428E-01
  -.2554055E-01  -.2488116E-01  -.2368840E-01  -.2199619E-01  -.1995451E-01
  -.1778018E-01  -.1565804E-01  -.1356127E-01  -.1134810E-01  -.8935948E-02
  -.6290778E-02  -.3450725E-02  -.4695936E-03   .2579664E-02   .5536474E-02
   .8188795E-02   .1042051E-01   .1223789E-01   .1373015E-01   .1497241E-01
   .1600952E-01   .1691952E-01   .1783913E-01   .1884870E-01   .1983353E-01
   .2062553E-01   .2118366E-01   .2155995E-01   .2178884E-01   .2185646E-01
   .2173297E-01   .2139553E-01   .2084695E-01   .2012926E-01   .1930921E-01
   .1847243E-01   .1774055E-01   .1718524E-01   .1676207E-01   .1637112E-01
   .1596273E-01   .1551904E-01   .1504637E-01   .1459088E-01   .1417853E-01
   .1369697E-01   .1289894E-01   .1160427E-01   .9857722E-02   .7909428E-02
   .6047587E-02   .4468715E-02   .3185772E-02   .2082545E-02   .1002557E-02
  -.1643920E-03  -.1386079E-02  -.2496148E-02  -.3240154E-02  -.3387247E-02
  -.2868310E-02  -.1805819E-02  -.4468700E-03   .9637956E-03   .2220824E-02
   .3188693E-02   .3830820E-02   .4249836E-02   .4614489E-02   .4999105E-02
   .5382358E-02   .5605374E-02   .5440988E-02   .4783459E-02   .3775668E-02
   .2697685E-02   .1786113E-02   .1152809E-02   .7407116E-03   .3740809E-03
  -.9830453E-04  -.7231842E-03  -.1440402E-02  -.2178851E-02  -.2940143E-02
  -.3727417E-02  -.4489205E-02  -.5155336E-02  -.5592403E-02  -.5634072E-02
  -.5249455E-02  -.4593101E-02  -.3915172E-02  -.3449350E-02  -.3358533E-02
  -.3719854E-02  -.4511115E-02  -.5660245E-02  -.7083761E-02  -.8672234E-02
  -.1035058E-01  -.1210509E-01  -.1394011E-01  -.1580487E-01  -.1758942E-01
  -.1912781E-01  -.2029008E-01  -.2104470E-01  -.2142251E-01  -.2153982E-01
  -.2157193E-01  -.2160754E-01  -.2159061E-01  -.2137167E-01  -.2077612E-01
  -.1966215E-01  -.1794843E-01  -.1568421E-01  -.1311281E-01  -.1056498E-01
  -.8289782E-02  -.6407651E-02  -.4849786E-02  -.3450022E-02  -.2077895E-02
  -.6050049E-03   .9716113E-03   .2543672E-02   .4000724E-02   .5221184E-02
   .6137316E-02   .6813192E-02   .7415796E-02   .8171890E-02   .9206866E-02
   .1047584E-01   .1178734E-01   .1289789E-01   .1366482E-01   .1403345E-01
   .1406758E-01   .1392496E-01   .1377929E-01   .1377555E-01   .1393510E-01
   .1417322E-01   .1435254E-01   .1437627E-01   .1427723E-01   .1420627E-01
   .1437975E-01   .1499587E-01   .1615935E-01   .1778382E-01   .1958384E-01
   .2125212E-01   .2260413E-01   .2355353E-01   .2406249E-01   .2413662E-01
   .2384853E-01   .2330125E-01   .2251483E-01   .2139732E-01   .1983790E-01
   .1780637E-01   .1535350E-01   .1263317E-01   .9882961E-02   .7433896E-02
   .5577102E-02   .4270269E-02   .3176815E-02   .1981264E-02   .5759937E-03
  -.1004770E-02  -.2698143E-02  -.4439530E-02  -.6151452E-02  -.7666301E-02
  -.8824164E-02  -.9520470E-02  -.9747261E-02  -.9506682E-02  -.8752045E-02
  -.7459342E-02  -.5621945E-02  -.3284386E-02  -.5595022E-03   .2393093E-02
   .5343181E-02   .8018223E-02   .1022116E-01   .1190489E-01   .1313760E-01
   .1405067E-01   .1478116E-01   .1540288E-01   .1589397E-01   .1614993E-01
   .1608787E-01   .1573836E-01   .1518976E-01   .1449103E-01   .1355130E-01
   .1221967E-01   .1044511E-01   .8383962E-02   .6398405E-02   .4853314E-02
   .3901853E-02   .3536462E-02   .3731320E-02   .4408037E-02   .5416545E-02
   .6568172E-02   .7759931E-02   .9053918E-02   .1054074E-01   .1218749E-01
   .1383173E-01   .1532371E-01   .1660798E-01   .1761235E-01   .1822015E-01
   .1840608E-01   .1828125E-01   .1805501E-01   .1794417E-01   .1798769E-01
   .1805341E-01   .1801339E-01   .1780677E-01   .1739712E-01   .1681780E-01
   .1622229E-01   .1574666E-01   .1539930E-01   .1505809E-01   .1454712E-01
   .1368903E-01   .1238029E-01   .1066342E-01   .8829997E-02   .7297960E-02
   .6253796E-02   .5492781E-02   .4561839E-02   .3081667E-02   .9693619E-03
  -.1555603E-02  -.4206236E-02  -.6817514E-02  -.9316107E-02  -.1170756E-01
  -.1409459E-01  -.1661605E-01  -.1932465E-01  -.2214482E-01  -.2487389E-01
  -.2734842E-01  -.2954140E-01  -.3142793E-01  -.3294061E-01  -.3408259E-01
  -.3490600E-01  -.3538512E-01  -.3541754E-01  -.3485151E-01  -.3363334E-01
  -.3185394E-01  -.2973223E-01  -.2755213E-01  -.2555700E-01  -.2386827E-01
  -.2248429E-01  -.2129565E-01  -.2012019E-01  -.1884226E-01  -.1746119E-01
  -.1601793E-01  -.1458334E-01  -.1324462E-01  -.1200215E-01  -.1074093E-01
  -.9303693E-02  -.7571712E-02  -.5547267E-02  -.3370510E-02  -.1248637E-02
   .5592865E-03   .1740276E-02   .2117112E-02   .1741015E-02   .7741443E-03
  -.5682602E-03  -.2087575E-02  -.3718405E-02  -.5566668E-02  -.7787349E-02
  -.1045369E-01  -.1346016E-01  -.1656018E-01  -.1951330E-01  -.2209883E-01
  -.2420814E-01  -.2589634E-01  -.2736261E-01  -.2882268E-01  -.3031868E-01
  -.3168624E-01  -.3268963E-01  -.3318226E-01  -.3310718E-01  -.3248278E-01
  -.3144286E-01  -.3021013E-01  -.2896542E-01  -.2779803E-01  -.2673902E-01
  -.2577829E-01  -.2485859E-01  -.2386275E-01  -.2272654E-01  -.2157433E-01
  -.2058119E-01  -.1983217E-01  -.1928371E-01  -.1888909E-01  -.1864326E-01
  -.1853275E-01  -.1850914E-01  -.1845908E-01  -.1825777E-01  -.1783112E-01
  -.1715378E-01  -.1629600E-01  -.1537497E-01  -.1446322E-01  -.1362453E-01
  -.1292609E-01  -.1245920E-01  -.1227402E-01  -.1231014E-01  -.1244842E-01
  -.1264018E-01  -.1294111E-01  -.1345952E-01  -.1423506E-01  -.1519227E-01
  -.1618728E-01  -.1707706E-01  -.1778739E-01  -.1828689E-01  -.1852496E-01
  -.1847459E-01  -.1820339E-01  -.1780928E-01  -.1732220E-01  -.1672826E-01
  -.1601374E-01  -.1516018E-01  -.1413272E-01  -.1289126E-01  -.1148348E-01
  -.1007603E-01  -.8822798E-02  -.7743687E-02  -.6684463E-02  -.5400405E-02
  -.3750954E-02  -.1782844E-02   .3340472E-03   .2407842E-02   .4247472E-02
   .5691752E-02   .6694585E-02   .7399074E-02   .8087360E-02   .9085924E-02
   .1058462E-01   .1253218E-01   .1458205E-01   .1630105E-01   .1750351E-01
   .1835165E-01   .1920878E-01   .2029452E-01   .2159015E-01   .2300671E-01
   .2444156E-01   .2578971E-01   .2693931E-01   .2775255E-01   .2809740E-01
   .2789879E-01   .2715864E-01   .2600996E-01   .2467001E-01   .2333388E-01
   .2214594E-01   .2115053E-01   .2021740E-01   .1913843E-01   .1780017E-01
   .1626750E-01   .1477715E-01   .1366925E-01   .1327547E-01   .1371765E-01
   .1478196E-01   .1610445E-01   .1742568E-01   .1869118E-01   .1995354E-01
   .2116543E-01   .2219296E-01   .2298665E-01   .2360555E-01   .2413852E-01
   .2462122E-01   .2500551E-01   .2517543E-01   .2502176E-01   .2451136E-01
   .2374415E-01   .2297251E-01   .2244888E-01   .2230330E-01   .2254543E-01
   .2307553E-01   .2377349E-01   .2452300E-01   .2519503E-01   .2573418E-01
   .2615512E-01   .2653336E-01   .2691784E-01   .2727731E-01   .2753416E-01
   .2760316E-01   .2746291E-01   .2715274E-01   .2676697E-01   .2638382E-01
   .2600234E-01   .2560179E-01   .2520511E-01   .2481367E-01   .2436467E-01
   .2378274E-01   .2302171E-01   .2212555E-01   .2122761E-01   .2046006E-01
   .1989480E-01   .1952324E-01   .1927668E-01   .1908740E-01   .1891848E-01
   .1879197E-01   .1880637E-01   .1902253E-01   .1944282E-01   .2004216E-01
   .2079841E-01   .2172737E-01   .2275468E-01   .2373493E-01   .2460099E-01
   .2535795E-01   .2597609E-01   .2634623E-01   .2629807E-01   .2570763E-01
   .2458009E-01   .2305393E-01   .2134289E-01   .1965890E-01   .1815608E-01
   .1688799E-01   .1580751E-01   .1481998E-01   .1388231E-01   .1306899E-01
   .1258375E-01   .1260741E-01   .1313026E-01   .1397216E-01   .1486740E-01
   .1556538E-01   .1588652E-01   .1573947E-01   .1510399E-01   .1406829E-01
   .1283322E-01   .1151955E-01   .1006577E-01   .8374219E-02   .6458236E-02
   .4409598E-02   .2258770E-02  -.4490263E-04  -.2553198E-02  -.5269373E-02
  -.8108600E-02  -.1099099E-01  -.1397278E-01  -.1715276E-01  -.2050365E-01
  -.2378619E-01  -.2666527E-01  -.2887095E-01  -.3030188E-01  -.3107284E-01
  -.3140925E-01  -.3147129E-01  -.3127591E-01  -.3075902E-01  -.2991981E-01
  -.2882448E-01  -.2754907E-01  -.2619084E-01  -.2492331E-01  -.2392975E-01
  -.2330772E-01  -.2303559E-01  -.2304067E-01  -.2322622E-01  -.2350166E-01
  -.2381888E-01  -.2417291E-01  -.2453398E-01  -.2483387E-01  -.2507313E-01
  -.2535962E-01  -.2583492E-01  -.2658531E-01  -.2751111E-01  -.2842859E-01
  -.2926131E-01  -.3004025E-01  -.3073488E-01  -.3132666E-01  -.3183716E-01
  -.3224214E-01  -.3246894E-01  -.3241332E-01  -.3202275E-01  -.3133857E-01
  -.3044310E-01  -.2935954E-01  -.2811684E-01  -.2681183E-01  -.2554485E-01
  -.2442300E-01  -.2351097E-01  -.2274950E-01  -.2197577E-01  -.2106552E-01
  -.1993138E-01  -.1854438E-01  -.1700014E-01  -.1547653E-01  -.1407255E-01
  -.1279942E-01  -.1160411E-01  -.1042174E-01  -.9234595E-02  -.8084673E-02
  -.7070407E-02  -.6273300E-02  -.5805373E-02  -.5775594E-02  -.6159548E-02
  -.6785301E-02  -.7386744E-02  -.7658576E-02  -.7413100E-02  -.6665936E-02
  -.5541807E-02  -.4196894E-02  -.2806816E-02  -.1493497E-02  -.2357349E-03
   .1148955E-02   .2910635E-02   .5134041E-02   .7630193E-02   .1001790E-01
   .1187105E-01   .1290426E-01   .1312907E-01   .1285486E-01   .1248910E-01
   .1236711E-01   .1258588E-01   .1291885E-01   .1296619E-01   .1239681E-01
   .1112927E-01   .9347423E-02   .7359311E-02   .5384122E-02   .3448262E-02
   .1484380E-02  -.6003472E-03  -.2828454E-02  -.5058092E-02  -.7063640E-02
  -.8705063E-02  -.1001154E-01  -.1105862E-01  -.1184762E-01  -.1227361E-01
  -.1221701E-01  -.1167973E-01  -.1079999E-01  -.9739716E-02  -.8631184E-02
  -.7633301E-02  -.6926774E-02  -.6609735E-02  -.6589942E-02  -.6716793E-02
  -.6875138E-02  -.7015634E-02  -.7172879E-02  -.7363141E-02  -.7628927E-02
  -.8088928E-02  -.8756839E-02  -.9496488E-02  -.1009458E-01  -.1034978E-01
  -.1022932E-01  -.9911018E-02  -.9659509E-02  -.9699892E-02  -.1014870E-01
  -.1092644E-01  -.1179920E-01  -.1253121E-01  -.1297718E-01  -.1311859E-01
  -.1302971E-01  -.1285435E-01  -.1275433E-01  -.1288409E-01  -.1328650E-01
  -.1375447E-01  -.1393057E-01  -.1353943E-01  -.1250833E-01  -.1102727E-01
  -.9495346E-02  -.8317295E-02  -.7653796E-02  -.7349886E-02  -.7133572E-02
  -.6776045E-02  -.6118010E-02  -.5129193E-02  -.3943776E-02  -.2722445E-02
  -.1533655E-02  -.2749747E-03   .1229449E-02   .3018863E-02   .4955623E-02
   .6847691E-02   .8500239E-02   .9703006E-02   .1032495E-01   .1038705E-01
   .9999256E-02   .9218969E-02   .8073236E-02   .6532852E-02   .4508244E-02
   .1983196E-02  -.8719794E-03  -.3750882E-02  -.6323302E-02  -.8342289E-02
  -.9717366E-02  -.1038210E-01  -.1029177E-01  -.9501158E-02  -.8141299E-02
  -.6357789E-02  -.4272544E-02  -.1982828E-02   .4005220E-03   .2733451E-02
   .4913835E-02   .6929352E-02   .8772917E-02   .1041414E-01   .1183329E-01
   .1301038E-01   .1392660E-01   .1458782E-01   .1505262E-01   .1546841E-01
   .1606261E-01   .1695020E-01   .1803745E-01   .1909630E-01   .1991769E-01
   .2043067E-01   .2071473E-01   .2085983E-01   .2092380E-01   .2093886E-01
   .2085496E-01   .2049965E-01   .1963715E-01   .1806642E-01   .1566211E-01
   .1243402E-01   .8739521E-02   .5189083E-02   .2231637E-02  -.8841231E-04
  -.2064667E-02  -.4075454E-02  -.6314469E-02  -.8708863E-02  -.1105351E-01
  -.1320283E-01  -.1512496E-01  -.1685544E-01  -.1843152E-01  -.1985990E-01
  -.2111679E-01  -.2217326E-01  -.2296378E-01  -.2340881E-01  -.2348502E-01
  -.2317499E-01  -.2248751E-01  -.2153256E-01  -.2045461E-01  -.1933714E-01
  -.1818974E-01  -.1695363E-01  -.1558095E-01  -.1412911E-01  -.1283907E-01
  -.1201626E-01  -.1179683E-01  -.1203584E-01  -.1243659E-01  -.1268451E-01
  -.1256976E-01  -.1212912E-01  -.1169563E-01  -.1167450E-01  -.1224099E-01
  -.1317772E-01  -.1402051E-01  -.1440398E-01  -.1421047E-01  -.1360642E-01
  -.1296167E-01  -.1267443E-01  -.1296478E-01  -.1380551E-01  -.1498618E-01
  -.1615731E-01  -.1701202E-01  -.1744977E-01  -.1750034E-01  -.1717761E-01
  -.1653313E-01  -.1565219E-01  -.1458520E-01  -.1341408E-01  -.1220456E-01
  -.1094985E-01  -.9600378E-02  -.8122702E-02  -.6602417E-02  -.5222542E-02
  -.4152514E-02  -.3508835E-02  -.3321750E-02  -.3501976E-02  -.3849680E-02
  -.4183565E-02  -.4370761E-02  -.4358440E-02  -.4234075E-02  -.4166148E-02
  -.4317660E-02  -.4764146E-02  -.5413875E-02  -.6003826E-02  -.6160383E-02
  -.5545123E-02  -.4050816E-02  -.1887325E-02   .4815059E-03   .2577224E-02
   .4120612E-02   .5187388E-02   .6138793E-02   .7296959E-02   .8755243E-02
   .1036327E-01   .1181750E-01   .1286259E-01   .1340460E-01   .1353016E-01
   .1340891E-01   .1320238E-01   .1299435E-01   .1275872E-01   .1238323E-01
   .1175614E-01   .1078919E-01   .9452388E-02   .7809324E-02   .5955419E-02
   .4002973E-02   .2082285E-02   .2518010E-03  -.1520304E-02  -.3287498E-02
  -.5056892E-02  -.6813673E-02  -.8496720E-02  -.9994201E-02  -.1118718E-01
  -.1197397E-01  -.1238773E-01  -.1254216E-01  -.1262237E-01  -.1291848E-01
  -.1370491E-01  -.1508304E-01  -.1690889E-01  -.1888493E-01  -.2071337E-01
  -.2219915E-01  -.2323259E-01  -.2380708E-01  -.2400882E-01  -.2395850E-01
  -.2381213E-01  -.2369999E-01  -.2365834E-01  -.2361709E-01  -.2343193E-01
  -.2289300E-01  -.2182060E-01  -.2019535E-01  -.1819966E-01  -.1618999E-01
  -.1446926E-01  -.1312491E-01  -.1204474E-01  -.1104358E-01  -.9962186E-02
  -.8789022E-02  -.7702189E-02  -.6900053E-02  -.6512124E-02  -.6591768E-02
  -.7111516E-02  -.7930687E-02  -.8779903E-02  -.9317310E-02  -.9265268E-02
  -.8529248E-02  -.7169083E-02  -.5382175E-02  -.3387413E-02  -.1209761E-02
   .1322770E-02   .4344411E-02   .7859122E-02   .1179102E-01   .1584691E-01
   .1964719E-01   .2307977E-01   .2636311E-01   .2976137E-01   .3332170E-01
   .3679288E-01   .3980415E-01   .4214393E-01   .4377782E-01   .4467638E-01
   .4476836E-01   .4401726E-01   .4247315E-01   .4017970E-01   .3717505E-01
   .3361050E-01   .2967243E-01   .2548028E-01   .2110131E-01   .1658144E-01
   .1202132E-01   .7665746E-02   .3852731E-02   .8392498E-03  -.1355461E-02
  -.2887529E-02  -.3830613E-02  -.4107225E-02  -.3706888E-02  -.2830669E-02
  -.1771296E-02  -.7316126E-03   .2978646E-03   .1478588E-02   .2987420E-02
   .4886774E-02   .7098344E-02   .9424022E-02   .1160846E-01   .1343807E-01
   .1487045E-01   .1606683E-01   .1726868E-01   .1872911E-01   .2054343E-01
   .2254543E-01   .2440506E-01   .2583579E-01   .2665685E-01   .2678527E-01
   .2618972E-01   .2485747E-01   .2278785E-01   .1987884E-01   .1588412E-01
   .1072785E-01   .4829564E-02  -.1057953E-02  -.6302206E-02  -.1072304E-01
  -.1452692E-01  -.1796172E-01  -.2107569E-01  -.2380837E-01  -.2618665E-01
  -.2825055E-01  -.2983673E-01  -.3062036E-01  -.3036787E-01  -.2913751E-01
  -.2729995E-01  -.2541333E-01  -.2394334E-01  -.2309617E-01  -.2283058E-01
  -.2286427E-01  -.2280701E-01  -.2237418E-01  -.2154504E-01  -.2049554E-01
  -.1945256E-01  -.1861192E-01  -.1814211E-01  -.1806209E-01  -.1820867E-01
  -.1831814E-01  -.1817810E-01  -.1775331E-01  -.1716169E-01  -.1660420E-01
  -.1632187E-01  -.1646503E-01  -.1702302E-01  -.1786490E-01  -.1880854E-01
  -.1973856E-01  -.2064999E-01  -.2159462E-01  -.2257095E-01  -.2351950E-01
  -.2435715E-01  -.2501065E-01  -.2547230E-01  -.2576686E-01  -.2593968E-01
  -.2610209E-01  -.2643299E-01  -.2710541E-01  -.2816356E-01  -.2945785E-01
  -.3074334E-01  -.3185389E-01  -.3280438E-01  -.3373583E-01  -.3479026E-01
  -.3601832E-01  -.3736121E-01  -.3866198E-01  -.3971872E-01  -.4045699E-01
  -.4103155E-01  -.4168930E-01  -.4258570E-01  -.4365586E-01  -.4464399E-01
  -.4531034E-01  -.4559813E-01  -.4555377E-01  -.4523263E-01  -.4473449E-01
  -.4421971E-01  -.4377657E-01  -.4333110E-01  -.4271088E-01  -.4176625E-01
  -.4043775E-01  -.3884077E-01  -.3718477E-01  -.3560746E-01  -.3416362E-01
  -.3283855E-01  -.3157651E-01  -.3030986E-01  -.2897261E-01  -.2755853E-01
  -.2620063E-01  -.2511247E-01  -.2441363E-01  -.2403924E-01  -.2388490E-01
  -.2388581E-01  -.2392725E-01  -.2387982E-01  -.2373336E-01  -.2361901E-01
  -.2373519E-01  -.2425763E-01  -.2521067E-01  -.2637174E-01  -.2739764E-01
  -.2805187E-01  -.2830246E-01  -.2819255E-01  -.2772733E-01  -.2677931E-01
  -.2521311E-01  -.2296621E-01  -.1990988E-01  -.1586225E-01  -.1061072E-01
  -.4059565E-02   .3563690E-02   .1168644E-01   .1950800E-01   .2632537E-01
   .3206371E-01   .3735806E-01   .4297742E-01   .4918620E-01   .5561548E-01
   .6156280E-01   .6652060E-01   .7042026E-01   .7347424E-01   .7596425E-01
   .7817970E-01   .8039935E-01   .8281945E-01   .8545181E-01   .8807956E-01
   .9037577E-01   .9208067E-01   .9308949E-01   .9358493E-01   .9404965E-01
   .9498000E-01   .9649584E-01   .9823723E-01   .9955609E-01   .9990432E-01
   .9906752E-01   .9715526E-01   .9454667E-01   .9176182E-01   .8915380E-01
   .8680502E-01   .8457039E-01   .8220439E-01   .7956311E-01   .7677768E-01
   .7423310E-01   .7232961E-01   .7122643E-01   .7075878E-01   .7055636E-01
   .7018885E-01   .6935672E-01   .6803025E-01   .6638570E-01   .6462477E-01
   .6281751E-01   .6080194E-01   .5828703E-01   .5501758E-01   .5087174E-01
   .4593200E-01   .4049257E-01   .3497239E-01   .2975967E-01   .2504530E-01
   .2081037E-01   .1683123E-01   .1278564E-01   .8577162E-02   .4500576E-02
   .9724807E-03  -.1857327E-02  -.4064103E-02  -.5730159E-02  -.6847955E-02
  -.7419498E-02  -.7625534E-02  -.7763324E-02  -.8096986E-02  -.8748406E-02
  -.9744018E-02  -.1102030E-01  -.1239886E-01  -.1362119E-01  -.1443597E-01
  -.1477901E-01  -.1482726E-01  -.1491321E-01  -.1541969E-01  -.1658783E-01
  -.1837174E-01  -.2045534E-01  -.2242298E-01  -.2397901E-01  -.2499931E-01
  -.2551365E-01  -.2570336E-01  -.2579686E-01  -.2597224E-01  -.2629468E-01
  -.2666140E-01  -.2677575E-01  -.2617682E-01  -.2442093E-01  -.2123843E-01
  -.1664479E-01  -.1097278E-01  -.4835901E-02   .1123335E-02   .6481184E-02
   .1108844E-01   .1495627E-01   .1822804E-01   .2114377E-01   .2386937E-01
   .2635894E-01   .2843874E-01   .2996645E-01   .3089810E-01   .3123476E-01
   .3101975E-01   .3030805E-01   .2912065E-01   .2750525E-01   .2568856E-01
   .2403880E-01   .2282963E-01   .2217281E-01   .2199732E-01   .2213111E-01
   .2239157E-01   .2261524E-01   .2270535E-01   .2269141E-01   .2262251E-01
   .2249623E-01   .2234430E-01   .2222084E-01   .2215438E-01   .2208221E-01
   .2178033E-01   .2092910E-01   .1932690E-01   .1700482E-01   .1413087E-01
   .1095912E-01   .7791593E-02   .4820244E-02   .2016186E-02  -.7808110E-03
  -.3660455E-02  -.6510727E-02  -.9060895E-02  -.1113769E-01  -.1283346E-01
  -.1443774E-01  -.1622652E-01  -.1817180E-01  -.1991611E-01  -.2102069E-01
  -.2124935E-01  -.2068904E-01  -.1969242E-01  -.1865561E-01  -.1781498E-01
  -.1713713E-01  -.1631868E-01  -.1505106E-01  -.1326780E-01  -.1101934E-01
  -.8471381E-02  -.5969705E-02  -.3886480E-02  -.2428028E-02  -.1577749E-02
  -.1071381E-02  -.4912204E-03   .5558339E-03   .2325236E-02   .4830538E-02
   .7819923E-02   .1085119E-01   .1349174E-01   .1559504E-01   .1739800E-01
   .1936017E-01   .2180278E-01   .2466065E-01   .2759167E-01   .3021263E-01
   .3234403E-01   .3401911E-01   .3535676E-01   .3642587E-01   .3719112E-01
   .3753873E-01   .3738469E-01   .3672394E-01   .3567111E-01   .3440330E-01
   .3306159E-01   .3173139E-01   .3040778E-01   .2902698E-01   .2744540E-01
   .2554635E-01   .2337106E-01   .2118284E-01   .1932691E-01   .1798288E-01
   .1710859E-01   .1649307E-01   .1581858E-01   .1473971E-01   .1294379E-01
   .1030407E-01   .7029255E-02   .3609517E-02   .4984800E-03  -.2171849E-02
  -.4588236E-02  -.7086145E-02  -.9947254E-02  -.1324907E-01  -.1688752E-01
  -.2055938E-01  -.2394735E-01  -.2696336E-01  -.2960088E-01  -.3177136E-01
  -.3339641E-01  -.3451275E-01  -.3533448E-01  -.3617208E-01  -.3720910E-01
  -.3841096E-01  -.3956181E-01  -.4038996E-01  -.4071866E-01  -.4055510E-01
  -.4006443E-01  -.3952922E-01  -.3914625E-01  -.3887334E-01  -.3851941E-01
  -.3792042E-01  -.3708780E-01  -.3621033E-01  -.3551022E-01  -.3506071E-01
  -.3480829E-01  -.3471757E-01  -.3481334E-01  -.3515842E-01  -.3581414E-01
  -.3675937E-01  -.3786020E-01  -.3893177E-01  -.3976554E-01  -.4014262E-01
  -.3988607E-01  -.3900615E-01  -.3773742E-01  -.3640343E-01  -.3524101E-01
  -.3429968E-01  -.3343226E-01  -.3242888E-01  -.3118233E-01  -.2979929E-01
  -.2856886E-01  -.2774029E-01  -.2743957E-01  -.2761548E-01  -.2802400E-01
  -.2836246E-01  -.2848451E-01  -.2847588E-01  -.2848142E-01  -.2860196E-01
  -.2880484E-01  -.2888695E-01  -.2854786E-01  -.2750415E-01  -.2562735E-01
  -.2303243E-01  -.2004191E-01  -.1709097E-01  -.1455781E-01  -.1259070E-01
  -.1108805E-01  -.9773396E-02  -.8390699E-02  -.6916605E-02  -.5569392E-02
  -.4684631E-02  -.4554260E-02  -.5232738E-02  -.6456784E-02  -.7725224E-02
  -.8465219E-02  -.8287140E-02  -.7149405E-02  -.5354148E-02  -.3409761E-02
  -.1735142E-02  -.4690746E-03   .5228773E-03   .1498407E-02   .2602079E-02
   .3800923E-02   .5008967E-02   .6144425E-02   .7088682E-02   .7718362E-02
   .7963110E-02   .7842498E-02   .7431854E-02   .6846889E-02   .6240807E-02
   .5712625E-02   .5197953E-02   .4515723E-02   .3522987E-02   .2185287E-02
   .6325337E-03  -.8770535E-03  -.2092641E-02  -.2884297E-02  -.3217535E-02
  -.3137326E-02  -.2715578E-02  -.2077570E-02  -.1354704E-02  -.5465904E-03
   .4350142E-03   .1678619E-02   .3208375E-02   .4973122E-02   .6786931E-02
   .8406757E-02   .9688622E-02   .1061520E-01   .1123149E-01   .1168680E-01
   .1225915E-01   .1319598E-01   .1455004E-01   .1602418E-01   .1711491E-01
   .1748502E-01   .1722706E-01   .1680814E-01   .1676300E-01   .1745259E-01
   .1892676E-01   .2087662E-01   .2283906E-01   .2448757E-01   .2575486E-01
   .2683800E-01   .2801010E-01   .2943445E-01   .3115397E-01   .3315575E-01
   .3535464E-01   .3751110E-01   .3930362E-01   .4056261E-01   .4139401E-01
   .4207542E-01   .4287521E-01   .4390643E-01   .4506918E-01   .4612126E-01
   .4675422E-01   .4667498E-01   .4580390E-01   .4428381E-01   .4233103E-01
   .4023183E-01   .3830706E-01   .3675529E-01   .3552176E-01   .3423265E-01
   .3246918E-01   .3008796E-01   .2722948E-01   .2419599E-01   .2123031E-01
   .1843755E-01   .1584032E-01   .1341027E-01   .1112358E-01   .9058263E-02
   .7280597E-02   .5757985E-02   .4421549E-02   .3280769E-02   .2452846E-02
   .1997033E-02   .1747924E-02   .1310760E-02   .3909617E-03  -.9406015E-03
  -.2437644E-02  -.3923888E-02  -.5403168E-02  -.7011460E-02  -.8942394E-02
  -.1143893E-01  -.1465595E-01  -.1848758E-01  -.2252291E-01  -.2612116E-01
  -.2865814E-01  -.2980903E-01  -.2964071E-01  -.2847245E-01  -.2672955E-01
  -.2481050E-01  -.2297195E-01  -.2130928E-01  -.1967840E-01  -.1776524E-01
  -.1533305E-01  -.1237768E-01  -.9160841E-02  -.6142816E-02  -.3764069E-02
  -.2245003E-02  -.1532917E-02  -.1401592E-02  -.1611000E-02  -.2024254E-02
  -.2653631E-02  -.3545005E-02  -.4604988E-02  -.5595167E-02  -.6277018E-02
  -.6526378E-02  -.6351623E-02  -.5847591E-02  -.5116695E-02  -.4204893E-02
  -.3107824E-02  -.1756444E-02  -.4755225E-04   .2083523E-02   .4608213E-02
   .7446109E-02   .1032596E-01   .1281146E-01   .1457856E-01   .1563843E-01
   .1630614E-01   .1681052E-01   .1708136E-01   .1690753E-01   .1615473E-01
   .1487869E-01   .1326534E-01   .1155433E-01   .9974807E-02   .8694017E-02
   .7747365E-02   .7044575E-02   .6425259E-02   .5677378E-02   .4661852E-02
   .3441872E-02   .2222258E-02   .1236107E-02   .5289228E-03  -.1026917E-03
  -.9765008E-03  -.2343210E-02  -.4291525E-02  -.6718355E-02  -.9362824E-02
  -.1201337E-01  -.1461496E-01  -.1712006E-01  -.1950222E-01  -.2186187E-01
  -.2436149E-01  -.2700564E-01  -.2956109E-01  -.3171558E-01  -.3321202E-01
  -.3383459E-01  -.3362728E-01  -.3295003E-01  -.3224023E-01  -.3178203E-01
  -.3161463E-01  -.3152690E-01  -.3112779E-01  -.3007819E-01  -.2828175E-01
  -.2591569E-01  -.2328461E-01  -.2066675E-01  -.1830180E-01  -.1631549E-01
  -.1460420E-01  -.1300571E-01  -.1150256E-01  -.1026128E-01  -.9452408E-02
  -.9074172E-02  -.8961903E-02  -.8892102E-02  -.8678408E-02  -.8224499E-02
  -.7494000E-02  -.6498660E-02  -.5280725E-02  -.3841138E-02  -.2100559E-02
   .6917082E-04   .2688498E-02   .5610814E-02   .8596350E-02   .1137627E-01
   .1369876E-01   .1539761E-01   .1642810E-01   .1686548E-01   .1682944E-01
   .1644061E-01   .1582357E-01   .1512555E-01   .1449797E-01   .1406049E-01
   .1385760E-01   .1381004E-01   .1378871E-01   .1368551E-01   .1348526E-01
   .1333035E-01   .1334876E-01   .1347356E-01   .1353488E-01   .1347063E-01
   .1339002E-01   .1347435E-01   .1382850E-01   .1436339E-01   .1489334E-01
   .1528008E-01   .1547435E-01   .1550575E-01   .1544957E-01   .1537547E-01
   .1536532E-01   .1550634E-01   .1579480E-01   .1614090E-01   .1638435E-01
   .1639392E-01   .1617731E-01   .1585234E-01   .1555428E-01   .1541203E-01
   .1549201E-01   .1581576E-01   .1638855E-01   .1722280E-01   .1835163E-01
   .1977463E-01   .2146166E-01   .2336756E-01   .2540491E-01   .2742132E-01
   .2922604E-01   .3061977E-01   .3153036E-01   .3204908E-01   .3237130E-01
   .3266777E-01   .3288988E-01   .3273161E-01   .3177853E-01   .2980530E-01
   .2689687E-01   .2339478E-01   .1976899E-01   .1643599E-01   .1356205E-01
   .1113070E-01   .9191204E-02   .7930623E-02   .7403861E-02   .7442115E-02
   .7821611E-02   .8423617E-02   .9284311E-02   .1042649E-01   .1169628E-01
   .1286152E-01   .1378052E-01   .1446675E-01   .1506994E-01   .1565401E-01
   .1600606E-01   .1579670E-01   .1489872E-01   .1339046E-01   .1147615E-01
   .9431621E-02   .7563988E-02   .6001294E-02   .4569747E-02   .2994696E-02
   .1153006E-02  -.8032477E-03  -.2539887E-02  -.3750093E-02  -.4313131E-02
  -.4343330E-02  -.4128495E-02  -.4087204E-02  -.4606837E-02  -.5822142E-02
  -.7554186E-02  -.9385791E-02  -.1083155E-01  -.1154724E-01  -.1142349E-01
  -.1062042E-01  -.9546641E-02  -.8655352E-02  -.8116333E-02  -.7678006E-02
  -.6790474E-02  -.4910442E-02  -.1939125E-02   .1678327E-02   .5258620E-02
   .8212309E-02   .1025651E-01   .1149531E-01   .1224313E-01   .1278881E-01
   .1331146E-01   .1385484E-01   .1432759E-01   .1464971E-01   .1483629E-01
   .1497470E-01   .1518404E-01   .1547239E-01   .1568530E-01   .1564484E-01
   .1532926E-01   .1490440E-01   .1460530E-01   .1460394E-01   .1493266E-01
   .1541046E-01   .1573334E-01   .1556193E-01   .1458961E-01   .1264042E-01
   .9799541E-02   .6479614E-02   .3241911E-02   .4933542E-03  -.1738989E-02
  -.3818441E-02  -.6163624E-02  -.8914200E-02  -.1189972E-01  -.1478833E-01
  -.1722412E-01  -.1891160E-01  -.1977425E-01  -.2000407E-01  -.1991742E-01
  -.1981322E-01  -.1975731E-01  -.1956363E-01  -.1892496E-01  -.1751393E-01
  -.1522049E-01  -.1232096E-01  -.9342766E-02  -.6766748E-02  -.4793246E-02
  -.3212693E-02  -.1433986E-02   .1153441E-02   .4712614E-02   .8737945E-02
   .1230822E-01   .1474045E-01   .1599295E-01   .1652261E-01   .1690171E-01
   .1755470E-01   .1876721E-01   .2064474E-01   .2291809E-01   .2493293E-01
   .2604185E-01   .2604160E-01   .2526233E-01   .2432626E-01   .2372852E-01
   .2358242E-01   .2368181E-01   .2363710E-01   .2302882E-01   .2163055E-01
   .1961776E-01   .1752426E-01   .1594614E-01   .1525093E-01   .1539098E-01
   .1596173E-01   .1645953E-01   .1647337E-01   .1584441E-01   .1473457E-01
   .1346298E-01   .1233888E-01   .1151286E-01   .1096621E-01   .1058984E-01
   .1029477E-01   .9975068E-02   .9372609E-02   .8231822E-02   .6545175E-02
   .4593988E-02   .2757911E-02   .1327116E-02   .4167632E-03  -.9012823E-04
  -.4776790E-03  -.1032969E-02  -.1899687E-02  -.3056276E-02  -.4382936E-02
  -.5747778E-02  -.7063827E-02  -.8271800E-02  -.9315600E-02  -.1022910E-01
  -.1113526E-01  -.1217139E-01  -.1341336E-01  -.1479844E-01  -.1607409E-01
  -.1689498E-01  -.1706671E-01  -.1666492E-01  -.1595384E-01  -.1527023E-01
  -.1490485E-01  -.1499798E-01  -.1547213E-01  -.1616472E-01  -.1689625E-01
  -.1760835E-01  -.1836628E-01  -.1916685E-01  -.1988614E-01  -.2035788E-01
  -.2046086E-01  -.2019575E-01  -.1976514E-01  -.1949473E-01  -.1955536E-01
  -.1976391E-01  -.1966003E-01  -.1877456E-01  -.1691684E-01  -.1431212E-01
  -.1157342E-01  -.9457055E-02  -.8449662E-02  -.8523943E-02  -.9178482E-02
  -.9692566E-02  -.9579364E-02  -.8815924E-02  -.7861387E-02  -.7391669E-02
  -.7913339E-02  -.9513297E-02  -.1179245E-01  -.1408271E-01  -.1580328E-01
  -.1676763E-01  -.1726304E-01  -.1786241E-01  -.1912425E-01  -.2130040E-01
  -.2417543E-01  -.2718350E-01  -.2969322E-01  -.3132655E-01  -.3213819E-01
  -.3250916E-01  -.3293531E-01  -.3380732E-01  -.3523282E-01  -.3708450E-01
  -.3908864E-01  -.4088550E-01  -.4215023E-01  -.4275748E-01  -.4275304E-01
  -.4230571E-01  -.4172254E-01  -.4123907E-01  -.4084075E-01  -.4023207E-01
  -.3894269E-01  -.3658184E-01  -.3307693E-01  -.2875291E-01  -.2418182E-01
  -.1987141E-01  -.1610058E-01  -.1291367E-01  -.1011232E-01  -.7361850E-02
  -.4416959E-02  -.1293241E-02   .1692319E-02   .4086215E-02   .5552338E-02
   .6096165E-02   .6136915E-02   .6288547E-02   .6954076E-02   .8082824E-02
   .9309362E-02   .1014047E-01   .1017930E-01   .9320372E-02   .7749649E-02
   .5839397E-02   .3956759E-02   .2303082E-02   .8546502E-03  -.5806691E-03
  -.2219877E-02  -.4195513E-02  -.6484066E-02  -.8924505E-02  -.1126043E-01
  -.1327267E-01  -.1487489E-01  -.1615673E-01  -.1730500E-01  -.1844762E-01
  -.1957216E-01  -.2054688E-01  -.2121432E-01  -.2151137E-01  -.2148747E-01
  -.2123161E-01  -.2076697E-01  -.2006672E-01  -.1910979E-01  -.1788421E-01
  -.1645659E-01  -.1495706E-01  -.1347441E-01  -.1204702E-01  -.1069126E-01
  -.9416541E-02  -.8247602E-02  -.7207790E-02  -.6313563E-02  -.5525737E-02
  -.4747969E-02  -.3853460E-02  -.2752058E-02  -.1495333E-02  -.2438718E-03
   .8505783E-03   .1747339E-02   .2490214E-02   .3165673E-02   .3911589E-02
   .4827412E-02   .5846069E-02   .6825427E-02   .7706602E-02   .8537909E-02
   .9385851E-02   .1030356E-01   .1132374E-01   .1243248E-01   .1352649E-01
   .1445505E-01   .1505124E-01   .1516570E-01   .1463815E-01   .1330685E-01
   .1119877E-01   .8691214E-02   .6298884E-02   .4266118E-02   .2441993E-02
   .5028828E-03  -.1776737E-02  -.4329180E-02  -.6853804E-02  -.8977446E-02
  -.1041256E-01  -.1111617E-01  -.1127415E-01  -.1125031E-01  -.1143123E-01
  -.1204110E-01  -.1305437E-01  -.1433995E-01  -.1579423E-01  -.1739801E-01
  -.1919942E-01  -.2120966E-01  -.2333371E-01  -.2545584E-01  -.2743127E-01
  -.2914009E-01  -.3050792E-01  -.3147260E-01  -.3205592E-01  -.3239274E-01
  -.3260618E-01  -.3268892E-01  -.3251541E-01  -.3204195E-01  -.3138547E-01
  -.3068520E-01  -.3001597E-01  -.2944443E-01  -.2904284E-01  -.2882671E-01
  -.2873417E-01  -.2865744E-01  -.2848563E-01  -.2812439E-01  -.2758412E-01
  -.2707709E-01  -.2694633E-01  -.2739642E-01  -.2832795E-01  -.2937963E-01
  -.3014876E-01  -.3043067E-01  -.3029262E-01  -.2998091E-01  -.2976258E-01
  -.2974029E-01  -.2974226E-01  -.2941538E-01  -.2838180E-01  -.2640095E-01
  -.2346459E-01  -.1985460E-01  -.1607250E-01  -.1256384E-01  -.9498807E-02
  -.6696813E-02  -.3808202E-02  -.6438410E-03   .2686054E-02   .5859643E-02
   .8522213E-02   .1042883E-01   .1157575E-01   .1219286E-01   .1263435E-01
   .1326061E-01   .1427202E-01   .1562578E-01   .1705393E-01   .1826179E-01
   .1923266E-01   .2025004E-01   .2163941E-01   .2356995E-01   .2602573E-01
   .2889087E-01   .3201690E-01   .3521544E-01   .3826899E-01   .4106088E-01
   .4356613E-01   .4574877E-01   .4752689E-01   .4881907E-01   .4959461E-01
   .4987082E-01   .4968431E-01   .4910994E-01   .4836992E-01   .4772287E-01
   .4732718E-01   .4718315E-01   .4712166E-01   .4686079E-01   .4619205E-01
   .4515826E-01   .4404055E-01   .4312602E-01   .4254840E-01   .4232978E-01
   .4240034E-01   .4257742E-01   .4263015E-01   .4234797E-01   .4163350E-01
   .4060979E-01   .3952521E-01   .3852078E-01   .3752063E-01   .3631810E-01
   .3471335E-01   .3257357E-01   .2982560E-01   .2652595E-01   .2292543E-01
   .1940865E-01   .1628663E-01   .1359363E-01   .1123803E-01   .9171135E-02
   .7360842E-02   .5793286E-02   .4482692E-02   .3416098E-02   .2544284E-02
   .1741338E-02   .8074219E-03  -.3988640E-03  -.1885259E-02  -.3634281E-02
  -.5593367E-02  -.7610443E-02  -.9429497E-02  -.1089842E-01  -.1214851E-01
  -.1350202E-01  -.1526349E-01  -.1759411E-01  -.2046031E-01  -.2366157E-01
  -.2698284E-01  -.3019224E-01  -.3304849E-01  -.3543504E-01  -.3737824E-01
  -.3901013E-01  -.4044690E-01  -.4173859E-01  -.4284044E-01  -.4355577E-01
  -.4366927E-01  -.4305961E-01  -.4170968E-01  -.3979179E-01  -.3758118E-01
  -.3531219E-01  -.3306374E-01  -.3074141E-01  -.2817820E-01  -.2527787E-01
  -.2210853E-01  -.1886593E-01  -.1577899E-01  -.1306593E-01  -.1091642E-01
  -.9382197E-02  -.8365213E-02  -.7692024E-02  -.7148849E-02  -.6627319E-02
  -.6172427E-02  -.5945496E-02  -.6179240E-02  -.6948227E-02  -.7971060E-02
  -.8758601E-02  -.8865254E-02  -.8047465E-02  -.6395275E-02  -.4242643E-02
  -.1999505E-02   .1645730E-04   .1753887E-02   .3391749E-02   .5163704E-02
   .7184991E-02   .9421431E-02   .1170842E-01   .1384289E-01   .1574116E-01
   .1748672E-01   .1926401E-01   .2115985E-01   .2302058E-01   .2458059E-01
   .2576053E-01   .2669984E-01   .2759681E-01   .2853978E-01   .2938324E-01
   .2989597E-01   .2996082E-01   .2962781E-01   .2906593E-01   .2842922E-01
   .2776383E-01   .2703493E-01   .2616665E-01   .2518400E-01   .2422283E-01
   .2338443E-01   .2264864E-01   .2194463E-01   .2119226E-01   .2032634E-01
   .1932940E-01   .1820296E-01   .1701140E-01   .1586579E-01   .1478954E-01
   .1362940E-01   .1212442E-01   .1020323E-01   .8134013E-02   .6396207E-02
   .5278523E-02   .4691212E-02   .4341485E-02   .3993902E-02   .3492471E-02
   .2702808E-02   .1572610E-02   .2362304E-03  -.9852989E-03  -.1858095E-02
  -.2456140E-02  -.3018343E-02  -.3694321E-02  -.4401703E-02  -.4865850E-02
  -.4824250E-02  -.4199161E-02  -.3121467E-02  -.1854010E-02  -.6633275E-03
   .3601068E-03   .1332736E-02   .2421467E-02   .3681230E-02   .4959992E-02
   .5989366E-02   .6519524E-02   .6444404E-02   .5873549E-02   .5018173E-02
   .4084317E-02   .3235313E-02   .2442241E-02   .1532428E-02   .4488062E-03
  -.7204669E-03  -.1796536E-02  -.2640249E-02  -.3262927E-02  -.3727027E-02
  -.3998473E-02  -.3966576E-02  -.3531698E-02  -.2738899E-02  -.1893173E-02
  -.1384845E-02  -.1423914E-02  -.1960043E-02  -.2755813E-02  -.3528139E-02
  -.4102559E-02  -.4506565E-02  -.4989088E-02  -.5887475E-02  -.7387260E-02
  -.9501479E-02  -.1206850E-01  -.1479618E-01  -.1739492E-01  -.1965888E-01
  -.2147288E-01  -.2283253E-01  -.2380708E-01  -.2446524E-01  -.2484087E-01
  -.2490711E-01  -.2462259E-01  -.2398631E-01  -.2309161E-01  -.2213269E-01
  -.2131673E-01  -.2078186E-01  -.2050678E-01  -.2027186E-01  -.1978565E-01
  -.1888533E-01  -.1767718E-01  -.1648549E-01  -.1569943E-01  -.1553386E-01
  -.1588145E-01  -.1635598E-01  -.1650614E-01  -.1607690E-01  -.1508607E-01
  -.1377662E-01  -.1248633E-01  -.1145822E-01  -.1071967E-01  -.1004730E-01
  -.9176385E-02  -.8097961E-02  -.6967645E-02  -.5984468E-02  -.5315285E-02
  -.5068270E-02  -.5332032E-02  -.6040615E-02  -.6891853E-02  -.7477325E-02
  -.7558058E-02  -.7255323E-02  -.6955276E-02  -.7005833E-02  -.7425547E-02
  -.7864198E-02  -.7905159E-02  -.7413775E-02  -.6649470E-02  -.6142775E-02
  -.6402266E-02  -.7598695E-02  -.9455781E-02  -.1135069E-01  -.1255673E-01
  -.1265162E-01  -.1174413E-01  -.1034832E-01  -.8956301E-02  -.7855050E-02
  -.7064294E-02  -.6326541E-02  -.5289876E-02  -.3755214E-02  -.1810043E-02
   .2008659E-03   .1854782E-02   .2836891E-02   .3077223E-02   .2705184E-02
   .1973294E-02   .1231639E-02   .8150322E-03   .8375324E-03   .1122539E-02
   .1237628E-02   .7078826E-03  -.7945192E-03  -.3294621E-02  -.6453978E-02
  -.9709225E-02  -.1254881E-01  -.1479260E-01  -.1660560E-01  -.1831062E-01
  -.2018694E-01  -.2235692E-01  -.2462528E-01  -.2664401E-01  -.2813262E-01
  -.2895085E-01  -.2916247E-01  -.2899593E-01  -.2874859E-01  -.2870454E-01
  -.2909031E-01  -.2996253E-01  -.3109933E-01  -.3206457E-01  -.3242032E-01
  -.3194027E-01  -.3073503E-01  -.2927379E-01  -.2812637E-01  -.2766674E-01
  -.2786248E-01  -.2826153E-01  -.2824769E-01  -.2740022E-01  -.2570476E-01
  -.2357951E-01  -.2157372E-01  -.1998348E-01  -.1881262E-01  -.1788833E-01
  -.1697928E-01  -.1588412E-01  -.1445717E-01  -.1261065E-01  -.1036577E-01
  -.7990805E-02  -.5942729E-02  -.4631549E-02  -.4201580E-02  -.4452573E-02
  -.4936535E-02  -.5207174E-02  -.5012804E-02  -.4295427E-02  -.3132105E-02
  -.1718017E-02  -.2346242E-03   .1287690E-02   .2999952E-02   .5204699E-02
   .8090317E-02   .1151644E-01   .1504783E-01   .1817589E-01   .2053712E-01
   .2218478E-01   .2355194E-01   .2504611E-01   .2681224E-01   .2877863E-01
   .3080472E-01   .3282801E-01   .3478426E-01   .3649831E-01   .3779775E-01
   .3867053E-01   .3932963E-01   .4006185E-01   .4100790E-01   .4218623E-01
   .4359827E-01   .4521005E-01   .4694753E-01   .4869072E-01   .5028391E-01
   .5169185E-01   .5289933E-01   .5382331E-01   .5436388E-01   .5449106E-01
   .5426067E-01   .5373761E-01   .5295577E-01   .5189875E-01   .5053553E-01
   .4893390E-01   .4715265E-01   .4515193E-01   .4286662E-01   .4028984E-01
   .3749727E-01   .3458903E-01   .3165079E-01   .2870076E-01   .2571141E-01
   .2269790E-01   .1972250E-01   .1676021E-01   .1365977E-01   .1031337E-01
   .6881818E-02   .3744799E-02   .1215778E-02  -.6479681E-03  -.1971638E-02
  -.2912493E-02  -.3596011E-02  -.4153730E-02  -.4723690E-02  -.5395338E-02
  -.6010625E-02  -.6253931E-02  -.5971486E-02  -.5244341E-02  -.4313265E-02
  -.3427069E-02  -.2688115E-02  -.2044104E-02  -.1393609E-02  -.6467931E-03
   .2261699E-03   .1126346E-02   .1864171E-02   .2273269E-02   .2323309E-02
   .2089491E-02   .1690529E-02   .1262179E-02   .9206192E-03   .7475053E-03
   .7931479E-03   .1010712E-02   .1248305E-02   .1348777E-02   .1193179E-02
   .7163733E-03  -.9295156E-04  -.1221283E-02  -.2594714E-02  -.4069686E-02
  -.5516363E-02  -.6855025E-02  -.8161704E-02  -.9654300E-02  -.1152872E-01
  -.1383585E-01  -.1645617E-01  -.1912774E-01  -.2147654E-01  -.2315707E-01
  -.2399480E-01  -.2404794E-01  -.2358209E-01  -.2299242E-01  -.2267526E-01
  -.2289631E-01  -.2361800E-01  -.2443379E-01  -.2480976E-01  -.2436024E-01
  -.2298193E-01  -.2091912E-01  -.1868215E-01  -.1691936E-01  -.1607580E-01
  -.1607244E-01  -.1641694E-01  -.1655318E-01  -.1614354E-01  -.1518493E-01
  -.1391094E-01  -.1261686E-01  -.1148169E-01  -.1050354E-01  -.9594364E-02
  -.8610085E-02  -.7487348E-02  -.6308019E-02  -.5264829E-02  -.4545483E-02
  -.4197762E-02  -.4139195E-02  -.4245333E-02  -.4451013E-02  -.4740366E-02
  -.5076094E-02  -.5427051E-02  -.5814404E-02  -.6260766E-02  -.6739122E-02
  -.7161299E-02  -.7360347E-02  -.7115377E-02  -.6307796E-02  -.5026379E-02
  -.3561615E-02  -.2269666E-02  -.1353461E-02  -.7874060E-03  -.4374994E-03
  -.1457341E-03   .1984104E-03   .5597615E-03   .7611488E-03   .6196033E-03
   .2906139E-04  -.9845917E-03  -.2221961E-02  -.3372593E-02  -.4153646E-02
  -.4397790E-02  -.4111174E-02  -.3483355E-02  -.2743035E-02  -.2041275E-02
  -.1411606E-02  -.7866814E-03  -.7196290E-04   .7431811E-03   .1600381E-02
   .2391595E-02   .2878313E-02   .2855278E-02   .2283873E-02   .1259813E-02
  -.2632713E-04  -.1343007E-02  -.2539775E-02  -.3566288E-02  -.4428630E-02
  -.5200586E-02  -.6077950E-02  -.7294310E-02  -.8962372E-02  -.1095362E-01
  -.1297714E-01  -.1478415E-01  -.1627246E-01  -.1749665E-01  -.1861794E-01
  -.1974766E-01  -.2088821E-01  -.2200348E-01  -.2303611E-01  -.2388378E-01
  -.2449992E-01  -.2496684E-01  -.2536139E-01  -.2568748E-01  -.2589408E-01
  -.2593624E-01  -.2575550E-01  -.2525938E-01  -.2437085E-01  -.2308378E-01
  -.2145602E-01  -.1958540E-01  -.1753074E-01  -.1534698E-01  -.1311108E-01
  -.1092640E-01  -.9016803E-02  -.7679054E-02  -.7089535E-02  -.7165730E-02
  -.7517944E-02  -.7646361E-02  -.7263453E-02  -.6472739E-02  -.5679943E-02
  -.5371149E-02  -.5822986E-02  -.6967632E-02  -.8428699E-02  -.9708936E-02
  -.1053380E-01  -.1101514E-01  -.1157784E-01  -.1262397E-01  -.1427876E-01
  -.1637888E-01  -.1855621E-01  -.2035456E-01  -.2143811E-01  -.2179289E-01
  -.2174714E-01  -.2171914E-01  -.2198439E-01  -.2255793E-01  -.2319236E-01
  -.2349614E-01  -.2312924E-01  -.2199253E-01  -.2026814E-01  -.1836785E-01
  -.1672798E-01  -.1557247E-01  -.1487345E-01  -.1439070E-01  -.1376398E-01
  -.1270440E-01  -.1111547E-01  -.9131932E-02  -.7030008E-02  -.5103608E-02
  -.3536661E-02  -.2327037E-02  -.1359341E-02  -.4890061E-03   .3709080E-03
   .1223700E-02   .2040723E-02   .2728567E-02   .3176231E-02   .3377490E-02
   .3399776E-02   .3171741E-02   .2507060E-02   .1379227E-02  -.5567202E-05
  -.1379079E-02  -.2529649E-02  -.3319581E-02  -.3740410E-02  -.3887858E-02
  -.3907890E-02  -.3987037E-02  -.4257106E-02  -.4785509E-02  -.5605575E-02
  -.6689468E-02  -.7924973E-02  -.9150415E-02  -.1028426E-01  -.1135703E-01
  -.1246856E-01  -.1375503E-01  -.1529274E-01  -.1700743E-01  -.1873033E-01
  -.2022032E-01  -.2122100E-01  -.2155772E-01  -.2119188E-01  -.2023627E-01
  -.1898660E-01  -.1780501E-01  -.1691642E-01  -.1630163E-01  -.1570182E-01
  -.1476795E-01  -.1332964E-01  -.1149959E-01  -.9569260E-02  -.7829249E-02
  -.6425637E-02  -.5361072E-02  -.4466053E-02  -.3481384E-02  -.2223242E-02
  -.6588261E-03   .1183283E-02   .3293703E-02   .5684399E-02   .8328095E-02
   .1121460E-01   .1437277E-01   .1779892E-01   .2134941E-01   .2483111E-01
   .2824007E-01   .3175858E-01   .3543154E-01   .3902599E-01   .4222176E-01
   .4486980E-01   .4700557E-01   .4870945E-01   .5001889E-01   .5089380E-01
   .5127146E-01   .5110803E-01   .5033239E-01   .4892729E-01   .4699323E-01
   .4473048E-01   .4234948E-01   .3997807E-01   .3765139E-01   .3531596E-01
   .3287012E-01   .3025071E-01   .2753902E-01   .2498666E-01   .2289641E-01
   .2149871E-01   .2087440E-01   .2093154E-01   .2150274E-01   .2240406E-01
   .2339518E-01   .2422530E-01   .2475112E-01   .2499913E-01   .2508956E-01
   .2515642E-01   .2533714E-01   .2563522E-01   .2588872E-01   .2587638E-01
   .2546746E-01   .2469857E-01   .2368319E-01   .2256273E-01   .2149267E-01
   .2059625E-01   .1986195E-01   .1906352E-01   .1789569E-01   .1613971E-01
   .1378710E-01   .1113795E-01   .8609915E-02   .6453018E-02   .4585619E-02
   .2740289E-02   .8064506E-03  -.1158764E-02  -.3075288E-02  -.4861180E-02
  -.6406288E-02  -.7642711E-02  -.8522220E-02  -.9021412E-02  -.9176142E-02
  -.8994738E-02  -.8420616E-02  -.7450247E-02  -.6121497E-02  -.4531937E-02
  -.2882548E-02  -.1375019E-02  -.3496189E-04   .1300980E-02   .2838467E-02
   .4671084E-02   .6720562E-02   .8825992E-02   .1083974E-01   .1265496E-01
   .1423057E-01   .1554763E-01   .1659855E-01   .1744903E-01   .1820717E-01
   .1888535E-01   .1937057E-01   .1952581E-01   .1922239E-01   .1837486E-01
   .1698991E-01   .1514654E-01   .1303251E-01   .1098628E-01   .9281675E-02
   .7795202E-02   .6153501E-02   .4163025E-02   .2004917E-02   .5267950E-04
  -.1341214E-02  -.2018364E-02  -.2056222E-02  -.1718866E-02  -.1434957E-02
  -.1607662E-02  -.2316387E-02  -.3262331E-02  -.4032856E-02  -.4385948E-02
  -.4372603E-02  -.4231874E-02  -.4215445E-02  -.4453088E-02  -.4905872E-02
  -.5438535E-02  -.5887763E-02  -.6147703E-02  -.6239527E-02  -.6224903E-02
  -.6147180E-02  -.6102911E-02  -.6276565E-02  -.6809288E-02  -.7640260E-02
  -.8447635E-02  -.8853404E-02  -.8629814E-02  -.7749123E-02  -.6369535E-02
  -.4789868E-02  -.3339837E-02  -.2133742E-02  -.1011277E-02   .3179136E-03
   .2134793E-02   .4568275E-02   .7523069E-02   .1067592E-01   .1354422E-01
   .1573465E-01   .1717584E-01   .1816694E-01   .1923184E-01   .2083500E-01
   .2310650E-01   .2584230E-01   .2878341E-01   .3171959E-01   .3445497E-01
   .3684601E-01   .3884015E-01   .4051199E-01   .4207452E-01   .4377121E-01
   .4570323E-01   .4774186E-01   .4964165E-01   .5113508E-01   .5208050E-01
   .5249163E-01   .5243209E-01   .5202306E-01   .5141760E-01   .5071558E-01
   .4996969E-01   .4914403E-01   .4813886E-01   .4685649E-01   .4520088E-01
   .4312246E-01   .4071708E-01   .3823729E-01   .3596216E-01   .3403484E-01
   .3246331E-01   .3113210E-01   .2988023E-01   .2858452E-01   .2719745E-01
   .2567201E-01   .2395845E-01   .2208844E-01   .2021109E-01   .1846830E-01
   .1686849E-01   .1528354E-01   .1344819E-01   .1107043E-01   .8104589E-02
   .4898130E-02   .1937685E-02  -.4283431E-03  -.2117708E-02  -.3277293E-02
  -.4115668E-02  -.4855247E-02  -.5693249E-02  -.6744319E-02  -.8008298E-02
  -.9318674E-02  -.1039053E-01  -.1102467E-01  -.1125098E-01  -.1126648E-01
  -.1129270E-01  -.1149718E-01  -.1195907E-01  -.1264376E-01  -.1332332E-01
  -.1375057E-01  -.1378284E-01  -.1333056E-01  -.1239332E-01  -.1112994E-01
  -.9894578E-02  -.9057425E-02  -.8738312E-02  -.8759471E-02  -.8709007E-02
  -.8245794E-02  -.7322306E-02  -.6156292E-02  -.5128292E-02  -.4606629E-02
  -.4843798E-02  -.5829628E-02  -.7224760E-02  -.8545843E-02  -.9434958E-02
  -.9792572E-02  -.9749902E-02  -.9619080E-02  -.9774073E-02  -.1046836E-01
  -.1166361E-01  -.1288603E-01  -.1353321E-01  -.1330723E-01  -.1233000E-01
  -.1110348E-01  -.1031685E-01  -.1052016E-01  -.1183344E-01  -.1390052E-01
  -.1615781E-01  -.1816111E-01  -.1970429E-01  -.2093374E-01  -.2227500E-01
  -.2411618E-01  -.2658873E-01  -.2953583E-01  -.3260084E-01  -.3543539E-01
  -.3785819E-01  -.3989878E-01  -.4166408E-01  -.4322564E-01  -.4460447E-01
  -.4583315E-01  -.4698746E-01  -.4809520E-01  -.4916119E-01  -.5018311E-01
  -.5114871E-01  -.5205847E-01  -.5289973E-01  -.5362479E-01  -.5418199E-01
  -.5448932E-01  -.5445746E-01  -.5412890E-01  -.5356435E-01  -.5279917E-01
  -.5191355E-01  -.5098525E-01  -.5001330E-01  -.4893178E-01  -.4771162E-01
  -.4643090E-01  -.4526808E-01  -.4436157E-01  -.4375203E-01  -.4335119E-01
  -.4285788E-01  -.4187699E-01  -.4012750E-01  -.3754822E-01  -.3421940E-01
  -.3029879E-01  -.2598570E-01  -.2141188E-01  -.1659189E-01  -.1151702E-01
  -.6190028E-02  -.6568076E-03   .4927578E-02   .1024086E-01   .1486169E-01
   .1846194E-01   .2105395E-01   .2301687E-01   .2478711E-01   .2654799E-01
   .2815446E-01   .2934592E-01   .2999333E-01   .3016226E-01   .2991484E-01
   .2929832E-01   .2846037E-01   .2755152E-01   .2657329E-01   .2545034E-01
   .2414121E-01   .2262659E-01   .2085439E-01   .1870947E-01   .1608588E-01
   .1298981E-01   .9696331E-02   .6617668E-02   .3938377E-02   .1462323E-02
  -.1115506E-02  -.3928961E-02  -.6920392E-02  -.9918514E-02  -.1272869E-01
  -.1521305E-01  -.1732536E-01  -.1913880E-01  -.2076191E-01  -.2221863E-01
  -.2334798E-01  -.2388724E-01  -.2366025E-01  -.2271071E-01  -.2128537E-01
  -.1962818E-01  -.1787922E-01  -.1607610E-01  -.1414050E-01  -.1197447E-01
  -.9663828E-02  -.7479414E-02  -.5681531E-02  -.4347378E-02  -.3297788E-02
  -.2215983E-02  -.8223794E-03   .9412618E-03   .2923727E-02   .4841995E-02
   .6434740E-02   .7605088E-02   .8461322E-02   .9198430E-02   .9900618E-02
   .1043432E-01   .1059132E-01   .1028569E-01   .9626687E-02   .8870099E-02
   .8242606E-02   .7805005E-02   .7523651E-02   .7324168E-02   .7152110E-02
   .6993975E-02   .6846096E-02   .6781141E-02   .7001926E-02   .7783139E-02
   .9312930E-02   .1153039E-01   .1410676E-01   .1656813E-01   .1859645E-01
   .2022449E-01   .2172435E-01   .2334229E-01   .2514924E-01   .2702949E-01
   .2882856E-01   .3038060E-01   .3159257E-01   .3252411E-01   .3327519E-01
   .3390556E-01   .3442603E-01   .3486422E-01   .3523295E-01   .3548136E-01
   .3559529E-01   .3556352E-01   .3529020E-01   .3464207E-01   .3355168E-01
   .3206046E-01   .3024054E-01   .2821480E-01   .2609453E-01   .2393323E-01
   .2172159E-01   .1941650E-01   .1688900E-01   .1397481E-01   .1077691E-01
   .7783977E-02   .5508884E-02   .4106227E-02   .3343540E-02   .2804660E-02
   .2121762E-02   .1180092E-02   .1007243E-03  -.8725649E-03  -.1489726E-02
  -.1547938E-02  -.9821402E-03   .9812501E-04   .1419107E-02   .2672513E-02
   .3675454E-02   .4485350E-02   .5396465E-02   .6685155E-02   .8405211E-02
   .1036335E-01   .1222856E-01   .1371041E-01   .1470340E-01   .1527651E-01
   .1558960E-01   .1577630E-01   .1582170E-01   .1561108E-01   .1505567E-01
   .1420813E-01   .1324708E-01   .1238110E-01   .1168977E-01   .1105405E-01
   .1023951E-01   .9109328E-02   .7766654E-02   .6529570E-02   .5780060E-02
   .5802165E-02   .6582319E-02   .7771649E-02   .8878395E-02   .9494323E-02
   .9517481E-02   .9194575E-02   .9028094E-02   .9504728E-02   .1087943E-01
   .1293042E-01   .1501961E-01   .1655984E-01   .1731203E-01   .1733963E-01
   .1686196E-01   .1623332E-01   .1586961E-01   .1607457E-01   .1690972E-01
   .1816052E-01   .1942789E-01   .2031289E-01   .2063040E-01   .2049951E-01
   .2028124E-01   .2033850E-01   .2089237E-01   .2184424E-01   .2277509E-01
   .2325611E-01   .2304241E-01   .2217058E-01   .2096200E-01   .1987194E-01
   .1930661E-01   .1947875E-01   .2021766E-01   .2103592E-01   .2146090E-01
   .2126127E-01   .2055063E-01   .1965425E-01   .1882902E-01   .1810365E-01
   .1731633E-01   .1631716E-01   .1505519E-01   .1364813E-01   .1233815E-01
   .1138274E-01   .1097905E-01   .1113612E-01   .1158102E-01   .1190584E-01
   .1181257E-01   .1122019E-01   .1028154E-01   .9304844E-02   .8555886E-02
   .8155244E-02   .8051931E-02   .8076176E-02   .8075574E-02   .8028519E-02
   .8071527E-02   .8454460E-02   .9328984E-02   .1061516E-01   .1205929E-01
   .1344581E-01   .1473307E-01   .1595855E-01   .1710524E-01   .1812305E-01
   .1896507E-01   .1969093E-01   .2043951E-01   .2128477E-01   .2220900E-01
   .2311280E-01   .2384061E-01   .2415720E-01   .2383194E-01   .2278384E-01
   .2115645E-01   .1924768E-01   .1728240E-01   .1533099E-01   .1333535E-01
   .1113582E-01   .8600495E-02   .5763565E-02   .2858477E-02   .1916079E-03
  -.2068025E-02  -.3876228E-02  -.5144290E-02  -.5727403E-02  -.5584580E-02
  -.4854962E-02  -.3826749E-02  -.2795060E-02  -.1930450E-02  -.1250331E-02
  -.6640047E-03  -.6774071E-04   .5641767E-03   .1193554E-02   .1759286E-02
   .2145150E-02   .2219257E-02   .1933517E-02   .1327136E-02   .5367098E-03
  -.2073698E-03  -.7091745E-03  -.9722952E-03  -.1187434E-02  -.1589157E-02
  -.2256074E-02  -.2990329E-02  -.3379887E-02  -.3054537E-02  -.1873864E-02
   .4318712E-04   .2288592E-02   .4343455E-02   .5858857E-02   .6808135E-02
   .7387711E-02   .7887475E-02   .8601487E-02   .9632260E-02   .1084214E-01
   .1197663E-01   .1280049E-01   .1317222E-01   .1311030E-01   .1277037E-01
   .1236785E-01   .1210652E-01   .1204922E-01   .1204018E-01   .1176262E-01
   .1094389E-01   .9425989E-02   .7255673E-02   .4804444E-02   .2571453E-02
   .8997119E-03  -.2479314E-03  -.1211397E-02  -.2282714E-02  -.3551051E-02
  -.4969709E-02  -.6382377E-02  -.7587066E-02  -.8440717E-02  -.8865214E-02
  -.8873925E-02  -.8596330E-02  -.8205041E-02  -.7827809E-02  -.7502994E-02
  -.7199671E-02  -.6874337E-02  -.6517463E-02  -.6108679E-02  -.5619990E-02
  -.5042439E-02  -.4344489E-02  -.3558241E-02  -.2751368E-02  -.2000494E-02
  -.1408115E-02  -.1066246E-02  -.1024142E-02  -.1220659E-02  -.1492523E-02
  -.1697446E-02  -.1769594E-02  -.1618458E-02  -.1165441E-02  -.4662413E-03
   .3116083E-03   .9965025E-03   .1491913E-02   .1753027E-02   .1793564E-02
   .1644305E-02   .1298708E-02   .7380800E-03  -.5640481E-04  -.1127390E-02
  -.2503753E-02  -.4113855E-02  -.5799379E-02  -.7378412E-02  -.8674996E-02
  -.9591018E-02  -.1018493E-01  -.1061509E-01  -.1105415E-01  -.1162567E-01
  -.1235135E-01  -.1315087E-01  -.1384328E-01  -.1423249E-01  -.1419565E-01
  -.1371223E-01  -.1287064E-01  -.1191273E-01  -.1111772E-01  -.1066019E-01
  -.1049184E-01  -.1037199E-01  -.1003081E-01  -.9312365E-02  -.8317558E-02
  -.7330827E-02  -.6670231E-02  -.6495431E-02  -.6725566E-02  -.7163535E-02
  -.7555014E-02  -.7665564E-02  -.7377150E-02  -.6748818E-02  -.6040852E-02
  -.5670656E-02  -.5935013E-02  -.6744671E-02  -.7707685E-02  -.8374851E-02
  -.8423860E-02  -.7871098E-02  -.6982875E-02  -.6105908E-02  -.5548342E-02
  -.5420911E-02  -.5638732E-02  -.5977299E-02  -.6131179E-02  -.5886472E-02
  -.5223908E-02  -.4290445E-02  -.3311896E-02  -.2472400E-02  -.1897384E-02
  -.1639224E-02  -.1588625E-02  -.1544225E-02  -.1335432E-02  -.8385688E-03
   .6118913E-04   .1385690E-02   .2964432E-02   .4434016E-02   .5451128E-02
   .5872149E-02   .5725408E-02   .5136375E-02   .4273988E-02   .3348181E-02
   .2496257E-02   .1758902E-02   .1115204E-02   .5515254E-03   .4889718E-04
  -.4104806E-03  -.8697334E-03  -.1329076E-02  -.1627870E-02  -.1616423E-02
  -.1288849E-02  -.7203351E-03  -.4322821E-04   .5934088E-03   .1028030E-02
   .1159860E-02   .1012330E-02   .6264646E-03  -.1793901E-04  -.1002609E-02
  -.2375119E-02  -.4089000E-02  -.6064127E-02  -.8200133E-02  -.1035430E-01
  -.1240511E-01  -.1430712E-01  -.1597319E-01  -.1729239E-01  -.1826020E-01
  -.1902469E-01  -.1980690E-01  -.2070497E-01  -.2166819E-01  -.2256450E-01
  -.2326104E-01  -.2368419E-01  -.2388439E-01  -.2399865E-01  -.2415685E-01
  -.2441747E-01  -.2476513E-01  -.2512424E-01  -.2534748E-01  -.2532517E-01
  -.2493724E-01  -.2402177E-01  -.2250070E-01  -.2047344E-01  -.1817365E-01
  -.1592424E-01  -.1407766E-01  -.1283603E-01  -.1214633E-01  -.1175053E-01
  -.1136368E-01  -.1077395E-01  -.9899016E-02  -.8828750E-02  -.7754508E-02
  -.6905755E-02  -.6500982E-02  -.6550839E-02  -.6740626E-02  -.6598644E-02
  -.5813681E-02  -.4414832E-02  -.2664003E-02  -.8418647E-03   .8727569E-03
   .2434076E-02   .3884897E-02   .5321522E-02   .6848431E-02   .8496099E-02
   .1015116E-01   .1162587E-01   .1275352E-01   .1346556E-01   .1375544E-01
   .1355800E-01   .1276672E-01   .1134622E-01   .9454649E-02   .7496493E-02
   .5994601E-02   .5278560E-02   .5351777E-02   .6004074E-02   .7129106E-02
   .8788597E-02   .1095467E-01   .1340916E-01   .1591289E-01   .1833014E-01
   .2053866E-01   .2235765E-01   .2366186E-01   .2445168E-01   .2482586E-01
   .2481698E-01   .2432883E-01   .2328220E-01   .2180951E-01   .2017039E-01
   .1857455E-01   .1701637E-01   .1520805E-01   .1280735E-01   .9595160E-02
   .5658139E-02   .1423829E-02  -.2578851E-02  -.6086917E-02  -.9232599E-02
  -.1225418E-01  -.1523520E-01  -.1811809E-01  -.2079658E-01  -.2309102E-01
  -.2480675E-01  -.2585133E-01  -.2624528E-01  -.2606891E-01  -.2543997E-01
  -.2447347E-01  -.2331043E-01  -.2216000E-01  -.2121894E-01  -.2060638E-01
  -.2030853E-01  -.2019051E-01  -.2014986E-01  -.2019354E-01  -.2038886E-01
  -.2079579E-01  -.2137903E-01  -.2195666E-01  -.2236463E-01  -.2248806E-01
  -.2220628E-01  -.2142702E-01  -.2010986E-01  -.1829514E-01  -.1616327E-01
  -.1395864E-01  -.1191317E-01  -.1020966E-01  -.8851134E-02  -.7601031E-02
  -.6069185E-02  -.3966298E-02  -.1358553E-02   .1366250E-02   .3687079E-02
   .5125263E-02   .5401678E-02   .4547470E-02   .2848161E-02   .7208668E-03
  -.1431717E-02  -.3366703E-02  -.4981319E-02  -.6325882E-02  -.7564129E-02
  -.8737557E-02  -.9671953E-02  -.1001239E-01  -.9396490E-02  -.7695630E-02
  -.5077650E-02  -.1917017E-02   .1373279E-02   .4476923E-02   .7221886E-02
   .9615880E-02   .1175102E-01   .1378877E-01   .1589196E-01   .1809672E-01
   .2028285E-01   .2213351E-01   .2325729E-01   .2346834E-01   .2288612E-01
   .2187494E-01   .2081230E-01   .1993617E-01   .1925609E-01   .1862360E-01
   .1785515E-01   .1684655E-01   .1569491E-01   .1466394E-01   .1409593E-01
   .1427692E-01   .1526779E-01   .1683091E-01   .1857276E-01   .2017941E-01
   .2149358E-01   .2247617E-01   .2315956E-01   .2359890E-01   .2388463E-01
   .2412150E-01   .2428184E-01   .2422959E-01   .2379888E-01   .2289828E-01
   .2156204E-01   .1989470E-01   .1803321E-01   .1610163E-01   .1417613E-01
   .1225008E-01   .1026927E-01   .8243025E-02   .6397564E-02   .5099461E-02
   .4571525E-02   .4720904E-02   .5324401E-02   .6246681E-02   .7396168E-02
   .8606678E-02   .9703117E-02   .1062914E-01   .1142676E-01   .1214058E-01
   .1272154E-01   .1299789E-01   .1275976E-01   .1189004E-01   .1041120E-01
   .8433203E-02   .6181012E-02   .3962860E-02   .2025591E-02   .4298253E-03
  -.9096573E-03  -.2061352E-02  -.3038159E-02  -.3912425E-02  -.4811711E-02
  -.5897745E-02  -.7295182E-02  -.8972006E-02  -.1074913E-01  -.1244555E-01
  -.1399832E-01  -.1541474E-01  -.1678284E-01  -.1822468E-01  -.1986641E-01
  -.2179402E-01  -.2395399E-01  -.2615787E-01  -.2819810E-01  -.2992524E-01
  -.3128951E-01  -.3230474E-01  -.3304382E-01  -.3359354E-01  -.3394128E-01
  -.3399590E-01  -.3357214E-01  -.3244797E-01  -.3050620E-01  -.2778026E-01
  -.2446579E-01  -.2087689E-01  -.1740779E-01  -.1439104E-01  -.1202067E-01
  -.1028105E-01  -.8958929E-02  -.7771676E-02  -.6493290E-02  -.5102406E-02
  -.3769815E-02  -.2713268E-02  -.2068493E-02  -.1814808E-02  -.1755958E-02
  -.1632777E-02  -.1296306E-02  -.8076758E-03  -.3897392E-03  -.2775091E-03
  -.6893339E-03  -.1750007E-02  -.3454120E-02  -.5666040E-02  -.8102819E-02
  -.1040920E-01  -.1231520E-01  -.1384673E-01  -.1528742E-01  -.1693568E-01
  -.1893135E-01  -.2115254E-01  -.2330393E-01  -.2507338E-01  -.2624603E-01
  -.2678687E-01  -.2683263E-01  -.2666691E-01  -.2659092E-01  -.2674554E-01
  -.2704035E-01  -.2722048E-01  -.2696042E-01  -.2603000E-01  -.2446873E-01
  -.2260781E-01  -.2090981E-01  -.1977746E-01  -.1938767E-01  -.1965307E-01
  -.2028762E-01  -.2097004E-01  -.2152625E-01  -.2200024E-01  -.2257222E-01
  -.2347796E-01  -.2486953E-01  -.2668612E-01  -.2868862E-01  -.3056288E-01
  -.3197613E-01  -.3273496E-01  -.3290188E-01  -.3270577E-01  -.3246344E-01
  -.3247324E-01  -.3282808E-01  -.3340680E-01  -.3399086E-01  -.3433719E-01
  -.3436714E-01  -.3424806E-01  -.3420495E-01  -.3427968E-01  -.3436978E-01
  -.3429586E-01  -.3382685E-01  -.3277200E-01  -.3093330E-01  -.2811781E-01
  -.2425018E-01  -.1944027E-01  -.1401825E-01  -.8447048E-02  -.3145753E-02
   .1572857E-02   .5499693E-02   .8596366E-02   .1100223E-01   .1288138E-01
   .1432189E-01   .1535798E-01   .1602133E-01   .1639593E-01   .1662176E-01
   .1680874E-01   .1705938E-01   .1751872E-01   .1828189E-01   .1937849E-01
   .2077015E-01   .2236425E-01   .2400468E-01   .2548744E-01   .2656246E-01
   .2699444E-01   .2671979E-01   .2593294E-01   .2495421E-01   .2401819E-01
   .2319340E-01   .2240810E-01   .2151003E-01   .2042916E-01   .1918248E-01
   .1780147E-01   .1636782E-01   .1493446E-01   .1343313E-01   .1170608E-01
   .9646765E-02   .7291436E-02   .4704567E-02   .1849598E-02  -.1325388E-02
  -.4708760E-02  -.8012790E-02  -.1087892E-01  -.1304082E-01  -.1449434E-01
  -.1544422E-01  -.1611747E-01  -.1667402E-01  -.1715818E-01  -.1745835E-01
  -.1736335E-01  -.1672939E-01  -.1562264E-01  -.1422663E-01  -.1272613E-01
  -.1129378E-01  -.1007308E-01  -.9087925E-02  -.8187985E-02  -.7118304E-02
  -.5643536E-02  -.3676957E-02  -.1294392E-02   .1299139E-02   .3777362E-02
   .5788451E-02   .7121683E-02   .7853995E-02   .8237334E-02   .8477794E-02
   .8709525E-02   .9030625E-02   .9444808E-02   .9857419E-02   .1014848E-01
   .1023786E-01   .1007981E-01   .9671653E-02   .9063911E-02   .8236002E-02
   .7139378E-02   .5823155E-02   .4478360E-02   .3359903E-02   .2694225E-02
   .2491334E-02   .2517421E-02   .2525212E-02   .2408061E-02   .2217658E-02
   .2144211E-02   .2457480E-02   .3345770E-02   .4799776E-02   .6618056E-02
   .8438938E-02   .9871425E-02   .1068408E-01   .1092462E-01   .1094798E-01
   .1119495E-01   .1183623E-01   .1264373E-01   .1318880E-01   .1312915E-01
   .1236881E-01   .1108518E-01   .9721700E-02   .8807472E-02   .8705218E-02
   .9485243E-02   .1090938E-01   .1251236E-01   .1386218E-01   .1480247E-01
   .1536763E-01   .1561532E-01   .1561099E-01   .1538790E-01   .1494998E-01
   .1429054E-01   .1340410E-01   .1223831E-01   .1071734E-01   .8820067E-02
   .6670588E-02   .4544744E-02   .2753659E-02   .1427918E-02   .4964514E-03
  -.2178335E-03  -.8691620E-03  -.1494417E-02  -.2054121E-02  -.2438051E-02
  -.2522748E-02  -.2306033E-02  -.1934062E-02  -.1626722E-02  -.1564475E-02
  -.1833029E-02  -.2404681E-02  -.3143632E-02  -.3924127E-02  -.4659626E-02
  -.5348609E-02  -.6087455E-02  -.7004596E-02  -.8198394E-02  -.9697628E-02
  -.1143874E-01  -.1328500E-01  -.1502836E-01  -.1643648E-01  -.1738091E-01
  -.1786930E-01  -.1798958E-01  -.1783716E-01  -.1741821E-01  -.1670131E-01
  -.1576284E-01  -.1472864E-01  -.1369137E-01  -.1269509E-01  -.1173508E-01
  -.1082223E-01  -.9966020E-02  -.9109187E-02  -.8159510E-02  -.7070681E-02
  -.5885593E-02  -.4668828E-02  -.3405909E-02  -.2066813E-02  -.6974624E-03
   .5206509E-03   .1387489E-02   .1802987E-02   .1761137E-02   .1388153E-02
   .8272145E-03   .1103055E-03  -.7272390E-03  -.1565444E-02  -.2319121E-02
  -.2948207E-02  -.3463930E-02  -.3945081E-02  -.4496688E-02  -.5224527E-02
  -.6122413E-02  -.7051183E-02  -.7858166E-02  -.8488493E-02  -.8937168E-02
  -.9187883E-02  -.9289897E-02  -.9314616E-02  -.9262049E-02  -.9013482E-02
  -.8396212E-02  -.7268765E-02  -.5630367E-02  -.3662512E-02  -.1714759E-02
  -.1205619E-03   .1040437E-02   .1886182E-02   .2530504E-02   .3065978E-02
   .3583745E-02   .4075729E-02   .4406147E-02   .4394448E-02   .3891031E-02
   .2888199E-02   .1483437E-02  -.1865363E-03  -.1871795E-02  -.3277344E-02
  -.4219540E-02  -.4666834E-02  -.4698034E-02  -.4449956E-02  -.4101343E-02
  -.3798376E-02  -.3590616E-02  -.3411027E-02  -.3118169E-02  -.2606819E-02
  -.1965498E-02  -.1449587E-02  -.1272654E-02  -.1469220E-02  -.1835971E-02
  -.2085451E-02  -.2068202E-02  -.1738915E-02  -.1153934E-02  -.5280814E-03
  -.1707102E-03  -.2928564E-03  -.8459607E-03  -.1642896E-02  -.2518049E-02
  -.3332578E-02  -.4032785E-02  -.4726056E-02  -.5541197E-02  -.6557911E-02
  -.7788608E-02  -.9184539E-02  -.1068867E-01  -.1222725E-01  -.1364802E-01
  -.1481282E-01  -.1575193E-01  -.1662852E-01  -.1761049E-01  -.1879178E-01
  -.2018945E-01  -.2174824E-01  -.2337314E-01  -.2499977E-01  -.2655428E-01
  -.2783433E-01  -.2858334E-01  -.2867754E-01  -.2815687E-01  -.2712700E-01
  -.2573273E-01  -.2419876E-01  -.2268019E-01  -.2121461E-01  -.1976369E-01
  -.1827688E-01  -.1673571E-01  -.1514291E-01  -.1353011E-01  -.1197557E-01
  -.1057923E-01  -.9478533E-02  -.8799695E-02  -.8497086E-02  -.8333766E-02
  -.8036258E-02  -.7449823E-02  -.6566151E-02  -.5500221E-02  -.4407977E-02
  -.3442317E-02  -.2790345E-02  -.2634141E-02  -.3101821E-02  -.4211412E-02
  -.5827908E-02  -.7696935E-02  -.9604172E-02  -.1148775E-01  -.1337963E-01
  -.1532937E-01  -.1739405E-01  -.1956476E-01  -.2168584E-01  -.2350877E-01
  -.2488485E-01  -.2586830E-01  -.2660785E-01  -.2729801E-01  -.2815287E-01
  -.2930167E-01  -.3074342E-01  -.3237511E-01  -.3404294E-01  -.3562822E-01
  -.3705252E-01  -.3831343E-01  -.3950581E-01  -.4068862E-01  -.4184037E-01
  -.4290695E-01  -.4380054E-01  -.4435129E-01  -.4442440E-01  -.4399431E-01
  -.4310161E-01  -.4178776E-01  -.4016320E-01  -.3842914E-01  -.3672772E-01
  -.3505614E-01  -.3327961E-01  -.3124145E-01  -.2883294E-01  -.2606751E-01
  -.2313149E-01  -.2028966E-01  -.1771488E-01  -.1547067E-01  -.1358921E-01
  -.1205302E-01  -.1069386E-01  -.9241300E-02  -.7482506E-02  -.5325315E-02
  -.2788890E-02  -.3666504E-04   .2653572E-02   .5074100E-02   .7278498E-02
   .9592005E-02   .1236525E-01   .1569170E-01   .1936085E-01   .2302265E-01
   .2643102E-01   .2949129E-01   .3207594E-01   .3394890E-01   .3493579E-01
   .3510992E-01   .3474385E-01   .3400631E-01   .3271413E-01   .3053152E-01
   .2723914E-01   .2277055E-01   .1718621E-01   .1086496E-01   .4554551E-02
  -.1017078E-02  -.5603935E-02  -.9543341E-02  -.1334420E-01  -.1719528E-01
  -.2086818E-01  -.2400185E-01  -.2642339E-01  -.2817543E-01  -.2938118E-01
  -.3019964E-01  -.3080632E-01  -.3138818E-01  -.3207349E-01  -.3288211E-01
  -.3378043E-01  -.3472929E-01  -.3570382E-01  -.3668623E-01  -.3769015E-01
  -.3875347E-01  -.3988050E-01  -.4099473E-01  -.4199772E-01  -.4282035E-01
  -.4343130E-01  -.4381550E-01  -.4394945E-01  -.4382325E-01  -.4341866E-01
  -.4271426E-01  -.4172894E-01  -.4048119E-01  -.3892970E-01  -.3700953E-01
  -.3464435E-01  -.3181966E-01  -.2862859E-01  -.2516723E-01  -.2152643E-01
  -.1780057E-01  -.1402116E-01  -.1014106E-01  -.6105194E-02  -.1993511E-02
   .1900274E-02   .5235172E-02   .7849956E-02   .9829051E-02   .1139959E-01
   .1281883E-01   .1431308E-01   .1598589E-01   .1781397E-01   .1964129E-01
   .2120951E-01   .2236442E-01   .2318135E-01   .2385233E-01   .2449339E-01
   .2514127E-01   .2584075E-01   .2669125E-01   .2777324E-01   .2899654E-01
   .3012170E-01   .3089180E-01   .3112292E-01   .3076921E-01   .2990096E-01
   .2866250E-01   .2714308E-01   .2532303E-01   .2316649E-01   .2063821E-01
   .1774614E-01   .1469455E-01   .1187432E-01   .9548200E-02   .7661845E-02
   .5962985E-02   .4244135E-02   .2463540E-02   .6908136E-03  -.9981272E-03
  -.2548726E-02  -.3901316E-02  -.5014564E-02  -.5973338E-02  -.6987345E-02
  -.8298014E-02  -.9998081E-02  -.1199265E-01  -.1413817E-01  -.1629746E-01
  -.1838705E-01  -.2046659E-01  -.2262949E-01  -.2488756E-01  -.2716404E-01
  -.2937878E-01  -.3147594E-01  -.3335249E-01  -.3489053E-01  -.3604658E-01
  -.3694968E-01  -.3782624E-01  -.3880158E-01  -.3980660E-01  -.4066305E-01
  -.4114390E-01  -.4107141E-01  -.4035935E-01  -.3899643E-01  -.3708549E-01
  -.3470731E-01  -.3193769E-01  -.2888406E-01  -.2561235E-01  -.2216560E-01
  -.1865919E-01  -.1533546E-01  -.1248823E-01  -.1034414E-01  -.8985599E-02
  -.8281079E-02  -.7999937E-02  -.7893572E-02  -.7828847E-02  -.7743317E-02
  -.7614102E-02  -.7478631E-02  -.7321918E-02  -.7066349E-02  -.6609859E-02
  -.5878070E-02  -.4891834E-02  -.3764985E-02  -.2700227E-02  -.1928996E-02
  -.1615377E-02  -.1730597E-02  -.2054372E-02  -.2414835E-02  -.2739031E-02
  -.3026006E-02  -.3348830E-02  -.3809631E-02  -.4484948E-02  -.5400918E-02
  -.6570719E-02  -.7985512E-02  -.9609280E-02  -.1131956E-01  -.1292343E-01
  -.1418853E-01  -.1488358E-01  -.1482413E-01  -.1388782E-01  -.1212976E-01
  -.9834923E-02  -.7402472E-02  -.5090874E-02  -.2898119E-02  -.6499109E-03
   .1836921E-02   .4615332E-02   .7670729E-02   .1085530E-01   .1385012E-01
   .1630506E-01   .1800843E-01   .1898165E-01   .1940858E-01   .1957927E-01
   .1976570E-01   .2012636E-01   .2070478E-01   .2145082E-01   .2226516E-01
   .2309144E-01   .2394328E-01   .2488335E-01   .2597864E-01   .2721752E-01
   .2853857E-01   .3000275E-01   .3171441E-01   .3362898E-01   .3555383E-01
   .3730523E-01   .3879798E-01   .4004070E-01   .4110729E-01   .4209881E-01
   .4310135E-01   .4413036E-01   .4515105E-01   .4612567E-01   .4701808E-01
   .4772785E-01   .4810002E-01   .4802156E-01   .4743645E-01   .4628114E-01
   .4456710E-01   .4240521E-01   .3990928E-01   .3707969E-01   .3384341E-01
   .3014667E-01   .2595280E-01   .2118838E-01   .1587413E-01   .1037784E-01
   .5319315E-02   .1029822E-02  -.2714885E-02  -.6389800E-02  -.1023415E-01
  -.1405748E-01  -.1749288E-01  -.2027940E-01  -.2237126E-01  -.2387520E-01
  -.2497491E-01  -.2587443E-01  -.2672191E-01  -.2758201E-01  -.2842079E-01
  -.2912132E-01  -.2955093E-01  -.2960975E-01  -.2928318E-01  -.2870263E-01
  -.2807013E-01  -.2752350E-01  -.2705642E-01  -.2656725E-01  -.2593037E-01
  -.2500854E-01  -.2375435E-01  -.2224840E-01  -.2059392E-01  -.1887352E-01
  -.1707813E-01  -.1513690E-01  -.1300494E-01  -.1068970E-01  -.8237491E-02
  -.5678603E-02  -.3024703E-02  -.2931543E-03   .2468339E-02   .5100282E-02
   .7418395E-02   .9407857E-02   .1120554E-01   .1298181E-01   .1485854E-01
   .1689113E-01   .1898377E-01   .2090180E-01   .2240934E-01   .2339259E-01
   .2396615E-01   .2441295E-01   .2502405E-01   .2599658E-01   .2735519E-01
   .2893326E-01   .3044403E-01   .3163979E-01   .3246402E-01   .3307486E-01
   .3376904E-01   .3482522E-01   .3638251E-01   .3827094E-01   .4007500E-01
   .4140203E-01   .4208250E-01   .4219052E-01   .4196934E-01   .4167751E-01
   .4141946E-01   .4106947E-01   .4037176E-01   .3905759E-01   .3693264E-01
   .3400152E-01   .3050051E-01   .2681562E-01   .2329082E-01   .2006647E-01
   .1712504E-01   .1446647E-01   .1219057E-01   .1036316E-01   .8882794E-02
   .7611004E-02   .6500876E-02   .5579791E-02   .4884939E-02   .4348514E-02
   .3821399E-02   .3257776E-02   .2735661E-02   .2325513E-02   .1964373E-02
   .1471633E-02   .7230196E-03  -.2237661E-03  -.1183435E-02  -.2032064E-02
  -.2732255E-02  -.3259944E-02  -.3589556E-02  -.3736314E-02  -.3741723E-02
  -.3627213E-02  -.3332193E-02  -.2747593E-02  -.1799371E-02  -.4614319E-03
   .1313936E-02   .3597257E-02   .6381407E-02   .9660176E-02   .1342368E-01
   .1746504E-01   .2145024E-01   .2519870E-01   .2880570E-01   .3244766E-01
   .3612795E-01   .3965914E-01   .4281320E-01   .4549538E-01   .4770393E-01
   .4942877E-01   .5059118E-01   .5109119E-01   .5089431E-01   .5004720E-01
   .4872271E-01   .4707232E-01   .4515445E-01   .4298792E-01   .4059903E-01
   .3808523E-01   .3555292E-01   .3298022E-01   .3024485E-01   .2728266E-01
   .2411012E-01   .2072310E-01   .1709904E-01   .1327799E-01   .9417365E-02
   .5654537E-02   .1933639E-02  -.1982714E-02  -.6273689E-02  -.1083771E-01
  -.1534522E-01  -.1946925E-01  -.2305402E-01  -.2612922E-01  -.2873059E-01
  -.3075491E-01  -.3202012E-01  -.3239666E-01  -.3187582E-01  -.3059773E-01
  -.2876615E-01  -.2654910E-01  -.2399383E-01  -.2104913E-01  -.1770125E-01
  -.1407086E-01  -.1037020E-01  -.6865394E-02  -.3780863E-02  -.1187703E-02
   .1014114E-02   .3016015E-02   .5017650E-02   .7249140E-02   .9847955E-02
   .1275189E-01   .1569375E-01   .1829298E-01   .2029655E-01   .2182216E-01
   .2328464E-01   .2503639E-01   .2716853E-01   .2949289E-01   .3171124E-01
   .3356018E-01   .3486822E-01   .3559372E-01   .3587588E-01   .3594311E-01
   .3597360E-01   .3599161E-01   .3585429E-01   .3537946E-01   .3441375E-01
   .3293612E-01   .3116345E-01   .2939941E-01   .2784150E-01   .2649737E-01
   .2527848E-01   .2408119E-01   .2279550E-01   .2140240E-01   .2000398E-01
   .1878610E-01   .1793933E-01   .1753016E-01   .1752957E-01   .1782218E-01
   .1829948E-01   .1889522E-01   .1953053E-01   .2009672E-01   .2048127E-01
   .2059761E-01   .2041962E-01   .1993541E-01   .1904955E-01   .1756346E-01
   .1523526E-01   .1201414E-01   .8193549E-02   .4254953E-02   .5597407E-03
  -.2800789E-02  -.5782410E-02  -.8205857E-02  -.9834980E-02  -.1051828E-01
  -.1031233E-01  -.9353424E-02  -.7718899E-02  -.5441741E-02  -.2584212E-02
   .6743276E-03   .4031855E-02   .7162447E-02   .9818572E-02   .1186377E-01
   .1324684E-01   .1402385E-01   .1435577E-01   .1445836E-01   .1449115E-01
   .1452075E-01   .1443697E-01   .1400372E-01   .1302098E-01   .1144981E-01
   .9475476E-02   .7362644E-02   .5318824E-02   .3484957E-02   .1889377E-02
   .4811613E-03  -.7743045E-03  -.1865642E-02  -.2772508E-02  -.3489093E-02
  -.3951529E-02  -.4035601E-02  -.3693217E-02  -.3037333E-02  -.2290614E-02
  -.1628903E-02  -.1121677E-02  -.7122593E-03  -.2536884E-03   .3815443E-03
   .1256093E-02   .2312937E-02   .3416037E-02   .4416685E-02   .5214011E-02
   .5799901E-02   .6264163E-02   .6761130E-02   .7453588E-02   .8448809E-02
   .9726593E-02   .1109791E-01   .1233529E-01   .1324645E-01   .1365708E-01
   .1343346E-01   .1253341E-01   .1104653E-01   .9081741E-02   .6668755E-02
   .3794800E-02   .5288879E-03  -.2933672E-02  -.6370369E-02  -.9618324E-02
  -.1258943E-01  -.1524913E-01  -.1755011E-01  -.1952278E-01  -.2131174E-01
  -.2298710E-01  -.2454352E-01  -.2596571E-01  -.2724107E-01  -.2838509E-01
  -.2940309E-01  -.3034610E-01  -.3130158E-01  -.3234925E-01  -.3347019E-01
  -.3454704E-01  -.3546522E-01  -.3614245E-01  -.3658459E-01  -.3690478E-01
  -.3721348E-01  -.3756305E-01  -.3791804E-01  -.3824055E-01  -.3850319E-01
  -.3871716E-01  -.3896874E-01  -.3931397E-01  -.3967918E-01  -.3984231E-01
  -.3958525E-01  -.3883817E-01  -.3760528E-01  -.3584482E-01  -.3351093E-01
  -.3058273E-01  -.2703513E-01  -.2287824E-01  -.1818877E-01  -.1314804E-01
  -.8013727E-02  -.2989739E-02   .1836772E-02   .6411845E-02   .1061929E-01
   .1425664E-01   .1711338E-01   .1908012E-01   .2026807E-01   .2095256E-01
   .2137589E-01   .2161487E-01   .2162427E-01   .2136082E-01   .2084311E-01
   .2017961E-01   .1953551E-01   .1904061E-01   .1872321E-01   .1854318E-01
   .1836439E-01   .1799226E-01   .1723889E-01   .1605596E-01   .1464182E-01
   .1343543E-01   .1282651E-01   .1283325E-01   .1317267E-01   .1351978E-01
   .1369680E-01   .1375249E-01   .1387530E-01   .1421378E-01   .1487677E-01
   .1583738E-01   .1679053E-01   .1738658E-01   .1749255E-01   .1718521E-01
   .1668444E-01   .1621590E-01   .1594970E-01   .1603375E-01   .1656994E-01
   .1758889E-01   .1904070E-01   .2079441E-01   .2267062E-01   .2451229E-01
   .2619757E-01   .2760700E-01   .2870456E-01   .2948539E-01   .2983748E-01
   .2954612E-01   .2840140E-01   .2631132E-01   .2337992E-01   .1979010E-01
   .1569410E-01   .1134838E-01   .7184786E-02   .3593326E-02   .6281771E-03
  -.1991229E-02  -.4586177E-02  -.7236442E-02  -.9744161E-02  -.1182662E-01
  -.1333820E-01  -.1436941E-01  -.1523148E-01  -.1622212E-01  -.1739774E-01
  -.1859731E-01  -.1958094E-01  -.2021481E-01  -.2055966E-01  -.2081551E-01
  -.2116052E-01  -.2164459E-01  -.2217756E-01  -.2252211E-01  -.2229121E-01
  -.2108143E-01  -.1865616E-01  -.1505591E-01  -.1054554E-01  -.5516494E-02
  -.3471896E-03   .4758959E-02   .9773779E-02   .1466336E-01   .1926641E-01
   .2342940E-01   .2712127E-01   .3039481E-01   .3312803E-01   .3505799E-01
   .3615592E-01   .3668949E-01   .3701541E-01   .3734190E-01   .3761921E-01
   .3770822E-01   .3746503E-01   .3681795E-01   .3582878E-01   .3459222E-01
   .3315535E-01   .3150796E-01   .2960816E-01   .2743577E-01   .2503732E-01
   .2255822E-01   .2023243E-01   .1827155E-01   .1683118E-01   .1606123E-01
   .1595764E-01   .1629854E-01   .1676659E-01   .1716286E-01   .1749874E-01
   .1785177E-01   .1829009E-01   .1881433E-01   .1927126E-01   .1933190E-01
   .1861483E-01   .1680963E-01   .1376301E-01   .9636826E-02   .4927953E-02
   .2635815E-03  -.3929448E-02  -.7648987E-02  -.1117705E-01  -.1477876E-01
  -.1856046E-01  -.2245539E-01  -.2627806E-01  -.2977619E-01  -.3276145E-01
  -.3517687E-01  -.3707400E-01  -.3867915E-01  -.4027752E-01  -.4196179E-01
  -.4362510E-01  -.4506341E-01  -.4606494E-01  -.4645804E-01  -.4615610E-01
  -.4520198E-01  -.4375370E-01  -.4203990E-01  -.4029374E-01  -.3865928E-01
  -.3715609E-01  -.3572762E-01  -.3435517E-01  -.3307069E-01  -.3197700E-01
  -.3115569E-01  -.3060866E-01  -.3033292E-01  -.3034463E-01  -.3064176E-01
  -.3110803E-01  -.3161244E-01  -.3207784E-01  -.3238640E-01  -.3234700E-01
  -.3171942E-01  -.3030297E-01  -.2804795E-01  -.2507422E-01  -.2162494E-01
  -.1799374E-01  -.1434494E-01  -.1060248E-01  -.6517559E-02  -.1818321E-02
   .3581573E-02   .9478218E-02   .1540112E-01   .2088321E-01   .2575475E-01
   .3026213E-01   .3475953E-01   .3928248E-01   .4356263E-01   .4738637E-01
   .5080685E-01   .5399541E-01   .5699578E-01   .5963982E-01   .6172619E-01
   .6319326E-01   .6409749E-01   .6456191E-01   .6469537E-01   .6453258E-01
   .6403766E-01   .6311040E-01   .6163994E-01   .5958884E-01   .5699703E-01
   .5395961E-01   .5061851E-01   .4712573E-01   .4363782E-01   .4031419E-01
   .3730057E-01   .3471031E-01   .3260072E-01   .3098306E-01   .2981991E-01
   .2910471E-01   .2890089E-01   .2920981E-01   .2995780E-01   .3098902E-01
   .3207876E-01   .3305437E-01   .3382505E-01   .3432396E-01   .3448578E-01
   .3425265E-01   .3368563E-01   .3300135E-01   .3248643E-01   .3232293E-01
   .3250481E-01   .3287883E-01   .3327389E-01   .3357466E-01   .3366598E-01
   .3351570E-01   .3322043E-01   .3296768E-01   .3292329E-01   .3308374E-01
   .3325559E-01   .3322485E-01   .3288749E-01   .3223990E-01   .3136868E-01
   .3052081E-01   .3004423E-01   .3016734E-01   .3091231E-01   .3213511E-01
   .3359551E-01   .3500908E-01   .3616651E-01   .3703229E-01   .3772033E-01
   .3846190E-01   .3948680E-01   .4082657E-01   .4235341E-01   .4386619E-01
   .4512002E-01   .4594405E-01   .4630683E-01   .4628628E-01   .4600447E-01
   .4557710E-01   .4510034E-01   .4459775E-01   .4400302E-01   .4321134E-01
   .4210245E-01   .4066826E-01   .3901998E-01   .3729293E-01   .3560814E-01
   .3403775E-01   .3264325E-01   .3143860E-01   .3034878E-01   .2928341E-01
   .2816980E-01   .2696341E-01   .2565867E-01   .2421850E-01   .2256612E-01
   .2068402E-01   .1866814E-01   .1661008E-01   .1450471E-01   .1232123E-01
   .9935719E-02   .7137116E-02   .3834772E-02   .2532780E-03  -.3154582E-02
  -.6017227E-02  -.8250175E-02  -.1000594E-01  -.1148399E-01  -.1281362E-01
  -.1408961E-01  -.1545144E-01  -.1701325E-01  -.1873082E-01  -.2046454E-01
  -.2207243E-01  -.2341844E-01  -.2450234E-01  -.2543553E-01  -.2634971E-01
  -.2736482E-01  -.2858250E-01  -.3006142E-01  -.3178779E-01  -.3368618E-01
  -.3559776E-01  -.3734858E-01  -.3881080E-01  -.3998543E-01  -.4100822E-01
  -.4203534E-01  -.4315894E-01  -.4432819E-01  -.4534135E-01  -.4596513E-01
  -.4602930E-01  -.4550697E-01  -.4452826E-01  -.4323965E-01  -.4169950E-01
  -.3987081E-01  -.3768826E-01  -.3519239E-01  -.3251664E-01  -.2974134E-01
  -.2692611E-01  -.2414687E-01  -.2148474E-01  -.1897649E-01  -.1654484E-01
  -.1413243E-01  -.1171924E-01  -.9293397E-02  -.6881548E-02  -.4515450E-02
  -.2264284E-02  -.2912692E-03   .1185279E-02   .2012247E-02   .2120303E-02
   .1521451E-02   .2663447E-03  -.1542475E-02  -.3712601E-02  -.6068207E-02
  -.8510512E-02  -.1096687E-01  -.1335604E-01  -.1560153E-01  -.1760288E-01
  -.1920893E-01  -.2024341E-01  -.2062836E-01  -.2047482E-01  -.2005676E-01
  -.1970942E-01  -.1966819E-01  -.1997435E-01  -.2052686E-01  -.2117964E-01
  -.2183291E-01  -.2247922E-01  -.2316458E-01  -.2393012E-01  -.2481099E-01
  -.2582298E-01  -.2692352E-01  -.2801402E-01  -.2895599E-01  -.2960511E-01
  -.2992051E-01  -.2996972E-01  -.2982284E-01  -.2954094E-01  -.2913191E-01
  -.2855794E-01  -.2778473E-01  -.2682819E-01  -.2577738E-01  -.2479244E-01
  -.2413980E-01  -.2408746E-01  -.2471618E-01  -.2585342E-01  -.2714686E-01
  -.2823063E-01  -.2888736E-01  -.2913508E-01  -.2921730E-01  -.2942599E-01
  -.2996829E-01  -.3085880E-01  -.3181853E-01  -.3239756E-01  -.3223782E-01
  -.3128227E-01  -.2975512E-01  -.2803314E-01  -.2644885E-01  -.2511005E-01
  -.2391642E-01  -.2262188E-01  -.2090959E-01  -.1851983E-01  -.1539361E-01
  -.1170531E-01  -.7699352E-02  -.3561171E-02   .6068934E-03   .4779140E-02
   .8929884E-02   .1289657E-01   .1651664E-01   .1985374E-01   .2307510E-01
   .2625927E-01   .2927929E-01   .3191328E-01   .3409993E-01   .3596733E-01
   .3774194E-01   .3956462E-01   .4138554E-01   .4302501E-01   .4430769E-01
   .4517918E-01   .4570479E-01   .4600386E-01   .4619798E-01   .4644685E-01
   .4686580E-01   .4736551E-01   .4775759E-01   .4789920E-01   .4778430E-01
   .4745670E-01   .4696293E-01   .4640264E-01   .4583612E-01   .4527114E-01
   .4464310E-01   .4383819E-01   .4271115E-01   .4114688E-01   .3910471E-01
   .3665232E-01   .3392553E-01   .3099070E-01   .2780140E-01   .2430900E-01
   .2055687E-01   .1664506E-01   .1255746E-01   .8115478E-02   .3268864E-02
  -.1693133E-02  -.6386964E-02  -.1076216E-01  -.1506349E-01  -.1944551E-01
  -.2375690E-01  -.2761100E-01  -.3068525E-01  -.3297813E-01  -.3474492E-01
  -.3620906E-01  -.3742272E-01  -.3832307E-01  -.3882821E-01  -.3896678E-01
  -.3880917E-01  -.3838389E-01  -.3776709E-01  -.3709796E-01  -.3646829E-01
  -.3586129E-01  -.3513135E-01  -.3412328E-01  -.3276113E-01  -.3107599E-01
  -.2919979E-01  -.2724755E-01  -.2527494E-01  -.2330445E-01  -.2137777E-01
  -.1954712E-01  -.1790754E-01  -.1660881E-01  -.1580048E-01  -.1556569E-01
  -.1581667E-01  -.1624407E-01  -.1647910E-01  -.1634829E-01  -.1588096E-01
  -.1514946E-01  -.1419142E-01  -.1297834E-01  -.1140980E-01  -.9437870E-02
  -.7124456E-02  -.4613566E-02  -.2136536E-02  -.6848156E-05   .1432659E-02
   .1942054E-02   .1513346E-02   .3711012E-03  -.1028614E-02  -.2128537E-02
  -.2496636E-02  -.1875635E-02  -.2391200E-03   .2149443E-02   .4884024E-02
   .7620590E-02   .1020436E-01   .1268243E-01   .1519944E-01   .1791523E-01
   .2089949E-01   .2399679E-01   .2687165E-01   .2924357E-01   .3107701E-01
   .3258071E-01   .3398080E-01   .3535912E-01   .3663322E-01   .3762629E-01
   .3820242E-01   .3832431E-01   .3805402E-01   .3750231E-01   .3680105E-01
   .3601203E-01   .3511092E-01   .3405591E-01   .3280608E-01   .3138122E-01
   .2988757E-01   .2842533E-01   .2702474E-01   .2569616E-01   .2441742E-01
   .2316449E-01   .2203701E-01   .2113997E-01   .2048869E-01   .1996765E-01
   .1945956E-01   .1894276E-01   .1842686E-01   .1792389E-01   .1744252E-01
   .1697499E-01   .1642636E-01   .1560980E-01   .1425900E-01   .1209723E-01
   .8864537E-02   .4531540E-02  -.5035766E-03  -.5599974E-02  -.1030801E-01
  -.1457787E-01  -.1869361E-01  -.2294711E-01  -.2737688E-01  -.3178359E-01
  -.3590464E-01  -.3953046E-01  -.4256525E-01  -.4494205E-01  -.4660908E-01
  -.4764479E-01  -.4818523E-01  -.4832196E-01  -.4802215E-01  -.4723749E-01
  -.4599911E-01  -.4438626E-01  -.4253020E-01  -.4060525E-01  -.3870118E-01
  -.3675811E-01  -.3463350E-01  -.3223416E-01  -.2960487E-01  -.2690005E-01
  -.2426388E-01  -.2177562E-01  -.1948675E-01  -.1734031E-01  -.1516161E-01
  -.1280843E-01  -.1026302E-01  -.7623687E-02  -.5031247E-02  -.2639745E-02
  -.5045172E-03   .1349362E-02   .2825851E-02   .3841492E-02   .4414566E-02
   .4608260E-02   .4488589E-02   .4185149E-02   .3844720E-02   .3593256E-02
   .3585118E-02   .3962933E-02   .4842372E-02   .6269590E-02   .8153913E-02
   .1030993E-01   .1259542E-01   .1497932E-01   .1748985E-01   .2010754E-01
   .2268874E-01   .2497015E-01   .2677407E-01   .2811303E-01   .2913745E-01
   .2998280E-01   .3071392E-01   .3132651E-01   .3174866E-01   .3191203E-01
   .3176493E-01   .3128251E-01   .3043414E-01   .2918209E-01   .2750223E-01
   .2540466E-01   .2291553E-01   .2013878E-01   .1718501E-01   .1412834E-01
   .1095763E-01   .7583970E-02   .4086681E-02   .7531089E-03  -.2169835E-02
  -.4678471E-02  -.7009334E-02  -.9334576E-02  -.1162749E-01  -.1373015E-01
  -.1550138E-01  -.1697296E-01  -.1831341E-01  -.1969337E-01  -.2117991E-01
  -.2270410E-01  -.2411893E-01  -.2533282E-01  -.2635763E-01  -.2726254E-01
  -.2820766E-01  -.2936983E-01  -.3086912E-01  -.3276967E-01  -.3497886E-01
  -.3722290E-01  -.3914438E-01  -.4048307E-01  -.4121961E-01  -.4162410E-01
  -.4206855E-01  -.4279003E-01  -.4379008E-01  -.4485111E-01  -.4572599E-01
  -.4629102E-01  -.4655877E-01  -.4663266E-01  -.4667559E-01  -.4683108E-01
  -.4710598E-01  -.4735903E-01  -.4732321E-01  -.4673740E-01  -.4548500E-01
  -.4357004E-01  -.4110547E-01  -.3824214E-01  -.3517477E-01  -.3204273E-01
  -.2885538E-01  -.2551132E-01  -.2181768E-01  -.1761813E-01  -.1287960E-01
  -.7782873E-02  -.2710359E-02   .1977192E-02   .6126690E-02   .9751187E-02
   .1295366E-01   .1590656E-01   .1888469E-01   .2225066E-01   .2618430E-01
   .3047366E-01   .3469568E-01   .3850754E-01   .4176444E-01   .4449900E-01
   .4677727E-01   .4865492E-01   .5017585E-01   .5131751E-01   .5196864E-01
   .5200885E-01   .5136054E-01   .5000987E-01   .4802413E-01   .4560715E-01
   .4302085E-01   .4050537E-01   .3827110E-01   .3647064E-01   .3512682E-01
   .3419397E-01   .3362844E-01   .3335250E-01   .3328748E-01   .3338852E-01
   .3358738E-01   .3371741E-01   .3355568E-01   .3294837E-01   .3171518E-01
   .2964342E-01   .2667945E-01   .2298733E-01   .1878412E-01   .1418974E-01
   .9163227E-02   .3716804E-02  -.1797651E-02  -.6803308E-02  -.1090289E-01
  -.1408464E-01  -.1659079E-01  -.1859421E-01  -.2004138E-01  -.2085144E-01
  -.2110617E-01  -.2098966E-01  -.2068021E-01  -.2035245E-01  -.2011581E-01
  -.2002289E-01  -.2013115E-01  -.2048827E-01  -.2103919E-01  -.2164029E-01
  -.2219830E-01  -.2271551E-01  -.2324794E-01  -.2384742E-01  -.2461637E-01
  -.2563659E-01  -.2686854E-01  -.2817309E-01  -.2932771E-01  -.3005041E-01
  -.3014265E-01  -.2954404E-01  -.2831954E-01  -.2658598E-01  -.2447650E-01
  -.2214499E-01  -.1971341E-01  -.1720745E-01  -.1459852E-01  -.1190622E-01
  -.9193033E-02  -.6596909E-02  -.4314255E-02  -.2568187E-02  -.1585999E-02
  -.1473346E-02  -.2149904E-02  -.3382915E-02  -.4821001E-02  -.6165871E-02
  -.7288533E-02  -.8176161E-02  -.8901239E-02  -.9575596E-02  -.1026631E-01
  -.1095979E-01  -.1160407E-01  -.1216923E-01  -.1266477E-01  -.1316486E-01
  -.1383097E-01  -.1478282E-01  -.1596498E-01  -.1717318E-01  -.1825522E-01
  -.1917090E-01  -.1994575E-01  -.2067577E-01  -.2146059E-01  -.2232891E-01
  -.2325692E-01  -.2418783E-01  -.2507118E-01  -.2591355E-01  -.2682497E-01
  -.2792225E-01  -.2918209E-01  -.3048690E-01  -.3165465E-01  -.3245312E-01
  -.3268425E-01  -.3234205E-01  -.3155592E-01  -.3045415E-01  -.2911648E-01
  -.2758515E-01  -.2587098E-01  -.2402632E-01  -.2218003E-01  -.2053064E-01
  -.1922346E-01  -.1831046E-01  -.1777465E-01  -.1754187E-01  -.1751559E-01
  -.1761536E-01  -.1773453E-01  -.1774518E-01  -.1756563E-01  -.1720161E-01
  -.1664945E-01  -.1589820E-01  -.1497298E-01  -.1392743E-01  -.1282905E-01
  -.1176607E-01  -.1077457E-01  -.9757417E-02  -.8599216E-02  -.7314386E-02
  -.6018650E-02  -.4907497E-02  -.4206731E-02  -.4027928E-02  -.4349891E-02
  -.5177893E-02  -.6491584E-02  -.8083383E-02  -.9584753E-02  -.1065247E-01
  -.1109432E-01  -.1086952E-01  -.1002645E-01  -.8648038E-02  -.6799935E-02
  -.4557400E-02  -.1999430E-02   .8450425E-03   .3976652E-02   .7386904E-02
   .1099223E-01   .1456934E-01   .1791166E-01   .2098491E-01   .2379912E-01
   .2625753E-01   .2813137E-01   .2922488E-01   .2958468E-01   .2945583E-01
   .2908569E-01   .2856288E-01   .2783153E-01   .2675240E-01   .2522144E-01
   .2327476E-01   .2103978E-01   .1868282E-01   .1633140E-01   .1402066E-01
   .1176639E-01   .9614834E-02   .7662491E-02   .5983203E-02   .4487004E-02
   .2923609E-02   .1166466E-02  -.6898069E-03  -.2484511E-02  -.4045842E-02
  -.5278120E-02  -.6222261E-02  -.6960483E-02  -.7558589E-02  -.8053411E-02
  -.8553439E-02  -.9225889E-02  -.1014890E-01  -.1128588E-01  -.1248107E-01
  -.1349699E-01  -.1416406E-01  -.1441522E-01  -.1430691E-01  -.1395316E-01
  -.1347476E-01  -.1290517E-01  -.1215123E-01  -.1100219E-01  -.9200031E-02
  -.6497880E-02  -.2686469E-02   .2198524E-02   .7719833E-02   .1326560E-01
   .1845199E-01   .2333782E-01   .2828588E-01   .3347014E-01   .3858784E-01
   .4313168E-01   .4674654E-01   .4936786E-01   .5118852E-01   .5245676E-01
   .5330881E-01   .5372265E-01   .5365292E-01   .5316198E-01   .5232818E-01
   .5122203E-01   .4989417E-01   .4836159E-01   .4665697E-01   .4489084E-01
   .4316596E-01   .4148007E-01   .3973296E-01   .3778624E-01   .3552148E-01
   .3292305E-01   .3012408E-01   .2732251E-01   .2473517E-01   .2254573E-01
   .2083706E-01   .1955373E-01   .1856131E-01   .1768496E-01   .1680715E-01
   .1595063E-01   .1523925E-01   .1477271E-01   .1456714E-01   .1464678E-01
   .1500915E-01   .1558773E-01   .1624641E-01   .1678663E-01   .1704903E-01
   .1696224E-01   .1650861E-01   .1568438E-01   .1453790E-01   .1316829E-01
   .1168612E-01   .1014380E-01   .8424163E-02   .6367515E-02   .4015206E-02
   .1605525E-02  -.6736720E-03  -.2809065E-02  -.4859580E-02  -.6869716E-02
  -.8840302E-02  -.1073311E-01  -.1251444E-01  -.1422440E-01  -.1594530E-01
  -.1770342E-01  -.1946107E-01  -.2116738E-01  -.2278288E-01  -.2429293E-01
  -.2567354E-01  -.2686984E-01  -.2781396E-01  -.2843640E-01  -.2872949E-01
  -.2879349E-01  -.2876422E-01  -.2876915E-01  -.2888460E-01  -.2912503E-01
  -.2949297E-01  -.3002486E-01  -.3071801E-01  -.3149610E-01  -.3224238E-01
  -.3284098E-01  -.3319320E-01  -.3322406E-01  -.3290385E-01  -.3223715E-01
  -.3122840E-01  -.2982761E-01  -.2798185E-01  -.2573706E-01  -.2322756E-01
  -.2065898E-01  -.1826287E-01  -.1617467E-01  -.1448209E-01  -.1326431E-01
  -.1251899E-01  -.1212833E-01  -.1189341E-01  -.1161793E-01  -.1121446E-01
  -.1074477E-01  -.1026743E-01  -.9780236E-02  -.9225137E-02  -.8541061E-02
  -.7718962E-02  -.6830928E-02  -.5940673E-02  -.4988713E-02  -.3871762E-02
  -.2582606E-02  -.1176486E-02   .3096745E-03   .1879723E-02   .3551981E-02
   .5318255E-02   .7184711E-02   .9138496E-02   .1110393E-01   .1303296E-01
   .1498036E-01   .1705045E-01   .1928996E-01   .2161417E-01   .2379616E-01
   .2561544E-01   .2699990E-01   .2797790E-01   .2862030E-01   .2898587E-01
   .2914898E-01   .2921248E-01   .2921587E-01   .2912161E-01   .2888776E-01
   .2851106E-01   .2800279E-01   .2734377E-01   .2650736E-01   .2546434E-01
   .2415612E-01   .2251703E-01   .2049644E-01   .1812734E-01   .1551241E-01
   .1272968E-01   .9799770E-02   .6687545E-02   .3469702E-02   .3811688E-03
  -.2426922E-02  -.5090203E-02  -.7799189E-02  -.1055019E-01  -.1314473E-01
  -.1538670E-01  -.1726239E-01  -.1891441E-01  -.2048598E-01  -.2202407E-01
  -.2345989E-01  -.2465815E-01  -.2550136E-01  -.2592666E-01  -.2598052E-01
  -.2577014E-01  -.2540299E-01  -.2504433E-01  -.2486060E-01  -.2488131E-01
  -.2502722E-01  -.2524577E-01  -.2552024E-01  -.2583027E-01  -.2621627E-01
  -.2674013E-01  -.2739471E-01  -.2807349E-01  -.2863833E-01  -.2889632E-01
  -.2867034E-01  -.2791892E-01  -.2673574E-01  -.2520478E-01  -.2333212E-01
  -.2105660E-01  -.1828245E-01  -.1497698E-01  -.1121516E-01  -.7180329E-02
  -.3093304E-02   .8628297E-03   .4602827E-02   .8075051E-02   .1115376E-01
   .1375267E-01   .1592994E-01   .1780109E-01   .1938037E-01   .2053518E-01
   .2108199E-01   .2096838E-01   .2035434E-01   .1944598E-01   .1842978E-01
   .1747328E-01   .1669795E-01   .1619010E-01   .1599481E-01   .1613685E-01
   .1660377E-01   .1731503E-01   .1811623E-01   .1882500E-01   .1931977E-01
   .1961032E-01   .1981353E-01   .2010473E-01   .2059534E-01   .2126484E-01
   .2203247E-01   .2272912E-01   .2306517E-01   .2279679E-01   .2180473E-01
   .1999211E-01   .1733027E-01   .1376747E-01   .9184430E-02   .3653876E-02
  -.2365744E-02  -.8244254E-02  -.1356106E-01  -.1828922E-01  -.2258579E-01
  -.2647789E-01  -.2985437E-01  -.3264287E-01  -.3495645E-01  -.3706562E-01
  -.3924402E-01  -.4160617E-01  -.4406691E-01  -.4641862E-01  -.4840618E-01
  -.4987433E-01  -.5089768E-01  -.5163483E-01  -.5217111E-01  -.5250259E-01
  -.5258384E-01  -.5232981E-01  -.5161325E-01  -.5034432E-01  -.4851942E-01
  -.4618673E-01  -.4339430E-01  -.4029523E-01  -.3715642E-01  -.3426319E-01
  -.3184994E-01  -.2997011E-01  -.2850191E-01  -.2729386E-01  -.2623421E-01
  -.2522877E-01  -.2427587E-01  -.2346979E-01  -.2285652E-01  -.2236323E-01
  -.2185265E-01  -.2127889E-01  -.2072154E-01  -.2029865E-01  -.2009006E-01
  -.2010025E-01  -.2033913E-01  -.2088284E-01  -.2175228E-01  -.2285500E-01
  -.2405272E-01  -.2527458E-01  -.2656132E-01  -.2793121E-01  -.2931469E-01
  -.3053439E-01  -.3139505E-01  -.3183342E-01  -.3185236E-01  -.3139951E-01
  -.3044566E-01  -.2903931E-01  -.2728161E-01  -.2525436E-01  -.2306854E-01
  -.2085538E-01  -.1872905E-01  -.1678929E-01  -.1504194E-01  -.1350359E-01
  -.1227079E-01  -.1146297E-01  -.1111844E-01  -.1122284E-01  -.1180157E-01
  -.1286102E-01  -.1430732E-01  -.1591553E-01  -.1741719E-01  -.1869303E-01
  -.1976835E-01  -.2069770E-01  -.2150445E-01  -.2217024E-01  -.2263870E-01
  -.2280591E-01  -.2264167E-01  -.2219312E-01  -.2150732E-01  -.2059854E-01
  -.1950169E-01  -.1830862E-01  -.1716633E-01  -.1622975E-01  -.1559100E-01
  -.1533021E-01  -.1549687E-01  -.1607350E-01  -.1696780E-01  -.1804290E-01
  -.1918375E-01  -.2033462E-01  -.2142480E-01  -.2240241E-01  -.2329913E-01
  -.2419750E-01  -.2518496E-01  -.2622769E-01  -.2716197E-01  -.2786287E-01
  -.2834132E-01  -.2860605E-01  -.2855089E-01  -.2805192E-01  -.2709678E-01
  -.2579919E-01  -.2433071E-01  -.2283631E-01  -.2138618E-01  -.1996687E-01
  -.1853627E-01  -.1708035E-01  -.1558436E-01  -.1401825E-01  -.1247353E-01
  -.1112315E-01  -.1010970E-01  -.9519625E-02  -.9372726E-02  -.9582652E-02
  -.1000818E-01  -.1050466E-01  -.1093039E-01  -.1116762E-01  -.1119631E-01
  -.1110791E-01  -.1102897E-01  -.1100873E-01  -.1100722E-01  -.1094098E-01
  -.1064552E-01  -.9934101E-02  -.8740244E-02  -.7158569E-02  -.5399512E-02
  -.3697474E-02  -.2204580E-02  -.9347438E-03   .2760357E-03   .1623049E-02
   .3189828E-02   .4935586E-02   .6770839E-02   .8603954E-02   .1036643E-01
   .1197795E-01   .1334873E-01   .1441967E-01   .1518402E-01   .1569155E-01
   .1597354E-01   .1609302E-01   .1625903E-01   .1668930E-01   .1745789E-01
   .1848326E-01   .1960887E-01   .2077410E-01   .2193525E-01   .2297947E-01
   .2374008E-01   .2403583E-01   .2372131E-01   .2265938E-01   .2055459E-01
   .1696248E-01   .1162612E-01   .4947393E-02  -.2102755E-02  -.8648769E-02
  -.1443354E-01  -.1966673E-01  -.2453834E-01  -.2896591E-01  -.3276161E-01
  -.3589378E-01  -.3851003E-01  -.4074766E-01  -.4257930E-01  -.4391844E-01
  -.4471513E-01  -.4505703E-01  -.4513208E-01  -.4512117E-01  -.4515739E-01
  -.4528464E-01  -.4543388E-01  -.4549124E-01  -.4540174E-01  -.4521312E-01
  -.4502469E-01  -.4488671E-01  -.4475533E-01  -.4452732E-01  -.4411127E-01
  -.4348161E-01  -.4271053E-01  -.4191716E-01  -.4127254E-01  -.4089928E-01
  -.4079314E-01  -.4083292E-01  -.4078875E-01  -.4043181E-01  -.3963342E-01
  -.3845805E-01  -.3713268E-01  -.3588960E-01  -.3483022E-01  -.3393525E-01
  -.3307399E-01  -.3211542E-01  -.3102428E-01  -.2976306E-01  -.2832724E-01
  -.2685934E-01  -.2557429E-01  -.2462494E-01  -.2392811E-01  -.2323850E-01
  -.2241988E-01  -.2143040E-01  -.2029987E-01  -.1907312E-01  -.1774502E-01
  -.1632734E-01  -.1479250E-01  -.1294146E-01  -.1050671E-01  -.7309151E-02
  -.3395425E-02   .9147841E-03   .5200543E-02   .9175831E-02   .1275520E-01
   .1600286E-01   .1901223E-01   .2175664E-01   .2414641E-01   .2612612E-01
   .2767078E-01   .2879319E-01   .2948725E-01   .2973989E-01   .2960273E-01
   .2919799E-01   .2866986E-01   .2807846E-01   .2738139E-01   .2648602E-01
   .2534573E-01   .2400655E-01   .2256474E-01   .2110142E-01   .1967282E-01
   .1839523E-01   .1743500E-01   .1685008E-01   .1651468E-01   .1620135E-01
   .1569904E-01   .1493601E-01   .1395381E-01   .1286566E-01   .1181417E-01
   .1088593E-01   .1009580E-01   .9378584E-02   .8600869E-02   .7583351E-02
   .6190296E-02   .4411888E-02   .2362837E-02   .2158150E-03  -.1886519E-02
  -.3811720E-02  -.5513904E-02  -.7017972E-02  -.8354717E-02  -.9530025E-02
  -.1044537E-01  -.1093484E-01  -.1087273E-01  -.1020436E-01  -.8932520E-02
  -.7189285E-02  -.5218331E-02  -.3276727E-02  -.1529179E-02  -.1730760E-04
   .1278193E-02   .2395242E-02   .3365510E-02   .4179204E-02   .4817294E-02
   .5275812E-02   .5571100E-02   .5773424E-02   .5975477E-02   .6236548E-02
   .6610244E-02   .7216978E-02   .8166179E-02   .9487697E-02   .1114306E-01
   .1300098E-01   .1489449E-01   .1661726E-01   .1798292E-01   .1887548E-01
   .1926569E-01   .1923112E-01   .1886954E-01   .1822303E-01   .1730632E-01
   .1614524E-01   .1476131E-01   .1319582E-01   .1152275E-01   .9870362E-02
   .8369127E-02   .7021844E-02   .5766571E-02   .4530914E-02   .3251548E-02
   .1914314E-02   .5334712E-03  -.8833413E-03  -.2331835E-02  -.3810762E-02
  -.5295877E-02  -.6675980E-02  -.7805011E-02  -.8630764E-02  -.9188754E-02
  -.9518768E-02  -.9685211E-02  -.9754859E-02  -.9678125E-02  -.9310147E-02
  -.8540999E-02  -.7338007E-02  -.5703132E-02  -.3665028E-02  -.1261318E-02
   .1436063E-02   .4292980E-02   .7132521E-02   .9752634E-02   .1194322E-01
   .1360438E-01   .1476175E-01   .1556455E-01   .1620635E-01   .1679414E-01
   .1731885E-01   .1776636E-01   .1815093E-01   .1843877E-01   .1858402E-01
   .1863897E-01   .1874220E-01   .1898260E-01   .1936826E-01   .1981678E-01
   .2019928E-01   .2041593E-01   .2037640E-01   .2002302E-01   .1936181E-01
   .1848472E-01   .1757786E-01   .1683760E-01   .1638951E-01   .1624589E-01
   .1633171E-01   .1650354E-01   .1660675E-01   .1652191E-01   .1622666E-01
   .1581781E-01   .1538190E-01   .1492523E-01   .1440184E-01   .1368072E-01
   .1261903E-01   .1114984E-01   .9242926E-02   .6906841E-02   .4213850E-02
   .1254551E-02  -.1864802E-02  -.4999079E-02  -.8018229E-02  -.1086913E-01
  -.1352314E-01  -.1587115E-01  -.1781619E-01  -.1929389E-01  -.2022522E-01
  -.2054307E-01  -.2024639E-01  -.1947158E-01  -.1844065E-01  -.1733939E-01
  -.1632020E-01  -.1549834E-01  -.1495468E-01  -.1468883E-01  -.1460680E-01
  -.1460075E-01  -.1464059E-01  -.1475323E-01  -.1495459E-01  -.1518714E-01
  -.1539604E-01  -.1549977E-01  -.1538310E-01  -.1489676E-01  -.1391775E-01
  -.1247971E-01  -.1076772E-01  -.8962679E-02  -.7210240E-02  -.5679073E-02
  -.4492569E-02  -.3677508E-02  -.3157288E-02  -.2884529E-02  -.2888303E-02
  -.3188725E-02  -.3808325E-02  -.4796101E-02  -.6155737E-02  -.7794966E-02
  -.9573508E-02  -.1132359E-01  -.1294824E-01  -.1444950E-01  -.1587810E-01
  -.1720722E-01  -.1825135E-01  -.1879371E-01  -.1870937E-01  -.1798963E-01
  -.1669871E-01  -.1498801E-01  -.1306834E-01  -.1112665E-01  -.9279934E-02
  -.7599152E-02  -.6091411E-02  -.4737723E-02  -.3543610E-02  -.2536794E-02
  -.1693652E-02  -.9690535E-03  -.3304752E-03   .2741057E-03   .9615309E-03
   .1785453E-02   .2637915E-02   .3343768E-02   .3755433E-02   .3807546E-02
   .3540562E-02   .3033212E-02   .2339084E-02   .1545596E-02   .7389531E-03
  -.5389972E-04  -.7906849E-03  -.1350679E-02  -.1592088E-02  -.1432295E-02
  -.8134838E-03   .3784458E-03   .2182152E-02   .4498445E-02   .7161129E-02
   .9946374E-02   .1270680E-01   .1542814E-01   .1815618E-01   .2089605E-01
   .2353680E-01   .2601372E-01   .2846088E-01   .3110537E-01   .3408622E-01
   .3735164E-01   .4069276E-01   .4394531E-01   .4711835E-01   .5024140E-01
   .5328447E-01   .5620277E-01   .5897217E-01   .6156489E-01   .6394805E-01
   .6608086E-01   .6795484E-01   .6963307E-01   .7115527E-01   .7245833E-01
   .7340817E-01   .7393006E-01   .7403391E-01   .7376402E-01   .7317634E-01
   .7231499E-01   .7121826E-01   .6991406E-01   .6836223E-01   .6644915E-01
   .6412518E-01   .6150923E-01   .5870842E-01   .5576390E-01   .5273457E-01
   .4975106E-01   .4699428E-01   .4455555E-01   .4233507E-01   .4012404E-01
   .3778180E-01   .3528190E-01   .3266625E-01   .3000779E-01   .2742953E-01
   .2501822E-01   .2273570E-01   .2040806E-01   .1779696E-01   .1476161E-01
   .1146880E-01   .8357649E-02   .5836721E-02   .3971192E-02   .2550016E-02
   .1419461E-02   .5252258E-03  -.1924002E-03  -.8016172E-03  -.1329189E-02
  -.1804460E-02  -.2314209E-02  -.2945107E-02  -.3676830E-02  -.4451091E-02
  -.5305329E-02  -.6366715E-02  -.7703813E-02  -.9293694E-02  -.1110881E-01
  -.1312375E-01  -.1525171E-01  -.1722861E-01  -.1870146E-01  -.1937701E-01
  -.1913533E-01  -.1805995E-01  -.1627439E-01  -.1384066E-01  -.1084934E-01
  -.7530166E-02  -.4173819E-02  -.9704683E-03   .1947189E-02   .4446452E-02
   .6387184E-02   .7729731E-02   .8550719E-02   .8967688E-02   .9186128E-02
   .9481292E-02   .1009845E-01   .1112364E-01   .1247611E-01   .1398577E-01
   .1552952E-01   .1704441E-01   .1852816E-01   .2008151E-01   .2184692E-01
   .2380517E-01   .2582939E-01   .2778192E-01   .2952925E-01   .3099458E-01
   .3224043E-01   .3333494E-01   .3427293E-01   .3506688E-01   .3571704E-01
   .3623745E-01   .3665514E-01   .3701155E-01   .3738056E-01   .3781315E-01
   .3830207E-01   .3876260E-01   .3904560E-01   .3907469E-01   .3892271E-01
   .3870473E-01   .3842590E-01   .3803917E-01   .3748091E-01   .3663510E-01
   .3531031E-01   .3331162E-01   .3057809E-01   .2717857E-01   .2328167E-01
   .1908387E-01   .1475940E-01   .1047335E-01   .6416765E-02   .2728048E-02
  -.5664333E-03  -.3553325E-02  -.6316178E-02  -.8736994E-02  -.1057606E-01
  -.1168155E-01  -.1212493E-01  -.1218475E-01  -.1213696E-01  -.1212050E-01
  -.1219934E-01  -.1239794E-01  -.1276533E-01  -.1339806E-01  -.1435842E-01
  -.1566202E-01  -.1731303E-01  -.1926319E-01  -.2142062E-01  -.2366672E-01
  -.2588535E-01  -.2794666E-01  -.2972272E-01  -.3117090E-01  -.3230727E-01
  -.3313070E-01  -.3359374E-01  -.3368031E-01  -.3344221E-01  -.3296051E-01
  -.3230789E-01  -.3155403E-01  -.3076527E-01  -.2998560E-01  -.2918069E-01
  -.2835528E-01  -.2759451E-01  -.2693233E-01  -.2635014E-01  -.2583590E-01
  -.2537972E-01  -.2499921E-01  -.2470732E-01  -.2452730E-01  -.2446334E-01
  -.2437607E-01  -.2404911E-01  -.2330409E-01  -.2203111E-01  -.2024016E-01
  -.1808898E-01  -.1577888E-01  -.1349206E-01  -.1136379E-01  -.9447030E-02
  -.7711842E-02  -.6106203E-02  -.4654982E-02  -.3401775E-02  -.2353832E-02
  -.1476084E-02  -.6876586E-03   .1226434E-03   .1091957E-02   .2352354E-02
   .3998169E-02   .6027401E-02   .8340170E-02   .1078590E-01   .1322506E-01
   .1552163E-01   .1752674E-01   .1922139E-01   .2076073E-01   .2231997E-01
   .2394237E-01   .2552044E-01   .2683452E-01   .2773903E-01   .2820534E-01
   .2821481E-01   .2775712E-01   .2689679E-01   .2579977E-01   .2465077E-01
   .2357743E-01   .2267384E-01   .2199615E-01   .2154124E-01   .2127843E-01
   .2118441E-01   .2124299E-01   .2142417E-01   .2166422E-01   .2190427E-01
   .2207852E-01   .2204123E-01   .2157129E-01   .2038666E-01   .1825073E-01
   .1504934E-01   .1088240E-01   .6139310E-02   .1318467E-02  -.3239261E-02
  -.7501489E-02  -.1160747E-01  -.1563149E-01  -.1952553E-01  -.2316943E-01
  -.2650365E-01  -.2953796E-01  -.3227648E-01  -.3466495E-01  -.3665492E-01
  -.3819244E-01  -.3928903E-01  -.4005093E-01  -.4060341E-01  -.4102493E-01
  -.4134954E-01  -.4155584E-01  -.4158741E-01  -.4141033E-01  -.4100173E-01
  -.4029447E-01  -.3920870E-01  -.3775144E-01  -.3597975E-01  -.3400046E-01
  -.3200628E-01  -.3019137E-01  -.2863226E-01  -.2730445E-01  -.2612570E-01
  -.2504483E-01  -.2398881E-01  -.2287009E-01  -.2166165E-01  -.2034993E-01
  -.1897424E-01  -.1753227E-01  -.1599845E-01  -.1438344E-01  -.1262525E-01
  -.1064601E-01  -.8490380E-02  -.6253617E-02  -.3997666E-02  -.1777877E-02
   .3617806E-03   .2419022E-02   .4428998E-02   .6384555E-02   .8253994E-02
   .1000871E-01   .1171817E-01   .1347806E-01   .1529850E-01   .1714969E-01
   .1900410E-01   .2080060E-01   .2255783E-01   .2439397E-01   .2635086E-01
   .2835567E-01   .3031653E-01   .3215967E-01   .3387788E-01   .3554378E-01
   .3724170E-01   .3895614E-01   .4059136E-01   .4205703E-01   .4335024E-01
   .4454292E-01   .4565652E-01   .4665364E-01   .4746710E-01   .4801961E-01
   .4828876E-01   .4826913E-01   .4795552E-01   .4735432E-01   .4645822E-01
   .4529248E-01   .4386830E-01   .4217195E-01   .4023073E-01   .3812720E-01
   .3591790E-01   .3361354E-01   .3122751E-01   .2873112E-01   .2611196E-01
   .2339119E-01   .2054522E-01   .1746902E-01   .1398733E-01   .1014189E-01
   .6311662E-02   .2931866E-02   .1539143E-03  -.2142294E-02  -.4112605E-02
  -.5757426E-02  -.6964377E-02  -.7652958E-02  -.7857656E-02  -.7631540E-02
  -.6936963E-02  -.5772329E-02  -.4221314E-02  -.2352838E-02  -.2787471E-03
   .1808853E-02   .3757895E-02   .5543277E-02   .7221802E-02   .8869913E-02
   .1054395E-01   .1227336E-01   .1402231E-01   .1566355E-01   .1707615E-01
   .1820569E-01   .1912499E-01   .1990511E-01   .2050035E-01   .2085116E-01
   .2101310E-01   .2113535E-01   .2131045E-01   .2159407E-01   .2208938E-01
   .2289006E-01   .2403658E-01   .2553478E-01   .2735749E-01   .2943039E-01
   .3167810E-01   .3403223E-01   .3642307E-01   .3877415E-01   .4107072E-01
   .4332771E-01   .4548196E-01   .4743246E-01   .4908389E-01   .5037640E-01
   .5128333E-01   .5180694E-01   .5199006E-01   .5186590E-01   .5145411E-01
   .5082546E-01   .5003574E-01   .4910517E-01   .4807466E-01   .4694084E-01
   .4565827E-01   .4421081E-01   .4259639E-01   .4079329E-01   .3882021E-01
   .3674518E-01   .3460848E-01   .3235719E-01   .2998214E-01   .2752062E-01
   .2503574E-01   .2263969E-01   .2041646E-01   .1831403E-01   .1613852E-01
   .1366890E-01   .1073519E-01   .7288144E-02   .3521978E-02  -.1739172E-03
  -.3508621E-02  -.6481732E-02  -.9253454E-02  -.1189062E-01  -.1434458E-01
  -.1655824E-01  -.1849265E-01  -.2012745E-01  -.2143693E-01  -.2234957E-01
  -.2275693E-01  -.2254841E-01  -.2171811E-01  -.2039452E-01  -.1874352E-01
  -.1698127E-01  -.1534422E-01  -.1402792E-01  -.1311331E-01  -.1253913E-01
  -.1216768E-01  -.1188234E-01  -.1173329E-01  -.1190915E-01  -.1250434E-01
  -.1350491E-01  -.1485817E-01  -.1643857E-01  -.1808026E-01  -.1965142E-01
  -.2100013E-01  -.2204537E-01  -.2284603E-01  -.2350011E-01  -.2407328E-01
  -.2460398E-01  -.2505341E-01  -.2538956E-01  -.2563752E-01  -.2577136E-01
  -.2580810E-01  -.2581191E-01  -.2581831E-01  -.2583109E-01  -.2585510E-01
  -.2586854E-01  -.2579397E-01  -.2559275E-01  -.2531523E-01  -.2502400E-01
  -.2476091E-01  -.2456388E-01  -.2446307E-01  -.2446981E-01  -.2449217E-01
  -.2433470E-01  -.2389966E-01  -.2320218E-01  -.2228719E-01  -.2120022E-01
  -.1997989E-01  -.1870775E-01  -.1748592E-01  -.1636355E-01  -.1532881E-01
  -.1435779E-01  -.1345683E-01  -.1265582E-01  -.1203441E-01  -.1172313E-01
  -.1180866E-01  -.1226855E-01  -.1301898E-01  -.1391220E-01  -.1478773E-01
  -.1554862E-01  -.1620337E-01  -.1676622E-01  -.1714920E-01  -.1724273E-01
  -.1700164E-01  -.1644115E-01  -.1563483E-01  -.1464761E-01  -.1355120E-01
  -.1250197E-01  -.1167905E-01  -.1118887E-01  -.1114752E-01  -.1166625E-01
  -.1280678E-01  -.1455389E-01  -.1681124E-01  -.1938568E-01  -.2200708E-01
  -.2445253E-01  -.2659921E-01  -.2844017E-01  -.3002177E-01  -.3141151E-01
  -.3264035E-01  -.3367498E-01  -.3442310E-01  -.3486952E-01  -.3507452E-01
  -.3508138E-01  -.3494060E-01  -.3466590E-01  -.3414614E-01  -.3321997E-01
  -.3181494E-01  -.2997784E-01  -.2784070E-01  -.2560715E-01  -.2350058E-01
  -.2169501E-01  -.2022558E-01  -.1898307E-01  -.1781993E-01  -.1664861E-01
  -.1541804E-01  -.1411065E-01  -.1281612E-01  -.1173296E-01  -.1104785E-01
  -.1077924E-01  -.1081667E-01  -.1102891E-01  -.1128354E-01  -.1145490E-01
  -.1148013E-01  -.1135743E-01  -.1112295E-01  -.1083053E-01  -.1048111E-01
  -.9989471E-02  -.9272957E-02  -.8289088E-02  -.7047346E-02  -.5635395E-02
  -.4221649E-02  -.2934491E-02  -.1803593E-02  -.7786786E-03   .2465855E-03
   .1324463E-02   .2433797E-02   .3475511E-02   .4293650E-02   .4747756E-02
   .4780857E-02   .4421379E-02   .3759951E-02   .2930074E-02   .2025097E-02
   .1085689E-02   .1045726E-03  -.9640437E-03  -.2143481E-02  -.3381188E-02
  -.4592696E-02  -.5610830E-02  -.6233245E-02  -.6353080E-02  -.5977414E-02
  -.5220001E-02  -.4180031E-02  -.2905686E-02  -.1458880E-02   .9144282E-04
   .1720278E-02   .3461785E-02   .5267048E-02   .6971530E-02   .8354405E-02
   .9194490E-02   .9352150E-02   .8807837E-02   .7655864E-02   .6047368E-02
   .4109131E-02   .1886562E-02  -.6508313E-03  -.3494643E-02  -.6523972E-02
  -.9529950E-02  -.1227549E-01  -.1461233E-01  -.1646516E-01  -.1782350E-01
  -.1871184E-01  -.1909250E-01  -.1894191E-01  -.1830010E-01  -.1719509E-01
  -.1568068E-01  -.1387910E-01  -.1193589E-01  -.9989022E-02  -.8135102E-02
  -.6415660E-02  -.4821813E-02  -.3374643E-02  -.2157298E-02  -.1259753E-02
  -.6906136E-03  -.4007554E-03  -.2696298E-03  -.1362316E-03   .1468290E-03
   .7171206E-03   .1674710E-02   .2995764E-02   .4577882E-02   .6331947E-02
   .8210435E-02   .1022890E-01   .1243230E-01   .1478391E-01   .1718776E-01
   .1952545E-01   .2175591E-01   .2396288E-01   .2621602E-01   .2848643E-01
   .3066099E-01   .3264032E-01   .3438389E-01   .3591405E-01   .3723784E-01
   .3835617E-01   .3932484E-01   .4023375E-01   .4113010E-01   .4200052E-01
   .4282189E-01   .4357131E-01   .4421131E-01   .4467994E-01   .4492573E-01
   .4497494E-01   .4490037E-01   .4477220E-01   .4466166E-01   .4456481E-01
   .4437210E-01   .4391246E-01   .4306467E-01   .4178528E-01   .4013983E-01
   .3822937E-01   .3617654E-01   .3414213E-01   .3224338E-01   .3053021E-01
   .2902673E-01   .2766315E-01   .2637591E-01   .2513613E-01   .2397724E-01
   .2295534E-01   .2210501E-01   .2143686E-01   .2090218E-01   .2044616E-01
   .2003444E-01   .1960249E-01   .1908133E-01   .1844616E-01   .1768599E-01
   .1683398E-01   .1596872E-01   .1516712E-01   .1444900E-01   .1377654E-01
   .1305502E-01   .1215339E-01   .1097204E-01   .9558446E-02   .8095519E-02
   .6755106E-02   .5590167E-02   .4627362E-02   .3868322E-02   .3191331E-02
   .2436756E-02   .1521059E-02   .4276606E-03  -.8154880E-03  -.2155046E-02
  -.3510435E-02  -.4805536E-02  -.5971694E-02  -.6972690E-02  -.7830907E-02
  -.8566221E-02  -.9158652E-02  -.9593624E-02  -.9889632E-02  -.1001897E-01
  -.9892647E-02  -.9486269E-02  -.8892232E-02  -.8245898E-02  -.7616309E-02
  -.7037666E-02  -.6570068E-02  -.6289022E-02  -.6197869E-02  -.6245874E-02
  -.6412075E-02  -.6726769E-02  -.7210723E-02  -.7865430E-02  -.8681665E-02
  -.9633128E-02  -.1067750E-01  -.1175826E-01  -.1280504E-01  -.1372644E-01
  -.1447261E-01  -.1510228E-01  -.1573296E-01  -.1638341E-01  -.1695016E-01
  -.1729854E-01  -.1735104E-01  -.1706823E-01  -.1641422E-01  -.1551281E-01
  -.1461414E-01  -.1388612E-01  -.1340860E-01  -.1314861E-01  -.1296438E-01
  -.1271918E-01  -.1232736E-01  -.1183174E-01  -.1139456E-01  -.1114998E-01
  -.1109558E-01  -.1112252E-01  -.1107454E-01  -.1081261E-01  -.1022232E-01
  -.9258995E-02  -.8028397E-02  -.6767950E-02  -.5694018E-02  -.4965517E-02
  -.4656289E-02  -.4765035E-02  -.5202672E-02  -.5858681E-02  -.6649797E-02
  -.7504202E-02  -.8374076E-02  -.9215714E-02  -.1000432E-01  -.1073351E-01
  -.1139002E-01  -.1194614E-01  -.1234663E-01  -.1255594E-01  -.1257867E-01
  -.1251979E-01  -.1256661E-01  -.1285912E-01  -.1339012E-01  -.1411693E-01
  -.1502713E-01  -.1607170E-01  -.1719277E-01  -.1828720E-01  -.1925641E-01
  -.2008390E-01  -.2078620E-01  -.2136534E-01  -.2181514E-01  -.2213196E-01
  -.2229852E-01  -.2226889E-01  -.2197177E-01  -.2133602E-01  -.2037450E-01
  -.1919145E-01  -.1788274E-01  -.1651592E-01  -.1516688E-01  -.1387632E-01
  -.1263006E-01  -.1146741E-01  -.1049340E-01  -.9802501E-02  -.9398389E-02
  -.9229263E-02  -.9220647E-02  -.9273669E-02  -.9280352E-02  -.9174442E-02
  -.8989552E-02  -.8795949E-02  -.8614557E-02  -.8462915E-02  -.8344773E-02
  -.8287533E-02  -.8282151E-02  -.8228835E-02  -.8030262E-02  -.7622329E-02
  -.6962626E-02  -.6033669E-02  -.4859593E-02  -.3444950E-02  -.1748714E-02
   .2540607E-03   .2510402E-02   .4960488E-02   .7658513E-02   .1063176E-01
   .1372953E-01   .1670727E-01   .1945353E-01   .2202979E-01   .2458510E-01
   .2717161E-01   .2960178E-01   .3161378E-01   .3305932E-01   .3395412E-01
   .3441209E-01   .3455508E-01   .3448558E-01   .3423098E-01   .3379749E-01
   .3324578E-01   .3267030E-01   .3212852E-01   .3166224E-01   .3134471E-01
   .3126987E-01   .3146922E-01   .3191917E-01   .3256927E-01   .3330045E-01
   .3398367E-01   .3457560E-01   .3512322E-01   .3571567E-01   .3636511E-01
   .3706159E-01   .3778752E-01   .3848789E-01   .3912275E-01   .3971576E-01
   .4031912E-01   .4094338E-01   .4152773E-01   .4195462E-01   .4212771E-01
   .4204690E-01   .4171463E-01   .4107088E-01   .4007783E-01   .3878358E-01
   .3726407E-01   .3554630E-01   .3362734E-01   .3150989E-01   .2922411E-01
   .2684814E-01   .2448089E-01   .2225159E-01   .2027869E-01   .1864047E-01
   .1735288E-01   .1633875E-01   .1549504E-01   .1475649E-01   .1411433E-01
   .1354768E-01   .1302372E-01   .1254863E-01   .1215192E-01   .1182938E-01
   .1152132E-01   .1116118E-01   .1067909E-01   .1010181E-01   .9575161E-02
   .9245527E-02   .9162020E-02   .9277910E-02   .9565645E-02   .1005603E-01
   .1073304E-01   .1150220E-01   .1226117E-01   .1297909E-01   .1372192E-01
   .1452569E-01   .1532620E-01   .1605376E-01   .1668903E-01   .1720742E-01
   .1758240E-01   .1780007E-01   .1791316E-01   .1802969E-01   .1822463E-01
   .1848801E-01   .1876712E-01   .1901432E-01   .1916665E-01   .1918851E-01
   .1911056E-01   .1897345E-01   .1885964E-01   .1885898E-01   .1895694E-01
   .1904974E-01   .1905961E-01   .1899055E-01   .1885687E-01   .1864015E-01
   .1835749E-01   .1799958E-01   .1755745E-01   .1703040E-01   .1638693E-01
   .1555710E-01   .1447626E-01   .1309573E-01   .1140513E-01   .9413332E-02
   .7190545E-02   .4897910E-02   .2715268E-02   .7386006E-03  -.1051251E-02
  -.2690911E-02  -.4182052E-02  -.5498724E-02  -.6603059E-02  -.7514953E-02
  -.8277759E-02  -.8917450E-02  -.9430304E-02  -.9802529E-02  -.1003853E-01
  -.1017771E-01  -.1028721E-01  -.1041899E-01  -.1063553E-01  -.1099714E-01
  -.1152364E-01  -.1221676E-01  -.1302254E-01  -.1381765E-01  -.1453576E-01
  -.1522147E-01  -.1594316E-01  -.1677074E-01  -.1772351E-01  -.1879570E-01
  -.1999022E-01  -.2132214E-01  -.2276032E-01  -.2423839E-01  -.2571020E-01
  -.2714347E-01  -.2852742E-01  -.2995337E-01  -.3151564E-01  -.3319623E-01
  -.3489869E-01  -.3654119E-01  -.3808363E-01  -.3950690E-01  -.4074273E-01
  -.4176075E-01  -.4258614E-01  -.4326543E-01  -.4384427E-01  -.4429636E-01
  -.4453134E-01  -.4450227E-01  -.4426090E-01  -.4388946E-01  -.4342874E-01
  -.4289266E-01  -.4231713E-01  -.4169797E-01  -.4093842E-01  -.3996518E-01
  -.3874190E-01  -.3726775E-01  -.3561217E-01  -.3386360E-01  -.3210669E-01
  -.3040666E-01  -.2875363E-01  -.2710454E-01  -.2545056E-01  -.2383129E-01
  -.2235182E-01  -.2116013E-01  -.2035092E-01  -.1991968E-01  -.1977214E-01
  -.1976378E-01  -.1979332E-01  -.1980111E-01  -.1975407E-01  -.1967869E-01
  -.1966697E-01  -.1984207E-01  -.2025916E-01  -.2085139E-01  -.2151466E-01
  -.2211960E-01  -.2255452E-01  -.2280467E-01  -.2297634E-01  -.2316144E-01
  -.2340442E-01  -.2374384E-01  -.2417844E-01  -.2464032E-01  -.2505128E-01
  -.2532676E-01  -.2546885E-01  -.2559484E-01  -.2576678E-01  -.2599714E-01
  -.2625069E-01  -.2647622E-01  -.2666727E-01  -.2681330E-01  -.2688719E-01
  -.2683469E-01  -.2659999E-01  -.2618107E-01  -.2560747E-01  -.2487348E-01
  -.2398745E-01  -.2299519E-01  -.2196627E-01  -.2098598E-01  -.2005704E-01
  -.1910652E-01  -.1813623E-01  -.1718820E-01  -.1628234E-01  -.1543980E-01
  -.1468273E-01  -.1402576E-01  -.1346392E-01  -.1297669E-01  -.1255061E-01
  -.1221269E-01  -.1204633E-01  -.1211751E-01  -.1242067E-01  -.1290344E-01
  -.1348790E-01  -.1410735E-01  -.1470624E-01  -.1521437E-01  -.1557247E-01
  -.1577549E-01  -.1592236E-01  -.1611623E-01  -.1634650E-01  -.1654965E-01
  -.1667062E-01  -.1668897E-01  -.1654946E-01  -.1614697E-01  -.1549443E-01
  -.1470998E-01  -.1389583E-01  -.1315719E-01  -.1253266E-01  -.1198187E-01
  -.1144290E-01  -.1087426E-01  -.1026999E-01  -.9652668E-02  -.9047909E-02
  -.8494014E-02  -.8028209E-02  -.7676743E-02  -.7413425E-02  -.7196620E-02
  -.6989011E-02  -.6768523E-02  -.6530243E-02  -.6270429E-02  -.5986426E-02
  -.5693114E-02  -.5418814E-02  -.5169241E-02  -.4858011E-02  -.4323530E-02
  -.3478861E-02  -.2362205E-02  -.1084976E-02   .2447460E-03   .1540977E-02
   .2746931E-02   .3827241E-02   .4779142E-02   .5611667E-02   .6280327E-02
   .6676553E-02   .6743780E-02   .6499935E-02   .5961888E-02   .5127029E-02
   .4009424E-02   .2725102E-02   .1384445E-02   .1684537E-04  -.1376437E-02
  -.2760354E-02  -.4042931E-02  -.5224457E-02  -.6349956E-02  -.7448091E-02
  -.8526103E-02  -.9596499E-02  -.1065619E-01  -.1169091E-01  -.1270961E-01
  -.1370851E-01  -.1465375E-01  -.1548451E-01  -.1620691E-01  -.1682160E-01
  -.1724166E-01  -.1736846E-01  -.1714335E-01  -.1656459E-01  -.1561757E-01
  -.1423599E-01  -.1234347E-01  -.9919755E-02  -.7006779E-02  -.3674546E-02
  -.7217498E-04   .3594986E-02   .7150580E-02   .1043625E-01   .1332915E-01
   .1578891E-01   .1778302E-01   .1928817E-01   .2045109E-01   .2150110E-01
   .2256814E-01   .2357050E-01   .2439086E-01   .2509672E-01   .2590519E-01
   .2703111E-01   .2852411E-01   .3032073E-01   .3234419E-01   .3448406E-01
   .3665577E-01   .3882076E-01   .4096708E-01   .4301705E-01   .4484237E-01
   .4633460E-01   .4743601E-01   .4809574E-01   .4827645E-01   .4794646E-01
   .4706545E-01   .4561971E-01   .4371250E-01   .4157169E-01   .3942887E-01
   .3741181E-01   .3554276E-01   .3385675E-01   .3239331E-01   .3110935E-01
   .2994669E-01   .2891942E-01   .2804715E-01   .2729722E-01   .2663862E-01
   .2606739E-01   .2549901E-01   .2481543E-01   .2395271E-01   .2285627E-01
   .2150063E-01   .1989862E-01   .1809159E-01   .1611409E-01   .1393093E-01
   .1148437E-01   .8864812E-02   .6266549E-02   .3777704E-02   .1323726E-02
  -.1190318E-02  -.3758042E-02  -.6294492E-02  -.8736199E-02  -.1105752E-01
  -.1325233E-01  -.1533940E-01  -.1728366E-01  -.1898843E-01  -.2037958E-01
  -.2141632E-01  -.2207617E-01  -.2234866E-01  -.2221555E-01  -.2167139E-01
  -.2071937E-01  -.1944529E-01  -.1799621E-01  -.1644739E-01  -.1478098E-01
  -.1300896E-01  -.1124653E-01  -.9604957E-02  -.8091963E-02  -.6643774E-02
  -.5237714E-02  -.3932028E-02  -.2782745E-02  -.1784657E-02  -.9183070E-03
  -.1419470E-03   .5894438E-03   .1274631E-02   .1904377E-02   .2484868E-02
   .2978706E-02   .3323235E-02   .3481723E-02   .3468433E-02   .3368858E-02
   .3241237E-02   .3075023E-02   .2806729E-02   .2371816E-02   .1810325E-02
   .1210616E-02   .6363493E-03   .1356434E-03  -.2491661E-03  -.4868678E-03
  -.5917780E-03  -.6370915E-03  -.7191894E-03  -.8851679E-03  -.1142769E-02
  -.1512448E-02  -.2005017E-02  -.2627609E-02  -.3429081E-02  -.4421566E-02
  -.5565247E-02  -.6823262E-02  -.8166419E-02  -.9548148E-02  -.1089014E-01
  -.1210349E-01  -.1308770E-01  -.1377823E-01  -.1416570E-01  -.1422120E-01
  -.1391598E-01  -.1326094E-01  -.1222243E-01  -.1076255E-01  -.8976992E-02
  -.7069866E-02  -.5167143E-02  -.3301444E-02  -.1509720E-02   .1625983E-03
   .1734361E-02   .3249297E-02   .4786835E-02   .6400969E-02   .8042994E-02
   .9582172E-02   .1093912E-01   .1211572E-01   .1311179E-01   .1384348E-01
   .1423405E-01   .1423527E-01   .1381013E-01   .1297810E-01   .1179003E-01
   .1029386E-01   .8554249E-02   .6687878E-02   .4839345E-02   .3130929E-02
   .1590260E-02   .2044892E-03  -.1018083E-02  -.2076032E-02  -.3016027E-02
  -.3917735E-02  -.4820061E-02  -.5732979E-02  -.6658898E-02  -.7614375E-02
  -.8605330E-02  -.9581409E-02  -.1046549E-01  -.1117024E-01  -.1163585E-01
  -.1183894E-01  -.1181508E-01  -.1167889E-01  -.1150290E-01  -.1128851E-01
  -.1099372E-01  -.1056436E-01  -.9940302E-02  -.9067826E-02  -.8016985E-02
  -.6940993E-02  -.5933830E-02  -.5021170E-02  -.4228201E-02  -.3558406E-02
  -.2919903E-02  -.2236207E-02  -.1523963E-02  -.8268343E-03  -.1603848E-03
   .4780500E-03   .1080425E-02   .1591916E-02   .1967749E-02   .2220368E-02
   .2373743E-02   .2459998E-02   .2462959E-02   .2288269E-02   .1894426E-02
   .1320742E-02   .6438617E-03  -.7975974E-04  -.8514302E-03  -.1691272E-02
  -.2607591E-02  -.3526916E-02  -.4337066E-02  -.4950200E-02  -.5302841E-02
  -.5347315E-02  -.5039519E-02  -.4351867E-02  -.3255794E-02  -.1759934E-02
   .1045995E-03   .2330546E-02   .4923873E-02   .7809785E-02   .1079566E-01
   .1362732E-01   .1604711E-01   .1797343E-01   .1960006E-01   .2119726E-01
   .2290493E-01   .2465410E-01   .2631069E-01   .2779617E-01   .2906279E-01
   .3009381E-01   .3090154E-01   .3148774E-01   .3187314E-01   .3213517E-01
   .3233379E-01   .3247758E-01   .3259741E-01   .3269927E-01   .3272456E-01
   .3262102E-01   .3242113E-01   .3222762E-01   .3209604E-01   .3200679E-01
   .3192145E-01   .3185673E-01   .3183929E-01   .3186463E-01   .3191417E-01
   .3198748E-01   .3209939E-01   .3222779E-01   .3230801E-01   .3230748E-01
   .3223011E-01   .3205207E-01   .3176023E-01   .3139344E-01   .3100817E-01
   .3060477E-01   .3016018E-01   .2969436E-01   .2929162E-01   .2897704E-01
   .2869983E-01   .2839148E-01   .2800890E-01   .2755386E-01   .2700820E-01
   .2636537E-01   .2565436E-01   .2485379E-01   .2387712E-01   .2265203E-01
   .2112607E-01   .1926782E-01   .1702398E-01   .1432532E-01   .1111350E-01
   .7446644E-02   .3648048E-02   .1757611E-03  -.2730201E-02  -.5201704E-02
  -.7488410E-02  -.9665952E-02  -.1165577E-01  -.1333728E-01  -.1469155E-01
  -.1580880E-01  -.1676476E-01  -.1756308E-01  -.1820787E-01  -.1871231E-01
  -.1912098E-01  -.1951311E-01  -.1989652E-01  -.2022005E-01  -.2041012E-01
  -.2042039E-01  -.2023403E-01  -.1986930E-01  -.1935147E-01  -.1867299E-01
  -.1785993E-01  -.1699536E-01  -.1617059E-01  -.1545156E-01  -.1486840E-01
  -.1438845E-01  -.1396960E-01  -.1356946E-01  -.1315604E-01  -.1270684E-01
  -.1223287E-01  -.1178706E-01  -.1143895E-01  -.1126183E-01  -.1128687E-01
  -.1145647E-01  -.1167866E-01  -.1190404E-01  -.1212812E-01  -.1232453E-01
  -.1242331E-01  -.1229359E-01  -.1191823E-01  -.1138967E-01  -.1075984E-01
  -.1001491E-01  -.9152533E-02  -.8207202E-02  -.7239366E-02  -.6324478E-02
  -.5557270E-02  -.5025717E-02  -.4733266E-02  -.4645376E-02  -.4739658E-02
  -.5004385E-02  -.5353068E-02  -.5646637E-02  -.5835165E-02  -.5871276E-02
  -.5695904E-02  -.5312746E-02  -.4745336E-02  -.4005137E-02  -.3119938E-02
  -.2125957E-02  -.1040150E-02   .1004085E-03   .1206799E-02   .2202242E-02
   .3022950E-02   .3610811E-02   .3965881E-02   .4189390E-02   .4448377E-02
   .4862769E-02   .5507824E-02   .6403005E-02   .7455064E-02   .8576848E-02
   .9774336E-02   .1109295E-01   .1247389E-01   .1380892E-01   .1510134E-01
   .1643353E-01   .1783513E-01   .1921787E-01   .2042345E-01   .2133424E-01
   .2190362E-01   .2212923E-01   .2203915E-01   .2162560E-01   .2091308E-01
   .1997402E-01   .1886306E-01   .1762596E-01   .1636293E-01   .1516946E-01
   .1407491E-01   .1309114E-01   .1223973E-01   .1155601E-01   .1109536E-01
   .1090710E-01   .1098075E-01   .1117381E-01   .1133247E-01   .1140347E-01
   .1146549E-01   .1161668E-01   .1187062E-01   .1219077E-01   .1255651E-01
   .1298249E-01   .1346011E-01   .1396534E-01   .1449207E-01   .1502800E-01
   .1554974E-01   .1602123E-01   .1638089E-01   .1660249E-01   .1670940E-01
   .1676577E-01   .1679734E-01   .1678487E-01   .1671126E-01   .1658559E-01
   .1645128E-01   .1630212E-01   .1605143E-01   .1558006E-01   .1484140E-01
   .1387001E-01   .1270512E-01   .1136432E-01   .9888677E-02   .8308219E-02
   .6694126E-02   .5197458E-02   .3911972E-02   .2752733E-02   .1596745E-02
   .4331516E-03  -.6756938E-03  -.1671423E-02  -.2534415E-02  -.3265795E-02
  -.3851068E-02  -.4243285E-02  -.4398261E-02  -.4313388E-02  -.4000818E-02
  -.3459978E-02  -.2722615E-02  -.1812092E-02  -.7647766E-03   .3736981E-03
   .1559427E-02   .2772398E-02   .3992860E-02   .5160902E-02   .6229767E-02
   .7245154E-02   .8258214E-02   .9299986E-02   .1042299E-01   .1165035E-01
   .1297671E-01   .1440975E-01   .1592861E-01   .1744122E-01   .1884939E-01
   .2013862E-01   .2133164E-01   .2240427E-01   .2331272E-01   .2401237E-01
   .2450721E-01   .2479617E-01   .2485285E-01   .2469146E-01   .2432147E-01
   .2374155E-01   .2296026E-01   .2201228E-01   .2090521E-01   .1959056E-01
   .1804994E-01   .1632453E-01   .1441550E-01   .1223362E-01   .9639712E-02
   .6536728E-02   .3049474E-02  -.4572613E-03  -.3672041E-02  -.6538813E-02
  -.9185877E-02  -.1170130E-01  -.1400852E-01  -.1591897E-01  -.1733936E-01
  -.1832966E-01  -.1893868E-01  -.1915259E-01  -.1897182E-01  -.1847811E-01
  -.1778402E-01  -.1692359E-01  -.1591469E-01  -.1479874E-01  -.1362788E-01
  -.1241471E-01  -.1117840E-01  -.9997257E-02  -.8901831E-02  -.7903895E-02
  -.7034441E-02  -.6327729E-02  -.5800063E-02  -.5486308E-02  -.5381283E-02
  -.5450391E-02  -.5733764E-02  -.6272102E-02  -.7042317E-02  -.7994677E-02
  -.9046599E-02  -.1010542E-01  -.1114163E-01  -.1219828E-01  -.1327022E-01
  -.1432723E-01  -.1535390E-01  -.1627043E-01  -.1700778E-01  -.1759413E-01
  -.1811231E-01  -.1864144E-01  -.1921775E-01  -.1980937E-01  -.2039940E-01
  -.2101307E-01  -.2163570E-01  -.2220513E-01  -.2266052E-01  -.2296741E-01
  -.2313597E-01  -.2320638E-01  -.2322180E-01  -.2315687E-01  -.2296020E-01
  -.2258482E-01  -.2202779E-01  -.2135897E-01  -.2059070E-01  -.1965271E-01
  -.1853692E-01  -.1731588E-01  -.1602658E-01  -.1465951E-01  -.1322461E-01
  -.1174024E-01  -.1018884E-01  -.8568050E-02  -.6867911E-02  -.5005732E-02
  -.2985504E-02  -.9656265E-03   .9069422E-03   .2555922E-02   .3961853E-02
   .5089229E-02   .5864727E-02   .6236717E-02   .6226675E-02   .5873441E-02
   .5195705E-02   .4218375E-02   .2967488E-02   .1492851E-02  -.9250628E-04
  -.1663115E-02  -.3139502E-02  -.4482417E-02  -.5654304E-02  -.6626437E-02
  -.7410634E-02  -.8038426E-02  -.8542142E-02  -.8930379E-02  -.9200544E-02
  -.9345113E-02  -.9369094E-02  -.9285490E-02  -.9094213E-02  -.8799172E-02
  -.8465945E-02  -.8184047E-02  -.7981094E-02  -.7833724E-02  -.7726465E-02
  -.7661401E-02  -.7618613E-02  -.7562065E-02  -.7458035E-02  -.7286119E-02
  -.7073338E-02  -.6834734E-02  -.6576298E-02  -.6322087E-02  -.6068743E-02
  -.5801226E-02  -.5514954E-02  -.5234242E-02  -.5017705E-02  -.4927115E-02
  -.5027538E-02  -.5391165E-02  -.6004450E-02  -.6732462E-02  -.7477172E-02
  -.8191038E-02  -.8822391E-02  -.9345092E-02  -.9772500E-02  -.1011483E-01
  -.1036060E-01  -.1049122E-01  -.1047517E-01  -.1033851E-01  -.1013128E-01
  -.9889550E-02  -.9676037E-02  -.9590553E-02  -.9719735E-02  -.1003534E-01
  -.1045189E-01  -.1091594E-01  -.1141773E-01  -.1191009E-01  -.1230457E-01
  -.1253554E-01  -.1256068E-01  -.1236885E-01  -.1195895E-01  -.1134494E-01
  -.1056718E-01  -.9716853E-02  -.8914569E-02  -.8237268E-02  -.7726588E-02
  -.7404045E-02  -.7263505E-02  -.7296540E-02  -.7476078E-02  -.7757526E-02
  -.8117017E-02  -.8493640E-02  -.8806924E-02  -.9021871E-02  -.9107690E-02
  -.9061474E-02  -.8930902E-02  -.8768372E-02  -.8572720E-02  -.8320210E-02
  -.8034384E-02  -.7732990E-02  -.7423877E-02  -.7099367E-02  -.6784990E-02
  -.6613636E-02  -.6706374E-02  -.7090364E-02  -.7735674E-02  -.8591868E-02
  -.9615264E-02  -.1078836E-01  -.1207010E-01  -.1340879E-01  -.1477284E-01
  -.1613752E-01  -.1744017E-01  -.1857373E-01  -.1952232E-01  -.2031338E-01
  -.2092483E-01  -.2133873E-01  -.2157757E-01  -.2165236E-01  -.2153306E-01
  -.2116985E-01  -.2057981E-01  -.1981701E-01  -.1896175E-01  -.1811537E-01
  -.1736069E-01  -.1676309E-01  -.1631434E-01  -.1596903E-01  -.1571268E-01
  -.1558391E-01  -.1560014E-01  -.1573029E-01  -.1599594E-01  -.1641271E-01
  -.1699664E-01  -.1775719E-01  -.1864832E-01  -.1960960E-01  -.2055435E-01
  -.2142852E-01  -.2223544E-01  -.2298129E-01  -.2365960E-01  -.2423390E-01
  -.2468442E-01  -.2501842E-01  -.2526721E-01  -.2546583E-01  -.2561542E-01
  -.2567249E-01  -.2561139E-01  -.2546602E-01  -.2526740E-01  -.2501297E-01
  -.2467171E-01  -.2416887E-01  -.2347967E-01  -.2266189E-01  -.2180053E-01
  -.2096569E-01  -.2016430E-01  -.1934183E-01  -.1850502E-01  -.1770245E-01
  -.1693445E-01  -.1615650E-01  -.1533487E-01  -.1447263E-01  -.1359355E-01
  -.1266910E-01  -.1159469E-01  -.1027512E-01  -.8666132E-02  -.6748512E-02
  -.4605532E-02  -.2363378E-02  -.8927576E-04   .2159988E-02   .4306537E-02
   .6302960E-02   .8155684E-02   .9922513E-02   .1163653E-01   .1322868E-01
   .1457455E-01   .1559646E-01   .1633558E-01   .1692861E-01   .1748802E-01
   .1800985E-01   .1841692E-01   .1865631E-01   .1867815E-01   .1841810E-01
   .1786332E-01   .1705657E-01   .1597097E-01   .1452902E-01   .1274992E-01
   .1087289E-01   .9220937E-02   .7902441E-02   .6803887E-02   .5812417E-02
   .4946490E-02   .4313431E-02   .3958055E-02   .3821879E-02   .3836011E-02
   .4014153E-02   .4391122E-02   .4891740E-02   .5403874E-02   .5894599E-02
   .6370237E-02   .6810268E-02   .7195058E-02   .7488080E-02   .7657128E-02
   .7688821E-02   .7542308E-02   .7174048E-02   .6595877E-02   .5886852E-02
   .5130519E-02   .4409544E-02   .3769577E-02   .3155540E-02   .2531555E-02
   .1963955E-02   .1473262E-02   .1013655E-02   .5675785E-03   .1383682E-03
  -.2446734E-03  -.5856836E-03  -.8951139E-03  -.1154296E-02  -.1335692E-02
  -.1474502E-02  -.1607574E-02  -.1707009E-02  -.1738340E-02  -.1665432E-02
  -.1517548E-02  -.1337990E-02  -.1111928E-02  -.8717818E-03  -.6810057E-03
  -.5467384E-03  -.4607416E-03  -.4233708E-03  -.4648240E-03  -.5914423E-03
  -.7629005E-03  -.9371125E-03  -.1138307E-02  -.1424785E-02  -.1809702E-02
  -.2238580E-02  -.2604104E-02  -.2822223E-02  -.2875364E-02  -.2784545E-02
  -.2592661E-02  -.2348770E-02  -.2140766E-02  -.2059718E-02  -.2158868E-02
  -.2446996E-02  -.2922455E-02  -.3586763E-02  -.4432126E-02  -.5455539E-02
  -.6604593E-02  -.7840100E-02  -.9179329E-02  -.1063180E-01  -.1217170E-01
  -.1375172E-01  -.1529266E-01  -.1672777E-01  -.1806568E-01  -.1937853E-01
  -.2070631E-01  -.2208978E-01  -.2353659E-01  -.2496469E-01  -.2630693E-01
  -.2753122E-01  -.2859460E-01  -.2946529E-01  -.3013197E-01  -.3058428E-01
  -.3078966E-01  -.3074037E-01  -.3044002E-01  -.2986507E-01  -.2902795E-01
  -.2799861E-01  -.2687413E-01  -.2572692E-01  -.2458810E-01  -.2343298E-01
  -.2222236E-01  -.2095728E-01  -.1963517E-01  -.1828495E-01  -.1695628E-01
  -.1568300E-01  -.1444763E-01  -.1319326E-01  -.1188503E-01  -.1050951E-01
  -.9061720E-02  -.7546138E-02  -.5974368E-02  -.4367759E-02  -.2726264E-02
  -.1024709E-02   .7163621E-03   .2518434E-02   .4407360E-02   .6340699E-02
   .8222100E-02   .9981336E-02   .1162382E-01   .1317251E-01   .1462400E-01
   .1593634E-01   .1702582E-01   .1788533E-01   .1860886E-01   .1925275E-01
   .1980394E-01   .2023781E-01   .2049596E-01   .2055205E-01   .2041644E-01
   .2006470E-01   .1944108E-01   .1847137E-01   .1712355E-01   .1539255E-01
   .1331694E-01   .1106498E-01   .8836247E-02   .6685086E-02   .4554173E-02
   .2407452E-02   .3090628E-03  -.1707543E-02  -.3649819E-02  -.5470980E-02
  -.7184421E-02  -.8840206E-02  -.1042779E-01  -.1190214E-01  -.1324285E-01
  -.1443058E-01  -.1543061E-01  -.1620633E-01  -.1675028E-01  -.1710255E-01
  -.1722779E-01  -.1707788E-01  -.1674806E-01  -.1635562E-01  -.1589153E-01
  -.1526878E-01  -.1442782E-01  -.1336805E-01  -.1213939E-01  -.1079320E-01
  -.9366155E-02  -.7887564E-02  -.6415459E-02  -.4994539E-02  -.3610831E-02
  -.2205130E-02  -.7697177E-03   .6795621E-03   .2155108E-02   .3582794E-02
   .4801481E-02   .5689395E-02   .6194321E-02   .6334754E-02   .6163998E-02
   .5731549E-02   .5134701E-02   .4471035E-02   .3775816E-02   .3055366E-02
   .2332506E-02   .1617690E-02   .9071277E-03   .2273791E-03  -.3700141E-03
  -.8059956E-03  -.9901229E-03  -.9153067E-03  -.6541411E-03  -.3175992E-03
   .3782529E-04   .4080239E-03   .7724530E-03   .1047054E-02   .1134806E-02
   .9925479E-03   .6171632E-03   .4551533E-04  -.6856781E-03  -.1548785E-02
  -.2515310E-02  -.3539772E-02  -.4555346E-02  -.5507545E-02  -.6379967E-02
  -.7168607E-02  -.7815064E-02  -.8250502E-02  -.8474311E-02  -.8533337E-02
  -.8475193E-02  -.8303036E-02  -.7983602E-02  -.7519861E-02  -.6949921E-02
  -.6279812E-02  -.5522315E-02  -.4722741E-02  -.3925538E-02  -.3131454E-02
  -.2348651E-02  -.1624169E-02  -.9596016E-03  -.2966817E-03   .3877632E-03
   .1034238E-02   .1559228E-02   .1911293E-02   .2070340E-02   .2054239E-02
   .1963707E-02   .1838590E-02   .1723251E-02   .1673761E-02   .1665310E-02
   .1643859E-02   .1601077E-02   .1559294E-02   .1552557E-02   .1592098E-02
   .1645342E-02   .1675482E-02   .1633041E-02   .1495733E-02   .1237957E-02
   .8018509E-03   .1632132E-03  -.6224992E-03  -.1426260E-02  -.2154169E-02
  -.2786225E-02  -.3378410E-02  -.3985287E-02  -.4550338E-02  -.4963799E-02
  -.5148641E-02  -.5058544E-02  -.4664132E-02  -.3988164E-02  -.3052261E-02
  -.1852167E-02  -.4481265E-03   .1076357E-02   .2709703E-02   .4428245E-02
   .6184830E-02   .7909087E-02   .9518267E-02   .1094313E-01   .1213101E-01
   .1310574E-01   .1390266E-01   .1458654E-01   .1522096E-01   .1583721E-01
   .1643672E-01   .1698029E-01   .1738240E-01   .1761171E-01   .1776965E-01
   .1797329E-01   .1825601E-01   .1860790E-01   .1900043E-01   .1943468E-01
   .1988933E-01   .2031819E-01   .2071926E-01   .2111353E-01   .2152229E-01
   .2195268E-01   .2239123E-01   .2280581E-01   .2316371E-01   .2345477E-01
   .2369368E-01   .2388844E-01   .2404433E-01   .2415192E-01   .2421167E-01
   .2419078E-01   .2405106E-01   .2377428E-01   .2334376E-01   .2275058E-01
   .2198487E-01   .2106705E-01   .2005353E-01   .1898979E-01   .1788932E-01
   .1674042E-01   .1548242E-01   .1410570E-01   .1275997E-01   .1162556E-01
   .1076825E-01   .1015546E-01   .9682029E-02   .9241728E-02   .8791149E-02
   .8334155E-02   .7887069E-02   .7463742E-02   .7043266E-02   .6596662E-02
   .6186367E-02   .5792571E-02   .5285000E-02   .4590240E-02   .3725506E-02
   .2782357E-02   .1830082E-02   .8749276E-03  -.9836191E-04  -.1084076E-02
  -.2000945E-02  -.2783314E-02  -.3457296E-02  -.4084188E-02  -.4663004E-02
  -.5147342E-02  -.5521918E-02  -.5845474E-02  -.6170165E-02  -.6518129E-02
  -.6928553E-02  -.7409163E-02  -.7940971E-02  -.8537021E-02  -.9183827E-02
  -.9791977E-02  -.1029940E-01  -.1073275E-01  -.1114626E-01  -.1156175E-01
  -.1192197E-01  -.1215478E-01  -.1225475E-01  -.1228357E-01  -.1226634E-01
  -.1216060E-01  -.1193532E-01  -.1158927E-01  -.1111927E-01  -.1052407E-01
  -.9810241E-02  -.9027906E-02  -.8265187E-02  -.7575284E-02  -.6926970E-02
  -.6247248E-02  -.5512393E-02  -.4771915E-02  -.4086720E-02  -.3474493E-02
  -.2941897E-02  -.2501918E-02  -.2177281E-02  -.1918246E-02  -.1704681E-02
  -.1577556E-02  -.1562729E-02  -.1666252E-02  -.1930205E-02  -.2366049E-02
  -.2917247E-02  -.3556318E-02  -.4282671E-02  -.5051814E-02  -.5878836E-02
  -.6750487E-02  -.7578662E-02  -.8332000E-02  -.9020773E-02  -.9588923E-02
  -.9994528E-02  -.1029622E-01  -.1056652E-01  -.1078887E-01  -.1086439E-01
  -.1078525E-01  -.1067090E-01  -.1058779E-01  -.1051887E-01  -.1044843E-01
  -.1035952E-01  -.1026404E-01  -.1022000E-01  -.1024203E-01  -.1029799E-01
  -.1033813E-01  -.1032535E-01  -.1023304E-01  -.1001487E-01  -.9630183E-02
  -.9087302E-02  -.8422485E-02  -.7705433E-02  -.7019677E-02  -.6370392E-02
  -.5741980E-02  -.5159181E-02  -.4669249E-02  -.4245802E-02  -.3872831E-02
  -.3599985E-02  -.3491371E-02  -.3561977E-02  -.3796129E-02  -.4162915E-02
  -.4624482E-02  -.5175658E-02  -.5814961E-02  -.6535553E-02  -.7330061E-02
  -.8204191E-02  -.9213894E-02  -.1038521E-01  -.1164345E-01  -.1289874E-01
  -.1410407E-01  -.1524152E-01  -.1631921E-01  -.1732660E-01  -.1827175E-01
  -.1918356E-01  -.2010508E-01  -.2106276E-01  -.2202403E-01  -.2290974E-01
  -.2366380E-01  -.2432730E-01  -.2491560E-01  -.2538984E-01  -.2571146E-01
  -.2588921E-01  -.2593452E-01  -.2584877E-01  -.2566956E-01  -.2541323E-01
  -.2505786E-01  -.2454376E-01  -.2387262E-01  -.2311839E-01  -.2232419E-01
  -.2149949E-01  -.2066849E-01  -.1986819E-01  -.1912721E-01  -.1844580E-01
  -.1783766E-01  -.1732261E-01  -.1695312E-01  -.1676210E-01  -.1670848E-01
  -.1673265E-01  -.1678512E-01  -.1686202E-01  -.1695823E-01  -.1699509E-01
  -.1692791E-01  -.1678922E-01  -.1663571E-01  -.1649808E-01  -.1639011E-01
  -.1630057E-01  -.1619258E-01  -.1605448E-01  -.1587481E-01  -.1560565E-01
  -.1518583E-01  -.1462010E-01  -.1393064E-01  -.1313795E-01  -.1221547E-01
  -.1112193E-01  -.9908697E-02  -.8650885E-02  -.7385310E-02  -.6115908E-02
  -.4848089E-02  -.3595610E-02  -.2371506E-02  -.1203057E-02  -.5770488E-04
   .1137357E-02   .2389272E-02   .3648964E-02   .4900910E-02   .6176495E-02
   .7505629E-02   .8919484E-02   .1041746E-01   .1190251E-01   .1327859E-01
   .1451184E-01   .1557026E-01   .1643379E-01   .1712727E-01   .1769943E-01
   .1820141E-01   .1864559E-01   .1899482E-01   .1920791E-01   .1931009E-01
   .1933278E-01   .1927395E-01   .1916406E-01   .1903152E-01   .1886848E-01
   .1867119E-01   .1841320E-01   .1805207E-01   .1758177E-01   .1699285E-01
   .1626138E-01   .1538625E-01   .1440751E-01   .1337601E-01   .1230055E-01
   .1117463E-01   .9961578E-02   .8670367E-02   .7324072E-02   .5946762E-02
   .4527556E-02   .3032763E-02   .1450372E-02  -.1835155E-03  -.1771527E-02
  -.3231284E-02  -.4540048E-02  -.5725664E-02  -.6782663E-02  -.7688311E-02
  -.8458951E-02  -.9135969E-02  -.9709988E-02  -.1017240E-01  -.1054368E-01
  -.1081836E-01  -.1095932E-01  -.1099545E-01  -.1100186E-01  -.1100887E-01
  -.1102709E-01  -.1108702E-01  -.1119208E-01  -.1130726E-01  -.1139820E-01
  -.1143608E-01  -.1140911E-01  -.1133780E-01  -.1130677E-01  -.1131755E-01
  -.1132935E-01  -.1137699E-01  -.1150272E-01  -.1164752E-01  -.1170388E-01
  -.1162992E-01  -.1145904E-01  -.1117100E-01  -.1073940E-01  -.1018970E-01
  -.9546152E-02  -.8796360E-02  -.7888120E-02  -.6810191E-02  -.5639258E-02
  -.4429305E-02  -.3239596E-02  -.2139823E-02  -.1177235E-02  -.3893272E-03
   .2066379E-03   .6604230E-03   .1038453E-02   .1367673E-02   .1577284E-02
   .1571005E-02   .1369035E-02   .1106569E-02   .9150816E-03   .8654582E-03
   .1016316E-02   .1384354E-02   .1924594E-02   .2517556E-02   .3111844E-02
   .3769498E-02   .4537230E-02   .5386920E-02   .6216728E-02   .6970829E-02
   .7656415E-02   .8258472E-02   .8721356E-02   .9026052E-02   .9186982E-02
   .9253243E-02   .9316992E-02   .9429752E-02   .9584041E-02   .9760209E-02
   .9976283E-02   .1025615E-01   .1056204E-01   .1085637E-01   .1117360E-01
   .1157562E-01   .1208465E-01   .1266973E-01   .1333281E-01   .1405975E-01
   .1478413E-01   .1545841E-01   .1604252E-01   .1652528E-01   .1692180E-01
   .1721410E-01   .1738574E-01   .1743401E-01   .1734347E-01   .1707021E-01
   .1660731E-01   .1599455E-01   .1524076E-01   .1433754E-01   .1332822E-01
   .1228860E-01   .1125678E-01   .1024281E-01   .9265988E-02   .8346028E-02
   .7488898E-02   .6735993E-02   .6153678E-02   .5756508E-02   .5493386E-02
   .5309887E-02   .5170939E-02   .5045500E-02   .4893129E-02   .4668625E-02
   .4369837E-02   .4025026E-02   .3612307E-02   .3101366E-02   .2502060E-02
   .1835094E-02   .1137015E-02   .4474044E-03  -.2210416E-03  -.8716863E-03
  -.1486677E-02  -.2032626E-02  -.2442389E-02  -.2660133E-02  -.2676977E-02
  -.2490959E-02  -.2085180E-02  -.1467336E-02  -.7054885E-03   .1371817E-03
   .1010385E-02   .1866122E-02   .2675009E-02   .3380186E-02   .3994025E-02
   .4618989E-02   .5310946E-02   .6007010E-02   .6605285E-02   .7083479E-02
   .7467153E-02   .7757431E-02   .7974011E-02   .8174901E-02   .8414046E-02
   .8689971E-02   .8919286E-02   .9022448E-02   .9012672E-02   .8914532E-02
   .8724622E-02   .8468468E-02   .8202502E-02   .7932532E-02   .7596564E-02
   .7161846E-02   .6684315E-02   .6221633E-02   .5793367E-02   .5391019E-02
   .5024308E-02   .4738828E-02   .4556215E-02   .4443946E-02   .4370322E-02
   .4374243E-02   .4527415E-02   .4844197E-02   .5281345E-02   .5800394E-02
   .6411624E-02   .7126681E-02   .7901397E-02   .8695314E-02   .9484551E-02
   .1025820E-01   .1106605E-01   .1194486E-01   .1286647E-01   .1378697E-01
   .1465413E-01   .1542293E-01   .1602764E-01   .1642572E-01   .1660434E-01
   .1656317E-01   .1634164E-01   .1604066E-01   .1568187E-01   .1519971E-01
   .1454869E-01   .1374976E-01   .1286232E-01   .1197291E-01   .1118583E-01
   .1059866E-01   .1023515E-01   .1002413E-01   .9874337E-02   .9743834E-02
   .9666242E-02   .9676324E-02   .9755380E-02   .9852795E-02   .9949999E-02
   .1004099E-01   .1012570E-01   .1021426E-01   .1032274E-01   .1048320E-01
   .1066915E-01   .1081897E-01   .1091701E-01   .1100552E-01   .1116483E-01
   .1144381E-01   .1182582E-01   .1226315E-01   .1270357E-01   .1310264E-01
   .1341102E-01   .1363885E-01   .1384962E-01   .1410609E-01   .1443734E-01
   .1484456E-01   .1529407E-01   .1579472E-01   .1633935E-01   .1688023E-01
   .1735463E-01   .1775750E-01   .1814296E-01   .1857522E-01   .1908573E-01
   .1962850E-01   .2011625E-01   .2051904E-01   .2088125E-01   .2119015E-01
   .2137783E-01   .2147131E-01   .2153166E-01   .2153297E-01   .2144971E-01
   .2129051E-01   .2108535E-01   .2084737E-01   .2056030E-01   .2016577E-01
   .1962798E-01   .1902506E-01   .1843241E-01   .1782623E-01   .1717068E-01
   .1647914E-01   .1580169E-01   .1515507E-01   .1456433E-01   .1410633E-01
   .1382333E-01   .1368042E-01   .1361635E-01   .1362562E-01   .1372815E-01
   .1394745E-01   .1424889E-01   .1457935E-01   .1491032E-01   .1526188E-01
   .1565374E-01   .1606973E-01   .1652493E-01   .1706681E-01   .1766511E-01
   .1821982E-01   .1863510E-01   .1888392E-01   .1900911E-01   .1906205E-01
   .1903743E-01   .1892567E-01   .1873241E-01   .1843893E-01   .1804722E-01
   .1758073E-01   .1703891E-01   .1643564E-01   .1582455E-01   .1527417E-01
   .1480661E-01   .1436346E-01   .1393740E-01   .1353592E-01   .1310231E-01
   .1259117E-01   .1195873E-01   .1119974E-01   .1035213E-01   .9444287E-02
   .8483064E-02   .7463125E-02   .6378164E-02   .5220717E-02   .4019383E-02
   .2822650E-02   .1651866E-02   .5139290E-03  -.5190180E-03  -.1345784E-02
  -.1917242E-02  -.2252572E-02  -.2407305E-02  -.2443557E-02  -.2355673E-02
  -.2100069E-02  -.1681252E-02  -.1164576E-02  -.5983913E-03   .1648207E-04
   .6770956E-03   .1365023E-02   .2085080E-02   .2852541E-02   .3663792E-02
   .4493151E-02   .5323837E-02   .6115890E-02   .6864452E-02   .7614501E-02
   .8373527E-02   .9141897E-02   .9884887E-02   .1059154E-01   .1128959E-01
   .1199464E-01   .1269188E-01   .1332687E-01   .1386120E-01   .1429208E-01
   .1467967E-01   .1511814E-01   .1565706E-01   .1624891E-01   .1681654E-01
   .1730235E-01   .1769885E-01   .1802620E-01   .1828111E-01   .1848263E-01
   .1865908E-01   .1882567E-01   .1896226E-01   .1904227E-01   .1909102E-01
   .1911445E-01   .1907521E-01   .1894482E-01   .1870930E-01   .1834837E-01
   .1785637E-01   .1722864E-01   .1645784E-01   .1558910E-01   .1468794E-01
   .1376701E-01   .1278786E-01   .1173466E-01   .1066158E-01   .9708620E-02
   .9007354E-02   .8537617E-02   .8218193E-02   .7990216E-02   .7818393E-02
   .7665227E-02   .7458366E-02   .7133332E-02   .6671788E-02   .6125083E-02
   .5554609E-02   .4985224E-02   .4469781E-02   .4078763E-02   .3849287E-02
   .3736389E-02   .3717789E-02   .3831365E-02   .4117631E-02   .4620761E-02
   .5339216E-02   .6211626E-02   .7138966E-02   .8083179E-02   .9075758E-02
   .1010009E-01   .1104684E-01   .1183235E-01   .1248724E-01   .1311459E-01
   .1377838E-01   .1443826E-01   .1502408E-01   .1553125E-01   .1600069E-01
   .1642701E-01   .1678308E-01   .1706328E-01   .1726501E-01   .1738896E-01
   .1745446E-01   .1745868E-01   .1736622E-01   .1721099E-01   .1708432E-01
   .1699064E-01   .1688274E-01   .1670239E-01   .1645260E-01   .1616508E-01
   .1585561E-01   .1551191E-01   .1512907E-01   .1475288E-01   .1440943E-01
   .1406412E-01   .1368076E-01   .1326938E-01   .1288143E-01   .1256512E-01
   .1229483E-01   .1202486E-01   .1175113E-01   .1147845E-01   .1121211E-01
   .1091259E-01   .1061166E-01   .1035190E-01   .1010813E-01   .9879935E-02
   .9652116E-02   .9416211E-02   .9193155E-02   .8965039E-02   .8727474E-02
   .8533399E-02   .8427814E-02   .8427355E-02   .8524571E-02   .8726477E-02
   .9002001E-02   .9257723E-02   .9489743E-02   .9769734E-02   .1009159E-01
   .1040849E-01   .1070321E-01   .1100037E-01   .1133646E-01   .1169791E-01
   .1203200E-01   .1230670E-01   .1251707E-01   .1270079E-01   .1291909E-01
   .1316096E-01   .1337299E-01   .1353439E-01   .1369833E-01   .1388966E-01
   .1411983E-01   .1440328E-01   .1470322E-01   .1494608E-01   .1511133E-01
   .1526730E-01   .1546579E-01   .1569005E-01   .1590441E-01   .1609936E-01
   .1628484E-01   .1644598E-01   .1652345E-01   .1648031E-01   .1635929E-01
   .1623456E-01   .1610336E-01   .1592451E-01   .1570177E-01   .1542851E-01
   .1504984E-01   .1450579E-01   .1382548E-01   .1310130E-01   .1240254E-01
   .1173303E-01   .1106543E-01   .1037568E-01   .9691589E-02   .9046006E-02
   .8420682E-02   .7790127E-02   .7213268E-02   .6772173E-02   .6529771E-02
   .6513308E-02   .6653326E-02   .6856726E-02   .7094162E-02   .7369299E-02
   .7649893E-02   .7934764E-02   .8242726E-02   .8583853E-02   .8952231E-02
   .9343983E-02   .9725736E-02   .1001193E-01   .1014844E-01   .1018085E-01
   .1017256E-01   .1013200E-01   .1004934E-01   .9916145E-02   .9709339E-02
   .9400661E-02   .9011609E-02   .8598564E-02   .8154526E-02   .7642523E-02
   .7027562E-02   .6272168E-02   .5385924E-02   .4453937E-02   .3537569E-02
   .2529712E-02   .1357813E-02   .1085000E-03  -.1095895E-02  -.2185190E-02
  -.3158114E-02  -.4015446E-02  -.4739561E-02  -.5309968E-02  -.5726500E-02
  -.5959376E-02  -.5991304E-02  -.5827388E-02  -.5475549E-02  -.4937119E-02
  -.4233729E-02  -.3436288E-02  -.2581610E-02  -.1695458E-02  -.8203221E-03
   .6079156E-05   .7619545E-03   .1428376E-02   .1974698E-02   .2365754E-02
   .2628710E-02   .2825550E-02   .2986322E-02   .3097760E-02   .3197130E-02
   .3346155E-02   .3568702E-02   .3834389E-02   .4111928E-02   .4398625E-02
   .4668691E-02   .4904714E-02   .5089675E-02   .5211136E-02   .5271020E-02
   .5247832E-02   .5084247E-02   .4748722E-02   .4238287E-02   .3582838E-02
   .2891319E-02   .2273367E-02   .1762075E-02   .1312970E-02   .8850516E-03
   .4721917E-03   .1075535E-03  -.1931027E-03  -.4217055E-03  -.5362263E-03
  -.5276999E-03  -.3975909E-03  -.1533952E-03   .1134284E-03   .3170636E-03
   .4653066E-03   .6067440E-03   .7556692E-03   .9122261E-03   .1091207E-02
   .1287235E-02   .1480057E-02   .1664000E-02   .1805786E-02   .1863656E-02
   .1840767E-02   .1756898E-02   .1628007E-02   .1455542E-02   .1214760E-02
   .8854538E-03   .4717874E-03  -.3064839E-04  -.6342766E-03  -.1274320E-02
  -.1878195E-02  -.2416709E-02  -.2899911E-02  -.3390095E-02  -.3917742E-02
  -.4461768E-02  -.4987229E-02  -.5484291E-02  -.5976031E-02  -.6455304E-02
  -.6875586E-02  -.7201384E-02  -.7452797E-02  -.7650947E-02  -.7810845E-02
  -.7937896E-02  -.8017229E-02  -.8067428E-02  -.8128062E-02  -.8220803E-02
  -.8287197E-02  -.8249085E-02  -.8102164E-02  -.7865447E-02  -.7540766E-02
  -.7115139E-02  -.6576123E-02  -.5939288E-02  -.5244786E-02  -.4520916E-02
  -.3804069E-02  -.3096392E-02  -.2401813E-02  -.1794159E-02  -.1366911E-02
  -.1130541E-02  -.1060326E-02  -.1129624E-02  -.1304442E-02  -.1571647E-02
  -.1904845E-02  -.2263121E-02  -.2612384E-02  -.2952862E-02  -.3300559E-02
  -.3649629E-02  -.3985297E-02  -.4270782E-02  -.4476134E-02  -.4608022E-02
  -.4738364E-02  -.4931179E-02  -.5163485E-02  -.5378040E-02  -.5560178E-02
  -.5747479E-02  -.5960345E-02  -.6135519E-02  -.6189890E-02  -.6116547E-02
  -.5941803E-02  -.5685290E-02  -.5365520E-02  -.4979199E-02  -.4513578E-02
  -.3908771E-02  -.3171091E-02  -.2419231E-02  -.1726580E-02  -.1097849E-02
  -.5408203E-03  -.6678433E-04   .3470477E-03   .7402296E-03   .1136609E-02
   .1555437E-02   .1946000E-02   .2230208E-02   .2380445E-02   .2431360E-02
   .2383376E-02   .2210509E-02   .1936749E-02   .1594690E-02   .1169882E-02
   .6219276E-03  -.3044000E-04  -.7460117E-03  -.1515947E-02  -.2314516E-02
  -.3102197E-02  -.3843735E-02  -.4512729E-02  -.5050725E-02  -.5407937E-02
  -.5608824E-02  -.5708390E-02  -.5740751E-02  -.5713597E-02  -.5624589E-02
  -.5475654E-02  -.5291576E-02  -.5113594E-02  -.4959082E-02  -.4842396E-02
  -.4784276E-02  -.4785524E-02  -.4844061E-02  -.4958197E-02  -.5129606E-02
  -.5339525E-02  -.5568251E-02  -.5824101E-02  -.6105928E-02  -.6379402E-02
  -.6649614E-02  -.6945908E-02  -.7282138E-02  -.7667042E-02  -.8097007E-02
  -.8535347E-02  -.8960045E-02  -.9369181E-02  -.9774496E-02  -.1015977E-01
  -.1051187E-01  -.1085984E-01  -.1118925E-01  -.1144067E-01  -.1165818E-01
  -.1185940E-01  -.1199039E-01  -.1206103E-01  -.1213426E-01  -.1221719E-01
  -.1228511E-01  -.1232161E-01  -.1233349E-01  -.1232581E-01  -.1227295E-01
  -.1215732E-01  -.1194391E-01  -.1164742E-01  -.1132075E-01  -.1092898E-01
  -.1039895E-01  -.9701010E-02  -.8833989E-02  -.7864187E-02  -.6854163E-02
  -.5857737E-02  -.4931074E-02  -.4095093E-02  -.3347637E-02  -.2723199E-02
  -.2286198E-02  -.2069305E-02  -.2026719E-02  -.2115270E-02  -.2359067E-02
  -.2800434E-02  -.3417560E-02  -.4157579E-02  -.4956122E-02  -.5786051E-02
  -.6637646E-02  -.7480771E-02  -.8290593E-02  -.9034373E-02  -.9722244E-02
  -.1036117E-01  -.1096159E-01  -.1157339E-01  -.1221948E-01  -.1290449E-01
  -.1361060E-01  -.1433136E-01  -.1506924E-01  -.1579714E-01  -.1650893E-01
  -.1721333E-01  -.1790020E-01  -.1856931E-01  -.1922027E-01  -.1984215E-01
  -.2043015E-01  -.2095655E-01  -.2141554E-01  -.2181359E-01  -.2214210E-01
  -.2236373E-01  -.2247008E-01  -.2251803E-01  -.2256631E-01  -.2261624E-01
  -.2262849E-01  -.2258629E-01  -.2250057E-01  -.2238875E-01  -.2226032E-01
  -.2214599E-01  -.2206677E-01  -.2198256E-01  -.2185538E-01  -.2171213E-01
  -.2156030E-01  -.2137190E-01  -.2115121E-01  -.2094306E-01  -.2075958E-01
  -.2062468E-01  -.2054732E-01  -.2049328E-01  -.2041399E-01  -.2031699E-01
  -.2026347E-01  -.2030198E-01  -.2046470E-01  -.2075638E-01  -.2112316E-01
  -.2150310E-01  -.2187974E-01  -.2227082E-01  -.2268006E-01  -.2309627E-01
  -.2350694E-01  -.2390453E-01  -.2426846E-01  -.2461264E-01  -.2495667E-01
  -.2527625E-01  -.2550132E-01  -.2560250E-01  -.2563689E-01  -.2566756E-01
  -.2568861E-01  -.2564773E-01  -.2546762E-01  -.2511606E-01  -.2463506E-01
  -.2405088E-01  -.2333114E-01  -.2243475E-01  -.2137995E-01  -.2021438E-01
  -.1896135E-01  -.1762435E-01  -.1622478E-01  -.1481884E-01  -.1344250E-01
  -.1213720E-01  -.1093198E-01  -.9789573E-02  -.8714229E-02  -.7748846E-02
  -.6895166E-02  -.6157843E-02  -.5550977E-02  -.5032891E-02  -.4536168E-02
  -.4022977E-02  -.3510245E-02  -.3010554E-02  -.2539173E-02  -.2140096E-02
  -.1838958E-02  -.1605197E-02  -.1387149E-02  -.1178464E-02  -.1023821E-02
  -.9474398E-03  -.9377257E-03  -.9943438E-03  -.1121836E-02  -.1285010E-02
  -.1442173E-02  -.1613102E-02  -.1847651E-02  -.2145976E-02  -.2449715E-02
  -.2719830E-02  -.3001769E-02  -.3370621E-02  -.3828794E-02  -.4331444E-02
  -.4811966E-02  -.5221691E-02  -.5601152E-02  -.5964131E-02  -.6276676E-02
  -.6517198E-02  -.6714075E-02  -.6914566E-02  -.7121160E-02  -.7315389E-02
  -.7499098E-02  -.7668099E-02  -.7814265E-02  -.7925880E-02  -.8007399E-02
  -.8071235E-02  -.8129786E-02  -.8215971E-02  -.8333376E-02  -.8439182E-02
  -.8494635E-02  -.8485159E-02  -.8437913E-02  -.8393048E-02  -.8355547E-02
  -.8312684E-02  -.8249460E-02  -.8190474E-02  -.8155528E-02  -.8158969E-02
  -.8233858E-02  -.8383983E-02  -.8573423E-02  -.8775584E-02  -.9002633E-02
  -.9313717E-02  -.9718135E-02  -.1015132E-01  -.1058676E-01  -.1102692E-01
  -.1146753E-01  -.1187894E-01  -.1225130E-01  -.1263347E-01  -.1303001E-01
  -.1344036E-01  -.1389780E-01  -.1436203E-01  -.1477057E-01  -.1515764E-01
  -.1556454E-01  -.1597066E-01  -.1636355E-01  -.1673744E-01  -.1708075E-01
  -.1737274E-01  -.1757722E-01  -.1769370E-01  -.1773367E-01  -.1771232E-01
  -.1765344E-01  -.1756715E-01  -.1748250E-01  -.1738932E-01  -.1721527E-01
  -.1690392E-01  -.1646239E-01  -.1593334E-01  -.1536326E-01  -.1475883E-01
  -.1412894E-01  -.1349375E-01  -.1285937E-01  -.1222335E-01  -.1159548E-01
  -.1102147E-01  -.1051834E-01  -.1005931E-01  -.9620306E-02  -.9223702E-02
  -.8930114E-02  -.8774304E-02  -.8696421E-02  -.8643033E-02  -.8594255E-02
  -.8525825E-02  -.8403241E-02  -.8213713E-02  -.7970109E-02  -.7683147E-02
  -.7365981E-02  -.7033957E-02  -.6686009E-02  -.6319887E-02  -.5957943E-02
  -.5633210E-02  -.5391672E-02  -.5261204E-02  -.5215296E-02  -.5175334E-02
  -.5110841E-02  -.5103838E-02  -.5217147E-02  -.5395827E-02  -.5554376E-02
  -.5683536E-02  -.5818990E-02  -.5970897E-02  -.6143261E-02  -.6326516E-02
  -.6493931E-02  -.6655812E-02  -.6826523E-02  -.6991535E-02  -.7156485E-02
  -.7331895E-02  -.7517596E-02  -.7723068E-02  -.7926407E-02  -.8109007E-02
  -.8261469E-02  -.8376077E-02  -.8450622E-02  -.8491414E-02  -.8495440E-02
  -.8440130E-02  -.8336695E-02  -.8224464E-02  -.8118283E-02  -.8010760E-02
  -.7886488E-02  -.7755295E-02  -.7593834E-02  -.7391309E-02  -.7165766E-02
  -.6935487E-02  -.6713572E-02  -.6523619E-02  -.6357624E-02  -.6200628E-02
  -.6035209E-02  -.5873764E-02  -.5738180E-02  -.5613522E-02  -.5469430E-02
  -.5298136E-02  -.5107487E-02  -.4923719E-02  -.4727698E-02  -.4492936E-02
  -.4262359E-02  -.4056434E-02  -.3803393E-02  -.3468397E-02  -.3095921E-02
  -.2694785E-02  -.2238281E-02  -.1717258E-02  -.1157030E-02  -.5961882E-03
  -.5993385E-04   .4820411E-03   .1081825E-02   .1753375E-02   .2475451E-02
   .3198383E-02   .3919966E-02   .4641814E-02   .5340598E-02   .6024184E-02
   .6715267E-02   .7404711E-02   .8043013E-02   .8584674E-02   .9053660E-02
   .9445968E-02   .9720100E-02   .9855525E-02   .9860938E-02   .9756889E-02
   .9561471E-02   .9249471E-02   .8859435E-02   .8414182E-02   .7857854E-02
   .7151130E-02   .6290425E-02   .5320244E-02   .4266046E-02   .3166136E-02
   .2118759E-02   .1168418E-02   .2790113E-03  -.6141961E-03  -.1506703E-02
  -.2312947E-02  -.3005198E-02  -.3567578E-02  -.3986231E-02  -.4230802E-02
  -.4294917E-02  -.4226378E-02  -.4067199E-02  -.3839401E-02  -.3518910E-02
  -.3104044E-02  -.2620318E-02  -.2097403E-02  -.1535007E-02  -.8995239E-03
  -.2098129E-03   .4496361E-03   .1023739E-02   .1514485E-02   .1922562E-02
   .2265414E-02   .2582192E-02   .2919708E-02   .3266157E-02   .3555483E-02
   .3766896E-02   .3909748E-02   .3958317E-02   .3891686E-02   .3750744E-02
   .3608217E-02   .3476030E-02   .3320266E-02   .3122993E-02   .2869469E-02
   .2562170E-02   .2272543E-02   .2045340E-02   .1858633E-02   .1684506E-02
   .1544527E-02   .1471794E-02   .1466472E-02   .1553734E-02   .1718207E-02
   .1916156E-02   .2079725E-02   .2196980E-02   .2315924E-02   .2441610E-02
   .2541064E-02   .2561609E-02   .2497826E-02   .2358016E-02   .2158095E-02
   .1924248E-02   .1675423E-02   .1438385E-02   .1272527E-02   .1188907E-02
   .1162532E-02   .1193487E-02   .1275891E-02   .1402607E-02   .1574877E-02
   .1794565E-02   .2016881E-02   .2197531E-02   .2329025E-02   .2424779E-02
   .2515138E-02   .2570645E-02   .2527736E-02   .2372242E-02   .2133174E-02
   .1829284E-02   .1466152E-02   .1043663E-02   .5858754E-03   .1367107E-03
  -.2782792E-03  -.6981488E-03  -.1197067E-02  -.1794309E-02  -.2454836E-02
  -.3163909E-02  -.3960127E-02  -.4820348E-02  -.5674089E-02  -.6519208E-02
  -.7363709E-02  -.8198993E-02  -.9026030E-02  -.9852877E-02  -.1067581E-01
  -.1146141E-01  -.1217789E-01  -.1279642E-01  -.1330571E-01  -.1372565E-01
  -.1408599E-01  -.1442059E-01  -.1476070E-01  -.1509485E-01  -.1538548E-01
  -.1560718E-01  -.1577524E-01  -.1591475E-01  -.1605720E-01  -.1620851E-01
  -.1632657E-01  -.1638913E-01  -.1640231E-01  -.1638432E-01  -.1632335E-01
  -.1621918E-01  -.1611782E-01  -.1606003E-01  -.1605351E-01  -.1607098E-01
  -.1605925E-01  -.1600031E-01  -.1591204E-01  -.1580923E-01  -.1569342E-01
  -.1558118E-01  -.1548023E-01  -.1541737E-01  -.1543074E-01  -.1551639E-01
  -.1564414E-01  -.1579046E-01  -.1596785E-01  -.1622518E-01  -.1655969E-01
  -.1690463E-01  -.1723738E-01  -.1757129E-01  -.1787023E-01  -.1812248E-01
  -.1834803E-01  -.1855068E-01  -.1870125E-01  -.1876877E-01  -.1874539E-01
  -.1862095E-01  -.1840626E-01  -.1811641E-01  -.1771333E-01  -.1717608E-01
  -.1651570E-01  -.1577762E-01  -.1500631E-01  -.1419445E-01  -.1332807E-01
  -.1242395E-01  -.1150071E-01  -.1056451E-01  -.9624460E-02  -.8702992E-02
  -.7820652E-02  -.7000902E-02  -.6265660E-02  -.5625205E-02  -.5052932E-02
  -.4492007E-02  -.3946945E-02  -.3498053E-02  -.3170217E-02  -.2942657E-02
  -.2799471E-02  -.2739586E-02  -.2736613E-02  -.2770792E-02  -.2839142E-02
  -.2950191E-02  -.3114963E-02  -.3338489E-02  -.3612278E-02  -.3961005E-02
  -.4426577E-02  -.5010568E-02  -.5648193E-02  -.6251858E-02  -.6788923E-02
  -.7274894E-02  -.7743022E-02  -.8220823E-02  -.8698243E-02  -.9175204E-02
  -.9658530E-02  -.1009004E-01  -.1041251E-01  -.1060600E-01  -.1063998E-01
  -.1051687E-01  -.1028885E-01  -.1003229E-01  -.9796984E-02  -.9573884E-02
  -.9344113E-02  -.9098220E-02  -.8834801E-02  -.8569842E-02  -.8336096E-02
  -.8137679E-02  -.7998843E-02  -.7960694E-02  -.8030289E-02  -.8190011E-02
  -.8416910E-02  -.8710514E-02  -.9041971E-02  -.9365400E-02  -.9685764E-02
  -.9998966E-02  -.1027728E-01  -.1058603E-01  -.1099820E-01  -.1148910E-01
  -.1200235E-01  -.1250441E-01  -.1297037E-01  -.1339998E-01  -.1380731E-01
  -.1420185E-01  -.1457913E-01  -.1490038E-01  -.1515366E-01  -.1535852E-01
  -.1550612E-01  -.1555760E-01  -.1550588E-01  -.1540992E-01  -.1533620E-01
  -.1529425E-01  -.1525158E-01  -.1520578E-01  -.1517765E-01  -.1519274E-01
  -.1525842E-01  -.1534623E-01  -.1542368E-01  -.1551944E-01  -.1567438E-01
  -.1586626E-01  -.1605979E-01  -.1623764E-01  -.1636242E-01  -.1640713E-01
  -.1637765E-01  -.1627564E-01  -.1609512E-01  -.1584322E-01  -.1554257E-01
  -.1520152E-01  -.1482318E-01  -.1440010E-01  -.1395959E-01  -.1352141E-01
  -.1305447E-01  -.1251956E-01  -.1191603E-01  -.1131489E-01  -.1079624E-01
  -.1035729E-01  -.9966813E-02  -.9579199E-02  -.9196592E-02  -.8856547E-02
  -.8578972E-02  -.8346957E-02  -.8146301E-02  -.7982129E-02  -.7863651E-02
  -.7791021E-02  -.7715708E-02  -.7581615E-02  -.7391800E-02  -.7170597E-02
  -.6942124E-02  -.6709979E-02  -.6428506E-02  -.6105493E-02  -.5773947E-02
  -.5465218E-02  -.5193710E-02  -.4913272E-02  -.4639041E-02  -.4461421E-02
  -.4432279E-02  -.4475496E-02  -.4495658E-02  -.4510469E-02  -.4595142E-02
  -.4779440E-02  -.5019295E-02  -.5235570E-02  -.5365698E-02  -.5405786E-02
  -.5373910E-02  -.5278895E-02  -.5143165E-02  -.5001643E-02  -.4837528E-02
  -.4608615E-02  -.4288999E-02  -.3891747E-02  -.3481493E-02  -.3113672E-02
  -.2814485E-02  -.2563580E-02  -.2347102E-02  -.2158766E-02  -.1985832E-02
  -.1835209E-02  -.1711078E-02  -.1648596E-02  -.1645846E-02  -.1674587E-02
  -.1727945E-02  -.1783348E-02  -.1823542E-02  -.1861643E-02  -.1923510E-02
  -.2002451E-02  -.2082470E-02  -.2192247E-02  -.2352720E-02  -.2583967E-02
  -.2883723E-02  -.3226573E-02  -.3597751E-02  -.3980068E-02  -.4367223E-02
  -.4764573E-02  -.5175209E-02  -.5618480E-02  -.6140090E-02  -.6743407E-02
  -.7383287E-02  -.8019489E-02  -.8674979E-02  -.9368267E-02  -.1005006E-01
  -.1067930E-01  -.1123227E-01  -.1166612E-01  -.1197923E-01  -.1219182E-01
  -.1229796E-01  -.1227935E-01  -.1213207E-01  -.1187458E-01  -.1150326E-01
  -.1098720E-01  -.1033186E-01  -.9601177E-02  -.8850245E-02  -.8115650E-02
  -.7454752E-02  -.6852368E-02  -.6289885E-02  -.5794432E-02  -.5394218E-02
  -.5091516E-02  -.4860084E-02  -.4662447E-02  -.4471374E-02  -.4285726E-02
  -.4079406E-02  -.3797978E-02  -.3429750E-02  -.3018612E-02  -.2593921E-02
  -.2146355E-02  -.1683426E-02  -.1238706E-02  -.8025871E-03  -.3380459E-03
   .1539579E-03   .6228040E-03   .1035082E-02   .1377507E-02   .1662958E-02
   .1896154E-02   .2056658E-02   .2148556E-02   .2178932E-02   .2167143E-02
   .2149379E-02   .2146844E-02   .2152426E-02   .2145351E-02   .2143486E-02
   .2174660E-02   .2225230E-02   .2274979E-02   .2330414E-02   .2402092E-02
   .2465546E-02   .2531194E-02   .2621263E-02   .2725953E-02   .2807630E-02
   .2851464E-02   .2858318E-02   .2809020E-02   .2742000E-02   .2694215E-02
   .2650079E-02   .2611398E-02   .2569329E-02   .2509018E-02   .2435230E-02
   .2350333E-02   .2262295E-02   .2161949E-02   .2013957E-02   .1806321E-02
   .1532082E-02   .1200771E-02   .8665897E-03   .5539807E-03   .2478115E-03
  -.7538704E-04  -.4387647E-03  -.8878005E-03  -.1434668E-02  -.2044970E-02
  -.2657536E-02  -.3237323E-02  -.3787670E-02  -.4299539E-02  -.4702130E-02
  -.4987728E-02  -.5203800E-02  -.5350115E-02  -.5448460E-02  -.5483595E-02
  -.5390982E-02  -.5175726E-02  -.4850356E-02  -.4399578E-02  -.3857566E-02
  -.3283086E-02  -.2698362E-02  -.2112311E-02  -.1525648E-02  -.8956751E-03
  -.1848841E-03   .5890036E-03   .1355087E-02   .2064858E-02   .2751376E-02
   .3475546E-02   .4243674E-02   .5020750E-02   .5756706E-02   .6420487E-02
   .7043227E-02   .7673192E-02   .8311782E-02   .8932695E-02   .9525935E-02
   .1007969E-01   .1054842E-01   .1090237E-01   .1116984E-01   .1138833E-01
   .1157945E-01   .1172219E-01   .1179135E-01   .1179937E-01   .1178785E-01
   .1175806E-01   .1165982E-01   .1146987E-01   .1118472E-01   .1078174E-01
   .1027456E-01   .9667877E-02   .8955645E-02   .8145214E-02   .7263961E-02
   .6376516E-02   .5524793E-02   .4713097E-02   .3947269E-02   .3259106E-02
   .2684037E-02   .2224849E-02   .1868504E-02   .1616624E-02   .1482831E-02
   .1473188E-02   .1564046E-02   .1710197E-02   .1906164E-02   .2204269E-02
   .2628705E-02   .3115813E-02   .3586335E-02   .4040030E-02   .4540138E-02
   .5099423E-02   .5660033E-02   .6181531E-02   .6660440E-02   .7132081E-02
   .7614090E-02   .8066892E-02   .8479395E-02   .8905398E-02   .9363130E-02
   .9811037E-02   .1020828E-01   .1055326E-01   .1086678E-01   .1118348E-01
   .1153624E-01   .1192125E-01   .1233198E-01   .1274568E-01   .1310378E-01
   .1339879E-01   .1367613E-01   .1397457E-01   .1429151E-01   .1461249E-01
   .1494371E-01   .1527739E-01   .1551715E-01   .1561078E-01   .1562061E-01
   .1561932E-01   .1560993E-01   .1556427E-01   .1544878E-01   .1525725E-01
   .1502048E-01   .1474875E-01   .1443032E-01   .1405031E-01   .1362285E-01
   .1316355E-01   .1269433E-01   .1224801E-01   .1183228E-01   .1144716E-01
   .1108815E-01   .1076366E-01   .1048510E-01   .1026331E-01   .1012593E-01
   .1007258E-01   .1008799E-01   .1012762E-01   .1015292E-01   .1019397E-01
   .1027636E-01   .1039243E-01   .1050169E-01   .1057298E-01   .1062596E-01
   .1068272E-01   .1073189E-01   .1073712E-01   .1069360E-01   .1063467E-01
   .1062472E-01   .1069029E-01   .1076428E-01   .1076347E-01   .1067798E-01
   .1054619E-01   .1041068E-01   .1030175E-01   .1018071E-01   .1002933E-01
   .9912386E-02   .9849180E-02   .9821654E-02   .9867604E-02   .1003459E-01
   .1028902E-01   .1059973E-01   .1096399E-01   .1136542E-01   .1182568E-01
   .1236656E-01   .1294507E-01   .1350139E-01   .1402069E-01   .1452681E-01
   .1503011E-01   .1548135E-01   .1582239E-01   .1603140E-01   .1609912E-01
   .1603050E-01   .1586108E-01   .1561326E-01   .1528151E-01   .1482399E-01
   .1423580E-01   .1353635E-01   .1273248E-01   .1190173E-01   .1113925E-01
   .1044763E-01   .9745274E-02   .8992118E-02   .8228482E-02   .7468198E-02
   .6686745E-02   .5922741E-02   .5221786E-02   .4580079E-02   .4011699E-02
   .3520595E-02   .3086148E-02   .2713963E-02   .2437783E-02   .2270237E-02
   .2190765E-02   .2198411E-02   .2333866E-02   .2592579E-02   .2929201E-02
   .3314369E-02   .3737707E-02   .4215909E-02   .4759555E-02   .5323898E-02
   .5855038E-02   .6306912E-02   .6663283E-02   .6958290E-02   .7183598E-02
   .7301536E-02   .7354242E-02   .7388481E-02   .7368550E-02   .7210468E-02
   .6927163E-02   .6580413E-02   .6178495E-02   .5729009E-02   .5267636E-02
   .4819074E-02   .4375045E-02   .3940379E-02   .3527694E-02   .3156238E-02
   .2835549E-02   .2568507E-02   .2356986E-02   .2173345E-02   .2039313E-02
   .1969315E-02   .1934477E-02   .1880360E-02   .1757747E-02   .1588608E-02
   .1459510E-02   .1362928E-02   .1229882E-02   .1054937E-02   .8544048E-03
   .6321163E-03   .3890286E-03   .1171512E-03  -.1879163E-03  -.4860272E-03
  -.7765689E-03  -.1110432E-02  -.1493745E-02  -.1890182E-02  -.2296958E-02
  -.2718426E-02  -.3123154E-02  -.3468287E-02  -.3738793E-02  -.3965198E-02
  -.4191852E-02  -.4407224E-02  -.4604654E-02  -.4821560E-02  -.5062272E-02
  -.5271979E-02  -.5423439E-02  -.5532229E-02  -.5613505E-02  -.5684696E-02
  -.5749482E-02  -.5816748E-02  -.5927222E-02  -.6041520E-02  -.6115005E-02
  -.6168038E-02  -.6202664E-02  -.6191708E-02  -.6128120E-02  -.5993444E-02
  -.5782597E-02  -.5497781E-02  -.5113964E-02  -.4617978E-02  -.3992430E-02
  -.3213800E-02  -.2266289E-02  -.1148906E-02   .1140194E-03   .1510954E-02
   .3004172E-02   .4484292E-02   .5870013E-02   .7174600E-02   .8412703E-02
   .9521592E-02   .1045884E-01   .1123678E-01   .1187754E-01   .1242987E-01
   .1292844E-01   .1334855E-01   .1363841E-01   .1379978E-01   .1386447E-01
   .1382743E-01   .1367546E-01   .1342125E-01   .1305084E-01   .1251420E-01
   .1185130E-01   .1115911E-01   .1048912E-01   .9822675E-02   .9144806E-02
   .8471791E-02   .7826366E-02   .7185042E-02   .6529904E-02   .5876877E-02
   .5245061E-02   .4682657E-02   .4174875E-02   .3672243E-02   .3170761E-02
   .2713821E-02   .2328478E-02   .2008597E-02   .1757348E-02   .1588696E-02
   .1531544E-02   .1633758E-02   .1874608E-02   .2216896E-02   .2659321E-02
   .3177656E-02   .3748867E-02   .4386652E-02   .5100830E-02   .5890730E-02
   .6750791E-02   .7648492E-02   .8514161E-02   .9290408E-02   .9975545E-02
   .1060613E-01   .1119632E-01   .1173642E-01   .1220920E-01   .1262102E-01
   .1299601E-01   .1331160E-01   .1350884E-01   .1356780E-01   .1353678E-01
   .1344600E-01   .1331680E-01   .1317410E-01   .1302875E-01   .1287408E-01
   .1269349E-01   .1251877E-01   .1235348E-01   .1218945E-01   .1206627E-01
   .1201267E-01   .1200388E-01   .1200015E-01   .1199238E-01   .1195130E-01
   .1181188E-01   .1160224E-01   .1138597E-01   .1116110E-01   .1092992E-01
   .1070412E-01   .1050355E-01   .1033417E-01   .1016243E-01   .9998317E-02
   .9898977E-02   .9898818E-02   .1000420E-01   .1020328E-01   .1044737E-01
   .1070155E-01   .1092671E-01   .1110389E-01   .1122676E-01   .1130875E-01
   .1138489E-01   .1147944E-01   .1159786E-01   .1170180E-01   .1174563E-01
   .1174411E-01   .1174486E-01   .1175015E-01   .1174089E-01   .1176651E-01
   .1186638E-01   .1206295E-01   .1233581E-01   .1261209E-01   .1288505E-01
   .1318450E-01   .1352207E-01   .1387122E-01   .1421354E-01   .1453633E-01
   .1482706E-01   .1509771E-01   .1537839E-01   .1567700E-01   .1598782E-01
   .1630540E-01   .1661132E-01   .1688373E-01   .1710925E-01   .1732999E-01
   .1758398E-01   .1784437E-01   .1806892E-01   .1823723E-01   .1836562E-01
   .1852088E-01   .1870900E-01   .1890262E-01   .1912966E-01   .1940860E-01
   .1968544E-01   .1993526E-01   .2018662E-01   .2046506E-01   .2075772E-01
   .2102984E-01   .2126464E-01   .2146413E-01   .2159857E-01   .2168029E-01
   .2174327E-01   .2179093E-01   .2178965E-01   .2172518E-01   .2162554E-01
   .2152580E-01   .2140730E-01   .2119828E-01   .2088791E-01   .2052045E-01
   .2011677E-01   .1968061E-01   .1920113E-01   .1865592E-01   .1804092E-01
   .1737817E-01   .1668993E-01   .1597590E-01   .1518308E-01   .1424404E-01
   .1322281E-01   .1225248E-01   .1138919E-01   .1059879E-01   .9841489E-02
   .9083728E-02   .8314182E-02   .7549996E-02   .6818154E-02   .6119992E-02
   .5431791E-02   .4766886E-02   .4160802E-02   .3675527E-02   .3336531E-02
   .3066059E-02   .2788781E-02   .2491043E-02   .2189552E-02   .1866092E-02
   .1518073E-02   .1169585E-02   .8197417E-03   .4807006E-03   .1526502E-03
  -.1876649E-03  -.5607351E-03  -.9983151E-03  -.1496956E-02  -.2007364E-02
  -.2483156E-02  -.2927534E-02  -.3362016E-02  -.3780182E-02  -.4144877E-02
  -.4466059E-02  -.4769610E-02  -.5060440E-02  -.5289312E-02  -.5421477E-02
  -.5428342E-02  -.5279607E-02  -.4999166E-02  -.4651785E-02  -.4271577E-02
  -.3854134E-02  -.3396696E-02  -.2913932E-02  -.2396919E-02  -.1827761E-02
  -.1197630E-02  -.5449501E-03   .9038938E-04   .6827646E-03   .1193749E-02
   .1612266E-02   .1975823E-02   .2299057E-02   .2566638E-02   .2771940E-02
   .2920483E-02   .3030869E-02   .3109540E-02   .3150658E-02   .3170654E-02
   .3212064E-02   .3327474E-02   .3520171E-02   .3750096E-02   .3992518E-02
   .4272392E-02   .4619014E-02   .4997646E-02   .5373319E-02   .5737836E-02
   .6096858E-02   .6462624E-02   .6816545E-02   .7127552E-02   .7385614E-02
   .7608047E-02   .7818730E-02   .8020873E-02   .8209056E-02   .8353771E-02
   .8440059E-02   .8470461E-02   .8455342E-02   .8392396E-02   .8259851E-02
   .8106988E-02   .7987669E-02   .7866250E-02   .7701848E-02   .7446187E-02
   .7085584E-02   .6626478E-02   .6077887E-02   .5452714E-02   .4769847E-02
   .4060704E-02   .3384943E-02   .2764733E-02   .2158953E-02   .1541098E-02
   .9015948E-03   .2850198E-03  -.2486182E-03  -.6806118E-03  -.1029939E-02
  -.1271830E-02  -.1349037E-02  -.1300387E-02  -.1197760E-02  -.1073550E-02
  -.8904715E-03  -.6333086E-03  -.3017589E-03   .1239640E-03   .6507801E-03
   .1238085E-02   .1840557E-02   .2458737E-02   .3102454E-02   .3741232E-02
   .4318768E-02   .4826398E-02   .5280114E-02   .5674252E-02   .5983586E-02
   .6181553E-02   .6226019E-02   .6107439E-02   .5839825E-02   .5440136E-02
   .4911521E-02   .4257730E-02   .3531206E-02   .2794213E-02   .2086791E-02
   .1428001E-02   .8199469E-03   .2914455E-03  -.1229758E-03  -.4383913E-03
  -.6556923E-03  -.7741024E-03  -.7952101E-03  -.7321761E-03  -.6363934E-03
  -.5048942E-03  -.2894241E-03   .1820594E-04   .3808667E-03   .7181740E-03
   .1021121E-02   .1364491E-02   .1753337E-02   .2135618E-02   .2489496E-02
   .2839522E-02   .3228604E-02   .3641166E-02   .4008647E-02   .4295077E-02
   .4524462E-02   .4708845E-02   .4883422E-02   .5072334E-02   .5240749E-02
   .5338648E-02   .5338292E-02   .5267121E-02   .5179438E-02   .5051887E-02
   .4838955E-02   .4586871E-02   .4320214E-02   .4058447E-02   .3793561E-02
   .3487057E-02   .3207441E-02   .3048706E-02   .3000606E-02   .2994468E-02
   .2996317E-02   .3047840E-02   .3181474E-02   .3358659E-02   .3555358E-02
   .3804575E-02   .4112273E-02   .4442982E-02   .4788394E-02   .5154092E-02
   .5545562E-02   .5971182E-02   .6409403E-02   .6819366E-02   .7189008E-02
   .7503572E-02   .7754368E-02   .7955465E-02   .8089042E-02   .8102120E-02
   .7962283E-02   .7706754E-02   .7367435E-02   .6943510E-02   .6422552E-02
   .5828684E-02   .5204136E-02   .4558482E-02   .3894325E-02   .3248422E-02
   .2627441E-02   .1980613E-02   .1323129E-02   .7031057E-03   .1703356E-03
  -.2735861E-03  -.6505818E-03  -.9694542E-03  -.1219212E-02  -.1405023E-02
  -.1598569E-02  -.1818009E-02  -.2019921E-02  -.2170557E-02  -.2260107E-02
  -.2290938E-02  -.2259271E-02  -.2155797E-02  -.1986573E-02  -.1725940E-02
  -.1361072E-02  -.9126710E-03  -.3995907E-03   .1718575E-03   .7895698E-03
   .1384686E-02   .1890455E-02   .2314519E-02   .2660405E-02   .2913241E-02
   .3097737E-02   .3225281E-02   .3287025E-02   .3328202E-02   .3407586E-02
   .3495530E-02   .3581955E-02   .3721236E-02   .3937540E-02   .4192751E-02
   .4451227E-02   .4742873E-02   .5096035E-02   .5485541E-02   .5834482E-02
   .6096505E-02   .6290820E-02   .6436163E-02   .6572056E-02   .6739414E-02
   .6962485E-02   .7233776E-02   .7511175E-02   .7775173E-02   .8035898E-02
   .8287885E-02   .8490643E-02   .8607961E-02   .8703399E-02   .8845471E-02
   .9047672E-02   .9269549E-02   .9441513E-02   .9481896E-02   .9354073E-02
   .9056740E-02   .8616412E-02   .8074621E-02   .7487849E-02   .6877364E-02
   .6250047E-02   .5638589E-02   .5020978E-02   .4385281E-02   .3789020E-02
   .3241829E-02   .2702250E-02   .2170647E-02   .1703013E-02   .1367972E-02
   .1200355E-02   .1157777E-02   .1223009E-02   .1404136E-02   .1654780E-02
   .1906722E-02   .2160903E-02   .2451422E-02   .2781403E-02   .3121718E-02
   .3451536E-02   .3773395E-02   .4107430E-02   .4422941E-02   .4665686E-02
   .4882181E-02   .5099720E-02   .5300021E-02   .5496078E-02   .5684059E-02
   .5845178E-02   .5981517E-02   .6120768E-02   .6261814E-02   .6405427E-02
   .6552110E-02   .6698763E-02   .6848601E-02   .6979687E-02   .7055929E-02
   .7085366E-02   .7077615E-02   .7017763E-02   .6883139E-02   .6662057E-02
   .6362109E-02   .5982661E-02   .5521504E-02   .4992309E-02   .4454008E-02
   .3995393E-02   .3662776E-02   .3457650E-02   .3324016E-02   .3199014E-02
   .3079480E-02   .2989020E-02   .2943160E-02   .2927852E-02   .2903290E-02
   .2848410E-02   .2785509E-02   .2741811E-02   .2742683E-02   .2772451E-02
   .2829692E-02   .2914596E-02   .3010302E-02   .3097026E-02   .3174617E-02
   .3238568E-02   .3255844E-02   .3232533E-02   .3227195E-02   .3242518E-02
   .3242682E-02   .3217246E-02   .3175980E-02   .3151783E-02   .3143640E-02
   .3104343E-02   .3068322E-02   .3061312E-02   .3056869E-02   .3076586E-02
   .3120099E-02   .3126960E-02   .3039197E-02   .2828681E-02   .2510353E-02
   .2101472E-02   .1621718E-02   .1113959E-02   .6250643E-03   .1624451E-03
  -.2858167E-03  -.7248004E-03  -.1152686E-02  -.1557570E-02  -.1927056E-02
  -.2241707E-02  -.2503598E-02  -.2745591E-02  -.2963381E-02  -.3144013E-02
  -.3306214E-02  -.3471302E-02  -.3629979E-02  -.3764116E-02  -.3880948E-02
  -.4009089E-02  -.4155589E-02  -.4311292E-02  -.4451676E-02  -.4530148E-02
  -.4512121E-02  -.4388708E-02  -.4177812E-02  -.3913900E-02  -.3610278E-02
  -.3285393E-02  -.2974932E-02  -.2662286E-02  -.2299494E-02  -.1942474E-02
  -.1673653E-02  -.1473503E-02  -.1310999E-02  -.1153297E-02  -.9382701E-03
  -.6768304E-03  -.4430967E-03  -.2742651E-03  -.1312413E-03  -.2453842E-05
   .8222513E-04   .1485820E-03   .2351443E-03   .3615028E-03   .5308338E-03
   .7379736E-03   .9715046E-03   .1214283E-02   .1447171E-02   .1636865E-02
   .1765474E-02   .1845309E-02   .1917102E-02   .1998599E-02   .2029654E-02
   .1965041E-02   .1798202E-02   .1490718E-02   .1036801E-02   .5003652E-03
  -.6567671E-04  -.6298403E-03  -.1143931E-02  -.1572604E-02  -.1931029E-02
  -.2249305E-02  -.2538499E-02  -.2796868E-02  -.2973773E-02  -.3038754E-02
  -.3026235E-02  -.3020005E-02  -.3060474E-02  -.3142391E-02  -.3241507E-02
  -.3305850E-02  -.3344737E-02  -.3402750E-02  -.3458715E-02  -.3489110E-02
  -.3519443E-02  -.3584629E-02  -.3686341E-02  -.3832087E-02  -.4015578E-02
  -.4201531E-02  -.4408643E-02  -.4677461E-02  -.4986399E-02  -.5346895E-02
  -.5773034E-02  -.6228295E-02  -.6692345E-02  -.7201898E-02  -.7793056E-02
  -.8440446E-02  -.9106638E-02  -.9756307E-02  -.1036370E-01  -.1092770E-01
  -.1146680E-01  -.1197400E-01  -.1244883E-01  -.1289594E-01  -.1330154E-01
  -.1364062E-01  -.1392725E-01  -.1414030E-01  -.1426140E-01  -.1433344E-01
  -.1436723E-01  -.1436878E-01  -.1436926E-01  -.1439423E-01  -.1445041E-01
  -.1450879E-01  -.1450753E-01  -.1441453E-01  -.1427342E-01  -.1414503E-01
  -.1403244E-01  -.1390169E-01  -.1373042E-01  -.1354376E-01  -.1339657E-01
  -.1331700E-01  -.1327504E-01  -.1323842E-01  -.1323050E-01  -.1330332E-01
  -.1344171E-01  -.1361405E-01  -.1379227E-01  -.1398900E-01  -.1424653E-01
  -.1455304E-01  -.1485860E-01  -.1513578E-01  -.1539988E-01  -.1567817E-01
  -.1595848E-01  -.1621019E-01  -.1640295E-01  -.1655000E-01  -.1666298E-01
  -.1670466E-01  -.1667955E-01  -.1663408E-01  -.1658957E-01  -.1651401E-01
  -.1637643E-01  -.1617767E-01  -.1592315E-01  -.1560084E-01  -.1520992E-01
  -.1477763E-01  -.1435334E-01  -.1395182E-01  -.1356780E-01  -.1319515E-01
  -.1282336E-01  -.1241929E-01  -.1197828E-01  -.1153797E-01  -.1114587E-01
  -.1080649E-01  -.1055771E-01  -.1041559E-01  -.1031282E-01  -.1017388E-01
  -.9994823E-02  -.9809478E-02  -.9597420E-02  -.9335830E-02  -.9051627E-02
  -.8794253E-02  -.8593238E-02  -.8462493E-02  -.8354649E-02  -.8202612E-02
  -.7994048E-02  -.7749514E-02  -.7501095E-02  -.7299879E-02  -.7152550E-02
  -.7042594E-02  -.6981700E-02  -.7004594E-02  -.7122807E-02  -.7314652E-02
  -.7583731E-02  -.7916903E-02  -.8286041E-02  -.8649418E-02  -.8954718E-02
  -.9212337E-02  -.9400995E-02  -.9491582E-02  -.9485874E-02  -.9407907E-02
  -.9284355E-02  -.9117026E-02  -.8901029E-02  -.8657581E-02  -.8409509E-02
  -.8150024E-02  -.7855658E-02  -.7557328E-02  -.7310479E-02  -.7112507E-02
  -.6931864E-02  -.6814852E-02  -.6768327E-02  -.6696227E-02  -.6561762E-02
  -.6370580E-02  -.6154550E-02  -.5937451E-02  -.5721567E-02  -.5491752E-02
  -.5226267E-02  -.4935022E-02  -.4631639E-02  -.4303176E-02  -.3943605E-02
  -.3579289E-02  -.3227807E-02  -.2904060E-02  -.2650189E-02  -.2477152E-02
  -.2373471E-02  -.2345545E-02  -.2390394E-02  -.2485416E-02  -.2617875E-02
  -.2825509E-02  -.3124798E-02  -.3479444E-02  -.3853363E-02  -.4253709E-02
  -.4677533E-02  -.5069528E-02  -.5388049E-02  -.5640450E-02  -.5856100E-02
  -.6026294E-02  -.6118287E-02  -.6150255E-02  -.6154471E-02  -.6168277E-02
  -.6200297E-02  -.6240831E-02  -.6301898E-02  -.6401887E-02  -.6557199E-02
  -.6757425E-02  -.6993275E-02  -.7271177E-02  -.7604570E-02  -.7991396E-02
  -.8449284E-02  -.8985494E-02  -.9585476E-02  -.1023393E-01  -.1092321E-01
  -.1160269E-01  -.1220502E-01  -.1271908E-01  -.1316844E-01  -.1358743E-01
  -.1397232E-01  -.1429151E-01  -.1457656E-01  -.1486076E-01  -.1510847E-01
  -.1527876E-01  -.1535547E-01  -.1533487E-01  -.1524166E-01  -.1512772E-01
  -.1503523E-01  -.1495291E-01  -.1487247E-01  -.1479944E-01  -.1469328E-01
  -.1450706E-01  -.1422902E-01  -.1388117E-01  -.1348316E-01  -.1306000E-01
  -.1263957E-01  -.1220729E-01  -.1169895E-01  -.1109553E-01  -.1046840E-01
  -.9872126E-02  -.9310187E-02  -.8754076E-02  -.8218239E-02  -.7756072E-02
  -.7391207E-02  -.7103364E-02  -.6852693E-02  -.6632303E-02  -.6484400E-02
  -.6425934E-02  -.6447104E-02  -.6516766E-02  -.6609396E-02  -.6716214E-02
  -.6779957E-02  -.6755058E-02  -.6670209E-02  -.6554887E-02  -.6421816E-02
  -.6259498E-02  -.6057699E-02  -.5782595E-02  -.5423724E-02  -.4997552E-02
  -.4528323E-02  -.4030960E-02  -.3530765E-02  -.3033559E-02  -.2493733E-02
  -.1909709E-02  -.1294121E-02  -.6589555E-03  -.7050417E-04   .4320658E-03
   .8845716E-03   .1326789E-02   .1758057E-02   .2152061E-02   .2536138E-02
   .2938871E-02   .3315397E-02   .3640264E-02   .3930230E-02   .4175971E-02
   .4348726E-02   .4429658E-02   .4415603E-02   .4354331E-02   .4256968E-02
   .4050242E-02   .3643282E-02   .3040735E-02   .2319922E-02   .1533203E-02
   .7167237E-03  -.8205560E-04  -.7868014E-03  -.1364877E-02  -.1859512E-02
  -.2340616E-02  -.2814215E-02  -.3213376E-02  -.3487616E-02  -.3663698E-02
  -.3771226E-02  -.3831692E-02  -.3854432E-02  -.3869558E-02  -.3901094E-02
  -.3954416E-02  -.4004239E-02  -.4022466E-02  -.4028372E-02  -.4051340E-02
  -.4084620E-02  -.4116133E-02  -.4155694E-02  -.4217094E-02  -.4281483E-02
  -.4347996E-02  -.4446098E-02  -.4562466E-02  -.4673581E-02  -.4782580E-02
  -.4879392E-02  -.4989835E-02  -.5143546E-02  -.5293736E-02  -.5351644E-02
  -.5329459E-02  -.5301693E-02  -.5324320E-02  -.5362464E-02  -.5376085E-02
  -.5339963E-02  -.5229826E-02  -.5041600E-02  -.4817187E-02  -.4635680E-02
  -.4509189E-02  -.4372565E-02  -.4226864E-02  -.4158271E-02  -.4165495E-02
  -.4168060E-02  -.4161791E-02  -.4213809E-02  -.4289820E-02  -.4339662E-02
  -.4378245E-02  -.4439375E-02  -.4520080E-02  -.4583706E-02  -.4581021E-02
  -.4470536E-02  -.4258797E-02  -.4003041E-02  -.3741048E-02  -.3499322E-02
  -.3300991E-02  -.3123922E-02  -.2943989E-02  -.2749581E-02  -.2559050E-02
  -.2415617E-02  -.2375996E-02  -.2436993E-02  -.2539620E-02  -.2676831E-02
  -.2864457E-02  -.3072060E-02  -.3287261E-02  -.3526988E-02  -.3815365E-02
  -.4153283E-02  -.4492986E-02  -.4792989E-02  -.5079451E-02  -.5348639E-02
  -.5542250E-02  -.5634386E-02  -.5655990E-02  -.5626772E-02  -.5519528E-02
  -.5310919E-02  -.5024900E-02  -.4727920E-02  -.4434050E-02  -.4125317E-02
  -.3822384E-02  -.3563979E-02  -.3344689E-02  -.3147155E-02  -.2981212E-02
  -.2825247E-02  -.2661706E-02  -.2501639E-02  -.2349121E-02  -.2215577E-02
  -.2115355E-02  -.2088448E-02  -.2138656E-02  -.2204557E-02  -.2245660E-02
  -.2282828E-02  -.2366274E-02  -.2504742E-02  -.2662651E-02  -.2799893E-02
  -.2923677E-02  -.3032504E-02  -.3133916E-02  -.3246712E-02  -.3366976E-02
  -.3488323E-02  -.3603948E-02  -.3646134E-02  -.3543970E-02  -.3309012E-02
  -.2999653E-02  -.2640937E-02  -.2191505E-02  -.1647541E-02  -.1023163E-02
  -.3059138E-03   .4654446E-03   .1244783E-02   .2033946E-02   .2818643E-02
   .3537203E-02   .4103465E-02   .4508673E-02   .4812592E-02   .5081695E-02
   .5310100E-02   .5519005E-02   .5793152E-02   .6123886E-02   .6401753E-02
   .6625392E-02   .6851150E-02   .7105835E-02   .7386087E-02   .7659230E-02
   .7898451E-02   .8103087E-02   .8308934E-02   .8519826E-02   .8692997E-02
   .8809940E-02   .8885660E-02   .8918902E-02   .8931944E-02   .8955564E-02
   .9026053E-02   .9166503E-02   .9358837E-02   .9552464E-02   .9763589E-02
   .1007970E-01   .1048385E-01   .1090045E-01   .1130267E-01   .1168467E-01
   .1206958E-01   .1243662E-01   .1275415E-01   .1301231E-01   .1322448E-01
   .1345190E-01   .1369605E-01   .1393977E-01   .1415850E-01   .1431486E-01
   .1441315E-01   .1449869E-01   .1458613E-01   .1466306E-01   .1472517E-01
   .1479539E-01   .1487623E-01   .1495518E-01   .1503286E-01   .1512236E-01
   .1524847E-01   .1539327E-01   .1551738E-01   .1562536E-01   .1574775E-01
   .1589359E-01   .1605567E-01   .1624688E-01   .1646817E-01   .1669004E-01
   .1688221E-01   .1704321E-01   .1715382E-01   .1718585E-01   .1716061E-01
   .1709584E-01   .1697094E-01   .1677637E-01   .1650147E-01   .1616996E-01
   .1582502E-01   .1549697E-01   .1521145E-01   .1491802E-01   .1457046E-01
   .1419900E-01   .1386583E-01   .1360443E-01   .1339902E-01   .1321961E-01
   .1304352E-01   .1288886E-01   .1278753E-01   .1270468E-01   .1257966E-01
   .1244423E-01   .1237759E-01   .1238467E-01   .1241838E-01   .1244817E-01
   .1247230E-01   .1250272E-01   .1254670E-01   .1255878E-01   .1249331E-01
   .1240185E-01   .1234762E-01   .1231443E-01   .1224394E-01   .1209178E-01
   .1189483E-01   .1171322E-01   .1158908E-01   .1152363E-01   .1151209E-01
   .1156880E-01   .1166942E-01   .1178376E-01   .1189510E-01   .1200199E-01
   .1213820E-01   .1232060E-01   .1251096E-01   .1270073E-01   .1291185E-01
   .1314986E-01   .1337265E-01   .1352805E-01   .1360961E-01   .1363694E-01
   .1365869E-01   .1371342E-01   .1379142E-01   .1387337E-01   .1390737E-01
   .1386517E-01   .1380977E-01   .1377382E-01   .1373846E-01   .1373801E-01
   .1381145E-01   .1393668E-01   .1401746E-01   .1396200E-01   .1382029E-01
   .1369884E-01   .1360046E-01   .1347824E-01   .1328338E-01   .1297552E-01
   .1255112E-01   .1203422E-01   .1147530E-01   .1091009E-01   .1034762E-01
   .9787035E-02   .9206801E-02   .8626304E-02   .8053857E-02   .7464227E-02
   .6857417E-02   .6254715E-02   .5700789E-02   .5208641E-02   .4766368E-02
   .4387535E-02   .4064990E-02   .3797126E-02   .3592749E-02   .3428457E-02
   .3318339E-02   .3277374E-02   .3316581E-02   .3445651E-02   .3609309E-02
   .3759127E-02   .3896401E-02   .4014071E-02   .4114516E-02   .4223032E-02
   .4339082E-02   .4455719E-02   .4560768E-02   .4644608E-02   .4696110E-02
   .4718708E-02   .4723821E-02   .4716332E-02   .4701193E-02   .4691288E-02
   .4717533E-02   .4785889E-02   .4872135E-02   .4931707E-02   .4927492E-02
   .4843619E-02   .4714232E-02   .4542935E-02   .4315716E-02   .4030668E-02
   .3742152E-02   .3507466E-02   .3271982E-02   .3003683E-02   .2749152E-02
   .2546518E-02   .2386621E-02   .2221170E-02   .2040712E-02   .1880285E-02
   .1773555E-02   .1718733E-02   .1650192E-02   .1539152E-02   .1473224E-02
   .1529001E-02   .1672515E-02   .1830332E-02   .1994307E-02   .2195598E-02
   .2431712E-02   .2663109E-02   .2875053E-02   .3087706E-02   .3312758E-02
   .3525509E-02   .3690251E-02   .3790163E-02   .3804090E-02   .3774000E-02
   .3786882E-02   .3864160E-02   .3968486E-02   .4055622E-02   .4106766E-02
   .4125844E-02   .4138554E-02   .4173645E-02   .4246531E-02   .4358384E-02
   .4519925E-02   .4729468E-02   .4947594E-02   .5129445E-02   .5249022E-02
   .5315266E-02   .5337490E-02   .5348642E-02   .5370301E-02   .5405832E-02
   .5452940E-02   .5471224E-02   .5444682E-02   .5319898E-02   .5088187E-02
   .4814498E-02   .4509529E-02   .4157763E-02   .3741284E-02   .3260256E-02
   .2743798E-02   .2207233E-02   .1637787E-02   .1026484E-02   .3774560E-03
  -.2960250E-03  -.9720514E-03  -.1627929E-02  -.2265547E-02  -.2893397E-02
  -.3505997E-02  -.4099185E-02  -.4713157E-02  -.5364470E-02  -.5989005E-02
  -.6546775E-02  -.7033587E-02  -.7466769E-02  -.7888144E-02  -.8318854E-02
  -.8738398E-02  -.9127601E-02  -.9540846E-02  -.9961483E-02  -.1032516E-01
  -.1061538E-01  -.1084766E-01  -.1107942E-01  -.1133180E-01  -.1155821E-01
  -.1171926E-01  -.1184942E-01  -.1197706E-01  -.1208110E-01  -.1214531E-01
  -.1214976E-01  -.1208741E-01  -.1198330E-01  -.1186604E-01  -.1176585E-01
  -.1167353E-01  -.1155994E-01  -.1143428E-01  -.1132604E-01  -.1123492E-01
  -.1111384E-01  -.1094189E-01  -.1078373E-01  -.1068970E-01  -.1063732E-01
  -.1060012E-01  -.1057653E-01  -.1054678E-01  -.1052202E-01  -.1050206E-01
  -.1045554E-01  -.1038114E-01  -.1032600E-01  -.1031400E-01  -.1031322E-01
  -.1028648E-01  -.1024312E-01  -.1017934E-01  -.1007434E-01  -.9949295E-02
  -.9833949E-02  -.9717346E-02  -.9615306E-02  -.9573200E-02  -.9587031E-02
  -.9617958E-02  -.9638375E-02  -.9657890E-02  -.9675697E-02  -.9722013E-02
  -.9826204E-02  -.9932226E-02  -.9992237E-02  -.1004505E-01  -.1011880E-01
  -.1019770E-01  -.1028314E-01  -.1037536E-01  -.1048004E-01  -.1059593E-01
  -.1070799E-01  -.1080788E-01  -.1090787E-01  -.1103669E-01  -.1116695E-01
  -.1125550E-01  -.1131639E-01  -.1135260E-01  -.1137697E-01  -.1141177E-01
  -.1145228E-01  -.1147146E-01  -.1145549E-01  -.1141273E-01  -.1133268E-01
  -.1121230E-01  -.1110290E-01  -.1107039E-01  -.1111507E-01  -.1114543E-01
  -.1112374E-01  -.1109544E-01  -.1107378E-01  -.1104900E-01  -.1102903E-01
  -.1100493E-01  -.1097110E-01  -.1095048E-01  -.1094753E-01  -.1093791E-01
  -.1089682E-01  -.1083058E-01  -.1073488E-01  -.1058991E-01  -.1039989E-01
  -.1016977E-01  -.9926422E-02  -.9671857E-02  -.9380339E-02  -.9044876E-02
  -.8659620E-02  -.8223686E-02  -.7748686E-02  -.7255904E-02  -.6730647E-02
  -.6165753E-02  -.5603363E-02  -.5073306E-02  -.4541899E-02  -.3971292E-02
  -.3353913E-02  -.2725718E-02  -.2117250E-02  -.1512128E-02  -.8727862E-03
  -.2185623E-03   .4248882E-03   .1058582E-02   .1654222E-02   .2196991E-02
   .2713206E-02   .3209086E-02   .3638782E-02   .3979222E-02   .4229601E-02
   .4397589E-02   .4525059E-02   .4643440E-02   .4746165E-02   .4825740E-02
   .4879035E-02   .4915705E-02   .4910716E-02   .4844225E-02   .4750203E-02
   .4683293E-02   .4659117E-02   .4649764E-02   .4654618E-02   .4657894E-02
   .4617282E-02   .4501705E-02   .4336205E-02   .4162768E-02   .3969277E-02
   .3763225E-02   .3594146E-02   .3501587E-02   .3471523E-02   .3471540E-02
   .3465208E-02   .3447268E-02   .3459303E-02   .3501436E-02   .3530734E-02
   .3526434E-02   .3501067E-02   .3458098E-02   .3367541E-02   .3181364E-02
   .2906761E-02   .2593999E-02   .2282945E-02   .1997882E-02   .1737748E-02
   .1483495E-02   .1247147E-02   .1018741E-02   .7816352E-03   .5623468E-03
   .3663540E-03   .1834053E-03   .3820452E-04  -.5241891E-04  -.1169611E-03
  -.1656938E-03  -.1623639E-03  -.7409879E-04   .6548252E-04   .2089860E-03
   .3238098E-03   .4017446E-03   .4757966E-03   .5697563E-03   .6541226E-03
   .7022237E-03   .7136206E-03   .6918599E-03   .6548169E-03   .6092203E-03
   .5344995E-03   .4352766E-03   .3806339E-03   .3890719E-03   .4325998E-03
   .5010209E-03   .6009813E-03   .7820310E-03   .1056796E-02   .1386581E-02
   .1728920E-02   .2092708E-02   .2528489E-02   .3028760E-02   .3525751E-02
   .3983189E-02   .4414685E-02   .4842802E-02   .5236444E-02   .5546862E-02
   .5803558E-02   .6101166E-02   .6476159E-02   .6852052E-02   .7169537E-02
   .7440505E-02   .7728890E-02   .8054233E-02   .8377111E-02   .8665750E-02
   .8921555E-02   .9185181E-02   .9477620E-02   .9779566E-02   .1005751E-01
   .1027863E-01   .1047937E-01   .1068532E-01   .1084780E-01   .1088945E-01
   .1080270E-01   .1068214E-01   .1056757E-01   .1041111E-01   .1015893E-01
   .9802753E-02   .9370620E-02   .8893428E-02   .8407812E-02   .7945966E-02
   .7519549E-02   .7125627E-02   .6794147E-02   .6493714E-02   .6177551E-02
   .5871236E-02   .5596127E-02   .5354804E-02   .5143984E-02   .4950524E-02
   .4755981E-02   .4534843E-02   .4260618E-02   .3923962E-02   .3537022E-02
   .3106643E-02   .2634757E-02   .2100432E-02   .1521234E-02   .9352517E-03
   .3508373E-03  -.2629011E-03  -.8977095E-03  -.1513357E-02  -.2086680E-02
  -.2598478E-02  -.3023537E-02  -.3379715E-02  -.3688490E-02  -.3944772E-02
  -.4128767E-02  -.4230051E-02  -.4280399E-02  -.4331474E-02  -.4381676E-02
  -.4383066E-02  -.4325785E-02  -.4254959E-02  -.4204704E-02  -.4170450E-02
  -.4124456E-02  -.4078003E-02  -.4046359E-02  -.4029801E-02  -.4036149E-02
  -.4065670E-02  -.4139791E-02  -.4257576E-02  -.4385681E-02  -.4544799E-02
  -.4768764E-02  -.5044270E-02  -.5338795E-02  -.5664220E-02  -.6010512E-02
  -.6359504E-02  -.6692809E-02  -.6979315E-02  -.7215642E-02  -.7429189E-02
  -.7640818E-02  -.7821281E-02  -.7929343E-02  -.7971525E-02  -.7989705E-02
  -.7997835E-02  -.7973165E-02  -.7904847E-02  -.7807013E-02  -.7670287E-02
  -.7469763E-02  -.7204360E-02  -.6881841E-02  -.6498948E-02  -.6033249E-02
  -.5527412E-02  -.5029950E-02  -.4519717E-02  -.3999604E-02  -.3495602E-02
  -.3010249E-02  -.2526168E-02  -.2049439E-02  -.1623669E-02  -.1208046E-02
  -.7566567E-03  -.3127723E-03   .4634429E-04   .2646138E-03   .3722601E-03
   .4061908E-03   .3768119E-03   .3074217E-03   .2231346E-03   .1148992E-03
  -.2866339E-04  -.2163895E-03  -.4439449E-03  -.6709876E-03  -.8500415E-03
  -.9752693E-03  -.1075917E-02  -.1161499E-02  -.1215730E-02  -.1242184E-02
  -.1266563E-02  -.1332947E-02  -.1442099E-02  -.1561694E-02  -.1676606E-02
  -.1789668E-02  -.1906949E-02  -.2023496E-02  -.2131005E-02  -.2265834E-02
  -.2466421E-02  -.2721434E-02  -.2992229E-02  -.3221120E-02  -.3379687E-02
  -.3463398E-02  -.3493298E-02  -.3506967E-02  -.3542183E-02  -.3598502E-02
  -.3661632E-02  -.3716524E-02  -.3771059E-02  -.3835963E-02  -.3905439E-02
  -.3978669E-02  -.4036638E-02  -.4085027E-02  -.4173067E-02  -.4298215E-02
  -.4456312E-02  -.4630233E-02  -.4783490E-02  -.4913333E-02  -.5013798E-02
  -.5057713E-02  -.5037449E-02  -.4991282E-02  -.4918272E-02  -.4786490E-02
  -.4582360E-02  -.4355628E-02  -.4114473E-02  -.3816307E-02  -.3428650E-02
  -.2997829E-02  -.2612227E-02  -.2260806E-02  -.1911283E-02  -.1589940E-02
  -.1321808E-02  -.1096342E-02  -.9103511E-03  -.7673612E-03  -.6507402E-03
  -.5519400E-03  -.5106613E-03  -.5292670E-03  -.5967680E-03  -.7362175E-03
  -.9375006E-03  -.1150985E-02  -.1341973E-02  -.1514463E-02  -.1679170E-02
  -.1819926E-02  -.1950294E-02  -.2109128E-02  -.2279698E-02  -.2445869E-02
  -.2607992E-02  -.2791006E-02  -.3022780E-02  -.3282436E-02  -.3556865E-02
  -.3834407E-02  -.4092873E-02  -.4335152E-02  -.4602740E-02  -.4906472E-02
  -.5216249E-02  -.5544414E-02  -.5878810E-02  -.6188838E-02  -.6491021E-02
  -.6816941E-02  -.7177309E-02  -.7575511E-02  -.7986735E-02  -.8380305E-02
  -.8722050E-02  -.8982554E-02  -.9188475E-02  -.9356933E-02  -.9458133E-02
  -.9460250E-02  -.9365030E-02  -.9180475E-02  -.8967646E-02  -.8763917E-02
  -.8510752E-02  -.8208690E-02  -.7937407E-02  -.7745303E-02  -.7591593E-02
  -.7406682E-02  -.7197714E-02  -.7009176E-02  -.6832047E-02  -.6657874E-02
  -.6509297E-02  -.6379445E-02  -.6260834E-02  -.6155933E-02  -.6037351E-02
  -.5890656E-02  -.5727436E-02  -.5548257E-02  -.5375845E-02  -.5220774E-02
  -.5078967E-02  -.4950546E-02  -.4811148E-02  -.4683482E-02  -.4621931E-02
  -.4628447E-02  -.4636406E-02  -.4635500E-02  -.4655759E-02  -.4676481E-02
  -.4686227E-02  -.4695718E-02  -.4672015E-02  -.4578134E-02  -.4425123E-02
  -.4219055E-02  -.3940145E-02  -.3584818E-02  -.3133419E-02  -.2604657E-02
  -.2058103E-02  -.1520839E-02  -.1011924E-02  -.5010310E-03   .3326309E-04
   .6226350E-03   .1268224E-02   .1878345E-02   .2395708E-02   .2812797E-02
   .3114093E-02   .3300491E-02   .3389411E-02   .3439817E-02   .3501965E-02
   .3534845E-02   .3494271E-02   .3352443E-02   .3106424E-02   .2791042E-02
   .2416506E-02   .2035977E-02   .1687633E-02   .1364030E-02   .1012621E-02
   .6142800E-03   .1990367E-03  -.2357688E-03  -.6855707E-03  -.1147825E-02
  -.1597746E-02  -.2027677E-02  -.2492510E-02  -.3016183E-02  -.3583747E-02
  -.4165557E-02  -.4703171E-02  -.5164515E-02  -.5545782E-02  -.5865382E-02
  -.6124178E-02  -.6314742E-02  -.6444192E-02  -.6519718E-02  -.6543820E-02
  -.6529809E-02  -.6502902E-02  -.6484268E-02  -.6492469E-02  -.6522334E-02
  -.6542603E-02  -.6574291E-02  -.6646831E-02  -.6763101E-02  -.6894134E-02
  -.7000629E-02  -.7094257E-02  -.7211813E-02  -.7386059E-02  -.7581873E-02
  -.7737438E-02  -.7865722E-02  -.8034553E-02  -.8261422E-02  -.8522729E-02
  -.8756527E-02  -.8921163E-02  -.9042528E-02  -.9190856E-02  -.9368868E-02
  -.9530115E-02  -.9695168E-02  -.9909082E-02  -.1018144E-01  -.1045297E-01
  -.1068037E-01  -.1088552E-01  -.1107104E-01  -.1122291E-01  -.1133948E-01
  -.1143264E-01  -.1151586E-01  -.1158703E-01  -.1164593E-01  -.1167738E-01
  -.1167453E-01  -.1168193E-01  -.1173825E-01  -.1182500E-01  -.1192826E-01
  -.1204935E-01  -.1215649E-01  -.1220872E-01  -.1219085E-01  -.1214861E-01
  -.1213697E-01  -.1214847E-01  -.1213730E-01  -.1206346E-01  -.1193887E-01
  -.1178491E-01  -.1157741E-01  -.1131472E-01  -.1101961E-01  -.1072327E-01
  -.1045822E-01  -.1021631E-01  -.9981084E-02  -.9792031E-02  -.9641136E-02
  -.9450366E-02  -.9210572E-02  -.8958143E-02  -.8701508E-02  -.8422536E-02
  -.8126819E-02  -.7832163E-02  -.7536571E-02  -.7279923E-02  -.7070029E-02
  -.6855368E-02  -.6602969E-02  -.6333236E-02  -.6097869E-02  -.5895517E-02
  -.5709859E-02  -.5578774E-02  -.5487121E-02  -.5383434E-02  -.5283970E-02
  -.5222619E-02  -.5182204E-02  -.5173255E-02  -.5230389E-02  -.5340301E-02
  -.5441728E-02  -.5478235E-02  -.5430394E-02  -.5306124E-02  -.5149108E-02
  -.4962497E-02  -.4700908E-02  -.4389819E-02  -.4117404E-02  -.3900803E-02
  -.3734125E-02  -.3616734E-02  -.3509538E-02  -.3401439E-02  -.3351674E-02
  -.3410200E-02  -.3521762E-02  -.3618765E-02  -.3704953E-02  -.3817917E-02
  -.3957751E-02  -.4088646E-02  -.4170801E-02  -.4188587E-02  -.4208766E-02
  -.4298393E-02  -.4446971E-02  -.4600956E-02  -.4774468E-02  -.4962876E-02
  -.5112811E-02  -.5234856E-02  -.5365468E-02  -.5504809E-02  -.5619336E-02
  -.5734947E-02  -.5864736E-02  -.5983289E-02  -.6075487E-02  -.6127098E-02
  -.6141133E-02  -.6124058E-02  -.6109211E-02  -.6146258E-02  -.6239319E-02
  -.6345481E-02  -.6446243E-02  -.6537527E-02  -.6615070E-02  -.6660249E-02
  -.6662298E-02  -.6662564E-02  -.6708570E-02  -.6767055E-02  -.6841268E-02
  -.6923651E-02  -.6973719E-02  -.7021240E-02  -.7104874E-02  -.7208262E-02
  -.7313293E-02  -.7396314E-02  -.7406608E-02  -.7321515E-02  -.7185120E-02
  -.7043337E-02  -.6889542E-02  -.6697050E-02  -.6447685E-02  -.6181620E-02
  -.5948486E-02  -.5691372E-02  -.5346410E-02  -.4955561E-02  -.4585373E-02
  -.4230352E-02  -.3880280E-02  -.3583177E-02  -.3385871E-02  -.3286355E-02
  -.3250393E-02  -.3247723E-02  -.3289050E-02  -.3389471E-02  -.3502573E-02
  -.3600579E-02  -.3678945E-02  -.3712855E-02  -.3661360E-02  -.3526556E-02
  -.3398201E-02  -.3316734E-02  -.3243163E-02  -.3157509E-02  -.3056328E-02
  -.2971355E-02  -.2918349E-02  -.2910936E-02  -.2941325E-02  -.2984058E-02
  -.3021191E-02  -.3018493E-02  -.2936544E-02  -.2763167E-02  -.2550815E-02
  -.2346997E-02  -.2119324E-02  -.1825265E-02  -.1507672E-02  -.1221501E-02
  -.9696463E-03  -.6991979E-03  -.4246763E-03  -.2003973E-03  -.4344788E-04
   .2286535E-04   .3587234E-04   .5070059E-04   .7829733E-04   .1111651E-03
   .1199829E-03   .1027961E-03   .1364638E-03   .2380747E-03   .3533628E-03
   .4328353E-03   .4967553E-03   .6083115E-03   .7901129E-03   .1016950E-02
   .1254370E-02   .1509952E-02   .1778233E-02   .2042232E-02   .2291658E-02
   .2562856E-02   .2911449E-02   .3338955E-02   .3813755E-02   .4327778E-02
   .4895917E-02   .5483756E-02   .6058267E-02   .6639104E-02   .7263042E-02
   .7906459E-02   .8523003E-02   .9069420E-02   .9539817E-02   .9916477E-02
   .1018247E-01   .1036133E-01   .1048078E-01   .1053442E-01   .1051180E-01
   .1043449E-01   .1030844E-01   .1015879E-01   .9977618E-02   .9748295E-02
   .9474148E-02   .9189093E-02   .8944454E-02   .8721496E-02   .8470763E-02
   .8178898E-02   .7863127E-02   .7499229E-02   .7063860E-02   .6582076E-02
   .6123616E-02   .5733795E-02   .5367199E-02   .4982476E-02   .4569872E-02
   .4163523E-02   .3791910E-02   .3450215E-02   .3159449E-02   .2946423E-02
   .2822577E-02   .2775247E-02   .2762741E-02   .2764859E-02   .2777002E-02
   .2780018E-02   .2742790E-02   .2681620E-02   .2639151E-02   .2620634E-02
   .2623733E-02   .2636483E-02   .2625540E-02   .2582187E-02   .2546304E-02
   .2543282E-02   .2600917E-02   .2718928E-02   .2845169E-02   .2949916E-02
   .3041402E-02   .3100313E-02   .3087748E-02   .3040419E-02   .3014896E-02
   .3009620E-02   .3017719E-02   .3061985E-02   .3170069E-02   .3285705E-02
   .3361200E-02   .3404585E-02   .3417650E-02   .3418380E-02   .3419854E-02
   .3414606E-02   .3421968E-02   .3426141E-02   .3357181E-02   .3194894E-02
   .2991968E-02   .2771777E-02   .2523549E-02   .2249478E-02   .1982210E-02
   .1726289E-02   .1452609E-02   .1153718E-02   .8687710E-03   .6446662E-03
   .4587183E-03   .3015583E-03   .1974852E-03   .1425058E-03   .1033121E-03
   .5686508E-04   .2514358E-04   .5140092E-04   .1238887E-03   .2190806E-03
   .3415895E-03   .4761609E-03   .6175140E-03   .7761943E-03   .9383737E-03
   .1084159E-02   .1231194E-02   .1415241E-02   .1636910E-02   .1894333E-02
   .2199810E-02   .2538849E-02   .2885611E-02   .3214748E-02   .3501184E-02
   .3756650E-02   .4040710E-02   .4363176E-02   .4684480E-02   .4940731E-02
   .5110162E-02   .5232270E-02   .5350757E-02   .5453293E-02   .5523435E-02
   .5562878E-02   .5588524E-02   .5628402E-02   .5695157E-02   .5767989E-02
   .5855153E-02   .5991897E-02   .6197502E-02   .6478025E-02   .6794249E-02
   .7070715E-02   .7290094E-02   .7496138E-02   .7680536E-02   .7817654E-02
   .7880129E-02   .7842118E-02   .7727406E-02   .7577143E-02   .7439027E-02
   .7327209E-02   .7187155E-02   .7024261E-02   .6869935E-02   .6739097E-02
   .6664266E-02   .6642733E-02   .6653682E-02   .6688205E-02   .6733606E-02
   .6764419E-02   .6753374E-02   .6678894E-02   .6593204E-02   .6546440E-02
   .6503080E-02   .6459377E-02   .6412985E-02   .6350530E-02   .6287483E-02
   .6240036E-02   .6227760E-02   .6259358E-02   .6320552E-02   .6398457E-02
   .6476082E-02   .6534205E-02   .6558081E-02   .6546900E-02   .6496623E-02
   .6389664E-02   .6265378E-02   .6204599E-02   .6177405E-02   .6114165E-02
   .6015338E-02   .5919890E-02   .5842441E-02   .5767235E-02   .5717405E-02
   .5727678E-02   .5790660E-02   .5878637E-02   .5961704E-02   .6014827E-02
   .6028158E-02   .6052512E-02   .6136968E-02   .6294231E-02   .6457544E-02
   .6586795E-02   .6726196E-02   .6872385E-02   .6942563E-02   .6940228E-02
   .6945173E-02   .6999322E-02   .7111443E-02   .7265765E-02   .7420040E-02
   .7550742E-02   .7687866E-02   .7839497E-02   .7980709E-02   .8112424E-02
   .8260574E-02   .8447974E-02   .8667791E-02   .8887567E-02   .9115544E-02
   .9383026E-02   .9660146E-02   .9917277E-02   .1016843E-01   .1041111E-01
   .1061037E-01   .1076856E-01   .1090061E-01   .1098296E-01   .1096292E-01
   .1084655E-01   .1071823E-01   .1056907E-01   .1032642E-01   .9986782E-02
   .9604089E-02   .9236076E-02   .8896088E-02   .8543363E-02   .8177978E-02
   .7854401E-02   .7571429E-02   .7312327E-02   .7083407E-02   .6890155E-02
   .6749701E-02   .6690734E-02   .6741136E-02   .6869100E-02   .6996875E-02
   .7111269E-02   .7255430E-02   .7441758E-02   .7693428E-02   .8010937E-02
   .8358270E-02   .8707907E-02   .9044682E-02   .9345527E-02   .9607730E-02
   .9842441E-02   .1004868E-01   .1024387E-01   .1046872E-01   .1072740E-01
   .1097395E-01   .1122972E-01   .1149926E-01   .1174025E-01   .1192921E-01
   .1207532E-01   .1220532E-01   .1236652E-01   .1256351E-01   .1275689E-01
   .1293899E-01   .1312667E-01   .1331891E-01   .1349727E-01   .1361039E-01
   .1364073E-01   .1363649E-01   .1364312E-01   .1365060E-01   .1361296E-01
   .1349746E-01   .1328499E-01   .1297896E-01   .1264287E-01   .1230600E-01
   .1193577E-01   .1154102E-01   .1116797E-01   .1083054E-01   .1049147E-01
   .1012577E-01   .9767662E-02   .9454831E-02   .9219873E-02   .9070858E-02
   .8962656E-02   .8878619E-02   .8808796E-02   .8741162E-02   .8659107E-02
   .8555367E-02   .8444830E-02   .8362503E-02   .8283106E-02   .8170556E-02
   .8079679E-02   .8056784E-02   .8035355E-02   .7969134E-02   .7897657E-02
   .7860788E-02   .7853153E-02   .7843629E-02   .7799432E-02   .7708610E-02
   .7606165E-02   .7515511E-02   .7448175E-02   .7412333E-02   .7390604E-02
   .7344889E-02   .7291344E-02   .7260982E-02   .7238294E-02   .7195092E-02
   .7100115E-02   .6970147E-02   .6843983E-02   .6701787E-02   .6526732E-02
   .6332997E-02   .6131060E-02   .5918667E-02   .5702218E-02   .5461706E-02
   .5218955E-02   .5028147E-02   .4902133E-02   .4833946E-02   .4809639E-02
   .4801358E-02   .4779992E-02   .4758405E-02   .4747162E-02   .4704946E-02
   .4602378E-02   .4471953E-02   .4347886E-02   .4232954E-02   .4122356E-02
   .3999662E-02   .3863827E-02   .3696584E-02   .3478345E-02   .3242372E-02
   .3043449E-02   .2882396E-02   .2730313E-02   .2604830E-02   .2514642E-02
   .2441794E-02   .2367806E-02   .2288467E-02   .2255303E-02   .2300327E-02
   .2377967E-02   .2417553E-02   .2438316E-02   .2517260E-02   .2661806E-02
   .2815516E-02   .2942533E-02   .3073756E-02   .3265021E-02   .3505051E-02
   .3739155E-02   .3923947E-02   .4064635E-02   .4187671E-02   .4304365E-02
   .4420168E-02   .4551319E-02   .4709760E-02   .4885498E-02   .5065790E-02
   .5254415E-02   .5451897E-02   .5650658E-02   .5831488E-02   .6001032E-02
   .6173218E-02   .6320972E-02   .6410578E-02   .6482643E-02   .6550858E-02
   .6570918E-02   .6541379E-02   .6479359E-02   .6398062E-02   .6286555E-02
   .6197689E-02   .6168786E-02   .6124382E-02   .6005582E-02   .5859871E-02
   .5765666E-02   .5721022E-02   .5660891E-02   .5565406E-02   .5482449E-02
   .5443956E-02   .5427571E-02   .5410824E-02   .5369713E-02   .5295432E-02
   .5166657E-02   .4998959E-02   .4867587E-02   .4802290E-02   .4754357E-02
   .4663844E-02   .4568143E-02   .4528201E-02   .4538993E-02   .4575343E-02
   .4631072E-02   .4685144E-02   .4719065E-02   .4728671E-02   .4722320E-02
   .4727101E-02   .4761017E-02   .4808424E-02   .4818142E-02   .4775413E-02
   .4737614E-02   .4719077E-02   .4708102E-02   .4709147E-02   .4750372E-02
   .4865761E-02   .5054312E-02   .5275975E-02   .5505981E-02   .5724640E-02
   .5916418E-02   .6101418E-02   .6314676E-02   .6585497E-02   .6901786E-02
   .7239428E-02   .7597877E-02   .7964929E-02   .8300787E-02   .8565409E-02
   .8745496E-02   .8885605E-02   .9013153E-02   .9089937E-02   .9094282E-02
   .9061395E-02   .9003958E-02   .8910218E-02   .8764652E-02   .8571994E-02
   .8379233E-02   .8232714E-02   .8133516E-02   .8073791E-02   .8022369E-02
   .7956571E-02   .7856038E-02   .7690173E-02   .7480936E-02   .7283406E-02
   .7141468E-02   .7018847E-02   .6881507E-02   .6731115E-02   .6539105E-02
   .6262826E-02   .5936822E-02   .5642371E-02   .5390317E-02   .5166500E-02
   .4981058E-02   .4803905E-02   .4622291E-02   .4431469E-02   .4230090E-02
   .4043710E-02   .3906638E-02   .3856004E-02   .3849854E-02   .3825140E-02
   .3769738E-02   .3703593E-02   .3614403E-02   .3509243E-02   .3439426E-02
   .3400839E-02   .3358268E-02   .3281708E-02   .3151552E-02   .2944540E-02
   .2677122E-02   .2411910E-02   .2179514E-02   .1976724E-02   .1802148E-02
   .1635717E-02   .1456494E-02   .1321553E-02   .1254687E-02   .1176163E-02
   .1075590E-02   .1041965E-02   .1113384E-02   .1258629E-02   .1438525E-02
   .1633345E-02   .1817319E-02   .1971711E-02   .2093884E-02   .2221217E-02
   .2369971E-02   .2517065E-02   .2648160E-02   .2740857E-02   .2799292E-02
   .2824902E-02   .2796667E-02   .2743396E-02   .2700866E-02   .2675930E-02
   .2663383E-02   .2650651E-02   .2619078E-02   .2540306E-02   .2363461E-02
   .2119410E-02   .1897731E-02   .1753117E-02   .1650300E-02   .1491525E-02
   .1247126E-02   .9434524E-03   .6333569E-03   .3543092E-03   .9564823E-04
  -.1491312E-03  -.3861584E-03  -.6366754E-03  -.8817963E-03  -.1085182E-02
  -.1276439E-02  -.1486252E-02  -.1702131E-02  -.1911453E-02  -.2093791E-02
  -.2231839E-02  -.2319269E-02  -.2363217E-02  -.2408638E-02  -.2498714E-02
  -.2620095E-02  -.2720915E-02  -.2803784E-02  -.2889554E-02  -.2970743E-02
  -.3025559E-02  -.3018043E-02  -.2960783E-02  -.2887769E-02  -.2777537E-02
  -.2578727E-02  -.2304457E-02  -.2016187E-02  -.1746095E-02  -.1501397E-02
  -.1259931E-02  -.1008904E-02  -.7708248E-03  -.5549115E-03  -.3596398E-03
  -.1996382E-03  -.9405671E-04  -.3532038E-04   .7709674E-05   .5718489E-04
   .1306754E-03   .2641514E-03   .4175387E-03   .5308219E-03   .5938160E-03
   .6247352E-03   .6619540E-03   .7146499E-03   .7808023E-03   .8575732E-03
   .9433418E-03   .1027170E-02   .1091025E-02   .1120603E-02   .1121533E-02
   .1125630E-02   .1134241E-02   .1111255E-02   .1056573E-02   .9586652E-03
   .8229107E-03   .6635880E-03   .4707606E-03   .2587130E-03   .6834540E-04
  -.1004064E-03  -.3113950E-03  -.6195075E-03  -.1020597E-02  -.1464459E-02
  -.1909132E-02  -.2353353E-02  -.2800121E-02  -.3242023E-02  -.3693249E-02
  -.4180526E-02  -.4690698E-02  -.5172887E-02  -.5607625E-02  -.6025447E-02
  -.6435461E-02  -.6815165E-02  -.7138839E-02  -.7392119E-02  -.7608600E-02
  -.7822263E-02  -.8055395E-02  -.8297462E-02  -.8507245E-02  -.8693077E-02
  -.8860423E-02  -.8975894E-02  -.9034103E-02  -.9074005E-02  -.9117165E-02
  -.9155661E-02  -.9140412E-02  -.9066519E-02  -.8930954E-02  -.8716461E-02
  -.8445618E-02  -.8171175E-02  -.7936828E-02  -.7701545E-02  -.7426095E-02
  -.7134435E-02  -.6857276E-02  -.6590041E-02  -.6331326E-02  -.6063110E-02
  -.5761975E-02  -.5487200E-02  -.5309330E-02  -.5186746E-02  -.5072291E-02
  -.4981071E-02  -.4914066E-02  -.4857971E-02  -.4786384E-02  -.4677479E-02
  -.4544540E-02  -.4426591E-02  -.4352064E-02  -.4343076E-02  -.4387430E-02
  -.4387046E-02  -.4320456E-02  -.4239812E-02  -.4171129E-02  -.4157123E-02
  -.4225319E-02  -.4337158E-02  -.4436359E-02  -.4474179E-02  -.4444442E-02
  -.4366351E-02  -.4270624E-02  -.4186695E-02  -.4115924E-02  -.4039196E-02
  -.3965286E-02  -.3907643E-02  -.3851482E-02  -.3778630E-02  -.3722940E-02
  -.3706948E-02  -.3685173E-02  -.3638685E-02  -.3590092E-02  -.3545439E-02
  -.3528683E-02  -.3534573E-02  -.3537817E-02  -.3537299E-02  -.3509997E-02
  -.3431891E-02  -.3270986E-02  -.3008274E-02  -.2695688E-02  -.2371611E-02
  -.2044022E-02  -.1691264E-02  -.1325583E-02  -.9684528E-03  -.6413802E-03
  -.3449307E-03  -.5222426E-04   .2062556E-03   .3965690E-03   .5210941E-03
   .5917537E-03   .6330901E-03   .6388058E-03   .6210536E-03   .6139981E-03
   .6498979E-03   .7642577E-03   .9491427E-03   .1175257E-02   .1368821E-02
   .1554859E-02   .1796051E-02   .2061242E-02   .2266419E-02   .2408307E-02
   .2538298E-02   .2681309E-02   .2801829E-02   .2835009E-02   .2774786E-02
   .2668537E-02   .2536593E-02   .2366424E-02   .2148458E-02   .1898634E-02
   .1655586E-02   .1424963E-02   .1171958E-02   .8678714E-03   .5034983E-03
   .1038149E-03  -.2819185E-03  -.6115376E-03  -.8783870E-03  -.1076813E-02
  -.1235103E-02  -.1389445E-02  -.1553378E-02  -.1737476E-02  -.1959513E-02
  -.2196046E-02  -.2395313E-02  -.2566763E-02  -.2743922E-02  -.2941289E-02
  -.3160824E-02  -.3368533E-02  -.3581443E-02  -.3819757E-02  -.4021271E-02
  -.4138536E-02  -.4172009E-02  -.4148640E-02  -.4119304E-02  -.4101956E-02
  -.4090633E-02  -.4095017E-02  -.4119464E-02  -.4164753E-02  -.4204043E-02
  -.4232060E-02  -.4241764E-02  -.4231572E-02  -.4229129E-02  -.4246475E-02
  -.4284556E-02  -.4347658E-02  -.4408136E-02  -.4423264E-02  -.4375386E-02
  -.4316601E-02  -.4305914E-02  -.4360343E-02  -.4451846E-02  -.4550711E-02
  -.4657442E-02  -.4783022E-02  -.4914925E-02  -.5050636E-02  -.5168171E-02
  -.5273206E-02  -.5395083E-02  -.5494782E-02  -.5511035E-02  -.5467476E-02
  -.5455529E-02  -.5491050E-02  -.5519805E-02  -.5544652E-02  -.5574534E-02
  -.5616207E-02  -.5681887E-02  -.5786076E-02  -.5918990E-02  -.6060669E-02
  -.6231557E-02  -.6422180E-02  -.6589985E-02  -.6686065E-02  -.6730116E-02
  -.6814712E-02  -.6931970E-02  -.7047233E-02  -.7186010E-02  -.7350055E-02
  -.7513391E-02  -.7648446E-02  -.7736391E-02  -.7784136E-02  -.7813846E-02
  -.7836842E-02  -.7871448E-02  -.7900735E-02  -.7877368E-02  -.7812419E-02
  -.7708407E-02  -.7526217E-02  -.7254210E-02  -.6936514E-02  -.6602950E-02
  -.6247893E-02  -.5870227E-02  -.5487298E-02  -.5124747E-02  -.4781461E-02
  -.4448401E-02  -.4128648E-02  -.3844139E-02  -.3630648E-02  -.3479110E-02
  -.3306741E-02  -.3056147E-02  -.2733501E-02  -.2378728E-02  -.2012439E-02
  -.1639031E-02  -.1221748E-02  -.7454557E-03  -.2763508E-03   .1266027E-03
   .4639101E-03   .7435864E-03   .9884400E-03   .1204712E-02   .1363365E-02
   .1483596E-02   .1611892E-02   .1754169E-02   .1917323E-02   .2056651E-02
   .2115609E-02   .2109400E-02   .2063700E-02   .2008516E-02   .1983089E-02
   .2008185E-02   .2025420E-02   .1974640E-02   .1858698E-02   .1721503E-02
   .1594172E-02   .1450382E-02   .1310787E-02   .1175788E-02   .1025800E-02
   .9035163E-03   .7871175E-03   .5938319E-03   .3174108E-03   .1855483E-04
  -.2829683E-03  -.5873129E-03  -.8700043E-03  -.1141135E-02  -.1423482E-02
  -.1721267E-02  -.1982644E-02  -.2184183E-02  -.2379309E-02  -.2550117E-02
  -.2682467E-02  -.2780035E-02  -.2819543E-02  -.2820719E-02  -.2833254E-02
  -.2863210E-02  -.2883056E-02  -.2873689E-02  -.2808163E-02  -.2659292E-02
  -.2461986E-02  -.2272351E-02  -.2125175E-02  -.2042373E-02  -.2001003E-02
  -.1947671E-02  -.1890014E-02  -.1889829E-02  -.1946630E-02  -.2021877E-02
  -.2107896E-02  -.2184706E-02  -.2280169E-02  -.2435689E-02  -.2627533E-02
  -.2782256E-02  -.2864893E-02  -.2925892E-02  -.3029357E-02  -.3161762E-02
  -.3289133E-02  -.3434128E-02  -.3620059E-02  -.3837882E-02  -.4049711E-02
  -.4222805E-02  -.4385443E-02  -.4581567E-02  -.4798808E-02  -.5002506E-02
  -.5189923E-02  -.5359608E-02  -.5518480E-02  -.5698174E-02  -.5913292E-02
  -.6125711E-02  -.6277801E-02  -.6388119E-02  -.6534770E-02  -.6744008E-02
  -.6958023E-02  -.7150406E-02  -.7354608E-02  -.7556288E-02  -.7712921E-02
  -.7832841E-02  -.7945552E-02  -.8051965E-02  -.8119735E-02  -.8144400E-02
  -.8158100E-02  -.8162829E-02  -.8127408E-02  -.8061844E-02  -.7974516E-02
  -.7878177E-02  -.7789637E-02  -.7725620E-02  -.7662445E-02  -.7605855E-02
  -.7594708E-02  -.7624066E-02  -.7678625E-02  -.7742036E-02  -.7800614E-02
  -.7880727E-02  -.8046016E-02  -.8279329E-02  -.8547929E-02  -.8848056E-02
  -.9159667E-02  -.9505708E-02  -.9916283E-02  -.1035346E-01  -.1077336E-01
  -.1114386E-01  -.1147249E-01  -.1180044E-01  -.1211718E-01  -.1240898E-01
  -.1272440E-01  -.1306658E-01  -.1336564E-01  -.1357288E-01  -.1370073E-01
  -.1375952E-01  -.1374925E-01  -.1368298E-01  -.1357826E-01  -.1344198E-01
  -.1329648E-01  -.1311409E-01  -.1286068E-01  -.1255210E-01  -.1218875E-01
  -.1176297E-01  -.1130395E-01  -.1087597E-01  -.1049151E-01  -.1009103E-01
  -.9658650E-02  -.9261183E-02  -.8982012E-02  -.8821710E-02  -.8695210E-02
  -.8547252E-02  -.8414004E-02  -.8366624E-02  -.8386239E-02  -.8411076E-02
  -.8415156E-02  -.8405632E-02  -.8372022E-02  -.8336361E-02  -.8353949E-02
  -.8416871E-02  -.8442104E-02  -.8369650E-02  -.8233463E-02  -.8090492E-02
  -.7961917E-02  -.7845284E-02  -.7713856E-02  -.7557998E-02  -.7391171E-02
  -.7202892E-02  -.6988874E-02  -.6773062E-02  -.6588861E-02  -.6440250E-02
  -.6294299E-02  -.6135687E-02  -.5976561E-02  -.5808729E-02  -.5618025E-02
  -.5444401E-02  -.5288410E-02  -.5115860E-02  -.4920644E-02  -.4681624E-02
  -.4407953E-02  -.4132177E-02  -.3898079E-02  -.3711718E-02  -.3525150E-02
  -.3315607E-02  -.3093946E-02  -.2867425E-02  -.2679656E-02  -.2526289E-02
  -.2362578E-02  -.2186520E-02  -.2010613E-02  -.1836826E-02  -.1678228E-02
  -.1564422E-02  -.1514246E-02  -.1512002E-02  -.1518895E-02  -.1493391E-02
  -.1418481E-02  -.1336731E-02  -.1297961E-02  -.1301510E-02  -.1314132E-02
  -.1321443E-02  -.1353357E-02  -.1422951E-02  -.1499693E-02  -.1539835E-02
  -.1514278E-02  -.1437255E-02  -.1386564E-02  -.1383424E-02  -.1379443E-02
  -.1370307E-02  -.1392837E-02  -.1475887E-02  -.1605914E-02  -.1700961E-02
  -.1698960E-02  -.1606065E-02  -.1514882E-02  -.1515812E-02  -.1604789E-02
  -.1704087E-02  -.1771262E-02  -.1802161E-02  -.1786583E-02  -.1728916E-02
  -.1637908E-02  -.1477413E-02  -.1239719E-02  -.1004061E-02  -.8346483E-03
  -.7044832E-03  -.5497202E-03  -.3428401E-03  -.1139542E-03   .9024287E-04
   .2550236E-03   .4150097E-03   .5762434E-03   .6866821E-03   .7366302E-03
   .7857059E-03   .8897329E-03   .1062980E-02   .1248733E-02   .1373586E-02
   .1459457E-02   .1520372E-02   .1538833E-02   .1524464E-02   .1509833E-02
   .1519781E-02   .1531244E-02   .1518734E-02   .1462949E-02   .1324999E-02
   .1145787E-02   .1009857E-02   .9284145E-03   .8617800E-03   .7769025E-03
   .6775599E-03   .5813364E-03   .5123556E-03   .4707833E-03   .4296620E-03
   .3773648E-03   .3197125E-03   .2186712E-03   .4300182E-04  -.1851190E-03
  -.4205147E-03  -.6644310E-03  -.9589952E-03  -.1307223E-02  -.1636333E-02
  -.1869877E-02  -.2029176E-02  -.2171256E-02  -.2320141E-02  -.2448268E-02
  -.2530739E-02  -.2592556E-02  -.2662858E-02  -.2749830E-02  -.2836691E-02
  -.2900289E-02  -.2927018E-02  -.2921726E-02  -.2911742E-02  -.2940439E-02
  -.3008527E-02  -.3068252E-02  -.3090098E-02  -.3050887E-02  -.2944688E-02
  -.2800679E-02  -.2663166E-02  -.2573655E-02  -.2535246E-02  -.2534582E-02
  -.2557450E-02  -.2606671E-02  -.2681450E-02  -.2774907E-02  -.2879043E-02
  -.2975086E-02  -.3059577E-02  -.3133644E-02  -.3194879E-02  -.3242635E-02
  -.3267875E-02  -.3277805E-02  -.3323055E-02  -.3417652E-02  -.3531061E-02
  -.3649222E-02  -.3790657E-02  -.3939130E-02  -.4079362E-02  -.4214834E-02
  -.4332901E-02  -.4479705E-02  -.4669415E-02  -.4871520E-02  -.5098977E-02
  -.5334029E-02  -.5501780E-02  -.5574673E-02  -.5610805E-02  -.5662336E-02
  -.5723211E-02  -.5757176E-02  -.5746249E-02  -.5698761E-02  -.5646161E-02
  -.5611373E-02  -.5581061E-02  -.5545454E-02  -.5518286E-02  -.5522128E-02
  -.5564913E-02  -.5642335E-02  -.5751608E-02  -.5903852E-02  -.6098471E-02
  -.6318282E-02  -.6507589E-02  -.6633352E-02  -.6702340E-02  -.6759097E-02
  -.6817581E-02  -.6864904E-02  -.6920087E-02  -.6993446E-02  -.7044964E-02
  -.7066728E-02  -.7072243E-02  -.7050395E-02  -.7002901E-02  -.6947038E-02
  -.6911726E-02  -.6887736E-02  -.6835616E-02  -.6743267E-02  -.6654049E-02
  -.6569871E-02  -.6463645E-02  -.6323482E-02  -.6171854E-02  -.6025056E-02
  -.5889342E-02  -.5743312E-02  -.5549438E-02  -.5317917E-02  -.5094573E-02
  -.4905673E-02  -.4690636E-02  -.4359082E-02  -.3935762E-02  -.3509099E-02
  -.3153414E-02  -.2874991E-02  -.2604973E-02  -.2307567E-02  -.2002866E-02
  -.1737435E-02  -.1526402E-02  -.1343264E-02  -.1196318E-02  -.1080991E-02
  -.9824342E-03  -.8929497E-03  -.7906261E-03  -.6925116E-03  -.6240399E-03
  -.5710552E-03  -.4952255E-03  -.3787188E-03  -.2516796E-03  -.1736265E-03
  -.1502904E-03  -.1861763E-03  -.2645430E-03  -.3132893E-03  -.3057659E-03
  -.2861661E-03  -.2795131E-03  -.2965889E-03  -.3515055E-03  -.4298152E-03
  -.5397708E-03  -.6662347E-03  -.7651872E-03  -.8234394E-03  -.8713137E-03
  -.9607173E-03  -.1094312E-02  -.1216376E-02  -.1297006E-02  -.1379057E-02
  -.1498020E-02  -.1636288E-02  -.1761383E-02  -.1847069E-02  -.1888401E-02
  -.1917093E-02  -.1935318E-02  -.1928266E-02  -.1910012E-02  -.1911793E-02
  -.1928884E-02  -.1930629E-02  -.1925172E-02  -.1885037E-02  -.1780776E-02
  -.1651944E-02  -.1552183E-02  -.1496101E-02  -.1489007E-02  -.1516884E-02
  -.1522815E-02  -.1491720E-02  -.1434947E-02  -.1378128E-02  -.1345017E-02
  -.1325390E-02  -.1330167E-02  -.1398569E-02  -.1512621E-02  -.1607886E-02
  -.1643231E-02  -.1637613E-02  -.1655758E-02  -.1729619E-02  -.1849537E-02
  -.1977388E-02  -.2092654E-02  -.2178142E-02  -.2244898E-02  -.2324665E-02
  -.2409924E-02  -.2460191E-02  -.2467467E-02  -.2487569E-02  -.2571998E-02
  -.2711315E-02  -.2825637E-02  -.2859445E-02  -.2851661E-02  -.2863778E-02
  -.2891964E-02  -.2889561E-02  -.2844089E-02  -.2764244E-02  -.2669548E-02
  -.2587710E-02  -.2528395E-02  -.2463541E-02  -.2413824E-02  -.2392806E-02
  -.2367918E-02  -.2330674E-02  -.2296335E-02  -.2268686E-02  -.2253937E-02
  -.2245081E-02  -.2246312E-02  -.2275073E-02  -.2328920E-02  -.2390196E-02
  -.2445278E-02  -.2491225E-02  -.2513608E-02  -.2498836E-02  -.2467749E-02
  -.2428127E-02  -.2401171E-02  -.2407379E-02  -.2398586E-02  -.2342933E-02
  -.2279120E-02  -.2202145E-02  -.2073189E-02  -.1922633E-02  -.1812292E-02
  -.1773213E-02  -.1785505E-02  -.1791994E-02  -.1800481E-02  -.1821482E-02
  -.1855096E-02  -.1926301E-02  -.2018993E-02  -.2125928E-02  -.2262300E-02
  -.2412964E-02  -.2554913E-02  -.2703922E-02  -.2875753E-02  -.3099679E-02
  -.3366615E-02  -.3613011E-02  -.3802164E-02  -.3951335E-02  -.4082881E-02
  -.4201183E-02  -.4313324E-02  -.4425668E-02  -.4505587E-02  -.4554553E-02
  -.4579680E-02  -.4579453E-02  -.4537124E-02  -.4443799E-02  -.4303900E-02
  -.4140758E-02  -.3982362E-02  -.3826788E-02  -.3663439E-02  -.3473856E-02
  -.3248952E-02  -.2973880E-02  -.2668857E-02  -.2372149E-02  -.2084145E-02
  -.1825282E-02  -.1604910E-02  -.1416832E-02  -.1285807E-02  -.1197623E-02
  -.1086119E-02  -.9104378E-03  -.6936881E-03  -.5184012E-03  -.3908917E-03
  -.2256908E-03  -.1880121E-04   .1611203E-03   .3265621E-03   .5243231E-03
   .7489949E-03   .9381187E-03   .1045969E-02   .1052417E-02   .9726787E-03
   .8442681E-03   .7113217E-03   .5890340E-03   .4756327E-03   .3591547E-03
   .2476683E-03   .1583273E-03   .5821935E-04  -.7820389E-04  -.2088228E-03
  -.3086236E-03  -.3790727E-03  -.4370704E-03  -.4831775E-03  -.5044433E-03
  -.5187337E-03  -.5609247E-03  -.6502612E-03  -.7327533E-03  -.7617331E-03
  -.7426104E-03  -.7181984E-03  -.7040833E-03  -.6830614E-03  -.6272753E-03
  -.5318930E-03  -.3943595E-03  -.1961655E-03   .6728087E-04   .3613694E-03
   .6597234E-03   .9672731E-03   .1249019E-02   .1461652E-02   .1646027E-02
   .1852194E-02   .2086033E-02   .2328306E-02   .2554230E-02   .2757041E-02
   .2912862E-02   .2998572E-02   .3022108E-02   .3008868E-02   .2988188E-02
   .3013449E-02   .3084961E-02   .3153096E-02   .3194872E-02   .3248175E-02
   .3318033E-02   .3361039E-02   .3361120E-02   .3341210E-02   .3327804E-02
   .3333332E-02   .3372983E-02   .3433189E-02   .3512901E-02   .3656925E-02
   .3894292E-02   .4185361E-02   .4476783E-02   .4741379E-02   .4983814E-02
   .5235684E-02   .5521656E-02   .5850816E-02   .6227595E-02   .6636300E-02
   .7045565E-02   .7445060E-02   .7806877E-02   .8115546E-02   .8370436E-02
   .8613753E-02   .8933724E-02   .9353994E-02   .9823755E-02   .1027490E-01
   .1065981E-01   .1096002E-01   .1120926E-01   .1145847E-01   .1171049E-01
   .1192827E-01   .1208927E-01   .1218653E-01   .1223147E-01   .1225496E-01
   .1227152E-01   .1224023E-01   .1212742E-01   .1196162E-01   .1178196E-01
   .1157511E-01   .1135273E-01   .1115716E-01   .1099017E-01   .1082957E-01
   .1065736E-01   .1047793E-01   .1030513E-01   .1018358E-01   .1013955E-01
   .1010765E-01   .1005632E-01   .1001427E-01   .9995361E-02   .9989555E-02
   .9996344E-02   .1001968E-01   .1003945E-01   .1003764E-01   .1003741E-01
   .1006991E-01   .1010352E-01   .1011340E-01   .1011487E-01   .1009887E-01
   .1005069E-01   .1000757E-01   .1000970E-01   .1003230E-01   .1001597E-01
   .9941569E-02   .9836695E-02   .9719799E-02   .9593467E-02   .9466418E-02
   .9324874E-02   .9140040E-02   .8887137E-02   .8572321E-02   .8232546E-02
   .7903384E-02   .7603018E-02   .7315803E-02   .7010277E-02   .6676945E-02
   .6363363E-02   .6103990E-02   .5865656E-02   .5591099E-02   .5296049E-02
   .5030490E-02   .4818866E-02   .4676768E-02   .4580965E-02   .4442145E-02
   .4228961E-02   .4008357E-02   .3830075E-02   .3682740E-02   .3525541E-02
   .3391480E-02   .3344261E-02   .3361076E-02   .3389775E-02   .3395634E-02
   .3364122E-02   .3354980E-02   .3403822E-02   .3490131E-02   .3583857E-02
   .3697053E-02   .3865516E-02   .4075090E-02   .4283806E-02   .4474145E-02
   .4627498E-02   .4755201E-02   .4889747E-02   .5010497E-02   .5084371E-02
   .5153930E-02   .5237100E-02   .5304993E-02   .5350212E-02   .5377315E-02
   .5362279E-02   .5301351E-02   .5215305E-02   .5134352E-02   .5055723E-02
   .4955217E-02   .4841036E-02   .4728736E-02   .4631786E-02   .4546302E-02
   .4448394E-02   .4360884E-02   .4294270E-02   .4231371E-02   .4176629E-02
   .4124891E-02   .4055198E-02   .3972041E-02   .3871302E-02   .3759838E-02
   .3664441E-02   .3597214E-02   .3556984E-02   .3525379E-02   .3492114E-02
   .3449201E-02   .3394745E-02   .3340458E-02   .3281054E-02   .3220172E-02
   .3168999E-02   .3132055E-02   .3099721E-02   .3072877E-02   .3073111E-02
   .3091700E-02   .3081263E-02   .3014872E-02   .2950742E-02   .2959737E-02
   .3050354E-02   .3184881E-02   .3325373E-02   .3432233E-02   .3527307E-02
   .3678653E-02   .3908928E-02   .4192115E-02   .4489102E-02   .4767911E-02
   .5032479E-02   .5307434E-02   .5596444E-02   .5883941E-02   .6189583E-02
   .6511404E-02   .6794161E-02   .7044418E-02   .7347172E-02   .7718725E-02
   .8104712E-02   .8438768E-02   .8709144E-02   .8969893E-02   .9273865E-02
   .9579216E-02   .9822646E-02   .9991675E-02   .1010707E-01   .1022882E-01
   .1035500E-01   .1045810E-01   .1050600E-01   .1046521E-01   .1037041E-01
   .1027000E-01   .1015540E-01   .1002204E-01   .9886199E-02   .9772917E-02
   .9690164E-02   .9583383E-02   .9431076E-02   .9254579E-02   .9093548E-02
   .8994837E-02   .8927719E-02   .8850387E-02   .8750925E-02   .8642625E-02
   .8543454E-02   .8437020E-02   .8292388E-02   .8114641E-02   .7928757E-02
   .7750397E-02   .7556626E-02   .7327565E-02   .7092514E-02   .6858190E-02
   .6619765E-02   .6372619E-02   .6098157E-02   .5788741E-02   .5464268E-02
   .5157013E-02   .4874342E-02   .4623002E-02   .4406226E-02   .4202227E-02
   .4019375E-02   .3903308E-02   .3853374E-02   .3817100E-02   .3764303E-02
   .3729963E-02   .3747974E-02   .3793226E-02   .3830674E-02   .3852265E-02
   .3891073E-02   .3978117E-02   .4089873E-02   .4161728E-02   .4217634E-02
   .4331748E-02   .4480109E-02   .4626886E-02   .4771582E-02   .4940752E-02
   .5139429E-02   .5289903E-02   .5333247E-02   .5320568E-02   .5351670E-02
   .5470851E-02   .5632340E-02   .5768716E-02   .5846192E-02   .5871977E-02
   .5897010E-02   .5951209E-02   .6021340E-02   .6095891E-02   .6168998E-02
   .6247710E-02   .6335354E-02   .6398568E-02   .6408268E-02   .6381045E-02
   .6335363E-02   .6247579E-02   .6159730E-02   .6113124E-02   .6085509E-02
   .6068302E-02   .6055979E-02   .6007394E-02   .5902729E-02   .5788058E-02
   .5704155E-02   .5679453E-02   .5691182E-02   .5712109E-02   .5753127E-02
   .5801831E-02   .5848733E-02   .5909747E-02   .5958128E-02   .6014546E-02
   .6126774E-02   .6287761E-02   .6418749E-02   .6503443E-02   .6567122E-02
   .6628466E-02   .6692363E-02   .6750740E-02   .6820623E-02   .6925414E-02
   .7035845E-02   .7087435E-02   .7055738E-02   .6987044E-02   .6932074E-02
   .6882853E-02   .6827993E-02   .6725463E-02   .6573431E-02   .6452979E-02
   .6386724E-02   .6325852E-02   .6225854E-02   .6093080E-02   .5979397E-02
   .5898749E-02   .5843425E-02   .5804255E-02   .5747525E-02   .5655215E-02
   .5541884E-02   .5451566E-02   .5413505E-02   .5410209E-02   .5416054E-02
   .5444042E-02   .5495081E-02   .5522548E-02   .5526918E-02   .5575904E-02
   .5690550E-02   .5806317E-02   .5854951E-02   .5832036E-02   .5772705E-02
   .5726315E-02   .5737623E-02   .5787744E-02   .5831849E-02   .5840719E-02
   .5810120E-02   .5770168E-02   .5726883E-02   .5695880E-02   .5698536E-02
   .5708023E-02   .5711031E-02   .5723917E-02   .5738696E-02   .5722346E-02
   .5677941E-02   .5626676E-02   .5546578E-02   .5425180E-02   .5275791E-02
   .5128218E-02   .4986329E-02   .4842955E-02   .4721606E-02   .4654264E-02
   .4631264E-02   .4595619E-02   .4529816E-02   .4470110E-02   .4480025E-02
   .4549012E-02   .4616649E-02   .4659606E-02   .4686003E-02   .4682360E-02
   .4634991E-02   .4573827E-02   .4533068E-02   .4497862E-02   .4415748E-02
   .4246714E-02   .4009674E-02   .3741990E-02   .3486557E-02   .3260058E-02
   .3012744E-02   .2731183E-02   .2483913E-02   .2324409E-02   .2231890E-02
   .2144382E-02   .2061665E-02   .1992919E-02   .1924635E-02   .1851574E-02
   .1784710E-02   .1763662E-02   .1816760E-02   .1913218E-02   .1989908E-02
   .2012721E-02   .2031418E-02   .2095340E-02   .2231941E-02   .2410626E-02
   .2617776E-02   .2884576E-02   .3178966E-02   .3414754E-02   .3570125E-02
   .3697501E-02   .3836702E-02   .4007710E-02   .4196685E-02   .4368745E-02
   .4531141E-02   .4701384E-02   .4860299E-02   .4978540E-02   .5036159E-02
   .5049949E-02   .5051077E-02   .5061641E-02   .5079779E-02   .5095701E-02
   .5084047E-02   .5035083E-02   .4987530E-02   .4962461E-02   .4956722E-02
   .4941136E-02   .4892385E-02   .4821697E-02   .4724068E-02   .4595723E-02
   .4436764E-02   .4285600E-02   .4155821E-02   .4024567E-02   .3891183E-02
   .3787047E-02   .3706313E-02   .3611205E-02   .3501886E-02   .3408879E-02
   .3354397E-02   .3315424E-02   .3241658E-02   .3127694E-02   .3035649E-02
   .2979710E-02   .2915297E-02   .2798308E-02   .2634148E-02   .2448349E-02
   .2242404E-02   .2028605E-02   .1838674E-02   .1674091E-02   .1502458E-02
   .1303590E-02   .1120188E-02   .9801300E-03   .8443851E-03   .7218224E-03
   .6527188E-03   .6099957E-03   .5563170E-03   .5143850E-03   .4879094E-03
   .4429153E-03   .3929583E-03   .3565910E-03   .3170666E-03   .2661780E-03
   .2329296E-03   .2139508E-03   .1632518E-03   .6967736E-04  -.3941017E-04
  -.1202484E-03  -.1657441E-03  -.2029298E-03  -.2415770E-03  -.2875667E-03
  -.3632700E-03  -.4739220E-03  -.5897714E-03  -.6915484E-03  -.7724778E-03
  -.8226364E-03  -.8553631E-03  -.9052629E-03  -.1005473E-02  -.1124746E-02
  -.1179599E-02  -.1146648E-02  -.1096758E-02  -.1065789E-02  -.1004262E-02
  -.9068610E-03  -.8356256E-03  -.7878306E-03  -.7445742E-03  -.7358253E-03
  -.7740398E-03  -.8140095E-03  -.8313284E-03  -.8412936E-03  -.8726485E-03
  -.9505144E-03  -.1074311E-02  -.1228961E-02  -.1386315E-02  -.1516544E-02
  -.1593575E-02  -.1629867E-02  -.1662044E-02  -.1698665E-02  -.1746101E-02
  -.1836821E-02  -.1978356E-02  -.2138478E-02  -.2258100E-02  -.2336123E-02
  -.2434565E-02  -.2574415E-02  -.2733869E-02  -.2920007E-02  -.3111985E-02
  -.3254016E-02  -.3344400E-02  -.3425387E-02  -.3516049E-02  -.3607654E-02
  -.3681529E-02  -.3750256E-02  -.3802966E-02  -.3827248E-02  -.3829382E-02
  -.3800146E-02  -.3724879E-02  -.3630489E-02  -.3582097E-02  -.3593975E-02
  -.3618455E-02  -.3602543E-02  -.3542776E-02  -.3479999E-02  -.3441644E-02
  -.3433871E-02  -.3443246E-02  -.3492127E-02  -.3604916E-02  -.3764118E-02
  -.3931987E-02  -.4108255E-02  -.4316870E-02  -.4563997E-02  -.4854072E-02
  -.5182839E-02  -.5562704E-02  -.5993239E-02  -.6455421E-02  -.6919845E-02
  -.7331581E-02  -.7679899E-02  -.8012022E-02  -.8340503E-02  -.8678881E-02
  -.9039148E-02  -.9365485E-02  -.9629089E-02  -.9865776E-02  -.1008434E-01
  -.1025560E-01  -.1039422E-01  -.1055764E-01  -.1073055E-01  -.1087771E-01
  -.1100371E-01  -.1110724E-01  -.1118705E-01  -.1125310E-01  -.1134035E-01
  -.1146849E-01  -.1158767E-01  -.1164902E-01  -.1170244E-01  -.1178651E-01
  -.1186141E-01  -.1186837E-01  -.1181367E-01  -.1174564E-01  -.1167727E-01
  -.1161864E-01  -.1155074E-01  -.1144016E-01  -.1128515E-01  -.1110724E-01
  -.1093966E-01  -.1076355E-01  -.1054820E-01  -.1033874E-01  -.1018898E-01
  -.1010986E-01  -.1006298E-01  -.1001010E-01  -.9956937E-02  -.9881448E-02
  -.9779439E-02  -.9700583E-02  -.9648283E-02  -.9600769E-02  -.9567386E-02
  -.9574710E-02  -.9597788E-02  -.9602305E-02  -.9573950E-02  -.9530109E-02
  -.9510156E-02  -.9516327E-02  -.9518263E-02  -.9511124E-02  -.9538798E-02
  -.9606577E-02  -.9690477E-02  -.9740688E-02  -.9752438E-02  -.9795998E-02
  -.9902798E-02  -.1004254E-01  -.1019568E-01  -.1035139E-01  -.1051173E-01
  -.1066383E-01  -.1078960E-01  -.1089257E-01  -.1094628E-01  -.1094973E-01
  -.1094781E-01  -.1097605E-01  -.1103677E-01  -.1108687E-01  -.1108919E-01
  -.1104623E-01  -.1096713E-01  -.1087581E-01  -.1078018E-01  -.1068320E-01
  -.1060176E-01  -.1051866E-01  -.1040562E-01  -.1027492E-01  -.1013357E-01
  -.9936214E-02  -.9668905E-02  -.9398854E-02  -.9207905E-02  -.9093662E-02
  -.8990749E-02  -.8854318E-02  -.8680038E-02  -.8502872E-02  -.8359812E-02
  -.8235194E-02  -.8113599E-02  -.8011904E-02  -.7944367E-02  -.7881523E-02
  -.7792251E-02  -.7682726E-02  -.7614285E-02  -.7637307E-02  -.7703493E-02
  -.7740938E-02  -.7763604E-02  -.7817674E-02  -.7880225E-02  -.7904776E-02
  -.7899448E-02  -.7886217E-02  -.7865665E-02  -.7858644E-02  -.7858761E-02
  -.7842284E-02  -.7816085E-02  -.7800016E-02  -.7773907E-02  -.7739132E-02
  -.7709513E-02  -.7669042E-02  -.7633938E-02  -.7604071E-02  -.7568179E-02
  -.7498027E-02  -.7402555E-02  -.7313008E-02  -.7223163E-02  -.7126666E-02
  -.7026073E-02  -.6906140E-02  -.6769277E-02  -.6612701E-02  -.6418072E-02
  -.6211765E-02  -.6045590E-02  -.5950302E-02  -.5874628E-02  -.5720659E-02
  -.5500424E-02  -.5312151E-02  -.5174284E-02  -.5039967E-02  -.4910266E-02
  -.4782451E-02  -.4629870E-02  -.4459897E-02  -.4309780E-02  -.4214301E-02
  -.4146569E-02  -.4056187E-02  -.3941821E-02  -.3821852E-02  -.3703319E-02
  -.3598064E-02  -.3519103E-02  -.3472364E-02  -.3432833E-02  -.3372108E-02
  -.3333221E-02  -.3341172E-02  -.3361095E-02  -.3393626E-02  -.3436094E-02
  -.3499897E-02  -.3585595E-02  -.3668071E-02  -.3750984E-02  -.3863723E-02
  -.4003946E-02  -.4142719E-02  -.4283611E-02  -.4448971E-02  -.4607962E-02
  -.4724682E-02  -.4818197E-02  -.4924063E-02  -.5027269E-02  -.5116112E-02
  -.5180893E-02  -.5218888E-02  -.5250816E-02  -.5281555E-02  -.5271120E-02
  -.5222649E-02  -.5210243E-02  -.5276120E-02  -.5421964E-02  -.5617667E-02
  -.5825312E-02  -.5998354E-02  -.6111961E-02  -.6216742E-02  -.6348922E-02
  -.6497559E-02  -.6671597E-02  -.6859947E-02  -.7048089E-02  -.7219723E-02
  -.7327430E-02  -.7358640E-02  -.7341806E-02  -.7299228E-02  -.7245082E-02
  -.7170137E-02  -.7074189E-02  -.6969661E-02  -.6850950E-02  -.6732219E-02
  -.6617203E-02  -.6514558E-02  -.6425534E-02  -.6367235E-02  -.6384906E-02
  -.6425912E-02  -.6394061E-02  -.6325783E-02  -.6262573E-02  -.6199532E-02
  -.6107437E-02  -.5950433E-02  -.5771037E-02  -.5640781E-02  -.5558910E-02
  -.5445686E-02  -.5258684E-02  -.4989194E-02  -.4662773E-02  -.4342348E-02
  -.4070060E-02  -.3852735E-02  -.3680446E-02  -.3522174E-02  -.3343646E-02
  -.3126218E-02  -.2871320E-02  -.2600447E-02  -.2376041E-02  -.2222841E-02
  -.2114036E-02  -.1990875E-02  -.1809344E-02  -.1593726E-02  -.1357570E-02
  -.1079951E-02  -.7504353E-03  -.4001324E-03  -.7237401E-04   .2060095E-03
   .4359520E-03   .6574766E-03   .9001269E-03   .1192088E-02   .1518965E-02
   .1846792E-02   .2146145E-02   .2393180E-02   .2557373E-02   .2642873E-02
   .2720478E-02   .2842153E-02   .2999237E-02   .3139629E-02   .3242028E-02
   .3330273E-02   .3407421E-02   .3436386E-02   .3419260E-02   .3428413E-02
   .3509018E-02   .3629016E-02   .3752979E-02   .3861486E-02   .3945356E-02
   .3983758E-02   .3989337E-02   .4009852E-02   .4091480E-02   .4260172E-02
   .4456169E-02   .4612781E-02   .4714733E-02   .4782029E-02   .4810010E-02
   .4791969E-02   .4734801E-02   .4655349E-02   .4606809E-02   .4590621E-02
   .4581906E-02   .4562272E-02   .4528140E-02   .4488120E-02   .4475133E-02
   .4523211E-02   .4618980E-02   .4737774E-02   .4853912E-02   .4965737E-02
   .5066591E-02   .5142943E-02   .5216898E-02   .5323378E-02   .5445921E-02
   .5553880E-02   .5657115E-02   .5795255E-02   .5967984E-02   .6156653E-02
   .6346009E-02   .6527728E-02   .6720976E-02   .6961735E-02   .7257770E-02
   .7550521E-02   .7804047E-02   .8032648E-02   .8253656E-02   .8451362E-02
   .8583124E-02   .8638837E-02   .8666360E-02   .8720220E-02   .8762412E-02
   .8747085E-02   .8650258E-02   .8473683E-02   .8245264E-02   .7971181E-02
   .7674970E-02   .7369603E-02   .7054789E-02   .6718204E-02   .6393684E-02
   .6117271E-02   .5853098E-02   .5550906E-02   .5244151E-02   .5000147E-02
   .4843298E-02   .4765819E-02   .4725980E-02   .4678013E-02   .4603157E-02
   .4510480E-02   .4444627E-02   .4418107E-02   .4402678E-02   .4370603E-02
   .4328600E-02   .4286634E-02   .4191008E-02   .4013109E-02   .3807073E-02
   .3620564E-02   .3459631E-02   .3337426E-02   .3235723E-02   .3131565E-02
   .3019280E-02   .2889276E-02   .2732223E-02   .2609855E-02   .2573299E-02
   .2574652E-02   .2553088E-02   .2508402E-02   .2422213E-02   .2299301E-02
   .2184590E-02   .2091302E-02   .2010732E-02   .1941584E-02   .1890818E-02
   .1832568E-02   .1739071E-02   .1622449E-02   .1499126E-02   .1400074E-02
   .1351548E-02   .1371561E-02   .1457631E-02   .1592300E-02   .1707142E-02
   .1774463E-02   .1838939E-02   .1920527E-02   .2004488E-02   .2085249E-02
   .2166931E-02   .2242492E-02   .2273550E-02   .2263812E-02   .2208847E-02
   .2095402E-02   .1953036E-02   .1839469E-02   .1808737E-02   .1854370E-02
   .1918500E-02   .1982566E-02   .2051083E-02   .2068362E-02   .2024592E-02
   .1941773E-02   .1824146E-02   .1723593E-02   .1714139E-02   .1775160E-02
   .1829795E-02   .1840578E-02   .1788505E-02   .1694446E-02   .1592293E-02
   .1541909E-02   .1561784E-02   .1599928E-02   .1615610E-02   .1628759E-02
   .1679510E-02   .1757463E-02   .1849368E-02   .1929420E-02   .1985108E-02
   .2044117E-02   .2119682E-02   .2194885E-02   .2252690E-02   .2277167E-02
   .2261963E-02   .2240759E-02   .2245310E-02   .2272961E-02   .2288540E-02
   .2302580E-02   .2375875E-02   .2478889E-02   .2559391E-02   .2619088E-02
   .2684443E-02   .2744397E-02   .2764735E-02   .2731290E-02   .2656988E-02
   .2556147E-02   .2431917E-02   .2282212E-02   .2119261E-02   .1955758E-02
   .1798268E-02   .1647022E-02   .1507602E-02   .1366426E-02   .1243990E-02
   .1172167E-02   .1149045E-02   .1151693E-02   .1148650E-02   .1107791E-02
   .1043030E-02   .9720428E-03   .8689378E-03   .7637995E-03   .6833662E-03
   .5998052E-03   .4915521E-03   .3813080E-03   .3025889E-03   .2692111E-03
   .2654958E-03   .2515418E-03   .2004943E-03   .1039871E-03  -.3300692E-04
  -.1674163E-03  -.2619452E-03  -.3300420E-03  -.3870284E-03  -.4616199E-03
  -.6014660E-03  -.8113476E-03  -.1063584E-02  -.1313670E-02  -.1534147E-02
  -.1711061E-02  -.1843042E-02  -.1955441E-02  -.2079386E-02  -.2208504E-02
  -.2336731E-02  -.2462956E-02  -.2565745E-02  -.2633694E-02  -.2669273E-02
  -.2651264E-02  -.2572667E-02  -.2463558E-02  -.2369098E-02  -.2269604E-02
  -.2117835E-02  -.1950318E-02  -.1798246E-02  -.1657441E-02  -.1487276E-02
  -.1287199E-02  -.1084970E-02  -.8672367E-03  -.6360806E-03  -.4170334E-03
  -.2041918E-03   .4928468E-04   .3717661E-03   .6826089E-03   .9049081E-03
   .1077237E-02   .1279217E-02   .1539688E-02   .1801677E-02   .1999942E-02
   .2161211E-02   .2352826E-02   .2596531E-02   .2869300E-02   .3127604E-02
   .3363407E-02   .3595515E-02   .3869017E-02   .4176554E-02   .4463677E-02
   .4724241E-02   .4975913E-02   .5182097E-02   .5316595E-02   .5378270E-02
   .5387931E-02   .5401862E-02   .5438438E-02   .5475274E-02   .5465590E-02
   .5359510E-02   .5148016E-02   .4880341E-02   .4623325E-02   .4400694E-02
   .4212017E-02   .4037865E-02   .3834619E-02   .3576989E-02   .3309815E-02
   .3103409E-02   .2973554E-02   .2883752E-02   .2789255E-02   .2730632E-02
   .2753328E-02   .2812751E-02   .2849765E-02   .2878476E-02   .2941715E-02
   .3073160E-02   .3237523E-02   .3363358E-02   .3472712E-02   .3582621E-02
   .3685199E-02   .3796116E-02   .3902194E-02   .3956450E-02   .3939467E-02
   .3898481E-02   .3868933E-02   .3843235E-02   .3787990E-02   .3697865E-02
   .3607351E-02   .3545980E-02   .3491264E-02   .3412655E-02   .3307006E-02
   .3200059E-02   .3108781E-02   .3002774E-02   .2863595E-02   .2705605E-02
   .2521472E-02   .2299192E-02   .2058064E-02   .1801602E-02   .1522927E-02
   .1256098E-02   .1041851E-02   .8869712E-03   .7749322E-03   .6950537E-03
   .6161300E-03   .5322117E-03   .4485830E-03   .3788826E-03   .3652734E-03
   .3862194E-03   .3878821E-03   .3843185E-03   .3931150E-03   .4053606E-03
   .3913279E-03   .3598218E-03   .3321958E-03   .3146252E-03   .3010005E-03
   .2586449E-03   .1841680E-03   .1179498E-03   .7617801E-04   .4319417E-04
   .3953132E-04   .1076276E-03   .2050224E-03   .2460867E-03   .2331493E-03
   .2188980E-03   .2236796E-03   .2447070E-03   .3117718E-03   .4286711E-03
   .5407069E-03   .6303358E-03   .6985422E-03   .7475639E-03   .7974299E-03
   .8598203E-03   .8911824E-03   .8883245E-03   .9184352E-03   .1018280E-02
   .1155468E-02   .1269346E-02   .1332523E-02   .1352281E-02   .1341143E-02
   .1297579E-02   .1251855E-02   .1224263E-02   .1213506E-02   .1221462E-02
   .1219200E-02   .1156158E-02   .1023255E-02   .8882307E-03   .7952521E-03
   .7299083E-03   .6761782E-03   .6523020E-03   .6678040E-03   .7038986E-03
   .7082563E-03   .6291406E-03   .4906146E-03   .3382181E-03   .1947887E-03
   .7680124E-04   .1024134E-04  -.5167488E-04  -.1964090E-03  -.4366902E-03
  -.7171557E-03  -.9922830E-03  -.1237029E-02  -.1456920E-02  -.1679737E-02
  -.1910250E-02  -.2122183E-02  -.2321465E-02  -.2523107E-02  -.2747349E-02
  -.2962974E-02  -.3143451E-02  -.3293167E-02  -.3418473E-02  -.3531355E-02
  -.3638070E-02  -.3732032E-02  -.3818763E-02  -.3912729E-02  -.4006322E-02
  -.4094075E-02  -.4166670E-02  -.4211757E-02  -.4251867E-02  -.4314022E-02
  -.4392880E-02  -.4442088E-02  -.4444694E-02  -.4415879E-02  -.4376550E-02
  -.4325130E-02  -.4224637E-02  -.4084776E-02  -.3985326E-02  -.3951675E-02
  -.3932740E-02  -.3900228E-02  -.3868667E-02  -.3856913E-02  -.3880558E-02
  -.3932947E-02  -.3946849E-02  -.3923303E-02  -.3915907E-02  -.3939682E-02
  -.3959036E-02  -.3949163E-02  -.3884841E-02  -.3775651E-02  -.3669842E-02
  -.3589930E-02  -.3502073E-02  -.3352567E-02  -.3156215E-02  -.2956233E-02
  -.2751955E-02  -.2519288E-02  -.2242639E-02  -.1946588E-02  -.1710469E-02
  -.1558448E-02  -.1437564E-02  -.1270593E-02  -.1030588E-02  -.8041958E-03
  -.6788832E-03  -.6339646E-03  -.5938075E-03  -.5520084E-03  -.5433470E-03
  -.5722547E-03  -.5947965E-03  -.5844170E-03  -.5608754E-03  -.5563268E-03
  -.6005569E-03  -.6910723E-03  -.8204078E-03  -.9824620E-03  -.1139102E-02
  -.1238921E-02  -.1293262E-02  -.1353345E-02  -.1459967E-02  -.1612716E-02
  -.1794262E-02  -.1982647E-02  -.2179212E-02  -.2352547E-02  -.2461041E-02
  -.2526496E-02  -.2590341E-02  -.2677956E-02  -.2789729E-02  -.2914892E-02
  -.3049292E-02  -.3168293E-02  -.3250749E-02  -.3306284E-02  -.3313984E-02
  -.3278353E-02  -.3245964E-02  -.3228173E-02  -.3240452E-02  -.3257428E-02
  -.3256667E-02  -.3249862E-02  -.3241235E-02  -.3215100E-02  -.3154663E-02
  -.3062996E-02  -.2981131E-02  -.2939139E-02  -.2899883E-02  -.2829391E-02
  -.2741176E-02  -.2654429E-02  -.2547624E-02  -.2408463E-02  -.2256285E-02
  -.2093601E-02  -.1911440E-02  -.1752258E-02  -.1629927E-02  -.1513212E-02
  -.1395993E-02  -.1320044E-02  -.1278078E-02  -.1241584E-02  -.1253194E-02
  -.1340890E-02  -.1479859E-02  -.1614673E-02  -.1715769E-02  -.1799160E-02
  -.1925295E-02  -.2121067E-02  -.2317809E-02  -.2467176E-02  -.2575752E-02
  -.2644488E-02  -.2679092E-02  -.2691346E-02  -.2686560E-02  -.2642294E-02
  -.2500155E-02  -.2268904E-02  -.2030608E-02  -.1847212E-02  -.1709153E-02
  -.1596968E-02  -.1511265E-02  -.1440215E-02  -.1341235E-02  -.1211836E-02
  -.1125509E-02  -.1123503E-02  -.1178829E-02  -.1243401E-02  -.1287317E-02
  -.1327671E-02  -.1371282E-02  -.1381744E-02  -.1307268E-02  -.1204410E-02
  -.1178323E-02  -.1242609E-02  -.1339737E-02  -.1426519E-02  -.1490759E-02
  -.1560781E-02  -.1633574E-02  -.1674513E-02  -.1696187E-02  -.1741889E-02
  -.1809306E-02  -.1893921E-02  -.2023984E-02  -.2172130E-02  -.2281966E-02
  -.2357830E-02  -.2435801E-02  -.2510491E-02  -.2585099E-02  -.2685159E-02
  -.2787885E-02  -.2865428E-02  -.2913674E-02  -.2956809E-02  -.3002214E-02
  -.3047355E-02  -.3115759E-02  -.3244874E-02  -.3455337E-02  -.3704599E-02
  -.3941801E-02  -.4166036E-02  -.4403337E-02  -.4648174E-02  -.4886145E-02
  -.5093282E-02  -.5280880E-02  -.5498053E-02  -.5756636E-02  -.6026047E-02
  -.6251354E-02  -.6428860E-02  -.6589858E-02  -.6740560E-02  -.6881665E-02
  -.7002942E-02  -.7080999E-02  -.7139171E-02  -.7187948E-02  -.7213000E-02
  -.7233894E-02  -.7265587E-02  -.7318937E-02  -.7407767E-02  -.7527070E-02
  -.7627915E-02  -.7689782E-02  -.7733163E-02  -.7778989E-02  -.7842253E-02
  -.7919493E-02  -.8024997E-02  -.8184219E-02  -.8380816E-02  -.8553055E-02
  -.8607969E-02  -.8525597E-02  -.8367408E-02  -.8196099E-02  -.8067562E-02
  -.8008739E-02  -.8029061E-02  -.8087672E-02  -.8163529E-02  -.8211752E-02
  -.8168651E-02  -.8042833E-02  -.7887345E-02  -.7782469E-02  -.7762457E-02
  -.7790854E-02  -.7797768E-02  -.7765453E-02  -.7716055E-02  -.7593092E-02
  -.7373301E-02  -.7094386E-02  -.6810570E-02  -.6575276E-02  -.6370236E-02
  -.6129961E-02  -.5846421E-02  -.5569901E-02  -.5311495E-02  -.5047610E-02
  -.4759112E-02  -.4433932E-02  -.4055478E-02  -.3672845E-02  -.3361054E-02
  -.3140879E-02  -.2983668E-02  -.2838561E-02  -.2685831E-02  -.2531333E-02
  -.2352887E-02  -.2141193E-02  -.1970391E-02  -.1914632E-02  -.1965662E-02
  -.2031777E-02  -.2047979E-02  -.2002956E-02  -.1929109E-02  -.1845046E-02
  -.1750685E-02  -.1684155E-02  -.1653642E-02  -.1633093E-02  -.1628560E-02
  -.1617206E-02  -.1557561E-02  -.1436931E-02  -.1288462E-02  -.1119466E-02
  -.9145586E-03  -.7046279E-03  -.5269912E-03  -.3998905E-03  -.2998099E-03
  -.1777686E-03  -.2697405E-04   .1259895E-03   .2666948E-03   .3724195E-03
   .4436800E-03   .4954049E-03   .5582409E-03   .6573924E-03   .7967160E-03
   .9870345E-03   .1209103E-02   .1460215E-02   .1739431E-02   .2021626E-02
   .2252027E-02   .2407550E-02   .2551917E-02   .2747260E-02   .2983073E-02
   .3228131E-02   .3430937E-02   .3535475E-02   .3560296E-02   .3574529E-02
   .3619772E-02   .3675869E-02   .3679348E-02   .3626282E-02   .3567517E-02
   .3506221E-02   .3419173E-02   .3333450E-02   .3291991E-02   .3289651E-02
   .3274914E-02   .3207497E-02   .3130661E-02   .3117213E-02   .3132098E-02
   .3100000E-02   .3017147E-02   .2918534E-02   .2815275E-02   .2743427E-02
   .2718580E-02   .2679171E-02   .2600448E-02   .2499094E-02   .2385255E-02
   .2265480E-02   .2163889E-02   .2099109E-02   .2030860E-02   .1942184E-02
   .1883775E-02   .1865989E-02   .1850941E-02   .1837819E-02   .1836725E-02
   .1835655E-02   .1850722E-02   .1892547E-02   .1964329E-02   .2067904E-02
   .2191317E-02   .2310061E-02   .2388181E-02   .2418656E-02   .2398771E-02
   .2302967E-02   .2131297E-02   .1924307E-02   .1731149E-02   .1582175E-02
   .1451472E-02   .1336633E-02   .1219874E-02   .1004125E-02   .6980050E-03
   .4212130E-03   .2503181E-03   .1828453E-03   .2111503E-03   .3318024E-03
   .4948758E-03   .6259320E-03   .7047605E-03   .7915917E-03   .9437317E-03
   .1167039E-02   .1442451E-02   .1740945E-02   .2030521E-02   .2286008E-02
   .2440566E-02   .2488133E-02   .2529417E-02   .2614454E-02   .2696188E-02
   .2736854E-02   .2746643E-02   .2765627E-02   .2825347E-02   .2893966E-02
   .2934530E-02   .2983815E-02   .3068159E-02   .3158187E-02   .3228731E-02
   .3298006E-02   .3397430E-02   .3537205E-02   .3690530E-02   .3828014E-02
   .3958467E-02   .4087474E-02   .4199450E-02   .4306380E-02   .4433516E-02
   .4601038E-02   .4802181E-02   .5015600E-02   .5219214E-02   .5400532E-02
   .5570558E-02   .5761271E-02   .6004302E-02   .6283724E-02   .6529046E-02
   .6712702E-02   .6856503E-02   .6991049E-02   .7120868E-02   .7218329E-02
   .7273803E-02   .7292071E-02   .7251302E-02   .7167729E-02   .7036677E-02
   .6836874E-02   .6603906E-02   .6366290E-02   .6144448E-02   .5946374E-02
   .5799114E-02   .5706533E-02   .5654311E-02   .5612893E-02   .5501019E-02
   .5308466E-02   .5108012E-02   .4942736E-02   .4824549E-02   .4770024E-02
   .4789722E-02   .4822087E-02   .4776210E-02   .4620179E-02   .4391090E-02
   .4178536E-02   .4060374E-02   .4036888E-02   .4091306E-02   .4183679E-02
   .4243475E-02   .4219395E-02   .4100217E-02   .3934707E-02   .3800149E-02
   .3748972E-02   .3782295E-02   .3843759E-02   .3922149E-02   .4002854E-02
   .4043860E-02   .4026121E-02   .3942381E-02   .3833967E-02   .3732015E-02
   .3641343E-02   .3587862E-02   .3526323E-02   .3391851E-02   .3168608E-02
   .2905920E-02   .2651425E-02   .2403715E-02   .2171943E-02   .1949571E-02
   .1750541E-02   .1610566E-02   .1517648E-02   .1420056E-02   .1284567E-02
   .1144404E-02   .1039704E-02   .9427204E-03   .8148929E-03   .6606036E-03
   .5418359E-03   .5111055E-03   .5675327E-03   .6416558E-03   .6617641E-03
   .6334170E-03   .5612981E-03   .4432238E-03   .3059670E-03   .2078814E-03
   .2165105E-03   .3161424E-03   .4617474E-03   .6128708E-03   .7640570E-03
   .9015329E-03   .9995346E-03   .1081439E-02   .1191312E-02   .1328101E-02
   .1477976E-02   .1599648E-02   .1657590E-02   .1647407E-02   .1584395E-02
   .1489471E-02   .1398140E-02   .1357812E-02   .1353010E-02   .1334113E-02
   .1287908E-02   .1228762E-02   .1199295E-02   .1190753E-02   .1163727E-02
   .1105147E-02   .1041832E-02   .9538920E-03   .8141515E-03   .6256937E-03
   .3822419E-03   .1285894E-03  -.9717237E-04  -.3119718E-03  -.5378421E-03
  -.7729936E-03  -.1015640E-02  -.1192195E-02  -.1256172E-02  -.1258848E-02
  -.1233227E-02  -.1170938E-02  -.1122211E-02  -.1103547E-02  -.1128342E-02
  -.1199034E-02  -.1263962E-02  -.1283734E-02  -.1271167E-02  -.1282044E-02
  -.1368476E-02  -.1516371E-02  -.1671417E-02  -.1814723E-02  -.1945442E-02
  -.2048619E-02  -.2115709E-02  -.2165643E-02  -.2231734E-02  -.2307612E-02
  -.2345111E-02  -.2335759E-02  -.2285292E-02  -.2203200E-02  -.2087264E-02
  -.1911456E-02  -.1713120E-02  -.1538189E-02  -.1377228E-02  -.1204763E-02
  -.1015033E-02  -.8282280E-03  -.6785463E-03  -.5450371E-03  -.3549870E-03
  -.9275121E-04   .1859780E-03   .4217554E-03   .5993709E-03   .7191668E-03
   .8022474E-03   .9099745E-03   .1041758E-02   .1132972E-02   .1164588E-02
   .1173138E-02   .1205343E-02   .1239459E-02   .1219544E-02   .1131186E-02
   .1022282E-02   .9607590E-03   .9760090E-03   .1050312E-02   .1174359E-02
   .1356752E-02   .1564964E-02   .1733322E-02   .1847623E-02   .1929264E-02
   .2033116E-02   .2190949E-02   .2408266E-02   .2661842E-02   .2904834E-02
   .3144929E-02   .3421047E-02   .3705939E-02   .3951151E-02   .4142684E-02
   .4294233E-02   .4443554E-02   .4585112E-02   .4705872E-02   .4836516E-02
   .4969352E-02   .5067050E-02   .5127538E-02   .5139073E-02   .5072937E-02
   .4957606E-02   .4901356E-02   .4920430E-02   .4930193E-02   .4887952E-02
   .4796328E-02   .4679384E-02   .4576649E-02   .4479762E-02   .4379304E-02
   .4291286E-02   .4185382E-02   .4043062E-02   .3876962E-02   .3750132E-02
   .3669534E-02   .3556966E-02   .3411735E-02   .3324472E-02   .3327286E-02
   .3366329E-02   .3400478E-02   .3433907E-02   .3480009E-02   .3536741E-02
   .3600823E-02   .3698808E-02   .3839560E-02   .3964005E-02   .4048280E-02
   .4136400E-02   .4254933E-02   .4417903E-02   .4597925E-02   .4782521E-02
   .4966756E-02   .5151187E-02   .5338549E-02   .5512325E-02   .5645408E-02
   .5751294E-02   .5868080E-02   .6027199E-02   .6213691E-02   .6359623E-02
   .6430093E-02   .6443952E-02   .6406428E-02   .6318235E-02   .6218321E-02
   .6198632E-02   .6259702E-02   .6330656E-02   .6351042E-02   .6309398E-02
   .6224080E-02   .6114419E-02   .5988032E-02   .5877876E-02   .5835257E-02
   .5882350E-02   .5957756E-02   .6008746E-02   .6021174E-02   .5973992E-02
   .5871050E-02   .5733201E-02   .5616298E-02   .5567804E-02   .5591888E-02
   .5670239E-02   .5770679E-02   .5842537E-02   .5876576E-02   .5919401E-02
   .6007111E-02   .6122100E-02   .6233421E-02   .6365599E-02   .6517544E-02
   .6650678E-02   .6718028E-02   .6731003E-02   .6710065E-02   .6647732E-02
   .6583526E-02   .6557360E-02   .6555361E-02   .6531386E-02   .6457204E-02
   .6324888E-02   .6151723E-02   .5956227E-02   .5779741E-02   .5640692E-02
   .5516115E-02   .5423514E-02   .5377795E-02   .5344829E-02   .5249280E-02
   .5070562E-02   .4841397E-02   .4590282E-02   .4336866E-02   .4102572E-02
   .3893908E-02   .3691453E-02   .3485816E-02   .3247251E-02   .2984433E-02
   .2753854E-02   .2600440E-02   .2510845E-02   .2458527E-02   .2441396E-02
   .2480326E-02   .2580238E-02   .2702771E-02   .2787671E-02   .2811532E-02
   .2777456E-02   .2739939E-02   .2764933E-02   .2830104E-02   .2868837E-02
   .2860457E-02   .2826310E-02   .2763490E-02   .2665116E-02   .2563080E-02
   .2451045E-02   .2282891E-02   .2065956E-02   .1871969E-02   .1770849E-02
   .1760427E-02   .1786072E-02   .1809145E-02   .1805950E-02   .1783154E-02
   .1781658E-02   .1815581E-02   .1847980E-02   .1869929E-02   .1873599E-02
   .1845287E-02   .1824176E-02   .1864446E-02   .1955166E-02   .2043580E-02
   .2095636E-02   .2100026E-02   .2083588E-02   .2060108E-02   .2023585E-02
   .2001933E-02   .2026765E-02   .2086067E-02   .2132633E-02   .2143082E-02
   .2143545E-02   .2157015E-02   .2189356E-02   .2237317E-02   .2303696E-02
   .2416856E-02   .2557586E-02   .2682878E-02   .2782905E-02   .2861264E-02
   .2917907E-02   .2951666E-02   .2997880E-02   .3094687E-02   .3197583E-02
   .3240162E-02   .3211014E-02   .3115391E-02   .3005267E-02   .2977559E-02
   .3025920E-02   .3074273E-02   .3067225E-02   .3002301E-02   .2915583E-02
   .2840352E-02   .2795850E-02   .2788715E-02   .2825205E-02   .2884027E-02
   .2949007E-02   .3023102E-02   .3122432E-02   .3237783E-02   .3368514E-02
   .3530783E-02   .3696713E-02   .3849969E-02   .3974141E-02   .4059349E-02
   .4137201E-02   .4213378E-02   .4283448E-02   .4343436E-02   .4386606E-02
   .4441481E-02   .4503760E-02   .4530143E-02   .4498328E-02   .4448069E-02
   .4447668E-02   .4503285E-02   .4602565E-02   .4742158E-02   .4888290E-02
   .5008295E-02   .5138242E-02   .5280227E-02   .5383684E-02   .5432455E-02
   .5457743E-02   .5484497E-02   .5501581E-02   .5535073E-02   .5603899E-02
   .5676046E-02   .5716720E-02   .5738842E-02   .5744569E-02   .5725801E-02
   .5692161E-02   .5641379E-02   .5552969E-02   .5426160E-02   .5295409E-02
   .5174337E-02   .5025737E-02   .4807880E-02   .4568425E-02   .4399337E-02
   .4312790E-02   .4231334E-02   .4116932E-02   .4006437E-02   .3940969E-02
   .3903159E-02   .3827169E-02   .3669219E-02   .3480732E-02   .3332355E-02
   .3239881E-02   .3173617E-02   .3088300E-02   .2961859E-02   .2803175E-02
   .2650141E-02   .2514853E-02   .2395505E-02   .2287313E-02   .2191533E-02
   .2108906E-02   .2023258E-02   .1920357E-02   .1778222E-02   .1627246E-02
   .1532265E-02   .1498198E-02   .1484876E-02   .1456677E-02   .1413986E-02
   .1369262E-02   .1331836E-02   .1293882E-02   .1240030E-02   .1177502E-02
   .1149240E-02   .1177458E-02   .1231335E-02   .1292330E-02   .1362006E-02
   .1449211E-02   .1553505E-02   .1657168E-02   .1770373E-02   .1921846E-02
   .2119491E-02   .2344910E-02   .2586580E-02   .2783522E-02   .2916533E-02
   .3054698E-02   .3233984E-02   .3412563E-02   .3547590E-02   .3631781E-02
   .3646360E-02   .3608732E-02   .3545012E-02   .3483743E-02   .3439028E-02
   .3369568E-02   .3253753E-02   .3102566E-02   .2938180E-02   .2776238E-02
   .2636799E-02   .2525485E-02   .2434687E-02   .2358839E-02   .2286354E-02
   .2199868E-02   .2091803E-02   .1947223E-02   .1789521E-02   .1650253E-02
   .1514471E-02   .1368738E-02   .1226456E-02   .1118833E-02   .1060065E-02
   .1015837E-02   .9639170E-03   .9068047E-03   .8531380E-03   .8299484E-03
   .8445399E-03   .8732095E-03   .8639068E-03   .8165931E-03   .7970355E-03
   .8572635E-03   .9711613E-03   .1048848E-02   .1063771E-02   .1077718E-02
   .1156763E-02   .1279832E-02   .1383454E-02   .1457123E-02   .1523885E-02
   .1604153E-02   .1689487E-02   .1755567E-02   .1787652E-02   .1804928E-02
   .1838183E-02   .1882099E-02   .1882628E-02   .1831791E-02   .1780908E-02
   .1758892E-02   .1747416E-02   .1739942E-02   .1753159E-02   .1803610E-02
   .1826823E-02   .1779970E-02   .1689415E-02   .1574914E-02   .1483488E-02
   .1480097E-02   .1555920E-02   .1616745E-02   .1580703E-02   .1512205E-02
   .1514523E-02   .1589872E-02   .1676775E-02   .1743897E-02   .1823273E-02
   .1922743E-02   .2006677E-02   .2034436E-02   .1986837E-02   .1904248E-02
   .1836535E-02   .1806232E-02   .1816736E-02   .1846119E-02   .1875683E-02
   .1890113E-02   .1864119E-02   .1786265E-02   .1700419E-02   .1653499E-02
   .1633759E-02   .1607803E-02   .1546170E-02   .1453794E-02   .1370082E-02
   .1335760E-02   .1330373E-02   .1300899E-02   .1232451E-02   .1148761E-02
   .1070030E-02   .9829261E-03   .8699675E-03   .7323283E-03   .5802076E-03
   .4381309E-03   .3126533E-03   .2147421E-03   .1331685E-03   .4619224E-04
  -.2094327E-04  -.6663330E-04  -.9906378E-04  -.1027022E-03  -.7474568E-04
  -.1882869E-04   .3672538E-04   .6283857E-04   .7322241E-04   .8411764E-04
   .9969661E-04   .1335012E-03   .1631464E-03   .1574679E-03   .1176432E-03
   .5891002E-04  -.3438427E-04  -.1335494E-03  -.2100315E-03  -.2783681E-03
  -.3626852E-03  -.4517660E-03  -.4932400E-03  -.4828886E-03  -.4669215E-03
  -.4530997E-03  -.4401535E-03  -.4342741E-03  -.4580946E-03  -.5105176E-03
  -.5687918E-03  -.6297899E-03  -.7083993E-03  -.7967126E-03  -.8599984E-03
  -.8963168E-03  -.9396304E-03  -.1010131E-02  -.1084816E-02  -.1179520E-02
  -.1273027E-02  -.1366377E-02  -.1474890E-02  -.1591990E-02  -.1708308E-02
  -.1806742E-02  -.1870629E-02  -.1897614E-02  -.1952863E-02  -.2066873E-02
  -.2198912E-02  -.2312598E-02  -.2433131E-02  -.2560732E-02  -.2641335E-02
  -.2656690E-02  -.2655237E-02  -.2691732E-02  -.2771626E-02  -.2824264E-02
  -.2796566E-02  -.2767049E-02  -.2797295E-02  -.2848380E-02  -.2872178E-02
  -.2882281E-02  -.2914878E-02  -.2986666E-02  -.3114539E-02  -.3249904E-02
  -.3308586E-02  -.3325753E-02  -.3339673E-02  -.3347365E-02  -.3347331E-02
  -.3381528E-02  -.3470730E-02  -.3584654E-02  -.3685676E-02  -.3772477E-02
  -.3869240E-02  -.3988656E-02  -.4125300E-02  -.4225387E-02  -.4233308E-02
  -.4168095E-02  -.4115710E-02  -.4113648E-02  -.4126635E-02  -.4138946E-02
  -.4125426E-02  -.4058396E-02  -.3931796E-02  -.3769715E-02  -.3601144E-02
  -.3448608E-02  -.3340519E-02  -.3277516E-02  -.3201798E-02  -.3111805E-02
  -.3028922E-02  -.2939956E-02  -.2853287E-02  -.2812771E-02  -.2829634E-02
  -.2889378E-02  -.3007949E-02  -.3181512E-02  -.3406307E-02  -.3675964E-02
  -.3934853E-02  -.4132841E-02  -.4305390E-02  -.4487580E-02  -.4687764E-02
  -.4913304E-02  -.5165988E-02  -.5411703E-02  -.5618048E-02  -.5802580E-02
  -.5989036E-02  -.6167261E-02  -.6316281E-02  -.6486046E-02  -.6707109E-02
  -.6946325E-02  -.7155874E-02  -.7307737E-02  -.7410746E-02  -.7485463E-02
  -.7560177E-02  -.7650628E-02  -.7742231E-02  -.7827230E-02  -.7921816E-02
  -.8037982E-02  -.8128525E-02  -.8131332E-02  -.8048135E-02  -.7920522E-02
  -.7778155E-02  -.7625855E-02  -.7474395E-02  -.7317756E-02  -.7183219E-02
  -.7087627E-02  -.6972023E-02  -.6803216E-02  -.6608256E-02  -.6427778E-02
  -.6266112E-02  -.6128341E-02  -.6064952E-02  -.6068175E-02  -.6078049E-02
  -.6065834E-02  -.6034856E-02  -.5975583E-02  -.5884588E-02  -.5774111E-02
  -.5667898E-02  -.5587198E-02  -.5545967E-02  -.5554461E-02  -.5598591E-02
  -.5644284E-02  -.5691180E-02  -.5750033E-02  -.5820203E-02  -.5914181E-02
  -.6021323E-02  -.6123376E-02  -.6225951E-02  -.6349658E-02  -.6484972E-02
  -.6595105E-02  -.6670175E-02  -.6716120E-02  -.6764483E-02  -.6839311E-02
  -.6918200E-02  -.6990693E-02  -.7042382E-02  -.7093927E-02  -.7172498E-02
  -.7290192E-02  -.7439534E-02  -.7568986E-02  -.7652635E-02  -.7741772E-02
  -.7854039E-02  -.7947336E-02  -.7995378E-02  -.8005199E-02  -.8004067E-02
  -.7987539E-02  -.7942461E-02  -.7904908E-02  -.7912703E-02  -.7947000E-02
  -.7980114E-02  -.8011066E-02  -.8052313E-02  -.8120590E-02  -.8211177E-02
  -.8284880E-02  -.8334947E-02  -.8385455E-02  -.8450716E-02  -.8511242E-02
  -.8558397E-02  -.8594459E-02  -.8633192E-02  -.8670998E-02  -.8703712E-02
  -.8752221E-02  -.8817729E-02  -.8879084E-02  -.8920198E-02  -.8939618E-02
  -.8970641E-02  -.9045761E-02  -.9152726E-02  -.9242539E-02  -.9277153E-02
  -.9278077E-02  -.9293523E-02  -.9366456E-02  -.9514832E-02  -.9654168E-02
  -.9728908E-02  -.9794750E-02  -.9895156E-02  -.1000527E-01  -.1011751E-01
  -.1026254E-01  -.1042167E-01  -.1054529E-01  -.1065969E-01  -.1081947E-01
  -.1100213E-01  -.1116919E-01  -.1131680E-01  -.1140853E-01  -.1144995E-01
  -.1150596E-01  -.1156966E-01  -.1157627E-01  -.1152356E-01  -.1147801E-01
  -.1146545E-01  -.1145104E-01  -.1141851E-01  -.1135427E-01  -.1126825E-01
  -.1122333E-01  -.1124222E-01  -.1129412E-01  -.1132658E-01  -.1136462E-01
  -.1148088E-01  -.1166735E-01  -.1184255E-01  -.1195635E-01  -.1203363E-01
  -.1212835E-01  -.1224961E-01  -.1236715E-01  -.1246660E-01  -.1257639E-01
  -.1272171E-01  -.1284199E-01  -.1287263E-01  -.1284636E-01  -.1283169E-01
  -.1284219E-01  -.1286091E-01  -.1288213E-01  -.1290453E-01  -.1290934E-01
  -.1286765E-01  -.1278718E-01  -.1271220E-01  -.1263362E-01  -.1254451E-01
  -.1247096E-01  -.1241562E-01  -.1235870E-01  -.1225535E-01  -.1210102E-01
  -.1197334E-01  -.1194183E-01  -.1194557E-01  -.1189289E-01  -.1178857E-01
  -.1170797E-01  -.1166501E-01  -.1160005E-01  -.1148673E-01  -.1134725E-01
  -.1121608E-01  -.1109468E-01  -.1097066E-01  -.1084970E-01  -.1068901E-01
  -.1046370E-01  -.1021912E-01  -.1001472E-01  -.9866590E-02  -.9766433E-02
  -.9717334E-02  -.9697531E-02  -.9691609E-02  -.9709926E-02  -.9767900E-02
  -.9858388E-02  -.9942732E-02  -.9997725E-02  -.1004337E-01  -.1010326E-01
  -.1019236E-01  -.1028407E-01  -.1032953E-01  -.1032926E-01  -.1031107E-01
  -.1029295E-01  -.1029885E-01  -.1036424E-01  -.1048525E-01  -.1063201E-01
  -.1078102E-01  -.1091510E-01  -.1103765E-01  -.1115618E-01  -.1128580E-01
  -.1144458E-01  -.1160282E-01  -.1170097E-01  -.1172142E-01  -.1171475E-01
  -.1169954E-01  -.1164970E-01  -.1155214E-01  -.1140740E-01  -.1125284E-01
  -.1112433E-01  -.1099663E-01  -.1084213E-01  -.1066914E-01  -.1049202E-01
  -.1033864E-01  -.1022490E-01  -.1012583E-01  -.1001778E-01  -.9895728E-02
  -.9775318E-02  -.9678187E-02  -.9609922E-02  -.9542086E-02  -.9464721E-02
  -.9390648E-02  -.9328495E-02  -.9247462E-02  -.9114824E-02  -.8962524E-02
  -.8810110E-02  -.8672875E-02  -.8548341E-02  -.8446687E-02  -.8390495E-02
  -.8375318E-02  -.8385139E-02  -.8391027E-02  -.8354559E-02  -.8261464E-02
  -.8154843E-02  -.8083898E-02  -.8072725E-02  -.8054851E-02  -.7935008E-02
  -.7741891E-02  -.7563769E-02  -.7424557E-02  -.7283940E-02  -.7117110E-02
  -.6932802E-02  -.6751975E-02  -.6583661E-02  -.6435117E-02  -.6299564E-02
  -.6189590E-02  -.6114457E-02  -.6060288E-02  -.6028608E-02  -.6003068E-02
  -.5942324E-02  -.5798807E-02  -.5573025E-02  -.5299862E-02  -.5032490E-02
  -.4815621E-02  -.4660847E-02  -.4512683E-02  -.4337100E-02  -.4194981E-02
  -.4096973E-02  -.3994742E-02  -.3879739E-02  -.3789353E-02  -.3778052E-02
  -.3842744E-02  -.3929437E-02  -.4008175E-02  -.4077913E-02  -.4154852E-02
  -.4245425E-02  -.4308677E-02  -.4308937E-02  -.4292403E-02  -.4304229E-02
  -.4353750E-02  -.4463151E-02  -.4616394E-02  -.4762029E-02  -.4867792E-02
  -.4919663E-02  -.4942401E-02  -.4970106E-02  -.4967677E-02  -.4936964E-02
  -.4905452E-02  -.4873151E-02  -.4808684E-02  -.4695044E-02  -.4557387E-02
  -.4392881E-02  -.4200467E-02  -.4023284E-02  -.3875177E-02  -.3736734E-02
  -.3593701E-02  -.3431318E-02  -.3255228E-02  -.3115405E-02  -.3024581E-02
  -.2960495E-02  -.2921572E-02  -.2888181E-02  -.2857085E-02  -.2821765E-02
  -.2749460E-02  -.2628138E-02  -.2480926E-02  -.2344432E-02  -.2251272E-02
  -.2183844E-02  -.2114199E-02  -.2047718E-02  -.1981753E-02  -.1912882E-02
  -.1816178E-02  -.1679738E-02  -.1531182E-02  -.1423648E-02  -.1397686E-02
  -.1390805E-02  -.1340851E-02  -.1239372E-02  -.1097095E-02  -.9578181E-03
  -.8608300E-03  -.7971948E-03  -.7282087E-03  -.6622191E-03  -.6392875E-03
  -.6473310E-03  -.6762253E-03  -.7665661E-03  -.8980011E-03  -.9965769E-03
  -.1072713E-02  -.1186832E-02  -.1350820E-02  -.1558898E-02  -.1779862E-02
  -.1959732E-02  -.2085951E-02  -.2199245E-02  -.2334271E-02  -.2499426E-02
  -.2653924E-02  -.2766363E-02  -.2848427E-02  -.2903599E-02  -.2929946E-02
  -.2931013E-02  -.2960639E-02  -.3055170E-02  -.3161722E-02  -.3212981E-02
  -.3250843E-02  -.3317052E-02  -.3402322E-02  -.3466516E-02  -.3439381E-02
  -.3321027E-02  -.3174709E-02  -.3065616E-02  -.3024134E-02  -.3001331E-02
  -.2929574E-02  -.2783958E-02  -.2617753E-02  -.2471736E-02  -.2366687E-02
  -.2262960E-02  -.2122980E-02  -.1976395E-02  -.1836889E-02  -.1701754E-02
  -.1581502E-02  -.1478250E-02  -.1380476E-02  -.1261348E-02  -.1111114E-02
  -.9381421E-03  -.7624858E-03  -.6282480E-03  -.5247337E-03  -.4013590E-03
  -.2330929E-03  -.7126272E-04   .5230288E-04   .1576549E-03   .2982199E-03
   .4896502E-03   .6884049E-03   .8753776E-03   .1041477E-02   .1166003E-02
   .1267631E-02   .1406207E-02   .1572516E-02   .1687771E-02   .1770767E-02
   .1884623E-02   .2034550E-02   .2194083E-02   .2323547E-02   .2396349E-02
   .2400708E-02   .2348007E-02   .2279782E-02   .2248095E-02   .2241546E-02
   .2196842E-02   .2083534E-02   .1928824E-02   .1799540E-02   .1700705E-02
   .1593264E-02   .1461968E-02   .1310736E-02   .1152495E-02   .9811343E-03
   .8191268E-03   .7370726E-03   .7450756E-03   .7738534E-03   .7835391E-03
   .7643409E-03   .6988223E-03   .6029602E-03   .5453200E-03   .5156546E-03
   .4544222E-03   .3374551E-03   .2102425E-03   .1350708E-03   .9461656E-04
   .4834079E-04  -.3625575E-05  -.5863600E-04  -.1077014E-03  -.1472570E-03
  -.1860196E-03  -.2157273E-03  -.2239265E-03  -.2146939E-03  -.1951898E-03
  -.1459524E-03  -.6723728E-04  -.1546528E-05   .2481225E-04   .4104970E-04
   .8083215E-04   .1367513E-03   .2126229E-03   .3277344E-03   .4395089E-03
   .5020619E-03   .5575721E-03   .6491315E-03   .7633808E-03   .8442754E-03
   .8497671E-03   .8097714E-03   .7807793E-03   .7904987E-03   .8481808E-03
   .9432916E-03   .1073075E-02   .1237351E-02   .1406301E-02   .1546767E-02
   .1639543E-02   .1683642E-02   .1704917E-02   .1734350E-02   .1808494E-02
   .1921850E-02   .2046710E-02   .2172313E-02   .2246120E-02   .2206347E-02
   .2065666E-02   .1915710E-02   .1780342E-02   .1630465E-02   .1469445E-02
   .1267913E-02   .1002195E-02   .6846024E-03   .3432384E-03  -.8820741E-05
  -.3393721E-03  -.6133083E-03  -.8453279E-03  -.1083493E-02  -.1339393E-02
  -.1578038E-02  -.1782816E-02  -.1948391E-02  -.2075109E-02  -.2183954E-02
  -.2299236E-02  -.2402655E-02  -.2495611E-02  -.2612659E-02  -.2785629E-02
  -.2973123E-02  -.3111787E-02  -.3142862E-02  -.3067568E-02  -.2950750E-02
  -.2849343E-02  -.2811941E-02  -.2827774E-02  -.2864443E-02  -.2878399E-02
  -.2832870E-02  -.2734314E-02  -.2632654E-02  -.2548392E-02  -.2469656E-02
  -.2387320E-02  -.2291691E-02  -.2184670E-02  -.2048993E-02  -.1854784E-02
  -.1597593E-02  -.1281634E-02  -.9222051E-03  -.5640643E-03  -.2662201E-03
  -.6941272E-04   .7268748E-04   .2172486E-03   .3748421E-03   .5482079E-03
   .7054400E-03   .8082572E-03   .8654650E-03   .9056114E-03   .9205463E-03
   .8923516E-03   .8598457E-03   .8927162E-03   .9750495E-03   .1076941E-02
   .1190339E-02   .1281098E-02   .1331127E-02   .1356826E-02   .1401404E-02
   .1490409E-02   .1633765E-02   .1791788E-02   .1925876E-02   .2045564E-02
   .2141492E-02   .2205503E-02   .2272040E-02   .2369713E-02   .2480836E-02
   .2586704E-02   .2693323E-02   .2813365E-02   .2953271E-02   .3086317E-02
   .3196140E-02   .3294147E-02   .3394161E-02   .3526795E-02   .3697145E-02
   .3885209E-02   .4042403E-02   .4135919E-02   .4201949E-02   .4280243E-02
   .4337181E-02   .4342348E-02   .4331225E-02   .4343675E-02   .4395264E-02
   .4459139E-02   .4493444E-02   .4461403E-02   .4406022E-02   .4363583E-02
   .4333197E-02   .4315094E-02   .4307787E-02   .4302396E-02   .4280577E-02
   .4247870E-02   .4221398E-02   .4200631E-02   .4186738E-02   .4158741E-02
   .4109940E-02   .4060236E-02   .4049163E-02   .4109946E-02   .4229193E-02
   .4368567E-02   .4511814E-02   .4647910E-02   .4759899E-02   .4863403E-02
   .4963077E-02   .5052983E-02   .5168655E-02   .5323572E-02   .5496318E-02
   .5666409E-02   .5818506E-02   .5963277E-02   .6110030E-02   .6227299E-02
   .6312833E-02   .6373572E-02   .6418060E-02   .6478197E-02   .6577900E-02
   .6714081E-02   .6837018E-02   .6895879E-02   .6903602E-02   .6897877E-02
   .6896923E-02   .6913117E-02   .6952317E-02   .7005379E-02   .7066920E-02
   .7150977E-02   .7241415E-02   .7332856E-02   .7417350E-02   .7477927E-02
   .7559191E-02   .7682416E-02   .7778734E-02   .7781943E-02   .7719763E-02
   .7665498E-02   .7641841E-02   .7608884E-02   .7573760E-02   .7592936E-02
   .7668742E-02   .7754237E-02   .7839316E-02   .7964152E-02   .8128569E-02
   .8298746E-02   .8464399E-02   .8642813E-02   .8842347E-02   .9065167E-02
   .9296378E-02   .9519734E-02   .9702473E-02   .9840599E-02   .9937799E-02
   .1001315E-01   .1007814E-01   .1015868E-01   .1027328E-01   .1035113E-01
   .1033733E-01   .1029095E-01   .1027167E-01   .1029920E-01   .1034839E-01
   .1034958E-01   .1031215E-01   .1031056E-01   .1035451E-01   .1040319E-01
   .1043825E-01   .1046450E-01   .1048123E-01   .1049538E-01   .1051064E-01
   .1048591E-01   .1040795E-01   .1034344E-01   .1033269E-01   .1032375E-01
   .1032014E-01   .1032193E-01   .1031534E-01   .1030260E-01   .1029184E-01
   .1031992E-01   .1041754E-01   .1056171E-01   .1070462E-01   .1078485E-01
   .1077926E-01   .1076686E-01   .1078981E-01   .1080216E-01   .1078197E-01
   .1073861E-01   .1069179E-01   .1065458E-01   .1061140E-01   .1054277E-01
   .1046476E-01   .1042987E-01   .1043965E-01   .1046362E-01   .1045553E-01
   .1041637E-01   .1039882E-01   .1045956E-01   .1057030E-01   .1067504E-01
   .1074094E-01   .1078471E-01   .1085056E-01   .1094896E-01   .1105697E-01
   .1113455E-01   .1116659E-01   .1120890E-01   .1132523E-01   .1151273E-01
   .1169656E-01   .1180606E-01   .1186309E-01   .1193768E-01   .1203541E-01
   .1211075E-01   .1214317E-01   .1214221E-01   .1213949E-01   .1215889E-01
   .1219412E-01   .1221261E-01   .1220068E-01   .1218244E-01   .1218151E-01
   .1220155E-01   .1220650E-01   .1220914E-01   .1222849E-01   .1223434E-01
   .1220350E-01   .1218267E-01   .1223400E-01   .1235627E-01   .1247921E-01
   .1255169E-01   .1260469E-01   .1265393E-01   .1268541E-01   .1268185E-01
   .1263915E-01   .1259358E-01   .1256817E-01   .1253839E-01   .1248331E-01
   .1239684E-01   .1229230E-01   .1215874E-01   .1201219E-01   .1186885E-01
   .1173392E-01   .1161146E-01   .1151583E-01   .1144648E-01   .1137415E-01
   .1127637E-01   .1116384E-01   .1103638E-01   .1093573E-01   .1087213E-01
   .1080515E-01   .1072040E-01   .1064191E-01   .1056833E-01   .1043760E-01
   .1023028E-01   .1000980E-01   .9835170E-02   .9702416E-02   .9575071E-02
   .9440248E-02   .9327683E-02   .9231520E-02   .9106697E-02   .8960268E-02
   .8842080E-02   .8774463E-02   .8723377E-02   .8682696E-02   .8685920E-02
   .8742844E-02   .8811190E-02   .8862520E-02   .8884474E-02   .8852763E-02
   .8764972E-02   .8682588E-02   .8657067E-02   .8683602E-02   .8724564E-02
   .8724226E-02   .8664732E-02   .8581892E-02   .8494896E-02   .8398966E-02
   .8291514E-02   .8200923E-02   .8151338E-02   .8124442E-02   .8105445E-02
   .8087259E-02   .8085864E-02   .8089388E-02   .8068573E-02   .8020591E-02
   .7978028E-02   .7953574E-02   .7945771E-02   .7946008E-02   .7938907E-02
   .7916403E-02   .7876571E-02   .7848849E-02   .7863645E-02   .7908755E-02
   .7951467E-02   .7998886E-02   .8035877E-02   .8057672E-02   .8103132E-02
   .8149577E-02   .8158101E-02   .8159494E-02   .8168431E-02   .8141093E-02
   .8058371E-02   .7912935E-02   .7724462E-02   .7526167E-02   .7330020E-02
   .7129239E-02   .6916157E-02   .6723628E-02   .6561509E-02   .6388749E-02
   .6158613E-02   .5897713E-02   .5672923E-02   .5490389E-02   .5343545E-02
   .5235247E-02   .5147654E-02   .5075253E-02   .5019814E-02   .4971240E-02
   .4893931E-02   .4795935E-02   .4720266E-02   .4694310E-02   .4695039E-02
   .4698528E-02   .4703556E-02   .4714170E-02   .4708186E-02   .4662920E-02
   .4611101E-02   .4612866E-02   .4663416E-02   .4714760E-02   .4740620E-02
   .4780779E-02   .4883752E-02   .4977866E-02   .4998217E-02   .4969777E-02
   .4943963E-02   .4954597E-02   .4996718E-02   .5028160E-02   .5010318E-02
   .4956514E-02   .4886456E-02   .4786319E-02   .4685865E-02   .4642568E-02
   .4642076E-02   .4636953E-02   .4611893E-02   .4557595E-02   .4461281E-02
   .4352818E-02   .4228995E-02   .4103847E-02   .3983828E-02   .3892108E-02
   .3845915E-02   .3823091E-02   .3804391E-02   .3819090E-02   .3848052E-02
   .3820523E-02   .3740632E-02   .3660285E-02   .3619982E-02   .3628716E-02
   .3659953E-02   .3688901E-02   .3700177E-02   .3673869E-02   .3616226E-02
   .3578717E-02   .3604268E-02   .3687396E-02   .3782924E-02   .3848098E-02
   .3872303E-02   .3879689E-02   .3884228E-02   .3864067E-02   .3804707E-02
   .3725114E-02   .3665263E-02   .3646808E-02   .3665631E-02   .3694658E-02
   .3725922E-02   .3776827E-02   .3830274E-02   .3850843E-02   .3835967E-02
   .3810765E-02   .3786924E-02   .3747404E-02   .3722603E-02   .3722942E-02
   .3693191E-02   .3641281E-02   .3594092E-02   .3574151E-02   .3588018E-02
   .3579503E-02   .3515179E-02   .3441762E-02   .3421877E-02   .3448278E-02
   .3470157E-02   .3469791E-02   .3491968E-02   .3571099E-02   .3673860E-02
   .3755373E-02   .3815494E-02   .3867003E-02   .3931290E-02   .3991902E-02
   .4057492E-02   .4144339E-02   .4205583E-02   .4224882E-02   .4250006E-02
   .4284008E-02   .4276219E-02   .4249229E-02   .4238454E-02   .4223214E-02
   .4226404E-02   .4261632E-02   .4284205E-02   .4247026E-02   .4189407E-02
   .4179413E-02   .4217448E-02   .4280541E-02   .4344755E-02   .4383557E-02
   .4402440E-02   .4425889E-02   .4444923E-02   .4440568E-02   .4449888E-02
   .4486460E-02   .4549415E-02   .4611956E-02   .4637891E-02   .4642609E-02
   .4666501E-02   .4739790E-02   .4863188E-02   .4983706E-02   .5045401E-02
   .5076286E-02   .5134899E-02   .5227957E-02   .5340407E-02   .5442684E-02
   .5510026E-02   .5545007E-02   .5563053E-02   .5585241E-02   .5586663E-02
   .5565896E-02   .5568854E-02   .5623304E-02   .5679940E-02   .5664909E-02
   .5595715E-02   .5519512E-02   .5483389E-02   .5520999E-02   .5600456E-02
   .5656213E-02   .5670147E-02   .5666046E-02   .5671271E-02   .5687521E-02
   .5706298E-02   .5719841E-02   .5731235E-02   .5738613E-02   .5736508E-02
   .5733886E-02   .5716933E-02   .5663997E-02   .5576793E-02   .5470850E-02
   .5383617E-02   .5342690E-02   .5335255E-02   .5331446E-02   .5320068E-02
   .5317447E-02   .5325361E-02   .5325984E-02   .5311285E-02   .5285008E-02
   .5245457E-02   .5197782E-02   .5147178E-02   .5099376E-02   .5049585E-02
   .4977963E-02   .4861478E-02   .4716110E-02   .4565258E-02   .4437019E-02
   .4360417E-02   .4322183E-02   .4288652E-02   .4227575E-02   .4150325E-02
   .4077568E-02   .3988126E-02   .3860431E-02   .3756534E-02   .3738608E-02
   .3755430E-02   .3713306E-02   .3608468E-02   .3505664E-02   .3412512E-02
   .3312426E-02   .3215564E-02   .3134568E-02   .3066024E-02   .3002026E-02
   .2949129E-02   .2899200E-02   .2816487E-02   .2675073E-02   .2505139E-02
   .2368278E-02   .2286564E-02   .2239965E-02   .2218986E-02   .2202295E-02
   .2152287E-02   .2035158E-02   .1852473E-02   .1646499E-02   .1462729E-02
   .1309150E-02   .1176289E-02   .1021376E-02   .8102862E-03   .5608033E-03
   .2894756E-03   .3177304E-04  -.2037954E-03  -.4292691E-03  -.6526502E-03
  -.8648757E-03  -.1039363E-02  -.1174720E-02  -.1305232E-02  -.1451810E-02
  -.1612541E-02  -.1764214E-02  -.1886513E-02  -.2010886E-02  -.2149678E-02
  -.2291379E-02  -.2410085E-02  -.2496058E-02  -.2579339E-02  -.2642713E-02
  -.2659473E-02  -.2657315E-02  -.2676319E-02  -.2751049E-02  -.2866501E-02
  -.2982241E-02  -.3071383E-02  -.3136412E-02  -.3202596E-02  -.3265212E-02
  -.3313309E-02  -.3353315E-02  -.3385172E-02  -.3417474E-02  -.3444169E-02
  -.3406876E-02  -.3318810E-02  -.3229530E-02  -.3155476E-02  -.3088644E-02
  -.3007437E-02  -.2915465E-02  -.2833891E-02  -.2766416E-02  -.2690955E-02
  -.2603389E-02  -.2525786E-02  -.2479751E-02  -.2451297E-02  -.2409726E-02
  -.2350499E-02  -.2301883E-02  -.2293402E-02  -.2332302E-02  -.2351642E-02
  -.2294546E-02  -.2215917E-02  -.2173829E-02  -.2172625E-02  -.2180032E-02
  -.2117132E-02  -.2002502E-02  -.1901192E-02  -.1839174E-02  -.1812756E-02
  -.1765204E-02  -.1712831E-02  -.1711838E-02  -.1783636E-02  -.1892364E-02
  -.1951648E-02  -.1962047E-02  -.1996282E-02  -.2096836E-02  -.2216651E-02
  -.2313119E-02  -.2395281E-02  -.2468784E-02  -.2551393E-02  -.2632656E-02
  -.2688699E-02  -.2711547E-02  -.2714028E-02  -.2721535E-02  -.2725777E-02
  -.2717119E-02  -.2726076E-02  -.2780029E-02  -.2834272E-02  -.2838747E-02
  -.2791784E-02  -.2721371E-02  -.2648002E-02  -.2577426E-02  -.2543760E-02
  -.2526875E-02  -.2463095E-02  -.2342832E-02  -.2215566E-02  -.2113118E-02
  -.2034872E-02  -.1966598E-02  -.1894529E-02  -.1840793E-02  -.1799831E-02
  -.1736863E-02  -.1631572E-02  -.1517187E-02  -.1411715E-02  -.1315417E-02
  -.1240551E-02  -.1198929E-02  -.1169690E-02  -.1114658E-02  -.1045713E-02
  -.9893061E-03  -.9432069E-03  -.8994010E-03  -.8883743E-03  -.9420044E-03
  -.1025409E-02  -.1091383E-02  -.1146560E-02  -.1231218E-02  -.1337313E-02
  -.1448310E-02  -.1559678E-02  -.1678731E-02  -.1802048E-02  -.1924028E-02
  -.2019448E-02  -.2074623E-02  -.2114357E-02  -.2160903E-02  -.2198018E-02
  -.2201654E-02  -.2195490E-02  -.2164119E-02  -.2088046E-02  -.1999171E-02
  -.1938815E-02  -.1880843E-02  -.1756336E-02  -.1580959E-02  -.1454196E-02
  -.1427356E-02  -.1458240E-02  -.1487022E-02  -.1508992E-02  -.1541378E-02
  -.1566296E-02  -.1581111E-02  -.1619536E-02  -.1716024E-02  -.1842971E-02
  -.1947079E-02  -.2025961E-02  -.2094755E-02  -.2141894E-02  -.2158942E-02
  -.2168759E-02  -.2196967E-02  -.2268781E-02  -.2362344E-02  -.2448981E-02
  -.2523131E-02  -.2582903E-02  -.2622071E-02  -.2651272E-02  -.2696265E-02
  -.2774047E-02  -.2867240E-02  -.2945577E-02  -.3002246E-02  -.3052032E-02
  -.3092402E-02  -.3075939E-02  -.3017363E-02  -.2965386E-02  -.2956329E-02
  -.3027611E-02  -.3129724E-02  -.3219333E-02  -.3333367E-02  -.3473906E-02
  -.3601424E-02  -.3693413E-02  -.3767258E-02  -.3847893E-02  -.3958266E-02
  -.4098874E-02  -.4253940E-02  -.4401792E-02  -.4527714E-02  -.4641978E-02
  -.4762994E-02  -.4859624E-02  -.4898417E-02  -.4927740E-02  -.5012570E-02
  -.5120897E-02  -.5196671E-02  -.5244189E-02  -.5266287E-02  -.5280132E-02
  -.5317728E-02  -.5360859E-02  -.5401411E-02  -.5449246E-02  -.5483533E-02
  -.5469008E-02  -.5406518E-02  -.5335795E-02  -.5265734E-02  -.5187649E-02
  -.5103194E-02  -.5005399E-02  -.4893768E-02  -.4798257E-02  -.4721682E-02
  -.4650650E-02  -.4589818E-02  -.4525471E-02  -.4446533E-02  -.4363488E-02
  -.4300242E-02  -.4292105E-02  -.4319362E-02  -.4337786E-02  -.4309817E-02
  -.4250080E-02  -.4206819E-02  -.4204670E-02  -.4249563E-02  -.4305798E-02
  -.4340769E-02  -.4390486E-02  -.4475871E-02  -.4568420E-02  -.4652354E-02
  -.4721549E-02  -.4766843E-02  -.4816610E-02  -.4929533E-02  -.5136177E-02
  -.5397040E-02  -.5669166E-02  -.5903806E-02  -.6079174E-02  -.6223116E-02
  -.6360537E-02  -.6502424E-02  -.6648145E-02  -.6807630E-02  -.6977239E-02
  -.7141410E-02  -.7240727E-02  -.7231817E-02  -.7122883E-02  -.6974330E-02
  -.6839548E-02  -.6715257E-02  -.6575421E-02  -.6423815E-02  -.6254254E-02
  -.6048950E-02  -.5804435E-02  -.5561061E-02  -.5347778E-02  -.5173610E-02
  -.5048332E-02  -.4953355E-02  -.4864620E-02  -.4763113E-02  -.4634075E-02
  -.4461349E-02  -.4270745E-02  -.4103737E-02  -.3956528E-02  -.3824369E-02
  -.3735338E-02  -.3649954E-02  -.3512200E-02  -.3312889E-02  -.3083972E-02
  -.2863022E-02  -.2691771E-02  -.2580026E-02  -.2500359E-02  -.2417384E-02
  -.2329486E-02  -.2267130E-02  -.2230594E-02  -.2190480E-02  -.2134333E-02
  -.2082580E-02  -.2041881E-02  -.2003088E-02  -.1991356E-02  -.2043197E-02
  -.2132319E-02  -.2183611E-02  -.2195856E-02  -.2247298E-02  -.2350721E-02
  -.2441752E-02  -.2501523E-02  -.2559004E-02  -.2650584E-02  -.2807120E-02
  -.3012496E-02  -.3215887E-02  -.3376545E-02  -.3497858E-02  -.3622961E-02
  -.3786982E-02  -.3984995E-02  -.4162010E-02  -.4295507E-02  -.4417468E-02
  -.4556565E-02  -.4650478E-02  -.4662428E-02  -.4627827E-02  -.4573092E-02
  -.4522994E-02  -.4453007E-02  -.4337648E-02  -.4203181E-02  -.4069881E-02
  -.3944948E-02  -.3819255E-02  -.3688164E-02  -.3538370E-02  -.3381981E-02
  -.3239899E-02  -.3143081E-02  -.3106668E-02  -.3098380E-02  -.3096568E-02
  -.3085030E-02  -.3066470E-02  -.3059752E-02  -.3042012E-02  -.3005422E-02
  -.2988857E-02  -.3008034E-02  -.3047314E-02  -.3080989E-02  -.3105958E-02
  -.3109021E-02  -.3034552E-02  -.2894804E-02  -.2767830E-02  -.2696483E-02
  -.2672960E-02  -.2682336E-02  -.2739165E-02  -.2832566E-02  -.2949730E-02
  -.3038266E-02  -.3057471E-02  -.3057085E-02  -.3118009E-02  -.3245979E-02
  -.3415527E-02  -.3605143E-02  -.3797528E-02  -.3991691E-02  -.4182836E-02
  -.4411445E-02  -.4720539E-02  -.5091542E-02  -.5460871E-02  -.5767163E-02
  -.6047787E-02  -.6375198E-02  -.6766394E-02  -.7197878E-02  -.7661546E-02
  -.8152306E-02  -.8666230E-02  -.9202571E-02  -.9722715E-02  -.1021006E-01
  -.1067309E-01  -.1109794E-01  -.1148078E-01  -.1184365E-01  -.1221631E-01
  -.1257095E-01  -.1288133E-01  -.1315879E-01  -.1340110E-01  -.1358671E-01
  -.1372822E-01  -.1383335E-01  -.1388852E-01  -.1389359E-01  -.1387798E-01
  -.1386293E-01  -.1384779E-01  -.1383417E-01  -.1381097E-01  -.1377292E-01
  -.1369808E-01  -.1360931E-01  -.1353252E-01  -.1344857E-01  -.1335038E-01
  -.1322313E-01  -.1306935E-01  -.1293686E-01  -.1282196E-01  -.1264640E-01
  -.1239352E-01  -.1212576E-01  -.1187222E-01  -.1160909E-01  -.1132851E-01
  -.1102786E-01  -.1072770E-01  -.1043632E-01  -.1013628E-01  -.9830004E-02
  -.9524910E-02  -.9231360E-02  -.8956164E-02  -.8693642E-02  -.8440422E-02
  -.8218477E-02  -.8038686E-02  -.7900107E-02  -.7791079E-02  -.7706371E-02
  -.7633413E-02  -.7587827E-02  -.7596240E-02  -.7643147E-02  -.7683034E-02
  -.7694868E-02  -.7673595E-02  -.7636064E-02  -.7619906E-02  -.7623834E-02
  -.7612708E-02  -.7578652E-02  -.7503391E-02  -.7386682E-02  -.7251874E-02
  -.7121652E-02  -.7019368E-02  -.6921283E-02  -.6813501E-02  -.6727151E-02
  -.6670873E-02  -.6614354E-02  -.6517953E-02  -.6361518E-02  -.6163818E-02
  -.5981338E-02  -.5870946E-02  -.5823206E-02  -.5781833E-02  -.5713886E-02
  -.5631490E-02  -.5566964E-02  -.5520985E-02  -.5460350E-02  -.5352804E-02
  -.5240350E-02  -.5203795E-02  -.5267352E-02  -.5365116E-02  -.5402258E-02
  -.5365710E-02  -.5309006E-02  -.5271425E-02  -.5271671E-02  -.5273256E-02
  -.5256520E-02  -.5246225E-02  -.5278676E-02  -.5346328E-02  -.5407110E-02
  -.5462980E-02  -.5502610E-02  -.5527963E-02  -.5579431E-02  -.5640028E-02
  -.5690239E-02  -.5726902E-02  -.5719719E-02  -.5679014E-02  -.5633878E-02
  -.5599699E-02  -.5576454E-02  -.5541994E-02  -.5476366E-02  -.5372194E-02
  -.5238689E-02  -.5095605E-02  -.4956201E-02  -.4829522E-02  -.4738249E-02
  -.4692833E-02  -.4702685E-02  -.4738756E-02  -.4744914E-02  -.4725287E-02
  -.4707265E-02  -.4695748E-02  -.4727844E-02  -.4831683E-02  -.4982359E-02
  -.5118291E-02  -.5206824E-02  -.5247385E-02  -.5273798E-02  -.5330432E-02
  -.5376310E-02  -.5372965E-02  -.5330902E-02  -.5283404E-02  -.5256562E-02
  -.5237023E-02  -.5165752E-02  -.5034320E-02  -.4922993E-02  -.4865933E-02
  -.4855013E-02  -.4878541E-02  -.4909296E-02  -.4936402E-02  -.4965369E-02
  -.5001572E-02  -.5082582E-02  -.5196445E-02  -.5274513E-02  -.5295148E-02
  -.5289006E-02  -.5289731E-02  -.5286548E-02  -.5259538E-02  -.5212758E-02
  -.5181730E-02  -.5174250E-02  -.5142892E-02  -.5080802E-02  -.5017452E-02
  -.4942985E-02  -.4883061E-02  -.4893010E-02  -.4953946E-02  -.5001398E-02
  -.4979308E-02  -.4910615E-02  -.4875912E-02  -.4898559E-02  -.4911118E-02
  -.4882937E-02  -.4838909E-02  -.4813794E-02  -.4805308E-02  -.4804346E-02
  -.4806626E-02  -.4806357E-02  -.4816461E-02  -.4850043E-02  -.4901864E-02
  -.4952350E-02  -.4984808E-02  -.5023298E-02  -.5101483E-02  -.5215255E-02
  -.5333227E-02  -.5421255E-02  -.5476508E-02  -.5526989E-02  -.5574617E-02
  -.5606521E-02  -.5622706E-02  -.5656548E-02  -.5726939E-02  -.5777859E-02
  -.5772429E-02  -.5733467E-02  -.5650277E-02  -.5530548E-02  -.5396072E-02
  -.5262884E-02  -.5124789E-02  -.4973698E-02  -.4826452E-02  -.4700949E-02
  -.4580946E-02  -.4453274E-02  -.4310600E-02  -.4156213E-02  -.4007202E-02
  -.3870934E-02  -.3741076E-02  -.3620803E-02  -.3540395E-02  -.3477336E-02
  -.3411276E-02  -.3367313E-02  -.3365653E-02  -.3377855E-02  -.3378844E-02
  -.3366109E-02  -.3374980E-02  -.3427425E-02  -.3502993E-02  -.3580674E-02
  -.3635747E-02  -.3667541E-02  -.3687502E-02  -.3678351E-02  -.3664156E-02
  -.3672418E-02  -.3683846E-02  -.3653664E-02  -.3548620E-02  -.3403058E-02
  -.3269376E-02  -.3171054E-02  -.3096199E-02  -.3016715E-02  -.2931930E-02
  -.2828156E-02  -.2693105E-02  -.2548298E-02  -.2426860E-02  -.2322761E-02
  -.2191594E-02  -.2015832E-02  -.1836399E-02  -.1700558E-02  -.1590856E-02
  -.1489264E-02  -.1415714E-02  -.1382040E-02  -.1398778E-02  -.1446759E-02
  -.1496219E-02  -.1541590E-02  -.1593189E-02  -.1669767E-02  -.1779911E-02
  -.1921445E-02  -.2062850E-02  -.2155000E-02  -.2209558E-02  -.2284527E-02
  -.2417109E-02  -.2591922E-02  -.2764761E-02  -.2926592E-02  -.3053583E-02
  -.3099361E-02  -.3083660E-02  -.3069171E-02  -.3108648E-02  -.3209319E-02
  -.3340133E-02  -.3483408E-02  -.3645266E-02  -.3825436E-02  -.3965095E-02
  -.4018410E-02  -.3993781E-02  -.3941103E-02  -.3909648E-02  -.3932940E-02
  -.4037731E-02  -.4182527E-02  -.4307144E-02  -.4396207E-02  -.4443502E-02
  -.4443611E-02  -.4409035E-02  -.4405608E-02  -.4486044E-02  -.4602718E-02
  -.4715932E-02  -.4826016E-02  -.4882508E-02  -.4876049E-02  -.4856292E-02
  -.4829367E-02  -.4808669E-02  -.4828433E-02  -.4866560E-02  -.4901697E-02
  -.4928945E-02  -.4949842E-02  -.4961656E-02  -.4949057E-02  -.4899746E-02
  -.4857410E-02  -.4846714E-02  -.4860233E-02  -.4889362E-02  -.4914858E-02
  -.4935899E-02  -.4952183E-02  -.4906317E-02  -.4764347E-02  -.4614161E-02
  -.4537729E-02  -.4445654E-02  -.4265942E-02  -.4049988E-02  -.3840850E-02
  -.3643744E-02  -.3463246E-02  -.3299638E-02  -.3161744E-02  -.3046763E-02
  -.2924099E-02  -.2760150E-02  -.2588563E-02  -.2464977E-02  -.2380722E-02
  -.2303307E-02  -.2226352E-02  -.2172006E-02  -.2145362E-02  -.2103425E-02
  -.2030762E-02  -.1971372E-02  -.1934014E-02  -.1919248E-02  -.1934048E-02
  -.1942246E-02  -.1907810E-02  -.1848709E-02  -.1787181E-02  -.1711394E-02
  -.1612716E-02  -.1479163E-02  -.1312481E-02  -.1149036E-02  -.9900492E-03
  -.8211553E-03  -.6175732E-03  -.3495491E-03  -.5642240E-04   .2032160E-03
   .4170337E-03   .6097757E-03   .7735670E-03   .9004014E-03   .1027132E-02
   .1200082E-02   .1450598E-02   .1727736E-02   .1952198E-02   .2141217E-02
   .2343324E-02   .2568520E-02   .2793498E-02   .3017328E-02   .3286006E-02
   .3625166E-02   .4001815E-02   .4357426E-02   .4659997E-02   .4898903E-02
   .5084696E-02   .5247755E-02   .5417241E-02   .5608803E-02   .5778308E-02
   .5843433E-02   .5825763E-02   .5787885E-02   .5747142E-02   .5703114E-02
   .5634284E-02   .5524012E-02   .5384448E-02   .5252893E-02   .5177489E-02
   .5142290E-02   .5107055E-02   .5059459E-02   .5008663E-02   .4945547E-02
   .4870525E-02   .4830730E-02   .4857432E-02   .4923759E-02   .4975394E-02
   .5001699E-02   .5026899E-02   .5056122E-02   .5092041E-02   .5149139E-02
   .5206266E-02   .5228567E-02   .5215854E-02   .5189793E-02   .5160763E-02
   .5146821E-02   .5156699E-02   .5180983E-02   .5179229E-02   .5120854E-02
   .5044378E-02   .4958787E-02   .4853363E-02   .4769120E-02   .4716725E-02
   .4680639E-02   .4654601E-02   .4618075E-02   .4548454E-02   .4460546E-02
   .4362073E-02   .4271944E-02   .4217309E-02   .4232440E-02   .4314625E-02
   .4390439E-02   .4433924E-02   .4474921E-02   .4531473E-02   .4587653E-02
   .4607797E-02   .4593057E-02   .4545512E-02   .4472024E-02   .4413425E-02
   .4411664E-02   .4457836E-02   .4484450E-02   .4441719E-02   .4337434E-02
   .4222375E-02   .4139060E-02   .4111648E-02   .4169150E-02   .4310070E-02
   .4518653E-02   .4744541E-02   .4910412E-02   .5005108E-02   .5075099E-02
   .5130198E-02   .5164906E-02   .5238829E-02   .5406079E-02   .5674927E-02
   .5993639E-02   .6271518E-02   .6452468E-02   .6520042E-02   .6529259E-02
   .6540397E-02   .6582517E-02   .6697795E-02   .6889819E-02   .7080027E-02
   .7216110E-02   .7289793E-02   .7273749E-02   .7177533E-02   .7108670E-02
   .7158055E-02   .7321231E-02   .7553258E-02   .7782362E-02   .7928886E-02
   .7960844E-02   .7908718E-02   .7844877E-02   .7824222E-02   .7835834E-02
   .7881190E-02   .7956217E-02   .8036988E-02   .8123570E-02   .8197494E-02
   .8233777E-02   .8219442E-02   .8178034E-02   .8154564E-02   .8141223E-02
   .8094933E-02   .7999739E-02   .7898215E-02   .7828957E-02   .7790312E-02
   .7762548E-02   .7760203E-02   .7783696E-02   .7799165E-02   .7795660E-02
   .7808111E-02   .7836939E-02   .7842718E-02   .7840448E-02   .7851108E-02
   .7867734E-02   .7897335E-02   .7937782E-02   .7989640E-02   .8054600E-02
   .8123832E-02   .8149546E-02   .8082557E-02   .7938413E-02   .7769354E-02
[truncated: 170,241 more chars]
