# Supplementary material for: Earthquake Response Analysis of Tall Reinforced Concrete Chimneys considering Eccentricity
Source: Hindawi journal article supplement (doi:10.1155/2020/1417969), 2020-03-11
Supplement: f1 [file 1417969.f1.zip › 1417969.f1/Four kinds of earthquake records/Soft soil/CHICHI CHY004-V.txt]

PEER STRONG MOTION DATABASE RECORD. PROCESSING BY PACIFIC ENGINEERING.
CHI-CHI 09/20/99, CHY004, V (CWB)
ACCELERATION TIME HISTORY IN UNITS OF G. FILTER POINTS: HP=0.05 Hz LP=50.0 Hz
NPTS= 37500, DT= .00400 SEC
  -.7418172E-07  -.6657960E-07  -.5426267E-07  -.4526358E-07  -.4597063E-07
  -.5017013E-07  -.5514091E-07  -.5522225E-07  -.5475061E-07  -.5381333E-07
  -.5517526E-07  -.5714837E-07  -.5903418E-07  -.5643802E-07  -.5436572E-07
  -.5479636E-07  -.5877768E-07  -.6549476E-07  -.6959251E-07  -.6949932E-07
  -.7027924E-07  -.6506379E-07  -.5792748E-07  -.6062829E-07  -.6979015E-07
  -.6771793E-07  -.6168761E-07  -.6118702E-07  -.6091927E-07  -.5820680E-07
  -.5444660E-07  -.4341047E-07  -.3924282E-07  -.4945249E-07  -.6804407E-07
  -.6649580E-07  -.4434203E-07  -.1916146E-07  -.7019428E-08  -.3445860E-07
  -.6189779E-07  -.3986047E-07  -.2469166E-07  -.7599601E-07  -.1445298E-06
  -.1392564E-06  -.9125846E-07  -.8749839E-07  -.1195942E-06  -.1273593E-06
  -.1025281E-06  -.5301683E-07  -.8278612E-08  -.2035107E-07  -.7666136E-07
  -.1179541E-06  -.1247879E-06  -.1105505E-06  -.1124949E-06  -.1522742E-06
  -.1713317E-06  -.1084327E-06  -.4704717E-07  -.5911970E-07  -.1020423E-06
  -.7569780E-07  -.1096199E-09   .8772567E-08  -.7023882E-07  -.1338834E-06
  -.9799287E-07  -.4720119E-07  -.6777211E-07  -.1279242E-06  -.1486116E-06
  -.6755197E-07   .2642976E-07  -.4094016E-07  -.1918963E-06  -.2612453E-06
  -.2628406E-06  -.1571009E-06   .9873157E-08   .4902319E-07  -.3161811E-07
   .2185102E-07   .1570437E-06   .1435739E-06   .4896282E-07   .6459688E-07
   .2283113E-06   .3205467E-06   .1499162E-06  -.1073272E-06  -.1437307E-06
   .9390740E-07   .4643753E-06   .6110930E-06   .3926159E-06   .1790934E-07
  -.2503936E-06  -.2755050E-06  -.1311156E-06  -.1372512E-06  -.2908851E-06
  -.3537150E-06  -.2903508E-06  -.2423533E-06  -.3529136E-06  -.4821002E-06
  -.5458615E-06  -.4883180E-06  -.2733812E-06   .1466796E-06   .4889750E-06
   .5055403E-06   .3446885E-06   .2045587E-06   .7467343E-07   .1487023E-07
  -.4074207E-07  -.1743527E-06  -.2220487E-06   .6320304E-07   .2723191E-06
   .9959303E-07   .9070104E-09   .2901169E-06   .4226317E-06   .1260395E-06
  -.1195626E-06  -.1665603E-06  -.2009850E-06  -.2896594E-06  -.3150038E-06
  -.1284723E-06   .4857324E-08  -.1214192E-06  -.3819226E-06  -.7354418E-06
  -.9836053E-06  -.6337431E-06   .8527197E-07   .3974155E-06   .3144455E-06
   .2877039E-06   .4223142E-06   .5538975E-06   .5780294E-06   .4867938E-06
   .1081288E-06  -.5628551E-06  -.9525796E-06  -.7219269E-06  -.5774347E-07
   .5555665E-06   .6490819E-06  -.8942297E-07  -.1105695E-05  -.1317188E-05
  -.4034097E-06   .8490203E-06   .1074667E-05   .2069411E-06  -.5851148E-06
  -.3275702E-06   .6857427E-06   .1084382E-05   .6216656E-06   .4348991E-08
  -.2118004E-06  -.5109540E-06  -.1223498E-05  -.1773527E-05  -.1466390E-05
  -.3990599E-06   .2779290E-06   .5002159E-07  -.5110664E-06  -.6017202E-06
   .3596714E-06   .1622229E-05   .1543334E-05   .3229854E-06  -.5074878E-06
  -.7339982E-06  -.5492134E-06  -.6822424E-06  -.1356253E-05  -.1604650E-05
  -.1108455E-05  -.6018974E-06  -.8238676E-06  -.1297644E-05  -.1581664E-05
  -.1303514E-05  -.2766974E-06   .8548932E-06   .1265058E-05   .6250402E-06
  -.1865737E-06   .1461749E-06   .8039550E-06   .9617310E-06   .9164795E-06
   .8539980E-06   .5281851E-06   .2367148E-06  -.1435950E-07  -.4001263E-06
  -.7161604E-06  -.9243938E-06  -.1337868E-05  -.1550641E-05  -.1088439E-05
  -.1094688E-06   .3668197E-06  -.2013699E-06  -.1487959E-05  -.2650099E-05
  -.2954259E-05  -.2044905E-05  -.3466052E-06   .4252618E-06  -.4487509E-06
  -.9370799E-06   .1034738E-06   .1343215E-05   .1023105E-05  -.8581328E-06
  -.1880459E-05  -.3970614E-06   .1355489E-05   .1687073E-05   .1328372E-05
   .1051628E-05   .5238925E-06  -.3561157E-06  -.9889161E-06  -.1094268E-05
  -.7644006E-06   .1310411E-06   .1093174E-05   .9261008E-06  -.8001447E-07
  -.2129929E-06   .6711711E-06   .1042395E-05   .7408250E-06   .2463841E-06
   .3309349E-06   .1112755E-05   .1812124E-05   .1970540E-05   .1771329E-05
   .1629481E-05   .1335711E-05  -.3167711E-06  -.2513524E-05  -.2319659E-05
   .3778409E-07   .1289544E-05   .3203031E-06  -.1340794E-05  -.2592844E-05
  -.2487620E-05  -.4556179E-06   .2498472E-05   .3914426E-05   .3143104E-05
   .1669851E-05   .7723516E-07  -.1812560E-05  -.2583458E-05  -.1197675E-05
   .1021931E-06  -.1052090E-05  -.3590318E-05  -.4940819E-05  -.3643949E-05
  -.6477638E-06   .9954721E-06   .4519615E-06  -.3417252E-06  -.1272666E-05
  -.2066993E-05  -.1758517E-05  -.2953763E-06   .8202065E-06   .8094711E-06
  -.9871008E-07   .1214429E-05   .3379438E-05   .1918808E-05  -.1524258E-05
  -.3099383E-05  -.1793577E-05   .1285059E-05   .3295061E-05   .4381480E-05
   .3674174E-05   .6183631E-06  -.3081807E-05  -.5248030E-05  -.4461437E-05
  -.1949336E-05   .9626506E-06   .3720388E-05   .4548366E-05   .2563053E-05
   .6495671E-06   .9293459E-06   .2358144E-05   .2918134E-05   .1454128E-05
  -.6371239E-06  -.6070561E-06   .1392178E-05   .3371503E-05   .4456643E-05
   .3165630E-05   .2891565E-06  -.6357305E-06   .1054769E-05   .3016400E-05
   .3266492E-05   .1346604E-05  -.1169797E-05  -.2389913E-05  -.2186270E-05
  -.1870519E-05  -.2881320E-05  -.3418545E-05  -.2114777E-05  -.2586924E-05
  -.3676889E-05  -.7771832E-06   .3462578E-05   .3628736E-05   .1452732E-06
  -.2442025E-05  -.1199608E-05   .1789853E-05   .2532150E-05   .1416925E-05
  -.1101793E-06  -.1385709E-05  -.2020839E-05  -.1737917E-05  -.2753589E-06
   .8421444E-06   .1191422E-05   .1978506E-06  -.2905983E-05  -.6413892E-05
  -.7425393E-05  -.4176791E-05   .3701913E-06   .4108669E-05   .5690087E-05
   .4542847E-05   .1451121E-05  -.1589382E-05  -.2461999E-05  -.7348286E-06
   .9972310E-06   .1561644E-05   .3188274E-06  -.2568240E-05  -.3148189E-05
  -.1454314E-05  -.2121298E-06   .5420410E-06   .7299678E-06   .9081155E-06
   .4860260E-06  -.9370027E-06  -.1920679E-05  -.4659361E-07   .3799102E-05
   .3560716E-05   .7823805E-06   .5882320E-06   .2825301E-05   .4612542E-05
   .4665892E-05   .3897583E-05   .3877591E-05   .5252722E-05   .4811773E-05
   .2855096E-05   .1837658E-05   .1192983E-05   .9422569E-06   .2566025E-06
  -.9470998E-06  -.2541636E-06   .2009448E-05   .2110063E-05  -.5206580E-06
  -.3398413E-05  -.5591180E-05  -.5823279E-05  -.3626257E-05  -.5200317E-06
  -.1235954E-05  -.5261331E-05  -.5151402E-05   .3352838E-06   .4981218E-05
   .4214074E-05   .1725612E-05   .9766277E-06  -.5823741E-06  -.1684329E-05
  -.1055655E-05   .1094801E-05   .3652943E-05   .5034360E-05   .4184094E-05
  -.4869221E-06  -.4218933E-05  -.1064511E-05   .3176997E-05   .1682023E-05
  -.4711008E-05  -.1000182E-04  -.9720995E-05  -.7007554E-05  -.4845224E-05
  -.2984409E-05   .1306637E-06   .3777988E-05   .5771516E-05   .5258156E-05
   .2042797E-05  -.1847073E-05  -.3818419E-05  -.3590911E-05  -.3199258E-05
  -.4919146E-05  -.6264176E-05  -.5563790E-05  -.4986571E-05  -.3144617E-05
  -.4027705E-06   .1800770E-05   .1496260E-05  -.5956916E-06  -.1197294E-05
  -.2534875E-05  -.4126706E-05  -.1277060E-05   .5503233E-05   .7505609E-05
   .2271607E-05  -.4173346E-05  -.7511873E-05  -.4520665E-05   .2455903E-05
   .6669937E-05   .4804297E-05   .1370543E-05  -.7072068E-06  -.2028256E-05
  -.2973051E-05  -.2319930E-05   .2784215E-05   .8341683E-05   .8732637E-05
   .3531231E-05  -.3059008E-05  -.7874148E-05  -.7837095E-05  -.2519910E-05
   .2107863E-05   .3293701E-05   .1821078E-05   .9123725E-06  -.2668833E-06
  -.3349762E-05  -.9080010E-07   .1086950E-04   .1442928E-04   .6166852E-05
  -.1086491E-05   .3272887E-06   .5081722E-05   .4708759E-05  -.5995155E-06
  -.4945268E-05  -.4273287E-05   .2844843E-05   .9157030E-05   .6769849E-05
  -.3704540E-06  -.2263335E-05   .1853840E-05   .3620009E-05   .4038515E-07
  -.3700822E-05  -.1767133E-05   .3438991E-05   .4205968E-05  -.4337338E-06
  -.3632795E-05   .1367041E-05   .8988784E-05   .1098697E-04   .8166722E-05
   .4206770E-05  -.1938648E-05  -.7176142E-05  -.7524076E-05  -.4895154E-05
  -.3021302E-05  -.2560498E-05  -.1353229E-07   .3266384E-05   .9297273E-06
  -.1858621E-05   .3465491E-06   .2847182E-05   .3118228E-05   .2180650E-05
   .4873600E-05   .9965870E-05   .1309025E-04   .8952888E-05   .1172882E-05
   .5922340E-06   .4089149E-05   .4379170E-05  -.1041678E-05  -.5412810E-05
  -.6559468E-05  -.4093062E-05  -.4026658E-06   .2823350E-05   .5083585E-05
   .3135871E-05  -.1974031E-05  -.4996724E-05  -.2382354E-05   .1277309E-05
   .2955117E-05   .1223354E-05  -.1953356E-05  -.1687315E-05   .4747808E-06
   .2247119E-05   .1962165E-05   .2112139E-05   .4016027E-05   .3043058E-05
  -.1638204E-05  -.4923064E-05  -.2582445E-05   .1174833E-05   .2317480E-05
  -.3207793E-05  -.1302076E-04  -.1870727E-04  -.1449091E-04  -.2456324E-05
   .7318868E-05   .7287583E-05   .2660804E-05  -.4611910E-06   .1009398E-05
   .5639965E-05   .8987578E-05   .9206527E-05   .9591486E-05   .1482479E-04
   .1474298E-04   .4329313E-05  -.5536970E-05  -.5975941E-05  -.4874098E-05
  -.4298335E-05   .5573337E-05   .1666464E-04   .1556419E-04   .1066221E-05
  -.9493637E-05  -.4750605E-07   .1084128E-04   .5419768E-05  -.1240903E-05
  -.1253155E-05  -.3108145E-06   .1578230E-05   .4505662E-05   .3392485E-05
  -.1331348E-05  -.1547464E-05   .3217639E-05   .4952014E-05   .3990803E-05
   .5004389E-05   .6738477E-05   .4768964E-05   .1768688E-05  -.9390212E-06
  -.2303050E-05   .3657015E-05   .1175223E-04   .1365989E-04   .9405531E-05
   .2575211E-05   .3012788E-06   .3343212E-05   .4317938E-05   .2715538E-05
  -.4130396E-06  -.4407104E-05  -.6052228E-05  -.2584217E-05   .3645116E-06
  -.1899852E-05  -.6002326E-05  -.8840270E-05  -.1109543E-04  -.8234296E-05
  -.3007449E-05  -.1148004E-05  -.1772634E-07  -.2557069E-06  -.3167020E-05
  -.6410640E-05  -.6642218E-05  -.1164672E-05   .6795663E-05   .1033323E-04
   .5198128E-05  -.3785408E-05  -.9848957E-05  -.1346522E-04  -.1450545E-04
  -.1388041E-04  -.7428037E-05   .3031735E-05   .4907333E-05  -.4686598E-05
  -.9059593E-05  -.3159564E-06   .8683036E-05   .3963124E-05  -.3389579E-05
  -.1198961E-05   .2300455E-05   .4706696E-06   .2657544E-07   .3998813E-05
   .4295353E-05  -.1600179E-05  -.7531626E-05  -.9039408E-05  -.6425969E-05
   .2280116E-06   .8913906E-05   .1721132E-04   .1947702E-04   .1375513E-04
   .4105375E-05   .1328492E-06   .4630586E-05   .1057839E-04   .1247669E-04
   .1095867E-04   .9415027E-05   .9275127E-05   .9987387E-05   .9288923E-05
   .4751434E-05   .9146476E-06  -.4223523E-06   .1812153E-05   .8047388E-05
   .1646774E-04   .1867407E-04   .8674493E-05  -.5170170E-05  -.1195448E-04
  -.1069471E-04  -.6305595E-05  -.6272910E-06   .1009655E-05  -.3196633E-05
  -.8210263E-05  -.8675545E-05  -.2848694E-05   .2094330E-05   .4623600E-05
   .6473120E-05   .3558460E-05  -.4877663E-05  -.1412741E-04  -.1175821E-04
   .9279429E-06   .6482031E-05   .9337073E-06  -.3062801E-05  -.2936228E-05
  -.4108034E-05  -.5815002E-05  -.2958024E-05  -.1136179E-06  -.3838879E-05
  -.1350400E-04  -.1848119E-04  -.1540756E-04  -.1261333E-04  -.8026653E-05
  -.2118778E-05   .5109363E-05   .1450353E-04   .1418388E-04   .1805120E-05
  -.9900180E-05  -.1269237E-04  -.8266347E-05  -.4028106E-06   .2282805E-05
  -.2873833E-06   .3887533E-05   .7827639E-05   .2036239E-05  -.7318167E-05
  -.1062037E-04  -.4305115E-06   .2053173E-04   .2638559E-04   .7768709E-05
  -.1696486E-04  -.2433997E-04  -.1024333E-04   .1944919E-05  -.3507596E-05
  -.7708762E-05   .5915352E-05   .2147802E-04   .2291065E-04   .1357254E-04
   .2450369E-05   .1086244E-05   .1298392E-04   .2292011E-04   .1949054E-04
   .6311432E-05   .4909283E-06   .1095553E-04   .2092141E-04   .1445201E-04
   .4983747E-05   .8478565E-05   .1287304E-04   .9392950E-05   .4359845E-06
  -.8258348E-05  -.1051188E-04  -.2791192E-05   .6364437E-05   .3739667E-06
  -.1204554E-04  -.8772726E-05   .1164946E-04   .2506345E-04   .1500706E-04
  -.2853121E-05  -.1299530E-05   .1371784E-04   .2258255E-04   .2282996E-04
   .1405006E-04   .5164346E-05   .5098251E-05   .1057725E-04   .1149068E-04
  -.3627029E-06  -.9969732E-05  -.9477032E-05  -.7159523E-05  -.6538884E-05
  -.3295756E-05   .1575323E-05   .9592411E-05   .1080456E-04   .1777291E-06
  -.1275808E-04  -.2096417E-04  -.1425652E-04   .2050038E-05   .9094358E-05
   .7051765E-05   .8356810E-05   .1664817E-04   .1589197E-04   .2401788E-05
  -.4274136E-05   .3156843E-06  -.2591876E-05  -.1351695E-04  -.1556677E-04
   .1519303E-05   .1945823E-04   .1533250E-04  -.2258752E-05  -.7745842E-05
   .5024451E-06  -.1136420E-05  -.1288921E-04  -.2017562E-04  -.2433185E-04
  -.2731461E-04  -.1738506E-04   .3203718E-05   .1781456E-04   .1929656E-04
   .1436640E-04   .9878624E-05   .4228086E-05   .2461163E-05   .4596249E-05
  -.3247087E-05  -.1607765E-04  -.1832421E-04  -.5471696E-05   .1118829E-04
   .1727940E-04   .7604392E-05  -.7787314E-05  -.1579037E-04  -.1461199E-04
  -.1101100E-04  -.8053090E-05  -.5653508E-05  -.1447170E-04  -.2015484E-04
  -.1202228E-04  -.2379841E-06  -.3132971E-05  -.1528298E-04  -.2121803E-04
  -.2156818E-04  -.1175271E-04   .5657462E-05   .1793954E-04   .1951479E-04
   .1419533E-04   .3372462E-05  -.6464837E-05  -.7284255E-05  -.8248145E-05
  -.7860803E-05  -.3891593E-05   .1862612E-05   .5690339E-06  -.1338913E-04
  -.2593868E-04  -.2962925E-04  -.2592256E-04  -.2169316E-04  -.1144578E-04
   .7546240E-05   .2548354E-04   .2299508E-04   .1901114E-05  -.1559003E-04
  -.1829898E-04  -.1263582E-04  -.8652518E-05  -.1081712E-04  -.1984905E-04
  -.2307023E-04  -.7332020E-05   .2028335E-04   .3500572E-04   .2673794E-04
   .7168787E-05  -.3194941E-05  -.3990960E-05  -.4103389E-05   .3402124E-06
   .1014683E-04   .1626588E-04   .1046843E-04   .4259798E-05   .4369956E-05
  -.3738576E-05  -.1687008E-04  -.1906866E-04  -.5014402E-05   .1492140E-04
   .3246824E-04   .3866495E-04   .1718449E-04  -.1427731E-04  -.2336023E-04
   .1783988E-05   .3610209E-04   .4337901E-04   .1474215E-04  -.2974699E-04
  -.4731496E-04  -.2382674E-04  -.2107042E-06  -.1299972E-04  -.3497401E-04
  -.3534406E-04  -.2238422E-04   .1137528E-05   .2107752E-04   .1884902E-04
   .6149410E-05  -.4338302E-05  -.6682994E-05   .4253788E-05   .6762567E-05
   .1403299E-05   .4513014E-05   .1422045E-04   .2060644E-04   .2019343E-04
   .1561787E-04   .4760306E-05  -.4819483E-05   .4744647E-05   .2461526E-04
   .3808954E-04   .3221467E-04   .2500041E-05  -.2503983E-04  -.2504482E-04
   .3614803E-05   .3209130E-04   .4224647E-04   .3259974E-04   .1275131E-04
   .7084121E-05   .8138639E-05   .3584965E-05   .8631715E-05   .2124115E-04
   .2414645E-04   .7833191E-05  -.2006991E-04  -.3234593E-04  -.1698199E-04
   .2551890E-05   .1148552E-04   .1424481E-04   .1582681E-04   .1718064E-04
   .1763678E-04   .1549430E-04   .5222539E-05  -.9303505E-05  -.1786955E-04
  -.1796486E-04  -.1280374E-04  -.1366602E-05   .1438728E-04   .3028215E-04
   .3317944E-04   .1240055E-04  -.1865181E-04  -.2696284E-04  -.1210229E-04
   .6733743E-05   .1800592E-04   .1986475E-04   .1767868E-04   .1624795E-04
   .1475298E-04   .5368069E-05  -.9319617E-05  -.1858328E-04  -.1899169E-04
  -.1370062E-04  -.1589672E-05   .1099249E-04   .8589217E-05  -.4623371E-05
  -.8490252E-05  -.3261867E-05   .3269236E-05   .3588474E-05   .5578040E-05
   .2243780E-04   .4328004E-04   .4297157E-04   .1574168E-04  -.1232152E-04
  -.1518604E-04  -.5601651E-05  -.2771858E-05  -.2327356E-05   .3405035E-06
   .1147286E-04   .1488694E-04   .1996538E-05  -.2449337E-05   .1186795E-04
   .1272484E-04   .1077899E-05  -.6010730E-06  -.4080699E-05  -.2618891E-04
  -.3658645E-04  -.2299026E-04  -.6982763E-05   .4391710E-05   .1343881E-04
   .1484985E-04   .2115530E-06  -.2629280E-06   .2323347E-04   .2794448E-04
  -.2595720E-05  -.2313365E-04  -.1006021E-04   .5004683E-05   .5562806E-05
   .2140667E-04   .4710739E-04   .4073953E-04   .1813615E-05  -.3872764E-04
  -.5665483E-04  -.4097655E-04  -.2977452E-06   .2228834E-04   .7676323E-05
  -.1332173E-04  -.7120192E-06   .3309336E-04   .3952978E-04   .1520537E-04
  -.2067485E-04  -.4751735E-04  -.4234027E-04  -.4554309E-05   .2294024E-04
   .2216826E-04   .1356390E-04   .1052658E-04   .2080102E-05  -.2040038E-04
  -.3614980E-04  -.3150609E-04  -.1837902E-04  -.1204147E-04  -.1209395E-04
  -.4459812E-05   .9332886E-05   .9222159E-05  -.4249862E-05  -.6932799E-05
   .7431598E-05   .1979814E-04   .1390789E-04   .2129603E-05  -.6198605E-05
  -.1315643E-04  -.1336654E-04   .6336264E-05   .2762353E-04   .1818735E-04
  -.1618691E-04  -.2851634E-04  -.7289867E-05   .1353102E-04   .2141247E-04
   .4943603E-05  -.2146216E-04  -.3139221E-04  -.2218403E-04  -.1247486E-05
   .1532281E-04   .1524617E-04   .1519873E-04   .9877185E-05  -.1455888E-04
  -.3552893E-04  -.3394070E-04  -.2050693E-04  -.1015618E-04  -.4064783E-05
  -.1257134E-04  -.2427501E-04  -.1663330E-04  -.3610713E-05  -.2006831E-05
  -.4222168E-06   .1277955E-04   .3159286E-04   .3093561E-04   .1322980E-04
  -.3059237E-05  -.2645702E-05   .1176608E-04   .2606587E-04   .3753943E-04
   .4151900E-04   .3934131E-04   .2697308E-04   .2155816E-04   .1939630E-04
  -.1119959E-04  -.4494983E-04  -.4596593E-04  -.2778992E-04  -.2341104E-04
  -.3013575E-04  -.2741929E-04  -.7035405E-05   .1472392E-04   .1577355E-04
   .2952645E-05  -.1783724E-04  -.3277912E-04  -.2791398E-04  -.1015567E-04
  -.4129636E-05   .1903731E-05   .7069630E-05  -.2177096E-05  -.1184129E-04
   .1572812E-05   .1511160E-04   .6712603E-05  -.3852061E-05  -.7826801E-05
  -.1460390E-04  -.2302814E-04   .1563922E-05   .3752313E-04   .2898339E-04
  -.2751806E-04  -.6396301E-04  -.4001717E-04  -.1186112E-05   .6146451E-05
  -.1105191E-04  -.2759869E-04  -.3526018E-04  -.2666824E-04  -.2064256E-04
  -.2195616E-04  -.1033229E-04   .1266464E-04   .2866922E-04   .2732349E-04
   .8533378E-05  -.1164091E-04  -.6677162E-05   .2239153E-04   .3181922E-04
   .9132352E-05  -.6487647E-05   .1924202E-05   .7914496E-05  -.3754484E-05
  -.1967472E-04  -.2038482E-04   .7088752E-05   .3676048E-04   .3887368E-04
   .1259668E-04  -.1446684E-04  -.1273804E-04   .1113132E-04   .2696709E-04
   .1735261E-04   .6721354E-05   .2140088E-04   .3793771E-04   .2370666E-04
  -.4318670E-05   .1914466E-05   .3964610E-04   .5379593E-04   .1401312E-04
  -.3241444E-04  -.3046237E-04   .4285541E-05   .1580510E-04  -.1683122E-04
  -.5728645E-04  -.5915162E-04  -.1919716E-04   .2307420E-04   .3746526E-04
   .2692248E-04   .3789619E-05  -.1722658E-04  -.2299447E-04  -.7213645E-05
   .1433626E-04   .1348016E-04  -.2661260E-05   .4487598E-05   .2600164E-04
   .2488431E-04   .1092708E-04   .3534496E-05  -.1138049E-04  -.3239809E-04
  -.4484077E-04  -.3159221E-04  -.9552084E-05  -.2447579E-05   .1213709E-05
   .1250859E-04   .2432185E-04   .2829828E-04   .2299606E-04   .8671059E-05
  -.7569266E-06  -.2982877E-05   .3558409E-05   .1355037E-04   .1420639E-04
   .1799399E-04   .1592776E-04  -.2701343E-05  -.1932333E-04  -.1703225E-04
  -.1527924E-04  -.8578582E-05   .1999815E-04   .4446215E-04   .4016180E-04
   .7632357E-05  -.3668332E-04  -.6308244E-04  -.4232033E-04   .2845000E-05
   .2214297E-04   .1344245E-04  -.7417747E-05  -.3070090E-04  -.3329834E-04
  -.2899117E-04  -.2369053E-04  -.1815129E-05   .6667850E-05   .1312306E-05
   .3456702E-05   .5541959E-05   .8214649E-05   .1348270E-04   .7522263E-05
  -.1051510E-04  -.2469818E-04  -.2706326E-04  -.1980077E-04  -.4700283E-05
  -.9907995E-06  -.2296323E-04  -.4024507E-04  -.2197109E-04   .1504901E-04
   .3388224E-04   .1720624E-04  -.8433513E-05  -.1338672E-05   .1441410E-04
   .7947016E-05  -.1626823E-06   .8702953E-05   .2696004E-04   .4592063E-04
   .4721962E-04   .1965553E-04  -.1600257E-04  -.2712301E-04   .3287993E-06
   .2503960E-04   .2516513E-04   .1578721E-04   .4021481E-05   .2319282E-05
   .1395979E-04   .2343789E-04   .1199383E-04  -.1285000E-04  -.2889933E-04
  -.2926649E-04  -.2011540E-04  -.4756698E-05   .1047330E-05  -.9822576E-05
  -.2027106E-04  -.1538985E-04  -.1488633E-04  -.9442260E-05   .2337967E-04
   .6515370E-04   .8012196E-04   .4626258E-04  -.7816739E-05  -.3805070E-04
  -.2995027E-04   .7776007E-05   .2693614E-04   .8778512E-05  -.6391660E-05
   .4659555E-05   .2496719E-04   .3030614E-04   .1382548E-04   .6812821E-06
   .1161492E-04   .3364119E-04   .2262495E-04  -.3239133E-05  -.6044135E-05
   .1769455E-05   .9457316E-05   .1793994E-04   .2173068E-04   .1133377E-04
   .3041887E-05   .1037806E-04   .2366607E-04   .2655972E-04   .1188198E-04
  -.4562117E-05  -.2725108E-04  -.5492927E-04  -.6028784E-04  -.4073307E-04
  -.2052835E-04  -.1612236E-04  -.1880791E-04  -.1386675E-04  -.1891857E-04
  -.3293495E-04  -.3355903E-04  -.1036301E-04   .1696783E-04   .1882329E-04
   .9124986E-05   .8293456E-05   .3965043E-05  -.8562500E-05  -.1016737E-04
  -.6883856E-05  -.9157656E-05  -.6756214E-05   .9140680E-06   .2148213E-04
   .3819065E-04   .2266938E-04  -.1213576E-04  -.3125438E-04  -.1504388E-04
   .1712299E-04   .3527681E-04   .3349534E-04   .2240983E-04   .3327406E-05
  -.1495012E-04  -.1050018E-04   .7037172E-05  -.6264067E-05  -.4786773E-04
  -.6046792E-04  -.1269052E-04   .4380230E-04   .5360572E-04   .1425592E-04
  -.4009267E-04  -.5880210E-04  -.2904003E-04   .4795759E-05   .1520168E-04
   .5151168E-05   .3032493E-05   .2856211E-04   .4507593E-04   .1162693E-04
  -.3725083E-04  -.4860322E-04  -.1927631E-04   .4893802E-05  -.3112286E-05
  -.2050040E-04  -.1713702E-04  -.2540146E-05   .4308768E-05  -.1137259E-04
  -.1668939E-04   .1062386E-04   .1851757E-04   .1117310E-05  -.1302363E-04
  -.4940806E-05   .1465334E-04   .1344791E-04  -.7003828E-05  -.1088234E-04
   .6828356E-05   .1162496E-04  -.7439862E-05  -.2807992E-04  -.3070370E-04
  -.5372694E-05   .3405686E-04   .4286950E-04   .2061606E-04  -.7475397E-05
  -.2192324E-04  -.1593100E-04  -.1273875E-04  -.6868268E-06   .1255657E-04
   .2031887E-04   .3736902E-04   .4647435E-04   .2045414E-04  -.3466796E-04
  -.7733378E-04  -.7357670E-04  -.3671429E-04   .3834442E-05   .2902378E-04
   .2784847E-04  -.3975611E-05  -.2302326E-04  -.6485272E-05   .1083575E-04
   .9529423E-05  -.2048245E-04  -.5689478E-04  -.5172072E-04  -.1658225E-04
   .1479378E-04   .2650265E-04   .1109134E-04  -.1611220E-04  -.3207952E-04
  -.3139593E-04  -.2493785E-04  -.1901711E-04  -.3685021E-05   .1594752E-04
   .1359316E-04  -.6870069E-05  -.1314221E-04  -.8482838E-05  -.8727284E-05
  -.1936870E-05   .1313283E-04   .1162958E-04  -.6823678E-05  -.6323999E-05
   .3173668E-04   .7101227E-04   .5993534E-04   .2103370E-04   .8154468E-05
   .3382005E-04   .5685396E-04   .4971661E-04   .2941550E-04   .1951474E-04
   .1959428E-04   .1172809E-04   .2179795E-05  -.7043301E-05  -.1863585E-04
  -.3082612E-04  -.4693069E-04  -.5283823E-04  -.3766780E-04  -.5788166E-05
   .2775903E-04   .5044101E-04   .3752854E-04  -.5313329E-06  -.1815356E-04
  -.1102048E-04   .3398189E-06  -.1707315E-04  -.5643071E-04  -.6704566E-04
  -.2788009E-04   .2005302E-04   .2490133E-04  -.7407390E-05  -.3212740E-04
  -.1455955E-04   .3152435E-04   .4422326E-04   .9568254E-06  -.6363060E-04
  -.7610949E-04  -.3331536E-04   .7606567E-05  -.1305990E-05  -.3598551E-04
  -.4819809E-04  -.3552858E-04  -.2102508E-04  -.1919442E-04  -.2103842E-04
  -.1053621E-04   .1471817E-05   .1072436E-04   .1866425E-04   .9890757E-05
  -.1288396E-04  -.3325371E-04  -.5291587E-04  -.6646421E-04  -.4303915E-04
   .4068914E-05   .2455548E-04   .1948154E-04   .7605569E-05  -.3053847E-04
  -.6109141E-04  -.4061079E-04  -.5039714E-05   .4112068E-05   .3741076E-05
   .1181730E-04   .9845247E-05  -.6196760E-05  -.6608963E-05   .7942628E-05
   .2855303E-05   .5948831E-05   .1570563E-04  -.3270613E-04  -.1036375E-03
  -.1208952E-03  -.7685982E-04  -.2437162E-04  -.5369943E-05  -.1884639E-04
  -.3892638E-04  -.1965345E-04   .1205962E-04   .1009840E-04  -.1561365E-04
  -.2615864E-04   .4076074E-05   .3213405E-04   .2948354E-04   .4831916E-05
  -.2068199E-04  -.2716886E-04  -.9401765E-05   .3837244E-05   .9983640E-06
   .1604589E-04   .4273074E-04   .5164306E-04   .3439289E-04  -.6087949E-05
  -.2761463E-04  -.2092899E-04  -.3476098E-05   .4336386E-04   .8953491E-04
   .7548208E-04   .2414912E-04  -.1206265E-04  -.7898571E-05   .2070493E-04
   .3684000E-04   .2242862E-04   .3046545E-05  -.1179522E-04  -.3213109E-04
  -.3281571E-04  -.1669204E-04  -.1056380E-04  -.1505473E-04  -.6017151E-05
   .1873626E-04   .3769464E-04   .4023636E-04   .3062187E-04   .8106361E-05
  -.1405234E-04  -.1652882E-04  -.1900274E-04  -.1744287E-04  -.1545097E-04
  -.2894151E-04  -.3392557E-04  -.3501194E-04  -.3803045E-04  -.3107169E-04
  -.8684540E-05   .4430835E-05  -.3158722E-05  -.2907008E-05   .1632075E-04
   .3603548E-04   .4091959E-04   .3594321E-04   .2394500E-04  -.2389747E-05
  -.5613496E-05   .6621662E-05   .7420761E-05   .2015452E-04   .4919191E-04
   .8208835E-04   .7115581E-04   .1314665E-04  -.3623857E-04  -.4580217E-04
  -.2760295E-04   .1847010E-05   .2757552E-04   .3811881E-04   .3602942E-04
   .3124651E-04   .2968063E-04   .3138091E-04   .2556854E-04  -.4144115E-05
  -.2878339E-04  -.3771417E-04  -.2265699E-04   .1159661E-04   .4082235E-04
   .5974371E-04   .6392036E-04   .5928194E-04   .3428503E-04  -.1053671E-04
  -.5358346E-04  -.6867529E-04  -.6378256E-04  -.4701698E-04  -.1584140E-04
   .2440483E-05  -.3641029E-05  -.7329974E-05  -.1051716E-04  -.2933615E-04
  -.3340880E-04  -.2284408E-04  -.3127230E-04  -.4330671E-04  -.1939684E-04
   .3706682E-04   .6777209E-04   .4133560E-04   .5459208E-05   .1142075E-04
   .6357006E-04   .8787516E-04   .3753568E-04  -.4249014E-05   .6832235E-05
   .1469856E-04  -.2005780E-04  -.5269201E-04  -.3677277E-04  -.1998447E-05
   .1640801E-04   .9995640E-05   .3970702E-05   .1222609E-04   .9788838E-05
  -.7613832E-05  -.1222106E-04  -.8279332E-05  -.1009190E-04  -.6104180E-05
  -.7558068E-05  -.3248525E-04  -.5415244E-04  -.4512697E-04  -.7852622E-05
   .2626804E-04   .1818313E-04  -.2979532E-04  -.5959972E-04  -.3167166E-04
   .2113261E-04   .4945019E-04   .4158298E-04   .8712908E-05  -.1641939E-04
   .1426520E-05   .2278189E-04   .7312409E-05  -.2028010E-04  -.2077146E-04
  -.1320484E-06   .2820137E-04   .3877400E-04   .3808845E-04   .2339290E-04
  -.3556056E-05  -.1291745E-04   .4932652E-06   .4912777E-04   .9488042E-04
   .7290285E-04   .2330159E-05  -.4344490E-04  -.3026667E-04  -.5867039E-05
  -.2555215E-04  -.6922790E-04  -.8334393E-04  -.6643109E-04  -.1960335E-04
   .5218570E-04   .7471453E-04   .2467529E-04  -.3015025E-04  -.3253220E-04
  -.5053739E-05   .7098647E-05  -.3050708E-04  -.7198666E-04  -.6652350E-04
  -.3146616E-04   .1086096E-04   .4348381E-04   .3177059E-04   .1505966E-04
   .2573078E-04   .4066770E-04   .4220907E-04   .3087675E-04   .6389629E-05
  -.1334437E-04  -.1490239E-06   .9556312E-05   .2223746E-04   .5440682E-04
   .7073903E-04   .5470466E-04   .3051456E-04   .2137458E-04   .3008737E-04
   .5198627E-04   .5815206E-04   .2540370E-04  -.1699253E-04  -.2463564E-04
  -.1180705E-04  -.1167682E-04  -.2438051E-04  -.3436467E-04  -.3067719E-04
  -.1077882E-04   .2744320E-06  -.8239696E-05  -.7119059E-05   .1029565E-04
   .1178468E-04  -.7448504E-05  -.1431640E-04  -.1088271E-04  -.1186610E-04
  -.4237619E-05   .2036870E-04   .5001124E-04   .3990534E-04  -.1967470E-04
  -.6266330E-04  -.3569275E-04   .3569131E-04   .8008908E-04   .7716353E-04
   .3167144E-04  -.3539185E-04  -.6659289E-04  -.4146857E-04  -.2043891E-04
  -.2986387E-04  -.3418692E-04  -.8342943E-06   .2594957E-04   .7997367E-05
  -.2685101E-04  -.4316654E-04  -.3375970E-04  -.4671672E-05   .2215734E-04
   .1669821E-04  -.1387203E-04  -.3323728E-04  -.2326073E-04  -.2152079E-04
  -.3654155E-04  -.4003654E-04  -.1034188E-04   .4238031E-04   .6700683E-04
   .3056275E-04  -.3832786E-04  -.7752081E-04  -.7311376E-04  -.3239445E-04
   .1055945E-04   .2254575E-05  -.3604476E-04  -.4890275E-04  -.1754513E-04
   .2278089E-04   .2363630E-04  -.6120626E-05  -.1444452E-04   .7080673E-05
   .1474244E-04  -.6821396E-05  -.3174757E-04  -.3504337E-04  -.1267049E-04
   .5721464E-05   .2104747E-04   .5737579E-04   .6452651E-04   .2528088E-04
   .8635773E-05   .2621189E-04   .2496253E-04  -.3010844E-05  -.1689380E-04
  -.9724253E-05   .4402106E-06  -.1579585E-04  -.4325220E-04  -.4561548E-04
  -.1308097E-04   .1945465E-04   .6060841E-05  -.2320041E-04  -.4510932E-04
  -.4400136E-04   .1416083E-05   .4736030E-04   .3811580E-04  -.9161870E-05
  -.4247101E-04  -.3929569E-04  -.9991612E-05   .5578801E-05  -.4535922E-05
  -.1344015E-04  -.2800398E-04  -.3611281E-04  -.1223409E-05   .4633279E-04
   .5990219E-04   .3973972E-04   .3898402E-05  -.2555230E-04  -.3950962E-04
  -.5134162E-04  -.5469637E-04  -.4261611E-04  -.2438870E-04   .3729199E-06
   .2182002E-04   .1938731E-04   .1005229E-04   .1616289E-04   .2718854E-04
   .1237047E-04  -.3318597E-04  -.5985972E-04  -.2794991E-04   .4408017E-04
   .8963910E-04   .4837041E-04  -.3008342E-04  -.6418215E-04  -.4371911E-04
  -.3152362E-05   .1474797E-04   .1424549E-04   .1921749E-04   .2293587E-04
  -.4975548E-05  -.4256312E-04  -.5154402E-04  -.3647572E-04  -.2221250E-04
  -.2155199E-04  -.1985201E-04   .8001599E-05   .3051820E-04   .2576155E-04
   .5098033E-05   .2523065E-05   .3530040E-04   .6372741E-04   .5053887E-04
   .7786697E-06  -.1294109E-04   .1776289E-04   .3098315E-04   .2057600E-04
   .1621848E-04   .2519726E-04   .3480038E-04   .3632451E-04   .3296107E-04
   .2672763E-04   .1137434E-04   .2527370E-06  -.7459756E-05  -.1551439E-04
  -.1064134E-04  -.1663837E-05   .5060334E-05  -.2644807E-06  -.1430729E-04
  -.9560317E-05   .1243545E-04   .1070007E-04  -.2588436E-04  -.4298411E-04
  -.2441247E-04   .7400946E-05   .3122152E-04   .3760995E-04   .3400785E-04
   .2626579E-04   .1067733E-04  -.3272707E-06  -.3898056E-05   .1666386E-07
  -.1964819E-05  -.1311180E-04  -.1203458E-04  -.6926026E-05  -.1824984E-04
  -.3993228E-04  -.2079917E-04   .2940647E-04   .4851478E-04   .5204582E-05
  -.4961921E-04  -.5724998E-04  -.2008879E-04   .7132041E-05  -.3690138E-05
  -.3185041E-04  -.5810913E-04  -.6209727E-04  -.4012304E-04  -.6339060E-05
   .9996823E-05   .1658246E-04   .3574747E-04   .3614855E-04  -.1053346E-05
  -.5152845E-04  -.6677546E-04  -.3105316E-04  -.1763030E-06  -.2338693E-04
  -.6813498E-04  -.5970207E-04  -.4164489E-05   .2816873E-04   .2172970E-04
  -.2909467E-05  -.2141646E-04  -.1047502E-04   .2020649E-04   .3393176E-04
   .1692448E-06  -.4490651E-04  -.4800372E-04   .8250512E-05   .7662299E-04
   .9187901E-04   .5409505E-04   .1123071E-05  -.2861602E-04  -.2211967E-04
  -.2439546E-04  -.5854435E-04  -.8584814E-04  -.6088507E-04  -.1129038E-04
   .2210012E-04   .3444994E-04   .2717459E-04  -.5623310E-05  -.2692252E-04
  -.2302642E-04  -.1362889E-04  -.2057539E-05   .7048372E-05   .2432419E-04
   .3438565E-04   .3875439E-04   .2659401E-04  -.2118411E-05  -.9445571E-05
   .8937944E-05   .1754245E-04   .1457575E-04   .1929897E-04   .2272475E-04
  -.1842590E-05  -.2016297E-04  -.4713814E-05   .1172323E-04   .1665066E-04
   .2608125E-04   .4222935E-04   .2482423E-04  -.8174947E-05  -.2016605E-04
  -.7275595E-05   .5922082E-05   .1606004E-05  -.3884841E-04  -.7489372E-04
  -.6188126E-04  -.7602478E-05   .5374201E-04   .7216243E-04   .3249824E-04
  -.1815881E-04  -.2681532E-04  -.3828748E-05   .3288075E-04   .5632111E-04
   .4763282E-04   .1146831E-04  -.2139478E-04  -.2041617E-04   .1650286E-06
   .3165283E-04   .4985369E-04   .3074309E-04  -.2320956E-06  -.3611861E-04
  -.6643988E-04  -.5433943E-04  -.1612305E-04   .1603950E-04   .2853635E-04
   .1223345E-04  -.1802450E-04  -.3280142E-04  -.1691921E-04  -.8020649E-06
  -.5125825E-05  -.4011011E-05   .8034038E-05  -.6927289E-05  -.3502155E-04
  -.2317173E-04   .2872159E-04   .4495445E-04  -.7582136E-05  -.6116378E-04
  -.6367856E-04  -.3148202E-04  -.1223214E-05  -.7054203E-05  -.1752563E-04
   .1696313E-05   .2764065E-04   .2187451E-04  -.1490538E-04  -.5220052E-04
  -.4379206E-04  -.2397306E-05   .5328385E-05  -.6903701E-05   .2058437E-05
   .3074645E-04   .5419938E-04   .2651597E-04  -.2919328E-04  -.5436295E-04
  -.4628953E-04  -.4291335E-04  -.4728112E-04  -.3826566E-04  -.1107917E-04
   .8381184E-05   .1556740E-04   .2017259E-04   .9717811E-05  -.1044134E-04
  -.9326530E-05   .1623783E-04   .3555185E-04   .1684451E-04  -.3050519E-04
  -.4260805E-04  -.2794108E-05   .3291864E-04   .1267730E-04  -.1657488E-04
  -.1228641E-04  -.9707269E-05  -.1973532E-04  -.5555234E-04  -.9351210E-04
  -.9010810E-04  -.6503396E-04  -.3948520E-04  -.1101540E-04   .1022314E-04
   .3412579E-04   .4978181E-04   .2891718E-04  -.8596360E-05  -.1497368E-04
   .1392213E-04   .3769102E-04   .2388045E-04  -.1674929E-04  -.5235757E-04
  -.4151055E-04   .3887836E-05   .2665368E-04   .1550682E-04  -.2096444E-04
  -.4952820E-04  -.4341667E-04  -.9669652E-05   .5705923E-05  -.1950298E-04
  -.3512997E-04  -.1985183E-04   .6372484E-05   .1138057E-04  -.5418601E-05
  -.6780291E-05   .2030329E-04   .5558472E-04   .4691593E-04  -.1481042E-04
  -.5948489E-04  -.3606863E-04   .2461742E-04   .7283631E-04   .7726798E-04
   .5401375E-04   .4698269E-04   .5333869E-04   .4654180E-04   .1533803E-04
  -.1716993E-04  -.1793884E-04  -.5729293E-05  -.5124494E-05  -.3659504E-05
  -.7367195E-05  -.3313530E-04  -.5393009E-04  -.5123405E-04  -.4460424E-04
  -.2090957E-04   .3117222E-04   .6842468E-04   .5547862E-04  -.6506612E-06
  -.3130891E-04  -.8838460E-05   .1303396E-04   .2592646E-06  -.2201277E-04
  -.1774124E-04  -.3670332E-05  -.7402819E-05  -.1894963E-04  -.1266999E-04
  -.2427458E-05  -.8606764E-05  -.2697615E-04  -.5045891E-04  -.5756051E-04
  -.3842897E-04  -.4470599E-05   .6592777E-05  -.2820281E-04  -.7063757E-04
  -.5259859E-04   .2413647E-04   .7907807E-04   .6860583E-04   .1584613E-04
  -.2183484E-04   .1828516E-05   .4542299E-04   .3742374E-04  -.2305095E-04
  -.6611834E-04  -.5715882E-04  -.2345337E-04   .6314985E-05   .9977025E-05
  -.1376155E-04  -.4461276E-04  -.3448321E-04   .2618223E-04   .7267521E-04
   .7178818E-04   .5180228E-04   .6912523E-05  -.4894858E-04  -.5587901E-04
  -.2337091E-04  -.7801965E-05  -.2777861E-04  -.3607638E-04  -.1696948E-04
   .1194460E-04   .3783118E-04   .6047839E-04   .6314938E-04   .2860766E-04
  -.9248455E-05  -.3914459E-05   .2365614E-05  -.1829943E-04  -.3338731E-04
  -.1768898E-04   .1809505E-05  -.7339496E-05  -.3773421E-04  -.3434068E-04
   .2655958E-04   .8678704E-04   .7411078E-04   .6881920E-05  -.4648226E-04
  -.6500592E-04  -.6212321E-04  -.7501644E-04  -.9847180E-04  -.9684427E-04
  -.4332537E-04   .3953093E-04   .7974512E-04   .4915096E-04   .8014673E-05
   .3055952E-05   .8110493E-05  -.7696243E-05  -.4238414E-04  -.5636857E-04
  -.1888980E-04   .4327961E-04   .5837808E-04   .7005239E-05  -.6680511E-04
  -.7639014E-04  -.1259371E-04   .4909601E-04   .5889028E-04   .2134082E-04
  -.2135168E-04  -.3718059E-04  -.3370534E-04  -.3992481E-04  -.4374851E-04
  -.1721150E-04   .2569315E-04   .3923419E-04  -.1289331E-04  -.6592833E-04
  -.4576331E-04   .1476307E-04   .3219035E-04  -.1396772E-04  -.6142458E-04
  -.7362506E-04  -.5513811E-04  -.2132119E-04   .2646266E-04   .5804639E-04
   .3858358E-04  -.4097229E-05  -.1709475E-04  -.3027332E-05   .1373283E-04
   .1132619E-04  -.9432735E-05  -.2669286E-04  -.2604633E-04  -.1193614E-05
   .2721099E-04   .2447874E-04  -.5303482E-05  -.2966430E-04  -.2556570E-04
   .1772953E-04   .5653496E-04   .4209774E-04  -.5444867E-05  -.3651085E-04
  -.3573260E-04  -.2257089E-04  -.1304625E-04   .3369153E-05   .2363090E-04
   .2420218E-04   .1704533E-04   .1947540E-04   .1007302E-04  -.2623003E-04
  -.5017442E-04  -.2066731E-04   .4847363E-04   .9764388E-04   .6962447E-04
  -.1534018E-04  -.6231491E-04  -.2055427E-04   .3939452E-04   .6384455E-04
   .4148852E-04  -.8414055E-05  -.4910805E-04  -.4325991E-04  -.8619934E-05
   .1786725E-04   .1480729E-04  -.1004504E-04  -.2487260E-04  -.1433071E-04
  -.1797228E-04  -.4613033E-04  -.4599865E-04  -.1482714E-04   .1948734E-04
   .3907773E-04   .4708853E-04   .4826760E-04   .8025401E-05  -.3665070E-04
  -.5329714E-04  -.4647460E-04  -.2906490E-04  -.1821847E-04  -.1775094E-04
  -.1793078E-04  -.7467111E-05  -.1372733E-04  -.2521715E-04   .6624619E-06
   .2821880E-04   .1546808E-04  -.1315318E-04  -.1104174E-04   .1789959E-04
   .2480374E-04   .6959386E-05   .1206212E-04   .2013834E-04  -.9675607E-05
  -.5251433E-04  -.8635602E-04  -.8051195E-04  -.2442419E-04   .2918462E-04
   .1795825E-04  -.2478781E-04  -.2220966E-04   .4268399E-04   .1109591E-03
   .8309110E-04  -.2150247E-04  -.8091735E-04  -.4255569E-04   .3086841E-04
   .6904753E-04   .7453980E-04   .5678043E-04   .2438238E-05  -.6064814E-04
  -.7313436E-04  -.2358192E-04   .3666885E-04   .5271881E-04   .8384848E-05
  -.4646956E-04  -.6684573E-04  -.3484406E-04   .1762015E-04   .3513183E-04
   .2177086E-04   .4053866E-05   .2241066E-05   .7568949E-05   .1262489E-04
   .1085051E-04   .1308314E-04   .2334795E-04   .2169185E-04   .1375933E-04
  -.1286398E-05  -.2819741E-04  -.2855199E-04   .8696273E-05   .4160900E-04
   .3168811E-04  -.6390863E-05  -.3179802E-04  -.3568651E-04  -.3713679E-04
  -.2524937E-04  -.7253638E-05  -.4945104E-05  -.1566670E-04  -.2074751E-04
  -.5547845E-05   .1071703E-04   .1383395E-04  -.1375624E-04  -.5737634E-04
  -.6552027E-04  -.1678670E-04   .5486160E-04   .8356707E-04   .4193558E-04
  -.3575789E-04  -.7956426E-04  -.3862494E-04   .2522912E-04   .4574082E-04
   .1982469E-04  -.1288450E-04  -.1256527E-04   .4974345E-05   .2125435E-04
   .4102426E-04   .8340317E-04   .1105906E-03   .6784057E-04   .1612402E-04
  -.1978777E-05  -.7372978E-05  -.1517255E-04  -.1922146E-04  -.5475817E-05
   .8712202E-05   .2592702E-04   .6855064E-04   .9237622E-04   .5035683E-04
  -.2871313E-04  -.6677697E-04  -.3051474E-04   .3060471E-04   .5617583E-04
   .2908763E-04  -.1113478E-04  -.1334734E-04   .2301896E-04   .6640767E-04
   .7506969E-04   .3485612E-04  -.1627766E-04  -.3526265E-04  -.9427277E-05
   .2706801E-04   .3130625E-04   .1850478E-04   .1985242E-04   .3339107E-04
   .4306566E-04   .3899348E-04   .1522894E-04  -.1147485E-04  -.1148857E-04
  -.5169530E-05  -.1832794E-04  -.2841420E-05   .4889171E-04   .6596519E-04
   .3699410E-04  -.2887445E-05  -.1981468E-04   .1541309E-04   .6966822E-04
   .7215907E-04   .2757551E-04  -.3125844E-04  -.7799848E-04  -.8519735E-04
  -.1978542E-04   .8091268E-04   .1077592E-03   .5424360E-04  -.9153609E-05
  -.3339964E-04  -.1326070E-04   .6445169E-05  -.1938345E-05  -.2620953E-04
  -.4785019E-04  -.3739840E-04  -.1134928E-04  -.6937729E-06   .2835026E-05
   .3667415E-05   .7273048E-05   .5898963E-06  -.3338496E-04  -.7565954E-04
  -.8939561E-04  -.4745580E-04   .1176376E-04   .1078356E-04  -.4414535E-04
  -.7111224E-04  -.3094172E-04   .3110044E-04   .5586223E-04   .3212470E-04
   .3742662E-05  -.4774032E-05   .7970555E-05   .3025735E-04   .3977304E-04
   .2415990E-04   .1022152E-04   .1550470E-04   .1406792E-04  -.5614636E-05
  -.2568427E-04  -.2751826E-04  -.3051814E-05   .2659919E-04   .2427370E-04
  -.1994475E-05  -.1123504E-04   .1776254E-05   .3380469E-04   .5953668E-04
   .5412502E-04   .1500995E-04  -.3480927E-04  -.4335495E-04  -.1509022E-04
   .1798840E-04   .3429506E-04   .1943210E-04  -.1198756E-04  -.2777311E-04
  -.1220976E-04   .8070504E-05   .1629526E-04   .6726758E-05  -.9974515E-05
  -.8251317E-05  -.3646267E-06  -.1046945E-04  -.3639281E-04  -.3711171E-04
  -.1519784E-04  -.5685822E-05  -.1061500E-04  -.6341321E-05   .3889101E-05
   .1197032E-04   .1060520E-04   .1175633E-04   .2131130E-04   .1976603E-04
   .1516112E-04   .2993427E-04   .7784863E-04   .1174119E-03   .1022147E-03
   .5014262E-04   .3252149E-05  -.5139369E-05   .2293031E-04   .5758142E-04
   .5446195E-04   .2688205E-04   .1250837E-04   .7357137E-05   .1467359E-04
   .4355875E-04   .6436681E-04   .6022175E-04   .5262745E-04   .3608259E-04
   .2247804E-04   .3836695E-04   .5150733E-04   .1373965E-04  -.4051192E-04
  -.5307321E-04  -.1933739E-04   .8252529E-05  -.9564951E-06  -.2480300E-04
  -.3597525E-04  -.3137512E-04  -.2443512E-04  -.1908117E-04  -.6103516E-05
   .4720522E-05   .9067139E-05   .9435524E-05   .2337816E-04   .2396821E-04
  -.1312807E-04  -.3210142E-04  -.7089659E-05   .1726636E-04   .2260638E-04
   .2517505E-04   .2741897E-04   .1738772E-04   .5454112E-05   .2518718E-05
   .2789559E-04   .7050687E-04   .7888617E-04   .3090951E-04  -.4075719E-04
  -.6950040E-04  -.3481683E-04   .4161539E-05   .6199173E-05   .7237132E-06
   .1433426E-04   .2684047E-04   .4045968E-05  -.2478578E-04  -.3936940E-04
  -.2477136E-04   .9466919E-05   .1866375E-04  -.5076113E-05  -.2776497E-04
  -.1083619E-04   .3284972E-04   .3760228E-04   .2057970E-04   .9883712E-05
   .1189073E-04   .2155042E-04   .1333548E-04  -.1234746E-04  -.3229627E-04
  -.3825299E-04  -.4751369E-04  -.4472704E-04  -.3152550E-05   .3243330E-04
   .3563498E-04   .2027097E-04  -.7567066E-05  -.7545278E-05   .1530160E-04
   .4378111E-04   .5454546E-04   .3405336E-04   .2192221E-04   .1981429E-04
   .1923735E-04   .2448805E-04   .2845306E-04   .1309603E-04  -.1206130E-04
  -.1522103E-04  -.7343652E-05  -.7922450E-05  -.1866392E-05   .1850246E-04
   .2931002E-04  -.1192876E-05  -.4320691E-04  -.4976574E-04  -.1395916E-04
   .2584465E-04   .2450799E-04  -.9470716E-05  -.3647917E-04  -.3532350E-04
  -.6152478E-05   .2431506E-04   .2055021E-04  -.1067725E-04  -.3189743E-04
  -.1118759E-04   .3404374E-04   .3399743E-04   .4798426E-06  -.2291543E-04
  -.2131749E-04   .1221712E-04   .2715858E-04  -.1192645E-04  -.5555214E-04
  -.5418448E-04  -.1129939E-04   .3304718E-04   .4433623E-04   .2442900E-04
   .2150605E-04   .3684030E-04   .3032781E-04   .1383271E-04   .1381293E-04
   .3509088E-04   .7593871E-04   .9699499E-04   .8197813E-04   .3939855E-04
   .1032384E-04   .2490115E-04   .3365164E-04   .9003741E-05  -.1144063E-04
  -.1578291E-04  -.1178566E-04   .9012890E-05   .2080607E-05  -.4164776E-04
  -.5155585E-04  -.7892641E-05   .3903020E-04   .4386797E-04  -.5123243E-06
  -.2964827E-04  -.1458900E-04  -.7013137E-05  -.1245064E-04  -.1357451E-04
   .2542574E-06   .1942951E-04   .1454358E-04  -.1645409E-04  -.5444597E-04
  -.6255824E-04  -.2839080E-04   .5793186E-05   .1946781E-04   .2519337E-04
   .2290699E-04  -.8286482E-05  -.4479035E-04  -.5183230E-04  -.3282142E-04
  -.1743597E-06   .2478859E-04   .1702790E-04  -.1059092E-04  -.9991363E-05
   .2523150E-04   .2406341E-04  -.8443920E-05   .7864953E-05   .4194556E-04
   .4125802E-04   .7431241E-05  -.2753432E-04  -.4318727E-04  -.5294914E-04
  -.5066017E-04  -.2266995E-04  -.3463502E-05  -.2512256E-04  -.5373835E-04
  -.4884144E-04  -.1724980E-04  -.1101249E-04  -.3632931E-04  -.6031573E-04
  -.4239545E-04   .5037065E-05   .2615156E-04   .2074618E-04   .1857924E-04
   .3110439E-04   .5532624E-04   .6208370E-04   .2491068E-04  -.3776941E-04
  -.6666298E-04  -.3192859E-04   .1744899E-04   .6367197E-05  -.4891493E-04
  -.6235855E-04  -.2616665E-04   .9453902E-05  -.6943647E-05  -.5480360E-04
  -.5952655E-04  -.2534210E-04  -.4745891E-05  -.1638298E-04  -.4770637E-04
  -.5783076E-04  -.2633225E-04   .4879934E-06  -.2278108E-04  -.6931623E-04
  -.7569065E-04  -.2920855E-04   .1014240E-04   .4605705E-05  -.1854928E-04
  -.1306029E-04   .1197973E-04   .5829064E-05  -.9476509E-05   .1184595E-06
   .9028207E-05  -.7685525E-05  -.4374701E-04  -.5732463E-04  -.2653254E-04
   .4777501E-05   .1631044E-05  -.2376797E-04  -.5218866E-04  -.5469389E-04
  -.2096231E-04   .7156781E-05   .4843371E-06  -.1756899E-04  -.1703532E-04
  -.1644845E-04  -.1781201E-04  -.2813768E-04  -.4040178E-04  -.3438322E-04
  -.3536166E-05   .2117941E-04  -.1300093E-04  -.6210967E-04  -.6117949E-04
  -.1108562E-04   .3918114E-04   .5514833E-04   .4138433E-04   .1455132E-04
   .4664295E-05   .2030797E-04   .3947682E-04   .4529388E-04   .4022086E-04
   .3523341E-04   .3471445E-04   .3698142E-04   .3109047E-04  -.7595951E-05
  -.6104757E-04  -.7565196E-04  -.5132371E-04  -.3657760E-04  -.3882079E-04
  -.3648164E-04  -.3064165E-04  -.3894262E-04  -.4411017E-04  -.1646861E-04
   .1982912E-04   .5620994E-05  -.4539148E-04  -.5526232E-04  -.1944725E-04
   .1780474E-04   .1985774E-04  -.3215413E-05  -.6157327E-05   .1906290E-04
   .4745510E-04   .6458686E-04   .4682300E-04   .1333615E-05  -.2811327E-04
  -.1705794E-04   .1359621E-04   .5640232E-04   .6163811E-04  -.1470790E-05
  -.7743317E-04  -.1087870E-03  -.9691036E-04  -.7847288E-04  -.6753038E-04
  -.3188780E-04   .3506464E-04   .7865539E-04   .6353096E-04  -.3327699E-05
  -.7339822E-04  -.9525915E-04  -.4861171E-04   .1879307E-04   .4088524E-04
   .2041544E-04  -.1998439E-04  -.4659456E-04  -.3722437E-04  -.7016956E-05
  -.4367306E-05  -.3083563E-04  -.6056006E-04  -.8003561E-04  -.7807571E-04
  -.3388179E-04   .4420103E-04   .1027455E-03   .9633849E-04   .3591306E-04
  -.2547313E-04  -.5513214E-04  -.3318658E-04   .1847265E-04   .5272869E-04
   .5469073E-04   .3491540E-04  -.6535119E-05  -.4136871E-04  -.3944995E-04
  -.3077238E-05   .4030140E-04   .7164543E-04   .7162314E-04   .3234481E-04
  -.1071322E-04  -.1238923E-04   .2109829E-04   .4509369E-04   .2920563E-04
  -.1240095E-04  -.5096311E-04  -.5880349E-04  -.3414060E-04   .9146829E-05
   .6438970E-04   .1149478E-03   .1138199E-03   .4221670E-04  -.5467471E-04
  -.7499108E-04   .6774805E-05   .9758245E-04   .1078589E-03   .4170597E-04
  -.2609889E-04  -.4259429E-04  -.8297158E-05   .3491884E-04   .5236067E-04
   .4598491E-04   .3246876E-04   .1456817E-04   .1282149E-04   .3853975E-04
   .4468574E-04   .1074294E-04  -.2664667E-04  -.3469492E-04   .1032033E-05
   .6958542E-04   .1049201E-03   .7526204E-04   .1385163E-04  -.2673504E-04
  -.1556899E-04   .2721197E-04   .6745432E-04   .7905291E-04   .6583758E-04
   .1826022E-04  -.2722323E-04  -.8198333E-05   .3653346E-04   .2022212E-04
  -.5059733E-04  -.9983604E-04  -.8860382E-04  -.5266214E-04  -.1758834E-04
   .3311603E-05   .1141599E-04   .5271895E-05  -.8918246E-05  -.3761612E-05
   .2175332E-04   .3922589E-04   .2341210E-04  -.1169537E-04  -.2955562E-04
  -.1709637E-04  -.1451146E-04  -.3411783E-04  -.5371819E-04  -.3635332E-04
   .1241878E-04   .4838152E-04   .5212191E-04   .4337506E-04   .4775042E-04
   .3936708E-04   .7298423E-06  -.4381250E-04  -.4198175E-04   .8958707E-05
   .6979423E-04   .9413663E-04   .4729106E-04  -.7788973E-05  -.1144556E-04
   .7794938E-05   .1839876E-04   .7782105E-05  -.1495589E-04  -.2960103E-04
  -.3020824E-04  -.2120350E-04   .7903958E-06   .2457988E-04   .1690626E-04
  -.2648683E-04  -.6538431E-04  -.8809600E-04  -.8503101E-04  -.6311091E-04
  -.2010393E-04   .3790746E-04   .4608758E-04  -.2715261E-04  -.1072837E-03
  -.1174826E-03  -.5095536E-04   .2578686E-04   .4056423E-04   .2593468E-05
  -.3588306E-04  -.5949987E-04  -.6787373E-04  -.3856534E-04   .1921836E-04
   .7065112E-04   .8186532E-04   .5426907E-04   .1116946E-04  -.2141949E-04
  -.3093514E-04  -.2207511E-04   .2798793E-05   .3137923E-04   .4223277E-04
   .2561811E-04   .7093765E-05  -.3223527E-05  -.1327423E-04  -.1810964E-04
  -.5694629E-05   .4254124E-05   .2188698E-05   .1745006E-04   .2434652E-04
  -.1069785E-04  -.4852700E-04  -.4956796E-04  -.3122904E-04  -.3560438E-04
  -.6514207E-04  -.8578856E-04  -.6276740E-04   .1219546E-04   .8387007E-04
   .7524207E-04  -.5827446E-05  -.5887522E-04  -.1441584E-04   .7699499E-04
   .1218081E-03   .7078625E-04  -.4408760E-04  -.1206688E-03  -.9468971E-04
   .1168808E-04   .1209337E-03   .1509975E-03   .8759045E-04   .6987984E-05
  -.3792701E-04  -.3533605E-04  -.2214211E-04  -.7362239E-05   .1480168E-04
   .1747640E-04   .3305408E-05   .1625622E-04   .4770455E-04   .6289543E-04
   .6724320E-04   .6261886E-04   .4902401E-04   .3667701E-04   .3337363E-04
   .3252696E-04   .1621800E-04  -.1515755E-04  -.5562163E-04  -.1037071E-03
  -.1347635E-03  -.1097115E-03  -.5164261E-04  -.2913958E-04  -.5491752E-04
  -.9049322E-04  -.1181063E-03  -.1261230E-03  -.7692816E-04   .3682594E-05
   .3815028E-04   .1244357E-04  -.3102734E-04  -.8020001E-04  -.1152772E-03
  -.8867397E-04  -.4615284E-04  -.6157285E-04  -.1182402E-03  -.1530725E-03
  -.1327371E-03  -.9506525E-04  -.1043411E-03  -.1476046E-03  -.1802767E-03
  -.1760591E-03  -.1549158E-03  -.1686800E-03  -.2073240E-03  -.2355335E-03
  -.2345330E-03  -.2304986E-03  -.2572932E-03  -.2999893E-03  -.3159565E-03
  -.2747547E-03  -.1995647E-03  -.1260573E-03  -.8677773E-04  -.8146429E-04
  -.8779587E-04  -.8020861E-04  -.8585892E-04  -.9110488E-04  -.4246042E-04
   .3245960E-04   .6309781E-04   .6291574E-04   .1082050E-03   .1873782E-03
   .2625783E-03   .3165033E-03   .3130130E-03   .2408829E-03   .1411322E-03
   .1021105E-03   .1479998E-03   .1825580E-03   .1392285E-03   .6818441E-04
   .4996094E-04   .9018351E-04   .1414227E-03   .1699674E-03   .2149316E-03
   .2695631E-03   .3131051E-03   .3429232E-03   .3588974E-03   .3732113E-03
   .3795780E-03   .3875840E-03   .4172163E-03   .4584816E-03   .4996967E-03
   .5461406E-03   .5986356E-03   .6415928E-03   .6678869E-03   .6643655E-03
   .6165783E-03   .5301798E-03   .4514473E-03   .4168782E-03   .4093784E-03
   .4111995E-03   .4009313E-03   .3670985E-03   .3353444E-03   .3040029E-03
   .2638515E-03   .2198913E-03   .1800525E-03   .1275332E-03   .5650353E-04
  -.6245482E-05  -.7504722E-04  -.1999566E-03  -.3598454E-03  -.4953732E-03
  -.5823520E-03  -.6218034E-03  -.5836838E-03  -.4613485E-03  -.3049995E-03
  -.1703053E-03  -.1005742E-03  -.1150965E-03  -.2002859E-03  -.2985088E-03
  -.3386873E-03  -.3114418E-03  -.2568779E-03  -.2142749E-03  -.1867918E-03
  -.1701580E-03  -.1781393E-03  -.2043094E-03  -.2203763E-03  -.1990315E-03
  -.1512144E-03  -.1426823E-03  -.2076054E-03  -.3220108E-03  -.4527950E-03
  -.5972386E-03  -.7504273E-03  -.8449149E-03  -.8198770E-03  -.6606144E-03
  -.3970562E-03  -.1004827E-03   .1660627E-03   .3851329E-03   .5628585E-03
   .6265239E-03   .5254079E-03   .3397497E-03   .1479474E-03  -.3218416E-04
  -.1850421E-03  -.2812645E-03  -.3350309E-03  -.3766807E-03  -.4456372E-03
  -.5881320E-03  -.7903309E-03  -.9741494E-03  -.1069921E-02  -.1079303E-02
  -.1004143E-02  -.8262666E-03  -.5538495E-03  -.2396764E-03   .3743963E-04
   .2354875E-03   .3430447E-03   .3356053E-03   .2191753E-03   .8476473E-04
   .2991530E-05  -.5125822E-04  -.1173877E-03  -.1946794E-03  -.2614058E-03
  -.3039347E-03  -.3559848E-03  -.4660276E-03  -.6179772E-03  -.7501573E-03
  -.8383615E-03  -.8770519E-03  -.8420535E-03  -.7293484E-03  -.5622943E-03
  -.3799895E-03  -.2350622E-03  -.1623662E-03  -.1862299E-03  -.3163517E-03
  -.5191602E-03  -.7037126E-03  -.7979636E-03  -.7877435E-03  -.7006105E-03
  -.5750755E-03  -.3889197E-03  -.1393184E-03   .1351588E-03   .3959770E-03
   .6499157E-03   .8807020E-03   .1031832E-02   .1024739E-02   .8341749E-03
   .5849277E-03   .4513764E-03   .4767679E-03   .5998722E-03   .7196732E-03
   .7395542E-03   .6471043E-03   .4783355E-03   .2965472E-03   .1767264E-03
   .1899244E-03   .3960368E-03   .7831779E-03   .1219066E-02   .1549823E-02
   .1680526E-02   .1583471E-02   .1297068E-02   .8683414E-03   .3537229E-03
  -.1728769E-03  -.6072347E-03  -.8816717E-03  -.9730900E-03  -.8978763E-03
  -.7046550E-03  -.4488626E-03  -.1765156E-03   .5747400E-04   .2348620E-03
   .3833361E-03   .5103395E-03   .6105744E-03   .6728641E-03   .7051839E-03
   .7072777E-03   .6219669E-03   .4209372E-03   .1728364E-03  -.2063754E-04
  -.9590549E-04  -.4664762E-04   .8773314E-04   .2693139E-03   .4487362E-03
   .5740408E-03   .6276982E-03   .6099764E-03   .5705423E-03   .5622568E-03
   .6049523E-03   .7085151E-03   .8493288E-03   .9558566E-03   .9452552E-03
   .8172801E-03   .6145449E-03   .3923051E-03   .1719382E-03  -.2168045E-04
  -.1214382E-03  -.7076653E-04   .1178220E-03   .3987488E-03   .6871383E-03
   .8451019E-03   .7932469E-03   .5421396E-03   .1709625E-03  -.2230837E-03
  -.5679298E-03  -.8308062E-03  -.1028431E-02  -.1184178E-02  -.1357599E-02
  -.1609327E-02  -.1938817E-02  -.2272141E-02  -.2452137E-02  -.2301151E-02
  -.1795131E-02  -.1074265E-02  -.2754799E-03   .4626224E-03   .1014597E-02
   .1314434E-02   .1393653E-02   .1376249E-02   .1363463E-02   .1377004E-02
   .1396122E-02   .1328480E-02   .1032449E-02   .5074257E-03  -.1063493E-03
  -.6213815E-03  -.8807827E-03  -.8623292E-03  -.6274349E-03  -.2742753E-03
   .6821524E-04   .2833203E-03   .2842224E-03   .4758469E-04  -.3501693E-03
  -.7626864E-03  -.1067695E-02  -.1204457E-02  -.1177228E-02  -.1025798E-02
  -.8395458E-03  -.7548466E-03  -.8772065E-03  -.1195949E-02  -.1579275E-02
  -.1824403E-02  -.1804175E-02  -.1561477E-02  -.1214535E-02  -.8726940E-03
  -.6284546E-03  -.5240985E-03  -.5090888E-03  -.5180531E-03  -.5541608E-03
  -.6464937E-03  -.7984632E-03  -.9777026E-03  -.1114725E-02  -.1151948E-02
  -.1102554E-02  -.9910130E-03  -.8317941E-03  -.6514574E-03  -.4379037E-03
  -.1701355E-03   .1191751E-03   .3610768E-03   .5158441E-03   .6508687E-03
   .8774369E-03   .1201522E-02   .1522491E-02   .1731537E-02   .1780609E-02
   .1703562E-02   .1567087E-02   .1453555E-02   .1419036E-02   .1480335E-02
   .1646724E-02   .1930005E-02   .2320775E-02   .2723439E-02   .2991222E-02
   .3021804E-02   .2816368E-02   .2477824E-02   .2119175E-02   .1797472E-02
   .1580451E-02   .1495238E-02   .1481015E-02   .1419765E-02   .1200851E-02
   .7511717E-03   .1052549E-03  -.5791665E-03  -.1111897E-02  -.1420509E-02
  -.1554107E-02  -.1555680E-02  -.1459717E-02  -.1338189E-02  -.1265152E-02
  -.1259047E-02  -.1293791E-02  -.1334355E-02  -.1386668E-02  -.1478580E-02
  -.1628568E-02  -.1849035E-02  -.2099733E-02  -.2272223E-02  -.2292441E-02
  -.2129101E-02  -.1794308E-02  -.1350238E-02  -.8217199E-03  -.2854940E-03
   .1303857E-03   .3519207E-03   .4310322E-03   .4650832E-03   .4843179E-03
   .4990705E-03   .5348764E-03   .6067744E-03   .6795457E-03   .7058186E-03
   .6770214E-03   .6197411E-03   .5452677E-03   .5088515E-03   .5541990E-03
   .5995321E-03   .5402138E-03   .3494425E-03   .6911342E-04  -.2116356E-03
  -.3905761E-03  -.4570294E-03  -.4475152E-03  -.3883010E-03  -.3358724E-03
  -.3396634E-03  -.4204109E-03  -.5436162E-03  -.6635943E-03  -.7660694E-03
  -.8112557E-03  -.6839513E-03  -.3051819E-03   .2347277E-03   .7327256E-03
   .9931456E-03   .8975550E-03   .4709378E-03  -.1153923E-03  -.6400216E-03
  -.9734224E-03  -.1154728E-02  -.1247563E-02  -.1212579E-02  -.1014721E-02
  -.7166208E-03  -.4419289E-03  -.2400735E-03  -.9966367E-04  -.3858681E-04
  -.7519761E-04  -.1806088E-03  -.2276219E-03  -.1211511E-03   .1060002E-03
   .3943485E-03   .6681409E-03   .8055297E-03   .7811097E-03   .6955560E-03
   .6846613E-03   .8451049E-03   .1225766E-02   .1742396E-02   .2174335E-02
   .2362335E-02   .2313833E-02   .2146373E-02   .1962903E-02   .1806315E-02
   .1672637E-02   .1520988E-02   .1306675E-02   .1054249E-02   .8209362E-03
   .6179351E-03   .4468057E-03   .3296141E-03   .2885734E-03   .3365560E-03
   .4348058E-03   .4707928E-03   .4180874E-03   .3741758E-03   .4321246E-03
   .6002970E-03   .7841539E-03   .8811181E-03   .8196694E-03   .5512277E-03
   .8367676E-04  -.5037560E-03  -.1080843E-02  -.1502453E-02  -.1621216E-02
  -.1378678E-02  -.8761471E-03  -.3302447E-03   .4908631E-04   .1732122E-03
   .7245572E-04  -.1755484E-03  -.4811325E-03  -.7550430E-03  -.9441285E-03
  -.1025045E-02  -.1052256E-02  -.1112705E-02  -.1232906E-02  -.1401657E-02
  -.1610405E-02  -.1796181E-02  -.1882241E-02  -.1858717E-02  -.1721470E-02
  -.1457817E-02  -.1111188E-02  -.7748328E-03  -.5451973E-03  -.4444712E-03
  -.4591493E-03  -.5960603E-03  -.8834670E-03  -.1264924E-02  -.1599188E-02
  -.1756308E-02  -.1686878E-02  -.1422394E-02  -.1002203E-02  -.4974787E-03
  -.9463210E-05   .4120944E-03   .7167955E-03   .8568679E-03   .8252277E-03
   .6494707E-03   .4020473E-03   .1661849E-03  -.7200922E-04  -.3682333E-03
  -.6947311E-03  -.9636189E-03  -.1059675E-02  -.9106645E-03  -.5018754E-03
   .9580434E-04   .7407504E-03   .1252186E-02   .1416638E-02   .1095844E-02
   .3715940E-03  -.4967173E-03  -.1250107E-02  -.1775562E-02  -.2045388E-02
  -.2081412E-02  -.1953265E-02  -.1709578E-02  -.1415807E-02  -.1174228E-02
  -.1047372E-02  -.1016950E-02  -.9983180E-03  -.8784068E-03  -.5889418E-03
  -.1834586E-03   .1969525E-03   .3932663E-03   .2978228E-03  -.6115958E-04
  -.4893791E-03  -.7795778E-03  -.8359431E-03  -.7010811E-03  -.4540935E-03
  -.1434070E-03   .1807277E-03   .4952139E-03   .7807659E-03   .9918287E-03
   .1114762E-02   .1221287E-02   .1355034E-02   .1462253E-02   .1489281E-02
   .1434538E-02   .1316566E-02   .1198474E-02   .1200379E-02   .1422011E-02
   .1870382E-02   .2408370E-02   .2835906E-02   .2996673E-02   .2830068E-02
   .2365959E-02   .1763568E-02   .1246384E-02   .9676257E-03   .9356476E-03
   .1093233E-02   .1332786E-02   .1475609E-02   .1431761E-02   .1247769E-02
   .1058902E-02   .9530597E-03   .8607060E-03   .7248028E-03   .5814830E-03
   .4876611E-03   .4322284E-03   .3775771E-03   .3111692E-03   .1838060E-03
  -.1937799E-04  -.2485912E-03  -.4674174E-03  -.6773000E-03  -.9434765E-03
  -.1341789E-02  -.1780076E-02  -.2078023E-02  -.2163864E-02  -.2040687E-02
  -.1709803E-02  -.1206569E-02  -.6395183E-03  -.1819450E-03   .3185949E-04
  -.6967974E-04  -.5630255E-03  -.1385697E-02  -.2293713E-02  -.2999126E-02
  -.3272404E-02  -.2993206E-02  -.2192848E-02  -.1120306E-02  -.1397080E-03
   .4742253E-03   .6641330E-03   .5715946E-03   .3863205E-03   .2079744E-03
   .8201591E-04  -.1091489E-04  -.1653154E-03  -.4280633E-03  -.7385309E-03
  -.1011495E-02  -.1176578E-02  -.1122300E-02  -.7345315E-03   .3555339E-05
   .9145399E-03   .1707704E-02   .2120385E-02   .2027333E-02   .1460998E-02
   .5693274E-03  -.4318196E-03  -.1278033E-02  -.1716951E-02  -.1621452E-02
  -.1018215E-02  -.1224789E-03   .7461394E-03   .1325873E-02   .1480125E-02
   .1256737E-02   .8422116E-03   .4416824E-03   .1391581E-03  -.9672901E-04
  -.3046850E-03  -.5048761E-03  -.7178986E-03  -.8919318E-03  -.8957797E-03
  -.6102057E-03  -.1605846E-04   .7489580E-03   .1510543E-02   .2139766E-02
   .2522303E-02   .2633137E-02   .2580100E-02   .2513084E-02   .2583631E-02
   .2834462E-02   .3104363E-02   .3191143E-02   .3013421E-02   .2643177E-02
   .2257549E-02   .1971345E-02   .1828287E-02   .1843369E-02   .1979875E-02
   .2149676E-02   .2258764E-02   .2236229E-02   .2037737E-02   .1652395E-02
   .1105964E-02   .4597302E-03  -.2013487E-03  -.8057881E-03  -.1323980E-02
  -.1750032E-02  -.2078332E-02  -.2280368E-02  -.2345817E-02  -.2287915E-02
  -.2188221E-02  -.2189311E-02  -.2414979E-02  -.2857570E-02  -.3411260E-02
  -.3892202E-02  -.4137634E-02  -.4080039E-02  -.3750225E-02  -.3265991E-02
  -.2784540E-02  -.2432140E-02  -.2288799E-02  -.2408130E-02  -.2731288E-02
  -.3072934E-02  -.3257424E-02  -.3154063E-02  -.2727897E-02  -.2100282E-02
  -.1438181E-02  -.8870955E-03  -.4947518E-03  -.1763246E-03   .1628582E-03
   .5829974E-03   .1073137E-02   .1524003E-02   .1766091E-02   .1675865E-02
   .1269342E-02   .7113696E-03   .2290098E-03   .3345637E-04   .2171482E-03
   .7474886E-03   .1533787E-02   .2363293E-02   .2954667E-02   .3183040E-02
   .3108552E-02   .2872197E-02   .2611066E-02   .2358894E-02   .2012240E-02
   .1454219E-02   .6512929E-03  -.2956444E-03  -.1176701E-02  -.1772755E-02
  -.1972161E-02  -.1795274E-02  -.1357486E-02  -.8095875E-03  -.3000987E-03
   .1483128E-04   .8569105E-05  -.2959063E-03  -.7046792E-03  -.9522549E-03
  -.8906519E-03  -.5500996E-03  -.7479905E-04   .4235014E-03   .8270327E-03
   .9481942E-03   .6492794E-03  -.8142016E-05  -.7778272E-03  -.1365514E-02
  -.1542245E-02  -.1254609E-02  -.6329061E-03   .5598267E-04   .5347359E-03
   .7076633E-03   .6895264E-03   .6642674E-03   .7483303E-03   .9333322E-03
   .1139497E-02   .1263841E-02   .1197532E-02   .9112821E-03   .4580304E-03
   .1261538E-04  -.1859118E-03   .1785789E-04   .5865454E-03   .1258497E-02
   .1692286E-02   .1603125E-02   .9067730E-03  -.1753936E-03  -.1193425E-02
  -.1748654E-02  -.1706335E-02  -.1116039E-02  -.1842949E-03   .7912266E-03
   .1544836E-02   .1885388E-02   .1768380E-02   .1342242E-02   .8330883E-03
   .3837918E-03   .5085583E-04  -.1642314E-03  -.3205758E-03  -.4476083E-03
  -.5257679E-03  -.5756069E-03  -.6253392E-03  -.6465138E-03  -.5738336E-03
  -.3422361E-03  -.6697150E-06   .2617021E-03   .2405378E-03  -.1887908E-03
  -.1004039E-02  -.2018860E-02  -.2917237E-02  -.3369251E-02  -.3113218E-02
  -.2108437E-02  -.6131663E-03   .9021545E-03   .1967547E-02   .2309253E-02
   .1892418E-02   .8952479E-03  -.2882090E-03  -.1256151E-02  -.1796730E-02
  -.1926964E-02  -.1788418E-02  -.1508876E-02  -.1181866E-02  -.8376177E-03
  -.4868231E-03  -.1779069E-03  -.2656299E-04  -.8333505E-04  -.2447808E-03
  -.3452656E-03  -.3005336E-03  -.1150866E-03   .1209184E-03   .2408802E-03
   .9533575E-04  -.3585106E-03  -.1020155E-02  -.1648744E-02  -.1956275E-02
  -.1735983E-02  -.9703977E-03   .1240442E-03   .1195502E-02   .1926737E-02
   .2131886E-02   .1768828E-02   .9736353E-03  -.1997487E-04  -.9323572E-03
  -.1477825E-02  -.1518078E-02  -.1083443E-02  -.2915159E-03   .7211610E-03
   .1829624E-02   .2936972E-02   .3977287E-02   .4916542E-02   .5703020E-02
   .6166926E-02   .6091474E-02   .5366844E-02   .4016893E-02   .2246763E-02
   .4684426E-03  -.9142307E-03  -.1640694E-02  -.1681224E-02  -.1238560E-02
  -.6735455E-03  -.3539856E-03  -.5199607E-03  -.1139634E-02  -.1907661E-02
  -.2399203E-02  -.2300311E-02  -.1526231E-02  -.2391115E-03   .1176441E-02
   .2251471E-02   .2613490E-02   .2174017E-02   .1152817E-02  -.4589616E-06
  -.8043466E-03  -.9571592E-03  -.4016446E-03   .6162766E-03   .1663644E-02
   .2294057E-02   .2316046E-02   .1850260E-02   .1123872E-02   .3859267E-03
  -.1810672E-03  -.5300469E-03  -.7254846E-03  -.8469021E-03  -.9317934E-03
  -.1019469E-02  -.1065577E-02  -.9571302E-03  -.6143383E-03  -.2207972E-04
   .7422768E-03   .1464586E-02   .1900807E-02   .1910004E-02   .1487135E-02
   .7774938E-03   .1023625E-04  -.6303200E-03  -.1095563E-02  -.1453252E-02
  -.1868416E-02  -.2497140E-02  -.3328104E-02  -.4203751E-02  -.4952221E-02
  -.5425596E-02  -.5539901E-02  -.5323731E-02  -.4819857E-02  -.4072976E-02
  -.3140974E-02  -.2137318E-02  -.1252174E-02  -.6055153E-03  -.1829645E-03
   .1313896E-03   .4462330E-03   .7695802E-03   .1065558E-02   .1303579E-02
   .1444609E-02   .1405384E-02   .1165558E-02   .8059753E-03   .4857698E-03
   .3407292E-03   .4449743E-03   .7943201E-03   .1278422E-02   .1765394E-02
   .2136816E-02   .2302808E-02   .2259545E-02   .2104207E-02   .1962153E-02
   .1902572E-02   .1878544E-02   .1714445E-02   .1284978E-02   .5768831E-03
  -.3495017E-03  -.1466172E-02  -.2746631E-02  -.4058503E-02  -.5134072E-02
  -.5701170E-02  -.5654419E-02  -.5084394E-02  -.4197997E-02  -.3245479E-02
  -.2397032E-02  -.1627106E-02  -.7713787E-03   .2548514E-03   .1363515E-02
   .2284835E-02   .2719136E-02   .2507628E-02   .1691385E-02   .5071668E-03
  -.6904590E-03  -.1550614E-02  -.1913162E-02  -.1780087E-02  -.1241378E-02
  -.4925925E-03   .2088560E-03   .6951410E-03   .9267211E-03   .9095314E-03
   .6556248E-03   .1984585E-03  -.3422315E-03  -.8373171E-03  -.1245789E-02
  -.1583426E-02  -.1922141E-02  -.2302573E-02  -.2683796E-02  -.2981993E-02
  -.3134168E-02  -.3066812E-02  -.2661038E-02  -.1820559E-02  -.5888031E-03
   .8438754E-03   .2179073E-02   .3137705E-02   .3666418E-02   .3843675E-02
   .3704949E-02   .3202745E-02   .2315816E-02   .1172269E-02   .2691253E-04
  -.8793756E-03  -.1413597E-02  -.1476078E-02  -.9858797E-03   .3515296E-04
   .1404585E-02   .2775161E-02   .3716314E-02   .3864144E-02   .3112456E-02
   .1692258E-02   .7194862E-04  -.1230155E-02  -.1851562E-02  -.1704270E-02
  -.9754155E-03  -.5194535E-04   .6214082E-03   .7256982E-03   .2418551E-03
  -.5131053E-03  -.1023946E-02  -.8411348E-03   .1679204E-03   .1794544E-02
   .3573124E-02   .4867520E-02   .5131712E-02   .4219871E-02   .2513884E-02
   .7827542E-03  -.2116137E-03  -.7917867E-04   .1063359E-02   .2695272E-02
   .4136491E-02   .4814775E-02   .4437590E-02   .3119572E-02   .1340775E-02
  -.2907377E-03  -.1329217E-02  -.1656420E-02  -.1440519E-02  -.1028609E-02
  -.7403899E-03  -.7392649E-03  -.1030518E-02  -.1445592E-02  -.1751432E-02
  -.1807268E-02  -.1564121E-02  -.1017011E-02  -.2113806E-03   .7363140E-03
   .1636563E-02   .2307912E-02   .2623457E-02   .2468841E-02   .1812513E-02
   .7980765E-03  -.2840664E-03  -.1124522E-02  -.1482917E-02  -.1283703E-02
  -.6680901E-03   .8883350E-04   .7872593E-03   .1372606E-02   .1855943E-02
   .2228018E-02   .2364273E-02   .2121789E-02   .1470695E-02   .5297673E-03
  -.4342502E-03  -.1094710E-02  -.1224668E-02  -.7969006E-03   .6302887E-04
   .1118519E-02   .2016675E-02   .2469925E-02   .2389004E-02   .1928537E-02
   .1405397E-02   .1143873E-02   .1415983E-02   .2346028E-02   .3762330E-02
   .5253452E-02   .6337589E-02   .6660926E-02   .6197649E-02   .5240224E-02
   .4133709E-02   .3127956E-02   .2375195E-02   .1884326E-02   .1572652E-02
   .1355193E-02   .1157928E-02   .8874369E-03   .4986517E-03   .6469261E-04
  -.2278879E-03  -.2372061E-03   .6924700E-04   .6532673E-03   .1398117E-02
   .2089252E-02   .2504056E-02   .2510088E-02   .2077694E-02   .1279480E-02
   .2994061E-03  -.6430979E-03  -.1359662E-02  -.1751001E-02  -.1825560E-02
  -.1591560E-02  -.1080842E-02  -.4608739E-03   .2427476E-04   .2012908E-03
   .1099398E-03  -.8897307E-04  -.2804671E-03  -.4419487E-03  -.6669786E-03
  -.1096317E-02  -.1760788E-02  -.2562513E-02  -.3414178E-02  -.4329269E-02
  -.5318463E-02  -.6310545E-02  -.7093510E-02  -.7386441E-02  -.7028572E-02
  -.6085527E-02  -.4836102E-02  -.3648528E-02  -.2825629E-02  -.2538568E-02
  -.2730891E-02  -.3135736E-02  -.3386574E-02  -.3229133E-02  -.2596236E-02
  -.1587432E-02  -.4543617E-03   .5385698E-03   .1196132E-02   .1434444E-02
   .1293877E-02   .9229575E-03   .5708844E-03   .5156131E-03   .8922489E-03
   .1621943E-02   .2446057E-02   .3066446E-02   .3429099E-02   .3715797E-02
   .4167985E-02   .4924923E-02   .5811414E-02   .6436883E-02   .6440415E-02
   .5662963E-02   .4200152E-02   .2334143E-02   .4527285E-03  -.1055139E-02
  -.1872609E-02  -.1870535E-02  -.1195766E-02  -.1528664E-03   .9544655E-03
   .1885760E-02   .2480059E-02   .2621140E-02   .2190868E-02   .1194123E-02
  -.1995202E-03  -.1772472E-02  -.3277602E-02  -.4428739E-02  -.4980452E-02
  -.4834699E-02  -.4102162E-02  -.3045641E-02  -.2009554E-02  -.1362615E-02
  -.1356475E-02  -.2022889E-02  -.3119216E-02  -.4130913E-02  -.4532616E-02
  -.4063519E-02  -.2860418E-02  -.1382853E-02  -.1725408E-03   .4396757E-03
   .4227473E-03  -.7338349E-04  -.8412080E-03  -.1666899E-02  -.2366813E-02
  -.2767379E-02  -.2715500E-02  -.2117314E-02  -.9570905E-03   .6470623E-03
   .2458668E-02   .4103486E-02   .5183970E-02   .5493069E-02   .5024858E-02
   .3954493E-02   .2635501E-02   .1491446E-02   .8222928E-03   .6746152E-03
   .8187186E-03   .8900697E-03   .6511919E-03   .7316208E-04  -.6323409E-03
  -.1183083E-02  -.1420100E-02  -.1310435E-02  -.8966356E-03  -.2707800E-03
   .3959887E-03   .8953684E-03   .1077219E-02   .9143240E-03   .5062806E-03
   .1216774E-03   .1018413E-03   .6664007E-03   .1767491E-02   .3045992E-02
   .3994566E-02   .4210546E-02   .3540540E-02   .2172456E-02   .6116669E-03
  -.5884456E-03  -.1119959E-02  -.9886767E-03  -.4257946E-03   .2147024E-03
   .5641119E-03   .3724428E-03  -.3831296E-03  -.1575333E-02  -.3058426E-02
  -.4611689E-02  -.5929982E-02  -.6655829E-02  -.6492897E-02  -.5380659E-02
  -.3577063E-02  -.1619098E-02  -.8160700E-04   .6991605E-03   .7607210E-03
   .4294848E-03   .1313803E-03   .1550243E-03   .5665144E-03   .1236345E-02
   .1836988E-02   .2044031E-02   .1749147E-02   .1090495E-02   .3383805E-03
  -.2983577E-03  -.7080374E-03  -.7713004E-03  -.4367069E-03   .1629684E-03
   .7576925E-03   .1091386E-02   .1081538E-02   .8649037E-03   .6938675E-03
   .7491105E-03   .9826418E-03   .1226296E-02   .1325295E-02   .1262823E-02
   .1179397E-02   .1296963E-02   .1787694E-02   .2614504E-02   .3646783E-02
   .4708372E-02   .5570251E-02   .6052999E-02   .6091836E-02   .5721420E-02
   .5038123E-02   .4196719E-02   .3408201E-02   .2807720E-02   .2393473E-02
   .2120477E-02   .1974869E-02   .1943866E-02   .1880263E-02   .1601708E-02
   .1063742E-02   .2950463E-03  -.6352964E-03  -.1664202E-02  -.2768129E-02
  -.3929962E-02  -.5068719E-02  -.6003228E-02  -.6543411E-02  -.6548852E-02
  -.5992382E-02  -.5012580E-02  -.3822031E-02  -.2649164E-02  -.1801227E-02
  -.1592509E-02  -.2135878E-02  -.3276951E-02  -.4627397E-02  -.5704550E-02
  -.6144070E-02  -.5808267E-02  -.4807372E-02  -.3394875E-02  -.1806639E-02
  -.2287697E-03   .1170209E-02   .2185992E-02   .2636761E-02   .2433593E-02
   .1654114E-02   .4662007E-03  -.9209961E-03  -.2236832E-02  -.3237224E-02
  -.3782164E-02  -.3818362E-02  -.3385429E-02  -.2614491E-02  -.1716971E-02
  -.9193184E-03  -.3928815E-03  -.1813723E-03  -.2562695E-03  -.5657256E-03
  -.9506904E-03  -.1179561E-02  -.1045281E-02  -.4678061E-03   .5437926E-03
   .1878796E-02   .3311949E-02   .4539968E-02   .5302777E-02   .5485123E-02
   .5099883E-02   .4256107E-02   .3165873E-02   .2129446E-02   .1396087E-02
   .1004335E-02   .8284705E-03   .6886433E-03   .4188861E-03  -.1212605E-04
  -.5236766E-03  -.1039903E-02  -.1494678E-02  -.1826268E-02  -.1987244E-02
  -.1943365E-02  -.1673851E-02  -.1148587E-02  -.3625525E-03   .6002929E-03
   .1537480E-02   .2204262E-02   .2346711E-02   .1834535E-02   .8151859E-03
  -.3790536E-03  -.1425370E-02  -.2122460E-02  -.2425554E-02  -.2415779E-02
  -.2231557E-02  -.1979731E-02  -.1680104E-02  -.1288517E-02  -.7284347E-03
  -.2321387E-04   .6702854E-03   .1140669E-02   .1258392E-02   .1025771E-02
   .5567445E-03   .9628241E-05  -.4423584E-03  -.6387288E-03  -.5301265E-03
  -.1997836E-03   .2334517E-03   .7155165E-03   .1244506E-02   .1856240E-02
   .2613410E-02   .3530022E-02   .4636309E-02   .5839580E-02   .6856210E-02
   .7358545E-02   .7067704E-02   .5829399E-02   .3725938E-02   .1137456E-02
  -.1385137E-02  -.3323956E-02  -.4348722E-02  -.4455300E-02  -.3946024E-02
  -.3199456E-02  -.2551145E-02  -.2223534E-02  -.2311229E-02  -.2719294E-02
  -.3181232E-02  -.3474302E-02  -.3474661E-02  -.3144773E-02  -.2549942E-02
  -.1888829E-02  -.1389763E-02  -.1151142E-02  -.1089935E-02  -.1054338E-02
  -.8717057E-03  -.4257005E-03   .2692950E-03   .1065235E-02   .1686311E-02
   .1874394E-02   .1580805E-02   .9827007E-03   .3292729E-03  -.2278233E-03
  -.6654487E-03  -.9978896E-03  -.1193601E-02  -.1082122E-02  -.5141725E-03
   .4206073E-03   .1371404E-02   .1966468E-02   .2122490E-02   .2042651E-02
   .1995164E-02   .2067169E-02   .2198927E-02   .2291917E-02   .2283497E-02
   .2167423E-02   .1925366E-02   .1532570E-02   .1025055E-02   .5717862E-03
   .4429860E-03   .8076313E-03   .1628421E-02   .2638084E-02   .3475327E-02
   .3862288E-02   .3705886E-02   .3043390E-02   .2030092E-02   .9332845E-03
  -.1578115E-04  -.6321999E-03  -.7148113E-03  -.2068044E-03   .6042535E-03
   .1214035E-02   .1241786E-02   .6685666E-03  -.2170732E-03  -.1078171E-02
  -.1646778E-02  -.1781938E-02  -.1479113E-02  -.8112215E-03   .1432098E-04
   .6741317E-03   .8598223E-03   .3958691E-03  -.6113057E-03  -.1832359E-02
  -.2920873E-02  -.3667857E-02  -.4016200E-02  -.4022002E-02  -.3784570E-02
  -.3299410E-02  -.2512638E-02  -.1510199E-02  -.4449618E-03   .5984597E-03
   .1539743E-02   .2254626E-02   .2588355E-02   .2431830E-02   .1767999E-02
   .7241119E-03  -.3946236E-03  -.1164552E-02  -.1230059E-02  -.4807650E-03
   .9260638E-03   .2583112E-02   .3958934E-02   .4646719E-02   .4520063E-02
   .3723712E-02   .2564920E-02   .1368943E-02   .4404175E-03   .9591549E-04
   .5195635E-03   .1587955E-02   .2881398E-02   .3836856E-02   .3966010E-02
   .3156481E-02   .1819334E-02   .6513916E-03   .2252576E-03   .6631208E-03
   .1599397E-02   .2486035E-02   .2934665E-02   .2891404E-02   .2560194E-02
   .2237819E-02   .2150163E-02   .2349114E-02   .2682191E-02   .2817629E-02
   .2389380E-02   .1250515E-02  -.3882660E-03  -.2059371E-02  -.3277336E-02
  -.3792160E-02  -.3722190E-02  -.3409974E-02  -.3124921E-02  -.2966308E-02
  -.2929814E-02  -.3005761E-02  -.3223828E-02  -.3637768E-02  -.4181535E-02
  -.4648372E-02  -.4841314E-02  -.4719616E-02  -.4384322E-02  -.4015640E-02
  -.3742293E-02  -.3613753E-02  -.3634866E-02  -.3783189E-02  -.4037571E-02
  -.4263671E-02  -.4223085E-02  -.3756869E-02  -.2853503E-02  -.1673336E-02
  -.5528776E-03   .1073471E-03   .4681115E-04  -.6493787E-03  -.1606680E-02
  -.2406270E-02  -.2749422E-02  -.2522559E-02  -.1850056E-02  -.1038036E-02
  -.5301166E-03  -.7152743E-03  -.1645301E-02  -.2995836E-02  -.4185844E-02
  -.4638767E-02  -.4112455E-02  -.2852093E-02  -.1394510E-02  -.2828106E-03
   .1315941E-03  -.2040011E-03  -.1084696E-02  -.2115957E-02  -.2858814E-02
  -.3012751E-02  -.2484329E-02  -.1376982E-02   .5596466E-04   .1490793E-02
   .2601691E-02   .3158264E-02   .3188911E-02   .2836700E-02   .2224117E-02
   .1537790E-02   .9791073E-03   .7510806E-03   .9882559E-03   .1577005E-02
   .2169001E-02   .2382387E-02   .2011379E-02   .1107428E-02  -.9451121E-04
  -.1306794E-02  -.2283169E-02  -.2878149E-02  -.3068911E-02  -.2992520E-02
  -.2866655E-02  -.2820568E-02  -.2868030E-02  -.2998100E-02  -.3183373E-02
  -.3374039E-02  -.3532246E-02  -.3643314E-02  -.3611354E-02  -.3274741E-02
  -.2549938E-02  -.1476736E-02  -.1850516E-03   .1165754E-02   .2456791E-02
   .3590489E-02   .4468866E-02   .4992423E-02   .5121331E-02   .4919276E-02
   .4526256E-02   .4129544E-02   .3864655E-02   .3741008E-02   .3703715E-02
   .3681458E-02   .3670622E-02   .3708005E-02   .3812013E-02   .3920075E-02
   .3787723E-02   .3092270E-02   .1699434E-02  -.1625907E-03  -.1930783E-02
  -.3001987E-02  -.3062101E-02  -.2249547E-02  -.1014819E-02   .1309670E-03
   .8140277E-03   .9669914E-03   .8080591E-03   .6370943E-03   .6737967E-03
   .9971538E-03   .1520019E-02   .1985166E-02   .2115541E-02   .1741019E-02
   .8394078E-03  -.4471337E-03  -.1786498E-02  -.2785714E-02  -.3201834E-02
  -.3024951E-02  -.2462889E-02  -.1788012E-02  -.1243964E-02  -.9508298E-03
  -.8489376E-03  -.7797451E-03  -.5264293E-03   .7741874E-04   .1025819E-02
   .2100983E-02   .2875378E-02   .2888272E-02   .1915172E-02   .9492965E-04
  -.2081949E-02  -.3959010E-02  -.4961234E-02  -.4792834E-02  -.3515500E-02
  -.1510602E-02   .7304860E-03   .2794407E-02   .4430707E-02   .5494965E-02
   .5903696E-02   .5682406E-02   .4978167E-02   .4048960E-02   .3127682E-02
   .2378118E-02   .1835241E-02   .1411900E-02   .1004218E-02   .5497853E-03
   .5935944E-04  -.3223068E-03  -.4246572E-03  -.2075868E-03   .2066480E-03
   .5966844E-03   .7628963E-03   .6359496E-03   .2674544E-03  -.1981393E-03
  -.5689674E-03  -.6987212E-03  -.4840264E-03   .1038800E-03   .9155519E-03
   .1692148E-02   .2192339E-02   .2328580E-02   .2179235E-02   .1897236E-02
   .1641071E-02   .1604181E-02   .1938210E-02   .2690862E-02   .3769308E-02
   .4906096E-02   .5759306E-02   .6054996E-02   .5718320E-02   .4899967E-02
   .3816821E-02   .2688095E-02   .1705509E-02   .1002281E-02   .6101903E-03
   .5145635E-03   .6883066E-03   .1076580E-02   .1579509E-02   .2010636E-02
   .2140302E-02   .1759461E-02   .7727223E-03  -.7277897E-03  -.2475460E-02
  -.4121362E-02  -.5315469E-02  -.5834849E-02  -.5643122E-02  -.4855926E-02
  -.3701642E-02  -.2472922E-02  -.1435985E-02  -.7471528E-03  -.4538879E-03
  -.4640585E-03  -.5727434E-03  -.5341575E-03  -.1259199E-03   .7812170E-03
   .2196556E-02   .3986766E-02   .5848073E-02   .7375037E-02   .8173016E-02
   .7972681E-02   .6819131E-02   .5104128E-02   .3378893E-02   .2136972E-02
   .1593052E-02   .1642960E-02   .1955123E-02   .2115889E-02   .1804468E-02
   .9433916E-03  -.2997298E-03  -.1601475E-02  -.2598284E-02  -.3054403E-02
  -.2932271E-02  -.2386176E-02  -.1693328E-02  -.1070444E-02  -.5834426E-03
  -.1952264E-03   .1341335E-03   .3106286E-03   .1445394E-03  -.4857373E-03
  -.1516711E-02  -.2670449E-02  -.3590158E-02  -.3994163E-02  -.3836419E-02
  -.3322804E-02  -.2783160E-02  -.2519687E-02  -.2658495E-02  -.3109522E-02
  -.3652875E-02  -.4101898E-02  -.4312711E-02  -.4162066E-02  -.3628472E-02
  -.2863617E-02  -.2151017E-02  -.1807903E-02  -.1962980E-02  -.2437509E-02
  -.2929871E-02  -.3224628E-02  -.3212353E-02  -.2883268E-02  -.2358261E-02
  -.1891857E-02  -.1768997E-02  -.2148838E-02  -.3033695E-02  -.4311485E-02
  -.5770589E-02  -.7137409E-02  -.8189660E-02  -.8794245E-02  -.8849319E-02
  -.8288465E-02  -.7143764E-02  -.5551972E-02  -.3709944E-02  -.1902147E-02
  -.4201879E-03   .5052291E-03   .7698963E-03   .5004964E-03  -.7102264E-05
  -.3640260E-03  -.2246597E-03   .5621361E-03   .1847734E-02   .3211453E-02
   .4117539E-02   .4137182E-02   .3162962E-02   .1426746E-02  -.6258782E-03
  -.2408815E-02  -.3412089E-02  -.3449718E-02  -.2705574E-02  -.1589164E-02
  -.5352260E-03   .1609715E-03   .3856944E-03   .1869388E-03  -.1949773E-03
  -.3779392E-03  -.2721365E-04   .9536648E-03   .2336571E-02   .3680165E-02
   .4578789E-02   .4816551E-02   .4468903E-02   .3822055E-02   .3163915E-02
   .2662672E-02   .2361984E-02   .2231193E-02   .2216468E-02   .2241004E-02
   .2186601E-02   .1883437E-02   .1223512E-02   .2444456E-03  -.9066441E-03
  -.2016555E-02  -.2796020E-02  -.2975779E-02  -.2461384E-02  -.1468306E-02
  -.4328100E-03   .2177514E-03   .3520303E-03   .1318937E-03  -.1993134E-03
  -.4874576E-03  -.6069892E-03  -.3321905E-03   .4921112E-03   .1812657E-02
   .3325149E-02   .4564566E-02   .5155653E-02   .5001765E-02   .4326671E-02
   .3535055E-02   .2988514E-02   .2857223E-02   .3090701E-02   .3432436E-02
   .3564313E-02   .3291502E-02   .2622004E-02   .1699717E-02   .6910952E-03
  -.2756609E-03  -.1134330E-02  -.1899105E-02  -.2560760E-02  -.3093052E-02
  -.3552242E-02  -.4126438E-02  -.4970209E-02  -.6098879E-02  -.7335716E-02
  -.8295083E-02  -.8604635E-02  -.8083953E-02  -.6818515E-02  -.5103657E-02
  -.3303884E-02  -.1728121E-02  -.5765067E-03   .1169549E-03   .4567980E-03
   .5609340E-03   .4760744E-03   .1894643E-03  -.2595294E-03  -.7839997E-03
  -.1304473E-02  -.1777413E-02  -.2216760E-02  -.2654778E-02  -.3112749E-02
  -.3528104E-02  -.3771565E-02  -.3769925E-02  -.3562863E-02  -.3246565E-02
  -.2890255E-02  -.2523454E-02  -.2166396E-02  -.1810248E-02  -.1407736E-02
  -.9356680E-03  -.4321057E-03   .2587539E-04   .3868863E-03   .6479472E-03
   .8089565E-03   .8893276E-03   .9539911E-03   .1072968E-02   .1265380E-02
   .1439466E-02   .1378415E-02   .9344577E-03   .1856540E-03  -.6034406E-03
  -.1107971E-02  -.1142528E-02  -.7847253E-03  -.3160178E-03   .3596683E-04
   .2163788E-03   .3220284E-03   .5166034E-03   .9481249E-03   .1645934E-02
   .2443191E-02   .3051227E-02   .3125668E-02   .2451007E-02   .1127895E-02
  -.4494192E-03  -.1779213E-02  -.2489841E-02  -.2494849E-02  -.2010432E-02
  -.1423626E-02  -.1082408E-02  -.1077360E-02  -.1190757E-02  -.1038169E-02
  -.3407297E-03   .7975839E-03   .1902859E-02   .2382715E-02   .1877506E-02
   .4321717E-03  -.1552096E-02  -.3552979E-02  -.5112026E-02  -.5935197E-02
  -.5888292E-02  -.4967452E-02  -.3389181E-02  -.1546484E-02   .1241978E-03
   .1259012E-02   .1785855E-02   .1892077E-02   .1821339E-02   .1769661E-02
   .1900961E-02   .2307786E-02   .2946012E-02   .3689420E-02   .4375654E-02
   .4880704E-02   .5202851E-02   .5411558E-02   .5533112E-02   .5593600E-02
   .5607517E-02   .5496851E-02   .5210703E-02   .4760730E-02   .4255667E-02
   .3865793E-02   .3747866E-02   .3995996E-02   .4514903E-02   .4983347E-02
   .5080917E-02   .4638264E-02   .3723344E-02   .2638111E-02   .1771115E-02
   .1393516E-02   .1590153E-02   .2265731E-02   .3118343E-02   .3717757E-02
   .3683191E-02   .2906416E-02   .1608735E-02   .2663450E-03  -.6794885E-03
  -.1089752E-02  -.1123694E-02  -.1106346E-02  -.1334461E-02  -.1907134E-02
  -.2679514E-02  -.3445699E-02  -.4069249E-02  -.4460714E-02  -.4591869E-02
  -.4453169E-02  -.4023349E-02  -.3311565E-02  -.2430798E-02  -.1655187E-02
  -.1320361E-02  -.1588429E-02  -.2261467E-02  -.2864968E-02  -.2954224E-02
  -.2359602E-02  -.1260854E-02  -.1141785E-03   .5877697E-03   .6039331E-03
   .2001913E-04  -.8787759E-03  -.1750921E-02  -.2264226E-02  -.2183574E-02
  -.1452794E-02  -.2597079E-03   .9444530E-03   .1660803E-02   .1641575E-02
   .9768523E-03   .1165315E-04  -.8052814E-03  -.1125639E-02  -.8626417E-03
  -.1553540E-03   .7116506E-03   .1425006E-02   .1732231E-02   .1579821E-02
   .1150387E-02   .7594202E-03   .5757670E-03   .5350340E-03   .5683917E-03
   .7328929E-03   .1187623E-02   .2109899E-02   .3591281E-02   .5497812E-02
   .7445264E-02   .8926652E-02   .9575335E-02   .9328421E-02   .8402115E-02
   .7165242E-02   .6053160E-02   .5466109E-02   .5543393E-02   .6065841E-02
   .6544535E-02   .6458420E-02   .5608042E-02   .4212265E-02   .2756609E-02
   .1689371E-02   .1222234E-02   .1230629E-02   .1372599E-02   .1348736E-02
   .1007959E-02   .3377110E-03  -.5371543E-03  -.1368711E-02  -.1903996E-02
  -.1967463E-02  -.1544540E-02  -.8483222E-03  -.2404736E-03  -.1150168E-05
  -.1623115E-03  -.5339219E-03  -.8129645E-03  -.6998081E-03  -.4587089E-04
   .1027319E-02   .2209554E-02   .3087416E-02   .3312993E-02   .2805995E-02
   .1722584E-02   .3855993E-03  -.7982565E-03  -.1488511E-02  -.1517963E-02
  -.9783476E-03  -.2033682E-03   .4129629E-03   .6427432E-03   .5020354E-03
   .2268770E-03   .1526201E-03   .4633704E-03   .1113177E-02   .1912503E-02
   .2671878E-02   .3215823E-02   .3321113E-02   .2798583E-02   .1663751E-02
   .2229537E-03  -.1008201E-02  -.1633394E-02  -.1672413E-02  -.1472305E-02
  -.1456460E-02  -.1922314E-02  -.2924580E-02  -.4273914E-02  -.5644768E-02
  -.6708995E-02  -.7201055E-02  -.6955755E-02  -.5908378E-02  -.4140427E-02
  -.1968169E-02   .1119636E-03   .1590629E-02   .2155667E-02   .1788927E-02
   .7432280E-03  -.5822166E-03  -.1790769E-02  -.2568640E-02  -.2710622E-02
  -.2125928E-02  -.8150824E-03   .1091988E-02   .3298783E-02   .5333144E-02
   .6671596E-02   .6999983E-02   .6385166E-02   .5224652E-02   .4016774E-02
   .3136182E-02   .2737083E-02   .2787886E-02   .3135128E-02   .3630925E-02
   .4150444E-02   .4535583E-02   .4602238E-02   .4257617E-02   .3566335E-02
   .2699476E-02   .1851580E-02   .1140545E-02   .5116607E-03  -.1881859E-03
  -.1076299E-02  -.2090473E-02  -.2958844E-02  -.3343268E-02  -.3104946E-02
  -.2414145E-02  -.1597663E-02  -.9861273E-03  -.8574335E-03  -.1365010E-02
  -.2478639E-02  -.3994709E-02  -.5540343E-02  -.6607880E-02  -.6812729E-02
  -.6127034E-02  -.4906808E-02  -.3739539E-02  -.3143260E-02  -.3268769E-02
  -.3985380E-02  -.4928184E-02  -.5629241E-02  -.5762925E-02  -.5310287E-02
  -.4555285E-02  -.3866723E-02  -.3456603E-02  -.3323685E-02  -.3341356E-02
  -.3384259E-02  -.3370529E-02  -.3214707E-02  -.2762799E-02  -.1838818E-02
  -.4162469E-03   .1354578E-02   .3113362E-02   .4330550E-02   .4587189E-02
   .3822097E-02   .2337966E-02   .7047639E-03  -.4269983E-03  -.5540377E-03
   .4032234E-03   .2030785E-02   .3691835E-02   .4892254E-02   .5481781E-02
   .5612255E-02   .5522981E-02   .5341549E-02   .5067825E-02   .4610097E-02
   .3852205E-02   .2805703E-02   .1663927E-02   .7601530E-03   .3789926E-03
   .5970894E-03   .1263409E-02   .2072081E-02   .2679065E-02   .2858490E-02
   .2578657E-02   .1917864E-02   .1048030E-02   .1578499E-03  -.6330707E-03
  -.1309178E-02  -.1935774E-02  -.2611523E-02  -.3345853E-02  -.4041490E-02
  -.4522842E-02  -.4603769E-02  -.4228840E-02  -.3572184E-02  -.3015615E-02
  -.2898495E-02  -.3243793E-02  -.3739157E-02  -.3936018E-02  -.3528778E-02
  -.2485067E-02  -.1014565E-02   .4933073E-03   .1603748E-02   .1995003E-02
   .1568699E-02   .5062864E-03  -.8203974E-03  -.2016189E-02  -.2828616E-02
  -.3202016E-02  -.3197814E-02  -.2904911E-02  -.2380936E-02  -.1731916E-02
  -.1089409E-02  -.5622327E-03  -.2439478E-03  -.1720412E-03  -.2883367E-03
  -.4443262E-03  -.4539276E-03  -.1369277E-03   .5677308E-03   .1585721E-02
   .2783124E-02   .4022814E-02   .5130386E-02   .5884279E-02   .6045381E-02
   .5437436E-02   .4066996E-02   .2223694E-02   .4502151E-03  -.7324145E-03
  -.1101333E-02  -.7986447E-03  -.3177812E-03  -.2477589E-03  -.8381488E-03
  -.1925350E-02  -.3116113E-02  -.3984841E-02  -.4233862E-02  -.3781827E-02
  -.2808913E-02  -.1715242E-02  -.9958271E-03  -.1048221E-02  -.1924296E-02
  -.3271028E-02  -.4457819E-02  -.4862507E-02  -.4116448E-02  -.2307587E-02
   .2800633E-04   .2156628E-02   .3414661E-02   .3434802E-02   .2387403E-02
   .9721742E-03  -.2694676E-04  -.1650926E-03   .5341005E-03   .1658925E-02
   .2727540E-02   .3398501E-02   .3573033E-02   .3442981E-02   .3271790E-02
   .3213250E-02   .3272908E-02   .3326520E-02   .3207849E-02   .2770149E-02
   .2006576E-02   .1166271E-02   .7061448E-03   .1037033E-02   .2193690E-02
   .3780653E-02   .5149957E-02   .5723945E-02   .5298784E-02   .4090149E-02
   .2616320E-02   .1486963E-02   .1151698E-02   .1732237E-02   .3054860E-02
   .4742365E-02   .6294886E-02   .7211904E-02   .7089496E-02   .5722092E-02
   .3264991E-02   .1875238E-03  -.2927240E-02  -.5593662E-02  -.7467834E-02
  -.8340218E-02  -.8204669E-02  -.7316306E-02  -.6086830E-02  -.4942289E-02
  -.4215413E-02  -.4074274E-02  -.4446121E-02  -.5033002E-02  -.5427899E-02
  -.5309051E-02  -.4639475E-02  -.3654023E-02  -.2720600E-02  -.2209142E-02
  -.2265221E-02  -.2707511E-02  -.3213366E-02  -.3504296E-02  -.3419386E-02
  -.2907097E-02  -.2035863E-02  -.9660731E-03   .1143225E-03   .1078133E-02
   .1927788E-02   .2765109E-02   .3650253E-02   .4370310E-02   .4451596E-02
   .3429771E-02   .1264186E-02  -.1470045E-02  -.3825924E-02  -.4883672E-02
  -.4150225E-02  -.1823277E-02   .1283564E-02   .4151022E-02   .6054366E-02
   .6831234E-02   .6819764E-02   .6589808E-02   .6678081E-02   .7307302E-02
   .8229835E-02   .8865054E-02   .8604089E-02   .7076608E-02   .4398677E-02
   .1159164E-02  -.1861919E-02  -.4081951E-02  -.5372778E-02  -.6050934E-02
  -.6669887E-02  -.7681964E-02  -.9237298E-02  -.1112640E-01  -.1279980E-01
  -.1368552E-01  -.1350031E-01  -.1239304E-01  -.1083780E-01  -.9370580E-02
  -.8432328E-02  -.8290901E-02  -.8933709E-02  -.1002430E-01  -.1094661E-01
  -.1093354E-01  -.9438604E-02  -.6416184E-02  -.2347291E-02   .1968633E-02
   .5695687E-02   .8167211E-02   .9065400E-02   .8477463E-02   .6840438E-02
   .4839307E-02   .3195478E-02   .2450795E-02   .2808184E-02   .4041534E-02
   .5585522E-02   .6846331E-02   .7513699E-02   .7662967E-02   .7629866E-02
   .7854910E-02   .8706959E-02   .1029359E-01   .1234801E-01   .1434601E-01
   .1570137E-01   .1593443E-01   .1477950E-01   .1230898E-01   .8871152E-02
   .4997126E-02   .1248164E-02  -.1890013E-02  -.4053684E-02  -.5101455E-02
  -.5195032E-02  -.4670495E-02  -.3892753E-02  -.3213413E-02  -.2972816E-02
  -.3399965E-02  -.4477180E-02  -.5980351E-02  -.7532371E-02  -.8617044E-02
  -.8814651E-02  -.7970871E-02  -.6181563E-02  -.3772863E-02  -.1207510E-02
   .1015903E-02   .2471508E-02   .2910993E-02   .2388565E-02   .1328061E-02
   .3694473E-03   .3958585E-04   .5375049E-03   .1646874E-02   .2830894E-02
   .3466141E-02   .3135348E-02   .1849089E-02   .2992211E-04  -.1641686E-02
  -.2547555E-02  -.2359571E-02  -.1187894E-02   .4319384E-03   .1746828E-02
   .2081869E-02   .1165233E-02  -.7282309E-03  -.2929454E-02  -.4656921E-02
  -.5372711E-02  -.5036716E-02  -.3971862E-02  -.2678152E-02  -.1698365E-02
  -.1539617E-02  -.2480996E-02  -.4454178E-02  -.7028183E-02  -.9468445E-02
  -.1104375E-01  -.1136253E-01  -.1050422E-01  -.8941253E-02  -.7305114E-02
  -.6149077E-02  -.5776809E-02  -.6149861E-02  -.6912107E-02  -.7566199E-02
  -.7718246E-02  -.7288277E-02  -.6474877E-02  -.5573817E-02  -.4843193E-02
  -.4398384E-02  -.4181207E-02  -.4042062E-02  -.3838802E-02  -.3530988E-02
  -.3051756E-02  -.2303207E-02  -.1331741E-02  -.3332028E-03   .4823314E-03
   .9516393E-03   .9856986E-03   .6226534E-03   .4662554E-04  -.4837813E-03
  -.7787035E-03  -.8362384E-03  -.7503128E-03  -.5869550E-03  -.3816254E-03
  -.1011929E-03   .2691389E-03   .7032475E-03   .1114431E-02   .1436826E-02
   .1660960E-02   .1699078E-02   .1387103E-02   .6906808E-03  -.1963666E-03
  -.9678123E-03  -.1302426E-02  -.9966778E-03  -.7406668E-04   .1314828E-02
   .3062547E-02   .5020399E-02   .6900592E-02   .8315233E-02   .8957598E-02
   .8782475E-02   .8031690E-02   .7127258E-02   .6516621E-02   .6440627E-02
   .6663541E-02   .6636959E-02   .5864556E-02   .4170574E-02   .1818873E-02
  -.5745798E-03  -.2359064E-02  -.3089791E-02  -.2676174E-02  -.1478754E-02
  -.2081532E-03   .3555171E-03  -.3366462E-03  -.2293780E-02  -.4899139E-02
  -.7140918E-02  -.8087475E-02  -.7285001E-02  -.4898114E-02  -.1594233E-02
   .1681116E-02   .4117346E-02   .5329967E-02   .5350146E-02   .4502878E-02
   .3231489E-02   .1963784E-02   .1064772E-02   .7520581E-03   .1005951E-02
   .1650782E-02   .2407077E-02   .2969557E-02   .3073884E-02   .2565766E-02
   .1417966E-02  -.2396005E-03  -.2066815E-02  -.3626631E-02  -.4568738E-02
  -.4772773E-02  -.4314278E-02  -.3387416E-02  -.2194508E-02  -.8404514E-03
   .5806644E-03   .1925595E-02   .2994552E-02   .3655939E-02   .3923091E-02
   .3821963E-02   .3371901E-02   .2716011E-02   .2135960E-02   .1966413E-02
   .2445197E-02   .3491917E-02   .4744552E-02   .5760285E-02   .6155712E-02
   .5778004E-02   .4730813E-02   .3333821E-02   .2069607E-02   .1418457E-02
   .1727728E-02   .3127253E-02   .5519699E-02   .8599555E-02   .1193305E-01
   .1507713E-01   .1762116E-01   .1922847E-01   .1973626E-01   .1917876E-01
   .1770021E-01   .1556368E-01   .1304340E-01   .1024981E-01   .7101407E-02
   .3423237E-02  -.8684062E-03  -.5583089E-02  -.1027912E-01  -.1443027E-01
  -.1756457E-01  -.1940058E-01  -.1990461E-01  -.1924935E-01  -.1778152E-01
  -.1597154E-01  -.1432547E-01  -.1322706E-01  -.1269834E-01  -.1224044E-01
  -.1102922E-01  -.8310635E-02  -.3933411E-02   .1339773E-02   .6055287E-02
   .8823273E-02   .9017025E-02   .6977494E-02   .3803286E-02   .7335153E-03
  -.1440979E-02  -.2586934E-02  -.3148938E-02  -.3937821E-02  -.5767196E-02
  -.9088773E-02  -.1367292E-01  -.1848668E-01  -.2208705E-01  -.2329203E-01
  -.2169176E-01  -.1781479E-01  -.1294087E-01  -.8625402E-02  -.6142969E-02
  -.6029190E-02  -.7861989E-02  -.1036849E-01  -.1196452E-01  -.1159791E-01
  -.9246277E-02  -.5849739E-02  -.2841449E-02  -.1420256E-02  -.2032928E-02
  -.4293043E-02  -.7180026E-02  -.9449923E-02  -.1017099E-01  -.9138279E-02
  -.6948765E-02  -.4702789E-02  -.3479300E-02  -.3812815E-02  -.5386076E-02
  -.7207981E-02  -.8091887E-02  -.7279366E-02  -.4897532E-02  -.1849241E-02
   .6776188E-03   .1774242E-02   .1214106E-02  -.3757133E-03  -.1604864E-02
  -.8299952E-03   .3010256E-02   .9803505E-02   .1818676E-01   .2597091E-01
   .3099325E-01   .3197484E-01   .2897580E-01   .2325281E-01   .1667260E-01
   .1104247E-01   .7497675E-02   .6194481E-02   .6342283E-02   .6595244E-02
   .5718345E-02   .3144838E-02  -.7468886E-03  -.4761288E-02  -.7404974E-02
  -.7562201E-02  -.5033303E-02  -.6360118E-03   .4061649E-02   .7319229E-02
   .7941454E-02   .5882996E-02   .2382274E-02  -.6401809E-03  -.1546411E-02
   .2502911E-03   .4051241E-02   .8328152E-02   .1150113E-01   .1253799E-01
   .1125972E-01   .8312000E-02   .4771511E-02   .1645744E-02  -.5911593E-03
  -.2230002E-02  -.4080391E-02  -.6854259E-02  -.1058642E-01  -.1452507E-01
  -.1748113E-01  -.1837717E-01  -.1672988E-01  -.1291926E-01  -.8035421E-02
  -.3404878E-02   .6171905E-04   .2140369E-02   .3069196E-02   .3220296E-02
   .2869330E-02   .2080101E-02   .8186728E-03  -.8908134E-03  -.2889652E-02
  -.4836589E-02  -.6178195E-02  -.6300496E-02  -.4971909E-02  -.2671778E-02
  -.4599779E-03   .5483695E-03  -.2239627E-03  -.2563673E-02  -.5709577E-02
  -.8779036E-02  -.1112320E-01  -.1245993E-01  -.1280772E-01  -.1234929E-01
  -.1120423E-01  -.9334517E-02  -.6642265E-02  -.3190313E-02   .5912806E-03
   .3947708E-02   .6020454E-02   .6272221E-02   .4734571E-02   .1923139E-02
  -.1384403E-02  -.4348243E-02  -.6294268E-02  -.6880242E-02  -.6241778E-02
  -.5021578E-02  -.4018795E-02  -.3753273E-02  -.4201730E-02  -.4864888E-02
  -.5110711E-02  -.4554459E-02  -.3258911E-02  -.1665303E-02  -.3680516E-03
   .1334015E-03  -.4245179E-03  -.1969006E-02  -.4032254E-02  -.5831860E-02
  -.6595037E-02  -.5948120E-02  -.4097919E-02  -.1774537E-02   .1630375E-03
   .1204676E-02   .1393788E-02   .1226713E-02   .1332793E-02   .2139032E-02
   .3764821E-02   .6044883E-02   .8626934E-02   .1104318E-01   .1275587E-01
   .1330947E-01   .1250379E-01   .1045653E-01   .7480397E-02   .4054400E-02
   .7860907E-03  -.1713042E-02  -.2965538E-02  -.2714589E-02  -.9724253E-03
   .1861358E-02   .5028873E-02   .7568469E-02   .8605929E-02   .7693741E-02
   .5028223E-02   .1363452E-02  -.2326625E-02  -.5240751E-02  -.7135768E-02
  -.8361097E-02  -.9538255E-02  -.1117486E-01  -.1332392E-01  -.1550932E-01
  -.1702533E-01  -.1728601E-01  -.1603373E-01  -.1345725E-01  -.1011490E-01
  -.6675303E-02  -.3714262E-02  -.1636980E-02  -.6342263E-03  -.6219217E-03
  -.1301097E-02  -.2318547E-02  -.3264974E-02  -.3688224E-02  -.3249906E-02
  -.1866482E-02   .2620166E-03   .2701485E-02   .4830184E-02   .6032606E-02
   .5872281E-02   .4248409E-02   .1475319E-02  -.1725436E-02  -.4403387E-02
  -.5798199E-02  -.5714686E-02  -.4555964E-02  -.3018887E-02  -.1636475E-02
  -.5591144E-03   .3037765E-03   .1010962E-02   .1453752E-02   .1491998E-02
   .1105480E-02   .3694744E-03  -.5926303E-03  -.1619377E-02  -.2526420E-02
  -.3095952E-02  -.3120017E-02  -.2503484E-02  -.1374047E-02  -.3062234E-04
   .1151855E-02   .1848843E-02   .1902321E-02   .1385649E-02   .5715635E-03
  -.2114743E-03  -.6746213E-03  -.5345858E-03   .4140783E-03   .2262616E-02
   .4984085E-02   .8422176E-02   .1225539E-01   .1612523E-01   .1989046E-01
   .2356665E-01   .2707803E-01   .3012170E-01   .3214215E-01   .3254372E-01
   .3105955E-01   .2791807E-01   .2374097E-01   .1935251E-01   .1550334E-01
   .1257931E-01   .1056552E-01   .9254160E-02   .8391733E-02   .7651545E-02
   .6740629E-02   .5541115E-02   .4050754E-02   .2299954E-02   .3642172E-03
  -.1598244E-02  -.3426288E-02  -.5048722E-02  -.6479937E-02  -.7717376E-02
  -.8591334E-02  -.8720750E-02  -.7831758E-02  -.6035444E-02  -.3833048E-02
  -.1906604E-02  -.7568967E-03  -.4674629E-03  -.7369972E-03  -.1145274E-02
  -.1380324E-02  -.1297369E-02  -.8625555E-03  -.5611849E-04   .9725059E-03
   .1848360E-02   .2113445E-02   .1533882E-02   .2741210E-03  -.1201219E-02
  -.2398404E-02  -.3097414E-02  -.3451320E-02  -.3837356E-02  -.4590170E-02
  -.5815378E-02  -.7351791E-02  -.8967538E-02  -.1057862E-01  -.1223435E-01
  -.1391592E-01  -.1536792E-01  -.1604938E-01  -.1532138E-01  -.1287682E-01
  -.9067273E-02  -.4861736E-02  -.1419623E-02   .3971021E-03   .3242721E-03
  -.1293534E-02  -.3739841E-02  -.6251266E-02  -.8212314E-02  -.9195733E-02
  -.9027160E-02  -.7860621E-02  -.6270063E-02  -.5108402E-02  -.5139378E-02
  -.6579455E-02  -.8914408E-02  -.1119930E-01  -.1251287E-01  -.1230129E-01
  -.1064181E-01  -.8204039E-02  -.5836400E-02  -.4154338E-02  -.3406104E-02
  -.3555064E-02  -.4389975E-02  -.5561893E-02  -.6695668E-02  -.7561875E-02
  -.8025872E-02  -.7951969E-02  -.7220767E-02  -.5847549E-02  -.4133120E-02
  -.2627874E-02  -.1813870E-02  -.1750350E-02  -.2034353E-02  -.2112762E-02
  -.1650906E-02  -.7014427E-03   .3564316E-03   .8930996E-03   .2840280E-03
  -.1755326E-02  -.4932422E-02  -.8444013E-02  -.1125118E-01  -.1248616E-01
  -.1177665E-01  -.9363297E-02  -.5983350E-02  -.2440857E-02   .6204955E-03
   .2829510E-02   .4134579E-02   .4751244E-02   .5098430E-02   .5628533E-02
   .6579092E-02   .7845841E-02   .8959892E-02   .9290528E-02   .8377893E-02
   .6202330E-02   .3289241E-02   .4969069E-03  -.1347873E-02  -.1775201E-02
  -.8276632E-03   .9913952E-03   .2959018E-02   .4475739E-02   .5323578E-02
   .5673413E-02   .5798706E-02   .5896409E-02   .6055987E-02   .6248150E-02
   .6361015E-02   .6295973E-02   .6034352E-02   .5648251E-02   .5403712E-02
   .5674583E-02   .6638095E-02   .8144390E-02   .9761899E-02   .1091050E-01
   .1113639E-01   .1032496E-01   .8692600E-02   .6694419E-02   .4803163E-02
   .3316667E-02   .2231141E-02   .1328346E-02   .4672723E-03  -.3548745E-03
  -.9774331E-03  -.1018026E-02  -.5928378E-04   .2012105E-02   .4797698E-02
   .7490102E-02   .9225756E-02   .9433528E-02   .8142589E-02   .5969625E-02
   .3720092E-02   .2053820E-02   .1347788E-02   .1745968E-02   .3117800E-02
   .4946105E-02   .6379092E-02   .6572957E-02   .5150825E-02   .2442158E-02
  -.6856495E-03  -.3263766E-02  -.4621706E-02  -.4612271E-02  -.3577683E-02
  -.2125431E-02  -.7662715E-03   .3573231E-03   .1402660E-02   .2572416E-02
   .3895714E-02   .5124279E-02   .5813575E-02   .5559683E-02   .4266033E-02
   .2237894E-02   .3306486E-04  -.1671387E-02  -.2260902E-02  -.1472699E-02
   .4599880E-03   .2956164E-02   .5468519E-02   .7850152E-02   .1030920E-01
   .1308362E-01   .1614136E-01   .1901462E-01   .2095172E-01   .2127203E-01
   .1965211E-01   .1627990E-01   .1183944E-01   .7298363E-02   .3506460E-02
   .9212221E-03  -.4868239E-03  -.1285469E-02  -.2374452E-02  -.4495409E-02
  -.7786993E-02  -.1169703E-01  -.1522223E-01  -.1744561E-01  -.1803630E-01
  -.1735761E-01  -.1615923E-01  -.1516518E-01  -.1467964E-01  -.1442721E-01
  -.1381299E-01  -.1228889E-01  -.9554581E-02  -.5639316E-02  -.9718629E-03
   .3625719E-02   .7208146E-02   .9118739E-02   .9175023E-02   .7765388E-02
   .5799888E-02   .4385945E-02   .4428979E-02   .6228930E-02   .9299256E-02
   .1262068E-01   .1514793E-01   .1619469E-01   .1560903E-01   .1372831E-01
   .1125729E-01   .8985745E-02   .7511650E-02   .7165178E-02   .8015429E-02
   .9839779E-02   .1211696E-01   .1410444E-01   .1497732E-01   .1420069E-01
   .1187735E-01   .8737947E-02   .5716029E-02   .3415210E-02   .1849254E-02
   .5984499E-03  -.7817802E-03  -.2433638E-02  -.4135459E-02  -.5480972E-02
  -.6146754E-02  -.6064961E-02  -.5444355E-02  -.4721265E-02  -.4379496E-02
  -.4820605E-02  -.6300428E-02  -.8814957E-02  -.1194310E-01  -.1495313E-01
  -.1708000E-01  -.1782731E-01  -.1718823E-01  -.1569721E-01  -.1418933E-01
  -.1337865E-01  -.1349827E-01  -.1415946E-01  -.1465894E-01  -.1439851E-01
  -.1318314E-01  -.1121706E-01  -.8813327E-02  -.6255205E-02  -.3815184E-02
  -.1665628E-02   .2982956E-03   .2326097E-02   .4499223E-02   .6517488E-02
   .7828453E-02   .7886841E-02   .6396970E-02   .3456977E-02  -.5520519E-03
  -.5104635E-02  -.9657170E-02  -.1368055E-01  -.1663465E-01  -.1804237E-01
  -.1771602E-01  -.1588274E-01  -.1316408E-01  -.1042258E-01  -.8337702E-02
  -.7014435E-02  -.6010417E-02  -.4702911E-02  -.2723823E-02  -.1573261E-03
   .2439487E-02   .4215939E-02   .4349424E-02   .2473058E-02  -.9306238E-03
  -.4615322E-02  -.7065455E-02  -.7178166E-02  -.4776731E-02  -.6670733E-03
   .3781245E-02   .7228741E-02   .8921107E-02   .8965873E-02   .8073827E-02
   .7213376E-02   .7112281E-02   .7869071E-02   .8891117E-02   .9294346E-02
   .8440330E-02   .6250069E-02   .3211539E-02   .8470995E-04  -.2467932E-02
  -.4088391E-02  -.4761687E-02  -.4706349E-02  -.4347513E-02  -.4237999E-02
  -.4872797E-02  -.6431309E-02  -.8722583E-02  -.1126748E-01  -.1345900E-01
  -.1489018E-01  -.1552840E-01  -.1559326E-01  -.1528577E-01  -.1462485E-01
  -.1336686E-01  -.1114769E-01  -.7893591E-02  -.3983581E-02  -.1256858E-03
   .2842059E-02   .4377339E-02   .4519493E-02   .3799487E-02   .2928954E-02
   .2386708E-02   .2272918E-02   .2392116E-02   .2447236E-02   .2224386E-02
   .1639771E-02   .7370364E-03  -.2494363E-03  -.8770844E-03  -.5890213E-03
   .1017305E-02   .3863729E-02   .7330802E-02   .1052375E-01   .1272966E-01
   .1363518E-01   .1331176E-01   .1203022E-01   .1008614E-01   .7773813E-02
   .5336801E-02   .2893361E-02   .4284704E-03  -.2116524E-02  -.4656572E-02
  -.6986239E-02  -.8808909E-02  -.9854094E-02  -.9958485E-02  -.9109169E-02
  -.7515010E-02  -.5585910E-02  -.3783351E-02  -.2417365E-02  -.1560414E-02
  -.1040507E-02  -.5351442E-03   .2881629E-03   .1662336E-02   .3631890E-02
   .5901114E-02   .7817738E-02   .8562733E-02   .7557473E-02   .4994702E-02
   .1933508E-02  -.1861074E-03  -.2193253E-03   .2202257E-02   .6527658E-02
   .1157869E-01   .1604668E-01   .1888494E-01   .1959064E-01   .1832593E-01
   .1581508E-01   .1303385E-01   .1076581E-01   .9330399E-02   .8672667E-02
   .8560540E-02   .8762209E-02   .9088196E-02   .9320250E-02   .9114591E-02
   .8012259E-02   .5739544E-02   .2479011E-02  -.1199971E-02  -.4560121E-02
  -.6924428E-02  -.7855254E-02  -.7241842E-02  -.5329220E-02  -.2648905E-02
   .2098390E-03   .2843064E-02   .5151568E-02   .7273362E-02   .9371751E-02
   .1140422E-01   .1296747E-01   .1341517E-01   .1217099E-01   .9100664E-02
   .4657803E-02  -.2578545E-03  -.4695723E-02  -.7940898E-02  -.9458603E-02
  -.8908074E-02  -.6319815E-02  -.2329792E-02   .1886240E-02   .5060371E-02
   .6302359E-02   .5415140E-02   .2940263E-02  -.1420775E-03  -.2808450E-02
  -.4377928E-02  -.4688048E-02  -.4067574E-02  -.3134103E-02  -.2408121E-02
  -.2041302E-02  -.1781104E-02  -.1168727E-02   .3563668E-04   .1556060E-02
   .2730242E-02   .2870539E-02   .1693394E-02  -.4593621E-03  -.2730040E-02
  -.4270508E-02  -.4639452E-02  -.3732337E-02  -.1583201E-02   .1623934E-02
   .5523746E-02   .9639112E-02   .1340959E-01   .1629274E-01   .1789563E-01
   .1807357E-01   .1702323E-01   .1530380E-01   .1364616E-01   .1264842E-01
   .1259441E-01   .1337943E-01   .1450289E-01   .1521800E-01   .1466908E-01
   .1220045E-01   .7746076E-02   .2042263E-02  -.3555982E-02  -.7579938E-02
  -.9083295E-02  -.8102893E-02  -.5562089E-02  -.2771009E-02  -.9318610E-03
  -.8485417E-03  -.2760070E-02  -.6233578E-02  -.1031070E-01  -.1384248E-01
  -.1586582E-01  -.1595288E-01  -.1436432E-01  -.1189711E-01  -.9630200E-02
  -.8552152E-02  -.9188346E-02  -.1133596E-01  -.1400589E-01  -.1575403E-01
  -.1534053E-01  -.1231658E-01  -.7134880E-02  -.9044378E-03   .4984066E-02
   .9259619E-02   .1109940E-01   .1029046E-01   .7316224E-02   .3252899E-02
  -.6234851E-03  -.3264371E-02  -.4211655E-02  -.3741959E-02  -.2630818E-02
  -.1656761E-02  -.1242239E-02  -.1318755E-02  -.1490183E-02  -.1285671E-02
  -.2934270E-03   .1693454E-02   .4461974E-02   .7318448E-02   .9269110E-02
   .9419991E-02   .7398551E-02   .3620216E-02  -.8399794E-03  -.4600099E-02
  -.6500784E-02  -.6140861E-02  -.4105159E-02  -.1686626E-02  -.2541103E-03
  -.6033460E-03  -.2605136E-02  -.5320155E-02  -.7455352E-02  -.7957627E-02
  -.6463011E-02  -.3543096E-02  -.5532353E-03   .9686771E-03   .4932524E-04
  -.3234861E-02  -.7749641E-02  -.1173132E-01  -.1351194E-01  -.1221744E-01
  -.8111293E-02  -.2384513E-02   .3306349E-02   .7308709E-02   .8468094E-02
   .6589053E-02   .2653525E-02  -.1447714E-02  -.3717878E-02  -.3006932E-02
   .4302080E-03   .5206909E-02   .9671276E-02   .1267415E-01   .1382389E-01
   .1330816E-01   .1161104E-01   .9305325E-02   .6888066E-02   .4695349E-02
   .2885497E-02   .1371641E-02  -.9467035E-04  -.1706897E-02  -.3352885E-02
  -.4556295E-02  -.4789964E-02  -.3841449E-02  -.1908584E-02   .5705286E-03
   .3104105E-02   .5218484E-02   .6558123E-02   .7054950E-02   .6973725E-02
   .6732931E-02   .6513177E-02   .6118983E-02   .5105934E-02   .3118920E-02
   .2598150E-03  -.2844553E-02  -.5351492E-02  -.6628311E-02  -.6577609E-02
  -.5664711E-02  -.4758575E-02  -.4785129E-02  -.6285468E-02  -.9066831E-02
  -.1213491E-01  -.1416207E-01  -.1423447E-01  -.1233587E-01  -.9256161E-02
  -.6094738E-02  -.3729364E-02  -.2474008E-02  -.2090949E-02  -.2089476E-02
  -.2151794E-02  -.2341943E-02  -.2925672E-02  -.4095787E-02  -.5804193E-02
  -.7750489E-02  -.9494040E-02  -.1056267E-01  -.1053232E-01  -.9157683E-02
  -.6662734E-02  -.3816505E-02  -.1630981E-02  -.8781755E-03  -.1694284E-02
  -.3446791E-02  -.5001499E-02  -.5304141E-02  -.3821763E-02  -.7033158E-03
   .3369385E-02   .7561477E-02   .1117963E-01   .1373626E-01   .1497303E-01
   .1487241E-01   .1362731E-01   .1150233E-01   .8731836E-02   .5472339E-02
   .1809993E-02  -.2115629E-02  -.5971128E-02  -.9253878E-02  -.1147398E-01
  -.1226737E-01  -.1135508E-01  -.8572587E-02  -.3987561E-02   .1979571E-02
   .8317129E-02   .1350436E-01   .1608175E-01   .1536738E-01   .1187265E-01
   .7044238E-02   .2530823E-02  -.5550460E-03  -.1873619E-02  -.1679666E-02
  -.5819942E-03   .7191406E-03   .1663107E-02   .2012767E-02   .1904123E-02
   .1738366E-02   .2073092E-02   .3390692E-02   .5711298E-02   .8460772E-02
   .1073555E-01   .1175715E-01   .1124640E-01   .9500492E-02   .7247767E-02
   .5284152E-02   .4230973E-02   .4368408E-02   .5536642E-02   .7161087E-02
   .8516089E-02   .9074307E-02   .8648380E-02   .7365823E-02   .5551114E-02
   .3625713E-02   .1986033E-02   .9309888E-03   .5949237E-03   .9645804E-03
   .1934713E-02   .3229213E-02   .4349486E-02   .4591976E-02   .3208671E-02
  -.2665453E-03  -.5566687E-02  -.1152367E-01  -.1649658E-01  -.1903449E-01
  -.1836822E-01  -.1464661E-01  -.8970597E-02  -.3098828E-02   .1190985E-02
   .2810898E-02   .1745311E-02  -.9811892E-03  -.3803485E-02  -.5339647E-02
  -.4957720E-02  -.2975715E-02  -.3110195E-03   .2085275E-02   .3636544E-02
   .4286553E-02   .4319871E-02   .4070739E-02   .3858658E-02   .3914916E-02
   .4267702E-02   .4768896E-02   .5297160E-02   .5901927E-02   .6698788E-02
   .7656302E-02   .8505294E-02   .8777033E-02   .8017896E-02   .6083261E-02
   .3339898E-02   .5401711E-03  -.1521805E-02  -.2316095E-02  -.1746765E-02
  -.7116062E-04   .2272511E-02   .4815490E-02   .7208734E-02   .9291987E-02
   .1093584E-01   .1186697E-01   .1162629E-01   .9776235E-02   .6168247E-02
   .1105252E-02  -.4541241E-02  -.9507555E-02  -.1257374E-01  -.1300207E-01
  -.1081124E-01  -.6732810E-02  -.1974201E-02   .2085769E-02   .4373367E-02
   .4490142E-02   .2856765E-02   .6260698E-03  -.7826978E-03  -.3574456E-03
   .1961769E-02   .5318778E-02   .8568602E-02   .1088889E-01   .1197127E-01
   .1183480E-01   .1069768E-01   .9055964E-02   .7671199E-02   .7217414E-02
   .7849421E-02   .9106866E-02   .1015686E-01   .1028850E-01   .9333997E-02
   .7602632E-02   .5544728E-02   .3523394E-02   .1779803E-02   .4754910E-03
  -.2569343E-03  -.3771040E-03   .1050523E-03   .1171572E-02   .2689802E-02
   .4358408E-02   .5723911E-02   .6378052E-02   .6087183E-02   .4852086E-02
   .2953802E-02   .9209443E-03  -.6593397E-03  -.1456735E-02  -.1555831E-02
  -.1336237E-02  -.1184469E-02  -.1263461E-02  -.1492623E-02  -.1651902E-02
  -.1570037E-02  -.1247065E-02  -.8763999E-03  -.7711359E-03  -.1181795E-02
  -.2061053E-02  -.2978921E-02  -.3305559E-02  -.2537737E-02  -.5501295E-03
   .2373289E-02   .5663582E-02   .8607516E-02   .1053514E-01   .1102088E-01
   .1008623E-01   .8325686E-02   .6845963E-02   .6734889E-02   .8293077E-02
   .1074912E-01   .1278147E-01   .1326210E-01   .1178093E-01   .8770638E-02
   .5292921E-02   .2522073E-02   .1141754E-02   .9756502E-03   .1084670E-02
   .3542284E-03  -.1775525E-02  -.4943924E-02  -.8053277E-02  -.9857235E-02
  -.9510956E-02  -.6932353E-02  -.2886058E-02   .1183206E-02   .3487512E-02
   .2591969E-02  -.1818435E-02  -.8599632E-02  -.1546198E-01  -.1994532E-01
  -.2056830E-01  -.1739204E-01  -.1172817E-01  -.5417281E-02  -.1092084E-03
   .3158679E-02   .4085880E-02   .3074691E-02   .1155479E-02  -.3242541E-03
  -.3964712E-03   .1032569E-02   .3272427E-02   .5240509E-02   .6028928E-02
   .5363299E-02   .3600609E-02   .1445194E-02  -.3860593E-03  -.1414101E-02
  -.1574623E-02  -.1239645E-02  -.9931862E-03  -.1258817E-02  -.2055105E-02
  -.2958728E-02  -.3323859E-02  -.2661950E-02  -.9974183E-03   .1072288E-02
   .2735252E-02   .3340359E-02   .2667153E-02   .9947396E-03  -.1011454E-02
  -.2530533E-02  -.2839684E-02  -.1568315E-02   .1150974E-02   .4712742E-02
   .8138102E-02   .1034552E-01   .1064605E-01   .9057833E-02   .6284283E-02
   .3366116E-02   .1040023E-02  -.5319125E-03  -.1559723E-02  -.2189562E-02
  -.2218973E-02  -.1237961E-02   .1043299E-02   .4492606E-02   .8676864E-02
   .1309285E-01   .1718119E-01   .2022039E-01   .2144445E-01   .2034833E-01
   .1715616E-01   .1296871E-01   .9243656E-02   .7006757E-02   .6314965E-02
   .6390425E-02   .6223517E-02   .5142261E-02   .2972140E-02  -.4780086E-04
  -.3363229E-02  -.6261848E-02  -.8072912E-02  -.8574224E-02  -.8201440E-02
  -.7763348E-02  -.7831243E-02  -.8301477E-02  -.8524685E-02  -.7899062E-02
  -.6414329E-02  -.4653956E-02  -.3337724E-02  -.2929822E-02  -.3584922E-02
  -.5197581E-02  -.7523464E-02  -.1024019E-01  -.1294093E-01  -.1512742E-01
  -.1629455E-01  -.1608391E-01  -.1453267E-01  -.1223687E-01  -.1023782E-01
  -.9558567E-02  -.1064560E-01  -.1307884E-01  -.1573484E-01  -.1735149E-01
  -.1709104E-01  -.1487262E-01  -.1150829E-01  -.8324410E-02  -.6469210E-02
  -.6462765E-02  -.8056208E-02  -.1047430E-01  -.1279456E-01  -.1427985E-01
  -.1463044E-01  -.1412467E-01  -.1334671E-01  -.1280239E-01  -.1267611E-01
  -.1283177E-01  -.1299664E-01  -.1281497E-01  -.1198674E-01  -.1044362E-01
  -.8383247E-02  -.6271510E-02  -.4602225E-02  -.3592207E-02  -.3150914E-02
  -.3012804E-02  -.2953136E-02  -.2837965E-02  -.2551768E-02  -.1960002E-02
  -.9655269E-03   .3810842E-03   .1850562E-02   .3103339E-02   .3837503E-02
   .3877754E-02   .3223407E-02   .2012770E-02   .4626850E-03  -.9694128E-03
  -.1548987E-02  -.6347051E-03   .1832106E-02   .5131204E-02   .8051428E-02
   .9396594E-02   .8503887E-02   .5538095E-02   .1353515E-02  -.2884063E-02
  -.6096212E-02  -.7569388E-02  -.7103259E-02  -.5052285E-02  -.2253673E-02
   .3311156E-03   .2055473E-02   .2645291E-02   .2078959E-02   .5350721E-03
  -.1683929E-02  -.4274709E-02  -.6990773E-02  -.9526248E-02  -.1145471E-01
  -.1230531E-01  -.1176838E-01  -.9911767E-02  -.7246221E-02  -.4589508E-02
  -.2760592E-02  -.2271514E-02  -.3139354E-02  -.5000092E-02  -.7380403E-02
  -.9861310E-02  -.1207892E-01  -.1370398E-01  -.1448539E-01  -.1426017E-01
  -.1299255E-01  -.1080624E-01  -.8014382E-02  -.5056893E-02  -.2357758E-02
  -.1900593E-03   .1329452E-02   .2204395E-02   .2514274E-02   .2343482E-02
   .1731622E-02   .5829682E-03  -.1337873E-02  -.4294155E-02  -.8336392E-02
  -.1314066E-01  -.1802368E-01  -.2213214E-01  -.2470168E-01  -.2523188E-01
  -.2375689E-01  -.2095492E-01  -.1788854E-01  -.1546163E-01  -.1402087E-01
  -.1322453E-01  -.1227742E-01  -.1039040E-01  -.7176889E-02  -.2876536E-02
   .1673870E-02   .5276985E-02   .6761336E-02   .5562221E-02   .2186054E-02
  -.1873956E-02  -.4666705E-02  -.4585292E-02  -.1113405E-02   .4844150E-02
   .1135346E-01   .1619274E-01   .1768505E-01   .1531767E-01   .9941589E-02
   .3428646E-02  -.2114929E-02  -.5184659E-02  -.5392939E-02  -.3302249E-02
   .6485310E-04   .3581969E-02   .6266875E-02   .7443522E-02   .6866029E-02
   .4791463E-02   .1913419E-02  -.8891386E-03  -.2902430E-02  -.3879040E-02
  -.3957745E-02  -.3410980E-02  -.2482515E-02  -.1402798E-02  -.4231480E-03
   .3033919E-03   .8081132E-03   .1224974E-02   .1679972E-02   .2193823E-02
   .2642670E-02   .2876040E-02   .2782760E-02   .2337600E-02   .1640324E-02
   .9110245E-03   .3772767E-03   .1628173E-03   .1864268E-03   .2165651E-03
   .2323140E-04  -.5798337E-03  -.1690086E-02  -.3270287E-02  -.5058501E-02
  -.6561801E-02  -.7243356E-02  -.6931342E-02  -.5924446E-02  -.4802179E-02
  -.4138272E-02  -.4224326E-02  -.4940237E-02  -.5770572E-02  -.5904728E-02
  -.4613874E-02  -.1593834E-02   .2855493E-02   .7792311E-02   .1185756E-01
   .1376732E-01   .1287971E-01   .9535283E-02   .4856653E-02   .1916250E-03
  -.3358846E-02  -.5153661E-02  -.4991295E-02  -.3120173E-02  -.2591148E-03
   .2525153E-02   .4224248E-02   .4359890E-02   .3169687E-02   .1457113E-02
   .2131807E-03   .2011164E-03   .1611283E-02   .4020066E-02   .6715548E-02
   .9015162E-02   .1047745E-01   .1093326E-01   .1036985E-01   .8903906E-02
   .6700330E-02   .3786155E-02   .1598774E-03  -.3826107E-02  -.7178941E-02
  -.8606460E-02  -.7286445E-02  -.3498978E-02   .1366629E-02   .5536325E-02
   .7831440E-02   .8227790E-02   .7671951E-02   .7371428E-02   .8167220E-02
   .1026906E-01   .1322947E-01   .1610649E-01   .1777509E-01   .1752152E-01
   .1548121E-01   .1259065E-01   .1016764E-01   .9263788E-02   .1017702E-01
   .1247364E-01   .1527300E-01   .1761767E-01   .1887946E-01   .1897425E-01
   .1839104E-01   .1804478E-01   .1884963E-01   .2127441E-01   .2512406E-01
   .2961062E-01   .3370894E-01   .3648413E-01   .3725679E-01   .3570417E-01
   .3199370E-01   .2684845E-01   .2140227E-01   .1686110E-01   .1409592E-01
   .1334199E-01   .1415483E-01   .1554295E-01   .1636012E-01   .1575344E-01
   .1338796E-01   .9532954E-02   .5119257E-02   .1403528E-02  -.6124855E-03
  -.5863088E-03   .1020871E-02   .3181625E-02   .4881424E-02   .5514464E-02
   .4954828E-02   .3452542E-02   .1454227E-02  -.6053702E-03  -.2450157E-02
  -.3946892E-02  -.5022044E-02  -.5452390E-02  -.4959943E-02  -.3518336E-02
  -.1522056E-02   .2035575E-03   .6996569E-03  -.6538161E-03  -.3674049E-02
  -.7450159E-02  -.1087247E-01  -.1309187E-01  -.1370827E-01  -.1273463E-01
  -.1049951E-01  -.7533289E-02  -.4534135E-02  -.2404156E-02  -.2072015E-02
  -.3989639E-02  -.7746572E-02  -.1216078E-01  -.1581779E-01  -.1772465E-01
  -.1774443E-01  -.1654344E-01  -.1506404E-01  -.1404354E-01  -.1381528E-01
  -.1431402E-01  -.1514581E-01  -.1580432E-01  -.1585403E-01  -.1499931E-01
  -.1309352E-01  -.1011009E-01  -.6154343E-02  -.1608454E-02   .2809127E-02
   .6176073E-02   .7773161E-02   .7508614E-02   .5929994E-02   .3891966E-02
   .2132286E-02   .1142513E-02   .1244620E-02   .2602434E-02   .5016134E-02
   .7841606E-02   .1025890E-01   .1168433E-01   .1199724E-01   .1147173E-01
   .1056467E-01   .9713878E-02   .9161072E-02   .8855641E-02   .8446091E-02
   .7410699E-02   .5231483E-02   .1733080E-02  -.2582285E-02  -.6583305E-02
  -.8982074E-02  -.9032414E-02  -.7010256E-02  -.4101083E-02  -.1758478E-02
  -.1142680E-02  -.2753671E-02  -.6264227E-02  -.1047126E-01  -.1367175E-01
  -.1457103E-01  -.1295307E-01  -.9610709E-02  -.5725567E-02  -.2283672E-02
   .1822366E-03   .1482819E-02   .1521722E-02   .3621924E-03  -.1518030E-02
  -.3294193E-02  -.4268394E-02  -.4315604E-02  -.3925044E-02  -.3903603E-02
  -.4861229E-02  -.6810516E-02  -.9181977E-02  -.1110701E-01  -.1176216E-01
  -.1062884E-01  -.7654605E-02  -.3311632E-02   .1473139E-02   .5692202E-02
   .8714136E-02   .1041070E-01   .1102305E-01   .1096742E-01   .1075654E-01
   .1091130E-01   .1183753E-01   .1353045E-01   .1538469E-01   .1646398E-01
   .1598754E-01   .1378531E-01   .1048304E-01   .7047874E-02   .4252233E-02
   .2454766E-02   .1588826E-02   .1286719E-02   .1144665E-02   .8702234E-03
   .4100434E-03   .1486555E-04   .1573299E-03   .1262208E-02   .3282697E-02
   .5384371E-02   .6265211E-02   .5020717E-02   .1901808E-02  -.1648076E-02
  -.3734055E-02  -.3018956E-02   .6688152E-03   .6273068E-02   .1205815E-01
   .1636137E-01   .1812029E-01   .1715624E-01   .1417942E-01   .1051551E-01
   .7543536E-02   .6127264E-02   .6336155E-02   .7565068E-02   .9006071E-02
   .1015334E-01   .1090909E-01   .1133512E-01   .1134654E-01   .1064395E-01
   .8954532E-02   .6270636E-02   .2845212E-02  -.9061774E-03  -.4440388E-02
  -.7240341E-02  -.9005240E-02  -.9728716E-02  -.9562815E-02  -.8624885E-02
  -.6971236E-02  -.4696573E-02  -.1975601E-02   .9551695E-03   .3969454E-02
   .7016123E-02   .9826750E-02   .1185732E-01   .1255267E-01   .1178079E-01
   .1003958E-01   .8262952E-02   .7336962E-02   .7626112E-02   .8807616E-02
   .1012841E-01   .1084895E-01   .1058378E-01   .9470054E-02   .8022902E-02
   .6845710E-02   .6443464E-02   .7045863E-02   .8377356E-02   .9644609E-02
   .9798609E-02   .8046918E-02   .4361072E-02  -.3278474E-03  -.4512528E-02
  -.6845090E-02  -.6777397E-02  -.4742566E-02  -.1822979E-02   .8493338E-03
   .2427399E-02   .2365801E-02   .4503736E-03  -.3095510E-02  -.7600359E-02
  -.1211518E-01  -.1564312E-01  -.1742862E-01  -.1724683E-01  -.1558784E-01
  -.1348524E-01  -.1209939E-01  -.1219891E-01  -.1377716E-01  -.1610084E-01
  -.1806144E-01  -.1867708E-01  -.1751277E-01  -.1485470E-01  -.1155683E-01
  -.8620527E-02  -.6761783E-02  -.6179911E-02  -.6583825E-02  -.7390228E-02
  -.7967928E-02  -.7800225E-02  -.6543479E-02  -.4149721E-02  -.9124337E-03
   .2574056E-02   .5496850E-02   .7014123E-02   .6641904E-02   .4613006E-02
   .1871351E-02  -.2829589E-03  -.7307046E-03   .1012044E-02   .4667921E-02
   .9222230E-02   .1320366E-01   .1524454E-01   .1462759E-01   .1158284E-01
   .7190476E-02   .2917316E-02  -.5840684E-04  -.1327849E-02  -.1306506E-02
  -.9716791E-03  -.1282903E-02  -.2771503E-02  -.5377221E-02  -.8493453E-02
  -.1119167E-01  -.1259637E-01  -.1238408E-01  -.1106654E-01  -.9796408E-02
  -.9730674E-02  -.1138220E-01  -.1442464E-01  -.1796511E-01  -.2091075E-01
  -.2239067E-01  -.2211495E-01  -.2044446E-01  -.1811449E-01  -.1585928E-01
  -.1422448E-01  -.1348636E-01  -.1364347E-01  -.1443281E-01  -.1527558E-01
  -.1535054E-01  -.1394550E-01  -.1096737E-01  -.7058555E-02  -.3200624E-02
  -.1151586E-03   .1938244E-02   .3056310E-02   .3463353E-02   .3376714E-02
   .2988568E-02   .2446298E-02   .1776150E-02   .9417912E-03  -.6259943E-04
  -.1183405E-02  -.2308473E-02  -.3345257E-02  -.4272216E-02  -.5093514E-02
  -.5759983E-02  -.6163779E-02  -.6230463E-02  -.5994766E-02  -.5551430E-02
  -.4993729E-02  -.4438118E-02  -.3999202E-02  -.3696435E-02  -.3343894E-02
  -.2600094E-02  -.1250953E-02   .4989181E-03   .1967208E-02   .2350931E-02
   .1325957E-02  -.6658741E-03  -.2599848E-02  -.3382373E-02  -.2347284E-02
   .4793415E-03   .4328239E-02   .7981088E-02   .1032039E-01   .1083541E-01
   .9746083E-02   .7788866E-02   .5780013E-02   .4219416E-02   .3218727E-02
   .2796159E-02   .2993409E-02   .3751805E-02   .4848481E-02   .6060049E-02
   .7418866E-02   .9180131E-02   .1149066E-01   .1405901E-01   .1616588E-01
   .1697222E-01   .1598650E-01   .1339328E-01   .9983205E-02   .6707256E-02
   .4273287E-02   .3032332E-02   .3077460E-02   .4351929E-02   .6611640E-02
   .9348278E-02   .1174188E-01   .1288865E-01   .1230228E-01   .1021210E-01
   .7472600E-02   .5090347E-02   .3694610E-02   .3300152E-02   .3404135E-02
   .3372571E-02   .2731081E-02   .1327118E-02  -.6462594E-03  -.2665384E-02
  -.4005563E-02  -.4088746E-02  -.2735485E-02  -.2723861E-03   .2562116E-02
   .4941898E-02   .6234207E-02   .6148795E-02   .4961864E-02   .3504612E-02
   .2692997E-02   .2959714E-02   .4131476E-02   .5654268E-02   .6859135E-02
   .7322923E-02   .7085844E-02   .6617721E-02   .6544319E-02   .7371083E-02
   .9355390E-02   .1232486E-01   .1560864E-01   .1822019E-01   .1930115E-01
   .1849131E-01   .1612468E-01   .1305697E-01   .1031075E-01   .8731897E-02
   .8597522E-02   .9482848E-02   .1049047E-01   .1067520E-01   .9557129E-02
   .7348607E-02   .4814443E-02   .2789514E-02   .1798316E-02   .1908003E-02
   .2619065E-02   .3104402E-02   .2646294E-02   .1025653E-02  -.1362896E-02
  -.3695171E-02  -.5087350E-02  -.4954328E-02  -.3312780E-02  -.7633884E-03
   .1819343E-02   .3645792E-02   .4478733E-02   .4758826E-02   .5206802E-02
   .6219603E-02   .7561975E-02   .8598149E-02   .8812932E-02   .8065792E-02
   .6505156E-02   .4403799E-02   .2243095E-02   .7800150E-03   .7009236E-03
   .2134246E-02   .4396219E-02   .6269313E-02   .6684116E-02   .5300419E-02
   .2529115E-02  -.9150661E-03  -.4401629E-02  -.7426656E-02  -.9550642E-02
  -.1046847E-01  -.1015646E-01  -.8932543E-02  -.7325079E-02  -.5831862E-02
  -.4855892E-02  -.4716531E-02  -.5558648E-02  -.7308939E-02  -.9664530E-02
  -.1221211E-01  -.1461113E-01  -.1653679E-01  -.1767302E-01  -.1782466E-01
  -.1700551E-01  -.1544995E-01  -.1362985E-01  -.1214577E-01  -.1149934E-01
  -.1190624E-01  -.1315023E-01  -.1475584E-01  -.1640253E-01  -.1811048E-01
  -.2007587E-01  -.2232660E-01  -.2451753E-01  -.2603847E-01  -.2633159E-01
  -.2516135E-01  -.2267609E-01  -.1940199E-01  -.1612369E-01  -.1358555E-01
  -.1214763E-01  -.1160403E-01  -.1131559E-01  -.1049017E-01  -.8653067E-02
  -.5918884E-02  -.2905556E-02  -.4909463E-03   .6778014E-03   .5809782E-03
  -.2054956E-03  -.8824721E-03  -.8503253E-03   .9077244E-04   .1751007E-02
   .3662544E-02   .5209928E-02   .5867104E-02   .5456429E-02   .4185820E-02
   .2405757E-02   .4196054E-03  -.1607599E-02  -.3673685E-02  -.5796125E-02
  -.7844084E-02  -.9518701E-02  -.1039827E-01  -.1003925E-01  -.8263372E-02
  -.5404934E-02  -.2344797E-02  -.2818275E-03  -.1651238E-03  -.2084905E-02
  -.5071007E-02  -.7562235E-02  -.8136643E-02  -.6144660E-02  -.1965820E-02
   .3324939E-02   .8503384E-02   .1260422E-01   .1511949E-01   .1601103E-01
   .1552755E-01   .1405482E-01   .1203519E-01   .9913106E-02   .8136863E-02
   .7136544E-02   .7157946E-02   .8123286E-02   .9598355E-02   .1093796E-01
   .1150648E-01   .1084827E-01   .8751408E-02   .5245576E-02   .6653166E-03
  -.4294196E-02  -.8769374E-02  -.1206058E-01  -.1384840E-01  -.1419894E-01
  -.1350934E-01  -.1235434E-01  -.1128884E-01  -.1063136E-01  -.1033514E-01
  -.1003779E-01  -.9236514E-02  -.7613853E-02  -.5268523E-02  -.2677359E-02
  -.4474130E-03   .9831855E-03   .1599165E-02   .1902094E-02   .2704730E-02
   .4718990E-02   .8145808E-02   .1243728E-01   .1647020E-01   .1904136E-01
   .1934612E-01   .1734940E-01   .1380876E-01   .9939120E-02   .6821841E-02
   .4961848E-02   .4214564E-02   .4033845E-02   .3863328E-02   .3448413E-02
   .2848933E-02   .2307044E-02   .2113135E-02   .2369201E-02   .2859507E-02
   .3162513E-02   .2893782E-02   .1936376E-02   .5996497E-03  -.5597623E-03
  -.1019488E-02  -.5193433E-03   .7742508E-03   .2397540E-02   .3801590E-02
   .4480013E-02   .4041039E-02   .2283692E-02  -.6325892E-03  -.4097587E-02
  -.7213883E-02  -.9119142E-02  -.9267585E-02  -.7540646E-02  -.4248832E-02
  -.9801127E-04   .3942110E-02   .6889774E-02   .8107755E-02   .7547704E-02
   .5724707E-02   .3467044E-02   .1570882E-02   .5425960E-03   .5117149E-03
   .1308298E-02   .2570595E-02   .3846339E-02   .4733093E-02   .4981407E-02
   .4643227E-02   .4113728E-02   .3859711E-02   .4122053E-02   .4842925E-02
   .5803837E-02   .6786552E-02   .7751993E-02   .8777151E-02   .9742643E-02
   .1038313E-01   .1051025E-01   .1004260E-01   .8960818E-02   .7289653E-02
   .5099677E-02   .2530870E-02  -.1688670E-03  -.2568870E-02  -.4064596E-02
  -.4049913E-02  -.2326833E-02   .5392298E-03   .3329149E-02   .4893636E-02
   .4877286E-02   .3899721E-02   .3031528E-02   .3132137E-02   .4520248E-02
   .6974214E-02   .9882769E-02   .1229114E-01   .1302838E-01   .1122135E-01
   .6921628E-02   .1337941E-02  -.3629328E-02  -.6425605E-02  -.6661604E-02
  -.5109852E-02  -.3038059E-02  -.1539096E-02  -.1268763E-02  -.2471715E-02
  -.5011026E-02  -.8371398E-02  -.1163145E-01  -.1364369E-01  -.1357472E-01
  -.1134159E-01  -.7696032E-02  -.3968818E-02  -.1546729E-02  -.1210320E-02
  -.2715721E-02  -.4869040E-02  -.6129297E-02  -.5427045E-02  -.2703189E-02
   .1164618E-02   .4881521E-02   .7436242E-02   .8553963E-02   .8657796E-02
   .8455736E-02   .8587071E-02   .9553403E-02   .1164199E-01   .1479561E-01
   .1847678E-01   .2172734E-01   .2349394E-01   .2307263E-01   .2051792E-01
   .1668676E-01   .1281564E-01   .9880046E-02   .8172762E-02   .7282360E-02
   .6342059E-02   .4529340E-02   .1555320E-02  -.2249434E-02  -.6142816E-02
  -.9198302E-02  -.1067028E-01  -.1024589E-01  -.8117090E-02  -.5003064E-02
  -.1972707E-02   .2184865E-04   .5980000E-03  -.9085111E-05  -.1281426E-02
  -.2802455E-02  -.4359359E-02  -.5785344E-02  -.6842336E-02  -.7319650E-02
  -.7242656E-02  -.6930604E-02  -.6713858E-02  -.6665826E-02  -.6540133E-02
  -.6013901E-02  -.5098986E-02  -.4203151E-02  -.3865039E-02  -.4478252E-02
  -.6083508E-02  -.8319861E-02  -.1067996E-01  -.1276405E-01  -.1435631E-01
  -.1534503E-01  -.1560678E-01  -.1501212E-01  -.1357795E-01  -.1154854E-01
  -.9379655E-02  -.7556003E-02  -.6318042E-02  -.5550129E-02  -.4917915E-02
  -.4068940E-02  -.2738964E-02  -.8068594E-03   .1621964E-02   .4063129E-02
   .5670482E-02   .5595464E-02   .3383958E-02  -.6779208E-03  -.5563848E-02
  -.9864294E-02  -.1242742E-01  -.1283769E-01  -.1155321E-01  -.9766237E-02
  -.8782332E-02  -.9255273E-02  -.1090108E-01  -.1287131E-01  -.1437784E-01
  -.1504014E-01  -.1489065E-01  -.1418241E-01  -.1316738E-01  -.1204237E-01
  -.1094402E-01  -.9898919E-02  -.8748356E-02  -.7162031E-02  -.4917935E-02
  -.2142246E-02   .6862150E-03   .2939947E-02   .4072770E-02   .3815238E-02
   .2289378E-02  -.5371294E-04  -.2632447E-02  -.4968985E-02  -.6945479E-02
  -.8803214E-02  -.1078590E-01  -.1282663E-01  -.1442989E-01  -.1499648E-01
  -.1433576E-01  -.1288063E-01  -.1151580E-01  -.1094794E-01  -.1124261E-01
  -.1195463E-01  -.1259632E-01  -.1293443E-01  -.1295066E-01  -.1276788E-01
  -.1261668E-01  -.1269618E-01  -.1308337E-01  -.1372981E-01  -.1444640E-01
  -.1502323E-01  -.1535152E-01  -.1540140E-01  -.1509068E-01  -.1426074E-01
  -.1283265E-01  -.1094124E-01  -.8969141E-02  -.7411952E-02  -.6571382E-02
  -.6314569E-02  -.6112300E-02  -.5319628E-02  -.3581034E-02  -.1005068E-02
   .1883626E-02   .4379782E-02   .5922453E-02   .6238962E-02   .5320978E-02
   .3325475E-02   .5792336E-03  -.2426607E-02  -.5208255E-02  -.7355994E-02
  -.8562977E-02  -.8640608E-02  -.7556935E-02  -.5538481E-02  -.2982512E-02
  -.2912927E-03   .2320530E-02   .4769385E-02   .6817584E-02   .8024299E-02
   .7942631E-02   .6380742E-02   .3521693E-02  -.1185100E-03  -.3832516E-02
  -.6951055E-02  -.8975335E-02  -.9696147E-02  -.9383336E-02  -.8680473E-02
  -.8346178E-02  -.8962866E-02  -.1054157E-01  -.1237529E-01  -.1340836E-01
  -.1280804E-01  -.1039314E-01  -.6726342E-02  -.2878902E-02  -.5172204E-04
   .7789057E-03  -.6710004E-03  -.3624434E-02  -.6375957E-02  -.7035045E-02
  -.4565499E-02   .5799823E-03   .6756925E-02   .1197178E-01   .1468284E-01
   .1428286E-01   .1119790E-01   .6808088E-02   .2924061E-02   .1020546E-02
   .1677963E-02   .4398787E-02   .7953608E-02   .1108441E-01   .1300521E-01
   .1351437E-01   .1280061E-01   .1125467E-01   .9352111E-02   .7693980E-02
   .6945117E-02   .7501110E-02   .9130856E-02   .1102458E-01   .1217376E-01
   .1190510E-01   .1030153E-01   .8124741E-02   .6329540E-02   .5593849E-02
   .6070783E-02   .7377349E-02   .8904570E-02   .1012161E-01   .1064767E-01
   .1030817E-01   .9307613E-02   .8234365E-02   .7769926E-02   .8308196E-02
   .9828440E-02   .1188612E-01   .1365265E-01   .1423549E-01   .1319955E-01
   .1086099E-01   .8184188E-02   .6333769E-02   .6038231E-02   .7187439E-02
   .8844164E-02   .9775687E-02   .9161715E-02   .6929963E-02   .3697805E-02
   .4549987E-03  -.1790606E-02  -.2351793E-02  -.1064728E-02   .1642113E-02
   .4778232E-02   .7080253E-02   .7546266E-02   .5976354E-02   .3077719E-02
   .1326378E-03  -.1680109E-02  -.1928578E-02  -.9582209E-03   .4650192E-03
   .1585036E-02   .1988695E-02   .1647915E-02   .6966404E-03  -.6983852E-03
  -.2335792E-02  -.4001709E-02  -.5412829E-02  -.6176736E-02  -.6030157E-02
  -.5040227E-02  -.3601799E-02  -.2294153E-02  -.1680928E-02  -.2112440E-02
  -.3620361E-02  -.5975968E-02  -.8700633E-02  -.1114255E-01  -.1262825E-01
  -.1271534E-01  -.1145408E-01  -.9340229E-02  -.7008824E-02  -.5012816E-02
  -.3842499E-02  -.3846540E-02  -.5001841E-02  -.6761280E-02  -.8292039E-02
  -.8960708E-02  -.8615517E-02  -.7638420E-02  -.6623138E-02  -.6038047E-02
  -.6221461E-02  -.7374267E-02  -.9440056E-02  -.1197304E-01  -.1418922E-01
  -.1543041E-01  -.1552656E-01  -.1471554E-01  -.1342821E-01  -.1211646E-01
  -.1104793E-01  -.1007551E-01  -.8762906E-02  -.6839270E-02  -.4473618E-02
  -.2204684E-02  -.6310131E-03  -.1028712E-03  -.6826141E-03  -.2150589E-02
  -.4032238E-02  -.5596186E-02  -.6067900E-02  -.5122079E-02  -.3102051E-02
  -.7623121E-03   .1101714E-02   .1990153E-02   .1796349E-02   .6934158E-03
  -.8640502E-03  -.2179235E-02  -.2571997E-02  -.1715269E-02   .1175606E-03
   .2269800E-02   .4140271E-02   .5385180E-02   .5844327E-02   .5418488E-02
   .4129052E-02   .2202211E-02   .3958008E-04  -.1969797E-02  -.3633731E-02
  -.4971830E-02  -.6041610E-02  -.6771468E-02  -.6989076E-02  -.6573407E-02
  -.5712956E-02  -.4875445E-02  -.4475767E-02  -.4605376E-02  -.5111085E-02
  -.5912329E-02  -.7300623E-02  -.9768881E-02  -.1337877E-01  -.1733852E-01
  -.2020435E-01  -.2049846E-01  -.1736846E-01  -.1102428E-01  -.2871873E-02
   .4923127E-02   .1034851E-01   .1244242E-01   .1167858E-01   .9530549E-02
   .7604780E-02   .6932328E-02   .7693687E-02   .9363477E-02   .1112741E-01
   .1224017E-01   .1219974E-01   .1085357E-01   .8474412E-02   .5681318E-02
   .3233230E-02   .1832064E-02   .1897733E-02   .3369202E-02   .5621759E-02
   .7756000E-02   .9168115E-02   .9867527E-02   .1042831E-01   .1162200E-01
   .1386839E-01   .1690538E-01   .1993841E-01   .2201528E-01   .2233788E-01
   .2046390E-01   .1651064E-01   .1132592E-01   .6339804E-02   .2949406E-02
   .1855167E-02   .2758289E-02   .4482727E-02   .5438495E-02   .4365642E-02
   .9294465E-03  -.4174096E-02  -.9575919E-02  -.1375741E-01  -.1570073E-01
  -.1539233E-01  -.1377889E-01  -.1223131E-01  -.1182229E-01  -.1284748E-01
  -.1481681E-01  -.1696431E-01  -.1878252E-01  -.2019023E-01  -.2131814E-01
  -.2219433E-01  -.2260938E-01  -.2229256E-01  -.2118551E-01  -.1951280E-01
  -.1766829E-01  -.1610096E-01  -.1515064E-01  -.1503116E-01  -.1589039E-01
  -.1769012E-01  -.2007081E-01  -.2226861E-01  -.2333931E-01  -.2264291E-01
  -.2008529E-01  -.1614169E-01  -.1163967E-01  -.7541184E-02  -.4788788E-02
  -.4011882E-02  -.5186154E-02  -.7565699E-02  -.9928876E-02  -.1111926E-01
  -.1053090E-01  -.8342798E-02  -.5365259E-02  -.2678002E-02  -.1212772E-02
  -.1380859E-02  -.2859475E-02  -.4662420E-02  -.5574636E-02  -.4750160E-02
  -.2097585E-02   .1787024E-02   .5953588E-02   .9408546E-02   .1126814E-01
   .1104137E-01   .9021239E-02   .6368652E-02   .4547728E-02   .4523246E-02
   .6318278E-02   .9031022E-02   .1123283E-01   .1168868E-01   .9949843E-02
   .6534013E-02   .2612814E-02  -.5119039E-03  -.1858291E-02  -.9054849E-03
   .2388891E-02   .7453315E-02   .1303015E-01   .1754066E-01   .1981769E-01
   .1963474E-01   .1768806E-01   .1504273E-01   .1250290E-01   .1048874E-01
   .9192711E-02   .8774030E-02   .9403280E-02   .1109473E-01   .1353384E-01
   .1603632E-01   .1769254E-01   .1774193E-01   .1586823E-01   .1216758E-01
   .7065030E-02   .1234076E-02  -.4560779E-02  -.9627692E-02  -.1345809E-01
  -.1573441E-01  -.1628237E-01  -.1527169E-01  -.1327925E-01  -.1103481E-01
  -.9142799E-02  -.7833556E-02  -.6946815E-02  -.6214620E-02  -.5511704E-02
  -.4824074E-02  -.4089946E-02  -.3196041E-02  -.2107055E-02  -.9902636E-03
  -.1111211E-03   .4652963E-03   .1035048E-02   .2025208E-02   .3599767E-02
   .5420861E-02   .6850026E-02   .7455471E-02   .7314332E-02   .6891689E-02
   .6733867E-02   .7227021E-02   .8422791E-02   .1008928E-01   .1177345E-01
   .1284069E-01   .1261105E-01   .1069840E-01   .7327304E-02   .3216150E-02
  -.7051148E-03  -.3653171E-02  -.5372810E-02  -.6139806E-02  -.6409512E-02
  -.6514386E-02  -.6661022E-02  -.6988767E-02  -.7529414E-02  -.8177996E-02
  -.8724289E-02  -.8996320E-02  -.9027665E-02  -.9016739E-02  -.9082413E-02
  -.9036329E-02  -.8377188E-02  -.6677714E-02  -.4119345E-02  -.1653995E-02
  -.5682418E-03  -.1769224E-02  -.5238215E-02  -.9930197E-02  -.1413207E-01
  -.1616499E-01  -.1507237E-01  -.1107007E-01  -.5441364E-02   .1182231E-04
   .3597623E-02   .4221261E-02   .1619227E-02  -.3531366E-02  -.9715456E-02
  -.1506683E-01  -.1814073E-01  -.1850186E-01  -.1673719E-01  -.1400981E-01
  -.1146150E-01  -.9848874E-02  -.9465365E-02  -.1012647E-01  -.1119787E-01
  -.1190060E-01  -.1175395E-01  -.1074457E-01  -.9156562E-02  -.7299314E-02
  -.5245191E-02  -.2883286E-02  -.3280775E-03   .1890624E-02   .3057185E-02
   .2751980E-02   .9919046E-03  -.1931204E-02  -.5581870E-02  -.9336070E-02
  -.1238369E-01  -.1393494E-01  -.1361860E-01  -.1174524E-01  -.9057102E-02
  -.6271413E-02  -.3781337E-02  -.1667811E-02   .6920777E-04   .1284118E-02
   .1651818E-02   .9323318E-03  -.7596281E-03  -.2866361E-02  -.4533658E-02
  -.4904369E-02  -.3524288E-02  -.7359378E-03   .2416876E-02   .4801811E-02
   .5800166E-02   .5446971E-02   .4223769E-02   .2649830E-02   .1083333E-02
  -.2250737E-03  -.1144480E-02  -.1769631E-02  -.2314434E-02  -.2844817E-02
  -.3179442E-02  -.3024184E-02  -.2246054E-02  -.1071441E-02   .4386956E-04
   .7322215E-03   .9435819E-03   .9473868E-03   .1071797E-02   .1613491E-02
   .2919157E-02   .5202781E-02   .8244886E-02   .1134326E-01   .1374176E-01
   .1508795E-01   .1542829E-01   .1496077E-01   .1388142E-01   .1242387E-01
   .1093553E-01   .9761080E-02   .8950446E-02   .8162853E-02   .6976989E-02
   .5299980E-02   .3400782E-02   .1669318E-02   .2747705E-03  -.9307860E-03
  -.2216081E-02  -.3693757E-02  -.5265031E-02  -.6908977E-02  -.8694842E-02
  -.1039024E-01  -.1124049E-01  -.1031912E-01  -.7297901E-02  -.2923153E-02
   .1279344E-02   .3827100E-02   .3985443E-02   .2033509E-02  -.9816723E-03
  -.3908159E-02  -.6082641E-02  -.7496704E-02  -.8568857E-02  -.9752109E-02
  -.1117717E-01  -.1248147E-01  -.1290765E-01  -.1159911E-01  -.7961418E-02
  -.2024855E-02   .5324372E-02   .1253453E-01   .1784649E-01   .1996585E-01
   .1863754E-01   .1484004E-01   .1045853E-01   .7382343E-02   .6587524E-02
   .7687149E-02   .9335130E-02   .1020061E-01   .9690729E-02   .8154268E-02
   .6571647E-02   .5909186E-02   .6604294E-02   .8496262E-02   .1098862E-01
   .1338356E-01   .1527814E-01   .1672678E-01   .1802203E-01   .1925451E-01
   .2009630E-01   .2003247E-01   .1870041E-01   .1616618E-01   .1294754E-01
   .9871450E-02   .7739385E-02   .7050128E-02   .7845245E-02   .9649539E-02
   .1160445E-01   .1281040E-01   .1266831E-01   .1109869E-01   .8606294E-02
   .6124642E-02   .4590266E-02   .4506679E-02   .5796251E-02   .7932082E-02
   .1016259E-01   .1164140E-01   .1150581E-01   .9230746E-02   .5095882E-02
   .3318455E-03  -.3423670E-02  -.5059044E-02  -.4513085E-02  -.2594012E-02
  -.5392162E-03   .4381031E-03  -.5157511E-03  -.3560042E-02  -.7986020E-02
  -.1236873E-01  -.1495176E-01  -.1430235E-01  -.9973908E-02  -.2871397E-02
   .4939966E-02   .1095684E-01   .1324775E-01   .1124837E-01   .5995143E-02
  -.2453139E-03  -.4886230E-02  -.6048590E-02  -.3187124E-02   .2869381E-02
   .1038306E-01   .1738303E-01   .2229295E-01   .2439303E-01   .2407776E-01
   .2262574E-01   .2163385E-01   .2239979E-01   .2536997E-01   .2992653E-01
   .3473513E-01   .3842771E-01   .4021921E-01   .4014887E-01   .3882661E-01
   .3694130E-01   .3487854E-01   .3279227E-01   .3088075E-01   .2943971E-01
   .2858422E-01   .2795570E-01   .2682784E-01   .2444638E-01   .2041731E-01
   .1489605E-01   .8560859E-02   .2536422E-02  -.1900357E-02  -.3794067E-02
  -.2920610E-02   .1042902E-03   .4213878E-02   .8404957E-02   .1188369E-01
   .1395777E-01   .1399003E-01   .1168175E-01   .7433741E-02   .2463963E-02
  -.1570572E-02  -.3444544E-02  -.3142420E-02  -.1729254E-02  -.4375544E-03
   .1845419E-03   .5417920E-03   .1414988E-02   .3119314E-02   .5158709E-02
   .6603291E-02   .6861943E-02   .6127480E-02   .5197253E-02   .4887206E-02
   .5516131E-02   .6770176E-02   .7883141E-02   .8082901E-02   .7205777E-02
   .6058229E-02   .6023786E-02   .8103059E-02   .1211700E-01   .1673879E-01
   .2021201E-01   .2119914E-01   .1923336E-01   .1472464E-01   .8830312E-02
   .3100059E-02  -.1002716E-02  -.2528358E-02  -.1355794E-02   .1749931E-02
   .5409861E-02   .8213861E-02   .9216814E-02   .8240967E-02   .5907475E-02
   .3300145E-02   .1386552E-02   .5352933E-03   .3955020E-03   .2103137E-03
  -.6012153E-03  -.2064161E-02  -.3724737E-02  -.5073739E-02  -.5957249E-02
  -.6540261E-02  -.6978383E-02  -.7185108E-02  -.6871363E-02  -.5809165E-02
  -.4198231E-02  -.2777319E-02  -.2587292E-02  -.4531098E-02  -.8845620E-02
  -.1484891E-01  -.2110205E-01  -.2590309E-01  -.2800603E-01  -.2710949E-01
  -.2386575E-01  -.1956047E-01  -.1561060E-01  -.1297301E-01  -.1173920E-01
  -.1110389E-01  -.9785534E-02  -.6739427E-02  -.1770788E-02   .4269409E-02
   .9818414E-02   .1328196E-01   .1359531E-01   .1052409E-01   .4755920E-02
  -.2156364E-02  -.8182483E-02  -.1156651E-01  -.1152061E-01  -.8437872E-02
  -.3526426E-02   .1671297E-02   .5785612E-02   .8025294E-02   .8226819E-02
   .6731947E-02   .4444226E-02   .2749795E-02   .2913485E-02   .5244536E-02
   .8708690E-02   .1148500E-01   .1221434E-01   .1090007E-01   .8753126E-02
   .7358292E-02   .7791847E-02   .1020328E-01   .1388543E-01   .1778402E-01
   .2093924E-01   .2268025E-01   .2255232E-01   .2013463E-01   .1526204E-01
   .8461064E-02   .1125887E-02  -.4833966E-02  -.7891004E-02  -.7778363E-02
  -.5501427E-02  -.2543319E-02  -.4305547E-04   .1471447E-02   .1936428E-02
   .1515256E-02   .6350192E-03  -.3983938E-04   .9478754E-04   .1249049E-02
   .2971400E-02   .4331052E-02   .4559487E-02   .3478500E-02   .1464984E-02
  -.8944055E-03  -.3266689E-02  -.5816940E-02  -.8969363E-02  -.1288930E-01
  -.1719778E-01  -.2119775E-01  -.2429395E-01  -.2632952E-01  -.2760721E-01
  -.2862203E-01  -.2971529E-01  -.3089778E-01  -.3194294E-01  -.3251138E-01
  -.3226656E-01  -.3103734E-01  -.2888247E-01  -.2618579E-01  -.2370982E-01
  -.2223814E-01  -.2207289E-01  -.2278414E-01  -.2331223E-01  -.2238074E-01
  -.1904024E-01  -.1325129E-01  -.6128870E-02   .4157758E-03   .4560894E-02
   .5471686E-02   .3653461E-02   .5654525E-03  -.2083224E-02  -.2938058E-02
  -.1438379E-02   .2001351E-02   .6208175E-02   .9802110E-02   .1183021E-01
   .1211399E-01   .1102644E-01   .9032295E-02   .6487589E-02   .3807019E-02
   .1565677E-02   .1782241E-03  -.4964591E-03  -.1125335E-02  -.2381658E-02
  -.4349840E-02  -.6330294E-02  -.7300978E-02  -.6654103E-02  -.4574987E-02
  -.1914749E-02   .2812271E-03   .1268956E-02   .8300991E-03  -.8531082E-03
  -.3381468E-02  -.6160463E-02  -.8414438E-02  -.9450077E-02  -.9110160E-02
  -.7783458E-02  -.6034334E-02  -.4250549E-02  -.2411638E-02  -.2835827E-03
   .2211919E-02   .4790167E-02   .6784452E-02   .7380048E-02   .6015585E-02
   .2834589E-02  -.1086891E-02  -.3947649E-02  -.3934203E-02  -.1933882E-03
   .6591396E-02   .1427896E-01   .2004438E-01   .2170114E-01   .1886628E-01
   .1310678E-01   .6894273E-02   .2274023E-02   .2345382E-03   .7531221E-03
   .3144306E-02   .6377008E-02   .9453881E-02   .1178248E-01   .1329705E-01
   .1439011E-01   .1560888E-01   .1725169E-01   .1904060E-01   .2007051E-01
   .1917287E-01   .1566172E-01   .9939110E-02   .3556733E-02  -.1372543E-02
  -.3281182E-02  -.2002066E-02   .1208389E-02   .4392055E-02   .5782654E-02
   .4449140E-02   .6057399E-03  -.4426828E-02  -.8723889E-02  -.1047936E-01
  -.8709878E-02  -.3823762E-02   .2540164E-02   .8427329E-02   .1248516E-01
   .1427904E-01   .1400097E-01   .1209791E-01   .9154167E-02   .5835508E-02
   .2738414E-02   .1261514E-03  -.2191638E-02  -.4588726E-02  -.7140478E-02
  -.9388254E-02  -.1057190E-01  -.1024025E-01  -.8790650E-02  -.7454486E-02
  -.7429935E-02  -.8926619E-02  -.1101246E-01  -.1230937E-01  -.1181172E-01
  -.9238968E-02  -.5014360E-02  -.2166075E-03   .3538229E-02   .4683488E-02
   .2626234E-02  -.1616500E-02  -.5800948E-02  -.7771239E-02  -.6588985E-02
  -.2674212E-02   .2818964E-02   .8637177E-02   .1352329E-01   .1628344E-01
   .1616575E-01   .1336679E-01   .9295324E-02   .6020088E-02   .5179596E-02
   .7132989E-02   .1089125E-01   .1485260E-01   .1764126E-01   .1849101E-01
   .1719159E-01   .1381765E-01   .8677302E-02   .2512523E-02  -.3520738E-02
  -.8022620E-02  -.9808780E-02  -.8527137E-02  -.4912855E-02  -.4523450E-03
   .3400853E-02   .5764490E-02   .6191274E-02   .4470867E-02   .7674225E-03
  -.4259626E-02  -.9579562E-02  -.1417584E-01  -.1741570E-01  -.1912346E-01
  -.1936506E-01  -.1817306E-01  -.1552660E-01  -.1166413E-01  -.7422354E-02
  -.4099729E-02  -.2789024E-02  -.3673496E-02  -.5955250E-02  -.8468018E-02
  -.1035807E-01  -.1131058E-01  -.1127920E-01  -.1023848E-01  -.8371331E-02
  -.6259374E-02  -.4687637E-02  -.4171518E-02  -.4487295E-02  -.4771744E-02
  -.4187280E-02  -.2541241E-02  -.3168813E-03   .1658489E-02   .2684272E-02
   .2684798E-02   .2277367E-02   .2249703E-02   .2867702E-02   .3735191E-02
   .4254725E-02   .3992820E-02   .2702376E-02   .2888096E-03  -.3007282E-02
  -.6392848E-02  -.8682097E-02  -.8839174E-02  -.6589478E-02  -.2742738E-02
   .1021139E-02   .2977711E-02   .2287250E-02  -.5843887E-03  -.4342095E-02
  -.7667885E-02  -.9797449E-02  -.1062510E-01  -.1038826E-01  -.9357896E-02
  -.7704496E-02  -.5540016E-02  -.3042264E-02  -.4501377E-03   .1963770E-02
   .3885459E-02   .5066353E-02   .5566078E-02   .5892988E-02   .6770525E-02
   .8622821E-02   .1125808E-01   .1395759E-01   .1586818E-01   .1632513E-01
   .1500064E-01   .1205954E-01   .8196637E-02   .4413440E-02   .1547484E-02
   .5880919E-04   .8958142E-04   .1625407E-02   .4509092E-02   .8248949E-02
   .1195740E-01   .1456105E-01   .1534804E-01   .1444490E-01   .1273953E-01
   .1126068E-01   .1052283E-01   .1036978E-01   .1034870E-01   .1008464E-01
   .9307411E-02   .7735030E-02   .5214079E-02   .1981356E-02  -.1382069E-02
  -.4326866E-02  -.6569683E-02  -.8056550E-02  -.8863405E-02  -.9173392E-02
  -.9341181E-02  -.9843408E-02  -.1102115E-01  -.1278684E-01  -.1456860E-01
  -.1552880E-01  -.1499453E-01  -.1270480E-01  -.8767134E-02  -.3567532E-02
   .2309696E-02   .8138726E-02   .1313229E-01   .1669346E-01   .1859173E-01
   .1888588E-01   .1773784E-01   .1537083E-01   .1208277E-01   .8217244E-02
   .4195631E-02   .5628883E-03  -.2111123E-02  -.3371828E-02  -.2982494E-02
  -.9742129E-03   .2173111E-02   .5414549E-02   .7408149E-02   .7100537E-02
   .4332369E-02  -.6585552E-06  -.4401826E-02  -.7494273E-02  -.8617512E-02
  -.8057267E-02  -.6651742E-02  -.5151432E-02  -.3894693E-02  -.2994780E-02
  -.2691156E-02  -.3270257E-02  -.4722605E-02  -.6588523E-02  -.8045772E-02
  -.8335526E-02  -.7280258E-02  -.5375316E-02  -.3350700E-02  -.1645465E-02
  -.4016632E-03   .2668754E-03   .2091175E-03  -.4975023E-03  -.1319039E-02
  -.1467220E-02  -.4613282E-03   .1324139E-02   .2736949E-02   .2653608E-02
   .9882662E-03  -.1146199E-02  -.2325239E-02  -.1907090E-02  -.4656841E-03
   .6887346E-03   .3357894E-03  -.1922712E-02  -.5484503E-02  -.9199990E-02
  -.1198045E-01  -.1308696E-01  -.1209042E-01  -.8962941E-02  -.4465610E-02
  -.2959017E-03   .1489730E-02  -.4498048E-03  -.5860636E-02  -.1289853E-01
  -.1899101E-01  -.2206605E-01  -.2142748E-01  -.1799167E-01  -.1385573E-01
  -.1134348E-01  -.1186495E-01  -.1511940E-01  -.1918582E-01  -.2174032E-01
  -.2154166E-01  -.1900653E-01  -.1562111E-01  -.1279254E-01  -.1120025E-01
  -.1088781E-01  -.1168440E-01  -.1347536E-01  -.1607166E-01  -.1889178E-01
  -.2079061E-01  -.2034253E-01  -.1650540E-01  -.9400544E-02  -.6632408E-03
   .7113271E-02   .1146060E-01   .1118017E-01   .7028107E-02   .1387123E-02
  -.2942391E-02  -.4022678E-02  -.1268920E-02   .4564608E-02   .1170109E-01
   .1803268E-01   .2184616E-01   .2249785E-01   .2071677E-01   .1818386E-01
   .1656265E-01   .1671175E-01   .1859152E-01   .2152886E-01   .2445855E-01
   .2618431E-01   .2583067E-01   .2342957E-01   .2005073E-01   .1714849E-01
   .1565583E-01   .1553754E-01   .1614381E-01   .1691526E-01   .1774089E-01
   .1879383E-01   .2019318E-01   .2179071E-01   .2312405E-01   .2338922E-01
   .2150977E-01   .1668243E-01   .9190087E-02   .9021665E-03  -.5290409E-02
  -.7059992E-02  -.4064328E-02   .1871419E-02   .7777082E-02   .1106463E-01
   .1057762E-01   .6778432E-02   .1292426E-02  -.3787200E-02  -.6766592E-02
  -.7089912E-02  -.5496741E-02  -.3529627E-02  -.2537376E-02  -.2712282E-02
  -.3072765E-02  -.2377745E-02  -.3174252E-04   .3666428E-02   .7757211E-02
   .1080435E-01   .1120285E-01   .7843635E-02   .9364916E-03  -.7745231E-02
  -.1552247E-01  -.2003689E-01  -.2028866E-01  -.1688022E-01  -.1157914E-01
  -.6618122E-02  -.4072657E-02  -.5372815E-02  -.1093453E-01  -.1979136E-01
  -.2960611E-01  -.3740849E-01  -.4081260E-01  -.3895589E-01  -.3272035E-01
  -.2434942E-01  -.1654164E-01  -.1127854E-01  -.8993081E-02  -.8712928E-02
  -.8925044E-02  -.8525218E-02  -.7364355E-02  -.6114219E-02  -.5660122E-02
  -.6447531E-02  -.8304378E-02  -.1057555E-01  -.1235263E-01  -.1277637E-01
  -.1131385E-01  -.8044439E-02  -.3789665E-02   .1018613E-03   .2257787E-02
   .1800981E-02  -.1198993E-02  -.5576055E-02  -.9528317E-02  -.1146490E-01
  -.1062801E-01  -.7154687E-02  -.1825293E-02   .4209248E-02   .9640519E-02
   .1317386E-01   .1380821E-01   .1116575E-01   .5682473E-02  -.1392792E-02
  -.8165021E-02  -.1258446E-01  -.1335965E-01  -.1077980E-01  -.6795598E-02
  -.4049646E-02  -.4431570E-02  -.8063150E-02  -.1321844E-01  -.1714435E-01
  -.1745486E-01  -.1346532E-01  -.6575862E-02   .4548043E-03   .4867652E-02
   .5217576E-02   .1929897E-02  -.3031347E-02  -.7202783E-02  -.8791564E-02
  -.7484271E-02  -.4603277E-02  -.2502206E-02  -.3361211E-02  -.7874461E-02
  -.1467745E-01  -.2098582E-01  -.2415091E-01  -.2306587E-01  -.1857583E-01
  -.1274978E-01  -.7736860E-02  -.4917043E-02  -.4587789E-02  -.6034546E-02
  -.7925517E-02  -.8974986E-02  -.8453386E-02  -.6335826E-02  -.3278960E-02
  -.3829364E-03   .1221666E-02   .9063627E-03  -.1079571E-02  -.3653974E-02
  -.5257649E-02  -.4512926E-02  -.8735975E-03   .5106796E-02   .1191611E-01
   .1763941E-01   .2079948E-01   .2097276E-01   .1884634E-01   .1575507E-01
   .1295998E-01   .1110939E-01   .1005286E-01   .9097317E-02   .7564372E-02
   .5325863E-02   .2907873E-02   .1140840E-02   .5835821E-03   .1078316E-02
   .1679340E-02   .1045185E-02  -.1910894E-02  -.7370653E-02  -.1430105E-01
  -.2077892E-01  -.2497786E-01  -.2606801E-01  -.2429134E-01  -.2049981E-01
  -.1570412E-01  -.1078775E-01  -.6355895E-02  -.2680135E-02   .2889959E-03
   .2740237E-02   .4672669E-02   .5874929E-02   .6170938E-02   .5506907E-02
   .3949467E-02   .1739179E-02  -.6046889E-03  -.2402627E-02  -.3078331E-02
  -.2458290E-02  -.9044597E-03   .9607679E-03   .2564480E-02   .3528102E-02
   .3667890E-02   .2863561E-02   .1104532E-02  -.1255387E-02  -.3472899E-02
  -.4761125E-02  -.4737592E-02  -.3650085E-02  -.2245557E-02  -.1204947E-02
  -.5737573E-03   .1637316E-03   .1590025E-02   .3830312E-02   .6493532E-02
   .8971922E-02   .1072843E-01   .1142916E-01   .1106089E-01   .9888025E-02
   .8234086E-02   .6226725E-02   .3714263E-02   .5477983E-03  -.3096235E-02
  -.6651481E-02  -.9354518E-02  -.1059699E-01  -.1013628E-01  -.8223590E-02
  -.5474108E-02  -.2523663E-02   .1864740E-03   .2377112E-02   .3771128E-02
   .4288306E-02   .4306593E-02   .4481432E-02   .5141827E-02   .5870616E-02
   .5692587E-02   .3744613E-02   .4382822E-04  -.4271079E-02  -.7471042E-02
  -.8188720E-02  -.6025320E-02  -.1565772E-02   .4037354E-02   .9579286E-02
   .1425162E-01   .1763972E-01   .1954013E-01   .1990724E-01   .1886640E-01
   .1674037E-01   .1400036E-01   .1125219E-01   .9128589E-02   .8117368E-02
   .8341309E-02   .9564027E-02   .1144042E-01   .1366914E-01   .1609026E-01
   .1872275E-01   .2164827E-01   .2484233E-01   .2806260E-01   .3083978E-01
   .3256292E-01   .3261483E-01   .3055166E-01   .2649488E-01   .2139371E-01
   .1671247E-01   .1364953E-01   .1265009E-01   .1349383E-01   .1563608E-01
   .1851338E-01   .2153289E-01   .2398491E-01   .2529224E-01   .2533013E-01
   .2454696E-01   .2368917E-01   .2313128E-01   .2241865E-01   .2061184E-01
   .1728263E-01   .1316702E-01   .9908569E-02   .8978869E-02   .1061842E-01
   .1370578E-01   .1653162E-01   .1772799E-01   .1674779E-01   .1387627E-01
   .9931791E-02   .5888306E-02   .2524780E-02   .5995304E-04  -.1967263E-02
  -.4308091E-02  -.7337383E-02  -.1072530E-01  -.1356080E-01  -.1482154E-01
  -.1402111E-01  -.1155014E-01  -.8572163E-02  -.6534889E-02  -.6572413E-02
  -.9042966E-02  -.1335551E-01  -.1823816E-01  -.2221866E-01  -.2418016E-01
  -.2378606E-01  -.2159088E-01  -.1864239E-01  -.1573811E-01  -.1298838E-01
  -.1014797E-01  -.7256781E-02  -.4749840E-02  -.3063191E-02  -.2276531E-02
  -.2084451E-02  -.2042272E-02  -.1841495E-02  -.1417034E-02  -.8558844E-03
  -.2293075E-03   .4533136E-03   .1092319E-02   .1413287E-02   .1283502E-02
   .1138841E-02   .2003003E-02   .4872180E-02   .9977211E-02   .1651322E-01
   .2290802E-01   .2747607E-01   .2914741E-01   .2793003E-01   .2476530E-01
   .2092227E-01   .1739160E-01   .1469946E-01   .1302134E-01   .1208588E-01
   .1114371E-01   .9388642E-02   .6628836E-02   .3482416E-02   .9247045E-03
  -.2718220E-03   .1244552E-03   .1763717E-02   .3913253E-02   .5616539E-02
   .5951592E-02   .4439175E-02   .1281810E-02  -.2708460E-02  -.6530141E-02
  -.9415125E-02  -.1105760E-01  -.1157202E-01  -.1120350E-01  -.1005364E-01
  -.7977099E-02  -.4880317E-02  -.1160856E-02   .2264950E-02   .4561420E-02
   .5443854E-02   .5060089E-02   .3702694E-02   .1656289E-02  -.5613827E-03
  -.2076197E-02  -.2142321E-02  -.7601597E-03   .1222279E-02   .2704634E-02
   .3091929E-02   .2515111E-02   .1491755E-02   .5588451E-03   .1995279E-03
   .7791861E-03   .2293374E-02   .4113283E-02   .5074014E-02   .4049889E-02
   .6420218E-03  -.4489061E-02  -.9879984E-02  -.1395727E-01  -.1568236E-01
  -.1476616E-01  -.1162250E-01  -.7198146E-02  -.2692458E-02   .8193267E-03
   .2776256E-02   .3268960E-02   .2806851E-02   .1961727E-02   .1105362E-02
   .2924861E-03  -.7293959E-03  -.2420013E-02  -.5034574E-02  -.8211363E-02
  -.1100525E-01  -.1236956E-01  -.1195201E-01  -.1043069E-01  -.9214902E-02
  -.9787170E-02  -.1296096E-01  -.1840815E-01  -.2472482E-01  -.3008457E-01
  -.3310329E-01  -.3329116E-01  -.3105093E-01  -.2733596E-01  -.2321642E-01
  -.1960032E-01  -.1712881E-01  -.1626848E-01  -.1735931E-01  -.2048780E-01
  -.2525741E-01  -.3074195E-01  -.3561887E-01  -.3867780E-01  -.3941414E-01
  -.3822213E-01  -.3597412E-01  -.3333908E-01  -.3036882E-01  -.2679546E-01
  -.2259175E-01  -.1831265E-01  -.1490677E-01  -.1304454E-01  -.1258020E-01
  -.1274966E-01  -.1287294E-01  -.1282027E-01  -.1291891E-01  -.1340163E-01
  -.1391530E-01  -.1365294E-01  -.1197677E-01  -.8932868E-02  -.5192092E-02
  -.1579831E-02   .1290163E-02   .3141171E-02   .4111206E-02   .4687505E-02
   .5414492E-02   .6538461E-02   .7752889E-02   .8331230E-02   .7633919E-02
   .5707938E-02   .3415092E-02   .1915121E-02   .1985891E-02   .3640959E-02
   .6227447E-02   .8783668E-02   .1036289E-01   .1021969E-01   .8041088E-02
   .4192043E-02  -.3873245E-03  -.4712217E-02  -.8314543E-02  -.1124239E-01
  -.1337566E-01  -.1401605E-01  -.1225398E-01  -.7921262E-02  -.2162506E-02
   .3118079E-02   .6310842E-02   .6962931E-02   .5869677E-02   .4461569E-02
   .3945303E-02   .4644122E-02   .6056901E-02   .7372070E-02   .7981782E-02
   .7752453E-02   .6877244E-02   .5727763E-02   .4812509E-02   .4596472E-02
   .5242462E-02   .6514782E-02   .7980132E-02   .9147287E-02   .9490372E-02
   .8585952E-02   .6468475E-02   .3907994E-02   .2352578E-02   .3174027E-02
   .6683494E-02   .1177640E-01   .1645742E-01   .1886159E-01   .1811626E-01
   .1467839E-01   .1005458E-01   .6068564E-02   .4054566E-02   .4489903E-02
   .7033961E-02   .1078630E-01   .1461056E-01   .1738305E-01   .1819314E-01
   .1672296E-01   .1341243E-01   .9260025E-02   .5498676E-02   .3233866E-02
   .3137295E-02   .5241239E-02   .8947417E-02   .1329242E-01   .1731140E-01
   .2020278E-01   .2130523E-01   .2011713E-01   .1661204E-01   .1165926E-01
   .6927723E-02   .4159973E-02   .4367651E-02   .7386397E-02   .1189419E-01
   .1599898E-01   .1806361E-01   .1737161E-01   .1431388E-01   .1006176E-01
   .6057628E-02   .3434897E-02   .2579559E-02   .3156759E-02   .4464374E-02
   .5888171E-02   .7090829E-02   .7861167E-02   .8013866E-02   .7522715E-02
   .6710408E-02   .6112924E-02   .6081290E-02   .6426174E-02   .6532709E-02
   .5911139E-02   .4573235E-02   .2865225E-02   .1023448E-02  -.1109432E-02
  -.3835988E-02  -.6964067E-02  -.9400055E-02  -.9564548E-02  -.6517530E-02
  -.9334385E-03   .4988278E-02   .8756518E-02   .8956880E-02   .5818632E-02
   .8859685E-03  -.3790928E-02  -.6416316E-02  -.6037971E-02  -.2894789E-02
   .1774089E-02   .6307698E-02   .9330913E-02   .1023738E-01   .9370157E-02
   .7713615E-02   .6219307E-02   .5281670E-02   .4680755E-02   .3957778E-02
   .2717716E-02   .6218733E-03  -.2563589E-02  -.6724556E-02  -.1116239E-01
  -.1469267E-01  -.1631181E-01  -.1587913E-01  -.1425448E-01  -.1284558E-01
  -.1286132E-01  -.1458030E-01  -.1706927E-01  -.1864125E-01  -.1769246E-01
  -.1350985E-01  -.6822377E-02   .4796270E-03   .6244085E-02   .8967499E-02
   .8347751E-02   .5312641E-02   .1589637E-02  -.1016948E-02  -.1240212E-02
   .1335553E-02   .6179607E-02   .1193700E-01   .1689135E-01   .1965117E-01
   .1987035E-01   .1850919E-01   .1720041E-01   .1719222E-01   .1858343E-01
   .2026372E-01   .2058236E-01   .1842226E-01   .1395575E-01   .8608511E-02
   .4330232E-02   .2594129E-02   .3739316E-02   .7103632E-02   .1147638E-01
   .1547347E-01   .1774957E-01   .1719034E-01   .1333705E-01   .6926452E-02
   .2430139E-04  -.4706022E-02  -.5371805E-02  -.1976255E-02   .3647076E-02
   .9075592E-02   .1268742E-01   .1415453E-01   .1398201E-01   .1286167E-01
   .1134882E-01   .9778744E-02   .8234920E-02   .6416953E-02   .3760574E-02
   .1889290E-04  -.4236045E-02  -.7724677E-02  -.9122115E-02  -.7956175E-02
  -.4992724E-02  -.1850154E-02  -.2199235E-03  -.1084911E-02  -.4345740E-02
  -.9022198E-02  -.1357812E-01  -.1641317E-01  -.1648797E-01  -.1374611E-01
  -.9181518E-02  -.4326900E-02  -.5469032E-03   .1430513E-02   .1446414E-02
  -.3992578E-03  -.3784227E-02  -.7983714E-02  -.1191241E-01  -.1455422E-01
  -.1545151E-01  -.1495438E-01  -.1383436E-01  -.1266217E-01  -.1158642E-01
  -.1052414E-01  -.9334884E-02  -.7883520E-02  -.6151047E-02  -.4212311E-02
  -.2150731E-02   .4352605E-04   .2577670E-02   .5700197E-02   .9400030E-02
   .1335388E-01   .1705767E-01   .2006931E-01   .2212609E-01   .2306204E-01
   .2284244E-01   .2169215E-01   .2014388E-01   .1893463E-01   .1855937E-01
   .1887455E-01   .1908791E-01   .1817338E-01   .1549253E-01   .1117830E-01
   .6155418E-02   .1784679E-02  -.8317787E-03  -.1398679E-02  -.5176087E-03
   .7557929E-03   .1547933E-02   .1572453E-02   .1081128E-02   .5026175E-03
   .1387698E-03   .1321027E-04  -.1082827E-03  -.5221880E-03  -.1259179E-02
  -.1895990E-02  -.1793313E-02  -.6150887E-03   .1426565E-02   .3689455E-02
   .5430654E-02   .6080966E-02   .5366071E-02   .3238001E-02  -.1845672E-03
  -.4494319E-02  -.8877021E-02  -.1221327E-01  -.1352507E-01  -.1246607E-01
  -.9441245E-02  -.5364750E-02  -.1334467E-02   .1634617E-02   .2875317E-02
   .2306206E-02   .5066773E-03  -.1336649E-02  -.1824102E-02  -.1528093E-03
   .3282834E-02   .7009552E-02   .9271890E-02   .8946459E-02   .5939551E-02
   .1160821E-02  -.3682712E-02  -.6589850E-02  -.6080637E-02  -.1987128E-02
   .4375279E-02   .1067522E-01   .1443805E-01   .1406779E-01   .9486903E-02
   .2159429E-02  -.5333989E-02  -.1013530E-01  -.1032998E-01  -.5843806E-02
   .1608766E-02   .9475392E-02   .1553316E-01   .1860648E-01   .1866444E-01
   .1650520E-01   .1320448E-01   .9627884E-02   .6283533E-02   .3406409E-02
   .1056765E-02  -.7757175E-03  -.2083263E-02  -.2757975E-02  -.2651333E-02
  -.1735942E-02  -.1081651E-03   .2054234E-02   .4523002E-02   .7000481E-02
   .9057212E-02   .1032873E-01   .1073584E-01   .1053874E-01   .1002225E-01
   .9138288E-02   .7538972E-02   .5010685E-02   .1923989E-02  -.8099293E-03
  -.2304485E-02  -.2291596E-02  -.1413852E-02  -.8831506E-03  -.1770103E-02
  -.4418123E-02  -.8359176E-02  -.1266771E-01  -.1640640E-01  -.1897963E-01
  -.2028186E-01  -.2056953E-01  -.2023865E-01  -.1963369E-01  -.1898505E-01
  -.1837231E-01  -.1763306E-01  -.1642254E-01  -.1454164E-01  -.1230355E-01
  -.1047706E-01  -.9857458E-02  -.1081540E-01  -.1305481E-01  -.1561511E-01
  -.1720705E-01  -.1677763E-01  -.1398471E-01  -.9374918E-02  -.4215457E-02
  -.5924931E-04   .1790248E-02   .6522105E-03  -.3261449E-02  -.8826813E-02
  -.1439825E-01  -.1834895E-01  -.1956872E-01  -.1781418E-01  -.1384237E-01
  -.9102860E-02  -.5083901E-02  -.2681034E-02  -.2028449E-02  -.2858723E-02
  -.4900636E-02  -.7962999E-02  -.1169098E-01  -.1541343E-01  -.1837591E-01
  -.2010896E-01  -.2051101E-01  -.1965079E-01  -.1764665E-01  -.1462466E-01
  -.1078551E-01  -.6603917E-02  -.2940837E-02  -.7738353E-03  -.7204230E-03
  -.2732702E-02  -.6136003E-02  -.9963997E-02  -.1331993E-01  -.1554051E-01
  -.1623295E-01  -.1522666E-01  -.1270595E-01  -.9472284E-02  -.6927781E-02
  -.6544620E-02  -.8979503E-02  -.1342673E-01  -.1779130E-01  -.1974759E-01
  -.1803297E-01  -.1316036E-01  -.7103954E-02  -.2099633E-02   .4939769E-03
   .5889518E-03  -.9234327E-03  -.2847088E-02  -.4241182E-02  -.4758361E-02
  -.4603737E-02  -.4240894E-02  -.4063732E-02  -.4098464E-02  -.3850893E-02
  -.2589861E-02  -.4703451E-04   .3127486E-02   .5588917E-02   .6080524E-02
   .4136187E-02   .2271010E-03  -.4480387E-02  -.8613631E-02  -.1099322E-01
  -.1087503E-01  -.8221676E-02  -.3866807E-02   .7645100E-03   .4290582E-02
   .5843827E-02   .5274139E-02   .3042244E-02  -.2940991E-04  -.3050980E-02
  -.5271598E-02  -.6213013E-02  -.5827170E-02  -.4480836E-02  -.2788392E-02
  -.1287116E-02  -.1311631E-03   .8791328E-03   .1962786E-02   .3220785E-02
   .4720366E-02   .6533405E-02   .8475216E-02   .9984538E-02   .1028988E-01
   .8818385E-02   .5602869E-02   .1333490E-02  -.2897073E-02  -.6091595E-02
  -.7760208E-02  -.7993077E-02  -.7336861E-02  -.6541460E-02  -.6307017E-02
  -.7080102E-02  -.8837359E-02  -.1105649E-01  -.1292461E-01  -.1362643E-01
  -.1263840E-01  -.9993136E-02  -.6325287E-02  -.2776183E-02  -.7634876E-03
  -.1560805E-02  -.5742405E-02  -.1274037E-01  -.2083176E-01  -.2773386E-01
  -.3155219E-01  -.3151033E-01  -.2807565E-01  -.2259976E-01  -.1671769E-01
  -.1190934E-01  -.9268254E-02  -.9144548E-02  -.1095866E-01  -.1359824E-01
  -.1601149E-01  -.1761138E-01  -.1830991E-01  -.1819633E-01  -.1732271E-01
  -.1581559E-01  -.1392538E-01  -.1193463E-01  -.1007919E-01  -.8425841E-02
  -.6848634E-02  -.5234857E-02  -.3649871E-02  -.2367661E-02  -.1660248E-02
  -.1598159E-02  -.2031702E-02  -.2741729E-02  -.3581238E-02  -.4464098E-02
  -.5268686E-02  -.5743089E-02  -.5567850E-02  -.4509371E-02  -.2418089E-02
   .7694297E-03   .4989497E-02   .9882051E-02   .1467289E-01   .1835555E-01
   .2011196E-01   .1980555E-01   .1810832E-01   .1617065E-01   .1502839E-01
   .1516246E-01   .1634168E-01   .1774349E-01   .1827770E-01   .1708366E-01
   .1393336E-01   .9328545E-02   .4341795E-02   .2045479E-03  -.2191458E-02
  -.2545688E-02  -.1169875E-02   .1194798E-02   .3578051E-02   .5004609E-02
   .4865787E-02   .3237607E-02   .8724974E-03  -.1278279E-02  -.2623818E-02
  -.3275809E-02  -.3890492E-02  -.5179644E-02  -.7584980E-02  -.1115940E-01
  -.1555842E-01  -.2000836E-01  -.2343537E-01  -.2499334E-01  -.2454612E-01
  -.2279688E-01  -.2091273E-01  -.1983818E-01  -.1983649E-01  -.2057538E-01
  -.2155360E-01  -.2240147E-01  -.2278472E-01  -.2226294E-01  -.2051266E-01
  -.1759830E-01  -.1407975E-01  -.1080135E-01  -.8460342E-02  -.7411279E-02
  -.7692735E-02  -.9079822E-02  -.1104983E-01  -.1273924E-01  -.1313098E-01
  -.1148760E-01  -.7826228E-02  -.2990439E-02   .1790776E-02   .5479985E-02
   .7598972E-02   .8280280E-02   .7966082E-02   .7056118E-02   .5776758E-02
   .4307171E-02   .2953251E-02   .2029610E-02   .1665899E-02   .1778512E-02
   .2144743E-02   .2550262E-02   .2930189E-02   .3259646E-02   .3380341E-02
   .3059992E-02   .2128408E-02   .5980370E-03  -.1177874E-02  -.2498098E-02
  -.2587375E-02  -.1067082E-02   .1654564E-02   .4447875E-02   .5985893E-02
   .5537967E-02   .3289684E-02   .7898156E-04  -.3042186E-02  -.5212882E-02
  -.6060210E-02  -.5824056E-02  -.5199195E-02  -.4866514E-02  -.5045325E-02
  -.5463746E-02  -.5619341E-02  -.5246155E-02  -.4580414E-02  -.4085786E-02
  -.4021545E-02  -.4246786E-02  -.4356572E-02  -.3935785E-02  -.2661423E-02
  -.2600179E-03   .3433572E-02   .8286077E-02   .1361802E-01   .1816608E-01
   .2048657E-01   .1971480E-01   .1623361E-01   .1157967E-01   .7646002E-02
   .5732081E-02   .6021594E-02   .7811982E-02   .1004116E-01   .1174528E-01
   .1236032E-01   .1185440E-01   .1076417E-01   .1004589E-01   .1063782E-01
   .1279341E-01   .1571804E-01   .1785311E-01   .1779096E-01   .1516982E-01
   .1079749E-01   .6162904E-02   .2827356E-02   .1853985E-02   .3539759E-02
   .7393178E-02   .1227183E-01   .1662351E-01   .1892047E-01   .1822086E-01
   .1453915E-01   .8875500E-02   .2811626E-02  -.2069068E-02  -.4666840E-02
  -.4657371E-02  -.2521698E-02   .7456502E-03   .4036219E-02   .6466270E-02
   .7688167E-02   .7925057E-02   .7779337E-02   .8003700E-02   .9121137E-02
   .1098730E-01   .1282200E-01   .1366202E-01   .1296702E-01   .1100033E-01
   .8688812E-02   .7115117E-02   .7010406E-02   .8470145E-02   .1102084E-01
   .1380949E-01   .1575885E-01   .1570378E-01   .1277074E-01   .6923843E-02
  -.6989507E-03  -.8015323E-02  -.1300461E-01  -.1475662E-01  -.1382636E-01
  -.1178869E-01  -.1032994E-01  -.1046766E-01  -.1225209E-01  -.1490473E-01
  -.1724805E-01  -.1822200E-01  -.1727354E-01  -.1454800E-01  -.1080575E-01
  -.7149367E-02  -.4661753E-02  -.3950938E-02  -.4848560E-02  -.6516930E-02
  -.7963851E-02  -.8671452E-02  -.8865436E-02  -.9397023E-02  -.1118057E-01
  -.1458382E-01  -.1926481E-01  -.2431043E-01  -.2848986E-01  -.3061900E-01
  -.2993300E-01  -.2645017E-01  -.2117592E-01  -.1583214E-01  -.1215036E-01
  -.1106794E-01  -.1221822E-01  -.1412673E-01  -.1507120E-01  -.1406365E-01
  -.1135721E-01  -.8149138E-02  -.5867258E-02  -.5435096E-02  -.6803927E-02
  -.9048977E-02  -.1087190E-01  -.1118827E-01  -.9584007E-02  -.6666635E-02
  -.4026785E-02  -.3615526E-02  -.6703409E-02  -.1295584E-01  -.2031665E-01
  -.2596956E-01  -.2783787E-01  -.2562534E-01  -.2081436E-01  -.1580351E-01
  -.1275365E-01  -.1259237E-01  -.1470469E-01  -.1743743E-01  -.1908123E-01
  -.1873169E-01  -.1656988E-01  -.1361965E-01  -.1103272E-01  -.9457740E-02
  -.8936191E-02  -.9218274E-02  -.1011114E-01  -.1145456E-01  -.1287556E-01
  -.1373542E-01  -.1333409E-01  -.1133078E-01  -.7988110E-02  -.4068610E-02
  -.5082359E-03   .1930256E-02   .2828495E-02   .2169962E-02   .3083075E-03
  -.2128591E-02  -.4395735E-02  -.5885311E-02  -.6325650E-02  -.5860606E-02
  -.5013748E-02  -.4470425E-02  -.4721359E-02  -.5756328E-02  -.6970190E-02
  -.7439705E-02  -.6471837E-02  -.4046419E-02  -.8845335E-03   .1911105E-02
   .3403418E-02   .3263501E-02   .1923989E-02   .2716195E-03  -.8346375E-03
  -.9202559E-03  -.5034703E-04   .1281018E-02   .2433422E-02   .2801240E-02
   .1916172E-02  -.3790930E-03  -.3746400E-02  -.7423753E-02  -.1058196E-01
  -.1281232E-01  -.1437839E-01  -.1590240E-01  -.1769295E-01  -.1945557E-01
  -.2058467E-01  -.2062417E-01  -.1951159E-01  -.1749695E-01  -.1485862E-01
  -.1176139E-01  -.8369515E-02  -.5038934E-02  -.2307856E-02  -.6577180E-03
  -.3571634E-03  -.1435881E-02  -.3672323E-02  -.6617661E-02  -.9652204E-02
  -.1218544E-01  -.1391123E-01  -.1478623E-01  -.1479131E-01  -.1381059E-01
  -.1174570E-01  -.8772322E-02  -.5418122E-02  -.2349949E-02  -.4602033E-04
   .1420921E-02   .2357544E-02   .3119656E-02   .3761583E-02   .3900689E-02
   .2980978E-02   .8423382E-03  -.1886754E-02  -.4112078E-02  -.4957140E-02
  -.4232639E-02  -.2402674E-02  -.3007718E-04   .2561559E-02   .5283580E-02
   .8086311E-02   .1071628E-01   .1262260E-01   .1305662E-01   .1130523E-01
   .7173584E-02   .1301713E-02  -.4902109E-02  -.9729063E-02  -.1181207E-01
  -.1068892E-01  -.6882192E-02  -.1454821E-02   .4584353E-02   .1066915E-01
   .1644625E-01   .2140201E-01   .2480630E-01   .2593965E-01   .2460468E-01
   .2148413E-01   .1788286E-01   .1506674E-01   .1379361E-01   .1421562E-01
   .1610894E-01   .1902633E-01   .2223278E-01   .2483279E-01   .2606265E-01
   .2561481E-01   .2386192E-01   .2164112E-01   .1975008E-01   .1856551E-01
   .1799851E-01   .1765014E-01   .1716842E-01   .1648985E-01   .1586811E-01
   .1566546E-01   .1614417E-01   .1741903E-01   .1936419E-01   .2159395E-01
   .2357976E-01   .2477431E-01   .2481150E-01   .2362678E-01   .2143863E-01
   .1864110E-01   .1567149E-01   .1289251E-01   .1047704E-01   .8415020E-02
   .6544470E-02   .4665434E-02   .2737801E-02   .9908092E-03  -.3459678E-04
   .3453421E-03   .2503105E-02   .6199334E-02   .1067823E-01   .1493556E-01
   .1802936E-01   .1941494E-01   .1910622E-01   .1763558E-01   .1577692E-01
   .1414605E-01   .1292842E-01   .1184530E-01   .1035877E-01   .8106473E-02
   .5300339E-02   .2729833E-02   .1293481E-02   .1442053E-02   .2982135E-02
   .5093334E-02   .6648624E-02   .6714899E-02   .4828607E-02   .1202506E-02
  -.3375048E-02  -.7989237E-02  -.1198800E-01  -.1512209E-01  -.1740591E-01
  -.1885489E-01  -.1938730E-01  -.1911811E-01  -.1866052E-01  -.1895838E-01
  -.2076944E-01  -.2399782E-01  -.2748124E-01  -.2949474E-01  -.2869047E-01
  -.2482989E-01  -.1883366E-01  -.1230505E-01  -.6876047E-02  -.3678070E-02
  -.2970716E-02  -.3920194E-02  -.4811858E-02  -.3863256E-02  -.2577135E-03
   .5316404E-02   .1092610E-01   .1436732E-01   .1433929E-01   .1113090E-01
   .6422092E-02   .2294130E-02   .2142070E-03   .4246729E-03   .1932082E-02
   .3095387E-02   .2405471E-02  -.8387613E-03  -.6172558E-02  -.1211498E-01
  -.1664331E-01  -.1801303E-01  -.1555585E-01  -.1005954E-01  -.3595149E-02
   .1307146E-02   .2838029E-02   .8516897E-03  -.3063469E-02  -.6557327E-02
  -.7718314E-02  -.5886954E-02  -.1835132E-02   .2721728E-02   .5926997E-02
   .6604749E-02   .4673812E-02   .1093514E-02  -.2691486E-02  -.5530936E-02
  -.7075854E-02  -.7676835E-02  -.7760005E-02  -.7298253E-02  -.5874518E-02
  -.3274812E-02   .1175400E-03   .3541629E-02   .6288521E-02   .8062505E-02
   .8997663E-02   .9338905E-02   .9242647E-02   .8735012E-02   .7790176E-02
   .6400484E-02   .4624188E-02   .2621468E-02   .6242125E-03  -.1105723E-02
  -.2294482E-02  -.2628711E-02  -.1815933E-02   .1117038E-03   .2596137E-02
   .4787274E-02   .6051813E-02   .6382964E-02   .6369444E-02   .6790198E-02
   .8122586E-02   .1043434E-01   .1359068E-01   .1730335E-01   .2093766E-01
   .2345954E-01   .2371504E-01   .2093037E-01   .1518045E-01   .7487879E-02
  -.5586944E-03  -.7307235E-02  -.1151971E-01  -.1279667E-01  -.1164594E-01
  -.9236931E-02  -.6898380E-02  -.5496949E-02  -.4987962E-02  -.4579541E-02
  -.3329121E-02  -.6615153E-03   .3367794E-02   .8123553E-02   .1258329E-01
   .1563473E-01   .1642438E-01   .1471314E-01   .1104476E-01   .6536898E-02
   .2410019E-02  -.4382350E-03  -.1694642E-02  -.1667190E-02  -.1054470E-02
  -.5493345E-03  -.5438569E-03  -.1108787E-02  -.1974572E-02  -.2581257E-02
  -.2195764E-02  -.1641722E-03   .3556178E-02   .8130363E-02   .1223572E-01
   .1471795E-01   .1519317E-01   .1424309E-01   .1305088E-01   .1261695E-01
   .1304806E-01   .1350774E-01   .1287249E-01   .1067849E-01   .7490263E-02
   .4597123E-02   .3411244E-02   .4700605E-02   .8128394E-02   .1237960E-01
   .1583597E-01   .1745188E-01   .1714055E-01   .1561995E-01   .1394105E-01
   .1299050E-01   .1324679E-01   .1464045E-01   .1647892E-01   .1779281E-01
   .1792105E-01   .1693215E-01   .1556631E-01   .1470133E-01   .1482111E-01
   .1577962E-01   .1694122E-01   .1751083E-01   .1681798E-01   .1458329E-01
   .1103409E-01   .6917388E-02   .3387262E-02   .1548501E-02   .1841104E-02
   .3794844E-02   .6409998E-02   .8712685E-02   .1015441E-01   .1053803E-01
   .9860153E-02   .8301260E-02   .6259921E-02   .4267236E-02   .2769877E-02
   .1969647E-02   .1795764E-02   .1984303E-02   .2120478E-02   .1738739E-02
   .4602733E-03  -.1755386E-02  -.4506833E-02  -.7058599E-02  -.8625707E-02
  -.8742014E-02  -.7408544E-02  -.5079382E-02  -.2453545E-02  -.1416758E-03
   .1515096E-02   .2330688E-02   .2182531E-02   .1185537E-02  -.1750772E-03
  -.1180034E-02  -.1237406E-02  -.2100642E-03   .1575465E-02   .3536875E-02
   .5077743E-02   .5838043E-02   .5742545E-02   .4906844E-02   .3560731E-02
   .2015177E-02   .5667788E-03  -.6547515E-03  -.1644980E-02  -.2346573E-02
  -.2519403E-02  -.1715783E-02   .5096724E-03   .4319691E-02   .9423620E-02
   .1509144E-01   .2032279E-01   .2411058E-01   .2576898E-01   .2524891E-01
   .2322416E-01   .2083422E-01   .1924345E-01   .1909215E-01   .2013153E-01
   .2133861E-01   .2147814E-01   .1986737E-01   .1682152E-01   .1343252E-01
   .1091737E-01   .9931927E-02   .1022490E-01   .1083536E-01   .1068797E-01
   .9072455E-02   .5899015E-02   .1791680E-02  -.2088361E-02  -.4476878E-02
  -.4533351E-02  -.2281635E-02   .1271763E-02   .4595162E-02   .6435932E-02
   .6504181E-02   .5658359E-02   .5342128E-02   .6568254E-02   .9397059E-02
   .1305638E-01   .1631797E-01   .1798209E-01   .1724585E-01   .1388912E-01
   .8396398E-02   .2008081E-02  -.3524610E-02  -.6535679E-02  -.6039689E-02
  -.2116315E-02   .4026360E-02   .1045773E-01   .1522178E-01   .1705344E-01
   .1589475E-01   .1284996E-01   .9469275E-02   .6994449E-02   .5906601E-02
   .5900517E-02   .6217818E-02   .6155844E-02   .5350880E-02   .3742706E-02
   .1597970E-02  -.5223005E-03  -.1961615E-02  -.2291275E-02  -.1517060E-02
   .1525050E-04   .1775510E-02   .3125496E-02   .3379716E-02   .1961512E-02
  -.1176652E-02  -.5365104E-02  -.9431515E-02  -.1219433E-01  -.1293192E-01
  -.1156807E-01  -.8623213E-02  -.4943177E-02  -.1472490E-02   .9897323E-03
   .1962072E-02   .1298455E-02  -.7470843E-03  -.3482454E-02  -.6074130E-02
  -.7881092E-02  -.8637599E-02  -.8372724E-02  -.7118205E-02  -.4652460E-02
  -.7584429E-03   .4270959E-02   .9466788E-02   .1365099E-01   .1601804E-01
   .1638900E-01   .1520947E-01   .1327261E-01   .1139295E-01   .1023897E-01
   .1028400E-01   .1171197E-01   .1421490E-01   .1698412E-01   .1899205E-01
   .1937081E-01   .1784842E-01   .1488083E-01   .1159604E-01   .9460151E-02
   .9685749E-02   .1255884E-01   .1719509E-01   .2196257E-01   .2524130E-01
   .2610149E-01   .2454587E-01   .2140070E-01   .1802339E-01   .1580230E-01
   .1555910E-01   .1710483E-01   .1920279E-01   .2016225E-01   .1874266E-01
   .1483701E-01   .9558967E-02   .4571958E-02   .1165125E-02  -.1573528E-03
   .4477012E-03   .2406785E-02   .4908823E-02   .7097603E-02   .8256961E-02
   .7952442E-02   .6188521E-02   .3507295E-02   .8266119E-03  -.9428827E-03
  -.1303473E-02  -.3758623E-03   .1146733E-02   .2284302E-02   .2309823E-02
   .1172809E-02  -.5281066E-03  -.1958894E-02  -.2502856E-02  -.2033882E-02
  -.9450642E-03   .1087111E-03   .6386462E-03   .5383797E-03  -.3613326E-04
  -.9520854E-03  -.2246856E-02  -.3998497E-02  -.6123280E-02  -.8295991E-02
  -.1006363E-01  -.1118287E-01  -.1181612E-01  -.1237958E-01  -.1308726E-01
  -.1353096E-01  -.1281424E-01  -.1026066E-01  -.6096478E-02  -.1486021E-02
   .2139957E-02   .3898969E-02   .3750431E-02   .2246859E-02   .9155322E-04
  -.2209504E-02  -.4301254E-02  -.5871643E-02  -.6702329E-02  -.6859538E-02
  -.6654009E-02  -.6317545E-02  -.5837948E-02  -.5088026E-02  -.4047648E-02
  -.2884004E-02  -.1823671E-02  -.1024377E-02  -.5854807E-03  -.6454322E-03
  -.1322521E-02  -.2460970E-02  -.3530909E-02  -.3793234E-02  -.2636034E-02
   .9827936E-04   .4042889E-02   .8432253E-02   .1235091E-01   .1500740E-01
   .1589940E-01   .1496256E-01   .1257655E-01   .9558061E-02   .7036407E-02
   .6101952E-02   .7271010E-02   .1008693E-01   .1313512E-01   .1459155E-01
   .1313365E-01   .8690936E-02   .2495475E-02  -.3580764E-02  -.7935762E-02
  -.9829696E-02  -.9516382E-02  -.7897456E-02  -.5973207E-02  -.4485626E-02
  -.3760387E-02  -.3600751E-02  -.3479763E-02  -.2871547E-02  -.1531347E-02
   .3666495E-03   .2251909E-02   .3419886E-02   .3474678E-02   .2635625E-02
   .1708128E-02   .1674942E-02   .3012819E-02   .5418861E-02   .8087911E-02
   .1020422E-01   .1129270E-01   .1126684E-01   .1027848E-01   .8737385E-02
   .7337776E-02   .6829994E-02   .7588520E-02   .9310364E-02   .1113370E-01
   .1213510E-01   .1195353E-01   .1099213E-01   .1009134E-01   .1000921E-01
   .1104013E-01   .1283809E-01   .1451375E-01   .1497968E-01   .1341141E-01
   .9719505E-02   .4809933E-02   .2728569E-03  -.2428952E-02  -.2636395E-02
  -.5686687E-03   .3020389E-02   .7214846E-02   .1109788E-01   .1387292E-01
   .1507650E-01   .1477404E-01   .1349827E-01   .1200447E-01   .1083640E-01
   .1005056E-01   .9298153E-02   .8054494E-02   .5964210E-02   .3140569E-02
   .1426390E-03  -.2342978E-02  -.3840816E-02  -.4184579E-02  -.3499124E-02
  -.2039048E-02   .5888283E-04   .2742172E-02   .5850000E-02   .9033014E-02
   .1174505E-01   .1339070E-01   .1357552E-01   .1230149E-01   .9996383E-02
   .7310349E-02   .4814464E-02   .2819055E-02   .1390637E-02   .4440562E-03
  -.1649420E-03  -.5634146E-03  -.8573172E-03  -.1220308E-02  -.1903737E-02
  -.2974529E-02  -.4184760E-02  -.5008644E-02  -.4866868E-02  -.3535523E-02
  -.1402142E-02   .6812546E-03   .1795652E-02   .1301090E-02  -.8731735E-03
  -.4128789E-02  -.7326164E-02  -.9258496E-02  -.9322278E-02  -.7776261E-02
  -.5527258E-02  -.3604315E-02  -.2775094E-02  -.3371683E-02  -.5237566E-02
  -.7768055E-02  -.1002807E-01  -.1105632E-01  -.1035439E-01  -.8187433E-02
  -.5425407E-02  -.3187776E-02  -.2341054E-02  -.3195161E-02  -.5447370E-02
  -.8320235E-02  -.1081210E-01  -.1202249E-01  -.1153257E-01  -.9577422E-02
  -.6971396E-02  -.4793218E-02  -.3777504E-02  -.3870618E-02  -.4299507E-02
  -.3951983E-02  -.1976689E-02   .1624881E-02   .5909410E-02   .9543995E-02
   .1152605E-01   .1167801E-01   .1061393E-01   .9293905E-02   .8469428E-02
   .8353258E-02   .8677883E-02   .8934285E-02   .8475898E-02   .6590899E-02
   .2819388E-02  -.2591277E-02  -.8536284E-02  -.1351195E-01  -.1644817E-01
  -.1736697E-01  -.1728171E-01  -.1739926E-01  -.1834780E-01  -.1990074E-01
  -.2121850E-01  -.2129793E-01  -.1935879E-01  -.1516647E-01  -.9277989E-02
  -.2900963E-02   .2565933E-02   .6047479E-02   .7221689E-02   .6603661E-02
   .5306028E-02   .4428648E-02   .4404544E-02   .4712902E-02   .4255042E-02
   .2063485E-02  -.2124059E-02  -.7646780E-02  -.1309310E-01  -.1686619E-01
  -.1785759E-01  -.1587153E-01  -.1175282E-01  -.7075475E-02  -.3388840E-02
  -.1689904E-02  -.2190791E-02  -.4276655E-02  -.6817465E-02  -.8652475E-02
  -.9103090E-02  -.8279682E-02  -.7046896E-02  -.6538127E-02  -.7337843E-02
  -.9109777E-02  -.1098567E-01  -.1220860E-01  -.1257300E-01  -.1232619E-01
  -.1179248E-01  -.1106651E-01  -.1019248E-01  -.9419386E-02  -.9096499E-02
  -.9355032E-02  -.9845270E-02  -.9927448E-02  -.9194187E-02  -.7864409E-02
  -.6737450E-02  -.6735498E-02  -.8476426E-02  -.1200267E-01  -.1677804E-01
  -.2178710E-01  -.2574606E-01  -.2759434E-01  -.2700412E-01  -.2460202E-01
  -.2163254E-01  -.1934013E-01  -.1843736E-01  -.1899744E-01  -.2061889E-01
  -.2249282E-01  -.2350513E-01  -.2244473E-01  -.1844260E-01  -.1150571E-01
  -.2833051E-02   .5459436E-02   .1123459E-01   .1327256E-01   .1163904E-01
   .7413575E-02   .2087022E-02  -.3057404E-02  -.7204833E-02  -.1000040E-01
  -.1138583E-01  -.1150737E-01  -.1058731E-01  -.8848202E-02  -.6575116E-02
  -.4044896E-02  -.1451627E-02   .1007742E-02   .3058904E-02   .4326534E-02
   .4430567E-02   .3241585E-02   .1054765E-02  -.1444370E-02  -.3391095E-02
  -.4104117E-02  -.3441664E-02  -.1849268E-02  -.2080061E-03   .5453930E-03
  -.4047836E-05  -.1479102E-02  -.2949744E-02  -.3440636E-02  -.2294436E-02
   .6100648E-03   .4840254E-02   .9451758E-02   .1307605E-01   .1427905E-01
   .1218836E-01   .7010159E-02   .5627587E-04  -.6747585E-02  -.1151145E-01
  -.1298403E-01  -.1101341E-01  -.6582802E-02  -.1384924E-02   .2861007E-02
   .5032269E-02   .4919910E-02   .3044955E-02   .2976430E-03  -.2323637E-02
  -.3971791E-02  -.4111654E-02  -.2582762E-02   .4775621E-03   .4776564E-02
   .9776797E-02   .1458778E-01   .1815650E-01   .1973088E-01   .1925059E-01
   .1736617E-01   .1504009E-01   .1297725E-01   .1130720E-01   .9689457E-02
   .7757445E-02   .5573748E-02   .3787966E-02   .3415770E-02   .5427759E-02
   .1032662E-01   .1772481E-01   .2620230E-01   .3356397E-01   .3750520E-01
   .3665509E-01   .3135784E-01   .2360507E-01   .1603806E-01   .1065613E-01
   .8032623E-02   .7421431E-02   .7467659E-02   .6979590E-02   .5404615E-02
   .2915714E-02   .1862537E-03  -.1867346E-02  -.2351750E-02  -.7313352E-03
   .2810683E-02   .7193125E-02   .1083282E-01   .1236633E-01   .1123631E-01
   .7922366E-02   .3646910E-02  -.2545808E-03  -.2884499E-02  -.3997387E-02
  -.3902250E-02  -.3207114E-02  -.2619756E-02  -.2766249E-02  -.3836956E-02
  -.5455609E-02  -.7005342E-02  -.8045195E-02  -.8522970E-02  -.8582286E-02
  -.8178618E-02  -.6958526E-02  -.4480769E-02  -.6074080E-03   .4268252E-02
   .9328633E-02   .1363109E-01   .1631028E-01   .1677479E-01   .1499871E-01
   .1159897E-01   .7652340E-02   .4386813E-02   .2799328E-02   .3199201E-02
   .5125585E-02   .7639289E-02   .9758794E-02   .1086066E-01   .1081052E-01
   .9864354E-02   .8399194E-02   .6667278E-02   .4771784E-02   .2775288E-02
   .7781300E-03  -.1105737E-02  -.2814922E-02  -.4337203E-02  -.5571427E-02
  -.6278143E-02  -.6078312E-02  -.4656129E-02  -.2078756E-02   .1086864E-02
   .3975921E-02   .5758208E-02   .6004844E-02   .4852046E-02   .2830528E-02
   .6603154E-03  -.1038001E-02  -.1949543E-02  -.2098798E-02  -.1658732E-02
  -.7161662E-03   .7363563E-03   .2620122E-02   .4618928E-02   .6205097E-02
   .6924821E-02   .6669008E-02   .5754974E-02   .4615914E-02   .3407445E-02
   .1963018E-02   .1307061E-03  -.1905111E-02  -.3600991E-02  -.4334522E-02
  -.3765298E-02  -.2058061E-02   .1618206E-03   .2069462E-02   .2848055E-02
   .1927665E-02  -.7957615E-03  -.4840737E-02  -.9193150E-02  -.1265057E-01
  -.1439976E-01  -.1448851E-01  -.1370574E-01  -.1300685E-01  -.1289418E-01
  -.1327746E-01  -.1375602E-01  -.1391510E-01  -.1353534E-01  -.1264306E-01
  -.1138722E-01  -.9953611E-02  -.8679329E-02  -.7977672E-02  -.8007651E-02
  -.8514929E-02  -.8943545E-02  -.8641095E-02  -.7162994E-02  -.4506518E-02
  -.1159429E-02   .2073151E-02   .4367243E-02   .5243727E-02   .4838425E-02
   .3867228E-02   .3315448E-02   .3910596E-02   .5630721E-02   .7676243E-02
   .8995161E-02   .8900980E-02   .7416042E-02   .5118208E-02   .2719833E-02
   .7702524E-03  -.4681230E-03  -.1023103E-02  -.1234949E-02  -.1671669E-02
  -.2720923E-02  -.4331232E-02  -.6164230E-02  -.7782689E-02  -.8782291E-02
  -.8917683E-02  -.8207723E-02  -.6991969E-02  -.5912629E-02  -.5682537E-02
  -.6689443E-02  -.8730806E-02  -.1109469E-01  -.1296893E-01  -.1389551E-01
  -.1391475E-01  -.1335408E-01  -.1260408E-01  -.1206703E-01  -.1217420E-01
  -.1331503E-01  -.1551441E-01  -.1813425E-01  -.2000400E-01  -.1994770E-01
  -.1742817E-01  -.1285430E-01  -.7404072E-02  -.2558854E-02   .4314487E-03
   .9754790E-03  -.7007318E-03  -.3755099E-02  -.6987277E-02  -.9121275E-02
  -.9165068E-02  -.6779342E-02  -.2459843E-02   .2506391E-02   .6476383E-02
   .8087570E-02   .6725570E-02   .2714688E-02  -.2923864E-02  -.8937423E-02
  -.1414413E-01  -.1762419E-01  -.1879930E-01  -.1756924E-01  -.1445123E-01
  -.1043243E-01  -.6503654E-02  -.3211584E-02  -.5173702E-03   .1982262E-02
   .4558781E-02   .6959360E-02   .8514550E-02   .8609075E-02   .7181895E-02
   .4865322E-02   .2700906E-02   .1594133E-02   .1879652E-02   .3299874E-02
   .5227512E-02   .6930407E-02   .7810237E-02   .7546351E-02   .6170942E-02
   .3942060E-02   .1225696E-02  -.1611502E-02  -.4308094E-02  -.6729944E-02
  -.8919517E-02  -.1105797E-01  -.1334407E-01  -.1578795E-01  -.1808062E-01
  -.1973776E-01  -.2028906E-01  -.1943779E-01  -.1724069E-01  -.1419359E-01
  -.1115031E-01  -.9105032E-02  -.8734827E-02  -.1007857E-01  -.1256343E-01
  -.1521578E-01  -.1703866E-01  -.1736790E-01  -.1611594E-01  -.1377364E-01
  -.1120758E-01  -.9371397E-02  -.9046701E-02  -.1043239E-01  -.1285219E-01
  -.1504058E-01  -.1574227E-01  -.1433692E-01  -.1121255E-01  -.7615517E-02
  -.4967723E-02  -.4167901E-02  -.5279638E-02  -.7496736E-02  -.9495161E-02
  -.1002675E-01  -.8457545E-02  -.5023324E-02  -.6956576E-03   .3278641E-02
   .5900741E-02   .6860545E-02   .6640257E-02   .6225185E-02   .6577872E-02
   .8150004E-02   .1074417E-01   .1364631E-01   .1590357E-01   .1674768E-01
   .1601260E-01   .1422551E-01   .1227641E-01   .1096642E-01   .1060105E-01
   .1087873E-01   .1112908E-01   .1069554E-01   .9273329E-02   .6979051E-02
   .4161078E-02   .1243374E-02  -.1266662E-02  -.2808328E-02  -.3028564E-02
  -.1997068E-02  -.1727666E-03   .1817410E-02   .3447666E-02   .4430533E-02
   .4603025E-02   .3867334E-02   .2222086E-02  -.5137733E-04  -.2341200E-02
  -.4023697E-02  -.4792022E-02  -.4780396E-02  -.4341528E-02  -.3695661E-02
  -.2869000E-02  -.1877967E-02  -.9170055E-03  -.3371464E-03  -.4821846E-03
  -.1423768E-02  -.2823166E-02  -.4109148E-02  -.4787121E-02  -.4686136E-02
  -.3986773E-02  -.3073624E-02  -.2292638E-02  -.1666610E-02  -.8619024E-03
   .5014255E-03   .2488581E-02   .4723700E-02   .6475940E-02   .6945269E-02
   .5654196E-02   .2681173E-02  -.1311405E-02  -.5274058E-02  -.8029765E-02
  -.8561691E-02  -.6454411E-02  -.2162505E-02   .3098931E-02   .7821191E-02
   .1073212E-01   .1119095E-01   .9287897E-02   .5740200E-02   .1662408E-02
  -.1709401E-02  -.3271536E-02  -.2367808E-02   .8969706E-03   .5588536E-02
   .1033795E-01   .1399350E-01   .1601112E-01   .1641690E-01   .1555057E-01
   .1377387E-01   .1139326E-01   .8826063E-02   .6679697E-02   .5549569E-02
   .5740252E-02   .7165581E-02   .9525984E-02   .1248198E-01   .1562383E-01
   .1836039E-01   .2005919E-01   .2032978E-01   .1929297E-01   .1748068E-01
   .1540163E-01   .1331068E-01   .1135532E-01   .9779345E-02   .8877216E-02
   .8808632E-02   .9448170E-02   .1036643E-01   .1096343E-01   .1058457E-01
   .8779148E-02   .5484719E-02   .1012281E-02  -.3947089E-02  -.8485661E-02
  -.1178570E-01  -.1342761E-01  -.1358618E-01  -.1293110E-01  -.1225110E-01
  -.1205894E-01  -.1244130E-01  -.1317716E-01  -.1394817E-01  -.1447168E-01
  -.1465482E-01  -.1466869E-01  -.1478846E-01  -.1517351E-01  -.1571271E-01
  -.1609349E-01  -.1596646E-01  -.1513579E-01  -.1378023E-01  -.1245130E-01
  -.1170431E-01  -.1177316E-01  -.1250565E-01  -.1357949E-01  -.1474814E-01
  -.1590475E-01  -.1698623E-01  -.1786519E-01  -.1842790E-01  -.1865147E-01
  -.1847332E-01  -.1762657E-01  -.1569821E-01  -.1240301E-01  -.7968096E-02
  -.3299729E-02   .3391360E-03   .1886459E-02   .9257611E-03  -.2287604E-02
  -.7045348E-02  -.1238883E-01  -.1721967E-01  -.2051006E-01  -.2151605E-01
  -.1995049E-01  -.1609877E-01  -.1085674E-01  -.5575489E-02  -.1606883E-02
   .1179798E-03  -.7201236E-03  -.3811529E-02  -.8289202E-02  -.1289961E-01
  -.1632861E-01  -.1776314E-01  -.1720843E-01  -.1551023E-01  -.1398445E-01
  -.1373412E-01  -.1508184E-01  -.1757102E-01  -.2038403E-01  -.2276795E-01
  -.2425271E-01  -.2469597E-01  -.2426089E-01  -.2329019E-01  -.2211780E-01
  -.2089200E-01  -.1951408E-01  -.1774913E-01  -.1542692E-01  -.1255799E-01
  -.9286087E-02  -.5769141E-02  -.2176793E-02   .1156521E-02   .3630898E-02
   .4543749E-02   .3472167E-02   .6721556E-03  -.2827758E-02  -.5621896E-02
  -.6643105E-02  -.5696257E-02  -.3399365E-02  -.6542032E-03   .1821474E-02
   .3565991E-02   .4219649E-02   .3549026E-02   .1699522E-02  -.6946493E-03
  -.2718838E-02  -.3629564E-02  -.3287601E-02  -.2177895E-02  -.1082013E-02
  -.6706326E-03  -.1263036E-02  -.2692892E-02  -.4478159E-02  -.6090180E-02
  -.7153840E-02  -.7610882E-02  -.7669171E-02  -.7588556E-02  -.7553902E-02
  -.7619903E-02  -.7734366E-02  -.7806864E-02  -.7774227E-02  -.7771668E-02
  -.8144888E-02  -.9245345E-02  -.1111104E-01  -.1326751E-01  -.1494550E-01
  -.1544670E-01  -.1445942E-01  -.1209154E-01  -.8839793E-02  -.5534233E-02
  -.3048692E-02  -.2026007E-02  -.2655335E-02  -.4513699E-02  -.6650303E-02
  -.8110346E-02  -.8423561E-02  -.7704315E-02  -.6411024E-02  -.4984684E-02
  -.3706686E-02  -.2803808E-02  -.2455023E-02  -.2671761E-02  -.3212333E-02
  -.3715055E-02  -.3939272E-02  -.3944849E-02  -.4094352E-02  -.4763453E-02
  -.6100056E-02  -.7914437E-02  -.9614704E-02  -.1044046E-01  -.9950016E-02
  -.8243170E-02  -.5904475E-02  -.3801467E-02  -.2611120E-02  -.2469709E-02
  -.3029722E-02  -.3631798E-02  -.3605896E-02  -.2597551E-02  -.7501418E-03
   .1278293E-02   .2495115E-02   .2044110E-02  -.2297672E-03  -.3579368E-02
  -.6712264E-02  -.8564246E-02  -.8980539E-02  -.8838982E-02  -.9403573E-02
  -.1144936E-01  -.1479658E-01  -.1835128E-01  -.2064682E-01  -.2059801E-01
  -.1804845E-01  -.1381869E-01  -.9201246E-02  -.5389320E-02  -.3093821E-02
  -.2344903E-02  -.2610965E-02  -.3114261E-02  -.3192131E-02  -.2649186E-02
  -.1856960E-02  -.1534060E-02  -.2279947E-02  -.4280857E-02  -.7269567E-02
  -.1061575E-01  -.1352378E-01  -.1531628E-01  -.1564984E-01  -.1458909E-01
  -.1248265E-01  -.9803393E-02  -.6939039E-02  -.4139868E-02  -.1662216E-02
   .1735668E-03   .1135154E-02   .1315605E-02   .1213822E-02   .1403851E-02
   .2173817E-02   .3319677E-02   .4226420E-02   .4264716E-02   .3131849E-02
   .1077908E-02  -.1271703E-02  -.3320533E-02  -.4701128E-02  -.5268701E-02
  -.5032039E-02  -.4125161E-02  -.2786021E-02  -.1353129E-02  -.1924191E-03
   .4952308E-03   .6668632E-03   .3809651E-03  -.2123320E-03  -.8627333E-03
  -.1298668E-02  -.1288267E-02  -.6622170E-03   .6304137E-03   .2443920E-02
   .4434087E-02   .6135314E-02   .7250530E-02   .7853304E-02   .8360645E-02
   .9237952E-02   .1063862E-01   .1228489E-01   .1365026E-01   .1423090E-01
   .1373294E-01   .1210522E-01   .9513082E-02   .6260984E-02   .2785447E-02
  -.3861982E-03  -.2660760E-02  -.3416959E-02  -.2237815E-02   .6664612E-03
   .4364367E-02   .7621828E-02   .9466692E-02   .9611502E-02   .8493238E-02
   .6894008E-02   .5525086E-02   .4757895E-02   .4552910E-02   .4718392E-02
   .5115565E-02   .5689595E-02   .6377252E-02   .6990517E-02   .7173950E-02
   .6554169E-02   .5026327E-02   .2957673E-02   .1081643E-02  -.9014063E-05
  -.2061230E-03   .4661710E-04   .2976156E-04  -.7498121E-03  -.2203988E-02
  -.3747532E-02  -.4733979E-02  -.4818564E-02  -.4108467E-02  -.3108552E-02
  -.2519801E-02  -.3037690E-02  -.5120367E-02  -.8669517E-02  -.1286481E-01
  -.1641532E-01  -.1804670E-01  -.1706780E-01  -.1371213E-01  -.9058842E-02
  -.4656660E-02  -.1809005E-02  -.9832118E-03  -.1677246E-02  -.2898120E-02
  -.3885916E-02  -.4399474E-02  -.4573320E-02  -.4591797E-02  -.4412923E-02
  -.3792482E-02  -.2529742E-02  -.6737661E-03   .1512042E-02   .3659630E-02
   .5437198E-02   .6674780E-02   .7472767E-02   .8130619E-02   .8890919E-02
   .9826406E-02   .1084511E-01   .1175582E-01   .1227598E-01   .1209993E-01
   .1103343E-01   .9175326E-02   .7038920E-02   .5342367E-02   .4617906E-02
   .4907813E-02   .5798511E-02   .6797337E-02   .7606109E-02   .8082539E-02
   .7993398E-02   .6968922E-02   .4833616E-02   .2000586E-02  -.5832489E-03
  -.1876727E-02  -.1329357E-02   .9440627E-03   .4437974E-02   .8524647E-02
   .1267067E-01   .1645979E-01   .1949909E-01   .2137374E-01   .2175902E-01
   .2057975E-01   .1795800E-01   .1406628E-01   .9125525E-02   .3583537E-02
  -.1823933E-02  -.6189061E-02  -.8711791E-02  -.9034253E-02  -.7321222E-02
  -.4247314E-02  -.8518290E-03   .1777863E-02   .2870504E-02   .2243872E-02
   .4144685E-03  -.1610753E-02  -.2909108E-02  -.3200509E-02  -.2961461E-02
  -.2956514E-02  -.3615628E-02  -.4819347E-02  -.5998912E-02  -.6485996E-02
  -.5837800E-02  -.3884047E-02  -.7073257E-03   .3360140E-02   .7736094E-02
   .1162534E-01   .1424029E-01   .1513102E-01   .1432542E-01   .1222529E-01
   .9312140E-02   .5825356E-02   .1810096E-02  -.2616880E-02  -.7052856E-02
  -.1087319E-01  -.1352278E-01  -.1465643E-01  -.1416799E-01  -.1221555E-01
  -.9292651E-02  -.6140033E-02  -.3517747E-02  -.1905317E-02  -.1277635E-02
  -.1168832E-02  -.9120086E-03   .1247787E-03   .2335347E-02   .5696506E-02
   .9757613E-02   .1382519E-01   .1719369E-01   .1943725E-01   .2053107E-01
   .2065209E-01   .1990480E-01   .1824382E-01   .1573969E-01   .1278203E-01
   .9986541E-02   .7956555E-02   .7062632E-02   .7306367E-02   .8249338E-02
   .9234228E-02   .9587894E-02   .8772475E-02   .6661340E-02   .3635203E-02
   .3323571E-03  -.2678573E-02  -.5013673E-02  -.6492974E-02  -.7201610E-02
  -.7389775E-02  -.7289548E-02  -.6970799E-02  -.6322453E-02  -.5225110E-02
  -.3722043E-02  -.2122845E-02  -.8683245E-03  -.2493150E-03  -.2987297E-03
  -.9740148E-03  -.2327812E-02  -.4423444E-02  -.7186367E-02  -.1033472E-01
  -.1339407E-01  -.1581229E-01  -.1719282E-01  -.1740408E-01  -.1659127E-01
  -.1506883E-01  -.1311125E-01  -.1084113E-01  -.8265808E-02  -.5461875E-02
  -.2704508E-02  -.4553184E-03   .8982784E-03   .1347107E-02   .1297142E-02
   .1307927E-02   .1739353E-02   .2624109E-02   .3821518E-02   .5193930E-02
   .6603169E-02   .7968994E-02   .9273819E-02   .1043898E-01   .1126161E-01
   .1141961E-01   .1057048E-01   .8630516E-02   .5976546E-02   .3297811E-02
   .1222839E-02  -.6065916E-05  -.6327489E-03  -.1142026E-02  -.1912722E-02
  -.3029575E-02  -.4203396E-02  -.4856686E-02  -.4411398E-02  -.2618940E-02
   .2914528E-03   .3706479E-02   .6841140E-02   .9003806E-02   .9859000E-02
   .9614510E-02   .8871741E-02   .8293980E-02   .8252304E-02   .8726462E-02
   .9471949E-02   .1019406E-01   .1064567E-01   .1061572E-01   .9830171E-02
   .8023138E-02   .5237761E-02   .2010509E-02  -.8757199E-03  -.2852468E-02
  -.3858031E-02  -.4310645E-02  -.4778163E-02  -.5483504E-02  -.6194284E-02
  -.6565239E-02  -.6622191E-02  -.6880981E-02  -.7973875E-02  -.1018283E-01
  -.1328300E-01  -.1671919E-01  -.1990295E-01  -.2242672E-01  -.2408035E-01
  -.2476840E-01  -.2448191E-01  -.2334997E-01  -.2168291E-01  -.1982798E-01
  -.1800333E-01  -.1615626E-01  -.1404772E-01  -.1158958E-01  -.8991030E-02
  -.6716901E-02  -.5224691E-02  -.4557489E-02  -.4206357E-02  -.3441618E-02
  -.1806735E-02   .6467897E-03   .3465585E-02   .6115081E-02   .8271123E-02
   .9926440E-02   .1130002E-01   .1251891E-01   .1346497E-01   .1384870E-01
   .1344835E-01   .1238780E-01   .1117634E-01   .1047200E-01   .1087766E-01
   .1274211E-01   .1597935E-01   .2006532E-01   .2412829E-01   .2712250E-01
   .2813817E-01   .2666571E-01   .2278896E-01   .1720706E-01   .1088755E-01
   .4671385E-02  -.8500367E-03  -.5237090E-02  -.8111198E-02  -.9305162E-02
  -.9040260E-02  -.7833702E-02  -.6288157E-02  -.5000361E-02  -.4540434E-02
  -.5285530E-02  -.7179606E-02  -.9762240E-02  -.1240717E-01  -.1445807E-01
  -.1538083E-01  -.1491631E-01  -.1313465E-01  -.1049659E-01  -.7807091E-02
  -.5935349E-02  -.5354554E-02  -.5908402E-02  -.6923816E-02  -.7480820E-02
  -.6895509E-02  -.5219687E-02  -.3217550E-02  -.1813540E-02  -.1633780E-02
  -.2855699E-02  -.5258843E-02  -.8316619E-02  -.1123922E-01  -.1317915E-01
  -.1356171E-01  -.1242879E-01  -.1047283E-01  -.8662713E-02  -.7666135E-02
  -.7319914E-02  -.6831814E-02  -.5442227E-02  -.2984831E-02  -.1184277E-04
   .2465646E-02   .3553215E-02   .2910043E-02   .8131652E-03  -.2061026E-02
  -.4943799E-02  -.7070862E-02  -.7692010E-02  -.6323117E-02  -.3142761E-02
   .8491228E-03   .4213702E-02   .5770496E-02   .5139367E-02   .2841033E-02
  -.1110560E-03  -.2716533E-02  -.4358902E-02  -.4882030E-02  -.4405921E-02
  -.3187385E-02  -.1563033E-02   .3010771E-04   .1086253E-02   .1298740E-02
   .7757330E-03   .9888769E-04   .1106740E-03   .1525502E-02   .4550695E-02
   .8696913E-02   .1283892E-01   .1561918E-01   .1605296E-01   .1403938E-01
   .1039890E-01   .6464422E-02   .3551281E-02   .2530853E-02   .3687841E-02
   .6729490E-02   .1085911E-01   .1496316E-01   .1785623E-01   .1866534E-01
   .1713049E-01   .1365398E-01   .9076735E-02   .4324639E-02   .1150438E-03
  -.3190850E-02  -.5621166E-02  -.7419145E-02  -.8766816E-02  -.9658142E-02
  -.9967631E-02  -.9671446E-02  -.8990527E-02  -.8279656E-02  -.7687089E-02
  -.7050148E-02  -.6017471E-02  -.4355595E-02  -.2206835E-02   .6107330E-04
   .2230427E-02   .4448125E-02   .7068727E-02   .1027525E-01   .1374697E-01
   .1672821E-01   .1843567E-01   .1848657E-01   .1706320E-01   .1462423E-01
   .1164825E-01   .8588439E-02   .5879700E-02   .3936849E-02   .2984270E-02
   .2848588E-02   .2962410E-02   .2614735E-02   .1375190E-02  -.5766601E-03
  -.2495506E-02  -.3429530E-02  -.2708254E-02  -.3609089E-03   .2874119E-02
   .5884991E-02   .7686967E-02   .7882564E-02   .6783809E-02   .5230368E-02
   .4176475E-02   .4255652E-02   .5522221E-02   .7514469E-02   .9468124E-02
   .1056734E-01   .1021331E-01   .8287424E-02   .5351304E-02   .2502639E-02
   .9144142E-03   .1274739E-02   .3425451E-02   .6385652E-02   .8918456E-02
   .1019962E-01   .1011625E-01   .9176097E-02   .8243646E-02   .8234409E-02
   .9752829E-02   .1282535E-01   .1680456E-01   .2054961E-01   .2291808E-01
   .2317285E-01   .2118092E-01   .1732818E-01   .1231972E-01   .7061550E-02
   .2420929E-02  -.1051474E-02  -.3219890E-02  -.4213996E-02  -.4340368E-02
  -.3863237E-02  -.2876429E-02  -.1392930E-02   .5253836E-03   .2700718E-02
   .4898807E-02   .6746854E-02   .7771191E-02   .7514005E-02   .5603883E-02
   .1910723E-02  -.3202723E-02  -.8681960E-02  -.1305125E-01  -.1506244E-01
  -.1420232E-01  -.1082553E-01  -.5898248E-02  -.6475299E-03   .3725099E-02
   .6353863E-02   .6958669E-02   .5845938E-02   .3899809E-02   .2348129E-02
   .2237285E-02   .3960281E-02   .7087501E-02   .1062994E-01   .1350843E-01
   .1498138E-01   .1488368E-01   .1365159E-01   .1206896E-01   .1092012E-01
   .1064266E-01   .1122671E-01   .1234550E-01   .1343103E-01   .1377951E-01
   .1268710E-01   .9842358E-02   .5705243E-02   .1503341E-02  -.1283657E-02
  -.1631967E-02   .5618926E-03   .4514335E-02   .9045217E-02   .1311192E-01
   .1603651E-01   .1743713E-01   .1711390E-01   .1509829E-01   .1167737E-01
   .7346518E-02   .2677139E-02  -.1844772E-02  -.5872662E-02  -.9164825E-02
  -.1151784E-01  -.1267835E-01  -.1242559E-01  -.1072888E-01  -.7818810E-02
  -.4195384E-02  -.5711694E-03   .2241132E-02   .3522183E-02   .2968339E-02
   .8382029E-03  -.2168508E-02  -.5057826E-02  -.6801796E-02  -.6698813E-02
  -.4653312E-02  -.1169401E-02   .2909752E-02   .6742950E-02   .9833920E-02
   .1218241E-01   .1407384E-01   .1578523E-01   .1735939E-01   .1857663E-01
   .1911851E-01   .1884091E-01   .1795468E-01   .1700010E-01   .1658050E-01
   .1698075E-01   .1801886E-01   .1918659E-01   .1998957E-01   .2015527E-01
   .1967440E-01   .1864791E-01   .1718828E-01   .1547158E-01   .1384767E-01
   .1276148E-01   .1253945E-01   .1323786E-01   .1457529E-01   .1609431E-01
   .1736415E-01   .1806869E-01   .1804479E-01   .1723630E-01   .1565751E-01
   .1340882E-01   .1069026E-01   .7839015E-02   .5309784E-02   .3580786E-02
   .3034310E-02   .3715245E-02   .5089838E-02   .6210042E-02   .6205809E-02
   .4785563E-02   .2474949E-02   .4144513E-03  -.2439972E-03   .9823682E-03
   .3599273E-02   .6359907E-02   .7876882E-02   .7185435E-02   .4182586E-02
  -.2579893E-03  -.4600399E-02  -.7312119E-02  -.7391393E-02  -.4698959E-02
   .1676361E-04   .5509290E-02   .1050526E-01   .1407528E-01   .1577641E-01
   .1561640E-01   .1398079E-01   .1145248E-01   .8549808E-02   .5707891E-02
   .3326673E-02   .1731648E-02   .1117948E-02   .1404418E-02   .2245286E-02
   .3182085E-02   .3812542E-02   .3860990E-02   .3216997E-02   .1904442E-02
   .7771462E-04  -.1921423E-02  -.3530817E-02  -.4167628E-02  -.3543375E-02
  -.1839285E-02   .3755488E-03   .2451290E-02   .3991167E-02   .4954459E-02
   .5589553E-02   .6247652E-02   .7250697E-02   .8718149E-02   .1041753E-01
   .1183476E-01   .1243092E-01   .1192918E-01   .1036558E-01   .8048472E-02
   .5366319E-02   .2715624E-02   .4715952E-03  -.1102180E-02  -.1912476E-02
  -.2079863E-02  -.1965022E-02  -.2053551E-02  -.2734062E-02  -.4177420E-02
  -.6367898E-02  -.9121788E-02  -.1197547E-01  -.1416502E-01  -.1499025E-01
  -.1420776E-01  -.1205603E-01  -.9046403E-02  -.5869780E-02  -.3246305E-02
  -.1692494E-02  -.1322123E-02  -.1730145E-02  -.2144072E-02  -.1839036E-02
  -.6003023E-03   .1221167E-02   .3110594E-02   .4764151E-02   .6123108E-02
   .7209130E-02   .8057181E-02   .8690403E-02   .9103584E-02   .9251202E-02
   .9030070E-02   .8492997E-02   .7973687E-02   .7889446E-02   .8433693E-02
   .9393247E-02   .1027881E-01   .1066520E-01   .1044577E-01   .9872025E-02
   .9434299E-02   .9726358E-02   .1109805E-01   .1341123E-01   .1611872E-01
   .1846541E-01   .1980737E-01   .1994359E-01   .1921876E-01   .1829213E-01
   .1771884E-01   .1760921E-01   .1762191E-01   .1728636E-01   .1631011E-01
   .1472478E-01   .1295196E-01   .1163065E-01   .1125391E-01   .1192031E-01
   .1329864E-01   .1481957E-01   .1586194E-01   .1588769E-01   .1466702E-01
   .1245410E-01   .9961347E-02   .8019933E-02   .7119935E-02   .7138196E-02
   .7425525E-02   .7125015E-02   .5614513E-02   .2885059E-02  -.4722387E-03
  -.3554551E-02  -.5528655E-02  -.6026216E-02  -.5229423E-02  -.3688516E-02
  -.2144868E-02  -.1208155E-02  -.1042060E-02  -.1311148E-02  -.1475660E-02
  -.1148507E-02  -.3742001E-03   .4920433E-03   .1105833E-02   .1341276E-02
   .1249930E-02   .9163455E-03   .3170292E-03  -.6548647E-03  -.2001165E-02
  -.3506698E-02  -.4849745E-02  -.5842158E-02  -.6459572E-02  -.6768868E-02
  -.6888064E-02  -.6938336E-02  -.7006141E-02  -.7054116E-02  -.6861507E-02
  -.6149168E-02  -.4901223E-02  -.3544853E-02  -.2691278E-02  -.2715242E-02
  -.3488608E-02  -.4483029E-02  -.5040628E-02  -.4778109E-02  -.3845716E-02
  -.2811833E-02  -.2335907E-02  -.2768242E-02  -.3953100E-02  -.5250869E-02
  -.5802195E-02  -.4956662E-02  -.2540644E-02   .1081588E-02   .5086801E-02
   .8429031E-02   .1033000E-01   .1059712E-01   .9564378E-02   .7805959E-02
   .5895337E-02   .4199702E-02   .2810834E-02   .1726021E-02   .1039212E-02
   .9175864E-03   .1444720E-02   .2446979E-02   .3480486E-02   .4000227E-02
   .3607203E-02   .2280669E-02   .5109204E-03  -.9273318E-03  -.1341858E-02
  -.4329114E-03   .1490498E-02   .3648086E-02   .5153501E-02   .5397490E-02
   .4336964E-02   .2373162E-02   .3674003E-04  -.2191455E-02  -.3980132E-02
  -.5214691E-02  -.5923066E-02  -.6138811E-02  -.5927677E-02  -.5440249E-02
  -.4867984E-02  -.4287714E-02  -.3637548E-02  -.2734756E-02  -.1405021E-02
   .2569270E-03   .1824153E-02   .2791217E-02   .2838226E-02   .1918797E-02
   .2210582E-03  -.1927502E-02  -.4149859E-02  -.5991029E-02  -.7067017E-02
  -.7305781E-02  -.6993735E-02  -.6695588E-02  -.7017180E-02  -.8354382E-02
  -.1074230E-01  -.1381041E-01  -.1695974E-01  -.1963145E-01  -.2144399E-01
  -.2221871E-01  -.2197073E-01  -.2076235E-01  -.1863198E-01  -.1571815E-01
  -.1239046E-01  -.9192080E-02  -.6700126E-02  -.5420414E-02  -.5576361E-02
  -.6985276E-02  -.9060939E-02  -.1101902E-01  -.1225053E-01  -.1253583E-01
  -.1198156E-01  -.1083691E-01  -.9366585E-02  -.7746082E-02  -.6026606E-02
  -.4145492E-02  -.1911362E-02   .7885859E-03   .3737619E-02   .6285847E-02
   .7473462E-02   .6559540E-02   .3591470E-02  -.4005251E-03  -.3782766E-02
  -.5150634E-02  -.3954893E-02  -.5663699E-03   .3972243E-02   .8248179E-02
   .1092019E-01   .1123273E-01   .9353134E-02   .6278538E-02   .3266325E-02
   .1144516E-02   .7447962E-04  -.2750208E-03  -.3125898E-03  -.9669556E-04
   .5940763E-03   .1886197E-02   .3619247E-02   .5474445E-02   .7113342E-02
   .8218102E-02   .8530488E-02   .7902926E-02   .6482143E-02   .4738386E-02
   .3185669E-02   .2159366E-02   .1811577E-02   .2082168E-02   .2718574E-02
   .3249061E-02   .3032417E-02   .1546395E-02  -.1247058E-02  -.4667044E-02
  -.7488262E-02  -.8537901E-02  -.7336737E-02  -.4354455E-02  -.6546659E-03
   .2698642E-02   .5021881E-02   .6157699E-02   .6410129E-02   .6327195E-02
   .6507911E-02   .7392074E-02   .9155469E-02   .1157249E-01   .1395686E-01
   .1539666E-01   .1517658E-01   .1309097E-01   .9568988E-02   .5532090E-02
   .1973357E-02  -.5003489E-03  -.1789130E-02  -.2166921E-02  -.2089014E-02
  -.1968824E-02  -.2071079E-02  -.2483062E-02  -.3033786E-02  -.3339123E-02
  -.3010607E-02  -.1860846E-02   .1225055E-03   .2765668E-02   .5702647E-02
   .8453349E-02   .1053251E-01   .1165087E-01   .1179928E-01   .1106403E-01
   .9521618E-02   .7284899E-02   .4546881E-02   .1708321E-02  -.6592778E-03
  -.2016290E-02  -.2055482E-02  -.8488286E-03   .1271449E-02   .3950972E-02
   .6898142E-02   .9851515E-02   .1247607E-01   .1450374E-01   .1582197E-01
   .1647624E-01   .1662840E-01   .1646026E-01   .1614092E-01   .1572028E-01
   .1504097E-01   .1383823E-01   .1198168E-01   .9580993E-02   .6925011E-02
   .4354560E-02   .2201632E-02   .7017245E-03  -.1443307E-03  -.5299578E-03
  -.7864288E-03  -.1355783E-02  -.2705684E-02  -.5145349E-02  -.8653820E-02
  -.1278358E-01  -.1669627E-01  -.1937618E-01  -.2000765E-01  -.1829203E-01
  -.1450546E-01  -.9362241E-02  -.3921804E-02   .5909560E-03   .3208848E-02
   .3602213E-02   .2093862E-02  -.5890663E-03  -.3549283E-02  -.5943308E-02
  -.7141856E-02  -.6959966E-02  -.5799727E-02  -.4474938E-02  -.3738957E-02
  -.3870519E-02  -.4652154E-02  -.5576059E-02  -.6138076E-02  -.6048357E-02
  -.5317560E-02  -.4202883E-02  -.3092899E-02  -.2426155E-02  -.2604788E-02
  -.3866118E-02  -.6125282E-02  -.8950863E-02  -.1166277E-01  -.1355413E-01
  -.1411225E-01  -.1315348E-01  -.1082917E-01  -.7536891E-02  -.3830072E-02
  -.3247524E-03   .2459995E-02   .4206214E-02   .4769868E-02   .4114820E-02
   .2317977E-02  -.3103360E-03  -.3200814E-02  -.5697593E-02  -.7272559E-02
  -.7561860E-02  -.6340948E-02  -.3667185E-02   .2731967E-04   .3994333E-02
   .7392867E-02   .9520698E-02   .1003440E-01   .9045788E-02   .6978935E-02
   .4421264E-02   .1989596E-02   .1422896E-03  -.9569615E-03  -.1411285E-02
  -.1463571E-02  -.1526894E-02  -.2049814E-02  -.3245594E-02  -.5032079E-02
  -.7022951E-02  -.8694082E-02  -.9608513E-02  -.9559459E-02  -.8556824E-02
  -.6827293E-02  -.4875996E-02  -.3363489E-02  -.2770661E-02  -.3125585E-02
  -.4041381E-02  -.4973148E-02  -.5510095E-02  -.5408099E-02  -.4600508E-02
  -.3290931E-02  -.1952205E-02  -.1253202E-02  -.1855150E-02  -.4067804E-02
  -.7575503E-02  -.1149246E-01  -.1466094E-01  -.1608019E-01  -.1527991E-01
  -.1250116E-01  -.8580173E-02  -.4637096E-02  -.1740142E-02  -.6488858E-03
  -.1610557E-02  -.4191344E-02  -.7349386E-02  -.9809124E-02  -.1069062E-01
  -.1000687E-01  -.8603793E-02  -.7670184E-02  -.8126036E-02  -.1006568E-01
  -.1262056E-01  -.1441243E-01  -.1418920E-01  -.1133741E-01  -.6129608E-02
   .4228240E-03   .6984802E-02   .1225185E-01   .1521103E-01   .1537103E-01
   .1294518E-01   .8857010E-02   .4441755E-02   .1023698E-02  -.5533243E-03
  -.1662970E-03   .1671400E-02   .4116232E-02   .6312303E-02   .7560350E-02
   .7391436E-02   .5729004E-02   .2974068E-02  -.5446597E-04  -.2386612E-02
  -.3246862E-02  -.2300009E-02   .2292680E-03   .3517817E-02   .6416155E-02
   .7946292E-02   .7731352E-02   .6175473E-02   .4232178E-02   .2947696E-02
   .2921337E-02   .3998741E-02   .5447325E-02   .6449520E-02   .6473426E-02
   .5343594E-02   .3248553E-02   .6835831E-03  -.1732721E-02  -.3499167E-02
  -.4420650E-02  -.4521057E-02  -.3918741E-02  -.2763655E-02  -.1235288E-02
   .4007801E-03   .1872745E-02   .2939724E-02   .3395992E-02   .3164013E-02
   .2370899E-02   .1342301E-02   .5405462E-03   .3848275E-03   .1040915E-02
   .2385462E-02   .4078268E-02   .5694922E-02   .6925214E-02   .7664220E-02
   .8028444E-02   .8351834E-02   .8959310E-02   .9924833E-02   .1095689E-01
   .1147236E-01   .1082693E-01   .8687658E-02   .5335800E-02   .1610395E-02
  -.1353961E-02  -.2440998E-02  -.1028543E-02   .2618115E-02   .7424523E-02
   .1193024E-01   .1483696E-01   .1546328E-01   .1378115E-01   .1020746E-01
   .5483662E-02   .5827906E-03  -.3483082E-02  -.5942393E-02  -.6573270E-02
  -.5674453E-02  -.3840002E-02  -.1789329E-02  -.1943561E-03   .4587342E-03
   .9899047E-04  -.8661366E-03  -.1789907E-02  -.2191945E-02  -.2047544E-02
  -.1779495E-02  -.2030499E-02  -.3163197E-02  -.4920071E-02  -.6655352E-02
  -.7835266E-02  -.8360842E-02  -.8439592E-02  -.8309629E-02  -.8138275E-02
  -.7986554E-02  -.7901951E-02  -.8026834E-02  -.8495239E-02  -.9215499E-02
  -.9856804E-02  -.1008783E-01  -.9786367E-02  -.8986084E-02  -.7716607E-02
  -.5891598E-02  -.3436420E-02  -.4844229E-03   .2520109E-02   .4972574E-02
   .6407734E-02   .6652000E-02   .5761620E-02   .3925760E-02   .1468028E-02
  -.1063360E-02  -.2985150E-02  -.3759573E-02  -.3166302E-02  -.1463922E-02
   .6352018E-03   .2165339E-02   .2317340E-02   .8755963E-03  -.1682441E-02
  -.4476470E-02  -.6663736E-02  -.7798991E-02  -.7936947E-02  -.7506456E-02
  -.7126880E-02  -.7355004E-02  -.8496975E-02  -.1046095E-01  -.1276748E-01
  -.1483000E-01  -.1614683E-01  -.1640334E-01  -.1562497E-01  -.1409888E-01
  -.1221930E-01  -.1040906E-01  -.9133406E-02  -.8818907E-02  -.9596869E-02
  -.1121063E-01  -.1309325E-01  -.1458353E-01  -.1519077E-01  -.1472661E-01
  -.1328235E-01  -.1111401E-01  -.8592296E-02  -.6161389E-02  -.4201865E-02
  -.2973137E-02  -.2596057E-02  -.3037707E-02  -.4097056E-02  -.5499605E-02
  -.6971061E-02  -.8285730E-02  -.9394637E-02  -.1042630E-01  -.1150354E-01
  -.1255883E-01  -.1342041E-01  -.1404836E-01  -.1460176E-01  -.1528191E-01
  -.1613741E-01  -.1700707E-01  -.1760649E-01  -.1765031E-01  -.1697044E-01
  -.1552307E-01  -.1340321E-01  -.1100544E-01  -.8963728E-02  -.7872495E-02
  -.7947524E-02  -.8877017E-02  -.9994438E-02  -.1065915E-01  -.1050098E-01
  -.9501606E-02  -.7959520E-02  -.6402427E-02  -.5412979E-02  -.5347726E-02
  -.6180124E-02  -.7528095E-02  -.8875401E-02  -.9793982E-02  -.1012762E-01
  -.1002302E-01  -.9716005E-02  -.9290286E-02  -.8678433E-02  -.7790430E-02
  -.6668081E-02  -.5538494E-02  -.4684199E-02  -.4288721E-02  -.4356745E-02
  -.4729229E-02  -.5183053E-02  -.5513166E-02  -.5562468E-02  -.5203995E-02
  -.4360589E-02  -.3023031E-02  -.1318163E-02   .4340414E-03   .1855960E-02
   .2735404E-02   .3131377E-02   .3280730E-02   .3313848E-02   .3051877E-02
   .2166687E-02   .5355265E-03  -.1555971E-02  -.3480126E-02  -.4647835E-02
  -.4842842E-02  -.4349547E-02  -.3828201E-02  -.3861191E-02  -.4606654E-02
  -.5793860E-02  -.6941009E-02  -.7678906E-02  -.7997506E-02  -.8138437E-02
  -.8342716E-02  -.8751134E-02  -.9348969E-02  -.1006539E-01  -.1092244E-01
  -.1206300E-01  -.1364670E-01  -.1567766E-01  -.1795589E-01  -.2013468E-01
  -.2187604E-01  -.2296468E-01  -.2333290E-01  -.2302895E-01  -.2218648E-01
  -.2108125E-01  -.2010236E-01  -.1950344E-01  -.1912725E-01  -.1844500E-01
  -.1691116E-01  -.1439065E-01  -.1131219E-01  -.8503006E-02  -.6826424E-02
  -.6707862E-02  -.7955047E-02  -.9899001E-02  -.1166793E-01  -.1247683E-01
  -.1188197E-01  -.9951650E-02  -.7344572E-02  -.5080400E-02  -.4003860E-02
  -.4380287E-02  -.5860052E-02  -.7728740E-02  -.9301196E-02  -.1013623E-01
  -.1009919E-01  -.9425404E-02  -.8639424E-02  -.8352122E-02  -.8853614E-02
  -.9858350E-02  -.1065037E-01  -.1051283E-01  -.9037133E-02  -.6268751E-02
  -.2680033E-02   .9583809E-03   .3825107E-02   .5285693E-02   .5035244E-02
   .3254917E-02   .6226762E-03  -.1940496E-02  -.3629285E-02  -.4094015E-02
  -.3512586E-02  -.2445832E-02  -.1608298E-02  -.1562181E-02  -.2442152E-02
  -.3921472E-02  -.5488900E-02  -.6803760E-02  -.7781127E-02  -.8396151E-02
  -.8584187E-02  -.8266291E-02  -.7428726E-02  -.6276461E-02  -.5217142E-02
  -.4595319E-02  -.4517522E-02  -.4911998E-02  -.5637608E-02  -.6587458E-02
  -.7571063E-02  -.8253192E-02  -.8325539E-02  -.7717696E-02  -.6716228E-02
  -.5780712E-02  -.5311657E-02  -.5520714E-02  -.6396609E-02  -.7783187E-02
  -.9517922E-02  -.1145845E-01  -.1341784E-01  -.1515486E-01  -.1642584E-01
  -.1715502E-01  -.1745414E-01  -.1753360E-01  -.1757759E-01  -.1759961E-01
  -.1738566E-01  -.1663583E-01  -.1518367E-01  -.1304878E-01  -.1042451E-01
  -.7675427E-02  -.5273615E-02  -.3609982E-02  -.2786295E-02  -.2527225E-02
  -.2264901E-02  -.1448437E-02   .1516660E-03   .2322670E-02   .4543292E-02
   .6291973E-02   .7210574E-02   .7120513E-02   .5943554E-02   .3815519E-02
   .1178151E-02  -.1342237E-02  -.3124553E-02  -.3729452E-02  -.3043859E-02
  -.1290501E-02   .1043062E-02   .3318601E-02   .4927324E-02   .5455596E-02
   .4799095E-02   .3187013E-02   .1176467E-02  -.4888738E-03  -.1249531E-02
  -.9671070E-03   .5741314E-04   .1267383E-02   .2140693E-02   .2353879E-02
   .1792453E-02   .5403993E-03  -.1113346E-02  -.2721825E-02  -.3779809E-02
  -.3827430E-02  -.2637957E-02  -.3439087E-03   .2534441E-02   .5205211E-02
   .6918570E-02   .7279321E-02   .6376231E-02   .4680202E-02   .2898590E-02
   .1730817E-02   .1548927E-02   .2316238E-02   .3621465E-02   .4826959E-02
   .5262022E-02   .4493351E-02   .2605882E-02   .1491687E-03  -.2100470E-02
  -.3394557E-02  -.3378244E-02  -.2246136E-02  -.6222964E-03   .6676909E-03
   .9303656E-03  -.1142398E-03  -.2233228E-02  -.4798113E-02  -.7087495E-02
  -.8643558E-02  -.9418286E-02  -.9734421E-02  -.1008468E-01  -.1083616E-01
  -.1210494E-01  -.1372828E-01  -.1530423E-01  -.1639921E-01  -.1664785E-01
  -.1582313E-01  -.1395338E-01  -.1134787E-01  -.8499645E-02  -.5960197E-02
  -.4222951E-02  -.3565605E-02  -.4001866E-02  -.5227612E-02  -.6583845E-02
  -.7308680E-02  -.6923504E-02  -.5449480E-02  -.3380690E-02  -.1384514E-02
   .1676877E-04   .6508208E-03   .6243145E-03   .2297714E-03  -.6504998E-04
   .2119199E-03   .1376378E-02   .3376111E-02   .5738969E-02   .7824231E-02
   .9113402E-02   .9469735E-02   .9225413E-02   .8907361E-02   .8863873E-02
   .9094703E-02   .9382365E-02   .9468596E-02   .9145891E-02   .8298395E-02
   .6937462E-02   .5259665E-02   .3595937E-02   .2361446E-02   .1924447E-02
   .2378758E-02   .3530587E-02   .5065226E-02   .6686847E-02   .8092921E-02
   .8974527E-02   .9053113E-02   .8132151E-02   .6262468E-02   .3951256E-02
   .2078230E-02   .1450619E-02   .2399704E-02   .4688104E-02   .7590259E-02
   .1010977E-01   .1133879E-01   .1080089E-01   .8654799E-02   .5661891E-02
   .2866474E-02   .1125999E-02   .8243251E-03   .1790645E-02   .3413492E-02
   .4927872E-02   .5679401E-02   .5305453E-02   .3881221E-02   .1876099E-02
  -.6540611E-04  -.1370981E-02  -.1775861E-02  -.1404642E-02  -.5997289E-03
   .3850056E-03   .1539644E-02   .2988368E-02   .4740170E-02   .6604296E-02
   .8260444E-02   .9411673E-02   .9869026E-02   .9550303E-02   .8602388E-02
   .7396816E-02   .6291986E-02   .5415276E-02   .4544519E-02   .3273113E-02
   .1312341E-02  -.1240345E-02  -.3831334E-02  -.5708439E-02  -.6271233E-02
  -.5295178E-02  -.3051247E-02  -.2711853E-03   .2127950E-02   .3504322E-02
   .3646020E-02   .2695928E-02   .1044957E-02  -.7054827E-03  -.1854941E-02
  -.1933470E-02  -.9043035E-03   .8413991E-03   .2647939E-02   .3811896E-02
   .3882065E-02   .2821132E-02   .1072404E-02  -.5603729E-03  -.1208143E-02
  -.2429002E-03   .2409272E-02   .6143413E-02   .9806363E-02   .1218904E-01
   .1260578E-01   .1111128E-01   .8349772E-02   .5249737E-02   .2665025E-02
   .1142376E-02   .7983928E-03   .1238782E-02   .1833303E-02   .2118398E-02
   .2035687E-02   .1905960E-02   .2176146E-02   .3141572E-02   .4791802E-02
   .6825461E-02   .8775530E-02   .1020535E-01   .1090697E-01   .1102432E-01
   .1089507E-01   .1076010E-01   .1069079E-01   .1062318E-01   .1048941E-01
   .1022462E-01   .9730181E-02   .8931591E-02   .7863521E-02   .6693126E-02
   .5615514E-02   .4792526E-02   .4301735E-02   .4131882E-02   .4236857E-02
   .4557844E-02   .4946830E-02   .5192000E-02   .5192003E-02   .5036625E-02
   .5058077E-02   .5647571E-02   .6981233E-02   .8862974E-02   .1074652E-01
   .1197261E-01   .1220868E-01   .1161461E-01   .1064009E-01   .9805721E-02
   .9552945E-02   .1006519E-01   .1117736E-01   .1246283E-01   .1349128E-01
   .1398198E-01   .1377615E-01   .1285191E-01   .1129369E-01   .9245748E-02
   .6973024E-02   .4934986E-02   .3597795E-02   .3108343E-02   .3225801E-02
   .3569158E-02   .3788781E-02   .3627703E-02   .2978879E-02   .1906844E-02
   .6326339E-03  -.6117900E-03  -.1633609E-02  -.2281440E-02  -.2500595E-02
  -.2345892E-02  -.1974554E-02  -.1667437E-02  -.1779972E-02  -.2584111E-02
  -.4025742E-02  -.5702938E-02  -.7078875E-02  -.7650603E-02  -.7180003E-02
  -.5834724E-02  -.4122676E-02  -.2606565E-02  -.1577832E-02  -.9618254E-03
  -.4329385E-03   .3647573E-03   .1712045E-02   .3729720E-02   .6278137E-02
   .8962449E-02   .1129674E-01   .1288058E-01   .1351495E-01   .1332611E-01
   .1276285E-01   .1230353E-01   .1223395E-01   .1251048E-01   .1278300E-01
   .1259692E-01   .1156394E-01   .9515198E-02   .6648519E-02   .3492493E-02
   .7669105E-03  -.8949003E-03  -.1232210E-02  -.4456105E-03   .8854487E-03
   .2019501E-02   .2350998E-02   .1655059E-02   .1285355E-03  -.1767866E-02
  -.3496663E-02  -.4624083E-02  -.4929712E-02  -.4488435E-02  -.3670932E-02
  -.2971843E-02  -.2777306E-02  -.3165914E-02  -.3948346E-02  -.4808539E-02
  -.5453605E-02  -.5747600E-02  -.5810079E-02  -.5949691E-02  -.6451375E-02
  -.7406996E-02  -.8682426E-02  -.9945547E-02  -.1074042E-01  -.1068163E-01
  -.9723352E-02  -.8189121E-02  -.6576714E-02  -.5338331E-02  -.4768234E-02
  -.4907368E-02  -.5540092E-02  -.6271454E-02  -.6629498E-02  -.6267677E-02
  -.5126636E-02  -.3479563E-02  -.1828558E-02  -.6169326E-03   .1562571E-04
   .2903893E-03   .6260651E-03   .1395442E-02   .2763429E-02   .4593960E-02
   .6526624E-02   .8240181E-02   .9544575E-02   .1035162E-01   .1071014E-01
   .1076153E-01   .1066288E-01   .1058486E-01   .1062608E-01   .1071385E-01
   .1074232E-01   .1077685E-01   .1096273E-01   .1141380E-01   .1214601E-01
   .1301405E-01   .1368322E-01   .1376066E-01   .1308756E-01   .1183126E-01
   .1036074E-01   .9015757E-02   .8007108E-02   .7468600E-02   .7477235E-02
   .7999032E-02   .8904611E-02   .9956903E-02   .1087108E-01   .1144287E-01
   .1157179E-01   .1119439E-01   .1035382E-01   .9317901E-02   .8485526E-02
   .8204253E-02   .8601308E-02   .9541407E-02   .1072049E-01   .1180871E-01
   .1250469E-01   .1256599E-01   .1188858E-01   .1058324E-01   .8920387E-02
   .7248453E-02   .5929031E-02   .5216893E-02   .5084989E-02   .5223392E-02
   .5222825E-02   .4851697E-02   .4109144E-02   .3190973E-02   .2342291E-02
   .1683669E-02   .1242766E-02   .9697364E-03   .7520027E-03   .4289430E-03
  -.2063700E-03  -.1245379E-02  -.2566671E-02  -.3862367E-02  -.4728272E-02
  -.4789252E-02  -.3817553E-02  -.1842846E-02   .8687580E-03   .3942624E-02
   .6963911E-02   .9559708E-02   .1139026E-01   .1218701E-01   .1188501E-01
   .1067190E-01   .8922108E-02   .7087988E-02   .5554680E-02   .4584395E-02
   .4336551E-02   .4772597E-02   .5563639E-02   .6210904E-02   .6314335E-02
   .5796523E-02   .4859327E-02   .3755282E-02   .2685482E-02   .1885089E-02
   .1602507E-02   .1985319E-02   .2965457E-02   .4262067E-02   .5557679E-02
   .6655526E-02   .7447678E-02   .7927836E-02   .8331713E-02   .9065194E-02
   .1029199E-01   .1171535E-01   .1277683E-01   .1302841E-01   .1239027E-01
   .1117798E-01   .9942840E-02   .9219378E-02   .9199943E-02   .9616973E-02
   .9931426E-02   .9619729E-02   .8450504E-02   .6531676E-02   .4184759E-02
   .1839325E-02   .4764357E-04  -.6281161E-03   .1330522E-03   .2212506E-02
   .5096416E-02   .8065988E-02   .1039054E-01   .1149851E-01   .1109564E-01
   .9282570E-02   .6583738E-02   .3792545E-02   .1661054E-02   .5415000E-03
   .2871580E-03   .3896147E-03   .1934478E-03  -.8124973E-03  -.2714548E-02
  -.5115700E-02  -.7376534E-02  -.9043083E-02  -.1007349E-01  -.1073940E-01
  -.1127799E-01  -.1164217E-01  -.1155090E-01  -.1071843E-01  -.9006899E-02
  -.6491583E-02  -.3421491E-02  -.2055368E-03   .2630749E-02   .4633700E-02
   .5610243E-02   .5654374E-02   .5089756E-02   .4405360E-02   .4015155E-02
   .4038172E-02   .4281575E-02   .4442999E-02   .4384119E-02   .4191810E-02
   .4016752E-02   .3897541E-02   .3744018E-02   .3428166E-02   .2860869E-02
   .2101964E-02   .1353469E-02   .8407492E-03   .6981506E-03   .9630443E-03
   .1553987E-02   .2229126E-02   .2665621E-02   .2632100E-02   .2105725E-02
   .1253852E-02   .3312071E-03  -.4630188E-03  -.1074107E-02  -.1626710E-02
  -.2306712E-02  -.3131559E-02  -.3929037E-02  -.4474963E-02  -.4608423E-02
  -.4296829E-02  -.3722549E-02  -.3211324E-02  -.3066744E-02  -.3403202E-02
  -.4074948E-02  -.4736407E-02  -.4943884E-02  -.4325256E-02  -.2701197E-02
  -.1114374E-03   .3109581E-02   .6404756E-02   .9232653E-02   .1132722E-01
   .1275459E-01   .1370886E-01   .1436285E-01   .1484250E-01   .1519380E-01
   .1526427E-01   .1478673E-01   .1361517E-01   .1178913E-01   .9516582E-02
   .7103277E-02   .4860866E-02   .3042366E-02   .1868092E-02   .1463749E-02
   .1778725E-02   .2604174E-02   .3657921E-02   .4646258E-02   .5334724E-02
   .5587604E-02   .5431033E-02   .5101239E-02   .4986905E-02   .5405853E-02
   .6341495E-02   .7458327E-02   .8355064E-02   .8722146E-02   .8339487E-02
   .7040625E-02   .4749107E-02   .1566685E-02  -.2164862E-02  -.5860391E-02
  -.8815730E-02  -.1047797E-01  -.1062997E-01  -.9440549E-02  -.7378686E-02
  -.5116823E-02  -.3369868E-02  -.2646098E-02  -.2978104E-02  -.3901260E-02
  -.4811270E-02  -.5328928E-02  -.5344771E-02  -.4945541E-02  -.4289877E-02
  -.3510567E-02  -.2696031E-02  -.1894498E-02  -.1158620E-02  -.5699136E-03
  -.2047256E-03  -.1114201E-03  -.2888303E-03  -.7296339E-03  -.1411113E-02
  -.2325977E-02  -.3484814E-02  -.4831958E-02  -.6222214E-02  -.7490601E-02
  -.8578046E-02  -.9499433E-02  -.1027958E-01  -.1092414E-01  -.1134571E-01
  -.1140237E-01  -.1093137E-01  -.9813090E-02  -.8076638E-02  -.5889606E-02
  -.3561071E-02  -.1527688E-02  -.2785780E-03  -.1436876E-03  -.1091588E-02
  -.2685607E-02  -.4257338E-02  -.5200503E-02  -.5123695E-02  -.3936436E-02
  -.1835404E-02   .7174938E-03   .3137757E-02   .4863154E-02   .5547977E-02
   .5279668E-02   .4452800E-02   .3570215E-02   .2984122E-02   .2714253E-02
   .2499754E-02   .2001314E-02   .1040751E-02  -.3187064E-03  -.1877995E-02
  -.3395549E-02  -.4610487E-02  -.5262545E-02  -.5123845E-02  -.4148225E-02
  -.2644708E-02  -.1166852E-02  -.2365594E-03  -.1529640E-03  -.1021819E-02
  -.2675545E-02  -.4649841E-02  -.6364620E-02  -.7371843E-02  -.7365893E-02
  -.6227051E-02  -.4104613E-02  -.1358294E-02   .1535706E-02   .4141856E-02
   .6169121E-02   .7508488E-02   .8161889E-02   .8255721E-02   .8089468E-02
   .7978072E-02   .8071442E-02   .8270792E-02   .8312528E-02   .7898009E-02
   .6879916E-02   .5386795E-02   .3763033E-02   .2413977E-02   .1645430E-02
   .1554414E-02   .1980200E-02   .2537216E-02   .2782244E-02   .2397106E-02
   .1317861E-02  -.2247508E-03  -.1908742E-02  -.3511321E-02  -.4921427E-02
  -.6080980E-02  -.6918879E-02  -.7349348E-02  -.7325781E-02  -.6941149E-02
  -.6493683E-02  -.6372088E-02  -.6821360E-02  -.7951523E-02  -.9766803E-02
  -.1210148E-01  -.1464796E-01  -.1696065E-01  -.1855066E-01  -.1909955E-01
  -.1856250E-01  -.1707051E-01  -.1487291E-01  -.1230806E-01  -.9751660E-02
  -.7535750E-02  -.5841374E-02  -.4670759E-02  -.3926433E-02  -.3506801E-02
  -.3325786E-02  -.3287016E-02  -.3258204E-02  -.3073579E-02  -.2673070E-02
  -.2183437E-02  -.1818032E-02  -.1790973E-02  -.2167270E-02  -.2799330E-02
  -.3406089E-02  -.3677492E-02  -.3335692E-02  -.2303414E-02  -.7753485E-03
   .8724378E-03   .2223992E-02   .3052883E-02   .3390191E-02   .3391646E-02
   .3261212E-02   .3271492E-02   .3677654E-02   .4539177E-02   .5658003E-02
   .6695460E-02   .7313715E-02   .7306352E-02   .6689465E-02   .5611701E-02
   .4287687E-02   .2974154E-02   .1876619E-02   .1125296E-02   .6522201E-03
   .1953398E-03  -.5272080E-03  -.1604446E-02  -.2806522E-02  -.3711245E-02
  -.3954605E-02  -.3397419E-02  -.2198206E-02  -.7720561E-03   .3663058E-03
   .7485706E-03   .6028993E-04  -.1701575E-02  -.4156424E-02  -.6745063E-02
  -.8974253E-02  -.1056240E-01  -.1146936E-01  -.1186754E-01  -.1198886E-01
  -.1202287E-01  -.1209742E-01  -.1227024E-01  -.1251862E-01  -.1272912E-01
  -.1272563E-01  -.1240875E-01  -.1181798E-01  -.1102089E-01  -.1004616E-01
  -.8930309E-02  -.7683830E-02  -.6346617E-02  -.5029191E-02  -.3871483E-02
  -.2966496E-02  -.2261974E-02  -.1634428E-02  -.1013447E-02  -.4574516E-03
  -.7145946E-04   .4018336E-04  -.1930914E-03  -.7268378E-03  -.1434295E-02
  -.2203086E-02  -.2943109E-02  -.3524480E-02  -.3825531E-02  -.3806553E-02
  -.3530045E-02  -.3151827E-02  -.2824795E-02  -.2565825E-02  -.2263694E-02
  -.1777536E-02  -.1098876E-02  -.3775311E-03   .1312777E-03   .1186475E-03
  -.6471715E-03  -.2121460E-02  -.3929468E-02  -.5534385E-02  -.6412121E-02
  -.6258396E-02  -.5147858E-02  -.3517732E-02  -.1907628E-02  -.7685425E-03
  -.3891858E-03  -.8083221E-03  -.1751937E-02  -.2700828E-02  -.3150189E-02
  -.2869620E-02  -.1979999E-02  -.9453303E-03  -.3668874E-03  -.6850045E-03
  -.2019238E-02  -.4191582E-02  -.6827627E-02  -.9364604E-02  -.1115801E-01
  -.1171120E-01  -.1091551E-01  -.9073354E-02  -.6769104E-02  -.4681252E-02
  -.3349550E-02  -.2974282E-02  -.3304040E-02  -.3782236E-02  -.3802879E-02
  -.3042419E-02  -.1611833E-02   .1293702E-03   .1788638E-02   .3007044E-02
   .3610188E-02   .3610537E-02   .3175402E-02   .2606039E-02   .2193518E-02
   .2084473E-02   .2284543E-02   .2721205E-02   .3279229E-02   .3886781E-02
   .4597911E-02   .5511129E-02   .6621406E-02   .7775375E-02   .8780461E-02
   .9488811E-02   .9819827E-02   .9749490E-02   .9392186E-02   .8972755E-02
   .8690510E-02   .8580803E-02   .8465087E-02   .8144466E-02   .7582279E-02
   .6807985E-02   .5780494E-02   .4484080E-02   .3046089E-02   .1749155E-02
   .9286333E-03   .7632162E-03   .1199949E-02   .2007679E-02   .2869257E-02
   .3445365E-02   .3511090E-02   .3042921E-02   .2206957E-02   .1255077E-02
   .3057873E-03  -.6808099E-03  -.1790214E-02  -.3019289E-02  -.4250653E-02
  -.5265410E-02  -.5847506E-02  -.5933573E-02  -.5636952E-02  -.5207066E-02
  -.4918572E-02  -.4973059E-02  -.5508087E-02  -.6600086E-02  -.8230640E-02
  -.1026027E-01  -.1243807E-01  -.1439906E-01  -.1569266E-01  -.1597390E-01
  -.1521519E-01  -.1373483E-01  -.1195927E-01  -.1020387E-01  -.8650501E-02
  -.7340756E-02  -.6256337E-02  -.5359372E-02  -.4565169E-02  -.3877178E-02
  -.3371387E-02  -.3135700E-02  -.3154237E-02  -.3240397E-02  -.3179071E-02
  -.2843577E-02  -.2284391E-02  -.1739024E-02  -.1490244E-02  -.1759264E-02
  -.2566426E-02  -.3600941E-02  -.4317956E-02  -.4252653E-02  -.3296464E-02
  -.1755269E-02  -.1825682E-03   .8627081E-03   .1032105E-02   .3674899E-03
  -.6997311E-03  -.1534993E-02  -.1668860E-02  -.9609995E-03   .4269317E-03
   .2131447E-02   .3629983E-02   .4384112E-02   .4117212E-02   .2996865E-02
   .1536015E-02   .3397398E-03  -.1760320E-03   .9452276E-05   .6485126E-03
   .1417537E-02   .2027423E-02   .2287531E-02   .2194119E-02   .1887525E-02
   .1492243E-02   .1036965E-02   .4618625E-03  -.3012004E-03  -.1316890E-02
  -.2597477E-02  -.3969461E-02  -.5167738E-02  -.5911247E-02  -.5987599E-02
  -.5394540E-02  -.4382328E-02  -.3301540E-02  -.2455133E-02  -.1988386E-02
  -.1811493E-02  -.1704370E-02  -.1419335E-02  -.7999008E-03   .8727355E-04
   .9218354E-03   .1336796E-02   .1128632E-02   .3987515E-03  -.4941496E-03
  -.1132811E-02  -.1162462E-02  -.4610416E-03   .7447172E-03   .1966947E-02
   .2711220E-02   .2706686E-02   .1933024E-02   .6112744E-03  -.8521035E-03
  -.2040001E-02  -.2718323E-02  -.2951548E-02  -.2987648E-02  -.3057429E-02
  -.3211320E-02  -.3346349E-02  -.3323112E-02  -.2985920E-02  -.2214965E-02
  -.1051177E-02   .2973262E-03   .1616821E-02   .2794343E-02   .3759060E-02
   .4475313E-02   .4911906E-02   .5089237E-02   .5098886E-02   .5047308E-02
   .5071199E-02   .5311181E-02   .5795574E-02   .6398087E-02   .6922715E-02
   .7124908E-02   .6866906E-02   .6281436E-02   .5607675E-02   .4957415E-02
   .4256294E-02   .3342536E-02   .2037711E-02   .2779536E-03  -.1828483E-02
  -.4005686E-02  -.5855499E-02  -.7016603E-02  -.7240417E-02  -.6523249E-02
  -.5129654E-02  -.3491619E-02  -.2056658E-02  -.1058097E-02  -.4377145E-03
   .1179395E-04   .5098967E-03   .1160378E-02   .1922807E-02   .2741291E-02
   .3649421E-02   .4731637E-02   .5985454E-02   .7216571E-02   .8080775E-02
   .8258169E-02   .7549865E-02   .6015239E-02   .4068463E-02   .2322274E-02
   .1319680E-02   .1372922E-02   .2534487E-02   .4544254E-02   .6816087E-02
   .8622876E-02   .9496873E-02   .9431499E-02   .8771788E-02   .8024961E-02
   .7767284E-02   .8506468E-02   .1041409E-01   .1320752E-01   .1625775E-01
   .1882614E-01   .2029884E-01   .2034391E-01   .1900856E-01   .1671980E-01
   .1411030E-01   .1174638E-01   .9965768E-02   .8870680E-02   .8315115E-02
   .7979765E-02   .7585118E-02   .6980360E-02   .6193218E-02   .5451519E-02
   .5117920E-02   .5491385E-02   .6612457E-02   .8229949E-02   .9899714E-02
   .1106622E-01   .1130401E-01   .1047968E-01   .8835597E-02   .6936206E-02
   .5400292E-02   .4601559E-02   .4557839E-02   .4945316E-02   .5192972E-02
   .4750940E-02   .3390495E-02   .1290588E-02  -.1023539E-02  -.2864887E-02
  -.3676972E-02  -.3323030E-02  -.2060755E-02  -.3328549E-03   .1406462E-02
   .2826201E-02   .3770456E-02   .4300629E-02   .4658898E-02   .5173533E-02
   .6172493E-02   .7857875E-02   .1007739E-01   .1227793E-01   .1381057E-01
   .1420804E-01   .1336595E-01   .1153332E-01   .9119594E-02   .6536698E-02
   .4126349E-02   .2067506E-02   .3799028E-03  -.1086966E-02  -.2585684E-02
  -.4330327E-02  -.6359440E-02  -.8454731E-02  -.1027406E-01  -.1158694E-01
  -.1230508E-01  -.1243767E-01  -.1208759E-01  -.1147291E-01  -.1084581E-01
  -.1032144E-01  -.9896324E-02  -.9574316E-02  -.9425145E-02  -.9596107E-02
  -.1019389E-01  -.1115246E-01  -.1223988E-01  -.1308579E-01  -.1327705E-01
  -.1260163E-01  -.1118459E-01  -.9480631E-02  -.8080080E-02  -.7450429E-02
  -.7732688E-02  -.8669380E-02  -.9683186E-02  -.1016439E-01  -.9765063E-02
  -.8483180E-02  -.6633488E-02  -.4700810E-02  -.3143227E-02  -.2191212E-02
  -.1755622E-02  -.1534376E-02  -.1156118E-02  -.3290754E-03   .1007964E-02
   .2631666E-02   .4080142E-02   .4867069E-02   .4720131E-02   .3659118E-02
   .2047225E-02   .4823373E-03  -.4492674E-03  -.4337051E-03   .5401616E-03
   .2270736E-02   .4321759E-02   .6149661E-02   .7357641E-02   .7914260E-02
   .8065850E-02   .8152604E-02   .8411371E-02   .8798742E-02   .9029470E-02
   .8811088E-02   .8035611E-02   .6769211E-02   .5107546E-02   .3153694E-02
   .1114766E-02  -.6730799E-03  -.1876775E-02  -.2346250E-02  -.2218024E-02
  -.1818450E-02  -.1535580E-02  -.1613441E-02  -.1996861E-02  -.2459149E-02
  -.2797729E-02  -.2994402E-02  -.3103808E-02  -.3090283E-02  -.2811086E-02
  -.2116475E-02  -.9283910E-03   .7614018E-03   .2848480E-02   .5062258E-02
   .6963012E-02   .8033970E-02   .7978205E-02   .6875658E-02   .5074788E-02
   .3021729E-02   .1170165E-02  -.1218076E-03  -.6724450E-03  -.5101754E-03
   .1862294E-03   .1206071E-02   .2254339E-02   .2979176E-02   .3182391E-02
   .2900074E-02   .2352377E-02   .1885011E-02   .1869443E-02   .2450567E-02
   .3448246E-02   .4467676E-02   .5097172E-02   .5079642E-02   .4343286E-02
   .2940508E-02   .1034380E-02  -.1114269E-02  -.3211503E-02  -.4980558E-02
  -.6200234E-02  -.6729511E-02  -.6588507E-02  -.5935710E-02  -.4911688E-02
  -.3730484E-02  -.2680190E-02  -.1888237E-02  -.1281184E-02  -.6740064E-03
   .1083127E-03   .1111058E-02   .2217084E-02   .3191875E-02   .3815887E-02
   .4010827E-02   .3882788E-02   .3621452E-02   .3438796E-02   .3483541E-02
   .3834826E-02   .4576554E-02   .5727578E-02   .7156061E-02   .8644798E-02
   .9995139E-02   .1108536E-01   .1184374E-01   .1218958E-01   .1207598E-01
   .1154432E-01   .1078168E-01   .1007283E-01   .9650666E-02   .9528716E-02
   .9536889E-02   .9436933E-02   .9069973E-02   .8424949E-02   .7571187E-02
   .6554991E-02   .5461381E-02   .4467736E-02   .3706308E-02   .3162727E-02
   .2651184E-02   .1855252E-02   .5067751E-03  -.1372422E-02  -.3464499E-02
  -.5339274E-02  -.6650754E-02  -.7240258E-02  -.7185787E-02  -.6729808E-02
  -.6171486E-02  -.5771063E-02  -.5659831E-02  -.5783296E-02  -.5950096E-02
  -.5990193E-02  -.5863320E-02  -.5667709E-02  -.5564388E-02  -.5681614E-02
  -.6056449E-02  -.6610915E-02  -.7176924E-02  -.7564309E-02  -.7594867E-02
  -.7175757E-02  -.6402855E-02  -.5435410E-02  -.4366573E-02  -.3247190E-02
  -.2177473E-02  -.1256989E-02  -.4135547E-03   .5458329E-03   .1734797E-02
   .3078210E-02   .4328345E-02   .5146311E-02   .5338502E-02   .4981253E-02
   .4371990E-02   .3903101E-02   .3871218E-02   .4370297E-02   .5260366E-02
   .6247173E-02   .6993236E-02   .7208519E-02   .6818574E-02   .6033709E-02
   .5138730E-02   .4274253E-02   .3519679E-02   .2990381E-02   .2743053E-02
   .2746913E-02   .2926109E-02   .3164035E-02   .3422948E-02   .3772680E-02
   .4302786E-02   .5065233E-02   .5993372E-02   .6884911E-02   .7510734E-02
   .7736718E-02   .7599791E-02   .7191265E-02   .6628232E-02   .6032044E-02
   .5482646E-02   .5058919E-02   .4894055E-02   .5159905E-02   .5964982E-02
   .7185780E-02   .8541964E-02   .9723439E-02   .1049945E-01   .1077061E-01
   .1054080E-01   .9891499E-02   .9012681E-02   .8168160E-02   .7581634E-02
   .7307182E-02   .7249284E-02   .7205010E-02   .7055597E-02   .6902341E-02
   .6868406E-02   .6994577E-02   .7242878E-02   .7572125E-02   .7920556E-02
   .8183256E-02   .8190518E-02   .7771303E-02   .6911385E-02   .5836447E-02
   .4931982E-02   .4567046E-02   .4952411E-02   .6044817E-02   .7517735E-02
   .8891767E-02   .9751635E-02   .9912986E-02   .9425742E-02   .8458968E-02
   .7199998E-02   .5815538E-02   .4375269E-02   .2895978E-02   .1422377E-02
   .2036914E-04  -.1224035E-02  -.2213944E-02  -.2856107E-02  -.3073095E-02
  -.2907189E-02  -.2572558E-02  -.2322647E-02  -.2292797E-02  -.2485349E-02
  -.2767069E-02  -.2905523E-02  -.2623879E-02  -.1821822E-02  -.6968801E-03
   .3899062E-03   .1088157E-02   .1289240E-02   .1195446E-02   .1169213E-02
   .1512312E-02   .2321207E-02   .3426263E-02   .4428428E-02   .4895843E-02
   .4550409E-02   .3335227E-02   .1456922E-02  -.6488297E-03  -.2473957E-02
  -.3652503E-02  -.4092260E-02  -.3930310E-02  -.3526692E-02  -.3352857E-02
  -.3732585E-02  -.4699418E-02  -.6046074E-02  -.7446418E-02  -.8636972E-02
  -.9521259E-02  -.1016066E-01  -.1069364E-01  -.1121401E-01  -.1173188E-01
  -.1219017E-01  -.1246964E-01  -.1239169E-01  -.1184950E-01  -.1086723E-01
  -.9556662E-02  -.8086024E-02  -.6670203E-02  -.5508274E-02  -.4728025E-02
  -.4422778E-02  -.4634067E-02  -.5261216E-02  -.6035190E-02  -.6632728E-02
  -.6808753E-02  -.6460654E-02  -.5674869E-02  -.4681698E-02  -.3706288E-02
  -.2907545E-02  -.2373430E-02  -.2132191E-02  -.2171764E-02  -.2470536E-02
  -.3060926E-02  -.4034117E-02  -.5399342E-02  -.7014400E-02  -.8589601E-02
  -.9764175E-02  -.1030049E-01  -.1019247E-01  -.9678978E-02  -.9127569E-02
  -.8865256E-02  -.9019302E-02  -.9510925E-02  -.1010217E-01  -.1044852E-01
  -.1025150E-01  -.9339539E-02  -.7686508E-02  -.5464183E-02  -.3048765E-02
  -.9362233E-03   .5041830E-03   .1180608E-02   .1217143E-02   .8648460E-03
   .4454751E-03   .3006183E-03   .6309924E-03   .1349123E-02   .2126340E-02
   .2571115E-02   .2424236E-02   .1666886E-02   .5258395E-03  -.5989682E-03
  -.1364347E-02  -.1613929E-02  -.1341253E-02  -.6415715E-03   .2811087E-03
   .1155643E-02   .1811364E-02   .2286964E-02   .2722677E-02   .3288667E-02
   .4095356E-02   .5050867E-02   .5876106E-02   .6236547E-02   .5883792E-02
   .4736874E-02   .2976848E-02   .1012360E-02  -.6709911E-03  -.1685390E-02
  -.1921008E-02  -.1534077E-02  -.8039083E-03  -.2356178E-04   .5923186E-03
   .9542711E-03   .1011467E-02   .7877037E-03   .4406867E-03   .1939320E-03
   .1675780E-03   .3306066E-03   .5523080E-03   .6594334E-03   .5169771E-03
   .4994469E-04  -.7654020E-03  -.1852799E-02  -.2980929E-02  -.3888803E-02
  -.4384138E-02  -.4381285E-02  -.3931189E-02  -.3169520E-02  -.2240166E-02
  -.1282888E-02  -.4487858E-03   .1055437E-03   .2036150E-03  -.2786323E-03
  -.1300900E-02  -.2600955E-02  -.3763933E-02  -.4456664E-02  -.4537354E-02
  -.4009477E-02  -.3035889E-02  -.1866751E-02  -.7330052E-03   .2237607E-03
   .1061611E-02   .1942062E-02   .2963765E-02   .4074508E-02   .5083335E-02
   .5761051E-02   .5981180E-02   .5747014E-02   .5138913E-02   .4302185E-02
   .3362320E-02   .2381261E-02   .1398990E-02   .4691439E-03  -.4068050E-03
  -.1289034E-02  -.2231984E-02  -.3207034E-02  -.4124144E-02  -.4892007E-02
  -.5425656E-02  -.5673083E-02  -.5673165E-02  -.5572005E-02  -.5579836E-02
  -.5856596E-02  -.6415226E-02  -.7086765E-02  -.7576052E-02  -.7625431E-02
  -.7241543E-02  -.6664984E-02  -.6161100E-02  -.5900795E-02  -.5892220E-02
  -.6004210E-02  -.5992784E-02  -.5639349E-02  -.4844720E-02  -.3665883E-02
  -.2293812E-02  -.9946868E-03   .1258702E-04   .5762900E-03   .6524717E-03
   .3682326E-03  -.3294142E-04  -.3093958E-03  -.3200132E-03  -.1142420E-03
   .1259777E-03   .1983253E-03  -.5803058E-04  -.7323928E-03  -.1787777E-02
  -.3036557E-02  -.4230345E-02  -.5192320E-02  -.5898216E-02  -.6460589E-02
  -.7035844E-02  -.7735878E-02  -.8582350E-02  -.9528780E-02  -.1048471E-01
  -.1135687E-01  -.1206707E-01  -.1258781E-01  -.1300584E-01  -.1345232E-01
  -.1401752E-01  -.1471388E-01  -.1546942E-01  -.1610057E-01  -.1639937E-01
  -.1619446E-01  -.1533953E-01  -.1380041E-01  -.1174831E-01  -.9454438E-02
  -.7185832E-02  -.5159053E-02  -.3553754E-02  -.2486864E-02  -.1977905E-02
  -.1959155E-02  -.2341025E-02  -.3038265E-02  -.3929908E-02  -.4812398E-02
  -.5461860E-02  -.5715807E-02  -.5412511E-02  -.4396905E-02  -.2665562E-02
  -.4466744E-03   .1837578E-02   .3620037E-02   .4365110E-02   .3828731E-02
   .2137219E-02  -.2642071E-03  -.2814358E-02  -.4991208E-02  -.6446976E-02
  -.7153653E-02  -.7351829E-02  -.7338830E-02  -.7266343E-02  -.7154970E-02
  -.6998887E-02  -.6789711E-02  -.6528965E-02  -.6223150E-02  -.5880077E-02
  -.5543859E-02  -.5283537E-02  -.5180035E-02  -.5286600E-02  -.5533053E-02
  -.5733738E-02  -.5726012E-02  -.5502350E-02  -.5198678E-02  -.4996331E-02
  -.4986493E-02  -.5118619E-02  -.5314003E-02  -.5546581E-02  -.5822636E-02
  -.6140122E-02  -.6418363E-02  -.6570419E-02  -.6576078E-02  -.6477600E-02
  -.6312509E-02  -.6064757E-02  -.5716482E-02  -.5331804E-02  -.4987819E-02
  -.4709380E-02  -.4500635E-02  -.4351693E-02  -.4239894E-02  -.4107954E-02
  -.3899531E-02  -.3662586E-02  -.3514310E-02  -.3497576E-02  -.3526446E-02
  -.3505107E-02  -.3446788E-02  -.3448822E-02  -.3630895E-02  -.4130606E-02
  -.5028806E-02  -.6315194E-02  -.7824424E-02  -.9244677E-02  -.1031375E-01
  -.1094352E-01  -.1118417E-01  -.1106215E-01  -.1058426E-01  -.9843599E-02
  -.8969066E-02  -.8150617E-02  -.7586512E-02  -.7358118E-02  -.7395302E-02
  -.7554297E-02  -.7719082E-02  -.7812729E-02  -.7776674E-02  -.7571362E-02
  -.7117343E-02  -.6288588E-02  -.5114211E-02  -.3810606E-02  -.2715930E-02
  -.2165571E-02  -.2339407E-02  -.3217281E-02  -.4561097E-02  -.5935110E-02
  -.6852002E-02  -.7034135E-02  -.6479804E-02  -.5390876E-02  -.4066751E-02
  -.2816490E-02  -.1936031E-02  -.1585891E-02  -.1751846E-02  -.2312995E-02
  -.3105285E-02  -.3963861E-02  -.4751555E-02  -.5422149E-02  -.6017026E-02
  -.6614611E-02  -.7285129E-02  -.8024216E-02  -.8730048E-02  -.9290420E-02
  -.9656710E-02  -.9830894E-02  -.9830708E-02  -.9659721E-02  -.9252829E-02
  -.8527812E-02  -.7521199E-02  -.6444195E-02  -.5527274E-02  -.4860718E-02
  -.4374749E-02  -.3961949E-02  -.3570765E-02  -.3211075E-02  -.2929273E-02
  -.2782717E-02  -.2830751E-02  -.3003075E-02  -.3070669E-02  -.2750377E-02
  -.1843610E-02  -.3893092E-03   .1316021E-02   .2815690E-02   .3620477E-02
   .3419959E-02   .2210673E-02   .2003164E-03  -.2284017E-02  -.4830371E-02
  -.7076022E-02  -.8798434E-02  -.9959998E-02  -.1065130E-01  -.1101228E-01
  -.1110684E-01  -.1091943E-01  -.1047456E-01  -.9799365E-02  -.8897206E-02
  -.7830595E-02  -.6758701E-02  -.5908972E-02  -.5437265E-02  -.5353302E-02
  -.5541617E-02  -.5930511E-02  -.6518183E-02  -.7227392E-02  -.7916155E-02
  -.8409657E-02  -.8504164E-02  -.8116234E-02  -.7322781E-02  -.6283987E-02
  -.5196308E-02  -.4191505E-02  -.3334706E-02  -.2629292E-02  -.2083041E-02
  -.1758969E-02  -.1683408E-02  -.1806525E-02  -.1941931E-02  -.1867168E-02
  -.1498031E-02  -.8347461E-03   .1009136E-03   .1210743E-02   .2232788E-02
   .2790965E-02   .2643353E-02   .1812721E-02   .5322094E-03  -.9169956E-03
  -.2305559E-02  -.3463871E-02  -.4284129E-02  -.4721164E-02  -.4790222E-02
  -.4593274E-02  -.4299509E-02  -.4026776E-02  -.3808659E-02  -.3655067E-02
  -.3533777E-02  -.3299488E-02  -.2826189E-02  -.2163872E-02  -.1527932E-02
  -.1166096E-02  -.1252290E-02  -.1776580E-02  -.2564115E-02  -.3380978E-02
  -.4034544E-02  -.4464488E-02  -.4717220E-02  -.4838846E-02  -.4841792E-02
  -.4757926E-02  -.4641278E-02  -.4522155E-02  -.4401467E-02  -.4231258E-02
  -.3949798E-02  -.3565402E-02  -.3128416E-02  -.2600572E-02  -.1881167E-02
  -.9701665E-03  -.1216044E-04   .7540488E-03   .1186249E-02   .1342209E-02
   .1367370E-02   .1387263E-02   .1452581E-02   .1521981E-02   .1574069E-02
   .1642960E-02   .1810384E-02   .2146283E-02   .2605462E-02   .3048895E-02
   .3351427E-02   .3527663E-02   .3682150E-02   .3896362E-02   .4172202E-02
   .4478826E-02   .4766721E-02   .4983880E-02   .5142187E-02   .5264185E-02
   .5356363E-02   .5403659E-02   .5373754E-02   .5225853E-02   .4925022E-02
   .4462145E-02   .3931852E-02   .3520808E-02   .3403103E-02   .3608006E-02
   .4034139E-02   .4553581E-02   .5044960E-02   .5402023E-02   .5530561E-02
   .5333503E-02   .4808387E-02   .4158728E-02   .3750253E-02   .3918929E-02
   .4824892E-02   .6378013E-02   .8227890E-02   .9884978E-02   .1096883E-01
   .1125014E-01   .1065774E-01   .9316597E-02   .7523146E-02   .5652577E-02
   .4015661E-02   .2745210E-02   .1822845E-02   .1151057E-02   .6336632E-03
   .2551753E-03   .3174815E-04  -.7402249E-04  -.1296764E-03  -.1903134E-03
  -.3161346E-03  -.5659879E-03  -.1004307E-02  -.1642533E-02  -.2453401E-02
  -.3369742E-02  -.4278555E-02  -.4982898E-02  -.5199858E-02  -.4742358E-02
  -.3713588E-02  -.2439534E-02  -.1360068E-02  -.8695253E-03  -.1099230E-02
  -.1867684E-02  -.2820668E-02  -.3641027E-02  -.4147323E-02  -.4273293E-02
  -.4014157E-02  -.3431785E-02  -.2621608E-02  -.1643059E-02  -.5560661E-03
   .5164040E-03   .1424068E-02   .2118792E-02   .2653005E-02   .3151549E-02
   .3713671E-02   .4288556E-02   .4772503E-02   .5126770E-02   .5368378E-02
   .5488076E-02   .5444328E-02   .5173568E-02   .4607058E-02   .3752975E-02
   .2747604E-02   .1783728E-02   .9694317E-03   .3444433E-03  -.4333964E-04
  -.1241774E-03   .1285155E-03   .6979054E-03   .1496142E-02   .2333616E-02
   .2995170E-02   .3371695E-02   .3472200E-02   .3325410E-02   .2968258E-02
   .2524010E-02   .2148269E-02   .1852657E-02   .1582595E-02   .1337261E-02
   .1127297E-02   .9151909E-03   .6613586E-03   .3241975E-03  -.1397683E-03
  -.7141025E-03  -.1359659E-02  -.2040518E-02  -.2725173E-02  -.3352601E-02
  -.3825447E-02  -.4012294E-02  -.3743007E-02  -.2936737E-02  -.1733416E-02
  -.4788677E-03   .4083532E-03   .6058832E-03   .8857206E-04  -.9101790E-03
  -.1997112E-02  -.2791989E-02  -.3114280E-02  -.3001372E-02  -.2601573E-02
  -.2062952E-02  -.1443777E-02  -.7440890E-03   .8401862E-04   .1105930E-02
   .2342364E-02   .3759817E-02   .5251024E-02   .6663114E-02   .7859105E-02
   .8706479E-02   .9119640E-02   .9098637E-02   .8662216E-02   .7844521E-02
   .6778409E-02   .5654303E-02   .4625023E-02   .3862381E-02   .3581979E-02
   .3904874E-02   .4761078E-02   .5901345E-02   .6981958E-02   .7736999E-02
   .8094181E-02   .8092767E-02   .7784742E-02   .7205496E-02   .6415784E-02
   .5549261E-02   .4783874E-02   .4288211E-02   .4158427E-02   .4364503E-02
   .4749935E-02   .5128815E-02   .5386220E-02   .5493502E-02   .5450356E-02
   .5243570E-02   .4864711E-02   .4370690E-02   .3885076E-02   .3490584E-02
   .3151087E-02   .2821470E-02   .2527843E-02   .2294521E-02   .2120888E-02
   .1986449E-02   .1852229E-02   .1710114E-02   .1588484E-02   .1501016E-02
   .1486187E-02   .1635238E-02   .2003267E-02   .2599336E-02   .3373412E-02
   .4234967E-02   .5069905E-02   .5811461E-02   .6528783E-02   .7364533E-02
   .8466161E-02   .9936732E-02   .1170163E-01   .1350906E-01   .1504922E-01
   .1601429E-01   .1619450E-01   .1553834E-01   .1418411E-01   .1244838E-01
   .1072446E-01   .9341375E-02   .8472112E-02   .8108287E-02   .8111376E-02
   .8265538E-02   .8360915E-02   .8267946E-02   .7928933E-02   .7352017E-02
   .6628021E-02   .5916500E-02   .5378740E-02   .5170500E-02   .5323336E-02
   .5697358E-02   .6112524E-02   .6419888E-02   .6527131E-02   .6412598E-02
   .6144576E-02   .5857548E-02   .5706028E-02   .5705311E-02   .5710330E-02
   .5579983E-02   .5234086E-02   .4644810E-02   .3852875E-02   .2972143E-02
   .2159630E-02   .1563770E-02   .1294807E-02   .1366311E-02   .1649799E-02
   .1939774E-02   .2127636E-02   .2238937E-02   .2336236E-02   .2466920E-02
   .2719733E-02   .3206135E-02   .3938836E-02   .4822081E-02   .5656615E-02
   .6175312E-02   .6114499E-02   .5337482E-02   .3904696E-02   .2118688E-02
   .4784193E-03  -.5491262E-03  -.7333435E-03  -.9260931E-04   .1189856E-02
   .2807212E-02   .4427062E-02   .5759761E-02   .6640008E-02   .7131468E-02
   .7406488E-02   .7593530E-02   .7731150E-02   .7737821E-02   .7503134E-02
   .6986366E-02   .6276932E-02   .5616506E-02   .5307529E-02   .5579977E-02
   .6452555E-02   .7659853E-02   .8777657E-02   .9388216E-02   .9228967E-02
   .8268703E-02   .6749682E-02   .5088003E-02   .3679263E-02   .2826771E-02
   .2623520E-02   .2906360E-02   .3359097E-02   .3672513E-02   .3658116E-02
   .3277685E-02   .2590868E-02   .1688948E-02   .7292975E-03  -.7945932E-04
  -.5712265E-03  -.6842291E-03  -.4246810E-03   .1534500E-03   .9184107E-03
   .1683410E-02   .2328054E-02   .2839367E-02   .3312561E-02   .3891901E-02
   .4618481E-02   .5423749E-02   .6199004E-02   .6897661E-02   .7552490E-02
   .8228812E-02   .8935241E-02   .9584749E-02   .1008105E-01   .1038851E-01
   .1052383E-01   .1049017E-01   .1027909E-01   .9922417E-02   .9460329E-02
   .8969630E-02   .8545319E-02   .8212423E-02   .7875054E-02   .7405985E-02
   .6799966E-02   .6149312E-02   .5566892E-02   .5177009E-02   .5094223E-02
   .5365866E-02   .5928385E-02   .6587486E-02   .7118955E-02   .7348454E-02
   .7201004E-02   .6736616E-02   .6046697E-02   .5207708E-02   .4321197E-02
   .3435040E-02   .2564852E-02   .1748817E-02   .1054949E-02   .4798153E-03
  -.5729146E-04  -.6622042E-03  -.1458179E-02  -.2508328E-02  -.3803464E-02
  -.5268416E-02  -.6761923E-02  -.8095325E-02  -.9056386E-02  -.9404792E-02
  -.9010647E-02  -.7972546E-02  -.6528302E-02  -.4925638E-02  -.3375716E-02
  -.2033220E-02  -.9840028E-03  -.2487512E-03   .2344936E-03   .6058901E-03
   .9440248E-03   .1268878E-02   .1659289E-02   .2221567E-02   .2980525E-02
   .3843506E-02   .4680631E-02   .5461626E-02   .6243683E-02   .7048075E-02
   .7802033E-02   .8435307E-02   .8886013E-02   .9074134E-02   .8908141E-02
   .8349247E-02   .7476965E-02   .6475555E-02   .5492953E-02   .4595219E-02
   .3796953E-02   .3085339E-02   .2449714E-02   .1867794E-02   .1345486E-02
   .9166458E-03   .6213101E-03   .4665857E-03   .3949031E-03   .3574467E-03
   .3617860E-03   .4297858E-03   .5509482E-03   .6705415E-03   .6604643E-03
   .3489182E-03  -.3521675E-03  -.1380018E-02  -.2525969E-02  -.3485041E-02
  -.3983435E-02  -.3903658E-02  -.3265544E-02  -.2164012E-02  -.7945464E-03
   .5471820E-03   .1609022E-02   .2286562E-02   .2642178E-02   .2815056E-02
   .2940524E-02   .3117041E-02   .3374962E-02   .3634017E-02   .3794071E-02
   .3809043E-02   .3691816E-02   .3547719E-02   .3539125E-02   .3724986E-02
   .4031518E-02   .4361427E-02   .4625815E-02   .4765497E-02   .4770625E-02
   .4643709E-02   .4424250E-02   .4195957E-02   .4058912E-02   .4112477E-02
   .4456582E-02   .5099207E-02   .5953804E-02   .6869698E-02   .7654119E-02
   .8209592E-02   .8520986E-02   .8573510E-02   .8343579E-02   .7846134E-02
   .7070965E-02   .6041880E-02   .4909807E-02   .3910436E-02   .3305034E-02
   .3337908E-02   .4141895E-02   .5609385E-02   .7399205E-02   .9052667E-02
   .1023390E-01   .1082802E-01   .1087133E-01   .1047601E-01   .9784604E-02
   .8946898E-02   .8146131E-02   .7577429E-02   .7343606E-02   .7368542E-02
   .7528060E-02   .7711659E-02   .7787208E-02   .7650954E-02   .7267802E-02
   .6664486E-02   .5911175E-02   .5136690E-02   .4499339E-02   .4112576E-02
   .4059670E-02   .4369093E-02   .4971869E-02   .5767171E-02   .6588349E-02
   .7209447E-02   .7470893E-02   .7286235E-02   .6641505E-02   .5628938E-02
   .4470422E-02   .3459841E-02   .2880062E-02   .2856109E-02   .3280628E-02
   .3907738E-02   .4441605E-02   .4662824E-02   .4505581E-02   .4013416E-02
   .3335135E-02   .2722150E-02   .2394460E-02   .2416144E-02   .2708865E-02
   .3121292E-02   .3509875E-02   .3721271E-02   .3687772E-02   .3512262E-02
   .3406049E-02   .3560079E-02   .3943415E-02   .4339150E-02   .4587832E-02
   .4674569E-02   .4593943E-02   .4325488E-02   .3913059E-02   .3490968E-02
   .3230114E-02   .3237422E-02   .3457932E-02   .3709880E-02   .3816346E-02
   .3707964E-02   .3363511E-02   .2813463E-02   .2186168E-02   .1658424E-02
   .1391131E-02   .1499378E-02   .1990818E-02   .2753400E-02   .3619058E-02
   .4410209E-02   .4945746E-02   .5131532E-02   .4991419E-02   .4655802E-02
   .4301980E-02   .4068611E-02   .4045883E-02   .4267809E-02   .4697685E-02
   .5145869E-02   .5311423E-02   .4985245E-02   .4158853E-02   .3002879E-02
   .1790688E-02   .7676101E-03   .9690561E-04  -.1855744E-03  -.2041610E-03
  -.1506513E-03  -.1574564E-03  -.2466262E-03  -.3308958E-03  -.2857391E-03
  -.1020237E-03   .1154682E-03   .3093891E-03   .5108451E-03   .7925843E-03
   .1233733E-02   .1860159E-02   .2614636E-02   .3385946E-02   .4065813E-02
   .4576075E-02   .4854889E-02   .4850809E-02   .4507490E-02   .3820251E-02
   .2863814E-02   .1816802E-02   .9019198E-03   .2957134E-03   .1234461E-03
   .4550425E-03   .1212275E-02   .2189418E-02   .3136976E-02   .3852295E-02
   .4235165E-02   .4290264E-02   .4078911E-02   .3678907E-02   .3201926E-02
   .2724024E-02   .2268004E-02   .1844936E-02   .1444864E-02   .9921817E-03
   .3666365E-03  -.4988307E-03  -.1515763E-02  -.2471905E-02  -.3152444E-02
  -.3448042E-02  -.3390508E-02  -.3103856E-02  -.2777300E-02  -.2641351E-02
  -.2907521E-02  -.3707077E-02  -.4916875E-02  -.6179464E-02  -.7097280E-02
  -.7392742E-02  -.6997186E-02  -.6100408E-02  -.5081839E-02  -.4342414E-02
  -.4147233E-02  -.4560155E-02  -.5419802E-02  -.6386893E-02  -.7054710E-02
  -.7073926E-02  -.6289221E-02  -.4824414E-02  -.3002073E-02  -.1237127E-02
   .9685474E-04   .7724268E-03   .7872076E-03   .3360523E-03  -.2678586E-03
  -.7154165E-03  -.8690966E-03  -.7832188E-03  -.5898845E-03  -.4574047E-03
  -.5685953E-03  -.1032629E-02  -.1824225E-02  -.2733888E-02  -.3473201E-02
  -.3903495E-02  -.4022796E-02  -.3870257E-02  -.3532868E-02  -.3111734E-02
  -.2637869E-02  -.2141974E-02  -.1697912E-02  -.1362761E-02  -.1127666E-02
  -.9738635E-03  -.9256175E-03  -.9573583E-03  -.1042931E-02  -.1236894E-02
  -.1583851E-02  -.2030268E-02  -.2471700E-02  -.2832419E-02  -.3029782E-02
  -.2997455E-02  -.2748611E-02  -.2331059E-02  -.1773383E-02  -.1108627E-02
  -.3673023E-03   .4353373E-03   .1281516E-02   .2143269E-02   .2926909E-02
   .3469448E-02   .3645805E-02   .3442715E-02   .2896596E-02   .2106993E-02
   .1231287E-02   .4473624E-03  -.1070150E-03  -.3833790E-03  -.4496859E-03
  -.4821669E-03  -.5167548E-03  -.4539688E-03  -.2592952E-03  -.3286217E-05
   .2428455E-03   .4064745E-03   .4002567E-03   .1828189E-03  -.2844209E-03
  -.9692201E-03  -.1744276E-02  -.2515066E-02  -.3207994E-02  -.3767880E-02
  -.4186933E-02  -.4490575E-02  -.4751148E-02  -.5050035E-02  -.5382927E-02
  -.5699632E-02  -.5934558E-02  -.6055999E-02  -.6135507E-02  -.6273350E-02
  -.6501581E-02  -.6783299E-02  -.7003853E-02  -.7054611E-02  -.6942349E-02
  -.6760912E-02  -.6613707E-02  -.6629183E-02  -.6905412E-02  -.7352861E-02
  -.7743663E-02  -.7822578E-02  -.7429168E-02  -.6596494E-02  -.5577414E-02
  -.4705330E-02  -.4273491E-02  -.4438655E-02  -.5158446E-02  -.6239237E-02
  -.7423747E-02  -.8398095E-02  -.8918678E-02  -.8927708E-02  -.8576123E-02
  -.8185045E-02  -.8037907E-02  -.8215674E-02  -.8653281E-02  -.9206995E-02
  -.9725669E-02  -.1015834E-01  -.1051182E-01  -.1075209E-01  -.1085180E-01
  -.1084024E-01  -.1070331E-01  -.1038712E-01  -.9936477E-02  -.9430467E-02
  -.8927822E-02  -.8484117E-02  -.8149376E-02  -.7925141E-02  -.7755281E-02
  -.7543954E-02  -.7218140E-02  -.6774637E-02  -.6274416E-02  -.5786078E-02
  -.5401715E-02  -.5246740E-02  -.5365114E-02  -.5664240E-02  -.5944548E-02
  -.6030055E-02  -.5876173E-02  -.5572611E-02  -.5306600E-02  -.5286618E-02
  -.5577418E-02  -.6059644E-02  -.6532246E-02  -.6789617E-02  -.6736808E-02
  -.6418521E-02  -.5942746E-02  -.5468752E-02  -.5143816E-02  -.5049420E-02
  -.5215369E-02  -.5594079E-02  -.6042850E-02  -.6397018E-02  -.6522705E-02
  -.6403264E-02  -.6109008E-02  -.5700445E-02  -.5140100E-02  -.4391120E-02
  -.3491862E-02  -.2516312E-02  -.1600296E-02  -.8903912E-03  -.5053382E-03
  -.5528209E-03  -.1038858E-02  -.1826766E-02  -.2713580E-02  -.3506443E-02
  -.4049488E-02  -.4227740E-02  -.4037728E-02  -.3583006E-02  -.3041034E-02
  -.2623684E-02  -.2465032E-02  -.2564559E-02  -.2786493E-02  -.2947450E-02
  -.2954625E-02  -.2798978E-02  -.2547600E-02  -.2301124E-02  -.2177433E-02
  -.2271101E-02  -.2615516E-02  -.3199592E-02  -.3958320E-02  -.4730161E-02
  -.5281705E-02  -.5411026E-02  -.5059399E-02  -.4356307E-02  -.3539387E-02
  -.2876382E-02  -.2548935E-02  -.2599342E-02  -.2922666E-02  -.3327444E-02
  -.3645834E-02  -.3832118E-02  -.3936946E-02  -.4012145E-02  -.4097448E-02
  -.4246115E-02  -.4497187E-02  -.4844558E-02  -.5312590E-02  -.5873358E-02
  -.6468179E-02  -.7102203E-02  -.7748170E-02  -.8305450E-02  -.8696226E-02
  -.8880282E-02  -.8855528E-02  -.8679270E-02  -.8384109E-02  -.7933302E-02
  -.7287329E-02  -.6520757E-02  -.5797943E-02  -.5313917E-02  -.5257606E-02
  -.5687484E-02  -.6508124E-02  -.7560206E-02  -.8677214E-02  -.9706324E-02
  -.1051294E-01  -.1102006E-01  -.1119121E-01  -.1106086E-01  -.1076128E-01
  -.1050619E-01  -.1048275E-01  -.1076799E-01  -.1129209E-01  -.1187528E-01
  -.1233304E-01  -.1252820E-01  -.1237970E-01  -.1189824E-01  -.1118403E-01
  -.1043302E-01  -.9837802E-02  -.9462173E-02  -.9295775E-02  -.9278535E-02
  -.9351479E-02  -.9486502E-02  -.9679063E-02  -.9917625E-02  -.1022679E-01
  -.1070806E-01  -.1143282E-01  -.1229137E-01  -.1306719E-01  -.1360138E-01
  -.1383408E-01  -.1377551E-01  -.1351712E-01  -.1323422E-01  -.1310211E-01
  -.1318043E-01  -.1344365E-01  -.1380093E-01  -.1403546E-01  -.1394313E-01
  -.1340742E-01  -.1245391E-01  -.1123945E-01  -.9973248E-02  -.8866434E-02
  -.8073603E-02  -.7691600E-02  -.7741035E-02  -.8103998E-02  -.8575380E-02
  -.8940657E-02  -.9036360E-02  -.8842948E-02  -.8458481E-02  -.7977209E-02
  -.7438136E-02  -.6863609E-02  -.6304344E-02  -.5842487E-02  -.5549838E-02
  -.5499527E-02  -.5745835E-02  -.6250529E-02  -.6894304E-02  -.7544372E-02
  -.8046034E-02  -.8208752E-02  -.7910326E-02  -.7226243E-02  -.6367905E-02
  -.5626369E-02  -.5231169E-02  -.5291672E-02  -.5800135E-02  -.6644000E-02
  -.7614590E-02  -.8476500E-02  -.9059282E-02  -.9279002E-02  -.9173160E-02
  -.8882728E-02  -.8565034E-02  -.8357017E-02  -.8375744E-02  -.8632718E-02
  -.9030024E-02  -.9464656E-02  -.9875648E-02  -.1023392E-01  -.1052122E-01
  -.1070193E-01  -.1073795E-01  -.1061994E-01  -.1041662E-01  -.1025147E-01
  -.1020105E-01  -.1024579E-01  -.1027660E-01  -.1011844E-01  -.9579232E-02
  -.8569904E-02  -.7150727E-02  -.5472355E-02  -.3755173E-02  -.2200269E-02
  -.9338192E-03   .1054399E-04   .7054392E-03   .1243889E-02   .1717181E-02
   .2221208E-02   .2765353E-02   .3224098E-02   .3476444E-02   .3532183E-02
   .3516476E-02   .3559728E-02   .3735848E-02   .4098338E-02   .4659494E-02
   .5353955E-02   .6022375E-02   .6397892E-02   .6244288E-02   .5540742E-02
   .4475059E-02   .3295808E-02   .2201997E-02   .1275276E-02   .5379862E-03
  -.1852716E-04  -.3826825E-03  -.5545438E-03  -.6314993E-03  -.7184323E-03
  -.8513443E-03  -.1051718E-02  -.1343090E-02  -.1717047E-02  -.2103371E-02
  -.2394772E-02  -.2570332E-02  -.2674680E-02  -.2791523E-02  -.3038847E-02
  -.3435593E-02  -.3870018E-02  -.4222886E-02  -.4445084E-02  -.4536579E-02
  -.4493125E-02  -.4309687E-02  -.4013380E-02  -.3676495E-02  -.3395249E-02
  -.3207329E-02  -.3114399E-02  -.3113549E-02  -.3131488E-02  -.3038208E-02
  -.2700799E-02  -.2065393E-02  -.1221132E-02  -.3484106E-03   .4342880E-03
   .1118682E-02   .1725862E-02   .2265960E-02   .2735688E-02   .3066875E-02
   .3176690E-02   .3009761E-02   .2544861E-02   .1773867E-02   .7351485E-03
  -.3914678E-03  -.1355532E-02  -.1958971E-02  -.2123207E-02  -.1839466E-02
  -.1193486E-02  -.3720067E-03   .4142155E-03   .9958011E-03   .1314022E-02
   .1434287E-02   .1484084E-02   .1533598E-02   .1590200E-02   .1649055E-02
   .1709257E-02   .1778109E-02   .1899801E-02   .2166138E-02   .2670614E-02
   .3435361E-02   .4303950E-02   .5015834E-02   .5354767E-02   .5181108E-02
   .4513803E-02   .3515961E-02   .2444638E-02   .1496055E-02   .7693643E-03
   .3010571E-03   .7687821E-04   .1111489E-03   .3828547E-03   .8221377E-03
   .1366047E-02   .1954680E-02   .2541508E-02   .3046102E-02   .3298948E-02
   .3146308E-02   .2551112E-02   .1565514E-02   .3380211E-03  -.8737339E-03
  -.1771306E-02  -.2117187E-02  -.1882052E-02  -.1219110E-02  -.3443791E-03
   .5036262E-03   .1137833E-02   .1494722E-02   .1591969E-02   .1505183E-02
   .1399681E-02   .1411990E-02   .1532972E-02   .1696364E-02   .1861994E-02
   .1994914E-02   .2081535E-02   .2155783E-02   .2248559E-02   .2333930E-02
   .2385150E-02   .2395869E-02   .2353501E-02   .2267606E-02   .2156215E-02
   .2023689E-02   .1893867E-02   .1789996E-02   .1730648E-02   .1715281E-02
   .1695130E-02   .1579075E-02   .1291855E-02   .8549745E-03   .3754030E-03
  -.7499272E-04  -.4323077E-03  -.6473419E-03  -.7022930E-03  -.6112662E-03
  -.4271867E-03  -.2603566E-03  -.2045835E-03  -.2730519E-03  -.3850215E-03
  -.4753551E-03  -.5486633E-03  -.5836448E-03  -.4799596E-03  -.1677645E-03
   .2917616E-03   .7674492E-03   .1135127E-02   .1321730E-02   .1300865E-02
   .1067165E-02   .6818519E-03   .2699972E-03   .1753987E-04   .9580918E-04
   .5832273E-03   .1439924E-02   .2505990E-02   .3584580E-02   .4516326E-02
   .5252982E-02   .5829136E-02   .6369877E-02   .6992484E-02   .7739919E-02
   .8575743E-02   .9354951E-02   .9915665E-02   .1015566E-01   .1004531E-01
   .9675590E-02   .9259684E-02   .8958334E-02   .8826173E-02   .8846434E-02
   .8872303E-02   .8706731E-02   .8242065E-02   .7467624E-02   .6512044E-02
   .5512589E-02   .4522388E-02   .3581137E-02   .2801324E-02   .2313472E-02
   .2134264E-02   .2160093E-02   .2253180E-02   .2323894E-02   .2320670E-02
   .2190917E-02   .1889427E-02   .1420754E-02   .8712687E-03   .3833598E-03
   .2940074E-04  -.1957226E-03  -.3248500E-03  -.3475595E-03  -.3089553E-03
  -.3541542E-03  -.6457989E-03  -.1250843E-02  -.2057741E-02  -.2804204E-02
  -.3267642E-02  -.3336022E-02  -.2932845E-02  -.2095773E-02  -.1032673E-02
  -.6410683E-04   .4887682E-03   .4764637E-03   .1466693E-04  -.6185511E-03
  -.1150171E-02  -.1468848E-02  -.1597250E-02  -.1638234E-02  -.1701032E-02
  -.1827044E-02  -.1970716E-02  -.2021500E-02  -.1871766E-02  -.1487307E-02
  -.9176043E-03  -.2735565E-03   .2517624E-03   .5081126E-03   .5027087E-03
   .3342663E-03   .1211272E-03  -.2387483E-05   .1469581E-03   .7171959E-03
   .1781788E-02   .3284982E-02   .4917646E-02   .6229422E-02   .6870086E-02
   .6768403E-02   .6110526E-02   .5172137E-02   .4223868E-02   .3518840E-02
   .3191908E-02   .3214347E-02   .3440248E-02   .3694550E-02   .3869866E-02
   .3943481E-02   .3907880E-02   .3757741E-02   .3570726E-02   .3516637E-02
   .3705265E-02   .4061742E-02   .4424917E-02   .4665579E-02   .4718045E-02
   .4690757E-02   .4756269E-02   .4999030E-02   .5458778E-02   .6125321E-02
   .6891786E-02   .7578679E-02   .7966779E-02   .7906477E-02   .7390870E-02
   .6542789E-02   .5550777E-02   .4615280E-02   .3899191E-02   .3469962E-02
   .3317360E-02   .3352049E-02   .3504533E-02   .3785803E-02   .4207355E-02
   .4721683E-02   .5238664E-02   .5717694E-02   .6127695E-02   .6384827E-02
   .6428942E-02   .6238437E-02   .5852036E-02   .5388224E-02   .5028021E-02
   .4970370E-02   .5330666E-02   .6026372E-02   .6791070E-02   .7348952E-02
   .7566173E-02   .7493959E-02   .7222309E-02   .6796495E-02   .6313938E-02
   .5909285E-02   .5637383E-02   .5482515E-02   .5399642E-02   .5334077E-02
   .5245799E-02   .5128141E-02   .4970775E-02   .4788025E-02   .4627388E-02
   .4530569E-02   .4489859E-02   .4438977E-02   .4213789E-02   .3693690E-02
   .2938022E-02   .2152141E-02   .1585940E-02   .1424767E-02   .1733039E-02
   .2415695E-02   .3242048E-02   .3941093E-02   .4381159E-02   .4579045E-02
   .4573411E-02   .4384166E-02   .4086126E-02   .3852856E-02   .3832875E-02
   .4050036E-02   .4401657E-02   .4756208E-02   .5011434E-02   .5135479E-02
   .5140839E-02   .5050128E-02   .4923377E-02   .4892867E-02   .5081534E-02
   .5514642E-02   .6138684E-02   .6869880E-02   .7670496E-02   .8524807E-02
   .9365295E-02   .1007900E-01   .1057978E-01   .1088809E-01   .1111570E-01
   .1138328E-01   .1176536E-01   .1223125E-01   .1265997E-01   .1293514E-01
   .1301723E-01   .1289690E-01   .1253955E-01   .1197701E-01   .1133280E-01
   .1075622E-01   .1041051E-01   .1036384E-01   .1053565E-01   .1076459E-01
   .1087383E-01   .1078930E-01   .1055757E-01   .1024584E-01   .9922840E-02
   .9640772E-02   .9482155E-02   .9484632E-02   .9605073E-02   .9783821E-02
   .9963776E-02   .1007969E-01   .1003343E-01   .9796551E-02   .9448787E-02
   .9111890E-02   .8892286E-02   .8827606E-02   .8874070E-02   .8957461E-02
   .8954552E-02   .8773539E-02   .8417533E-02   .7930050E-02   .7394157E-02
   .6951961E-02   .6742551E-02   .6825966E-02   .7123185E-02   .7429630E-02
   .7539109E-02   .7365335E-02   .6955803E-02   .6403718E-02   .5841196E-02
   .5461445E-02   .5396726E-02   .5629632E-02   .5989956E-02   .6290686E-02
   .6384739E-02   .6198849E-02   .5765539E-02   .5226800E-02   .4759943E-02
   .4508873E-02   .4516118E-02   .4719377E-02   .4995161E-02   .5224648E-02
   .5330510E-02   .5255693E-02   .5014072E-02   .4695277E-02   .4431962E-02
   .4332126E-02   .4442507E-02   .4802060E-02   .5366511E-02   .6036718E-02
   .6723597E-02   .7306118E-02   .7680502E-02   .7832406E-02   .7789565E-02
   .7571822E-02   .7217455E-02   .6813954E-02   .6484120E-02   .6284046E-02
   .6199477E-02   .6159913E-02   .6135510E-02   .6180389E-02   .6330987E-02
   .6554451E-02   .6823346E-02   .7088788E-02   .7272863E-02   .7273828E-02
   .7027225E-02   .6554584E-02   .5899864E-02   .5152807E-02   .4441000E-02
   .3864502E-02   .3448052E-02   .3192711E-02   .3115866E-02   .3235644E-02
   .3571437E-02   .4115793E-02   .4768955E-02   .5411060E-02   .5900289E-02
   .6118732E-02   .6003278E-02   .5573621E-02   .4908793E-02   .4159169E-02
   .3533237E-02   .3159266E-02   .3048674E-02   .3128299E-02   .3312559E-02
   .3532372E-02   .3728476E-02   .3896642E-02   .4070702E-02   .4266822E-02
   .4405521E-02   .4422581E-02   .4353052E-02   .4229791E-02   .4057421E-02
   .3856798E-02   .3700536E-02   .3691761E-02   .3892242E-02   .4311841E-02
   .4892152E-02   .5547857E-02   .6236491E-02   .6893051E-02   .7384434E-02
   .7597431E-02   .7515855E-02   .7207948E-02   .6800775E-02   .6444508E-02
   .6232017E-02   .6207666E-02   .6390311E-02   .6676570E-02   .6911574E-02
   .6998671E-02   .6874529E-02   .6564529E-02   .6248507E-02   .6093606E-02
   .6121094E-02   .6274244E-02   .6437117E-02   .6495796E-02   .6416498E-02
   .6243134E-02   .6022291E-02   .5801058E-02   .5671519E-02   .5723779E-02
   .5983390E-02   .6316075E-02   .6541699E-02   .6592835E-02   .6468759E-02
   .6239398E-02   .6097011E-02   .6182862E-02   .6466838E-02   .6850184E-02
   .7214342E-02   .7439469E-02   .7431827E-02   .7142729E-02   .6613807E-02
   .5912251E-02   .5165485E-02   .4562973E-02   .4240446E-02   .4228999E-02
   .4478192E-02   .4899117E-02   .5358362E-02   .5730721E-02   .5919577E-02
   .5924882E-02   .5844246E-02   .5766050E-02   .5725203E-02   .5681053E-02
   .5601248E-02   .5540428E-02   .5580316E-02   .5726746E-02   .5913259E-02
   .6072802E-02   .6133090E-02   .6003048E-02   .5639146E-02   .5064526E-02
   .4372600E-02   .3724052E-02   .3276983E-02   .3138268E-02   .3360870E-02
   .3874891E-02   .4542347E-02   .5244183E-02   .5890803E-02   .6473737E-02
   .7017670E-02   .7513895E-02   .7929821E-02   .8255618E-02   .8490168E-02
   .8637990E-02   .8677609E-02   .8523166E-02   .8107701E-02   .7522095E-02
   .6938201E-02   .6520698E-02   .6322243E-02   .6292623E-02   .6367404E-02
   .6454866E-02   .6447916E-02   .6303140E-02   .6008316E-02   .5532970E-02
   .4882695E-02   .4101561E-02   .3238757E-02   .2383069E-02   .1639202E-02
   .1055441E-02   .6301833E-03   .3791533E-03   .2937811E-03   .2858518E-03
   .2412964E-03   .5199904E-04  -.3186352E-03  -.8426524E-03  -.1474657E-02
  -.2071853E-02  -.2521985E-02  -.2817476E-02  -.2984496E-02  -.3068168E-02
  -.3096340E-02  -.3082366E-02  -.2975596E-02  -.2711228E-02  -.2233521E-02
  -.1520759E-02  -.6400786E-03   .2751859E-03   .1079933E-02   .1654765E-02
   .2012213E-02   .2225304E-02   .2359238E-02   .2491601E-02   .2670675E-02
   .2909413E-02   .3134013E-02   .3206899E-02   .3027000E-02   .2611493E-02
   .2057030E-02   .1494742E-02   .1011688E-02   .6139393E-03   .2625728E-03
  -.1309757E-03  -.6523561E-03  -.1282382E-02  -.1958301E-02  -.2621632E-02
  -.3223946E-02  -.3750470E-02  -.4229985E-02  -.4718038E-02  -.5239663E-02
  -.5772244E-02  -.6309326E-02  -.6832804E-02  -.7241223E-02  -.7452073E-02
  -.7425733E-02  -.7145212E-02  -.6661378E-02  -.6121815E-02  -.5720068E-02
  -.5635049E-02  -.5918187E-02  -.6422315E-02  -.6926083E-02  -.7297359E-02
  -.7421493E-02  -.7210123E-02  -.6665924E-02  -.5907374E-02  -.5125332E-02
  -.4523390E-02  -.4175652E-02  -.3978824E-02  -.3802048E-02  -.3568826E-02
  -.3221285E-02  -.2731249E-02  -.2122452E-02  -.1473422E-02  -.8932600E-03
  -.4670440E-03  -.2131251E-03  -.6475568E-04   .1238162E-03   .4780019E-03
   .9913977E-03   .1498752E-02   .1831142E-02   .1914261E-02   .1778305E-02
   .1562134E-02   .1391807E-02   .1374557E-02   .1592107E-02   .2022140E-02
   .2560030E-02   .3104195E-02   .3566547E-02   .3836128E-02   .3832603E-02
   .3561255E-02   .3153343E-02   .2778638E-02   .2502675E-02   .2308461E-02
   .2210184E-02   .2230831E-02   .2325125E-02   .2429913E-02   .2534585E-02
   .2684258E-02   .2861076E-02   .2957204E-02   .2873325E-02   .2639593E-02
   .2384346E-02   .2250641E-02   .2357873E-02   .2737875E-02   .3354855E-02
   .4098281E-02   .4749320E-02   .5085316E-02   .4995351E-02   .4540302E-02
   .3882420E-02   .3236854E-02   .2775144E-02   .2548055E-02   .2461166E-02
   .2292835E-02   .1821289E-02   .9701534E-03  -.1647017E-03  -.1420988E-02
  -.2637354E-02  -.3676804E-02  -.4414415E-02  -.4741957E-02  -.4622747E-02
  -.4187640E-02  -.3675399E-02  -.3286496E-02  -.3098007E-02  -.3052568E-02
  -.3047949E-02  -.3001674E-02  -.2895693E-02  -.2777777E-02  -.2696800E-02
  -.2669695E-02  -.2701364E-02  -.2805673E-02  -.2965130E-02  -.3099614E-02
  -.3153261E-02  -.3109791E-02  -.2971853E-02  -.2753417E-02  -.2454465E-02
  -.2097179E-02  -.1812018E-02  -.1765935E-02  -.2046855E-02  -.2567691E-02
  -.3108368E-02  -.3411433E-02  -.3359455E-02  -.3033751E-02  -.2653399E-02
  -.2441115E-02  -.2476332E-02  -.2703657E-02  -.2997900E-02  -.3246789E-02
  -.3402110E-02  -.3463898E-02  -.3459447E-02  -.3428491E-02  -.3431558E-02
  -.3502672E-02  -.3664609E-02  -.3946985E-02  -.4306034E-02  -.4666031E-02
  -.5035746E-02  -.5460132E-02  -.5917852E-02  -.6335224E-02  -.6635494E-02
  -.6738335E-02  -.6586411E-02  -.6182524E-02  -.5564734E-02  -.4803052E-02
  -.4011163E-02  -.3317712E-02  -.2790237E-02  -.2408675E-02  -.2150685E-02
  -.2049512E-02  -.2142895E-02  -.2428686E-02  -.2837562E-02  -.3275735E-02
  -.3642361E-02  -.3897681E-02  -.4040369E-02  -.4108709E-02  -.4163450E-02
  -.4229235E-02  -.4256389E-02  -.4232813E-02  -.4243245E-02  -.4346221E-02
  -.4579773E-02  -.4930675E-02  -.5317976E-02  -.5637173E-02  -.5815346E-02
  -.5851953E-02  -.5743805E-02  -.5476434E-02  -.5097496E-02  -.4716410E-02
  -.4465020E-02  -.4452433E-02  -.4667799E-02  -.5003945E-02  -.5346664E-02
  -.5626545E-02  -.5821621E-02  -.5912382E-02  -.5884033E-02  -.5723673E-02
  -.5423181E-02  -.5002749E-02  -.4546589E-02  -.4157566E-02  -.3878909E-02
  -.3653363E-02  -.3412875E-02  -.3141955E-02  -.2847373E-02  -.2604974E-02
  -.2550701E-02  -.2753787E-02  -.3179200E-02  -.3711446E-02  -.4225463E-02
  -.4641640E-02  -.4965479E-02  -.5233086E-02  -.5439296E-02  -.5524440E-02
  -.5458902E-02  -.5293175E-02  -.5076691E-02  -.4817865E-02  -.4540792E-02
  -.4318798E-02  -.4244240E-02  -.4378309E-02  -.4685452E-02  -.5021303E-02
  -.5226775E-02  -.5234519E-02  -.5060665E-02  -.4762041E-02  -.4461848E-02
  -.4321333E-02  -.4447799E-02  -.4841456E-02  -.5402338E-02  -.6014526E-02
  -.6558310E-02  -.6935371E-02  -.7133814E-02  -.7184180E-02  -.7091926E-02
  -.6861376E-02  -.6539956E-02  -.6147936E-02  -.5677670E-02  -.5151375E-02
  -.4641686E-02  -.4181487E-02  -.3739914E-02  -.3265513E-02  -.2754248E-02
  -.2265197E-02  -.1870715E-02  -.1606746E-02  -.1463244E-02  -.1416331E-02
  -.1401725E-02  -.1379550E-02  -.1379604E-02  -.1455168E-02  -.1644299E-02
  -.1912592E-02  -.2168012E-02  -.2340032E-02  -.2386953E-02  -.2251623E-02
  -.1950000E-02  -.1588329E-02  -.1268446E-02  -.1078875E-02  -.1079256E-02
  -.1198151E-02  -.1255844E-02  -.1124446E-02  -.7777441E-03  -.2355896E-03
   .3949879E-03   .9444982E-03   .1294109E-02   .1457615E-02   .1497079E-02
   .1425072E-02   .1253767E-02   .1031572E-02   .7913250E-03   .5427748E-03
   .3470441E-03   .2279523E-03   .1327657E-03   .6623777E-04   .8565713E-04
   .1990197E-03   .3690934E-03   .5611476E-03   .6947413E-03   .6203637E-03
   .2751167E-03  -.2724453E-03  -.9561325E-03  -.1747673E-02  -.2596501E-02
  -.3381667E-02  -.3933356E-02  -.4158565E-02  -.4154558E-02  -.4111457E-02
  -.4186145E-02  -.4435036E-02  -.4851866E-02  -.5399457E-02  -.6003059E-02
  -.6564095E-02  -.6996537E-02  -.7251402E-02  -.7358541E-02  -.7392476E-02
  -.7405418E-02  -.7435228E-02  -.7492760E-02  -.7561235E-02  -.7579549E-02
  -.7486339E-02  -.7295777E-02  -.7040270E-02  -.6735461E-02  -.6421192E-02
  -.6202058E-02  -.6161280E-02  -.6288868E-02  -.6480709E-02  -.6614608E-02
  -.6599973E-02  -.6441258E-02  -.6203779E-02  -.5947636E-02  -.5729652E-02
  -.5566659E-02  -.5436572E-02  -.5370213E-02  -.5391503E-02  -.5450689E-02
  -.5523895E-02  -.5671513E-02  -.5941318E-02  -.6290310E-02  -.6653109E-02
  -.6977701E-02  -.7263171E-02  -.7524046E-02  -.7760323E-02  -.7981158E-02
  -.8203851E-02  -.8396475E-02  -.8503038E-02  -.8504896E-02  -.8418231E-02
  -.8295092E-02  -.8227018E-02  -.8341599E-02  -.8672637E-02  -.9171599E-02
  -.9776856E-02  -.1037236E-01  -.1080419E-01  -.1090374E-01  -.1062986E-01
  -.1011861E-01  -.9582698E-02  -.9208535E-02  -.9072658E-02  -.9195143E-02
  -.9499868E-02  -.9848128E-02  -.1018136E-01  -.1049151E-01  -.1070080E-01
  -.1071342E-01  -.1055285E-01  -.1032622E-01  -.1006740E-01  -.9724331E-02
  -.9279599E-02  -.8790644E-02  -.8332284E-02  -.7935140E-02  -.7609157E-02
  -.7378359E-02  -.7266732E-02  -.7261479E-02  -.7317692E-02  -.7403550E-02
  -.7467948E-02  -.7454690E-02  -.7370115E-02  -.7279212E-02  -.7230258E-02
  -.7214808E-02  -.7205494E-02  -.7195533E-02  -.7167980E-02  -.7107417E-02
  -.7026557E-02  -.6907935E-02  -.6701186E-02  -.6372625E-02  -.5977683E-02
  -.5628050E-02  -.5398037E-02  -.5290354E-02  -.5267218E-02  -.5259221E-02
  -.5207212E-02  -.5093095E-02  -.4927140E-02  -.4760817E-02  -.4705362E-02
  -.4856625E-02  -.5187961E-02  -.5618231E-02  -.6062118E-02  -.6474169E-02
  -.6796219E-02  -.6897816E-02  -.6689953E-02  -.6268128E-02  -.5803758E-02
  -.5414270E-02  -.5151883E-02  -.4964267E-02  -.4711658E-02  -.4299721E-02
  -.3705874E-02  -.2978973E-02  -.2235592E-02  -.1605128E-02  -.1169927E-02
  -.9366808E-03  -.8546698E-03  -.8951935E-03  -.1087294E-02  -.1418944E-02
  -.1788042E-02  -.2071390E-02  -.2198581E-02  -.2139153E-02  -.1880765E-02
  -.1447788E-02  -.9756964E-03  -.6893311E-03  -.7280874E-03  -.1050560E-02
  -.1532057E-02  -.2054780E-02  -.2547376E-02  -.2956850E-02  -.3212177E-02
  -.3326770E-02  -.3426901E-02  -.3616435E-02  -.3919699E-02  -.4326004E-02
  -.4813931E-02  -.5350574E-02  -.5912864E-02  -.6487750E-02  -.7046578E-02
  -.7564344E-02  -.8053485E-02  -.8465691E-02  -.8667259E-02  -.8574831E-02
  -.8240713E-02  -.7752623E-02  -.7171669E-02  -.6581090E-02  -.6090042E-02
  -.5810409E-02  -.5788962E-02  -.5937674E-02  -.6112826E-02  -.6203824E-02
  -.6196992E-02  -.6147148E-02  -.6058276E-02  -.5967122E-02  -.5963124E-02
  -.6095187E-02  -.6314389E-02  -.6481921E-02  -.6457889E-02  -.6227824E-02
  -.5958449E-02  -.5836384E-02  -.5906614E-02  -.6109858E-02  -.6338403E-02
  -.6508473E-02  -.6601210E-02  -.6576797E-02  -.6466841E-02  -.6375041E-02
  -.6336077E-02  -.6384252E-02  -.6572886E-02  -.6925501E-02  -.7395095E-02
  -.7820054E-02  -.7973249E-02  -.7720677E-02  -.7131857E-02  -.6414129E-02
  -.5810743E-02  -.5500600E-02  -.5524695E-02  -.5748955E-02  -.5943056E-02
  -.5980137E-02  -.5835234E-02  -.5512352E-02  -.5068928E-02  -.4606720E-02
  -.4202672E-02  -.3906955E-02  -.3767661E-02  -.3796014E-02  -.3890893E-02
  -.3920853E-02  -.3867747E-02  -.3801763E-02  -.3759972E-02  -.3701024E-02
  -.3635847E-02  -.3642038E-02  -.3753487E-02  -.3913834E-02  -.4051396E-02
  -.4131623E-02  -.4107741E-02  -.3955966E-02  -.3666697E-02  -.3270158E-02
  -.2823238E-02  -.2363963E-02  -.1935701E-02  -.1542611E-02  -.1179311E-02
  -.9113960E-03  -.7989904E-03  -.8580898E-03  -.1081513E-02  -.1452376E-02
  -.1927780E-02  -.2444665E-02  -.2942855E-02  -.3402822E-02  -.3779006E-02
  -.4008341E-02  -.4120907E-02  -.4250908E-02  -.4523433E-02  -.4985580E-02
  -.5544071E-02  -.6013079E-02  -.6224637E-02  -.6112119E-02  -.5717268E-02
  -.5133095E-02  -.4472395E-02  -.3897360E-02  -.3584357E-02  -.3629737E-02
  -.3992175E-02  -.4508065E-02  -.4943938E-02  -.5128663E-02  -.5062498E-02
  -.4829892E-02  -.4540980E-02  -.4307882E-02  -.4147222E-02  -.3984974E-02
  -.3754732E-02  -.3463060E-02  -.3108618E-02  -.2706279E-02  -.2337496E-02
  -.2067376E-02  -.1887520E-02  -.1757934E-02  -.1626821E-02  -.1452944E-02
  -.1232160E-02  -.9906317E-03  -.7367032E-03  -.4735343E-03  -.2307363E-03
  -.2225348E-04   .1662667E-03   .3050658E-03   .3585655E-03   .3244210E-03
   .1585633E-03  -.1472086E-03  -.5770707E-03  -.1069840E-02  -.1525962E-02
  -.1847477E-02  -.1991240E-02  -.1996180E-02  -.1942615E-02  -.1939710E-02
  -.2084966E-02  -.2387513E-02  -.2761417E-02  -.3082060E-02  -.3258864E-02
  -.3309034E-02  -.3330193E-02  -.3384636E-02  -.3469230E-02  -.3563327E-02
  -.3694900E-02  -.3861169E-02  -.4006290E-02  -.4089905E-02  -.4118942E-02
  -.4116824E-02  -.4095317E-02  -.4037974E-02  -.3894383E-02  -.3662426E-02
  -.3431503E-02  -.3255655E-02  -.3130487E-02  -.3078201E-02  -.3094746E-02
  -.3142545E-02  -.3208109E-02  -.3288274E-02  -.3347371E-02  -.3353994E-02
  -.3322008E-02  -.3285253E-02  -.3268021E-02  -.3307487E-02  -.3458189E-02
  -.3725327E-02  -.4057185E-02  -.4379789E-02  -.4610459E-02  -.4658671E-02
  -.4484533E-02  -.4128685E-02  -.3723287E-02  -.3443678E-02  -.3364464E-02
  -.3390517E-02  -.3391767E-02  -.3316407E-02  -.3214518E-02  -.3149627E-02
  -.3127058E-02  -.3164493E-02  -.3293458E-02  -.3538200E-02  -.3893133E-02
  -.4302291E-02  -.4661163E-02  -.4836889E-02  -.4737284E-02  -.4377177E-02
  -.3918659E-02  -.3575673E-02  -.3497628E-02  -.3701643E-02  -.4109769E-02
  -.4584754E-02  -.4955290E-02  -.5038083E-02  -.4776213E-02  -.4317885E-02
  -.3924133E-02  -.3774240E-02  -.3897587E-02  -.4202434E-02  -.4528972E-02
  -.4739427E-02  -.4713620E-02  -.4386073E-02  -.3826677E-02  -.3235430E-02
  -.2751557E-02  -.2383894E-02  -.2144864E-02  -.2064712E-02  -.2109679E-02
  -.2177579E-02  -.2147177E-02  -.1954979E-02  -.1560329E-02  -.9724698E-03
  -.2782110E-03   .3417084E-03   .6725569E-03   .6549276E-03   .4478831E-03
   .2631768E-03   .2230262E-03   .3513467E-03   .6183633E-03   .9444480E-03
   .1254508E-02   .1492892E-02   .1609541E-02   .1640450E-02   .1668548E-02
   .1769698E-02   .1950665E-02   .2175575E-02   .2370099E-02   .2475202E-02
   .2493645E-02   .2460027E-02   .2421087E-02   .2413016E-02   .2470210E-02
   .2624622E-02   .2847472E-02   .3030666E-02   .3117578E-02   .3117896E-02
   .3073944E-02   .3075072E-02   .3212343E-02   .3513113E-02   .3902415E-02
   .4292110E-02   .4608974E-02   .4758065E-02   .4669469E-02   .4395660E-02
   .4019847E-02   .3600031E-02   .3164128E-02   .2733908E-02   .2327198E-02
   .1953667E-02   .1590469E-02   .1177646E-02   .6191660E-03  -.1192839E-03
  -.9574847E-03  -.1740025E-02  -.2304766E-02  -.2557779E-02  -.2448298E-02
  -.1994492E-02  -.1300816E-02  -.4614805E-03   .4134610E-03   .1161669E-02
   .1653871E-02   .1858493E-02   .1825041E-02   .1603055E-02   .1183674E-02
   .5670587E-03  -.1447115E-03  -.7722651E-03  -.1162466E-02  -.1278010E-02
  -.1146353E-02  -.8389982E-03  -.4362802E-03  -.1070579E-04   .3426101E-03
   .5742933E-03   .7077893E-03   .7775338E-03   .8167296E-03   .8471759E-03
   .8853692E-03   .9459745E-03   .1034834E-02   .1149115E-02   .1305998E-02
   .1473908E-02   .1625055E-02   .1732546E-02   .1779442E-02   .1827804E-02
   .1977799E-02   .2236653E-02   .2501962E-02   .2656738E-02   .2619982E-02
   .2381109E-02   .2024644E-02   .1660066E-02   .1370920E-02   .1169989E-02
   .9971492E-03   .8000207E-03   .5234807E-03   .1161364E-03  -.3496192E-03
  -.7311750E-03  -.8888165E-03  -.7878876E-03  -.4690778E-03   .2586681E-04
   .6148070E-03   .1177329E-02   .1588715E-02   .1795051E-02   .1859935E-02
   .1874420E-02   .1932861E-02   .2102230E-02   .2388304E-02   .2772994E-02
   .3202885E-02   .3610162E-02   .3906211E-02   .4036767E-02   .4028075E-02
   .3963947E-02   .3915432E-02   .3935274E-02   .4057754E-02   .4282151E-02
   .4561512E-02   .4839555E-02   .5037787E-02   .5030904E-02   .4747402E-02
   .4235262E-02   .3588572E-02   .2871493E-02   .2171868E-02   .1620168E-02
   .1299407E-02   .1187471E-02   .1218021E-02   .1352180E-02   .1535140E-02
   .1698486E-02   .1790238E-02   .1767324E-02   .1646303E-02   .1444400E-02
   .1153518E-02   .7969514E-03   .4452070E-03   .1766215E-03   .1565074E-04
  -.7385482E-04  -.1092979E-03  -.4351810E-04   .1669511E-03   .4953364E-03
   .8778371E-03   .1248825E-02   .1604447E-02   .1935846E-02   .2236144E-02
   .2496684E-02   .2698492E-02   .2828496E-02   .2885753E-02   .2875528E-02
   .2863451E-02   .2924505E-02   .3061593E-02   .3256868E-02   .3500122E-02
   .3750109E-02   .3957653E-02   .4099959E-02   .4158559E-02   .4113225E-02
   .3960788E-02   .3714924E-02   .3407214E-02   .3106310E-02   .2955328E-02
   .3052769E-02   .3355439E-02   .3767611E-02   .4190969E-02   .4544274E-02
   .4765090E-02   .4817955E-02   .4723352E-02   .4554607E-02   .4415313E-02
   .4354222E-02   .4373564E-02   .4476642E-02   .4601072E-02   .4679306E-02
   .4695847E-02   .4613637E-02   .4399583E-02   .4055637E-02   .3627680E-02
   .3208895E-02   .2921989E-02   .2874152E-02   .3095989E-02   .3480068E-02
   .3862191E-02   .4100794E-02   .4129845E-02   .3982619E-02   .3791143E-02
   .3703218E-02   .3825427E-02   .4203534E-02   .4797777E-02   .5483723E-02
   .6022843E-02   .6200610E-02   .6008294E-02   .5580886E-02   .5068127E-02
   .4581085E-02   .4191353E-02   .3935814E-02   .3778233E-02   .3655653E-02
   .3552544E-02   .3487920E-02   .3459602E-02   .3459289E-02   .3487803E-02
   .3580113E-02   .3722838E-02   .3809519E-02   .3759178E-02   .3570832E-02
   .3246590E-02   .2811490E-02   .2322216E-02   .1839140E-02   .1452006E-02
   .1250330E-02   .1255991E-02   .1402723E-02   .1592051E-02   .1689650E-02
   .1596416E-02   .1298164E-02   .8276422E-03   .2095264E-03  -.4383100E-03
  -.9662043E-03  -.1269518E-02  -.1299021E-02  -.1096215E-02  -.8013698E-03
  -.5575264E-03  -.4517214E-03  -.5201952E-03  -.7021839E-03  -.9207929E-03
  -.1157472E-02  -.1408210E-02  -.1648567E-02  -.1829955E-02  -.1900708E-02
  -.1840262E-02  -.1667870E-02  -.1396381E-02  -.9912184E-03  -.4305217E-03
   .2499040E-03   .9548438E-03   .1603950E-02   .2178823E-02   .2681079E-02
   .3079391E-02   .3370659E-02   .3580368E-02   .3717861E-02   .3809440E-02
   .3898735E-02   .4007726E-02   .4132904E-02   .4271577E-02   .4408816E-02
   .4512682E-02   .4576996E-02   .4628047E-02   .4652501E-02   .4626805E-02
   .4588649E-02   .4580792E-02   .4614453E-02   .4689711E-02   .4785900E-02
   .4833038E-02   .4781005E-02   .4685917E-02   .4653621E-02   .4748825E-02
   .4979888E-02   .5324722E-02   .5738248E-02   .6157130E-02   .6502716E-02
   .6725544E-02   .6830230E-02   .6858347E-02   .6832069E-02   .6748496E-02
   .6629852E-02   .6497571E-02   .6353532E-02   .6232619E-02   .6192207E-02
   .6293493E-02   .6534615E-02   .6880750E-02   .7317862E-02   .7806683E-02
   .8263972E-02   .8574748E-02   .8626991E-02   .8387858E-02   .7987816E-02
   .7583176E-02   .7251520E-02   .7049376E-02   .7003266E-02   .7124104E-02
   .7385399E-02   .7717637E-02   .8054151E-02   .8390236E-02   .8764102E-02
   .9202354E-02   .9661222E-02   .1004510E-01   .1032765E-01   .1062402E-01
   .1104661E-01   .1162739E-01   .1233562E-01   .1309371E-01   .1379794E-01
   .1433847E-01   .1465991E-01   .1477896E-01   .1474187E-01   .1464360E-01
   .1457689E-01   .1457462E-01   .1459767E-01   .1459200E-01   .1451131E-01
   .1432639E-01   .1403038E-01   .1363373E-01   .1321631E-01   .1291053E-01
   .1276014E-01   .1266954E-01   .1251869E-01   .1226348E-01   .1193139E-01
   .1157547E-01   .1123309E-01   .1087451E-01   .1048141E-01   .1011737E-01
   .9837062E-02   .9668525E-02   .9647446E-02   .9745745E-02   .9880658E-02
   .9988201E-02   .1000308E-01   .9907762E-02   .9752308E-02   .9606712E-02
   .9526804E-02   .9522218E-02   .9523702E-02   .9479601E-02   .9372815E-02
   .9228215E-02   .9107129E-02   .9091293E-02   .9283517E-02   .9740560E-02
   .1039408E-01   .1105691E-01   .1156798E-01   .1188301E-01   .1200933E-01
   .1193667E-01   .1167682E-01   .1130990E-01   .1095330E-01   .1069974E-01
   .1056673E-01   .1047160E-01   .1033166E-01   .1008979E-01   .9771728E-02
   .9485115E-02   .9298619E-02   .9217386E-02   .9228359E-02   .9314690E-02
   .9474141E-02   .9672376E-02   .9853272E-02   .9997922E-02   .1011900E-01
   .1020381E-01   .1023007E-01   .1023087E-01   .1025073E-01   .1030899E-01
   .1040389E-01   .1049105E-01   .1050459E-01   .1039577E-01   .1016245E-01
   .9791263E-02   .9286095E-02   .8755810E-02   .8331341E-02   .8031322E-02
   .7812878E-02   .7648958E-02   .7525994E-02   .7362874E-02   .7066273E-02
   .6647029E-02   .6224373E-02   .5881020E-02   .5630001E-02   .5535610E-02
   .5646619E-02   .5880881E-02   .6044858E-02   .5962999E-02   .5575836E-02
   .4962838E-02   .4255384E-02   .3531628E-02   .2833377E-02   .2246707E-02
   .1882887E-02   .1752515E-02   .1756945E-02   .1793511E-02   .1778062E-02
   .1642156E-02   .1409509E-02   .1124091E-02   .8110515E-03   .5264694E-03
   .3818344E-03   .4742769E-03   .8061428E-03   .1265380E-02   .1741872E-02
   .2147673E-02   .2403174E-02   .2509198E-02   .2579104E-02   .2749304E-02
   .3102883E-02   .3706532E-02   .4541948E-02   .5524172E-02   .6533964E-02
   .7436439E-02   .8134948E-02   .8583298E-02   .8812164E-02   .8920314E-02
   .8982760E-02   .9014357E-02   .8987084E-02   .8871356E-02   .8647917E-02
   .8302291E-02   .7866132E-02   .7371364E-02   .6796365E-02   .6162617E-02
   .5600694E-02   .5217310E-02   .5044215E-02   .5061826E-02   .5214768E-02
   .5411778E-02   .5541556E-02   .5518812E-02   .5329615E-02   .5045319E-02
   .4767416E-02   .4547028E-02   .4390141E-02   .4312426E-02   .4304943E-02
   .4334416E-02   .4362669E-02   .4342659E-02   .4294927E-02   .4274148E-02
   .4273077E-02   .4277529E-02   .4322852E-02   .4483059E-02   .4812174E-02
   .5270570E-02   .5744856E-02   .6136412E-02   .6387599E-02   .6473835E-02
   .6418783E-02   .6280792E-02   .6112946E-02   .5934768E-02   .5756298E-02
   .5600927E-02   .5520115E-02   .5547717E-02   .5651311E-02   .5769456E-02
   .5857299E-02   .5872604E-02   .5811944E-02   .5746083E-02   .5735080E-02
   .5749786E-02   .5699308E-02   .5517608E-02   .5211902E-02   .4834235E-02
   .4434165E-02   .4052139E-02   .3763713E-02   .3656899E-02   .3756960E-02
   .3992305E-02   .4239156E-02   .4385565E-02   .4430241E-02   .4445838E-02
   .4490409E-02   .4642263E-02   .5000310E-02   .5585841E-02   .6334211E-02
   .7123899E-02   .7771785E-02   .8107052E-02   .8121373E-02   .7925579E-02
   .7601500E-02   .7240280E-02   .6951905E-02   .6772089E-02   .6639358E-02
   .6456051E-02   .6165832E-02   .5751412E-02   .5180144E-02   .4483505E-02
   .3772428E-02   .3098867E-02   .2470401E-02   .1901336E-02   .1405707E-02
   .1022965E-02   .7527657E-03   .5665439E-03   .4108436E-03   .2638145E-03
   .1363890E-03   .3388864E-04  -.5892789E-04  -.1481396E-03  -.2017438E-03
  -.1948865E-03  -.1905900E-03  -.2210883E-03  -.2524686E-03  -.2588456E-03
  -.2436177E-03  -.2726034E-03  -.4334699E-03  -.7352158E-03  -.1089556E-02
  -.1342544E-02  -.1421820E-02  -.1363058E-02  -.1252511E-02  -.1218724E-02
  -.1340384E-02  -.1557931E-02  -.1756343E-02  -.1836224E-02  -.1745338E-02
  -.1480517E-02  -.1067648E-02  -.5584432E-03  -.4076773E-04   .3630749E-03
   .5831321E-03   .6294543E-03   .4953785E-03   .2154745E-03  -.1280115E-03
  -.4932736E-03  -.8591773E-03  -.1203705E-02  -.1476341E-02  -.1664047E-02
  -.1812438E-02  -.1977417E-02  -.2241466E-02  -.2602957E-02  -.2990055E-02
  -.3418575E-02  -.3933941E-02  -.4525431E-02  -.5133439E-02  -.5667168E-02
  -.6053066E-02  -.6261552E-02  -.6280356E-02  -.6097914E-02  -.5780045E-02
  -.5445030E-02  -.5188902E-02  -.5015495E-02  -.4866990E-02  -.4734147E-02
  -.4653832E-02  -.4646806E-02  -.4718005E-02  -.4820426E-02  -.4863975E-02
  -.4811175E-02  -.4683461E-02  -.4493759E-02  -.4231808E-02  -.3904574E-02
  -.3574078E-02  -.3322608E-02  -.3198666E-02  -.3165786E-02  -.3142680E-02
  -.3076526E-02  -.2934822E-02  -.2732796E-02  -.2502455E-02  -.2201228E-02
  -.1796549E-02  -.1336071E-02  -.8959075E-03  -.5435907E-03  -.2946759E-03
  -.1352236E-03  -.7305866E-04  -.1447604E-03  -.3770026E-03  -.7698724E-03
  -.1285397E-02  -.1859137E-02  -.2435837E-02  -.2930606E-02  -.3237984E-02
  -.3320582E-02  -.3208981E-02  -.2941015E-02  -.2556858E-02  -.2125190E-02
  -.1764868E-02  -.1601055E-02  -.1651754E-02  -.1858798E-02  -.2121380E-02
  -.2300484E-02  -.2311275E-02  -.2156766E-02  -.1912037E-02  -.1698835E-02
  -.1622073E-02  -.1711484E-02  -.1947243E-02  -.2257796E-02  -.2556515E-02
  -.2754864E-02  -.2799868E-02  -.2729047E-02  -.2639878E-02  -.2628324E-02
  -.2718366E-02  -.2899935E-02  -.3139427E-02  -.3409430E-02  -.3638387E-02
  -.3720217E-02  -.3659011E-02  -.3550423E-02  -.3520401E-02  -.3649365E-02
  -.3929580E-02  -.4306605E-02  -.4654215E-02  -.4839567E-02  -.4810396E-02
  -.4599829E-02  -.4324424E-02  -.4115935E-02  -.4051831E-02  -.4135099E-02
  -.4339291E-02  -.4631158E-02  -.4981584E-02  -.5334778E-02  -.5602381E-02
  -.5722887E-02  -.5734306E-02  -.5735649E-02  -.5792957E-02  -.5911463E-02
  -.6067253E-02  -.6189630E-02  -.6221832E-02  -.6184015E-02  -.6111169E-02
  -.6001068E-02  -.5873761E-02  -.5788370E-02  -.5789174E-02  -.5890503E-02
  -.6085396E-02  -.6357909E-02  -.6653390E-02  -.6910640E-02  -.7104313E-02
  -.7227394E-02  -.7271876E-02  -.7297825E-02  -.7368497E-02  -.7473813E-02
  -.7618441E-02  -.7834856E-02  -.8069974E-02  -.8225867E-02  -.8243536E-02
  -.8134875E-02  -.7960282E-02  -.7745266E-02  -.7496713E-02  -.7308801E-02
  -.7277496E-02  -.7405654E-02  -.7576544E-02  -.7604033E-02  -.7393382E-02
  -.7008097E-02  -.6569749E-02  -.6130123E-02  -.5716970E-02  -.5399234E-02
  -.5214018E-02  -.5158395E-02  -.5141511E-02  -.5014671E-02  -.4682740E-02
  -.4181913E-02  -.3649377E-02  -.3260771E-02  -.3160264E-02  -.3375516E-02
  -.3769043E-02  -.4150224E-02  -.4355279E-02  -.4313496E-02  -.4097457E-02
  -.3834256E-02  -.3621677E-02  -.3480018E-02  -.3370767E-02  -.3243178E-02
  -.3050108E-02  -.2804787E-02  -.2544955E-02  -.2257389E-02  -.1917134E-02
  -.1545881E-02  -.1201296E-02  -.9095652E-03  -.7232319E-03  -.6905891E-03
  -.7593895E-03  -.7981402E-03  -.7432187E-03  -.6502644E-03  -.6088421E-03
  -.6525947E-03  -.8011710E-03  -.1054857E-02  -.1393107E-02  -.1757748E-02
  -.2070491E-02  -.2293896E-02  -.2429783E-02  -.2464533E-02  -.2389115E-02
  -.2300072E-02  -.2337255E-02  -.2563328E-02  -.2952488E-02  -.3423512E-02
  -.3910874E-02  -.4350615E-02  -.4653510E-02  -.4749084E-02  -.4657980E-02
  -.4484409E-02  -.4330079E-02  -.4287387E-02  -.4449922E-02  -.4812943E-02
  -.5293952E-02  -.5790408E-02  -.6170181E-02  -.6304997E-02  -.6137675E-02
  -.5704061E-02  -.5124903E-02  -.4537614E-02  -.4017835E-02  -.3655490E-02
  -.3538044E-02  -.3666153E-02  -.3949664E-02  -.4267674E-02  -.4530783E-02
  -.4720851E-02  -.4827763E-02  -.4846995E-02  -.4823384E-02  -.4823513E-02
  -.4853714E-02  -.4905453E-02  -.4939679E-02  -.4910632E-02  -.4812640E-02
  -.4638528E-02  -.4464988E-02  -.4459101E-02  -.4682599E-02  -.5073182E-02
  -.5517789E-02  -.5900549E-02  -.6140643E-02  -.6183090E-02  -.6029768E-02
  -.5726905E-02  -.5340806E-02  -.4954659E-02  -.4678014E-02  -.4568112E-02
  -.4626559E-02  -.4827926E-02  -.5102114E-02  -.5380965E-02  -.5583819E-02
  -.5556193E-02  -.5233961E-02  -.4743588E-02  -.4224064E-02  -.3752758E-02
  -.3407158E-02  -.3253972E-02  -.3285320E-02  -.3388587E-02  -.3421788E-02
  -.3351595E-02  -.3234119E-02  -.3201764E-02  -.3394075E-02  -.3863029E-02
  -.4534153E-02  -.5277150E-02  -.5953437E-02  -.6468547E-02  -.6816169E-02
  -.7058143E-02  -.7275460E-02  -.7495399E-02  -.7736445E-02  -.8058225E-02
  -.8474630E-02  -.8887241E-02  -.9181256E-02  -.9310130E-02  -.9300410E-02
  -.9194737E-02  -.9023431E-02  -.8825548E-02  -.8628723E-02  -.8450593E-02
  -.8314554E-02  -.8240196E-02  -.8241072E-02  -.8347024E-02  -.8594330E-02
  -.8985909E-02  -.9427181E-02  -.9792989E-02  -.1002777E-01  -.1010830E-01
  -.1002313E-01  -.9822327E-02  -.9566951E-02  -.9276618E-02  -.8976056E-02
  -.8725906E-02  -.8558869E-02  -.8402312E-02  -.8152222E-02  -.7754248E-02
  -.7207189E-02  -.6618519E-02  -.6153734E-02  -.5933685E-02  -.5980611E-02
  -.6229528E-02  -.6558884E-02  -.6835115E-02  -.6940934E-02  -.6819818E-02
  -.6472397E-02  -.5980931E-02  -.5534929E-02  -.5332998E-02  -.5444314E-02
  -.5743360E-02  -.5988694E-02  -.5993434E-02  -.5682424E-02  -.5092407E-02
  -.4383226E-02  -.3715270E-02  -.3224396E-02  -.3000321E-02  -.3058715E-02
  -.3349049E-02  -.3783771E-02  -.4219625E-02  -.4506322E-02  -.4556835E-02
  -.4403598E-02  -.4185714E-02  -.4020528E-02  -.3908743E-02  -.3829761E-02
  -.3796929E-02  -.3777992E-02  -.3690986E-02  -.3483465E-02  -.3162485E-02
  -.2776168E-02  -.2401001E-02  -.2158142E-02  -.2126964E-02  -.2303588E-02
  -.2625294E-02  -.2984834E-02  -.3231452E-02  -.3257318E-02  -.3072283E-02
  -.2727404E-02  -.2337812E-02  -.2081415E-02  -.2062814E-02  -.2288660E-02
  -.2679371E-02  -.3152927E-02  -.3665846E-02  -.4179265E-02  -.4655190E-02
  -.5060714E-02  -.5419375E-02  -.5747145E-02  -.6041302E-02  -.6251965E-02
  -.6294145E-02  -.6157981E-02  -.5883951E-02  -.5481876E-02  -.4937315E-02
  -.4265357E-02  -.3549753E-02  -.2901949E-02  -.2441805E-02  -.2215131E-02
  -.2211232E-02  -.2387589E-02  -.2653223E-02  -.2869506E-02  -.2923758E-02
  -.2751835E-02  -.2371142E-02  -.1862280E-02  -.1290791E-02  -.7438904E-03
  -.2778790E-03   .7758622E-04   .2982573E-03   .4008619E-03   .4405987E-03
   .4739959E-03   .5777349E-03   .8004784E-03   .1091375E-02   .1346206E-02
   .1487141E-02   .1490873E-02   .1370834E-02   .1155879E-02   .8958422E-03
   .6998131E-03   .6458920E-03   .7206570E-03   .8613083E-03   .1008077E-02
   .1088589E-02   .1069543E-02   .1010006E-02   .9985552E-03   .1081152E-02
   .1261851E-02   .1527090E-02   .1851969E-02   .2189251E-02   .2468584E-02
   .2585908E-02   .2463992E-02   .2137997E-02   .1689388E-02   .1235368E-02
   .9161865E-03   .7960848E-03   .8601076E-03   .1038915E-02   .1247975E-02
   .1425463E-02   .1508079E-02   .1471271E-02   .1318582E-02   .1021085E-02
   .5972775E-03   .1469292E-03  -.2445647E-03  -.5312230E-03  -.6450699E-03
  -.5290811E-03  -.2389877E-03   .1121930E-03   .4286701E-03   .6584008E-03
   .7837294E-03   .7938734E-03   .7007182E-03   .5676078E-03   .4121420E-03
   .2310090E-03   .4104955E-04  -.9394048E-04  -.1060304E-03   .5282861E-05
   .1606345E-03   .2792222E-03   .3259567E-03   .3461384E-03   .3922399E-03
   .4582525E-03   .5488205E-03   .6859818E-03   .9100198E-03   .1220043E-02
   .1539871E-02   .1747819E-02   .1804132E-02   .1761985E-02   .1690719E-02
   .1653124E-02   .1718251E-02   .1955833E-02   .2389854E-02   .2918215E-02
   .3371221E-02   .3620084E-02   .3651004E-02   .3534318E-02   .3388339E-02
   .3316700E-02   .3320358E-02   .3350654E-02   .3332813E-02   .3248242E-02
   .3121507E-02   .2993744E-02   .2898838E-02   .2836135E-02   .2806058E-02
   .2826829E-02   .2879610E-02   .2926572E-02   .2942397E-02   .2912439E-02
   .2848237E-02   .2789730E-02   .2760769E-02   .2743534E-02   .2748524E-02
   .2840500E-02   .3048466E-02   .3330717E-02   .3612058E-02   .3834934E-02
   .4020004E-02   .4268270E-02   .4597679E-02   .4937623E-02   .5213341E-02
   .5411411E-02   .5552390E-02   .5630365E-02   .5606137E-02   .5450445E-02
   .5163630E-02   .4773278E-02   .4311816E-02   .3859811E-02   .3513488E-02
   .3299917E-02   .3162716E-02   .3047121E-02   .2926595E-02   .2792092E-02
   .2692104E-02   .2653813E-02   .2677008E-02   .2788590E-02   .2990987E-02
   .3224188E-02   .3404514E-02   .3446222E-02   .3383646E-02   .3323103E-02
   .3324082E-02   .3420053E-02   .3604030E-02   .3852841E-02   .4147242E-02
   .4411340E-02   .4529678E-02   .4469990E-02   .4258884E-02   .3895286E-02
   .3444281E-02   .3041712E-02   .2777601E-02   .2727698E-02   .2941237E-02
   .3321824E-02   .3652175E-02   .3786114E-02   .3734589E-02   .3611431E-02
   .3501692E-02   .3486055E-02   .3619334E-02   .3872994E-02   .4192589E-02
   .4491366E-02   .4705436E-02   .4856552E-02   .5009225E-02   .5171736E-02
   .5308555E-02   .5408676E-02   .5494154E-02   .5576126E-02   .5606996E-02
   .5536114E-02   .5389515E-02   .5264820E-02   .5228151E-02   .5233075E-02
   .5195737E-02   .5088489E-02   .4955358E-02   .4854096E-02   .4836360E-02
   .4957987E-02   .5226644E-02   .5595172E-02   .5932721E-02   .6110486E-02
   .6099137E-02   .5905213E-02   .5608631E-02   .5378750E-02   .5336234E-02
   .5487726E-02   .5735627E-02   .5976451E-02   .6106043E-02   .6028116E-02
   .5752395E-02   .5411201E-02   .5193364E-02   .5266536E-02   .5645653E-02
   .6231506E-02   .6880223E-02   .7436061E-02   .7759235E-02   .7764849E-02
   .7435944E-02   .6859191E-02   .6185272E-02   .5574616E-02   .5147147E-02
   .4963505E-02   .4997781E-02   .5200123E-02   .5511435E-02   .5829983E-02
   .6082462E-02   .6254393E-02   .6353335E-02   .6385501E-02   .6345796E-02
   .6248350E-02   .6114937E-02   .6024448E-02   .6021580E-02   .6105808E-02
   .6252381E-02   .6438036E-02   .6609333E-02   .6666173E-02   .6548044E-02
   .6277385E-02   .5944462E-02   .5630489E-02   .5404825E-02   .5285776E-02
   .5220897E-02   .5124395E-02   .4914302E-02   .4549032E-02   .4052226E-02
   .3520347E-02   .3071750E-02   .2806382E-02   .2763178E-02   .2932574E-02
   .3283961E-02   .3729284E-02   .4150270E-02   .4452417E-02   .4583475E-02
   .4576346E-02   .4534576E-02   .4516338E-02   .4494940E-02   .4440647E-02
   .4387914E-02   .4368673E-02   .4363504E-02   .4344461E-02   .4351993E-02
   .4418599E-02   .4546433E-02   .4735076E-02   .4939730E-02   .5122515E-02
   .5257345E-02   .5301416E-02   .5251223E-02   .5117110E-02   .4906375E-02
   .4662284E-02   .4456987E-02   .4351885E-02   .4379811E-02   .4552725E-02
   .4849374E-02   .5193406E-02   .5452996E-02   .5509209E-02   .5328386E-02
   .4973488E-02   .4516605E-02   .4048593E-02   .3690196E-02   .3518186E-02
   .3539994E-02   .3688547E-02   .3882465E-02   .4010704E-02   .3999998E-02
   .3818819E-02   .3475616E-02   .3060361E-02   .2673793E-02   .2415026E-02
   .2379280E-02   .2534513E-02   .2758891E-02   .2937633E-02   .2999006E-02
   .2896207E-02   .2598321E-02   .2176660E-02   .1743129E-02   .1413403E-02
   .1335195E-02   .1514351E-02   .1794958E-02   .2002167E-02   .2008412E-02
   .1748100E-02   .1279816E-02   .7468675E-03   .3188898E-03   .9430591E-04
   .9193315E-04   .2134555E-03   .3305171E-03   .3886133E-03   .4223125E-03
   .4758343E-03   .5482206E-03   .6345439E-03   .7185418E-03   .7157710E-03
   .5609465E-03   .3035121E-03   .1852291E-04  -.2432326E-03  -.4292588E-03
  -.5159049E-03  -.5185700E-03  -.4862732E-03  -.4686830E-03  -.4681192E-03
  -.4523552E-03  -.4398177E-03  -.4524791E-03  -.5042628E-03  -.6169413E-03
  -.8014794E-03  -.9717946E-03  -.1004279E-02  -.8840727E-03  -.6617520E-03
  -.3594577E-03  -.1518528E-04   .2886993E-03   .4632551E-03   .4470338E-03
   .2267435E-03  -.1177477E-03  -.4647308E-03  -.7597034E-03  -.9475904E-03
  -.9886790E-03  -.9457605E-03  -.9564037E-03  -.1109987E-02  -.1324287E-02
  -.1436664E-02  -.1357579E-02  -.1158328E-02  -.9534158E-03  -.7281238E-03
  -.4547439E-03  -.2094966E-03  -.1345045E-03  -.2507872E-03  -.4331561E-03
  -.5714810E-03  -.5954987E-03  -.5249737E-03  -.4259659E-03  -.3524612E-03
  -.3680609E-03  -.5123341E-03  -.7446104E-03  -.9901769E-03  -.1174352E-02
  -.1221671E-02  -.1121610E-02  -.9232147E-03  -.7146371E-03  -.6025842E-03
  -.6270407E-03  -.7836952E-03  -.1021749E-02  -.1261274E-02  -.1410295E-02
  -.1426760E-02  -.1361432E-02  -.1250472E-02  -.1082830E-02  -.8735120E-03
  -.6581734E-03  -.4399129E-03  -.2279319E-03  -.1406067E-04   .1953384E-03
   .3431891E-03   .3633103E-03   .2331997E-03   .1960026E-04  -.2114006E-03
  -.4630321E-03  -.7504370E-03  -.1040387E-02  -.1258297E-02  -.1357639E-02
  -.1364773E-02  -.1300725E-02  -.1179450E-02  -.1048539E-02  -.9883774E-03
  -.1049891E-02  -.1209303E-02  -.1383751E-02  -.1479096E-02  -.1433662E-02
  -.1224167E-02  -.9320636E-03  -.7348034E-03  -.7717456E-03  -.1069376E-02
  -.1564156E-02  -.2152727E-02  -.2725832E-02  -.3186430E-02  -.3415478E-02
  -.3352799E-02  -.3064317E-02  -.2718929E-02  -.2497757E-02  -.2493867E-02
  -.2694946E-02  -.3017586E-02  -.3383687E-02  -.3724667E-02  -.4003000E-02
  -.4177533E-02  -.4227812E-02  -.4229011E-02  -.4210895E-02  -.4128182E-02
  -.3986697E-02  -.3828094E-02  -.3699429E-02  -.3643153E-02  -.3669191E-02
  -.3728896E-02  -.3813001E-02  -.3918853E-02  -.3999295E-02  -.4001202E-02
  -.3946952E-02  -.3882199E-02  -.3849424E-02  -.3880529E-02  -.3984112E-02
  -.4124691E-02  -.4246411E-02  -.4346940E-02  -.4443278E-02  -.4559418E-02
  -.4710642E-02  -.4894023E-02  -.5103987E-02  -.5289011E-02  -.5398517E-02
  -.5415685E-02  -.5366724E-02  -.5273335E-02  -.5149718E-02  -.5100098E-02
  -.5246441E-02  -.5618816E-02  -.6158709E-02  -.6754499E-02  -.7271790E-02
  -.7637728E-02  -.7824232E-02  -.7842902E-02  -.7783279E-02  -.7719114E-02
  -.7663563E-02  -.7635792E-02  -.7667892E-02  -.7770161E-02  -.7934819E-02
  -.8081818E-02  -.8155481E-02  -.8216913E-02  -.8312449E-02  -.8445386E-02
  -.8641777E-02  -.8933673E-02  -.9261213E-02  -.9459377E-02  -.9405237E-02
  -.9117704E-02  -.8686535E-02  -.8187218E-02  -.7719093E-02  -.7400194E-02
  -.7328228E-02  -.7514499E-02  -.7861204E-02  -.8188393E-02  -.8342229E-02
  -.8270849E-02  -.8028132E-02  -.7726337E-02  -.7460036E-02  -.7291784E-02
  -.7314856E-02  -.7580757E-02  -.8004599E-02  -.8424755E-02  -.8712164E-02
  -.8830578E-02  -.8774569E-02  -.8563318E-02  -.8274886E-02  -.8010403E-02
  -.7795996E-02  -.7612852E-02  -.7442488E-02  -.7249957E-02  -.7036691E-02
  -.6867181E-02  -.6764834E-02  -.6711820E-02  -.6698245E-02  -.6705852E-02
  -.6729134E-02  -.6803633E-02  -.6958680E-02  -.7159696E-02  -.7351051E-02
  -.7535942E-02  -.7762581E-02  -.8003527E-02  -.8165543E-02  -.8200953E-02
  -.8120105E-02  -.8000042E-02  -.7899958E-02  -.7899750E-02  -.8066121E-02
  -.8352589E-02  -.8650380E-02  -.8881706E-02  -.8971631E-02  -.8907256E-02
  -.8716527E-02  -.8406006E-02  -.7998970E-02  -.7572691E-02  -.7208247E-02
  -.6959140E-02  -.6846842E-02  -.6852729E-02  -.6941005E-02  -.7043181E-02
  -.7073658E-02  -.6963279E-02  -.6727186E-02  -.6421233E-02  -.6076535E-02
  -.5718684E-02  -.5383346E-02  -.5130520E-02  -.5004449E-02  -.4963275E-02
  -.4931683E-02  -.4898484E-02  -.4884085E-02  -.4913857E-02  -.5032795E-02
  -.5216833E-02  -.5402866E-02  -.5588259E-02  -.5829003E-02  -.6147057E-02
  -.6481336E-02  -.6743338E-02  -.6907764E-02  -.7007769E-02  -.7060578E-02
  -.7039976E-02  -.6961256E-02  -.6894231E-02  -.6894816E-02  -.6945961E-02
  -.7024806E-02  -.7120302E-02  -.7195148E-02  -.7186847E-02  -.7044220E-02
  -.6805005E-02  -.6570462E-02  -.6409098E-02  -.6350149E-02  -.6399494E-02
  -.6547134E-02  -.6760438E-02  -.6988499E-02  -.7190652E-02  -.7364707E-02
  -.7503382E-02  -.7557911E-02  -.7471272E-02  -.7239112E-02  -.6926595E-02
  -.6643878E-02  -.6465130E-02  -.6404788E-02  -.6445218E-02  -.6564392E-02
  -.6657688E-02  -.6646084E-02  -.6560744E-02  -.6436661E-02  -.6303478E-02
  -.6189501E-02  -.6100035E-02  -.6019798E-02  -.5938833E-02  -.5871613E-02
  -.5824518E-02  -.5765869E-02  -.5687069E-02  -.5619308E-02  -.5614976E-02
  -.5657962E-02  -.5724790E-02  -.5815891E-02  -.5917203E-02  -.5990657E-02
  -.5989910E-02  -.5908632E-02  -.5782702E-02  -.5665746E-02  -.5537038E-02
  -.5312555E-02  -.4987031E-02  -.4614185E-02  -.4245276E-02  -.3955497E-02
  -.3804911E-02  -.3815912E-02  -.3983039E-02  -.4234428E-02  -.4451909E-02
  -.4579135E-02  -.4641580E-02  -.4646681E-02  -.4572539E-02  -.4425555E-02
  -.4243418E-02  -.4079742E-02  -.3965703E-02  -.3936101E-02  -.4006477E-02
  -.4156385E-02  -.4376352E-02  -.4657447E-02  -.4926057E-02  -.5083293E-02
  -.5094348E-02  -.4967807E-02  -.4723682E-02  -.4425216E-02  -.4184060E-02
  -.4109251E-02  -.4207447E-02  -.4365593E-02  -.4498656E-02  -.4593250E-02
  -.4644478E-02  -.4666298E-02  -.4712146E-02  -.4827631E-02  -.4986784E-02
  -.5182788E-02  -.5425640E-02  -.5708377E-02  -.5987657E-02  -.6200833E-02
  -.6304587E-02  -.6286246E-02  -.6161598E-02  -.5968369E-02  -.5812808E-02
  -.5784192E-02  -.5891587E-02  -.6103981E-02  -.6379177E-02  -.6680835E-02
  -.6959317E-02  -.7169977E-02  -.7310866E-02  -.7392140E-02  -.7432001E-02
  -.7459642E-02  -.7459110E-02  -.7395272E-02  -.7271922E-02  -.7156347E-02
  -.7139575E-02  -.7254019E-02  -.7433083E-02  -.7609668E-02  -.7766247E-02
  -.7913897E-02  -.8061095E-02  -.8141385E-02  -.8109803E-02  -.8042826E-02
  -.8020727E-02  -.8050088E-02  -.8066022E-02  -.8033427E-02  -.8006895E-02
  -.8024074E-02  -.8051851E-02  -.8049711E-02  -.7975388E-02  -.7793264E-02
  -.7539972E-02  -.7301623E-02  -.7130354E-02  -.7037528E-02  -.7017483E-02
  -.7032501E-02  -.6994569E-02  -.6819456E-02  -.6482297E-02  -.5990963E-02
  -.5374324E-02  -.4717635E-02  -.4131727E-02  -.3715518E-02  -.3514375E-02
  -.3446978E-02  -.3386879E-02  -.3243808E-02  -.2983519E-02  -.2666154E-02
  -.2371208E-02  -.2167936E-02  -.2124158E-02  -.2302287E-02  -.2679878E-02
  -.3126913E-02  -.3499929E-02  -.3748945E-02  -.3865367E-02  -.3843493E-02
  -.3704232E-02  -.3519483E-02  -.3383459E-02  -.3327165E-02  -.3332506E-02
  -.3325177E-02  -.3250965E-02  -.3107616E-02  -.2885456E-02  -.2584301E-02
  -.2247988E-02  -.1961819E-02  -.1802264E-02  -.1754109E-02  -.1724664E-02
  -.1578739E-02  -.1267490E-02  -.8437257E-03  -.3671731E-03   .1081545E-03
   .4598251E-03   .5696437E-03   .4788082E-03   .3330839E-03   .2593696E-03
   .3086927E-03   .4500008E-03   .6263530E-03   .7989941E-03   .9889184E-03
   .1260364E-02   .1626923E-02   .1981337E-02   .2210555E-02   .2315903E-02
   .2338501E-02   .2254254E-02   .2024549E-02   .1664269E-02   .1254574E-02
   .8919885E-03   .6435512E-03   .5297416E-03   .5076639E-03   .5796769E-03
   .7670153E-03   .1012321E-02   .1214823E-02   .1305379E-02   .1279585E-02
   .1165022E-02   .1028938E-02   .9740074E-03   .1027010E-02   .1157872E-02
   .1323632E-02   .1457187E-02   .1534035E-02   .1563397E-02   .1599886E-02
   .1706158E-02   .1865433E-02   .2011439E-02   .2125944E-02   .2201411E-02
   .2193794E-02   .2035288E-02   .1758041E-02   .1492170E-02   .1304955E-02
   .1218301E-02   .1280010E-02   .1543570E-02   .1984758E-02   .2493292E-02
   .2966356E-02   .3324635E-02   .3558654E-02   .3709230E-02   .3795094E-02
   .3793297E-02   .3716838E-02   .3639419E-02   .3611420E-02   .3632869E-02
   .3702617E-02   .3791090E-02   .3872272E-02   .3946500E-02   .4029998E-02
   .4136189E-02   .4250356E-02   .4324523E-02   .4303572E-02   .4145238E-02
   .3867300E-02   .3510826E-02   .3136643E-02   .2866095E-02   .2771924E-02
   .2803441E-02   .2862674E-02   .2882052E-02   .2876531E-02   .2901741E-02
   .2985813E-02   .3111596E-02   .3248995E-02   .3373588E-02   .3404494E-02
   .3270473E-02   .2980849E-02   .2657779E-02   .2399022E-02   .2246046E-02
   .2244432E-02   .2416108E-02   .2707508E-02   .3027614E-02   .3274708E-02
   .3413329E-02   .3451906E-02   .3407590E-02   .3303934E-02   .3157188E-02
   .3001666E-02   .2882378E-02   .2805057E-02   .2713177E-02   .2550675E-02
   .2286011E-02   .1934457E-02   .1552484E-02   .1213761E-02   .9970606E-03
   .9212077E-03   .9499390E-03   .1044333E-02   .1165248E-02   .1248596E-02
   .1240396E-02   .1161689E-02   .1034899E-02   .8858446E-03   .7722714E-03
   .7488608E-03   .8076793E-03   .8822829E-03   .9353388E-03   .9808717E-03
   .1046547E-02   .1166498E-02   .1366315E-02   .1633932E-02   .1908828E-02
   .2136706E-02   .2274756E-02   .2318481E-02   .2286502E-02   .2231482E-02
   .2221841E-02   .2282676E-02   .2406544E-02   .2556349E-02   .2656034E-02
   .2599827E-02   .2381664E-02   .2087378E-02   .1814744E-02   .1666779E-02
   .1718178E-02   .1974506E-02   .2349224E-02   .2707818E-02   .2981257E-02
   .3188412E-02   .3339219E-02   .3428658E-02   .3483020E-02   .3586572E-02
   .3842396E-02   .4226504E-02   .4621522E-02   .4935265E-02   .5138093E-02
   .5231217E-02   .5263941E-02   .5313955E-02   .5385319E-02   .5475509E-02
   .5560195E-02   .5578486E-02   .5440955E-02   .5097501E-02   .4638960E-02
   .4223238E-02   .3951946E-02   .3842856E-02   .3846593E-02   .3920901E-02
   .4066184E-02   .4271627E-02   .4511315E-02   .4717224E-02   .4795736E-02
   .4714252E-02   .4512634E-02   .4276795E-02   .4080488E-02   .3937949E-02
   .3871277E-02   .3913308E-02   .4059641E-02   .4271092E-02   .4493856E-02
   .4703714E-02   .4897753E-02   .5077513E-02   .5244364E-02   .5393768E-02
   .5524901E-02   .5617834E-02   .5680875E-02   .5757869E-02   .5890226E-02
   .6096739E-02   .6337249E-02   .6555266E-02   .6697456E-02   .6738724E-02
   .6708451E-02   .6634868E-02   .6510282E-02   .6389613E-02   .6344219E-02
   .6407395E-02   .6599822E-02   .6887678E-02   .7220144E-02   .7532608E-02
   .7762761E-02   .7900487E-02   .7974605E-02   .7998872E-02   .8000757E-02
   .7997292E-02   .8013114E-02   .8087581E-02   .8254882E-02   .8488202E-02
   .8695180E-02   .8809600E-02   .8824141E-02   .8797518E-02   .8763912E-02
   .8743862E-02   .8740447E-02   .8775285E-02   .8865299E-02   .8960151E-02
   .8936551E-02   .8740278E-02   .8431174E-02   .8108730E-02   .7857731E-02
   .7751358E-02   .7832249E-02   .8049283E-02   .8286566E-02   .8459712E-02
   .8520252E-02   .8448178E-02   .8301651E-02   .8131699E-02   .7962634E-02
   .7790512E-02   .7653150E-02   .7614480E-02   .7630018E-02   .7585616E-02
   .7430990E-02   .7227264E-02   .7074192E-02   .7036337E-02   .7125808E-02
   .7316944E-02   .7560414E-02   .7779124E-02   .7918531E-02   .7940973E-02
   .7870197E-02   .7772053E-02   .7686613E-02   .7633611E-02   .7621441E-02
   .7629723E-02   .7617735E-02   .7557103E-02   .7489028E-02   .7486556E-02
   .7590457E-02   .7750845E-02   .7881363E-02   .7990777E-02   .8126989E-02
   .8305935E-02   .8524091E-02   .8700312E-02   .8771688E-02   .8789800E-02
   .8847641E-02   .8996051E-02   .9178434E-02   .9325208E-02   .9397985E-02
   .9437421E-02   .9470040E-02   .9492938E-02   .9481772E-02   .9418039E-02
   .9331678E-02   .9249729E-02   .9162519E-02   .9031617E-02   .8863108E-02
   .8719276E-02   .8616803E-02   .8527112E-02   .8428238E-02   .8311244E-02
   .8178306E-02   .8017854E-02   .7860443E-02   .7735037E-02   .7642549E-02
   .7602010E-02   .7643684E-02   .7780236E-02   .7970765E-02   .8148337E-02
   .8247774E-02   .8219773E-02   .8068833E-02   .7814457E-02   .7479022E-02
   .7119171E-02   .6782607E-02   .6534879E-02   .6431235E-02   .6462110E-02
   .6547461E-02   .6583808E-02   .6498812E-02   .6294284E-02   .6010782E-02
   .5690686E-02   .5386710E-02   .5156708E-02   .5027882E-02   .4984591E-02
   .5005165E-02   .5088490E-02   .5214543E-02   .5344962E-02   .5480959E-02
   .5665858E-02   .5905686E-02   .6153970E-02   .6351897E-02   .6438514E-02
   .6385364E-02   .6225262E-02   .6013818E-02   .5824067E-02   .5714468E-02
   .5705703E-02   .5748406E-02   .5766112E-02   .5700888E-02   .5478857E-02
   .5111408E-02   .4733093E-02   .4438717E-02   .4274616E-02   .4313351E-02
   .4548867E-02   .4838680E-02   .5032798E-02   .5076126E-02   .4996021E-02
   .4866056E-02   .4739142E-02   .4644526E-02   .4627445E-02   .4699153E-02
   .4804900E-02   .4889339E-02   .4889733E-02   .4725272E-02   .4427028E-02
   .4134175E-02   .3915008E-02   .3765215E-02   .3721788E-02   .3817703E-02
   .3963520E-02   .4040802E-02   .3989694E-02   .3806599E-02   .3548499E-02
   .3314683E-02   .3179822E-02   .3162581E-02   .3237231E-02   .3358437E-02
   .3490241E-02   .3577064E-02   .3575640E-02   .3510205E-02   .3417175E-02
   .3334201E-02   .3345052E-02   .3516244E-02   .3820726E-02   .4191949E-02
   .4557794E-02   .4819133E-02   .4912601E-02   .4873330E-02   .4759129E-02
   .4590109E-02   .4409889E-02   .4266901E-02   .4189642E-02   .4186221E-02
   .4227681E-02   .4275183E-02   .4357490E-02   .4500110E-02   .4643629E-02
   .4725434E-02   .4741688E-02   .4687742E-02   .4552596E-02   .4360059E-02
   .4132970E-02   .3931900E-02   .3822105E-02   .3790114E-02   .3803923E-02
   .3877547E-02   .4010225E-02   .4121114E-02   .4120435E-02   .3990028E-02
   .3804777E-02   .3677892E-02   .3671157E-02   .3767656E-02   .3873881E-02
   .3933001E-02   .3977155E-02   .3978503E-02   .3837571E-02   .3536659E-02
   .3169059E-02   .2847543E-02   .2630152E-02   .2510465E-02   .2486654E-02
   .2536454E-02   .2597870E-02   .2653598E-02   .2721613E-02   .2792419E-02
   .2874456E-02   .2985239E-02   .3138870E-02   .3365005E-02   .3642833E-02
   .3911119E-02   .4145175E-02   .4373539E-02   .4615052E-02   .4845272E-02
   .4997815E-02   .5003154E-02   .4832509E-02   .4547588E-02   .4218905E-02
   .3884348E-02   .3574100E-02   .3317153E-02   .3176679E-02   .3176584E-02
   .3253222E-02   .3337563E-02   .3452055E-02   .3645609E-02   .3860177E-02
   .3978831E-02   .3972635E-02   .3908026E-02   .3851929E-02   .3852098E-02
   .3907449E-02   .3981408E-02   .4082838E-02   .4245172E-02   .4394480E-02
   .4402744E-02   .4238960E-02   .3965649E-02   .3638546E-02   .3307589E-02
   .3049814E-02   .2867294E-02   .2727729E-02   .2659284E-02   .2649668E-02
   .2637193E-02   .2618839E-02   .2665414E-02   .2866591E-02   .3201082E-02
   .3548701E-02   .3801231E-02   .3907172E-02   .3841874E-02   .3602341E-02
   .3225164E-02   .2795090E-02   .2417039E-02   .2179046E-02   .2083042E-02
   .2043426E-02   .1967334E-02   .1811158E-02   .1590874E-02   .1373728E-02
   .1210217E-02   .1100711E-02   .1047009E-02   .1028154E-02   .1010976E-02
   .9679133E-03   .8907832E-03   .8244290E-03   .7891384E-03   .7542202E-03
   .6872283E-03   .5712114E-03   .4342929E-03   .3195907E-03   .2744427E-03
   .3416944E-03   .5405853E-03   .7928332E-03   .1002858E-02   .1149801E-02
   .1229737E-02   .1241605E-02   .1193981E-02   .1097122E-02   .9638591E-03
   .8051659E-03   .6417929E-03   .5065326E-03   .4394618E-03   .4268288E-03
   .4235367E-03   .4110188E-03   .3957733E-03   .3853808E-03   .3940693E-03
   .4681811E-03   .6053560E-03   .7748193E-03   .9407266E-03   .1067698E-02
   .1133541E-02   .1146244E-02   .1103254E-02   .1001716E-02   .8815739E-03
   .7825985E-03   .6942874E-03   .5894781E-03   .4758545E-03   .3601982E-03
   .2250918E-03   .7085940E-04  -.6431319E-04  -.1055714E-03  -.2821555E-04
   .9589124E-04   .1809274E-03   .1824850E-03   .1269150E-03   .1073356E-03
   .1933685E-03   .3962413E-03   .6685350E-03   .9548880E-03   .1199005E-02
   .1319746E-02   .1337876E-02   .1304443E-02   .1238180E-02   .1157343E-02
   .1073479E-02   .9892052E-03   .9238913E-03   .8556241E-03   .7618513E-03
   .6669045E-03   .6087544E-03   .5976795E-03   .6388057E-03   .7639117E-03
   .9453595E-03   .1142338E-02   .1304702E-02   .1394863E-02   .1428450E-02
   .1437695E-02   .1457343E-02   .1517816E-02   .1624489E-02   .1767933E-02
   .1926983E-02   .2058362E-02   .2147154E-02   .2200089E-02   .2202688E-02
   .2139209E-02   .2014591E-02   .1894871E-02   .1854494E-02   .1872847E-02
   .1850038E-02   .1711559E-02   .1453912E-02   .1127832E-02   .7990507E-03
   .5419115E-03   .4579581E-03   .5998036E-03   .8897365E-03   .1201142E-02
   .1431435E-02   .1488186E-02   .1336629E-02   .1039305E-02   .7167650E-03
   .4661104E-03   .3259454E-03   .2848650E-03   .3098727E-03   .3718254E-03
   .4797295E-03   .6423556E-03   .7901667E-03   .8591226E-03   .8617091E-03
   .8554937E-03   .8621087E-03   .8602935E-03   .8582096E-03   .8327144E-03
   .7166403E-03   .4709932E-03   .1639307E-03  -.1081154E-03  -.2859449E-03
  -.3268528E-03  -.2680739E-03  -.2342988E-03  -.3032038E-03  -.4714385E-03
  -.6666293E-03  -.8103911E-03  -.8919226E-03  -.9200270E-03  -.9011503E-03
  -.8226304E-03  -.6954403E-03  -.5778903E-03  -.5353574E-03  -.5894049E-03
  -.6420044E-03  -.6117729E-03  -.4880935E-03  -.2673911E-03   .2853590E-04
   .3177089E-03   .5629362E-03   .7400624E-03   .8069030E-03   .7473228E-03
   .5789430E-03   .3305787E-03   .4622427E-04  -.2215877E-03  -.4248571E-03
  -.5456397E-03  -.6312829E-03  -.7446711E-03  -.8919463E-03  -.1089864E-02
  -.1377540E-02  -.1737411E-02  -.2088575E-02  -.2377299E-02  -.2566719E-02
  -.2596738E-02  -.2487388E-02  -.2303770E-02  -.2069873E-02  -.1854180E-02
  -.1753912E-02  -.1800062E-02  -.1952324E-02  -.2189731E-02  -.2487790E-02
  -.2777760E-02  -.3026602E-02  -.3211177E-02  -.3287262E-02  -.3258667E-02
  -.3176800E-02  -.3121683E-02  -.3153098E-02  -.3286460E-02  -.3472236E-02
  -.3649311E-02  -.3784004E-02  -.3863033E-02  -.3922113E-02  -.3959656E-02
  -.3943457E-02  -.3892113E-02  -.3849276E-02  -.3820066E-02  -.3799575E-02
  -.3786301E-02  -.3720675E-02  -.3578543E-02  -.3430397E-02  -.3363979E-02
  -.3431667E-02  -.3634740E-02  -.3953672E-02  -.4337168E-02  -.4722765E-02
  -.5067951E-02  -.5320677E-02  -.5459495E-02  -.5525319E-02  -.5605666E-02
  -.5763678E-02  -.5977415E-02  -.6200501E-02  -.6407004E-02  -.6553064E-02
  -.6612514E-02  -.6650076E-02  -.6736535E-02  -.6885016E-02  -.7072371E-02
  -.7243250E-02  -.7338393E-02  -.7334327E-02  -.7265466E-02  -.7164848E-02
  -.7042134E-02  -.6922786E-02  -.6848332E-02  -.6831997E-02  -.6804612E-02
  -.6683177E-02  -.6435264E-02  -.6048501E-02  -.5571921E-02  -.5069373E-02
  -.4612324E-02  -.4304433E-02  -.4211430E-02  -.4289730E-02  -.4422996E-02
  -.4529081E-02  -.4537193E-02  -.4431778E-02  -.4251424E-02  -.4074517E-02
  -.3969279E-02  -.3951396E-02  -.3989622E-02  -.4063645E-02  -.4132974E-02
  -.4141712E-02  -.4101033E-02  -.4081466E-02  -.4140064E-02  -.4276361E-02
  -.4428646E-02  -.4515978E-02  -.4517265E-02  -.4481944E-02  -.4474149E-02
  -.4524503E-02  -.4661229E-02  -.4914131E-02  -.5250686E-02  -.5560503E-02
  -.5767011E-02  -.5876391E-02  -.5919159E-02  -.5927298E-02  -.5908391E-02
  -.5877433E-02  -.5882876E-02  -.5938100E-02  -.6007610E-02  -.6052715E-02
  -.6042345E-02  -.5974242E-02  -.5882534E-02  -.5813891E-02  -.5781595E-02
  -.5758218E-02  -.5741983E-02  -.5755101E-02  -.5798342E-02  -.5851422E-02
  -.5893814E-02  -.5912933E-02  -.5918896E-02  -.5913222E-02  -.5853009E-02
  -.5687887E-02  -.5435477E-02  -.5189364E-02  -.5017963E-02  -.4940728E-02
  -.5010051E-02  -.5239867E-02  -.5551673E-02  -.5869635E-02  -.6104400E-02
  -.6197562E-02  -.6161924E-02  -.6043461E-02  -.5910182E-02  -.5875220E-02
  -.6010904E-02  -.6277620E-02  -.6562027E-02  -.6755615E-02  -.6801351E-02
  -.6677800E-02  -.6429907E-02  -.6183892E-02  -.6074058E-02  -.6145333E-02
  -.6325097E-02  -.6499334E-02  -.6602705E-02  -.6623075E-02  -.6610658E-02
  -.6588096E-02  -.6518656E-02  -.6382697E-02  -.6188574E-02  -.5933772E-02
  -.5633357E-02  -.5358695E-02  -.5162067E-02  -.5054012E-02  -.5010300E-02
  -.5025150E-02  -.5090525E-02  -.5147052E-02  -.5170178E-02  -.5153659E-02
  -.5076186E-02  -.4945730E-02  -.4800980E-02  -.4634439E-02  -.4413847E-02
  -.4146332E-02  -.3872317E-02  -.3620724E-02  -.3362010E-02  -.3098219E-02
  -.2875307E-02  -.2701667E-02  -.2606019E-02  -.2640116E-02  -.2822552E-02
  -.3091912E-02  -.3336609E-02  -.3475214E-02  -.3490310E-02  -.3391304E-02
  -.3211882E-02  -.3027374E-02  -.2912959E-02  -.2874170E-02  -.2890819E-02
  -.2970416E-02  -.3111093E-02  -.3309185E-02  -.3537138E-02  -.3744966E-02
  -.3862361E-02  -.3893371E-02  -.3885612E-02  -.3828272E-02  -.3681022E-02
  -.3476881E-02  -.3284256E-02  -.3112002E-02  -.2955963E-02  -.2818238E-02
  -.2734053E-02  -.2727301E-02  -.2782846E-02  -.2847925E-02  -.2896465E-02
  -.2968389E-02  -.3093893E-02  -.3264924E-02  -.3420296E-02  -.3504026E-02
  -.3514863E-02  -.3489617E-02  -.3468589E-02  -.3474090E-02  -.3500244E-02
  -.3545983E-02  -.3626098E-02  -.3789706E-02  -.4020997E-02  -.4214844E-02
  -.4276931E-02  -.4234376E-02  -.4207545E-02  -.4269844E-02  -.4427928E-02
  -.4616419E-02  -.4802655E-02  -.4986115E-02  -.5147719E-02  -.5276624E-02
  -.5350032E-02  -.5351211E-02  -.5309619E-02  -.5330346E-02  -.5458557E-02
  -.5600657E-02  -.5670938E-02  -.5632523E-02  -.5483763E-02  -.5272474E-02
  -.5065449E-02  -.4891703E-02  -.4742817E-02  -.4563582E-02  -.4325031E-02
  -.4052844E-02  -.3831513E-02  -.3726787E-02  -.3717000E-02  -.3789614E-02
  -.3922526E-02  -.4067084E-02  -.4198270E-02  -.4295272E-02  -.4336742E-02
  -.4343979E-02  -.4362154E-02  -.4438008E-02  -.4619254E-02  -.4863797E-02
  -.5062568E-02  -.5137916E-02  -.5056068E-02  -.4873090E-02  -.4669341E-02
  -.4524397E-02  -.4496853E-02  -.4587324E-02  -.4744520E-02  -.4937284E-02
  -.5145790E-02  -.5354411E-02  -.5572026E-02  -.5829817E-02  -.6121382E-02
  -.6376240E-02  -.6533138E-02  -.6594476E-02  -.6599772E-02  -.6553439E-02
  -.6450793E-02  -.6296289E-02  -.6123884E-02  -.5999567E-02  -.5947379E-02
  -.5925202E-02  -.5913277E-02  -.5941410E-02  -.6026549E-02  -.6169920E-02
  -.6380213E-02  -.6597977E-02  -.6719468E-02  -.6685570E-02  -.6527403E-02
  -.6317146E-02  -.6105668E-02  -.5913533E-02  -.5711934E-02  -.5479460E-02
  -.5262112E-02  -.5092506E-02  -.4963645E-02  -.4854356E-02  -.4765142E-02
  -.4695959E-02  -.4635319E-02  -.4598179E-02  -.4582593E-02  -.4527450E-02
  -.4379594E-02  -.4203722E-02  -.4092778E-02  -.4080918E-02  -.4143091E-02
  -.4212975E-02  -.4257795E-02  -.4240638E-02  -.4072608E-02  -.3729892E-02
  -.3298431E-02  -.2895193E-02  -.2631035E-02  -.2548667E-02  -.2610840E-02
  -.2751980E-02  -.2889150E-02  -.2911350E-02  -.2737178E-02  -.2386906E-02
  -.1949940E-02  -.1531798E-02  -.1246486E-02  -.1182157E-02  -.1336889E-02
  -.1620340E-02  -.1917453E-02  -.2154134E-02  -.2273127E-02  -.2238158E-02
  -.2078148E-02  -.1877290E-02  -.1698121E-02  -.1563715E-02  -.1464204E-02
  -.1389727E-02  -.1317285E-02  -.1247325E-02  -.1244881E-02  -.1332331E-02
  -.1477377E-02  -.1645630E-02  -.1821165E-02  -.2007419E-02  -.2174884E-02
  -.2268497E-02  -.2287764E-02  -.2281509E-02  -.2317975E-02  -.2452225E-02
  -.2675301E-02  -.2925544E-02  -.3139516E-02  -.3272670E-02  -.3292184E-02
  -.3228744E-02  -.3100751E-02  -.2906947E-02  -.2664336E-02  -.2392248E-02
  -.2088867E-02  -.1781334E-02  -.1544449E-02  -.1441767E-02  -.1472192E-02
  -.1555346E-02  -.1630210E-02  -.1688230E-02  -.1731169E-02  -.1727827E-02
  -.1630461E-02  -.1449720E-02  -.1279882E-02  -.1210016E-02  -.1215210E-02
  -.1225125E-02  -.1229968E-02  -.1240321E-02  -.1215690E-02  -.1150847E-02
  -.1054755E-02  -.9448069E-03  -.8386812E-03  -.7122555E-03  -.5885990E-03
  -.5203097E-03  -.4828959E-03  -.3978107E-03  -.2718787E-03  -.1200198E-03
   .3780258E-04   .1666403E-03   .2357888E-03   .2295972E-03   .1705077E-03
   .1057826E-03   .8695368E-04   .1248347E-03   .2298301E-03   .4024870E-03
   .5662424E-03   .6378135E-03   .5625133E-03   .3462821E-03   .5882571E-04
  -.2073580E-03  -.4068572E-03  -.5501735E-03  -.6144383E-03  -.5537463E-03
  -.3549033E-03  -.8160374E-04   .1966946E-03   .4406039E-03   .6314868E-03
   .7321560E-03   .6918381E-03   .5251023E-03   .3069594E-03   .9041198E-04
  -.1047985E-03  -.2532709E-03  -.3084255E-03  -.2588182E-03  -.1448388E-03
  -.3203677E-04   .2166571E-04  -.1590318E-04  -.1131499E-03  -.1653207E-03
  -.1327352E-03  -.7073225E-04  -.2413087E-04  -.3390617E-05  -.2364630E-04
  -.1003307E-03  -.1795306E-03  -.2140765E-03  -.2047559E-03  -.1495944E-03
  -.6939684E-04  -.1877960E-04  -.5380303E-05  -.2780689E-05  -.2026381E-04
  -.9542240E-04  -.2066353E-03  -.2799464E-03  -.2922471E-03  -.3033261E-03
  -.3617958E-03  -.4556246E-03  -.5354503E-03  -.5952921E-03  -.6758369E-03
  -.8039991E-03  -.9595719E-03  -.1114219E-02  -.1240874E-02  -.1293124E-02
  -.1269622E-02  -.1227028E-02  -.1220275E-02  -.1243358E-02  -.1267769E-02
  -.1324548E-02  -.1449652E-02  -.1614573E-02  -.1764538E-02  -.1830823E-02
  -.1792801E-02  -.1707792E-02  -.1614874E-02  -.1509991E-02  -.1401675E-02
  -.1295379E-02  -.1139350E-02  -.9205071E-03  -.7019475E-03  -.5245360E-03
  -.3780317E-03  -.2265328E-03  -.4379209E-04   .1697182E-03   .3730590E-03
   .5220569E-03   .5978052E-03   .6445013E-03   .7731444E-03   .1045128E-02
   .1420771E-02   .1757616E-02   .1903074E-02   .1814213E-02   .1512424E-02
   .1077029E-02   .6441708E-03   .3633418E-03   .3487011E-03   .6226840E-03
   .1095479E-02   .1616323E-02   .2015070E-02   .2158861E-02   .2077838E-02
   .1924879E-02   .1856266E-02   .1949717E-02   .2191053E-02   .2505216E-02
   .2796329E-02   .2971040E-02   .2980163E-02   .2872590E-02   .2749193E-02
   .2717113E-02   .2832835E-02   .3059519E-02   .3268200E-02   .3383359E-02
   .3375427E-02   .3220714E-02   .2990900E-02   .2798607E-02   .2700472E-02
   .2696745E-02   .2749356E-02   .2791816E-02   .2748353E-02   .2572987E-02
   .2310299E-02   .2042454E-02   .1868971E-02   .1859153E-02   .2032600E-02
   .2342615E-02   .2658226E-02   .2854939E-02   .2858811E-02   .2668168E-02
   .2436920E-02   .2331498E-02   .2378531E-02   .2525499E-02   .2721078E-02
   .2909924E-02   .3050639E-02   .3139793E-02   .3220046E-02   .3377347E-02
   .3706411E-02   .4184886E-02   .4644249E-02   .4922965E-02   .5001338E-02
   .4949888E-02   .4831224E-02   .4714453E-02   .4641634E-02   .4614621E-02
   .4624247E-02   .4638377E-02   .4584544E-02   .4393427E-02   .4127867E-02
   .3907648E-02   .3764136E-02   .3679863E-02   .3637272E-02   .3637723E-02
   .3632765E-02   .3562371E-02   .3448866E-02   .3376479E-02   .3427101E-02
   .3620476E-02   .3920332E-02   .4260948E-02   .4590794E-02   .4855878E-02
   .5003483E-02   .5032255E-02   .5001679E-02   .4995342E-02   .5078937E-02
   .5257237E-02   .5447518E-02   .5551163E-02   .5563218E-02   .5537033E-02
   .5496051E-02   .5438729E-02   .5382049E-02   .5347718E-02   .5335283E-02
   .5317585E-02   .5239938E-02   .5099293E-02   .4974461E-02   .4927902E-02
   .4958548E-02   .5045934E-02   .5199276E-02   .5422511E-02   .5647500E-02
   .5795488E-02   .5841033E-02   .5817618E-02   .5775894E-02   .5736101E-02
   .5715395E-02   .5699568E-02   .5618093E-02   .5466274E-02   .5303566E-02
   .5170152E-02   .5095982E-02   .5107827E-02   .5177813E-02   .5236043E-02
   .5255431E-02   .5249828E-02   .5231942E-02   .5193521E-02   .5126483E-02
   .5042932E-02   .4947885E-02   .4823795E-02   .4723134E-02   .4688772E-02
   .4706927E-02   .4754944E-02   .4812473E-02   .4822786E-02   .4748216E-02
   .4593479E-02   .4380540E-02   .4188027E-02   .4163215E-02   .4381467E-02
   .4741584E-02   .5063131E-02   .5205161E-02   .5118769E-02   .4835576E-02
   .4443137E-02   .4046806E-02   .3758002E-02   .3639873E-02   .3670297E-02
   .3786283E-02   .3919610E-02   .4050863E-02   .4147435E-02   .4157771E-02
   .4081804E-02   .3964729E-02   .3869089E-02   .3815421E-02   .3796599E-02
   .3820121E-02   .3867080E-02   .3917708E-02   .3997410E-02   .4117146E-02
   .4249512E-02   .4360252E-02   .4424492E-02   .4468334E-02   .4546136E-02
   .4705897E-02   .4964843E-02   .5269873E-02   .5557640E-02   .5813563E-02
   .6062147E-02   .6268617E-02   .6392813E-02   .6464275E-02   .6540877E-02
   .6653164E-02   .6769416E-02   .6860932E-02   .6924858E-02   .6927441E-02
   .6872114E-02   .6824049E-02   .6816878E-02   .6847835E-02   .6920934E-02
   .7018850E-02   .7127892E-02   .7232992E-02   .7300070E-02   .7331935E-02
   .7353636E-02   .7410325E-02   .7543704E-02   .7764296E-02   .7996173E-02
   .8140760E-02   .8144388E-02   .8014950E-02   .7821199E-02   .7575178E-02
   .7271132E-02   .6989887E-02   .6839542E-02   .6868024E-02   .7066687E-02
   .7339658E-02   .7541909E-02   .7618885E-02   .7586098E-02   .7473759E-02
   .7390827E-02   .7453886E-02   .7644781E-02   .7862935E-02   .8073974E-02
   .8296676E-02   .8494432E-02   .8602128E-02   .8591094E-02   .8457226E-02
   .8278693E-02   .8186993E-02   .8192405E-02   .8190949E-02   .8150366E-02
   .8075872E-02   .7968311E-02   .7880703E-02   .7874163E-02   .7993220E-02
   .8248726E-02   .8540864E-02   .8736082E-02   .8796034E-02   .8756966E-02
   .8648957E-02   .8513435E-02   .8378228E-02   .8280413E-02   .8248338E-02
   .8263902E-02   .8245819E-02   .8173541E-02   .8082856E-02   .7972469E-02
   .7809461E-02   .7585747E-02   .7366359E-02   .7220135E-02   .7201002E-02
   .7305969E-02   .7508433E-02   .7766103E-02   .7934432E-02   .7875331E-02
   .7591123E-02   .7193450E-02   .6827716E-02   .6594027E-02   .6483147E-02
   .6441364E-02   .6409509E-02   .6334792E-02   .6169334E-02   .5894159E-02
   .5557074E-02   .5244301E-02   .5001837E-02   .4861934E-02   .4854268E-02
   .4957664E-02   .5128519E-02   .5311752E-02   .5430612E-02   .5424085E-02
   .5319195E-02   .5140553E-02   .4876202E-02   .4598338E-02   .4428267E-02
   .4403123E-02   .4482118E-02   .4568142E-02   .4599669E-02   .4609951E-02
   .4590579E-02   .4536476E-02   .4516051E-02   .4593198E-02   .4800304E-02
   .5091590E-02   .5332242E-02   .5396600E-02   .5258519E-02   .4979333E-02
   .4661260E-02   .4410991E-02   .4339485E-02   .4489673E-02   .4802329E-02
   .5120186E-02   .5279501E-02   .5203182E-02   .4952710E-02   .4639475E-02
   .4355235E-02   .4196411E-02   .4195254E-02   .4279937E-02   .4314750E-02
   .4226131E-02   .4011789E-02   .3726289E-02   .3453333E-02   .3251149E-02
   .3177785E-02   .3242496E-02   .3374065E-02   .3472008E-02   .3441820E-02
   .3229765E-02   .2899961E-02   .2580232E-02   .2366025E-02   .2307416E-02
   .2416323E-02   .2636096E-02   .2847497E-02   .2960548E-02   .2963931E-02
   .2878477E-02   .2722067E-02   .2528353E-02   .2371029E-02   .2345880E-02
   .2493006E-02   .2729606E-02   .2960194E-02   .3126911E-02   .3246792E-02
   .3386243E-02   .3543009E-02   .3629194E-02   .3584410E-02   .3507836E-02
   .3508118E-02   .3602815E-02   .3738121E-02   .3833517E-02   .3835379E-02
   .3755220E-02   .3644535E-02   .3532119E-02   .3417204E-02   .3264991E-02
   .3084800E-02   .2947597E-02   .2885608E-02   .2885699E-02   .2925061E-02
   .3005440E-02   .3157753E-02   .3355477E-02   .3560847E-02   .3771705E-02
   .3942025E-02   .3995288E-02   .3874794E-02   .3601908E-02   .3294380E-02
   .3082666E-02   .3059819E-02   .3220830E-02   .3459654E-02   .3672538E-02
   .3779678E-02   .3725523E-02   .3485451E-02   .3123093E-02   .2810654E-02
   .2673186E-02   .2722800E-02   .2903963E-02   .3172988E-02   .3455664E-02
   .3672129E-02   .3789096E-02   .3783310E-02   .3650645E-02   .3400070E-02
   .3097877E-02   .2812448E-02   .2542114E-02   .2270813E-02   .2027798E-02
   .1882044E-02   .1872276E-02   .1977943E-02   .2129192E-02   .2251403E-02
   .2274988E-02   .2140740E-02   .1845603E-02   .1470903E-02   .1106883E-02
   .7667573E-03   .4203749E-03   .7464349E-04  -.2057561E-03  -.3401939E-03
  -.2799735E-03  -.3873915E-04   .2808699E-03   .5615983E-03   .7394552E-03
   .7954632E-03   .7338136E-03   .5741170E-03   .3579448E-03   .1635941E-03
   .3059868E-04  -.6843248E-04  -.1695005E-03  -.3304003E-03  -.6107563E-03
  -.9440068E-03  -.1149297E-02  -.1137889E-02  -.9449816E-03  -.6398483E-03
  -.3535023E-03  -.2211755E-03  -.2734779E-03  -.4344874E-03  -.6172003E-03
  -.7761179E-03  -.9070128E-03  -.1020404E-02  -.1098772E-02  -.1129462E-02
  -.1149135E-02  -.1213378E-02  -.1327152E-02  -.1426119E-02  -.1461398E-02
  -.1434747E-02  -.1342187E-02  -.1228107E-02  -.1149579E-02  -.1113539E-02
  -.1130261E-02  -.1241961E-02  -.1439311E-02  -.1638997E-02  -.1760090E-02
  -.1773713E-02  -.1704363E-02  -.1589740E-02  -.1480823E-02  -.1382153E-02
  -.1268192E-02  -.1153600E-02  -.1112409E-02  -.1183128E-02  -.1369430E-02
  -.1694582E-02  -.2137298E-02  -.2620625E-02  -.3044065E-02  -.3344457E-02
  -.3528199E-02  -.3642725E-02  -.3691882E-02  -.3705205E-02  -.3740827E-02
  -.3825537E-02  -.3942227E-02  -.4049390E-02  -.4134808E-02  -.4205753E-02
  -.4258816E-02  -.4276868E-02  -.4296741E-02  -.4387406E-02  -.4546168E-02
  -.4699402E-02  -.4855314E-02  -.5032760E-02  -.5194557E-02  -.5322572E-02
  -.5466156E-02  -.5686176E-02  -.5979241E-02  -.6283703E-02  -.6507671E-02
  -.6585084E-02  -.6515950E-02  -.6356308E-02  -.6140850E-02  -.5852500E-02
  -.5494835E-02  -.5142905E-02  -.4871639E-02  -.4698518E-02  -.4634069E-02
  -.4649962E-02  -.4714461E-02  -.4786835E-02  -.4833011E-02  -.4841788E-02
  -.4818981E-02  -.4808536E-02  -.4818224E-02  -.4835823E-02  -.4872896E-02
  -.4959935E-02  -.5091848E-02  -.5228087E-02  -.5340068E-02  -.5414462E-02
  -.5439079E-02  -.5403295E-02  -.5299164E-02  -.5120187E-02  -.4894815E-02
  -.4675793E-02  -.4493411E-02  -.4311451E-02  -.4068733E-02  -.3764516E-02
  -.3483658E-02  -.3335169E-02  -.3370356E-02  -.3565738E-02  -.3832572E-02
  -.4115337E-02  -.4366246E-02  -.4465721E-02  -.4347593E-02  -.4018202E-02
  -.3543676E-02  -.3044338E-02  -.2641166E-02  -.2423625E-02  -.2422628E-02
  -.2594006E-02  -.2835535E-02  -.3058459E-02  -.3188054E-02  -.3197749E-02
  -.3164669E-02  -.3192676E-02  -.3304935E-02  -.3449674E-02  -.3582910E-02
  -.3703244E-02  -.3790747E-02  -.3814699E-02  -.3778123E-02  -.3716962E-02
  -.3655856E-02  -.3641915E-02  -.3708033E-02  -.3824851E-02  -.3960948E-02
  -.4046234E-02  -.4003477E-02  -.3822691E-02  -.3578064E-02  -.3344127E-02
  -.3125480E-02  -.2941395E-02  -.2833155E-02  -.2826937E-02  -.2924976E-02
  -.3078278E-02  -.3232079E-02  -.3383992E-02  -.3520429E-02  -.3611704E-02
  -.3653874E-02  -.3652288E-02  -.3646267E-02  -.3687592E-02  -.3778261E-02
  -.3905644E-02  -.4048764E-02  -.4148286E-02  -.4204613E-02  -.4249938E-02
  -.4311727E-02  -.4409167E-02  -.4543401E-02  -.4692498E-02  -.4838415E-02
  -.4978658E-02  -.5142735E-02  -.5373840E-02  -.5679964E-02  -.6011754E-02
  -.6288053E-02  -.6422272E-02  -.6379911E-02  -.6222009E-02  -.6039583E-02
  -.5877986E-02  -.5762718E-02  -.5710956E-02  -.5759663E-02  -.5897019E-02
  -.6045472E-02  -.6138003E-02  -.6141173E-02  -.6027307E-02  -.5801075E-02
  -.5482118E-02  -.5138179E-02  -.4891466E-02  -.4848334E-02  -.5007533E-02
  -.5292880E-02  -.5618320E-02  -.5908788E-02  -.6065100E-02  -.6001544E-02
  -.5767663E-02  -.5495037E-02  -.5262098E-02  -.5105149E-02  -.5055898E-02
  -.5125046E-02  -.5305599E-02  -.5530622E-02  -.5680364E-02  -.5644208E-02
  -.5380201E-02  -.4956215E-02  -.4570586E-02  -.4412628E-02  -.4545027E-02
  -.4856373E-02  -.5184699E-02  -.5431674E-02  -.5536637E-02  -.5500875E-02
  -.5358236E-02  -.5185560E-02  -.5062181E-02  -.5022324E-02  -.5083529E-02
  -.5228929E-02  -.5379137E-02  -.5415056E-02  -.5285965E-02  -.5058665E-02
  -.4857911E-02  -.4798820E-02  -.4906380E-02  -.5100111E-02  -.5271922E-02
  -.5350716E-02  -.5294285E-02  -.5108172E-02  -.4846458E-02  -.4618657E-02
  -.4520359E-02  -.4552079E-02  -.4613613E-02  -.4630721E-02  -.4583232E-02
  -.4450407E-02  -.4261914E-02  -.4085551E-02  -.3973135E-02  -.3953988E-02
  -.4048231E-02  -.4258965E-02  -.4550662E-02  -.4845553E-02  -.5036839E-02
  -.5107208E-02  -.5125056E-02  -.5140830E-02  -.5186018E-02  -.5264768E-02
  -.5327009E-02  -.5312335E-02  -.5211429E-02  -.5090248E-02  -.5044571E-02
  -.5081113E-02  -.5132132E-02  -.5140929E-02  -.5129228E-02  -.5117759E-02
  -.5099501E-02  -.5070642E-02  -.5033529E-02  -.5031381E-02  -.5091669E-02
  -.5174640E-02  -.5246621E-02  -.5260177E-02  -.5185707E-02  -.5028930E-02
  -.4812675E-02  -.4601809E-02  -.4492841E-02  -.4579761E-02  -.4863331E-02
  -.5224215E-02  -.5530083E-02  -.5723004E-02  -.5801008E-02  -.5805260E-02
  -.5765000E-02  -.5689004E-02  -.5645698E-02  -.5716246E-02  -.5899465E-02
  -.6090215E-02  -.6161574E-02  -.6089560E-02  -.5932204E-02  -.5741624E-02
  -.5580003E-02  -.5466235E-02  -.5359043E-02  -.5241138E-02  -.5172446E-02
  -.5177956E-02  -.5200669E-02  -.5172553E-02  -.5072482E-02  -.4944324E-02
  -.4834395E-02  -.4742856E-02  -.4666195E-02  -.4608465E-02  -.4586744E-02
  -.4614669E-02  -.4695352E-02  -.4853498E-02  -.5124635E-02  -.5462763E-02
  -.5755977E-02  -.5951844E-02  -.6032909E-02  -.5997098E-02  -.5917875E-02
  -.5876264E-02  -.5891050E-02  -.5941023E-02  -.5991868E-02  -.5976185E-02
  -.5879957E-02  -.5732704E-02  -.5566851E-02  -.5411922E-02  -.5299996E-02
  -.5268064E-02  -.5287599E-02  -.5328299E-02  -.5395897E-02  -.5489136E-02
  -.5565014E-02  -.5554996E-02  -.5455346E-02  -.5331347E-02  -.5225178E-02
  -.5116560E-02  -.5011122E-02  -.4946304E-02  -.4922929E-02  -.4892467E-02
  -.4812703E-02  -.4708020E-02  -.4612853E-02  -.4570627E-02  -.4626521E-02
  -.4754308E-02  -.4877698E-02  -.4977884E-02  -.5067158E-02  -.5099881E-02
  -.5013845E-02  -.4833979E-02  -.4647379E-02  -.4516648E-02  -.4446041E-02
  -.4428088E-02  -.4450031E-02  -.4486208E-02  -.4545193E-02  -.4625274E-02
  -.4692427E-02  -.4707931E-02  -.4649672E-02  -.4562279E-02  -.4530693E-02
  -.4600216E-02  -.4726807E-02  -.4838088E-02  -.4850429E-02  -.4757430E-02
  -.4599820E-02  -.4382039E-02  -.4096426E-02  -.3810334E-02  -.3616716E-02
  -.3553683E-02  -.3577813E-02  -.3608036E-02  -.3556389E-02  -.3380246E-02
  -.3089068E-02  -.2736707E-02  -.2398455E-02  -.2152003E-02  -.2045431E-02
  -.2067899E-02  -.2173176E-02  -.2273175E-02  -.2303671E-02  -.2269669E-02
  -.2199294E-02  -.2155754E-02  -.2209502E-02  -.2351594E-02  -.2522086E-02
  -.2659241E-02  -.2697415E-02  -.2594941E-02  -.2367769E-02  -.2070572E-02
  -.1778976E-02  -.1583103E-02  -.1533541E-02  -.1599415E-02  -.1729474E-02
  -.1884836E-02  -.2008263E-02  -.2027361E-02  -.1902854E-02  -.1695577E-02
  -.1517609E-02  -.1446581E-02  -.1479474E-02  -.1589987E-02  -.1734574E-02
  -.1882668E-02  -.1991925E-02  -.2002796E-02  -.1850510E-02  -.1558969E-02
  -.1257266E-02  -.1101914E-02  -.1174053E-02  -.1436630E-02  -.1767955E-02
  -.2051207E-02  -.2188984E-02  -.2156766E-02  -.2024420E-02  -.1906543E-02
  -.1933940E-02  -.2147103E-02  -.2451066E-02  -.2734938E-02  -.2961401E-02
  -.3088695E-02  -.3105318E-02  -.3045418E-02  -.2974396E-02  -.2927179E-02
  -.2930805E-02  -.2967742E-02  -.3002403E-02  -.2996152E-02  -.2963671E-02
  -.2957255E-02  -.2977236E-02  -.2991872E-02  -.3000048E-02  -.3019982E-02
  -.3045273E-02  -.3062931E-02  -.3041985E-02  -.2937985E-02  -.2753054E-02
  -.2566086E-02  -.2490021E-02  -.2539011E-02  -.2617002E-02  -.2657756E-02
  -.2675143E-02  -.2704324E-02  -.2752811E-02  -.2806523E-02  -.2850219E-02
  -.2869529E-02  -.2853538E-02  -.2795217E-02  -.2742624E-02  -.2765073E-02
  -.2871805E-02  -.3019648E-02  -.3139302E-02  -.3174509E-02  -.3107222E-02
  -.2960204E-02  -.2759013E-02  -.2537600E-02  -.2349139E-02  -.2262169E-02
  -.2344008E-02  -.2573377E-02  -.2879301E-02  -.3144947E-02  -.3255567E-02
  -.3194638E-02  -.3042039E-02  -.2863290E-02  -.2707411E-02  -.2624164E-02
  -.2622406E-02  -.2661238E-02  -.2713232E-02  -.2764662E-02  -.2763693E-02
  -.2648587E-02  -.2448770E-02  -.2254476E-02  -.2115240E-02  -.2052664E-02
  -.2090382E-02  -.2192545E-02  -.2295459E-02  -.2407528E-02  -.2532574E-02
  -.2601177E-02  -.2557439E-02  -.2409177E-02  -.2189354E-02  -.1900161E-02
  -.1591675E-02  -.1366130E-02  -.1287565E-02  -.1317607E-02  -.1372315E-02
  -.1393345E-02  -.1362981E-02  -.1311242E-02  -.1287981E-02  -.1332178E-02
  -.1404768E-02  -.1489633E-02  -.1624761E-02  -.1794272E-02  -.1900247E-02
  -.1817375E-02  -.1567672E-02  -.1271750E-02  -.1040843E-02  -.9344713E-03
  -.9323335E-03  -.9996532E-03  -.1109167E-02  -.1182750E-02  -.1127548E-02
  -.8997947E-03  -.5487067E-03  -.1740750E-03   .1365499E-03   .3572366E-03
   .4851755E-03   .5420251E-03   .5835661E-03   .6640281E-03   .8046305E-03
   .9762064E-03   .1131401E-02   .1198939E-02   .1158613E-02   .1020463E-02
   .8068996E-03   .5890071E-03   .4796190E-03   .5358252E-03   .7063789E-03
   .8721034E-03   .9328998E-03   .8330607E-03   .5911548E-03   .3117295E-03
   .1125450E-03   .1022277E-03   .2910237E-03   .6095399E-03   .9614108E-03
   .1208130E-02   .1286928E-02   .1222543E-02   .1069992E-02   .9515458E-03
   .9637738E-03   .1068014E-02   .1195394E-02   .1304433E-02   .1388063E-02
   .1493401E-02   .1671618E-02   .1921206E-02   .2196395E-02   .2401578E-02
   .2457989E-02   .2385546E-02   .2265890E-02   .2181634E-02   .2176350E-02
   .2288581E-02   .2550866E-02   .2928707E-02   .3306989E-02   .3570610E-02
   .3643012E-02   .3562028E-02   .3376651E-02   .3137293E-02   .2929576E-02
   .2809331E-02   .2778946E-02   .2809087E-02   .2868094E-02   .2916941E-02
   .2881004E-02   .2717327E-02   .2500884E-02   .2346669E-02   .2310366E-02
   .2402138E-02   .2621661E-02   .2937402E-02   .3259705E-02   .3476504E-02
   .3490660E-02   .3235704E-02   .2763908E-02   .2244095E-02   .1846521E-02
   .1650050E-02   .1664239E-02   .1845965E-02   .2141958E-02   .2451212E-02
   .2663013E-02   .2718931E-02   .2592374E-02   .2329915E-02   .2047843E-02
   .1880806E-02   .1897997E-02   .2056410E-02   .2232567E-02   .2282278E-02
   .2134836E-02   .1825072E-02   .1469468E-02   .1210468E-02   .1140189E-02
   .1255880E-02   .1485859E-02   .1745699E-02   .1961167E-02   .2058400E-02
   .2015100E-02   .1855285E-02   .1639681E-02   .1422208E-02   .1207089E-02
   .1021427E-02   .8971708E-03   .8542166E-03   .9063424E-03   .9934090E-03
   .1069898E-02   .1154149E-02   .1270307E-02   .1429344E-02   .1623642E-02
   .1803335E-02   .1941743E-02   .2053265E-02   .2180883E-02   .2330245E-02
   .2491116E-02   .2629313E-02   .2696603E-02   .2701864E-02   .2713069E-02
   .2753564E-02   .2787200E-02   .2789681E-02   .2776384E-02   .2784636E-02
   .2834097E-02   .2922803E-02   .3043887E-02   .3206894E-02   .3396482E-02
   .3545384E-02   .3608766E-02   .3632943E-02   .3676979E-02   .3752085E-02
   .3853293E-02   .3942720E-02   .3983560E-02   .3943605E-02   .3815220E-02
   .3663989E-02   .3578213E-02   .3588652E-02   .3653527E-02   .3699155E-02
   .3682793E-02   .3627770E-02   .3567625E-02   .3523010E-02   .3538365E-02
   .3608760E-02   .3692103E-02   .3742614E-02   .3716326E-02   .3582155E-02
   .3355716E-02   .3080740E-02   .2870690E-02   .2847499E-02   .3043933E-02
   .3404642E-02   .3802174E-02   .4069884E-02   .4109846E-02   .3950104E-02
   .3716818E-02   .3528575E-02   .3472557E-02   .3581150E-02   .3825381E-02
   .4144017E-02   .4420475E-02   .4522023E-02   .4422009E-02   .4153518E-02
   .3799391E-02   .3486331E-02   .3304534E-02   .3309966E-02   .3513361E-02
   .3871194E-02   .4292373E-02   .4653679E-02   .4861392E-02   .4891338E-02
   .4776068E-02   .4560453E-02   .4323794E-02   .4154326E-02   .4117259E-02
   .4207024E-02   .4349291E-02   .4479082E-02   .4579442E-02   .4646830E-02
   .4655701E-02   .4598477E-02   .4503532E-02   .4388733E-02   .4248573E-02
   .4111341E-02   .4029117E-02   .4010437E-02   .4029062E-02   .4095312E-02
   .4237924E-02   .4451360E-02   .4660390E-02   .4828555E-02   .4987378E-02
   .5171843E-02   .5369625E-02   .5537557E-02   .5669726E-02   .5788394E-02
   .5911766E-02   .6031328E-02   .6151986E-02   .6246117E-02   .6268589E-02
   .6222346E-02   .6169613E-02   .6159526E-02   .6202323E-02   .6275122E-02
   .6356312E-02   .6451713E-02   .6590753E-02   .6760243E-02   .6884193E-02
   .6932401E-02   .6917594E-02   .6871561E-02   .6828859E-02   .6805942E-02
   .6796099E-02   .6738894E-02   .6601283E-02   .6423445E-02   .6260382E-02
   .6147799E-02   .6112840E-02   .6163001E-02   .6275144E-02   .6436209E-02
   .6636015E-02   .6841151E-02   .6997041E-02   .7034471E-02   .6991925E-02
   .6916447E-02   .6813099E-02   .6685973E-02   .6529631E-02   .6331908E-02
   .6163457E-02   .6100669E-02   .6130271E-02   .6191064E-02   .6238300E-02
   .6266090E-02   .6269628E-02   .6233188E-02   .6151937E-02   .6033804E-02
   .5884692E-02   .5693422E-02   .5471816E-02   .5267350E-02   .5122876E-02
   .5076656E-02   .5117942E-02   .5228343E-02   .5364427E-02   .5416607E-02
   .5290193E-02   .5033525E-02   .4747033E-02   .4499217E-02   .4344138E-02
   .4329571E-02   .4471440E-02   .4730751E-02   .5029914E-02   .5281103E-02
   .5432164E-02   .5477417E-02   .5454117E-02   .5410789E-02   .5360129E-02
   .5303368E-02   .5283254E-02   .5326727E-02   .5408956E-02   .5472768E-02
   .5490024E-02   .5461792E-02   .5412883E-02   .5366291E-02   .5302952E-02
   .5202636E-02   .5061966E-02   .4915264E-02   .4810527E-02   .4779623E-02
   .4810121E-02   .4849638E-02   .4864957E-02   .4847478E-02   .4825505E-02
   .4847987E-02   .4946386E-02   .5072024E-02   .5169467E-02   .5210896E-02
   .5203004E-02   .5105883E-02   .4895854E-02   .4629091E-02   .4400541E-02
   .4293815E-02   .4335624E-02   .4450425E-02   .4526436E-02   .4529584E-02
   .4468467E-02   .4366966E-02   .4252641E-02   .4160040E-02   .4104414E-02
   .4077773E-02   .4012869E-02   .3842799E-02   .3600175E-02   .3389952E-02
   .3304151E-02   .3344246E-02   .3451685E-02   .3591913E-02   .3762422E-02
   .3942496E-02   .4110365E-02   .4217397E-02   .4213091E-02   .4100776E-02
   .3915529E-02   .3696864E-02   .3501691E-02   .3345991E-02   .3209627E-02
   .3092210E-02   .3005465E-02   .2953821E-02   .2927606E-02   .2961449E-02
   .3071854E-02   .3178451E-02   .3218823E-02   .3166153E-02   .3052387E-02
   .2948536E-02   .2848827E-02   .2702535E-02   .2506145E-02   .2311632E-02
   .2162245E-02   .2052976E-02   .1923171E-02   .1759715E-02   .1636937E-02
   .1625714E-02   .1731761E-02   .1894769E-02   .2049894E-02   .2134792E-02
   .2102599E-02   .1968799E-02   .1787612E-02   .1617599E-02   .1501657E-02
   .1455400E-02   .1479686E-02   .1575330E-02   .1725872E-02   .1924336E-02
   .2152857E-02   .2394000E-02   .2615159E-02   .2758767E-02   .2795230E-02
   .2745216E-02   .2654264E-02   .2552871E-02   .2477499E-02   .2457960E-02
   .2454863E-02   .2404403E-02   .2316957E-02   .2246988E-02   .2257236E-02
   .2401882E-02   .2686431E-02   .3010979E-02   .3256744E-02   .3352487E-02
   .3306948E-02   .3170562E-02   .3037147E-02   .2955142E-02   .2915543E-02
   .2912209E-02   .2924821E-02   .2930899E-02   .2938903E-02   .2950163E-02
   .2893111E-02   .2739076E-02   .2558053E-02   .2443238E-02   .2421299E-02
   .2457543E-02   .2517575E-02   .2604613E-02   .2700881E-02   .2759571E-02
   .2775059E-02   .2762827E-02   .2710374E-02   .2612593E-02   .2461640E-02
   .2246321E-02   .2028121E-02   .1866607E-02   .1736047E-02   .1608437E-02
   .1523805E-02   .1531444E-02   .1672597E-02   .1900319E-02   .2118968E-02
   .2237328E-02   .2209079E-02   .2089301E-02   .1976968E-02   .1946892E-02
   .2016404E-02   .2167345E-02   .2381975E-02   .2611305E-02   .2794053E-02
   .2913341E-02   .2938912E-02   .2880387E-02   .2819666E-02   .2789038E-02
   .2828408E-02   .2922671E-02   .3006578E-02   .3067382E-02   .3124398E-02
   .3195000E-02   .3280524E-02   .3396249E-02   .3530923E-02   .3673292E-02
   .3796791E-02   .3860880E-02   .3817581E-02   .3613706E-02   .3239556E-02
   .2800254E-02   .2439232E-02   .2237171E-02   .2238993E-02   .2446834E-02
   .2756367E-02   .3011341E-02   .3088788E-02   .2949506E-02   .2651834E-02
   .2309181E-02   .2046376E-02   .1923207E-02   .1887627E-02   .1891843E-02
   .1911317E-02   .1921036E-02   .1904107E-02   .1849945E-02   .1788091E-02
   .1735314E-02   .1697159E-02   .1657434E-02   .1633715E-02   .1682282E-02
   .1796206E-02   .1934796E-02   .2067003E-02   .2178081E-02   .2255377E-02
   .2285590E-02   .2260979E-02   .2143989E-02   .1934775E-02   .1732310E-02
   .1599652E-02   .1553924E-02   .1603627E-02   .1740536E-02   .1930960E-02
   .2097270E-02   .2166512E-02   .2086015E-02   .1875575E-02   .1613409E-02
   .1374318E-02   .1191926E-02   .1048765E-02   .9475261E-03   .9039726E-03
   .9054316E-03   .9404630E-03   .1022661E-02   .1130539E-02   .1210606E-02
   .1209487E-02   .1106690E-02   .9450759E-03   .7423674E-03   .4956691E-03
   .2225344E-03  -.5053390E-04  -.2645869E-03  -.3897757E-03  -.4360985E-03
  -.4239933E-03  -.3855912E-03  -.3222867E-03  -.2128837E-03  -.9075381E-04
  -.1051563E-04   .5099107E-04   .1178467E-03   .1344330E-03   .8064483E-04
   .3488036E-04   .3331160E-04   .4631018E-04   .6353214E-04   .9469671E-04
   .1193465E-03   .9268593E-04   .9660172E-05  -.1448213E-03  -.3654241E-03
  -.6075805E-03  -.8094946E-03  -.9241426E-03  -.9347296E-03  -.8580642E-03
  -.7602313E-03  -.7159730E-03  -.7334855E-03  -.7984466E-03  -.8643564E-03
  -.8997589E-03  -.9117434E-03  -.9221173E-03  -.9664630E-03  -.1058808E-02
  -.1209953E-02  -.1415328E-02  -.1661557E-02  -.1891372E-02  -.1996515E-02
  -.1958171E-02  -.1852453E-02  -.1767056E-02  -.1736337E-02  -.1763905E-02
  -.1817743E-02  -.1842921E-02  -.1797722E-02  -.1679848E-02  -.1530409E-02
  -.1433706E-02  -.1441397E-02  -.1567900E-02  -.1788716E-02  -.2033976E-02
  -.2267359E-02  -.2498420E-02  -.2694719E-02  -.2833016E-02  -.2960611E-02
  -.3091515E-02  -.3181874E-02  -.3161871E-02  -.2989146E-02  -.2726877E-02
  -.2487621E-02  -.2352951E-02  -.2357004E-02  -.2486552E-02  -.2729522E-02
  -.2993695E-02  -.3151085E-02  -.3186385E-02  -.3128890E-02  -.3030295E-02
  -.2986548E-02  -.3079987E-02  -.3283290E-02  -.3487186E-02  -.3615252E-02
  -.3640101E-02  -.3585687E-02  -.3522616E-02  -.3521703E-02  -.3621806E-02
  -.3820769E-02  -.4085585E-02  -.4356206E-02  -.4548571E-02  -.4587040E-02
  -.4494180E-02  -.4371854E-02  -.4313823E-02  -.4365579E-02  -.4485107E-02
  -.4590625E-02  -.4611578E-02  -.4570313E-02  -.4542662E-02  -.4581728E-02
  -.4688631E-02  -.4848219E-02  -.5076369E-02  -.5347304E-02  -.5551379E-02
  -.5553139E-02  -.5348376E-02  -.5054836E-02  -.4775657E-02  -.4562467E-02
  -.4457369E-02  -.4458162E-02  -.4524814E-02  -.4607364E-02  -.4667339E-02
  -.4691627E-02  -.4706415E-02  -.4750297E-02  -.4808391E-02  -.4849525E-02
  -.4849687E-02  -.4772812E-02  -.4617276E-02  -.4404046E-02  -.4169493E-02
  -.3994406E-02  -.3920773E-02  -.3933753E-02  -.4011064E-02  -.4145504E-02
  -.4332756E-02  -.4541401E-02  -.4719421E-02  -.4796555E-02  -.4756557E-02
  -.4673571E-02  -.4626931E-02  -.4649959E-02  -.4745648E-02  -.4886060E-02
  -.5025805E-02  -.5102135E-02  -.5092593E-02  -.4983287E-02  -.4789533E-02
  -.4583209E-02  -.4430180E-02  -.4376634E-02  -.4431145E-02  -.4547693E-02
  -.4653752E-02  -.4714616E-02  -.4739860E-02  -.4732309E-02  -.4703036E-02
  -.4705847E-02  -.4829275E-02  -.5113340E-02  -.5504614E-02  -.5875122E-02
  -.6068695E-02  -.6016879E-02  -.5816812E-02  -.5635188E-02  -.5566560E-02
  -.5612913E-02  -.5729136E-02  -.5889631E-02  -.6051523E-02  -.6106602E-02
  -.6025929E-02  -.5861912E-02  -.5671689E-02  -.5512637E-02  -.5424396E-02
  -.5444412E-02  -.5550910E-02  -.5645630E-02  -.5658786E-02  -.5584876E-02
  -.5430360E-02  -.5228380E-02  -.5012366E-02  -.4818241E-02  -.4678204E-02
  -.4581332E-02  -.4519417E-02  -.4500407E-02  -.4506637E-02  -.4555418E-02
  -.4666311E-02  -.4783146E-02  -.4856982E-02  -.4892254E-02  -.4941916E-02
  -.5028230E-02  -.5119682E-02  -.5154027E-02  -.5098453E-02  -.4982211E-02
  -.4877511E-02  -.4839485E-02  -.4874926E-02  -.4930867E-02  -.4951416E-02
  -.4956506E-02  -.5006367E-02  -.5087452E-02  -.5144022E-02  -.5152423E-02
  -.5131022E-02  -.5124443E-02  -.5150646E-02  -.5180794E-02  -.5171062E-02
  -.5078107E-02  -.4892993E-02  -.4651410E-02  -.4399354E-02  -.4156819E-02
  -.3981050E-02  -.3929074E-02  -.3975958E-02  -.4087342E-02  -.4212287E-02
  -.4291645E-02  -.4282154E-02  -.4161537E-02  -.3942123E-02  -.3674773E-02
  -.3430282E-02  -.3267466E-02  -.3189371E-02  -.3165665E-02  -.3178755E-02
  -.3215995E-02  -.3254906E-02  -.3299818E-02  -.3366390E-02  -.3473321E-02
  -.3641117E-02  -.3896566E-02  -.4179679E-02  -.4366451E-02  -.4396043E-02
  -.4280936E-02  -.4091079E-02  -.3932125E-02  -.3843376E-02  -.3833517E-02
  -.3947051E-02  -.4182094E-02  -.4473678E-02  -.4742683E-02  -.4931490E-02
  -.5034583E-02  -.5072753E-02  -.5080254E-02  -.5082534E-02  -.5088270E-02
  -.5080942E-02  -.5071989E-02  -.5098431E-02  -.5154523E-02  -.5236178E-02
  -.5342558E-02  -.5460790E-02  -.5575858E-02  -.5640552E-02  -.5635456E-02
  -.5571771E-02  -.5483788E-02  -.5389605E-02  -.5291521E-02  -.5204828E-02
  -.5164465E-02  -.5188871E-02  -.5265477E-02  -.5375080E-02  -.5522404E-02
  -.5693254E-02  -.5841596E-02  -.5994526E-02  -.6203302E-02  -.6421835E-02
  -.6571293E-02  -.6626440E-02  -.6587647E-02  -.6433542E-02  -.6166516E-02
  -.5861418E-02  -.5595559E-02  -.5410770E-02  -.5288426E-02  -.5173763E-02
  -.5032641E-02  -.4867296E-02  -.4730182E-02  -.4652715E-02  -.4623992E-02
  -.4623849E-02  -.4611515E-02  -.4559433E-02  -.4488552E-02  -.4432447E-02
  -.4426107E-02  -.4463641E-02  -.4521881E-02  -.4597578E-02  -.4724239E-02
  -.4878870E-02  -.4997241E-02  -.5041263E-02  -.5014577E-02  -.4929247E-02
  -.4804250E-02  -.4703486E-02  -.4693621E-02  -.4777413E-02  -.4929739E-02
  -.5064477E-02  -.5074542E-02  -.4925042E-02  -.4693034E-02  -.4474627E-02
  -.4315854E-02  -.4251108E-02  -.4295835E-02  -.4430067E-02  -.4590109E-02
  -.4687602E-02  -.4722396E-02  -.4719744E-02  -.4681440E-02  -.4644286E-02
  -.4646289E-02  -.4662352E-02  -.4625345E-02  -.4512720E-02  -.4334552E-02
  -.4133918E-02  -.3970063E-02  -.3904442E-02  -.3975872E-02  -.4164870E-02
  -.4408165E-02  -.4627876E-02  -.4700266E-02  -.4517126E-02  -.4113501E-02
  -.3656748E-02  -.3291848E-02  -.3094756E-02  -.3094217E-02  -.3227975E-02
  -.3381245E-02  -.3476950E-02  -.3511604E-02  -.3515381E-02  -.3520579E-02
  -.3522466E-02  -.3485290E-02  -.3423127E-02  -.3344823E-02  -.3213485E-02
  -.3009515E-02  -.2792627E-02  -.2669457E-02  -.2708173E-02  -.2877036E-02
  -.3079327E-02  -.3235085E-02  -.3303968E-02  -.3243397E-02  -.3018786E-02
  -.2654769E-02  -.2279134E-02  -.2061380E-02  -.2076608E-02  -.2290295E-02
  -.2619207E-02  -.2977294E-02  -.3280063E-02  -.3442730E-02  -.3412085E-02
  -.3237471E-02  -.3025819E-02  -.2869410E-02  -.2803024E-02  -.2800099E-02
  -.2821874E-02  -.2833848E-02  -.2794955E-02  -.2656191E-02  -.2422405E-02
  -.2184857E-02  -.2034844E-02  -.1991663E-02  -.2019825E-02  -.2071141E-02
  -.2090897E-02  -.2025555E-02  -.1895748E-02  -.1780287E-02  -.1748532E-02
  -.1803958E-02  -.1872578E-02  -.1924466E-02  -.1941143E-02  -.1888032E-02
  -.1781848E-02  -.1674803E-02  -.1605477E-02  -.1613182E-02  -.1731597E-02
  -.1970376E-02  -.2259106E-02  -.2460885E-02  -.2493382E-02  -.2392618E-02
  -.2229005E-02  -.2041078E-02  -.1858146E-02  -.1746117E-02  -.1721169E-02
  -.1703726E-02  -.1620266E-02  -.1438367E-02  -.1222482E-02  -.1094881E-02
  -.1087384E-02  -.1201031E-02  -.1462766E-02  -.1827967E-02  -.2160860E-02
  -.2366103E-02  -.2430979E-02  -.2386916E-02  -.2287164E-02  -.2198035E-02
  -.2086254E-02  -.1863773E-02  -.1558571E-02  -.1285158E-02  -.1163127E-02
  -.1197651E-02  -.1332802E-02  -.1555146E-02  -.1836919E-02  -.2114788E-02
  -.2289584E-02  -.2316620E-02  -.2236619E-02  -.2089502E-02  -.1890654E-02
  -.1678639E-02  -.1499823E-02  -.1402607E-02  -.1379765E-02  -.1410306E-02
  -.1527135E-02  -.1702066E-02  -.1832513E-02  -.1887501E-02  -.1876658E-02
  -.1738317E-02  -.1442583E-02  -.1056329E-02  -.6835799E-03  -.4140851E-03
  -.3185793E-03  -.4187611E-03  -.6517559E-03  -.9528431E-03  -.1237505E-02
  -.1413411E-02  -.1465463E-02  -.1432034E-02  -.1366464E-02  -.1320649E-02
  -.1289554E-02  -.1258645E-02  -.1211194E-02  -.1146251E-02  -.1062364E-02
  -.9385373E-03  -.7421132E-03  -.4950134E-03  -.2629429E-03  -.9923829E-04
  -.3794165E-04  -.5323443E-04  -.7761823E-04  -.4626149E-04   .7850203E-04
   .2499879E-03   .3702335E-03   .3057432E-03   .5816061E-05  -.4458487E-03
  -.9005728E-03  -.1226056E-02  -.1341833E-02  -.1255800E-02  -.1036088E-02
  -.7640418E-03  -.5639042E-03  -.5181930E-03  -.6036563E-03  -.7729532E-03
  -.9354872E-03  -.9654334E-03  -.8058237E-03  -.5052658E-03  -.1707292E-03
   .8881404E-04   .2418491E-03   .3373943E-03   .4317963E-03   .5724570E-03
   .7526156E-03   .9490683E-03   .1193185E-02   .1491336E-02   .1755577E-02
   .1910224E-02   .1995895E-02   .2080191E-02   .2178685E-02   .2272592E-02
   .2400341E-02   .2606564E-02   .2903957E-02   .3233472E-02   .3490789E-02
   .3606948E-02   .3599502E-02   .3534790E-02   .3465425E-02   .3421872E-02
   .3415545E-02   .3454859E-02   .3506114E-02   .3516685E-02   .3502194E-02
   .3508322E-02   .3518152E-02   .3487834E-02   .3418026E-02   .3355801E-02
   .3332400E-02   .3347832E-02   .3406822E-02   .3469507E-02   .3496261E-02
   .3476102E-02   .3420080E-02   .3373866E-02   .3392676E-02   .3464851E-02
   .3513812E-02   .3516625E-02   .3504236E-02   .3495406E-02   .3465519E-02
   .3370232E-02   .3212796E-02   .3036747E-02   .2892065E-02   .2799006E-02
   .2797367E-02   .2939599E-02   .3185264E-02   .3436173E-02   .3590958E-02
   .3565061E-02   .3341683E-02   .2991525E-02   .2652659E-02   .2460947E-02
   .2445334E-02   .2557147E-02   .2734161E-02   .2911017E-02   .3003324E-02
   .2968744E-02   .2831655E-02   .2673094E-02   .2626411E-02   .2796438E-02
   .3156304E-02   .3594806E-02   .4017907E-02   .4351285E-02   .4523789E-02
   .4503580E-02   .4371576E-02   .4227112E-02   .4124060E-02   .4061797E-02
   .4044271E-02   .4042934E-02   .4003328E-02   .3940238E-02   .3879945E-02
   .3859010E-02   .3916958E-02   .4026454E-02   .4189619E-02   .4443306E-02
   .4749951E-02   .5025243E-02   .5201547E-02   .5238156E-02   .5158387E-02
   .5049330E-02   .4921968E-02   .4773913E-02   .4657557E-02   .4647910E-02
   .4787913E-02   .5046607E-02   .5322517E-02   .5487129E-02   .5496217E-02
   .5393378E-02   .5242641E-02   .5073174E-02   .4897058E-02   .4775061E-02
   .4797720E-02   .4997719E-02   .5290690E-02   .5513385E-02   .5618986E-02
   .5681744E-02   .5746285E-02   .5807391E-02   .5917874E-02   .6141749E-02
   .6458182E-02   .6748528E-02   .6870169E-02   .6739669E-02   .6390418E-02
   .5948879E-02   .5578739E-02   .5394157E-02   .5423403E-02   .5610896E-02
   .5828670E-02   .5936536E-02   .5906927E-02   .5797845E-02   .5614182E-02
   .5341237E-02   .5031100E-02   .4794104E-02   .4726599E-02   .4836839E-02
   .5094376E-02   .5438503E-02   .5797964E-02   .6068074E-02   .6152398E-02
   .6076880E-02   .5966552E-02   .5913176E-02   .5907068E-02   .5893905E-02
   .5856809E-02   .5781677E-02   .5691852E-02   .5655451E-02   .5704003E-02
   .5805955E-02   .5935299E-02   .6057445E-02   .6123711E-02   .6087683E-02
   .5940913E-02   .5748579E-02   .5605402E-02   .5594601E-02   .5753684E-02
   .6048555E-02   .6435424E-02   .6869099E-02   .7245679E-02   .7456646E-02
   .7446751E-02   .7221130E-02   .6833104E-02   .6373103E-02   .5962580E-02
   .5728068E-02   .5704713E-02   .5843648E-02   .6113099E-02   .6495481E-02
   .6947988E-02   .7354126E-02   .7599430E-02   .7650343E-02   .7577365E-02
   .7480298E-02   .7423004E-02   .7433355E-02   .7464902E-02   .7439525E-02
   .7374678E-02   .7343345E-02   .7352625E-02   .7358979E-02   .7325037E-02
   .7234702E-02   .7155601E-02   .7160136E-02   .7238612E-02   .7331173E-02
   .7388194E-02   .7351015E-02   .7210862E-02   .7045600E-02   .6927304E-02
   .6883127E-02   .6934600E-02   .7088270E-02   .7280185E-02   .7403347E-02
   .7413419E-02   .7308028E-02   .7094951E-02   .6825810E-02   .6614206E-02
   .6591784E-02   .6831367E-02   .7293958E-02   .7803677E-02   .8181280E-02
   .8339332E-02   .8260529E-02   .7982268E-02   .7626082E-02   .7360556E-02
   .7324437E-02   .7518631E-02   .7828360E-02   .8105929E-02   .8256417E-02
   .8260490E-02   .8165457E-02   .8040726E-02   .7927136E-02   .7885826E-02
   .7974641E-02   .8164499E-02   .8369177E-02   .8480335E-02   .8436363E-02
   .8291070E-02   .8158775E-02   .8157023E-02   .8348218E-02   .8683783E-02
   .9049735E-02   .9334185E-02   .9447378E-02   .9349705E-02   .9069362E-02
   .8698921E-02   .8388262E-02   .8214279E-02   .8158361E-02   .8201623E-02
   .8322834E-02   .8449531E-02   .8477341E-02   .8391423E-02   .8262991E-02
   .8193760E-02   .8225059E-02   .8329302E-02   .8448906E-02   .8523785E-02
   .8540115E-02   .8557229E-02   .8613805E-02   .8688393E-02   .8724671E-02
   .8689006E-02   .8618506E-02   .8531793E-02   .8402440E-02   .8197985E-02
   .7916980E-02   .7582413E-02   .7258978E-02   .7001779E-02   .6791500E-02
   .6569447E-02   .6378270E-02   .6306410E-02   .6307511E-02   .6282937E-02
   .6171057E-02   .5944073E-02   .5684137E-02   .5492548E-02   .5396870E-02
   .5392488E-02   .5459533E-02   .5612148E-02   .5879283E-02   .6232790E-02
   .6552660E-02   .6732393E-02   .6736277E-02   .6540088E-02   .6213352E-02
   .5873097E-02   .5603001E-02   .5468052E-02   .5516461E-02   .5715137E-02
   .5939745E-02   .6051678E-02   .5993362E-02   .5825498E-02   .5665807E-02
   .5609833E-02   .5677771E-02   .5805035E-02   .5929961E-02   .5964033E-02
   .5827845E-02   .5535045E-02   .5145886E-02   .4799114E-02   .4650996E-02
   .4751038E-02   .5012747E-02   .5283334E-02   .5458902E-02   .5509798E-02
   .5486838E-02   .5415622E-02   .5303575E-02   .5191928E-02   .5130088E-02
   .5096247E-02   .5000406E-02   .4786996E-02   .4475783E-02   .4130907E-02
   .3822856E-02   .3626628E-02   .3594930E-02   .3730517E-02   .4016409E-02
   .4358653E-02   .4603805E-02   .4604397E-02   .4319536E-02   .3849530E-02
   .3385857E-02   .3106668E-02   .3068613E-02   .3235920E-02   .3513278E-02
   .3783005E-02   .3971565E-02   .3999410E-02   .3828686E-02   .3528418E-02
   .3208591E-02   .2967845E-02   .2825895E-02   .2785827E-02   .2860913E-02
   .3062705E-02   .3342452E-02   .3600348E-02   .3734113E-02   .3715986E-02
   .3630738E-02   .3584526E-02   .3586810E-02   .3551764E-02   .3409854E-02
   .3160743E-02   .2838389E-02   .2504584E-02   .2214278E-02   .1981084E-02
   .1799589E-02   .1686744E-02   .1615640E-02   .1574085E-02   .1605275E-02
   .1746434E-02   .1972267E-02   .2190197E-02   .2279419E-02   .2184290E-02
   .1946234E-02   .1609595E-02   .1258174E-02   .9738265E-03   .7942315E-03
   .7561437E-03   .8622852E-03   .1056083E-02   .1259451E-02   .1360081E-02
   .1255388E-02   .9282649E-03   .4884614E-03   .1433298E-03   .2128780E-04
   .1445082E-03   .4822340E-03   .9663969E-03   .1440417E-02   .1729046E-02
   .1772037E-02   .1636429E-02   .1421996E-02   .1210343E-02   .1038111E-02
   .9395164E-03   .9718070E-03   .1138896E-02   .1340832E-02   .1440873E-02
   .1374927E-02   .1204505E-02   .1007293E-02   .8245321E-03   .6910232E-03
   .6593816E-03   .6978150E-03   .7155487E-03   .6421494E-03   .4608321E-03
   .2914943E-03   .2889241E-03   .5219231E-03   .9041122E-03   .1240020E-02
   .1374587E-02   .1283538E-02   .1054783E-02   .7764376E-03   .5058795E-03
   .3217307E-03   .3091009E-03   .4681451E-03   .7271551E-03   .9956472E-03
   .1189058E-02   .1260251E-02   .1210063E-02   .1049546E-02   .8087747E-03
   .5612911E-03   .3866790E-03   .3050296E-03   .2705123E-03   .2077286E-03
   .9803299E-04  -.8494331E-04  -.3922016E-03  -.7909846E-03  -.1156315E-02
  -.1368726E-02  -.1417609E-02  -.1377666E-02  -.1288664E-02  -.1132664E-02
  -.8637542E-03  -.5031775E-03  -.1786128E-03  -.9033532E-05  -.2484288E-04
  -.2236241E-03  -.6123068E-03  -.1115125E-02  -.1542268E-02  -.1732891E-02
  -.1641528E-02  -.1361663E-02  -.1058876E-02  -.9222643E-03  -.1079513E-02
  -.1545241E-02  -.2187238E-02  -.2752656E-02  -.3007617E-02  -.2889924E-02
  -.2504481E-02  -.2053721E-02  -.1775629E-02  -.1839504E-02  -.2213308E-02
  -.2688223E-02  -.3046912E-02  -.3137579E-02  -.2885794E-02  -.2349345E-02
  -.1767813E-02  -.1407794E-02  -.1386989E-02  -.1702362E-02  -.2305261E-02
  -.3064122E-02  -.3770013E-02  -.4230355E-02  -.4360425E-02  -.4199672E-02
  -.3857707E-02  -.3484236E-02  -.3208652E-02  -.3138057E-02  -.3308731E-02
  -.3669872E-02  -.4082159E-02  -.4382829E-02  -.4462326E-02  -.4288291E-02
  -.3977922E-02  -.3754853E-02  -.3776420E-02  -.4042071E-02  -.4423484E-02
  -.4735201E-02  -.4819833E-02  -.4634626E-02  -.4279663E-02  -.3942850E-02
  -.3795274E-02  -.3923632E-02  -.4286149E-02  -.4788301E-02  -.5323390E-02
  -.5771688E-02  -.6011637E-02  -.5974224E-02  -.5733440E-02  -.5428381E-02
  -.5197048E-02  -.5156177E-02  -.5339944E-02  -.5708025E-02  -.6110258E-02
  -.6375026E-02  -.6454254E-02  -.6375298E-02  -.6157076E-02  -.5873454E-02
  -.5637290E-02  -.5488562E-02  -.5376353E-02  -.5219326E-02  -.5003609E-02
  -.4775569E-02  -.4592364E-02  -.4550570E-02  -.4718100E-02  -.5067034E-02
  -.5543889E-02  -.6063687E-02  -.6496963E-02  -.6746708E-02  -.6815539E-02
  -.6753798E-02  -.6623274E-02  -.6490989E-02  -.6408537E-02  -.6429319E-02
  -.6567079E-02  -.6781686E-02  -.7008809E-02  -.7174494E-02  -.7261602E-02
  -.7309611E-02  -.7361176E-02  -.7414168E-02  -.7461100E-02  -.7490030E-02
  -.7487825E-02  -.7461372E-02  -.7440733E-02  -.7479768E-02  -.7599440E-02
  -.7791061E-02  -.8019690E-02  -.8275718E-02  -.8549678E-02  -.8779723E-02
  -.8929157E-02  -.9006352E-02  -.9037647E-02  -.9034809E-02  -.8994023E-02
  -.8925641E-02  -.8834542E-02  -.8716159E-02  -.8561787E-02  -.8420377E-02
  -.8336352E-02  -.8343370E-02  -.8430952E-02  -.8511958E-02  -.8521477E-02
  -.8475844E-02  -.8414520E-02  -.8330610E-02  -.8240127E-02  -.8167867E-02
  -.8170141E-02  -.8309523E-02  -.8603686E-02  -.9000671E-02  -.9394809E-02
  -.9665724E-02  -.9713762E-02  -.9521289E-02  -.9145037E-02  -.8682999E-02
  -.8275353E-02  -.8103708E-02  -.8248047E-02  -.8619869E-02  -.9050209E-02
  -.9360278E-02  -.9422089E-02  -.9223866E-02  -.8846922E-02  -.8436815E-02
  -.8158126E-02  -.8089650E-02  -.8190591E-02  -.8343914E-02  -.8436069E-02
  -.8398386E-02  -.8235785E-02  -.8033299E-02  -.7903335E-02  -.7898940E-02
  -.7962949E-02  -.8036053E-02  -.8117457E-02  -.8187451E-02  -.8216268E-02
  -.8190045E-02  -.8131231E-02  -.8082821E-02  -.8077838E-02  -.8140422E-02
  -.8297796E-02  -.8527168E-02  -.8748965E-02  -.8888651E-02  -.8906287E-02
  -.8811376E-02  -.8634567E-02  -.8429920E-02  -.8219574E-02  -.8052590E-02
  -.8024307E-02  -.8186823E-02  -.8453059E-02  -.8669309E-02  -.8734468E-02
  -.8666872E-02  -.8538091E-02  -.8397387E-02  -.8305261E-02  -.8335557E-02
  -.8483296E-02  -.8690442E-02  -.8865437E-02  -.8897665E-02  -.8770021E-02
  -.8567039E-02  -.8349879E-02  -.8097686E-02  -.7827920E-02  -.7601026E-02
  -.7463221E-02  -.7419320E-02  -.7482016E-02  -.7598606E-02  -.7685091E-02
  -.7689181E-02  -.7605034E-02  -.7449487E-02  -.7245915E-02  -.7024998E-02
  -.6818202E-02  -.6690358E-02  -.6739346E-02  -.7021379E-02  -.7469499E-02
  -.7955954E-02  -.8311419E-02  -.8375827E-02  -.8126496E-02  -.7675469E-02
  -.7222081E-02  -.6986517E-02  -.7072772E-02  -.7396025E-02  -.7749890E-02
  -.7917249E-02  -.7817036E-02  -.7530614E-02  -.7169574E-02  -.6822682E-02
  -.6611045E-02  -.6648554E-02  -.6921776E-02  -.7311515E-02  -.7634142E-02
  -.7754736E-02  -.7646416E-02  -.7391813E-02  -.7120061E-02  -.6965368E-02
  -.7018228E-02  -.7287772E-02  -.7644607E-02  -.7907125E-02  -.7958511E-02
  -.7772984E-02  -.7433186E-02  -.7091904E-02  -.6912080E-02  -.6951452E-02
  -.7119842E-02  -.7304814E-02  -.7413445E-02  -.7347800E-02  -.7075325E-02
  -.6633309E-02  -.6093918E-02  -.5556070E-02  -.5112687E-02  -.4852873E-02
  -.4839321E-02  -.5045245E-02  -.5357641E-02  -.5630677E-02  -.5733534E-02
  -.5658912E-02  -.5480343E-02  -.5302716E-02  -.5241146E-02  -.5388521E-02
  -.5755247E-02  -.6249437E-02  -.6759372E-02  -.7166165E-02  -.7346790E-02
  -.7248542E-02  -.6964130E-02  -.6689056E-02  -.6584015E-02  -.6659510E-02
  -.6851916E-02  -.7040743E-02  -.7097594E-02  -.6944455E-02  -.6592676E-02
  -.6121938E-02  -.5658637E-02  -.5350728E-02  -.5258648E-02  -.5341690E-02
  -.5507761E-02  -.5656962E-02  -.5716895E-02  -.5677290E-02  -.5601364E-02
  -.5577530E-02  -.5689984E-02  -.6011666E-02  -.6522832E-02  -.7072822E-02
  -.7540018E-02  -.7932868E-02  -.8217186E-02  -.8287871E-02  -.8103978E-02
  -.7694868E-02  -.7204036E-02  -.6774424E-02  -.6493573E-02  -.6369019E-02
  -.6341860E-02  -.6369744E-02  -.6411509E-02  -.6381399E-02  -.6205474E-02
  -.5951370E-02  -.5773510E-02  -.5751300E-02  -.5874105E-02  -.6125199E-02
  -.6435919E-02  -.6668609E-02  -.6765656E-02  -.6770967E-02  -.6714724E-02
  -.6617661E-02  -.6530328E-02  -.6494341E-02  -.6470874E-02  -.6372840E-02
  -.6171541E-02  -.5904089E-02  -.5631154E-02  -.5409986E-02  -.5207144E-02
  -.4972362E-02  -.4752682E-02  -.4620510E-02  -.4588108E-02  -.4599668E-02
  -.4644172E-02  -.4738115E-02  -.4804555E-02  -.4739638E-02  -.4556110E-02
  -.4359276E-02  -.4249889E-02  -.4262967E-02  -.4355156E-02  -.4495438E-02
  -.4680757E-02  -.4867140E-02  -.4964132E-02  -.4950530E-02  -.4856905E-02
  -.4688801E-02  -.4425146E-02  -.4095637E-02  -.3754525E-02  -.3422423E-02
  -.3162368E-02  -.3090473E-02  -.3246802E-02  -.3557170E-02  -.3902641E-02
  -.4191209E-02  -.4333952E-02  -.4242793E-02  -.3892341E-02  -.3379212E-02
  -.2899303E-02  -.2630467E-02  -.2646623E-02  -.2919169E-02  -.3331560E-02
  -.3732047E-02  -.4031363E-02  -.4180412E-02  -.4105108E-02  -.3775047E-02
  -.3356518E-02  -.3041559E-02  -.2890190E-02  -.2878921E-02  -.2967740E-02
  -.3102509E-02  -.3216208E-02  -.3215351E-02  -.3011838E-02  -.2610400E-02
  -.2118197E-02  -.1707133E-02  -.1488986E-02  -.1486463E-02  -.1690978E-02
  -.2045082E-02  -.2399852E-02  -.2591155E-02  -.2590534E-02  -.2491824E-02
  -.2389453E-02  -.2312934E-02  -.2249630E-02  -.2194432E-02  -.2136721E-02
  -.2048983E-02  -.1917220E-02  -.1744743E-02  -.1557337E-02  -.1420684E-02
  -.1368486E-02  -.1355827E-02  -.1329068E-02  -.1243960E-02  -.1055775E-02
  -.7766273E-03  -.4596982E-03  -.1444347E-03   .1301836E-03   .3104103E-03
   .4072026E-03   .4459885E-03   .4068249E-03   .2211585E-03  -.1031448E-03
  -.4629995E-03  -.7704302E-03  -.9841390E-03  -.1114930E-02  -.1169785E-02
  -.1154132E-02  -.1046570E-02  -.8897570E-03  -.7551398E-03  -.6636819E-03
  -.5982286E-03  -.5256773E-03  -.4214631E-03  -.3340117E-03  -.3345714E-03
  -.4358927E-03  -.5727553E-03  -.6792153E-03  -.7088366E-03  -.5881420E-03
  -.2859787E-03   .1357359E-03   .5376827E-03   .7637891E-03   .7434616E-03
   .5117995E-03   .1915213E-03  -.7320573E-04  -.1331741E-03   .1100796E-03
   .6121461E-03   .1172390E-02   .1584838E-02   .1734826E-02   .1610769E-02
   .1274802E-02   .8227292E-03   .3791419E-03   .8033350E-04   .5512849E-04
   .3185743E-03   .7370052E-03   .1121037E-02   .1307383E-02   .1255835E-02
   .1050198E-02   .8145409E-03   .6620805E-03   .7027767E-03   .9430579E-03
   .1285836E-02   .1655399E-02   .1979178E-02   .2172635E-02   .2246587E-02
   .2277263E-02   .2294370E-02   .2304190E-02   .2292803E-02   .2216225E-02
   .2014760E-02   .1702274E-02   .1391035E-02   .1211412E-02   .1218636E-02
   .1434763E-02   .1789062E-02   .2154035E-02   .2423185E-02   .2554005E-02
   .2538528E-02   .2432861E-02   .2347206E-02   .2356395E-02   .2474122E-02
   .2660329E-02   .2860839E-02   .3040496E-02   .3159978E-02   .3169769E-02
   .3089238E-02   .3006593E-02   .2976776E-02   .2962253E-02   .2889071E-02
   .2767794E-02   .2675870E-02   .2639656E-02   .2644020E-02   .2713890E-02
   .2883364E-02   .3141805E-02   .3469564E-02   .3824460E-02   .4146454E-02
   .4363035E-02   .4405700E-02   .4285707E-02   .4056826E-02   .3752144E-02
   .3457623E-02   .3269325E-02   .3242151E-02   .3410163E-02   .3725194E-02
   .4074393E-02   .4349014E-02   .4437609E-02   .4274558E-02   .3908138E-02
   .3486003E-02   .3129040E-02   .2868709E-02   .2710097E-02   .2660648E-02
   .2742374E-02   .2985394E-02   .3386786E-02   .3876352E-02   .4325333E-02
   .4584316E-02   .4575812E-02   .4371313E-02   .4136300E-02   .4041347E-02
   .4142121E-02   .4369445E-02   .4657144E-02   .4917450E-02   .5057255E-02
   .5018553E-02   .4779404E-02   .4427897E-02   .4109338E-02   .3916170E-02
   .3822007E-02   .3745322E-02   .3670805E-02   .3624698E-02   .3607997E-02
   .3637071E-02   .3746763E-02   .3951063E-02   .4229950E-02   .4496237E-02
   .4681097E-02   .4772780E-02   .4768094E-02   .4666630E-02   .4520136E-02
   .4373308E-02   .4190043E-02   .3945663E-02   .3683435E-02   .3462782E-02
   .3360397E-02   .3392366E-02   .3530110E-02   .3718692E-02   .3866909E-02
   .3894276E-02   .3795178E-02   .3676745E-02   .3629954E-02   .3706808E-02
   .3939324E-02   .4260965E-02   .4589057E-02   .4863354E-02   .5094925E-02
   .5289199E-02   .5388725E-02   .5346064E-02   .5176414E-02   .4931316E-02
   .4652362E-02   .4394711E-02   .4224485E-02   .4167208E-02   .4209231E-02
   .4368982E-02   .4675608E-02   .5090682E-02   .5513360E-02   .5863080E-02
   .6103652E-02   .6185997E-02   .6106972E-02   .5908416E-02   .5628613E-02
   .5319914E-02   .5089074E-02   .5039272E-02   .5170890E-02   .5401291E-02
   .5645290E-02   .5841993E-02   .5953975E-02   .6006894E-02   .6021111E-02
   .6033943E-02   .6057092E-02   .6099433E-02   .6185173E-02   .6269383E-02
   .6277628E-02   .6193728E-02   .6036613E-02   .5830002E-02   .5643148E-02
   .5548800E-02   .5564910E-02   .5672493E-02   .5835701E-02   .6003538E-02
   .6103159E-02   .6087337E-02   .5972695E-02   .5815889E-02   .5659854E-02
   .5507469E-02   .5366882E-02   .5242509E-02   .5116144E-02   .4971798E-02
   .4845623E-02   .4771027E-02   .4748067E-02   .4793960E-02   .4946249E-02
   .5165648E-02   .5343201E-02   .5438890E-02   .5499940E-02   .5566946E-02
   .5658470E-02   .5802661E-02   .6009448E-02   .6238883E-02   .6405824E-02
   .6444737E-02   .6341738E-02   .6136249E-02   .5898311E-02   .5728758E-02
   .5687448E-02   .5727755E-02   .5766067E-02   .5735883E-02   .5627687E-02
   .5458880E-02   .5289972E-02   .5192153E-02   .5183176E-02   .5252978E-02
   .5365170E-02   .5511537E-02   .5691475E-02   .5839401E-02   .5911169E-02
   .5900348E-02   .5813200E-02   .5710604E-02   .5706925E-02   .5819643E-02
   .5970615E-02   .6057356E-02   .6022338E-02   .5908504E-02   .5735085E-02
   .5461412E-02   .5130659E-02   .4829744E-02   .4592353E-02   .4461184E-02
   .4485419E-02   .4593725E-02   .4699622E-02   .4772816E-02   .4798657E-02
   .4757408E-02   .4618335E-02   .4397376E-02   .4141465E-02   .3893972E-02
   .3704206E-02   .3594029E-02   .3576590E-02   .3649137E-02   .3808527E-02
   .3997283E-02   .4115760E-02   .4135184E-02   .4071358E-02   .3961635E-02
   .3878097E-02   .3845438E-02   .3831452E-02   .3800269E-02   .3755465E-02
   .3716420E-02   .3659196E-02   .3561361E-02   .3463255E-02   .3425915E-02
   .3488225E-02   .3624717E-02   .3765977E-02   .3860979E-02   .3905310E-02
   .3915614E-02   .3909842E-02   .3923007E-02   .4005904E-02   .4180059E-02
   .4383737E-02   .4490029E-02   .4423868E-02   .4222426E-02   .4012348E-02
   .3897975E-02   .3918521E-02   .4065960E-02   .4272819E-02   .4444413E-02
   .4517380E-02   .4492655E-02   .4385971E-02   .4246429E-02   .4204879E-02
   .4348559E-02   .4595872E-02   .4803411E-02   .4821679E-02   .4601933E-02
   .4255588E-02   .3928684E-02   .3734760E-02   .3692886E-02   .3749877E-02
   .3877816E-02   .4052753E-02   .4221380E-02   .4347664E-02   .4445948E-02
   .4557305E-02   .4688894E-02   .4811829E-02   .4896813E-02   .4932576E-02
   .4889496E-02   .4729344E-02   .4481537E-02   .4258142E-02   .4142366E-02
   .4139434E-02   .4219689E-02   .4336206E-02   .4391855E-02   .4328265E-02
   .4170207E-02   .3979168E-02   .3783003E-02   .3607562E-02   .3513482E-02
   .3511790E-02   .3572679E-02   .3719867E-02   .3979258E-02   .4273186E-02
   .4499786E-02   .4626164E-02   .4659244E-02   .4593634E-02   .4422104E-02
   .4181952E-02   .3939365E-02   .3765021E-02   .3663484E-02   .3633160E-02
   .3671565E-02   .3740265E-02   .3802060E-02   .3835808E-02   .3813401E-02
   .3753163E-02   .3718494E-02   .3733033E-02   .3789144E-02   .3860732E-02
   .3921714E-02   .3959266E-02   .3956433E-02   .3919996E-02   .3885392E-02
   .3883479E-02   .3895084E-02   .3862902E-02   .3794678E-02   .3751251E-02
   .3750089E-02   .3795363E-02   .3856323E-02   .3882466E-02   .3861977E-02
   .3809939E-02   .3765809E-02   .3771126E-02   .3803798E-02   .3842444E-02
   .3882956E-02   .3893319E-02   .3868526E-02   .3837203E-02   .3782726E-02
   .3697395E-02   .3602313E-02   .3556697E-02   .3635441E-02   .3824455E-02
   .4039466E-02   .4204082E-02   .4234379E-02   .4059290E-02   .3694642E-02
   .3236473E-02   .2773710E-02   .2421134E-02   .2234315E-02   .2197583E-02
   .2282374E-02   .2442431E-02   .2667911E-02   .2933992E-02   .3181513E-02
   .3377151E-02   .3488804E-02   .3510262E-02   .3487852E-02   .3438389E-02
   .3363611E-02   .3294663E-02   .3263512E-02   .3272286E-02   .3267406E-02
   .3182993E-02   .3037776E-02   .2893402E-02   .2790661E-02   .2736967E-02
   .2704965E-02   .2670180E-02   .2631943E-02   .2629835E-02   .2679353E-02
   .2724222E-02   .2700509E-02   .2639803E-02   .2603034E-02   .2578893E-02
   .2498990E-02   .2279443E-02   .1908837E-02   .1499283E-02   .1211875E-02
   .1133154E-02   .1234255E-02   .1459386E-02   .1793163E-02   .2202799E-02
   .2555841E-02   .2726597E-02   .2672364E-02   .2475330E-02   .2284175E-02
   .2210165E-02   .2287343E-02   .2501242E-02   .2766017E-02   .2956585E-02
   .2971500E-02   .2786462E-02   .2494488E-02   .2208634E-02   .2026247E-02
   .1986040E-02   .2073182E-02   .2243995E-02   .2449915E-02   .2623230E-02
   .2698257E-02   .2696614E-02   .2667285E-02   .2679718E-02   .2776512E-02
   .2924552E-02   .3046596E-02   .3121177E-02   .3141329E-02   .3075895E-02
   .2920052E-02   .2709566E-02   .2512049E-02   .2415172E-02   .2417734E-02
   .2460381E-02   .2513127E-02   .2536136E-02   .2487239E-02   .2341942E-02
   .2150399E-02   .2030304E-02   .2085750E-02   .2312094E-02   .2639962E-02
   .3001031E-02   .3282676E-02   .3377759E-02   .3296387E-02   .3126843E-02
   .2979479E-02   .2954209E-02   .3096691E-02   .3372121E-02   .3676420E-02
   .3936792E-02   .4071234E-02   .3999465E-02   .3722825E-02   .3345319E-02
   .3008245E-02   .2810999E-02   .2784002E-02   .2921939E-02   .3198618E-02
   .3479628E-02   .3591734E-02   .3473901E-02   .3189408E-02   .2850499E-02
   .2572548E-02   .2462133E-02   .2575158E-02   .2842300E-02   .3121549E-02
   .3285398E-02   .3266815E-02   .3082558E-02   .2823098E-02   .2571189E-02
   .2374137E-02   .2257079E-02   .2222360E-02   .2229343E-02   .2254208E-02
   .2289247E-02   .2337065E-02   .2373092E-02   .2346492E-02   .2275967E-02
   .2239047E-02   .2270920E-02   .2343841E-02   .2422522E-02   .2469261E-02
   .2447230E-02   .2360586E-02   .2280363E-02   .2275991E-02   .2390515E-02
   .2583366E-02   .2766941E-02   .2883938E-02   .2916406E-02   .2829639E-02
   .2608617E-02   .2298373E-02   .1964490E-02   .1672041E-02   .1474151E-02
   .1370321E-02   .1341958E-02   .1369229E-02   .1409873E-02   .1438950E-02
   .1450167E-02   .1441354E-02   .1415387E-02   .1414631E-02   .1465127E-02
   .1525021E-02   .1515569E-02   .1468619E-02   .1470516E-02   .1529751E-02
   .1588245E-02   .1614312E-02   .1615356E-02   .1608243E-02   .1628535E-02
   .1720624E-02   .1833675E-02   .1869992E-02   .1813224E-02   .1693039E-02
   .1578794E-02   .1590589E-02   .1777728E-02   .2064987E-02   .2322470E-02
   .2493346E-02   .2554536E-02   .2492414E-02   .2349902E-02   .2203875E-02
   .2096594E-02   .2051998E-02   .2074852E-02   .2130840E-02   .2171717E-02
   .2187351E-02   .2178091E-02   .2103169E-02   .1931362E-02   .1671551E-02
   .1385305E-02   .1178922E-02   .1122074E-02   .1184425E-02   .1301576E-02
   .1437784E-02   .1516073E-02   .1492410E-02   .1375533E-02   .1154447E-02
   .8612409E-03   .5896416E-03   .4346447E-03   .4503025E-03   .5946751E-03
   .7734321E-03   .9011045E-03   .9426348E-03   .9098226E-03   .8008988E-03
   .6452824E-03   .4858708E-03   .3577032E-03   .2657945E-03   .1720934E-03
   .6247767E-04  -.8709132E-04  -.2609728E-03  -.4227194E-03  -.5385421E-03
  -.5687217E-03  -.4976874E-03  -.3538670E-03  -.2119633E-03  -.1256090E-03
  -.8753007E-04  -.7324252E-04  -.8228556E-04  -.1520833E-03  -.2965233E-03
  -.4930762E-03  -.6903963E-03  -.8230802E-03  -.8263117E-03  -.7519467E-03
  -.6705692E-03  -.6210009E-03  -.6490763E-03  -.7477404E-03  -.8418072E-03
  -.9141334E-03  -.9922733E-03  -.1064250E-02  -.1074827E-02  -.9939756E-03
  -.8249413E-03  -.6325635E-03  -.4766325E-03  -.3836675E-03  -.3888573E-03
  -.4995265E-03  -.6925027E-03  -.9090606E-03  -.1072352E-02  -.1151274E-02
  -.1173009E-02  -.1187089E-02  -.1222597E-02  -.1310314E-02  -.1466442E-02
  -.1663702E-02  -.1856497E-02  -.1985134E-02  -.1999227E-02  -.1935403E-02
  -.1884955E-02  -.1896759E-02  -.1949812E-02  -.2008552E-02  -.2016277E-02
  -.1928328E-02  -.1739790E-02  -.1474508E-02  -.1190640E-02  -.9559404E-03
  -.8179564E-03  -.7924501E-03  -.9015918E-03  -.1142642E-02  -.1447591E-02
  -.1752543E-02  -.2034208E-02  -.2260590E-02  -.2394836E-02  -.2383182E-02
  -.2212803E-02  -.1964891E-02  -.1746631E-02  -.1636033E-02  -.1643240E-02
  -.1698840E-02  -.1735361E-02  -.1738868E-02  -.1697486E-02  -.1639938E-02
  -.1613273E-02  -.1662715E-02  -.1811741E-02  -.2082872E-02  -.2400994E-02
  -.2624547E-02  -.2703974E-02  -.2630061E-02  -.2423005E-02  -.2146860E-02
  -.1863934E-02  -.1645894E-02  -.1556610E-02  -.1569156E-02  -.1631039E-02
  -.1696556E-02  -.1713406E-02  -.1709998E-02  -.1740984E-02  -.1800406E-02
  -.1868045E-02  -.1931068E-02  -.2003998E-02  -.2058770E-02  -.2054845E-02
  -.2019265E-02  -.1963769E-02  -.1861632E-02  -.1739824E-02  -.1696082E-02
  -.1817852E-02  -.2073584E-02  -.2390028E-02  -.2729400E-02  -.3061389E-02
  -.3349025E-02  -.3567784E-02  -.3703714E-02  -.3723001E-02  -.3608947E-02
  -.3367369E-02  -.3057345E-02  -.2775199E-02  -.2618976E-02  -.2641073E-02
  -.2810651E-02  -.3024229E-02  -.3199448E-02  -.3298911E-02  -.3290259E-02
  -.3177464E-02  -.3004228E-02  -.2836924E-02  -.2746560E-02  -.2777190E-02
  -.2918192E-02  -.3098423E-02  -.3202384E-02  -.3165724E-02  -.3010658E-02
  -.2847630E-02  -.2764838E-02  -.2786224E-02  -.2943354E-02  -.3254058E-02
  -.3665123E-02  -.4092404E-02  -.4409431E-02  -.4501446E-02  -.4353181E-02
  -.4055748E-02  -.3766705E-02  -.3640252E-02  -.3745615E-02  -.4045990E-02
  -.4436772E-02  -.4772693E-02  -.4959305E-02  -.4997952E-02  -.4940345E-02
  -.4838067E-02  -.4764007E-02  -.4803755E-02  -.4948109E-02  -.5141715E-02
  -.5312642E-02  -.5410408E-02  -.5390739E-02  -.5214040E-02  -.4923953E-02
  -.4616394E-02  -.4352645E-02  -.4169102E-02  -.4112757E-02  -.4184080E-02
  -.4370623E-02  -.4651173E-02  -.4955505E-02  -.5248255E-02  -.5491591E-02
  -.5637762E-02  -.5662447E-02  -.5583685E-02  -.5437804E-02  -.5267809E-02
  -.5117396E-02  -.5031431E-02  -.5050441E-02  -.5166916E-02  -.5305892E-02
  -.5411897E-02  -.5484399E-02  -.5503427E-02  -.5428656E-02  -.5245647E-02
  -.5010746E-02  -.4826192E-02  -.4756670E-02  -.4798533E-02  -.4888781E-02
  -.4955620E-02  -.4950016E-02  -.4854920E-02  -.4694641E-02  -.4524695E-02
  -.4367701E-02  -.4261969E-02  -.4232311E-02  -.4251215E-02  -.4299241E-02
  -.4366303E-02  -.4453169E-02  -.4578883E-02  -.4758061E-02  -.4956725E-02
  -.5096042E-02  -.5108441E-02  -.4986622E-02  -.4798964E-02  -.4631959E-02
  -.4546787E-02  -.4577326E-02  -.4727506E-02  -.4950812E-02  -.5151751E-02
  -.5263169E-02  -.5280052E-02  -.5197868E-02  -.5056948E-02  -.4886076E-02
  -.4706121E-02  -.4600619E-02  -.4617830E-02  -.4754215E-02  -.4921521E-02
  -.5007705E-02  -.4986019E-02  -.4898896E-02  -.4827372E-02  -.4825152E-02
  -.4928492E-02  -.5150577E-02  -.5441445E-02  -.5703575E-02  -.5860219E-02
  -.5876263E-02  -.5750570E-02  -.5518604E-02  -.5246854E-02  -.5017795E-02
  -.4889482E-02  -.4890182E-02  -.5008049E-02  -.5184360E-02  -.5341909E-02
  -.5434411E-02  -.5461139E-02  -.5427004E-02  -.5374376E-02  -.5350308E-02
  -.5367400E-02  -.5407025E-02  -.5438970E-02  -.5471922E-02  -.5517448E-02
  -.5546674E-02  -.5517645E-02  -.5408358E-02  -.5217352E-02  -.4985845E-02
  -.4779684E-02  -.4637242E-02  -.4584230E-02  -.4641340E-02  -.4810228E-02
  -.5022012E-02  -.5200331E-02  -.5318195E-02  -.5363354E-02  -.5335566E-02
  -.5270427E-02  -.5204193E-02  -.5163314E-02  -.5178853E-02  -.5237892E-02
  -.5290168E-02  -.5324471E-02  -.5352214E-02  -.5386171E-02  -.5399108E-02
  -.5354035E-02  -.5269407E-02  -.5210227E-02  -.5212153E-02  -.5294500E-02
  -.5475064E-02  -.5701210E-02  -.5892116E-02  -.6025417E-02  -.6072011E-02
  -.6019854E-02  -.5899297E-02  -.5780977E-02  -.5689546E-02  -.5621779E-02
  -.5566584E-02  -.5536735E-02  -.5533296E-02  -.5556072E-02  -.5593679E-02
  -.5575972E-02  -.5439325E-02  -.5180157E-02  -.4869858E-02  -.4599078E-02
  -.4421263E-02  -.4364903E-02  -.4439984E-02  -.4602362E-02  -.4770304E-02
  -.4882069E-02  -.4909582E-02  -.4879901E-02  -.4804292E-02  -.4663953E-02
  -.4522835E-02  -.4444723E-02  -.4429205E-02  -.4467968E-02  -.4549961E-02
  -.4638144E-02  -.4692009E-02  -.4685839E-02  -.4627338E-02  -.4517258E-02
  -.4361654E-02  -.4173412E-02  -.3961926E-02  -.3785910E-02  -.3743139E-02
  -.3864160E-02  -.4046440E-02  -.4160666E-02  -.4100696E-02  -.3829192E-02
  -.3441152E-02  -.3130933E-02  -.3026410E-02  -.3115910E-02  -.3308041E-02
  -.3511181E-02  -.3636364E-02  -.3630752E-02  -.3519348E-02  -.3390162E-02
  -.3323676E-02  -.3297170E-02  -.3263238E-02  -.3226966E-02  -.3211884E-02
  -.3183166E-02  -.3083904E-02  -.2898552E-02  -.2680931E-02  -.2489956E-02
  -.2359861E-02  -.2293620E-02  -.2246095E-02  -.2185279E-02  -.2117502E-02
  -.2095636E-02  -.2112710E-02  -.2133238E-02  -.2115966E-02  -.2036638E-02
  -.1896844E-02  -.1711305E-02  -.1516108E-02  -.1368995E-02  -.1335434E-02
  -.1443374E-02  -.1640590E-02  -.1856961E-02  -.2013365E-02  -.2058933E-02
  -.1959812E-02  -.1723297E-02  -.1456806E-02  -.1285730E-02  -.1294535E-02
  -.1444124E-02  -.1661418E-02  -.1893875E-02  -.2059355E-02  -.2080102E-02
  -.1965487E-02  -.1768029E-02  -.1598557E-02  -.1573422E-02  -.1709774E-02
  -.1933320E-02  -.2131301E-02  -.2207562E-02  -.2099765E-02  -.1824125E-02
  -.1508762E-02  -.1249015E-02  -.1080393E-02  -.1021928E-02  -.1079356E-02
  -.1201624E-02  -.1316851E-02  -.1376809E-02  -.1374106E-02  -.1330592E-02
  -.1290547E-02  -.1315532E-02  -.1431627E-02  -.1593474E-02  -.1730782E-02
  -.1789540E-02  -.1726876E-02  -.1523942E-02  -.1275579E-02  -.1108767E-02
  -.1082666E-02  -.1149556E-02  -.1240244E-02  -.1332672E-02  -.1405172E-02
  -.1405708E-02  -.1330125E-02  -.1240334E-02  -.1167225E-02  -.1116383E-02
  -.1094413E-02  -.1113938E-02  -.1174535E-02  -.1225549E-02  -.1240869E-02
  -.1225398E-02  -.1159695E-02  -.1076352E-02  -.1060128E-02  -.1139644E-02
  -.1291511E-02  -.1433389E-02  -.1468848E-02  -.1415130E-02  -.1326613E-02
  -.1241886E-02  -.1234675E-02  -.1309492E-02  -.1452707E-02  -.1651255E-02
  -.1866062E-02  -.2027650E-02  -.2081758E-02  -.2036967E-02  -.1950536E-02
  -.1878648E-02  -.1829729E-02  -.1839707E-02  -.1928609E-02  -.2054101E-02
  -.2195107E-02  -.2339311E-02  -.2431538E-02  -.2389959E-02  -.2227580E-02
  -.2024156E-02  -.1877983E-02  -.1857480E-02  -.1963806E-02  -.2137420E-02
  -.2269877E-02  -.2245688E-02  -.2029435E-02  -.1710528E-02  -.1411451E-02
  -.1204889E-02  -.1113035E-02  -.1164360E-02  -.1339442E-02  -.1549300E-02
  -.1690845E-02  -.1704953E-02  -.1604940E-02  -.1450121E-02  -.1271868E-02
  -.1062981E-02  -.8869574E-03  -.8346820E-03  -.9227357E-03  -.1097121E-02
  -.1240381E-02  -.1249185E-02  -.1111578E-02  -.9320839E-03  -.7977795E-03
  -.7379714E-03  -.7274365E-03  -.7467160E-03  -.8117920E-03  -.8782777E-03
  -.8962354E-03  -.8872131E-03  -.8887075E-03  -.9238822E-03  -.1012214E-02
  -.1118728E-02  -.1154953E-02  -.1056907E-02  -.8254529E-03  -.4965204E-03
  -.1761040E-03  -.2620640E-05  -.2833759E-04  -.2023871E-03  -.4372568E-03
  -.6178665E-03  -.6724214E-03  -.5784256E-03  -.3680203E-03  -.9747101E-04
   .1769135E-03   .3902776E-03   .5111248E-03   .5620106E-03   .5956943E-03
   .6829907E-03   .8239262E-03   .9620424E-03   .1055912E-02   .1093374E-02
   .1092730E-02   .1086641E-02   .1099557E-02   .1115960E-02   .1120565E-02
   .1094582E-02   .1047587E-02   .1034406E-02   .1138212E-02   .1363796E-02
   .1644429E-02   .1884399E-02   .1971118E-02   .1887134E-02   .1735608E-02
   .1606163E-02   .1510492E-02   .1459993E-02   .1498100E-02   .1612573E-02
   .1727865E-02   .1738603E-02   .1626002E-02   .1506692E-02   .1492985E-02
   .1556992E-02   .1631640E-02   .1703976E-02   .1790716E-02   .1834742E-02
   .1757958E-02   .1587687E-02   .1424090E-02   .1359994E-02   .1416481E-02
   .1565349E-02   .1727691E-02   .1828828E-02   .1855511E-02   .1834218E-02
   .1785013E-02   .1732210E-02   .1643836E-02   .1478055E-02   .1257058E-02
   .1074623E-02   .1026958E-02   .1137944E-02   .1360621E-02   .1621935E-02
   .1868594E-02   .2050405E-02   .2126585E-02   .2132823E-02   .2102389E-02
   .2047608E-02   .2019840E-02   .2062712E-02   .2145591E-02   .2227847E-02
   .2298810E-02   .2349133E-02   .2330610E-02   .2196148E-02   .1997816E-02
   .1847314E-02   .1823276E-02   .1926315E-02   .2070849E-02   .2171975E-02
   .2216805E-02   .2236371E-02   .2277122E-02   .2358212E-02   .2468077E-02
   .2551864E-02   .2594385E-02   .2622411E-02   .2671875E-02   .2739877E-02
   .2783266E-02   .2830899E-02   .2938931E-02   .3076849E-02   .3174522E-02
   .3190975E-02   .3108392E-02   .2952742E-02   .2775537E-02   .2643255E-02
   .2624636E-02   .2732806E-02   .2944127E-02   .3204391E-02   .3435579E-02
   .3577453E-02   .3626737E-02   .3610916E-02   .3560067E-02   .3470883E-02
   .3361464E-02   .3313250E-02   .3396340E-02   .3558930E-02   .3696305E-02
   .3759367E-02   .3781511E-02   .3787185E-02   .3771197E-02   .3726370E-02
   .3670659E-02   .3678927E-02   .3778917E-02   .3908273E-02   .3999223E-02
   .4004072E-02   .3943435E-02   .3893549E-02   .3918416E-02   .4031783E-02
   .4221082E-02   .4422285E-02   .4550552E-02   .4571287E-02   .4497938E-02
   .4380999E-02   .4271088E-02   .4253942E-02   .4422055E-02   .4726123E-02
   .5035537E-02   .5201428E-02   .5154806E-02   .4940343E-02   .4604802E-02
   .4235274E-02   .3935939E-02   .3755899E-02   .3746330E-02   .3889453E-02
   .4042505E-02   .4088145E-02   .4019150E-02   .3876773E-02   .3718399E-02
   .3618795E-02   .3639337E-02   .3789686E-02   .4010081E-02   .4224220E-02
   .4350246E-02   .4340074E-02   .4196674E-02   .3952216E-02   .3680348E-02
   .3454138E-02   .3320783E-02   .3315896E-02   .3436194E-02   .3621615E-02
   .3789279E-02   .3884912E-02   .3908954E-02   .3896151E-02   .3841293E-02
   .3756501E-02   .3668118E-02   .3565714E-02   .3463883E-02   .3397385E-02
   .3405910E-02   .3491721E-02   .3605432E-02   .3718052E-02   .3811419E-02
   .3842535E-02   .3756814E-02   .3600902E-02   .3508403E-02   .3559013E-02
   .3742965E-02   .3999241E-02   .4211670E-02   .4244395E-02   .4075068E-02
   .3799235E-02   .3512256E-02   .3247630E-02   .3050832E-02   .2984259E-02
   .3058530E-02   .3239809E-02   .3467802E-02   .3673605E-02   .3840661E-02
   .3961511E-02   .4019468E-02   .4057446E-02   .4132869E-02   .4210093E-02
   .4230425E-02   .4145666E-02   .3929531E-02   .3631410E-02   .3339936E-02
   .3122812E-02   .2995588E-02   .2984924E-02   .3122241E-02   .3345075E-02
   .3560271E-02   .3696602E-02   .3715376E-02   .3634804E-02   .3491735E-02
   .3324044E-02   .3159775E-02   .3050177E-02   .3049240E-02   .3124578E-02
   .3177417E-02   .3172228E-02   .3135453E-02   .3120879E-02   .3165115E-02
   .3233858E-02   .3276800E-02   .3264451E-02   .3196653E-02   .3084865E-02
   .2930706E-02   .2745394E-02   .2574987E-02   .2504092E-02   .2591722E-02
   .2778411E-02   .2948449E-02   .3034401E-02   .3025709E-02   .2947371E-02
   .2813789E-02   .2641678E-02   .2480453E-02   .2370455E-02   .2351590E-02
   .2432859E-02   .2566884E-02   .2695721E-02   .2780973E-02   .2809714E-02
   .2801304E-02   .2804005E-02   .2871281E-02   .3037877E-02   .3234680E-02
   .3305484E-02   .3160814E-02   .2855639E-02   .2521259E-02   .2250510E-02
   .2092310E-02   .2080575E-02   .2212182E-02   .2444860E-02   .2703919E-02
   .2948667E-02   .3159623E-02   .3287309E-02   .3258305E-02   .3074899E-02
   .2873489E-02   .2771264E-02   .2778832E-02   .2841358E-02   .2908120E-02
   .2978118E-02   .3069517E-02   .3182081E-02   .3292470E-02   .3354792E-02
   .3336351E-02   .3256185E-02   .3154641E-02   .3021767E-02   .2817977E-02
   .2581432E-02   .2400397E-02   .2330791E-02   .2332483E-02   .2334274E-02
   .2315464E-02   .2287796E-02   .2268413E-02   .2320795E-02   .2476059E-02
   .2694135E-02   .2944147E-02   .3169449E-02   .3297026E-02   .3298817E-02
   .3211571E-02   .3088143E-02   .2952310E-02   .2803196E-02   .2662770E-02
   .2568253E-02   .2542365E-02   .2565008E-02   .2602576E-02   .2648147E-02
   .2702082E-02   .2726001E-02   .2721176E-02   .2706289E-02   .2678605E-02
   .2610313E-02   .2478552E-02   .2331062E-02   .2241785E-02   .2226289E-02
   .2243203E-02   .2278106E-02   .2370230E-02   .2492176E-02   .2536460E-02
   .2486449E-02   .2433099E-02   .2430653E-02   .2451555E-02   .2455961E-02
   .2438300E-02   .2416258E-02   .2405445E-02   .2416067E-02   .2435252E-02
   .2433284E-02   .2378987E-02   .2278064E-02   .2163994E-02   .2074014E-02
   .2009624E-02   .1974259E-02   .1981174E-02   .2044551E-02   .2132910E-02
   .2208100E-02   .2252638E-02   .2277048E-02   .2311997E-02   .2379056E-02
   .2459074E-02   .2509094E-02   .2528471E-02   .2554269E-02   .2627038E-02
   .2785535E-02   .3038228E-02   .3297271E-02   .3465785E-02   .3526464E-02
   .3496743E-02   .3376408E-02   .3172701E-02   .2957284E-02   .2825905E-02
   .2802258E-02   .2842944E-02   .2894932E-02   .2916914E-02   .2885745E-02
   .2818546E-02   .2768518E-02   .2750881E-02   .2747286E-02   .2713634E-02
   .2629081E-02   .2500936E-02   .2323335E-02   .2108079E-02   .1897237E-02
   .1739070E-02   .1630863E-02   .1534459E-02   .1465531E-02   .1480211E-02
   .1545528E-02   .1585060E-02   .1550330E-02   .1451961E-02   .1335834E-02
   .1257205E-02   .1256310E-02   .1341102E-02   .1497570E-02   .1653437E-02
   .1721520E-02   .1655872E-02   .1448221E-02   .1143519E-02   .8229423E-03
   .5441173E-03   .3648156E-03   .3033016E-03   .3393979E-03   .4202960E-03
   .4784369E-03   .4686790E-03   .3390225E-03   .9602730E-04  -.1714842E-03
  -.3696256E-03  -.3995885E-03  -.2207431E-03   .8078850E-04   .3547111E-03
   .4307449E-03   .2303777E-03  -.1478401E-03  -.5282290E-03  -.7371383E-03
  -.7230033E-03  -.5587406E-03  -.3427009E-03  -.1735024E-03  -.1105575E-03
  -.1491106E-03  -.2481936E-03  -.3503737E-03  -.4033319E-03  -.3871305E-03
  -.3199537E-03  -.2245909E-03  -.1085476E-03   .2441799E-04   .1222728E-03
   .1020432E-03  -.9026963E-04  -.4425794E-03  -.8477101E-03  -.1142630E-02
  -.1264757E-02  -.1258193E-02  -.1192886E-02  -.1123722E-02  -.1086843E-02
  -.1101904E-02  -.1166943E-02  -.1277101E-02  -.1398527E-02  -.1481880E-02
  -.1496014E-02  -.1455910E-02  -.1380209E-02  -.1280306E-02  -.1201976E-02
  -.1194852E-02  -.1251476E-02  -.1313845E-02  -.1355037E-02  -.1378225E-02
  -.1347169E-02  -.1254717E-02  -.1154285E-02  -.1107498E-02  -.1147262E-02
  -.1238408E-02  -.1309617E-02  -.1354213E-02  -.1438635E-02  -.1554799E-02
  -.1651273E-02  -.1731409E-02  -.1783783E-02  -.1786364E-02  -.1749427E-02
  -.1726020E-02  -.1749001E-02  -.1780369E-02  -.1797836E-02  -.1819673E-02
  -.1853924E-02  -.1917628E-02  -.2027032E-02  -.2136800E-02  -.2191485E-02
  -.2162026E-02  -.2068182E-02  -.1956738E-02  -.1885484E-02  -.1917859E-02
  -.2091290E-02  -.2365759E-02  -.2662915E-02  -.2893979E-02  -.2943828E-02
  -.2779493E-02  -.2509004E-02  -.2276541E-02  -.2180645E-02  -.2229032E-02
  -.2397942E-02  -.2681839E-02  -.3004930E-02  -.3228391E-02  -.3277697E-02
  -.3163952E-02  -.2952847E-02  -.2751944E-02  -.2627308E-02  -.2601988E-02
  -.2694411E-02  -.2905594E-02  -.3180765E-02  -.3453464E-02  -.3687135E-02
  -.3809354E-02  -.3807782E-02  -.3749852E-02  -.3725644E-02  -.3797443E-02
  -.3944837E-02  -.4103497E-02  -.4203931E-02  -.4237200E-02  -.4241298E-02
  -.4208327E-02  -.4110735E-02  -.3967728E-02  -.3828068E-02  -.3700763E-02
  -.3580238E-02  -.3469483E-02  -.3387348E-02  -.3330081E-02  -.3262561E-02
  -.3190490E-02  -.3146342E-02  -.3144034E-02  -.3178236E-02  -.3187492E-02
  -.3142848E-02  -.3126772E-02  -.3205051E-02  -.3386241E-02  -.3609825E-02
  -.3770635E-02  -.3817299E-02  -.3768473E-02  -.3625893E-02  -.3420421E-02
  -.3216938E-02  -.3076892E-02  -.3042919E-02  -.3115736E-02  -.3259461E-02
  -.3418764E-02  -.3569284E-02  -.3718951E-02  -.3858224E-02  -.3969632E-02
  -.4077531E-02  -.4182051E-02  -.4275874E-02  -.4340503E-02  -.4340548E-02
  -.4230387E-02  -.4031231E-02  -.3857638E-02  -.3769817E-02  -.3714455E-02
  -.3647136E-02  -.3612070E-02  -.3630455E-02  -.3662661E-02  -.3682433E-02
  -.3689993E-02  -.3711257E-02  -.3788239E-02  -.3921287E-02  -.4073928E-02
  -.4187284E-02  -.4203290E-02  -.4104332E-02  -.3906116E-02  -.3654416E-02
  -.3440000E-02  -.3368093E-02  -.3448586E-02  -.3578500E-02  -.3667619E-02
  -.3721490E-02  -.3763294E-02  -.3771280E-02  -.3779129E-02  -.3836657E-02
  -.3953433E-02  -.4088859E-02  -.4164484E-02  -.4108829E-02  -.3879716E-02
  -.3506983E-02  -.3076934E-02  -.2706369E-02  -.2494834E-02  -.2475571E-02
  -.2633982E-02  -.2893688E-02  -.3138152E-02  -.3269565E-02  -.3218756E-02
  -.2975337E-02  -.2627961E-02  -.2288287E-02  -.2068800E-02  -.2015624E-02
  -.2102808E-02  -.2312799E-02  -.2591868E-02  -.2844699E-02  -.3008725E-02
  -.3075533E-02  -.3043934E-02  -.2928283E-02  -.2786402E-02  -.2688384E-02
  -.2612588E-02  -.2545654E-02  -.2505076E-02  -.2461409E-02  -.2387737E-02
  -.2297811E-02  -.2212312E-02  -.2128197E-02  -.2058776E-02  -.2021133E-02
  -.1995007E-02  -.1937319E-02  -.1804480E-02  -.1625499E-02  -.1504246E-02
  -.1510098E-02  -.1594228E-02  -.1699639E-02  -.1839294E-02  -.1962363E-02
  -.2003794E-02  -.1991231E-02  -.1979274E-02  -.1985186E-02  -.2010248E-02
  -.2049836E-02  -.2081873E-02  -.2077063E-02  -.1998441E-02  -.1852734E-02
  -.1690841E-02  -.1566820E-02  -.1564161E-02  -.1743859E-02  -.2075565E-02
  -.2451739E-02  -.2730356E-02  -.2825145E-02  -.2741286E-02  -.2518092E-02
  -.2212494E-02  -.1914270E-02  -.1731099E-02  -.1691573E-02  -.1715627E-02
  -.1691759E-02  -.1572950E-02  -.1368310E-02  -.1100582E-02  -.8268893E-03
  -.6539538E-03  -.6689500E-03  -.8902425E-03  -.1263238E-02  -.1708589E-02
  -.2087265E-02  -.2261908E-02  -.2228065E-02  -.2078221E-02  -.1889397E-02
  -.1731887E-02  -.1677393E-02  -.1742651E-02  -.1865754E-02  -.1928081E-02
  -.1843157E-02  -.1620916E-02  -.1347963E-02  -.1125573E-02  -.1017046E-02
  -.1046421E-02  -.1160600E-02  -.1256052E-02  -.1262912E-02  -.1227658E-02
  -.1203285E-02  -.1179483E-02  -.1137230E-02  -.1058442E-02  -.9745266E-03
  -.8778487E-03  -.6971584E-03  -.4022599E-03  -.2014374E-04   .3703562E-03
   .6477242E-03   .7646816E-03   .7353368E-03   .5790456E-03   .3339320E-03
   .5813281E-04  -.1459662E-03  -.1742582E-03  -.1773640E-04   .2159128E-03
   .4332720E-03   .5843295E-03   .6035179E-03   .4759067E-03   .2556478E-03
   .6525559E-04  -.1014635E-04   .3812317E-04   .1897288E-03   .4118208E-03
   .6289375E-03   .8028185E-03   .9224809E-03   .9577963E-03   .9133156E-03
   .8533615E-03   .8508990E-03   .9370973E-03   .1109277E-02   .1309499E-02
   .1430883E-02   .1453748E-02   .1436071E-02   .1374944E-02   .1276348E-02
   .1175383E-02   .1105610E-02   .1065051E-02   .1019950E-02   .9245158E-03
   .7138111E-03   .3904508E-03   .8543839E-04  -.7381867E-04  -.5363659E-04
   .1422430E-03   .4634726E-03   .8226903E-03   .1114626E-02   .1244557E-02
   .1184456E-02   .1004761E-02   .7921794E-03   .6137502E-03   .5193322E-03
   .5248386E-03   .6521857E-03   .8687612E-03   .1066676E-02   .1142491E-02
   .1082614E-02   .9417403E-03   .8048666E-03   .7406240E-03   .7762528E-03
   .9331778E-03   .1180048E-02   .1393017E-02   .1408578E-02   .1169097E-02
   .7475817E-03   .2952337E-03  -.3651299E-04  -.1767961E-03  -.1150717E-03
   .1325321E-03   .4895407E-03   .8242747E-03   .1054750E-02   .1145299E-02
   .1103224E-02   .9698795E-03   .8129395E-03   .7187646E-03   .7538309E-03
   .9429530E-03   .1240219E-02   .1536477E-02   .1701904E-02   .1679478E-02
   .1520977E-02   .1285123E-02   .1002825E-02   .7084545E-03   .4401713E-03
   .2867656E-03   .3169919E-03   .5079959E-03   .7740915E-03   .1028319E-02
   .1184141E-02   .1136910E-02   .8257006E-03   .3015139E-03  -.3032267E-03
  -.8346329E-03  -.1185797E-02  -.1284585E-02  -.1144783E-02  -.8147363E-03
  -.3547242E-03   .1359769E-03   .5581854E-03   .8216492E-03   .8645486E-03
   .6937810E-03   .3765874E-03  -.7127006E-05  -.3896018E-03  -.6715879E-03
  -.8140727E-03  -.8691610E-03  -.8422337E-03  -.7045945E-03  -.4564692E-03
  -.1416364E-03   .1838323E-03   .4970720E-03   .8032137E-03   .1065115E-02
   .1245289E-02   .1323198E-02   .1279717E-02   .1105341E-02   .8136324E-03
   .4648823E-03   .1374856E-03  -.9673335E-04  -.2071460E-03  -.1925701E-03
  -.4029366E-04   .2182435E-03   .5030309E-03   .7719266E-03   .1057704E-02
   .1345522E-02   .1551609E-02   .1610911E-02   .1535914E-02   .1368824E-02
   .1158636E-02   .9476493E-03   .7463597E-03   .5959076E-03   .5501903E-03
   .5456266E-03   .4961975E-03   .4007192E-03   .3074010E-03   .3066244E-03
   .4412922E-03   .6513579E-03   .8486236E-03   .1014509E-02   .1140134E-02
   .1183582E-02   .1126295E-02   .9721806E-03   .7715138E-03   .6257303E-03
   .6042772E-03   .7497637E-03   .1074586E-02   .1531975E-02   .2028957E-02
   .2448624E-02   .2687678E-02   .2690804E-02   .2497676E-02   .2196982E-02
   .1904330E-02   .1719270E-02   .1649279E-02   .1639523E-02   .1643704E-02
   .1659284E-02   .1706113E-02   .1810424E-02   .1976855E-02   .2196081E-02
   .2473984E-02   .2774922E-02   .2985443E-02   .3040948E-02   .2943723E-02
   .2709322E-02   .2385697E-02   .2081166E-02   .1858592E-02   .1733975E-02
   .1745032E-02   .1890014E-02   .2095710E-02   .2267116E-02   .2343694E-02
   .2336740E-02   .2302701E-02   .2289541E-02   .2331240E-02   .2430362E-02
   .2562899E-02   .2736965E-02   .2982375E-02   .3252699E-02   .3445896E-02
   .3500359E-02   .3464718E-02   .3409584E-02   .3360611E-02   .3333727E-02
   .3310050E-02   .3241625E-02   .3126069E-02   .3030833E-02   .2965568E-02
   .2865812E-02   .2711320E-02   .2547302E-02   .2428668E-02   .2384620E-02
   .2428200E-02   .2558713E-02   .2759472E-02   .2983296E-02   .3129109E-02
   .3104757E-02   .2904350E-02   .2636587E-02   .2399511E-02   .2232259E-02
   .2165637E-02   .2192077E-02   .2237687E-02   .2214612E-02   .2128492E-02
   .2086870E-02   .2153964E-02   .2278070E-02   .2392641E-02   .2488255E-02
   .2585838E-02   .2696242E-02   .2808745E-02   .2905921E-02   .3005387E-02
   .3113345E-02   .3170488E-02   .3141420E-02   .3089398E-02   .3094181E-02
   .3178061E-02   .3327933E-02   .3544542E-02   .3791607E-02   .3921561E-02
   .3841641E-02   .3562569E-02   .3194536E-02   .2920655E-02   .2839304E-02
   .2870737E-02   .2887805E-02   .2833822E-02   .2701286E-02   .2517316E-02
   .2319701E-02   .2079859E-02   .1761811E-02   .1417037E-02   .1132351E-02
   .9861589E-03   .1012228E-02   .1192968E-02   .1481240E-02   .1799177E-02
   .2076594E-02   .2238326E-02   .2236361E-02   .2077347E-02   .1823601E-02
   .1573558E-02   .1421864E-02   .1442595E-02   .1654580E-02   .2004723E-02
   .2365070E-02   .2613048E-02   .2676011E-02   .2549286E-02   .2328233E-02
   .2120836E-02   .1997727E-02   .2002936E-02   .2090491E-02   .2183573E-02
   .2222838E-02   .2147573E-02   .1938411E-02   .1684424E-02   .1487043E-02
   .1353815E-02   .1274449E-02   .1251526E-02   .1235505E-02   .1172110E-02
   .1030068E-02   .7811615E-03   .4611293E-03   .1832598E-03   .1963620E-04
  -.5305269E-04  -.7984656E-04  -.1597868E-04   .2122213E-03   .5801699E-03
   .9847081E-03   .1337391E-02   .1590789E-02   .1684651E-02   .1634701E-02
   .1574407E-02   .1582912E-02   .1619273E-02   .1614882E-02   .1576488E-02
   .1581147E-02   .1669380E-02   .1810042E-02   .1955846E-02   .2039790E-02
   .1993690E-02   .1834049E-02   .1631990E-02   .1445837E-02   .1331836E-02
   .1327208E-02   .1444262E-02   .1682381E-02   .1981982E-02   .2258871E-02
   .2460208E-02   .2553221E-02   .2516675E-02   .2328759E-02   .2046005E-02
   .1761857E-02   .1524508E-02   .1392756E-02   .1425824E-02   .1564929E-02
   .1732212E-02   .1890722E-02   .1968435E-02   .1891084E-02   .1639306E-02
   .1252132E-02   .8388844E-03   .4532553E-03   .5791931E-04  -.3413595E-03
  -.6946707E-03  -.9629365E-03  -.1090518E-02  -.9864985E-03  -.5889874E-03
   .3450024E-04   .6684157E-03   .1066784E-02   .1102596E-02   .7807802E-03
   .2301445E-03  -.3466221E-03  -.7728546E-03  -.9715700E-03  -.9185550E-03
  -.6446972E-03  -.3241249E-03  -.1683296E-03  -.2841964E-03  -.6240285E-03
  -.1052067E-02  -.1409810E-02  -.1556918E-02  -.1434969E-02  -.1080704E-02
  -.6400158E-03  -.3162902E-03  -.2273857E-03  -.3421837E-03  -.5795147E-03
  -.8621623E-03  -.1078214E-02  -.1134081E-02  -.1006604E-02  -.7343715E-03
  -.4841658E-03  -.4310629E-03  -.5921629E-03  -.8621717E-03  -.1080566E-02
  -.1137025E-02  -.1034124E-02  -.8462621E-03  -.6845320E-03  -.6072463E-03
  -.6526759E-03  -.8768731E-03  -.1292973E-02  -.1787129E-02  -.2155456E-02
  -.2287894E-02  -.2191763E-02  -.1899357E-02  -.1461304E-02  -.9851761E-03
  -.6228294E-03  -.4799778E-03  -.5725670E-03  -.8521335E-03  -.1196769E-02
  -.1527274E-02  -.1806092E-02  -.2021603E-02  -.2188459E-02  -.2239456E-02
  -.2108235E-02  -.1851085E-02  -.1564614E-02  -.1315646E-02  -.1118194E-02
  -.9599140E-03  -.8743930E-03  -.8976171E-03  -.1022891E-02  -.1222274E-02
  -.1507825E-02  -.1899738E-02  -.2369859E-02  -.2794740E-02  -.3042499E-02
  -.3063599E-02  -.2860111E-02  -.2502411E-02  -.2104549E-02  -.1738364E-02
  -.1479882E-02  -.1384149E-02  -.1424010E-02  -.1533008E-02  -.1647058E-02
  -.1694707E-02  -.1641929E-02  -.1549202E-02  -.1514830E-02  -.1625483E-02
  -.1883009E-02  -.2229464E-02  -.2561911E-02  -.2763589E-02  -.2774604E-02
  -.2601809E-02  -.2337984E-02  -.2103345E-02  -.1993294E-02  -.2070249E-02
  -.2314781E-02  -.2614746E-02  -.2830272E-02  -.2859400E-02  -.2692475E-02
  -.2411842E-02  -.2112670E-02  -.1882004E-02  -.1774247E-02  -.1779161E-02
  -.1858270E-02  -.1930466E-02  -.1936945E-02  -.1876247E-02  -.1771267E-02
  -.1710235E-02  -.1763911E-02  -.1903469E-02  -.2046615E-02  -.2120120E-02
  -.2092827E-02  -.1972902E-02  -.1801554E-02  -.1609390E-02  -.1429756E-02
  -.1305593E-02  -.1277436E-02  -.1414670E-02  -.1733139E-02  -.2148617E-02
  -.2526284E-02  -.2787174E-02  -.2925142E-02  -.2969697E-02  -.2943822E-02
  -.2894996E-02  -.2861090E-02  -.2860734E-02  -.2890432E-02  -.2909639E-02
  -.2908223E-02  -.2906341E-02  -.2921911E-02  -.2940824E-02  -.2918612E-02
  -.2800947E-02  -.2554606E-02  -.2236251E-02  -.1974572E-02  -.1905734E-02
  -.2048511E-02  -.2310088E-02  -.2607742E-02  -.2871344E-02  -.3059477E-02
  -.3206451E-02  -.3359686E-02  -.3557459E-02  -.3801254E-02  -.4044616E-02
  -.4203827E-02  -.4203856E-02  -.4045162E-02  -.3811140E-02  -.3649797E-02
  -.3642849E-02  -.3756762E-02  -.3936659E-02  -.4159012E-02  -.4424894E-02
  -.4683861E-02  -.4845797E-02  -.4875786E-02  -.4800262E-02  -.4646843E-02
  -.4475102E-02  -.4356289E-02  -.4334082E-02  -.4421638E-02  -.4579508E-02
  -.4710922E-02  -.4701948E-02  -.4478568E-02  -.4045448E-02  -.3490289E-02
  -.2994982E-02  -.2729483E-02  -.2767798E-02  -.3026258E-02  -.3316110E-02
  -.3444735E-02  -.3301914E-02  -.2895659E-02  -.2313442E-02  -.1731412E-02
  -.1371113E-02  -.1411390E-02  -.1895786E-02  -.2684128E-02  -.3508337E-02
  -.4116700E-02  -.4368919E-02  -.4283321E-02  -.3984786E-02  -.3596930E-02
  -.3238636E-02  -.3019023E-02  -.2978336E-02  -.3058203E-02  -.3118500E-02
  -.3047691E-02  -.2879634E-02  -.2783204E-02  -.2964396E-02  -.3515513E-02
  -.4302221E-02  -.5034577E-02  -.5471207E-02  -.5464013E-02  -.4997141E-02
  -.4223822E-02  -.3379327E-02  -.2649557E-02  -.2151616E-02  -.2004938E-02
  -.2231982E-02  -.2719647E-02  -.3304081E-02  -.3813563E-02  -.4122593E-02
  -.4186158E-02  -.4018886E-02  -.3660465E-02  -.3215845E-02  -.2832886E-02
  -.2603694E-02  -.2534009E-02  -.2589787E-02  -.2760742E-02  -.3068313E-02
  -.3479475E-02  -.3916942E-02  -.4287950E-02  -.4537221E-02  -.4625946E-02
  -.4481114E-02  -.4087473E-02  -.3549959E-02  -.3035636E-02  -.2692139E-02
  -.2572852E-02  -.2671348E-02  -.2919479E-02  -.3220974E-02  -.3500588E-02
  -.3668565E-02  -.3655390E-02  -.3424284E-02  -.3029127E-02  -.2605667E-02
  -.2305430E-02  -.2224615E-02  -.2377528E-02  -.2705542E-02  -.3133824E-02
[truncated: 170,241 more chars]
