# Supplementary material for: Earthquake Response Analysis of Tall Reinforced Concrete Chimneys considering Eccentricity
Source: Hindawi journal article supplement (doi:10.1155/2020/1417969), 2020-03-11
Supplement: f1 [file 1417969.f1.zip › 1417969.f1/Four kinds of earthquake records/Soft soil/IMPVALL H-E03-UP.txt]

PEER STRONG MOTION DATABASE RECORD. PROCESSING BY PACIFIC ENGINEERING.
IMPERIAL VALLEY 10/15/79 2316, EL CENTRO ARRAY #3,  UP (USGS STATION 5057)
ACCELERATION TIME HISTORY IN UNITS OF G. FILTER POINTS: HP=0.1 Hz LP=40.0 Hz
NPTS=  7909, DT= .00500 SEC
   .2144360E-03   .3160466E-03   .4838022E-03   .5206897E-03   .5021521E-03
   .4903047E-03   .4835508E-03   .4836208E-03   .4935292E-03   .5142769E-03
   .5409307E-03   .5655039E-03   .5847096E-03   .6020995E-03   .6217181E-03
   .6424530E-03   .6580639E-03   .6596818E-03   .6418921E-03   .6086897E-03
   .5689034E-03   .5283789E-03   .4884917E-03   .4492905E-03   .4136673E-03
   .3894985E-03   .3847527E-03   .3967498E-03   .4174036E-03   .4478191E-03
   .4917897E-03   .5450845E-03   .6000629E-03   .6523034E-03   .7019857E-03
   .7514971E-03   .7993425E-03   .8350768E-03   .8408354E-03   .7901019E-03
   .6469845E-03   .3975044E-03   .8374012E-04  -.2294116E-03  -.5016352E-03
  -.6526177E-03  -.5477474E-03  -.1813461E-03   .2848877E-03   .7295897E-03
   .1170157E-02   .1647592E-02   .2096581E-02   .2376840E-02   .2428769E-02
   .2313619E-02   .2088972E-02   .1726046E-02   .1164523E-02   .4339125E-03
  -.2993168E-03  -.7943264E-03  -.9076949E-03  -.7405223E-03  -.4982680E-03
  -.2592027E-03   .3576145E-04   .4426989E-03   .8989286E-03   .1241483E-02
   .1320005E-02   .1096436E-02   .6558743E-03   .1234989E-03  -.3827345E-03
  -.7688497E-03  -.1020019E-02  -.1184529E-02  -.1284202E-02  -.1284215E-02
  -.1124682E-02  -.7485476E-03  -.1286538E-03   .7678154E-03   .2000145E-02
   .3568848E-02   .5364666E-02   .7202414E-02   .8837605E-02   .9878275E-02
   .9871145E-02   .8481969E-02   .5670693E-02   .1968712E-02  -.1867575E-02
  -.5384990E-02  -.8026601E-02  -.9081785E-02  -.8708340E-02  -.7913968E-02
  -.7325968E-02  -.6810561E-02  -.6060575E-02  -.5038651E-02  -.3911535E-02
  -.2800035E-02  -.1660796E-02  -.3690594E-03   .1113457E-02   .2783287E-02
   .4692807E-02   .6824289E-02   .8893801E-02   .1023610E-01   .1022449E-01
   .8980504E-02   .7241234E-02   .5549418E-02   .3873678E-02   .2018091E-02
   .9804801E-04  -.1636583E-02  -.3143503E-02  -.4457540E-02  -.5468413E-02
  -.6003608E-02  -.5973248E-02  -.5433462E-02  -.4500365E-02  -.3219560E-02
  -.1666180E-02   .1544530E-04   .1747010E-02   .3531502E-02   .5371225E-02
   .7197481E-02   .8797927E-02   .9811949E-02   .9745889E-02   .8251523E-02
   .5669446E-02   .2755490E-02  -.2113580E-03  -.3160029E-02  -.5332565E-02
  -.6034711E-02  -.5744013E-02  -.5394892E-02  -.5315269E-02  -.5245384E-02
  -.4875795E-02  -.4116806E-02  -.2880493E-02  -.7981279E-03   .2258143E-02
   .5501046E-02   .7834557E-02   .8713019E-02   .8129325E-02   .6377378E-02
   .3997246E-02   .1483605E-02  -.1026712E-02  -.3498007E-02  -.5579420E-02
  -.6680872E-02  -.6319054E-02  -.4508328E-02  -.1792745E-02   .1476219E-02
   .5262992E-02   .9367577E-02   .1353580E-01   .1761023E-01   .2117987E-01
   .2273084E-01   .2012494E-01   .1348669E-01   .5692970E-02  -.1123743E-02
  -.7172404E-02  -.1325540E-01  -.1908038E-01  -.2273175E-01  -.2182014E-01
  -.1620313E-01  -.8609908E-02  -.1686844E-02   .3578016E-02   .6052351E-02
   .4741680E-02   .1176513E-02  -.2082035E-02  -.4382406E-02  -.5660936E-02
  -.4205981E-02   .9446369E-03   .7596730E-02   .1206658E-01   .1076219E-01
   .2303773E-02  -.1000198E-01  -.2067238E-01  -.2638952E-01  -.2637960E-01
  -.2141454E-01  -.1367347E-01  -.5490235E-02   .2441333E-02   .1073874E-01
   .1883357E-01   .2406363E-01   .2418156E-01   .1941017E-01   .1194357E-01
   .4157895E-02  -.3121990E-02  -.1039972E-01  -.1748802E-01  -.2193751E-01
  -.2060898E-01  -.1388121E-01  -.5778687E-02   .9450879E-03   .6550185E-02
   .1092387E-01   .1227048E-01   .1034971E-01   .7451562E-02   .5289758E-02
   .3507193E-02   .1193335E-02  -.1766054E-02  -.4878065E-02  -.7706866E-02
  -.1016505E-01  -.1220645E-01  -.1353101E-01  -.1385623E-01  -.1317917E-01
  -.1171477E-01  -.9565654E-02  -.6583682E-02  -.2446520E-02   .3050470E-02
   .9398064E-02   .1566998E-01   .2102099E-01   .2414587E-01   .2357484E-01
   .1963711E-01   .1465895E-01   .1035588E-01   .6466770E-02   .2114006E-02
  -.2878106E-02  -.8104571E-02  -.1320865E-01  -.1816933E-01  -.2311465E-01
  -.2800801E-01  -.3233131E-01  -.3479850E-01  -.3275623E-01  -.2416421E-01
  -.1140890E-01   .1016832E-02   .1131990E-01   .1893292E-01   .2201170E-01
   .2032005E-01   .1692500E-01   .1446302E-01   .1271415E-01   .1037709E-01
   .7124187E-02   .3547552E-02   .1806103E-03  -.2897666E-02  -.5598107E-02
  -.7209567E-02  -.6218808E-02  -.5543016E-03   .1037897E-01   .2397738E-01
   .3671860E-01   .4626243E-01   .5039066E-01   .4612599E-01   .3246280E-01
   .1339269E-01  -.5263096E-02  -.1929125E-01  -.2723197E-01  -.3204036E-01
  -.3773857E-01  -.4468692E-01  -.5010130E-01  -.4898001E-01  -.3597345E-01
  -.1202254E-01   .1490679E-01   .3827938E-01   .5579520E-01   .6477086E-01
   .6302384E-01   .5349591E-01   .4183187E-01   .3069737E-01   .1934504E-01
   .6679381E-02  -.7060847E-02  -.2068149E-01  -.3284773E-01  -.4132402E-01
  -.4194454E-01  -.3252385E-01  -.1751348E-01  -.3918360E-02   .3873683E-02
   .3748140E-02  -.2694625E-02  -.1017519E-01  -.1557261E-01  -.2006399E-01
  -.2479160E-01  -.2774946E-01  -.2552685E-01  -.1756674E-01  -.7222324E-02
   .1905119E-02   .8477492E-02   .1147859E-01   .8981736E-02   .4222646E-03
  -.1222510E-01  -.2522813E-01  -.3358079E-01  -.3260632E-01  -.2261767E-01
  -.9638525E-02   .2792915E-03   .3739846E-02   .7942170E-03  -.4479168E-02
  -.8250707E-02  -.1049437E-01  -.1298171E-01  -.1653869E-01  -.2153556E-01
  -.2923252E-01  -.3997024E-01  -.5058665E-01  -.5463599E-01  -.4653934E-01
  -.2790968E-01  -.7950982E-02   .4311389E-02   .7813563E-02   .8456376E-02
   .1111122E-01   .1550446E-01   .1898805E-01   .2013650E-01   .1930335E-01
   .1736216E-01   .1477082E-01   .1170668E-01   .8422830E-02   .5113725E-02
   .1849053E-02  -.1306758E-02  -.4173119E-02  -.6510149E-02  -.8133928E-02
  -.8694071E-02  -.7736566E-02  -.5031374E-02  -.4277224E-03   .6139708E-02
   .1419558E-01   .2258833E-01   .2974375E-01   .3342661E-01   .2995009E-01
   .1726893E-01  -.6576703E-03  -.1724095E-01  -.2758926E-01  -.2987393E-01
  -.2710123E-01  -.2377089E-01  -.2094229E-01  -.1711538E-01  -.1149335E-01
  -.4783688E-02   .2066300E-02   .8468540E-02   .1406223E-01   .1900671E-01
   .2371220E-01   .2802831E-01   .3125572E-01   .3162744E-01   .2718893E-01
   .1891038E-01   .9578792E-02   .1005149E-02  -.5146566E-02  -.7097254E-02
  -.5261492E-02  -.2320447E-02   .4194292E-03   .3932794E-02   .8709959E-02
   .1400522E-01   .1913885E-01   .2410222E-01   .2911594E-01   .3423954E-01
   .3943605E-01   .4455670E-01   .4946221E-01   .5377125E-01   .5548964E-01
   .5006487E-01   .3375166E-01   .8653402E-02  -.1912126E-01  -.4550185E-01
  -.6886492E-01  -.8501852E-01  -.8810400E-01  -.7704129E-01  -.5625060E-01
  -.3175810E-01  -.8296006E-02   .1068128E-01   .2190157E-01   .2375402E-01
   .1908462E-01   .1330066E-01   .8958192E-02   .4803035E-02  -.8025864E-03
  -.7520283E-02  -.1389082E-01  -.1926338E-01  -.2418103E-01  -.2932583E-01
  -.3470835E-01  -.3985799E-01  -.4388046E-01  -.4367194E-01  -.3491516E-01
  -.1852863E-01  -.1239097E-02   .1114997E-01   .1716627E-01   .1918136E-01
   .2080046E-01   .2350117E-01   .2639319E-01   .2829296E-01   .2894851E-01
   .2827832E-01   .2542724E-01   .1989427E-01   .1269925E-01   .5686722E-02
   .1406068E-03  -.3558213E-02  -.4507877E-02  -.1029715E-02   .6599205E-02
   .1524159E-01   .2140389E-01   .2154993E-01   .1257667E-01  -.3573641E-02
  -.2000271E-01  -.2991918E-01  -.3027982E-01  -.2466083E-01  -.1968860E-01
  -.1750069E-01  -.1564007E-01  -.1201860E-01  -.7071796E-02  -.2189811E-02
   .2068459E-02   .5987318E-02   .9603455E-02   .1027732E-01   .3280571E-02
  -.1148277E-01  -.2838199E-01  -.4165221E-01  -.4628159E-01  -.3983907E-01
  -.2685809E-01  -.1464185E-01  -.5484949E-02   .3009088E-02   .1281462E-01
   .2344780E-01   .3365450E-01   .4302561E-01   .5159340E-01   .5787497E-01
   .5693040E-01   .4430588E-01   .2325886E-01   .1653753E-02  -.1655119E-01
  -.2982161E-01  -.3529676E-01  -.3324388E-01  -.2878097E-01  -.2567054E-01
  -.2314391E-01  -.1924957E-01  -.1384182E-01  -.7934159E-02  -.1763656E-02
   .5301894E-02   .1319679E-01   .2020770E-01   .2157443E-01   .1291572E-01
  -.2341325E-02  -.1639004E-01  -.2557624E-01  -.3079527E-01  -.3410815E-01
  -.3682916E-01  -.3917579E-01  -.4058002E-01  -.3922345E-01  -.3140730E-01
  -.1555279E-01   .4017966E-02   .2230660E-01   .3878440E-01   .5454878E-01
   .6888118E-01   .7913468E-01   .8095159E-01   .6963053E-01   .4348178E-01
   .6189733E-02  -.3354987E-01  -.6458723E-01  -.7903517E-01  -.7739198E-01
  -.6530649E-01  -.4757857E-01  -.2721056E-01  -.5909875E-02   .1493168E-01
   .3274427E-01   .4453059E-01   .4841535E-01   .4448277E-01   .3468217E-01
   .2210131E-01   .9376170E-02  -.2960158E-02  -.1567937E-01  -.2847354E-01
  -.3913758E-01  -.4519645E-01  -.4579692E-01  -.4190508E-01  -.3551221E-01
  -.2871833E-01  -.2285619E-01  -.1877393E-01  -.1644798E-01  -.1321930E-01
  -.5406373E-02   .6925154E-02   .1992712E-01   .2933321E-01   .3229606E-01
   .3007729E-01   .2711243E-01   .2571080E-01   .2530114E-01   .2531288E-01
   .2593139E-01   .2725842E-01   .2897136E-01   .3067082E-01   .3192517E-01
   .3191806E-01   .2829503E-01   .1747132E-01  -.2933547E-03  -.1853666E-01
  -.3023447E-01  -.3202478E-01  -.2417919E-01  -.1081993E-01   .1783245E-02
   .8593221E-02   .9004927E-02   .7287764E-02   .7633479E-02   .1109516E-01
   .1702747E-01   .2372162E-01   .2934134E-01   .3187387E-01   .2829362E-01
   .1801269E-01   .4931543E-02  -.6452748E-02  -.1283839E-01  -.1104730E-01
  -.1591092E-02   .9935212E-02   .1883137E-01   .2381577E-01   .2482021E-01
   .2040619E-01   .7573122E-02  -.1237411E-01  -.3136042E-01  -.4086974E-01
  -.3929978E-01  -.3294626E-01  -.2844454E-01  -.2646583E-01  -.2401487E-01
  -.1948908E-01  -.1392176E-01  -.8684360E-02  -.4012192E-02   .5103453E-03
   .5201354E-02   .1005151E-01   .1490260E-01   .1966859E-01   .2431960E-01
   .2835567E-01   .2982213E-01   .2641108E-01   .1877404E-01   .9502353E-02
  -.4798211E-03  -.1133679E-01  -.2274869E-01  -.3427342E-01  -.4530494E-01
  -.5299794E-01  -.5127390E-01  -.3686758E-01  -.1497776E-01   .5989341E-02
   .2191522E-01   .3399936E-01   .4542699E-01   .5781325E-01   .7066255E-01
   .8265756E-01   .9161239E-01   .9211465E-01   .7792450E-01   .5126051E-01
   .2284061E-01  -.3020468E-03  -.1960489E-01  -.3804798E-01  -.5437533E-01
  -.6450951E-01  -.6672634E-01  -.6271182E-01  -.5284694E-01  -.3614164E-01
  -.1496387E-01   .6235949E-02   .2274642E-01   .3007952E-01   .2924317E-01
   .2698645E-01   .2783655E-01   .3057101E-01   .3214536E-01   .3023326E-01
   .2349791E-01   .1339403E-01   .3097809E-02  -.5316139E-02  -.1090876E-01
  -.1400236E-01  -.1625612E-01  -.1909064E-01  -.2248647E-01  -.2564447E-01
  -.2828708E-01  -.3021437E-01  -.2972664E-01  -.2439647E-01  -.1438586E-01
  -.2804549E-02   .7516335E-02   .1548043E-01   .2143969E-01   .2640778E-01
   .3075338E-01   .3418490E-01   .3613061E-01   .3365241E-01   .2167188E-01
   .3306874E-03  -.2325945E-01  -.4277065E-01  -.5445295E-01  -.5473050E-01
  -.4284882E-01  -.2286873E-01  -.6513823E-03   .1893866E-01   .3087113E-01
   .3260773E-01   .2883460E-01   .2566095E-01   .2468214E-01   .2604715E-01
   .2994383E-01   .3528354E-01   .4026407E-01   .4205779E-01   .3719119E-01
   .2634911E-01   .1462816E-01   .5084632E-02  -.3314315E-02  -.1210881E-01
  -.2073366E-01  -.2776570E-01  -.3298316E-01  -.3709953E-01  -.4038806E-01
  -.4192064E-01  -.4055983E-01  -.3656992E-01  -.3105633E-01  -.2496264E-01
  -.1886788E-01  -.1285759E-01  -.6909719E-02  -.9491197E-03   .5083949E-02
   .1158390E-01   .2003709E-01   .3191006E-01   .4642405E-01   .6038189E-01
   .6779215E-01   .6110399E-01   .4050634E-01   .1623298E-01  -.3795278E-02
  -.2019333E-01  -.3440037E-01  -.4317123E-01  -.4503761E-01  -.4421725E-01
  -.4474834E-01  -.4653511E-01  -.4750329E-01  -.4581299E-01  -.3769549E-01
  -.1912493E-01   .6916931E-02   .3086757E-01   .4415997E-01   .4519542E-01
   .3999142E-01   .3513831E-01   .3099045E-01   .2371683E-01   .1087640E-01
  -.6572705E-02  -.2558606E-01  -.4354382E-01  -.5948983E-01  -.7219922E-01
  -.7895137E-01  -.7801482E-01  -.7058836E-01  -.5937735E-01  -.4559344E-01
  -.2733148E-01  -.2738307E-02   .2558810E-01   .5019248E-01   .6184798E-01
   .5627046E-01   .3900787E-01   .2015375E-01   .5933083E-02  -.1441869E-02
  -.2638334E-02  -.1895391E-02  -.2639196E-02  -.4370761E-02  -.5168343E-02
  -.4364606E-02  -.2874434E-02  -.1702360E-02  -.6465172E-03   .9944671E-03
   .3255659E-02   .5719392E-02   .7971197E-02   .9920345E-02   .1045071E-01
   .7252269E-02   .3626397E-03  -.7382135E-02  -.1383828E-01  -.1914012E-01
  -.2390306E-01  -.2772272E-01  -.2948819E-01  -.2789723E-01  -.2317381E-01
  -.1770581E-01  -.1337686E-01  -.9904517E-02  -.6056529E-02  -.1290637E-02
   .4224151E-02   .1013158E-01   .1619807E-01   .2197332E-01   .2476080E-01
   .2152553E-01   .1394865E-01   .6475163E-02   .5147420E-03  -.5322349E-02
  -.1164977E-01  -.1729699E-01  -.2032507E-01  -.2039612E-01  -.1925616E-01
  -.1855053E-01  -.1848075E-01  -.1816642E-01  -.1729445E-01  -.1594631E-01
  -.1338039E-01  -.9142900E-02  -.4052700E-02   .1014285E-02   .4691461E-02
   .4380100E-02  -.2153880E-03  -.5957237E-02  -.1028938E-01  -.1313365E-01
  -.1466224E-01  -.1408734E-01  -.1096235E-01  -.5678061E-02   .6490701E-03
   .6780439E-02   .1110101E-01   .9968276E-02   .9837244E-03  -.1158477E-01
  -.1845155E-01  -.1310189E-01   .1851245E-02   .1717738E-01   .2622322E-01
   .3045817E-01   .3524951E-01   .4281207E-01   .5147594E-01   .5909409E-01
   .6421199E-01   .6364758E-01   .5464103E-01   .4055407E-01   .2714093E-01
   .1600379E-01   .6475176E-02  -.1168621E-02  -.6005517E-02  -.7389580E-02
  -.5968226E-02  -.3671670E-02  -.1356112E-02   .2201108E-03  -.2618151E-02
  -.1239838E-01  -.2583902E-01  -.3645900E-01  -.3824990E-01  -.2758359E-01
  -.6049939E-02   .1989382E-01   .4372267E-01   .6265462E-01   .7688926E-01
   .8561256E-01   .8558344E-01   .7506654E-01   .5861953E-01   .4267822E-01
   .2864705E-01   .1538000E-01   .3022545E-02  -.7342821E-02  -.1474878E-01
  -.1893445E-01  -.2036629E-01  -.2021382E-01  -.1986442E-01  -.1973918E-01
  -.1961701E-01  -.1936970E-01  -.1911823E-01  -.1930436E-01  -.2018742E-01
  -.2157805E-01  -.2280457E-01  -.2268313E-01  -.2010168E-01  -.1511502E-01
  -.9218403E-02  -.3794784E-02   .1099995E-02   .5547130E-02   .9016876E-02
   .1152417E-01   .1396871E-01   .1716741E-01   .2204396E-01   .2999716E-01
   .4231044E-01   .5920141E-01   .7755674E-01   .9008842E-01   .8821111E-01
   .6800245E-01   .3505612E-01   .2337972E-02  -.1968899E-01  -.3227876E-01
  -.4528159E-01  -.6482357E-01  -.8809872E-01  -.1092414E+00  -.1238608E+00
  -.1266763E+00  -.1102806E+00  -.7390388E-01  -.2781812E-01   .1795101E-01
   .5996517E-01   .9508854E-01   .1176879E+00   .1249885E+00   .1187085E+00
   .1006978E+00   .7250082E-01   .3845287E-01   .4186367E-02  -.2779024E-01
  -.5734763E-01  -.8244713E-01  -.9841240E-01  -.1022036E+00  -.9670287E-01
  -.8766835E-01  -.7832715E-01  -.6794518E-01  -.5277446E-01  -.3101828E-01
  -.5909220E-02   .1703811E-01   .3286275E-01   .3943820E-01   .3918681E-01
   .3710445E-01   .3564350E-01   .3315074E-01   .2747554E-01   .1854361E-01
   .7604820E-02  -.3932901E-02  -.1406713E-01  -.1986423E-01  -.1961380E-01
  -.1523054E-01  -.1036460E-01  -.6662413E-02  -.3520724E-02  -.8726514E-03
   .1626059E-03  -.3844042E-03  -.1429961E-02  -.2737048E-02  -.4081320E-02
  -.3790124E-02  -.6761123E-03   .3939929E-02   .7548097E-02   .8687475E-02
   .8081629E-02   .7523310E-02   .9160761E-02   .1490053E-01   .2394015E-01
   .3321625E-01   .3941206E-01   .3918945E-01   .3045096E-01   .1529614E-01
  -.7010395E-03  -.1292231E-01  -.1775703E-01  -.1361252E-01  -.4718002E-02
   .3064530E-02   .8704524E-02   .1465345E-01   .2153030E-01   .2588367E-01
   .2327661E-01   .1371594E-01   .3458861E-02   .4181253E-03   .6511144E-02
   .1632309E-01   .2439331E-01   .3026278E-01   .3627477E-01   .4329449E-01
   .4943547E-01   .5018486E-01   .4004180E-01   .1982621E-01  -.1294229E-02
  -.1461132E-01  -.1730312E-01  -.1101327E-01  -.2859156E-04   .1109479E-01
   .1929608E-01   .2126680E-01   .1516921E-01   .4736155E-02  -.3114027E-02
  -.2229937E-02   .8101932E-02   .2126052E-01   .3084948E-01   .3416271E-01
   .2899681E-01   .1631496E-01   .1537224E-02  -.9980939E-02  -.1536589E-01
  -.1596900E-01  -.1564312E-01  -.1575955E-01  -.1531505E-01  -.1357038E-01
  -.1078812E-01  -.7769393E-02  -.4970823E-02  -.2170065E-02   .1055099E-02
   .4928372E-02   .9986756E-02   .1708237E-01   .2688617E-01   .3949775E-01
   .5180219E-01   .5611008E-01   .4560300E-01   .2216764E-01  -.3953263E-02
  -.2184855E-01  -.2681495E-01  -.2324389E-01  -.1889577E-01  -.1680586E-01
  -.1510452E-01  -.1160896E-01  -.6518861E-02  -.1169364E-02   .3884641E-02
   .8767667E-02   .1320819E-01   .1664404E-01   .1867405E-01   .1910694E-01
   .1723153E-01   .1101741E-01  -.2152712E-03  -.1343795E-01  -.2330244E-01
  -.2365850E-01  -.1088648E-01   .1104982E-01   .3356397E-01   .5146984E-01
   .6339009E-01   .6764005E-01   .5954027E-01   .3521422E-01   .1237538E-02
  -.2636368E-01  -.3563003E-01  -.2857054E-01  -.1691582E-01  -.9013712E-02
  -.5723399E-02  -.6420816E-02  -.1018375E-01  -.1432012E-01  -.1712979E-01
  -.1742619E-01  -.1151732E-01   .2381120E-02   .1963235E-01   .3321173E-01
   .3776571E-01   .3237679E-01   .2266676E-01   .1506570E-01   .1220065E-01
   .1411579E-01   .1819153E-01   .2135076E-01   .2329878E-01   .2551802E-01
   .2870611E-01   .3250101E-01   .3562903E-01   .3552646E-01   .3033363E-01
   .2139757E-01   .1216264E-01   .5467812E-02   .4423397E-02   .1243045E-01
   .2914641E-01   .4929060E-01   .6487189E-01   .6798228E-01   .5533269E-01
   .3252914E-01   .9861122E-02  -.7903516E-02  -.2327498E-01  -.3971186E-01
  -.5692903E-01  -.7095941E-01  -.7666813E-01  -.7024635E-01  -.5207648E-01
  -.2726510E-01  -.6173734E-03   .2461911E-01   .4259235E-01   .4759000E-01
   .3888633E-01   .2089237E-01   .3953519E-03  -.1854751E-01  -.3627750E-01
  -.5367948E-01  -.6820250E-01  -.7521971E-01  -.7372591E-01  -.6743349E-01
  -.5963787E-01  -.5083081E-01  -.4072881E-01  -.2916562E-01  -.1588654E-01
  -.6707773E-03   .1617236E-01   .3265683E-01   .4360311E-01   .4179935E-01
   .2360708E-01  -.5430367E-02  -.3203048E-01  -.4567988E-01  -.4570668E-01
  -.3780487E-01  -.2850710E-01  -.2093289E-01  -.1362262E-01  -.4877218E-02
   .3850568E-02   .8325756E-02   .5676421E-02  -.1524779E-02  -.8455261E-02
  -.1348164E-01  -.1812689E-01  -.2358133E-01  -.3018830E-01  -.3928454E-01
  -.5254531E-01  -.6872807E-01  -.8097695E-01  -.7946418E-01  -.6167942E-01
  -.3720831E-01  -.1646772E-01  -.2431094E-05   .1722073E-01   .3698159E-01
   .5631249E-01   .6942597E-01   .6913069E-01   .5346470E-01   .3038862E-01
   .1056691E-01  -.1283051E-02  -.7630564E-02  -.1402653E-01  -.2311502E-01
  -.3335012E-01  -.4117054E-01  -.4056183E-01  -.2618285E-01   .1352856E-03
   .2810081E-01   .4533061E-01   .4534066E-01   .2986969E-01   .6592571E-02
  -.1583674E-01  -.3050573E-01  -.3349907E-01  -.2890278E-01  -.2689962E-01
  -.3430558E-01  -.4907450E-01  -.6343327E-01  -.7120086E-01  -.6970425E-01
  -.6146328E-01  -.5291558E-01  -.4893998E-01  -.5169704E-01  -.5920470E-01
  -.6483937E-01  -.5920709E-01  -.3757928E-01  -.7954866E-02   .1671357E-01
   .2892635E-01   .2792261E-01   .1986642E-01   .1258929E-01   .8205792E-02
   .3812971E-02  -.2934397E-02  -.1125515E-01  -.1946810E-01  -.2619528E-01
  -.2993636E-01  -.2691211E-01  -.1321142E-01   .7486146E-02   .2675757E-01
   .3870111E-01   .3922984E-01   .2778843E-01   .1036711E-01  -.5003392E-02
  -.1314180E-01  -.1328506E-01  -.7429178E-02   .3177327E-02   .1732656E-01
   .3265559E-01   .4771358E-01   .6137241E-01   .6965786E-01   .6724563E-01
   .5323562E-01   .3305853E-01   .1323918E-01  -.3945163E-02  -.1837971E-01
  -.2780063E-01  -.2865942E-01  -.2091986E-01  -.9744107E-02  -.1006550E-02
   .1441080E-02  -.6285519E-02  -.2491270E-01  -.4841268E-01  -.6961511E-01
  -.8292001E-01  -.8332878E-01  -.6874066E-01  -.4337511E-01  -.1586888E-01
   .7217348E-02   .2328570E-01   .3359258E-01   .4201432E-01   .5060254E-01
   .5817751E-01   .6188969E-01   .5739587E-01   .4366135E-01   .2630586E-01
   .1069564E-01  -.3172365E-02  -.1691647E-01  -.2847304E-01  -.3355481E-01
  -.3149575E-01  -.2663678E-01  -.2249977E-01  -.1901585E-01  -.1584369E-01
  -.1351864E-01  -.1251341E-01  -.1259437E-01  -.1191906E-01  -.5101089E-02
   .1322688E-01   .4162567E-01   .7208433E-01   .9350650E-01   .9858832E-01
   .8813526E-01   .6691318E-01   .3947789E-01   .8553871E-02  -.2259668E-01
  -.4851649E-01  -.6446527E-01  -.6948907E-01  -.6616865E-01  -.5869602E-01
  -.5095551E-01  -.4347466E-01  -.3373005E-01  -.2122610E-01  -.8504305E-02
   .3598092E-02   .1592198E-01   .2845523E-01   .4057389E-01   .5107104E-01
   .5914828E-01   .6397222E-01   .6153632E-01   .4651187E-01   .2104410E-01
  -.4762233E-02  -.2412931E-01  -.3793810E-01  -.4948644E-01  -.5898065E-01
  -.6489535E-01  -.6797124E-01  -.7005649E-01  -.7206762E-01  -.7288556E-01
  -.6908927E-01  -.5606806E-01  -.3423307E-01  -.1054446E-01   .1068226E-01
   .3046284E-01   .5042152E-01   .6946180E-01   .8337947E-01   .8547599E-01
   .7071161E-01   .4350625E-01   .1462864E-01  -.1015215E-01  -.3375307E-01
  -.6001928E-01  -.8738079E-01  -.1108876E+00  -.1230952E+00  -.1135238E+00
  -.7773836E-01  -.2696385E-01   .2474138E-01   .7056007E-01   .1025333E+00
   .1128775E+00   .1029039E+00   .8268733E-01   .6213948E-01   .4414710E-01
   .2602652E-01   .6172278E-02  -.1218073E-01  -.2418713E-01  -.2831639E-01
  -.2667981E-01  -.2138452E-01  -.1248898E-01   .1539070E-03   .1426574E-01
   .2487475E-01   .2639603E-01   .1753189E-01   .3858939E-02  -.7968283E-02
  -.1508796E-01  -.1501106E-01  -.6017841E-02   .8394686E-02   .2286784E-01
   .3560064E-01   .4777164E-01   .5907782E-01   .6469925E-01   .6062895E-01
   .4968185E-01   .3680085E-01   .2455932E-01   .1470799E-01   .8919363E-02
   .7452225E-02   .8221970E-02   .8717362E-02   .8520855E-02   .8724540E-02
   .9554816E-02   .1068272E-01   .1191730E-01   .1228569E-01   .8409265E-02
  -.3739014E-02  -.2217763E-01  -.4030383E-01  -.5353162E-01  -.5885546E-01
  -.5569799E-01  -.4862645E-01  -.4348488E-01  -.4258077E-01  -.4493647E-01
  -.4980840E-01  -.5713959E-01  -.6654967E-01  -.7714848E-01  -.8602565E-01
  -.8723517E-01  -.7576250E-01  -.5384978E-01  -.2926275E-01  -.7643188E-02
   .9765121E-02   .2210624E-01   .2833903E-01   .2833902E-01   .2334843E-01
   .1696657E-01   .1147491E-01   .6604394E-02   .1740287E-02  -.2677758E-02
  -.5941719E-02  -.9018627E-02  -.1197867E-01  -.1429230E-01  -.1635277E-01
  -.1761563E-01  -.1760667E-01  -.1621117E-01  -.1225011E-01  -.5045277E-02
   .6060147E-02   .2126471E-01   .3737677E-01   .5091553E-01   .5820145E-01
   .5517308E-01   .4385440E-01   .3122524E-01   .2115105E-01   .1195726E-01
   .1149455E-02  -.1122824E-01  -.2372597E-01  -.3581749E-01  -.4747870E-01
  -.5882290E-01  -.7044764E-01  -.8178837E-01  -.9095877E-01  -.9401123E-01
  -.8509748E-01  -.6205349E-01  -.3055543E-01   .1600061E-02   .3113799E-01
   .5937998E-01   .8683397E-01   .1084967E+00   .1182783E+00   .1128606E+00
   .9345033E-01   .6434262E-01   .2955947E-01  -.6785859E-02  -.4319450E-01
  -.7785552E-01  -.1050239E+00  -.1196420E+00  -.1190416E+00  -.1006508E+00
  -.6618940E-01  -.2579431E-01   .9090698E-02   .3214277E-01   .4365978E-01
   .4906532E-01   .5368424E-01   .5852993E-01   .6160497E-01   .6163589E-01
   .5912296E-01   .5534220E-01   .5069793E-01   .4543268E-01   .3964376E-01
   .3255522E-01   .2333416E-01   .9787946E-02  -.8223404E-02  -.2697783E-01
  -.4403208E-01  -.5877282E-01  -.7120601E-01  -.8083903E-01  -.8684058E-01
  -.9001966E-01  -.9134716E-01  -.9100569E-01  -.8876599E-01  -.8338280E-01
  -.7121078E-01  -.4771320E-01  -.1568417E-01   .1615651E-01   .4067827E-01
   .5318687E-01   .5330817E-01   .4551555E-01   .3522576E-01   .2433575E-01
   .1196654E-01  -.1935416E-02  -.1637322E-01  -.3067627E-01  -.4256980E-01
  -.4617623E-01  -.3801165E-01  -.2321375E-01  -.9917943E-02  -.1691454E-02
   .1019943E-02  -.5158988E-03  -.3127045E-02  -.4586014E-02  -.5596208E-02
  -.7450904E-02  -.9961726E-02  -.1270312E-01  -.1531164E-01  -.1774388E-01
  -.2092192E-01  -.2544824E-01  -.3071376E-01  -.3591087E-01  -.3742642E-01
  -.2874756E-01  -.9854137E-02   .1181121E-01   .3081861E-01   .4734072E-01
   .6159886E-01   .6967160E-01   .6964017E-01   .6381895E-01   .5339592E-01
   .3829912E-01   .1978452E-01   .2075909E-03  -.1701897E-01  -.2768321E-01
  -.3059824E-01  -.3037775E-01  -.3093839E-01  -.3109846E-01  -.2821619E-01
  -.2043434E-01  -.8550920E-02   .4345383E-02   .1584057E-01   .2656153E-01
   .3820187E-01   .5053827E-01   .6070450E-01   .6505455E-01   .6346519E-01
   .5858427E-01   .5124003E-01   .4034562E-01   .2648008E-01   .1165370E-01
  -.2672557E-02  -.1463402E-01  -.2140016E-01  -.2315794E-01  -.2411057E-01
  -.2705680E-01  -.3095544E-01  -.3384006E-01  -.3478288E-01  -.3284880E-01
  -.2761881E-01  -.1977898E-01  -.9838482E-02   .1690494E-02   .1408611E-01
   .2489997E-01   .2964086E-01   .2726663E-01   .2176043E-01   .1751413E-01
   .1506997E-01   .1200335E-01   .7448011E-02   .2509856E-02  -.2351849E-02
  -.7202701E-02  -.1250444E-01  -.1897204E-01  -.2648956E-01  -.3388286E-01
  -.4024824E-01  -.4601321E-01  -.5087159E-01  -.5443989E-01  -.5490702E-01
  -.4931019E-01  -.3862710E-01  -.2585999E-01  -.1352134E-01  -.2048981E-02
   .9660910E-02   .2102515E-01   .2944819E-01   .3028781E-01   .1825188E-01
  -.7444445E-02  -.3737308E-01  -.5905837E-01  -.6789352E-01  -.6449008E-01
  -.5161099E-01  -.3528050E-01  -.2038937E-01  -.6360313E-02   .9238216E-02
   .2677843E-01   .4365516E-01   .5323707E-01   .4953938E-01   .3400265E-01
   .1518567E-01  -.4426001E-03  -.1461510E-01  -.2968473E-01  -.4259855E-01
  -.4815127E-01  -.4318429E-01  -.3018807E-01  -.1586115E-01  -.3382479E-02
   .8148628E-02   .1815637E-01   .2512991E-01   .2941458E-01   .3244053E-01
   .3543576E-01   .3774824E-01   .3774661E-01   .3498335E-01   .2984756E-01
   .2388672E-01   .1805939E-01   .1285153E-01   .8618265E-02   .4230634E-02
  -.3835562E-03  -.4828917E-02  -.9315011E-02  -.1297349E-01  -.1554165E-01
  -.1757418E-01  -.1906469E-01  -.2041928E-01  -.2204665E-01  -.2392303E-01
  -.2559761E-01  -.2559349E-01  -.2239283E-01  -.1564020E-01  -.7217807E-02
   .5649111E-03   .7809499E-02   .1539249E-01   .2328955E-01   .3073105E-01
   .3691265E-01   .4192260E-01   .4586246E-01   .4832001E-01   .4852556E-01
   .4612283E-01   .4174351E-01   .3613290E-01   .3057395E-01   .2596731E-01
   .2257314E-01   .2173092E-01   .2495281E-01   .3210649E-01   .4108404E-01
   .4957473E-01   .5586117E-01   .5607833E-01   .4578241E-01   .2647466E-01
   .4638145E-02  -.1520609E-01  -.3203695E-01  -.4576480E-01  -.5537912E-01
  -.6039669E-01  -.6271354E-01  -.6390651E-01  -.6233591E-01  -.5355964E-01
  -.3574622E-01  -.1391028E-01   .4740965E-02   .1585881E-01   .1871040E-01
   .1676493E-01   .1489714E-01   .1463944E-01   .1439243E-01   .1237322E-01
   .8274780E-02   .3425022E-02   .5295580E-04  -.2960159E-04   .2402391E-02
   .4895546E-02   .6149889E-02   .7120700E-02   .8931340E-02   .1063396E-01
   .1135071E-01   .1079256E-01   .9301671E-02   .7654028E-02   .5821566E-02
   .3685903E-02   .1087276E-02  -.2213992E-02  -.6392272E-02  -.1166880E-01
  -.1741974E-01  -.2217274E-01  -.2482774E-01  -.2407838E-01  -.1863523E-01
  -.8574779E-02   .4723425E-02   .1951891E-01   .3464396E-01   .4919644E-01
   .6161950E-01   .6944452E-01   .6919820E-01   .5968884E-01   .4559895E-01
   .3241161E-01   .2125540E-01   .1085683E-01   .1050886E-02  -.6440277E-02
  -.9914681E-02  -.9827171E-02  -.7366135E-02  -.2603005E-02   .3768890E-02
   .1027228E-01   .1409242E-01   .1248862E-01   .7139538E-02   .1954451E-02
  -.2144801E-02  -.6738386E-02  -.1248631E-01  -.1870261E-01  -.2440699E-01
  -.2865201E-01  -.3126786E-01  -.3302391E-01  -.3352212E-01  -.3231468E-01
  -.3030380E-01  -.2814760E-01  -.2616865E-01  -.2389137E-01  -.2121720E-01
  -.1839526E-01  -.1517152E-01  -.1117901E-01  -.6163596E-02   .5555662E-03
   .9819251E-02   .2114889E-01   .3379076E-01   .4545330E-01   .5225530E-01
   .5149466E-01   .4398926E-01   .3389720E-01   .2505117E-01   .1920117E-01
   .1550564E-01   .1178707E-01   .7256202E-02   .2554749E-02  -.1664064E-02
  -.5940464E-02  -.1173571E-01  -.1985404E-01  -.2944074E-01  -.3847631E-01
  -.4435291E-01  -.4391639E-01  -.3604556E-01  -.2372116E-01  -.1102791E-01
   .6817287E-03   .1228311E-01   .2489439E-01   .3851033E-01   .5199462E-01
   .6291303E-01   .6766550E-01   .6274674E-01   .4781954E-01   .2876227E-01
   .1137757E-01  -.2679827E-02  -.1309945E-01  -.2067365E-01  -.2630769E-01
  -.3050185E-01  -.3322749E-01  -.3387705E-01  -.3173804E-01  -.2456467E-01
  -.1178295E-01   .3143530E-02   .1638458E-01   .2443362E-01   .2631583E-01
   .2534864E-01   .2497005E-01   .2599691E-01   .2690028E-01   .2640019E-01
   .2522865E-01   .2420324E-01   .2358265E-01   .2302323E-01   .2228610E-01
   .2183408E-01   .2150275E-01   .2176397E-01   .2382218E-01   .2750555E-01
   .3167149E-01   .3567364E-01   .3958390E-01   .4378549E-01   .4687841E-01
   .4518738E-01   .3685707E-01   .2513850E-01   .1435884E-01   .4792265E-02
  -.5375337E-02  -.1638896E-01  -.2616913E-01  -.3338006E-01  -.3866952E-01
  -.4305638E-01  -.4672450E-01  -.4919394E-01  -.5016498E-01  -.4912375E-01
  -.4593023E-01  -.4101385E-01  -.3483376E-01  -.2741492E-01  -.1879979E-01
  -.8265099E-02   .5009568E-02   .2026904E-01   .3601774E-01   .4851745E-01
   .5279403E-01   .4600660E-01   .3082239E-01   .1455896E-01   .2523290E-02
  -.3347705E-02  -.3406147E-02  -.3167933E-03   .3037874E-02   .5688750E-02
   .8289936E-02   .1189858E-01   .1605344E-01   .1875507E-01   .1847332E-01
   .1450340E-01   .8615742E-02   .3808444E-02   .1159298E-02  -.1112874E-03
  -.1023598E-02  -.2204458E-02  -.3690867E-02  -.4740150E-02  -.5136420E-02
  -.4915026E-02  -.4281965E-02  -.3609201E-02  -.2377251E-02   .9343592E-04
   .3208982E-02   .6005943E-02   .7388443E-02   .5108989E-02  -.1647596E-02
  -.1025045E-01  -.1721369E-01  -.2074903E-01  -.2068231E-01  -.1770915E-01
  -.1270068E-01  -.6754704E-02  -.1020103E-02   .4166043E-02   .8745748E-02
   .1315985E-01   .1747552E-01   .2071320E-01   .2228640E-01   .2170517E-01
   .1922946E-01   .1553318E-01   .1064622E-01   .4711627E-02  -.1354269E-02
  -.5980502E-02  -.8616684E-02  -.1011377E-01  -.1201847E-01  -.1622822E-01
  -.2336970E-01  -.3156627E-01  -.3755284E-01  -.3950412E-01  -.3708900E-01
  -.3021794E-01  -.2064228E-01  -.1067561E-01  -.1939709E-02   .4589011E-02
   .9154540E-02   .1092988E-01   .8950100E-02   .3573892E-02  -.3900597E-02
  -.1133984E-01  -.1719727E-01  -.2058246E-01  -.2146568E-01  -.2053374E-01
  -.1821441E-01  -.1409465E-01  -.7096867E-02   .2029573E-02   .1119031E-01
   .1888364E-01   .2381049E-01   .2545027E-01   .2254027E-01   .1408081E-01
   .2225865E-02  -.9483873E-02  -.1788034E-01  -.2157008E-01  -.2167071E-01
  -.2008340E-01  -.1798198E-01  -.1640201E-01  -.1688483E-01  -.2000195E-01
  -.2392973E-01  -.2627094E-01  -.2480036E-01  -.1681254E-01  -.2900289E-02
   .1065135E-01   .1768531E-01   .1825259E-01   .1595631E-01   .1298048E-01
   .9768929E-02   .5417730E-02  -.1681477E-02  -.1087140E-01  -.1930535E-01
  -.2522594E-01  -.2880342E-01  -.3079696E-01  -.3172194E-01  -.3144475E-01
  -.2838463E-01  -.2131593E-01  -.1217715E-01  -.3802841E-02   .1523551E-02
   .2947883E-02   .3003855E-02   .4504290E-02   .8787317E-02   .1578240E-01
   .2305508E-01   .2713223E-01   .2629223E-01   .2189568E-01   .1665428E-01
   .1231233E-01   .9791536E-02   .8967778E-02   .8318372E-02   .6683300E-02
   .2958256E-02  -.2323363E-02  -.6899789E-02  -.1025711E-01  -.1401583E-01
  -.2012620E-01  -.2815139E-01  -.3539378E-01  -.3894246E-01  -.3794932E-01
  -.3296989E-01  -.2312100E-01  -.8350059E-02   .8921003E-02   .2577711E-01
   .3938499E-01   .4818144E-01   .5341466E-01   .5600503E-01   .5533643E-01
   .5096843E-01   .4262874E-01   .3187649E-01   .2101037E-01   .1121455E-01
   .2926767E-02  -.3065268E-02  -.5366727E-02  -.3379405E-02   .2692475E-02
   .1059050E-01   .1611921E-01   .1747085E-01   .1602798E-01   .1437191E-01
   .1466055E-01   .1733681E-01   .2132303E-01   .2438552E-01   .2383460E-01
   .1784769E-01   .7290029E-02  -.4398106E-02  -.1370259E-01  -.1996817E-01
  -.2368418E-01  -.2475971E-01  -.2337397E-01  -.1982974E-01  -.1596104E-01
  -.1313262E-01  -.1032964E-01  -.6191179E-02  -.5658080E-03   .5105333E-02
   .9124843E-02   .1095216E-01   .1124552E-01   .1071897E-01   .8955162E-02
   .5551195E-02   .1243200E-02  -.2965216E-02  -.5960411E-02  -.6744781E-02
  -.5334132E-02  -.2589080E-02  -.6454626E-05   .1253850E-02   .1183666E-02
   .2916150E-03  -.7370769E-03  -.1319325E-02  -.1652258E-02  -.2260699E-02
  -.2796433E-02  -.2806398E-02  -.1897213E-02   .8986765E-03   .5818028E-02
   .1168211E-01   .1725713E-01   .2219395E-01   .2636854E-01   .2953054E-01
   .3170217E-01   .3292790E-01   .3255196E-01   .2841592E-01   .1826311E-01
   .4652422E-02  -.5708058E-02  -.9630281E-02  -.9246409E-02  -.7385004E-02
  -.4894777E-02  -.2289679E-02  -.7736524E-03  -.4783181E-03  -.7784531E-03
  -.7465661E-03   .3311303E-03   .1743129E-02   .2550110E-02   .2562560E-02
   .2045240E-02   .1524033E-02   .1004446E-02  -.1958058E-03  -.2454058E-02
  -.5566234E-02  -.8989110E-02  -.1179278E-01  -.1373501E-01  -.1570986E-01
  -.1787325E-01  -.1903252E-01  -.1744938E-01  -.1248269E-01  -.5487076E-02
   .8532956E-03   .4568602E-02   .4672324E-02   .1059014E-02  -.4374714E-02
  -.8671228E-02  -.9476527E-02  -.6565264E-02  -.9835700E-03   .5769490E-02
   .1186257E-01   .1590396E-01   .1722874E-01   .1642701E-01   .1438472E-01
   .1122393E-01   .7433334E-02   .3272037E-02  -.1745284E-02  -.8071697E-02
  -.1506989E-01  -.2146882E-01  -.2631277E-01  -.2861328E-01  -.2843489E-01
  -.2602888E-01  -.2138874E-01  -.1533319E-01  -.8489067E-02  -.1850298E-02
   .3131164E-02   .6509732E-02   .8837239E-02   .1041882E-01   .1141786E-01
   .1193961E-01   .1205677E-01   .1135151E-01   .9445805E-02   .6647471E-02
   .4396846E-02   .4652674E-02   .7327041E-02   .1010180E-01   .1147735E-01
   .1019874E-01   .6266232E-02   .1781970E-02  -.2085581E-02  -.4709884E-02
  -.5202338E-02  -.3212852E-02   .9912311E-03   .6254950E-02   .1095698E-01
   .1431679E-01   .1666279E-01   .1894986E-01   .2154674E-01   .2310293E-01
   .2199209E-01   .1750139E-01   .1058672E-01   .5016969E-02   .2627116E-02
   .1872731E-02   .1869529E-02   .2444586E-02   .3236304E-02   .3854071E-02
   .4307559E-02   .4307502E-02   .2823136E-02  -.5605832E-03  -.5266750E-02
  -.1064713E-01  -.1596110E-01  -.2111810E-01  -.2635842E-01  -.3086839E-01
  -.3329068E-01  -.3176898E-01  -.2593623E-01  -.1749744E-01  -.8498249E-02
  -.1523546E-02   .2546120E-02   .4553695E-02   .5180290E-02   .4990135E-02
   .4368797E-02   .3656397E-02   .2729717E-02   .1159188E-02  -.1375318E-02
  -.5045467E-02  -.9296486E-02  -.1238073E-01  -.1325103E-01  -.1218469E-01
  -.9792374E-02  -.6836615E-02  -.3487886E-02   .1086895E-02   .7008164E-02
   .1298338E-01   .1798583E-01   .2181192E-01   .2502941E-01   .2825291E-01
   .3158687E-01   .3416166E-01   .3460138E-01   .3204629E-01   .2618873E-01
   .1781785E-01   .8279711E-02  -.1638161E-02  -.1084854E-01  -.1838884E-01
  -.2390458E-01  -.2671521E-01  -.2711215E-01  -.2640515E-01  -.2511379E-01
  -.2289786E-01  -.1877689E-01  -.1184318E-01  -.3202335E-02   .5418062E-02
   .1225544E-01   .1536539E-01   .1496205E-01   .1198589E-01   .6650669E-02
   .9424880E-04  -.5958344E-02  -.1048479E-01  -.1289723E-01  -.1397960E-01
  -.1524755E-01  -.1681551E-01  -.1823474E-01  -.1898198E-01  -.1788491E-01
  -.1398645E-01  -.6925813E-02   .2523668E-02   .1239651E-01   .2112160E-01
   .2834568E-01   .3432859E-01   .3820093E-01   .3809921E-01   .3118095E-01
   .1715645E-01   .1414735E-02  -.1149067E-01  -.2199164E-01  -.3131839E-01
  -.3876431E-01  -.4331777E-01  -.4432102E-01  -.4200033E-01  -.3770747E-01
  -.3268733E-01  -.2718907E-01  -.2059378E-01  -.1269299E-01  -.4472052E-02
   .2576437E-02   .7083643E-02   .8878422E-02   .9249351E-02   .9421464E-02
   .1041841E-01   .1187929E-01   .1241745E-01   .1158919E-01   .8859248E-02
   .4878543E-02   .1651522E-02   .6970262E-03   .2387506E-02   .5489826E-02
   .8520654E-02   .1024576E-01   .1037669E-01   .9213322E-02   .6967089E-02
   .3877856E-02   .5507161E-03  -.1207419E-02  -.5869054E-03   .1925239E-02
   .4968216E-02   .6679964E-02   .6403946E-02   .3890435E-02   .2126496E-03
  -.2314829E-02  -.2444962E-02  -.2179362E-04   .3926020E-02   .7093894E-02
   .7978440E-02   .7007333E-02   .5386038E-02   .3693857E-02   .1333132E-02
  -.1949178E-02  -.5196252E-02  -.7392327E-02  -.8177914E-02  -.7104679E-02
  -.4488971E-02  -.2073092E-02  -.1361511E-02  -.2669695E-02  -.5305727E-02
  -.8689306E-02  -.1294943E-01  -.1831767E-01  -.2356439E-01  -.2604327E-01
  -.2464693E-01  -.2082036E-01  -.1651825E-01  -.1299332E-01  -.1071718E-01
  -.9356898E-02  -.8332068E-02  -.7372591E-02  -.5536148E-02  -.1241191E-02
   .5556016E-02   .1309178E-01   .1933406E-01   .2372819E-01   .2644037E-01
   .2647598E-01   .2317274E-01   .1739573E-01   .1087448E-01   .5447987E-02
   .2247159E-02   .9289851E-03   .6883424E-03   .9802168E-03   .9863199E-03
   .6238186E-03  -.3018509E-03  -.1974520E-02  -.3367156E-02  -.4200740E-02
  -.4686449E-02  -.5355311E-02  -.7642253E-02  -.1207885E-01  -.1788280E-01
  -.2312830E-01  -.2520765E-01  -.2309247E-01  -.1796174E-01  -.1149398E-01
  -.4852034E-02   .1220926E-02   .6552559E-02   .1166371E-01   .1692528E-01
   .2174039E-01   .2498867E-01   .2651827E-01   .2682521E-01   .2624971E-01
   .2556376E-01   .2524156E-01   .2481379E-01   .2410699E-01   .2304407E-01
   .2167520E-01   .2053719E-01   .1944161E-01   .1788628E-01   .1601520E-01
   .1421521E-01   .1241325E-01   .1009936E-01   .6479986E-02   .1103169E-02
  -.5419901E-02  -.1133720E-01  -.1439206E-01  -.1360703E-01  -.9784374E-02
  -.4081093E-02   .2136608E-02   .7654985E-02   .1237996E-01   .1664048E-01
   .2006140E-01   .2136740E-01   .1919151E-01   .1348714E-01   .6011430E-02
  -.8231083E-03  -.5124086E-02  -.6536842E-02  -.5587676E-02  -.2625735E-02
   .1169312E-02   .4256929E-02   .6393442E-02   .7152814E-02   .6207911E-02
   .4572162E-02   .3496761E-02   .4107621E-02   .6724401E-02   .1050689E-01
   .1397775E-01   .1587488E-01   .1512931E-01   .1147166E-01   .6273745E-02
   .1235145E-02  -.2169526E-02  -.2722632E-02  -.9339015E-03   .1757506E-02
   .4143613E-02   .5250335E-02   .4879935E-02   .3672069E-02   .3149521E-02
   .3737822E-02   .4354559E-02   .4230290E-02   .2732474E-02  -.2026145E-03
  -.3040675E-02  -.3718852E-02  -.1074365E-02   .4419826E-02   .1108616E-01
   .1643987E-01   .1843685E-01   .1718284E-01   .1399340E-01   .1010060E-01
   .5996392E-02   .2016532E-02  -.1915078E-02  -.5834200E-02  -.8929062E-02
  -.1070261E-01  -.1085454E-01  -.9114818E-02  -.5500245E-02  -.9214381E-03
   .2826538E-02   .4491226E-02   .3775022E-02   .1533669E-02  -.9245378E-03
  -.3191709E-02  -.5038453E-02  -.6250411E-02  -.6954308E-02  -.7397093E-02
  -.7737227E-02  -.7182882E-02  -.5256512E-02  -.2432269E-02   .9787416E-03
   .4360829E-02   .7542070E-02   .1040107E-01   .1243162E-01   .1308179E-01
   .1116060E-01   .6512716E-02  -.6220354E-03  -.9588147E-02  -.1775263E-01
  -.2297381E-01  -.2514328E-01  -.2521185E-01  -.2370808E-01  -.2070920E-01
  -.1682337E-01  -.1231075E-01  -.6780924E-02  -.3720926E-03   .6420591E-02
   .1281095E-01   .1779489E-01   .2099934E-01   .2269147E-01   .2273131E-01
   .2132504E-01   .1958940E-01   .1819169E-01   .1725232E-01   .1609657E-01
   .1421425E-01   .1136879E-01   .7563258E-02   .3640604E-02   .2857023E-03
  -.1917949E-02  -.2727778E-02  -.2716227E-02  -.2424146E-02  -.1724222E-02
  -.5397652E-03   .5810040E-03   .1154091E-02   .9779017E-03   .2541349E-03
  -.2364343E-03  -.6236402E-03  -.1153355E-02  -.1408341E-02  -.1292628E-02
  -.2503186E-03   .2032609E-02   .4922091E-02   .7641525E-02   .9627554E-02
   .1089568E-01   .1186328E-01   .1274976E-01   .1359403E-01   .1425092E-01
   .1408499E-01   .1232844E-01   .8830153E-02   .4515513E-02   .1103028E-02
  -.3598810E-03  -.3599506E-03  -.3575038E-05   .7210978E-04  -.1124406E-03
  -.6396679E-03  -.1738853E-02  -.2738348E-02  -.2563764E-02  -.9571249E-03
   .1988364E-02   .5830289E-02   .9719869E-02   .1275432E-01   .1367785E-01
   .1211972E-01   .8908880E-02   .5170217E-02   .1295915E-02  -.3090571E-02
  -.7963229E-02  -.1313053E-01  -.1804412E-01  -.2166318E-01  -.2297318E-01
  -.2171387E-01  -.1819062E-01  -.1305253E-01  -.7720193E-02  -.2907067E-02
   .1051734E-02   .3896902E-02   .5817873E-02   .6791669E-02   .7031411E-02
   .6370617E-02   .4579566E-02   .2277355E-02   .1441924E-03  -.1113420E-02
  -.8213441E-03   .7823621E-03   .2820500E-02   .4207287E-02   .4407273E-02
   .3380666E-02   .1416726E-02  -.1038099E-02  -.4067434E-02  -.7539175E-02
  -.1028316E-01  -.1133763E-01  -.1108436E-01  -.1007589E-01  -.8585088E-02
  -.6695191E-02  -.4477490E-02  -.2197378E-02  -.2000906E-03   .1599162E-02
   .3537137E-02   .5683506E-02   .8094240E-02   .1014011E-01   .1072451E-01
   .9520081E-02   .7039326E-02   .4063151E-02   .8841670E-03  -.2182078E-02
  -.4793674E-02  -.6783935E-02  -.7937263E-02  -.8754396E-02  -.9692241E-02
  -.1073982E-01  -.1155806E-01  -.1168262E-01  -.1077460E-01  -.8883193E-02
  -.6808130E-02  -.5067542E-02  -.3994964E-02  -.3492840E-02  -.2786623E-02
  -.1581812E-02  -.4477860E-03  -.1311639E-03  -.5974833E-03  -.1881191E-02
  -.4161881E-02  -.6592386E-02  -.7798864E-02  -.7434469E-02  -.6368664E-02
  -.5146084E-02  -.3824223E-02  -.2443049E-02  -.7310958E-03   .1010913E-02
   .2160972E-02   .3084606E-02   .4072104E-02   .4641581E-02   .4290267E-02
   .2641122E-02  -.3548361E-03  -.4061246E-02  -.7191009E-02  -.9229416E-02
  -.1072771E-01  -.1183232E-01  -.1274406E-01  -.1324383E-01  -.1250436E-01
  -.1076607E-01  -.8788559E-02  -.7046294E-02  -.5796553E-02  -.4879931E-02
  -.3850377E-02  -.2380323E-02  -.3708302E-03   .2222833E-02   .4812715E-02
   .6506804E-02   .6899450E-02   .5848549E-02   .3503681E-02   .6692767E-03
  -.1568040E-02  -.2980249E-02  -.3681775E-02  -.3748302E-02  -.3673512E-02
  -.3889310E-02  -.4459637E-02  -.4916827E-02  -.4994588E-02  -.4693529E-02
  -.4109187E-02  -.3832984E-02  -.3907895E-02  -.3948773E-02  -.3389194E-02
  -.1743217E-02   .5595270E-03   .2850176E-02   .4673627E-02   .6026291E-02
   .7325018E-02   .8564164E-02   .9348616E-02   .9707118E-02   .9638076E-02
   .8853767E-02   .7472502E-02   .5332772E-02   .2156257E-02  -.9585757E-03
  -.3329243E-02  -.5727377E-02  -.9010830E-02  -.1328388E-01  -.1750091E-01
  -.2059032E-01  -.2147906E-01  -.1980117E-01  -.1638724E-01  -.1203818E-01
  -.7265723E-02  -.2217385E-02   .3148775E-02   .8851036E-02   .1435819E-01
   .1861578E-01   .2060766E-01   .2009400E-01   .1776196E-01   .1434232E-01
   .1033301E-01   .5990773E-02   .1468939E-02  -.3139914E-02  -.7520383E-02
  -.1119627E-01  -.1376616E-01  -.1502073E-01  -.1499658E-01  -.1396787E-01
  -.1227181E-01  -.1003353E-01  -.7580193E-02  -.5285127E-02  -.3143452E-02
  -.9542713E-03   .9164918E-03   .1994991E-02   .2199471E-02   .1284094E-02
  -.8355682E-03  -.3724969E-02  -.6375281E-02  -.7663320E-02  -.7310931E-02
  -.5379814E-02  -.2189725E-02   .8283108E-03   .2604611E-02   .3296068E-02
   .3640722E-02   .4575895E-02   .6039657E-02   .7668168E-02   .9415363E-02
   .1166454E-01   .1511716E-01   .1932045E-01   .2311947E-01   .2510184E-01
   .2427013E-01   .2056565E-01   .1470410E-01   .7949260E-02   .1722157E-02
  -.3063607E-02  -.6439692E-02  -.8717267E-02  -.1054562E-01  -.1217420E-01
  -.1346220E-01  -.1414826E-01  -.1402355E-01  -.1344194E-01  -.1246234E-01
  -.1135649E-01  -.1034180E-01  -.9208879E-02  -.7901121E-02  -.6320083E-02
  -.4848068E-02  -.3632047E-02  -.2345471E-02  -.1603793E-02  -.1892238E-02
  -.2991068E-02  -.4592062E-02  -.5893956E-02  -.6603261E-02  -.7273949E-02
  -.8105374E-02  -.9140153E-02  -.1071838E-01  -.1254517E-01  -.1442430E-01
  -.1614873E-01  -.1695870E-01  -.1680381E-01  -.1577014E-01  -.1382327E-01
  -.1099996E-01  -.7522495E-02  -.4013235E-02  -.1136870E-02   .7446593E-03
   .1988763E-02   .3364980E-02   .5170963E-02   .7303296E-02   .9466678E-02
   .1115154E-01   .1207296E-01   .1245009E-01   .1260046E-01   .1254235E-01
   .1212984E-01   .1104504E-01   .9004424E-02   .5767138E-02   .1390291E-02
  -.3349629E-02  -.7710023E-02  -.1149063E-01  -.1462315E-01  -.1689530E-01
  -.1818175E-01  -.1848290E-01  -.1714852E-01  -.1395717E-01  -.9699624E-02
  -.4901180E-02  -.2194738E-03   .3930127E-02   .7382757E-02   .9066202E-02
   .7992078E-02   .4423387E-02  -.3197148E-03  -.4582679E-02  -.7225002E-02
  -.8318104E-02  -.8629100E-02  -.8429514E-02  -.7701735E-02  -.6566318E-02
  -.5333491E-02  -.3915762E-02  -.2220425E-02  -.5080744E-03   .1817268E-02
   .4923830E-02   .8502359E-02   .1201549E-01   .1428074E-01   .1436014E-01
   .1179243E-01   .7040285E-02   .9960577E-03  -.4756177E-02  -.9134519E-02
  -.1178076E-01  -.1231872E-01  -.1106848E-01  -.8184027E-02  -.3977786E-02
   .2893550E-03   .3683849E-02   .6216310E-02   .7953506E-02   .8967061E-02
   .9083744E-02   .8215508E-02   .6254771E-02   .3126448E-02  -.5765952E-03
  -.4562966E-02  -.8902496E-02  -.1304557E-01  -.1611333E-01  -.1780761E-01
  -.1809404E-01  -.1716473E-01  -.1522771E-01  -.1250454E-01  -.9838541E-02
  -.7612573E-02  -.5711332E-02  -.4095524E-02  -.2847171E-02  -.2344333E-02
  -.2694553E-02  -.3763484E-02  -.5018946E-02  -.5712049E-02  -.6094267E-02
  -.6552639E-02  -.7322771E-02  -.8380361E-02  -.9104447E-02  -.9476074E-02
  -.9538296E-02  -.9225222E-02  -.8622135E-02  -.7668801E-02  -.6298189E-02
  -.4471819E-02  -.1883586E-02   .1510702E-02   .5034344E-02   .7835633E-02
   .9038681E-02   .7986498E-02   .4892733E-02   .9138456E-03  -.2391691E-02
  -.4314225E-02  -.4962027E-02  -.4708098E-02  -.4045535E-02  -.2964673E-02
  -.1835543E-02  -.8502120E-03   .1692086E-03   .9697010E-03   .1728742E-02
   .2294766E-02   .2011042E-02   .1248606E-02   .3551351E-03  -.1348460E-02
  -.4071659E-02  -.7078472E-02  -.9780203E-02  -.1176436E-01  -.1270328E-01
  -.1279527E-01  -.1222269E-01  -.1116864E-01  -.1011086E-01  -.8841185E-02
  -.6882829E-02  -.4657068E-02  -.2743943E-02  -.1551485E-02  -.9333467E-03
  -.4118762E-03  -.3670135E-04   .4348171E-03   .1188719E-02   .2163778E-02
   .3117319E-02   .3415199E-02   .2535438E-02   .2151325E-03  -.2745236E-02
  -.5624911E-02  -.8132966E-02  -.9719841E-02  -.1101770E-01  -.1276450E-01
  -.1485007E-01  -.1714201E-01  -.1861755E-01  -.1846961E-01  -.1696749E-01
  -.1453820E-01  -.1179241E-01  -.8580375E-02  -.5145316E-02  -.2166493E-02
   .3689606E-03   .1890794E-02   .2391787E-02   .2976784E-02   .3942075E-02
   .4669250E-02   .4446967E-02   .2934824E-02   .7329217E-04  -.3573721E-02
  -.7184605E-02  -.1097744E-01  -.1460656E-01  -.1713809E-01  -.1840010E-01
  -.1822557E-01  -.1713755E-01  -.1600506E-01  -.1472864E-01  -.1293121E-01
  -.1035784E-01  -.7457910E-02  -.5137793E-02  -.3279974E-02  -.1779844E-02
  -.6418220E-03   .6321263E-03   .1972898E-02   .3421674E-02   .5064556E-02
   .6447441E-02   .7491181E-02   .8301173E-02   .8682444E-02   .8457196E-02
   .7672455E-02   .6132238E-02   .3782965E-02   .1362275E-02  -.6589999E-03
  -.2043860E-02  -.3296858E-02  -.5053832E-02  -.6673886E-02  -.7126789E-02
  -.6035033E-02  -.4384848E-02  -.2717397E-02  -.8687287E-03   .6331223E-03
   .1689022E-02   .2757065E-02   .3558701E-02   .3822237E-02   .3729304E-02
   .3144632E-02   .1948622E-02   .5834310E-03  -.3955110E-03  -.1468387E-02
  -.3761425E-02  -.7634265E-02  -.1227320E-01  -.1643023E-01  -.1936737E-01
  -.2086170E-01  -.2113725E-01  -.2039074E-01  -.1869716E-01  -.1643056E-01
  -.1372021E-01  -.1096184E-01  -.8718942E-02  -.6934192E-02  -.5312772E-02
  -.3820914E-02  -.2578245E-02  -.1464386E-02  -.7841368E-03  -.6758078E-03
  -.6361406E-03  -.6283801E-03  -.6685828E-03  -.8102654E-03  -.1286775E-02
  -.2165749E-02  -.3727901E-02  -.6071516E-02  -.8449980E-02  -.9901867E-02
  -.1010185E-01  -.9344733E-02  -.7848597E-02  -.6045800E-02  -.4408258E-02
  -.3139690E-02  -.2369651E-02  -.2096790E-02  -.2370713E-02  -.2884943E-02
  -.3438863E-02  -.3926974E-02  -.4258419E-02  -.4169668E-02  -.3219483E-02
  -.1741993E-02  -.8189543E-03  -.9717117E-03  -.1615646E-02  -.2098223E-02
  -.2229561E-02  -.2338726E-02  -.2364542E-02  -.1731980E-02  -.6775479E-03
   .1016880E-02   .3763901E-02   .6729951E-02   .9363623E-02   .1128648E-01
   .1215557E-01   .1216526E-01   .1127578E-01   .9140031E-02   .5812508E-02
   .2276090E-02  -.4103895E-03  -.2075100E-02  -.3011196E-02  -.3496424E-02
  -.3310313E-02  -.1970305E-02   .7706282E-03   .4550249E-02   .8071435E-02
   .1056613E-01   .1224748E-01   .1303397E-01   .1272610E-01   .1182311E-01
   .1032375E-01   .8183738E-02   .6330799E-02   .4515544E-02   .2070613E-02
  -.1050554E-02  -.4510157E-02  -.7260621E-02  -.8774503E-02  -.9221171E-02
  -.9151170E-02  -.8942335E-02  -.8495562E-02  -.7509295E-02  -.5765796E-02
  -.3786052E-02  -.2178049E-02  -.9884332E-03  -.1644860E-03   .5766307E-03
   .1280575E-02   .1387614E-02   .7268488E-03  -.1934710E-03  -.7206475E-03
  -.3652496E-03   .7837465E-03   .1954377E-02   .2957244E-02   .3914055E-02
   .4497732E-02   .4603479E-02   .4272522E-02   .3835479E-02   .3478995E-02
   .2921508E-02   .1791841E-02  -.3112058E-04  -.1936734E-02  -.3258906E-02
  -.3771801E-02  -.3374415E-02  -.2554349E-02  -.1962449E-02  -.1415507E-02
  -.1082104E-02  -.1261760E-02  -.1727869E-02  -.2223804E-02  -.2189069E-02
  -.1371242E-02   .8454205E-04   .1824245E-02   .3251360E-02   .3825801E-02
   .3324394E-02   .1993249E-02   .3844186E-03  -.9237355E-03  -.1914212E-02
  -.2628159E-02  -.2839482E-02  -.2580697E-02  -.1973133E-02  -.1138882E-02
  -.2976922E-03   .6245988E-03   .1909305E-02   .3907660E-02   .6491805E-02
   .8706118E-02   .1005558E-01   .1069504E-01   .1079116E-01   .1057780E-01
   .1009378E-01   .9180945E-02   .8044857E-02   .6496768E-02   .4616805E-02
   .3051547E-02   .1492280E-02  -.1710323E-03  -.1479677E-02  -.2398666E-02
  -.2847889E-02  -.2835142E-02  -.3024624E-02  -.3664248E-02  -.4468612E-02
  -.5291071E-02  -.5463984E-02  -.4578456E-02  -.3162215E-02  -.1670280E-02
  -.3320373E-03   .9354212E-03   .2609800E-02   .4619952E-02   .6670566E-02
   .8529476E-02   .9666439E-02   .1015195E-01   .1017384E-01   .9608698E-02
   .8567675E-02   .7062441E-02   .5288256E-02   .3793530E-02   .2777282E-02
   .2501362E-02   .2875322E-02   .3034401E-02   .3028163E-02   .3260242E-02
   .3720001E-02   .4420605E-02   .4889285E-02   .4896355E-02   .4513014E-02
   .3444189E-02   .1382851E-02  -.1491049E-02  -.4365748E-02  -.6737284E-02
  -.8432087E-02  -.9403090E-02  -.9626060E-02  -.8684617E-02  -.6731005E-02
  -.4174652E-02  -.8053004E-03   .3212862E-02   .7029819E-02   .1003655E-01
   .1204575E-01   .1304917E-01   .1337180E-01   .1314593E-01   .1230387E-01
   .1080458E-01   .8438917E-02   .5190896E-02   .1518005E-02  -.2199406E-02
  -.5731644E-02  -.8408661E-02  -.9862364E-02  -.1003260E-01  -.8930505E-02
  -.6947787E-02  -.4523530E-02  -.2137608E-02  -.2101499E-03   .1170501E-02
   .2383753E-02   .3890617E-02   .5469399E-02   .6615589E-02   .7145533E-02
   .6957193E-02   .5995855E-02   .4360169E-02   .2121877E-02  -.6759791E-04
  -.1313108E-02  -.2031707E-02  -.2629967E-02  -.2810642E-02  -.2258485E-02
  -.1178738E-02  -.3183389E-03   .4156328E-03   .1081879E-02   .1452369E-02
   .1870381E-02   .2294874E-02   .2430159E-02   .2527238E-02   .2615883E-02
   .2664168E-02   .2820467E-02   .2714233E-02   .2228758E-02   .1559219E-02
   .8436373E-03   .3032883E-03   .9719540E-04   .5060489E-03   .1245785E-02
   .1773503E-02   .2041520E-02   .2170161E-02   .2270517E-02   .2581460E-02
   .3369846E-02   .4381915E-02   .5132705E-02   .5255475E-02   .4610341E-02
   .3691317E-02   .2899539E-02   .2169780E-02   .1786978E-02   .2015166E-02
   .2956360E-02   .4549344E-02   .6148462E-02   .7427332E-02   .8614154E-02
   .9611097E-02   .1014889E-01   .1023992E-01   .9707817E-02   .8668093E-02
   .7476228E-02   .6029164E-02   .4668634E-02   .3722562E-02   .3103108E-02
   .2900996E-02   .2924429E-02   .3031648E-02   .4042230E-02   .6341028E-02
   .9282923E-02   .1225770E-01   .1440096E-01   .1550098E-01   .1608908E-01
   .1622680E-01   .1589912E-01   .1514673E-01   .1419749E-01   .1304200E-01
   .1139908E-01   .9300482E-02   .7093789E-02   .5363519E-02   .4292489E-02
   .3548268E-02   .2850359E-02   .1988543E-02   .8040865E-03  -.4258686E-03
  -.1875832E-02  -.3506929E-02  -.4681391E-02  -.5378968E-02  -.5452544E-02
  -.4649494E-02  -.3141572E-02  -.1167968E-02   .1150064E-02   .3143919E-02
   .3944196E-02   .3809860E-02   .3518774E-02   .3326044E-02   .2855917E-02
   .1799795E-02   .2206815E-04  -.2102935E-02  -.3179169E-02  -.2539701E-02
  -.2553538E-03   .2905348E-02   .5398978E-02   .6486445E-02   .6380735E-02
   .6031044E-02   .5920811E-02   .5906038E-02   .5873982E-02   .5475413E-02
   .4557424E-02   .3220535E-02   .1479999E-02  -.1729047E-03  -.1396513E-02
  -.2315044E-02  -.2573598E-02  -.2228540E-02  -.1416921E-02   .5735542E-03
   .4161863E-02   .8543682E-02   .1250046E-01   .1477252E-01   .1515282E-01
   .1465312E-01   .1389824E-01   .1349035E-01   .1349664E-01   .1369378E-01
   .1405983E-01   .1388525E-01   .1292797E-01   .1195436E-01   .1140794E-01
   .1108350E-01   .1049307E-01   .9304355E-02   .7751973E-02   .6266430E-02
   .5294363E-02   .5232872E-02   .5685534E-02   .6260263E-02   .6874003E-02
   .7193800E-02   .7516378E-02   .8131006E-02   .9093659E-02   .1064694E-01
   .1248009E-01   .1401652E-01   .1495371E-01   .1527005E-01   .1458193E-01
   .1281791E-01   .1069332E-01   .8649789E-02   .7077964E-02   .6040811E-02
   .5408054E-02   .5430692E-02   .5961105E-02   .6527468E-02   .7473244E-02
   .8848554E-02   .9900550E-02   .1048773E-01   .1060148E-01   .1010764E-01
   .8996111E-02   .7601912E-02   .6214468E-02   .4800514E-02   .3281142E-02
   .1685719E-02   .8064648E-03   .1042074E-02   .1943562E-02   .3073653E-02
   .4244446E-02   .5318226E-02   .5890485E-02   .6315395E-02   .6932116E-02
   .7547851E-02   .7924554E-02   .7672121E-02   .7216588E-02   .6989144E-02
   .7358366E-02   .8617450E-02   .1038635E-01   .1237881E-01   .1395490E-01
   .1443847E-01   .1414624E-01   .1330707E-01   .1202901E-01   .1080096E-01
   .9247060E-02   .7322348E-02   .5359243E-02   .3651587E-02   .2459345E-02
   .1612385E-02   .1380099E-02   .1697752E-02   .2203750E-02   .2841977E-02
   .3347850E-02   .3774614E-02   .4107209E-02   .3897028E-02   .3652222E-02
   .3512821E-02   .3551683E-02   .4055607E-02   .4445069E-02   .4419231E-02
   .4220107E-02   .4505372E-02   .5612840E-02   .7273324E-02   .9204175E-02
   .1113323E-01   .1286498E-01   .1442936E-01   .1552997E-01   .1596614E-01
   .1604440E-01   .1566929E-01   .1473891E-01   .1328338E-01   .1125622E-01
   .8836139E-02   .6304064E-02   .4138660E-02   .2362422E-02   .1024264E-02
   .5927690E-03   .1021226E-02   .1785599E-02   .2774230E-02   .4227992E-02
   .6136732E-02   .8647953E-02   .1151946E-01   .1435894E-01   .1714915E-01
   .1914275E-01   .1966625E-01   .1901699E-01   .1773611E-01   .1602195E-01
   .1398234E-01   .1219942E-01   .1092548E-01   .1030497E-01   .1054913E-01
   .1131539E-01   .1222659E-01   .1312700E-01   .1362176E-01   .1340757E-01
   .1269702E-01   .1168257E-01   .1073581E-01   .1017210E-01   .9963787E-02
   .1005081E-01   .9908395E-02   .8977087E-02   .7407022E-02   .5416579E-02
   .3197681E-02   .1249412E-02  -.2122338E-03  -.1054793E-02  -.1401737E-02
  -.1579544E-02  -.1766610E-02  -.2004147E-02  -.1900453E-02  -.1113033E-02
   .6272658E-04   .1103876E-02   .2017578E-02   .2792059E-02   .3792274E-02
   .5237682E-02   .6522289E-02   .7524698E-02   .7734195E-02   .6972120E-02
   .5851235E-02   .4260059E-02   .2208571E-02   .4185252E-04  -.1711510E-02
  -.2920537E-02  -.3718621E-02  -.4069114E-02  -.4024867E-02  -.3695644E-02
  -.3673164E-02  -.4230538E-02  -.5001978E-02  -.5269052E-02  -.4540350E-02
  -.3106375E-02  -.1253055E-02   .6790244E-03   .1937877E-02   .2359349E-02
   .2068359E-02   .1012939E-02  -.5526058E-03  -.2185609E-02  -.3533589E-02
  -.4292990E-02  -.3800690E-02  -.2072073E-02  -.3639518E-03   .6016693E-03
   .7822588E-03   .2343066E-03  -.8048950E-03  -.2534619E-02  -.4813119E-02
  -.6823275E-02  -.8242408E-02  -.9474930E-02  -.1066990E-01  -.1148671E-01
  -.1149412E-01  -.1075648E-01  -.9597692E-02  -.7851537E-02  -.5586408E-02
  -.2791138E-02   .7955233E-03   .4499596E-02   .7652964E-02   .1014807E-01
   .1202977E-01   .1337612E-01   .1355067E-01   .1269081E-01   .1150277E-01
   .1012274E-01   .9018186E-02   .8194534E-02   .7188156E-02   .5914682E-02
   .4261839E-02   .2116440E-02  -.1235393E-03  -.1799805E-02  -.2827633E-02
  -.3424712E-02  -.3903578E-02  -.4758907E-02  -.5942780E-02  -.7007931E-02
  -.7602484E-02  -.7342154E-02  -.6356216E-02  -.5360906E-02  -.4765286E-02
  -.4662712E-02  -.4786947E-02  -.4946788E-02  -.5425857E-02  -.6349415E-02
  -.7678034E-02  -.9591917E-02  -.1176931E-01  -.1349541E-01  -.1466296E-01
  -.1506589E-01  -.1455675E-01  -.1377604E-01  -.1288492E-01  -.1168755E-01
  -.1072056E-01  -.1023457E-01  -.9775635E-02  -.9281612E-02  -.8968456E-02
  -.8805577E-02  -.8937980E-02  -.9320962E-02  -.9937209E-02  -.1065697E-01
  -.1136664E-01  -.1215022E-01  -.1283068E-01  -.1358633E-01  -.1426274E-01
  -.1433972E-01  -.1384988E-01  -.1316024E-01  -.1239636E-01  -.1132955E-01
  -.9774967E-02  -.7755939E-02  -.5434923E-02  -.3206950E-02  -.1572301E-02
  -.8369998E-03  -.7636971E-03  -.1195991E-02  -.2173982E-02  -.3439688E-02
  -.5311282E-02  -.8041542E-02  -.1129661E-01  -.1475657E-01  -.1776721E-01
  -.1985796E-01  -.2090056E-01  -.2048684E-01  -.1869643E-01  -.1571316E-01
  -.1141585E-01  -.6793483E-02  -.2441612E-02   .1761637E-02   .5408412E-02
   .8562268E-02   .1080997E-01   .1134309E-01   .1006604E-01   .7293392E-02
   .3773001E-02   .2783126E-03  -.2465014E-02  -.4306384E-02  -.5862908E-02
  -.7239852E-02  -.7927493E-02  -.8031617E-02  -.7875110E-02  -.7266448E-02
  -.6585553E-02  -.5961599E-02  -.5425840E-02  -.5369267E-02  -.5725561E-02
  -.6312503E-02  -.6364223E-02  -.5773911E-02  -.5433132E-02  -.5722453E-02
  -.7090498E-02  -.9512232E-02  -.1146795E-01  -.1239920E-01  -.1285236E-01
  -.1255069E-01  -.1186533E-01  -.1162526E-01  -.1181103E-01  -.1220709E-01
  -.1251290E-01  -.1240890E-01  -.1211065E-01  -.1185387E-01  -.1184832E-01
  -.1213588E-01  -.1215021E-01  -.1172911E-01  -.1129309E-01  -.1084618E-01
  -.1013869E-01  -.9434816E-02  -.8769434E-02  -.7893024E-02  -.6991483E-02
  -.6461122E-02  -.6323958E-02  -.6583325E-02  -.7491589E-02  -.9166245E-02
  -.1130336E-01  -.1319027E-01  -.1470356E-01  -.1582706E-01  -.1615787E-01
  -.1573674E-01  -.1470355E-01  -.1324885E-01  -.1165629E-01  -.1046366E-01
  -.9840810E-02  -.9522832E-02  -.9855656E-02  -.1059260E-01  -.1098726E-01
  -.1104924E-01  -.1132523E-01  -.1141406E-01  -.1095796E-01  -.1062689E-01
  -.1027206E-01  -.9568199E-02  -.9014750E-02  -.9070247E-02  -.9626797E-02
  -.1068279E-01  -.1239107E-01  -.1443892E-01  -.1633798E-01  -.1769925E-01
  -.1836018E-01  -.1901516E-01  -.1964921E-01  -.1955025E-01  -.1901840E-01
  -.1819423E-01  -.1696190E-01  -.1539216E-01  -.1348702E-01  -.1110230E-01
  -.8616990E-02  -.6309623E-02  -.4335507E-02  -.3089934E-02  -.2551881E-02
  -.2465739E-02  -.2606018E-02  -.3309357E-02  -.4437569E-02  -.5644105E-02
  -.7263278E-02  -.8858142E-02  -.1020821E-01  -.1159068E-01  -.1260252E-01
  -.1326020E-01  -.1338362E-01  -.1273294E-01  -.1178132E-01  -.1088696E-01
  -.1035377E-01  -.1040102E-01  -.1099429E-01  -.1168331E-01  -.1203114E-01
  -.1212198E-01  -.1214955E-01  -.1225986E-01  -.1227281E-01  -.1230941E-01
  -.1271054E-01  -.1271502E-01  -.1219384E-01  -.1178620E-01  -.1129204E-01
  -.1111257E-01  -.1114176E-01  -.1081677E-01  -.1055537E-01  -.1015020E-01
  -.9288602E-02  -.8350496E-02  -.7570104E-02  -.6918475E-02  -.6551472E-02
  -.6593746E-02  -.6585939E-02  -.6600915E-02  -.6975181E-02  -.6992353E-02
  -.6592022E-02  -.6404716E-02  -.6172371E-02  -.5807029E-02  -.5573299E-02
  -.5496465E-02  -.5847116E-02  -.6244620E-02  -.6361255E-02  -.6528369E-02
  -.6665081E-02  -.6940632E-02  -.7172903E-02  -.7033091E-02  -.7188139E-02
  -.7629624E-02  -.8333555E-02  -.9711888E-02  -.1107526E-01  -.1208677E-01
  -.1294677E-01  -.1351443E-01  -.1375758E-01  -.1328283E-01  -.1216299E-01
  -.1082651E-01  -.9134618E-02  -.7774670E-02  -.7063929E-02  -.6644323E-02
  -.6821718E-02  -.7335563E-02  -.7529056E-02  -.7006020E-02  -.5741513E-02
  -.3935870E-02  -.1779348E-02  -.9472867E-04   .2477955E-03  -.3739753E-03
  -.1493411E-02  -.3059962E-02  -.4501153E-02  -.5766785E-02  -.6969169E-02
  -.8181787E-02  -.9371784E-02  -.1022692E-01  -.1115419E-01  -.1203863E-01
  -.1238273E-01  -.1247828E-01  -.1254238E-01  -.1242421E-01  -.1206652E-01
  -.1174652E-01  -.1121051E-01  -.1021430E-01  -.8933534E-02  -.7485891E-02
  -.6196474E-02  -.4992355E-02  -.3994305E-02  -.3369463E-02  -.2874013E-02
  -.2447772E-02  -.2191065E-02  -.1931984E-02  -.1814001E-02  -.1968204E-02
  -.1801971E-02  -.1368601E-02  -.9019754E-03  -.3940985E-03  -.1245591E-03
  -.1301045E-03  -.1083730E-03   .4995279E-04   .2689729E-03   .9454682E-03
   .1613303E-02   .1880614E-02   .1862585E-02   .1344979E-02   .8839667E-03
   .6777700E-03   .7246636E-03   .9537046E-03   .1169103E-02   .1092421E-02
   .4026955E-03  -.1720980E-03  -.4124493E-03  -.6112171E-03  -.3604975E-03
   .5440124E-04   .4100477E-03   .8311763E-03   .7318911E-03   .1896561E-03
  -.2949630E-03  -.6651203E-03  -.8655249E-03  -.1123999E-02  -.1463842E-02
  -.1597978E-02  -.1581311E-02  -.1476803E-02  -.1145825E-02  -.9313014E-03
  -.1114847E-02  -.1439257E-02  -.1848948E-02  -.2118263E-02  -.1955758E-02
  -.1573588E-02  -.9778713E-03  -.2197978E-03   .4781808E-03   .1346592E-02
   .2590123E-02   .3674553E-02   .4115293E-02   .3789247E-02   .2736004E-02
   .1562213E-02  -.9203450E-04  -.2101748E-02  -.3508415E-02  -.4535621E-02
  -.5353428E-02  -.5532884E-02  -.4516229E-02  -.2262777E-02   .4398611E-03
   .2841572E-02   .4470558E-02   .5238773E-02   .5530669E-02   .5520934E-02
   .5001746E-02   .3904950E-02   .2412037E-02   .4456238E-03  -.1721301E-02
  -.3490490E-02  -.4637993E-02  -.5288372E-02  -.5400880E-02  -.4794931E-02
  -.3794714E-02  -.2394029E-02  -.6755912E-03   .4618607E-03   .7449997E-03
   .4788604E-03  -.8224385E-04  -.4098877E-03  -.2103695E-03   .3155058E-03
   .7735011E-03   .1069812E-02   .1256206E-02   .1218206E-02   .1265064E-02
   .1464622E-02   .1373209E-02   .1266736E-02   .1370612E-02   .1245117E-02
   .5837599E-03  -.2242536E-03  -.6191215E-03  -.7838668E-03  -.8754822E-03
  -.8601293E-03  -.1263325E-02  -.1589098E-02  -.1153957E-02  -.5031618E-03
   .3839945E-03   .1479821E-02   .2799234E-02   .4394420E-02   .5945121E-02
   .7088875E-02   .7387487E-02   .7097739E-02   .6470099E-02   .5580190E-02
   .4580161E-02   .3398502E-02   .2465350E-02   .1902502E-02   .1134185E-02
   .3923490E-03  -.2267936E-03  -.7707489E-03  -.9088093E-03  -.7221894E-03
  -.3498090E-03   .1537706E-03   .8158180E-03   .1282464E-02   .1550395E-02
   .2052590E-02   .2779316E-02   .3634602E-02   .4284318E-02   .4785411E-02
   .5746652E-02   .6774501E-02   .7527030E-02   .7789008E-02   .7665659E-02
   .7887364E-02   .8029994E-02   .8164175E-02   .8434228E-02   .8390692E-02
   .8201976E-02   .7826669E-02   .7221556E-02   .6455304E-02   .5436739E-02
   .4302285E-02   .2832556E-02   .1436611E-02   .3623904E-03  -.8760177E-03
  -.1938889E-02  -.2632709E-02  -.2716476E-02  -.1961979E-02  -.6783592E-03
   .5620245E-03   .1357336E-02   .1603474E-02   .1056609E-02   .1839138E-03
  -.2263971E-03  -.3712881E-03  -.3639087E-03   .6236790E-04   .8188335E-03
   .2022413E-02   .3371247E-02   .4007774E-02   .4142513E-02   .3867467E-02
   .3049641E-02   .2723396E-02   .3015079E-02   .3370924E-02   .3844519E-02
   .4422684E-02   .4890926E-02   .5413331E-02   .6417555E-02   .7605588E-02
   .8709660E-02   .9498572E-02   .9467194E-02   .8851808E-02   .8088958E-02
   .7612441E-02   .7649989E-02   .7668360E-02   .7545147E-02   .7397047E-02
   .6987838E-02   .6675704E-02   .6798647E-02   .7069962E-02   .7364322E-02
   .7408116E-02   .7094634E-02   .6961558E-02   .7448082E-02   .8137149E-02
   .8705978E-02   .9270564E-02   .9466672E-02   .9525980E-02   .9709421E-02
   .9591444E-02   .9166406E-02   .8531868E-02   .7577789E-02   .6812790E-02
   .6731282E-02   .6997926E-02   .7506000E-02   .8423643E-02   .9701813E-02
   .1112316E-01   .1242520E-01   .1396889E-01   .1542878E-01   .1623607E-01
   .1698008E-01   .1704080E-01   .1626737E-01   .1550063E-01   .1445901E-01
   .1310894E-01   .1143096E-01   .9598922E-02   .8067646E-02   .7019159E-02
   .6193140E-02   .5462514E-02   .5209701E-02   .5147319E-02   .5189706E-02
   .5699779E-02   .6197587E-02   .6426998E-02   .6593860E-02   .6458817E-02
   .6276137E-02   .6091890E-02   .5944023E-02   .6005268E-02   .5804673E-02
   .5560595E-02   .5274085E-02   .4640163E-02   .4073534E-02   .3314424E-02
   .2600363E-02   .2536707E-02   .2567467E-02   .3065474E-02   .4046383E-02
   .4848401E-02   .5797250E-02   .6909245E-02   .7819212E-02   .8394853E-02
   .8538103E-02   .8228362E-02   .7868906E-02   .7536425E-02   .7312689E-02
   .7295175E-02   .7397449E-02   .7813697E-02   .8261891E-02   .8526467E-02
   .8699534E-02   .8764935E-02   .8784979E-02   .8515736E-02   .8104314E-02
   .7700260E-02   .7336096E-02   .7198563E-02   .7220969E-02   .7844682E-02
   .8749101E-02   .9430532E-02   .1023457E-01   .1166800E-01   .1359181E-01
   .1522987E-01   .1638125E-01   .1694488E-01   .1750674E-01   .1798936E-01
   .1767003E-01   .1685801E-01   .1581570E-01   .1484409E-01   .1372483E-01
   .1270857E-01   .1190709E-01   .1101291E-01   .1067737E-01   .1109132E-01
   .1169694E-01   .1214588E-01   .1245270E-01   .1247320E-01   .1253551E-01
   .1262657E-01   .1241793E-01   .1193949E-01   .1110195E-01   .9973031E-02
   .8428051E-02   .6407254E-02   .4011641E-02   .1716494E-02   .1644856E-03
  -.4838269E-03   .3048587E-05   .1573111E-02   .3846166E-02   .6375760E-02
   .8600143E-02   .1010945E-01   .1079255E-01   .1100763E-01   .1082615E-01
   .1053437E-01   .1013699E-01   .9534243E-02   .9509922E-02   .9617792E-02
   .9256814E-02   .8652580E-02   .7975497E-02   .7722641E-02   .7840795E-02
   .7849554E-02   .7828946E-02   .7959455E-02   .7798867E-02   .7510248E-02
   .8079111E-02   .9105901E-02   .9868471E-02   .1016666E-01   .9623482E-02
   .8609164E-02   .7274600E-02   .5921704E-02   .4749802E-02   .3422136E-02
   .2450540E-02   .2289324E-02   .2535688E-02   .2563194E-02   .2553919E-02
   .2482032E-02   .2179494E-02   .1635933E-02   .7773482E-03   .1447752E-03
   .1333948E-03   .4637193E-03   .8464992E-03   .1303166E-02   .1800914E-02
   .2204296E-02   .2546735E-02   .2924848E-02   .3152603E-02   .3541365E-02
   .4157885E-02   .4766887E-02   .5359670E-02   .5515842E-02   .5609801E-02
   .6223080E-02   .7117436E-02   .8211489E-02   .9163100E-02   .9571771E-02
   .9903083E-02   .1015626E-01   .1000125E-01   .1004373E-01   .1024314E-01
   .1021418E-01   .1050975E-01   .1098113E-01   .1097529E-01   .1060353E-01
   .1008613E-01   .9564237E-02   .9221274E-02   .8846444E-02   .8342521E-02
   .7808914E-02   .7246428E-02   .6264190E-02   .5050229E-02   .4428976E-02
   .4289631E-02   .4437322E-02   .4892327E-02   .5373815E-02   .5682998E-02
   .5912903E-02   .6100066E-02   .6429882E-02   .6882246E-02   .7055151E-02
   .6914805E-02   .6329833E-02   .5310849E-02   .4531496E-02   .3833942E-02
   .3071287E-02   .2889625E-02   .2868765E-02   .2638456E-02   .2405846E-02
   .2127772E-02   .1798871E-02   .1547718E-02   .1727054E-02   .2406414E-02
   .3352773E-02   .4279714E-02   .4958790E-02   .5587742E-02   .6353088E-02
   .7462533E-02   .8339441E-02   .8420177E-02   .8089591E-02   .7500608E-02
   .7189100E-02   .7491850E-02   .8041445E-02   .8530070E-02   .8622075E-02
   .8039304E-02   .6890050E-02   .5733367E-02   .4805025E-02   .4034527E-02
   .3707780E-02   .3634813E-02   .3940390E-02   .4499486E-02   .5025723E-02
   .5732214E-02   .6243424E-02   .6742254E-02   .7016521E-02   .6574315E-02
   .6044829E-02   .5700250E-02   .5026756E-02   .4264326E-02   .3809620E-02
   .3181849E-02   .2458596E-02   .1822683E-02   .8407184E-03  -.3331073E-03
  -.1657259E-02  -.3056266E-02  -.3764847E-02  -.3741014E-02  -.3596465E-02
  -.3322630E-02  -.2695006E-02  -.1814851E-02  -.1190484E-02  -.1188452E-02
  -.1539235E-02  -.1891291E-02  -.1697891E-02  -.1328235E-02  -.1089590E-02
  -.5036475E-03   .6559077E-04   .4192234E-03   .7919262E-03   .1081851E-02
   .9609634E-03   .5256919E-03   .1493651E-03  -.1412025E-03  -.1024398E-03
   .4078539E-03   .8514665E-03   .1268054E-02   .1900935E-02   .2229477E-02
   .2215420E-02   .2399777E-02   .2752664E-02   .3305205E-02   .4222681E-02
   .5102949E-02   .5375496E-02   .4977353E-02   .4716524E-02   .4436115E-02
   .4033483E-02   .3851188E-02   .3656336E-02   .3551342E-02   .3619309E-02
   .3804971E-02   .3956373E-02   .4093475E-02   .3694107E-02   .2675233E-02
   .1558884E-02  -.2286139E-05  -.1469668E-02  -.2223715E-02  -.2846895E-02
  -.3210431E-02  -.3248808E-02  -.3428155E-02  -.3133525E-02  -.2194873E-02
  -.1473478E-02  -.6227484E-03   .1417603E-03   .2573230E-04  -.1668440E-03
   .1995064E-03   .7587869E-03   .1429062E-02   .2202012E-02   .2412738E-02
   .1985575E-02   .1265068E-02   .4189093E-03  -.1072993E-03  -.6635715E-03
  -.1364094E-02  -.1835141E-02  -.2586580E-02  -.3688865E-02  -.5023121E-02
  -.6337432E-02  -.7031822E-02  -.7386220E-02  -.7761066E-02  -.7782157E-02
  -.7497070E-02  -.7138489E-02  -.6234032E-02  -.4620623E-02  -.2911555E-02
  -.1696320E-02  -.8161104E-03  -.2688363E-03  -.3703153E-03  -.1070993E-02
  -.2133550E-02  -.2900081E-02  -.3404985E-02  -.4104114E-02  -.4800327E-02
  -.5685290E-02  -.6725845E-02  -.7358018E-02  -.7701003E-02  -.7859385E-02
  -.7803052E-02  -.7653199E-02  -.7671601E-02  -.7785929E-02  -.7913907E-02
  -.8252461E-02  -.8414912E-02  -.8313640E-02  -.7918376E-02  -.7523625E-02
  -.7020082E-02  -.5924924E-02  -.4689931E-02  -.3354053E-02  -.1824135E-02
  -.2459102E-03   .9900632E-03   .1427200E-02   .1457398E-02   .1246463E-02
   .7145985E-03   .1273218E-03  -.4970749E-03  -.1207571E-02  -.1961498E-02
  -.2520340E-02  -.2566966E-02  -.2316277E-02  -.2058097E-02  -.1869853E-02
  -.2300112E-02  -.3039773E-02  -.3437538E-02  -.3481265E-02  -.3117136E-02
  -.2450264E-02  -.1666242E-02  -.6810665E-03   .4228566E-03   .1033660E-02
   .1248499E-02   .1028328E-02   .3040187E-03  -.6999604E-03  -.2014135E-02
  -.3487587E-02  -.5267582E-02  -.7139070E-02  -.8747449E-02  -.1015923E-01
  -.1141957E-01  -.1250563E-01  -.1312909E-01  -.1321000E-01  -.1286738E-01
  -.1211866E-01  -.1099808E-01  -.9842783E-02  -.8835422E-02  -.7553483E-02
  -.6379906E-02  -.5746919E-02  -.5314457E-02  -.5055434E-02  -.5025537E-02
  -.4923495E-02  -.4629239E-02  -.4316675E-02  -.3788250E-02  -.3311313E-02
  -.3020141E-02  -.2770523E-02  -.2535135E-02  -.1904947E-02  -.1363427E-02
  -.1059292E-02  -.8826995E-03  -.9706880E-03  -.1143196E-02  -.1439123E-02
  -.1568245E-02  -.1516138E-02  -.1637577E-02  -.1992322E-02  -.2464442E-02
  -.2734747E-02  -.3387156E-02  -.4449433E-02  -.5282068E-02  -.6241815E-02
  -.6963618E-02  -.7222105E-02  -.7185469E-02  -.6923517E-02  -.6501952E-02
  -.5878594E-02  -.5586171E-02  -.5987955E-02  -.6697837E-02  -.7404119E-02
  -.8229787E-02  -.8886996E-02  -.9005093E-02  -.8637953E-02  -.7757372E-02
  -.6283695E-02  -.4682958E-02  -.3068344E-02  -.1525426E-02  -.2491435E-03
   .1008770E-02   .1706748E-02   .1880047E-02   .1853534E-02   .1451785E-02
   .8467931E-03   .1179213E-03  -.9366638E-03  -.1956090E-02  -.2483095E-02
  -.2979859E-02  -.3466741E-02  -.3755323E-02  -.3972603E-02  -.4132062E-02
  -.4216066E-02  -.4192359E-02  -.4081371E-02  -.4006445E-02  -.4089947E-02
  -.4159344E-02  -.4203385E-02  -.4242847E-02  -.3781470E-02  -.3205520E-02
  -.2658586E-02  -.1706570E-02  -.8569021E-03  -.2506827E-03   .2202220E-03
   .4070821E-03   .4899469E-03   .5107403E-03   .3067007E-03  -.8570006E-04
  -.9702493E-03  -.2273489E-02  -.3625162E-02  -.5151623E-02  -.6706009E-02
  -.7867709E-02  -.8678016E-02  -.9297902E-02  -.9314532E-02  -.8999973E-02
  -.8750170E-02  -.8168700E-02  -.7528179E-02  -.6988773E-02  -.6572687E-02
  -.6302269E-02  -.6185214E-02  -.6230734E-02  -.6360665E-02  -.6737791E-02
  -.7315705E-02  -.7793842E-02  -.8108849E-02  -.8421312E-02  -.8630222E-02
  -.9006000E-02  -.9572974E-02  -.1009120E-01  -.1012646E-01  -.9679034E-02
  -.8827491E-02  -.7627449E-02  -.6418631E-02  -.5158123E-02  -.4090124E-02
  -.3572082E-02  -.4017138E-02  -.4715733E-02  -.5319844E-02  -.6001866E-02
  -.6674277E-02  -.7535864E-02  -.8025348E-02  -.8562886E-02  -.9466597E-02
  -.1006449E-01  -.1046038E-01  -.1076705E-01  -.1051984E-01  -.9746738E-02
  -.9119608E-02  -.8349336E-02  -.7303082E-02  -.6134515E-02  -.4765023E-02
  -.3929271E-02  -.3426080E-02  -.3101108E-02  -.3483507E-02  -.3923835E-02
  -.4146370E-02  -.4528772E-02  -.4545404E-02  -.4099860E-02  -.3570472E-02
  -.2905654E-02  -.2415555E-02  -.2600019E-02  -.3250838E-02  -.3717491E-02
  -.3912622E-02  -.3717813E-02  -.3834222E-02  -.4492605E-02  -.4837065E-02
  -.5298454E-02  -.5753902E-02  -.5811039E-02  -.6021289E-02  -.6351977E-02
  -.6584372E-02  -.6730489E-02  -.6700943E-02  -.6642368E-02  -.6644687E-02
  -.6744224E-02  -.7142829E-02  -.7892750E-02  -.8997376E-02  -.1026984E-01
  -.1133165E-01  -.1204054E-01  -.1250462E-01  -.1273175E-01  -.1249198E-01
  -.1207520E-01  -.1195978E-01  -.1165978E-01  -.1107639E-01  -.1046099E-01
  -.9597983E-02  -.8651503E-02  -.8064465E-02  -.7511999E-02  -.6269416E-02
  -.5377905E-02  -.5215500E-02  -.5214581E-02  -.5672717E-02  -.6130201E-02
  -.6694757E-02  -.7355821E-02  -.7693403E-02  -.8271592E-02  -.8564188E-02
  -.8310247E-02  -.8352680E-02  -.8629483E-02  -.8666110E-02  -.8782113E-02
  -.9279403E-02  -.9888392E-02  -.1062035E-01  -.1114952E-01  -.1130536E-01
  -.1155004E-01  -.1206893E-01  -.1231227E-01  -.1216822E-01  -.1184381E-01
  -.1121384E-01  -.1069133E-01  -.1007592E-01  -.8916009E-02  -.7561758E-02
  -.6216041E-02  -.5018719E-02  -.4264371E-02  -.3651969E-02  -.2613270E-02
  -.1591069E-02  -.9579966E-03  -.3928046E-03  -.6972945E-04  -.3087405E-03
  -.7124775E-03  -.8782983E-03  -.1055728E-02  -.1182290E-02  -.1615727E-02
  -.2390373E-02  -.2590770E-02  -.2906451E-02  -.3892394E-02  -.4723218E-02
  -.5349209E-02  -.6125981E-02  -.6781671E-02  -.7323238E-02  -.8010539E-02
  -.8411598E-02  -.8609111E-02  -.8916590E-02  -.8730053E-02  -.8296090E-02
  -.8167698E-02  -.8026268E-02  -.8024865E-02  -.8399066E-02  -.8994014E-02
  -.9382223E-02  -.9480122E-02  -.9490647E-02  -.9158919E-02  -.8988324E-02
  -.9161930E-02  -.8943774E-02  -.8764143E-02  -.9041364E-02  -.9196956E-02
  -.9311459E-02  -.1006705E-01  -.1089666E-01  -.1115594E-01  -.1177394E-01
  -.1289576E-01  -.1360991E-01  -.1415021E-01  -.1440782E-01  -.1422794E-01
  -.1411778E-01  -.1359822E-01  -.1259409E-01  -.1111393E-01  -.9352195E-02
  -.7827752E-02  -.6426292E-02  -.5124277E-02  -.3883513E-02  -.3044481E-02
  -.2606564E-02  -.2434554E-02  -.2866892E-02  -.3686558E-02  -.4724934E-02
  -.5764571E-02  -.6592443E-02  -.7435790E-02  -.8353594E-02  -.9005654E-02
  -.9346831E-02  -.9808402E-02  -.1013605E-01  -.1017598E-01  -.9925073E-02
  -.9019651E-02  -.7887760E-02  -.6976983E-02  -.6005075E-02  -.5094550E-02
  -.4561785E-02  -.4129878E-02  -.3689330E-02  -.3198536E-02  -.2525020E-02
  -.2002430E-02  -.2044785E-02  -.2173030E-02  -.2106805E-02  -.2302046E-02
  -.2475350E-02  -.2462650E-02  -.2515941E-02  -.2578080E-02  -.2481136E-02
  -.2483747E-02  -.2356422E-02  -.2159071E-02  -.1922640E-02  -.9658898E-03
  -.1561600E-03   .1998207E-03   .4026643E-03   .4698937E-03   .3775616E-03
   .1940423E-03   .1458618E-03  -.2883170E-03  -.5158987E-03  -.3765768E-03
  -.3863657E-03  -.3625670E-03  -.7032984E-03  -.1007533E-02  -.1008265E-02
  -.1338928E-02  -.1792201E-02  -.1879195E-02  -.2172818E-02  -.2842151E-02
  -.3244621E-02  -.3806054E-02  -.4535125E-02  -.4869431E-02  -.5062333E-02
  -.5248939E-02  -.5193935E-02  -.5263267E-02  -.5338369E-02  -.5143545E-02
  -.5001088E-02  -.4757724E-02  -.4245284E-02  -.3409113E-02  -.2407774E-02
  -.1450222E-02  -.3933740E-03   .3982002E-03   .9426309E-03   .1625082E-02
   .1915459E-02   .1591018E-02   .9939886E-03   .5096385E-03  -.1404138E-03
  -.8481142E-03  -.1027648E-02  -.1068862E-02  -.1229893E-02  -.1191788E-02
  -.7662834E-03  -.2711002E-03   .2731844E-03   .8231967E-03   .1282460E-02
   .1854361E-02   .2396725E-02   .2893359E-02   .3211263E-02   .3184542E-02
   .3022936E-02   .2730860E-02   .2106399E-02   .1356782E-02   .3995160E-03
  -.5028971E-03  -.8290229E-03  -.9226437E-03  -.7945022E-03  -.3237848E-03
   .4136567E-04   .2561658E-03   .2985965E-03  -.1137098E-03  -.4782758E-03
  -.5250474E-03  -.6126493E-03  -.6967272E-03  -.7160603E-03  -.7819426E-03
  -.7056733E-03  -.7329050E-03  -.9542094E-03  -.9537025E-03  -.6844866E-03
  -.9657734E-04   .8479229E-03   .1713080E-02   .2705037E-02   .3665674E-02
   .4134212E-02   .4573391E-02   .4474431E-02   .3863734E-02   .3357939E-02
   .2534156E-02   .1107870E-02  -.5779948E-03  -.2137052E-02  -.3776125E-02
  -.5372682E-02  -.6478826E-02  -.6979776E-02  -.6979245E-02  -.6680305E-02
  -.6191433E-02  -.5411615E-02  -.4179392E-02  -.2690912E-02  -.1631545E-02
  -.1163461E-02  -.5430828E-03   .6496574E-04   .1842765E-03   .5060266E-04
   .5973695E-04   .2281248E-03   .2408884E-03   .1608040E-03   .2289070E-03
   .5318153E-03   .1129032E-02   .2113058E-02   .2721755E-02   .2944048E-02
   .3553489E-02   .3705092E-02   .3360212E-02   .2959707E-02   .2143669E-02
   .1328092E-02   .5807432E-03   .8437425E-05  -.1617244E-03  -.6220635E-03
  -.1226458E-02  -.1681993E-02  -.1953429E-02  -.1893572E-02  -.1605555E-02
  -.8749431E-03  -.1684974E-03   .6322868E-03   .1798079E-02   .2563704E-02
   .2910351E-02   .3164035E-02   .3345612E-02   .3554530E-02   .3680249E-02
   .3519702E-02   .3059752E-02   .2820349E-02   .2883089E-02   .2837126E-02
   .3013971E-02   .3370850E-02   .3772390E-02   .4248583E-02   .4629246E-02
   .5010963E-02   .5232932E-02   .5224534E-02   .5094975E-02   .4874213E-02
   .4650607E-02   .4110650E-02   .3551799E-02   .3405074E-02   .3475980E-02
   .3712684E-02   .3987100E-02   .4309435E-02   .4642252E-02   .5014564E-02
   .5679352E-02   .6550026E-02   .7189952E-02   .7504071E-02   .7755869E-02
   .8239524E-02   .9145081E-02   .1012967E-01   .1077911E-01   .1148210E-01
   .1231521E-01   .1270391E-01   .1261931E-01   .1215646E-01   .1151913E-01
   .1110128E-01   .1116209E-01   .1189234E-01   .1279091E-01   .1337056E-01
   .1385449E-01   .1425205E-01   .1448854E-01   .1456114E-01   .1453548E-01
   .1408402E-01   .1302278E-01   .1208110E-01   .1099664E-01   .9479507E-02
   .8471951E-02   .7707584E-02   .6823567E-02   .6520545E-02   .6545622E-02
   .6376739E-02   .6684160E-02   .7342925E-02   .7976208E-02   .9005336E-02
   .9776965E-02   .1027467E-01   .1096690E-01   .1118169E-01   .1122001E-01
   .1160137E-01   .1206707E-01   .1248956E-01   .1263097E-01   .1274278E-01
   .1255998E-01   .1198448E-01   .1151756E-01   .1110679E-01   .1078393E-01
   .1063445E-01   .1069560E-01   .1075876E-01   .1079030E-01   .1101467E-01
   .1100613E-01   .1073472E-01   .1061698E-01   .1059181E-01   .1084129E-01
   .1145671E-01   .1220061E-01   .1290675E-01   .1362883E-01   .1464225E-01
   .1561043E-01   .1645523E-01   .1787495E-01   .1926914E-01   .1994932E-01
   .2042147E-01   .2063545E-01   .2057061E-01   .2035832E-01   .1971331E-01
   .1913567E-01   .1853615E-01   .1776960E-01   .1714983E-01   .1642421E-01
   .1567711E-01   .1510703E-01   .1496955E-01   .1498342E-01   .1493114E-01
   .1491072E-01   .1469952E-01   .1448319E-01   .1410754E-01   .1334559E-01
   .1257082E-01   .1174973E-01   .1108567E-01   .1085219E-01   .1083420E-01
   .1073737E-01   .1067077E-01   .1081778E-01   .1107698E-01   .1172194E-01
   .1254054E-01   .1284391E-01   .1265768E-01   .1253411E-01   .1236127E-01
   .1186773E-01   .1138757E-01   .1079684E-01   .1009401E-01   .9473559E-02
   .8596185E-02   .7688149E-02   .6942662E-02   .6105637E-02   .5271864E-02
   .4969666E-02   .5215226E-02   .5712478E-02   .6718618E-02   .7947407E-02
   .8879426E-02   .9767166E-02   .1068972E-01   .1115768E-01   .1144700E-01
   .1178948E-01   .1190736E-01   .1186643E-01   .1158524E-01   .1128884E-01
   .1105555E-01   .1094559E-01   .1092665E-01   .1049997E-01   .1019329E-01
   .1028467E-01   .1041177E-01   .1063129E-01   .1092485E-01   .1123299E-01
   .1164458E-01   .1243243E-01   .1327660E-01   .1409186E-01   .1492108E-01
   .1528439E-01   .1553122E-01   .1582130E-01   .1565103E-01   .1504123E-01
   .1427940E-01   .1345137E-01   .1255907E-01   .1132894E-01   .1005356E-01
   .9042927E-02   .8081754E-02   .7357614E-02   .6925567E-02   .6552194E-02
   .6180234E-02   .6020828E-02   .6158203E-02   .6603854E-02   .7450691E-02
   .7948530E-02   .7713792E-02   .7452638E-02   .7655494E-02   .8202071E-02
   .8360800E-02   .7830700E-02   .7092115E-02   .6863299E-02   .6894411E-02
   .6595017E-02   .6144536E-02   .5767282E-02   .5370204E-02   .5010052E-02
   .4676001E-02   .4355350E-02   .4292130E-02   .4269937E-02   .4479703E-02
   .5003506E-02   .5678762E-02   .6499408E-02   .7181906E-02   .7793833E-02
   .8269281E-02   .8549139E-02   .8691757E-02   .8725209E-02   .8685710E-02
   .8271717E-02   .7557410E-02   .6856667E-02   .6493502E-02   .6453030E-02
   .6388953E-02   .6451756E-02   .6472993E-02   .5978473E-02   .5235181E-02
   .4474740E-02   .3532248E-02   .2486062E-02   .1567849E-02   .9101630E-03
   .5116834E-03   .3654755E-03   .4197484E-03   .7077816E-03   .1143962E-02
   .1316569E-02   .1285187E-02   .1494777E-02   .1969299E-02   .2411945E-02
   .2791683E-02   .3127578E-02   .3178441E-02   .3076093E-02   .2981733E-02
   .2811861E-02   .2743912E-02   .2799246E-02   .3148726E-02   .3857780E-02
   .4551732E-02   .5200966E-02   .5611011E-02   .5736397E-02   .5659373E-02
   .5446775E-02   .5425772E-02   .5210420E-02   .4742028E-02   .4482354E-02
   .4032279E-02   .3496978E-02   .3265909E-02   .3000930E-02   .2708471E-02
   .2364578E-02   .1771564E-02   .1158524E-02   .6818596E-03   .2768912E-03
   .9493285E-04   .3171762E-03   .6654500E-03   .9006877E-03   .1106996E-02
   .1189177E-02   .1384776E-02   .1684564E-02   .1952336E-02   .2325116E-02
   .2711385E-02   .3270201E-02   .3749002E-02   .4311228E-02   .5003909E-02
   .5677041E-02   .6256945E-02   .6208988E-02   .5971554E-02   .5583046E-02
   .4878884E-02   .4221798E-02   .3722977E-02   .3487575E-02   .3275335E-02
   .2933693E-02   .2784982E-02   .2870453E-02   .2851062E-02   .2852668E-02
   .2747599E-02   .2427741E-02   .2448532E-02   .2418747E-02   .2116389E-02
   .1835060E-02   .1527145E-02   .1513772E-02   .1672810E-02   .1588691E-02
   .1264086E-02   .9300681E-03   .6210988E-03  -.2923076E-04  -.8197357E-03
  -.1619290E-02  -.2244124E-02  -.2276365E-02  -.1922039E-02  -.1241065E-02
  -.3960488E-03   .3179057E-03   .9028646E-03   .1336048E-02   .1244450E-02
   .7997938E-03   .5939614E-03   .1099577E-03  -.6797209E-03  -.1180106E-02
  -.1567251E-02  -.2019903E-02  -.2464884E-02  -.2793319E-02  -.3240665E-02
  -.3550558E-02  -.3565266E-02  -.3363413E-02  -.2826114E-02  -.2269687E-02
  -.1621984E-02  -.1025239E-02  -.7342315E-03  -.7292624E-03  -.9210877E-03
  -.1046289E-02  -.1363569E-02  -.1840274E-02  -.2177144E-02  -.2428732E-02
  -.2405794E-02  -.2147702E-02  -.1731605E-02  -.1353397E-02  -.1214765E-02
  -.6622359E-03   .3992121E-03   .1308252E-02   .1707118E-02   .1285875E-02
   .3122826E-03  -.7611892E-03  -.1731800E-02  -.2643798E-02  -.3853289E-02
  -.5109404E-02  -.6043381E-02  -.7044112E-02  -.7984327E-02  -.8556747E-02
  -.9031823E-02  -.9106141E-02  -.8672593E-02  -.8291314E-02  -.8046225E-02
  -.7547972E-02  -.7056258E-02  -.6793224E-02  -.6636609E-02  -.6491878E-02
  -.6344935E-02  -.6616201E-02  -.7156936E-02  -.7792910E-02  -.8385050E-02
  -.8486044E-02  -.8664932E-02  -.9026752E-02  -.9352789E-02  -.9946030E-02
  -.1030724E-01  -.1035566E-01  -.1023748E-01  -.9773607E-02  -.8898932E-02
  -.7812272E-02  -.6981700E-02  -.6520908E-02  -.6553884E-02  -.6777554E-02
  -.7021674E-02  -.7531536E-02  -.8256032E-02  -.9149877E-02  -.9989418E-02
  -.1055622E-01  -.1091910E-01  -.1117543E-01  -.1129559E-01  -.1148313E-01
  -.1137190E-01  -.1114098E-01  -.1133014E-01  -.1126512E-01  -.1089605E-01
  -.1051065E-01  -.9938914E-02  -.9416390E-02  -.9426698E-02  -.9463969E-02
  -.9385488E-02  -.9843887E-02  -.1025459E-01  -.1048985E-01  -.1087919E-01
  -.1099683E-01  -.1109072E-01  -.1121499E-01  -.1119598E-01  -.1107534E-01
  -.1055395E-01  -.9897935E-02  -.9259251E-02  -.8447243E-02  -.7779364E-02
  -.7316529E-02  -.7184496E-02  -.7749608E-02  -.8445318E-02  -.8795981E-02
  -.8846251E-02  -.8587511E-02  -.8492767E-02  -.8478200E-02  -.8531564E-02
  -.8698612E-02  -.8749013E-02  -.9039338E-02  -.9376488E-02  -.9540098E-02
  -.9621607E-02  -.9687479E-02  -.9714926E-02  -.9905591E-02  -.1044265E-01
  -.1076741E-01  -.1095821E-01  -.1116192E-01  -.1114677E-01  -.1114605E-01
  -.1109638E-01  -.1083380E-01  -.1057883E-01  -.1065996E-01  -.1080878E-01
  -.1089083E-01  -.1141055E-01  -.1223212E-01  -.1314681E-01  -.1403859E-01
  -.1450884E-01  -.1469249E-01  -.1477170E-01  -.1466858E-01  -.1447331E-01
  -.1416259E-01  -.1373028E-01  -.1325698E-01  -.1280652E-01  -.1245469E-01
  -.1213485E-01  -.1220347E-01  -.1252613E-01  -.1264033E-01  -.1273216E-01
  -.1298251E-01  -.1359419E-01  -.1406388E-01  -.1431532E-01  -.1463676E-01
  -.1465583E-01  -.1480397E-01  -.1487948E-01  -.1448093E-01  -.1418965E-01
  -.1431782E-01  -.1433660E-01  -.1394244E-01  -.1352965E-01  -.1328097E-01
  -.1314673E-01  -.1326590E-01  -.1388816E-01  -.1466861E-01  -.1517085E-01
  -.1530178E-01  -.1520020E-01  -.1491628E-01  -.1477671E-01  -.1498697E-01
  -.1515110E-01  -.1519210E-01  -.1515703E-01  -.1504783E-01  -.1521453E-01
  -.1563488E-01  -.1587822E-01  -.1587675E-01  -.1592067E-01  -.1593191E-01
  -.1574675E-01  -.1555006E-01  -.1551931E-01  -.1546545E-01  -.1520098E-01
  -.1487204E-01  -.1459275E-01  -.1419966E-01  -.1372337E-01  -.1382520E-01
  -.1418125E-01  -.1412379E-01  -.1406629E-01  -.1397084E-01  -.1380176E-01
  -.1387175E-01  -.1380993E-01  -.1384850E-01  -.1418594E-01  -.1425744E-01
  -.1400264E-01  -.1350756E-01  -.1272844E-01  -.1198971E-01  -.1134292E-01
  -.1086240E-01  -.1068103E-01  -.1040450E-01  -.1008714E-01  -.1001431E-01
  -.1023745E-01  -.1065366E-01  -.1088339E-01  -.1082252E-01  -.1100576E-01
  -.1113598E-01  -.1078456E-01  -.1051387E-01  -.1048926E-01  -.1037251E-01
  -.1016024E-01  -.9966103E-02  -.9605944E-02  -.9314131E-02  -.8935744E-02
  -.8573378E-02  -.8479205E-02  -.8120841E-02  -.7764998E-02  -.7574955E-02
  -.7406955E-02  -.7308933E-02  -.7180201E-02  -.7139226E-02  -.6943001E-02
  -.6746485E-02  -.6805853E-02  -.6907818E-02  -.7079339E-02  -.7197562E-02
  -.7450768E-02  -.7848993E-02  -.8175257E-02  -.8322790E-02  -.8303869E-02
  -.8293898E-02  -.8093762E-02  -.7888737E-02  -.8021649E-02  -.8391964E-02
  -.8861294E-02  -.9428998E-02  -.9987789E-02  -.1026593E-01  -.1053937E-01
  -.1089247E-01  -.1124000E-01  -.1162015E-01  -.1166781E-01  -.1167764E-01
  -.1165718E-01  -.1130681E-01  -.1111851E-01  -.1103419E-01  -.1073045E-01
  -.1054736E-01  -.1053386E-01  -.1015608E-01  -.9878767E-02  -.1015002E-01
  -.1001083E-01  -.9382021E-02  -.8458284E-02  -.7232717E-02  -.6121590E-02
  -.4999114E-02  -.4136563E-02  -.3600710E-02  -.3487815E-02  -.3774470E-02
  -.4176290E-02  -.5014785E-02  -.5723147E-02  -.6010523E-02  -.6074962E-02
  -.5714727E-02  -.5005396E-02  -.4264315E-02  -.3852290E-02  -.3974449E-02
  -.4433506E-02  -.4797819E-02  -.4866422E-02  -.4472185E-02  -.3649590E-02
  -.2526538E-02  -.1241623E-02  -.3102853E-03   .8720719E-04  -.3904011E-03
  -.1942958E-02  -.3754317E-02  -.5139270E-02  -.5073424E-02  -.3926035E-02
  -.3112424E-02  -.2668496E-02  -.2564023E-02  -.2529425E-02  -.2624737E-02
  -.2780281E-02  -.2285769E-02  -.1410362E-02  -.7174824E-03  -.3045082E-03
  -.9107496E-04  -.1456832E-04   .1429829E-03   .6637436E-03   .1376568E-02
   .1975481E-02   .2127345E-02   .1598141E-02   .7106037E-03  -.2742694E-03
  -.8279961E-03  -.8714278E-03  -.1141248E-02  -.1448779E-02  -.1534766E-02
  -.1215943E-02  -.5978058E-03  -.1516731E-03   .2544721E-03   .9015393E-03
   .1668860E-02   .2018492E-02   .2233910E-02   .2416082E-02   .2206032E-02
   .2143207E-02   .2336477E-02   .2463689E-02   .2488438E-02   .2392876E-02
   .1993785E-02   .1252426E-02   .7379670E-03   .8382351E-03   .1444383E-02
   .2376467E-02   .3198399E-02   .3731272E-02   .4354668E-02   .4860928E-02
   .5214595E-02   .5613893E-02   .6109234E-02   .7013758E-02   .7946645E-02
   .8337774E-02   .8312900E-02   .8104604E-02   .7611635E-02   .7083217E-02
   .6879244E-02   .6780532E-02   .6644754E-02   .6649195E-02   .6561637E-02
   .6279309E-02   .6165122E-02   .6259073E-02   .6644471E-02   .7080122E-02
   .7541348E-02   .8003905E-02   .7835431E-02   .7549806E-02   .7452924E-02
   .7284970E-02   .7460135E-02   .8009982E-02   .8762761E-02   .9504874E-02
   .9957658E-02   .1018010E-01   .1030083E-01   .1046496E-01   .1049962E-01
   .1043317E-01   .1048770E-01   .1059600E-01   .1050351E-01   .1000552E-01
   .9398242E-02   .8669580E-02   .7843685E-02   .6976653E-02   .5972883E-02
   .5351431E-02   .5465724E-02   .5904721E-02   .6416069E-02   .7031552E-02
   .7683942E-02   .8396941E-02   .9246262E-02   .9976248E-02   .1043974E-01
   .1074467E-01   .1057538E-01   .9752409E-02   .8708470E-02   .7980035E-02
   .7563204E-02   .7330952E-02   .6869993E-02   .6181610E-02   .5592176E-02
   .5253563E-02   .5086728E-02   .4701063E-02   .4113014E-02   .3471302E-02
   .2898791E-02   .2509602E-02   .2631567E-02   .3097590E-02   .3664757E-02
   .4335401E-02   .4875681E-02   .5274261E-02   .5609589E-02   .6153626E-02
   .6514950E-02   .6064208E-02   .5670645E-02   .5548812E-02   .5060077E-02
   .5053800E-02   .5480144E-02   .5467792E-02   .5859803E-02   .6747827E-02
   .7383733E-02   .7684784E-02   .7592836E-02   .7304096E-02   .7062970E-02
   .7005010E-02   .7150171E-02   .7194514E-02   .7118830E-02   .7265935E-02
   .7244489E-02   .6724564E-02   .6346284E-02   .6210635E-02   .5793932E-02
   .5412464E-02   .5479985E-02   .5481850E-02   .5470341E-02   .5690944E-02
   .5990938E-02   .6501147E-02   .6978420E-02   .7497572E-02   .8108244E-02
   .8598346E-02   .9230895E-02   .9830894E-02   .1031423E-01   .1070618E-01
   .1063838E-01   .1040641E-01   .1031415E-01   .9883690E-02   .9302431E-02
   .8796735E-02   .7808896E-02   .6715494E-02   .5720228E-02   .4719841E-02
   .4089974E-02   .4028765E-02   .4362785E-02   .4710856E-02   .5060669E-02
   .5225115E-02   .5221842E-02   .5401801E-02   .5804568E-02   .6204328E-02
   .6589240E-02   .7106081E-02   .7686353E-02   .8182812E-02   .8613674E-02
   .8891501E-02   .9020548E-02   .9428043E-02   .9926097E-02   .1031344E-01
   .1077669E-01   .1096448E-01   .1108678E-01   .1147482E-01   .1162170E-01
   .1155348E-01   .1129490E-01   .1097463E-01   .1074195E-01   .1020375E-01
   .1007843E-01   .1041230E-01   .1054784E-01   .1088079E-01   .1144286E-01
   .1178970E-01   .1215478E-01   .1251026E-01   .1239952E-01   .1238317E-01
   .1235264E-01   .1219747E-01   .1212224E-01   .1211669E-01   .1243843E-01
   .1247122E-01   .1216942E-01   .1180553E-01   .1137857E-01   .1110433E-01
   .1086492E-01   .1083546E-01   .1075646E-01   .1042185E-01   .1046274E-01
   .1070968E-01   .1059166E-01   .1041922E-01   .1050588E-01   .1075457E-01
   .1080680E-01   .1054727E-01   .1014638E-01   .9913990E-02   .9994569E-02
   .9770019E-02   .9505085E-02   .9134035E-02   .8759609E-02   .8675058E-02
   .8264990E-02   .7872061E-02   .7638586E-02   .7287519E-02   .6976140E-02
   .6934943E-02   .7126384E-02   .7093015E-02   .6809323E-02   .6751367E-02
   .6903922E-02   .6996274E-02   .7001374E-02   .7108022E-02   .7241679E-02
   .7529248E-02   .8002882E-02   .8303822E-02   .8757203E-02   .8930542E-02
   .8993450E-02   .9500172E-02   .9551984E-02   .9418980E-02   .9397627E-02
   .9343994E-02   .9510474E-02   .9407428E-02   .8922547E-02   .8855839E-02
   .8923201E-02   .8718894E-02   .9067350E-02   .9837770E-02   .1069200E-01
   .1163738E-01   .1247751E-01   .1297612E-01   .1259601E-01   .1190104E-01
   .1131571E-01   .1052107E-01   .9805997E-02   .9022895E-02   .8170879E-02
   .7252835E-02   .6261671E-02   .5490540E-02   .4632864E-02   .4120862E-02
   .3999866E-02   .3985942E-02   .4280525E-02   .4701795E-02   .5389420E-02
   .5994037E-02   .6509245E-02   .7203230E-02   .7683776E-02   .7995340E-02
   .8418343E-02   .8740642E-02   .8511358E-02   .8150849E-02   .7705790E-02
   .6991665E-02   .6362321E-02   .6064548E-02   .6413325E-02   .6812293E-02
   .7023819E-02   .7570375E-02   .8109661E-02   .8122607E-02   .7791488E-02
   .7519668E-02   .7310717E-02   .7226943E-02   .6957885E-02   .6538631E-02
   .6130055E-02   .5256323E-02   .4129553E-02   .2754345E-02   .1403610E-02
   .4907908E-03  -.3369907E-03  -.8910363E-03  -.1095620E-02  -.1284203E-02
  -.1468566E-02  -.1495114E-02  -.1102177E-02  -.7455246E-03  -.2893612E-03
   .1681712E-03   .1466306E-03   .7345238E-03   .1425408E-02   .1488200E-02
   .1534970E-02   .1517245E-02   .1474808E-02   .1510899E-02   .1691634E-02
   .1927947E-02   .1997197E-02   .2079903E-02   .2224021E-02   .2652819E-02
   .3144142E-02   .2929793E-02   .2334412E-02   .1658359E-02   .8008111E-03
  -.7505806E-04  -.5591040E-03  -.6288702E-03  -.5799214E-03  -.5023671E-03
  -.7873662E-03  -.1460056E-02  -.2089734E-02  -.2507062E-02  -.3003935E-02
  -.3350953E-02  -.3330848E-02  -.3271534E-02  -.3061512E-02  -.2364418E-02
  -.1443811E-02  -.7331907E-03   .6753061E-04   .1018995E-02   .1812065E-02
   .2149098E-02   .2148123E-02   .2267939E-02   .2193555E-02   .1842172E-02
   .1581514E-02   .1526108E-02   .1529176E-02   .1510644E-02   .1511124E-02
   .1798456E-02   .2433007E-02   .2565411E-02   .2503896E-02   .2665908E-02
   .2379038E-02   .1963238E-02   .1952798E-02   .1856851E-02   .1493418E-02
   .1402913E-02   .1417174E-02   .1198040E-02   .9056622E-03   .5842821E-03
   .3084391E-03   .9417343E-04  -.1468506E-03  -.4128748E-03  -.6949151E-03
  -.9024324E-03  -.9405533E-03  -.9689850E-03  -.8670118E-03  -.2502549E-03
   .5670796E-03   .1208302E-02   .1986046E-02   .2835162E-02   .3261135E-02
   .3447224E-02   .3460667E-02   .3128797E-02   .2881236E-02   .2779068E-02
   .2504473E-02   .2236473E-02   .1996187E-02   .1869642E-02   .1739355E-02
   .1123691E-02   .6616676E-03   .9138708E-03   .1253769E-02   .1508306E-02
   .2187945E-02   .2994781E-02   .3234752E-02   .3119508E-02   .3044593E-02
   .2725337E-02   .2417763E-02   .2699164E-02   .3122903E-02   .3436019E-02
   .3746762E-02   .3669643E-02   .3299819E-02   .2957921E-02   .2477314E-02
   .1969155E-02   .1481621E-02   .7009209E-03  -.1281272E-03  -.7385238E-03
  -.1160835E-02  -.1302697E-02  -.1238392E-02  -.9876872E-03  -.6832219E-03
  -.2086070E-03   .3556803E-03   .3516435E-03   .2830157E-03   .8600870E-03
   .1142688E-02   .9135099E-03   .1173800E-02   .1702199E-02   .2145544E-02
   .2683566E-02   .2823505E-02   .2495185E-02   .2288732E-02   .2047582E-02
   .1803992E-02   .1868177E-02   .1981090E-02   .1781944E-02   .1190417E-02
   .5459641E-03  -.4311670E-04  -.5940976E-03  -.7576219E-03  -.8021151E-03
  -.9074971E-03  -.8503931E-03  -.1013463E-02  -.1111149E-02  -.9896967E-03
  -.8486720E-03  -.5286022E-03  -.4855777E-03  -.5950827E-03  -.6721422E-03
  -.8998033E-03  -.1053378E-02  -.8918090E-03  -.3734213E-03  -.1997430E-04
  -.7215493E-05   .1460184E-03   .4418983E-03   .7831774E-03   .1249288E-02
   .1232170E-02   .1103150E-02   .1157249E-02   .6922805E-03   .3435475E-03
   .3045806E-03   .3643060E-04  -.5212323E-03  -.1280316E-02  -.1980260E-02
  -.2350688E-02  -.2517808E-02  -.2608160E-02  -.2645935E-02  -.2868904E-02
  -.3131659E-02  -.3205014E-02  -.2938055E-02  -.2495826E-02  -.2016809E-02
  -.1369699E-02  -.7524436E-03  -.4005181E-03  -.3557744E-03  -.4086501E-03
  -.4496089E-03  -.5410301E-03  -.5567453E-03  -.4591572E-03  -.7516421E-03
  -.1148325E-02  -.1384782E-02  -.1768632E-02  -.2013725E-02  -.2342599E-02
  -.2645413E-02  -.2649147E-02  -.2414826E-02  -.2134757E-02  -.1937370E-02
  -.1544946E-02  -.1167922E-02  -.9332520E-03  -.6985500E-03  -.8415427E-03
  -.1273327E-02  -.1823454E-02  -.2600844E-02  -.3281870E-02  -.3713354E-02
  -.4096944E-02  -.4507236E-02  -.4620463E-02  -.4690456E-02  -.4743995E-02
  -.4464589E-02  -.4235768E-02  -.4104088E-02  -.3787426E-02  -.3569047E-02
  -.3428894E-02  -.3403372E-02  -.3743101E-02  -.3916796E-02  -.3915339E-02
  -.3991557E-02  -.4129910E-02  -.4475027E-02  -.4685416E-02  -.4638186E-02
  -.4645109E-02  -.4234282E-02  -.3656905E-02  -.3315982E-02  -.2775851E-02
  -.2367863E-02  -.2165090E-02  -.2018632E-02  -.2060930E-02  -.2058726E-02
  -.1926863E-02  -.1994164E-02  -.2322405E-02  -.2700318E-02  -.2978696E-02
  -.3460260E-02  -.3958995E-02  -.4205705E-02  -.4628750E-02  -.4925435E-02
  -.4820415E-02  -.4639989E-02  -.4675638E-02  -.4713033E-02  -.4852219E-02
  -.5199437E-02  -.5549829E-02  -.6058633E-02  -.6574367E-02  -.6901189E-02
  -.6755192E-02  -.6494187E-02  -.6616967E-02  -.6711045E-02  -.6597352E-02
  -.6419097E-02  -.6380618E-02  -.6304928E-02  -.6348911E-02  -.6785221E-02
  -.7401613E-02  -.8154715E-02  -.8681355E-02  -.8828272E-02  -.8881325E-02
  -.8719976E-02  -.7929469E-02  -.6956423E-02  -.6400819E-02  -.6113500E-02
  -.6112003E-02  -.6506963E-02  -.6687813E-02  -.6732700E-02  -.7265628E-02
  -.7856204E-02  -.8017248E-02  -.7925569E-02  -.7628989E-02  -.7225543E-02
  -.7087677E-02  -.6882597E-02  -.6672157E-02  -.6741759E-02  -.6819217E-02
  -.6813073E-02  -.6717200E-02  -.6443032E-02  -.6317813E-02  -.6302027E-02
  -.5940505E-02  -.5490277E-02  -.5096824E-02  -.4566129E-02  -.4025305E-02
  -.3890836E-02  -.4158315E-02  -.4547980E-02  -.4699929E-02  -.4846371E-02
  -.5320973E-02  -.5588164E-02  -.5714084E-02  -.5883798E-02  -.6020905E-02
  -.6161337E-02  -.6182941E-02  -.6123651E-02  -.5882578E-02  -.5512560E-02
  -.5289375E-02  -.5269735E-02  -.5199244E-02  -.5024383E-02  -.4967741E-02
  -.4797159E-02  -.4602857E-02  -.4502942E-02  -.4503684E-02  -.4438529E-02
  -.4331805E-02  -.4511933E-02  -.4425366E-02  -.4460471E-02  -.4805183E-02
  -.5069747E-02  -.5307861E-02  -.5229196E-02  -.5267679E-02  -.5207063E-02
  -.4849931E-02  -.4767292E-02  -.4798682E-02  -.4944102E-02  -.5272262E-02
  -.5454129E-02  -.5596717E-02  -.6304020E-02  -.6934692E-02  -.7023190E-02
  -.6828694E-02  -.6214287E-02  -.5707964E-02  -.6071908E-02  -.7063886E-02
  -.7938952E-02  -.8576388E-02  -.8920412E-02  -.9196389E-02  -.9577958E-02
  -.9925901E-02  -.1007158E-01  -.1017595E-01  -.1064440E-01  -.1116780E-01
  -.1112169E-01  -.1090107E-01  -.1081687E-01  -.1020260E-01  -.9577589E-02
  -.9395375E-02  -.9229701E-02  -.9051131E-02  -.8903416E-02  -.8842185E-02
  -.8811120E-02  -.8761364E-02  -.8817738E-02  -.9017626E-02  -.9314931E-02
  -.9680229E-02  -.1038253E-01  -.1130924E-01  -.1193107E-01  -.1241836E-01
  -.1259400E-01  -.1252724E-01  -.1255052E-01  -.1233860E-01  -.1210232E-01
  -.1183403E-01  -.1146304E-01  -.1110572E-01  -.1064597E-01  -.1030388E-01
  -.1028337E-01  -.1035101E-01  -.1041499E-01  -.1059875E-01  -.1061900E-01
  -.1045318E-01  -.1013818E-01  -.9560301E-02  -.9008458E-02  -.8480046E-02
  -.7965479E-02  -.7786972E-02  -.7597869E-02  -.7302177E-02  -.7505329E-02
  -.8133573E-02  -.8727835E-02  -.9016921E-02  -.9225387E-02  -.9509712E-02
  -.9781288E-02  -.1041050E-01  -.1107115E-01  -.1123341E-01  -.1096466E-01
  -.1033142E-01  -.9534518E-02  -.8621055E-02  -.7693988E-02  -.7109447E-02
  -.6669151E-02  -.6274907E-02  -.6180775E-02  -.6220071E-02  -.6336859E-02
  -.6768678E-02  -.7288457E-02  -.7696410E-02  -.8223318E-02  -.8721074E-02
  -.9052404E-02  -.9398171E-02  -.9475804E-02  -.9260035E-02  -.8941759E-02
  -.8338918E-02  -.7764409E-02  -.7140247E-02  -.6442356E-02  -.6147431E-02
  -.6065994E-02  -.5933372E-02  -.6030794E-02  -.6558927E-02  -.7046307E-02
  -.7390011E-02  -.7961621E-02  -.8322849E-02  -.8698547E-02  -.9296451E-02
  -.9490324E-02  -.9653056E-02  -.9946168E-02  -.1002262E-01  -.9809713E-02
  -.9355244E-02  -.8804123E-02  -.8536766E-02  -.8847235E-02  -.9162257E-02
  -.9026113E-02  -.8661808E-02  -.8244148E-02  -.7787668E-02  -.7363098E-02
  -.6700108E-02  -.5897592E-02  -.5321181E-02  -.4729280E-02  -.4447769E-02
  -.4571009E-02  -.4707999E-02  -.4813012E-02  -.5084456E-02  -.5383713E-02
  -.5329010E-02  -.5269900E-02  -.5305940E-02  -.5209118E-02  -.4931010E-02
  -.4341815E-02  -.3646711E-02  -.3285953E-02  -.3168246E-02  -.3089638E-02
  -.2936926E-02  -.2323012E-02  -.1655907E-02  -.1676991E-02  -.2331232E-02
  -.3104894E-02  -.3680845E-02  -.4174245E-02  -.4654723E-02  -.5132577E-02
  -.5567202E-02  -.5734869E-02  -.5690356E-02  -.5642167E-02  -.5348242E-02
  -.4949957E-02  -.4793097E-02  -.4536657E-02  -.4087399E-02  -.3816207E-02
  -.3474281E-02  -.2879048E-02  -.2421981E-02  -.2164892E-02  -.1776198E-02
  -.1119194E-02  -.4490963E-03   .2072692E-03   .7997811E-03   .1190654E-02
   .9717733E-03   .2615297E-03  -.5126725E-03  -.1314038E-02  -.1748354E-02
  -.1983388E-02  -.2137856E-02  -.1940318E-02  -.1428137E-02  -.9090373E-03
  -.5761522E-03  -.2851015E-03  -.2076659E-06   .2131201E-03   .2969177E-03
  -.5679030E-04  -.6427519E-03  -.6024088E-03  -.1864614E-03   .2189628E-03
   .5049266E-03   .6968434E-03   .1220869E-02   .1766469E-02   .2195744E-02
   .2472278E-02   .3019279E-02   .4027247E-02   .4770663E-02   .5373935E-02
   .5666390E-02   .5497860E-02   .5418687E-02   .5331761E-02   .5030672E-02
   .4707718E-02   .4581161E-02   .4658261E-02   .4544893E-02   .4269590E-02
   .4174078E-02   .4071429E-02   .3959770E-02   .3800315E-02   .3496188E-02
   .3388946E-02   .3563763E-02   .3891361E-02   .4262511E-02   .4460717E-02
   .4559253E-02   .4739021E-02   .4782664E-02   .4822912E-02   .4793401E-02
   .4539633E-02   .4504087E-02   .4604633E-02   .4421807E-02   .4089596E-02
   .4062555E-02   .3963739E-02   .3632621E-02   .3405157E-02   .3043742E-02
   .2671996E-02   .2456288E-02   .2308832E-02   .2213622E-02   .2284891E-02
   .2458009E-02   .2470747E-02   .2504444E-02   .2553888E-02   .2688793E-02
   .2958446E-02   .3098478E-02   .3315449E-02   .3670188E-02   .4146194E-02
   .4947028E-02   .5588768E-02   .5913041E-02   .6083437E-02   .6087549E-02
   .6184750E-02   .6332181E-02   .6599753E-02   .6738928E-02   .6862379E-02
   .7373627E-02   .8003136E-02   .8469788E-02   .8403597E-02   .7998631E-02
   .7783164E-02   .7709768E-02   .7712637E-02   .7744003E-02   .7627039E-02
   .7561695E-02   .7391008E-02   .7036525E-02   .6988040E-02   .7113523E-02
   .7047719E-02   .7002387E-02   .7206077E-02   .7479084E-02   .7566164E-02
   .7560918E-02   .7815792E-02   .7980869E-02   .7922133E-02   .7907339E-02
   .7649675E-02   .7382269E-02   .7275356E-02   .6988212E-02   .6620789E-02
   .6326718E-02   .5849560E-02   .5183405E-02   .4614339E-02   .4120121E-02
   .3666671E-02   .3267147E-02   .2907907E-02   .2624587E-02   .2397721E-02
   .2182727E-02   .2196094E-02   .2505880E-02   .2926346E-02   .3364298E-02
   .3501447E-02   .3415802E-02   .3465503E-02   .3583130E-02   .3714212E-02
   .3706148E-02   .3758596E-02   .3975657E-02   .4059821E-02   .4223905E-02
   .4511592E-02   .4936571E-02   .5587270E-02   .6322504E-02   .7059638E-02
   .7683243E-02   .8026674E-02   .8198231E-02   .8503703E-02   .8741872E-02
   .8623091E-02   .8539315E-02   .8344644E-02   .7754365E-02   .7254737E-02
   .7030709E-02   .6871692E-02   .6747354E-02   .6826507E-02   .6836040E-02
   .7043265E-02   .7568809E-02   .7908866E-02   .8488741E-02   .8957289E-02
   .8807164E-02   .8678388E-02   .8460969E-02   .8171053E-02   .8087155E-02
   .7986317E-02   .8016136E-02   .7956944E-02   .7852121E-02   .8065831E-02
   .8379509E-02   .8793375E-02   .9176665E-02   .9469280E-02   .9938713E-02
   .1050257E-01   .1118059E-01   .1163612E-01   .1171137E-01   .1165603E-01
   .1149674E-01   .1141015E-01   .1117876E-01   .1088378E-01   .1083047E-01
   .1084082E-01   .1070455E-01   .1044785E-01   .1027376E-01   .1023180E-01
   .1016500E-01   .1008544E-01   .1022676E-01   .1056968E-01   .1071235E-01
   .1086098E-01   .1120754E-01   .1148430E-01   .1162954E-01   .1135690E-01
   .1099076E-01   .1084010E-01   .1059048E-01   .1016075E-01   .9625421E-02
   .9196362E-02   .8962477E-02   .8720754E-02   .8724023E-02   .9085163E-02
   .9255591E-02   .9417716E-02   .9650055E-02   .9618621E-02   .9641005E-02
   .9769313E-02   .1008697E-01   .1056876E-01   .1087347E-01   .1097389E-01
   .1087528E-01   .1060041E-01   .1021975E-01   .9811223E-02   .9588006E-02
   .9669593E-02   .9724840E-02   .9830599E-02   .1002649E-01   .1018083E-01
   .1015273E-01   .9766810E-02   .9443735E-02   .9112560E-02   .8838644E-02
   .8987744E-02   .9180460E-02   .9098448E-02   .9068237E-02   .9099902E-02
   .9092611E-02   .9330956E-02   .9370529E-02   .9199210E-02   .9188011E-02
   .9104121E-02   .9097360E-02   .9236814E-02   .9126865E-02   .9066547E-02
   .9389294E-02   .9562266E-02   .9596138E-02   .9694279E-02   .9694350E-02
   .9443867E-02   .9042983E-02   .8889491E-02   .8876890E-02   .8834295E-02
   .8832033E-02   .8896251E-02   .8841464E-02   .8644156E-02   .8359943E-02
   .7955729E-02   .7559719E-02   .7202777E-02   .6893963E-02   .6514670E-02
   .6134843E-02   .5756655E-02   .5140128E-02   .4344436E-02   .3826994E-02
   .3712502E-02   .3685939E-02   .3942767E-02   .4275688E-02   .4600598E-02
   .4933933E-02   .5221836E-02   .5784965E-02   .6062605E-02   .6214092E-02
   .6573744E-02   .6628671E-02   .6484046E-02   .6216070E-02   .5775201E-02
   .5341361E-02   .5089194E-02   .4970304E-02   .4860888E-02   .4760021E-02
   .4680402E-02   .4675267E-02   .4624058E-02   .4779553E-02   .4931467E-02
   .4851825E-02   .4935811E-02   .4996968E-02   .4910893E-02   .4768353E-02
   .4712131E-02   .4704728E-02   .4524088E-02   .4496796E-02   .4600664E-02
   .4621453E-02   .4597532E-02   .4400609E-02   .4046952E-02   .3780870E-02
   .3811008E-02   .3854433E-02   .3812447E-02   .3700263E-02   .3539084E-02
   .3290768E-02   .2910451E-02   .2526376E-02   .2272730E-02   .2110198E-02
   .1722081E-02   .1607767E-02   .1901731E-02   .2324650E-02   .2832664E-02
   .3174579E-02   .3635541E-02   .4301075E-02   .4745252E-02   .4686239E-02
   .4495556E-02   .4296530E-02   .3958041E-02   .3684241E-02   .3241466E-02
   .2625949E-02   .2134128E-02   .1731268E-02   .1456748E-02   .1528553E-02
   .1603260E-02   .1605841E-02   .1817482E-02   .2016583E-02   .2243965E-02
   .2501646E-02   .2535717E-02   .2316497E-02   .1988776E-02   .1640275E-02
   .1207410E-02   .7353992E-03   .4868037E-03   .5952691E-03   .8634580E-03
   .1216111E-02   .1634658E-02   .2176368E-02   .2819214E-02   .3114510E-02
   .3241237E-02   .3517616E-02   .3674917E-02   .3643978E-02   .3464794E-02
   .3070557E-02   .2663431E-02   .2489546E-02   .2327902E-02   .2057240E-02
   .1928926E-02   .1950978E-02   .2174248E-02   .2790637E-02   .3367864E-02
   .3773978E-02   .4161557E-02   .4337346E-02   .4350641E-02   .4153451E-02
   .3785244E-02   .3571503E-02   .3501810E-02   .3135369E-02   .2573131E-02
   .2028731E-02   .1427931E-02   .1000067E-02   .6429762E-03   .4154963E-03
   .1199017E-03  -.4738417E-03  -.8533244E-03  -.1188857E-02  -.1433932E-02
  -.1460348E-02  -.1578590E-02  -.1714283E-02  -.1865602E-02  -.1954850E-02
  -.2114829E-02  -.2430043E-02  -.2520036E-02  -.2440836E-02  -.2349312E-02
  -.2019816E-02  -.1902125E-02  -.2120109E-02  -.2242765E-02  -.2490139E-02
  -.2743760E-02  -.2780300E-02  -.2873239E-02  -.2891147E-02  -.2684246E-02
  -.2645954E-02  -.2678070E-02  -.2715607E-02  -.2864688E-02  -.2753469E-02
  -.2539219E-02  -.2561183E-02  -.2470873E-02  -.2262488E-02  -.2101576E-02
  -.1825448E-02  -.1571825E-02  -.1392531E-02  -.1249814E-02  -.1154100E-02
  -.1130924E-02  -.9330778E-03  -.3327145E-03   .1252214E-03   .2488125E-03
   .3234075E-03   .2174672E-03   .7727510E-04   .1329758E-07  -.1853995E-03
  -.4032090E-03  -.9359852E-03  -.1641778E-02  -.2027478E-02  -.2847302E-02
  -.3108795E-02  -.3475613E-02  -.3982382E-02  -.4251570E-02  -.4437500E-02
  -.4612428E-02  -.4735106E-02  -.4757065E-02  -.4609780E-02  -.4382115E-02
  -.4153362E-02  -.4067755E-02  -.4158997E-02  -.4419512E-02  -.4685343E-02
  -.4964792E-02  -.5336423E-02  -.5860359E-02  -.6359860E-02  -.6629916E-02
  -.6995567E-02  -.7244434E-02  -.7072529E-02  -.7116188E-02  -.7426282E-02
  -.7764984E-02  -.8417342E-02  -.8952258E-02  -.9052803E-02  -.9090543E-02
  -.9259166E-02  -.9379034E-02  -.9314242E-02  -.9287708E-02  -.9234115E-02
  -.9070671E-02  -.9074015E-02  -.8920072E-02  -.8689549E-02  -.8703281E-02
  -.8648138E-02  -.8596954E-02  -.8592700E-02  -.8695132E-02  -.8916492E-02
  -.9008646E-02  -.8831567E-02  -.8304579E-02  -.7996053E-02  -.8011599E-02
  -.7860679E-02  -.7736393E-02  -.7479537E-02  -.7196066E-02  -.7098647E-02
  -.7084758E-02  -.7244688E-02  -.7298316E-02  -.7335108E-02  -.7570267E-02
  -.7989567E-02  -.8272548E-02  -.8156578E-02  -.8100824E-02  -.8370991E-02
  -.8830029E-02  -.9242278E-02  -.9571847E-02  -.9743763E-02  -.9753510E-02
  -.9901461E-02  -.1000206E-01  -.9955023E-02  -.1003386E-01  -.1032024E-01
  -.1073674E-01  -.1109862E-01  -.1119409E-01  -.1111833E-01  -.1102418E-01
  -.1097633E-01  -.1086576E-01  -.1069882E-01  -.1070476E-01  -.1094434E-01
  -.1125302E-01  -.1142920E-01  -.1159842E-01  -.1169264E-01  -.1174457E-01
  -.1190707E-01  -.1188571E-01  -.1184982E-01  -.1212423E-01  -.1227412E-01
  -.1222756E-01  -.1196163E-01  -.1134564E-01  -.1068875E-01  -.1031890E-01
  -.1010036E-01  -.9759316E-02  -.9609158E-02  -.9538125E-02  -.9260101E-02
  -.9123378E-02  -.9210203E-02  -.9082834E-02  -.8773628E-02  -.8351639E-02
  -.8061514E-02  -.8194588E-02  -.8150756E-02  -.8132082E-02  -.8225509E-02
  -.8056885E-02  -.7967688E-02  -.7857266E-02  -.7627746E-02  -.7285640E-02
  -.6938849E-02  -.6558421E-02  -.5969748E-02  -.5665034E-02  -.5814923E-02
  -.6224563E-02  -.6646111E-02  -.6801384E-02  -.6742063E-02  -.6596829E-02
  -.6607485E-02  -.6769624E-02  -.6799786E-02  -.6783330E-02  -.6791149E-02
  -.6633931E-02  -.6362909E-02  -.6323193E-02  -.6478205E-02  -.6286196E-02
  -.5869824E-02  -.5471085E-02  -.4972945E-02  -.4621596E-02  -.4341670E-02
  -.4284322E-02  -.4430633E-02  -.4478733E-02  -.4492602E-02  -.4413438E-02
  -.4531071E-02  -.4617433E-02  -.4553971E-02  -.4574325E-02  -.4341191E-02
  -.4110590E-02  -.4182507E-02  -.4338413E-02  -.4583894E-02  -.4739807E-02
  -.4914523E-02  -.5272742E-02  -.5601209E-02  -.5658773E-02  -.5556820E-02
  -.5440139E-02  -.5084108E-02  -.5007024E-02  -.5218060E-02  -.5264497E-02
  -.5260026E-02  -.5353233E-02  -.5561606E-02  -.5820499E-02  -.6027794E-02
  -.5953535E-02  -.5779367E-02  -.5798861E-02  -.5975159E-02  -.6013947E-02
  -.5848457E-02  -.5657782E-02  -.5490196E-02  -.5512517E-02  -.5386650E-02
  -.5068276E-02  -.4873183E-02  -.4569662E-02  -.4434368E-02  -.4602731E-02
  -.4643786E-02  -.4657409E-02  -.4673538E-02  -.4564082E-02  -.4546752E-02
  -.4593214E-02  -.4582963E-02  -.4557546E-02  -.4641775E-02  -.4558424E-02
  -.4315709E-02  -.4305935E-02  -.4258272E-02  -.4271101E-02  -.4383878E-02
  -.4306619E-02  -.4152374E-02  -.3791448E-02  -.3327916E-02  -.3094425E-02
  -.2986351E-02  -.2933314E-02  -.3050677E-02  -.3157902E-02  -.3178436E-02
  -.3212261E-02  -.3187202E-02  -.3270691E-02  -.3353787E-02  -.3341073E-02
  -.3397213E-02  -.3328696E-02  -.3052113E-02  -.2886296E-02  -.2925765E-02
  -.2846460E-02  -.2552275E-02  -.2239318E-02  -.2076668E-02  -.2119003E-02
  -.2150308E-02  -.2142445E-02  -.2397734E-02  -.2716144E-02  -.2904526E-02
  -.3127205E-02  -.3422063E-02  -.3607877E-02  -.3615373E-02  -.3679947E-02
  -.3575340E-02  -.3223698E-02  -.3044498E-02  -.3055382E-02  -.3140199E-02
  -.3091354E-02  -.2821892E-02  -.2755251E-02  -.2775416E-02  -.2734376E-02
  -.2858658E-02  -.2970744E-02  -.3055831E-02  -.3040070E-02  -.2722003E-02
  -.2417208E-02  -.2266148E-02  -.1963731E-02  -.1649667E-02  -.1413475E-02
  -.1239254E-02  -.1379279E-02  -.1732997E-02  -.1948425E-02  -.2165284E-02
  -.2469101E-02  -.2656679E-02  -.2885405E-02  -.2933033E-02  -.2814747E-02
  -.2900860E-02  -.2898224E-02  -.2530558E-02  -.2137790E-02  -.1857139E-02
  -.1517936E-02  -.1237925E-02  -.9347234E-03  -.5797282E-03  -.2464032E-03
  -.1239343E-04   .6667961E-04   .2408513E-04  -.1456908E-03  -.2083697E-03
  -.1262096E-03  -.1353715E-03  -.2418151E-03  -.3358985E-03  -.3759367E-03
  -.3975425E-03  -.4845026E-03  -.5292888E-03  -.5179632E-03  -.5288553E-03
  -.6016143E-03  -.6409517E-03  -.7075758E-03  -.9304243E-03  -.1025946E-02
  -.1080396E-02  -.1276055E-02  -.1387913E-02  -.1430483E-02  -.1415227E-02
  -.1298222E-02  -.1256211E-02  -.1024642E-02  -.7127205E-03  -.4883165E-03
  -.2246777E-03  -.1248090E-03   .9016415E-04   .1689385E-03   .1466736E-03
   .4381726E-03   .6972771E-03   .8033860E-03   .8738850E-03   .1122000E-02
   .1276263E-02   .1440578E-02   .1891649E-02   .2248801E-02   .2339672E-02
   .2255053E-02   .2273773E-02   .2464705E-02   .2634854E-02   .2709777E-02
   .2810759E-02   .2857410E-02   .2820552E-02   .2711124E-02   .2685076E-02
   .2782316E-02   .2811057E-02   .2972368E-02   .2973768E-02   .2855721E-02
   .2912287E-02   .3093325E-02   .3333567E-02   .3435843E-02   .3565452E-02
   .3646802E-02   .3701582E-02   .3734829E-02   .3638556E-02   .3463568E-02
   .3216415E-02   .3005421E-02   .2851034E-02   .2902904E-02   .2974647E-02
   .3066725E-02   .3241841E-02   .3402234E-02   .3606903E-02   .3724681E-02
   .3848442E-02   .3951744E-02   .3942152E-02   .3921282E-02   .3932915E-02
   .3957499E-02   .3911760E-02   .3811438E-02   .3859260E-02   .4013532E-02
   .3974252E-02   .3819864E-02   .3848013E-02   .3929736E-02   .3887507E-02
   .3956907E-02   .4050825E-02   .4019840E-02   .4027562E-02   .3986893E-02
   .3899443E-02   .3867368E-02   .3866267E-02   .3739028E-02   .3582799E-02
   .3508144E-02   .3380862E-02   .3352005E-02   .3476035E-02   .3557110E-02
   .3626550E-02   .3837349E-02   .3868542E-02   .3759067E-02   .3703473E-02
   .3655114E-02   .3746988E-02   .3819382E-02   .3834682E-02   .3826577E-02
   .3741492E-02   .3737193E-02   .3752500E-02   .3666723E-02   .3558757E-02
   .3498009E-02   .3534412E-02   .3621367E-02   .3779875E-02   .3874716E-02
   .3954721E-02   .4082365E-02   .4103335E-02   .4202332E-02   .4371409E-02
   .4439232E-02   .4523423E-02   .4683731E-02   .4634640E-02   .4519536E-02
   .4533426E-02   .4461589E-02   .4494961E-02   .4565232E-02   .4409644E-02
   .4362343E-02   .4381638E-02   .4201609E-02   .4119545E-02   .4100971E-02
   .4055018E-02   .4096658E-02   .4022116E-02   .3974036E-02   .4006474E-02
   .3922362E-02   .3852511E-02   .3748256E-02   .3600213E-02   .3446966E-02
   .3388793E-02   .3413796E-02   .3382292E-02   .3318698E-02   .3180177E-02
   .3088577E-02   .3046799E-02   .3038123E-02   .3032437E-02   .2914222E-02
   .2744945E-02   .2625083E-02   .2629332E-02   .2619127E-02   .2535739E-02
   .2643612E-02   .2800238E-02   .2807283E-02   .2809190E-02   .2876913E-02
   .2991935E-02   .3104129E-02   .3292706E-02   .3436965E-02   .3464806E-02
   .3549169E-02   .3681581E-02   .3853406E-02   .3970259E-02   .3961258E-02
   .3983646E-02   .4078889E-02   .4205169E-02   .4328875E-02   .4435534E-02
   .4481657E-02   .4451439E-02   .4457459E-02   .4471806E-02   .4347934E-02
   .4104473E-02   .3851488E-02   .3568412E-02   .3254540E-02   .2995122E-02
   .2765866E-02   .2625213E-02   .2648802E-02   .2722122E-02   .2860350E-02
   .3034939E-02   .3147240E-02   .3251732E-02   .3339062E-02   .3412447E-02
   .3459122E-02   .3468576E-02   .3444278E-02   .3337211E-02   .3191532E-02
   .3025951E-02   .2905370E-02   .2827956E-02   .2698129E-02   .2564897E-02
   .2514775E-02   .2554227E-02   .2582660E-02   .2582146E-02   .2575403E-02
   .2523238E-02   .2490415E-02   .2466563E-02   .2437858E-02   .2443891E-02
   .2479951E-02   .2501405E-02   .2444555E-02   .2432144E-02   .2430882E-02
   .2395777E-02   .2383309E-02   .2354010E-02   .2334180E-02   .2301458E-02
   .2244042E-02   .2173771E-02   .2095800E-02   .2028430E-02   .1976271E-02
   .1956434E-02   .1881431E-02   .1731605E-02   .1595063E-02   .1470845E-02
   .1402721E-02   .1385566E-02   .1375817E-02   .1425564E-02   .1498830E-02
   .1510073E-02   .1519385E-02   .1526722E-02   .1463686E-02   .1402040E-02
   .1329308E-02   .1255636E-02   .1256483E-02   .1275548E-02   .1282182E-02
   .1244120E-02   .1148439E-02   .1049109E-02   .9971321E-03   .9695182E-03
   .9203481E-03   .8702263E-03   .8025182E-03   .7342966E-03   .7173284E-03
   .7244540E-03   .7155635E-03   .7169617E-03   .6972820E-03   .6634854E-03
   .6683635E-03   .6496452E-03   .6312646E-03   .6272465E-03   .5900611E-03
   .5610470E-03   .5308101E-03   .4867221E-03   .4611263E-03   .4299882E-03
   .4099643E-03   .4073756E-03   .4196683E-03   .4326486E-03   .3843330E-03
   .3235613E-03   .2629795E-03   .1806464E-03   .1014484E-03   .3289484E-04
   .3048258E-05  -.1120667E-04  -.4664720E-04  -.9098408E-04  -.1308463E-03
  -.1645547E-03  -.1963103E-03  -.1911193E-03  -.1731756E-03  -.1951690E-03
  -.2242730E-03  -.2579537E-03  -.2987145E-03  -.3442525E-03  -.3856594E-03
  -.4160444E-03  -.4458301E-03  -.4529199E-03  -.4557568E-03  -.4781809E-03
  -.5123815E-03  -.5530602E-03  -.5794174E-03  -.5935193E-03  -.5946689E-03
  -.5911675E-03  -.6082789E-03  -.6328975E-03  -.6469879E-03  -.6658459E-03
  -.6866953E-03  -.7012241E-03  -.7275539E-03  -.7430382E-03  -.7469529E-03
  -.7536220E-03  -.7492876E-03  -.7456501E-03  -.7442743E-03  -.7322036E-03
  -.7258778E-03  -.7385026E-03  -.7443254E-03  -.7443425E-03  -.7557584E-03
  -.7688572E-03  -.7778977E-03  -.7871838E-03  -.7991796E-03  -.8122915E-03
  -.8284745E-03  -.8336757E-03  -.8381978E-03  -.8495534E-03  -.8553786E-03
  -.8648303E-03  -.8705236E-03  -.8703739E-03  -.8658229E-03  -.8558754E-03
  -.8550094E-03  -.8558501E-03  -.8586097E-03  -.8612457E-03  -.8586433E-03
  -.8620222E-03  -.8628126E-03  -.8578318E-03  -.8574062E-03  -.8603615E-03
  -.8566370E-03  -.8500116E-03  -.8472503E-03  -.8447216E-03  -.8373732E-03
  -.8322571E-03  -.8314872E-03  -.8252646E-03  -.8167200E-03  -.8090899E-03
  -.8048461E-03  -.7974057E-03  -.7892242E-03  -.7825122E-03  -.7733895E-03
  -.7686889E-03  -.7581056E-03  -.7508505E-03  -.7452090E-03  -.7352859E-03
  -.7323912E-03  -.7295403E-03  -.7267027E-03  -.7234798E-03  -.7186533E-03
  -.7093965E-03  -.6988468E-03  -.6956149E-03  -.6910858E-03  -.6820533E-03
  -.6767580E-03  -.6698459E-03  -.6601992E-03  -.6569199E-03  -.6514193E-03
  -.6394834E-03  -.6323364E-03  -.6233650E-03  -.6105017E-03  -.6014662E-03
  -.5929177E-03  -.5833629E-03  -.5745197E-03  -.5670757E-03  -.5577116E-03
  -.5496049E-03  -.5445370E-03  -.5387749E-03  -.5312604E-03  -.5221465E-03
  -.5144090E-03  -.5077317E-03  -.5000014E-03  -.4908160E-03  -.4813964E-03
  -.4727277E-03  -.4649292E-03  -.4595980E-03  -.4513162E-03  -.4413750E-03
  -.4353851E-03  -.4275926E-03  -.4197042E-03  -.4134915E-03  -.4049747E-03
  -.3963200E-03  -.3900455E-03  -.3823126E-03  -.3734653E-03  -.3671961E-03
  -.3611012E-03  -.3547773E-03  -.3477959E-03  -.3408951E-03  -.3343783E-03
  -.3278141E-03  -.3224777E-03  -.3163340E-03  -.3099937E-03  -.3048291E-03
  -.2992349E-03  -.2929805E-03  -.2879232E-03  -.2829363E-03  -.2775351E-03
  -.2721730E-03  -.2662929E-03  -.2615184E-03  -.2568458E-03  -.2513932E-03
  -.2470499E-03  -.2431986E-03  -.2380141E-03  -.2334192E-03  -.2297384E-03
  -.2254622E-03  -.2213189E-03  -.2174827E-03  -.2136984E-03  -.2097785E-03
  -.2063085E-03  -.2030631E-03  -.1995767E-03  -.1963036E-03  -.1931511E-03
  -.1901314E-03  -.1872882E-03  -.1844474E-03  -.1817004E-03  -.1790095E-03
  -.1763709E-03  -.1739643E-03  -.1716360E-03  -.1694393E-03  -.1673628E-03
  -.1651911E-03  -.1631606E-03  -.1613128E-03  -.1595156E-03  -.1578310E-03
  -.1562008E-03  -.1546226E-03  -.1531678E-03  -.1518443E-03  -.1505841E-03
  -.1493897E-03  -.1483137E-03  -.1473377E-03  -.1464530E-03  -.1456525E-03
  -.1449374E-03  -.1443189E-03  -.1437907E-03  -.1433492E-03
