# Supplementary material for: Earthquake Response Analysis of Tall Reinforced Concrete Chimneys considering Eccentricity
Source: Hindawi journal article supplement (doi:10.1155/2020/1417969), 2020-03-11
Supplement: f1 [file 1417969.f1.zip › 1417969.f1/Four kinds of earthquake records/Soft soil/IMPVALL H-E03140.txt]

PEER STRONG MOTION DATABASE RECORD. PROCESSING BY PACIFIC ENGINEERING.
IMPERIAL VALLEY 10/15/79 2316, EL CENTRO ARRAY #3, 140 (USGS STATION 5057)
ACCELERATION TIME HISTORY IN UNITS OF G. FILTER POINTS: HP=0.1 Hz LP=40.0 Hz
NPTS=  7909, DT= .00500 SEC
  -.4370070E-03  -.5605783E-03  -.5433194E-03  -.3231908E-03  -.3470848E-03
  -.3622091E-03  -.3758996E-03  -.3878934E-03  -.3979789E-03  -.4046655E-03
  -.4052539E-03  -.3988932E-03  -.3878160E-03  -.3748339E-03  -.3617104E-03
  -.3484963E-03  -.3365872E-03  -.3247946E-03  -.3094447E-03  -.2918230E-03
  -.2753664E-03  -.2617954E-03  -.2519261E-03  -.2442061E-03  -.2363952E-03
  -.2263828E-03  -.2110618E-03  -.1928721E-03  -.1787870E-03  -.1703361E-03
  -.1638885E-03  -.1577670E-03  -.1531732E-03  -.1494946E-03  -.1461665E-03
  -.1459492E-03  -.1498836E-03  -.1562540E-03  -.1650758E-03  -.1750963E-03
  -.1806282E-03  -.1796527E-03  -.1784291E-03  -.1805693E-03  -.1814204E-03
  -.1817251E-03  -.1891915E-03  -.2060669E-03  -.2297230E-03  -.2589856E-03
  -.2921374E-03  -.3256803E-03  -.3625226E-03  -.4036674E-03  -.4391340E-03
  -.4641565E-03  -.4838403E-03  -.4978529E-03  -.4964820E-03  -.4730483E-03
  -.4321672E-03  -.3928274E-03  -.3772913E-03  -.3852959E-03  -.3940818E-03
  -.3922996E-03  -.3965348E-03  -.4251485E-03  -.4717049E-03  -.5114750E-03
  -.5242668E-03  -.5039437E-03  -.4507471E-03  -.3751603E-03  -.3046541E-03
  -.2594317E-03  -.2363456E-03  -.2154970E-03  -.1801727E-03  -.1385763E-03
  -.1082969E-03  -.9591840E-04  -.1086565E-03  -.1607886E-03  -.2617545E-03
  -.4085187E-03  -.5822397E-03  -.7538805E-03  -.9055134E-03  -.1042546E-02
  -.1154800E-02  -.1190103E-02  -.1093406E-02  -.8526158E-03  -.5040840E-03
  -.1210152E-03   .1898122E-03   .3449213E-03   .3480906E-03   .2751798E-03
   .2151721E-03   .2254862E-03   .2771531E-03   .2387068E-03   .4935161E-04
  -.1747948E-03  -.3213248E-03  -.4059792E-03  -.4921668E-03  -.5892158E-03
  -.6525055E-03  -.6608557E-03  -.6407213E-03  -.6308204E-03  -.6176723E-03
  -.5484694E-03  -.4588421E-03  -.4554085E-03  -.5616743E-03  -.6982251E-03
  -.7794650E-03  -.7666289E-03  -.6648645E-03  -.4940701E-03  -.2788762E-03
  -.7016313E-04   .8284421E-04   .1856033E-03   .2824251E-03   .3978593E-03
   .5257033E-03   .6205632E-03   .6145171E-03   .4670761E-03   .1799800E-03
  -.1826945E-03  -.5442889E-03  -.8851493E-03  -.1208457E-02  -.1484129E-02
  -.1653362E-02  -.1632951E-02  -.1347455E-02  -.8788975E-03  -.4593668E-03
  -.2520008E-03  -.2174035E-03  -.1834268E-03  -.4300858E-04   .1600423E-03
   .3218438E-03   .3788787E-03   .3186809E-03   .1578612E-03  -.6236088E-04
  -.2849706E-03  -.4717621E-03  -.6363555E-03  -.8051036E-03  -.9787964E-03
  -.1147837E-02  -.1257286E-02  -.1201234E-02  -.9093221E-03  -.4224587E-03
   .7438077E-04   .3731811E-03   .4224062E-03   .2903523E-03   .3116135E-04
  -.2966251E-03  -.6015500E-03  -.8280760E-03  -.9660649E-03  -.1039243E-02
  -.1117475E-02  -.1251737E-02  -.1361779E-02  -.1360665E-02  -.1338401E-02
  -.1339855E-02  -.1189970E-02  -.7725521E-03  -.2117256E-03   .2861108E-03
   .5508508E-03   .4732936E-03   .1636014E-03  -.6855920E-04  -.5628768E-04
   .1306424E-03   .3703425E-03   .5669416E-03   .6299570E-03   .4817469E-03
   .7985581E-05  -.8747650E-03  -.1933294E-02  -.2671798E-02  -.2760933E-02
  -.2150789E-02  -.9607853E-03   .3620870E-03   .1221096E-02   .1444277E-02
   .1226260E-02   .6845602E-03  -.1111985E-03  -.9391075E-03  -.1556134E-02
  -.1889799E-02  -.1970115E-02  -.1770008E-02  -.1247207E-02  -.4559645E-03
   .4170294E-03   .1088085E-02   .1453321E-02   .1697328E-02   .1906828E-02
   .1929888E-02   .1679833E-02   .1283017E-02   .9162842E-03   .6010586E-03
   .1405166E-03  -.7535141E-03  -.2070834E-02  -.3398887E-02  -.4402957E-02
  -.4949599E-02  -.4902941E-02  -.4100610E-02  -.2542981E-02  -.7319032E-03
   .6712202E-03   .1475941E-02   .1873791E-02   .2032477E-02   .2063679E-02
   .2162464E-02   .2519895E-02   .3112275E-02   .3655087E-02   .3851182E-02
   .3459069E-02   .2234900E-02   .3538588E-03  -.1447646E-02  -.2482652E-02
  -.2613236E-02  -.2231835E-02  -.1821895E-02  -.1586224E-02  -.1452734E-02
  -.1286377E-02  -.1077104E-02  -.8844002E-03  -.7156403E-03  -.5995991E-03
  -.5932479E-03  -.6291497E-03  -.6197494E-03  -.6308519E-03  -.7694998E-03
  -.1054405E-02  -.1431496E-02  -.1729091E-02  -.1580005E-02  -.7824826E-03
   .3827405E-03   .1484146E-02   .2211834E-02   .2434997E-02   .2289048E-02
   .2084531E-02   .2063806E-02   .2072745E-02   .1678970E-02   .7464775E-03
  -.4305983E-03  -.1523727E-02  -.2404354E-02  -.3008054E-02  -.3346322E-02
  -.3519212E-02  -.3484720E-02  -.3245476E-02  -.3093869E-02  -.3330147E-02
  -.3882908E-02  -.4230561E-02  -.3963469E-02  -.3117266E-02  -.1832810E-02
  -.2165464E-04   .2614667E-02   .5727131E-02   .7975007E-02   .8249807E-02
   .6633717E-02   .4080203E-02   .1518853E-02  -.6066300E-03  -.2019905E-02
  -.2474197E-02  -.2116289E-02  -.1469861E-02  -.9849055E-03  -.6898616E-03
  -.2747252E-03   .4072225E-03   .1137233E-02   .1603202E-02   .1403724E-02
   .2486402E-03  -.1586731E-02  -.3583072E-02  -.5454521E-02  -.7049829E-02
  -.8092656E-02  -.8276266E-02  -.7384570E-02  -.5371049E-02  -.2692193E-02
  -.2170738E-03   .1360605E-02   .2052485E-02   .2454281E-02   .3120153E-02
   .4219858E-02   .5444143E-02   .6530349E-02   .7573350E-02   .8300174E-02
   .8118351E-02   .7027573E-02   .5493462E-02   .3769011E-02   .2020481E-02
   .5216357E-03  -.5833405E-03  -.1178494E-02  -.1136803E-02  -.1010483E-02
  -.1744258E-02  -.3464375E-02  -.5589517E-02  -.7522839E-02  -.8782778E-02
  -.8945843E-02  -.7687604E-02  -.5113774E-02  -.2055092E-02   .1830257E-03
   .1080173E-02   .1604702E-02   .2860916E-02   .4901763E-02   .7008648E-02
   .8297745E-02   .8112769E-02   .6351191E-02   .3608540E-02   .8268741E-03
  -.1224100E-02  -.2114649E-02  -.1970535E-02  -.1478722E-02  -.1394438E-02
  -.1958099E-02  -.2739546E-02  -.3074860E-02  -.2299019E-02  -.2124991E-03
   .2388457E-02   .4176507E-02   .4457130E-02   .3661553E-02   .2322402E-02
   .2270752E-03  -.2994643E-02  -.6836934E-02  -.9855214E-02  -.1061837E-01
  -.8749787E-02  -.5145700E-02  -.1302505E-02   .1546166E-02   .2936328E-02
   .3095611E-02   .2650298E-02   .2281306E-02   .2507744E-02   .3563610E-02
   .5018991E-02   .5731493E-02   .4948831E-02   .3100414E-02   .1211610E-02
  -.2655695E-04  -.6475357E-03  -.9751317E-03  -.1066412E-02  -.6488138E-03
   .4648301E-03   .2022128E-02   .3293866E-02   .3404440E-02   .1984498E-02
  -.6090038E-03  -.3579657E-02  -.6409312E-02  -.9012610E-02  -.1084491E-01
  -.1112507E-01  -.9735569E-02  -.6942108E-02  -.3174628E-02   .4689219E-03
   .2911994E-02   .4135758E-02   .4525961E-02   .4342714E-02   .3960066E-02
   .3797665E-02   .3990887E-02   .4438818E-02   .4955836E-02   .4915646E-02
   .3585272E-02   .1017353E-02  -.1996001E-02  -.4654063E-02  -.6577931E-02
  -.7556857E-02  -.7345690E-02  -.5951031E-02  -.3830637E-02  -.1733016E-02
  -.1772633E-03   .7389218E-03   .1016634E-02   .7307547E-03   .1264014E-03
  -.8260143E-03  -.2270702E-02  -.3920184E-02  -.5307789E-02  -.6147940E-02
  -.6443256E-02  -.6114154E-02  -.4922450E-02  -.2867247E-02  -.3686177E-03
   .2031073E-02   .3949408E-02   .5013691E-02   .5015911E-02   .4145546E-02
   .2993816E-02   .1837429E-02   .2624015E-03  -.1894130E-02  -.3869534E-02
  -.4613321E-02  -.3977514E-02  -.2723752E-02  -.1645239E-02  -.1162545E-02
  -.1246497E-02  -.1438375E-02  -.1245981E-02  -.8211893E-03  -.8382569E-03
  -.1525404E-02  -.2645419E-02  -.3742906E-02  -.4147835E-02  -.3464134E-02
  -.1823089E-02  -.2403962E-04   .9397465E-03   .8801008E-03   .3762545E-03
   .2265099E-03   .8343916E-03   .1974036E-02   .3397506E-02   .4747741E-02
   .5545123E-02   .5724371E-02   .5605842E-02   .5686792E-02   .6296628E-02
   .7443672E-02   .8909653E-02   .1011181E-01   .1045560E-01   .9740235E-02
   .7977705E-02   .5428233E-02   .2389882E-02  -.1055518E-02  -.4733844E-02
  -.8297849E-02  -.1142080E-01  -.1382596E-01  -.1517951E-01  -.1520941E-01
  -.1400943E-01  -.1188068E-01  -.8990270E-02  -.5484281E-02  -.1703304E-02
   .1785283E-02   .4468861E-02   .6257580E-02   .7372003E-02   .8243779E-02
   .9042208E-02   .9313968E-02   .8544683E-02   .6492806E-02   .3426321E-02
   .2515142E-03  -.1988211E-02  -.2677701E-02  -.1740498E-02   .5379937E-03
   .3122645E-02   .4381628E-02   .3562514E-02   .1278910E-02  -.1364551E-02
  -.3303149E-02  -.3639293E-02  -.2694263E-02  -.1994966E-02  -.2757502E-02
  -.5370757E-02  -.9316795E-02  -.1309208E-01  -.1514523E-01  -.1515098E-01
  -.1350422E-01  -.1066029E-01  -.7791449E-02  -.5873720E-02  -.4493617E-02
  -.2676971E-02   .1573740E-03   .3799965E-02   .7714864E-02   .1103602E-01
   .1287946E-01   .1333950E-01   .1271151E-01   .1123001E-01   .9429027E-02
   .7754424E-02   .6192295E-02   .4559080E-02   .3045597E-02   .1893467E-02
   .1159184E-02   .6705925E-03   .1174421E-03  -.7694458E-03  -.2071490E-02
  -.3192331E-02  -.3258538E-02  -.2159758E-02  -.6754898E-03   .1984795E-03
  -.9260108E-04  -.1433894E-02  -.2676358E-02  -.2506420E-02  -.1003828E-02
   .9122435E-03   .2577773E-02   .3881371E-02   .5040141E-02   .5999184E-02
   .6413576E-02   .6334680E-02   .6211406E-02   .6382466E-02   .6651708E-02
   .6691022E-02   .6377260E-02   .5232244E-02   .2855235E-02  -.5324625E-03
  -.4382676E-02  -.8084640E-02  -.1060065E-01  -.1092636E-01  -.9006520E-02
  -.5431640E-02  -.1290075E-02   .2128324E-02   .4285486E-02   .5459480E-02
   .6202992E-02   .7082435E-02   .8544321E-02   .1042939E-01   .1190265E-01
   .1214925E-01   .1091576E-01   .8694705E-02   .6358034E-02   .4599047E-02
   .3367583E-02   .2056998E-02   .3899260E-03  -.1378750E-02  -.2710027E-02
  -.3256600E-02  -.3443108E-02  -.4192145E-02  -.6260192E-02  -.9746498E-02
  -.1379120E-01  -.1673799E-01  -.1701362E-01  -.1472305E-01  -.1159161E-01
  -.9293911E-02  -.8430143E-02  -.8439362E-02  -.8479209E-02  -.7956999E-02
  -.6578149E-02  -.4364034E-02  -.1594311E-02   .1198972E-02   .3692889E-02
   .6097886E-02   .8464027E-02   .1033154E-01   .1151232E-01   .1241475E-01
   .1346442E-01   .1478739E-01   .1630292E-01   .1746614E-01   .1741371E-01
   .1553880E-01   .1192140E-01   .7208940E-02   .2235291E-02  -.2105181E-02
  -.5236752E-02  -.7222845E-02  -.8470952E-02  -.9151329E-02  -.8917692E-02
  -.7428740E-02  -.5030049E-02  -.2656543E-02  -.1229733E-02  -.9334767E-03
  -.1097442E-02  -.1027818E-02  -.2797522E-03   .1165623E-02   .2730325E-02
   .4083384E-02   .4985270E-02   .5400610E-02   .5965724E-02   .7406306E-02
   .9901193E-02   .1279277E-01   .1523166E-01   .1649628E-01   .1596158E-01
   .1316304E-01   .8319211E-02   .2598833E-02  -.2751188E-02  -.6724979E-02
  -.8934463E-02  -.9865444E-02  -.1009472E-01  -.9737676E-02  -.8431134E-02
  -.6141914E-02  -.3563450E-02  -.1426028E-02  -.4083960E-03  -.6525614E-03
  -.1422393E-02  -.1834119E-02  -.1381276E-02   .1332975E-03   .2523916E-02
   .5332084E-02   .8065114E-02   .9993930E-02   .1045400E-01   .9504687E-02
   .8067990E-02   .7231050E-02   .7697664E-02   .9217300E-02   .1052502E-01
   .1065278E-01   .9433389E-02   .7267516E-02   .5160746E-02   .4326136E-02
   .5427482E-02   .7844938E-02   .9900808E-02   .1025500E-01   .8999203E-02
   .7098989E-02   .5380166E-02   .4232642E-02   .3625109E-02   .3434515E-02
   .3309696E-02   .2651796E-02   .1445249E-02   .5922396E-03   .7460092E-03
   .1225113E-02   .8411618E-03  -.6933253E-03  -.2498752E-02  -.3497583E-02
  -.2917930E-02  -.5847294E-03   .2632615E-02   .5908393E-02   .9052895E-02
   .1151042E-01   .1256545E-01   .1245435E-01   .1229209E-01   .1332151E-01
   .1582751E-01   .1875665E-01   .2074378E-01   .2087355E-01   .1889354E-01
   .1531012E-01   .1079631E-01   .5787890E-02   .1311932E-02  -.1397466E-02
  -.2628175E-02  -.3852344E-02  -.6227911E-02  -.9771566E-02  -.1302644E-01
  -.1428475E-01  -.1295375E-01  -.9450862E-02  -.5188765E-02  -.2007189E-02
  -.5910259E-03  -.2153442E-03  -.3945249E-04   .1587695E-04  -.8176470E-04
  -.1571848E-03  -.3916985E-03  -.1222129E-02  -.3181187E-02  -.6532198E-02
  -.1059260E-01  -.1384600E-01  -.1493341E-01  -.1346275E-01  -.9973175E-02
  -.5841506E-02  -.2120835E-02   .1036779E-02   .3745637E-02   .6351626E-02
   .9094744E-02   .1192288E-01   .1446966E-01   .1685068E-01   .1947380E-01
   .2192494E-01   .2329456E-01   .2281276E-01   .2048332E-01   .1685761E-01
   .1239154E-01   .7386719E-02   .1928877E-02  -.3907774E-02  -.9464424E-02
  -.1340667E-01  -.1512037E-01  -.1522072E-01  -.1441037E-01  -.1330769E-01
  -.1226173E-01  -.1081591E-01  -.8309972E-02  -.4515653E-02   .2293657E-03
   .5208509E-02   .9800998E-02   .1356701E-01   .1612216E-01   .1719821E-01
   .1692751E-01   .1574729E-01   .1419693E-01   .1272464E-01   .1157339E-01
   .1075988E-01   .1006304E-01   .9261576E-02   .7969896E-02   .5816282E-02
   .2820972E-02  -.5914496E-03  -.3696203E-02  -.5653259E-02  -.5916444E-02
  -.4205743E-02  -.2063793E-03   .5567824E-02   .1176784E-01   .1682687E-01
   .1942314E-01   .1943495E-01   .1739439E-01   .1401279E-01   .1063067E-01
   .8437934E-02   .7524362E-02   .7063240E-02   .6251221E-02   .4686074E-02
   .2416291E-02  -.1010492E-03  -.2408599E-02  -.4017518E-02  -.4490425E-02
  -.3333907E-02  -.1900282E-03   .4260442E-02   .8639658E-02   .1169811E-01
   .1240677E-01   .1064715E-01   .7118778E-02   .2609882E-02  -.1781454E-02
  -.4781910E-02  -.5963825E-02  -.6030400E-02  -.5514493E-02  -.4409103E-02
  -.2540529E-02   .3915345E-03   .4292980E-02   .8619984E-02   .1240819E-01
   .1443234E-01   .1432332E-01   .1244822E-01   .9171622E-02   .4784262E-02
  -.5316006E-03  -.6315919E-02  -.1133604E-01  -.1407664E-01  -.1370182E-01
  -.1066270E-01  -.6747993E-02  -.3854824E-02  -.2561101E-02  -.2094446E-02
  -.1371928E-02   .2901580E-03   .2978776E-02   .6276099E-02   .9145170E-02
   .1056818E-01   .1091260E-01   .1135935E-01   .1238926E-01   .1337110E-01
   .1284143E-01   .9377844E-02   .2495272E-02  -.6724699E-02  -.1557556E-01
  -.2069072E-01  -.2023590E-01  -.1609540E-01  -.1236539E-01  -.1119755E-01
  -.1166641E-01  -.1199633E-01  -.1119669E-01  -.9389083E-02  -.7372724E-02
  -.6069503E-02  -.5808750E-02  -.6476460E-02  -.8062810E-02  -.1006921E-01
  -.1165381E-01  -.1198097E-01  -.1043470E-01  -.7263096E-02  -.3373131E-02
   .6488150E-03   .4656450E-02   .8534966E-02   .1235715E-01   .1579475E-01
   .1749691E-01   .1631335E-01   .1231704E-01   .6968455E-02   .2457726E-02
  -.3012472E-03  -.1869277E-02  -.3049560E-02  -.4440477E-02  -.6207894E-02
  -.8099063E-02  -.9615817E-02  -.1032630E-01  -.9870090E-02  -.8373535E-02
  -.6580085E-02  -.4680470E-02  -.2438352E-02   .8447149E-05   .2056346E-02
   .2922490E-02   .2307316E-02   .6074463E-03  -.1069525E-02  -.1507384E-02
  -.1623706E-03   .2532138E-02   .5298826E-02   .6878808E-02   .6831426E-02
   .5927092E-02   .5281335E-02   .5222047E-02   .5572909E-02   .5979310E-02
   .5735474E-02   .4277457E-02   .1521875E-02  -.2145780E-02  -.5877048E-02
  -.9060889E-02  -.1185848E-01  -.1499042E-01  -.1870291E-01  -.2217007E-01
  -.2428707E-01  -.2427847E-01  -.2202233E-01  -.1782351E-01  -.1203814E-01
  -.5290174E-02   .1340718E-02   .6495529E-02   .9663798E-02   .1130635E-01
   .1212437E-01   .1274675E-01   .1345313E-01   .1436726E-01   .1532179E-01
   .1607664E-01   .1690726E-01   .1786196E-01   .1831070E-01   .1753300E-01
   .1463323E-01   .9322830E-02   .3188048E-02  -.1872090E-02  -.5469523E-02
  -.8118782E-02  -.1055826E-01  -.1352245E-01  -.1724262E-01  -.2090085E-01
  -.2317567E-01  -.2328916E-01  -.2151998E-01  -.1890855E-01  -.1586680E-01
  -.1244150E-01  -.9037598E-02  -.6058908E-02  -.3943145E-02  -.2569885E-02
  -.1469410E-02  -.5709073E-03   .1993629E-03   .8415996E-03   .1084481E-02
   .7345848E-03   .8624439E-05  -.7746501E-03  -.1538500E-02  -.2008193E-02
  -.2076515E-02  -.2078673E-02  -.2375078E-02  -.3572561E-02  -.5746444E-02
  -.8864790E-02  -.1340938E-01  -.1864408E-01  -.2270410E-01  -.2452414E-01
  -.2416632E-01  -.2187812E-01  -.1825086E-01  -.1400095E-01  -.9264163E-02
  -.4464392E-02  -.5387419E-03   .1752556E-02   .1645429E-02  -.7368585E-03
  -.3639037E-02  -.4574588E-02  -.2096694E-02   .3009045E-02   .9006788E-02
   .1388831E-01   .1628830E-01   .1655579E-01   .1560883E-01   .1424385E-01
   .1289054E-01   .1149485E-01   .1009619E-01   .8466442E-02   .6130936E-02
   .3232806E-02   .4312033E-03  -.1320140E-02  -.1889973E-02  -.2304208E-02
  -.3470774E-02  -.5497014E-02  -.7824344E-02  -.9535576E-02  -.9568192E-02
  -.7225655E-02  -.3216213E-02   .5217637E-03   .2598117E-02   .2751159E-02
   .1510602E-02  -.6341788E-03  -.3557971E-02  -.7344269E-02  -.1200429E-01
  -.1722583E-01  -.2211504E-01  -.2488701E-01  -.2477938E-01  -.2280470E-01
  -.2024437E-01  -.1862588E-01  -.1922955E-01  -.2262044E-01  -.2877377E-01
  -.3623687E-01  -.4277643E-01  -.4717740E-01  -.5013939E-01  -.5329947E-01
  -.5767892E-01  -.6355167E-01  -.7039203E-01  -.7645128E-01  -.8023857E-01
  -.8174143E-01  -.8167943E-01  -.8051977E-01  -.7859076E-01  -.7610186E-01
  -.7277652E-01  -.6836237E-01  -.6252123E-01  -.5532675E-01  -.4701652E-01
  -.3701000E-01  -.2432368E-01  -.9106306E-02   .6206914E-02   .1825948E-01
   .2480170E-01   .2687916E-01   .2843815E-01   .3222990E-01   .3846647E-01
   .4617328E-01   .5396076E-01   .6107028E-01   .6661370E-01   .6920934E-01
   .6844220E-01   .6406094E-01   .5581027E-01   .4410367E-01   .2992015E-01
   .1504032E-01   .7542439E-03  -.1240010E-01  -.2387396E-01  -.3402118E-01
  -.4350464E-01  -.5202590E-01  -.5904023E-01  -.6448829E-01  -.6813599E-01
  -.6961968E-01  -.6844949E-01  -.6286620E-01  -.5137747E-01  -.3540246E-01
  -.1659671E-01   .5786100E-02   .3113330E-01   .5554775E-01   .7605277E-01
   .9241624E-01   .1053261E+00   .1164591E+00   .1272282E+00   .1366894E+00
   .1433329E+00   .1463771E+00   .1449609E+00   .1382665E+00   .1251841E+00
   .1047578E+00   .7736532E-01   .4519680E-01   .1173429E-01  -.2005765E-01
  -.4851920E-01  -.7312379E-01  -.9305561E-01  -.1082018E+00  -.1199403E+00
  -.1277120E+00  -.1302012E+00  -.1279829E+00  -.1222485E+00  -.1131475E+00
  -.9965520E-01  -.8162518E-01  -.6143676E-01  -.4093799E-01  -.1833318E-01
   .6707158E-02   .2837318E-01   .4112550E-01   .4592955E-01   .4684397E-01
   .4581448E-01   .4212473E-01   .3534775E-01   .2728703E-01   .2058318E-01
   .1495387E-01   .7253427E-02  -.3733813E-02  -.1533766E-01  -.2417673E-01
  -.2992817E-01  -.3474657E-01  -.4014850E-01  -.4627422E-01  -.5293897E-01
  -.6007870E-01  -.6723233E-01  -.7285310E-01  -.7496530E-01  -.7224629E-01
  -.6404540E-01  -.5009504E-01  -.3152063E-01  -.1175206E-01   .5750014E-02
   .2101662E-01   .3680735E-01   .5479018E-01   .7296208E-01   .8599629E-01
   .9079752E-01   .9020759E-01   .8831496E-01   .8548539E-01   .7978481E-01
   .6974853E-01   .5473056E-01   .3508930E-01   .1169207E-01  -.1476615E-01
  -.4224527E-01  -.6729170E-01  -.8862586E-01  -.1070757E+00  -.1227433E+00
  -.1351741E+00  -.1440361E+00  -.1491599E+00  -.1507253E+00  -.1489895E+00
  -.1446613E+00  -.1384287E+00  -.1303045E+00  -.1208325E+00  -.1105789E+00
  -.9971624E-01  -.8896427E-01  -.7904151E-01  -.6997673E-01  -.6119641E-01
  -.5046626E-01  -.3482656E-01  -.1344308E-01   .1162985E-01   .3625412E-01
   .5829962E-01   .7872678E-01   .9735366E-01   .1139106E+00   .1300809E+00
   .1483289E+00   .1700533E+00   .1929217E+00   .2126954E+00   .2264517E+00
   .2332300E+00   .2340838E+00   .2311184E+00   .2258773E+00   .2182633E+00
   .2071863E+00   .1915824E+00   .1706200E+00   .1434496E+00   .1114661E+00
   .7708375E-01   .3497125E-01  -.2163828E-01  -.8349179E-01  -.1339627E+00
  -.1683557E+00  -.1900856E+00  -.2017263E+00  -.2050679E+00  -.2013568E+00
  -.1918978E+00  -.1805276E+00  -.1721279E+00  -.1672466E+00  -.1620881E+00
  -.1531691E+00  -.1397804E+00  -.1223770E+00  -.9907467E-01  -.6724533E-01
  -.2785198E-01   .1658875E-01   .6386589E-01   .1098527E+00   .1486060E+00
   .1740313E+00   .1840898E+00   .1833133E+00   .1768081E+00   .1665864E+00
   .1535804E+00   .1377772E+00   .1184067E+00   .9628823E-01   .7574857E-01
   .6087914E-01   .4965031E-01   .3705139E-01   .2355153E-01   .1389415E-01
   .8920286E-02   .4787588E-02  -.2111328E-02  -.1238089E-01  -.2368242E-01
  -.3306766E-01  -.3978059E-01  -.4422721E-01  -.4424733E-01  -.3563527E-01
  -.1784217E-01   .3316505E-02   .2037225E-01   .2967763E-01   .3053509E-01
   .2075862E-01  -.1867317E-02  -.3482115E-01  -.7277402E-01  -.1108383E+00
  -.1443579E+00  -.1690273E+00  -.1824774E+00  -.1861020E+00  -.1843472E+00
  -.1810535E+00  -.1769777E+00  -.1709932E+00  -.1629882E+00  -.1546665E+00
  -.1473982E+00  -.1411665E+00  -.1351666E+00  -.1288334E+00  -.1225865E+00
  -.1170581E+00  -.1123660E+00  -.1076847E+00  -.1011140E+00  -.8935379E-01
  -.6978546E-01  -.4483781E-01  -.1856016E-01   .7821884E-02   .3362212E-01
   .5780037E-01   .7985802E-01   .9937041E-01   .1160223E+00   .1306181E+00
   .1433709E+00   .1530470E+00   .1583981E+00   .1578712E+00   .1492952E+00
   .1315765E+00   .1076202E+00   .8188250E-01   .5620730E-01   .3065602E-01
   .6022049E-02  -.1519367E-01  -.2992006E-01  -.3631886E-01  -.3579907E-01
  -.3235287E-01  -.2896809E-01  -.2646810E-01  -.2540932E-01  -.2602613E-01
  -.2799505E-01  -.3062591E-01  -.3233967E-01  -.3166866E-01  -.2863507E-01
  -.2455962E-01  -.2063166E-01  -.1701740E-01  -.1248531E-01  -.6041827E-02
   .2166173E-02   .1059796E-01   .1691686E-01   .2035083E-01   .2102715E-01
   .1843864E-01   .1245562E-01   .4656005E-02  -.2694544E-02  -.8427089E-02
  -.1257153E-01  -.1575404E-01  -.1948536E-01  -.2517278E-01  -.3398536E-01
  -.4622175E-01  -.6015241E-01  -.7351470E-01  -.8397279E-01  -.8983355E-01
  -.9180828E-01  -.9143045E-01  -.8859432E-01  -.8223035E-01  -.7103341E-01
  -.5505682E-01  -.3631367E-01  -.1643695E-01   .4640985E-02   .2663314E-01
   .4615544E-01   .5862811E-01   .6199755E-01   .5571723E-01   .3946504E-01
   .1708598E-01  -.5489799E-02  -.2651848E-01  -.4645344E-01  -.6403301E-01
  -.7752282E-01  -.8684894E-01  -.9318453E-01  -.9723387E-01  -.9862432E-01
  -.9762760E-01  -.9480329E-01  -.8961627E-01  -.8149442E-01  -.6937806E-01
  -.5249804E-01  -.3295450E-01  -.1414171E-01   .1853061E-02   .1399794E-01
   .2246721E-01   .2893268E-01   .3438894E-01   .3854927E-01   .4145239E-01
   .4427440E-01   .4767033E-01   .5056573E-01   .5338197E-01   .5842083E-01
   .6714673E-01   .8101969E-01   .9832906E-01   .1137244E+00   .1247318E+00
   .1328134E+00   .1399672E+00   .1462072E+00   .1501705E+00   .1507723E+00
   .1488759E+00   .1460503E+00   .1427819E+00   .1388376E+00   .1326019E+00
   .1233138E+00   .1112239E+00   .9555240E-01   .7778910E-01   .5995589E-01
   .4174706E-01   .2458200E-01   .1103759E-01   .8170560E-03  -.7368357E-02
  -.1258068E-01  -.1417909E-01  -.1309436E-01  -.9703662E-02  -.3954802E-02
   .3842854E-02   .1309397E-01   .2361551E-01   .3464856E-01   .4477341E-01
   .5299561E-01   .5904182E-01   .6332545E-01   .6517713E-01   .6332571E-01
   .5827517E-01   .5046777E-01   .4021813E-01   .2908029E-01   .1903074E-01
   .1262377E-01   .1044185E-01   .1187981E-01   .1587560E-01   .2106875E-01
   .2691349E-01   .3070702E-01   .2977484E-01   .2584844E-01   .2054215E-01
   .1629442E-01   .1668139E-01   .2063019E-01   .2702177E-01   .3600736E-01
   .4871275E-01   .6487898E-01   .7936827E-01   .9000948E-01   .9890461E-01
   .1068225E+00   .1150199E+00   .1240408E+00   .1319200E+00   .1388528E+00
   .1446443E+00   .1487238E+00   .1519506E+00   .1529140E+00   .1523190E+00
   .1509308E+00   .1476058E+00   .1434299E+00   .1379726E+00   .1315102E+00
   .1249805E+00   .1181828E+00   .1116026E+00   .1039332E+00   .9561905E-01
   .8829613E-01   .8129983E-01   .7459479E-01   .6821549E-01   .6211393E-01
   .5710450E-01   .5290373E-01   .4889398E-01   .4549390E-01   .4230167E-01
   .3935095E-01   .3656602E-01   .3297050E-01   .2941902E-01   .2642274E-01
   .2452547E-01   .2488860E-01   .2677446E-01   .2985713E-01   .3453360E-01
   .3981098E-01   .4632490E-01   .5506630E-01   .6412676E-01   .7404193E-01
   .8578524E-01   .9736647E-01   .1080688E+00   .1169540E+00   .1235163E+00
   .1293380E+00   .1346630E+00   .1381234E+00   .1400859E+00   .1416280E+00
   .1423867E+00   .1419794E+00   .1409140E+00   .1395169E+00   .1372505E+00
   .1342694E+00   .1315313E+00   .1288623E+00   .1259962E+00   .1219145E+00
   .1163928E+00   .1102451E+00   .1009689E+00   .8895414E-01   .7702617E-01
   .6708988E-01   .6007745E-01   .5546171E-01   .5319111E-01   .5193490E-01
   .5054356E-01   .4909072E-01   .4792512E-01   .4679153E-01   .4547382E-01
   .4446660E-01   .4300385E-01   .4116202E-01   .3980329E-01   .3892990E-01
   .3969615E-01   .4162728E-01   .4320086E-01   .4486704E-01   .4594924E-01
   .4725528E-01   .5047736E-01   .5422853E-01   .5854226E-01   .6383844E-01
   .6956619E-01   .7491475E-01   .7932898E-01   .8315523E-01   .8526063E-01
   .8432465E-01   .8050897E-01   .7414582E-01   .6519423E-01   .5228675E-01
   .3528489E-01   .1780728E-01   .3486542E-02  -.6390842E-02  -.1145352E-01
  -.1175573E-01  -.9006051E-02  -.3155166E-02   .5735616E-02   .1594418E-01
   .2655799E-01   .3567171E-01   .4198301E-01   .4510936E-01   .4425866E-01
   .3928905E-01   .3108920E-01   .2081110E-01   .9218654E-02  -.2425443E-02
  -.1325767E-01  -.2482627E-01  -.3837940E-01  -.5334894E-01  -.6933353E-01
  -.8623293E-01  -.1029852E+00  -.1188490E+00  -.1316767E+00  -.1407819E+00
  -.1508299E+00  -.1635997E+00  -.1776022E+00  -.1914597E+00  -.2038675E+00
  -.2146316E+00  -.2241283E+00  -.2330563E+00  -.2409678E+00  -.2477861E+00
  -.2541839E+00  -.2595593E+00  -.2636225E+00  -.2659669E+00  -.2663300E+00
  -.2654983E+00  -.2632242E+00  -.2587164E+00  -.2516066E+00  -.2417684E+00
  -.2298847E+00  -.2168303E+00  -.2023555E+00  -.1860521E+00  -.1682729E+00
  -.1495707E+00  -.1311222E+00  -.1144948E+00  -.1013217E+00  -.9253090E-01
  -.8771718E-01  -.8609121E-01  -.8612206E-01  -.8849262E-01  -.9413516E-01
  -.1012921E+00  -.1097786E+00  -.1185435E+00  -.1258757E+00  -.1313006E+00
  -.1337380E+00  -.1334444E+00  -.1296261E+00  -.1192074E+00  -.1024344E+00
  -.8026032E-01  -.5178967E-01  -.1877807E-01   .1553111E-01   .4748663E-01
   .7509682E-01   .9956844E-01   .1220585E+00   .1412929E+00   .1533816E+00
   .1580495E+00   .1593186E+00   .1600708E+00   .1622149E+00   .1650897E+00
   .1679179E+00   .1721120E+00   .1763571E+00   .1790073E+00   .1783428E+00
   .1731471E+00   .1620615E+00   .1422002E+00   .1146720E+00   .8210406E-01
   .4872655E-01   .2094225E-01   .2419383E-02  -.8821404E-02  -.1721562E-01
  -.2311570E-01  -.2497367E-01  -.2354411E-01  -.1983041E-01  -.1550807E-01
  -.1272621E-01  -.1131595E-01  -.1098498E-01  -.1273180E-01  -.1730251E-01
  -.2609702E-01  -.3998376E-01  -.5591201E-01  -.7264395E-01  -.9065079E-01
  -.1068219E+00  -.1191157E+00  -.1274939E+00  -.1329754E+00  -.1368397E+00
  -.1393088E+00  -.1411289E+00  -.1422107E+00  -.1405138E+00  -.1361829E+00
  -.1305957E+00  -.1215537E+00  -.1052497E+00  -.7861728E-01  -.4208304E-01
  -.8635304E-03   .3857693E-01   .7313024E-01   .1036004E+00   .1297425E+00
   .1498077E+00   .1600243E+00   .1551831E+00   .1327038E+00   .9460326E-01
   .4791371E-01   .3123294E-02  -.2699204E-01  -.3933903E-01  -.4419051E-01
  -.4874115E-01  -.5451741E-01  -.6121171E-01  -.6669935E-01  -.7286005E-01
  -.8177480E-01  -.9178894E-01  -.1015022E+00  -.1115705E+00  -.1221549E+00
  -.1325255E+00  -.1426440E+00  -.1520878E+00  -.1622300E+00  -.1734519E+00
  -.1832948E+00  -.1895991E+00  -.1940759E+00  -.1968351E+00  -.1964048E+00
  -.1951594E+00  -.1927544E+00  -.1878202E+00  -.1817302E+00  -.1748021E+00
  -.1656332E+00  -.1565819E+00  -.1501393E+00  -.1458041E+00  -.1444290E+00
  -.1443566E+00  -.1439004E+00  -.1443080E+00  -.1442265E+00  -.1429720E+00
  -.1399296E+00  -.1329194E+00  -.1233529E+00  -.1115921E+00  -.9685764E-01
  -.8189263E-01  -.6976358E-01  -.6028402E-01  -.5256631E-01  -.4773244E-01
  -.4534540E-01  -.4614093E-01  -.5083793E-01  -.5692583E-01  -.6311451E-01
  -.6790239E-01  -.7055176E-01  -.7071317E-01  -.6852821E-01  -.6636519E-01
  -.6384715E-01  -.6287501E-01  -.6502851E-01  -.6830195E-01  -.7377971E-01
  -.8106063E-01  -.8814352E-01  -.9409117E-01  -.9906847E-01  -.1032814E+00
  -.1053142E+00  -.1041518E+00  -.1011865E+00  -.9652697E-01  -.9044173E-01
  -.8326269E-01  -.7365788E-01  -.6228756E-01  -.4859753E-01  -.3404325E-01
  -.1958575E-01  -.3932333E-02   .1080872E-01   .2210845E-01   .3036195E-01
   .3660807E-01   .4080637E-01   .4396721E-01   .4567529E-01   .4482770E-01
   .4148633E-01   .3644365E-01   .2867569E-01   .1735480E-01   .5580915E-02
  -.4931479E-02  -.1400306E-01  -.2058536E-01  -.2593171E-01  -.3136212E-01
  -.3562724E-01  -.3914768E-01  -.4177617E-01  -.4380537E-01  -.4542091E-01
  -.4529571E-01  -.4516645E-01  -.4648605E-01  -.4875276E-01  -.5206034E-01
  -.5720872E-01  -.6306529E-01  -.6862946E-01  -.7445362E-01  -.7989946E-01
  -.8409724E-01  -.8620976E-01  -.8589738E-01  -.8337315E-01  -.7640594E-01
  -.6332899E-01  -.4463710E-01  -.2224861E-01  -.1092013E-02   .1612331E-01
   .3080315E-01   .4336400E-01   .5265757E-01   .5902781E-01   .6363042E-01
   .6754710E-01   .7176768E-01   .7595228E-01   .7987472E-01   .8372130E-01
   .8850069E-01   .9471738E-01   .1014182E+00   .1092025E+00   .1187429E+00
   .1283012E+00   .1365781E+00   .1450664E+00   .1536677E+00   .1619639E+00
   .1697680E+00   .1752671E+00   .1773256E+00   .1760034E+00   .1718359E+00
   .1638810E+00   .1512766E+00   .1353621E+00   .1185151E+00   .1012234E+00
   .8517113E-01   .7284535E-01   .6432815E-01   .6101933E-01   .6287898E-01
   .6787290E-01   .7559615E-01   .8604615E-01   .9904104E-01   .1133389E+00
   .1266846E+00   .1385896E+00   .1488967E+00   .1569333E+00   .1635355E+00
   .1642054E+00   .1505786E+00   .1177072E+00   .6754393E-01   .9002555E-02
  -.5135668E-01  -.1080337E+00  -.1557054E+00  -.1924958E+00  -.2187063E+00
  -.2354695E+00  -.2461302E+00  -.2534939E+00  -.2531441E+00  -.2431944E+00
  -.2277748E+00  -.2097310E+00  -.1921239E+00  -.1768883E+00  -.1626028E+00
  -.1473094E+00  -.1285282E+00  -.1059310E+00  -.8103865E-01  -.5383580E-01
  -.2613968E-01   .5523663E-03   .2491823E-01   .4653236E-01   .6665047E-01
   .8619674E-01   .1035847E+00   .1174707E+00   .1297388E+00   .1397376E+00
   .1486729E+00   .1564197E+00   .1605863E+00   .1607572E+00   .1585395E+00
   .1558503E+00   .1508163E+00   .1429762E+00   .1334320E+00   .1222129E+00
   .1089337E+00   .9457104E-01   .8255674E-01   .7428804E-01   .6929199E-01
   .6777176E-01   .6808541E-01   .7028898E-01   .7508810E-01   .8020793E-01
   .8484352E-01   .8982538E-01   .9446998E-01   .9800734E-01   .9987950E-01
   .9848427E-01   .9449457E-01   .8859017E-01   .8025246E-01   .7075445E-01
   .6264221E-01   .5679455E-01   .5262628E-01   .5085424E-01   .5155989E-01
   .5413193E-01   .5873227E-01   .6538166E-01   .7242159E-01   .7863258E-01
   .8417382E-01   .8903196E-01   .9379237E-01   .9722420E-01   .9880819E-01
   .9997157E-01   .1007296E+00   .1014296E+00   .1027289E+00   .1050987E+00
   .1077254E+00   .1096287E+00   .1114814E+00   .1130869E+00   .1128297E+00
   .1106883E+00   .1059667E+00   .9705909E-01   .8288859E-01   .6221416E-01
   .3841559E-01   .1434068E-01  -.7837956E-02  -.2419883E-01  -.3431971E-01
  -.3790304E-01  -.3283786E-01  -.1886844E-01   .1252484E-02   .2280435E-01
   .4164536E-01   .5738840E-01   .7070964E-01   .8230821E-01   .9211383E-01
   .9892424E-01   .1037610E+00   .1074837E+00   .1081262E+00   .1046664E+00
   .9711071E-01   .8430800E-01   .6707911E-01   .4859888E-01   .3066404E-01
   .1541296E-01   .2837771E-02  -.7391892E-02  -.1301238E-01  -.1467682E-01
  -.1221314E-01  -.5846581E-02   .4285076E-02   .1886185E-01   .3630956E-01
   .5498630E-01   .6953711E-01   .7477460E-01   .7225059E-01   .6339040E-01
   .4863274E-01   .2888048E-01   .3730464E-02  -.2488259E-01  -.5322281E-01
  -.7918524E-01  -.1037810E+00  -.1285035E+00  -.1532999E+00  -.1761987E+00
  -.1968173E+00  -.2164212E+00  -.2331437E+00  -.2462685E+00  -.2556677E+00
  -.2612685E+00  -.2640903E+00  -.2630715E+00  -.2580393E+00  -.2492166E+00
  -.2357112E+00  -.2154042E+00  -.1865261E+00  -.1515483E+00  -.1146305E+00
  -.8002513E-01  -.5108348E-01  -.3001957E-01  -.1641062E-01  -.8819578E-02
  -.6776592E-02  -.9153720E-02  -.1509165E-01  -.2322494E-01  -.3287578E-01
  -.4272245E-01  -.5141356E-01  -.5880360E-01  -.6392026E-01  -.6585922E-01
  -.6460318E-01  -.6066452E-01  -.5211879E-01  -.3636772E-01  -.1721357E-01
  -.7843942E-04   .1483072E-01   .2779695E-01   .3603321E-01   .3933834E-01
   .4193965E-01   .4622574E-01   .5270991E-01   .6014672E-01   .6709452E-01
   .7335740E-01   .7702722E-01   .7725002E-01   .7353984E-01   .6531268E-01
   .5270012E-01   .3743979E-01   .2313862E-01   .1398491E-01   .1321846E-01
   .2054207E-01   .3605294E-01   .5741500E-01   .7995065E-01   .1017795E+00
   .1214249E+00   .1381118E+00   .1519743E+00   .1626255E+00   .1679088E+00
   .1656154E+00   .1550239E+00   .1352082E+00   .1097958E+00   .8512788E-01
   .6343621E-01   .4730446E-01   .3935976E-01   .3575379E-01   .3253463E-01
   .2839073E-01   .2064984E-01   .9101965E-02  -.5712951E-02  -.2337522E-01
  -.4242223E-01  -.6151528E-01  -.8090415E-01  -.9998836E-01  -.1165953E+00
  -.1315717E+00  -.1452448E+00  -.1578040E+00  -.1698666E+00  -.1802223E+00
  -.1859444E+00  -.1851951E+00  -.1800941E+00  -.1724228E+00  -.1628647E+00
  -.1526502E+00  -.1417418E+00  -.1296004E+00  -.1173899E+00  -.1057010E+00
  -.9408896E-01  -.8106990E-01  -.6590437E-01  -.5150833E-01  -.4163385E-01
  -.3831486E-01  -.4068605E-01  -.4656320E-01  -.5532037E-01  -.6687404E-01
  -.7863132E-01  -.8785738E-01  -.9464778E-01  -.9791468E-01  -.9765398E-01
  -.9443346E-01  -.8694499E-01  -.7422532E-01  -.5665033E-01  -.3621858E-01
  -.1428614E-01   .7630680E-02   .2728437E-01   .4202969E-01   .5200029E-01
   .5863562E-01   .6261113E-01   .6471832E-01   .6437566E-01   .6164292E-01
   .5779317E-01   .5500608E-01   .5476356E-01   .5609200E-01   .5867991E-01
   .6250444E-01   .6598118E-01   .6858720E-01   .6997613E-01   .6899080E-01
   .6626811E-01   .6224147E-01   .5593538E-01   .4782771E-01   .3997640E-01
   .3307178E-01   .2689439E-01   .2347908E-01   .2411615E-01   .2860522E-01
   .3738668E-01   .4933989E-01   .6266474E-01   .7737542E-01   .9339975E-01
   .1075603E+00   .1150444E+00   .1141412E+00   .1051983E+00   .8990000E-01
   .7332619E-01   .6093023E-01   .5537048E-01   .5579231E-01   .6049612E-01
   .6835158E-01   .7739818E-01   .8528494E-01   .8984990E-01   .9068509E-01
   .8700784E-01   .7689188E-01   .6055960E-01   .3947612E-01   .1629602E-01
  -.5325143E-02  -.2422437E-01  -.4197183E-01  -.5961741E-01  -.7588948E-01
  -.9017449E-01  -.1032980E+00  -.1143203E+00  -.1230337E+00  -.1291217E+00
  -.1301586E+00  -.1240921E+00  -.1088521E+00  -.8376290E-01  -.5035454E-01
  -.1069740E-01   .3105676E-01   .6758541E-01   .9224757E-01   .1045061E+00
   .1082220E+00   .1065198E+00   .9904458E-01   .8383541E-01   .6160636E-01
   .3813335E-01   .1894341E-01   .1670261E-02  -.1584967E-01  -.3094374E-01
  -.4176037E-01  -.4940713E-01  -.5624347E-01  -.6161608E-01  -.6497226E-01
  -.6752447E-01  -.6850687E-01  -.6702471E-01  -.6238073E-01  -.5313002E-01
  -.3655813E-01  -.1145479E-01   .1863222E-01   .4710306E-01   .6678323E-01
   .7400810E-01   .6958026E-01   .5615157E-01   .3633510E-01   .1358385E-01
  -.8580395E-02  -.2807176E-01  -.4355308E-01  -.5492008E-01  -.6251249E-01
  -.6685967E-01  -.6791554E-01  -.6438895E-01  -.5683130E-01  -.4806465E-01
  -.4029540E-01  -.3505616E-01  -.3359703E-01  -.3654376E-01  -.4445435E-01
  -.5738598E-01  -.7402563E-01  -.8909678E-01  -.9855731E-01  -.1038244E+00
  -.1059917E+00  -.1059366E+00  -.1038458E+00  -.9877265E-01  -.9166628E-01
  -.8278736E-01  -.7224432E-01  -.5963828E-01  -.4360213E-01  -.2456841E-01
  -.2575112E-02   .2009926E-01   .4065377E-01   .5933278E-01   .7542650E-01
   .8870559E-01   .1003489E+00   .1096037E+00   .1155199E+00   .1199560E+00
   .1240509E+00   .1262583E+00   .1244728E+00   .1154947E+00   .9680917E-01
   .7034375E-01   .4031389E-01   .9876135E-02  -.1682970E-01  -.3517587E-01
  -.4507745E-01  -.5062975E-01  -.5552793E-01  -.6124216E-01  -.6729032E-01
  -.7372118E-01  -.8013196E-01  -.8510802E-01  -.8787154E-01  -.8706169E-01
  -.8251588E-01  -.7273838E-01  -.5594552E-01  -.3472150E-01  -.1254774E-01
   .8851791E-02   .2821212E-01   .4595954E-01   .6238018E-01   .7467270E-01
   .8040063E-01   .7967800E-01   .7441297E-01   .6551124E-01   .5223633E-01
   .3506832E-01   .1783690E-01   .4137351E-02  -.4367508E-02  -.7829098E-02
  -.8160218E-02  -.4660796E-02   .3210509E-02   .1464298E-01   .2758928E-01
   .3888672E-01   .4818909E-01   .5553386E-01   .6078574E-01   .6517421E-01
   .6826846E-01   .6909903E-01   .6862999E-01   .6622396E-01   .6095371E-01
   .5337211E-01   .4460471E-01   .3588373E-01   .2734687E-01   .1991395E-01
   .1343109E-01   .7441717E-02   .2369203E-02  -.2460957E-02  -.5846863E-02
  -.7416061E-02  -.8130393E-02  -.6760711E-02  -.3959717E-02  -.7692691E-03
   .2700345E-02   .5076232E-02   .6760576E-02   .7819270E-02   .7384224E-02
   .5498454E-02   .1528927E-02  -.5052171E-02  -.1382660E-01  -.2476938E-01
  -.3677773E-01  -.4727111E-01  -.5433153E-01  -.5688759E-01  -.5618084E-01
  -.5200495E-01  -.4329581E-01  -.3128949E-01  -.1610365E-01   .2987966E-02
   .2455420E-01   .4472756E-01   .5958434E-01   .6869688E-01   .7503594E-01
   .7973230E-01   .8252360E-01   .8363035E-01   .8330702E-01   .8249514E-01
   .8198678E-01   .8155586E-01   .8099585E-01   .7983654E-01   .7624252E-01
   .6958178E-01   .5966187E-01   .4599804E-01   .2899016E-01   .9796827E-02
  -.8047244E-02  -.2228337E-01  -.3280765E-01  -.3995563E-01  -.4506253E-01
  -.4723898E-01  -.4585913E-01  -.4341705E-01  -.4118227E-01  -.3876818E-01
  -.3654183E-01  -.3438876E-01  -.3138686E-01  -.2720710E-01  -.2172854E-01
  -.1510236E-01  -.8185895E-02  -.2349325E-02   .1537291E-02   .3320826E-02
   .2818073E-02   .3870999E-03  -.3979999E-02  -.9734238E-02  -.1618827E-01
  -.2368061E-01  -.3111713E-01  -.3631697E-01  -.3901967E-01  -.3893421E-01
  -.3472800E-01  -.2654816E-01  -.1575459E-01  -.4358953E-02   .6755557E-02
   .1639382E-01   .2320241E-01   .2725948E-01   .2865175E-01   .2788672E-01
   .2611389E-01   .2419416E-01   .2235667E-01   .2097932E-01   .2129363E-01
   .2417449E-01   .2975014E-01   .3763348E-01   .4638022E-01   .5462049E-01
   .6151149E-01   .6609861E-01   .6717851E-01   .6502930E-01   .6021183E-01
   .5248145E-01   .4197354E-01   .2989061E-01   .1789021E-01   .7422750E-02
   .2924191E-03  -.4203493E-02  -.7433651E-02  -.9268146E-02  -.9436905E-02
  -.7855803E-02  -.5311595E-02  -.2385511E-02  -.4947538E-03  -.5237925E-03
  -.2049999E-02  -.5086555E-02  -.9864848E-02  -.1619116E-01  -.2290714E-01
  -.2933767E-01  -.3459091E-01  -.3801281E-01  -.4001415E-01  -.3985775E-01
  -.3741579E-01  -.3331791E-01  -.2664294E-01  -.1784450E-01  -.8057092E-02
   .3165511E-02   .1600802E-01   .2952114E-01   .4229614E-01   .5404446E-01
   .6473155E-01   .7351244E-01   .7883333E-01   .8038612E-01   .7932218E-01
   .7501216E-01   .6611883E-01   .5227707E-01   .3494413E-01   .1663831E-01
  -.1720408E-03  -.1434930E-01  -.2537915E-01  -.3258854E-01  -.3719465E-01
  -.3931134E-01  -.3877808E-01  -.3672122E-01  -.3427394E-01  -.3242214E-01
  -.3150392E-01  -.3190344E-01  -.3341982E-01  -.3521744E-01  -.3763772E-01
  -.4117683E-01  -.4534431E-01  -.4990293E-01  -.5482418E-01  -.5952546E-01
  -.6299498E-01  -.6591224E-01  -.6906179E-01  -.7165078E-01  -.7333151E-01
  -.7466218E-01  -.7620355E-01  -.7796048E-01  -.7940804E-01  -.8020415E-01
  -.8103342E-01  -.8176908E-01  -.8108955E-01  -.7869602E-01  -.7470639E-01
  -.6895497E-01  -.6170809E-01  -.5333213E-01  -.4411623E-01  -.3421903E-01
  -.2391834E-01  -.1346378E-01  -.2955697E-02   .6849423E-02   .1569616E-01
   .2377453E-01   .3035669E-01   .3497419E-01   .3838365E-01   .4138639E-01
   .4452464E-01   .4873482E-01   .5394903E-01   .5966024E-01   .6557254E-01
   .7089297E-01   .7494782E-01   .7691374E-01   .7621010E-01   .7307876E-01
   .6707893E-01   .5866750E-01   .4908364E-01   .3813289E-01   .2618663E-01
   .1533323E-01   .7544987E-02   .2988862E-02   .7934948E-03  -.1490911E-03
  -.8211644E-03  -.2117231E-02  -.5102325E-02  -.1019151E-01  -.1662807E-01
  -.2433395E-01  -.3316934E-01  -.4194093E-01  -.4941268E-01  -.5403368E-01
  -.5476267E-01  -.5189108E-01  -.4559684E-01  -.3699134E-01  -.2835499E-01
  -.2049978E-01  -.1411221E-01  -.8952334E-02  -.4457981E-02  -.9281223E-03
   .2163283E-02   .5217237E-02   .8190812E-02   .1107212E-01   .1366839E-01
   .1582723E-01   .1719471E-01   .1702964E-01   .1516839E-01   .1167709E-01
   .7589274E-02   .3783662E-02   .5013746E-03  -.1222761E-02  -.1840492E-02
  -.1598213E-02  -.4895519E-03   .9201744E-03   .2495706E-02   .4139579E-02
   .6443565E-02   .9062066E-02   .1140317E-01   .1363066E-01   .1573344E-01
   .1714185E-01   .1773429E-01   .1705189E-01   .1436479E-01   .9923703E-02
   .3217440E-02  -.5448294E-02  -.1461610E-01  -.2289345E-01  -.2946295E-01
  -.3469418E-01  -.3874179E-01  -.4162740E-01  -.4263602E-01  -.4174683E-01
  -.4050635E-01  -.3908420E-01  -.3720726E-01  -.3522984E-01  -.3406361E-01
  -.3409848E-01  -.3540562E-01  -.3801089E-01  -.4098945E-01  -.4339095E-01
  -.4466027E-01  -.4411369E-01  -.4125009E-01  -.3693647E-01  -.3138565E-01
  -.2459808E-01  -.1787980E-01  -.1232666E-01  -.8384698E-02  -.5478752E-02
  -.2709613E-02  -.2146144E-04   .2050488E-02   .3124069E-02   .2512177E-02
  -.6775814E-04  -.3802650E-02  -.7468228E-02  -.1007277E-01  -.1214257E-01
  -.1367091E-01  -.1437307E-01  -.1438467E-01  -.1334987E-01  -.1166545E-01
  -.9372302E-02  -.5755742E-02  -.8567214E-03   .4278822E-02   .8678453E-02
   .1169425E-01   .1271618E-01   .1134447E-01   .8049704E-02   .3893101E-02
  -.1621929E-03  -.3532579E-02  -.5932099E-02  -.7943889E-02  -.1063732E-01
  -.1348563E-01  -.1642933E-01  -.2023495E-01  -.2465986E-01  -.2964682E-01
  -.3514170E-01  -.4012246E-01  -.4401465E-01  -.4696281E-01  -.4794148E-01
  -.4676779E-01  -.4346503E-01  -.3728623E-01  -.2877328E-01  -.1822618E-01
  -.6824373E-02   .3399198E-02   .1138959E-01   .1668211E-01   .1954678E-01
   .2082929E-01   .2113334E-01   .2075778E-01   .2047019E-01   .2038915E-01
   .1981274E-01   .1822540E-01   .1583839E-01   .1340940E-01   .1106901E-01
   .9307970E-02   .8567260E-02   .8111422E-02   .7799784E-02   .8450330E-02
   .1018517E-01   .1241016E-01   .1504118E-01   .1763203E-01   .1886287E-01
   .1808561E-01   .1525935E-01   .9913323E-02   .1661950E-02  -.9181412E-02
  -.2092302E-01  -.3165818E-01  -.4057952E-01  -.4737656E-01  -.5194552E-01
  -.5385285E-01  -.5347303E-01  -.5148691E-01  -.4832236E-01  -.4481088E-01
  -.4136419E-01  -.3800355E-01  -.3443708E-01  -.3044840E-01  -.2623703E-01
  -.2159114E-01  -.1646579E-01  -.1186027E-01  -.8441299E-02  -.5981810E-02
  -.3880997E-02  -.1562616E-02   .5603312E-03   .2620332E-02   .5937819E-02
   .9883229E-02   .1423291E-01   .1979909E-01   .2563452E-01   .3111382E-01
   .3634600E-01   .4046353E-01   .4247755E-01   .4281685E-01   .4215972E-01
   .4050902E-01   .3816897E-01   .3592526E-01   .3399537E-01   .3181850E-01
   .2922346E-01   .2649321E-01   .2289434E-01   .1833261E-01   .1311579E-01
   .7197822E-02   .1951950E-02  -.2442873E-02  -.6463689E-02  -.1015389E-01
  -.1374703E-01  -.1665013E-01  -.1867828E-01  -.2010624E-01  -.2159120E-01
  -.2343735E-01  -.2515346E-01  -.2618584E-01  -.2643146E-01  -.2579257E-01
  -.2474117E-01  -.2389722E-01  -.2299622E-01  -.2219716E-01  -.2064331E-01
  -.1844424E-01  -.1709949E-01  -.1709203E-01  -.1844869E-01  -.2018639E-01
  -.2114319E-01  -.2172360E-01  -.2257986E-01  -.2344692E-01  -.2441292E-01
  -.2537854E-01  -.2604745E-01  -.2655319E-01  -.2620890E-01  -.2542044E-01
  -.2465784E-01  -.2317371E-01  -.2222345E-01  -.2150784E-01  -.1939348E-01
  -.1593693E-01  -.1089659E-01  -.4738916E-02   .2256746E-02   .9892405E-02
   .1682860E-01   .2239931E-01   .2599781E-01   .2764936E-01   .2759463E-01
   .2633083E-01   .2477423E-01   .2244863E-01   .2040176E-01   .1952389E-01
   .1933783E-01   .1998069E-01   .2080120E-01   .2180197E-01   .2312985E-01
   .2437014E-01   .2521742E-01   .2571320E-01   .2621396E-01   .2647103E-01
   .2737362E-01   .2905920E-01   .3083895E-01   .3292610E-01   .3525474E-01
   .3773908E-01   .4013937E-01   .4212475E-01   .4378795E-01   .4479647E-01
   .4454537E-01   .4354515E-01   .4171045E-01   .3873842E-01   .3519766E-01
   .3191258E-01   .2872849E-01   .2538997E-01   .2300258E-01   .2144041E-01
   .1997730E-01   .2015011E-01   .2250788E-01   .2499006E-01   .2749870E-01
   .2985726E-01   .3089254E-01   .3067460E-01   .2947432E-01   .2715248E-01
   .2372404E-01   .2001046E-01   .1639081E-01   .1339255E-01   .1111447E-01
   .9543921E-02   .9224479E-02   .1076151E-01   .1421775E-01   .1795617E-01
   .2129767E-01   .2405693E-01   .2542033E-01   .2586322E-01   .2537957E-01
   .2412874E-01   .2276206E-01   .2108292E-01   .1949239E-01   .1756754E-01
   .1426060E-01   .1032423E-01   .6437266E-02   .1159580E-02  -.5131004E-02
  -.1059987E-01  -.1581922E-01  -.2085710E-01  -.2511105E-01  -.2862642E-01
  -.3073953E-01  -.3113595E-01  -.2954323E-01  -.2607406E-01  -.2218117E-01
  -.1841734E-01  -.1412018E-01  -.8838214E-02  -.3111473E-02   .1898840E-02
   .6546751E-02   .1120931E-01   .1436281E-01   .1572136E-01   .1578617E-01
   .1401498E-01   .1026816E-01   .4640502E-02  -.2840420E-02  -.1100859E-01
  -.1855461E-01  -.2578794E-01  -.3258943E-01  -.3815848E-01  -.4252910E-01
  -.4543392E-01  -.4690107E-01  -.4710549E-01  -.4589893E-01  -.4418746E-01
  -.4180545E-01  -.3823279E-01  -.3413659E-01  -.2912003E-01  -.2254183E-01
  -.1454302E-01  -.5206386E-02   .5780241E-02   .1718917E-01   .2757109E-01
   .3594719E-01   .4130728E-01   .4497713E-01   .4729130E-01   .4778786E-01
   .4730078E-01   .4583256E-01   .4420121E-01   .4256989E-01   .4097933E-01
   .4120349E-01   .4174436E-01   .4137844E-01   .4201739E-01   .4312157E-01
   .4367403E-01   .4566073E-01   .4819964E-01   .4980826E-01   .5248706E-01
   .5512048E-01   .5662839E-01   .5879248E-01   .6158955E-01   .6328620E-01
   .6308636E-01   .6236428E-01   .6258165E-01   .6250658E-01   .6137295E-01
   .5944268E-01   .5679844E-01   .5347424E-01   .4935262E-01   .4478647E-01
   .3969351E-01   .3466401E-01   .2906201E-01   .2360587E-01   .1966919E-01
   .1657909E-01   .1384658E-01   .1100872E-01   .8627198E-02   .6923557E-02
   .5828243E-02   .5277062E-02   .5153675E-02   .5179018E-02   .5257682E-02
   .5984621E-02   .6523013E-02   .6719582E-02   .7076572E-02   .7850231E-02
   .1041749E-01   .1370853E-01   .1705455E-01   .2233410E-01   .2822831E-01
   .3334658E-01   .3912114E-01   .4438096E-01   .4916415E-01   .5485531E-01
   .5908416E-01   .6119369E-01   .6289918E-01   .6354867E-01   .6338994E-01
   .6304046E-01   .6138932E-01   .5932981E-01   .5657782E-01   .5320558E-01
   .4954172E-01   .4494495E-01   .4041539E-01   .3499534E-01   .2935503E-01
   .2500327E-01   .2106905E-01   .1836387E-01   .1707355E-01   .1587624E-01
   .1539826E-01   .1607735E-01   .1763523E-01   .2046974E-01   .2303575E-01
   .2493448E-01   .2693857E-01   .2865095E-01   .2982939E-01   .2969707E-01
   .2847896E-01   .2708949E-01   .2528621E-01   .2315455E-01   .2118078E-01
   .1900011E-01   .1660736E-01   .1337938E-01   .9688367E-02   .6413332E-02
   .3611297E-02   .1628422E-02   .4390295E-03   .2482237E-03   .1050286E-02
   .3577420E-02   .6125860E-02   .7631155E-02   .8577194E-02   .7426669E-02
   .5502691E-02   .3683914E-02   .1015370E-02  -.2018490E-02  -.5248513E-02
  -.7873716E-02  -.9752393E-02  -.1175163E-01  -.1278026E-01  -.1277609E-01
  -.1201939E-01  -.9772853E-02  -.7090581E-02  -.5232802E-02  -.3438763E-02
  -.1472508E-02  -.1047605E-02  -.1578321E-02  -.2700798E-02  -.4582180E-02
  -.6982801E-02  -.9433293E-02  -.9541128E-02  -.7439500E-02  -.3586879E-02
   .2874963E-02   .1144305E-01   .1981866E-01   .2638315E-01   .3156445E-01
   .3459925E-01   .3614212E-01   .3711161E-01   .3581180E-01   .3329494E-01
   .3082550E-01   .2809698E-01   .2428341E-01   .2031287E-01   .1823377E-01
   .1570789E-01   .1266454E-01   .1153558E-01   .1124088E-01   .1001809E-01
   .9057593E-02   .8116180E-02   .6272288E-02   .5578365E-02   .4419174E-02
   .2840195E-02   .2520012E-02   .2053685E-02   .1741199E-02   .9440834E-03
  -.3881177E-03  -.1965332E-02  -.4483209E-02  -.6797277E-02  -.9223515E-02
  -.1205322E-01  -.1479954E-01  -.1755790E-01  -.1917333E-01  -.2046648E-01
  -.2189954E-01  -.2234450E-01  -.2192099E-01  -.2061557E-01  -.1883261E-01
  -.1776542E-01  -.1743319E-01  -.1788264E-01  -.1958780E-01  -.2068465E-01
  -.2208692E-01  -.2431862E-01  -.2454781E-01  -.2338748E-01  -.2236168E-01
  -.2049806E-01  -.1723137E-01  -.1347879E-01  -.9613300E-02  -.6282233E-02
  -.3575010E-02  -.1162977E-02   .5414792E-03   .1660510E-02   .2566462E-02
   .2553658E-02   .1150911E-02  -.5190451E-03  -.2450671E-02  -.4803575E-02
  -.7062538E-02  -.9217855E-02  -.1120873E-01  -.1341646E-01  -.1590642E-01
  -.1825443E-01  -.1980256E-01  -.2093681E-01  -.2197156E-01  -.2331107E-01
  -.2531972E-01  -.2689128E-01  -.2851505E-01  -.2969169E-01  -.3032824E-01
  -.3171782E-01  -.3280680E-01  -.3358503E-01  -.3456073E-01  -.3501539E-01
  -.3568285E-01  -.3594142E-01  -.3537005E-01  -.3486115E-01  -.3362462E-01
  -.3196119E-01  -.2975602E-01  -.2692955E-01  -.2375512E-01  -.2051298E-01
  -.1788381E-01  -.1622026E-01  -.1573883E-01  -.1544017E-01  -.1583569E-01
  -.1649358E-01  -.1599275E-01  -.1516490E-01  -.1339512E-01  -.1046914E-01
  -.7198445E-02  -.3297224E-02   .1019841E-02   .5649029E-02   .9389206E-02
   .1151112E-01   .1387957E-01   .1641324E-01   .1797260E-01   .1878720E-01
   .1885062E-01   .1798669E-01   .1642527E-01   .1469285E-01   .1189932E-01
   .8427253E-02   .5207146E-02   .1720704E-02  -.1284946E-02  -.3587833E-02
  -.6152309E-02  -.9422578E-02  -.1250537E-01  -.1514159E-01  -.1735000E-01
  -.1839787E-01  -.1859044E-01  -.1868006E-01  -.1844888E-01  -.1738098E-01
  -.1581768E-01  -.1420714E-01  -.1261326E-01  -.1079127E-01  -.9020783E-02
  -.6763069E-02  -.3592609E-02  -.1077869E-02   .1996575E-02   .6386404E-02
   .9995587E-02   .1330486E-01   .1669667E-01   .2022382E-01   .2404806E-01
   .2693748E-01   .2884769E-01   .2905752E-01   .2728377E-01   .2487065E-01
   .2140845E-01   .1631098E-01   .9939435E-02   .2346863E-02  -.6350081E-02
  -.1547716E-01  -.2371589E-01  -.3052436E-01  -.3660752E-01  -.4119787E-01
  -.4369923E-01  -.4446719E-01  -.4392243E-01  -.4216545E-01  -.3897166E-01
  -.3550297E-01  -.3199695E-01  -.2826010E-01  -.2505243E-01  -.2263491E-01
  -.2057469E-01  -.1834988E-01  -.1615561E-01  -.1382704E-01  -.1145809E-01
  -.1026952E-01  -.9814393E-02  -.9497008E-02  -.9996591E-02  -.1094435E-01
  -.1161898E-01  -.1244678E-01  -.1360716E-01  -.1472009E-01  -.1560385E-01
  -.1658101E-01  -.1799954E-01  -.1938624E-01  -.2071134E-01  -.2206330E-01
  -.2340483E-01  -.2457421E-01  -.2597465E-01  -.2701030E-01  -.2656776E-01
  -.2633803E-01  -.2577144E-01  -.2413236E-01  -.2362605E-01  -.2335933E-01
  -.2308090E-01  -.2397624E-01  -.2524892E-01  -.2698591E-01  -.2883794E-01
  -.2996748E-01  -.3049738E-01  -.3086526E-01  -.3052751E-01  -.2938876E-01
  -.2815630E-01  -.2607327E-01  -.2346660E-01  -.2072602E-01  -.1757337E-01
  -.1414170E-01  -.1022538E-01  -.6069864E-02  -.1494430E-02   .3127768E-02
   .6998104E-02   .1102212E-01   .1493744E-01   .1772626E-01   .2000722E-01
   .2176527E-01   .2291393E-01   .2339027E-01   .2274730E-01   .2143484E-01
   .1988325E-01   .1803482E-01   .1636690E-01   .1490829E-01   .1352939E-01
   .1312492E-01   .1339248E-01   .1432046E-01   .1620223E-01   .1788383E-01
   .1925252E-01   .2081275E-01   .2168174E-01   .2146719E-01   .2057498E-01
   .1925006E-01   .1804920E-01   .1638287E-01   .1444717E-01   .1315463E-01
   .1233549E-01   .1218485E-01   .1192844E-01   .1083480E-01   .9492878E-02
   .7307799E-02   .3751859E-02  -.4154319E-03  -.4740088E-02  -.9160267E-02
  -.1352621E-01  -.1705171E-01  -.1987672E-01  -.2329755E-01  -.2665239E-01
  -.2897865E-01  -.2989565E-01  -.2933600E-01  -.2782263E-01  -.2502872E-01
  -.2221026E-01  -.1971030E-01  -.1611910E-01  -.1318537E-01  -.1179633E-01
  -.9718505E-02  -.7757185E-02  -.6605865E-02  -.4584470E-02  -.2260517E-02
  -.7281019E-04   .2470156E-02   .4884336E-02   .7047736E-02   .9427868E-02
   .1108107E-01   .1212368E-01   .1384355E-01   .1532528E-01   .1664442E-01
   .1801835E-01   .1852309E-01   .1865445E-01   .1798946E-01   .1631821E-01
   .1431407E-01   .1200537E-01   .9887980E-02   .8087466E-02   .6638065E-02
   .5347798E-02   .4579487E-02   .4974013E-02   .5232888E-02   .5156582E-02
   .5255405E-02   .4986296E-02   .3917488E-02   .2317742E-02   .7174741E-03
  -.9812804E-03  -.2851926E-02  -.4480135E-02  -.5492069E-02  -.6273868E-02
  -.6959083E-02  -.6823404E-02  -.6152628E-02  -.4762856E-02  -.1661458E-02
   .1893336E-02   .5282632E-02   .9099108E-02   .1245326E-01   .1467215E-01
   .1589007E-01   .1593344E-01   .1590247E-01   .1599361E-01   .1552723E-01
   .1557378E-01   .1632494E-01   .1747857E-01   .1864540E-01   .1998507E-01
   .2165079E-01   .2269031E-01   .2356631E-01   .2386001E-01   .2330045E-01
   .2241670E-01   .1973457E-01   .1619235E-01   .1266708E-01   .7896665E-02
   .2976507E-02  -.1781046E-02  -.6707370E-02  -.1023186E-01  -.1236677E-01
  -.1329098E-01  -.1285897E-01  -.1214127E-01  -.1138381E-01  -.1023230E-01
  -.9231191E-02  -.8745957E-02  -.8107229E-02  -.8016425E-02  -.8452306E-02
  -.8752298E-02  -.9814929E-02  -.1147491E-01  -.1251423E-01  -.1367557E-01
  -.1483078E-01  -.1469739E-01  -.1447249E-01  -.1386932E-01  -.1275196E-01
  -.1172103E-01  -.9653073E-02  -.6660628E-02  -.3388391E-02   .5576567E-03
   .5453781E-02   .1078221E-01   .1585789E-01   .2044250E-01   .2426968E-01
   .2728096E-01   .3040589E-01   .3314841E-01   .3495660E-01   .3644467E-01
   .3675434E-01   .3603489E-01   .3504924E-01   .3403248E-01   .3257769E-01
   .3013460E-01   .2759865E-01   .2490028E-01   .2186972E-01   .1813107E-01
   .1444362E-01   .1047242E-01   .4797767E-02  -.1283976E-02  -.7363060E-02
  -.1385224E-01  -.2024809E-01  -.2530659E-01  -.2825881E-01  -.2999694E-01
  -.3057050E-01  -.2853912E-01  -.2461692E-01  -.1964104E-01  -.1332353E-01
  -.6368315E-02   .1986850E-03   .6907050E-02   .1357967E-01   .1882335E-01
   .2301667E-01   .2600953E-01   .2666883E-01   .2633575E-01   .2572235E-01
   .2405560E-01   .2215091E-01   .2011025E-01   .1815837E-01   .1692074E-01
   .1628359E-01   .1587207E-01   .1529752E-01   .1478726E-01   .1475421E-01
   .1505033E-01   .1513511E-01   .1479881E-01   .1439218E-01   .1349608E-01
   .1184762E-01   .9645129E-02   .7116202E-02   .4667998E-02   .1839734E-02
  -.1002546E-02  -.3334611E-02  -.5707943E-02  -.8410609E-02  -.1031812E-01
  -.1113473E-01  -.1169450E-01  -.1179687E-01  -.1133135E-01  -.1084985E-01
  -.1044315E-01  -.9773163E-02  -.9575802E-02  -.9724124E-02  -.1040107E-01
  -.1252705E-01  -.1531906E-01  -.1871180E-01  -.2304325E-01  -.2778195E-01
  -.3298427E-01  -.3808346E-01  -.4265605E-01  -.4738501E-01  -.5106670E-01
  -.5336909E-01  -.5458996E-01  -.5436308E-01  -.5254331E-01  -.4885888E-01
  -.4380586E-01  -.3782751E-01  -.3174889E-01  -.2497702E-01  -.1821200E-01
  -.1214665E-01  -.6404531E-02  -.1443612E-02   .3542150E-02   .8283242E-02
   .1201466E-01   .1420252E-01   .1547172E-01   .1680790E-01   .1772379E-01
   .1782884E-01   .1743976E-01   .1670497E-01   .1550574E-01   .1377317E-01
   .1138519E-01   .8251058E-02   .4164829E-02  -.6116217E-03  -.5182375E-02
  -.9295071E-02  -.1330080E-01  -.1637120E-01  -.1827155E-01  -.1986742E-01
  -.2031056E-01  -.1966679E-01  -.1850611E-01  -.1593486E-01  -.1283909E-01
  -.9952633E-02  -.6648987E-02  -.3410101E-02  -.2919522E-03   .2555633E-02
   .4386220E-02   .6069123E-02   .7594838E-02   .7953168E-02   .7507883E-02
   .6521680E-02   .4452641E-02   .1170568E-02  -.2404230E-02  -.6113484E-02
  -.1025347E-01  -.1438297E-01  -.1791862E-01  -.2099219E-01  -.2412492E-01
  -.2690932E-01  -.2946147E-01  -.3134016E-01  -.3249619E-01  -.3437810E-01
  -.3636723E-01  -.3796423E-01  -.3950103E-01  -.4031198E-01  -.4059660E-01
  -.4030251E-01  -.3894558E-01  -.3751518E-01  -.3564542E-01  -.3261827E-01
  -.2978528E-01  -.2809050E-01  -.2651482E-01  -.2485517E-01  -.2406961E-01
  -.2320872E-01  -.2293949E-01  -.2286442E-01  -.2260843E-01  -.2308344E-01
  -.2284688E-01  -.2272914E-01  -.2337103E-01  -.2385737E-01  -.2432320E-01
  -.2479820E-01  -.2534233E-01  -.2625237E-01  -.2653834E-01  -.2603390E-01
  -.2544929E-01  -.2413878E-01  -.2217395E-01  -.2017863E-01  -.1775556E-01
  -.1477754E-01  -.1228886E-01  -.9028393E-02  -.4221429E-02   .6004086E-03
   .5407957E-02   .1038372E-01   .1543587E-01   .2004141E-01   .2422515E-01
   .2797656E-01   .3120247E-01   .3478372E-01   .3838282E-01   .4058797E-01
   .4130249E-01   .4170567E-01   .4131465E-01   .3991557E-01   .3781520E-01
   .3387584E-01   .2887982E-01   .2391162E-01   .1824294E-01   .1256020E-01
   .7391626E-02   .2327568E-02  -.2537484E-02  -.6878116E-02  -.9870429E-02
  -.1144774E-01  -.1296888E-01  -.1415057E-01  -.1388377E-01  -.1405013E-01
  -.1487915E-01  -.1532202E-01  -.1620316E-01  -.1757253E-01  -.1908152E-01
  -.2047952E-01  -.2153645E-01  -.2252103E-01  -.2327255E-01  -.2348048E-01
  -.2308731E-01  -.2191668E-01  -.2026241E-01  -.1785528E-01  -.1523751E-01
  -.1272371E-01  -.9185102E-02  -.5273570E-02  -.9766796E-03   .3756862E-02
   .7775854E-02   .1107682E-01   .1435783E-01   .1714572E-01   .1882401E-01
   .2026359E-01   .2114879E-01   .2112367E-01   .2127328E-01   .2105347E-01
   .1994549E-01   .1856639E-01   .1687080E-01   .1480121E-01   .1215887E-01
   .9622920E-02   .7081840E-02   .4509434E-02   .1685081E-02  -.1603200E-02
  -.3934189E-02  -.6058327E-02  -.8630463E-02  -.1086802E-01  -.1262355E-01
  -.1471448E-01  -.1687183E-01  -.1780266E-01  -.1825497E-01  -.1884474E-01
  -.1883097E-01  -.1765765E-01  -.1578087E-01  -.1385089E-01  -.1166627E-01
  -.9013659E-02  -.6048084E-02  -.3397105E-02  -.1693681E-02  -.7274730E-03
   .2011881E-03  -.4469034E-03  -.2615057E-02  -.4850733E-02  -.8633997E-02
  -.1192904E-01  -.1406936E-01  -.1666796E-01  -.1814617E-01  -.1893847E-01
  -.1933651E-01  -.1935270E-01  -.1987981E-01  -.2018472E-01  -.1988227E-01
  -.2038939E-01  -.2215275E-01  -.2441057E-01  -.2666649E-01  -.2896964E-01
  -.3179241E-01  -.3439696E-01  -.3566745E-01  -.3566774E-01  -.3488842E-01
  -.3329109E-01  -.3093531E-01  -.2749147E-01  -.2295719E-01  -.1849429E-01
  -.1513116E-01  -.1208508E-01  -.9045309E-02  -.7071035E-02  -.5748108E-02
  -.5018464E-02  -.4816162E-02  -.4796452E-02  -.5804268E-02  -.7545460E-02
  -.9587260E-02  -.1178082E-01  -.1358360E-01  -.1488898E-01  -.1529805E-01
  -.1526137E-01  -.1523354E-01  -.1381928E-01  -.1131449E-01  -.8762017E-02
  -.5419166E-02  -.2199252E-02   .1190027E-02   .5357580E-02   .8547025E-02
   .1034331E-01   .1115996E-01   .1113887E-01   .1139295E-01   .1123797E-01
   .9946954E-02   .9587754E-02   .9600968E-02   .8989617E-02   .8053400E-02
   .7092912E-02   .6117486E-02   .4221470E-02   .2932324E-02   .2634492E-02
   .1319908E-02   .5238504E-03   .8317124E-03   .1177391E-02   .1940995E-02
   .2700644E-02   .3822953E-02   .5444791E-02   .6401276E-02   .6532248E-02
   .7269166E-02   .7557294E-02   .6311668E-02   .5312198E-02   .3393296E-02
   .3639870E-03  -.2777954E-02  -.6763748E-02  -.1110975E-01  -.1523570E-01
  -.1850240E-01  -.2126599E-01  -.2373848E-01  -.2557578E-01  -.2699106E-01
  -.2781880E-01  -.2785414E-01  -.2790518E-01  -.2788225E-01  -.2691384E-01
  -.2537731E-01  -.2377955E-01  -.2237504E-01  -.2089439E-01  -.1945644E-01
  -.1796603E-01  -.1610391E-01  -.1421794E-01  -.1201758E-01  -.9347768E-02
  -.6710167E-02  -.3960033E-02  -.1225186E-02   .1277707E-02   .3374389E-02
   .4447127E-02   .4999386E-02   .5601257E-02   .5461269E-02   .4839097E-02
   .4722958E-02   .4372985E-02   .3049264E-02   .6406862E-03  -.2675859E-02
  -.6597808E-02  -.1157207E-01  -.1676086E-01  -.2045074E-01  -.2399761E-01
  -.2856849E-01  -.3281922E-01  -.3606355E-01  -.3835546E-01  -.4017097E-01
  -.4116002E-01  -.4095564E-01  -.3981049E-01  -.3780734E-01  -.3543295E-01
  -.3318631E-01  -.3137465E-01  -.3034205E-01  -.3047924E-01  -.3141645E-01
  -.3271450E-01  -.3464114E-01  -.3682378E-01  -.3902381E-01  -.4123154E-01
  -.4302991E-01  -.4436805E-01  -.4571329E-01  -.4732664E-01  -.4786102E-01
  -.4758499E-01  -.4749727E-01  -.4669935E-01  -.4539794E-01  -.4401432E-01
  -.4170054E-01  -.3928506E-01  -.3703027E-01  -.3407186E-01  -.3104518E-01
  -.2753916E-01  -.2326136E-01  -.1928223E-01  -.1552787E-01  -.1165900E-01
  -.7900949E-02  -.4098193E-02  -.5029561E-03   .2963601E-02   .6296260E-02
   .9243109E-02   .1168752E-01   .1398710E-01   .1575546E-01   .1672158E-01
   .1759159E-01   .1758754E-01   .1662484E-01   .1551259E-01   .1480186E-01
   .1403441E-01   .1286518E-01   .1207287E-01   .1213134E-01   .1284450E-01
   .1410923E-01   .1606586E-01   .1823295E-01   .2091943E-01   .2370414E-01
   .2578738E-01   .2818328E-01   .3056528E-01   .3195525E-01   .3324255E-01
   .3381585E-01   .3328172E-01   .3249934E-01   .3054298E-01   .2725102E-01
   .2346163E-01   .1967208E-01   .1658341E-01   .1373465E-01   .1114478E-01
   .9416585E-02   .8413494E-02   .8161174E-02   .8438724E-02   .9243937E-02
   .1017112E-01   .1077181E-01   .1131888E-01   .1213868E-01   .1288650E-01
   .1369826E-01   .1461075E-01   .1550263E-01   .1632082E-01   .1740209E-01
   .1930784E-01   .2117366E-01   .2316602E-01   .2599574E-01   .2950230E-01
   .3325746E-01   .3635233E-01   .3890582E-01   .4171571E-01   .4366020E-01
   .4498988E-01   .4600943E-01   .4566632E-01   .4486806E-01   .4356037E-01
   .4158267E-01   .3939637E-01   .3626924E-01   .3271557E-01   .2997030E-01
   .2694878E-01   .2387216E-01   .2161437E-01   .1853101E-01   .1505020E-01
   .1204417E-01   .9172266E-02   .6664393E-02   .4420473E-02   .2585898E-02
   .7436930E-03  -.7130165E-03  -.1279946E-02  -.1886595E-02  -.2026381E-02
  -.2410854E-02  -.3376557E-02  -.3612237E-02  -.3625910E-02  -.3772783E-02
  -.4059597E-02  -.4023124E-02  -.3304642E-02  -.2330106E-02  -.1133547E-02
   .5315438E-03   .2538264E-02   .4957537E-02   .7859327E-02   .1017124E-01
   .1223368E-01   .1488657E-01   .1698706E-01   .1823148E-01   .1938263E-01
   .2004375E-01   .2020580E-01   .2015089E-01   .1968584E-01   .1947841E-01
   .1931582E-01   .1905807E-01   .1912256E-01   .1920762E-01   .1954654E-01
   .1960254E-01   .1871250E-01   .1740750E-01   .1553574E-01   .1298056E-01
   .9873603E-02   .6716226E-02   .4200911E-02   .2305539E-02   .1351445E-02
   .9070428E-03   .1216255E-02   .2491294E-02   .3597614E-02   .4013888E-02
   .4027391E-02   .3516452E-02   .2024973E-02  -.1161783E-03  -.3668605E-02
  -.8612376E-02  -.1310589E-01  -.1777788E-01  -.2270074E-01  -.2599291E-01
  -.2798332E-01  -.2962151E-01  -.3110228E-01  -.3156410E-01  -.3135792E-01
  -.3120509E-01  -.3082784E-01  -.3093032E-01  -.3103304E-01  -.3089546E-01
  -.3099658E-01  -.3103971E-01  -.3064948E-01  -.2880699E-01  -.2530163E-01
  -.2150415E-01  -.1716854E-01  -.1211807E-01  -.8216225E-02  -.5122566E-02
  -.1509263E-02   .1960916E-02   .5051270E-02   .8183823E-02   .1097004E-01
   .1330346E-01   .1597077E-01   .1822301E-01   .1926358E-01   .1963962E-01
   .1971565E-01   .1957929E-01   .1822707E-01   .1633603E-01   .1479761E-01
   .1230759E-01   .9558596E-02   .7948627E-02   .6795948E-02   .5691391E-02
   .5115754E-02   .5309521E-02   .6198623E-02   .7748758E-02   .9564649E-02
   .1111924E-01   .1193848E-01   .1134301E-01   .8980876E-02   .5521783E-02
   .9648876E-03  -.5040561E-02  -.1094135E-01  -.1639735E-01  -.2079377E-01
  -.2253193E-01  -.2229702E-01  -.2095866E-01  -.1809017E-01  -.1395996E-01
  -.9902807E-02  -.6350876E-02  -.2997426E-02  -.5586196E-03   .8445284E-03
   .2188084E-02   .3416262E-02   .4807486E-02   .6516956E-02   .8382935E-02
   .1061345E-01   .1289892E-01   .1488441E-01   .1658994E-01   .1738808E-01
   .1687327E-01   .1556920E-01   .1254227E-01   .7567327E-02   .1604612E-02
  -.4558453E-02  -.1106500E-01  -.1746612E-01  -.2218205E-01  -.2544099E-01
  -.2648532E-01  -.2560181E-01  -.2464650E-01  -.2354397E-01  -.2239747E-01
  -.2186712E-01  -.2169157E-01  -.2177697E-01  -.2221295E-01  -.2239796E-01
  -.2225687E-01  -.2186907E-01  -.2123324E-01  -.2026300E-01  -.1825770E-01
  -.1576563E-01  -.1356276E-01  -.1150691E-01  -.9556652E-02  -.8425022E-02
  -.8085735E-02  -.7520105E-02  -.7678213E-02  -.8409952E-02  -.8206568E-02
  -.7640582E-02  -.7408933E-02  -.6440520E-02  -.5082195E-02  -.4014656E-02
  -.2376136E-02  -.9178905E-03  -.5033487E-03  -.5090653E-03  -.1104906E-02
  -.2126846E-02  -.3270799E-02  -.4988479E-02  -.7116397E-02  -.9257390E-02
  -.1097183E-01  -.1264066E-01  -.1342923E-01  -.1341742E-01  -.1323911E-01
  -.1223436E-01  -.1135826E-01  -.1027683E-01  -.8805705E-02  -.7215839E-02
  -.5169746E-02  -.3018548E-02  -.6631510E-03   .7164880E-03   .1369092E-02
   .2319043E-02   .2468561E-02   .2290743E-02   .2529408E-02   .2631583E-02
   .2549715E-02   .2897892E-02   .3416147E-02   .3864049E-02   .4808118E-02
   .5869963E-02   .6570769E-02   .7221883E-02   .8059779E-02   .8752258E-02
   .8995751E-02   .9314805E-02   .9714439E-02   .1003976E-01   .1063895E-01
   .1106753E-01   .1172170E-01   .1241731E-01   .1293471E-01   .1427411E-01
   .1573033E-01   .1633251E-01   .1770737E-01   .1959878E-01   .2099818E-01
   .2315992E-01   .2488429E-01   .2638077E-01   .2803548E-01   .2887778E-01
   .2952889E-01   .2937683E-01   .2851487E-01   .2728162E-01   .2519849E-01
   .2310933E-01   .2130400E-01   .1922979E-01   .1764323E-01   .1634134E-01
   .1482625E-01   .1432905E-01   .1403660E-01   .1342151E-01   .1311384E-01
   .1258135E-01   .1218892E-01   .1205811E-01   .1147324E-01   .1011616E-01
   .8259338E-02   .5979685E-02   .3373667E-02   .9964598E-03  -.1475191E-02
  -.3876361E-02  -.5363109E-02  -.6398058E-02  -.7412529E-02  -.7498268E-02
  -.6980208E-02  -.6369146E-02  -.5261554E-02  -.4398432E-02  -.3651569E-02
  -.3138483E-02  -.3400530E-02  -.4176249E-02  -.4660764E-02  -.5223551E-02
  -.6809245E-02  -.8491970E-02  -.1037365E-01  -.1227934E-01  -.1358993E-01
  -.1420911E-01  -.1396272E-01  -.1369877E-01  -.1305662E-01  -.1130439E-01
  -.8950359E-02  -.6496628E-02  -.3714531E-02   .2150698E-03   .4713886E-02
   .9322457E-02   .1401835E-01   .1846326E-01   .2234406E-01   .2539300E-01
   .2832542E-01   .3078287E-01   .3231941E-01   .3369138E-01   .3442803E-01
   .3446660E-01   .3454956E-01   .3402071E-01   .3305705E-01   .3202145E-01
   .3071634E-01   .2975015E-01   .2908503E-01   .2864610E-01   .2856186E-01
   .2862300E-01   .2924520E-01   .3030471E-01   .3131413E-01   .3214517E-01
   .3276221E-01   .3332917E-01   .3314798E-01   .3275656E-01   .3275399E-01
   .3253958E-01   .3238810E-01   .3228184E-01   .3250409E-01   .3312370E-01
   .3311317E-01   .3268651E-01   .3248817E-01   .3187573E-01   .3094598E-01
   .2967679E-01   .2814216E-01   .2689578E-01   .2509531E-01   .2336584E-01
   .2211271E-01   .2017330E-01   .1834147E-01   .1687867E-01   .1518040E-01
   .1346469E-01   .1156955E-01   .9615961E-02   .7348440E-02   .4338974E-02
   .1279822E-02  -.1695477E-02  -.5332921E-02  -.9643159E-02  -.1412785E-01
  -.1837370E-01  -.2211685E-01  -.2500006E-01  -.2736157E-01  -.2935756E-01
  -.3018496E-01  -.2998175E-01  -.2932271E-01  -.2817517E-01  -.2614473E-01
  -.2354141E-01  -.2082818E-01  -.1823997E-01  -.1527736E-01  -.1175237E-01
  -.8542944E-02  -.5429913E-02  -.2606368E-02  -.7912885E-03   .9654652E-03
   .2573560E-02   .3477253E-02   .4844337E-02   .6154980E-02   .6990356E-02
   .7991131E-02   .9069812E-02   .9864813E-02   .9992278E-02   .9900469E-02
   .9716575E-02   .8784132E-02   .7146069E-02   .5664903E-02   .4210742E-02
   .2342471E-02   .2484483E-03  -.1770638E-02  -.3258422E-02  -.4640755E-02
  -.5732520E-02  -.5494071E-02  -.4165469E-02  -.2456108E-02  -.7525549E-03
   .4052484E-03   .2202370E-02   .5184160E-02   .7848920E-02   .1008054E-01
   .1192641E-01   .1325905E-01   .1465531E-01   .1572157E-01   .1625909E-01
   .1671573E-01   .1629474E-01   .1494184E-01   .1343462E-01   .1166396E-01
   .9327047E-02   .6526597E-02   .4458621E-02   .3360115E-02   .2005999E-02
   .1322133E-02   .1260838E-02   .8101459E-03   .1022126E-02   .1425436E-02
   .1444086E-02   .1229397E-02   .7098443E-03   .7108010E-03   .5710478E-03
  -.2101657E-06  -.4062177E-03  -.6792175E-03  -.3912147E-03   .3018425E-03
   .1017595E-02   .2291513E-02   .4058404E-02   .5702537E-02   .7419865E-02
   .9299621E-02   .1139513E-01   .1314676E-01   .1427635E-01   .1510079E-01
   .1557402E-01   .1580289E-01   .1541392E-01   .1418092E-01   .1267153E-01
   .1090424E-01   .8668570E-02   .6606713E-02   .4882384E-02   .3037193E-02
   .1765029E-02   .1290979E-02   .1724265E-02   .2885972E-02   .4004632E-02
   .5640936E-02   .7380796E-02   .8889956E-02   .1042379E-01   .1186836E-01
   .1296921E-01   .1400372E-01   .1529249E-01   .1595654E-01   .1624788E-01
   .1656617E-01   .1686819E-01   .1738317E-01   .1811230E-01   .1887299E-01
   .1927049E-01   .1988363E-01   .2069280E-01   .2128649E-01   .2176135E-01
   .2126301E-01   .1989176E-01   .1769539E-01   .1434867E-01   .1054524E-01
   .6254426E-02   .1747255E-02  -.2960627E-02  -.7993928E-02  -.1256459E-01
  -.1660264E-01  -.1993012E-01  -.2268142E-01  -.2505570E-01  -.2722683E-01
  -.2864130E-01  -.2847521E-01  -.2818397E-01  -.2808662E-01  -.2716728E-01
  -.2620646E-01  -.2546775E-01  -.2381162E-01  -.2225805E-01  -.2119488E-01
  -.1981458E-01  -.1863125E-01  -.1785906E-01  -.1733222E-01  -.1720421E-01
  -.1755106E-01  -.1801324E-01  -.1835591E-01  -.1850472E-01  -.1915658E-01
  -.1933236E-01  -.1869438E-01  -.1784632E-01  -.1621447E-01  -.1427206E-01
  -.1149050E-01  -.7781221E-02  -.3283159E-02   .1973181E-02   .6867265E-02
   .1131956E-01   .1490029E-01   .1713233E-01   .1867508E-01   .1996613E-01
   .2049407E-01   .2031572E-01   .1996873E-01   .1921881E-01   .1809451E-01
   .1701030E-01   .1648157E-01   .1586132E-01   .1456618E-01   .1383073E-01
   .1346337E-01   .1268159E-01   .1183690E-01   .1097431E-01   .9748061E-02
   .7822353E-02   .6053892E-02   .4371950E-02   .2198535E-02  -.2789306E-03
  -.2858645E-02  -.4489117E-02  -.5766147E-02  -.7019802E-02  -.7252017E-02
  -.6834820E-02  -.5838524E-02  -.4152218E-02  -.2083954E-02  -.1156463E-03
   .1925167E-02   .3832894E-02   .4965064E-02   .5883463E-02   .6656734E-02
   .6942149E-02   .6570727E-02   .5879036E-02   .5066071E-02   .3677803E-02
   .2531625E-02   .1499918E-02  -.6912271E-04  -.1438075E-02  -.2559840E-02
  -.3634593E-02  -.4296043E-02  -.3942395E-02  -.2629624E-02  -.4252675E-03
   .2684412E-02   .5755282E-02   .8472559E-02   .1099436E-01   .1273492E-01
   .1347726E-01   .1267955E-01   .1083411E-01   .9114378E-02   .7247581E-02
   .4756210E-02   .2350403E-02   .1112816E-02  -.7966393E-04  -.1093807E-02
  -.4956531E-03   .8115074E-03   .2200430E-02   .3782075E-02   .5439196E-02
   .7552106E-02   .9506014E-02   .1072672E-01   .1169616E-01   .1181621E-01
   .1077900E-01   .9566946E-02   .9049681E-02   .8850636E-02   .8181484E-02
   .7937402E-02   .8701094E-02   .9748822E-02   .1112713E-01   .1285892E-01
   .1434021E-01   .1633055E-01   .1886881E-01   .2104963E-01   .2350902E-01
   .2573097E-01   .2770510E-01   .2996170E-01   .3138293E-01   .3256959E-01
   .3396326E-01   .3494197E-01   .3504729E-01   .3459302E-01   .3404906E-01
   .3267914E-01   .3066125E-01   .2878253E-01   .2724919E-01   .2532449E-01
   .2381446E-01   .2261249E-01   .2108173E-01   .2024583E-01   .1919829E-01
   .1815365E-01   .1750358E-01   .1685482E-01   .1612943E-01   .1504886E-01
   .1392332E-01   .1279997E-01   .1143664E-01   .9825659E-02   .8670815E-02
   .7862952E-02   .6794302E-02   .5484182E-02   .3943767E-02   .2238865E-02
   .4872367E-03  -.1526426E-02  -.3501113E-02  -.5443436E-02  -.7666224E-02
  -.9838460E-02  -.1210735E-01  -.1416996E-01  -.1610030E-01  -.1811684E-01
  -.1962447E-01  -.2089782E-01  -.2179492E-01  -.2208797E-01  -.2233643E-01
  -.2213671E-01  -.2152760E-01  -.2075233E-01  -.1968299E-01  -.1862691E-01
  -.1740649E-01  -.1649692E-01  -.1571081E-01  -.1428108E-01  -.1319138E-01
  -.1196787E-01  -.1048480E-01  -.9885558E-02  -.9602121E-02  -.9619216E-02
  -.9839724E-02  -.1034887E-01  -.1158532E-01  -.1339712E-01  -.1553666E-01
  -.1741251E-01  -.1904760E-01  -.1980742E-01  -.1995567E-01  -.2018513E-01
  -.1981247E-01  -.1957260E-01  -.1897763E-01  -.1802172E-01  -.1767277E-01
  -.1677402E-01  -.1649474E-01  -.1632478E-01  -.1542448E-01  -.1528606E-01
  -.1492961E-01  -.1446069E-01  -.1410429E-01  -.1339524E-01  -.1270841E-01
  -.1167911E-01  -.9664785E-02  -.7754357E-02  -.6686449E-02  -.4904314E-02
  -.3195495E-02  -.2385680E-02  -.1441647E-02  -.5290348E-03   .3051939E-03
   .1084063E-02   .1396987E-02   .1342736E-02   .1660784E-02   .1815625E-02
   .6684484E-03  -.4051577E-03  -.6535987E-03  -.1793027E-02  -.3219567E-02
  -.3638785E-02  -.3818920E-02  -.3980642E-02  -.3650859E-02  -.3002780E-02
  -.2145090E-02  -.8719823E-03   .4467354E-03   .1763606E-02   .3531904E-02
   .5440848E-02   .7148015E-02   .8692206E-02   .9840435E-02   .1039773E-01
   .1059905E-01   .1051475E-01   .1011569E-01   .9824995E-02   .9184577E-02
   .8471974E-02   .8018551E-02   .7338481E-02   .7306885E-02   .7429229E-02
   .7300507E-02   .7650450E-02   .7959462E-02   .8175845E-02   .8243570E-02
   .7999528E-02   .7128281E-02   .5956958E-02   .4721055E-02   .2768296E-02
   .1144116E-02   .1918108E-04  -.9319183E-03  -.1566957E-02  -.2378359E-02
  -.2843086E-02  -.2819626E-02  -.2931739E-02  -.3270420E-02  -.3803731E-02
  -.3900267E-02  -.4243458E-02  -.4842228E-02  -.4647686E-02  -.4260466E-02
  -.3286191E-02  -.2342588E-02  -.1820490E-02  -.9907412E-03  -.2683005E-03
   .2082764E-03   .4121587E-03   .2359078E-03  -.6768599E-04  -.6485760E-03
  -.1758289E-02  -.2929635E-02  -.4277426E-02  -.5372338E-02  -.5788867E-02
  -.6241045E-02  -.6935510E-02  -.7278066E-02  -.7344436E-02  -.7317249E-02
  -.6698468E-02  -.6036170E-02  -.5466850E-02  -.4931208E-02  -.4727406E-02
  -.4723134E-02  -.5224652E-02  -.6249270E-02  -.7328931E-02  -.8365401E-02
  -.9582645E-02  -.1067479E-01  -.1119753E-01  -.1165204E-01  -.1220891E-01
  -.1201881E-01  -.1145938E-01  -.1122518E-01  -.1095172E-01  -.1069062E-01
  -.1072692E-01  -.1070860E-01  -.1051894E-01  -.1065123E-01  -.1080579E-01
  -.1072015E-01  -.1066674E-01  -.1041959E-01  -.9900113E-02  -.1011517E-01
  -.1076496E-01  -.1088245E-01  -.1097683E-01  -.1126336E-01  -.1151490E-01
  -.1135618E-01  -.1103800E-01  -.1043744E-01  -.9145079E-02  -.7684265E-02
  -.6233514E-02  -.4912448E-02  -.3754782E-02  -.2745406E-02  -.2118467E-02
  -.1802558E-02  -.1518557E-02  -.1270702E-02  -.1163251E-02  -.6191772E-03
   .4379490E-03   .1570412E-02   .2969181E-02   .4327801E-02   .5090309E-02
   .5835567E-02   .6764344E-02   .7250510E-02   .7386106E-02   .7071065E-02
   .5683883E-02   .3747742E-02   .1964746E-02  -.2979543E-03  -.3015749E-02
  -.5198372E-02  -.6885576E-02  -.8350377E-02  -.9479029E-02  -.1015195E-01
  -.1052578E-01  -.1096463E-01  -.1105035E-01  -.1085475E-01  -.1069787E-01
  -.1013016E-01  -.9204779E-02  -.8564103E-02  -.7720514E-02  -.6158547E-02
  -.4544269E-02  -.3141150E-02  -.2422257E-02  -.2073950E-02  -.1474722E-02
  -.7333608E-03   .3961619E-03   .1683405E-02   .2978473E-02   .4704904E-02
   .6884267E-02   .8986056E-02   .1086954E-01   .1258701E-01   .1454987E-01
   .1651432E-01   .1786356E-01   .1907935E-01   .2033382E-01   .2137254E-01
   .2196004E-01   .2180548E-01   .2084645E-01   .1957440E-01   .1823854E-01
   .1659904E-01   .1459285E-01   .1270440E-01   .1088080E-01   .9254117E-02
   .8298706E-02   .7756721E-02   .8072570E-02   .8835162E-02   .9983601E-02
   .1171225E-01   .1285849E-01   .1414185E-01   .1580545E-01   .1698938E-01
   .1832208E-01   .1949520E-01   .2022058E-01   .2099001E-01   .2152163E-01
   .2188066E-01   .2243107E-01   .2278457E-01   .2280010E-01   .2269226E-01
   .2259799E-01   .2280786E-01   .2280328E-01   .2269303E-01   .2267303E-01
   .2212334E-01   .2147053E-01   .2107162E-01   .2050471E-01   .1990997E-01
   .1977241E-01   .1954529E-01   .1891662E-01   .1864426E-01   .1870419E-01
   .1853958E-01   .1807939E-01   .1778205E-01   .1753961E-01   .1683770E-01
   .1602075E-01   .1536568E-01   .1447251E-01   .1281134E-01   .1057348E-01
   .8610485E-02   .6783240E-02   .5127935E-02   .3806458E-02   .2381301E-02
   .1369922E-02   .1045970E-02   .1210984E-02   .1540152E-02   .2150019E-02
   .3187565E-02   .3950780E-02   .4338585E-02   .4318801E-02   .3477815E-02
   .2121348E-02   .2725798E-03  -.2250850E-02  -.4757380E-02  -.7227252E-02
  -.9808340E-02  -.1195325E-01  -.1378554E-01  -.1533374E-01  -.1625290E-01
  -.1715901E-01  -.1797990E-01  -.1828044E-01  -.1874751E-01  -.1925042E-01
  -.1957912E-01  -.1989467E-01  -.1969035E-01  -.1966418E-01  -.1964741E-01
  -.1907136E-01  -.1867878E-01  -.1826306E-01  -.1800461E-01  -.1821462E-01
  -.1898110E-01  -.2002700E-01  -.2131317E-01  -.2336517E-01  -.2581382E-01
  -.2807256E-01  -.3028989E-01  -.3208938E-01  -.3339914E-01  -.3464841E-01
  -.3561983E-01  -.3632931E-01  -.3689346E-01  -.3750749E-01  -.3766515E-01
  -.3769072E-01  -.3777335E-01  -.3753206E-01  -.3722637E-01  -.3688065E-01
  -.3619378E-01  -.3476621E-01  -.3329922E-01  -.3179096E-01  -.2950247E-01
  -.2696160E-01  -.2471317E-01  -.2220369E-01  -.1898824E-01  -.1538291E-01
  -.1192350E-01  -.8481752E-02  -.4766865E-02  -.1405599E-02   .1654039E-02
   .4908636E-02   .8214337E-02   .1118905E-01   .1370590E-01   .1601535E-01
   .1798566E-01   .1964918E-01   .2100012E-01   .2199004E-01   .2289352E-01
   .2337670E-01   .2344754E-01   .2325203E-01   .2274543E-01   .2204584E-01
   .2118493E-01   .2058839E-01   .1969394E-01   .1855838E-01   .1787862E-01
   .1692187E-01   .1590209E-01   .1526832E-01   .1442816E-01   .1294853E-01
   .1135848E-01   .1033173E-01   .9770269E-02   .9269762E-02   .8788117E-02
   .8283252E-02   .7948276E-02   .8149836E-02   .8130829E-02   .8063473E-02
   .8581472E-02   .9118874E-02   .9661385E-02   .1021988E-01   .1075532E-01
   .1167606E-01   .1261655E-01   .1340742E-01   .1451373E-01   .1538251E-01
   .1582614E-01   .1607148E-01   .1563269E-01   .1514297E-01   .1478358E-01
   .1407251E-01   .1337082E-01   .1225032E-01   .1097304E-01   .1039651E-01
   .9700368E-02   .8997621E-02   .8392153E-02   .7651581E-02   .7303642E-02
   .6809071E-02   .5896884E-02   .4886672E-02   .3752786E-02   .2164909E-02
   .5672699E-03  -.9488468E-03  -.2819408E-02  -.4580213E-02  -.5902233E-02
  -.7256163E-02  -.8595375E-02  -.9376524E-02  -.1020596E-01  -.1112012E-01
  -.1186445E-01  -.1272038E-01  -.1343075E-01  -.1374506E-01  -.1377485E-01
  -.1411619E-01  -.1439000E-01  -.1383519E-01  -.1330102E-01  -.1294186E-01
  -.1212798E-01  -.1136077E-01  -.1086945E-01  -.1035322E-01  -.9787891E-02
  -.9263766E-02  -.8607953E-02  -.7850188E-02  -.7095160E-02  -.6278156E-02
  -.5755729E-02  -.5124932E-02  -.4276985E-02  -.3661533E-02  -.3370038E-02
  -.3142799E-02  -.2781205E-02  -.2789974E-02  -.3116436E-02  -.3612469E-02
  -.4275836E-02  -.4905044E-02  -.5493013E-02  -.6418163E-02  -.7294742E-02
  -.7842338E-02  -.8300048E-02  -.8576462E-02  -.8435873E-02  -.7548635E-02
  -.6414886E-02  -.5401001E-02  -.4219823E-02  -.3119290E-02  -.2449027E-02
  -.1441095E-02  -.3606563E-03   .1359686E-03  -.3996483E-04  -.8750655E-03
  -.1709077E-02  -.2873876E-02  -.4176408E-02  -.5509858E-02  -.7350310E-02
  -.9216000E-02  -.1132232E-01  -.1343969E-01  -.1510921E-01  -.1652177E-01
  -.1805167E-01  -.1934031E-01  -.2002205E-01  -.2104804E-01  -.2150423E-01
  -.2114010E-01  -.2077324E-01  -.2012756E-01  -.1955398E-01  -.1905509E-01
  -.1889629E-01  -.1895284E-01  -.1885940E-01  -.1898064E-01  -.1887451E-01
  -.1835630E-01  -.1824841E-01  -.1862794E-01  -.1861942E-01  -.1840312E-01
  -.1833843E-01  -.1788961E-01  -.1749629E-01  -.1713322E-01  -.1647579E-01
  -.1608504E-01  -.1601401E-01  -.1607584E-01  -.1635856E-01  -.1656757E-01
  -.1667612E-01  -.1718472E-01  -.1766687E-01  -.1817184E-01  -.1881196E-01
  -.1924954E-01  -.1929005E-01  -.1903809E-01  -.1863653E-01  -.1771948E-01
  -.1674029E-01  -.1562879E-01  -.1402326E-01  -.1227786E-01  -.1031021E-01
  -.8280017E-02  -.6287113E-02  -.3979743E-02  -.1770269E-02   .1788838E-03
   .2319380E-02   .4185895E-02   .6043780E-02   .8002814E-02   .9168718E-02
   .9823961E-02   .1070040E-01   .1177639E-01   .1241612E-01   .1308987E-01
   .1391930E-01   .1432695E-01   .1462765E-01   .1456176E-01   .1416495E-01
   .1366390E-01   .1299812E-01   .1168061E-01   .9805586E-02   .7894926E-02
   .5406650E-02   .2532481E-02  -.2757940E-03  -.2439748E-02  -.4077132E-02
  -.5925553E-02  -.7619368E-02  -.9140360E-02  -.1058534E-01  -.1101510E-01
  -.1034755E-01  -.9704848E-02  -.8984908E-02  -.7871798E-02  -.6733027E-02
  -.5108991E-02  -.2869408E-02  -.1113192E-02  -.1892371E-03   .6847544E-03
   .1362697E-02   .2056037E-02   .3110416E-02   .3499282E-02   .3868844E-02
   .4488325E-02   .4615117E-02   .5214344E-02   .6059988E-02   .6916289E-02
   .8053307E-02   .8451897E-02   .8662125E-02   .9589456E-02   .1004165E-01
   .1020139E-01   .1103123E-01   .1167191E-01   .1247461E-01   .1345284E-01
   .1410095E-01   .1483803E-01   .1548492E-01   .1648948E-01   .1733593E-01
   .1732919E-01   .1663830E-01   .1553330E-01   .1452660E-01   .1321975E-01
   .1147004E-01   .9607307E-02   .8019066E-02   .6407475E-02   .4466976E-02
   .2791654E-02   .1339519E-02   .2604496E-03  -.5828773E-03  -.1707860E-02
  -.2625440E-02  -.3331991E-02  -.4058132E-02  -.4718231E-02  -.5340800E-02
  -.5652964E-02  -.5342940E-02  -.4704691E-02  -.4118968E-02  -.3242954E-02
  -.2039369E-02  -.9563615E-03   .3652218E-03   .1965622E-02   .3421955E-02
   .5025876E-02   .6518262E-02   .8104763E-02   .9611860E-02   .1067231E-01
   .1182000E-01   .1247174E-01   .1237427E-01   .1209831E-01   .1207305E-01
   .1160157E-01   .1043841E-01   .9505014E-02   .8140762E-02   .6224570E-02
   .4596243E-02   .3077534E-02   .1282850E-02  -.1014499E-02  -.2954051E-02
  -.4478684E-02  -.5958642E-02  -.6995586E-02  -.8073180E-02  -.9522482E-02
  -.1117376E-01  -.1246116E-01  -.1365486E-01  -.1472139E-01  -.1529994E-01
  -.1586931E-01  -.1622602E-01  -.1634970E-01  -.1636508E-01  -.1604615E-01
  -.1523994E-01  -.1459493E-01  -.1424550E-01  -.1363723E-01  -.1332032E-01
  -.1301085E-01  -.1247035E-01  -.1229806E-01  -.1222946E-01  -.1248666E-01
  -.1272685E-01  -.1215463E-01  -.1118693E-01  -.1033036E-01  -.9429761E-02
  -.8291666E-02  -.7282792E-02  -.6331160E-02  -.5369537E-02  -.4935845E-02
  -.4732086E-02  -.4216837E-02  -.3806105E-02  -.3505679E-02  -.3383334E-02
  -.3383593E-02  -.3180792E-02  -.2716040E-02  -.2215511E-02  -.2039577E-02
  -.1931408E-02  -.1965429E-02  -.2482545E-02  -.3126174E-02  -.3362051E-02
  -.4062930E-02  -.5419341E-02  -.6855263E-02  -.8389349E-02  -.9668393E-02
  -.1096215E-01  -.1198263E-01  -.1237443E-01  -.1274194E-01  -.1307884E-01
  -.1340624E-01  -.1358986E-01  -.1368383E-01  -.1394332E-01  -.1407037E-01
  -.1394127E-01  -.1331679E-01  -.1216615E-01  -.1098810E-01  -.9782624E-02
  -.8209208E-02  -.6263585E-02  -.4341846E-02  -.2696716E-02  -.1049610E-02
   .3157115E-03   .1667824E-02   .3363278E-02   .4953429E-02   .6238168E-02
   .7126847E-02   .7984764E-02   .8966669E-02   .9740880E-02   .1025990E-01
   .1084414E-01   .1133778E-01   .1179998E-01   .1237260E-01   .1253867E-01
   .1243769E-01   .1238465E-01   .1219468E-01   .1172129E-01   .1108212E-01
   .1043310E-01   .9667266E-02   .8939125E-02   .8154790E-02   .6958374E-02
   .6169747E-02   .5820182E-02   .5078522E-02   .4209415E-02   .3201630E-02
   .2050047E-02   .9635491E-03  -.2863211E-03  -.1691602E-02  -.3623595E-02
  -.5686559E-02  -.7339604E-02  -.9263504E-02  -.1104075E-01  -.1275902E-01
  -.1476379E-01  -.1627855E-01  -.1756437E-01  -.1895655E-01  -.1994636E-01
  -.2018589E-01  -.2014821E-01  -.2039272E-01  -.2085259E-01  -.2165066E-01
  -.2245121E-01  -.2245056E-01  -.2283505E-01  -.2389763E-01  -.2436941E-01
  -.2486737E-01  -.2515343E-01  -.2504149E-01  -.2523405E-01  -.2531383E-01
  -.2527749E-01  -.2478938E-01  -.2397413E-01  -.2364146E-01  -.2269912E-01
  -.2092247E-01  -.1937757E-01  -.1786123E-01  -.1608282E-01  -.1419020E-01
  -.1281694E-01  -.1205031E-01  -.1078419E-01  -.9168375E-02  -.7726528E-02
  -.5704611E-02  -.3842516E-02  -.2775044E-02  -.1682295E-02  -.8883678E-03
  -.1135027E-03   .8920201E-03   .1326570E-02   .1532705E-02   .1505980E-02
   .1081129E-02   .4712057E-03  -.1338244E-03  -.7070006E-03  -.1655465E-02
  -.2418299E-02  -.3005539E-02  -.3530083E-02  -.3833287E-02  -.4568058E-02
  -.5146791E-02  -.5256934E-02  -.5752428E-02  -.6481147E-02  -.6887276E-02
  -.7138543E-02  -.7494825E-02  -.7965141E-02  -.8689624E-02  -.9387875E-02
  -.1046148E-01  -.1172674E-01  -.1236845E-01  -.1301295E-01  -.1357195E-01
  -.1374474E-01  -.1353402E-01  -.1281903E-01  -.1194359E-01  -.1098049E-01
  -.9672133E-02  -.8006580E-02  -.6264835E-02  -.4680951E-02  -.3416594E-02
  -.1985038E-02  -.6239525E-03   .2323781E-03   .1074977E-02   .1814157E-02
   .2545250E-02   .3278937E-02   .3985687E-02   .4700084E-02   .5368151E-02
   .6119888E-02   .6804448E-02   .7014756E-02   .7456977E-02   .8398371E-02
   .8632189E-02   .8589837E-02   .8681664E-02   .8625118E-02   .8826289E-02
   .8663487E-02   .8320272E-02   .8650136E-02   .8639590E-02   .8754117E-02
   .9824310E-02   .1104574E-01   .1200399E-01   .1283250E-01   .1365514E-01
   .1406332E-01   .1417177E-01   .1446402E-01   .1475867E-01   .1480177E-01
   .1502303E-01   .1485772E-01   .1406416E-01   .1354072E-01   .1304944E-01
   .1234447E-01   .1170781E-01   .1093540E-01   .1006386E-01   .9394879E-02
   .8541360E-02   .7610888E-02   .6676284E-02   .5492920E-02   .4549802E-02
   .3488540E-02   .2361626E-02   .1736760E-02   .1461384E-02   .1930387E-02
   .2899289E-02   .3660823E-02   .3788288E-02   .3707835E-02   .4077194E-02
   .4954664E-02   .5804976E-02   .6340280E-02   .6975502E-02   .7447809E-02
   .7819853E-02   .7857005E-02   .7952191E-02   .8576601E-02   .9015643E-02
   .9265270E-02   .9401074E-02   .9592779E-02   .9528099E-02   .8891675E-02
   .8131759E-02   .7457093E-02   .6410660E-02   .4885583E-02   .3414287E-02
   .1698301E-02  -.2325770E-03  -.1738280E-02  -.3232471E-02  -.4682489E-02
  -.6107338E-02  -.7674394E-02  -.8561255E-02  -.9103330E-02  -.9700077E-02
  -.1016818E-01  -.1026167E-01  -.1015625E-01  -.1031544E-01  -.1062026E-01
  -.1139659E-01  -.1241875E-01  -.1347918E-01  -.1483953E-01  -.1645534E-01
  -.1804724E-01  -.1922275E-01  -.2025753E-01  -.2124014E-01  -.2185951E-01
  -.2195658E-01  -.2168242E-01  -.2133030E-01  -.2078440E-01  -.1991085E-01
  -.1901488E-01  -.1802273E-01  -.1674397E-01  -.1533371E-01  -.1426479E-01
  -.1323346E-01  -.1190138E-01  -.1069798E-01  -.9461404E-02  -.8293567E-02
  -.7342533E-02  -.6711529E-02  -.6271860E-02  -.5983019E-02  -.5845721E-02
  -.5508564E-02  -.5265602E-02  -.5271166E-02  -.5310611E-02  -.5795986E-02
  -.6655395E-02  -.7057571E-02  -.7354464E-02  -.8052423E-02  -.9044238E-02
  -.1001300E-01  -.1089449E-01  -.1181454E-01  -.1278403E-01  -.1418907E-01
  -.1547803E-01  -.1646308E-01  -.1726137E-01  -.1780564E-01  -.1857441E-01
  -.1949311E-01  -.2023772E-01  -.2073945E-01  -.2120740E-01  -.2166139E-01
  -.2217994E-01  -.2250705E-01  -.2241594E-01  -.2175450E-01  -.2067834E-01
  -.1972478E-01  -.1884076E-01  -.1814963E-01  -.1778435E-01  -.1763549E-01
  -.1735801E-01  -.1709577E-01  -.1692968E-01  -.1668212E-01  -.1673010E-01
  -.1681792E-01  -.1670707E-01  -.1678057E-01  -.1704107E-01  -.1713714E-01
  -.1718067E-01  -.1726268E-01  -.1748263E-01  -.1786962E-01  -.1778810E-01
  -.1762180E-01  -.1769838E-01  -.1768574E-01  -.1762361E-01  -.1724213E-01
  -.1671621E-01  -.1613189E-01  -.1525263E-01  -.1434066E-01  -.1347633E-01
  -.1235539E-01  -.1086462E-01  -.9596619E-02  -.8502849E-02  -.7145905E-02
  -.5718676E-02  -.4437153E-02  -.3612458E-02  -.2559390E-02  -.1316803E-02
  -.5049724E-03   .3049944E-03   .1282511E-02   .2391120E-02   .3031513E-02
   .3597326E-02   .4456920E-02   .5048398E-02   .5410432E-02   .5562370E-02
   .5571937E-02   .5324599E-02   .5079545E-02   .4957857E-02   .4836266E-02
   .4791474E-02   .4706436E-02   .4748813E-02   .4792648E-02   .4793222E-02
   .5002371E-02   .5715528E-02   .6496752E-02   .6918509E-02   .7714640E-02
   .8320229E-02   .8487041E-02   .9114164E-02   .9831695E-02   .1041946E-01
   .1103510E-01   .1175332E-01   .1237482E-01   .1256223E-01   .1223385E-01
   .1127511E-01   .1077945E-01   .1070051E-01   .1036163E-01   .9964918E-02
   .9248599E-02   .8545309E-02   .8173666E-02   .8074741E-02   .7839828E-02
   .7535150E-02   .7418807E-02   .7133362E-02   .6623868E-02   .6074825E-02
   .5497897E-02   .4743098E-02   .3950938E-02   .3333731E-02   .2861599E-02
   .2618393E-02   .2379998E-02   .1986335E-02   .2466307E-02   .3649092E-02
   .4797218E-02   .6054533E-02   .7175976E-02   .8574787E-02   .9730790E-02
   .1062396E-01   .1208977E-01   .1333896E-01   .1426570E-01   .1562383E-01
   .1687908E-01   .1778497E-01   .1915506E-01   .2037704E-01   .2120392E-01
   .2234362E-01   .2345817E-01   .2438661E-01   .2548974E-01   .2623952E-01
   .2659623E-01   .2723109E-01   .2736209E-01   .2715900E-01   .2718630E-01
   .2661806E-01   .2569905E-01   .2497305E-01   .2432783E-01   .2376410E-01
   .2311969E-01   .2252343E-01   .2248129E-01   .2263108E-01   .2275949E-01
   .2306055E-01   .2366696E-01   .2423758E-01   .2425498E-01   .2421300E-01
   .2397213E-01   .2349314E-01   .2287805E-01   .2213273E-01   .2205961E-01
   .2235006E-01   .2255637E-01   .2321619E-01   .2403550E-01   .2468714E-01
   .2534307E-01   .2558921E-01   .2576407E-01   .2586804E-01   .2557882E-01
   .2523806E-01   .2458132E-01   .2370830E-01   .2291400E-01   .2196802E-01
   .2075340E-01   .1983014E-01   .1920391E-01   .1844000E-01   .1731190E-01
   .1631653E-01   .1579969E-01   .1493516E-01   .1410344E-01   .1321812E-01
   .1220291E-01   .1159926E-01   .1107794E-01   .1035735E-01   .9182007E-02
   .8262651E-02   .7748109E-02   .6980919E-02   .6663772E-02   .6906818E-02
   .6662698E-02   .6490151E-02   .6793827E-02   .6684327E-02   .6431842E-02
   .6543924E-02   .6490196E-02   .6324526E-02   .6213274E-02   .6012240E-02
   .6133902E-02   .6430417E-02   .6908794E-02   .7260527E-02   .7490480E-02
   .7937535E-02   .7965626E-02   .7822239E-02   .7840342E-02   .7663205E-02
   .7575984E-02   .7456094E-02   .6894959E-02   .6005589E-02   .5401109E-02
   .5472407E-02   .5444195E-02   .5279207E-02   .5303112E-02   .5453261E-02
   .5172697E-02   .4576051E-02   .4364886E-02   .3805233E-02   .3112183E-02
   .2679855E-02   .2335154E-02   .2295330E-02   .2369867E-02   .2648152E-02
   .2986116E-02   .3363774E-02   .3973800E-02   .4782174E-02   .5639692E-02
   .6367862E-02   .7320980E-02   .8046986E-02   .8399668E-02   .9133513E-02
   .9909341E-02   .1086704E-01   .1191170E-01   .1257520E-01   .1335764E-01
   .1408136E-01   .1500221E-01   .1597610E-01   .1625412E-01   .1644953E-01
   .1663503E-01   .1637782E-01   .1629021E-01   .1632814E-01   .1616951E-01
   .1599792E-01   .1545054E-01   .1509057E-01   .1474346E-01   .1368166E-01
   .1282415E-01   .1223601E-01   .1146950E-01   .1071651E-01   .9968929E-02
   .9396462E-02   .8814219E-02   .8355821E-02   .8057874E-02   .7438665E-02
   .7101782E-02   .6841639E-02   .6177480E-02   .5626179E-02   .5195059E-02
   .5056252E-02   .5127581E-02   .5070215E-02   .4677952E-02   .4428996E-02
   .4845000E-02   .4943019E-02   .4713369E-02   .4470338E-02   .3543421E-02
   .2888578E-02   .2754396E-02   .2525001E-02   .2876600E-02   .2983679E-02
   .2627212E-02   .2565503E-02   .2259443E-02   .1378576E-02   .8203969E-03
   .4022551E-03  -.4112134E-03  -.9407670E-03  -.1006267E-02  -.1237400E-02
  -.2011882E-02  -.2263556E-02  -.2293897E-02  -.2752419E-02  -.3452523E-02
  -.4569954E-02  -.5558408E-02  -.6357034E-02  -.7286533E-02  -.7816456E-02
  -.7993340E-02  -.8652369E-02  -.9692544E-02  -.1031526E-01  -.1039263E-01
  -.1062933E-01  -.1087204E-01  -.1107296E-01  -.1150181E-01  -.1169783E-01
  -.1187942E-01  -.1178140E-01  -.1137552E-01  -.1168769E-01  -.1186793E-01
  -.1140251E-01  -.1103768E-01  -.1069540E-01  -.1060384E-01  -.1024522E-01
  -.9276183E-02  -.8866526E-02  -.8548402E-02  -.7543171E-02  -.7198465E-02
  -.7279869E-02  -.6658096E-02  -.6341878E-02  -.6208477E-02  -.5894680E-02
  -.6173485E-02  -.6360623E-02  -.6120819E-02  -.6275828E-02  -.6393824E-02
  -.6014669E-02  -.6020082E-02  -.6353566E-02  -.6153989E-02  -.5420706E-02
  -.4783269E-02  -.4259649E-02  -.3692965E-02  -.3397262E-02  -.2991389E-02
  -.2428349E-02  -.2421588E-02  -.2590229E-02  -.2850677E-02  -.3457986E-02
  -.3953370E-02  -.4563256E-02  -.5342450E-02  -.5897513E-02  -.6157011E-02
  -.6434745E-02  -.6583125E-02  -.6590276E-02  -.6830072E-02  -.7058110E-02
  -.7317748E-02  -.7413338E-02  -.7555778E-02  -.7852409E-02  -.7458282E-02
  -.7247649E-02  -.7823500E-02  -.7891004E-02  -.7545076E-02  -.7852513E-02
  -.7807142E-02  -.7127174E-02  -.6659998E-02  -.6133685E-02  -.5900229E-02
  -.5491383E-02  -.4622793E-02  -.4002505E-02  -.3748526E-02  -.3775253E-02
  -.4159652E-02  -.4713364E-02  -.5278147E-02  -.6454439E-02  -.7625463E-02
  -.8018501E-02  -.8505784E-02  -.9098248E-02  -.9627926E-02  -.1046302E-01
  -.1068052E-01  -.1078612E-01  -.1088387E-01  -.9951671E-02  -.8584858E-02
  -.7540347E-02  -.7244512E-02  -.6726024E-02  -.5787491E-02  -.4538550E-02
  -.2647453E-02  -.1297114E-02  -.6664293E-03   .1508562E-03   .9469347E-03
   .1667270E-02   .2339408E-02   .2242471E-02   .2313902E-02   .2559914E-02
   .2340919E-02   .2790811E-02   .3165761E-02   .3112977E-02   .3432574E-02
   .3902581E-02   .4995445E-02   .5657180E-02   .5498270E-02   .5991231E-02
   .6657831E-02   .6941648E-02   .7050476E-02   .6901697E-02   .6171778E-02
   .5036670E-02   .4294065E-02   .3796112E-02   .3278045E-02   .2831807E-02
   .1936361E-02   .1310278E-02   .1094246E-02   .6257330E-03   .1612697E-03
  -.5346198E-03  -.1031892E-02  -.1403867E-02  -.2406257E-02  -.3453738E-02
  -.3997050E-02  -.4691183E-02  -.5690470E-02  -.6266052E-02  -.6676776E-02
  -.6901313E-02  -.6439942E-02  -.5697199E-02  -.4782429E-02  -.3676334E-02
  -.2316005E-02  -.8484663E-03   .6146198E-03   .1739744E-02   .2766575E-02
   .4556142E-02   .6183406E-02   .7625426E-02   .9295905E-02   .1081002E-01
   .1235222E-01   .1373119E-01   .1508247E-01   .1611174E-01   .1663171E-01
   .1723471E-01   .1752109E-01   .1764909E-01   .1749613E-01   .1711348E-01
   .1744348E-01   .1765316E-01   .1738476E-01   .1726864E-01   .1684630E-01
   .1611341E-01   .1582407E-01   .1590292E-01   .1558117E-01   .1507054E-01
   .1456570E-01   .1406005E-01   .1363057E-01   .1304296E-01   .1237770E-01
   .1169735E-01   .1135967E-01   .1097284E-01   .1019878E-01   .9740117E-02
   .9285109E-02   .8586521E-02   .8359003E-02   .7922491E-02   .7130484E-02
   .6560550E-02   .5982804E-02   .5701974E-02   .5658213E-02   .5863864E-02
   .6435959E-02   .7091745E-02   .7466296E-02   .7430521E-02   .7651947E-02
   .8128572E-02   .8193282E-02   .8371367E-02   .9038201E-02   .9459221E-02
   .9689320E-02   .1016459E-01   .1070896E-01   .1123029E-01   .1155463E-01
   .1149534E-01   .1153695E-01   .1145701E-01   .1110447E-01   .1086023E-01
   .1047718E-01   .9868380E-02   .9565936E-02   .9627388E-02   .9588213E-02
   .9474922E-02   .9302146E-02   .9435796E-02   .9784533E-02   .1024312E-01
   .1051381E-01   .1061465E-01   .1114601E-01   .1130989E-01   .1170994E-01
   .1201270E-01   .1165572E-01   .1158751E-01   .1144818E-01   .1160831E-01
   .1181853E-01   .1208872E-01   .1246003E-01   .1260546E-01   .1290236E-01
   .1308991E-01   .1321441E-01   .1343555E-01   .1348700E-01   .1325269E-01
   .1335607E-01   .1357814E-01   .1361515E-01   .1393071E-01   .1446043E-01
   .1488747E-01   .1542740E-01   .1631718E-01   .1717798E-01   .1839791E-01
   .1962885E-01   .2026827E-01   .2111678E-01   .2161651E-01   .2142826E-01
   .2129756E-01   .2100695E-01   .2093821E-01   .2125607E-01   .2117065E-01
   .2132779E-01   .2211951E-01   .2239309E-01   .2200616E-01   .2148252E-01
   .2104247E-01   .2070522E-01   .2008019E-01   .1904864E-01   .1785952E-01
   .1723095E-01   .1663419E-01   .1559823E-01   .1493640E-01   .1447056E-01
   .1417328E-01   .1413632E-01   .1429047E-01   .1446623E-01   .1438250E-01
   .1428473E-01   .1400737E-01   .1327318E-01   .1223577E-01   .1095115E-01
   .9643262E-02   .8254847E-02   .6595673E-02   .5769207E-02   .5168408E-02
   .3221090E-02   .1136586E-02  -.3349629E-03  -.1393496E-02  -.2752180E-02
  -.4065108E-02  -.4662019E-02  -.5343085E-02  -.5690591E-02  -.5797088E-02
  -.6128441E-02  -.6471703E-02  -.6678686E-02  -.6841113E-02  -.7211400E-02
  -.7730362E-02  -.8003096E-02  -.8185598E-02  -.8615023E-02  -.8824290E-02
  -.9436821E-02  -.1038371E-01  -.1091680E-01  -.1157513E-01  -.1205519E-01
  -.1245545E-01  -.1289829E-01  -.1292264E-01  -.1325239E-01  -.1397704E-01
  -.1450743E-01  -.1489958E-01  -.1522973E-01  -.1561544E-01  -.1583897E-01
  -.1604068E-01  -.1644242E-01  -.1653156E-01  -.1655944E-01  -.1686398E-01
  -.1682101E-01  -.1614133E-01  -.1573190E-01  -.1545640E-01  -.1470534E-01
  -.1399963E-01  -.1320311E-01  -.1202729E-01  -.1102423E-01  -.1033955E-01
  -.9304697E-02  -.8154389E-02  -.6906816E-02  -.5568478E-02  -.4698341E-02
  -.3965553E-02  -.3378076E-02  -.2826965E-02  -.2487952E-02  -.2453819E-02
  -.2476120E-02  -.2666756E-02  -.2716351E-02  -.3057628E-02  -.3706476E-02
  -.4149189E-02  -.4533007E-02  -.4987378E-02  -.5191932E-02  -.4770764E-02
  -.4438888E-02  -.4381643E-02  -.4616512E-02  -.5037207E-02  -.5157112E-02
  -.5392595E-02  -.5397456E-02  -.5196519E-02  -.5271088E-02  -.5437729E-02
  -.5359267E-02  -.5063199E-02  -.4927057E-02  -.4577318E-02  -.4118327E-02
  -.3898077E-02  -.3605550E-02  -.2976359E-02  -.2492011E-02  -.2129060E-02
  -.1552803E-02  -.1402832E-02  -.1424907E-02  -.1600467E-02  -.2069493E-02
  -.2667077E-02  -.3675588E-02  -.4515788E-02  -.5111516E-02  -.5712350E-02
  -.6371082E-02  -.7170378E-02  -.8090238E-02  -.9166036E-02  -.9759564E-02
  -.1020937E-01  -.1098511E-01  -.1167318E-01  -.1212383E-01  -.1242707E-01
  -.1283618E-01  -.1312543E-01  -.1334738E-01  -.1358046E-01  -.1394708E-01
  -.1430035E-01  -.1419847E-01  -.1434060E-01  -.1420622E-01  -.1348615E-01
  -.1284011E-01  -.1209351E-01  -.1161479E-01  -.1090190E-01  -.9687179E-02
  -.8547404E-02  -.7608133E-02  -.6891737E-02  -.6062027E-02  -.5077997E-02
  -.4066541E-02  -.3618858E-02  -.4084519E-02  -.4657716E-02  -.5202319E-02
  -.5937670E-02  -.6539576E-02  -.7021359E-02  -.7411266E-02  -.7758718E-02
  -.8187779E-02  -.8615276E-02  -.9142107E-02  -.9594135E-02  -.9583084E-02
  -.9417179E-02  -.9501735E-02  -.9612653E-02  -.9451588E-02  -.9213512E-02
  -.8905634E-02  -.8768541E-02  -.8758119E-02  -.8284874E-02  -.7509260E-02
  -.6757828E-02  -.5989067E-02  -.5347192E-02  -.5088431E-02  -.5248239E-02
  -.6384434E-02  -.8234230E-02  -.1031070E-01  -.1262019E-01  -.1437179E-01
  -.1567787E-01  -.1636135E-01  -.1583825E-01  -.1467577E-01  -.1267041E-01
  -.9694211E-02  -.5787807E-02  -.1403996E-02   .2218321E-02   .5333720E-02
   .8080464E-02   .1001313E-01   .1102556E-01   .1061321E-01   .9017189E-02
   .6916384E-02   .4399291E-02   .2111857E-02   .6063288E-03  -.3911005E-03
  -.7186124E-03  -.6325983E-03  -.2073443E-04   .1019055E-02   .1947162E-02
   .3245283E-02   .4558241E-02   .5658013E-02   .6523752E-02   .7351063E-02
   .7974147E-02   .7980515E-02   .8066047E-02   .7996546E-02   .7742053E-02
   .7499199E-02   .6836102E-02   .5867670E-02   .4510921E-02   .3209055E-02
   .1950734E-02   .3859162E-03  -.6467051E-03  -.1238860E-02  -.1686654E-02
  -.1931628E-02  -.1894294E-02  -.1468273E-02  -.5894139E-03   .8418745E-03
   .2055107E-02   .2916604E-02   .3864003E-02   .4628862E-02   .4747799E-02
   .4562280E-02   .4241552E-02   .3056928E-02   .1389171E-02  -.3156640E-03
  -.1962698E-02  -.3473031E-02  -.4731656E-02  -.5284484E-02  -.5628033E-02
  -.5491139E-02  -.4767262E-02  -.4247999E-02  -.3614094E-02  -.3300339E-02
  -.3127201E-02  -.2566473E-02  -.2194346E-02  -.1575831E-02  -.4893957E-03
   .3580219E-03   .7778657E-03   .7405663E-03   .2484206E-03   .2523084E-04
   .3615633E-03   .1421410E-02   .3183916E-02   .5045293E-02   .6864791E-02
   .8248691E-02   .8723510E-02   .8764338E-02   .8431985E-02   .7555310E-02
   .6401538E-02   .4660656E-02   .2690314E-02   .7839725E-03  -.8368786E-03
  -.1927785E-02  -.3232701E-02  -.4653498E-02  -.5404144E-02  -.5349070E-02
  -.5417106E-02  -.5510442E-02  -.5292578E-02  -.5018589E-02  -.4863286E-02
  -.4927353E-02  -.4372207E-02  -.3584245E-02  -.2815701E-02  -.2101302E-02
  -.1919230E-02  -.1726435E-02  -.1573985E-02  -.1651106E-02  -.1660424E-02
  -.1722514E-02  -.1663650E-02  -.1186162E-02  -.6150411E-03   .1661400E-03
   .8333941E-03   .1051046E-02   .1242828E-02   .1193960E-02   .1406558E-02
   .1820583E-02   .1929194E-02   .2476506E-02   .2797335E-02   .2200035E-02
   .1747660E-02   .1272940E-02   .2029459E-03  -.9179804E-03  -.1427617E-02
  -.1254931E-02  -.1553584E-02  -.1972172E-02  -.2110840E-02  -.2865931E-02
  -.3336007E-02  -.3184460E-02  -.3198639E-02  -.2812543E-02  -.1906348E-02
  -.1204045E-02  -.6100267E-03   .3898663E-03   .1544254E-02   .2102222E-02
   .2663394E-02   .3425860E-02   .3750748E-02   .3608921E-02   .3336446E-02
   .3168205E-02   .2848229E-02   .2601387E-02   .2370017E-02   .2038821E-02
   .1916165E-02   .1749645E-02   .1596959E-02   .1671094E-02   .1919490E-02
   .2388110E-02   .2691712E-02   .2947525E-02   .3258834E-02   .3448893E-02
   .3920154E-02   .4309013E-02   .4349572E-02   .4405670E-02   .4199503E-02
   .4026729E-02   .3922285E-02   .3429494E-02   .2930297E-02   .2625600E-02
   .2734038E-02   .2976484E-02   .2897076E-02   .3002312E-02   .3374968E-02
   .3819899E-02   .4342852E-02   .4350743E-02   .4357639E-02   .4804606E-02
   .5043049E-02   .5490371E-02   .5848821E-02   .5662578E-02   .5583070E-02
   .5268107E-02   .4642285E-02   .4054023E-02   .3159610E-02   .1985214E-02
   .7175171E-03  -.1745757E-03  -.7871767E-03  -.1447145E-02  -.1693305E-02
  -.1658599E-02  -.1498851E-02  -.1289326E-02  -.1404387E-02  -.1603402E-02
  -.1440945E-02  -.1092070E-02  -.8188003E-03  -.5468953E-03  -.2591608E-03
  -.3354298E-03  -.6234441E-03  -.7483529E-03  -.1170823E-02  -.1527147E-02
  -.1567390E-02  -.2213575E-02  -.3002131E-02  -.3314716E-02  -.3867876E-02
  -.4595372E-02  -.5395764E-02  -.6288805E-02  -.7071913E-02  -.7732989E-02
  -.8256199E-02  -.8942619E-02  -.9510566E-02  -.9687963E-02  -.9472318E-02
  -.8897173E-02  -.8698955E-02  -.8886229E-02  -.8609065E-02  -.8014404E-02
  -.7559270E-02  -.7419799E-02  -.7548317E-02  -.7725100E-02  -.7762771E-02
  -.7417798E-02  -.7070411E-02  -.7129522E-02  -.7429532E-02  -.7569858E-02
  -.7657746E-02  -.7956412E-02  -.7958589E-02  -.7937112E-02  -.8000188E-02
  -.7792397E-02  -.7797112E-02  -.7753243E-02  -.7452288E-02  -.7321183E-02
  -.7348865E-02  -.7301091E-02  -.7284084E-02  -.7386416E-02  -.7592335E-02
  -.7753291E-02  -.7920434E-02  -.8325770E-02  -.8780545E-02  -.9223416E-02
  -.9744993E-02  -.1030155E-01  -.1065935E-01  -.1086851E-01  -.1127913E-01
  -.1196975E-01  -.1259854E-01  -.1294231E-01  -.1297377E-01  -.1286482E-01
  -.1299337E-01  -.1306575E-01  -.1339978E-01  -.1432968E-01  -.1512522E-01
  -.1593454E-01  -.1678544E-01  -.1755061E-01  -.1817211E-01  -.1878565E-01
  -.1968111E-01  -.1994426E-01  -.2011953E-01  -.2033746E-01  -.1987961E-01
  -.1980468E-01  -.1988718E-01  -.1973300E-01  -.1969655E-01  -.1929175E-01
  -.1883743E-01  -.1872389E-01  -.1858332E-01  -.1833923E-01  -.1789852E-01
  -.1725488E-01  -.1621592E-01  -.1513805E-01  -.1460121E-01  -.1420860E-01
  -.1375736E-01  -.1303621E-01  -.1186655E-01  -.1072063E-01  -.9568531E-02
  -.8568015E-02  -.7779245E-02  -.6895815E-02  -.6091493E-02  -.5029860E-02
  -.4314919E-02  -.4256621E-02  -.3788638E-02  -.3360609E-02  -.3487007E-02
  -.3448812E-02  -.3388332E-02  -.3506053E-02  -.3613818E-02  -.3862815E-02
  -.4015631E-02  -.4019555E-02  -.4278282E-02  -.4465828E-02  -.4173799E-02
  -.3704462E-02  -.3463200E-02  -.3538293E-02  -.3518946E-02  -.3501143E-02
  -.3487143E-02  -.3216128E-02  -.3078282E-02  -.3019174E-02  -.2935038E-02
  -.2685001E-02  -.2456150E-02  -.2600346E-02  -.2236079E-02  -.1613395E-02
  -.1542371E-02  -.1318494E-02  -.1282734E-02  -.1633387E-02  -.1607754E-02
  -.1421142E-02  -.1309070E-02  -.1484107E-02  -.1583760E-02  -.1472603E-02
  -.1394029E-02  -.1097848E-02  -.5576147E-03  -.1674036E-03   .2715162E-03
   .1172906E-02   .1774409E-02   .2309250E-02   .2929499E-02   .3428663E-02
   .4204079E-02   .4758842E-02   .5217545E-02   .5579782E-02   .5574622E-02
   .5597715E-02   .5576923E-02   .5621337E-02   .5537596E-02   .5172359E-02
   .4932151E-02   .4491028E-02   .3925523E-02   .3295082E-02   .2413505E-02
   .1924285E-02   .1466837E-02   .7977826E-03   .4521118E-03  -.3468616E-04
  -.6586458E-03  -.9929100E-03  -.1329276E-02  -.1686549E-02  -.1891632E-02
  -.1942855E-02  -.1657746E-02  -.1345489E-02  -.8170809E-03  -.1249872E-03
   .3810461E-03   .1161014E-02   .1945007E-02   .2563720E-02   .3341464E-02
   .4123898E-02   .4807720E-02   .5262590E-02   .5121089E-02   .4557989E-02
   .3710720E-02   .2918866E-02   .2086851E-02   .1173058E-02   .7185145E-03
   .2389461E-03  -.4643696E-03  -.1241475E-02  -.1975138E-02  -.2035444E-02
  -.1745677E-02  -.1928235E-02  -.2022976E-02  -.1784437E-02  -.1895312E-02
  -.1981948E-02  -.1914567E-02  -.2249922E-02  -.2575259E-02  -.2676198E-02
  -.3301208E-02  -.4307433E-02  -.5014026E-02  -.5429027E-02  -.5610978E-02
  -.6078205E-02  -.6650419E-02  -.7316235E-02  -.8198405E-02  -.8585395E-02
  -.8860028E-02  -.9117756E-02  -.9556742E-02  -.1015192E-01  -.1052835E-01
  -.1080707E-01  -.1120166E-01  -.1187605E-01  -.1252858E-01  -.1293873E-01
  -.1296056E-01  -.1288265E-01  -.1267593E-01  -.1203650E-01  -.1118556E-01
  -.1013541E-01  -.8833850E-02  -.7611251E-02  -.6361378E-02  -.4909797E-02
  -.3462799E-02  -.2151944E-02  -.7466660E-03   .5258776E-03   .1433473E-02
   .1933442E-02   .2207604E-02   .2725630E-02   .2802402E-02   .2820361E-02
   .3263461E-02   .3344880E-02   .3455527E-02   .3591618E-02   .3424981E-02
   .3606643E-02   .3958606E-02   .4112606E-02   .4101887E-02   .4340003E-02
   .4871050E-02   .5184443E-02   .5469842E-02   .5752352E-02   .6000036E-02
   .6527628E-02   .7214449E-02   .7916363E-02   .8448534E-02   .9002094E-02
   .9801202E-02   .9886374E-02   .9788434E-02   .1009894E-01   .1002297E-01
   .9894860E-02   .9767724E-02   .9322272E-02   .9023315E-02   .8977620E-02
   .8928134E-02   .8946329E-02   .8702453E-02   .8173780E-02   .8042685E-02
   .8110565E-02   .8045158E-02   .7866919E-02   .7573890E-02   .7205355E-02
   .6498711E-02   .5943248E-02   .5846224E-02   .5534024E-02   .5023773E-02
   .4451480E-02   .3830903E-02   .3210148E-02   .2625298E-02   .2341990E-02
   .1781857E-02   .1058844E-02   .6280381E-03   .1391625E-03  -.5557715E-03
  -.1447144E-02  -.1829128E-02  -.1943176E-02  -.2231086E-02  -.2399117E-02
  -.2710804E-02  -.3201028E-02  -.3675479E-02  -.3929194E-02  -.3762544E-02
  -.3648694E-02  -.3987010E-02  -.4664080E-02  -.5408201E-02  -.5877060E-02
  -.6421352E-02  -.7004907E-02  -.7395171E-02  -.7775730E-02  -.8304652E-02
  -.8525143E-02  -.8217321E-02  -.8201938E-02  -.8136842E-02  -.7865112E-02
  -.7722879E-02  -.7414228E-02  -.6997129E-02  -.6415736E-02  -.6158737E-02
  -.5834500E-02  -.4858115E-02  -.4126836E-02  -.3578701E-02  -.2872973E-02
  -.2167497E-02  -.1538565E-02  -.8735015E-03  -.2020583E-03   .3078548E-03
   .8186551E-03   .1237462E-02   .1429815E-02   .1643541E-02   .1874200E-02
   .2065319E-02   .2077343E-02   .1785439E-02   .1667452E-02   .1486502E-02
   .1028960E-02   .8298021E-03   .8774922E-03   .9969266E-03   .1199050E-02
   .1354276E-02   .1584405E-02   .2112881E-02   .2399245E-02   .2269186E-02
   .1928946E-02   .1310146E-02   .7785660E-03   .1160714E-03  -.8736838E-03
  -.1772247E-02  -.2459783E-02  -.2874973E-02  -.3380648E-02  -.3803553E-02
  -.3720340E-02  -.3765498E-02  -.3935821E-02  -.4168992E-02  -.4518748E-02
  -.4726388E-02  -.5111170E-02  -.5363533E-02  -.5170265E-02  -.4927551E-02
  -.4701056E-02  -.4184319E-02  -.3527840E-02  -.2981947E-02  -.2697152E-02
  -.2606181E-02  -.2013317E-02  -.1417521E-02  -.1208399E-02  -.8705695E-03
  -.7721022E-03  -.6999638E-03  -.4259231E-03  -.2035721E-03   .5337320E-03
   .1729394E-02   .2481026E-02   .2880522E-02   .3457572E-02   .3845343E-02
   .4065100E-02   .4212652E-02   .4333379E-02   .4013736E-02   .3660212E-02
   .2811449E-02   .1249455E-02   .1338537E-03  -.9224026E-03  -.1912981E-02
  -.2035796E-02  -.2333198E-02  -.2717185E-02  -.2635822E-02  -.2435244E-02
  -.2091588E-02  -.1720554E-02  -.1608235E-02  -.1939953E-02  -.2272505E-02
  -.2896378E-02  -.3915610E-02  -.4849324E-02  -.5670909E-02  -.6431095E-02
  -.7043962E-02  -.7398530E-02  -.7472675E-02  -.7164916E-02  -.6649392E-02
  -.6105146E-02  -.5642273E-02  -.5181765E-02  -.4971835E-02  -.5111777E-02
  -.5270889E-02  -.5489314E-02  -.5798659E-02  -.6135864E-02  -.6293193E-02
  -.6615682E-02  -.6953440E-02  -.6952895E-02  -.6957235E-02  -.6848042E-02
  -.6689637E-02  -.6646667E-02  -.6550366E-02  -.6222998E-02  -.5711252E-02
  -.5500818E-02  -.5595455E-02  -.5426632E-02  -.4946345E-02  -.4366021E-02
  -.3963059E-02  -.3397958E-02  -.2541033E-02  -.2076865E-02  -.2019050E-02
  -.1936435E-02  -.1845592E-02  -.1799837E-02  -.1824952E-02  -.2104779E-02
  -.2379108E-02  -.2600231E-02  -.2619598E-02  -.2418417E-02  -.2426542E-02
  -.2404757E-02  -.2366782E-02  -.2291147E-02  -.2055981E-02  -.2184439E-02
  -.2274871E-02  -.1869258E-02  -.1658993E-02  -.1557574E-02  -.1133489E-02
  -.5770821E-03   .1182378E-03   .6380198E-03   .7207596E-03   .5427321E-03
   .6095887E-03   .1271162E-02   .2057113E-02   .2467896E-02   .2709300E-02
   .3153849E-02   .3697763E-02   .4208927E-02   .4370146E-02   .4369357E-02
   .4422818E-02   .4248387E-02   .4125082E-02   .4058035E-02   .3957233E-02
   .3880033E-02   .4038048E-02   .4285173E-02   .4297218E-02   .4369146E-02
   .4473769E-02   .4573220E-02   .4759678E-02   .5197675E-02   .5810214E-02
   .5913745E-02   .5593493E-02   .5554919E-02   .5552121E-02   .5503235E-02
   .5732541E-02   .5964176E-02   .6049837E-02   .6077635E-02   .6064182E-02
   .5757225E-02   .5301460E-02   .4881961E-02   .4192297E-02   .3602316E-02
   .3394840E-02   .3169886E-02   .3085318E-02   .3373250E-02   .3688756E-02
   .4122938E-02   .4877922E-02   .5628599E-02   .6139912E-02   .6559709E-02
   .6861923E-02   .7104195E-02   .7604185E-02   .8367568E-02   .8843994E-02
   .9130938E-02   .9780423E-02   .1034958E-01   .1093360E-01   .1159989E-01
   .1209701E-01   .1275468E-01   .1325138E-01   .1354372E-01   .1400796E-01
   .1458685E-01   .1502227E-01   .1532290E-01   .1578075E-01   .1639142E-01
   .1688796E-01   .1713895E-01   .1733963E-01   .1752261E-01   .1777725E-01
   .1842059E-01   .1908287E-01   .1911295E-01   .1868589E-01   .1839497E-01
   .1858361E-01   .1888498E-01   .1896170E-01   .1900715E-01   .1891017E-01
   .1871735E-01   .1862662E-01   .1839409E-01   .1816283E-01   .1782584E-01
   .1720556E-01   .1669934E-01   .1633353E-01   .1608202E-01   .1586385E-01
   .1568545E-01   .1563296E-01   .1541372E-01   .1494620E-01   .1415975E-01
   .1309764E-01   .1228768E-01   .1174273E-01   .1111940E-01   .1046674E-01
   .9846261E-02   .9216421E-02   .8827209E-02   .8451165E-02   .7795139E-02
   .7236577E-02   .6627541E-02   .5909521E-02   .5208560E-02   .4184930E-02
   .3069140E-02   .2069568E-02   .1099382E-02   .1285103E-03  -.9713592E-03
  -.2228474E-02  -.3580862E-02  -.4543549E-02  -.4775815E-02  -.4668943E-02
  -.4758618E-02  -.4935270E-02  -.4888491E-02  -.4644392E-02  -.4286100E-02
  -.3805629E-02  -.3356597E-02  -.2984976E-02  -.2448252E-02  -.1847961E-02
  -.1218539E-02  -.6214228E-03  -.8415031E-04   .4816766E-03   .8772725E-03
   .1190634E-02   .1423700E-02   .1273456E-02   .9582117E-03   .6466672E-03
   .2178608E-03  -.2052989E-03  -.5656610E-03  -.7379153E-03  -.9859403E-03
  -.1313811E-02  -.1044324E-02  -.5427932E-03  -.5798537E-04   .7396348E-03
   .1510324E-02   .2240565E-02   .3091457E-02   .3982292E-02   .4783330E-02
   .5303308E-02   .5649809E-02   .6097975E-02   .6558073E-02   .6705169E-02
   .6886418E-02   .7229544E-02   .7294615E-02   .7285355E-02   .7342696E-02
   .7424990E-02   .7801775E-02   .8065184E-02   .8017760E-02   .8149885E-02
   .8478910E-02   .8825464E-02   .9085021E-02   .9292478E-02   .9406127E-02
   .9367378E-02   .9356320E-02   .9388382E-02   .9170246E-02   .8993393E-02
   .8854049E-02   .8405885E-02   .8223978E-02   .8159811E-02   .7953007E-02
   .7931909E-02   .8077934E-02   .8263011E-02   .8619882E-02   .8963612E-02
   .9071554E-02   .9469178E-02   .9957720E-02   .9944166E-02   .9551282E-02
   .8951405E-02   .8274793E-02   .7838758E-02   .7494287E-02   .6981677E-02
   .6475487E-02   .6104113E-02   .5792639E-02   .5372179E-02   .5047270E-02
   .4804586E-02   .4450537E-02   .4264628E-02   .4209900E-02   .4056762E-02
   .3908874E-02   .3774755E-02   .3468686E-02   .3081095E-02   .2693832E-02
   .2054773E-02   .1346018E-02   .9183540E-03   .7732719E-03   .8244732E-03
   .8473989E-03   .8247899E-03   .8112609E-03   .8017772E-03   .9659441E-03
   .1120347E-02   .1059673E-02   .1096572E-02   .1153143E-02   .9574119E-03
   .6960738E-03   .5507535E-03   .3951485E-03   .2615912E-03   .1278608E-03
  -.2218353E-03  -.4565166E-03  -.6054832E-03  -.8929020E-03  -.1126849E-02
  -.1379164E-02  -.1640271E-02  -.1952504E-02  -.2396413E-02  -.2634401E-02
  -.2884249E-02  -.3202732E-02  -.3255124E-02  -.3321072E-02  -.3286734E-02
  -.3102032E-02  -.3063940E-02  -.3137935E-02  -.3291825E-02  -.3349291E-02
  -.3453126E-02  -.3802204E-02  -.4154377E-02  -.4494128E-02  -.4800898E-02
  -.5032281E-02  -.5227467E-02  -.5326580E-02  -.5197805E-02  -.4977199E-02
  -.4804765E-02  -.4477379E-02  -.4159555E-02  -.4016467E-02  -.3752876E-02
  -.3486243E-02  -.3326236E-02  -.3120621E-02  -.3049633E-02  -.2991216E-02
  -.2856821E-02  -.2668023E-02  -.2535245E-02  -.2577898E-02  -.2533046E-02
  -.2358248E-02  -.2204454E-02  -.2021804E-02  -.1816520E-02  -.1653957E-02
  -.1416684E-02  -.1253971E-02  -.1224331E-02  -.1177989E-02  -.1059057E-02
  -.8565617E-03  -.5583778E-03  -.3859564E-03  -.6419410E-03  -.9680337E-03
  -.1148509E-02  -.1368491E-02  -.1482681E-02  -.1626888E-02  -.1889063E-02
  -.2027255E-02  -.2157760E-02  -.2283978E-02  -.2346820E-02  -.2442555E-02
  -.2559509E-02  -.2652946E-02  -.2733014E-02  -.2799342E-02  -.2985483E-02
  -.3297884E-02  -.3469249E-02  -.3553459E-02  -.3680640E-02  -.3819316E-02
  -.4088379E-02  -.4511401E-02  -.4644542E-02  -.4473302E-02  -.4458749E-02
  -.4558420E-02  -.4788102E-02  -.5105137E-02  -.5268278E-02  -.5448409E-02
  -.5621708E-02  -.5733360E-02  -.5944950E-02  -.6148018E-02  -.6295645E-02
  -.6397553E-02  -.6390015E-02  -.6408313E-02  -.6557505E-02  -.6695403E-02
  -.6746884E-02  -.6733054E-02  -.6770619E-02  -.6807055E-02  -.6590932E-02
  -.6348459E-02  -.6371685E-02  -.6521858E-02  -.6710066E-02  -.6839256E-02
  -.6891565E-02  -.7001175E-02  -.7178485E-02  -.7348359E-02  -.7445580E-02
  -.7590429E-02  -.7664938E-02  -.7631617E-02  -.7755493E-02  -.7914170E-02
  -.7958961E-02  -.8012268E-02  -.8070371E-02  -.7985989E-02  -.7623024E-02
  -.7115370E-02  -.6852162E-02  -.6706949E-02  -.6297064E-02  -.5728340E-02
  -.5213877E-02  -.4750025E-02  -.4361441E-02  -.4022790E-02  -.3591599E-02
  -.3177484E-02  -.2836273E-02  -.2511778E-02  -.2255439E-02  -.2065516E-02
  -.1907781E-02  -.1736754E-02  -.1536096E-02  -.1363531E-02  -.1282917E-02
  -.1288300E-02  -.1301507E-02  -.1239881E-02  -.1211080E-02  -.1236866E-02
  -.1342075E-02  -.1538052E-02  -.1631049E-02  -.1663943E-02  -.1695503E-02
  -.1655035E-02  -.1607174E-02  -.1618619E-02  -.1725814E-02  -.1889399E-02
  -.2040455E-02  -.2151598E-02  -.2158449E-02  -.2135788E-02  -.2161876E-02
  -.2200869E-02  -.2158071E-02  -.2098882E-02  -.2067848E-02  -.2010112E-02
  -.1986412E-02  -.1989607E-02  -.2012943E-02  -.1984240E-02  -.1904706E-02
  -.1817172E-02  -.1672023E-02  -.1595094E-02  -.1574666E-02  -.1494127E-02
  -.1449824E-02  -.1485050E-02  -.1540847E-02  -.1521561E-02  -.1441516E-02
  -.1384013E-02  -.1404238E-02  -.1499500E-02  -.1557174E-02  -.1564701E-02
  -.1563682E-02  -.1545356E-02  -.1504582E-02  -.1390585E-02  -.1252825E-02
  -.1175582E-02  -.1106417E-02  -.1004162E-02  -.8972441E-03  -.8311231E-03
  -.7891794E-03  -.7182005E-03  -.6650939E-03  -.6803567E-03  -.6841709E-03
  -.7112449E-03  -.7626872E-03  -.7901198E-03  -.8355666E-03  -.8775073E-03
  -.8907217E-03  -.8648062E-03  -.8415627E-03  -.7933720E-03  -.7130871E-03
  -.6370772E-03  -.5375243E-03  -.4691455E-03  -.4043739E-03  -.2708452E-03
  -.1458462E-03  -.9145942E-04  -.9081815E-04  -.9889398E-04  -.6825653E-04
  -.3657192E-04  -.2119372E-04   .2911613E-04   .1074736E-03   .2081536E-03
   .3210379E-03   .3978140E-03   .4648313E-03   .5758756E-03   .6888584E-03
   .7941830E-03   .9142030E-03   .9940642E-03   .1087695E-02   .1253053E-02
   .1392980E-02   .1477790E-02   .1554552E-02   .1611261E-02   .1633958E-02
   .1662247E-02   .1723040E-02   .1771629E-02   .1775808E-02   .1766159E-02
   .1754924E-02   .1748811E-02   .1740908E-02   .1716251E-02   .1687381E-02
   .1674669E-02   .1670403E-02   .1612188E-02   .1511866E-02   .1429873E-02
   .1382602E-02   .1357833E-02   .1343986E-02   .1326325E-02   .1307126E-02
   .1286251E-02   .1263388E-02   .1250231E-02   .1230336E-02   .1232663E-02
   .1249994E-02   .1256921E-02   .1260997E-02   .1258782E-02   .1255819E-02
   .1272058E-02   .1274301E-02   .1243930E-02   .1233730E-02   .1207591E-02
   .1157291E-02   .1110140E-02   .1048212E-02   .1013806E-02   .1007582E-02
   .9711113E-03   .9201000E-03   .8673692E-03   .7957442E-03   .7374360E-03
   .7014281E-03   .6592194E-03   .6061307E-03   .5370579E-03   .4622883E-03
   .4092917E-03   .3475562E-03   .2780965E-03   .2322992E-03   .1934543E-03
   .1537404E-03   .1149308E-03   .8559836E-04   .6452464E-04   .3721910E-04
   .1603744E-04  -.3713657E-05  -.2884499E-04  -.4659022E-04  -.6692473E-04
  -.8651935E-04  -.1059524E-03  -.1251085E-03  -.1494568E-03  -.1612008E-03
  -.1617521E-03  -.1778498E-03  -.1905032E-03  -.2177083E-03  -.2419713E-03
  -.2496829E-03  -.2750984E-03  -.2897221E-03  -.2921835E-03  -.3073991E-03
  -.3172660E-03  -.3153269E-03  -.3163853E-03  -.3210844E-03  -.3161471E-03
  -.3144218E-03  -.3178079E-03  -.3112601E-03  -.3108501E-03  -.3088302E-03
  -.2976097E-03  -.3036236E-03  -.3087854E-03  -.2973981E-03  -.2961580E-03
  -.2988167E-03  -.2876549E-03  -.2840947E-03  -.2903318E-03  -.2875524E-03
  -.2867169E-03  -.2888581E-03  -.2875440E-03  -.2898307E-03  -.2894706E-03
  -.2911073E-03  -.2932375E-03  -.2895518E-03  -.2880667E-03  -.2827291E-03
  -.2751095E-03  -.2678112E-03  -.2616975E-03  -.2609776E-03  -.2622473E-03
  -.2581135E-03  -.2474560E-03  -.2384505E-03  -.2352635E-03  -.2323715E-03
  -.2239861E-03  -.2166622E-03  -.2147456E-03  -.2141700E-03  -.2087449E-03
  -.2032005E-03  -.2025425E-03  -.1997489E-03  -.1954329E-03  -.1922390E-03
  -.1900299E-03  -.1867848E-03  -.1830298E-03  -.1814322E-03  -.1792258E-03
  -.1763266E-03  -.1743618E-03  -.1717004E-03  -.1656082E-03  -.1613895E-03
  -.1590858E-03  -.1527223E-03  -.1492670E-03  -.1483938E-03  -.1455302E-03
  -.1418283E-03  -.1367654E-03  -.1336955E-03  -.1314498E-03  -.1264542E-03
  -.1206060E-03  -.1157705E-03  -.1116835E-03  -.1057317E-03  -.1005767E-03
  -.9688967E-04  -.9094856E-04  -.8541007E-04  -.8197073E-04  -.7775320E-04
  -.7162227E-04  -.6678534E-04  -.6313965E-04  -.5893530E-04  -.5391504E-04
  -.4964635E-04  -.4567998E-04  -.4014043E-04  -.3634839E-04  -.3267437E-04
  -.2789811E-04  -.2383990E-04  -.1929704E-04  -.1560819E-04  -.1192237E-04
  -.7400982E-05  -.4293739E-05  -.1253587E-05   .2632977E-05   .5575384E-05
   .8452179E-05   .1157980E-04   .1417397E-04   .1697820E-04   .1919158E-04
   .2142059E-04   .2406278E-04   .2618658E-04   .2821457E-04   .3020611E-04
   .3240202E-04   .3456178E-04   .3607800E-04   .3770130E-04   .3976572E-04
   .4152226E-04   .4290602E-04   .4437619E-04   .4585943E-04   .4724638E-04
   .4858996E-04   .4982124E-04   .5099046E-04   .5205950E-04   .5311480E-04
   .5411550E-04   .5496223E-04   .5585093E-04   .5665153E-04   .5733151E-04
   .5801044E-04   .5860638E-04   .5915086E-04   .5964039E-04   .6006925E-04
   .6045102E-04   .6077207E-04   .6104096E-04   .6125540E-04
