# Supplementary material for: Earthquake Response Analysis of Tall Reinforced Concrete Chimneys considering Eccentricity
Source: Hindawi journal article supplement (doi:10.1155/2020/1417969), 2020-03-11
Supplement: f1 [file 1417969.f1.zip › 1417969.f1/Four kinds of earthquake records/Stiff soil/BORREGO B-ELC-UP.txt]

PEER STRONG MOTION DATABASE RECORD. PROCESSING BY PACIFIC ENGINEERING.
BORREGO MOUNTAIN 10/21/42 1622, EL CENTRO ARRAY #9,  UP (USGS STATION 117)
ACCELERATION TIME HISTORY IN UNITS OF G. FILTER POINTS: HP=0.2 Hz LP=20.0 Hz
NPTS=  8000, DT= .00500 SEC
  -.9256722E-05  -.1086798E-04  -.7891642E-05  -.6397069E-06   .1233858E-04
   .2565239E-04   .3515011E-04   .3415533E-04   .2799191E-04   .2272170E-04
   .2777436E-04   .4517279E-04   .7750774E-04   .1205315E-03   .1734508E-03
   .2309587E-03   .2862002E-03   .3056276E-03   .2635328E-03   .1598728E-03
   .1887904E-04  -.1346007E-03  -.2806134E-03  -.4166597E-03  -.5429625E-03
  -.6147732E-03  -.5662020E-03  -.3934891E-03  -.1441037E-03   .1107411E-03
   .3244461E-03   .4800132E-03   .5978235E-03   .7029940E-03   .7632270E-03
   .6868706E-03   .4448575E-03   .8869188E-04  -.2865399E-03  -.6035649E-03
  -.8232719E-03  -.9410308E-03  -.9776092E-03  -.9975052E-03  -.1060419E-02
  -.1201808E-02  -.1319518E-02  -.1267702E-02  -.9997170E-03  -.5842995E-03
  -.1134881E-03   .3889184E-03   .9425509E-03   .1525022E-02   .1978889E-02
   .1966319E-02   .1325984E-02   .2234532E-03  -.9982998E-03  -.2036738E-02
  -.2739944E-02  -.3139092E-02  -.3361040E-02  -.3474420E-02  -.3198073E-02
  -.2299973E-02  -.9221436E-03   .5767529E-03   .1850433E-02   .2616939E-02
   .2806088E-02   .2620108E-02   .2354884E-02   .1957057E-02   .1245722E-02
   .3034065E-03  -.5954203E-03  -.1003022E-02  -.6753189E-03   .2413285E-03
   .1360652E-02   .2295710E-02   .2808357E-02   .2856797E-02   .2412899E-02
   .1532321E-02   .4399844E-03  -.5910619E-03  -.1366224E-02  -.1847812E-02
  -.2183712E-02  -.2564355E-02  -.3107019E-02  -.3824276E-02  -.4607348E-02
  -.4706538E-02  -.3427367E-02  -.9258922E-03   .2127340E-02   .4965937E-02
   .7142583E-02   .8561649E-02   .9228299E-02   .8596780E-02   .6373154E-02
   .3139770E-02  -.1257422E-03  -.2596185E-02  -.3957950E-02  -.4399035E-02
  -.4375305E-02  -.3858830E-02  -.2576450E-02  -.6989863E-03   .1251398E-02
   .2736831E-02   .3494117E-02   .3505421E-02   .2759519E-02   .1406392E-02
  -.1014974E-03  -.1278073E-02  -.1662923E-02  -.1004689E-02   .5494292E-03
   .2512544E-02   .4345475E-02   .5646343E-02   .6061994E-02   .5425887E-02
   .4018288E-02   .2364668E-02   .9850548E-03   .1587155E-03  -.9710087E-04
  -.8229469E-05  -.6305601E-04  -.7136751E-03  -.2015642E-02  -.3766486E-02
  -.5635696E-02  -.7421497E-02  -.9131670E-02  -.1089825E-01  -.1273193E-01
  -.1451695E-01  -.1512530E-01  -.1296867E-01  -.7728537E-02  -.6815783E-03
   .6372784E-02   .1201476E-01   .1563635E-01   .1604428E-01   .1268924E-01
   .6957294E-02   .1080755E-02  -.3021293E-02  -.4555392E-02  -.3843583E-02
  -.1915827E-02   .5299074E-03   .3160336E-02   .5543865E-02   .7224574E-02
   .7887081E-02   .7553441E-02   .6592432E-02   .5527704E-02   .4798979E-02
   .4504006E-02   .4474224E-02   .4555405E-02   .4679922E-02   .5029221E-02
   .6004074E-02   .7777324E-02   .1004775E-01   .1227363E-01   .1340143E-01
   .1255290E-01   .9867632E-02   .6263848E-02   .2588276E-02  -.9687722E-03
  -.4459270E-02  -.7810280E-02  -.1092410E-01  -.1377234E-01  -.1639389E-01
  -.1829835E-01  -.1828340E-01  -.1585462E-01  -.1191008E-01  -.7883956E-02
  -.4805763E-02  -.2892909E-02  -.1897235E-02  -.1396239E-02  -.2129819E-02
  -.4837806E-02  -.8951613E-02  -.1310071E-01  -.1572291E-01  -.1603141E-01
  -.1436076E-01  -.1139833E-01  -.7962251E-02  -.4967705E-02  -.3051767E-02
  -.2376517E-02  -.2588423E-02  -.2917126E-02  -.2660235E-02  -.1560421E-02
   .2501435E-03   .2435361E-02   .4648576E-02   .6581532E-02   .7365327E-02
   .5918529E-02   .2582217E-02  -.9503715E-03  -.3128324E-02  -.3311173E-02
  -.1688093E-02   .9418028E-03   .3551607E-02   .5352307E-02   .6053585E-02
   .5879867E-02   .5301199E-02   .4777638E-02   .4602783E-02   .4855609E-02
   .5233692E-02   .5238377E-02   .4638855E-02   .3597087E-02   .2483750E-02
   .1877714E-02   .2314279E-02   .3815999E-02   .5897708E-02   .7915126E-02
   .9393291E-02   .1016715E-01   .1029652E-01   .9348677E-02   .6808794E-02
   .2985114E-02  -.1237204E-02  -.4908078E-02  -.7519866E-02  -.9066370E-02
  -.9972643E-02  -.1073880E-01  -.1149358E-01  -.1124260E-01  -.9181962E-02
  -.5707587E-02  -.1895440E-02   .1231639E-02   .3179232E-02   .4065871E-02
   .4340773E-02   .3974194E-02   .2047096E-02  -.1802500E-02  -.6577072E-02
  -.1030503E-01  -.1153372E-01  -.1026545E-01  -.7437924E-02  -.4149305E-02
  -.1335907E-02   .3769693E-03   .8424412E-03   .4156326E-03  -.1092899E-03
  -.2712578E-05   .9780022E-03   .2690776E-02   .4764834E-02   .6788116E-02
   .7804728E-02   .6952509E-02   .4361670E-02   .9621863E-03  -.2121183E-02
  -.3691637E-02  -.3062171E-02  -.6141246E-03   .2565934E-02   .5312481E-02
   .6831593E-02   .6381391E-02   .3761964E-02  -.2267681E-03  -.4404373E-02
  -.7732259E-02  -.9770092E-02  -.1060533E-01  -.1076136E-01  -.1079948E-01
  -.1122862E-01  -.1221275E-01  -.1351704E-01  -.1248631E-01  -.6721819E-02
   .3194551E-02   .1478200E-01   .2513464E-01   .3035627E-01   .2768030E-01
   .1833416E-01   .6277175E-02  -.4133742E-02  -.1013181E-01  -.1088004E-01
  -.7541702E-02  -.2523929E-02   .1679782E-02   .3486379E-02   .2803109E-02
   .5485046E-03  -.2261070E-02  -.4811953E-02  -.6684648E-02  -.7767094E-02
  -.8199127E-02  -.8071826E-02  -.7334792E-02  -.6029749E-02  -.4459734E-02
  -.2923397E-02  -.1219704E-02   .9454514E-03   .2687776E-02   .2977021E-02
   .1743901E-02  -.3178563E-03  -.2283244E-02  -.3435695E-02  -.3040023E-02
  -.5336621E-03   .3776533E-02   .8786083E-02   .1297894E-01   .1446176E-01
   .1234751E-01   .7582333E-02   .2014563E-02  -.2589243E-02  -.5294303E-02
  -.6026067E-02  -.4891272E-02  -.1934802E-02   .2182990E-02   .6352972E-02
   .9526734E-02   .1124042E-01   .1161104E-01   .1114562E-01   .9573959E-02
   .6607175E-02   .2816199E-02  -.8177042E-03  -.3483704E-02  -.4898921E-02
  -.5320658E-02  -.5309521E-02  -.5469316E-02  -.6172424E-02  -.7255250E-02
  -.7532461E-02  -.6048135E-02  -.3035504E-02   .5572740E-03   .3736283E-02
   .5945135E-02   .7181308E-02   .7801725E-02   .7974831E-02   .6843758E-02
   .3762660E-02  -.6619832E-03  -.5221610E-02  -.8829600E-02  -.1104725E-01
  -.1208057E-01  -.1249636E-01  -.1228253E-01  -.1046392E-01  -.6593666E-02
  -.1514821E-02   .3412346E-02   .7031672E-02   .8287347E-02   .6469903E-02
   .2168699E-02  -.2955311E-02  -.6823112E-02  -.7256335E-02  -.3375643E-02
   .3588887E-02   .1144666E-01   .1809648E-01   .2230410E-01   .2244943E-01
   .1757282E-01   .8918178E-02  -.7980615E-03  -.8960492E-02  -.1412353E-01
  -.1633765E-01  -.1668353E-01  -.1667561E-01  -.1751354E-01  -.1958432E-01
  -.2004753E-01  -.1590633E-01  -.7463108E-02   .2891735E-02   .1234690E-01
   .1926195E-01   .2340315E-01   .2556531E-01   .2499026E-01   .2049728E-01
   .1297491E-01   .4847536E-02  -.1436970E-02  -.4658280E-02  -.5000995E-02
  -.3367531E-02   .4051515E-04   .4872953E-02   .9894750E-02   .1372655E-01
   .1554778E-01   .1537576E-01   .1366044E-01   .1041730E-01   .5858474E-02
   .9472064E-03  -.3207596E-02  -.5888719E-02  -.7044041E-02  -.7164984E-02
  -.6989615E-02  -.7085260E-02  -.6802872E-02  -.4669413E-02  -.2277501E-03
   .5558999E-02   .1079475E-01   .1284261E-01   .1033440E-01   .4395977E-02
  -.2568748E-02  -.8211995E-02  -.1128618E-01  -.1174068E-01  -.1024265E-01
  -.7088272E-02  -.2736314E-02   .1785525E-02   .5404424E-02   .7513500E-02
   .8152382E-02   .7873749E-02   .7421249E-02   .7427073E-02   .8143044E-02
   .8757824E-02   .7810839E-02   .4773741E-02   .3265646E-03  -.4291219E-02
  -.8021798E-02  -.9839236E-02  -.9404288E-02  -.7490818E-02  -.5371117E-02
  -.4155941E-02  -.4347886E-02  -.5687936E-02  -.7118762E-02  -.7633434E-02
  -.6956478E-02  -.5387124E-02  -.3480655E-02  -.1692830E-02  -.1510753E-03
   .1263777E-02   .2659937E-02   .4121618E-02   .5659342E-02   .7276906E-02
   .8931391E-02   .1052331E-01   .1119066E-01   .9996349E-02   .7017661E-02
   .3179867E-02  -.4030175E-03  -.2998231E-02  -.4458343E-02  -.5106159E-02
  -.5367712E-02  -.5597763E-02  -.6119973E-02  -.7119520E-02  -.8558710E-02
  -.9588870E-02  -.9201901E-02  -.7252717E-02  -.4376547E-02  -.1423232E-02
   .1383619E-02   .4328738E-02   .7499373E-02   .1029944E-01   .1071207E-01
   .7403416E-02   .1255919E-02  -.5635791E-02  -.1101101E-01  -.1356323E-01
  -.1338938E-01  -.1138773E-01  -.8717407E-02  -.6552661E-02  -.5656691E-02
  -.5939518E-02  -.6789845E-02  -.7692044E-02  -.8314048E-02  -.8544580E-02
  -.8345727E-02  -.7720697E-02  -.6724509E-02  -.5521762E-02  -.4276060E-02
  -.3095825E-02  -.1711379E-02   .2398413E-03   .2784762E-02   .5626349E-02
   .8383882E-02   .1071647E-01   .1178073E-01   .1051709E-01   .6931962E-02
   .2144108E-02  -.2380893E-02  -.5630331E-02  -.7320777E-02  -.7860225E-02
  -.7932068E-02  -.7910838E-02  -.6982637E-02  -.4435553E-02  -.6945605E-03
   .3194430E-02   .6280252E-02   .8148432E-02   .8907998E-02   .8317150E-02
   .6106372E-02   .2813523E-02  -.5149176E-03  -.2911772E-02  -.3955195E-02
  -.3808131E-02  -.3002797E-02  -.1797299E-02  -.2392897E-03   .1409191E-02
   .2777790E-02   .3636892E-02   .3974739E-02   .3198279E-02   .3811205E-03
  -.4501417E-02  -.1039555E-01  -.1595975E-01  -.2022441E-01  -.2282068E-01
  -.2273268E-01  -.1910061E-01  -.1276920E-01  -.5728132E-02   .2934551E-04
   .3454422E-02   .4607313E-02   .4398755E-02   .3996452E-02   .4386394E-02
   .6000227E-02   .8389306E-02   .9641001E-02   .8227899E-02   .4416879E-02
  -.4282887E-03  -.4812552E-02  -.7860395E-02  -.9377660E-02  -.8830662E-02
  -.5392632E-02   .5392680E-03   .7363634E-02   .1324826E-01   .1710534E-01
   .1878809E-01   .1858119E-01   .1589343E-01   .1059219E-01   .3990844E-02
  -.2059220E-02  -.6096621E-02  -.6825179E-02  -.3766104E-02   .1905187E-02
   .8088285E-02   .1281363E-01   .1486114E-01   .1406207E-01   .1132216E-01
   .8026622E-02   .5403425E-02   .4073614E-02   .4064763E-02   .4988860E-02
   .6274486E-02   .7330379E-02   .7782052E-02   .7576327E-02   .6893880E-02
   .5971292E-02   .4904260E-02   .3739543E-02   .2578586E-02   .1525402E-02
   .6031652E-03  -.5030750E-03  -.2313495E-02  -.4975184E-02  -.8194757E-02
  -.1146260E-01  -.1426637E-01  -.1520343E-01  -.1323533E-01  -.9001482E-02
  -.4093329E-02  -.5898930E-03   .9990514E-04  -.1960441E-02  -.5542738E-02
  -.9095411E-02  -.1144460E-01  -.1213953E-01  -.1130792E-01  -.9220250E-02
  -.6337775E-02  -.3381547E-02  -.9928103E-03   .4335041E-03   .7505529E-03
   .1331077E-03  -.8975957E-03  -.1782412E-02  -.2065791E-02  -.1472536E-02
   .3293875E-06   .2068610E-02   .5112569E-02   .9430029E-02   .1385327E-01
   .1602076E-01   .1454592E-01   .1011004E-01   .4564036E-02  -.1969013E-03
  -.3080974E-02  -.3981993E-02  -.3563420E-02  -.2722533E-02  -.1717811E-02
   .2165810E-03   .3550632E-02   .7757587E-02   .1186701E-01   .1503653E-01
   .1653133E-01   .1492262E-01   .9641871E-02   .2111961E-02  -.5452966E-02
  -.1118168E-01  -.1437850E-01  -.1540593E-01  -.1521607E-01  -.1336301E-01
  -.9257850E-02  -.3771820E-02   .1541337E-02   .5336167E-02   .7152870E-02
   .7367178E-02   .6910388E-02   .6724031E-02   .7318551E-02   .7211520E-02
   .4693720E-02  -.7438152E-04  -.5783918E-02  -.1088047E-01  -.1451241E-01
  -.1658903E-01  -.1757337E-01  -.1656861E-01  -.1239166E-01  -.5552512E-02
   .2065858E-02   .8488897E-02   .1259404E-01   .1445824E-01   .1496250E-01
   .1515677E-01   .1417508E-01   .1086479E-01   .5798160E-02   .5054790E-03
  -.3536900E-02  -.5689039E-02  -.6209016E-02  -.5952517E-02  -.5784014E-02
  -.5277043E-02  -.3017215E-02   .1429698E-02   .7100879E-02   .1252487E-01
   .1660638E-01   .1907982E-01   .2037668E-01   .2110973E-01   .1989678E-01
   .1478824E-01   .6104542E-02  -.3993030E-02  -.1297834E-01  -.1923345E-01
  -.2144356E-01  -.1812886E-01  -.9664439E-02   .1078700E-02   .1066214E-01
   .1669059E-01   .1866931E-01   .1765783E-01   .1546325E-01   .1288838E-01
   .9623542E-02   .5687535E-02   .1847081E-02  -.1023871E-02  -.2474774E-02
  -.2650590E-02  -.1728571E-02   .2028929E-03   .2681499E-02   .4864245E-02
   .5513349E-02   .3731877E-02  -.2169266E-03  -.5218147E-02  -.9956353E-02
  -.1353363E-01  -.1567031E-01  -.1661590E-01  -.1647082E-01  -.1483264E-01
  -.1168450E-01  -.7837428E-02  -.4335566E-02  -.1950519E-02  -.1093746E-02
  -.1808749E-02  -.3539447E-02  -.5394326E-02  -.6557821E-02  -.6639386E-02
  -.5699206E-02  -.4136718E-02  -.2434932E-02  -.1007610E-02  -.6267678E-04
   .3672361E-03   .3732762E-03  -.2817395E-03  -.1794138E-02  -.3889645E-02
  -.6015411E-02  -.7182597E-02  -.6708225E-02  -.4837430E-02  -.2370943E-02
  -.1795115E-03   .1290604E-02   .2123175E-02   .2666580E-02   .3214052E-02
   .3952566E-02   .4919491E-02   .5980136E-02   .6883687E-02   .7500640E-02
   .7607424E-02   .7104580E-02   .6220048E-02   .5313937E-02   .4650985E-02
   .4067101E-02   .3241980E-02   .2084677E-02   .7050205E-03  -.5103409E-03
  -.9893217E-03  -.4985248E-03   .5370508E-03   .1181741E-02   .6883108E-03
  -.9625459E-03  -.3297279E-02  -.5655064E-02  -.7509428E-02  -.8173659E-02
  -.7307183E-02  -.5319760E-02  -.3008823E-02  -.1092515E-02   .2976688E-03
   .1471700E-02   .2697807E-02   .4055782E-02   .5210949E-02   .5794360E-02
   .5562168E-02   .4194642E-02   .1735853E-02  -.1687635E-02  -.5902444E-02
  -.1034386E-01  -.1393536E-01  -.1555779E-01  -.1494111E-01  -.1241707E-01
  -.8877713E-02  -.5490015E-02  -.2694313E-02  -.2292684E-03   .2116341E-02
   .4321092E-02   .5280122E-02   .4050166E-02   .1086502E-02  -.2346091E-02
  -.4941037E-02  -.5904678E-02  -.4870230E-02  -.2160614E-02   .1281911E-02
   .4382205E-02   .6340741E-02   .6219749E-02   .3627733E-02  -.6569010E-03
  -.5300192E-02  -.8841632E-02  -.1031075E-01  -.9699653E-02  -.7858590E-02
  -.5891884E-02  -.4662391E-02  -.4334286E-02  -.4568396E-02  -.4951789E-02
  -.5209741E-02  -.5214851E-02  -.4924546E-02  -.4329956E-02  -.3498983E-02
  -.2544101E-02  -.1586338E-02  -.6994990E-03   .8909239E-04   .8027872E-03
   .1480180E-02   .2158549E-02   .2785122E-02   .3108925E-02   .2940210E-02
   .2393321E-02   .1725758E-02   .1203531E-02   .9723794E-03   .1259218E-02
   .2206020E-02   .3647985E-02   .5203717E-02   .6512242E-02   .7382764E-02
   .7914239E-02   .8340959E-02   .8856239E-02   .9550000E-02   .1042630E-01
   .1142730E-01   .1248102E-01   .1348757E-01   .1429643E-01   .1480971E-01
   .1503543E-01   .1453498E-01   .1291252E-01   .1033971E-01   .6427048E-02
   .6472782E-03  -.6597466E-02  -.1423074E-01  -.2117860E-01  -.2688992E-01
  -.3126848E-01  -.3311573E-01  -.3051775E-01  -.2356694E-01  -.1453504E-01
  -.6328091E-02  -.8701029E-03   .1406758E-02   .1303513E-02  -.1192880E-02
  -.5940355E-02  -.1091608E-01  -.1300076E-01  -.1034712E-01  -.3571607E-02
   .5171534E-02   .1346318E-01   .1967662E-01   .2332599E-01   .2493304E-01
   .2553001E-01   .2609453E-01   .2647937E-01   .2512081E-01   .2109628E-01
   .1519844E-01   .9038148E-02   .4033211E-02   .7567714E-03  -.1064031E-02
  -.2244159E-02  -.3664757E-02  -.5952739E-02  -.9303312E-02  -.1354429E-01
  -.1819928E-01  -.2213998E-01  -.2357087E-01  -.2172816E-01  -.1756254E-01
  -.1283656E-01  -.9095698E-02  -.7061084E-02  -.6570137E-02  -.6894396E-02
  -.7187831E-02  -.7073556E-02  -.6589414E-02  -.5812478E-02  -.4812794E-02
  -.4011252E-02  -.3929494E-02  -.4644536E-02  -.5854358E-02  -.7121858E-02
  -.8115765E-02  -.8491735E-02  -.7838696E-02  -.6126340E-02  -.3874589E-02
  -.1732213E-02   .6002878E-04   .1927352E-02   .4278362E-02   .7113400E-02
   .1014899E-01   .1302798E-01   .1496502E-01   .1506189E-01   .1329454E-01
   .1057079E-01   .8065884E-02   .6638253E-02   .6751829E-02   .8365969E-02
   .1084379E-01   .1332217E-01   .1507860E-01   .1577466E-01   .1516643E-01
   .1333550E-01   .1083711E-01   .8340769E-02   .5895184E-02   .2974674E-02
  -.6717254E-03  -.4735727E-02  -.8410717E-02  -.1022280E-01  -.9341618E-02
  -.6452523E-02  -.2939990E-02  -.1319987E-03   .1234049E-02   .1096745E-02
  -.2639108E-03  -.2635078E-02  -.5580426E-02  -.8387858E-02  -.1019701E-01
  -.1037936E-01  -.8996046E-02  -.6774467E-02  -.4982601E-02  -.4744227E-02
  -.6274456E-02  -.9026214E-02  -.1209123E-01  -.1472796E-01  -.1652344E-01
  -.1737510E-01  -.1616316E-01  -.1202137E-01  -.5735677E-02   .1049249E-02
   .6770281E-02   .1067300E-01   .1283470E-01   .1362734E-01   .1317610E-01
   .1187522E-01   .1050469E-01   .9428539E-02   .8396497E-02   .7194438E-02
   .5875622E-02   .4605230E-02   .3469623E-02   .2422608E-02   .1322294E-02
   .5219989E-04  -.1113786E-02  -.1633251E-02  -.1338420E-02  -.5669456E-03
   .1289992E-04  -.5250381E-03  -.2655307E-02  -.5972496E-02  -.9615871E-02
  -.1269575E-01  -.1424654E-01  -.1349118E-01  -.1064485E-01  -.6782527E-02
  -.3192446E-02  -.7033593E-03   .8115492E-03   .2115250E-02   .3768154E-02
   .5989879E-02   .8642575E-02   .1139527E-01   .1270572E-01   .1128760E-01
   .7556957E-02   .2958281E-02  -.9831141E-03  -.3401629E-02  -.4254796E-02
  -.4125421E-02  -.3828043E-02  -.4046077E-02  -.5140178E-02  -.7090209E-02
  -.9508926E-02  -.1079606E-01  -.9245382E-02  -.4796311E-02   .1241548E-02
   .7140241E-02   .1170616E-01   .1458127E-01   .1619572E-01   .1728711E-01
   .1815716E-01   .1754648E-01   .1441200E-01   .9397630E-02   .4027156E-02
  -.2624563E-03  -.2841721E-02  -.3911035E-02  -.4262902E-02  -.4767928E-02
  -.5987601E-02  -.7078836E-02  -.6938404E-02  -.5548485E-02  -.3612513E-02
  -.1990608E-02  -.1173411E-02  -.1183957E-02  -.1632181E-02  -.1980332E-02
  -.1795327E-02  -.9355848E-03   .5042440E-03   .2266555E-02   .4089754E-02
   .5764394E-02   .7204864E-02   .8379825E-02   .9343774E-02   .1018797E-01
   .1103284E-01   .1193492E-01   .1284705E-01   .1294610E-01   .1130823E-01
   .7968011E-02   .3781747E-02  -.2013087E-03  -.3270636E-02  -.5273585E-02
  -.6501778E-02  -.7397504E-02  -.7588149E-02  -.6407031E-02  -.3995734E-02
  -.1162556E-02   .1180337E-02   .2515504E-02   .2851227E-02   .2595509E-02
   .2253191E-02   .1797868E-02   .1016002E-02   .5181838E-04  -.7855472E-03
  -.1213117E-02  -.1143918E-02  -.4861842E-03   .8283149E-03   .2612705E-02
   .4450035E-02   .5936602E-02   .6862982E-02   .7253991E-02   .7243217E-02
   .6369853E-02   .4034871E-02   .4363023E-03  -.3618999E-02  -.7227279E-02
  -.9866668E-02  -.1146738E-01  -.1202177E-01  -.1160633E-01  -.1071091E-01
  -.9954875E-02  -.9653291E-02  -.9526639E-02  -.9235908E-02  -.8677884E-02
  -.7951025E-02  -.7097559E-02  -.5922819E-02  -.4214688E-02  -.2061143E-02
   .3725727E-03   .2919533E-02   .5502477E-02   .7984996E-02   .1015291E-01
   .1013269E-01   .6364637E-02   .8427661E-05  -.5924391E-02  -.8921414E-02
  -.8485743E-02  -.5698977E-02  -.2260992E-02   .6347596E-03   .2410775E-02
   .2954459E-02   .2524616E-02   .1785017E-02   .1456492E-02   .1910302E-02
   .3094136E-02   .4498494E-02   .5297726E-02   .5034322E-02   .3911555E-02
   .2493152E-02   .1328678E-02   .6565791E-03   .3844449E-03   .2766611E-03
   .1138816E-03  -.2422877E-03  -.8322032E-03  -.1622580E-02  -.2538115E-02
  -.3528886E-02  -.4632594E-02  -.5889570E-02  -.7234632E-02  -.8570966E-02
  -.9800909E-02  -.1089978E-01  -.1186689E-01  -.1263274E-01  -.1194681E-01
  -.8679689E-02  -.3293759E-02   .2848025E-02   .8296935E-02   .1228227E-01
   .1471960E-01   .1566193E-01   .1398010E-01   .9086850E-02   .2224026E-02
  -.4568952E-02  -.9613306E-02  -.1230293E-01  -.1307750E-01  -.1293492E-01
  -.1226389E-01  -.1028659E-01  -.6603511E-02  -.2022839E-02   .2186506E-02
   .5063852E-02   .6398776E-02   .6637067E-02   .6580809E-02   .6942112E-02
   .7811820E-02   .7955566E-02   .6272471E-02   .3016619E-02  -.7804862E-03
  -.4022635E-02  -.6154233E-02  -.7204802E-02  -.7682654E-02  -.8176343E-02
  -.9028471E-02  -.8854813E-02  -.6176743E-02  -.1280555E-02   .4465894E-02
   .9542241E-02   .1311148E-01   .1513981E-01   .1624664E-01   .1713686E-01
   .1742184E-01   .1514611E-01   .9337382E-02   .1254251E-02  -.6115551E-02
  -.9750425E-02  -.8746846E-02  -.4496901E-02   .5435482E-03   .4431758E-02
   .6263614E-02   .6003235E-02   .4269801E-02   .1965259E-02  -.5856955E-04
  -.1258134E-02  -.1468459E-02  -.8801963E-03  -.7141608E-04   .9179639E-04
  -.8715464E-03  -.2774275E-02  -.5026920E-02  -.6799038E-02  -.7209646E-02
  -.5999664E-02  -.3712407E-02  -.1148402E-02   .1076956E-02   .2625922E-02
   .3287539E-02   .2885320E-02   .1577194E-02  -.8768799E-04  -.1491481E-02
  -.2221044E-02  -.2198268E-02  -.1618850E-02  -.8050774E-03   .1393498E-03
   .1204243E-02   .2265003E-02   .3193791E-02   .3998882E-02   .4766378E-02
   .5535773E-02   .6304142E-02   .6911242E-02   .7177536E-02   .7037440E-02
   .6356326E-02   .5134328E-02   .3657401E-02   .2228404E-02   .9757110E-03
  -.1142864E-03  -.1090873E-02  -.2029756E-02  -.3002014E-02  -.4054010E-02
  -.5058133E-02  -.5691082E-02  -.5782333E-02  -.5497051E-02  -.5146260E-02
  -.4990515E-02  -.5086619E-02  -.5351203E-02  -.5653268E-02  -.5883029E-02
  -.5971815E-02  -.5902178E-02  -.5639442E-02  -.5028108E-02  -.3980242E-02
  -.2640826E-02  -.1232934E-02   .2185765E-03   .1846414E-02   .3625315E-02
   .5240353E-02   .6217488E-02   .6373943E-02   .5318976E-02   .2922257E-02
  -.2819422E-03  -.3832210E-02  -.8272497E-02  -.1280829E-01  -.1387321E-01
  -.9143662E-02   .3142257E-03   .1139352E-01   .2096254E-01   .2724329E-01
   .3015855E-01   .3078235E-01   .2967916E-01   .2596130E-01   .1942696E-01
   .1161302E-01   .4614914E-02  -.8802876E-04  -.2207942E-02  -.2210650E-02
  -.7308488E-03   .1312936E-02   .2802579E-02   .3246969E-02   .2914378E-02
   .2250537E-02   .1531964E-02   .9029744E-03   .4409017E-03   .2237323E-03
   .4126127E-03   .1199175E-02   .2578769E-02   .4342721E-02   .6196099E-02
   .7905086E-02   .9354601E-02   .1052183E-01   .1109542E-01   .1034627E-01
   .8007825E-02   .4673500E-02   .1260409E-02  -.1705120E-02  -.4161918E-02
  -.6197410E-02  -.8015495E-02  -.9819658E-02  -.1180480E-01  -.1406221E-01
  -.1659107E-01  -.1906997E-01  -.2104110E-01  -.2228635E-01  -.2273867E-01
  -.2216516E-01  -.2064504E-01  -.1867353E-01  -.1681465E-01  -.1485811E-01
  -.1233552E-01  -.9212422E-02  -.5786924E-02  -.2407786E-02   .6963882E-03
   .3407965E-02   .4739890E-02   .3872711E-02   .1320688E-02  -.1688294E-02
  -.3943649E-02  -.4850528E-02  -.4480891E-02  -.3401858E-02  -.2265935E-02
  -.1219412E-02   .1026713E-03   .1844813E-02   .3769858E-02   .5472003E-02
   .6587553E-02   .6856075E-02   .6376579E-02   .5569554E-02   .4946398E-02
   .4842870E-02   .5312557E-02   .5813384E-02   .5732864E-02   .4933068E-02
   .3638110E-02   .2209138E-02   .9406105E-03  -.3684817E-04  -.7572171E-03
  -.1355639E-02  -.1984514E-02  -.2753688E-02  -.3698363E-02  -.4789368E-02
  -.5919569E-02  -.6657443E-02  -.6195154E-02  -.4193500E-02  -.1139408E-02
   .2101340E-02   .4786138E-02   .6589430E-02   .7621130E-02   .8262569E-02
   .8951005E-02   .1000267E-01   .1154041E-01   .1346798E-01   .1532141E-01
   .1588924E-01   .1434470E-01   .1110594E-01   .7265721E-02   .3927076E-02
   .1671491E-02   .5063865E-03  -.1458098E-04  -.4496228E-03  -.1209440E-02
  -.1781811E-02  -.1491098E-02  -.3771410E-03   .1050966E-02   .2209513E-02
   .2778232E-02   .2766022E-02   .2434740E-02   .2093464E-02   .1725676E-02
   .1020101E-02  -.1202854E-03  -.1482740E-02  -.2729108E-02  -.3605246E-02
  -.3803484E-02  -.3159529E-02  -.1906433E-02  -.5292598E-03   .5121402E-03
   .9766633E-03   .8890910E-03   .4608243E-03  -.2839873E-04  -.3535840E-03
  -.4327060E-03  -.6672109E-03  -.1965152E-02  -.4798018E-02  -.8718477E-02
  -.1279244E-01  -.1551447E-01  -.1588525E-01  -.1423898E-01  -.1169016E-01
  -.9367800E-02  -.7968256E-02  -.7706875E-02  -.8346016E-02  -.9410954E-02
  -.1035249E-01  -.1073390E-01  -.1037589E-01  -.9388220E-02  -.7908019E-02
  -.6032608E-02  -.3933887E-02  -.1870675E-02  -.5059663E-04   .1434450E-02
   .2640415E-02   .3693837E-02   .4694831E-02   .5190085E-02   .4593878E-02
   .2948236E-02   .8165318E-03  -.1105262E-02  -.2338800E-02  -.2368288E-02
  -.1035233E-02   .1142942E-02   .3364926E-02   .4952755E-02   .5613330E-02
   .5391248E-02   .4065504E-02   .1523002E-02  -.1700038E-02  -.4844875E-02
  -.7230619E-02  -.8276202E-02  -.6826772E-02  -.2434911E-02   .3832644E-02
   .1022901E-01   .1529643E-01   .1838419E-01   .1934181E-01   .1750771E-01
   .1282265E-01   .6689932E-02   .9801980E-03  -.2886205E-02  -.4520580E-02
  -.4426716E-02  -.3645352E-02  -.3192439E-02  -.3768660E-02  -.5544683E-02
  -.8206851E-02  -.1023244E-01  -.1020322E-01  -.8116443E-02  -.4933885E-02
  -.1852951E-02   .3315354E-03   .1418136E-02   .1699509E-02   .1528678E-02
   .7598218E-03  -.7432019E-03  -.2592039E-02  -.4163096E-02  -.4810901E-02
  -.4312300E-02  -.2967561E-02  -.1274589E-02   .2996021E-03   .1386482E-02
   .1849252E-02   .1763354E-02   .1373387E-02   .9554162E-03   .7338079E-03
   .7999137E-03   .1141782E-02   .1664920E-02   .2281658E-02   .2905933E-02
   .3479299E-02   .3960662E-02   .4354187E-02   .4677854E-02   .4974877E-02
   .5279999E-02   .5700759E-02   .6326840E-02   .7149773E-02   .8059386E-02
   .8939320E-02   .9694099E-02   .1025420E-01   .1052135E-01   .1051410E-01
   .1035245E-01   .1013382E-01   .9156420E-02   .6742750E-02   .3339942E-02
  -.7707032E-04  -.2751569E-02  -.4459164E-02  -.5432549E-02  -.6141732E-02
  -.7034040E-02  -.8353919E-02  -.9840586E-02  -.1101257E-01  -.1166498E-01
  -.1168882E-01  -.1100966E-01  -.9770727E-02  -.8166175E-02  -.6165347E-02
  -.3793013E-02  -.1263520E-02   .1159341E-02   .3282248E-02   .4659414E-02
   .4755561E-02   .3620844E-02   .1922340E-02   .4763909E-03  -.1546717E-03
   .2592775E-03   .1593096E-02   .3381379E-02   .5069776E-02   .6230206E-02
   .6711409E-02   .6589462E-02   .5943351E-02   .4408893E-02   .1778058E-02
  -.1540395E-02  -.4857155E-02  -.7594181E-02  -.9518536E-02  -.1065100E-01
  -.1094871E-01  -.1052739E-01  -.9823264E-02  -.9069649E-02  -.8287305E-02
  -.7548656E-02  -.6953680E-02  -.6416591E-02  -.5755555E-02  -.4897795E-02
  -.3847985E-02  -.2668916E-02  -.1410926E-02  -.1252867E-03   .1150835E-02
   .2191982E-02   .2768251E-02   .2896802E-02   .2819106E-02   .2841610E-02
   .3502692E-02   .5348944E-02   .8382285E-02   .1199785E-01   .1522887E-01
   .1673160E-01   .1582181E-01   .1307652E-01   .9755036E-02   .7185911E-02
   .6219110E-02   .6897700E-02   .8606678E-02   .1048375E-01   .1182971E-01
   .1229541E-01   .1186203E-01   .1014665E-01   .6924309E-02   .2738543E-02
  -.1524235E-02  -.5097401E-02  -.7707434E-02  -.9491088E-02  -.1040260E-01
  -.1033596E-01  -.9633708E-02  -.8900559E-02  -.8670244E-02  -.8850626E-02
  -.8975447E-02  -.8744516E-02  -.8146045E-02  -.7332398E-02  -.6468584E-02
  -.5645406E-02  -.4867961E-02  -.4088253E-02  -.3246372E-02  -.2320410E-02
  -.1454676E-02  -.1197132E-02  -.1936623E-02  -.3456011E-02  -.5170922E-02
  -.6443373E-02  -.6947067E-02  -.6678221E-02  -.5673018E-02  -.4111582E-02
  -.2412342E-02  -.8256492E-03   .7526929E-03   .2481205E-02   .4310603E-02
   .6066204E-02   .7102000E-02   .6811033E-02   .5317943E-02   .3321625E-02
   .1621867E-02   .7247723E-03   .7094543E-03   .1314276E-02   .2226271E-02
   .3222474E-02   .4099885E-02   .4681179E-02   .4884486E-02   .4750969E-02
   .4402065E-02   .3862327E-02   .3057154E-02   .2023661E-02   .9380229E-03
   .7615705E-06  -.6716992E-03  -.1066253E-02  -.1132464E-02  -.7907074E-03
  -.1349421E-03   .4887372E-03   .6046823E-03  -.2286112E-04  -.1243560E-02
  -.2689574E-02  -.3985507E-02  -.4889328E-02  -.5188235E-02  -.4841559E-02
  -.4095278E-02  -.3302460E-02  -.2755700E-02  -.2546480E-02  -.2512635E-02
  -.2419596E-02  -.2154968E-02  -.1721592E-02  -.1296646E-02  -.1088442E-02
  -.1172543E-02  -.1711739E-02  -.2936001E-02  -.4783692E-02  -.6889221E-02
  -.8781256E-02  -.9696026E-02  -.8864007E-02  -.6322326E-02  -.2907392E-02
   .3111594E-03   .2579903E-02   .3684661E-02   .3897264E-02   .3671159E-02
   .3289290E-02   .2922628E-02   .2797120E-02   .3049667E-02   .3558230E-02
   .3652233E-02   .2783879E-02   .9947703E-03  -.1466064E-02  -.4544898E-02
  -.8100498E-02  -.1168063E-01  -.1388817E-01  -.1301004E-01  -.8824494E-02
  -.2764248E-02   .3167337E-02   .7465180E-02   .9630410E-02   .1009685E-01
   .9746839E-02   .8820782E-02   .6879092E-02   .3946842E-02   .7266633E-03
  -.1914886E-02  -.3470948E-02  -.3955678E-02  -.3778805E-02  -.3170171E-02
  -.2301522E-02  -.1540365E-02  -.1241105E-02  -.1568703E-02  -.2212733E-02
  -.2706460E-02  -.2804824E-02  -.2365842E-02  -.1367319E-02   .1801306E-04
   .1511484E-02   .2796751E-02   .3598292E-02   .3869289E-02   .3821781E-02
   .3761069E-02   .3926840E-02   .4361213E-02   .4938692E-02   .5511631E-02
   .6000429E-02   .6383181E-02   .6674321E-02   .6895588E-02   .7071981E-02
   .7222858E-02   .7364547E-02   .7502857E-02   .7662168E-02   .7870466E-02
   .8134349E-02   .8422571E-02   .8684860E-02   .8832474E-02   .8797305E-02
   .8342514E-02   .7152557E-02   .5234970E-02   .2946173E-02   .5614658E-03
  -.1813895E-02  -.4093154E-02  -.6184135E-02  -.7861409E-02  -.8728182E-02
  -.8696364E-02  -.8151544E-02  -.7605208E-02  -.6916037E-02  -.5569971E-02
  -.3494197E-02  -.1035209E-02   .1321954E-02   .3277375E-02   .4769592E-02
   .5836914E-02   .6221403E-02   .5811608E-02   .4965215E-02   .4212914E-02
   .3815202E-02   .3639356E-02   .3471594E-02   .3182544E-02   .2628481E-02
   .1413500E-02  -.7031232E-03  -.3482790E-02  -.6474090E-02  -.9242539E-02
  -.1150194E-01  -.1244441E-01  -.1132693E-01  -.8457667E-02  -.4916289E-02
  -.1879559E-02  -.3841472E-04   .5397466E-03   .2985689E-03  -.1293130E-03
  -.2148782E-03  -.3582500E-04  -.1268715E-03  -.7846216E-03  -.1842816E-02
  -.2931622E-02  -.3730816E-02  -.4138652E-02  -.4229477E-02  -.4060686E-02
  -.3264993E-02  -.1595040E-02   .6523203E-03   .2907431E-02   .4688086E-02
   .5766696E-02   .5929258E-02   .4306799E-02   .4541157E-03  -.4826003E-02
  -.1018057E-01  -.1445399E-01  -.1717303E-01  -.1846508E-01  -.1804920E-01
  -.1526017E-01  -.1041585E-01  -.4863776E-02  -.1354545E-03   .2852455E-02
   .4007010E-02   .3678599E-02   .2161940E-02   .1144431E-04  -.1933170E-02
  -.2942634E-02  -.2720128E-02  -.1436543E-02   .4064834E-03   .2230077E-02
   .3587055E-02   .4333494E-02   .4690562E-02   .4991106E-02   .5405479E-02
   .5960637E-02   .6550339E-02   .6722660E-02   .5852714E-02   .3846257E-02
   .1184686E-02  -.1414367E-02  -.3320598E-02  -.4108059E-02  -.3823870E-02
  -.2770298E-02  -.1366451E-02  -.7530520E-04   .7377114E-03   .1010057E-02
   .9804260E-03   .9811446E-03   .1226742E-02   .1877645E-02   .2934619E-02
   .4272689E-02   .5669642E-02   .6894315E-02   .7040594E-02   .5399139E-02
   .2306357E-02  -.1276217E-02  -.4339771E-02  -.5978332E-02  -.5858241E-02
  -.4479136E-02  -.2565769E-02  -.7419094E-03   .5223059E-03   .1025452E-02
   .8850383E-03   .5787467E-03   .5787262E-03   .1008223E-02   .7818509E-03
  -.1225263E-02  -.4880163E-02  -.9212514E-02  -.1281033E-01  -.1454704E-01
  -.1420664E-01  -.1208294E-01  -.8853273E-02  -.5601968E-02  -.3156511E-02
  -.1845478E-02  -.1507368E-02  -.1713117E-02  -.1942040E-02  -.1820190E-02
  -.1349459E-02  -.9789361E-03  -.1038947E-02  -.1484272E-02  -.2034264E-02
  -.2421718E-02  -.2498672E-02  -.2176221E-02  -.1315381E-02   .1953704E-04
   .1524312E-02   .2837557E-02   .3737643E-02   .4191947E-02   .4344734E-02
   .4401267E-02   .4566897E-02   .4948459E-02   .5557094E-02   .6293840E-02
   .7009811E-02   .7058716E-02   .5907924E-02   .3739389E-02   .1173958E-02
  -.1109421E-02  -.2400901E-02  -.2361243E-02  -.1329745E-02   .9683262E-04
   .1359616E-02   .2096519E-02   .2189571E-02   .1767829E-02   .1100912E-02
   .5367465E-03   .3983024E-03   .8224105E-03   .1702093E-02   .2844311E-02
   .4038162E-02   .5118583E-02   .5993107E-02   .6629431E-02   .6698724E-02
   .5934769E-02   .4529369E-02   .2719567E-02   .7079402E-03  -.1255734E-02
  -.2947073E-02  -.4283111E-02  -.5326255E-02  -.6204902E-02  -.6656643E-02
  -.6312261E-02  -.5263874E-02  -.3970556E-02  -.2947630E-02  -.2486012E-02
  -.2590042E-02  -.3037595E-02  -.3526015E-02  -.3789359E-02  -.3693232E-02
  -.3239139E-02  -.2538893E-02  -.1755099E-02  -.1038313E-02  -.4635731E-03
  -.4012871E-04   .2781825E-03   .5478050E-03   .8168523E-03   .1099839E-02
   .1409030E-02   .1742530E-02   .2090474E-02   .2376804E-02   .2539342E-02
   .2582529E-02   .2568072E-02   .2547180E-02   .2461096E-02   .1933307E-02
   .5945025E-03  -.1642798E-02  -.4485078E-02  -.7300772E-02  -.9220016E-02
  -.9730139E-02  -.8823569E-02  -.6788302E-02  -.4271731E-02  -.2007141E-02
  -.3287037E-03   .8727191E-03   .1831247E-02   .2779850E-02   .3864051E-02
   .5137442E-02   .6280556E-02   .6951058E-02   .7041664E-02   .6513372E-02
   .5536291E-02   .4475785E-02   .3674507E-02   .3305274E-02   .3475690E-02
   .4232320E-02   .5386004E-02   .6570347E-02   .7410400E-02   .7434550E-02
   .6044183E-02   .3157162E-02  -.5881450E-03  -.4293636E-02  -.7261874E-02
  -.9198575E-02  -.9821874E-02  -.8597212E-02  -.5571361E-02  -.1681359E-02
   .1894729E-02   .4302668E-02   .5146697E-02   .4476821E-02   .2885235E-02
   .1211909E-02   .9508700E-04  -.4758931E-03  -.7988111E-03  -.1070283E-02
  -.1358733E-02  -.1641970E-02  -.1525818E-02  -.6759939E-03   .7421073E-03
   .2282713E-02   .3499936E-02   .4175069E-02   .4336410E-02   .4129277E-02
   .3738189E-02   .3383665E-02   .3243727E-02   .3400920E-02   .3823798E-02
   .4388593E-02   .4948734E-02   .5403355E-02   .5715012E-02   .5879852E-02
   .5909668E-02   .5824065E-02   .5498917E-02   .4303798E-02   .1847262E-02
  -.1170588E-02  -.3262993E-02  -.3427471E-02  -.1845457E-02   .5609362E-03
   .2721927E-02   .3898608E-02   .3880622E-02   .2974439E-02   .1719999E-02
   .6502764E-03   .8225692E-04   .6770918E-04   .4370687E-03   .9701238E-03
   .1466210E-02   .1769139E-02   .1652536E-02   .1025335E-02   .2625762E-04
  -.1093572E-02  -.2178531E-02  -.3161736E-02  -.4034860E-02  -.4806305E-02
  -.5522583E-02  -.6230859E-02  -.7071123E-02  -.8148461E-02  -.9378983E-02
  -.9792531E-02  -.8488942E-02  -.5656642E-02  -.2171521E-02   .9046811E-03
   .2860157E-02   .3581560E-02   .3502289E-02   .3253590E-02   .3359455E-02
   .3788929E-02   .4084290E-02   .3944794E-02   .3446208E-02   .2876340E-02
   .2742477E-02   .3378189E-02   .4645250E-02   .6128671E-02   .7386811E-02
   .8161376E-02   .8420916E-02   .8325502E-02   .8092093E-02   .7790248E-02
   .7030929E-02   .5498695E-02   .3386332E-02   .1155425E-02  -.7517289E-03
  -.2133150E-02  -.3036355E-02  -.3639708E-02  -.3673539E-02  -.2736221E-02
  -.9790120E-03   .1031870E-02   .2680734E-02   .3641580E-02   .3927039E-02
   .3832434E-02   .3710783E-02   .3794233E-02   .3469805E-02   .2050244E-02
  -.3477685E-03  -.3108113E-02  -.5545853E-02  -.7254071E-02  -.7905498E-02
  -.7488778E-02  -.6457909E-02  -.5108846E-02  -.3553525E-02  -.2013903E-02
  -.7616857E-03   .4401636E-04   .4317280E-03   .5584586E-03   .3063254E-03
  -.6565293E-03  -.2293938E-02  -.3853706E-02  -.4508150E-02  -.4022210E-02
  -.2729070E-02  -.1450393E-02  -.1214888E-02  -.2515345E-02  -.4879209E-02
  -.6979912E-02  -.7682252E-02  -.6845979E-02  -.5053536E-02  -.3149848E-02
  -.1768727E-02  -.1178497E-02  -.1276022E-02  -.1772509E-02  -.2326645E-02
  -.2923111E-02  -.3819704E-02  -.5112522E-02  -.6608076E-02  -.8011507E-02
  -.9057847E-02  -.9201182E-02  -.7984591E-02  -.5664638E-02  -.2965015E-02
  -.6674467E-03   .7947099E-03   .1385394E-02   .1421937E-02   .1321146E-02
   .1473006E-02   .2060347E-02   .3060934E-02   .3733656E-02   .3352449E-02
   .1920591E-02  -.3225602E-04  -.1863646E-02  -.2989832E-02  -.3153576E-02
  -.2584364E-02  -.2024982E-02  -.2288641E-02  -.3622560E-02  -.4706270E-02
  -.4024159E-02  -.1388094E-02   .2399475E-02   .6194398E-02   .9140365E-02
   .1045558E-01   .9307853E-02   .5761228E-02   .1335271E-02  -.2083582E-02
  -.3393576E-02  -.2444506E-02   .2275116E-03   .3593714E-02   .6568840E-02
   .8426506E-02   .8991085E-02   .8533300E-02   .7536021E-02   .6077303E-02
   .3941828E-02   .1385948E-02  -.9443300E-03  -.2231860E-02  -.1981488E-02
  -.4509921E-03   .1600687E-02   .3347743E-02   .4226623E-02   .3728457E-02
   .1651124E-02  -.1536768E-02  -.4993343E-02  -.7916718E-02  -.9829733E-02
  -.1007339E-01  -.8380952E-02  -.5420729E-02  -.2270824E-02   .1198088E-03
   .1327683E-02   .1462566E-02   .1029140E-02   .8587755E-03   .1757094E-02
   .3566794E-02   .5311906E-02   .6221329E-02   .6202450E-02   .5645379E-02
   .5079910E-02   .4883585E-02   .5173558E-02   .5824765E-02   .6521939E-02
   .6908201E-02   .6814132E-02   .6295635E-02   .5553831E-02   .4812553E-02
   .4240093E-02   .3962127E-02   .4113883E-02   .4674740E-02   .5426674E-02
   .6042929E-02   .6298801E-02   .6168463E-02   .5752476E-02   .4828190E-02
   .2898442E-02  -.5210938E-03  -.5014347E-02  -.8579754E-02  -.9506351E-02
  -.7742869E-02  -.4477006E-02  -.1255906E-02   .7915752E-03   .1266900E-02
   .4500582E-03  -.1000744E-02  -.2382035E-02  -.3233658E-02  -.3409123E-02
  -.3057679E-02  -.2535144E-02  -.2156526E-02  -.2048714E-02  -.2180704E-02
  -.2443479E-02  -.2725330E-02  -.2947591E-02  -.2994473E-02  -.2742045E-02
  -.2204181E-02  -.1532263E-02  -.9115133E-03  -.4644123E-03  -.2153904E-03
  -.1100718E-03  -.7233294E-04  -.8152602E-04  -.1459781E-03  -.3816085E-03
  -.9719200E-03  -.1922779E-02  -.3046090E-02  -.4099400E-02  -.4903508E-02
  -.5206268E-02  -.4758589E-02  -.3636602E-02  -.2187115E-02  -.7642247E-03
   .3859135E-03   .1152024E-02   .1578335E-02   .1812664E-02   .2046747E-02
   .2428349E-02   .3039763E-02   .3865381E-02   .4789395E-02   .5186769E-02
   .4499793E-02   .2855390E-02   .7992109E-03  -.1063615E-02  -.2381551E-02
  -.3102362E-02  -.3328385E-02  -.3234244E-02  -.3079106E-02  -.2939763E-02
  -.2710233E-02  -.2343617E-02  -.1933708E-02  -.1589928E-02  -.1232162E-02
  -.5291505E-03   .7259642E-03   .2426895E-02   .4265461E-02   .5679707E-02
   .6185742E-02   .5766128E-02   .4657808E-02   .3270512E-02   .2051735E-02
   .1241401E-02   .6395922E-03  -.8541490E-04  -.1075235E-02  -.2270021E-02
  -.3236609E-02  -.3394866E-02  -.2610935E-02  -.1268004E-02   .5107909E-04
   .8965540E-03   .1079450E-02   .6926270E-03   .2394995E-04  -.5892917E-03
  -.9095703E-03  -.9099436E-03  -.7872700E-03  -.7407155E-03  -.8436000E-03
  -.1058782E-02  -.1316646E-02  -.1563862E-02  -.1866813E-02  -.2327113E-02
  -.2924778E-02  -.3447507E-02  -.3701634E-02  -.3678957E-02  -.3506149E-02
  -.3344358E-02  -.3283615E-02  -.3305347E-02  -.3351415E-02  -.3381016E-02
  -.3376743E-02  -.3327555E-02  -.3228726E-02  -.3088348E-02  -.2924105E-02
  -.2752903E-02  -.2588304E-02  -.2449790E-02  -.2354264E-02  -.2294947E-02
  -.2250776E-02  -.2196288E-02  -.2118970E-02  -.2024211E-02  -.1926412E-02
  -.1830995E-02  -.1729741E-02  -.1473862E-02  -.7633384E-03   .5298486E-03
   .2227039E-02   .4199823E-02   .6347737E-02   .8480294E-02   .1039396E-01
   .1178598E-01   .1226089E-01   .1175781E-01   .1062283E-01   .9127567E-02
   .7509651E-02   .6064686E-02   .5004721E-02   .4370184E-02   .4015143E-02
   .3700567E-02   .3201353E-02   .2404499E-02   .1410665E-02   .5326379E-03
  -.1022131E-04  -.2447578E-03  -.3460340E-03  -.4964531E-03  -.7555344E-03
  -.1076005E-02  -.1376150E-02  -.1508116E-02  -.1349780E-02  -.9187518E-03
  -.3381400E-03   .2429479E-03   .7252896E-03   .1076368E-02   .1305432E-02
   .1236703E-02   .7171733E-03  -.1344834E-03  -.1051125E-02  -.1680084E-02
  -.1689784E-02  -.1010561E-02   .9220832E-04   .1231028E-02   .2081774E-02
   .2511029E-02   .2551686E-02   .2249363E-02   .1532476E-02   .4440940E-03
  -.7818734E-03  -.1862884E-02  -.2620708E-02  -.3039029E-02  -.3246044E-02
  -.3409809E-02  -.3637257E-02  -.3851099E-02  -.3954583E-02  -.3964366E-02
  -.3971161E-02  -.4058998E-02  -.4253798E-02  -.4509821E-02  -.4760523E-02
  -.4953694E-02  -.5070160E-02  -.5111454E-02  -.5100442E-02  -.5058842E-02
  -.5006913E-02  -.4950179E-02  -.4898531E-02  -.4853676E-02  -.4820445E-02
  -.4782990E-02  -.4705133E-02  -.4550916E-02  -.4340507E-02  -.4102595E-02
  -.3847377E-02  -.3243345E-02  -.1982826E-02  -.1609369E-03   .1869287E-02
   .3710747E-02   .4889593E-02   .5102988E-02   .4521026E-02   .3630115E-02
   .2944054E-02   .2765479E-02   .3118257E-02   .3816425E-02   .4600611E-02
   .5249084E-02   .5638250E-02   .5756796E-02   .5671445E-02   .5470373E-02
   .5036849E-02   .4241350E-02   .3171120E-02   .2006374E-02   .9207845E-03
   .1814530E-04  -.6795549E-03  -.1180734E-02  -.1317114E-02  -.6935113E-03
   .8080637E-03   .2818767E-02   .4788779E-02   .6290785E-02   .7177683E-02
   .7565514E-02   .7701811E-02   .7748108E-02   .7510247E-02   .6801702E-02
   .5792062E-02   .4804976E-02   .4099217E-02   .3455260E-02   .2504914E-02
   .1145148E-02  -.5237251E-03  -.2376522E-02  -.4295313E-02  -.5999211E-02
  -.7054001E-02  -.7282636E-02  -.6890721E-02  -.6091643E-02  -.5120026E-02
  -.4271656E-02  -.3758256E-02  -.3604380E-02  -.3505858E-02  -.2872363E-02
  -.1347136E-02   .9062884E-03   .3196833E-02   .4517230E-02   .4365021E-02
   .3064755E-02   .1377725E-02  -.2391097E-04  -.8182119E-03  -.9913636E-03
  -.7564251E-03  -.4064467E-03  -.1874999E-03  -.2436277E-04   .2602391E-03
   .6653348E-03   .1084153E-02   .1396764E-02   .1552009E-02   .1572880E-02
   .1536369E-02   .1528098E-02   .1613967E-02   .1807530E-02   .1992580E-02
   .1768176E-02   .8476816E-03  -.6254544E-03  -.2256483E-02  -.3450715E-02
  -.3690572E-02  -.2926336E-02  -.1583211E-02  -.2381220E-03   .6571041E-03
   .9392214E-03   .6967961E-03   .1368027E-03  -.9987895E-03  -.2980588E-02
  -.5521204E-02  -.7914709E-02  -.9047751E-02  -.8304975E-02  -.6077502E-02
  -.3325246E-02  -.1007339E-02   .3248577E-03   .6194791E-03   .2071397E-03
  -.4377105E-03  -.9586993E-03  -.1391984E-02  -.1884583E-02  -.2423456E-02
  -.2897881E-02  -.3202028E-02  -.3258541E-02  -.3077064E-02  -.2781427E-02
  -.2487343E-02  -.2157950E-02  -.1727472E-02  -.1239541E-02  -.7871176E-03
  -.4577007E-03  -.2711356E-03  -.1836631E-03  -.1132408E-03   .1372558E-04
   .2423930E-03   .5746626E-03   .9459893E-03   .1270730E-02   .1518118E-02
   .1697723E-02   .1840352E-02   .1914241E-02   .1869455E-02   .1711071E-02
   .1494922E-02   .1293601E-02   .1261196E-02   .1566882E-02   .2221459E-02
   .3060058E-02   .3868236E-02   .4486543E-02   .4870418E-02   .5069509E-02
   .5167087E-02   .5218258E-02   .5243729E-02   .4868118E-02   .3730708E-02
   .1884784E-02  -.3341102E-03  -.2468024E-02  -.4208511E-02  -.5458372E-02
  -.6262940E-02  -.6533318E-02  -.6289843E-02  -.5811646E-02  -.5412130E-02
  -.5157477E-02  -.4975224E-02  -.4831923E-02  -.4705176E-02  -.4478039E-02
  -.3961950E-02  -.3102057E-02  -.2092056E-02  -.1467505E-02  -.1618131E-02
  -.2439550E-02  -.3529525E-02  -.4452542E-02  -.4953931E-02  -.5006037E-02
  -.4766529E-02  -.4457807E-02  -.4263690E-02  -.4273487E-02  -.4489318E-02
  -.4741192E-02  -.4818123E-02  -.4647016E-02  -.4286365E-02  -.3855750E-02
  -.3467631E-02  -.3145375E-02  -.2843864E-02  -.2517339E-02  -.2147926E-02
  -.1739924E-02  -.1309577E-02  -.8706023E-03  -.4075739E-03   .1100756E-03
   .6881182E-03   .1295488E-02   .1866704E-02   .2104291E-02   .1756412E-02
   .9297542E-03  -.6424810E-04  -.8209811E-03  -.1087793E-02  -.8322485E-03
  -.1607774E-03   .7146950E-03   .1526548E-02   .2081437E-02   .2310501E-02
   .2279224E-02   .2116743E-02   .1967442E-02   .1931263E-02   .2054346E-02
   .2317695E-02   .2671264E-02   .3046471E-02   .3394817E-02   .3684324E-02
   .3925773E-02   .4230894E-02   .4735937E-02   .5436782E-02   .6250070E-02
   .7113087E-02   .8200448E-02   .9646953E-02   .1137379E-01   .1315537E-01
   .1474288E-01   .1536825E-01   .1444736E-01   .1229359E-01   .9727910E-02
   .7584845E-02   .6315491E-02   .5915615E-02   .5948463E-02   .5846277E-02
   .5236164E-02   .4038764E-02   .2400567E-02   .5619807E-03  -.1250547E-02
  -.2894524E-02  -.4277310E-02  -.5384270E-02  -.6290146E-02  -.7122465E-02
  -.7984114E-02  -.8903945E-02  -.9494417E-02  -.9369143E-02  -.8597365E-02
  -.7524927E-02  -.6424959E-02  -.5425687E-02  -.4682409E-02  -.4372095E-02
  -.4522909E-02  -.4952739E-02  -.5481097E-02  -.5948476E-02  -.6221311E-02
  -.6239446E-02  -.6033268E-02  -.5660687E-02  -.5087510E-02  -.4296690E-02
  -.3406147E-02  -.2584663E-02  -.1969371E-02  -.1599631E-02  -.1425036E-02
  -.1355810E-02  -.1333757E-02  -.1314857E-02  -.1336935E-02  -.1465534E-02
  -.1689620E-02  -.1938772E-02  -.2137934E-02  -.2251931E-02  -.2286039E-02
  -.2218443E-02  -.1999955E-02  -.1649571E-02  -.1256324E-02  -.9260931E-03
  -.7205731E-03  -.6469712E-03  -.6739613E-03  -.8701857E-03  -.1320144E-02
  -.1976239E-02  -.2684040E-02  -.3265665E-02  -.3552560E-02  -.3496207E-02
  -.3201867E-02  -.2806152E-02  -.2292515E-02  -.1625226E-02  -.8754490E-03
  -.9164784E-04   .9027767E-03   .2269271E-02   .3926113E-02   .5666045E-02
   .7274964E-02   .8526199E-02   .9159729E-02   .9148838E-02   .8711261E-02
   .7975595E-02   .7058544E-02   .6181906E-02   .5539339E-02   .5208634E-02
   .5117019E-02   .5113685E-02   .5076760E-02   .5064873E-02   .5157413E-02
   .5311208E-02   .5422000E-02   .5398966E-02   .5186311E-02   .4793886E-02
   .4315669E-02   .3865792E-02   .3518540E-02   .3125768E-02   .2466102E-02
   .1500897E-02   .3713318E-03  -.6939953E-03  -.1432233E-02  -.1725146E-02
  -.1688362E-02  -.1549702E-02  -.1450142E-02  -.1386840E-02  -.1337714E-02
  -.1312358E-02  -.1331389E-02  -.1396097E-02  -.1481944E-02  -.1549079E-02
  -.1563082E-02  -.1509657E-02  -.1402286E-02  -.1268041E-02  -.1125531E-02
  -.9901311E-03  -.9677288E-03  -.1175562E-02  -.1592529E-02  -.2122925E-02
  -.2752141E-02  -.3659400E-02  -.4925397E-02  -.6380775E-02  -.7315181E-02
  -.7107588E-02  -.5834886E-02  -.4047072E-02  -.2401533E-02  -.1309478E-02
  -.8508748E-03  -.8486585E-03  -.1014111E-02  -.1081587E-02  -.9173301E-03
  -.8180252E-03  -.1153213E-02  -.1923182E-02  -.2857821E-02  -.3537390E-02
  -.3705356E-02  -.3384949E-02  -.2673394E-02  -.1684987E-02  -.6410729E-03
   .2335952E-03   .7951693E-03   .1046140E-02   .1091479E-02   .1090435E-02
   .1159378E-02   .1366636E-02   .1727366E-02   .2220484E-02   .2800939E-02
   .3548062E-02   .4565720E-02   .5816434E-02   .7139821E-02   .8354369E-02
   .9249005E-02   .9661081E-02   .9633763E-02   .9396962E-02   .9191210E-02
   .8921644E-02   .8054976E-02   .6278944E-02   .3883795E-02   .1443271E-02
  -.5738854E-03  -.1983296E-02  -.2647631E-02  -.2549503E-02  -.1985046E-02
  -.1258681E-02  -.5198053E-03   .1183409E-03   .5398246E-03   .7120258E-03
   .6953032E-03   .5845602E-03   .3828676E-03   .1016895E-03  -.1626890E-03
  -.3199128E-03  -.4062499E-03  -.5048186E-03  -.6446470E-03  -.8133430E-03
  -.9710824E-03  -.1095754E-02  -.1199947E-02  -.1326818E-02  -.1616406E-02
  -.2208079E-02  -.3083234E-02  -.4099789E-02  -.5077490E-02  -.5860367E-02
  -.6350512E-02  -.6559852E-02  -.6392826E-02  -.5800802E-02  -.4962940E-02
  -.4142391E-02  -.3507530E-02  -.3031063E-02  -.2607323E-02  -.2153636E-02
  -.1630126E-02  -.1029972E-02  -.3767194E-03   .2922306E-03   .9482714E-03
   .1545342E-02   .1953891E-02   .2092532E-02   .2037030E-02   .1930275E-02
   .1887532E-02   .1763898E-02   .1361840E-02   .6814607E-03  -.1299760E-03
  -.8025136E-03  -.1018094E-02  -.6685667E-03   .5987098E-04   .8494570E-03
   .1422146E-02   .1649170E-02   .1562220E-02   .1297236E-02   .9995777E-03
   .5951668E-03  -.8583671E-04  -.1030425E-02  -.2065334E-02  -.2900063E-02
  -.3310961E-02  -.3288853E-02  -.2902473E-02  -.2220927E-02  -.1399986E-02
  -.6520157E-03  -.1410899E-03   .8819556E-04   .1074210E-03   .5519821E-04
   .6942255E-04   .2333164E-03   .5369468E-03   .6722245E-03   .1969500E-03
  -.9355845E-03  -.2385974E-02  -.3746206E-02  -.4751672E-02  -.5355053E-02
  -.5671240E-02  -.5798108E-02  -.5790877E-02  -.5686926E-02  -.5337218E-02
  -.4635101E-02  -.3692793E-02  -.2588290E-02  -.1335354E-02  -.1504355E-04
   .1265410E-02   .2420796E-02   .3358351E-02   .3982480E-02   .4313496E-02
   .4129273E-02   .3269031E-02   .1977368E-02   .6797894E-03  -.2532434E-03
  -.6683934E-03  -.6275876E-03  -.6596406E-04   .1030577E-02   .2370057E-02
   .3574227E-02   .4401265E-02   .4831271E-02   .4968731E-02   .4997795E-02
   .5086099E-02   .5362752E-02   .5899265E-02   .6685276E-02   .7299381E-02
   .7100903E-02   .5873664E-02   .3959720E-02   .1967126E-02   .4259367E-03
  -.4520994E-03  -.7818821E-03  -.8693342E-03  -.1039050E-02  -.1505427E-02
  -.2312247E-02  -.3234612E-02  -.3956759E-02  -.4349987E-02  -.4482829E-02
  -.4528764E-02  -.4629286E-02  -.4764954E-02  -.4836487E-02  -.4807303E-02
  -.4691642E-02  -.4534454E-02  -.4362706E-02  -.4194415E-02  -.4031589E-02
  -.3873810E-02  -.3727116E-02  -.3602953E-02  -.3489779E-02  -.3373798E-02
  -.3237995E-02  -.3077282E-02  -.2853727E-02  -.2522758E-02  -.2088966E-02
  -.1603577E-02  -.9959034E-03  -.1570339E-03   .8946425E-03   .2029051E-02
   .3099245E-02   .4015998E-02   .4774598E-02   .5410060E-02   .5745243E-02
   .5296603E-02   .3863399E-02   .1796783E-02  -.2994520E-03  -.1771119E-02
  -.2242383E-02  -.1824884E-02  -.8416673E-03   .3917002E-03   .1549460E-02
   .2357057E-02   .2740603E-02   .2818768E-02   .2774909E-02   .2782481E-02
   .2949163E-02   .3288484E-02   .3488063E-02   .3228383E-02   .2537074E-02
   .1659670E-02   .8856040E-03   .3990743E-03   .3867833E-03   .9885910E-03
   .2094554E-02   .3368346E-02   .4454213E-02   .5136225E-02   .5396753E-02
   .5365767E-02   .5165962E-02   .4886172E-02   .4637884E-02   .4525606E-02
   .4605864E-02   .4841358E-02   .4914540E-02   .4507244E-02   .3624270E-02
   .2467125E-02   .1299114E-02   .3008534E-03  -.4530984E-03  -.9606789E-03
  -.1134721E-02  -.9657177E-03  -.6156180E-03  -.2799799E-03  -.4765845E-04
   .6665176E-04   .8082401E-04   .2996237E-04  -.3119036E-04  -.5217764E-04
  -.5539068E-05  -.5724674E-05  -.2438676E-03  -.7761460E-03  -.1480114E-02
  -.2156584E-02  -.2599681E-02  -.2714355E-02  -.2468134E-02  -.1867789E-02
  -.1044519E-02  -.2209204E-03   .4114064E-03   .7682634E-03   .8883905E-03
   .8868416E-03   .8962656E-03   .9945717E-03   .1206266E-02   .1520908E-02
   .1908103E-02   .2326129E-02   .2738615E-02   .3112906E-02   .3418806E-02
   .3627872E-02   .3749420E-02   .3815471E-02   .3851718E-02   .3654745E-02
   .3024388E-02   .2027524E-02   .8593282E-03  -.2746367E-03  -.1237893E-02
  -.1987216E-02  -.2562429E-02  -.2951153E-02  -.3125392E-02  -.3126897E-02
  -.2972965E-02  -.2707028E-02  -.2442296E-02  -.2286661E-02  -.2290445E-02
  -.2424565E-02  -.2624027E-02  -.2811947E-02  -.2919059E-02  -.2910104E-02
  -.2858479E-02  -.2861341E-02  -.2949445E-02  -.3095155E-02  -.3232121E-02
  -.3138641E-02  -.2594182E-02  -.1630290E-02  -.4734473E-03   .6047579E-03
   .1435988E-02   .1987957E-02   .2329894E-02   .2448755E-02   .2168376E-02
   .1433471E-02   .4530325E-03  -.4763380E-03  -.1127959E-02  -.1441121E-02
  -.1490247E-02  -.1370688E-02  -.9958791E-03  -.3100552E-03   .5390267E-03
   .1320282E-02   .1852638E-02   .2060006E-02   .1956838E-02   .1658105E-02
   .1342126E-02   .1167450E-02   .1215858E-02   .1478802E-02   .1882462E-02
   .2316335E-02   .2676211E-02   .2907032E-02   .3012610E-02   .3035866E-02
   .3031650E-02   .3038441E-02   .3041210E-02   .2987334E-02   .2854966E-02
   .2667027E-02   .2470419E-02   .2303272E-02   .2183007E-02   .2102830E-02
   .2026016E-02   .1859437E-02   .1536354E-02   .1080191E-02   .5676301E-03
   .8126746E-04  -.3366497E-03  -.6903966E-03  -.1013831E-02  -.1336683E-02
  -.1664594E-02  -.1855687E-02  -.1773190E-02  -.1456579E-02  -.1048901E-02
  -.7054624E-03  -.5234136E-03  -.6127601E-03  -.1066499E-02  -.1827494E-02
  -.2699498E-02  -.3468730E-02  -.4004282E-02  -.4291037E-02  -.4406050E-02
  -.4457731E-02  -.4469349E-02  -.4328593E-02  -.3973667E-02  -.3486846E-02
  -.3020086E-02  -.2746882E-02  -.2899042E-02  -.3564035E-02  -.4559243E-02
  -.5586696E-02  -.6386899E-02  -.6831422E-02  -.6908601E-02  -.6647995E-02
  -.6041335E-02  -.5172584E-02  -.4246548E-02  -.3432347E-02  -.2751265E-02
  -.2148811E-02  -.1579517E-02  -.1009108E-02  -.4161695E-03   .2025584E-03
   .7219947E-03   .1025643E-02   .1151675E-02   .1225848E-02   .1372662E-02
   .1610230E-02   .1769720E-02   .1681310E-02   .1348081E-02   .8793430E-03
   .3932841E-03  -.5621469E-04  -.4530394E-03  -.8086538E-03  -.1141742E-02
  -.1472325E-02  -.1716146E-02  -.1760117E-02  -.1565923E-02  -.1088168E-02
  -.3575806E-03   .4779069E-03   .1270390E-02   .1920319E-02   .2411615E-02
   .2791303E-02   .3144774E-02   .3535535E-02   .3886578E-02   .3940173E-02
   .3568157E-02   .2900346E-02   .2190544E-02   .1653494E-02   .1379267E-02
   .1334670E-02   .1499835E-02   .1885748E-02   .2420826E-02   .2950837E-02
   .3327492E-02   .3443232E-02   .3241605E-02   .2776496E-02   .2208665E-02
   .1711558E-02   .1401282E-02   .1300242E-02   .1358897E-02   .1489851E-02
   .1654364E-02   .1835791E-02   .2000643E-02   .2113769E-02   .2158361E-02
   .2142443E-02   .2092526E-02   .2025441E-02   .1910752E-02   .1722140E-02
   .1485899E-02   .1252222E-02   .1064888E-02   .9395546E-03   .8646939E-03
   .8112576E-03   .7541997E-03   .7209719E-03   .7508291E-03   .8327272E-03
   .9303915E-03   .1001248E-02   .1015893E-02   .8705830E-03   .4314087E-03
  -.3029765E-03  -.1185896E-02  -.2035667E-02  -.2787873E-02  -.3473319E-02
  -.4119959E-02  -.4754425E-02  -.5388015E-02  -.5987830E-02  -.6377948E-02
  -.6437188E-02  -.6191799E-02  -.5746743E-02  -.5258792E-02  -.4877375E-02
  -.4677941E-02  -.4642382E-02  -.4649049E-02  -.4537600E-02  -.4213940E-02
  -.3689817E-02  -.3038092E-02  -.2329173E-02  -.1615045E-02  -.9368940E-03
  -.3155022E-03   .2389795E-03   .6414872E-03   .8236486E-03   .8465067E-03
   .8277217E-03   .8853139E-03   .1069424E-02   .1373684E-02   .1731464E-02
   .2073466E-02   .2340796E-02   .2497307E-02   .2309516E-02   .1594079E-02
   .4619512E-03  -.8037317E-03  -.1924058E-02  -.2738904E-02  -.3178873E-02
  -.3201816E-02  -.2879992E-02  -.2249267E-02  -.1336193E-02  -.3012239E-03
   .6372494E-03   .1322502E-02   .1725849E-02   .1935650E-02   .2094330E-02
   .2318053E-02   .2446094E-02   .2220211E-02   .1622135E-02   .8510995E-03
   .1686622E-03  -.2484888E-03  -.2897741E-03   .2662807E-03   .1485405E-02
   .3077293E-02   .4621325E-02   .5774240E-02   .6414473E-02   .6609367E-02
   .6352886E-02   .5388826E-02   .3681007E-02   .1604621E-02  -.3227580E-03
  -.1715326E-02  -.2358788E-02  -.2237590E-02  -.1618955E-02  -.9372882E-03
  -.5779257E-03  -.6947138E-03  -.1223748E-02  -.1990834E-02  -.2797044E-02
  -.3485995E-02  -.3966346E-02  -.4134449E-02  -.3895303E-02  -.3299765E-02
  -.2532642E-02  -.1799345E-02  -.1178933E-02  -.5748147E-03   .1238491E-03
   .9305941E-03   .1793154E-02   .2645281E-02   .3433564E-02   .4001842E-02
   .4056259E-02   .3493821E-02   .2548090E-02   .1583843E-02   .8969216E-03
   .5646681E-03   .4736259E-03   .4344074E-03   .2972142E-03  -.3935810E-06
  -.2546378E-03  -.2290240E-03   .8415389E-04   .5310964E-03   .9213434E-03
   .1137378E-02   .1161437E-02   .1059964E-02   .9355059E-03   .8787308E-03
   .9280795E-03   .9908572E-03   .8339446E-03   .3267280E-03  -.4482437E-03
  -.1294287E-02  -.2009062E-02  -.2294374E-02  -.1860614E-02  -.7468700E-03
   .6925324E-03   .2022156E-02   .2942904E-02   .3381886E-02   .3452722E-02
   .3278052E-02   .2736306E-02   .1736508E-02   .4839400E-03  -.7072869E-03
  -.1576171E-02  -.2054178E-02  -.2224453E-02  -.2241493E-02  -.1887893E-02
  -.8476410E-03   .8055432E-03   .2665071E-02   .4287068E-02   .5406236E-02
   .5979295E-02   .5757468E-02   .4518386E-02   .2535246E-02   .4143755E-03
  -.1260018E-02  -.2193378E-02  -.2409723E-02  -.1940923E-02  -.8592832E-03
   .5102854E-03   .1735429E-02   .2466084E-02   .2458900E-02   .1625874E-02
   .1916389E-03  -.1410012E-02  -.2750821E-02  -.3588445E-02  -.3906456E-02
  -.3830340E-02  -.3509192E-02  -.3110966E-02  -.2762440E-02  -.2401514E-02
  -.1933430E-02  -.1383979E-02  -.8418663E-03  -.3980900E-03  -.1727345E-03
  -.2227335E-03  -.4465739E-03  -.6782021E-03  -.7683688E-03  -.6536447E-03
  -.3423658E-03   .1010328E-03   .5886367E-03   .1030946E-02   .1371365E-02
   .1580555E-02   .1661680E-02   .1654056E-02   .1620602E-02   .1611370E-02
   .1595649E-02   .1445747E-02   .1082535E-02   .5590198E-03   .9754570E-05
  -.3007571E-03  -.1819988E-03   .3040118E-03   .9396065E-03   .1468249E-02
   .1551852E-02   .9488693E-03  -.2401635E-03  -.1681836E-02  -.3004194E-02
  -.3973996E-02  -.4533124E-02  -.4697261E-02  -.4535252E-02  -.4231058E-02
  -.3989887E-02  -.3935977E-02  -.3992067E-02  -.4026192E-02  -.3975291E-02
  -.3849896E-02  -.3685461E-02  -.3513821E-02  -.3326240E-02  -.3056162E-02
  -.2644980E-02  -.2113856E-02  -.1521865E-02  -.9412111E-03  -.4190234E-03
  -.3720667E-04   .1469444E-03   .1630549E-03   .1140545E-03   .1032231E-03
   .1895575E-03   .3149562E-03   .3890963E-03   .3731393E-03   .2834928E-03
   .1542616E-03  -.2265002E-04  -.3266522E-03  -.7959496E-03  -.1366328E-02
  -.1805884E-02  -.1754176E-02  -.1056600E-02   .8800567E-04   .1324207E-02
   .2345187E-02   .3036657E-02   .3439461E-02   .3689375E-02   .3920466E-02
   .4139771E-02   .4004585E-02   .3250510E-02   .2020873E-02   .6799231E-03
  -.4263599E-03  -.1136089E-02  -.1484944E-02  -.1614729E-02  -.1421117E-02
  -.7783765E-03   .1338371E-03   .9804468E-03   .1132453E-02   .1769173E-03
  -.1692359E-02  -.3905681E-02  -.5852441E-02  -.6965921E-02  -.7008614E-02
  -.6241453E-02  -.5176559E-02  -.4267752E-02  -.3698146E-02  -.3459497E-02
  -.3462377E-02  -.3583730E-02  -.3692559E-02  -.3615567E-02  -.3216125E-02
  -.2505007E-02  -.1607042E-02  -.6806631E-03   .1607681E-03   .8722715E-03
   .1469165E-02   .2001220E-02   .2524990E-02   .3067147E-02   .3494911E-02
   .3488479E-02   .2894539E-02   .1894389E-02   .8304578E-03   .8882037E-04
  -.1200433E-03   .1329915E-03   .5967053E-03   .9938138E-03   .1196763E-02
   .1388482E-02   .1796476E-02   .2436008E-02   .3178820E-02   .3802688E-02
   .4145164E-02   .4207416E-02   .4127823E-02   .4066318E-02   .4038059E-02
   .3691190E-02   .2729296E-02   .1264053E-02  -.3636411E-03  -.1794877E-02
  -.2741304E-02  -.2980342E-02  -.2571327E-02  -.1856687E-02  -.1230808E-02
  -.7378557E-03  -.2329768E-03   .3158635E-03   .8660507E-03   .1356467E-02
   .1778213E-02   .2163067E-02   .2552918E-02   .2773793E-02   .2601508E-02
   .2054540E-02   .1352267E-02   .7538265E-03   .4163501E-03   .3550832E-03
   .4771121E-03   .7313423E-03   .1130207E-02   .1631935E-02   .2122921E-02
   .2490481E-02   .2679583E-02   .2711255E-02   .2656635E-02   .2590490E-02
   .2554643E-02   .2569583E-02   .2647286E-02   .2771457E-02   .2791327E-02
   .2397189E-02   .1451980E-02   .1923842E-03  -.8202103E-03  -.1145798E-02
  -.7856559E-03  -.4583141E-04   .6770263E-03   .1100053E-02   .1127672E-02
   .8475871E-03   .4267410E-03   .3387995E-04  -.2246501E-03  -.3312351E-03
  -.3948360E-03  -.5289317E-03  -.7635132E-03  -.1059437E-02  -.1358940E-02
  -.1616982E-02  -.1813375E-02  -.1946165E-02  -.2043109E-02  -.2138339E-02
  -.2253428E-02  -.2281701E-02  -.2114842E-02  -.1775821E-02  -.1368690E-02
  -.1008307E-02  -.7603563E-03  -.6206508E-03  -.5319312E-03  -.4305156E-03
  -.2717896E-03  -.4331071E-04   .2516057E-03   .6384174E-03   .1125473E-02
   .1459587E-02   .1368650E-02   .8590134E-03   .1275300E-03  -.5696718E-03
  -.1049490E-02  -.1218597E-02  -.1117439E-02  -.8867857E-03  -.6864623E-03
  -.5451381E-03  -.3783413E-03  -.1257272E-03   .1950256E-03   .5402228E-03
   .8635294E-03   .1143537E-02   .1381434E-02   .1605946E-02   .1846906E-02
   .2131313E-02   .2461370E-02   .2810605E-02   .2950722E-02   .2675118E-02
   .2032642E-02   .1235707E-02   .5181308E-03   .3211362E-04  -.8577650E-04
   .2643030E-03   .9908035E-03   .1843248E-02   .2554068E-02   .2966837E-02
   .3068523E-02   .2973868E-02   .2834954E-02   .2759640E-02   .2555039E-02
   .1992205E-02   .1109425E-02   .1135148E-03  -.7578233E-03  -.1294162E-02
  -.1399994E-02  -.1185408E-02  -.8818794E-03  -.7127856E-03  -.7252847E-03
  -.8366020E-03  -.9618735E-03  -.1058211E-02  -.1112960E-02  -.1123161E-02
  -.1080526E-02  -.9838303E-03  -.8483239E-03  -.6932684E-03  -.5367328E-03
  -.3873768E-03  -.2327777E-03  -.4586880E-04   .1830101E-03   .4407503E-03
   .7025791E-03   .9480553E-03   .1170391E-02   .1375652E-02   .1558348E-02
   .1595869E-02   .1296719E-02   .6313253E-03  -.2366256E-03  -.9891574E-03
  -.1358002E-02  -.1296771E-02  -.9433721E-03  -.3705171E-03   .3692634E-03
   .1130162E-02   .1741477E-02   .2040757E-02   .1985711E-02   .1692121E-02
   .1354202E-02   .1135817E-02   .1032160E-02   .8399558E-03   .4009932E-03
  -.2592452E-03  -.1022410E-02  -.1757953E-02  -.2383770E-02  -.2881046E-02
  -.3294553E-02  -.3690217E-02  -.4110101E-02  -.4350135E-02  -.4198316E-02
  -.3707838E-02  -.3091443E-02  -.2578478E-02  -.2293504E-02  -.2250015E-02
  -.2471816E-02  -.2971134E-02  -.3627450E-02  -.4259920E-02  -.4707915E-02
  -.4917731E-02  -.4921100E-02  -.4786706E-02  -.4253454E-02  -.3073868E-02
  -.1404705E-02   .3776247E-03   .1906061E-02   .3006370E-02   .3690107E-02
   .3935221E-02   .3521912E-02   .2436529E-02   .1044607E-02  -.3192787E-04
  -.4171271E-03  -.4543061E-03  -.6854862E-03  -.1111435E-02  -.1292276E-02
  -.9465396E-03  -.1777549E-03   .6912512E-03   .1345523E-02   .1625505E-02
   .1542232E-02   .1115449E-02   .3838838E-03  -.4857418E-03  -.1273964E-02
  -.1769899E-02  -.1881175E-02  -.1671665E-02  -.1304601E-02  -.8227507E-03
  -.2274663E-03   .3968875E-03   .9389988E-03   .1333924E-02   .1676073E-02
   .2135881E-02   .2784992E-02   .3592807E-02   .4463021E-02   .5273999E-02
   .5574484E-02   .4913455E-02   .3360954E-02   .1400404E-02  -.3894470E-03
  -.1527297E-02  -.1771968E-02  -.1274745E-02  -.4508346E-03   .3772969E-03
   .1070634E-02   .1539739E-02   .1753052E-02   .1737250E-02   .1575895E-02
   .1226886E-02   .6552817E-03  -.2233018E-04  -.6249334E-03  -.1011226E-02
  -.1109399E-02  -.9401850E-03  -.6208580E-03  -.3044275E-03  -.1136986E-03
  -.9833907E-04  -.2002091E-03  -.3198259E-03  -.3950577E-03  -.4061073E-03
  -.3647630E-03  -.2941167E-03  -.2174874E-03  -.1497093E-03  -.9569519E-04
  -.4915213E-04   .4501112E-05   .7847259E-04   .1748175E-03   .2865128E-03
   .4016937E-03   .5091407E-03   .5814554E-03   .5954567E-03   .5576298E-03
   .4886690E-03   .3271389E-03  -.1318857E-04  -.5209320E-03  -.1106772E-02
  -.1655754E-02  -.2057363E-02  -.2154039E-02  -.1888026E-02  -.1387333E-02
  -.8629680E-03  -.4992464E-03  -.4359777E-03  -.7741550E-03  -.1472695E-02
  -.2332469E-02  -.3123304E-02  -.3674297E-02  -.3918996E-02  -.3739696E-02
  -.3100451E-02  -.2191354E-02  -.1288382E-02  -.6198110E-03  -.2739489E-03
  -.2136796E-03  -.3096053E-03  -.4077859E-03  -.3859656E-03  -.1960732E-03
   .1078920E-03   .4276150E-03   .6985287E-03   .8417622E-03   .8030900E-03
   .6108302E-03   .3527121E-03   .1192753E-03  -.3451398E-04  -.1001813E-03
  -.1007068E-03  -.7788884E-04  -.6066251E-04  -.2902183E-04   .4392575E-04
   .1460641E-03   .2474475E-03   .3195542E-03   .3547352E-03   .3615651E-03
   .3601487E-03   .3675027E-03   .3959120E-03   .4447476E-03   .5057488E-03
   .5673555E-03   .6137161E-03   .5292136E-03   .7965085E-04  -.8292094E-03
  -.2018583E-02  -.3022830E-02  -.3316818E-02  -.2760145E-02  -.1633341E-02
  -.4101229E-03   .5166910E-03   .9601159E-03   .9697971E-03   .7275066E-03
   .4329321E-03  -.6960081E-04  -.9897213E-03  -.2236384E-02  -.3537125E-02
  -.4602841E-02  -.5074944E-02  -.4725955E-02  -.3730385E-02  -.2520586E-02
  -.1544492E-02  -.1058633E-02  -.1083057E-02  -.1451209E-02  -.1970355E-02
  -.2467454E-02  -.2804077E-02  -.2910727E-02  -.2794883E-02  -.2495909E-02
  -.2083209E-02  -.1655410E-02  -.1298560E-02  -.1053115E-02  -.8355641E-03
  -.5166139E-03  -.5096093E-04   .5173067E-03   .1104777E-02   .1639109E-02
   .2061099E-02   .2354976E-02   .2568967E-02   .2770196E-02   .3001029E-02
   .3114125E-02   .2947974E-02   .2531325E-02   .2010244E-02   .1553542E-02
   .1263319E-02   .1150819E-02   .1145964E-02   .1164604E-02   .1240063E-02
   .1575066E-02   .2227616E-02   .2974806E-02   .3542261E-02   .3803997E-02
   .3795693E-02   .3635278E-02   .3232616E-02   .2419007E-02   .1257977E-02
  -.8185301E-05  -.1110684E-02  -.1883928E-02  -.2106173E-02  -.1697716E-02
  -.8979242E-03  -.8074479E-04   .4352961E-03   .5192026E-03   .2172117E-03
  -.3416428E-03  -.1119676E-02  -.2069626E-02  -.3041183E-02  -.3859478E-02
  -.4338773E-02  -.4387276E-02  -.4093382E-02  -.3582230E-02  -.2939497E-02
  -.2274039E-02  -.1711592E-02  -.1326358E-02  -.1050602E-02  -.7130989E-03
  -.1986902E-03   .4961012E-03   .1285933E-02   .1944634E-02   .2113900E-02
   .1647887E-02   .7496985E-03  -.2160928E-03  -.9205879E-03  -.1163690E-02
  -.9496829E-03  -.4739409E-03   .1361694E-04   .4081728E-03   .7387722E-03
   .1025571E-02   .1262682E-02   .1427914E-02   .1512129E-02   .1534970E-02
   .1550167E-02   .1610718E-02   .1741648E-02   .1827749E-02   .1678314E-02
   .1235420E-02   .6822568E-03   .2623856E-03   .9415953E-04   .1752198E-03
   .4772772E-03   .9304703E-03   .1400380E-02   .1761538E-02   .1947016E-02
   .1969978E-02   .1894994E-02   .1811238E-02   .1790970E-02   .1873082E-02
   .2049073E-02   .2267235E-02   .2281170E-02   .1874300E-02   .1095764E-02
   .1566955E-03  -.7039943E-03  -.1332023E-02  -.1575109E-02  -.1318633E-02
  -.6479143E-03   .1720479E-03   .8578175E-03   .1236044E-02   .1287844E-02
   .1103803E-02   .6949526E-03   .3815726E-04  -.7659506E-03  -.1531882E-02
  -.1998558E-02  -.1889026E-02  -.1150561E-02  -.3368091E-04   .1100723E-02
   .1957040E-02   .2418535E-02   .2536502E-02   .2476547E-02   .2418463E-02
   .2487318E-02   .2629988E-02   .2608974E-02   .2261269E-02   .1652747E-02
   .9648867E-03   .3797892E-03  -.1912335E-04  -.2423572E-03  -.3797840E-03
  -.5261679E-03  -.7319391E-03  -.7449220E-03  -.3077997E-03   .5263089E-03
   .1506635E-02   .2360317E-02   .2911094E-02   .2889132E-02   .2006071E-02
   .3475901E-03  -.1640567E-02  -.3430233E-02  -.4650836E-02  -.4902771E-02
  -.3983281E-02  -.2212131E-02  -.2320317E-03   .1343414E-02   .2187518E-02
   .2317405E-02   .1998507E-02   .1565479E-02   .1103392E-02   .5284281E-03
  -.1330501E-03  -.7522495E-03  -.1194042E-02  -.1408722E-02  -.1429728E-02
  -.1249012E-02  -.8073404E-03  -.1601681E-03   .5228951E-03   .1059785E-02
   .1355069E-02   .1419573E-02   .1349568E-02   .1263817E-02   .1248746E-02
   .1195216E-02   .9584977E-03   .5503415E-03   .8066329E-04  -.3230050E-03
  -.5952801E-03  -.7338388E-03  -.7470270E-03  -.5252384E-03  -.8692722E-05
   .6889694E-03   .1375783E-02   .1894236E-02   .2187046E-02   .2298029E-02
   .2325369E-02   .2340230E-02   .2276069E-02   .2061619E-02   .1743648E-02
   .1428149E-02   .1209811E-02   .1122951E-02   .1146809E-02   .1282244E-02
   .1560990E-02   .1953835E-02   .2367740E-02   .2701680E-02   .2901248E-02
   .2972247E-02   .2967674E-02   .2952853E-02   .2966388E-02   .3010108E-02
   .3071474E-02   .3074124E-02   .2859616E-02   .2354393E-02   .1649767E-02
   .9106454E-03   .2815219E-03  -.1775911E-03  -.4825297E-03  -.6411559E-03
  -.4922588E-03   .6463670E-04   .8849331E-03   .1715749E-02   .2338649E-02
   .2673748E-02   .2767198E-02   .2735510E-02   .2537473E-02   .2072334E-02
   .1392163E-02   .6745285E-03   .1001082E-03  -.2381170E-03  -.3623360E-03
  -.3697615E-03  -.3629418E-03  -.2249960E-03   .1923938E-03   .8287703E-03
   .1509631E-02   .2057258E-02   .2376019E-02   .2318222E-02   .1733589E-02
   .6910056E-03  -.5228562E-03  -.1584394E-02  -.2246223E-02  -.2416456E-02
  -.2201597E-02  -.1838917E-02  -.1570890E-02  -.1551161E-02  -.1805899E-02
  -.2246729E-02  -.2742427E-02  -.3185439E-02  -.3520630E-02  -.3741860E-02
  -.3879846E-02  -.3974608E-02  -.4046919E-02  -.3934202E-02  -.3477380E-02
  -.2734939E-02  -.1889995E-02  -.1139099E-02  -.5987006E-03  -.3128105E-03
  -.2286744E-03  -.2231709E-03  -.1630200E-03   .3628126E-04   .3975986E-03
   .8800876E-03   .1378139E-02   .1765199E-02   .1984557E-02   .2061793E-02
   .2071864E-02   .2088405E-02   .2157647E-02   .2272556E-02   .2393115E-02
   .2482084E-02   .2527818E-02   .2527366E-02   .2465898E-02   .2334821E-02
   .2161180E-02   .1980967E-02   .1822372E-02   .1646597E-02   .1404801E-02
   .1091388E-02   .7397173E-03   .3915917E-03   .7798158E-04  -.1964371E-03
  -.4429785E-03  -.6831448E-03  -.9311007E-03  -.1188231E-02  -.1354223E-02
  -.1314588E-02  -.1068006E-02  -.7183699E-03  -.4046020E-03  -.3494060E-03
  -.7227632E-03  -.1475094E-02  -.2389223E-02  -.3223807E-02  -.3818893E-02
  -.4122149E-02  -.3986160E-02  -.3335852E-02  -.2363346E-02  -.1371680E-02
  -.6236406E-03  -.2237909E-03  -.1268720E-03  -.1832876E-03  -.2312482E-03
  -.1455947E-03   .1146632E-03   .4727037E-03   .6500289E-03   .4326778E-03
  -.1362614E-03  -.8546801E-03  -.1501096E-02  -.1913287E-02  -.2027938E-02
  -.1913117E-02  -.1720099E-02  -.1601109E-02  -.1646114E-02  -.1838317E-02
  -.2100464E-02  -.2362615E-02  -.2581359E-02  -.2742775E-02  -.2852208E-02
  -.2927451E-02  -.2986530E-02  -.3043040E-02  -.3102062E-02  -.3153017E-02
  -.3181217E-02  -.3187411E-02  -.3180558E-02  -.3169449E-02  -.3111883E-02
  -.2964244E-02  -.2738649E-02  -.2481910E-02  -.2243049E-02  -.2050020E-02
  -.1905412E-02  -.1790953E-02  -.1676425E-02  -.1522344E-02  -.1307262E-02
  -.1040780E-02  -.7525141E-03  -.4727107E-03  -.2199505E-03   .2221786E-05
   .2022593E-03   .3978374E-03   .6092038E-03   .8439240E-03   .1096445E-02
   .1353605E-02   .1604942E-02   .1843011E-02   .2051977E-02   .2178585E-02
   .2190651E-02   .2117070E-02   .2017864E-02   .1934424E-02   .1877377E-02
   .1843282E-02   .1822618E-02   .1804858E-02   .1784829E-02   .1761973E-02
   .1732318E-02   .1689599E-02   .1631710E-02   .1559009E-02   .1469899E-02
   .1294167E-02   .9685489E-03   .5226296E-03   .3805133E-04  -.3995273E-03
  -.7449364E-03  -.9911026E-03  -.1106862E-02  -.9954810E-03  -.6343201E-03
  -.1322474E-03   .3505020E-03   .6888295E-03   .8411630E-03   .8489071E-03
   .7921749E-03   .6851366E-03   .4268214E-03  -.3371276E-04  -.6142570E-03
  -.1176336E-02  -.1610718E-02  -.1884251E-02  -.2032945E-02  -.2125529E-02
  -.2161326E-02  -.2075190E-02  -.1863239E-02  -.1602317E-02  -.1390597E-02
  -.1289955E-02  -.1305927E-02  -.1393300E-02  -.1488440E-02  -.1534176E-02
  -.1498541E-02  -.1374473E-02  -.1183567E-02  -.9607564E-03  -.7435675E-03
  -.5553746E-03  -.4139795E-03  -.3953405E-03  -.6624214E-03  -.1273058E-02
  -.2104657E-02  -.2952284E-02  -.3632707E-02  -.3900562E-02  -.3590930E-02
  -.2819847E-02  -.1890429E-02  -.1115066E-02  -.6729312E-03  -.5750431E-03
  -.7241679E-03  -.9793748E-03  -.1194632E-02  -.1263479E-02  -.1145525E-02
  -.8690303E-03  -.4885208E-03  -.4781796E-04   .4148455E-03   .9093940E-03
   .1469580E-02   .2079672E-02   .2691356E-02   .3252596E-02   .3743271E-02
   .4171467E-02   .4555495E-02   .4776096E-02   .4633741E-02   .4099189E-02
   .3350835E-02   .2632923E-02   .2128119E-02   .1927659E-02   .2118835E-02
   .2676348E-02   .3402897E-02   .4054434E-02   .4445414E-02   .4418389E-02
   .3876628E-02   .2923710E-02   .1824753E-02   .8594611E-03   .1965317E-03
  -.1426984E-03  -.2534662E-03  -.2328464E-03  -.1682092E-03  -.1510132E-03
  -.1946161E-03  -.2558010E-03  -.3106642E-03  -.3616852E-03  -.4214148E-03
  -.4929825E-03  -.5650514E-03  -.5968440E-03  -.5395497E-03  -.3797107E-03
  -.1479237E-03   .1058015E-03   .3420494E-03   .5421660E-03   .7070070E-03
   .8505931E-03   .9876253E-03   .1114328E-02   .1216474E-02   .1294404E-02
   .1361773E-02   .1435611E-02   .1524903E-02   .1614303E-02   .1681395E-02
   .1720758E-02   .1739081E-02   .1750065E-02   .1764574E-02   .1788903E-02
   .1815422E-02   .1830560E-02   .1824823E-02   .1801380E-02   .1767716E-02
   .1726924E-02   .1621938E-02   .1385824E-02   .1023704E-02   .5978296E-03
   .1488957E-03  -.3153196E-03  -.7791609E-03  -.1224580E-02  -.1636482E-02
  -.2006422E-02  -.2226473E-02  -.2179592E-02  -.1894261E-02  -.1512743E-02
  -.1203319E-02  -.1137849E-02  -.1436585E-02  -.2054975E-02  -.2814566E-02
  -.3500506E-02  -.3891323E-02  -.3776097E-02  -.3140819E-02  -.2204379E-02
  -.1267555E-02  -.5657778E-03  -.2061611E-03  -.1769778E-03  -.3606653E-03
  -.5835505E-03  -.6949368E-03  -.6161832E-03  -.3505863E-03   .2949172E-04
   .4017326E-03   .6663918E-03   .7964788E-03   .8230577E-03   .8040513E-03
   .7894240E-03   .8076684E-03   .8651128E-03   .9519839E-03   .1048412E-02
   .1136666E-02   .1209659E-02   .1310542E-02   .1511218E-02   .1830703E-02
   .2222098E-02   .2612448E-02   .2947356E-02   .3200669E-02   .3282297E-02
   .3005211E-02   .2307991E-02   .1356233E-02   .4017053E-03  -.3479197E-03
  -.7934160E-03  -.7215915E-03   .3648761E-04   .1319264E-02   .2740915E-02
   .3915958E-02   .4638947E-02   .4919550E-02   .4906263E-02   .4586007E-02
   .3647606E-02   .1975554E-02  -.1063452E-03  -.2109792E-02  -.3635221E-02
  -.4362835E-02  -.3983194E-02  -.2583853E-02  -.7215046E-03   .9287357E-03
   .1902814E-02   .2089314E-02   .1677338E-02   .9753119E-03   .3020818E-03
  -.9933914E-04  -.1538593E-03  -.2526392E-04   .7000845E-04   .3448614E-04
  -.1231110E-03  -.3416968E-03  -.5625510E-03  -.7569144E-03  -.9263545E-03
  -.1092325E-02  -.1276408E-02  -.1486079E-02  -.1652016E-02  -.1704347E-02
  -.1651795E-02  -.1554103E-02  -.1479597E-02  -.1468582E-02  -.1529788E-02
  -.1645701E-02  -.1782125E-02  -.1902530E-02  -.1979064E-02  -.1990191E-02
  -.1895368E-02  -.1679784E-02  -.1387986E-02  -.1087962E-02  -.8392784E-03
  -.6642500E-03  -.5508757E-03  -.4524972E-03  -.3031602E-03  -.6458643E-04
   .2505462E-03   .5942937E-03   .8578203E-03   .9418669E-03   .8485709E-03
   .6604983E-03   .4840378E-03   .3915677E-03   .3979053E-03   .4558212E-03
   .5023687E-03   .4978835E-03   .4331515E-03   .3223208E-03   .1887181E-03
   .5566369E-04  -.6205545E-04  -.1604990E-03  -.2353271E-03  -.2760353E-03
  -.2818079E-03  -.2692070E-03  -.2594640E-03  -.2697764E-03  -.3046138E-03
  -.3577675E-03  -.4168249E-03  -.4698110E-03  -.5096471E-03  -.5385401E-03
  -.5970943E-03  -.7485313E-03  -.1006669E-02  -.1322462E-02  -.1604700E-02
  -.1785615E-02  -.1859121E-02  -.1867155E-02  -.1865476E-02  -.1883710E-02
  -.1906382E-02  -.1914737E-02  -.1908203E-02  -.1887621E-02  -.1837105E-02
  -.1748294E-02  -.1631380E-02  -.1506263E-02  -.1388086E-02  -.1276238E-02
  -.1149376E-02  -.9939158E-03  -.8119143E-03  -.6233916E-03  -.4987202E-03
  -.6450454E-03  -.1194363E-02  -.2040273E-02  -.2907263E-02  -.3472855E-02
  -.3586694E-02  -.3334230E-02  -.2936192E-02  -.2612340E-02  -.2478249E-02
  -.2510165E-02  -.2622905E-02  -.2740865E-02  -.2818798E-02  -.2839949E-02
  -.2806963E-02  -.2724551E-02  -.2600874E-02  -.2453303E-02  -.2301388E-02
  -.2159441E-02  -.2033299E-02  -.1921486E-02  -.1817238E-02  -.1713993E-02
  -.1606417E-02  -.1492558E-02  -.1373108E-02  -.1251669E-02  -.1130543E-02
  -.1013630E-02  -.9019377E-03  -.7969374E-03  -.7070781E-03  -.6519443E-03
  -.6369529E-03  -.6497079E-03  -.6795183E-03  -.8395110E-03  -.1269026E-02
  -.1955401E-02  -.2746597E-02  -.3316467E-02  -.3380399E-02  -.2936787E-02
  -.2216606E-02  -.1519633E-02  -.1062229E-02  -.9243161E-03  -.1111510E-02
  -.1592428E-02  -.2238966E-02  -.2839772E-02  -.3169592E-02  -.3136236E-02
  -.2808729E-02  -.2339654E-02  -.1718993E-02  -.8605807E-03   .1471346E-03
   .9912360E-03   .1404031E-02   .1378799E-02   .1101770E-02   .8233654E-03
   .7315727E-03   .8998691E-03   .1285119E-02   .1772627E-02   .2240895E-02
   .2611750E-02   .2860300E-02   .3005810E-02   .3082943E-02   .3124545E-02
   .3161447E-02   .3216233E-02   .3289001E-02   .3258522E-02   .3006460E-02
   .2558307E-02   .2020750E-02   .1466484E-02   .9186251E-03   .4081218E-03
  -.2292926E-04  -.2685854E-03  -.2798689E-03  -.1349509E-03   .2276575E-04
   .7333327E-04  -.2343045E-04  -.2326226E-03  -.4872969E-03  -.6843578E-03
  -.7251565E-03  -.5832562E-03  -.3133974E-03  -.3394477E-05   .2702793E-03
   .4696336E-03   .5951897E-03   .6760825E-03   .7490439E-03   .8446087E-03
   .9762018E-03   .1142281E-02   .1330885E-02   .1527924E-02   .1720000E-02
   .1898046E-02   .2037905E-02   .2068172E-02   .1941865E-02   .1698720E-02
   .1421264E-02   .1190683E-02   .1047733E-02   .9977180E-03   .1009326E-02
   .1036213E-02   .1032175E-02   .9744330E-03   .8626502E-03   .7424242E-03
   .6656279E-03   .6536314E-03   .6883257E-03   .7359915E-03   .7220738E-03
   .5680555E-03   .2608966E-03  -.1311284E-03  -.5124828E-03  -.7475721E-03
  -.7523856E-03  -.5005063E-03  -.4534328E-04   .4782910E-03   .9373761E-03
   .1314040E-02   .1696138E-02   .2155414E-02   .2690433E-02   .3241207E-02
   .3562906E-02   .3454045E-02   .2982862E-02   .2376181E-02   .1877731E-02
   .1625337E-02   .1629048E-02   .1796231E-02   .2004419E-02   .2202384E-02
   .2401899E-02   .2593026E-02   .2748394E-02   .2831724E-02   .2821834E-02
   .2729092E-02   .2601684E-02   .2489541E-02   .2402922E-02   .2244212E-02
   .1929674E-02   .1482806E-02   .9943296E-03   .5612077E-03   .3009543E-03
   .2706012E-03   .4070684E-03   .5859852E-03   .6892377E-03   .6546782E-03
   .4712122E-03   .1594981E-03  -.2270540E-03  -.6137994E-03  -.9386223E-03
  -.1168773E-02  -.1291980E-02  -.1310771E-02  -.1260959E-02  -.1198233E-02
  -.1174195E-02  -.1212841E-02  -.1311682E-02  -.1446424E-02  -.1597102E-02
  -.1747950E-02  -.1886146E-02  -.1999883E-02  -.2087405E-02  -.2152071E-02
  -.2212016E-02  -.2337254E-02  -.2627205E-02  -.3097562E-02  -.3670644E-02
  -.4179208E-02  -.4479246E-02  -.4543160E-02  -.4442689E-02  -.4163994E-02
  -.3686564E-02  -.3101971E-02  -.2541984E-02  -.2083649E-02  -.1695953E-02
  -.1312332E-02  -.8924098E-03  -.4241766E-03   .7971698E-04   .5839402E-03
   .8446205E-03   .6495176E-03   .7299237E-04  -.6426120E-03  -.1236091E-02
  -.1527695E-02  -.1467493E-02  -.1158523E-02  -.7195056E-03  -.2296058E-03
   .2346950E-03   .5916985E-03   .7993763E-03   .8692862E-03   .8613940E-03
   .8483853E-03   .8935737E-03   .1025921E-02   .1240666E-02   .1473420E-02
   .1635566E-02   .1685698E-02   .1650363E-02   .1582216E-02   .1499780E-02
   .1395815E-02   .1282245E-02   .1173805E-02   .1089598E-02   .1031816E-02
   .9915023E-03   .9473886E-03   .8853838E-03   .7934475E-03   .6592015E-03
   .3226321E-03  -.3536032E-03  -.1302509E-02  -.2334755E-02  -.3207203E-02
  -.3707264E-02  -.3783128E-02  -.3542547E-02  -.3060222E-02  -.2425206E-02
  -.1797449E-02  -.1325822E-02  -.1085694E-02  -.1051182E-02  -.1123043E-02
  -.1180609E-02  -.1147026E-02  -.1034791E-02  -.8914472E-03  -.7402535E-03
  -.5843073E-03  -.4198186E-03  -.2635595E-03  -.1570756E-03  -.1253606E-03
  -.1550180E-03  -.2141027E-03  -.2700852E-03  -.3065185E-03  -.3224204E-03
  -.3335554E-03  -.3929474E-03  -.5593379E-03  -.8283740E-03  -.1141234E-02
  -.1325118E-02  -.1239449E-02  -.9085588E-03  -.4639348E-03  -.5639030E-04
   .2157353E-03   .3199909E-03   .2824230E-03   .1734105E-03   .7542422E-04
   .4863284E-04   .1155417E-03   .2566250E-03   .3955380E-03   .4059080E-03
   .2215538E-03  -.1138195E-03  -.4932407E-03  -.7516359E-03  -.7622772E-03
  -.5358348E-03  -.1865619E-03   .1428393E-03   .3542242E-03   .4167200E-03
   .3637808E-03   .2589339E-03   .1667559E-03   .1226776E-03   .1397210E-03
   .2070422E-03   .2976074E-03   .2950090E-03   .9918669E-04  -.2713447E-03
  -.7203948E-03  -.1141405E-02  -.1465629E-02  -.1671655E-02  -.1674724E-02
  -.1421160E-02  -.9968232E-03  -.5524372E-03  -.2228054E-03  -.6412634E-04
  -.4189109E-04  -.7016023E-04  -.7116174E-04   .2112351E-05   .1398840E-03
   .2826422E-03   .3797895E-03   .4276775E-03   .4502582E-03   .4817528E-03
   .5448224E-03   .6767815E-03   .8956609E-03   .1171163E-02   .1450749E-02
   .1687505E-02   .1861488E-02   .1976398E-02   .2054019E-02   .2121292E-02
   .2181126E-02   .2167979E-02   .2030108E-02   .1795921E-02   .1540212E-02
   .1334591E-02   .1212068E-02   .1166136E-02   .1195051E-02   .1288469E-02
   .1403199E-02   .1488965E-02   .1510094E-02   .1462821E-02   .1367211E-02
   .1257527E-02   .1159283E-02   .1056325E-02   .9116477E-03   .7219489E-03
   .5113252E-03   .3145549E-03   .1554395E-03   .6761386E-04   .7256666E-04
   .1473677E-03   .2368660E-03   .2543064E-03   .1400062E-03  -.9155863E-04
  -.3803084E-03  -.6542092E-03  -.8508127E-03  -.9391830E-03  -.9383102E-03
  -.8951068E-03  -.8613625E-03  -.8695720E-03  -.9272761E-03  -.1001713E-02
  -.1042189E-02  -.1019985E-02  -.9458006E-03  -.8481509E-03  -.7577488E-03
  -.6899905E-03  -.6484278E-03  -.6212478E-03  -.5965544E-03  -.5629335E-03
  -.5442711E-03  -.5973073E-03  -.7584981E-03  -.1030598E-02  -.1481835E-02
  -.2135981E-02  -.2886302E-02  -.3362677E-02  -.3248049E-02  -.2589913E-02
  -.1670507E-02  -.8024477E-03  -.1480913E-03   .2617585E-03   .4863703E-03
   .6168883E-03   .7068761E-03   .6571273E-03   .3881283E-03  -.2534963E-04
  -.4333931E-03  -.7031325E-03  -.7634314E-03  -.5669011E-03  -.1463767E-03
   .3659058E-03   .8158638E-03   .1097133E-02   .1186287E-02   .1130165E-02
   .1013352E-02   .9208656E-03   .9111766E-03   .1000889E-02   .1171410E-02
   .1384814E-02   .1615970E-02   .1856767E-02   .2098673E-02   .2328288E-02
   .2535054E-02   .2722886E-02   .2910766E-02   .3115283E-02   .3338674E-02
   .3575168E-02   .3813153E-02   .4039616E-02   .4192906E-02   .4208671E-02
   .4095390E-02   .3912513E-02   .3669954E-02   .3337416E-02   .2935883E-02
   .2531250E-02   .2312560E-02   .2422472E-02   .2809061E-02   .3302210E-02
   .3720160E-02   .3952145E-02   .3984481E-02   .3878815E-02   .3731304E-02
   .3626255E-02   .3595520E-02   .3462061E-02   .2994470E-02   .2173957E-02
   .1173435E-02   .2837759E-03  -.2040759E-03  -.1932029E-03   .1706530E-03
   .7255268E-03   .1324272E-02   .1812970E-02   .2094211E-02   .2160189E-02
   .2103717E-02   .2113852E-02   .2345435E-02   .2814100E-02   .3400512E-02
   .3843101E-02   .3952358E-02   .3755201E-02   .3414208E-02   .3113852E-02
   .2949119E-02   .2923580E-02   .2989868E-02   .3081905E-02   .3140861E-02
   .3131236E-02   .3045490E-02   .2897320E-02   .2697223E-02   .2444879E-02
   .2155326E-02   .1857265E-02   .1574019E-02   .1243529E-02   .7978847E-03
   .2490535E-03  -.3377399E-03  -.8772999E-03  -.1174732E-02  -.1053265E-02
  -.5575150E-03   .1026923E-03   .6836922E-03   .1008883E-02   .1013009E-02
   .7682353E-03   .4289137E-03   .1546368E-03   .4730832E-04   .1307769E-03
   .3575697E-03   .6489387E-03   .9255878E-03   .1133632E-02   .1245902E-02
   .1270235E-02   .1240979E-02   .1201422E-02   .1182517E-02   .1196992E-02
   .1226397E-02   .1241947E-02   .1228611E-02   .1190624E-02   .1141146E-02
   .1093559E-02   .1050526E-02   .9526541E-03   .7041716E-03   .2850068E-03
  -.2226979E-03  -.6824605E-03  -.1001673E-02  -.1172027E-02  -.1245650E-02
  -.1242515E-02  -.1159736E-02  -.1030969E-02  -.9143260E-03  -.8519083E-03
  -.8369679E-03  -.8359952E-03  -.8222542E-03  -.7808473E-03  -.7090423E-03
  -.6102620E-03  -.4875690E-03  -.3294420E-03  -.1290905E-03   .1010140E-03
   .3364606E-03   .5542388E-03   .7422580E-03   .9030140E-03   .1046746E-02
   .1182626E-02   .1312921E-02   .1440942E-02   .1570448E-02   .1704975E-02
   .1843459E-02   .1970633E-02   .2038904E-02   .2015166E-02   .1911774E-02
   .1703370E-02   .1371155E-02   .9638946E-03   .5567426E-03   .2139647E-03
  -.4128508E-04  -.2243021E-03  -.3785168E-03  -.5473560E-03  -.7588919E-03
  -.1006045E-02  -.1268777E-02  -.1530452E-02  -.1784154E-02  -.2026677E-02
  -.2259523E-02  -.2481565E-02  -.2688071E-02  -.2818370E-02  -.2805804E-02
  -.2657979E-02  -.2444540E-02  -.2248201E-02  -.2122157E-02  -.2073827E-02
  -.2076178E-02  -.2089220E-02  -.2078507E-02  -.2024831E-02  -.1927159E-02
  -.1795260E-02  -.1623770E-02  -.1402358E-02  -.1144865E-02  -.8792478E-03
  -.6321005E-03  -.4059257E-03  -.1923863E-03   .1654021E-04   .2250149E-03
   .4340058E-03   .6430278E-03   .8465469E-03   .9779497E-03   .8980644E-03
   .5480124E-03   .2781137E-04  -.4757192E-03  -.8097259E-03  -.9374300E-03
  -.9146215E-03  -.8390020E-03  -.7218914E-03  -.5462270E-03  -.3447431E-03
  -.1733660E-03  -.7640048E-04  -.7189451E-04  -.1713261E-03  -.3571436E-03
  -.5700994E-03  -.7454463E-03  -.8388327E-03  -.8431888E-03  -.7830917E-03
  -.6996797E-03  -.6326472E-03  -.6088738E-03  -.6336689E-03  -.6961604E-03
  -.7757462E-03  -.8539360E-03  -.9177203E-03  -.9647646E-03  -.9993015E-03
  -.1049624E-02  -.1152708E-02  -.1319129E-02  -.1524549E-02  -.1733536E-02
  -.1919513E-02  -.2109007E-02  -.2349272E-02  -.2652489E-02  -.2993674E-02
  -.3335740E-02  -.3648956E-02  -.3912490E-02  -.4092087E-02  -.4176843E-02
  -.4201318E-02  -.4196135E-02  -.4153690E-02  -.4067409E-02  -.3959390E-02
  -.3860804E-02  -.3793091E-02  -.3757809E-02  -.3737608E-02  -.3680485E-02
  -.3523038E-02  -.3249013E-02  -.2897461E-02  -.2529613E-02  -.2196369E-02
  -.1921478E-02  -.1709500E-02  -.1558998E-02  -.1452355E-02  -.1355751E-02
  -.1236029E-02  -.1075525E-02  -.8762667E-03  -.6708298E-03  -.4953500E-03
  -.3627539E-03  -.2661037E-03  -.1872718E-03  -.1099894E-03  -.2317390E-04
   .8110434E-04   .2208747E-03   .4043671E-03   .6149715E-03   .8252091E-03
   .1011994E-02   .1165937E-02   .1287505E-02   .1354098E-02   .1347908E-02
   .1292012E-02   .1228843E-02   .1197664E-02   .1225661E-02   .1320062E-02
   .1457985E-02   .1600551E-02   .1706241E-02   .1703709E-02   .1513662E-02
   .1140324E-02   .6671774E-03   .1735822E-03  -.3789381E-03  -.1042461E-02
  -.1785634E-02  -.2534181E-02  -.3217290E-02  -.3790342E-02  -.4129069E-02
  -.4076651E-02  -.3654426E-02  -.3065947E-02  -.2557716E-02  -.2288606E-02
  -.2287200E-02  -.2477050E-02  -.2810726E-02  -.3242650E-02  -.3670492E-02
  -.3993003E-02  -.4148964E-02  -.4122005E-02  -.3876876E-02  -.3430796E-02
  -.2894642E-02  -.2404381E-02  -.2058796E-02  -.1881733E-02  -.1832398E-02
  -.1829357E-02  -.1786553E-02  -.1651368E-02  -.1418248E-02  -.1116482E-02
  -.7948911E-03  -.5538597E-03  -.5080317E-03  -.6741150E-03  -.9655900E-03
  -.1259115E-02  -.1450659E-02  -.1480589E-02  -.1363013E-02  -.1171345E-02
  -.9940062E-03  -.8921670E-03  -.8700883E-03  -.8835422E-03  -.8885522E-03
  -.8640368E-03  -.8105609E-03  -.7383363E-03  -.6586734E-03  -.5780555E-03
  -.5000043E-03  -.4270556E-03  -.3886627E-03  -.4181229E-03  -.5106887E-03
  -.6317565E-03  -.7406104E-03  -.8116637E-03  -.8402338E-03  -.8325817E-03
  -.7292198E-03  -.4771469E-03  -.1139512E-03   .2741972E-03   .6047390E-03
   .8423388E-03   .9989756E-03   .1114845E-02   .1233405E-02   .1386941E-02
   .1583938E-02   .1781348E-02   .1927512E-02   .2016624E-02   .2072094E-02
   .2129231E-02   .2209768E-02   .2319605E-02   .2445399E-02   .2570221E-02
   .2678933E-02   .2765424E-02   .2829901E-02   .2879376E-02   .2920552E-02
   .2960471E-02   .3005171E-02   .3060570E-02   .3126025E-02   .3196750E-02
   .3266406E-02   .3327448E-02   .3339425E-02   .3166654E-02   .2717013E-02
   .2028381E-02   .1202280E-02   .3745242E-03  -.3340900E-03  -.7322063E-03
  -.6328965E-03  -.6536603E-04   .7208091E-03   .1427017E-02   .1847615E-02
   .1933011E-02   .1735040E-02   .1359126E-02   .9452570E-03   .6316479E-03
   .4992168E-03   .5575009E-03   .7501056E-03   .9910523E-03   .1191044E-02
   .1297497E-02   .1301890E-02   .1232285E-02   .1129655E-02   .1034373E-02
   .9761319E-03   .9693636E-03   .1001339E-02   .1051442E-02   .1092363E-02
   .1089034E-02   .9549342E-03   .6440578E-03   .2055858E-03  -.2493768E-03
  -.6101892E-03  -.8204137E-03  -.8843359E-03  -.8006480E-03  -.5995189E-03
  -.3594577E-03  -.1690144E-03  -.7845099E-04  -.9544447E-04  -.1996541E-03
  -.5071173E-03  -.1115504E-02  -.1931191E-02  -.2669662E-02  -.3045046E-02
  -.2990179E-02  -.2637253E-02  -.2192125E-02  -.1802615E-02  -.1545811E-02
  -.1440869E-02  -.1459673E-02  -.1543360E-02  -.1626684E-02  -.1659568E-02
  -.1619295E-02  -.1508267E-02  -.1350969E-02  -.1180413E-02  -.1023021E-02
  -.8906659E-03  -.7827624E-03  -.6955503E-03  -.6628851E-03  -.7273431E-03
  -.8800380E-03  -.1073047E-02  -.1245639E-02  -.1336636E-02  -.1308208E-02
  -.1183678E-02  -.1021048E-02  -.8870676E-03  -.8312287E-03  -.9835588E-03
  -.1430392E-02  -.2099144E-02  -.2828685E-02  -.3465925E-02  -.3927995E-02
  -.4204577E-02  -.4199190E-02  -.3817883E-02  -.3146874E-02  -.2398773E-02
  -.1788328E-02  -.1430309E-02  -.1324991E-02  -.1461435E-02  -.1809368E-02
  -.2253048E-02  -.2642070E-02  -.2862696E-02  -.2883651E-02  -.2739851E-02
  -.2433823E-02  -.1929110E-02  -.1267400E-02  -.5726029E-03   .2450630E-04
   .4512254E-03   .6950348E-03   .7519573E-03   .6599808E-03   .5218722E-03
   .4465952E-03   .5015578E-03   .6921783E-03   .9745495E-03   .1269603E-02
   .1489214E-02   .1584575E-02   .1568284E-02   .1488428E-02   .1401648E-02
   .1346971E-02   .1338328E-02   .1366230E-02   .1410318E-02   .1448426E-02
   .1466832E-02   .1462207E-02   .1448097E-02   .1447783E-02   .1473202E-02
   .1520468E-02   .1574682E-02   .1623044E-02   .1657170E-02   .1674148E-02
   .1640339E-02   .1519791E-02   .1324711E-02   .1101962E-02   .9020709E-03
   .7545199E-03   .6629466E-03   .6092596E-03   .5649461E-03   .5044770E-03
   .4139388E-03   .2918098E-03   .1464924E-03  -.7077478E-05  -.1588977E-03
  -.3021791E-03  -.4339922E-03  -.5515248E-03  -.6380236E-03  -.6250430E-03
  -.4704963E-03  -.2109020E-03   .7537020E-04   .3158778E-03   .4742021E-03
   .5539667E-03   .5730195E-03   .5596783E-03   .5510628E-03   .5789753E-03
   .6565822E-03   .7798281E-03   .9305249E-03   .1108992E-02   .1314978E-02
   .1532702E-02   .1736062E-02   .1893988E-02   .1847749E-02   .1435112E-02
   .6892432E-03  -.2022241E-03  -.1009298E-02  -.1450872E-02  -.1290476E-02
  -.5646160E-03   .4403290E-03   .1372738E-02   .1988092E-02   .2213112E-02
   .2068577E-02   .1663165E-02   .1190567E-02   .8292277E-03   .6306017E-03
   .5145907E-03   .3969532E-03   .2437761E-03   .8565259E-04  -.2576905E-04
  -.7159818E-04  -.8198552E-04  -.1043777E-03  -.1792160E-03  -.3267645E-03
  -.5452404E-03  -.8060811E-03  -.1071876E-02  -.1309363E-02  -.1502799E-02
  -.1646513E-02  -.1737353E-02  -.1781741E-02  -.1805459E-02  -.1835236E-02
  -.1891378E-02  -.1975984E-02  -.2073851E-02  -.2096204E-02  -.1965733E-02
  -.1699682E-02  -.1375439E-02  -.1076167E-02  -.8517745E-03  -.7085445E-03
  -.6257863E-03  -.5830319E-03  -.5570387E-03  -.5166769E-03  -.4391276E-03
  -.3172685E-03  -.1612215E-03   .7184509E-05   .1629485E-03   .2758661E-03
   .3244719E-03   .3164809E-03   .2746731E-03   .1863393E-03   .2115438E-04
  -.2093852E-03  -.4621649E-03  -.6902586E-03  -.8890142E-03  -.1089690E-02
  -.1320248E-02  -.1583611E-02  -.1865866E-02  -.2132302E-02  -.2334791E-02
  -.2452953E-02  -.2514012E-02  -.2564974E-02  -.2646312E-02  -.2769308E-02
  -.2874191E-02  -.2878094E-02  -.2762598E-02  -.2566619E-02  -.2348317E-02
  -.2151765E-02  -.2000883E-02  -.1892172E-02  -.1807499E-02  -.1720993E-02
  -.1614466E-02  -.1479329E-02  -.1319677E-02  -.1143495E-02  -.9623193E-03
  -.7773021E-03  -.5876817E-03  -.3946090E-03  -.2055387E-03  -.2489747E-04
   .1441440E-03   .3043632E-03   .4576255E-03   .6102355E-03   .7662807E-03
   .9289384E-03   .1095282E-02   .1262259E-02   .1424024E-02   .1580242E-02
   .1728712E-02   .1872950E-02   .2014111E-02   .2160057E-02   .2313032E-02
   .2471877E-02   .2629205E-02   .2786444E-02   .2982480E-02   .3313087E-02
   .3816326E-02   .4439229E-02   .5067706E-02   .5537735E-02   .5527464E-02
   .4868218E-02   .3740903E-02   .2507787E-02   .1518824E-02   .1174612E-02
   .1717803E-02   .2947594E-02   .4330539E-02   .5341691E-02   .5740057E-02
   .5574655E-02   .5052965E-02   .4400444E-02   .3826624E-02   .3472934E-02
   .3386552E-02   .3523271E-02   .3835648E-02   .4270160E-02   .4737478E-02
   .5133858E-02   .5388947E-02   .5492755E-02   .5488205E-02   .5445467E-02
   .5427124E-02   .5464372E-02   .5475904E-02   .5363376E-02   .5127417E-02
   .4829791E-02   .4548646E-02   .4331152E-02   .4187467E-02   .4091602E-02
   .4005535E-02   .3891442E-02   .3708627E-02   .3422915E-02   .3042713E-02
   .2613014E-02   .2190470E-02   .1815635E-02   .1516012E-02   .1299909E-02
   .1147084E-02   .1014055E-02   .8620651E-03   .6889651E-03   .5392843E-03
   .4480379E-03   .4106399E-03   .3978162E-03   .3884895E-03   .3969188E-03
   .4454133E-03   .5296453E-03   .6312033E-03   .7284022E-03   .8110883E-03
   .8785125E-03   .9387114E-03   .1000207E-02   .1070964E-02   .1153470E-02
   .1241069E-02   .1268695E-02   .1164202E-02   .9298494E-03   .6350912E-03
   .4158811E-03   .3885288E-03   .5593392E-03   .8434085E-03   .1125893E-02
   .1320883E-02   .1396725E-02   .1372448E-02   .1286589E-02   .1088424E-02
   .6985641E-03   .1445480E-03  -.4594916E-03  -.9377330E-03  -.1156990E-02
  -.1068935E-02  -.7268056E-03  -.2798866E-03   .1051894E-03   .3181107E-03
   .3372183E-03   .2162587E-03   .4682473E-04  -.8524316E-04  -.1274104E-03
  -.6965152E-04   .5766640E-04   .1290980E-03  -.1922699E-04  -.4365522E-03
  -.1030210E-02  -.1646704E-02  -.2160557E-02  -.2521390E-02  -.2752403E-02
  -.2914592E-02  -.3024860E-02  -.3016220E-02  -.2856652E-02  -.2611624E-02
  -.2383698E-02  -.2252355E-02  -.2244651E-02  -.2406517E-02  -.2746447E-02
  -.3180824E-02  -.3592157E-02  -.3887509E-02  -.4035230E-02  -.4061893E-02
  -.4024074E-02  -.3963295E-02  -.3816827E-02  -.3519957E-02  -.3114098E-02
  -.2693849E-02  -.2349694E-02  -.2119766E-02  -.2002510E-02  -.1972745E-02
  -.1985327E-02  -.1978555E-02  -.1909043E-02  -.1771616E-02  -.1628053E-02
  -.1539809E-02  -.1519218E-02  -.1512716E-02  -.1458968E-02  -.1341083E-02
  -.1181440E-02  -.1019213E-02  -.8866373E-03  -.8007838E-03  -.7816850E-03
  -.8986958E-03  -.1183857E-02  -.1520039E-02  -.1719579E-02  -.1678926E-02
  -.1431760E-02  -.1092219E-02  -.7840793E-03  -.5853508E-03  -.5141952E-03
  -.5371237E-03  -.5987130E-03  -.6439749E-03  -.6431963E-03  -.6195857E-03
  -.6545113E-03  -.7989709E-03  -.1035045E-02  -.1313017E-02  -.1582563E-02
  -.1808533E-02  -.1981802E-02  -.2112297E-02  -.2190602E-02  -.2208666E-02
  -.2195934E-02  -.2192053E-02  -.2222625E-02  -.2218607E-02  -.2082270E-02
  -.1796692E-02  -.1425039E-02  -.1061658E-02  -.7931667E-03  -.6532981E-03
  -.6090344E-03  -.5932311E-03  -.5414143E-03  -.4178083E-03  -.2200378E-03
   .2424680E-04   .2441173E-03   .2815667E-03   .3434398E-04  -.4313125E-03
  -.9084922E-03  -.1123317E-02  -.9460309E-03  -.4589092E-03   .1363451E-03
   .6447144E-03   .9523231E-03   .1050080E-02   .1002408E-02   .9064280E-03
   .8479600E-03   .8808594E-03   .1014353E-02   .1225428E-02   .1470063E-02
   .1703076E-02   .1836204E-02   .1793070E-02   .1585222E-02   .1295132E-02
   .1019537E-02   .8242235E-03   .7267889E-03   .7261514E-03   .8588191E-03
   .1137629E-02   .1493676E-02   .1832230E-02   .2076028E-02   .2191577E-02
   .2077912E-02   .1607053E-02   .8012029E-03  -.1512926E-03  -.1029350E-02
  -.1681779E-02  -.2068246E-02  -.2107391E-02  -.1695554E-02  -.9049161E-03
   .1085345E-04   .7804258E-03   .1237800E-02   .1388070E-02   .1437369E-02
   .1650510E-02   .1816269E-02   .1569815E-02   .8784649E-03  -.3887992E-04
  -.8807986E-03  -.1411601E-02  -.1503404E-02  -.1215072E-02  -.7522844E-03
  -.3532326E-03  -.1756050E-03  -.2162480E-03  -.3414402E-03  -.4257299E-03
  -.4119665E-03  -.3136900E-03  -.1759386E-03  -.4060522E-04   .7560290E-04
   .1754709E-03   .2738585E-03   .3806608E-03   .4792558E-03   .5328601E-03
   .5260696E-03   .4372123E-03   .2640704E-03   .4771309E-04  -.1592606E-03
  -.3184644E-03  -.4108262E-03  -.4381035E-03  -.4043894E-03  -.2585458E-03
   .2860940E-04   .4006586E-03   .7673481E-03   .1060707E-02   .1264888E-02
   .1400123E-02   .1510377E-02   .1634716E-02   .1788968E-02   .1845796E-02
   .1675878E-02   .1305232E-02   .8552748E-03   .4609257E-03   .1974569E-03
   .7187620E-04   .5141438E-04   .1380981E-03   .3177618E-03   .5245417E-03
   .6798697E-03   .7333738E-03   .6733685E-03   .5280117E-03   .3527682E-03
   .2040716E-03   .1184174E-03   .1044093E-03   .1465739E-03   .2173040E-03
   .2866287E-03   .3246780E-03   .3018057E-03   .2125019E-03   .7713002E-04
  -.1049534E-03  -.3584675E-03  -.6785036E-03  -.1027219E-02  -.1356957E-02
  -.1645233E-02  -.1890031E-02  -.2095092E-02  -.2147104E-02  -.1945058E-02
  -.1543684E-02  -.1084218E-02  -.7084331E-03  -.4883018E-03  -.4187345E-03
  -.4310994E-03  -.4272759E-03  -.3281448E-03  -.1132796E-03   .1766334E-03
   .3126597E-03   .4317460E-04  -.6427509E-03  -.1555761E-02  -.2441636E-02
  -.3105816E-02  -.3283487E-02  -.2844554E-02  -.1978195E-02  -.1026388E-02
  -.3015002E-03   .4472168E-04   .1383264E-04  -.2797887E-03  -.6617015E-03
  -.9598274E-03  -.1067884E-02  -.9663837E-03  -.7365359E-03  -.4988736E-03
  -.3359645E-03  -.2727281E-03  -.2882752E-03  -.3389707E-03  -.3408504E-03
  -.2280060E-03  -.1124575E-04   .2529571E-03   .4983303E-03   .6843104E-03
   .8016884E-03   .8706408E-03   .9235309E-03   .1006850E-02   .1151790E-02
   .1356905E-02   .1596257E-02   .1839150E-02   .2061719E-02   .2256103E-02
   .2423170E-02   .2568442E-02   .2647380E-02   .2619811E-02   .2506364E-02
   .2360740E-02   .2209454E-02   .2039006E-02   .1840515E-02   .1628572E-02
   .1438405E-02   .1336672E-02   .1360262E-02   .1475578E-02   .1611492E-02
   .1699536E-02   .1705034E-02   .1631644E-02   .1507092E-02   .1363569E-02
   .1230470E-02   .1130568E-02   .1072306E-02   .1047586E-02   .1014411E-02
   .9152800E-03   .7300921E-03   .4861159E-03   .2401284E-03   .6623279E-04
   .6111949E-05   .3830113E-04   .1065115E-03   .1530136E-03   .1533440E-03
   .1235526E-03   .9189774E-04   .7420953E-04   .7400250E-04   .8685835E-04
   .1050478E-03   .1036147E-03   .9555923E-05  -.2240721E-03  -.5607532E-03
  -.9220306E-03  -.1234048E-02  -.1460939E-02  -.1602076E-02  -.1628433E-02
  -.1488025E-02  -.1198362E-02  -.8510103E-03  -.5592003E-03  -.4546655E-03
  -.6832052E-03  -.1261120E-02  -.2036022E-02  -.2797277E-02  -.3379960E-02
  -.3713311E-02  -.3702685E-02  -.3323934E-02  -.2730946E-02  -.2141312E-02
  -.1736219E-02  -.1581355E-02  -.1643559E-02  -.1845719E-02  -.2182466E-02
  -.2636981E-02  -.3124196E-02  -.3536041E-02  -.3793239E-02  -.3754042E-02
  -.3346249E-02  -.2687488E-02  -.1987678E-02  -.1435744E-02  -.1112058E-02
  -.9888586E-03  -.9746035E-03  -.9653747E-03  -.8844980E-03  -.7018706E-03
  -.4763003E-03  -.2878280E-03  -.1623213E-03  -.8279654E-04  -.1347778E-04
   .7261771E-04   .1828668E-03   .2900587E-03   .3376339E-03   .2934525E-03
   .1747223E-03   .2568683E-04  -.1102070E-03  -.2092316E-03  -.2787145E-03
  -.3653547E-03  -.5118848E-03  -.7154746E-03  -.9122606E-03  -.9871073E-03
  -.8833937E-03  -.6443603E-03  -.3718620E-03  -.1868685E-03  -.2481179E-03
  -.6236886E-03  -.1220168E-02  -.1863076E-02  -.2382460E-02  -.2552835E-02
  -.2250838E-02  -.1597442E-02  -.8370934E-03  -.2063900E-03   .1701737E-03
   .2895923E-03   .2407233E-03   .1374896E-03   .8351248E-04   .1357479E-03
   .2658371E-03   .3534046E-03   .3125019E-03   .1500948E-03  -.6272419E-04
  -.2291334E-03  -.2167584E-03   .3476643E-04   .4549643E-03   .9084388E-03
   .1273059E-02   .1488496E-02   .1564677E-02   .1557643E-02   .1533392E-02
   .1527493E-02   .1554999E-02   .1617818E-02   .1675265E-02   .1577568E-02
   .1216739E-02   .6473430E-03   .3421057E-04  -.4304511E-03  -.6517903E-03
  -.6669408E-03  -.5935908E-03  -.5558432E-03  -.6313935E-03  -.8078945E-03
  -.1018818E-02  -.1207991E-02  -.1351570E-02  -.1452251E-02  -.1525761E-02
  -.1584628E-02  -.1635578E-02  -.1682801E-02  -.1727746E-02  -.1770228E-02
  -.1809223E-02  -.1843896E-02  -.1875335E-02  -.1910117E-02  -.1953312E-02
  -.2003872E-02  -.2056898E-02  -.2107024E-02  -.2150571E-02  -.2182506E-02
  -.2200676E-02  -.2210206E-02  -.2218634E-02  -.2230959E-02  -.2248915E-02
  -.2269928E-02  -.2275018E-02  -.2237555E-02  -.2151046E-02  -.2034142E-02
  -.1914790E-02  -.1814266E-02  -.1740095E-02  -.1685972E-02  -.1627559E-02
  -.1538350E-02  -.1410846E-02  -.1256019E-02  -.1093258E-02  -.9390017E-03
  -.8019674E-03  -.6811361E-03  -.5705179E-03  -.4617234E-03  -.3468082E-03
  -.2201910E-03  -.8297358E-04   .5989168E-04   .2009186E-03   .3301280E-03
   .4010842E-03   .3510150E-03   .1722416E-03  -.7935311E-04  -.3279067E-03
  -.5160092E-03  -.6255542E-03  -.6717101E-03  -.6709953E-03  -.5872677E-03
  -.3966536E-03  -.1415618E-03   .1075073E-03   .2917318E-03   .3935462E-03
   .4487319E-03   .5245453E-03   .6666262E-03   .8799580E-03   .1127043E-02
   .1245288E-02   .1014731E-02   .3925108E-03  -.4650989E-03  -.1321734E-02
  -.1978447E-02  -.2159161E-02  -.1675006E-02  -.6592921E-03   .5378417E-03
   .1552959E-02   .2177937E-02   .2397122E-02   .2342925E-02   .2187671E-02
   .2080608E-02   .2037540E-02   .1960192E-02   .1792728E-02   .1570528E-02
   .1365884E-02   .1233569E-02   .1187124E-02   .1254065E-02   .1470039E-02
   .1805362E-02   .2164870E-02   .2449566E-02   .2603627E-02   .2631451E-02
   .2581287E-02   .2519457E-02   .2499721E-02   .2545288E-02   .2600664E-02
   .2584780E-02   .2473515E-02   .2300502E-02   .2123326E-02   .1987011E-02
   .1910155E-02   .1923549E-02   .2048663E-02   .2252520E-02   .2469219E-02
   .2636206E-02   .2722872E-02   .2734355E-02   .2701912E-02   .2665045E-02
   .2655815E-02   .2691241E-02   .2772745E-02   .2886902E-02   .3013623E-02
   .3131845E-02   .3209010E-02   .3211508E-02   .3139123E-02   .3024587E-02
   .2911398E-02   .2831161E-02   .2790767E-02   .2753966E-02   .2645321E-02
   .2421371E-02   .2105831E-02   .1757290E-02   .1434061E-02   .1170897E-02
   .1001754E-02   .9757393E-03   .1093150E-02   .1283632E-02   .1456687E-02
   .1545780E-02   .1533535E-02   .1444710E-02   .1327758E-02   .1229635E-02
   .1180034E-02   .1183762E-02   .1228441E-02   .1293672E-02   .1361250E-02
   .1417358E-02   .1456215E-02   .1473001E-02   .1453874E-02   .1392191E-02
   .1304425E-02   .1214336E-02   .1142406E-02   .1094810E-02   .1065029E-02
   .1009185E-02   .8702963E-03   .6269695E-03   .2820200E-03  -.1572863E-03
  -.6511150E-03  -.1141968E-02  -.1580101E-02  -.1949601E-02  -.2260234E-02
  -.2526870E-02  -.2603220E-02  -.2351864E-02  -.1837906E-02  -.1240959E-02
  -.7476214E-03  -.4629360E-03  -.4782300E-03  -.8185611E-03  -.1369118E-02
  -.1936848E-02  -.2353379E-02  -.2532763E-02  -.2423848E-02  -.1962441E-02
  -.1191821E-02  -.2962387E-03   .5127996E-03   .1093562E-02   .1421191E-02
   .1565965E-02   .1647028E-02   .1773923E-02   .2003802E-02   .2230998E-02
   .2293184E-02   .2150917E-02   .1884927E-02   .1619484E-02   .1444667E-02
   .1387132E-02   .1413488E-02   .1462652E-02   .1475070E-02   .1415495E-02
   .1278238E-02   .1082489E-02   .8584278E-03   .6374921E-03   .4404339E-03
   .2693385E-03   .7103343E-04  -.2107624E-03  -.5703545E-03  -.9664729E-03
  -.1354940E-02  -.1801590E-02  -.2384050E-02  -.3088673E-02  -.3835241E-02
  -.4513121E-02  -.4792689E-02  -.4418717E-02  -.3521466E-02  -.2441601E-02
  -.1533590E-02  -.9858737E-03  -.8098640E-03  -.8841875E-03  -.1238983E-02
  -.1950083E-02  -.2915129E-02  -.3892487E-02  -.4659150E-02  -.5106924E-02
  -.5256468E-02  -.5038837E-02  -.4433556E-02  -.3626501E-02  -.2880502E-02
  -.2400728E-02  -.2249364E-02  -.2358843E-02  -.2601674E-02  -.2844371E-02
  -.2976799E-02  -.2944678E-02  -.2753710E-02  -.2455199E-02  -.2117724E-02
  -.1802485E-02  -.1546548E-02  -.1359288E-02  -.1235718E-02  -.1158205E-02
  -.1099082E-02  -.1031208E-02  -.9385503E-03  -.8181254E-03  -.6786814E-03
  -.5338078E-03  -.3966385E-03  -.2659007E-03  -.1309075E-03   .1545765E-04
   .1684329E-03   .3203085E-03   .4593976E-03   .5500706E-03   .4752808E-03
   .1623077E-03  -.3255709E-03  -.8546360E-03  -.1301574E-02  -.1606420E-02
  -.1768551E-02  -.1733324E-02  -.1406320E-02  -.8156865E-03  -.1219714E-03
   .4884094E-03   .8962084E-03   .1070789E-02   .1023909E-02   .8246719E-03
   .5994611E-03   .4676485E-03   .4958704E-03   .6810013E-03   .9688347E-03
   .1283478E-02   .1559848E-02   .1758938E-02   .1870478E-02   .1909713E-02
   .1910087E-02   .1906888E-02   .1925563E-02   .1974803E-02   .2050012E-02
   .2138232E-02   .2226022E-02   .2302544E-02   .2353671E-02   .2359348E-02
   .2315371E-02   .2240311E-02   .2162428E-02   .2104345E-02   .2075900E-02
   .2073776E-02   .2093332E-02   .2132995E-02   .2184306E-02   .2232792E-02
   .2265635E-02   .2276632E-02   .2257664E-02   .2116336E-02   .1747723E-02
   .1173195E-02   .5074499E-03  -.1084572E-03  -.5685588E-03  -.6375275E-03
  -.1653091E-03   .7016451E-03   .1665600E-02   .2442850E-02   .2892860E-02
   .3021552E-02   .2874433E-02   .2436054E-02   .1765213E-02   .1037652E-02
   .4464929E-03   .1031894E-03   .7085658E-05   .6504567E-04   .1529154E-03
   .1695982E-03   .1462615E-03   .1792776E-03   .2988092E-03   .4642254E-03
   .6092070E-03   .6851079E-03   .6717177E-03   .5869171E-03   .4796418E-03
   .4028967E-03   .3900173E-03   .4475157E-03   .5567026E-03   .6823294E-03
   .7857408E-03   .8471549E-03   .8676911E-03   .8635871E-03   .8530593E-03
   .8510308E-03   .8622262E-03   .8786790E-03   .8683877E-03   .8032141E-03
   .6572033E-03   .4077809E-03   .7519575E-04  -.2842960E-03  -.6131137E-03
  -.8788024E-03  -.1082821E-02  -.1245422E-02  -.1369130E-02  -.1369863E-02
  -.1186811E-02  -.8712941E-03  -.5322418E-03  -.2693379E-03  -.1269443E-03
  -.9360967E-04  -.1192337E-03  -.1426190E-03  -.1147277E-03  -.1664784E-04
   .1139156E-03   .2043442E-03   .2166079E-03   .1622475E-03   .7429545E-04
  -.9274887E-04  -.4420946E-03  -.9958168E-03  -.1667373E-02  -.2324314E-02
  -.2786770E-02  -.2844914E-02  -.2452547E-02  -.1789056E-02  -.1119259E-02
  -.6558222E-03  -.4787881E-03  -.5421698E-03  -.7250862E-03  -.9234146E-03
  -.1066733E-02  -.1109059E-02  -.1037477E-02  -.8749608E-03  -.6874716E-03
  -.5489736E-03  -.4926637E-03  -.5100842E-03  -.5681165E-03  -.6333379E-03
  -.6827224E-03  -.7065083E-03  -.6878313E-03  -.5929644E-03  -.4144034E-03
  -.1891572E-03   .3064876E-04   .2041686E-03   .3193162E-03   .3880864E-03
   .4391765E-03   .5010379E-03   .5923758E-03   .7168532E-03   .8659554E-03
   .1020821E-02   .1127518E-02   .1093582E-02   .8812379E-03   .5464542E-03
   .1888049E-03  -.1063298E-03  -.3000763E-03  -.3986297E-03  -.3832449E-03
  -.2134681E-03   .8985415E-04   .4377638E-03   .7324997E-03   .9144219E-03
   .9810252E-03   .9730685E-03   .9502164E-03   .9613492E-03   .1006489E-02
   .9882914E-03   .8220292E-03   .5291198E-03   .1919246E-03  -.1020006E-03
  -.2999490E-03  -.3302610E-03  -.1489044E-03   .1879162E-03   .5591688E-03
   .8488313E-03   .9967019E-03   .1007324E-02   .9145673E-03   .7652272E-03
   .6182078E-03   .5233246E-03   .5050779E-03   .5586367E-03   .6577878E-03
   .7633923E-03   .8284121E-03   .8247197E-03   .7592572E-03   .6593956E-03
   .5560858E-03   .4502593E-03   .3310205E-03   .1997329E-03   .6653225E-04
  -.5887527E-04  -.1712732E-03  -.2727820E-03  -.3701398E-03  -.4741359E-03
  -.6050949E-03  -.7739181E-03  -.9715661E-03  -.1177412E-02  -.1368845E-02
  -.1507007E-02  -.1533838E-02  -.1432644E-02  -.1251754E-02  -.1064747E-02
  -.9310087E-03  -.8727693E-03  -.8774579E-03  -.9112174E-03  -.9375761E-03
  -.9317687E-03  -.8910621E-03  -.8316686E-03  -.7708719E-03  -.7181949E-03
  -.6747033E-03  -.6374856E-03  -.6026262E-03  -.5676849E-03  -.5318001E-03
  -.4967423E-03  -.4662417E-03  -.4464370E-03  -.4403158E-03  -.4439347E-03
  -.4502712E-03  -.4534838E-03  -.4509727E-03  -.4471527E-03  -.4544993E-03
  -.4802020E-03  -.5203150E-03  -.5655437E-03  -.6059835E-03  -.6376821E-03
  -.6601185E-03  -.6774359E-03  -.6930929E-03  -.6987599E-03  -.6823417E-03
  -.6445137E-03  -.5968799E-03  -.5532780E-03  -.5229570E-03  -.5060126E-03
  -.4981037E-03  -.4919656E-03  -.4776123E-03  -.4418159E-03  -.3774450E-03
  -.2920202E-03  -.1996712E-03  -.1148398E-03  -.4452984E-04   .1078436E-04
   .5655102E-04   .9956187E-04   .1430214E-03   .1598136E-03   .8726169E-04
  -.1031608E-03  -.3743732E-03  -.6585561E-03  -.8977125E-03  -.1065630E-02
  -.1162446E-02  -.1128416E-02  -.8969189E-03  -.5040776E-03  -.5977075E-04
   .3185065E-03   .5672752E-03   .6852303E-03   .7245756E-03   .7503006E-03
   .8089170E-03   .8077763E-03   .5729065E-03   .5103300E-04  -.6437191E-03
  -.1336300E-02  -.1885700E-02  -.2202885E-02  -.2170646E-02  -.1773553E-02
  -.1177418E-02  -.6117893E-03  -.2525341E-03  -.1588408E-03  -.2852721E-03
  -.5399858E-03  -.8167553E-03  -.1018207E-02  -.1089637E-02  -.1037077E-02
  -.9338272E-03  -.8620594E-03  -.8566962E-03  -.9087024E-03  -.9461780E-03
  -.8904924E-03  -.7271758E-03  -.5014635E-03  -.2789043E-03  -.1134447E-03
  -.2847772E-04  -.1142885E-04  -.2691130E-04  -.3513765E-04  -.9291757E-05
   .6013688E-04   .1657081E-03   .2897670E-03   .4143736E-03   .5256897E-03
   .6183636E-03   .6929103E-03   .7561856E-03   .8145122E-03   .8741771E-03
   .9360486E-03   .9942831E-03   .1042249E-02   .1081180E-02   .1114401E-02
   .1141037E-02   .1086605E-02   .8827549E-03   .5549183E-03   .1996499E-03
  -.8347494E-04  -.2539804E-03  -.3290561E-03  -.3575151E-03  -.3604865E-03
  -.2581796E-03   .1650741E-04   .4162535E-03   .8285079E-03   .1134939E-02
   .1287013E-02   .1309566E-02   .1272698E-02   .1180810E-02   .1021825E-02
   .8331373E-03   .6779480E-03   .6177377E-03   .6728141E-03   .8099199E-03
   .9681102E-03   .1089757E-02   .1142816E-02   .1126208E-02   .1068276E-02
   .1004435E-02   .9589193E-03   .9402683E-03   .9427908E-03   .9397594E-03
   .8830516E-03   .7500246E-03   .5653771E-03   .4083432E-03   .3705229E-03
   .4782681E-03   .6849291E-03   .9099057E-03   .1086131E-02   .1188933E-02
   .1232686E-02   .1246988E-02   .1262378E-02   .1300758E-02   .1370248E-02
   .1467666E-02   .1582645E-02   .1698733E-02   .1798753E-02   .1873520E-02
   .1927279E-02   .1971401E-02   .2017039E-02   .2069688E-02   .2117320E-02
   .2142242E-02   .2141634E-02   .2124619E-02   .2106107E-02   .2096096E-02
   .2097209E-02   .2099454E-02   .2086924E-02   .2049109E-02   .1979666E-02
   .1854692E-02   .1661989E-02   .1426062E-02   .1186645E-02   .9768210E-03
   .8133116E-03   .7122022E-03   .6890486E-03   .7278093E-03   .7853805E-03
   .8168929E-03   .7983107E-03   .7495112E-03   .7137533E-03   .7158685E-03
   .7568923E-03   .8213872E-03   .8913391E-03   .9547950E-03   .1007303E-02
   .1037335E-02   .1083180E-02   .1143313E-02   .1221398E-02   .1313026E-02
   .1409955E-02   .1504338E-02   .1589288E-02   .1648652E-02   .1632991E-02
   .1510335E-02   .1310496E-02   .1090592E-02   .9068222E-03   .7999217E-03
   .7957093E-03   .8802304E-03   .1003164E-02   .1107165E-02   .1152347E-02
   .1130223E-02   .1057054E-02   .9634092E-03   .8790969E-03   .8204903E-03
   .7733122E-03   .6606842E-03   .4233600E-03   .8292999E-04  -.2893722E-03
  -.5981688E-03  -.7679576E-03  -.7936965E-03  -.7351576E-03  -.6758496E-03
  -.6783198E-03  -.7672439E-03  -.9262541E-03  -.1096637E-02  -.1204205E-02
  -.1214725E-02  -.1144349E-02  -.1038000E-02  -.9393095E-03  -.8754613E-03
  -.8577573E-03  -.8895765E-03  -.9626104E-03  -.1101185E-02  -.1333685E-02
  -.1639189E-02  -.1961478E-02  -.2246716E-02  -.2475195E-02  -.2658613E-02
  -.2820432E-02  -.2986413E-02  -.3173317E-02  -.3389222E-02  -.3627427E-02
  -.3856551E-02  -.3988582E-02  -.3963667E-02  -.3813874E-02  -.3620501E-02
  -.3465600E-02  -.3392915E-02  -.3429330E-02  -.3568092E-02  -.3755397E-02
  -.3926421E-02  -.4032101E-02  -.4058360E-02  -.4017789E-02  -.3903075E-02
  -.3688784E-02  -.3388161E-02  -.3058064E-02  -.2762681E-02  -.2539976E-02
  -.2393245E-02  -.2303389E-02  -.2303566E-02  -.2464918E-02  -.2785615E-02
  -.3178640E-02  -.3533764E-02  -.3773992E-02  -.3848286E-02  -.3716155E-02
  -.3407091E-02  -.3030418E-02  -.2707635E-02  -.2520724E-02  -.2493826E-02
  -.2609884E-02  -.2809449E-02  -.3012361E-02  -.3150414E-02  -.3191129E-02
  -.3141200E-02  -.3033894E-02  -.2912563E-02  -.2812186E-02  -.2748203E-02
  -.2718120E-02  -.2712470E-02  -.2716239E-02  -.2706935E-02  -.2663297E-02
  -.2583475E-02  -.2481459E-02  -.2376563E-02  -.2282094E-02  -.2200175E-02
  -.2118411E-02  -.2024415E-02  -.1917507E-02  -.1802749E-02  -.1687607E-02
  -.1576896E-02  -.1470501E-02  -.1360430E-02  -.1242003E-02  -.1115380E-02
  -.9860043E-03  -.8591315E-03  -.7389199E-03  -.6263062E-03  -.5200346E-03
  -.4173595E-03  -.3271430E-03  -.2567076E-03  -.2026787E-03  -.1551395E-03
  -.1023534E-03  -.3014275E-04   .7361914E-04   .2070527E-03   .3540452E-03
   .4941546E-03   .6138534E-03   .7085074E-03   .7820169E-03   .8345382E-03
   .8565165E-03   .8471145E-03   .8227225E-03   .8058606E-03   .8111098E-03
   .8515590E-03   .9405971E-03   .1075280E-02   .1229070E-02   .1370927E-02
   .1478054E-02   .1545767E-02   .1584240E-02   .1610560E-02   .1630827E-02
   .1644549E-02   .1655771E-02   .1672034E-02   .1698644E-02   .1735895E-02
   .1772480E-02   .1787270E-02   .1768884E-02   .1723003E-02   .1665060E-02
   .1610581E-02   .1568413E-02   .1539459E-02   .1516623E-02   .1490801E-02
   .1455957E-02   .1411718E-02   .1360182E-02   .1295562E-02   .1201514E-02
   .1072218E-02   .9207519E-03   .7697657E-03   .6371437E-03   .5296117E-03
   .4440435E-03   .3720347E-03   .3038449E-03   .2307340E-03   .1471968E-03
   .5296765E-04  -.4717507E-04  -.1480339E-03  -.2449833E-03  -.3347327E-03
  -.4163151E-03  -.4885084E-03  -.5438927E-03  -.5783924E-03  -.5986505E-03
  -.6148933E-03  -.6369916E-03  -.6682277E-03  -.7073107E-03  -.7447719E-03
  -.7700066E-03  -.7770791E-03  -.7662310E-03  -.7110410E-03  -.5704458E-03
  -.3422044E-03  -.6928526E-04   .1936367E-03   .4066854E-03   .5522595E-03
   .5696848E-03   .3741686E-03  -.2376213E-04  -.5146924E-03  -.9628159E-03
  -.1279073E-02  -.1444541E-02  -.1496844E-02  -.1441619E-02  -.1271536E-02
  -.1035467E-02  -.8145490E-03  -.6792522E-03  -.6542413E-03  -.7182083E-03
  -.8211749E-03  -.9090013E-03  -.9429701E-03  -.9097809E-03  -.8192534E-03
  -.6954735E-03  -.5645653E-03  -.4443618E-03  -.3247786E-03  -.1878910E-03
  -.3409899E-04   .1251143E-03   .2759699E-03   .4106252E-03   .5280928E-03
   .6349607E-03   .7379611E-03   .8427539E-03   .9502309E-03   .1038641E-02
   .1085584E-02   .1096699E-02   .1092272E-02   .1095838E-02   .1120109E-02
   .1168213E-02   .1255077E-02   .1396458E-02   .1578239E-02   .1768650E-02
   .1934833E-02   .2076379E-02   .2210359E-02   .2351339E-02   .2499406E-02
   .2631058E-02   .2669854E-02   .2567111E-02   .2359174E-02   .2125226E-02
   .1942813E-02   .1877116E-02   .1965764E-02   .2180257E-02   .2440486E-02
   .2662103E-02   .2792543E-02   .2823737E-02   .2782463E-02   .2692283E-02
   .2521662E-02   .2247663E-02   .1913114E-02   .1587736E-02   .1330580E-02
   .1159761E-02   .1058397E-02   .9910080E-03   .9664419E-03   .1000447E-02
   .1067653E-02   .1123597E-02   .1133575E-02   .1086378E-02   .9948307E-03
   .8834351E-03   .7800656E-03   .7057171E-03   .6699907E-03   .6814321E-03
   .7469051E-03   .8543938E-03   .9759950E-03   .1083621E-02   .1159064E-02
   .1197617E-02   .1205916E-02   .1200234E-02   .1197442E-02   .1209820E-02
   .1240328E-02   .1279916E-02   .1308648E-02   .1313542E-02   .1296438E-02
   .1268453E-02   .1241597E-02   .1222811E-02   .1208415E-02   .1184201E-02
   .1140586E-02   .1079623E-02   .1011170E-02   .9452659E-03   .8877904E-03
   .8384799E-03   .7917556E-03   .7422076E-03   .6876274E-03   .6284233E-03
   .5664229E-03   .4927311E-03   .3938588E-03   .2683955E-03   .1298580E-03
  -.3660389E-05  -.1194782E-03  -.2107367E-03  -.2490378E-03  -.1950901E-03
  -.5147760E-04   .1357338E-03   .3079694E-03   .4265643E-03   .4818855E-03
   .4886003E-03   .4395524E-03   .3311417E-03   .1937625E-03   .6998291E-04
  -.8034588E-05  -.3111900E-04  -.9138130E-05   .6645260E-04   .2002355E-03
   .3628732E-03   .5138545E-03   .6204746E-03   .6741053E-03   .6847976E-03
   .6656906E-03   .6014408E-03   .4836675E-03   .3379188E-03   .2024947E-03
   .1072289E-03   .6669328E-04   .8291229E-04   .1387674E-03   .2027034E-03
   .2456443E-03   .2509356E-03   .2193128E-03   .1630905E-03   .9910253E-04
   .4109317E-04  -.2203720E-05  -.2839642E-04  -.4030839E-04  -.4393098E-04
  -.4579000E-04  -.5071956E-04  -.6151763E-04  -.7993616E-04  -.1266307E-03
  -.2238754E-03  -.3661133E-03  -.5257298E-03  -.6640111E-03  -.7469117E-03
  -.7647509E-03  -.7389951E-03  -.7035282E-03  -.6879772E-03  -.7057878E-03
  -.7493266E-03  -.7858914E-03  -.7864212E-03  -.7480368E-03  -.6862754E-03
  -.6209727E-03  -.5671939E-03  -.5293505E-03  -.5042943E-03  -.4835055E-03
  -.4586264E-03  -.4184656E-03  -.3554889E-03  -.2729889E-03  -.1828432E-03
  -.9742998E-04  -.2502513E-04   .3205023E-04   .7066501E-04   .8681060E-04
   .8479353E-04   .7671352E-04   .7447735E-04   .8578939E-04   .1140839E-03
   .1658685E-03   .2409425E-03   .3267384E-03   .4073631E-03   .4704475E-03
   .5130250E-03   .5394197E-03   .5582774E-03   .5767277E-03   .5855441E-03
   .5736188E-03   .5449048E-03   .5109497E-03   .4853937E-03   .4773222E-03
   .4999153E-03   .5552690E-03   .6293273E-03   .7006611E-03   .7531709E-03
   .7805755E-03   .7874698E-03   .7847073E-03   .7868196E-03   .8072796E-03
   .8485860E-03   .9041687E-03   .9631250E-03   .1015599E-02   .1057282E-02
   .1087625E-02   .1110778E-02   .1131091E-02   .1152521E-02   .1178142E-02
   .1222624E-02   .1297906E-02   .1395672E-02   .1498554E-02   .1588112E-02
   .1650128E-02   .1679212E-02   .1683567E-02   .1679176E-02   .1680685E-02
   .1695965E-02   .1720935E-02   .1704112E-02   .1598515E-02   .1414640E-02
   .1198076E-02   .9996742E-03   .8573118E-03   .8028750E-03   .8370954E-03
   .9196576E-03   .9975487E-03   .1030177E-02   .1003493E-02   .9280025E-03
   .8269377E-03   .7085291E-03   .5757621E-03   .4431947E-03   .3290664E-03
   .2637635E-03   .2748742E-03   .3571113E-03   .4728570E-03   .5772523E-03
   .6393565E-03   .6482409E-03   .6043418E-03   .5230192E-03   .4313611E-03
   .3562798E-03   .3128637E-03   .3014018E-03   .3056413E-03   .3039267E-03
   .2838805E-03   .2446191E-03   .1938279E-03   .1417906E-03   .9597615E-04
   .5822997E-04   .2649412E-04  -.2777730E-05  -.3288607E-04  -.6553689E-04
  -.1006890E-03  -.1378577E-03  -.1754709E-03  -.2122858E-03  -.2505622E-03
  -.2962736E-03  -.3522431E-03  -.4146728E-03  -.4787006E-03  -.5418068E-03
  -.6021011E-03  -.6580955E-03  -.7091301E-03  -.7559820E-03  -.8001971E-03
  -.8428612E-03  -.8786264E-03  -.8940106E-03  -.8836610E-03  -.8563650E-03
  -.8270753E-03  -.8081008E-03  -.8042372E-03  -.8140650E-03  -.8447285E-03
  -.9037134E-03  -.9836863E-03  -.1065950E-02  -.1127497E-02  -.1139327E-02
  -.1091006E-02  -.1002143E-02  -.9065629E-03  -.8330912E-03  -.7953330E-03
  -.7901331E-03  -.8041212E-03  -.8220741E-03  -.8449367E-03  -.8818364E-03
  -.9308937E-03  -.9812129E-03  -.1021316E-02  -.1045446E-02  -.1054087E-02
  -.1040458E-02  -.9977627E-03  -.9342480E-03  -.8679734E-03  -.8161098E-03
  -.7868133E-03  -.7780665E-03  -.7810096E-03  -.7868389E-03  -.8071765E-03
  -.8558119E-03  -.9248624E-03  -.9964657E-03  -.1052306E-02  -.1079733E-02
  -.1063382E-02  -.1002001E-02  -.9165438E-03  -.8353086E-03  -.7795315E-03
  -.7560710E-03  -.7583402E-03  -.7733088E-03  -.7923575E-03  -.8177376E-03
  -.8503831E-03  -.8839859E-03  -.9101528E-03  -.9239455E-03  -.9252230E-03
  -.9178520E-03  -.8971826E-03  -.8572904E-03  -.8029842E-03  -.7468290E-03
  -.7010656E-03  -.6718133E-03  -.6573829E-03  -.6513170E-03  -.6468145E-03
  -.6520582E-03  -.6762006E-03  -.7144228E-03  -.7543424E-03  -.7837021E-03
  -.7970602E-03  -.7956619E-03  -.7793323E-03  -.7416713E-03  -.6832634E-03
  -.6166844E-03  -.5575175E-03  -.5158181E-03  -.4929862E-03  -.4831857E-03
  -.4780795E-03  -.4760584E-03  -.4853421E-03  -.5098229E-03  -.5424165E-03
  -.5714960E-03  -.5846909E-03  -.5721456E-03  -.5346555E-03  -.4848925E-03
  -.4384757E-03  -.4065137E-03  -.3922248E-03  -.3919389E-03  -.3983162E-03
  -.4063215E-03  -.4143164E-03  -.4209642E-03  -.4243150E-03  -.4230567E-03
  -.4173423E-03  -.4088074E-03  -.3995648E-03  -.3914438E-03  -.3832832E-03
  -.3721561E-03  -.3572245E-03  -.3402521E-03  -.3238956E-03  -.3101495E-03
  -.2993936E-03  -.2907819E-03  -.2822006E-03  -.2712854E-03  -.2569287E-03
  -.2400084E-03  -.2223056E-03  -.2058521E-03  -.1944708E-03  -.1914155E-03
  -.1953735E-03  -.2018830E-03  -.2026955E-03  -.1922402E-03  -.1717928E-03
  -.1470728E-03  -.1241666E-03  -.1071103E-03  -.9667283E-04  -.9132644E-04
  -.8820225E-04  -.8479630E-04  -.7940736E-04  -.7189544E-04  -.6367746E-04
  -.6540993E-04  -.8580643E-04  -.1210107E-03  -.1604281E-03  -.1934162E-03
  -.2141316E-03  -.2193075E-03  -.2062027E-03  -.1780745E-03  -.1449253E-03
  -.1171493E-03  -.1010629E-03  -.9698993E-04  -.1010093E-03  -.1087978E-03
  -.1185577E-03  -.1284673E-03  -.1357689E-03  -.1382052E-03  -.1352583E-03
  -.1281814E-03  -.1192022E-03  -.1104423E-03  -.1021884E-03  -.9099489E-04
  -.7429114E-04  -.5377773E-04  -.3306926E-04  -.1541926E-04  -.2512631E-05
   .2638886E-05  -.1692315E-05  -.1240695E-04  -.2369506E-04  -.3037472E-04
  -.3004047E-04  -.2265199E-04  -.8281316E-05   .1136488E-04   .3218435E-04
   .5008794E-04   .6274436E-04   .7021614E-04   .7426866E-04   .7728866E-04
   .8130465E-04   .8731287E-04   .9521297E-04   .1027144E-03   .1076593E-03
   .1100934E-03   .1113764E-03   .1134059E-03   .1176950E-03   .1245033E-03
   .1327657E-03   .1409957E-03   .1480372E-03   .1534738E-03   .1575821E-03
   .1617018E-03   .1678392E-03   .1767572E-03   .1873415E-03   .1977455E-03
   .2064859E-03   .2128815E-03   .2161813E-03   .2161696E-03   .2140550E-03
   .2117054E-03   .2106097E-03   .2113303E-03   .2135235E-03   .2163260E-03
   .2188768E-03   .2208479E-03   .2223861E-03   .2235973E-03   .2244082E-03
   .2247074E-03   .2244859E-03   .2238399E-03   .2229239E-03   .2219005E-03
   .2210910E-03   .2206508E-03   .2203677E-03   .2198773E-03   .2188666E-03
   .2171991E-03   .2148644E-03   .2119967E-03   .2088080E-03   .2054800E-03
   .2021185E-03   .1987338E-03   .1952706E-03   .1916367E-03   .1877710E-03
   .1836709E-03   .1793798E-03   .1749538E-03   .1704407E-03   .1658696E-03
   .1612537E-03   .1565964E-03   .1518817E-03   .1471028E-03   .1422786E-03
   .1374423E-03   .1326230E-03   .1278373E-03   .1230812E-03   .1183306E-03
   .1135856E-03   .1088777E-03   .1041828E-03   .9951412E-04   .9496627E-04
   .9061992E-04   .8649921E-04   .8257828E-04   .7881696E-04   .7513261E-04
   .7142827E-04   .6765486E-04   .6382137E-04   .5996946E-04   .5614113E-04
   .5236347E-04   .4864019E-04   .4495533E-04   .4128723E-04   .3761224E-04
