# Supplementary material for: Earthquake Response Analysis of Tall Reinforced Concrete Chimneys considering Eccentricity
Source: Hindawi journal article supplement (doi:10.1155/2020/1417969), 2020-03-11
Supplement: f1 [file 1417969.f1.zip › 1417969.f1/Four kinds of earthquake records/Stiff soil/BORREGO B-ELC000.txt]

PEER STRONG MOTION DATABASE RECORD. PROCESSING BY PACIFIC ENGINEERING.
BORREGO MOUNTAIN 10/21/42 1622, EL CENTRO ARRAY #9, 000 (USGS STATION 117)
ACCELERATION TIME HISTORY IN UNITS OF G. FILTER POINTS: HP=0.1 Hz LP=15.0 Hz
NPTS=  8000, DT= .00500 SEC
   .1570948E-03   .1721317E-03   .1753055E-03   .1771466E-03   .1791831E-03
   .1810911E-03   .1831071E-03   .1845248E-03   .1844475E-03   .1825867E-03
   .1766549E-03   .1669256E-03   .1529365E-03   .1350771E-03   .1186762E-03
   .1078553E-03   .1066945E-03   .1172605E-03   .1395388E-03   .1737949E-03
   .2168035E-03   .2627195E-03   .3024113E-03   .3276115E-03   .3343494E-03
   .3228832E-03   .2946845E-03   .2562284E-03   .2170278E-03   .1841812E-03
   .1624261E-03   .1535813E-03   .1651848E-03   .2049984E-03   .2713208E-03
   .3542540E-03   .4388368E-03   .5143261E-03   .5749342E-03   .6188184E-03
   .6485524E-03   .6659727E-03   .6749219E-03   .6798190E-03   .6856512E-03
   .6957107E-03   .7114079E-03   .7327969E-03   .7594772E-03   .7882366E-03
   .8173756E-03   .8453131E-03   .8709541E-03   .8953125E-03   .9176765E-03
   .9399525E-03   .9613401E-03   .9817752E-03   .9990878E-03   .1012310E-02
   .1004761E-02   .9354038E-03   .7618335E-03   .4836819E-03   .1395141E-03
  -.2194814E-03  -.5439578E-03  -.7924525E-03  -.9478526E-03  -.1016623E-02
  -.1025642E-02  -.1012987E-02  -.1022803E-02  -.1095048E-02  -.1300663E-02
  -.1724337E-02  -.2348841E-02  -.3044879E-02  -.3651012E-02  -.4032027E-02
  -.4117043E-02  -.3903204E-02  -.3447132E-02  -.2839448E-02  -.2177381E-02
  -.1539499E-02  -.9763977E-03  -.5276715E-03  -.2193265E-03  -.4777418E-04
   .1566505E-04   .1569296E-04  -.5099662E-05  -.6706473E-05   .3581335E-04
   .1345968E-03   .2892633E-03   .5358428E-03   .9277347E-03   .1485492E-02
   .2195785E-02   .3020943E-02   .3908627E-02   .4784572E-02   .5543286E-02
   .6086132E-02   .6274909E-02   .5967340E-02   .5138342E-02   .3882661E-02
   .2385006E-02   .8697568E-03  -.4652662E-03  -.1470442E-02  -.2050171E-02
  -.2194902E-02  -.1924328E-02  -.1276614E-02  -.2948676E-03   .9658439E-03
   .2407721E-02   .3851746E-02   .5093355E-02   .5992748E-02   .6472821E-02
   .6546159E-02   .6311475E-02   .5918108E-02   .5518308E-02   .5236457E-02
   .5150663E-02   .5319017E-02   .5744196E-02   .6356004E-02   .7047818E-02
   .7715411E-02   .8276494E-02   .8672542E-02   .8872036E-02   .8789601E-02
   .8295199E-02   .7322794E-02   .5867467E-02   .3999367E-02   .1834629E-02
  -.5610185E-03  -.3387758E-02  -.6707269E-02  -.1019304E-01  -.1343298E-01
  -.1606611E-01  -.1791350E-01  -.1901151E-01  -.1956526E-01  -.1983840E-01
  -.2007802E-01  -.2046124E-01  -.2107043E-01  -.2188538E-01  -.2281939E-01
  -.2374903E-01  -.2450811E-01  -.2492339E-01  -.2483272E-01  -.2414113E-01
  -.2287470E-01  -.2106315E-01  -.1863149E-01  -.1553485E-01  -.1190434E-01
  -.7980695E-02  -.4082146E-02  -.4921576E-03   .2631067E-02   .5221695E-02
   .7282926E-02   .8915161E-02   .1031823E-01   .1175204E-01   .1342069E-01
   .1535227E-01   .1742169E-01   .1948053E-01   .2140214E-01   .2310970E-01
   .2450975E-01   .2550265E-01   .2597001E-01   .2572898E-01   .2445798E-01
   .2191602E-01   .1826621E-01   .1405598E-01   .9915888E-02   .6305405E-02
   .3342315E-02   .8313162E-03  -.1520877E-02  -.3839300E-02  -.6106400E-02
  -.8270544E-02  -.1027200E-01  -.1198682E-01  -.1329411E-01  -.1415781E-01
  -.1462647E-01  -.1480812E-01  -.1483043E-01  -.1477153E-01  -.1465427E-01
  -.1446845E-01  -.1418505E-01  -.1357542E-01  -.1231185E-01  -.1011422E-01
  -.6785444E-02  -.2353668E-02   .2893631E-02   .8509508E-02   .1375885E-01
   .1781894E-01   .2012750E-01   .2051039E-01   .1923685E-01   .1660735E-01
   .1290310E-01   .8538192E-02   .4043752E-02  -.9433301E-04  -.3545492E-02
  -.6071928E-02  -.7567523E-02  -.8098456E-02  -.7876119E-02  -.7227921E-02
  -.6406749E-02  -.5521068E-02  -.4497108E-02  -.3189194E-02  -.1505167E-02
   .6321467E-03   .3260590E-02   .6142485E-02   .8877196E-02   .1115483E-01
   .1281827E-01   .1387297E-01   .1435617E-01   .1431025E-01   .1379688E-01
   .1280440E-01   .1134198E-01   .9548008E-02   .7653259E-02   .5572042E-02
   .3274800E-02   .1016880E-02  -.9823435E-03  -.2599799E-02  -.3857783E-02
  -.4837086E-02  -.5651435E-02  -.6303348E-02  -.6663116E-02  -.6523744E-02
  -.5708775E-02  -.4146457E-02  -.1882369E-02   .9000428E-03   .3731597E-02
   .6001116E-02   .7233374E-02   .7117968E-02   .5398824E-02   .2281245E-02
  -.1569561E-02  -.5430835E-02  -.8713574E-02  -.1099911E-01  -.1210393E-01
  -.1211695E-01  -.1126719E-01  -.9857437E-02  -.8230005E-02  -.6694970E-02
  -.5472367E-02  -.4667024E-02  -.4305326E-02  -.4356722E-02  -.4721458E-02
  -.5287290E-02  -.5969735E-02  -.6697109E-02  -.7401352E-02  -.8025903E-02
  -.8537433E-02  -.8928786E-02  -.9179107E-02  -.9237387E-02  -.9071871E-02
  -.8647037E-02  -.7937390E-02  -.6984809E-02  -.5873595E-02  -.4708869E-02
  -.3596927E-02  -.2658324E-02  -.1992612E-02  -.1679973E-02  -.1774429E-02
  -.2273236E-02  -.3181442E-02  -.4484556E-02  -.6093350E-02  -.7817408E-02
  -.9359595E-02  -.1044238E-01  -.1082129E-01  -.1019066E-01  -.8271055E-02
  -.5028278E-02  -.7459871E-03   .4098939E-02   .8882239E-02   .1286859E-01
   .1549578E-01   .1658143E-01   .1620580E-01   .1460812E-01   .1209816E-01
   .9031167E-02   .5829528E-02   .2896365E-02   .5029395E-03  -.1188353E-02
  -.2090511E-02  -.2254087E-02  -.1802483E-02  -.8904644E-03   .3708392E-03
   .1979514E-02   .3923425E-02   .6051603E-02   .8017848E-02   .9434643E-02
   .1001368E-01   .9665631E-02   .8436388E-02   .6449671E-02   .3934713E-02
   .1177801E-02  -.1541722E-02  -.4006995E-02  -.6106794E-02  -.7844458E-02
  -.9307106E-02  -.1062701E-01  -.1195070E-01  -.1340877E-01  -.1512499E-01
  -.1715846E-01  -.1944427E-01  -.2169725E-01  -.2353560E-01  -.2448693E-01
  -.2403990E-01  -.2195816E-01  -.1842711E-01  -.1399593E-01  -.9325120E-02
  -.4926649E-02  -.8315735E-03   .3320524E-02   .7689355E-02   .1214413E-01
   .1626333E-01   .1949607E-01   .2150082E-01   .2221610E-01   .2185567E-01
   .2080422E-01   .1946640E-01   .1813898E-01   .1700048E-01   .1612922E-01
   .1555713E-01   .1525263E-01   .1519159E-01   .1536448E-01   .1579922E-01
   .1654180E-01   .1757431E-01   .1881319E-01   .2013819E-01   .2139952E-01
   .2244521E-01   .2307503E-01   .2310764E-01   .2250749E-01   .2119627E-01
   .1904970E-01   .1600523E-01   .1198876E-01   .7082018E-02   .1909278E-02
  -.2674635E-02  -.6087418E-02  -.8151613E-02  -.8957438E-02  -.8737971E-02
  -.7855668E-02  -.6718588E-02  -.5694559E-02  -.5068628E-02  -.5090767E-02
  -.5908059E-02  -.7464947E-02  -.9563424E-02  -.1192626E-01  -.1427735E-01
  -.1639494E-01  -.1816277E-01  -.1963941E-01  -.2087288E-01  -.2170238E-01
  -.2189074E-01  -.2067781E-01  -.1714736E-01  -.1105798E-01  -.2859203E-02
   .6386672E-02   .1534184E-01   .2291246E-01   .2858119E-01   .3231545E-01
   .3417288E-01   .3419936E-01   .3265470E-01   .2950827E-01   .2458912E-01
   .1810008E-01   .1065842E-01   .3064429E-02  -.3728584E-02  -.8893948E-02
  -.1215291E-01  -.1365514E-01  -.1378345E-01  -.1293759E-01  -.1152494E-01
  -.9818797E-02  -.7966613E-02  -.6067744E-02  -.4110929E-02  -.1795971E-02
   .1275830E-02   .5244334E-02   .9836590E-02   .1433453E-01   .1799428E-01
   .2040217E-01   .2149637E-01   .2147384E-01   .2068670E-01   .1945004E-01
   .1797728E-01   .1643973E-01   .1494201E-01   .1349415E-01   .1203196E-01
   .1047996E-01   .8759856E-02   .6681059E-02   .3981432E-02   .5777731E-03
  -.3334183E-02  -.7401676E-02  -.1130438E-01  -.1472177E-01  -.1734605E-01
  -.1893640E-01  -.1940413E-01  -.1875667E-01  -.1711655E-01  -.1475515E-01
  -.1203348E-01  -.9321031E-02  -.6915965E-02  -.5006163E-02  -.3779599E-02
  -.3360353E-02  -.3768272E-02  -.4958288E-02  -.6738042E-02  -.8697692E-02
  -.1036191E-01  -.1141280E-01  -.1172153E-01  -.1130939E-01  -.1032002E-01
  -.8972691E-02  -.7478450E-02  -.6010524E-02  -.4695523E-02  -.3595501E-02
  -.2703960E-02  -.1967763E-02  -.1304132E-02  -.5893495E-03   .3206610E-03
   .1512908E-02   .3002061E-02   .4718926E-02   .6537308E-02   .8313694E-02
   .9785960E-02   .1064365E-01   .1067758E-01   .9839392E-02   .8277310E-02
   .6284912E-02   .4231583E-02   .2438881E-02   .1079609E-02   .1262547E-03
  -.7167653E-03  -.1850693E-02  -.3545613E-02  -.5886813E-02  -.8785211E-02
  -.1205387E-01  -.1546882E-01  -.1884081E-01  -.2204830E-01  -.2511346E-01
  -.2817189E-01  -.3134897E-01  -.3465212E-01  -.3795709E-01  -.4110134E-01
  -.4387733E-01  -.4602250E-01  -.4724306E-01  -.4730992E-01  -.4621315E-01
  -.4396778E-01  -.4050293E-01  -.3583022E-01  -.3012589E-01  -.2370075E-01
  -.1701124E-01  -.1056195E-01  -.4740299E-02   .1894325E-03   .4048086E-02
   .6815587E-02   .8635722E-02   .9806492E-02   .1070893E-01   .1188056E-01
   .1384762E-01   .1687088E-01   .2107998E-01   .2649755E-01   .3290551E-01
   .3986938E-01   .4689873E-01   .5361895E-01   .5960328E-01   .6431509E-01
   .6732908E-01   .6828166E-01   .6704960E-01   .6395957E-01   .5963115E-01
   .5475445E-01   .4990908E-01   .4549016E-01   .4162662E-01   .3821869E-01
   .3504644E-01   .3187430E-01   .2863826E-01   .2541245E-01   .2225143E-01
   .1911478E-01   .1582963E-01   .1222243E-01   .8213539E-02   .3848415E-02
  -.7526513E-03  -.5400779E-02  -.9777326E-02  -.1343676E-01  -.1604996E-01
  -.1740790E-01  -.1748249E-01  -.1649021E-01  -.1479962E-01  -.1272732E-01
  -.1045582E-01  -.8126795E-02  -.6082845E-02  -.4897538E-02  -.5018671E-02
  -.6577849E-02  -.9382009E-02  -.1300871E-01  -.1709619E-01  -.2140422E-01
  -.2567858E-01  -.2964673E-01  -.3311507E-01  -.3598466E-01  -.3823328E-01
  -.3994397E-01  -.4125684E-01  -.4228649E-01  -.4312675E-01  -.4387638E-01
  -.4460949E-01  -.4521374E-01  -.4526429E-01  -.4429301E-01  -.4200756E-01
  -.3824427E-01  -.3305075E-01  -.2667928E-01  -.1952413E-01  -.1211364E-01
  -.5074151E-02   .1083743E-02   .6067805E-02   .9735036E-02   .1214779E-01
   .1360490E-01   .1452056E-01   .1515057E-01   .1556545E-01   .1581332E-01
   .1593994E-01   .1600909E-01   .1607576E-01   .1616759E-01   .1627543E-01
   .1646119E-01   .1681828E-01   .1738496E-01   .1816928E-01   .1928794E-01
   .2087454E-01   .2285474E-01   .2496105E-01   .2688458E-01   .2812784E-01
   .2811623E-01   .2657299E-01   .2361131E-01   .1964080E-01   .1506536E-01
   .1017164E-01   .5172959E-02   .2514691E-03  -.4356427E-02  -.8261612E-02
  -.1112571E-01  -.1266205E-01  -.1272792E-01  -.1151044E-01  -.9392054E-02
  -.6746877E-02  -.3870183E-02  -.1228185E-02   .5585015E-03   .1040851E-02
   .1600332E-03  -.1833334E-02  -.4504346E-02  -.7376922E-02  -.1003601E-01
  -.1221164E-01  -.1380304E-01  -.1486756E-01  -.1557865E-01  -.1618846E-01
  -.1693396E-01  -.1798339E-01  -.1940319E-01  -.2117475E-01  -.2320942E-01
  -.2540692E-01  -.2765589E-01  -.2987466E-01  -.3198171E-01  -.3388436E-01
  -.3498028E-01  -.3443663E-01  -.3185569E-01  -.2735277E-01  -.2139235E-01
  -.1457753E-01  -.7527103E-02  -.7041885E-03   .5806378E-02   .1265962E-01
   .2013308E-01   .2681093E-01   .3075310E-01   .3091785E-01   .2743018E-01
   .2126203E-01   .1376387E-01   .6197553E-02  -.5715473E-03  -.6337331E-02
  -.1137310E-01  -.1608872E-01  -.2055321E-01  -.2452746E-01  -.2755428E-01
  -.2899281E-01  -.2847793E-01  -.2606773E-01  -.2210552E-01  -.1708939E-01
  -.1158681E-01  -.6105753E-02  -.1118647E-02   .2876424E-02   .5565493E-02
   .7001705E-02   .7509836E-02   .7342084E-02   .6619164E-02   .5516741E-02
   .4237068E-02   .2960978E-02   .1766192E-02   .6651933E-03  -.3969243E-03
  -.1481662E-02  -.2625630E-02  -.3471472E-02  -.3460158E-02  -.2306323E-02
  -.1153986E-03   .2604386E-02   .5218576E-02   .7243965E-02   .8453591E-02
   .8880064E-02   .8753836E-02   .8539629E-02   .8790271E-02   .1002300E-01
   .1276702E-01   .1707468E-01   .2229903E-01   .2753421E-01   .3201833E-01
   .3500642E-01   .3586649E-01   .3444499E-01   .3109058E-01   .2648762E-01
   .2130243E-01   .1602052E-01   .1095660E-01   .6292206E-02   .2235793E-02
  -.9708174E-03  -.3068145E-02  -.3675776E-02  -.2556503E-02   .2452870E-03
   .4444865E-02   .9555599E-02   .1501926E-01   .2028546E-01   .2491484E-01
   .2843144E-01   .3009367E-01   .2934047E-01   .2622153E-01   .2133239E-01
   .1560819E-01   .9999932E-02   .5202823E-02   .1507071E-02  -.1352783E-02
  -.4132286E-02  -.7196865E-02  -.1035061E-01  -.1333444E-01  -.1591121E-01
  -.1797082E-01  -.1955032E-01  -.2079702E-01  -.2189192E-01  -.2299128E-01
  -.2417727E-01  -.2539494E-01  -.2649178E-01  -.2733204E-01  -.2773583E-01
  -.2752489E-01  -.2658547E-01  -.2492831E-01  -.2267901E-01  -.2005586E-01
  -.1728260E-01  -.1451389E-01  -.1182073E-01  -.9470108E-02  -.7873957E-02
  -.7300984E-02  -.7802053E-02  -.9266580E-02  -.1136240E-01  -.1360209E-01
  -.1538477E-01  -.1616336E-01  -.1567087E-01  -.1388759E-01  -.1093515E-01
  -.7092239E-02  -.2770466E-02   .1562895E-02   .5529021E-02   .8907075E-02
   .1167753E-01   .1394777E-01   .1586632E-01   .1707918E-01   .1695652E-01
   .1528454E-01   .1235317E-01   .8759194E-02   .5151022E-02   .2102217E-02
  -.4127118E-04  -.1183171E-02  -.1330949E-02  -.5847622E-03   .7993251E-03
   .2538715E-02   .4380317E-02   .6118971E-02   .7618650E-02   .8833349E-02
   .9792615E-02   .1058699E-01   .1133064E-01   .1214053E-01   .1313118E-01
   .1442704E-01   .1610630E-01   .1816060E-01   .2050320E-01   .2299966E-01
   .2547445E-01   .2744794E-01   .2831359E-01   .2778744E-01   .2595049E-01
   .2318925E-01   .1999355E-01   .1689314E-01   .1434314E-01   .1260974E-01
   .1170218E-01   .1143775E-01   .1152185E-01   .1165585E-01   .1159347E-01
   .1119796E-01   .1042878E-01   .9342763E-02   .8045497E-02   .6678459E-02
   .5385866E-02   .4333510E-02   .3653001E-02   .3533424E-02   .4107265E-02
   .5371947E-02   .7214552E-02   .9613651E-02   .1255091E-01   .1588082E-01
   .1875466E-01   .1999887E-01   .1884060E-01   .1512889E-01   .9424482E-02
   .2740200E-02  -.3872005E-02  -.9639684E-02  -.1421233E-01  -.1770466E-01
  -.2061450E-01  -.2288643E-01  -.2392868E-01  -.2342612E-01  -.2144412E-01
  -.1826275E-01  -.1412941E-01  -.9324968E-02  -.4151196E-02   .1096291E-02
   .6228833E-02   .1115874E-01   .1590492E-01   .2047960E-01   .2473915E-01
   .2846581E-01   .3151027E-01   .3377080E-01   .3527057E-01   .3592485E-01
   .3560664E-01   .3433132E-01   .3204269E-01   .2858816E-01   .2398991E-01
   .1858639E-01   .1299918E-01   .7802255E-02   .3337564E-02  -.3567812E-03
  -.3513328E-02  -.6613813E-02  -.1012815E-01  -.1435450E-01  -.1933938E-01
  -.2494314E-01  -.3080318E-01  -.3644814E-01  -.4146365E-01  -.4563652E-01
  -.4869801E-01  -.5028017E-01  -.5012716E-01  -.4796294E-01  -.4330495E-01
  -.3672809E-01  -.2979246E-01  -.2395679E-01  -.2012482E-01  -.1848663E-01
  -.1865155E-01  -.1987256E-01  -.2112019E-01  -.2135591E-01  -.1958695E-01
  -.1491076E-01  -.7023977E-02   .3297286E-02   .1456466E-01   .2536018E-01
   .3468618E-01   .4201251E-01   .4709275E-01   .5003889E-01   .5130436E-01
   .5146155E-01   .5099074E-01   .5007960E-01   .4869415E-01   .4673460E-01
   .4407202E-01   .4070320E-01   .3672716E-01   .3226303E-01   .2737426E-01
   .2214066E-01   .1664696E-01   .1106276E-01   .5576822E-02   .3232716E-03
  -.4551135E-02  -.8619891E-02  -.1140381E-01  -.1275741E-01  -.1288441E-01
  -.1221556E-01  -.1123123E-01  -.1035400E-01  -.9859479E-02  -.9842117E-02
  -.1024082E-01  -.1089236E-01  -.1163558E-01  -.1238039E-01  -.1313161E-01
  -.1409066E-01  -.1551826E-01  -.1753135E-01  -.2007177E-01  -.2293742E-01
  -.2587951E-01  -.2868432E-01  -.3112229E-01  -.3286912E-01  -.3368034E-01
  -.3355097E-01  -.3270105E-01  -.3156803E-01  -.3064108E-01  -.3025732E-01
  -.3056036E-01  -.3151163E-01  -.3293560E-01  -.3458511E-01  -.3621290E-01
  -.3758333E-01  -.3846198E-01  -.3863835E-01  -.3802508E-01  -.3666177E-01
  -.3432195E-01  -.3042010E-01  -.2485123E-01  -.1834733E-01  -.1195657E-01
  -.6501367E-02  -.2373826E-02   .4588314E-03   .2319041E-02   .3665951E-02
   .4927007E-02   .6402889E-02   .7863504E-02   .8742581E-02   .8610603E-02
   .7257496E-02   .4747724E-02   .1360900E-02  -.2440839E-02  -.6143693E-02
  -.9345097E-02  -.1185454E-01  -.1345381E-01  -.1390368E-01  -.1317907E-01
  -.1153372E-01  -.9413184E-02  -.7280922E-02  -.5481497E-02  -.4193727E-02
  -.3429927E-02  -.3210311E-02  -.3582428E-02  -.4498092E-02  -.5801046E-02
  -.7266485E-02  -.8671939E-02  -.9750694E-02  -.1016850E-01  -.9657116E-02
  -.8072892E-02  -.5095150E-02  -.4333337E-03   .5802403E-02   .1290004E-01
   .1983216E-01   .2581143E-01   .3045064E-01   .3379810E-01   .3618316E-01
   .3810766E-01   .4004086E-01   .4226861E-01   .4419981E-01   .4473666E-01
   .4320583E-01   .3956597E-01   .3438208E-01   .2848377E-01   .2264401E-01
   .1737329E-01   .1288821E-01   .9126462E-02   .5845726E-02   .2686093E-02
  -.7044807E-03  -.4555868E-02  -.8947591E-02  -.1381166E-01  -.1898775E-01
  -.2427856E-01  -.2948676E-01  -.3437278E-01  -.3859219E-01  -.4184697E-01
  -.4386443E-01  -.4443519E-01  -.4357908E-01  -.4144102E-01  -.3828836E-01
  -.3451563E-01  -.3067671E-01  -.2733984E-01  -.2485130E-01  -.2329176E-01
  -.2245906E-01  -.2185034E-01  -.2076785E-01  -.1823508E-01  -.1295062E-01
  -.5013717E-02   .4014298E-02   .1247900E-01   .1915942E-01   .2348081E-01
   .2546569E-01   .2564496E-01   .2477378E-01   .2356610E-01   .2234412E-01
   .2113056E-01   .1985692E-01   .1837631E-01   .1638745E-01   .1362044E-01
   .9975637E-02   .5493271E-02   .2946097E-03  -.5158776E-02  -.1016096E-01
  -.1417344E-01  -.1699788E-01  -.1870053E-01  -.1934141E-01  -.1897613E-01
  -.1770738E-01  -.1542624E-01  -.1198327E-01  -.7656323E-02  -.3155668E-02
   .7806607E-03   .3710246E-02   .5493652E-02   .6090072E-02   .5554535E-02
   .4137494E-02   .2043931E-02  -.5864254E-03  -.3554248E-02  -.6620295E-02
  -.9557245E-02  -.1218751E-01  -.1427777E-01  -.1562585E-01  -.1601244E-01
  -.1515349E-01  -.1290856E-01  -.9395180E-02  -.4978177E-02  -.1101525E-03
   .4925729E-02   .1024362E-01   .1610765E-01   .2261418E-01   .2950122E-01
   .3628770E-01   .4219610E-01   .4621222E-01   .4766648E-01   .4645237E-01
   .4297627E-01   .3802648E-01   .3249230E-01   .2711143E-01   .2231106E-01
   .1822280E-01   .1479774E-01   .1194196E-01   .9511919E-02   .7341732E-02
   .5277365E-02   .3210293E-02   .1168747E-02  -.7333238E-03  -.2412180E-02
  -.3761026E-02  -.4682263E-02  -.5147034E-02  -.5150698E-02  -.4549113E-02
  -.3163706E-02  -.9744723E-03   .1828066E-02   .4917548E-02   .7993921E-02
   .1084778E-01   .1338314E-01   .1554832E-01   .1732674E-01   .1875059E-01
   .1966039E-01   .1971775E-01   .1867288E-01   .1631532E-01   .1263451E-01
   .8039106E-02   .3183426E-02  -.1358097E-02  -.5075307E-02  -.7604726E-02
  -.8720101E-02  -.8400309E-02  -.6746007E-02  -.3862138E-02   .1094854E-04
   .4260345E-02   .8096299E-02   .1095571E-01   .1243441E-01   .1231975E-01
   .1064816E-01   .7484497E-02   .2994054E-02  -.2148971E-02  -.6937924E-02
  -.1054946E-01  -.1260735E-01  -.1319915E-01  -.1273754E-01  -.1177204E-01
  -.1075831E-01  -.9933374E-02  -.9379658E-02  -.9113975E-02  -.9287466E-02
  -.1015704E-01  -.1184062E-01  -.1424825E-01  -.1707444E-01  -.1987938E-01
  -.2224939E-01  -.2395101E-01  -.2494486E-01  -.2531765E-01  -.2487127E-01
  -.2302672E-01  -.1933411E-01  -.1380670E-01  -.6909679E-02   .6484898E-03
   .8177865E-02   .1513770E-01   .2089266E-01   .2442915E-01   .2493831E-01
   .2240809E-01   .1760739E-01   .1173076E-01   .5923117E-02   .1025361E-02
  -.2498862E-02  -.4507673E-02  -.5176861E-02  -.4692425E-02  -.3227710E-02
  -.1043271E-02   .1581351E-02   .4352368E-02   .7003093E-02   .9303678E-02
   .1110074E-01   .1238410E-01   .1327350E-01   .1397018E-01   .1467477E-01
   .1552356E-01   .1659350E-01   .1789651E-01   .1940567E-01   .2105263E-01
   .2275970E-01   .2443854E-01   .2599350E-01   .2729419E-01   .2823024E-01
   .2863228E-01   .2829376E-01   .2688814E-01   .2407827E-01   .1980180E-01
   .1432395E-01   .8124798E-02   .1731050E-02  -.4405222E-02  -.9763843E-02
  -.1383271E-01  -.1636406E-01  -.1733987E-01  -.1696803E-01  -.1566679E-01
  -.1381629E-01  -.1168248E-01  -.9480482E-02  -.7312107E-02  -.5184998E-02
  -.3060501E-02  -.9044389E-03   .1307752E-02   .3598919E-02   .5994259E-02
   .8515638E-02   .1118479E-01   .1413632E-01   .1755481E-01   .2147882E-01
   .2563833E-01   .2914268E-01   .3093520E-01   .3050400E-01   .2800114E-01
   .2401834E-01   .1927567E-01   .1435219E-01   .9623805E-02   .5281940E-02
   .1364729E-02  -.2243601E-02  -.5500621E-02  -.8207038E-02  -.1030455E-01
  -.1189723E-01  -.1320580E-01  -.1446172E-01  -.1581590E-01  -.1730744E-01
  -.1891566E-01  -.2057551E-01  -.2221462E-01  -.2375165E-01  -.2510971E-01
  -.2621384E-01  -.2698023E-01  -.2732518E-01  -.2719724E-01  -.2658662E-01
  -.2541301E-01  -.2351854E-01  -.2088250E-01  -.1767560E-01  -.1420302E-01
  -.1077759E-01  -.7852314E-02  -.5884969E-02  -.5107129E-02  -.5514776E-02
  -.6997595E-02  -.9355472E-02  -.1216482E-01  -.1485010E-01  -.1692240E-01
  -.1814161E-01  -.1852245E-01  -.1824287E-01  -.1756082E-01  -.1676340E-01
  -.1609921E-01  -.1573936E-01  -.1577365E-01  -.1620065E-01  -.1693366E-01
  -.1779143E-01  -.1855733E-01  -.1906210E-01  -.1913717E-01  -.1862854E-01
  -.1745434E-01  -.1550052E-01  -.1270960E-01  -.9213890E-02  -.5527143E-02
  -.2342817E-02  -.1205468E-03   .1005923E-02   .1216345E-02   .8538623E-03
   .3098794E-03  -.9861596E-04  -.1750663E-03   .1571445E-03   .9733434E-03
   .2349394E-02   .4269686E-02   .6629024E-02   .9517356E-02   .1308528E-01
   .1710617E-01   .2110475E-01   .2466116E-01   .2748830E-01   .2939699E-01
   .3027088E-01   .3000984E-01   .2853151E-01   .2590959E-01   .2243340E-01
   .1854742E-01   .1476071E-01   .1148193E-01   .8894375E-02   .6963868E-02
   .5501783E-02   .4315508E-02   .3294801E-02   .2364550E-02   .1457668E-02
   .5364891E-03  -.3217438E-03  -.9840125E-03  -.1363378E-02  -.1408426E-02
  -.1066878E-02  -.2570663E-03   .1125238E-02   .3114478E-02   .5403536E-02
   .7437105E-02   .8758697E-02   .9180325E-02   .8786620E-02   .7911885E-02
   .7014512E-02   .6507218E-02   .6745841E-02   .7928394E-02   .1000955E-01
   .1272699E-01   .1550338E-01   .1759432E-01   .1836602E-01   .1718347E-01
   .1362958E-01   .7796169E-02   .2166219E-03  -.8345225E-02  -.1717990E-01
  -.2573633E-01  -.3338764E-01  -.3938911E-01  -.4327818E-01  -.4486222E-01
  -.4421043E-01  -.4161851E-01  -.3756245E-01  -.3269153E-01  -.2767862E-01
  -.2306312E-01  -.1914235E-01  -.1599548E-01  -.1363578E-01  -.1199795E-01
  -.1087313E-01  -.1003459E-01  -.9289375E-02  -.8465906E-02  -.7438172E-02
  -.6153573E-02  -.4634654E-02  -.2978324E-02  -.1318766E-02   .2202782E-03
   .1545650E-02   .2613871E-02   .3429430E-02   .4031792E-02   .4482710E-02
   .4845255E-02   .5162577E-02   .5446446E-02   .5704041E-02   .5943056E-02
   .6173171E-02   .6410210E-02   .6671146E-02   .6962003E-02   .7283843E-02
   .7634764E-02   .8052307E-02   .8579832E-02   .9230960E-02   .9974334E-02
   .1074730E-01   .1149184E-01   .1216493E-01   .1272491E-01   .1310432E-01
   .1317981E-01   .1285591E-01   .1213668E-01   .1112742E-01   .9985723E-02
   .8861806E-02   .7872286E-02   .7109073E-02   .6607767E-02   .6388873E-02
   .6452217E-02   .6756712E-02   .7230782E-02   .7921472E-02   .8951316E-02
   .1035396E-01   .1195611E-01   .1345352E-01   .1460889E-01   .1519606E-01
   .1503035E-01   .1399172E-01   .1207014E-01   .9595268E-02   .7104693E-02
   .5048237E-02   .3659249E-02   .2940271E-02   .2723157E-02   .2750512E-02
   .2695572E-02   .2150036E-02   .8004165E-03  -.1436364E-02  -.4392782E-02
  -.7762750E-02  -.1121698E-01  -.1448842E-01  -.1738195E-01  -.1976352E-01
  -.2131160E-01  -.2157968E-01  -.2036788E-01  -.1782510E-01  -.1436100E-01
  -.1047543E-01  -.6641457E-02  -.3269031E-02  -.8612607E-03   .1680149E-03
  -.2924528E-03  -.2079220E-02  -.4740309E-02  -.7505508E-02  -.9571722E-02
  -.1044130E-01  -.9908546E-02  -.7940498E-02  -.4691447E-02  -.5500537E-03
   .3935826E-02   .8176687E-02   .1171990E-01   .1422625E-01   .1538365E-01
   .1505724E-01   .1345554E-01   .1103856E-01   .8358338E-02   .5888425E-02
   .3985746E-02   .2923352E-02   .3035968E-02   .4541485E-02   .7465094E-02
   .1169423E-01   .1691253E-01   .2243128E-01   .2742112E-01   .3131962E-01
   .3391079E-01   .3522059E-01   .3526984E-01   .3408875E-01   .3181168E-01
   .2863877E-01   .2483120E-01   .2071222E-01   .1659043E-01   .1273928E-01
   .9340343E-02   .6430270E-02   .3902811E-02   .1555298E-02  -.9889800E-03
  -.4165257E-02  -.8180962E-02  -.1278492E-01  -.1745144E-01  -.2164013E-01
  -.2490536E-01  -.2698561E-01  -.2781597E-01  -.2754513E-01  -.2637945E-01
  -.2440920E-01  -.2161259E-01  -.1799920E-01  -.1369182E-01  -.9172420E-02
  -.5077702E-02  -.1888796E-02   .1179251E-03   .8342182E-03   .2801722E-03
  -.1430255E-02  -.4124872E-02  -.7513644E-02  -.1101103E-01  -.1392517E-01
  -.1581899E-01  -.1648514E-01  -.1593682E-01  -.1439711E-01  -.1224308E-01
  -.9904434E-02  -.7753785E-02  -.6020067E-02  -.4775513E-02  -.4016042E-02
  -.3712197E-02  -.3780406E-02  -.4076013E-02  -.4436178E-02  -.4736205E-02
  -.4899933E-02  -.4927725E-02  -.4867225E-02  -.4778814E-02  -.4720071E-02
  -.4743634E-02  -.4885190E-02  -.5158953E-02  -.5552904E-02  -.6035512E-02
  -.6568200E-02  -.7112315E-02  -.7611757E-02  -.7966601E-02  -.8050020E-02
  -.7751325E-02  -.7008857E-02  -.5835474E-02  -.4350165E-02  -.2785220E-02
  -.1394126E-02  -.3420206E-03   .2745180E-03   .4353619E-03   .2134371E-03
  -.3083997E-03  -.1060996E-02  -.1943233E-02  -.2761854E-02  -.3304435E-02
  -.3392487E-02  -.2898898E-02  -.1813766E-02  -.2665870E-03   .1533227E-02
   .3362640E-02   .5033679E-02   .6387427E-02   .7280772E-02   .7583704E-02
   .7238251E-02   .6237554E-02   .4607253E-02   .2472525E-02   .3548537E-04
  -.2440236E-02  -.4601741E-02  -.6124312E-02  -.6801917E-02  -.6563708E-02
  -.5515503E-02  -.3833516E-02  -.1734383E-02   .5458809E-03   .2848605E-02
   .5167548E-02   .7561277E-02   .9911115E-02   .1193237E-01   .1341607E-01
   .1431661E-01   .1472778E-01   .1480909E-01   .1471969E-01   .1453829E-01
   .1429359E-01   .1399582E-01   .1363371E-01   .1318581E-01   .1267620E-01
   .1216908E-01   .1173160E-01   .1138281E-01   .1110164E-01   .1076084E-01
   .1019427E-01   .9290864E-02   .8023957E-02   .6446529E-02   .4671683E-02
   .2850113E-02   .1147893E-02  -.2863397E-03  -.1275339E-02  -.1686168E-02
  -.1520069E-02  -.8872890E-03   .8487031E-04   .1277815E-02   .2565602E-02
   .3806371E-02   .4832359E-02   .5517311E-02   .5807306E-02   .5649400E-02
   .5017055E-02   .3960568E-02   .2597754E-02   .1095139E-02  -.3336800E-03
  -.1485068E-02  -.2262399E-02  -.2677509E-02  -.2831909E-02  -.2864310E-02
  -.2923742E-02  -.3133567E-02  -.3565083E-02  -.4229149E-02  -.5100295E-02
  -.6178712E-02  -.7462705E-02  -.8844370E-02  -.1010777E-01  -.1104797E-01
  -.1154489E-01  -.1155608E-01  -.1111078E-01  -.1021285E-01  -.8822600E-02
  -.6976334E-02  -.4806362E-02  -.2508859E-02  -.2645442E-03   .1730484E-02
   .3323145E-02   .4474992E-02   .5253403E-02   .5768643E-02   .6137489E-02
   .6466553E-02   .6758065E-02   .6927977E-02   .6897651E-02   .6434258E-02
   .5216159E-02   .3222621E-02   .7466568E-03  -.1848398E-02  -.4193088E-02
  -.6000033E-02  -.7154973E-02  -.7721882E-02  -.7879326E-02  -.7823004E-02
  -.7718480E-02  -.7692533E-02  -.7816591E-02  -.8109903E-02  -.8542980E-02
  -.9057126E-02  -.9581522E-02  -.1004761E-01  -.1039984E-01  -.1061471E-01
  -.1069238E-01  -.1065914E-01  -.1055090E-01  -.1040790E-01  -.1025626E-01
  -.1009894E-01  -.9925796E-02  -.9732482E-02  -.9514790E-02  -.9242255E-02
  -.8778772E-02  -.7961523E-02  -.6718650E-02  -.5055386E-02  -.3000148E-02
  -.6114094E-03   .2000602E-02   .4648870E-02   .7094188E-02   .9153083E-02
   .1071963E-01   .1171863E-01   .1207651E-01   .1173523E-01   .1067127E-01
   .8910851E-02   .6565715E-02   .3812719E-02   .8138179E-03  -.2287734E-02
  -.5300333E-02  -.7923414E-02  -.9887351E-02  -.1095793E-01  -.1097217E-01
  -.9977011E-02  -.8167107E-02  -.5789185E-02  -.3106892E-02  -.3801041E-03
   .2049522E-02   .3834691E-02   .4802110E-02   .4991035E-02   .4426518E-02
   .3097884E-02   .1112621E-02  -.1313397E-02  -.3863818E-02  -.6206235E-02
  -.8098500E-02  -.9432642E-02  -.1018718E-01  -.1043688E-01  -.1027351E-01
  -.9783389E-02  -.9075432E-02  -.8285475E-02  -.7527247E-02  -.6874696E-02
  -.6352961E-02  -.5943267E-02  -.5602782E-02  -.5310225E-02  -.5164241E-02
  -.5313688E-02  -.5812674E-02  -.6624454E-02  -.7647601E-02  -.8877471E-02
  -.1044189E-01  -.1245051E-01  -.1471745E-01  -.1686820E-01  -.1859619E-01
  -.1969265E-01  -.1989011E-01  -.1895055E-01  -.1667340E-01  -.1284528E-01
  -.7467352E-02  -.7864231E-03   .6760174E-02   .1458012E-01   .2202330E-01
   .2859992E-01   .3382633E-01   .3736020E-01   .3925923E-01   .3984384E-01
   .3934884E-01   .3791405E-01   .3572401E-01   .3294995E-01   .2979293E-01
   .2644700E-01   .2306377E-01   .1971876E-01   .1648229E-01   .1355588E-01
   .1117666E-01   .9423126E-02   .8382826E-02   .8113843E-02   .8527027E-02
   .9446238E-02   .1077778E-01   .1249378E-01   .1453308E-01   .1678578E-01
   .1912124E-01   .2140708E-01   .2349870E-01   .2524448E-01   .2649579E-01
   .2717817E-01   .2733051E-01   .2700948E-01   .2628063E-01   .2520584E-01
   .2380946E-01   .2212736E-01   .2022723E-01   .1818759E-01   .1606292E-01
   .1387622E-01   .1163857E-01   .9352805E-02   .7001009E-02   .4409128E-02
   .1330989E-02  -.2256415E-02  -.6127416E-02  -.9960446E-02  -.1351291E-01
  -.1667000E-01  -.1955737E-01  -.2243643E-01  -.2549784E-01  -.2860682E-01
  -.3136491E-01  -.3342580E-01  -.3459973E-01  -.3484886E-01  -.3428329E-01
  -.3304025E-01  -.3124868E-01  -.2908767E-01  -.2674239E-01  -.2433847E-01
  -.2189378E-01  -.1938815E-01  -.1685452E-01  -.1444622E-01  -.1232966E-01
  -.1057139E-01  -.9142276E-02  -.7947710E-02  -.6869064E-02  -.5801691E-02
  -.4683070E-02  -.3501588E-02  -.2319125E-02  -.1249713E-02  -.3843811E-03
   .2335120E-03   .5988723E-03   .7044679E-03   .5594086E-03   .1720567E-03
  -.4503122E-03  -.1275251E-02  -.2255861E-02  -.3344164E-02  -.4498839E-02
  -.5677363E-02  -.6845785E-02  -.7969310E-02  -.9000000E-02  -.9903540E-02
  -.1067696E-01  -.1134868E-01  -.1193493E-01  -.1240832E-01  -.1265300E-01
  -.1244817E-01  -.1152400E-01  -.9627810E-02  -.6659944E-02  -.2794199E-02
   .1529420E-02   .5779362E-02   .9566265E-02   .1270514E-01   .1518145E-01
   .1698906E-01   .1815232E-01   .1878993E-01   .1896334E-01   .1868118E-01
   .1802127E-01   .1710912E-01   .1607459E-01   .1483742E-01   .1315652E-01
   .1097280E-01   .8612198E-02   .6544641E-02   .5100096E-02   .4421648E-02
   .4463391E-02   .5027683E-02   .5849309E-02   .6688150E-02   .7380014E-02
   .7835163E-02   .7995897E-02   .7816110E-02   .7280004E-02   .6406400E-02
   .5276535E-02   .3855342E-02   .2054261E-02  -.4778935E-04  -.2117916E-02
  -.3770980E-02  -.4777596E-02  -.5115964E-02  -.4882702E-02  -.4243190E-02
  -.3398066E-02  -.2548286E-02  -.1838968E-02  -.1359757E-02  -.1138002E-02
  -.1157092E-02  -.1344243E-02  -.1609697E-02  -.1863027E-02  -.2159974E-02
  -.2675207E-02  -.3682592E-02  -.5227490E-02  -.7023710E-02  -.8845209E-02
  -.1078309E-01  -.1289202E-01  -.1502169E-01  -.1700944E-01  -.1866849E-01
  -.1983322E-01  -.2031885E-01  -.1999021E-01  -.1888959E-01  -.1706812E-01
  -.1455588E-01  -.1145524E-01  -.7961164E-02  -.4348057E-02  -.1027126E-02
   .1616440E-02   .3417351E-02   .4375858E-02   .4528773E-02   .3969889E-02
   .2828366E-02   .1232929E-02  -.6551466E-03  -.2665064E-02  -.4690306E-02
  -.6703398E-02  -.8709202E-02  -.1073929E-01  -.1283274E-01  -.1501052E-01
  -.1718603E-01  -.1913661E-01  -.2065585E-01  -.2144392E-01  -.2121303E-01
  -.1972723E-01  -.1677875E-01  -.1238930E-01  -.6990250E-02  -.1259359E-02
   .4199323E-02   .8950416E-02   .1264508E-01   .1509592E-01   .1642223E-01
   .1696425E-01   .1715964E-01   .1732049E-01   .1749464E-01   .1754297E-01
   .1730730E-01   .1667825E-01   .1563312E-01   .1415992E-01   .1227391E-01
   .1004383E-01   .7656418E-02   .5344423E-02   .3273722E-02   .1561986E-02
   .4285338E-03   .1107296E-03   .7295221E-03   .2240995E-02   .4423103E-02
   .6933478E-02   .9415214E-02   .1161776E-01   .1342504E-01   .1483448E-01
   .1573400E-01   .1595684E-01   .1549095E-01   .1449180E-01   .1321970E-01
   .1193798E-01   .1084818E-01   .1004794E-01   .9533789E-02   .9225966E-02
   .9008658E-02   .8761576E-02   .8383739E-02   .7784223E-02   .6910865E-02
   .5770723E-02   .4423342E-02   .2963851E-02   .1532241E-02   .2778295E-03
  -.6509909E-03  -.1078859E-02  -.9089412E-03  -.1927314E-03   .9123975E-03
   .2199635E-02   .3476676E-02   .4553941E-02   .5288408E-02   .5641095E-02
   .5653220E-02   .5371768E-02   .4847035E-02   .4145026E-02   .3208625E-02
   .1907347E-02   .1918751E-03  -.1889126E-02  -.4224810E-02  -.6828713E-02
  -.9821406E-02  -.1327380E-01  -.1701619E-01  -.2065338E-01  -.2379738E-01
  -.2621484E-01  -.2781286E-01  -.2860137E-01  -.2862954E-01  -.2800376E-01
  -.2684857E-01  -.2528641E-01  -.2347437E-01  -.2156628E-01  -.1966941E-01
  -.1782355E-01  -.1602411E-01  -.1421680E-01  -.1233387E-01  -.1038441E-01
  -.8537757E-02  -.6999033E-02  -.5886188E-02  -.5194589E-02  -.4826946E-02
  -.4637258E-02  -.4473618E-02  -.4214521E-02  -.3799076E-02  -.3224445E-02
  -.2519980E-02  -.1688333E-02  -.7183413E-03   .3689251E-03   .1516746E-02
   .2616428E-02   .3524265E-02   .4156298E-02   .4501862E-02   .4620235E-02
   .4608498E-02   .4592150E-02   .4689648E-02   .4976379E-02   .5461940E-02
   .6105727E-02   .6815220E-02   .7483064E-02   .7966410E-02   .8089723E-02
   .7678624E-02   .6606994E-02   .4871635E-02   .2649303E-02   .2150250E-03
  -.2165262E-02  -.4271511E-02  -.5871097E-02  -.6797252E-02  -.7052988E-02
  -.6777605E-02  -.6174885E-02  -.5442516E-02  -.4752739E-02  -.4234643E-02
  -.3955536E-02  -.3914306E-02  -.4061960E-02  -.4432467E-02  -.5114057E-02
  -.6144273E-02  -.7513080E-02  -.9127926E-02  -.1080150E-01  -.1232246E-01
  -.1352856E-01  -.1432478E-01  -.1472183E-01  -.1481699E-01  -.1473586E-01
  -.1455047E-01  -.1428406E-01  -.1395840E-01  -.1358520E-01  -.1316988E-01
  -.1271421E-01  -.1222602E-01  -.1167996E-01  -.1103550E-01  -.1026015E-01
  -.9267342E-02  -.7927134E-02  -.6177098E-02  -.4022930E-02  -.1528489E-02
   .1191280E-02   .3853999E-02   .6114603E-02   .7770110E-02   .8781716E-02
   .9106397E-02   .8642238E-02   .7368679E-02   .5392152E-02   .2802244E-02
  -.3406098E-03  -.3815475E-02  -.7212013E-02  -.1011003E-01  -.1227604E-01
  -.1351894E-01  -.1362953E-01  -.1256213E-01  -.1055915E-01  -.8148139E-02
  -.5930354E-02  -.4303917E-02  -.3209146E-02  -.1989198E-02   .3542821E-04
   .3003855E-02   .6633690E-02   .1051898E-01   .1429755E-01   .1771375E-01
   .2064707E-01   .2308184E-01   .2497340E-01   .2627850E-01   .2699604E-01
   .2714131E-01   .2679653E-01   .2610482E-01   .2522417E-01   .2413933E-01
   .2271342E-01   .2087493E-01   .1874436E-01   .1659480E-01   .1466316E-01
   .1308071E-01   .1186791E-01   .1098385E-01   .1033478E-01   .9862507E-02
   .9584547E-02   .9530007E-02   .9685657E-02   .1001460E-01   .1046269E-01
   .1097301E-01   .1146007E-01   .1183406E-01   .1193743E-01   .1160944E-01
   .1081980E-01   .9665928E-02   .8333257E-02   .7050359E-02   .6041552E-02
   .5428202E-02   .5217323E-02   .5310639E-02   .5550648E-02   .5742053E-02
   .5715049E-02   .5146359E-02   .3871345E-02   .2075483E-02   .5007909E-04
  -.1911103E-02  -.3596961E-02  -.4882438E-02  -.5762359E-02  -.6307902E-02
  -.6640026E-02  -.6847368E-02  -.6985746E-02  -.7066004E-02  -.7047659E-02
  -.6880033E-02  -.6429243E-02  -.5527104E-02  -.4107517E-02  -.2191852E-02
   .1094801E-03   .2634582E-02   .5136428E-02   .7356666E-02   .9059135E-02
   .9984270E-02   .9962356E-02   .8868480E-02   .6630593E-02   .3412590E-02
  -.3175036E-03  -.3966173E-02  -.7095650E-02  -.9493713E-02  -.1116729E-01
  -.1224092E-01  -.1292075E-01  -.1326122E-01  -.1321445E-01  -.1277549E-01
  -.1190884E-01  -.1053470E-01  -.8631881E-02  -.6131608E-02  -.2875730E-02
   .1165445E-02   .5776524E-02   .1061364E-01   .1519550E-01   .1906826E-01
   .2201601E-01   .2408961E-01   .2553037E-01   .2666040E-01   .2773413E-01
   .2888377E-01   .3006211E-01   .3096326E-01   .3118885E-01   .3039849E-01
   .2845468E-01   .2546996E-01   .2166182E-01   .1724838E-01   .1258760E-01
   .8195612E-02   .4503750E-02   .1694005E-02  -.3001504E-03  -.1604316E-02
  -.2338007E-02  -.2624355E-02  -.2590522E-02  -.2380991E-02  -.2120883E-02
  -.1898155E-02  -.1754465E-02  -.1685489E-02  -.1637301E-02  -.1519449E-02
  -.1237763E-02  -.7453741E-03  -.9262079E-04   .6015694E-03   .1181828E-02
   .1455395E-02   .1276546E-02   .6468336E-03  -.3104047E-03  -.1425411E-02
  -.2538040E-02  -.3534544E-02  -.4354802E-02  -.4927040E-02  -.5181298E-02
  -.5122537E-02  -.4814721E-02  -.4328215E-02  -.3727985E-02  -.3082069E-02
  -.2449269E-02  -.1897384E-02  -.1489844E-02  -.1261666E-02  -.1196178E-02
  -.1268863E-02  -.1455575E-02  -.1725651E-02  -.2063386E-02  -.2457855E-02
  -.2891394E-02  -.3333930E-02  -.3749147E-02  -.4116743E-02  -.4432876E-02
  -.4712652E-02  -.4977324E-02  -.5264096E-02  -.5600062E-02  -.6006756E-02
  -.6504040E-02  -.7114562E-02  -.7838653E-02  -.8654479E-02  -.9528411E-02
  -.1049926E-01  -.1168902E-01  -.1319618E-01  -.1498082E-01  -.1683144E-01
  -.1848970E-01  -.1978538E-01  -.2061213E-01  -.2092606E-01  -.2070394E-01
  -.1995752E-01  -.1872978E-01  -.1705071E-01  -.1499364E-01  -.1271903E-01
  -.1047761E-01  -.8505319E-02  -.6956462E-02  -.5882008E-02  -.5218073E-02
  -.4821409E-02  -.4522022E-02  -.4176045E-02  -.3686775E-02  -.3008091E-02
  -.2063129E-02  -.7774964E-03   .8445518E-03   .2726688E-02   .4823937E-02
   .7212050E-02   .9890084E-02   .1258075E-01   .1490680E-01   .1660085E-01
   .1751521E-01   .1765330E-01   .1717489E-01   .1633305E-01   .1538139E-01
   .1450384E-01   .1380418E-01   .1330928E-01   .1300836E-01   .1287079E-01
   .1285076E-01   .1295720E-01   .1322756E-01   .1367014E-01   .1426274E-01
   .1496337E-01   .1571082E-01   .1645066E-01   .1713662E-01   .1773749E-01
   .1825298E-01   .1870244E-01   .1911131E-01   .1947424E-01   .1976733E-01
   .1994388E-01   .1993376E-01   .1968562E-01   .1913609E-01   .1804634E-01
   .1614010E-01   .1334042E-01   .9817462E-02   .5945112E-02   .2154349E-02
  -.1183145E-02  -.3866509E-02  -.5887773E-02  -.7380856E-02  -.8523709E-02
  -.9501512E-02  -.1047386E-01  -.1152825E-01  -.1263564E-01  -.1371064E-01
  -.1467808E-01  -.1549523E-01  -.1615336E-01  -.1666716E-01  -.1705459E-01
  -.1733256E-01  -.1752103E-01  -.1764248E-01  -.1771898E-01  -.1777339E-01
  -.1787611E-01  -.1811562E-01  -.1853737E-01  -.1914326E-01  -.1990198E-01
  -.2075416E-01  -.2158554E-01  -.2226765E-01  -.2271281E-01  -.2286234E-01
  -.2270490E-01  -.2224927E-01  -.2153770E-01  -.2058311E-01  -.1936354E-01
  -.1788925E-01  -.1621479E-01  -.1441153E-01  -.1251038E-01  -.1051513E-01
  -.8441011E-02  -.6384753E-02  -.4486216E-02  -.2824228E-02  -.1419002E-02
  -.2446467E-03   .5910687E-03   .8814290E-03   .5113831E-03  -.4671825E-03
  -.1856099E-02  -.3405069E-02  -.4896346E-02  -.6190591E-02  -.7187398E-02
  -.7709453E-02  -.7586430E-02  -.6796829E-02  -.5399206E-02  -.3287262E-02
  -.2987483E-03   .3527890E-02   .7849976E-02   .1214987E-01   .1601643E-01
   .1917693E-01   .2149967E-01   .2302992E-01   .2397941E-01   .2462864E-01
   .2520907E-01   .2579084E-01   .2621367E-01   .2620210E-01   .2557401E-01
   .2399638E-01   .2105707E-01   .1676588E-01   .1160490E-01   .6208205E-02
   .1197803E-02  -.2928214E-02  -.5931862E-02  -.7828066E-02  -.8750613E-02
  -.8928967E-02  -.8668919E-02  -.8186553E-02  -.7579850E-02  -.6902422E-02
  -.6170854E-02  -.5398833E-02  -.4582379E-02  -.3713185E-02  -.2772310E-02
  -.1753209E-02  -.6686214E-03   .4424632E-03   .1397537E-02   .1884684E-02
   .1647077E-02   .3924310E-03  -.2066529E-02  -.5644128E-02  -.9981157E-02
  -.1459309E-01  -.1903343E-01  -.2284963E-01  -.2563967E-01  -.2727011E-01
  -.2789080E-01  -.2785323E-01  -.2756412E-01  -.2732406E-01  -.2712083E-01
  -.2673503E-01  -.2592932E-01  -.2455748E-01  -.2261653E-01  -.2022902E-01
  -.1758476E-01  -.1488662E-01  -.1227582E-01  -.9860017E-02  -.7697237E-02
  -.5829011E-02  -.4334619E-02  -.3266786E-02  -.2586487E-02  -.2187670E-02
  -.1954164E-02  -.1807312E-02  -.1690750E-02  -.1573458E-02  -.1446670E-02
  -.1380622E-02  -.1508883E-02  -.1949832E-02  -.2744173E-02  -.3851396E-02
  -.5188700E-02  -.6660453E-02  -.8171333E-02  -.9641660E-02  -.1092997E-01
  -.1189026E-01  -.1245981E-01  -.1266306E-01  -.1246284E-01  -.1177598E-01
  -.1055371E-01  -.8746547E-02  -.6359057E-02  -.3478664E-02  -.1949458E-03
   .3399425E-02   .7098727E-02   .1060026E-01   .1365305E-01   .1616286E-01
   .1818326E-01   .1979261E-01   .2106631E-01   .2211576E-01   .2305655E-01
   .2390852E-01   .2460907E-01   .2511568E-01   .2542077E-01   .2553228E-01
   .2543791E-01   .2512736E-01   .2461428E-01   .2393743E-01   .2313501E-01
   .2220503E-01   .2112571E-01   .1989692E-01   .1854408E-01   .1710225E-01
   .1555325E-01   .1383737E-01   .1193418E-01   .9873052E-02   .7731402E-02
   .5581225E-02   .3432435E-02   .1192112E-02  -.1072552E-02  -.3124655E-02
  -.4766008E-02  -.5880012E-02  -.6470337E-02  -.6639105E-02  -.6499940E-02
  -.6104420E-02  -.5512908E-02  -.4820482E-02  -.4128611E-02  -.3503995E-02
  -.2978986E-02  -.2543603E-02  -.2161087E-02  -.1781393E-02  -.1331960E-02
  -.7371972E-03   .4240379E-04   .1005898E-02   .2130251E-02   .3386685E-02
   .4708913E-02   .5960459E-02   .6980753E-02   .7668790E-02   .7823904E-02
   .7228611E-02   .5852549E-02   .3848008E-02   .1481756E-02  -.9072893E-03
  -.2970605E-02  -.4481143E-02  -.5385507E-02  -.5789731E-02  -.5856660E-02
  -.5763158E-02  -.5670533E-02  -.5699602E-02  -.5913719E-02  -.6320353E-02
  -.6878127E-02  -.7491046E-02  -.8043014E-02  -.8433220E-02  -.8549395E-02
  -.8256705E-02  -.7488035E-02  -.6266585E-02  -.4683902E-02  -.2868004E-02
  -.9641345E-03   .8997262E-03   .2555267E-02   .3829400E-02   .4642160E-02
   .5030846E-02   .5120957E-02   .5061338E-02   .4978492E-02   .4957390E-02
   .5044351E-02   .5244254E-02   .5531124E-02   .5858823E-02   .6171054E-02
   .6418947E-02   .6574258E-02   .6629930E-02   .6631063E-02   .6686870E-02
   .6909555E-02   .7348033E-02   .7982468E-02   .8737986E-02   .9531208E-02
   .1029857E-01   .1100523E-01   .1165311E-01   .1225545E-01   .1283330E-01
   .1338771E-01   .1390039E-01   .1435109E-01   .1472684E-01   .1496502E-01
   .1493898E-01   .1455486E-01   .1380389E-01   .1275370E-01   .1143996E-01
   .9776829E-02   .7655474E-02   .5130655E-02   .2394299E-02  -.3328209E-03
  -.2888170E-02  -.5190674E-02  -.7188185E-02  -.8793158E-02  -.9950614E-02
  -.1068596E-01  -.1107698E-01  -.1122749E-01  -.1121910E-01  -.1108192E-01
  -.1082899E-01  -.1047689E-01  -.1002510E-01  -.9453631E-02  -.8739253E-02
  -.7880698E-02  -.6866627E-02  -.5674428E-02  -.4292040E-02  -.2744776E-02
  -.1084704E-02   .5876174E-03   .2157309E-02   .3547007E-02   .4681779E-02
   .5471989E-02   .5875657E-02   .5934540E-02   .5731993E-02   .5361004E-02
   .4911684E-02   .4463476E-02   .4066809E-02   .3740051E-02   .3480978E-02
   .3299071E-02   .3257300E-02   .3421237E-02   .3812776E-02   .4447136E-02
   .5315989E-02   .6371188E-02   .7502228E-02   .8523037E-02   .9240846E-02
   .9562772E-02   .9485908E-02   .9010492E-02   .8148390E-02   .6978659E-02
   .5608831E-02   .4149068E-02   .2693632E-02   .1312350E-02   .3457381E-04
  -.1126460E-02  -.2177016E-02  -.3143377E-02  -.4065254E-02  -.4977553E-02
  -.5864583E-02  -.6686466E-02  -.7420033E-02  -.8057953E-02  -.8596697E-02
  -.9035962E-02  -.9384241E-02  -.9664871E-02  -.9880722E-02  -.1002063E-01
  -.1007291E-01  -.1003660E-01  -.9921565E-02  -.9691594E-02  -.9288130E-02
  -.8687742E-02  -.7903791E-02  -.6916802E-02  -.5603576E-02  -.3837999E-02
  -.1611571E-02   .8848536E-03   .3351752E-02   .5553456E-02   .7363132E-02
   .8724404E-02   .9634951E-02   .1018129E-01   .1050271E-01   .1075638E-01
   .1106787E-01   .1151943E-01   .1212872E-01   .1287176E-01   .1368323E-01
   .1446918E-01   .1513067E-01   .1560555E-01   .1580799E-01   .1565742E-01
   .1515121E-01   .1434682E-01   .1327969E-01   .1186681E-01   .1001068E-01
   .7706436E-02   .5045236E-02   .2171161E-02  -.7585364E-03  -.3614356E-02
  -.6225463E-02  -.8384625E-02  -.9964011E-02  -.1097222E-01  -.1145929E-01
  -.1143334E-01  -.1090968E-01  -.9947570E-02  -.8657384E-02  -.7186711E-02
  -.5675176E-02  -.4233903E-02  -.2938505E-02  -.1812714E-02  -.8310023E-03
   .2702122E-04   .7421789E-03   .1297318E-02   .1664907E-02   .1799790E-02
   .1655739E-02   .1088433E-02  -.5559325E-04  -.1802458E-02  -.4073529E-02
  -.6721661E-02  -.9561028E-02  -.1233970E-01  -.1479983E-01  -.1679127E-01
  -.1830837E-01  -.1946053E-01  -.2042170E-01  -.2138534E-01  -.2251921E-01
  -.2388434E-01  -.2536003E-01  -.2672301E-01  -.2780406E-01  -.2847475E-01
  -.2867894E-01  -.2845158E-01  -.2787906E-01  -.2704556E-01  -.2604291E-01
  -.2495444E-01  -.2383988E-01  -.2257450E-01  -.2094042E-01  -.1885265E-01
  -.1642871E-01  -.1389643E-01  -.1146145E-01  -.9272607E-02  -.7414477E-02
  -.5889488E-02  -.4629468E-02  -.3532880E-02  -.2553963E-02  -.1702198E-02
  -.9776068E-03  -.3874509E-03   .4941553E-04   .3203767E-03   .4202432E-03
   .1667271E-03  -.7544463E-03  -.2497472E-02  -.4921594E-02  -.7668948E-02
  -.1038309E-01  -.1271238E-01  -.1438268E-01  -.1530347E-01  -.1557307E-01
  -.1541230E-01  -.1508543E-01  -.1481620E-01  -.1475031E-01  -.1494102E-01
  -.1536830E-01  -.1593614E-01  -.1651724E-01  -.1699955E-01  -.1731457E-01
  -.1743141E-01  -.1735675E-01  -.1708174E-01  -.1660397E-01  -.1594659E-01
  -.1510666E-01  -.1406160E-01  -.1283365E-01  -.1147294E-01  -.1006580E-01
  -.8710757E-02  -.7486300E-02  -.6424362E-02  -.5508195E-02  -.4678359E-02
  -.3850792E-02  -.2959397E-02  -.1965359E-02  -.8607707E-03   .3778067E-03
   .1807485E-02   .3461234E-02   .5319431E-02   .7315378E-02   .9360960E-02
   .1137694E-01   .1330349E-01   .1511123E-01   .1680212E-01   .1839129E-01
   .1984542E-01   .2105465E-01   .2191292E-01   .2214052E-01   .2149947E-01
   .2003294E-01   .1796460E-01   .1561031E-01   .1333829E-01   .1148788E-01
   .1023682E-01   .9587941E-02   .9426426E-02   .9694584E-02   .1035989E-01
   .1135198E-01   .1255491E-01   .1383912E-01   .1511858E-01   .1641112E-01
   .1775902E-01   .1916066E-01   .2056982E-01   .2189264E-01   .2286516E-01
   .2319371E-01   .2276016E-01   .2154687E-01   .1960458E-01   .1708466E-01
   .1421323E-01   .1121278E-01   .8247958E-02   .5423229E-02   .2773504E-02
   .3242134E-03  -.1857407E-02  -.3717369E-02  -.5281503E-02  -.6631947E-02
  -.7828962E-02  -.8743864E-02  -.9171982E-02  -.9009703E-02  -.8247888E-02
  -.6798147E-02  -.4567358E-02  -.1616055E-02   .1770473E-02   .5179799E-02
   .8304248E-02   .1097703E-01   .1320396E-01   .1508673E-01   .1677154E-01
   .1827612E-01   .1948542E-01   .2031233E-01   .2072497E-01   .2073281E-01
   .2039980E-01   .1982497E-01   .1908970E-01   .1821528E-01   .1720631E-01
   .1606734E-01   .1482226E-01   .1349273E-01   .1211079E-01   .1071104E-01
   .9346700E-02   .8049634E-02   .6833338E-02   .5690351E-02   .4649010E-02
   .3763560E-02   .3052517E-02   .2498932E-02   .2055712E-02   .1670031E-02
   .1285204E-02   .8372149E-03   .2893445E-03  -.3679782E-03  -.1116705E-02
  -.2025553E-02  -.3203454E-02  -.4694852E-02  -.6458825E-02  -.8377140E-02
  -.1028846E-01  -.1204637E-01  -.1356820E-01  -.1481348E-01  -.1574455E-01
  -.1635229E-01  -.1665493E-01  -.1662409E-01  -.1620963E-01  -.1542167E-01
  -.1419704E-01  -.1243550E-01  -.1013754E-01  -.7373482E-02  -.4248211E-02
  -.8998056E-03   .2504635E-02   .5766533E-02   .8732799E-02   .1133529E-01
   .1355466E-01   .1542049E-01   .1702314E-01   .1847970E-01   .1984322E-01
   .2106593E-01   .2206596E-01   .2265257E-01   .2260738E-01   .2183404E-01
   .2033890E-01   .1823554E-01   .1567245E-01   .1280228E-01   .9781659E-02
   .6807688E-02   .4052236E-02   .1628201E-02  -.4200085E-03  -.2120851E-02
  -.3538687E-02  -.4693057E-02  -.5603196E-02  -.6318184E-02  -.6904837E-02
  -.7346671E-02  -.7547616E-02  -.7434281E-02  -.7001036E-02  -.6300500E-02
  -.5419818E-02  -.4445353E-02  -.3400644E-02  -.2243769E-02  -.1002167E-02
   .1927662E-03   .1222266E-02   .2026607E-02   .2621133E-02   .3065055E-02
   .3440453E-02   .3821994E-02   .4267911E-02   .4814937E-02   .5464328E-02
   .6188736E-02   .6947912E-02   .7695854E-02   .8395614E-02   .9001703E-02
   .9475386E-02   .9801515E-02   .9993911E-02   .1009232E-01   .1012821E-01
   .1011527E-01   .1004420E-01   .9865600E-02   .9518418E-02   .8980146E-02
   .8254978E-02   .7354358E-02   .6319021E-02   .5201976E-02   .4069525E-02
   .3005762E-02   .2073695E-02   .1293753E-02   .6422470E-03   .7583535E-04
  -.4606783E-03  -.9969959E-03  -.1540418E-02  -.2088803E-02  -.2636870E-02
  -.3168590E-02  -.3657384E-02  -.4074364E-02  -.4407757E-02  -.4662389E-02
  -.4845182E-02  -.4966536E-02  -.5041786E-02  -.5086935E-02  -.5110561E-02
  -.5110403E-02  -.5076223E-02  -.5003983E-02  -.4897396E-02  -.4766376E-02
  -.4621567E-02  -.4473253E-02  -.4332305E-02  -.4214533E-02  -.4126582E-02
  -.4068536E-02  -.4031754E-02  -.4003692E-02  -.3953978E-02  -.3842047E-02
  -.3644945E-02  -.3354495E-02  -.2954211E-02  -.2374189E-02  -.1555459E-02
  -.5591883E-03   .4451946E-03   .1298252E-02   .1910146E-02   .2270474E-02
   .2428386E-02   .2471615E-02   .2485164E-02   .2539354E-02   .2674236E-02
   .2890037E-02   .3140246E-02   .3361365E-02   .3452114E-02   .3311960E-02
   .2903230E-02   .2248444E-02   .1410345E-02   .4384897E-03  -.6224068E-03
  -.1720291E-02  -.2764950E-02  -.3625841E-02  -.4203259E-02  -.4442293E-02
  -.4340983E-02  -.3965395E-02  -.3423336E-02  -.2782220E-02  -.2015691E-02
  -.1057605E-02   .1124150E-03   .1429276E-02   .2757814E-02   .3964507E-02
   .4948731E-02   .5634598E-02   .5987594E-02   .6014882E-02   .5738200E-02
   .5160375E-02   .4268847E-02   .3090661E-02   .1702524E-02   .2050282E-03
  -.1309469E-02  -.2791126E-02  -.4251382E-02  -.5735555E-02  -.7284241E-02
  -.8915648E-02  -.1063328E-01  -.1241243E-01  -.1421680E-01  -.1601072E-01
  -.1776561E-01  -.1946275E-01  -.2106493E-01  -.2250281E-01  -.2373141E-01
  -.2474493E-01  -.2557461E-01  -.2619605E-01  -.2654727E-01  -.2655727E-01
  -.2615189E-01  -.2531135E-01  -.2409104E-01  -.2260187E-01  -.2098628E-01
  -.1940368E-01  -.1800568E-01  -.1687290E-01  -.1600088E-01  -.1532188E-01
  -.1475363E-01  -.1423078E-01  -.1370714E-01  -.1315071E-01  -.1254509E-01
  -.1189037E-01  -.1119459E-01  -.1047478E-01  -.9750884E-02  -.9044372E-02
  -.8372425E-02  -.7721007E-02  -.7051317E-02  -.6333996E-02  -.5554704E-02
  -.4704772E-02  -.3721088E-02  -.2533323E-02  -.1117666E-02   .4882562E-03
   .2217034E-02   .4011854E-02   .6025782E-02   .8557856E-02   .1152596E-01
   .1444504E-01   .1681986E-01   .1837558E-01   .1909913E-01   .1917294E-01
   .1887068E-01   .1844612E-01   .1808561E-01   .1788627E-01   .1782693E-01
   .1780995E-01   .1773808E-01   .1752969E-01   .1706083E-01   .1618098E-01
   .1481937E-01   .1300992E-01   .1085487E-01   .8486305E-02   .6042409E-02
   .3635123E-02   .1339721E-02  -.8158346E-03  -.2842253E-02  -.4775526E-02
  -.6659872E-02  -.8538737E-02  -.1044049E-01  -.1238166E-01  -.1435597E-01
  -.1632682E-01  -.1821782E-01  -.1995473E-01  -.2149292E-01  -.2283773E-01
  -.2394908E-01  -.2478015E-01  -.2532909E-01  -.2564443E-01  -.2580119E-01
  -.2580513E-01  -.2559454E-01  -.2510873E-01  -.2421828E-01  -.2269876E-01
  -.2040884E-01  -.1740067E-01  -.1390967E-01  -.1024141E-01  -.6660763E-02
  -.3338021E-02  -.3727455E-03   .2097678E-02   .3961321E-02   .5231687E-02
   .5965386E-02   .6217543E-02   .6059779E-02   .5498697E-02   .4519563E-02
   .3176034E-02   .1634865E-02   .1109550E-03  -.1237248E-02  -.2326818E-02
  -.3075519E-02  -.3442656E-02  -.3472657E-02  -.3275490E-02  -.2959433E-02
  -.2604379E-02  -.2272371E-02  -.1997739E-02  -.1737535E-02  -.1366664E-02
  -.7674757E-03   .1189586E-03   .1293784E-02   .2761935E-02   .4513366E-02
   .6405230E-02   .8168313E-02   .9557391E-02   .1044585E-01   .1082478E-01
   .1076973E-01   .1043177E-01   .9973840E-02   .9541901E-02   .9220465E-02
   .9026400E-02   .8936266E-02   .8902743E-02   .8883680E-02   .8851745E-02
   .8794964E-02   .8701884E-02   .8568408E-02   .8425432E-02   .8365255E-02
   .8483742E-02   .8859463E-02   .9534056E-02   .1049067E-01   .1166260E-01
   .1300365E-01   .1449830E-01   .1608445E-01   .1756377E-01   .1869004E-01
   .1933643E-01   .1950439E-01   .1927362E-01   .1871050E-01   .1787963E-01
   .1658084E-01   .1454458E-01   .1192795E-01   .9186793E-02   .6744945E-02
   .4850924E-02   .3545541E-02   .2714402E-02   .2175361E-02   .1763560E-02
   .1402637E-02   .1121322E-02   .9736372E-03   .9801097E-03   .1135057E-02
   .1485233E-02   .2202299E-02   .3461274E-02   .5298404E-02   .7507035E-02
   .9661418E-02   .1136837E-01   .1241831E-01   .1277530E-01   .1250197E-01
   .1176356E-01   .1074366E-01   .9628944E-02   .8563982E-02   .7643755E-02
   .6905479E-02   .6374645E-02   .6066759E-02   .5962024E-02   .5996357E-02
   .6152458E-02   .6450063E-02   .6912100E-02   .7548914E-02   .8333437E-02
   .9207565E-02   .1010937E-01   .1092162E-01   .1150507E-01   .1178330E-01
   .1176793E-01   .1153796E-01   .1117903E-01   .1074762E-01   .1028375E-01
   .9816133E-02   .9362518E-02   .8924206E-02   .8479820E-02   .8007147E-02
   .7495928E-02   .6968721E-02   .6478134E-02   .6079218E-02   .5814865E-02
   .5770070E-02   .6032258E-02   .6611234E-02   .7441197E-02   .8408822E-02
   .9403103E-02   .1033974E-01   .1117827E-01   .1198885E-01   .1290732E-01
   .1398954E-01   .1503095E-01   .1570980E-01   .1582134E-01   .1528072E-01
   .1406022E-01   .1220445E-01   .9861838E-02   .7154260E-02   .4165590E-02
   .1004366E-02  -.2144346E-02  -.5059430E-02  -.7595929E-02  -.9735312E-02
  -.1156266E-01  -.1321315E-01  -.1482626E-01  -.1650407E-01  -.1829786E-01
  -.2011534E-01  -.2176095E-01  -.2307022E-01  -.2389048E-01  -.2409258E-01
  -.2363914E-01  -.2262983E-01  -.2125795E-01  -.1973990E-01  -.1825293E-01
  -.1690540E-01  -.1571695E-01  -.1463258E-01  -.1356857E-01  -.1245443E-01
  -.1125085E-01  -.9990011E-02  -.8731031E-02  -.7530788E-02  -.6414585E-02
  -.5387831E-02  -.4440772E-02  -.3568893E-02  -.2767718E-02  -.2081464E-02
  -.1585195E-02  -.1328851E-02  -.1349830E-02  -.1705904E-02  -.2430480E-02
  -.3478133E-02  -.4732983E-02  -.6038583E-02  -.7255045E-02  -.8300188E-02
  -.9124522E-02  -.9693877E-02  -.1001903E-01  -.1015479E-01  -.1017256E-01
  -.1009429E-01  -.9904569E-02  -.9583301E-02  -.9095938E-02  -.8438703E-02
  -.7629137E-02  -.6707281E-02  -.5683415E-02  -.4550486E-02  -.3312322E-02
  -.1948797E-02  -.3396213E-03   .1585203E-02   .3667564E-02   .5640407E-02
   .7298312E-02   .8564094E-02   .9472830E-02   .1015411E-01   .1077950E-01
   .1149745E-01   .1239326E-01   .1347741E-01   .1470207E-01   .1598566E-01
   .1725111E-01   .1842891E-01   .1941673E-01   .2003479E-01   .2013085E-01
   .1967576E-01   .1875758E-01   .1743764E-01   .1574813E-01   .1376427E-01
   .1162844E-01   .9578838E-02   .7861366E-02   .6633740E-02   .5921972E-02
   .5629372E-02   .5575792E-02   .5568549E-02   .5447100E-02   .5116424E-02
   .4552230E-02   .3794470E-02   .2918347E-02   .2015253E-02   .1161498E-02
   .3794174E-03  -.3937558E-03  -.1244933E-02  -.2226592E-02  -.3350382E-02
  -.4611539E-02  -.5993289E-02  -.7462830E-02  -.8979554E-02  -.1053669E-01
  -.1214671E-01  -.1380909E-01  -.1545015E-01  -.1694404E-01  -.1820049E-01
  -.1919218E-01  -.1991429E-01  -.2036175E-01  -.2055247E-01  -.2048902E-01
  -.2017411E-01  -.1964860E-01  -.1896507E-01  -.1815337E-01  -.1723097E-01
  -.1622283E-01  -.1515522E-01  -.1404679E-01  -.1285109E-01  -.1144433E-01
  -.9727598E-02  -.7683386E-02  -.5452081E-02  -.3267547E-02  -.1331320E-02
   .2557334E-03   .1469105E-02   .2339321E-02   .2949334E-02   .3399804E-02
   .3704378E-02   .3803873E-02   .3668933E-02   .3255264E-02   .2516486E-02
   .1451027E-02   .1301833E-03  -.1253044E-02  -.2456147E-02  -.3298667E-02
  -.3682921E-02  -.3611903E-02  -.3185805E-02  -.2527264E-02  -.1735896E-02
  -.8819586E-03  -.2697794E-04   .7858026E-03   .1512658E-02   .2124229E-02
   .2621309E-02   .3039119E-02   .3414584E-02   .3782368E-02   .4161442E-02
   .4564424E-02   .4967253E-02   .5312928E-02   .5557708E-02   .5685063E-02
   .5700018E-02   .5617419E-02   .5466180E-02   .5277533E-02   .5073373E-02
   .4871695E-02   .4662693E-02   .4429683E-02   .4160863E-02   .3851220E-02
   .3506124E-02   .3120738E-02   .2684863E-02   .2196070E-02   .1664567E-02
   .1103827E-02   .4980521E-03  -.1885815E-03  -.9670783E-03  -.1830777E-02
  -.2748162E-02  -.3685008E-02  -.4615434E-02  -.5602247E-02  -.6774310E-02
  -.8214660E-02  -.9925086E-02  -.1172116E-01  -.1332854E-01  -.1455735E-01
  -.1534296E-01  -.1572320E-01  -.1577684E-01  -.1555062E-01  -.1502322E-01
  -.1420151E-01  -.1314748E-01  -.1196648E-01  -.1076163E-01  -.9609186E-02
  -.8535014E-02  -.7528630E-02  -.6556609E-02  -.5578463E-02  -.4543514E-02
  -.3356178E-02  -.1923990E-02  -.2191245E-03   .1693250E-02   .3630387E-02
   .5373174E-02   .6778345E-02   .7739200E-02   .8190959E-02   .8107089E-02
   .7513645E-02   .6526796E-02   .5294876E-02   .3969083E-02   .2676066E-02
   .1560398E-02   .7590958E-03   .3262951E-03   .2180545E-03   .3312771E-03
   .5544184E-03   .7953278E-03   .9884197E-03   .1092023E-02   .1095906E-02
   .1015093E-02   .8864900E-03   .7508129E-03   .6485547E-03   .6103322E-03
   .6478237E-03   .7602473E-03   .9333146E-03   .1145786E-02   .1375553E-02
   .1618736E-02   .1890423E-02   .2193995E-02   .2528598E-02   .2883124E-02
   .3266327E-02   .3722998E-02   .4298316E-02   .5005506E-02   .5815861E-02
   .6633718E-02   .7321860E-02   .7775229E-02   .7876576E-02   .7510972E-02
   .6631033E-02   .5228289E-02   .3337772E-02   .1088914E-02  -.1323612E-02
  -.3664932E-02  -.5742331E-02  -.7470201E-02  -.8862060E-02  -.9999890E-02
  -.1100363E-01  -.1199271E-01  -.1305954E-01  -.1423789E-01  -.1550226E-01
  -.1679472E-01  -.1805779E-01  -.1922687E-01  -.2018870E-01  -.2082739E-01
  -.2109674E-01  -.2096393E-01  -.2042112E-01  -.1952989E-01  -.1839718E-01
  -.1712429E-01  -.1579793E-01  -.1447723E-01  -.1320041E-01  -.1198604E-01
  -.1083962E-01  -.9759592E-02  -.8726300E-02  -.7710092E-02  -.6683769E-02
  -.5655037E-02  -.4670304E-02  -.3777719E-02  -.2997894E-02  -.2323071E-02
  -.1735246E-02  -.1214428E-02  -.7440144E-03  -.3097981E-03   .1015684E-03
   .4958829E-03   .8796175E-03   .1252380E-02   .1611938E-02   .1966252E-02
   .2321061E-02   .2680288E-02   .3044389E-02   .3411334E-02   .3791060E-02
   .4203646E-02   .4671104E-02   .5195012E-02   .5767808E-02   .6390307E-02
   .7066914E-02   .7791020E-02   .8546450E-02   .9312298E-02   .1006770E-01
   .1079343E-01   .1148240E-01   .1212877E-01   .1273811E-01   .1329302E-01
   .1374170E-01   .1401976E-01   .1406802E-01   .1372705E-01   .1290240E-01
   .1167411E-01   .1020101E-01   .8660800E-02   .7157079E-02   .5706414E-02
   .4273960E-02   .2820986E-02   .1316165E-02  -.2427436E-03  -.1825802E-02
  -.3300391E-02  -.4512960E-02  -.5385324E-02  -.5933297E-02  -.6217909E-02
  -.6309041E-02  -.6284807E-02  -.6217712E-02  -.6164932E-02  -.6158793E-02
  -.6205693E-02  -.6297341E-02  -.6408111E-02  -.6494664E-02  -.6511883E-02
  -.6427484E-02  -.6237373E-02  -.5955155E-02  -.5608689E-02  -.5196441E-02
  -.4690879E-02  -.4072622E-02  -.3346258E-02  -.2531258E-02  -.1617553E-02
  -.5667821E-03   .6304051E-03   .1948983E-02   .3340253E-02   .4744501E-02
   .6069522E-02   .7236164E-02   .8204421E-02   .8995144E-02   .9651088E-02
   .1023680E-01   .1080235E-01   .1137519E-01   .1195418E-01   .1253196E-01
   .1309659E-01   .1363949E-01   .1415406E-01   .1464008E-01   .1510959E-01
   .1557365E-01   .1604186E-01   .1651248E-01   .1698284E-01   .1742359E-01
   .1780026E-01   .1809139E-01   .1830108E-01   .1844520E-01   .1855307E-01
   .1864782E-01   .1874419E-01   .1884558E-01   .1895073E-01   .1904785E-01
   .1910332E-01   .1905178E-01   .1884902E-01   .1847941E-01   .1794528E-01
   .1724178E-01   .1637680E-01   .1538781E-01   .1432601E-01   .1324074E-01
   .1216278E-01   .1110180E-01   .1006057E-01   .9036160E-02   .8023462E-02
   .7023504E-02   .6063013E-02   .5171051E-02   .4361682E-02   .3621896E-02
   .2914372E-02   .2004178E-02   .6077836E-03  -.1284106E-02  -.3462141E-02
  -.5648601E-02  -.7609688E-02  -.9216239E-02  -.1044597E-01  -.1136465E-01
  -.1207955E-01  -.1271422E-01  -.1336497E-01  -.1406533E-01  -.1478288E-01
  -.1543927E-01  -.1589452E-01  -.1602966E-01  -.1580184E-01  -.1525080E-01
  -.1437386E-01  -.1312761E-01  -.1150589E-01  -.9566754E-02  -.7407624E-02
  -.5147706E-02  -.2904538E-02  -.8016109E-03   .1078725E-02   .2716553E-02
   .4123126E-02   .5278470E-02   .6173413E-02   .6833498E-02   .7285556E-02
   .7543142E-02   .7584940E-02   .7383512E-02   .6958476E-02   .6372934E-02
   .5739977E-02   .5161698E-02   .4698801E-02   .4356818E-02   .4103394E-02
   .3884901E-02   .3633023E-02   .3283923E-02   .2803554E-02   .2193183E-02
   .1478229E-02   .6971861E-03  -.7613587E-04  -.7245037E-03  -.1134396E-02
  -.1266720E-02  -.1144039E-02  -.8331727E-03  -.4222395E-03  -.6685481E-06
   .3696585E-03   .6523161E-03   .8330868E-03   .9017066E-03   .8677476E-03
   .7361350E-03   .4834096E-03   .6031132E-04  -.5862468E-03  -.1480424E-02
  -.2588648E-02  -.3845377E-02  -.5184992E-02  -.6570038E-02  -.7974018E-02
  -.9379492E-02  -.1076130E-01  -.1209229E-01  -.1332657E-01  -.1436899E-01
  -.1513420E-01  -.1560731E-01  -.1581112E-01  -.1576265E-01  -.1548532E-01
  -.1502340E-01  -.1437051E-01  -.1344662E-01  -.1218640E-01  -.1059226E-01
  -.8772904E-02  -.6885110E-02  -.5084253E-02  -.3466008E-02  -.2109863E-02
  -.1077361E-02  -.3644984E-03   .1036880E-03   .4382865E-03   .7380628E-03
   .1058659E-02   .1420355E-02   .1765419E-02   .2006005E-02   .2078424E-02
   .1961164E-02   .1673445E-02   .1251324E-02   .7473445E-03   .2124843E-03
  -.2880792E-03  -.7058069E-03  -.1017253E-02  -.1230771E-02  -.1351918E-02
  -.1370171E-02  -.1279203E-02  -.1094730E-02  -.8391426E-03  -.5064448E-03
  -.7942610E-04   .4451514E-03   .1050112E-02   .1727215E-02   .2487532E-02
   .3341288E-02   .4277218E-02   .5242808E-02   .6177947E-02   .7026702E-02
   .7727506E-02   .8234998E-02   .8549521E-02   .8714102E-02   .8777531E-02
   .8792645E-02   .8790299E-02   .8789397E-02   .8788024E-02   .8771149E-02
   .8723512E-02   .8637306E-02   .8502899E-02   .8322855E-02   .8092371E-02
   .7819049E-02   .7507279E-02   .7175831E-02   .6833074E-02   .6485765E-02
   .6128295E-02   .5748570E-02   .5339056E-02   .4896369E-02   .4399920E-02
   .3848471E-02   .3246533E-02   .2607660E-02   .1911146E-02   .1065830E-02
  -.2747340E-04  -.1397326E-02  -.2992148E-02  -.4722767E-02  -.6477353E-02
  -.8106371E-02  -.9461421E-02  -.1047621E-01  -.1117857E-01  -.1165108E-01
  -.1198347E-01  -.1223206E-01  -.1244172E-01  -.1264339E-01  -.1281397E-01
  -.1289243E-01  -.1284272E-01  -.1266126E-01  -.1237022E-01  -.1201535E-01
  -.1163588E-01  -.1125837E-01  -.1088881E-01  -.1053275E-01  -.1018056E-01
  -.9823816E-02  -.9464340E-02  -.9115560E-02  -.8783792E-02  -.8479676E-02
  -.8204436E-02  -.7957343E-02  -.7707349E-02  -.7417251E-02  -.7062554E-02
  -.6639996E-02  -.6169853E-02  -.5681783E-02  -.5213639E-02  -.4799805E-02
  -.4444347E-02  -.4147796E-02  -.3887860E-02  -.3640739E-02  -.3391148E-02
  -.3122425E-02  -.2832230E-02  -.2519267E-02  -.2189032E-02  -.1828286E-02
  -.1423705E-02  -.9733653E-03  -.4780859E-03   .4295533E-04   .5650614E-03
   .1054707E-02   .1481088E-02   .1833582E-02   .2119801E-02   .2357011E-02
   .2569236E-02   .2774810E-02   .2987017E-02   .3212585E-02   .3453407E-02
   .3702743E-02   .3952666E-02   .4188889E-02   .4401344E-02   .4588236E-02
   .4752461E-02   .4900215E-02   .5028790E-02   .5135561E-02   .5220347E-02
   .5279546E-02   .5298701E-02   .5238814E-02   .5071819E-02   .4804357E-02
   .4453545E-02   .4052292E-02   .3623984E-02   .3200702E-02   .2795151E-02
   .2411756E-02   .2045984E-02   .1684573E-02   .1321173E-02   .9660304E-03
   .6478083E-03   .3777944E-03   .1862677E-03   .1018659E-03   .1392668E-03
   .2902238E-03   .5343965E-03   .8477098E-03   .1200100E-02   .1566457E-02
   .1922205E-02   .2257425E-02   .2566755E-02   .2865577E-02   .3178225E-02
   .3530963E-02   .3939443E-02   .4404002E-02   .4915316E-02   .5461437E-02
   .6043896E-02   .6683038E-02   .7384367E-02   .8133297E-02   .8904069E-02
   .9662505E-02   .1038655E-01   .1105841E-01   .1165846E-01   .1215384E-01
   .1253201E-01   .1280022E-01   .1298884E-01   .1313702E-01   .1326665E-01
   .1338538E-01   .1349220E-01   .1358865E-01   .1367026E-01   .1373421E-01
   .1376388E-01   .1375357E-01   .1370324E-01   .1361186E-01   .1349116E-01
   .1334935E-01   .1318988E-01   .1301851E-01   .1283158E-01   .1263711E-01
   .1243755E-01   .1224041E-01   .1204888E-01   .1186384E-01   .1168416E-01
   .1150695E-01   .1133280E-01   .1115892E-01   .1098834E-01   .1083151E-01
   .1068514E-01   .1055631E-01   .1043375E-01   .1031115E-01   .1016409E-01
   .9979389E-02   .9744329E-02   .9426251E-02   .8957304E-02   .8288203E-02
   .7423906E-02   .6409089E-02   .5310291E-02   .4197167E-02   .3123902E-02
   .2119017E-02   .1185379E-02   .3129178E-03  -.5261035E-03  -.1369572E-02
  -.2256156E-02  -.3204011E-02  -.4219314E-02  -.5286674E-02  -.6372881E-02
  -.7441354E-02  -.8456755E-02  -.9402118E-02  -.1027600E-01  -.1108774E-01
  -.1185491E-01  -.1259536E-01  -.1330316E-01  -.1395698E-01  -.1455296E-01
  -.1509219E-01  -.1557664E-01  -.1601092E-01  -.1638835E-01  -.1669392E-01
  -.1692445E-01  -.1708238E-01  -.1717157E-01  -.1719175E-01  -.1712893E-01
  -.1696967E-01  -.1671573E-01  -.1637020E-01  -.1593774E-01  -.1541977E-01
  -.1483480E-01  -.1419622E-01  -.1351015E-01  -.1278769E-01  -.1204374E-01
  -.1129694E-01  -.1056138E-01  -.9849103E-02  -.9166664E-02  -.8511177E-02
  -.7878234E-02  -.7284767E-02  -.6756199E-02  -.6302157E-02  -.5912499E-02
  -.5573231E-02  -.5285227E-02  -.5086349E-02  -.5000043E-02  -.5029050E-02
  -.5157358E-02  -.5348689E-02  -.5563485E-02  -.5775939E-02  -.5967689E-02
  -.6136438E-02  -.6288649E-02  -.6435604E-02  -.6590726E-02  -.6764126E-02
  -.6976780E-02  -.7256044E-02  -.7617109E-02  -.8054696E-02  -.8522671E-02
  -.8948792E-02  -.9283091E-02  -.9504727E-02  -.9624910E-02  -.9677456E-02
  -.9708808E-02  -.9757608E-02  -.9852233E-02  -.1001748E-01  -.1026082E-01
  -.1057753E-01  -.1094078E-01  -.1131735E-01  -.1166653E-01  -.1195549E-01
  -.1216800E-01  -.1230351E-01  -.1234830E-01  -.1227248E-01  -.1206359E-01
  -.1173871E-01  -.1132150E-01  -.1079344E-01  -.1011932E-01  -.9289649E-02
  -.8306836E-02  -.7148112E-02  -.5798877E-02  -.4312828E-02  -.2786037E-02
  -.1328987E-02  -.5592950E-04   .9567602E-03   .1712649E-02   .2264238E-02
   .2702664E-02   .3115061E-02   .3562744E-02   .4059629E-02   .4566876E-02
   .5039445E-02   .5449304E-02   .5784186E-02   .6052256E-02   .6291557E-02
   .6554604E-02   .6871319E-02   .7248649E-02   .7676366E-02   .8134326E-02
   .8595869E-02   .9040004E-02   .9449227E-02   .9816355E-02   .1013355E-01
   .1040588E-01   .1064538E-01   .1086652E-01   .1106238E-01   .1121611E-01
   .1131678E-01   .1137137E-01   .1139367E-01   .1139589E-01   .1138347E-01
   .1135655E-01   .1128098E-01   .1110235E-01   .1078308E-01   .1032387E-01
   .9749118E-02   .9073292E-02   .8276995E-02   .7346130E-02   .6294631E-02
   .5164638E-02   .4015984E-02   .2911753E-02   .1891708E-02   .1022810E-02
   .3704214E-03  -.5009008E-04  -.2803024E-03  -.3883233E-03  -.4323303E-03
  -.4493903E-03  -.4609711E-03  -.4850826E-03  -.5222494E-03  -.5638366E-03
  -.5977508E-03  -.6066112E-03  -.5797614E-03  -.5140363E-03  -.4234511E-03
  -.3347007E-03  -.2796218E-03  -.3335649E-03  -.5680238E-03  -.1013373E-02
  -.1675573E-02  -.2547601E-02  -.3585922E-02  -.4763300E-02  -.6073706E-02
  -.7492285E-02  -.8947160E-02  -.1031392E-01  -.1150849E-01  -.1249851E-01
  -.1330467E-01  -.1396627E-01  -.1452846E-01  -.1503879E-01  -.1552245E-01
  -.1595325E-01  -.1625585E-01  -.1634012E-01  -.1614851E-01  -.1567151E-01
  -.1490491E-01  -.1387358E-01  -.1263706E-01  -.1128176E-01  -.9898227E-02
  -.8566383E-02  -.7331148E-02  -.6209801E-02  -.5233960E-02  -.4427878E-02
  -.3787251E-02  -.3307887E-02  -.3001967E-02  -.2873097E-02  -.2894399E-02
  -.3021640E-02  -.3201876E-02  -.3402704E-02  -.3596214E-02  -.3751100E-02
  -.3839489E-02  -.3852670E-02  -.3771827E-02  -.3571518E-02  -.3262673E-02
  -.2866689E-02  -.2408433E-02  -.1875869E-02  -.1260182E-02  -.5673268E-03
   .1798397E-03   .9245423E-03   .1586270E-02   .2091507E-02   .2372359E-02
   .2353106E-02   .2011127E-02   .1391714E-02   .5980359E-03  -.2613447E-03
  -.1085904E-02  -.1799851E-02  -.2346945E-02  -.2715511E-02  -.2932963E-02
  -.3062392E-02  -.3151972E-02  -.3235325E-02  -.3327867E-02  -.3435951E-02
  -.3565098E-02  -.3698877E-02  -.3790661E-02  -.3780621E-02  -.3637360E-02
  -.3363188E-02  -.2979997E-02  -.2502357E-02  -.1948937E-02  -.1337929E-02
  -.6956140E-03  -.4726561E-04   .5863422E-03   .1182883E-02   .1724181E-02
   .2204644E-02   .2624187E-02   .2971904E-02   .3233026E-02   .3411244E-02
   .3526219E-02   .3607241E-02   .3682246E-02   .3771864E-02   .3882009E-02
   .4010016E-02   .4146512E-02   .4283977E-02   .4409936E-02   .4539654E-02
   .4711977E-02   .4948255E-02   .5257358E-02   .5608537E-02   .5961286E-02
   .6284116E-02   .6553364E-02   .6773254E-02   .6948387E-02   .7079908E-02
   .7149969E-02   .7156016E-02   .7102384E-02   .7008674E-02   .6896243E-02
   .6784550E-02   .6682200E-02   .6594316E-02   .6517442E-02   .6447201E-02
   .6379151E-02   .6310576E-02   .6233112E-02   .6151105E-02   .6071999E-02
   .6008842E-02   .5964701E-02   .5941837E-02   .5933885E-02   .5933212E-02
   .5932536E-02   .5927385E-02   .5915070E-02   .5897281E-02   .5888899E-02
   .5914559E-02   .5985543E-02   .6101621E-02   .6253938E-02   .6430174E-02
   .6614116E-02   .6798900E-02   .6980194E-02   .7154618E-02   .7324318E-02
   .7498285E-02   .7711529E-02   .8002961E-02   .8391578E-02   .8868922E-02
   .9406738E-02   .9967695E-02   .1051384E-01   .1101979E-01   .1146022E-01
   .1178775E-01   .1195334E-01   .1194327E-01   .1175693E-01   .1137811E-01
   .1079399E-01   .1003065E-01   .9139709E-02   .8160741E-02   .7080600E-02
   .5870709E-02   .4532758E-02   .3161735E-02   .1935402E-02   .1008406E-02
   .4339001E-03   .1706878E-03   .1115459E-03   .1304280E-03   .1015991E-03
  -.7745831E-04  -.4595276E-03  -.1035915E-02  -.1756422E-02  -.2552815E-02
  -.3345904E-02  -.4072219E-02  -.4666442E-02  -.5080356E-02  -.5305970E-02
  -.5378830E-02  -.5350354E-02  -.5246971E-02  -.5052662E-02  -.4761838E-02
  -.4386961E-02  -.3979771E-02  -.3601003E-02  -.3292896E-02  -.3068392E-02
  -.2915538E-02  -.2805192E-02  -.2702870E-02  -.2579177E-02  -.2413066E-02
  -.2194911E-02  -.1930065E-02  -.1628247E-02  -.1309476E-02  -.9892272E-03
  -.6855056E-03  -.4051674E-03  -.1534574E-03   .6635249E-04   .2486763E-03
   .3968740E-03   .5182176E-03   .6236140E-03   .7264585E-03   .8326875E-03
   .9479515E-03   .1060097E-02   .1147366E-02   .1186549E-02   .1171666E-02
   .1107667E-02   .1008619E-02   .8926449E-03   .7740326E-03   .6648244E-03
   .5667598E-03   .4786453E-03   .3938582E-03   .3107622E-03   .2215557E-03
   .1244925E-03   .2183397E-04  -.8534505E-04  -.1985729E-03  -.3108888E-03
  -.4164443E-03  -.5066981E-03  -.5762806E-03  -.6259282E-03  -.6576276E-03
  -.6677789E-03  -.6397733E-03  -.5527727E-03  -.4024596E-03  -.1985494E-03
   .4747161E-04   .3524169E-03   .7423593E-03   .1222895E-02   .1777747E-02
   .2384438E-02   .3021428E-02   .3690581E-02   .4384039E-02   .5094753E-02
   .5779731E-02   .6384555E-02   .6884942E-02   .7276192E-02   .7588647E-02
   .7851112E-02   .8098340E-02   .8346069E-02   .8597847E-02   .8851894E-02
   .9093563E-02   .9300281E-02   .9446910E-02   .9522529E-02   .9534263E-02
   .9495265E-02   .9423885E-02   .9334363E-02   .9216183E-02   .9049162E-02
   .8821031E-02   .8527769E-02   .8136200E-02   .7579347E-02   .6809830E-02
   .5872309E-02   .4874360E-02   .3921322E-02   .3083279E-02   .2384519E-02
   .1809176E-02   .1307423E-02   .7999662E-03   .2069510E-03  -.5123243E-03
  -.1360109E-02  -.2308697E-02  -.3315898E-02  -.4340073E-02  -.5344578E-02
  -.6305593E-02  -.7198919E-02  -.8002208E-02  -.8700900E-02  -.9286958E-02
  -.9714671E-02  -.9934425E-02  -.9939659E-02  -.9771296E-02  -.9491963E-02
  -.9161091E-02  -.8828833E-02  -.8524645E-02  -.8267770E-02  -.8052744E-02
  -.7855576E-02  -.7589984E-02  -.7129071E-02  -.6405468E-02  -.5420572E-02
  -.4236341E-02  -.2944509E-02  -.1655760E-02  -.5003291E-03   .4233248E-03
   .1085513E-02   .1519292E-02   .1784671E-02   .1884742E-02   .1804195E-02
   .1549610E-02   .1158031E-02   .6427015E-03  -.3207233E-04  -.8976933E-03
  -.1943825E-02  -.3106920E-02  -.4282806E-02  -.5382159E-02  -.6357798E-02
  -.7205777E-02  -.7954061E-02  -.8602728E-02  -.9118156E-02  -.9481497E-02
  -.9711490E-02  -.9853194E-02  -.9954250E-02  -.1004390E-01  -.1008147E-01
  -.9997914E-02  -.9749248E-02  -.9333439E-02  -.8778535E-02  -.8107214E-02
  -.7328390E-02  -.6463417E-02  -.5540380E-02  -.4596273E-02  -.3684082E-02
  -.2875246E-02  -.2216604E-02  -.1720702E-02  -.1388855E-02  -.1239537E-02
  -.1251265E-02  -.1389876E-02  -.1605533E-02  -.1881241E-02  -.2227919E-02
  -.2643347E-02  -.3121033E-02  -.3635280E-02  -.4177818E-02  -.4738200E-02
  -.5324591E-02  -.5938153E-02  -.6575958E-02  -.7233587E-02  -.7886728E-02
  -.8485800E-02  -.8984867E-02  -.9365482E-02  -.9638543E-02  -.9834099E-02
  -.9975811E-02  -.1005999E-01  -.1007636E-01  -.1002306E-01  -.9910835E-02
  -.9748991E-02  -.9529433E-02  -.9225284E-02  -.8833380E-02  -.8360991E-02
  -.7831087E-02  -.7263702E-02  -.6662319E-02  -.6015631E-02  -.5317879E-02
  -.4576630E-02  -.3807455E-02  -.3024929E-02  -.2245030E-02  -.1481599E-02
  -.7552278E-03  -.8583359E-04   .5095836E-03   .1041118E-02   .1521428E-02
   .1976408E-02   .2423207E-02   .2878138E-02   .3348064E-02   .3833457E-02
   .4328754E-02   .4826793E-02   .5318381E-02   .5793809E-02   .6250249E-02
   .6656603E-02   .6977375E-02   .7176334E-02   .7254524E-02   .7230224E-02
   .7119532E-02   .6926854E-02   .6672839E-02   .6377754E-02   .6065770E-02
   .5765198E-02   .5490105E-02   .5246213E-02   .5030610E-02   .4850729E-02
   .4756521E-02   .4804800E-02   .5022605E-02   .5388111E-02   .5852544E-02
   .6368103E-02   .6895969E-02   .7412557E-02   .7904107E-02   .8365411E-02
   .8803544E-02   .9227930E-02   .9642386E-02   .1004290E-01   .1042786E-01
   .1080160E-01   .1116580E-01   .1152806E-01   .1188946E-01   .1224738E-01
   .1257023E-01   .1280453E-01   .1291776E-01   .1284585E-01   .1250048E-01
   .1185399E-01   .1095717E-01   .9915513E-02   .8840191E-02   .7822971E-02
   .6912619E-02   .6176463E-02   .5667531E-02   .5389705E-02   .5294682E-02
   .5335671E-02   .5484405E-02   .5700356E-02   .5941620E-02   .6170426E-02
   .6364693E-02   .6517789E-02   .6635076E-02   .6728826E-02   .6818720E-02
   .6920666E-02   .7051048E-02   .7216237E-02   .7415650E-02   .7633643E-02
   .7851480E-02   .8055929E-02   .8235218E-02   .8385231E-02   .8506237E-02
   .8606133E-02   .8691023E-02   .8782067E-02   .8910407E-02   .9094558E-02
   .9334019E-02   .9616709E-02   .9919120E-02   .1019684E-01   .1039907E-01
   .1049872E-01   .1049819E-01   .1041872E-01   .1025544E-01   .9980768E-02
   .9579568E-02   .9064755E-02   .8472056E-02   .7835721E-02   .7183979E-02
   .6540330E-02   .5917505E-02   .5317750E-02   .4740002E-02   .4196944E-02
   .3699237E-02   .3252994E-02   .2846474E-02   .2460469E-02   .2066837E-02
   .1619667E-02   .1084233E-02   .4510767E-03  -.2623187E-03  -.1020476E-02
  -.1786763E-02  -.2532379E-02  -.3260744E-02  -.3990036E-02  -.4740318E-02
  -.5511798E-02  -.6305484E-02  -.7109421E-02  -.7913096E-02  -.8693545E-02
  -.9426147E-02  -.1009860E-01  -.1071097E-01  -.1128082E-01  -.1181564E-01
  -.1231707E-01  -.1274267E-01  -.1306417E-01  -.1327204E-01  -.1338346E-01
  -.1343007E-01  -.1344684E-01  -.1344538E-01  -.1340575E-01  -.1329781E-01
  -.1310618E-01  -.1283502E-01  -.1249835E-01  -.1212121E-01  -.1172770E-01
  -.1133507E-01  -.1095890E-01  -.1061109E-01  -.1029586E-01  -.1000561E-01
  -.9730473E-02  -.9457884E-02  -.9179045E-02  -.8873749E-02  -.8539370E-02
  -.8174533E-02  -.7786310E-02  -.7385083E-02  -.6962302E-02  -.6512847E-02
  -.6032632E-02  -.5529357E-02  -.5013125E-02  -.4492550E-02  -.3971139E-02
  -.3412691E-02  -.2781868E-02  -.2057837E-02  -.1247648E-02  -.3801374E-03
   .5108785E-03   .1390687E-02   .2234030E-02   .3025667E-02   .3763140E-02
   .4457123E-02   .5106834E-02   .5691693E-02   .6189887E-02   .6593685E-02
   .6893011E-02   .7090226E-02   .7197869E-02   .7220387E-02   .7131575E-02
   .6900623E-02   .6520341E-02   .6004857E-02   .5359105E-02   .4593138E-02
   .3767655E-02   .2965568E-02   .2258149E-02   .1673270E-02   .1204991E-02
   .8323345E-03   .5459221E-03   .3271903E-03   .1531992E-03  -.6806388E-05
  -.1791000E-03  -.3701090E-03  -.5511437E-03  -.6768760E-03  -.7153502E-03
  -.6562953E-03  -.5139406E-03  -.3150501E-03  -.9734120E-04   .1131304E-03
   .2971030E-03   .4572571E-03   .5987623E-03   .7303821E-03   .8570462E-03
   .9769706E-03   .1086390E-02   .1184320E-02   .1254544E-02   .1275744E-02
   .1238412E-02   .1146723E-02   .1013855E-02   .8540770E-03   .6822744E-03
   .4605537E-03   .1134239E-03  -.4070656E-03  -.1133218E-02  -.2065321E-02
  -.3174592E-02  -.4363971E-02  -.5449110E-02  -.6255635E-02  -.6706345E-02
  -.6817283E-02  -.6679926E-02  -.6401021E-02  -.6074810E-02  -.5777643E-02
  -.5556611E-02  -.5428651E-02  -.5393009E-02  -.5441990E-02  -.5550615E-02
  -.5680055E-02  -.5794961E-02  -.5875345E-02  -.5917500E-02  -.5930539E-02
  -.5920742E-02  -.5899760E-02  -.5864643E-02  -.5795417E-02  -.5677248E-02
  -.5506119E-02  -.5290529E-02  -.5029035E-02  -.4722416E-02  -.4379426E-02
  -.4012773E-02  -.3645454E-02  -.3291290E-02  -.2976069E-02  -.2722233E-02
  -.2533026E-02  -.2420836E-02  -.2406234E-02  -.2514294E-02  -.2740534E-02
  -.3061754E-02  -.3486024E-02  -.4053627E-02  -.4784131E-02  -.5666983E-02
  -.6663386E-02  -.7756156E-02  -.8919641E-02  -.1013433E-01  -.1136783E-01
  -.1258034E-01  -.1368199E-01  -.1457963E-01  -.1523910E-01  -.1567185E-01
  -.1589752E-01  -.1593908E-01  -.1584527E-01  -.1567406E-01  -.1547925E-01
  -.1527532E-01  -.1503514E-01  -.1473722E-01  -.1436804E-01  -.1393031E-01
  -.1342059E-01  -.1283430E-01  -.1217868E-01  -.1146578E-01  -.1072175E-01
  -.9962391E-02  -.9205381E-02  -.8449116E-02  -.7668398E-02  -.6851352E-02
  -.5994515E-02  -.5109813E-02  -.4212724E-02  -.3324377E-02  -.2453772E-02
  -.1588464E-02  -.6824644E-03   .3167905E-03   .1427278E-02   .2637975E-02
   .3913712E-02   .5213820E-02   .6503741E-02   .7779114E-02   .9049298E-02
   .1032726E-01   .1160444E-01   .1285566E-01   .1404572E-01   .1516497E-01
   .1621497E-01   .1720224E-01   .1812360E-01   .1893347E-01   .1958817E-01
   .2007305E-01   .2041077E-01   .2063952E-01   .2077751E-01   .2082682E-01
   .2079687E-01   .2070722E-01   .2055909E-01   .2034178E-01   .2003885E-01
   .1965214E-01   .1919852E-01   .1871731E-01   .1825485E-01   .1783587E-01
   .1747105E-01   .1714988E-01   .1687657E-01   .1666514E-01   .1652167E-01
   .1643576E-01   .1639117E-01   .1637901E-01   .1641443E-01   .1651054E-01
   .1666970E-01   .1687984E-01   .1712197E-01   .1737666E-01   .1762887E-01
   .1786566E-01   .1808536E-01   .1828036E-01   .1845766E-01   .1862184E-01
   .1878152E-01   .1891620E-01   .1899334E-01   .1898142E-01   .1887891E-01
   .1870016E-01   .1847386E-01   .1822242E-01   .1797513E-01   .1773787E-01
   .1751388E-01   .1725632E-01   .1689627E-01   .1639485E-01   .1575426E-01
   .1500950E-01   .1419454E-01   .1334103E-01   .1247287E-01   .1161307E-01
   .1077490E-01   .9964529E-02   .9184692E-02   .8434589E-02   .7714810E-02
   .7020475E-02   .6344167E-02   .5675595E-02   .5008971E-02   .4338733E-02
   .3664332E-02   .2983800E-02   .2285640E-02   .1554902E-02   .7846721E-03
  -.1597755E-04  -.8368546E-03  -.1658286E-02  -.2466559E-02  -.3246438E-02
  -.3971887E-02  -.4603028E-02  -.5109349E-02  -.5494321E-02  -.5780933E-02
  -.6010606E-02  -.6225269E-02  -.6471867E-02  -.6781772E-02  -.7166051E-02
  -.7609324E-02  -.8086954E-02  -.8563151E-02  -.9011894E-02  -.9402994E-02
  -.9726267E-02  -.9980899E-02  -.1018095E-01  -.1028947E-01  -.1025356E-01
  -.1005082E-01  -.9701321E-02  -.9256652E-02  -.8777568E-02  -.8316222E-02
  -.7906087E-02  -.7560603E-02  -.7276238E-02  -.7055894E-02  -.6902309E-02
  -.6807817E-02  -.6759399E-02  -.6768978E-02  -.6848312E-02  -.6994285E-02
  -.7196205E-02  -.7426934E-02  -.7676678E-02  -.7953878E-02  -.8273354E-02
  -.8641829E-02  -.9059284E-02  -.9508674E-02  -.9980467E-02  -.1045570E-01
  -.1092748E-01  -.1139510E-01  -.1188647E-01  -.1242720E-01  -.1302447E-01
  -.1367852E-01  -.1436851E-01  -.1507201E-01  -.1576818E-01  -.1644112E-01
  -.1706880E-01  -.1764822E-01  -.1817769E-01  -.1866878E-01  -.1913299E-01
  -.1958126E-01  -.2000154E-01  -.2036156E-01  -.2064480E-01  -.2085163E-01
  -.2099643E-01  -.2110202E-01  -.2119652E-01  -.2131762E-01  -.2149242E-01
  -.2172746E-01  -.2200745E-01  -.2229886E-01  -.2252733E-01  -.2260867E-01
  -.2250831E-01  -.2221850E-01  -.2172188E-01  -.2100743E-01  -.2010038E-01
  -.1905106E-01  -.1791697E-01  -.1674185E-01  -.1556398E-01  -.1441344E-01
  -.1329961E-01  -.1221829E-01  -.1112610E-01  -.9949682E-02  -.8635536E-02
  -.7176631E-02  -.5603045E-02  -.4000937E-02  -.2468559E-02  -.1076402E-02
   .1284645E-03   .1091078E-02   .1781861E-02   .2225862E-02   .2489311E-02
   .2653905E-02   .2768721E-02   .2857923E-02   .2935572E-02   .3003340E-02
   .3064929E-02   .3113604E-02   .3148629E-02   .3165087E-02   .3163263E-02
   .3144379E-02   .3106464E-02   .3050200E-02   .2977762E-02   .2894656E-02
   .2824261E-02   .2800803E-02   .2849096E-02   .2972527E-02   .3160470E-02
   .3387777E-02   .3633420E-02   .3876601E-02   .4125574E-02   .4404111E-02
   .4726023E-02   .5095833E-02   .5498123E-02   .5919307E-02   .6318774E-02
   .6667267E-02   .6946414E-02   .7162719E-02   .7328142E-02   .7469603E-02
   .7593137E-02   .7693436E-02   .7757386E-02   .7784701E-02   .7779845E-02
   .7743540E-02   .7667685E-02   .7538463E-02   .7355796E-02   .7122315E-02
   .6850019E-02   .6551286E-02   .6238176E-02   .5923843E-02   .5615310E-02
   .5317218E-02   .5038783E-02   .4787593E-02   .4562423E-02   .4357905E-02
   .4166918E-02   .3977978E-02   .3785101E-02   .3586802E-02   .3388797E-02
   .3196514E-02   .3017844E-02   .2852128E-02   .2701046E-02   .2558833E-02
   .2423764E-02   .2286213E-02   .2132168E-02   .1947825E-02   .1733343E-02
   .1494586E-02   .1241185E-02   .9756776E-03   .6773494E-03   .3330180E-03
  -.6490089E-04  -.5036562E-03  -.9788371E-03  -.1506217E-02  -.2090059E-02
  -.2737753E-02  -.3435121E-02  -.4144406E-02  -.4821456E-02  -.5435094E-02
  -.5970639E-02  -.6405437E-02  -.6710273E-02  -.6893241E-02  -.6978061E-02
  -.6983895E-02  -.6890316E-02  -.6671793E-02  -.6324397E-02  -.5873048E-02
  -.5354653E-02  -.4811890E-02  -.4273541E-02  -.3760853E-02  -.3270399E-02
  -.2798398E-02  -.2325642E-02  -.1819158E-02  -.1252429E-02  -.6143335E-03
   .8906267E-04   .8373949E-03   .1603834E-02   .2358257E-02   .3071940E-02
   .3725932E-02   .4310744E-02   .4828658E-02   .5264849E-02   .5614829E-02
   .5883837E-02   .6084009E-02   .6225973E-02   .6320016E-02   .6382546E-02
   .6429913E-02   .6472042E-02   .6517491E-02   .6570216E-02   .6625782E-02
   .6680732E-02   .6728376E-02   .6770767E-02   .6804298E-02   .6833297E-02
   .6857166E-02   .6878510E-02   .6905462E-02   .6982552E-02   .7155677E-02
   .7444545E-02   .7839638E-02   .8293640E-02   .8753146E-02   .9178501E-02
   .9545122E-02   .9861997E-02   .1018864E-01   .1060277E-01   .1112975E-01
   .1174703E-01   .1239680E-01   .1302891E-01   .1361073E-01   .1414263E-01
   .1466711E-01   .1522875E-01   .1580859E-01   .1632100E-01   .1669667E-01
   .1690344E-01   .1695757E-01   .1690266E-01   .1679559E-01   .1665129E-01
   .1644678E-01   .1614721E-01   .1574307E-01   .1525040E-01   .1469402E-01
   .1411457E-01   .1354736E-01   .1302039E-01   .1254961E-01   .1212670E-01
   .1173496E-01   .1135138E-01   .1095857E-01   .1054415E-01   .1010357E-01
   .9650101E-02   .9189973E-02   .8731058E-02   .8267894E-02   .7761089E-02
   .7154903E-02   .6431089E-02   .5598215E-02   .4697307E-02   .3767874E-02
   .2839326E-02   .1938641E-02   .1095773E-02   .3465964E-03  -.2940409E-03
  -.8381143E-03  -.1309773E-02  -.1738668E-02  -.2137861E-02  -.2517503E-02
  -.2885556E-02  -.3246164E-02  -.3601343E-02  -.3946134E-02  -.4242682E-02
  -.4432260E-02  -.4486329E-02  -.4410316E-02  -.4233818E-02  -.4001000E-02
  -.3761437E-02  -.3562440E-02  -.3428362E-02  -.3368886E-02  -.3365775E-02
  -.3396548E-02  -.3433574E-02  -.3456409E-02  -.3449687E-02  -.3411919E-02
  -.3369975E-02  -.3365123E-02  -.3428597E-02  -.3573482E-02  -.3787923E-02
  -.4055402E-02  -.4366900E-02  -.4708080E-02  -.5070783E-02  -.5440025E-02
  -.5805015E-02  -.6157109E-02  -.6479807E-02  -.6745366E-02  -.6936058E-02
  -.7049284E-02  -.7106701E-02  -.7130642E-02  -.7151308E-02  -.7183569E-02
  -.7242486E-02  -.7332353E-02  -.7460849E-02  -.7634459E-02  -.7848203E-02
  -.8088391E-02  -.8380812E-02  -.8761114E-02  -.9250362E-02  -.9837934E-02
  -.1049360E-01  -.1121216E-01  -.1201008E-01  -.1289980E-01  -.1387063E-01
  -.1487917E-01  -.1583600E-01  -.1664030E-01  -.1724209E-01  -.1765071E-01
  -.1791459E-01  -.1810626E-01  -.1830704E-01  -.1856927E-01  -.1892159E-01
  -.1936135E-01  -.1985940E-01  -.2037626E-01  -.2087857E-01  -.2133739E-01
  -.2173302E-01  -.2206640E-01  -.2234355E-01  -.2258118E-01  -.2279808E-01
  -.2301053E-01  -.2323101E-01  -.2346680E-01  -.2371641E-01  -.2395850E-01
  -.2416175E-01  -.2430401E-01  -.2434439E-01  -.2423742E-01  -.2396592E-01
  -.2354344E-01  -.2300638E-01  -.2235116E-01  -.2157273E-01  -.2066918E-01
  -.1968023E-01  -.1863811E-01  -.1755288E-01  -.1640995E-01  -.1520196E-01
  -.1393415E-01  -.1262595E-01  -.1130547E-01  -.1000806E-01  -.8770058E-02
  -.7611720E-02  -.6526412E-02  -.5500242E-02  -.4525280E-02  -.3623855E-02
  -.2828854E-02  -.2143981E-02  -.1559539E-02  -.1041660E-02  -.5635123E-03
  -.9452995E-04   .3788496E-03   .8527118E-03   .1328805E-02   .1789541E-02
   .2229937E-02   .2612366E-02   .2889955E-02   .3045888E-02   .3086766E-02
   .3031821E-02   .2897565E-02   .2705136E-02   .2477148E-02   .2239468E-02
   .2010573E-02   .1799543E-02   .1614111E-02   .1445950E-02   .1293685E-02
   .1144068E-02   .9918671E-03   .8251501E-03   .6295292E-03   .3930124E-03
   .1148889E-03  -.1943353E-03  -.5151830E-03  -.8238039E-03  -.1101328E-02
  -.1338697E-02  -.1540814E-02  -.1715314E-02  -.1878532E-02  -.2041675E-02
  -.2212236E-02  -.2398571E-02  -.2615330E-02  -.2877632E-02  -.3187871E-02
  -.3534766E-02  -.3904877E-02  -.4270670E-02  -.4607077E-02  -.4890282E-02
  -.5116048E-02  -.5289196E-02  -.5425230E-02  -.5526609E-02  -.5583491E-02
  -.5583897E-02  -.5527051E-02  -.5418265E-02  -.5253634E-02  -.5034729E-02
  -.4774470E-02  -.4482818E-02  -.4157471E-02  -.3794818E-02  -.3392553E-02
  -.2957041E-02  -.2500799E-02  -.2028579E-02  -.1503218E-02  -.8503358E-03
  -.2164674E-04   .9715805E-03   .2062818E-02   .3172282E-02   .4233989E-02
   .5229541E-02   .6107675E-02   .6796720E-02   .7267832E-02   .7548160E-02
   .7696041E-02   .7782527E-02   .7873401E-02   .8013120E-02   .8215190E-02
   .8486407E-02   .8818010E-02   .9204019E-02   .9631433E-02   .1008696E-01
   .1053871E-01   .1093500E-01   .1121875E-01   .1136695E-01   .1138538E-01
   .1131779E-01   .1121266E-01   .1112382E-01   .1108532E-01   .1111437E-01
   .1120979E-01   .1137037E-01   .1158246E-01   .1182422E-01   .1206791E-01
   .1228404E-01   .1246226E-01   .1259700E-01   .1269630E-01   .1278158E-01
   .1289291E-01   .1305716E-01   .1328934E-01   .1358163E-01   .1394223E-01
   .1437690E-01   .1487839E-01   .1539110E-01   .1583362E-01   .1613976E-01
   .1628762E-01   .1630055E-01   .1622318E-01   .1609271E-01   .1594466E-01
   .1579632E-01   .1563971E-01   .1545084E-01   .1520205E-01   .1488040E-01
   .1446947E-01   .1397487E-01   .1341256E-01   .1281141E-01   .1220396E-01
   .1163917E-01   .1115343E-01   .1076920E-01   .1052233E-01   .1044086E-01
   .1051968E-01   .1072273E-01   .1100580E-01   .1132623E-01   .1164962E-01
   .1194810E-01   .1220929E-01   .1243314E-01   .1262714E-01   .1280476E-01
   .1297972E-01   .1316517E-01   .1334516E-01   .1348963E-01   .1357804E-01
   .1360346E-01   .1354794E-01   .1338271E-01   .1310354E-01   .1272279E-01
   .1223803E-01   .1160838E-01   .1080553E-01   .9834468E-02   .8742918E-02
   .7591078E-02   .6441317E-02   .5338958E-02   .4300177E-02   .3322394E-02
   .2362677E-02   .1356547E-02   .2567657E-03  -.9213744E-03  -.2105350E-02
  -.3209654E-02  -.4184632E-02  -.5020159E-02  -.5730919E-02  -.6341087E-02
  -.6871572E-02  -.7353733E-02  -.7778768E-02  -.8110659E-02  -.8311963E-02
  -.8375204E-02  -.8318634E-02  -.8182671E-02  -.8006745E-02  -.7824902E-02
  -.7658535E-02  -.7520972E-02  -.7406220E-02  -.7312819E-02  -.7221056E-02
  -.7120023E-02  -.7001159E-02  -.6868611E-02  -.6743959E-02  -.6643027E-02
  -.6575635E-02  -.6537461E-02  -.6523005E-02  -.6520771E-02  -.6519301E-02
  -.6511126E-02  -.6491016E-02  -.6457124E-02  -.6413126E-02  -.6363311E-02
  -.6302992E-02  -.6218369E-02  -.6103016E-02  -.5953683E-02  -.5780878E-02
  -.5594556E-02  -.5406330E-02  -.5223726E-02  -.5051048E-02  -.4887996E-02
  -.4736233E-02  -.4584960E-02  -.4432649E-02  -.4268977E-02  -.4096160E-02
  -.3914743E-02  -.3729718E-02  -.3545158E-02  -.3366577E-02  -.3202909E-02
  -.3055702E-02  -.2925860E-02  -.2805954E-02  -.2696040E-02  -.2587123E-02
  -.2474136E-02  -.2351669E-02  -.2212059E-02  -.2051347E-02  -.1878615E-02
  -.1696243E-02  -.1515191E-02  -.1337918E-02  -.1173414E-02  -.1024726E-02
  -.8904168E-03  -.7676638E-03  -.6520753E-03  -.5514356E-03  -.4806992E-03
  -.4450933E-03  -.4465667E-03  -.4811906E-03  -.5490486E-03  -.6520280E-03
  -.7882227E-03  -.9486917E-03  -.1119546E-02  -.1303644E-02  -.1511307E-02
  -.1752890E-02  -.2035357E-02  -.2356926E-02  -.2717255E-02  -.3115061E-02
  -.3539573E-02  -.3976925E-02  -.4401804E-02  -.4785765E-02  -.5113811E-02
  -.5384300E-02  -.5611447E-02  -.5796578E-02  -.5939905E-02  -.6038353E-02
  -.6100011E-02  -.6121554E-02  -.6095772E-02  -.6025006E-02  -.5907680E-02
  -.5744509E-02  -.5537166E-02  -.5294296E-02  -.5029216E-02  -.4742355E-02
  -.4433313E-02  -.4086591E-02  -.3699484E-02  -.3281107E-02  -.2844409E-02
  -.2411949E-02  -.2000752E-02  -.1615769E-02  -.1259633E-02  -.9239197E-03
  -.6001570E-03  -.2829384E-03   .2101889E-04   .2911048E-03   .5173867E-03
   .6928389E-03   .8188928E-03   .9000369E-03   .9355729E-03   .9116181E-03
   .8169260E-03   .6426735E-03   .3887552E-03   .6745605E-04  -.2995803E-03
  -.6869061E-03  -.1095426E-02  -.1553209E-02  -.2077180E-02  -.2652038E-02
  -.3227932E-02  -.3762003E-02  -.4229063E-02  -.4596616E-02  -.4843313E-02
  -.4973189E-02  -.4995195E-02  -.4914652E-02  -.4748878E-02  -.4526191E-02
  -.4276036E-02  -.4008358E-02  -.3703152E-02  -.3336445E-02  -.2898498E-02
  -.2389909E-02  -.1817707E-02  -.1196025E-02  -.5442776E-03   .1229586E-03
   .8030457E-03   .1492877E-02   .2186394E-02   .2883006E-02   .3577116E-02
   .4274788E-02   .4977631E-02   .5692256E-02   .6411345E-02   .7106178E-02
   .7735053E-02   .8271007E-02   .8699735E-02   .9015821E-02   .9230852E-02
   .9372596E-02   .9473733E-02   .9557723E-02   .9631879E-02   .9695650E-02
   .9747912E-02   .9783503E-02   .9803889E-02   .9809713E-02   .9806217E-02
   .9795053E-02   .9779463E-02   .9770759E-02   .9789544E-02   .9846159E-02
   .9946959E-02   .1009999E-01   .1032929E-01   .1064013E-01   .1102374E-01
   .1146127E-01   .1194794E-01   .1248257E-01   .1305729E-01   .1362095E-01
   .1410410E-01   .1446223E-01   .1468935E-01   .1481006E-01   .1485530E-01
   .1485932E-01   .1484334E-01   .1480382E-01   .1471394E-01   .1456074E-01
   .1434651E-01   .1408234E-01   .1378352E-01   .1347016E-01   .1315001E-01
   .1283242E-01   .1251651E-01   .1220316E-01   .1188762E-01   .1156448E-01
   .1123672E-01   .1091953E-01   .1062752E-01   .1037047E-01   .1014581E-01
   .9945037E-02   .9761791E-02   .9589422E-02   .9427251E-02   .9281171E-02
   .9146402E-02   .9022149E-02   .8907468E-02   .8787647E-02   .8652750E-02
   .8487528E-02   .8283442E-02   .8052435E-02   .7803316E-02   .7545405E-02
   .7263857E-02   .6918987E-02   .6482384E-02   .5952595E-02   .5350858E-02
   .4709307E-02   .4061070E-02   .3428384E-02   .2830328E-02   .2264039E-02
   .1726833E-02   .1199750E-02   .6538681E-03   .6109995E-04  -.5953307E-03
  -.1313065E-02  -.2069945E-02  -.2820541E-02  -.3507112E-02  -.4095380E-02
  -.4578023E-02  -.4982784E-02  -.5358956E-02  -.5763273E-02  -.6225080E-02
  -.6757892E-02  -.7370106E-02  -.8061917E-02  -.8823538E-02  -.9626698E-02
  -.1043885E-01  -.1125066E-01  -.1206647E-01  -.1289873E-01  -.1374890E-01
  -.1461222E-01  -.1545864E-01  -.1624614E-01  -.1693725E-01  -.1752622E-01
  -.1802480E-01  -.1847047E-01  -.1890233E-01  -.1935789E-01  -.1984256E-01
  -.2030179E-01  -.2066006E-01  -.2087147E-01  -.2092781E-01  -.2084725E-01
  -.2065095E-01  -.2037095E-01  -.2002367E-01  -.1961304E-01  -.1912768E-01
  -.1857450E-01  -.1796553E-01  -.1731949E-01  -.1663595E-01  -.1590489E-01
  -.1512355E-01  -.1431465E-01  -.1353004E-01  -.1282384E-01  -.1222369E-01
  -.1172345E-01  -.1129808E-01  -.1091022E-01  -.1052382E-01  -.1010114E-01
  -.9611495E-02  -.9056482E-02  -.8440436E-02  -.7783483E-02  -.7110332E-02
  -.6435070E-02  -.5785868E-02  -.5188410E-02  -.4667402E-02  -.4225553E-02
  -.3848215E-02  -.3519187E-02  -.3209009E-02  -.2903898E-02  -.2600619E-02
  -.2306101E-02  -.2024786E-02  -.1759695E-02  -.1512573E-02  -.1278325E-02
  -.1054443E-02  -.8371526E-03  -.6197899E-03  -.4065990E-03  -.1964460E-03
   .1442347E-05   .1810542E-03   .3375577E-03   .4761194E-03   .5992683E-03
   .7319538E-03   .8909346E-03   .1089021E-02   .1328143E-02   .1620385E-02
   .2005715E-02   .2503922E-02   .3113483E-02   .3798506E-02   .4517483E-02
   .5229044E-02   .5923899E-02   .6619792E-02   .7309470E-02   .7932585E-02
   .8436340E-02   .8789160E-02   .8990983E-02   .9052618E-02   .9007245E-02
   .8896495E-02   .8755827E-02   .8587488E-02   .8367941E-02   .8082826E-02
   .7734936E-02   .7332939E-02   .6898530E-02   .6446922E-02   .5946407E-02
   .5314692E-02   .4489175E-02   .3451745E-02   .2276557E-02   .1105306E-02
   .6709655E-04  -.7621330E-03  -.1377525E-02  -.1825546E-02  -.2174513E-02
  -.2530604E-02  -.2998333E-02  -.3654251E-02  -.4511297E-02  -.5531713E-02
  -.6643215E-02  -.7756812E-02  -.8805026E-02  -.9747422E-02  -.1057307E-01
  -.1129144E-01  -.1193390E-01  -.1252429E-01  -.1309389E-01  -.1361409E-01
  -.1403387E-01  -.1432392E-01  -.1448686E-01  -.1453359E-01  -.1446989E-01
  -.1429603E-01  -.1402730E-01  -.1368855E-01  -.1330158E-01  -.1284765E-01
  -.1230990E-01  -.1167900E-01  -.1097162E-01  -.1020078E-01  -.9373688E-02
  -.8504945E-02  -.7610379E-02  -.6715881E-02  -.5840781E-02  -.5006538E-02
  -.4241466E-02  -.3558904E-02  -.2956453E-02  -.2417136E-02  -.1915539E-02
  -.1437805E-02  -.9605444E-03  -.4783429E-03   .1201417E-04   .5114482E-03
   .1034622E-02   .1601146E-02   .2218832E-02   .2886211E-02   .3601059E-02
   .4362970E-02   .5158910E-02   .5945779E-02   .6668796E-02   .7291752E-02
   .7806807E-02   .8229623E-02   .8581615E-02   .8891451E-02   .9191653E-02
   .9531264E-02   .9965289E-02   .1050564E-01   .1108831E-01   .1162588E-01
   .1205703E-01   .1235411E-01   .1253495E-01   .1263169E-01   .1269795E-01
   .1276631E-01   .1286009E-01   .1298306E-01   .1311732E-01   .1325306E-01
   .1337640E-01   .1346928E-01   .1352061E-01   .1351723E-01   .1346180E-01
   .1336359E-01   .1323828E-01   .1309719E-01   .1292751E-01   .1271814E-01
   .1245708E-01   .1215208E-01   .1182139E-01   .1149579E-01   .1119093E-01
   .1091893E-01   .1067768E-01   .1046425E-01   .1027184E-01   .1008687E-01
   .9903386E-02   .9711938E-02   .9512110E-02   .9316314E-02   .9142647E-02
   .9010340E-02   .8925784E-02   .8881317E-02   .8868535E-02   .8875047E-02
   .8888353E-02   .8897055E-02   .8901854E-02   .8900446E-02   .8895904E-02
   .8890762E-02   .8888934E-02   .8897756E-02   .8925989E-02   .8977010E-02
   .9046319E-02   .9128791E-02   .9214833E-02   .9296176E-02   .9378013E-02
   .9454859E-02   .9536133E-02   .9615937E-02   .9699247E-02   .9781933E-02
   .9884771E-02   .1003857E-01   .1025918E-01   .1053104E-01   .1080847E-01
   .1104653E-01   .1121266E-01   .1130329E-01   .1133224E-01   .1131393E-01
   .1124804E-01   .1112640E-01   .1094272E-01   .1066402E-01   .1024112E-01
   .9660778E-02   .8966588E-02   .8234681E-02   .7539618E-02   .6928622E-02
   .6414394E-02   .5987036E-02   .5613518E-02   .5268422E-02   .4953999E-02
   .4685519E-02   .4471575E-02   .4323457E-02   .4245720E-02   .4231096E-02
   .4261581E-02   .4322468E-02   .4400250E-02   .4493579E-02   .4593518E-02
   .4685694E-02   .4738729E-02   .4727763E-02   .4645803E-02   .4507905E-02
   .4340140E-02   .4158108E-02   .3978480E-02   .3790213E-02   .3593842E-02
   .3384665E-02   .3165142E-02   .2933472E-02   .2686377E-02   .2420093E-02
   .2133354E-02   .1831014E-02   .1517618E-02   .1196250E-02   .8719230E-03
   .5439685E-03   .2148376E-03  -.1107282E-03  -.4350692E-03  -.7524029E-03
  -.1051781E-02  -.1308732E-02  -.1495431E-02  -.1606415E-02  -.1650281E-02
  -.1648380E-02  -.1625576E-02  -.1596432E-02  -.1573731E-02  -.1564291E-02
  -.1571875E-02  -.1592194E-02  -.1639515E-02  -.1719670E-02  -.1832366E-02
  -.1971078E-02  -.2119288E-02  -.2267394E-02  -.2420027E-02  -.2601568E-02
  -.2822739E-02  -.3091385E-02  -.3415612E-02  -.3809577E-02  -.4262719E-02
  -.4765214E-02  -.5287733E-02  -.5814303E-02  -.6329506E-02  -.6869906E-02
  -.7496150E-02  -.8245100E-02  -.9127547E-02  -.1012826E-01  -.1121251E-01
  -.1233522E-01  -.1344100E-01  -.1446994E-01  -.1537116E-01  -.1613551E-01
  -.1678194E-01  -.1734484E-01  -.1785730E-01  -.1833042E-01  -.1878497E-01
  -.1923164E-01  -.1967823E-01  -.2011150E-01  -.2051021E-01  -.2085380E-01
  -.2113531E-01  -.2135809E-01  -.2153226E-01  -.2163943E-01  -.2166489E-01
  -.2160886E-01  -.2148022E-01  -.2130298E-01  -.2110296E-01  -.2090087E-01
  -.2071182E-01  -.2054234E-01  -.2039632E-01  -.2026824E-01  -.2014977E-01
  -.2003167E-01  -.1990413E-01  -.1975322E-01  -.1957069E-01  -.1934878E-01
  -.1909062E-01  -.1878955E-01  -.1844007E-01  -.1804179E-01  -.1760168E-01
  -.1710795E-01  -.1655592E-01  -.1594792E-01  -.1530146E-01  -.1460834E-01
  -.1385024E-01  -.1301684E-01  -.1212817E-01  -.1123819E-01  -.1039853E-01
  -.9636438E-02  -.8956047E-02  -.8341423E-02  -.7764299E-02  -.7193569E-02
  -.6615895E-02  -.6017908E-02  -.5410046E-02  -.4810284E-02  -.4229249E-02
  -.3678641E-02  -.3158877E-02  -.2662243E-02  -.2187742E-02  -.1743184E-02
  -.1364077E-02  -.1072736E-02  -.8764498E-03  -.7602210E-03  -.7013341E-03
  -.6914679E-03  -.7221117E-03  -.7811669E-03  -.8613759E-03  -.9497465E-03
  -.1037401E-02  -.1117310E-02  -.1183340E-02  -.1241535E-02  -.1292804E-02
  -.1340284E-02  -.1390168E-02  -.1446020E-02  -.1513950E-02  -.1599151E-02
  -.1702442E-02  -.1818002E-02  -.1939900E-02  -.2049654E-02  -.2120256E-02
  -.2135858E-02  -.2088056E-02  -.1991299E-02  -.1851156E-02  -.1668626E-02
  -.1439538E-02  -.1167297E-02  -.8538427E-03  -.4955015E-03  -.9161850E-04
   .3504030E-03   .8159060E-03   .1283463E-02   .1722255E-02   .2104390E-02
   .2423895E-02   .2685923E-02   .2907628E-02   .3100077E-02   .3266090E-02
   .3413649E-02   .3548896E-02   .3676579E-02   .3795769E-02   .3873083E-02
   .3870211E-02   .3768220E-02   .3566060E-02   .3273388E-02   .2906875E-02
   .2495017E-02   .2062332E-02   .1638463E-02   .1261492E-02   .9633054E-03
   .7518755E-03   .6150884E-03   .5257571E-03   .4827303E-03   .4933929E-03
   .5612875E-03   .6778485E-03   .8251383E-03   .9907301E-03   .1171061E-02
   .1364618E-02   .1568261E-02   .1782344E-02   .2009051E-02   .2253568E-02
   .2527310E-02   .2831849E-02   .3162944E-02   .3504461E-02   .3828972E-02
   .4115326E-02   .4353168E-02   .4542804E-02   .4684252E-02   .4783891E-02
   .4847422E-02   .4891401E-02   .4926635E-02   .4963739E-02   .5007075E-02
   .5058991E-02   .5114198E-02   .5170025E-02   .5216773E-02   .5253704E-02
   .5277956E-02   .5294616E-02   .5314153E-02   .5350167E-02   .5409216E-02
   .5490656E-02   .5589875E-02   .5699979E-02   .5810870E-02   .5920133E-02
   .6026506E-02   .6124969E-02   .6218552E-02   .6307813E-02   .6396507E-02
   .6488956E-02   .6596118E-02   .6726178E-02   .6875541E-02   .7037000E-02
   .7186572E-02   .7300762E-02   .7364121E-02   .7377995E-02   .7351032E-02
   .7288437E-02   .7175840E-02   .7006016E-02   .6783784E-02   .6521923E-02
   .6244135E-02   .5964976E-02   .5698614E-02   .5442105E-02   .5187705E-02
   .4927849E-02   .4656660E-02   .4374425E-02   .4079075E-02   .3769928E-02
   .3445853E-02   .3098984E-02   .2731436E-02   .2345002E-02   .1951048E-02
   .1559741E-02   .1184459E-02   .8375737E-03   .5168587E-03   .2204856E-03
  -.4209726E-04  -.2571267E-03  -.4159737E-03  -.5233963E-03  -.5922292E-03
  -.6397484E-03  -.6797097E-03  -.7269850E-03  -.7914196E-03  -.8740293E-03
  -.9748085E-03  -.1081433E-02  -.1189288E-02  -.1285602E-02  -.1368675E-02
  -.1455875E-02  -.1590371E-02  -.1818385E-02  -.2139370E-02  -.2515026E-02
  -.2894140E-02  -.3241648E-02  -.3530273E-02  -.3746116E-02  -.3870183E-02
  -.3903348E-02  -.3852946E-02  -.3722006E-02  -.3524638E-02  -.3281486E-02
  -.3017273E-02  -.2752837E-02  -.2503243E-02  -.2249445E-02  -.1949971E-02
  -.1570403E-02  -.1103035E-02  -.5593124E-03   .2951359E-04   .6231070E-03
   .1186010E-02   .1703010E-02   .2171413E-02   .2604060E-02   .3038974E-02
   .3512839E-02   .4051660E-02   .4651023E-02   .5276807E-02   .5868232E-02
   .6371117E-02   .6742284E-02   .6956326E-02   .7024182E-02   .6982514E-02
   .6875723E-02   .6736475E-02   .6598192E-02   .6475156E-02   .6375304E-02
   .6284303E-02   .6167651E-02   .6000913E-02   .5769660E-02   .5480717E-02
   .5144869E-02   .4776342E-02   .4388936E-02   .3998026E-02   .3613711E-02
   .3249240E-02   .2925616E-02   .2648077E-02   .2415230E-02   .2213632E-02
   .2030648E-02   .1855442E-02   .1698160E-02   .1564706E-02   .1457246E-02
   .1374295E-02   .1305472E-02   .1246804E-02   .1201692E-02   .1175836E-02
   .1184857E-02   .1228711E-02   .1302660E-02   .1396513E-02   .1500739E-02
   .1605500E-02   .1703357E-02   .1800182E-02   .1902136E-02   .2030251E-02
   .2193413E-02   .2389602E-02   .2611728E-02   .2844325E-02   .3080485E-02
   .3304973E-02   .3512809E-02   .3705630E-02   .3883391E-02   .4053478E-02
   .4220067E-02   .4378396E-02   .4512639E-02   .4609312E-02   .4663674E-02
   .4682228E-02   .4676090E-02   .4651934E-02   .4618843E-02   .4575243E-02
   .4526436E-02   .4474638E-02   .4417268E-02   .4356487E-02   .4293206E-02
   .4229074E-02   .4170204E-02   .4118946E-02   .4075506E-02   .4039019E-02
   .4002643E-02   .3965549E-02   .3921732E-02   .3868601E-02   .3805995E-02
   .3732825E-02   .3651052E-02   .3566809E-02   .3470908E-02   .3347631E-02
   .3193417E-02   .3006141E-02   .2777685E-02   .2489884E-02   .2127974E-02
   .1694605E-02   .1206092E-02   .6907658E-03   .1729291E-03  -.3284649E-03
  -.7741378E-03  -.1135916E-02  -.1396693E-02  -.1570279E-02  -.1684906E-02
  -.1775469E-02  -.1864703E-02  -.1964622E-02  -.2069306E-02  -.2177180E-02
  -.2279869E-02  -.2374929E-02  -.2456628E-02  -.2523765E-02  -.2572855E-02
  -.2603415E-02  -.2615437E-02  -.2611533E-02  -.2598159E-02  -.2578797E-02
  -.2556610E-02  -.2528296E-02  -.2475240E-02  -.2379748E-02  -.2233942E-02
  -.2046644E-02  -.1830241E-02  -.1601523E-02  -.1362999E-02  -.1102043E-02
  -.7842728E-03  -.4040832E-03   .2875221E-04   .5061189E-03   .1018527E-02
   .1557003E-02   .2116098E-02   .2683540E-02   .3246802E-02   .3795734E-02
   .4323713E-02   .4828754E-02   .5314702E-02   .5784521E-02   .6240651E-02
   .6679279E-02   .7098643E-02   .7497013E-02   .7857167E-02   .8164005E-02
   .8414361E-02   .8614657E-02   .8759545E-02   .8841278E-02   .8862354E-02
   .8833314E-02   .8770944E-02   .8685791E-02   .8575917E-02   .8441970E-02
   .8280775E-02   .8076786E-02   .7802909E-02   .7445363E-02   .7009316E-02
   .6492930E-02   .5894756E-02   .5251299E-02   .4622440E-02   .4058537E-02
   .3585185E-02   .3203663E-02   .2899680E-02   .2648010E-02   .2415181E-02
   .2171720E-02   .1895808E-02   .1579455E-02   .1227090E-02   .8489170E-03
   .4392152E-03  -.1748821E-04  -.5276598E-03  -.1080574E-02  -.1681890E-02
  -.2347405E-02  -.3089346E-02  -.3883121E-02  -.4673492E-02  -.5411139E-02
  -.6076778E-02  -.6670036E-02  -.7232636E-02  -.7831187E-02  -.8514594E-02
  -.9295308E-02  -.1013958E-01  -.1100379E-01  -.1183086E-01  -.1255918E-01
  -.1314353E-01  -.1357811E-01  -.1388490E-01  -.1408305E-01  -.1418256E-01
  -.1419870E-01  -.1415236E-01  -.1407394E-01  -.1398934E-01  -.1391274E-01
  -.1384616E-01  -.1378889E-01  -.1372802E-01  -.1365819E-01  -.1356787E-01
  -.1345317E-01  -.1331348E-01  -.1315833E-01  -.1299491E-01  -.1283636E-01
  -.1268302E-01  -.1254157E-01  -.1240762E-01  -.1227970E-01  -.1215205E-01
  -.1201819E-01  -.1187847E-01  -.1173286E-01  -.1158053E-01  -.1142821E-01
  -.1127587E-01  -.1112043E-01  -.1096038E-01  -.1076455E-01  -.1052669E-01
  -.1024318E-01  -.9926795E-02  -.9592119E-02  -.9250668E-02  -.8907081E-02
  -.8560644E-02  -.8207786E-02  -.7851787E-02  -.7489582E-02  -.7125687E-02
  -.6768180E-02  -.6418005E-02  -.6079568E-02  -.5752524E-02  -.5432781E-02
  -.5119189E-02  -.4812867E-02  -.4519031E-02  -.4241495E-02  -.3980731E-02
  -.3737549E-02  -.3505086E-02  -.3281792E-02  -.3059721E-02  -.2832650E-02
  -.2598385E-02  -.2357935E-02  -.2113541E-02  -.1873256E-02  -.1651285E-02
  -.1474668E-02  -.1367839E-02  -.1333959E-02  -.1367073E-02  -.1459731E-02
  -.1596491E-02  -.1760941E-02  -.1930060E-02  -.2093014E-02  -.2237134E-02
  -.2363217E-02  -.2474026E-02  -.2577027E-02  -.2681015E-02  -.2788657E-02
  -.2905835E-02  -.3027013E-02  -.3149129E-02  -.3270116E-02  -.3386666E-02
  -.3493845E-02  -.3594518E-02  -.3674153E-02  -.3718850E-02  -.3716049E-02
  -.3665960E-02  -.3574848E-02  -.3447378E-02  -.3266206E-02  -.3006968E-02
  -.2670616E-02  -.2270055E-02  -.1824550E-02  -.1356972E-02  -.8889760E-03
  -.4313414E-03   .9015641E-05   .4315074E-03   .8596653E-03   .1338811E-02
   .1902527E-02   .2559323E-02   .3276241E-02   .4009616E-02   .4719967E-02
   .5385728E-02   .6016739E-02   .6645738E-02   .7276461E-02   .7855759E-02
   .8320715E-02   .8628002E-02   .8771247E-02   .8765757E-02   .8651131E-02
   .8478064E-02   .8277958E-02   .8058943E-02   .7819091E-02   .7559736E-02
   .7276000E-02   .6966692E-02   .6604338E-02   .6172948E-02   .5673057E-02
   .5121944E-02   .4551837E-02   .4006064E-02   .3509298E-02   .3073973E-02
   .2687467E-02   .2338862E-02   .2004214E-02   .1669285E-02   .1317247E-02
   .9317126E-03   .5134677E-03   .6519343E-04  -.3954199E-03  -.8554697E-03
  -.1298845E-02  -.1717258E-02  -.2105197E-02  -.2453041E-02  -.2731838E-02
  -.2919851E-02  -.3009214E-02  -.3022434E-02  -.2986714E-02  -.2932682E-02
  -.2883432E-02  -.2844187E-02  -.2818378E-02  -.2798505E-02  -.2776925E-02
  -.2747238E-02  -.2705753E-02  -.2650340E-02  -.2586083E-02  -.2514006E-02
  -.2438363E-02  -.2359986E-02  -.2271903E-02  -.2164012E-02  -.2030995E-02
  -.1876357E-02  -.1690551E-02  -.1451419E-02  -.1126405E-02  -.7166367E-03
  -.2292258E-03   .3256590E-03   .9531556E-03   .1644353E-02   .2374179E-02
   .3107126E-02   .3804622E-02   .4436598E-02   .4981085E-02   .5433126E-02
   .5812231E-02   .6139788E-02   .6440458E-02   .6723538E-02   .7003295E-02
   .7281859E-02   .7564521E-02   .7850816E-02   .8150004E-02   .8463112E-02
   .8790197E-02   .9122870E-02   .9437031E-02   .9705273E-02   .9898916E-02
   .1000887E-01   .1004420E-01   .1002355E-01   .9954914E-02   .9841369E-02
   .9697536E-02   .9530948E-02   .9354759E-02   .9178948E-02   .9003696E-02
   .8837807E-02   .8686742E-02   .8565646E-02   .8479784E-02   .8423179E-02
   .8400549E-02   .8427151E-02   .8516401E-02   .8663277E-02   .8851675E-02
   .9054762E-02   .9248837E-02   .9416924E-02   .9554437E-02   .9647611E-02
   .9672158E-02   .9617451E-02   .9495190E-02   .9329115E-02   .9142583E-02
   .8967465E-02   .8818481E-02   .8704563E-02   .8618267E-02   .8540951E-02
   .8442823E-02   .8306796E-02   .8128562E-02   .7910182E-02   .7659738E-02
   .7387156E-02   .7101704E-02   .6811623E-02   .6524439E-02   .6246280E-02
   .5971289E-02   .5688215E-02   .5387066E-02   .5053475E-02   .4657756E-02
   .4191727E-02   .3655300E-02   .3073353E-02   .2477581E-02   .1906329E-02
   .1389202E-02   .9384243E-03   .5431427E-03   .1830980E-03  -.1708868E-03
  -.5415143E-03  -.9427931E-03  -.1377348E-02  -.1858339E-02  -.2432422E-02
  -.3132035E-02  -.3945139E-02  -.4824863E-02  -.5717747E-02  -.6575561E-02
  -.7364183E-02  -.8061242E-02  -.8658045E-02  -.9167281E-02  -.9604919E-02
  -.9983543E-02  -.1031557E-01  -.1061913E-01  -.1090791E-01  -.1119489E-01
  -.1148486E-01  -.1178062E-01  -.1207399E-01  -.1235902E-01  -.1262178E-01
  -.1285098E-01  -.1303737E-01  -.1318154E-01  -.1328734E-01  -.1336892E-01
  -.1342284E-01  -.1344606E-01  -.1343723E-01  -.1340168E-01  -.1334607E-01
  -.1327167E-01  -.1316646E-01  -.1302052E-01  -.1283455E-01  -.1261397E-01
  -.1237021E-01  -.1211797E-01  -.1186044E-01  -.1159611E-01  -.1131632E-01
  -.1101494E-01  -.1069389E-01  -.1035759E-01  -.1001318E-01  -.9669360E-02
  -.9333185E-02  -.9010331E-02  -.8702243E-02  -.8405641E-02  -.8116749E-02
  -.8032226E-02  -.7740484E-02  -.7450448E-02  -.7152219E-02  -.6854841E-02
  -.6555345E-02  -.6259179E-02  -.5965467E-02  -.5682638E-02  -.5413600E-02
  -.5166821E-02  -.4943941E-02  -.4740362E-02  -.4552323E-02  -.4372204E-02
  -.4195702E-02  -.4018743E-02  -.3840884E-02  -.3660960E-02  -.3483331E-02
  -.3312673E-02  -.3152416E-02  -.3006035E-02  -.2872553E-02  -.2749330E-02
  -.2633873E-02  -.2528602E-02  -.2443068E-02  -.2385318E-02  -.2354908E-02
  -.2345024E-02  -.2350411E-02  -.2358733E-02  -.2363886E-02  -.2365260E-02
  -.2360442E-02  -.2350825E-02  -.2319226E-02  -.2241731E-02  -.2107740E-02
  -.1922144E-02  -.1698596E-02  -.1460339E-02  -.1224175E-02  -.1000376E-02
  -.7977688E-03  -.6136411E-03  -.4446625E-03  -.2843277E-03  -.1282977E-03
   .2138928E-04   .1698239E-03   .3142483E-03   .4583458E-03   .6020272E-03
   .7459932E-03   .8847037E-03   .1009568E-02   .1106257E-02   .1166893E-02
   .1196524E-02   .1199958E-02   .1191800E-02   .1178655E-02   .1158731E-02
   .1118313E-02   .1053895E-02   .9613407E-03   .8500964E-03   .7263287E-03
   .5995441E-03   .4742714E-03   .3529452E-03   .2234702E-03   .8084338E-04
  -.7141223E-04  -.2354245E-03  -.4073064E-03  -.5794772E-03  -.7505521E-03
  -.9136492E-03  -.1068223E-02  -.1209542E-02  -.1338696E-02  -.1454821E-02
  -.1563336E-02  -.1668210E-02  -.1770219E-02  -.1872694E-02  -.1974264E-02
  -.2075031E-02  -.2175827E-02  -.2276747E-02  -.2377935E-02  -.2476504E-02
  -.2563820E-02  -.2623650E-02  -.2636056E-02  -.2598886E-02  -.2519855E-02
  -.2412581E-02  -.2294225E-02  -.2181080E-02  -.2079336E-02  -.1991441E-02
  -.1913718E-02  -.1838236E-02  -.1762550E-02  -.1680087E-02  -.1589222E-02
  -.1490959E-02  -.1386594E-02  -.1279585E-02  -.1168661E-02  -.1059392E-02
  -.9567464E-03  -.8649356E-03  -.7886241E-03  -.7275772E-03  -.6780976E-03
  -.6310966E-03  -.5730462E-03  -.4848897E-03  -.3694916E-03  -.2244555E-03
  -.6131765E-04   .1076997E-03   .2754261E-03   .4333138E-03   .5794562E-03
   .7156037E-03   .8445525E-03   .9717231E-03   .1096211E-02   .1224111E-02
   .1353250E-02   .1480597E-02   .1601011E-02   .1715754E-02   .1822388E-02
   .1921375E-02   .2016483E-02   .2099088E-02   .2158989E-02   .2186882E-02
   .2184582E-02   .2158806E-02   .2115705E-02   .2061781E-02   .1986548E-02
   .1884698E-02   .1752531E-02   .1596791E-02   .1430200E-02   .1266476E-02
   .1120138E-02   .1000429E-02   .9048176E-03   .8288959E-03   .7691108E-03
   .7332182E-03   .7371905E-03   .7876862E-03   .8771152E-03   .9948632E-03
   .1124155E-02   .1259347E-02   .1396319E-02   .1533799E-02   .1674960E-02
   .1817536E-02   .1955599E-02   .2077020E-02   .2170584E-02   .2229198E-02
   .2257718E-02   .2269142E-02   .2272971E-02   .2280175E-02   .2292460E-02
   .2309450E-02   .2327611E-02   .2343838E-02   .2356400E-02   .2362569E-02
   .2361994E-02   .2356634E-02   .2348767E-02   .2344848E-02   .2341154E-02
   .2343061E-02   .2347132E-02   .2353335E-02   .2360473E-02   .2370371E-02
   .2390426E-02   .2421319E-02   .2466691E-02   .2549090E-02   .2696018E-02
   .2920188E-02   .3218753E-02   .3588223E-02   .4041165E-02   .4564162E-02
   .5133511E-02   .5701275E-02   .6218991E-02   .6660089E-02   .7021114E-02
   .7323769E-02   .7607921E-02   .7906944E-02   .8245463E-02   .8630093E-02
   .9053659E-02   .9504447E-02   .9964831E-02   .1042099E-01   .1086227E-01
   .1126034E-01   .1158902E-01   .1183658E-01   .1201120E-01   .1212892E-01
   .1221239E-01   .1227106E-01   .1231774E-01   .1235900E-01   .1239893E-01
   .1244049E-01   .1247491E-01   .1249339E-01   .1248772E-01   .1245375E-01
   .1238809E-01   .1227328E-01   .1207883E-01   .1178219E-01   .1138379E-01
   .1090714E-01   .1038661E-01   .9849821E-02   .9322774E-02   .8816731E-02
   .8340585E-02   .7889431E-02   .7455835E-02   .7023407E-02   .6577909E-02
   .6111212E-02   .5620804E-02   .5112642E-02   .4590636E-02   .4065127E-02
   .3541536E-02   .3019796E-02   .2493249E-02   .1954696E-02   .1408350E-02
   .8731707E-03   .3781172E-03  -.5195219E-04  -.4123424E-03  -.7088421E-03
  -.9550053E-03  -.1163618E-02  -.1339919E-02  -.1470728E-02  -.1546040E-02
  -.1556538E-02  -.1501871E-02  -.1389564E-02  -.1238215E-02  -.1066172E-02
  -.8823660E-03  -.6880898E-03  -.4848529E-03  -.2712131E-03  -.5452193E-04
   .1595395E-03   .3480602E-03   .4925478E-03   .5865321E-03   .6364103E-03
   .6572568E-03   .6649354E-03   .6655563E-03   .6462897E-03   .5888246E-03
   .4881674E-03   .3550247E-03   .2038220E-03   .5160900E-04  -.9432358E-04
  -.2260739E-03  -.3467817E-03  -.4584233E-03  -.5665120E-03  -.6843577E-03
  -.8218207E-03  -.9892700E-03  -.1191068E-02  -.1457154E-02  -.1815664E-02
  -.2246199E-02  -.2698603E-02  -.3126027E-02  -.3493168E-02  -.3786214E-02
  -.4009201E-02  -.4175701E-02  -.4305444E-02  -.4405858E-02  -.4464928E-02
  -.4462503E-02  -.4384718E-02  -.4224770E-02  -.3992532E-02  -.3709744E-02
  -.3395334E-02  -.3055956E-02  -.2685007E-02  -.2304145E-02  -.1960582E-02
  -.1684847E-02  -.1491954E-02  -.1369147E-02  -.1292611E-02  -.1241188E-02
  -.1192275E-02  -.1133208E-02  -.1057912E-02  -.9670471E-03  -.8695035E-03
  -.7730895E-03  -.6878503E-03  -.6172359E-03  -.5627320E-03  -.5230835E-03
  -.4937243E-03  -.4699058E-03  -.4491662E-03  -.4282741E-03  -.4038437E-03
  -.3753093E-03  -.3444167E-03  -.3097111E-03  -.2707733E-03  -.2117039E-03
  -.1136568E-03   .2835739E-04   .2078754E-03   .4097383E-03   .6139882E-03
   .8070230E-03   .9775330E-03   .1121193E-02   .1237925E-02   .1336083E-02
   .1413437E-02   .1465552E-02   .1490093E-02   .1488850E-02   .1465943E-02
   .1418007E-02   .1343202E-02   .1241730E-02   .1120581E-02   .9890259E-03
   .8528679E-03   .7170647E-03   .5861733E-03   .4595731E-03   .3370767E-03
   .2175216E-03   .9783798E-04  -.2110572E-04  -.1422682E-03  -.2635412E-03
  -.3828998E-03  -.5002075E-03  -.6126075E-03  -.7173177E-03  -.8069932E-03
  -.8775012E-03  -.9253874E-03  -.9566445E-03  -.9763412E-03  -.9992689E-03
  -.1039065E-02  -.1101058E-02  -.1184429E-02  -.1283917E-02  -.1390015E-02
  -.1498768E-02  -.1603673E-02  -.1704416E-02  -.1798268E-02  -.1886231E-02
  -.1967765E-02  -.2048829E-02  -.2128153E-02  -.2206725E-02  -.2282443E-02
  -.2351345E-02  -.2412025E-02  -.2469268E-02  -.2532688E-02  -.2612582E-02
  -.2712247E-02  -.2822009E-02  -.2925902E-02  -.3009180E-02  -.3061506E-02
  -.3071804E-02  -.3040743E-02  -.2976538E-02  -.2894297E-02  -.2805759E-02
  -.2722637E-02  -.2651003E-02  -.2591235E-02  -.2542623E-02  -.2499799E-02
  -.2457562E-02  -.2412759E-02  -.2360382E-02  -.2301023E-02  -.2234424E-02
  -.2161569E-02  -.2082915E-02  -.1996954E-02  -.1904377E-02  -.1806749E-02
  -.1707057E-02  -.1608706E-02  -.1513800E-02  -.1423779E-02  -.1333261E-02
  -.1236773E-02  -.1131876E-02  -.1017474E-02  -.8952613E-03  -.7625333E-03
  -.6200821E-03  -.4715513E-03  -.3204327E-03  -.1707069E-03  -.2718291E-04
   .1072029E-03   .2277912E-03   .3333313E-03   .4239976E-03   .5022025E-03
   .5701464E-03   .6274488E-03   .6755240E-03   .7156402E-03   .7524358E-03
   .7847428E-03   .8131582E-03   .8365901E-03   .8543177E-03   .8670215E-03
   .8761893E-03   .8813476E-03   .8854418E-03   .8882758E-03   .8909523E-03
   .8949355E-03   .8992603E-03   .9035490E-03   .9069289E-03   .9069676E-03
   .9033587E-03   .8961568E-03   .8922215E-03   .8979273E-03   .9174304E-03
   .9500037E-03   .9919495E-03   .1038058E-02   .1085361E-02   .1132633E-02
   .1179244E-02   .1225241E-02   .1270129E-02   .1310374E-02   .1341928E-02
   .1361794E-02   .1370267E-02   .1370126E-02   .1364246E-02   .1357028E-02
   .1350538E-02   .1345466E-02   .1340716E-02   .1335640E-02   .1328927E-02
   .1319357E-02   .1307575E-02   .1292507E-02   .1273843E-02   .1251127E-02
   .1221203E-02   .1182923E-02   .1136911E-02   .1085385E-02   .1031333E-02
   .9775192E-03   .9252539E-03   .8745292E-03   .8257039E-03   .7777174E-03
   .7309296E-03   .6836804E-03   .6367056E-03   .5896589E-03   .5425030E-03
   .4957261E-03   .4510451E-03   .4093299E-03   .3711189E-03   .3364001E-03
   .3038341E-03   .2725307E-03   .2423649E-03   .2116663E-03   .1809465E-03
   .1493226E-03   .1168182E-03   .8453873E-04   .5279185E-04   .2144028E-04
  -.8702784E-05  -.3734854E-04  -.6566684E-04  -.9217083E-04  -.1186930E-03
  -.1462987E-03  -.1786060E-03  -.2173098E-03  -.2618894E-03  -.3106073E-03
  -.3617322E-03  -.4122707E-03  -.4627528E-03  -.5128479E-03  -.5633284E-03
  -.6137614E-03  -.6633891E-03  -.7124754E-03  -.7631068E-03  -.8223115E-03
  -.8967523E-03  -.9877722E-03  -.1092103E-02  -.1202193E-02  -.1308485E-02
  -.1402676E-02  -.1480941E-02  -.1542562E-02  -.1591170E-02  -.1630822E-02
  -.1664415E-02  -.1695476E-02  -.1724745E-02  -.1754942E-02  -.1787547E-02
  -.1825238E-02  -.1866915E-02  -.1911437E-02  -.1956801E-02  -.2004158E-02
  -.2056491E-02  -.2113887E-02  -.2176118E-02  -.2241991E-02  -.2310366E-02
  -.2379003E-02  -.2439261E-02  -.2478729E-02  -.2488273E-02  -.2466605E-02
  -.2419868E-02  -.2357389E-02  -.2288940E-02  -.2218974E-02  -.2148055E-02
  -.2075947E-02  -.2002758E-02  -.1928252E-02  -.1852408E-02  -.1771268E-02
  -.1679031E-02  -.1573573E-02  -.1456124E-02  -.1328769E-02  -.1179897E-02
  -.9975831E-03  -.7966619E-03  -.6022624E-03  -.4365690E-03  -.3120722E-03
  -.2330779E-03  -.1942968E-03  -.1828046E-03  -.1841247E-03  -.1852780E-03
  -.1772279E-03  -.1564192E-03  -.1233843E-03  -.8377388E-04  -.4471780E-04
  -.1178004E-04   .1237436E-04   .2777430E-04   .3678305E-04   .4168211E-04
   .4469711E-04   .4754909E-04   .5292872E-04   .6457304E-04   .8522079E-04
   .1157749E-03   .1536047E-03   .1963708E-03   .2422456E-03   .2903005E-03
   .3394042E-03   .3875636E-03   .4333600E-03   .4759236E-03   .5175286E-03
   .5616261E-03   .6082012E-03   .6529948E-03   .6913055E-03   .7199290E-03
   .7373706E-03   .7431262E-03   .7388338E-03   .7272902E-03   .7117943E-03
   .6962242E-03   .6840216E-03   .6769072E-03   .6748031E-03   .6762168E-03
   .6791635E-03   .6830536E-03   .6871947E-03   .6907052E-03   .6922945E-03
   .6902613E-03   .6831300E-03   .6707288E-03   .6537147E-03   .6334195E-03
   .6114917E-03   .5888978E-03   .5663344E-03   .5437066E-03   .5209552E-03
   .4978821E-03   .4741734E-03   .4489954E-03   .4206462E-03   .3881645E-03
   .3510151E-03   .3103620E-03   .2676926E-03   .2245002E-03   .1823741E-03
   .1419283E-03   .1039414E-03   .6797125E-04   .3371337E-04   .6009501E-06
  -.3218840E-04  -.6556879E-04  -.1003972E-03  -.1367995E-03  -.1742703E-03
  -.2120126E-03  -.2492859E-03  -.2861224E-03  -.3232242E-03  -.3606941E-03
  -.3980317E-03  -.4353322E-03  -.4731509E-03  -.5115981E-03  -.5503820E-03
  -.5885201E-03  -.6250596E-03  -.6594138E-03  -.6913856E-03  -.7210332E-03
  -.7484631E-03  -.7734699E-03  -.7956298E-03  -.8142477E-03  -.8289923E-03
  -.8397479E-03  -.8472088E-03  -.8519214E-03  -.8546744E-03  -.8558344E-03
  -.8557963E-03  -.8544974E-03  -.8517995E-03  -.8476723E-03  -.8419158E-03
  -.8345810E-03  -.8256999E-03  -.8154415E-03  -.8039328E-03  -.7914452E-03
  -.7780300E-03  -.7637185E-03  -.7483218E-03  -.7313257E-03  -.7126938E-03
  -.6924674E-03  -.6711188E-03  -.6491692E-03  -.6268991E-03  -.6046544E-03
  -.5824786E-03  -.5604351E-03  -.5385317E-03  -.5167257E-03  -.4949697E-03
  -.4732314E-03  -.4514922E-03  -.4297333E-03  -.4080254E-03  -.3864168E-03
  -.3650072E-03  -.3438199E-03  -.3227775E-03  -.3017071E-03  -.2806143E-03
  -.2594907E-03  -.2384073E-03  -.2175216E-03  -.1969966E-03  -.1770466E-03
  -.1577646E-03  -.1392680E-03  -.1215435E-03  -.1045790E-03  -.8831435E-04
  -.7264527E-04  -.5756466E-04  -.4309709E-04  -.2921792E-04  -.1591011E-04
  -.3120280E-05   .9248131E-05   .2120775E-04   .3271806E-04   .4362325E-04
   .5380793E-04   .6334131E-04   .7239586E-04   .8115524E-04   .8981551E-04
   .9855361E-04   .1075095E-03   .1167363E-03   .1261509E-03   .1355839E-03
   .1448590E-03   .1538290E-03   .1624244E-03   .1706236E-03   .1784056E-03
   .1857503E-03   .1926411E-03   .1990704E-03   .2050370E-03   .2105552E-03
   .2156160E-03   .2202001E-03   .2242924E-03   .2278784E-03   .2309590E-03
   .2335430E-03   .2356497E-03   .2373017E-03   .2385218E-03   .2393313E-03
   .2397475E-03   .2397863E-03   .2394622E-03   .2387900E-03   .2377850E-03
