# Supplementary material for: Earthquake Response Analysis of Tall Reinforced Concrete Chimneys considering Eccentricity
Source: Hindawi journal article supplement (doi:10.1155/2020/1417969), 2020-03-11
Supplement: f1 [file 1417969.f1.zip › 1417969.f1/Four kinds of earthquake records/Stiff soil/CHICHI CHY028-N.txt]

PEER STRONG MOTION DATABASE RECORD. PROCESSING BY PACIFIC ENGINEERING.
CHI-CHI 09/20/99, CHY028, N (CWB)
ACCELERATION TIME HISTORY IN UNITS OF G. FILTER POINTS: HP=0.1 Hz LP=50.0 Hz
NPTS= 18000, DT= .00500 SEC
   .7273025E-06   .6521952E-06   .5579381E-06   .5352478E-06   .5881115E-06
   .6366392E-06   .6743408E-06   .7057564E-06   .7588258E-06   .8245849E-06
   .9057112E-06   .9754294E-06   .1081703E-05   .1174006E-05   .1263051E-05
   .1371188E-05   .1514367E-05   .1575706E-05   .1692226E-05   .1879644E-05
   .2065782E-05   .2118276E-05   .2208838E-05   .2396956E-05   .2612898E-05
   .2763298E-05   .3005551E-05   .3272179E-05   .3410601E-05   .3477421E-05
   .3781318E-05   .4098079E-05   .4196328E-05   .4347315E-05   .4712623E-05
   .5041377E-05   .5403426E-05   .5682587E-05   .5876184E-05   .6101447E-05
   .6314603E-05   .6318211E-05   .6512043E-05   .6772930E-05   .6622290E-05
   .6752967E-05   .7681847E-05   .8405517E-05   .8349786E-05   .8020684E-05
   .8614057E-05   .9337698E-05   .9665064E-05   .9962278E-05   .1018365E-04
   .1012609E-04   .1063582E-04   .1183269E-04   .1266216E-04   .1218687E-04
   .1158981E-04   .1208052E-04   .1323373E-04   .1368742E-04   .1385564E-04
   .1352585E-04   .1398093E-04   .1594079E-04   .1663336E-04   .1596457E-04
   .1584642E-04   .1667380E-04   .1736753E-04   .1685847E-04   .1681180E-04
   .1772090E-04   .1888053E-04   .1919172E-04   .1952340E-04   .1963483E-04
   .1999399E-04   .2053941E-04   .2068019E-04   .2132805E-04   .2294218E-04
   .2390669E-04   .2376201E-04   .2392512E-04   .2409430E-04   .2321551E-04
   .2253625E-04   .2372812E-04   .2512478E-04   .2592831E-04   .2663357E-04
   .2672347E-04   .2561563E-04   .2574540E-04   .2755894E-04   .2853058E-04
   .2898841E-04   .3039901E-04   .3207312E-04   .3059409E-04   .2925738E-04
   .2870922E-04   .2961774E-04   .3327078E-04   .3474731E-04   .3431997E-04
   .3352780E-04   .3428418E-04   .3652347E-04   .3709835E-04   .3639233E-04
   .3673928E-04   .3890633E-04   .3994618E-04   .3807764E-04   .3703022E-04
   .3653980E-04   .3384285E-04   .3320243E-04   .3946684E-04   .4425556E-04
   .4123264E-04   .3942871E-04   .4218517E-04   .4394140E-04   .4319551E-04
   .4452385E-04   .4610513E-04   .4597459E-04   .4607719E-04   .4891637E-04
   .5102679E-04   .4637476E-04   .4331620E-04   .4836835E-04   .5319532E-04
   .5182493E-04   .4924753E-04   .5006028E-04   .5408725E-04   .5677987E-04
   .5255439E-04   .4766209E-04   .4809788E-04   .5346712E-04   .5846313E-04
   .5662673E-04   .5505412E-04   .5594161E-04   .5643795E-04   .5574799E-04
   .5439868E-04   .5551737E-04   .5796273E-04   .5892263E-04   .5951721E-04
   .6217957E-04   .6486684E-04   .6543535E-04   .6601178E-04   .6761965E-04
   .6529571E-04   .6165069E-04   .6140965E-04   .6300658E-04   .6392085E-04
   .6326188E-04   .6154831E-04   .6261962E-04   .6686034E-04   .7373298E-04
   .7754309E-04   .7341622E-04   .6504323E-04   .6532630E-04   .7363900E-04
   .7543326E-04   .7211141E-04   .7158446E-04   .7572368E-04   .7607008E-04
   .7386780E-04   .7294841E-04   .7535445E-04   .7844196E-04   .7916822E-04
   .7897854E-04   .7829164E-04   .7647528E-04   .7763613E-04   .8083891E-04
   .8206157E-04   .8103059E-04   .7543032E-04   .6869335E-04   .7428321E-04
   .8468454E-04   .8400195E-04   .7305654E-04   .7497327E-04   .8342965E-04
   .8062749E-04   .7335800E-04   .7096982E-04   .7527739E-04   .7349642E-04
   .7670409E-04   .8486128E-04   .8599583E-04   .7905952E-04   .8339131E-04
   .9002065E-04   .9008558E-04   .8457095E-04   .7877739E-04   .7907677E-04
   .8180505E-04   .8858178E-04   .9508169E-04   .9491402E-04   .8900288E-04
   .8517558E-04   .8605379E-04   .8661150E-04   .8069222E-04   .7438485E-04
   .7915879E-04   .8632130E-04   .9302958E-04   .8955395E-04   .7758946E-04
   .8988294E-04   .1075871E-03   .1008802E-03   .9688051E-04   .9973373E-04
   .8969195E-04   .7607610E-04   .8330093E-04   .9541800E-04   .8314734E-04
   .7591047E-04   .9233921E-04   .1024817E-03   .9867891E-04   .9936714E-04
   .1056331E-03   .1064772E-03   .9927348E-04   .9522919E-04   .1035107E-03
   .1132961E-03   .1049506E-03   .8734431E-04   .8236288E-04   .9388356E-04
   .1059770E-03   .1057560E-03   .1031063E-03   .1023345E-03   .1061911E-03
   .1090191E-03   .1035545E-03   .9561442E-04   .9059098E-04   .9407300E-04
   .9980490E-04   .1011783E-03   .9777217E-04   .9447473E-04   .9965424E-04
   .9930074E-04   .9494278E-04   .9225661E-04   .9472833E-04   .9120862E-04
   .8326674E-04   .8993732E-04   .1087508E-03   .1275963E-03   .1162916E-03
   .8282562E-04   .6892761E-04   .7974673E-04   .8585248E-04   .8811209E-04
   .9775849E-04   .1082634E-03   .1119936E-03   .1004482E-03   .8767669E-04
   .9261153E-04   .1202637E-03   .1339888E-03   .1111777E-03   .9579014E-04
   .1082385E-03   .1125060E-03   .9905001E-04   .9541110E-04   .1043567E-03
   .1059076E-03   .1020591E-03   .1143994E-03   .1186129E-03   .1100624E-03
   .1102159E-03   .1130937E-03   .1176492E-03   .1171694E-03   .1031257E-03
   .9437449E-04   .9233408E-04   .8754011E-04   .7694632E-04   .7674633E-04
   .1049733E-03   .1217839E-03   .1016839E-03   .9965901E-04   .1165926E-03
   .1070905E-03   .9366155E-04   .1155423E-03   .1278769E-03   .9622297E-04
   .7622446E-04   .9144927E-04   .1000049E-03   .9288983E-04   .9689383E-04
   .9906104E-04   .8226069E-04   .9270130E-04   .1055114E-03   .8345192E-04
   .8322143E-04   .1188047E-03   .1450922E-03   .1346086E-03   .1068305E-03
   .8630093E-04   .8872055E-04   .1014089E-03   .8815829E-04   .9538492E-04
   .1182534E-03   .1099042E-03   .9599000E-04   .9985036E-04   .1099225E-03
   .1178601E-03   .1097506E-03   .9282462E-04   .8983554E-04   .9345098E-04
   .9021670E-04   .6532399E-04   .5282491E-04   .7773357E-04   .1085332E-03
   .9375215E-04   .7815928E-04   .9820149E-04   .1070683E-03   .9367945E-04
   .7635240E-04   .8806283E-04   .1199656E-03   .1327102E-03   .1392285E-03
   .1758194E-03   .1825823E-03   .1316856E-03   .1019076E-03   .1147838E-03
   .1253976E-03   .1088559E-03   .1007068E-03   .1121078E-03   .9743711E-04
   .9070206E-04   .1069841E-03   .1266929E-03   .1100735E-03   .6812415E-04
   .7553438E-04   .1170785E-03   .1178866E-03   .1107933E-03   .1023747E-03
   .8252940E-04   .8327916E-04   .1053104E-03   .1005540E-03   .6657392E-04
   .6299355E-04   .6749992E-04   .4857685E-04   .6688347E-04   .1159294E-03
   .9856536E-04   .4028656E-04   .4403288E-04   .7894373E-04   .9318674E-04
   .9087078E-04   .8821499E-04   .8614815E-04   .6848007E-04   .5004983E-04
   .5832072E-04   .6681444E-04   .9423193E-04   .1275557E-03   .1183995E-03
   .1024997E-03   .9972095E-04   .9011860E-04   .1098055E-03   .1298082E-03
   .9613736E-04   .6585257E-04   .7353248E-04   .8708683E-04   .8131001E-04
   .7228741E-04   .1012034E-03   .1162687E-03   .7385547E-04   .2488705E-04
   .4122111E-04   .9778948E-04   .1058835E-03   .9449970E-04   .7572034E-04
   .6183229E-04   .5658318E-04   .7366603E-04   .1003838E-03   .5903228E-04
   .1365779E-05   .2193864E-04   .7286366E-04   .1002323E-03   .5703537E-04
   .1716704E-04   .4604689E-04   .6430770E-04   .7692380E-04   .9472424E-04
   .8664962E-04   .7230895E-04   .8430446E-04   .9834375E-04   .8257746E-04
   .6737555E-04   .7730865E-04   .8425627E-04   .7941718E-04   .4806870E-04
   .1415327E-04   .4567814E-04   .1182396E-03   .1040154E-03   .3060234E-04
   .3377799E-04   .7214599E-04   .6986503E-04   .2492670E-04  -.4720952E-05
   .5055894E-04   .9587228E-04   .1010485E-03   .1137338E-03   .9160777E-04
   .5362128E-04   .2755527E-04   .7397570E-05   .4331807E-04   .6272155E-04
   .5220583E-04   .6511940E-04   .7279613E-04   .2015252E-04  -.1736783E-04
   .3446547E-04   .9060337E-04   .6339962E-04   .6946016E-05   .1888794E-04
   .4710520E-04   .6461223E-04   .7346694E-04   .4282650E-04  -.2322870E-04
  -.2765063E-04   .1101873E-04   .3599903E-05   .1894854E-04   .4471948E-04
   .3150283E-04   .1634971E-04   .9595502E-05   .1869222E-05   .8679639E-05
   .4298477E-04   .5556277E-04   .3911405E-04   .2338103E-04   .6653841E-05
  -.5704033E-05  -.1271456E-04  -.2036877E-04   .1412436E-04   .7907408E-04
   .9614997E-04   .5943885E-04   .1638641E-04   .2499366E-04   .4117206E-04
   .3272779E-04   .9518911E-05  -.1505053E-04   .1177570E-04   .2964564E-04
  -.1034509E-04  -.6464816E-05   .6251928E-04   .8526066E-04   .3240836E-04
  -.2230406E-04  -.3446627E-04  -.1680538E-04  -.4840292E-05  -.1733539E-04
  -.1769983E-05   .8206681E-05   .1035127E-04   .3006316E-04   .2419000E-04
  -.3958829E-05   .1339251E-04   .4156965E-04  -.6724861E-06  -.5689694E-04
  -.4875544E-04  -.2071635E-04   .3292700E-04   .6585402E-04   .4881722E-04
  -.1057215E-05  -.4559586E-04  -.1004379E-04   .4138802E-04   .3437085E-04
   .8551201E-05  -.1766641E-04  -.2729029E-04  -.2395947E-04   .9230357E-05
   .2310595E-04  -.3090802E-04  -.5020375E-04  -.2268352E-04  -.3102003E-04
  -.8317887E-04  -.8500542E-04  -.1703809E-04  -.2547063E-04  -.1719827E-04
   .6495428E-04   .6379618E-04  -.4283141E-04  -.6355299E-04   .2523535E-04
   .6584369E-04   .2560346E-04  -.8314720E-05   .1433074E-04   .1917444E-04
   .7416611E-05  -.1466106E-05  -.2943779E-04  -.1954924E-04   .3639593E-06
  -.1136651E-04   .1620355E-04   .1601509E-04  -.2850993E-04  -.4404170E-04
  -.4618690E-05   .3404902E-04   .1054946E-05  -.4734483E-04  -.6149825E-04
  -.6440199E-04  -.7679543E-04  -.1172114E-03  -.9355736E-04  -.2008577E-04
  -.1605860E-04  -.6366256E-04  -.5386154E-04  -.4911615E-04  -.1131112E-03
  -.1080647E-03  -.3019716E-04  -.1236546E-04  -.4227883E-04  -.4710411E-04
  -.6825944E-04  -.8925737E-04  -.5642276E-04  -.2657746E-04  -.1834560E-04
  -.1980461E-04  -.5027852E-04  -.7811259E-04  -.3050767E-04  -.9297125E-05
  -.8679024E-04  -.1122704E-03  -.5128109E-04  -.3162317E-04  -.4989263E-04
  -.3572840E-04  -.7109268E-04  -.1392622E-03  -.1317276E-03  -.1010252E-03
  -.1166902E-03  -.1399265E-03  -.8987243E-04  -.5497794E-04  -.8137545E-04
  -.8565078E-04  -.8827324E-04  -.8451893E-04  -.5612043E-04  -.6948943E-04
  -.1325003E-03  -.1250739E-03  -.5815410E-04  -.4625863E-04  -.9599693E-04
  -.1566944E-03  -.1645774E-03  -.1240322E-03  -.6800649E-04  -.6068684E-04
  -.7973632E-04  -.6598798E-04  -.2952214E-04  -.2794060E-04  -.1093545E-03
  -.1468467E-03  -.1074734E-03  -.8211364E-04  -.9088655E-04  -.1112354E-03
  -.1147141E-03  -.6672665E-04  -.5515131E-04  -.1165920E-03  -.2054577E-03
  -.1938599E-03  -.1016320E-03  -.8870203E-04  -.1198473E-03  -.1278320E-03
  -.1307751E-03  -.1330808E-03  -.1151988E-03  -.4507410E-04  -.2874204E-04
  -.5060165E-04  -.1025730E-03  -.1740695E-03  -.1733525E-03  -.1652026E-03
  -.2002856E-03  -.1485130E-03  -.7271362E-04  -.1172728E-03  -.2038118E-03
  -.1655802E-03  -.5695453E-04  -.6251273E-04  -.1522746E-03  -.1525639E-03
  -.7671328E-04  -.1069194E-03  -.2120667E-03  -.2124132E-03  -.1260676E-03
  -.1042566E-03  -.1172318E-03  -.1054134E-03  -.8521820E-04  -.1580267E-03
  -.2525831E-03  -.2508755E-03  -.1674072E-03  -.1136443E-03  -.1233633E-03
  -.1479572E-03  -.1847002E-03  -.2085101E-03  -.1534182E-03  -.1083185E-03
  -.1241314E-03  -.1552615E-03  -.1750791E-03  -.1632416E-03  -.1247156E-03
  -.7849906E-04  -.8993227E-04  -.1108396E-03  -.1080971E-03  -.1247192E-03
  -.1509039E-03  -.1646507E-03  -.1812497E-03  -.1649533E-03  -.1376914E-03
  -.1901682E-03  -.2162800E-03  -.1281127E-03  -.1099408E-03  -.2025844E-03
  -.2317563E-03  -.1855508E-03  -.1397642E-03  -.1674703E-03  -.2143371E-03
  -.1916129E-03  -.1785185E-03  -.2242777E-03  -.1764719E-03  -.1252873E-03
  -.1798546E-03  -.2135918E-03  -.1390055E-03  -.9904020E-04  -.1179314E-03
  -.1228495E-03  -.1287006E-03  -.1707519E-03  -.1559402E-03  -.9549971E-04
  -.1165295E-03  -.1789672E-03  -.1948599E-03  -.1776423E-03  -.1717955E-03
  -.1778813E-03  -.1900845E-03  -.2183825E-03  -.2511226E-03  -.2667985E-03
  -.2245615E-03  -.1664484E-03  -.1387915E-03  -.1607748E-03  -.1810465E-03
  -.1697352E-03  -.1914112E-03  -.2013515E-03  -.1582092E-03  -.1043215E-03
  -.6873510E-04  -.1417114E-03  -.2708418E-03  -.3107478E-03  -.2717052E-03
  -.1905846E-03  -.1688227E-03  -.2105801E-03  -.1921574E-03  -.1440362E-03
  -.1619416E-03  -.1955061E-03  -.1811209E-03  -.1667177E-03  -.1656575E-03
  -.1923717E-03  -.2374829E-03  -.2259497E-03  -.1815301E-03  -.1944037E-03
  -.1839759E-03  -.1224826E-03  -.1200642E-03  -.1870381E-03  -.2211507E-03
  -.1874318E-03  -.2059080E-03  -.2958391E-03  -.2603313E-03  -.1595038E-03
  -.1708012E-03  -.2586461E-03  -.2988593E-03  -.2732899E-03  -.2358638E-03
  -.2399865E-03  -.2311933E-03  -.1898195E-03  -.1783631E-03  -.1860863E-03
  -.2041974E-03  -.2230721E-03  -.2180737E-03  -.1907338E-03  -.2040443E-03
  -.2562117E-03  -.2504774E-03  -.1948266E-03  -.2036288E-03  -.3294696E-03
  -.4403615E-03  -.3243337E-03  -.1973394E-03  -.2479360E-03  -.2887806E-03
  -.2347414E-03  -.1687461E-03  -.1618556E-03  -.2088666E-03  -.2394633E-03
  -.2533179E-03  -.2900949E-03  -.2960820E-03  -.2963475E-03  -.2676017E-03
  -.2381321E-03  -.2517588E-03  -.2664394E-03  -.2581381E-03  -.2438027E-03
  -.2929335E-03  -.2572369E-03  -.1512666E-03  -.1620514E-03  -.2210881E-03
  -.1951829E-03  -.1864659E-03  -.2206324E-03  -.2359402E-03  -.3071050E-03
  -.3740781E-03  -.3069154E-03  -.2658302E-03  -.2459339E-03  -.2183573E-03
  -.3107567E-03  -.3396013E-03  -.2644085E-03  -.2604171E-03  -.3210085E-03
  -.3019149E-03  -.2356295E-03  -.2365275E-03  -.3120926E-03  -.3323080E-03
  -.2520317E-03  -.1485348E-03  -.1641926E-03  -.2690912E-03  -.2581445E-03
  -.2394819E-03  -.2790939E-03  -.2822716E-03  -.2286930E-03  -.1772174E-03
  -.2151609E-03  -.2438947E-03  -.2374004E-03  -.2393085E-03  -.2489060E-03
  -.2510944E-03  -.2490226E-03  -.2472638E-03  -.2582078E-03  -.2739611E-03
  -.2446049E-03  -.2159760E-03  -.2106800E-03  -.2327706E-03  -.2552354E-03
  -.2668276E-03  -.2766829E-03  -.2370909E-03  -.1952406E-03  -.2289642E-03
  -.3019855E-03  -.3332551E-03  -.3043058E-03  -.2362865E-03  -.2295539E-03
  -.2747049E-03  -.2608712E-03  -.2235217E-03  -.2283978E-03  -.3098935E-03
  -.3298988E-03  -.2247969E-03  -.1878392E-03  -.2526147E-03  -.3201999E-03
  -.3053979E-03  -.2208317E-03  -.2267372E-03  -.2778557E-03  -.2774258E-03
  -.2467196E-03  -.2177000E-03  -.2423359E-03  -.2846421E-03  -.2698997E-03
  -.2559035E-03  -.2432601E-03  -.2229303E-03  -.1924248E-03  -.1958902E-03
  -.1894422E-03  -.1895683E-03  -.2450435E-03  -.2883877E-03  -.2248715E-03
  -.1586004E-03  -.1596221E-03  -.2359695E-03  -.2924510E-03  -.2450392E-03
  -.2478848E-03  -.3108557E-03  -.2893142E-03  -.2046714E-03  -.2456882E-03
  -.3452713E-03  -.2953910E-03  -.1914656E-03  -.1626281E-03  -.1805555E-03
  -.2183202E-03  -.2626081E-03  -.3438955E-03  -.3401027E-03  -.2744716E-03
  -.2799183E-03  -.3076986E-03  -.2543276E-03  -.1954816E-03  -.2227736E-03
  -.2599077E-03  -.2413655E-03  -.2146060E-03  -.1979530E-03  -.2485131E-03
  -.2789985E-03  -.2568558E-03  -.2891692E-03  -.3135104E-03  -.2928677E-03
  -.2214123E-03  -.1612030E-03  -.1920305E-03  -.2258851E-03  -.1923461E-03
  -.1149290E-03  -.1310471E-03  -.2870980E-03  -.3500538E-03  -.2258968E-03
  -.1411513E-03  -.1741366E-03  -.2132387E-03  -.2050327E-03  -.2073990E-03
  -.2646050E-03  -.2903384E-03  -.2635596E-03  -.2450763E-03  -.2504599E-03
  -.2495228E-03  -.2138272E-03  -.1943171E-03  -.2085430E-03  -.1966357E-03
  -.2000361E-03  -.2257234E-03  -.2702397E-03  -.2790082E-03  -.2551367E-03
  -.2319154E-03  -.2471928E-03  -.3551756E-03  -.3354122E-03  -.2054255E-03
  -.2256923E-03  -.2909081E-03  -.2700371E-03  -.2239876E-03  -.1816005E-03
  -.1541898E-03  -.1843236E-03  -.2233311E-03  -.2697632E-03  -.2964835E-03
  -.2762783E-03  -.2471314E-03  -.1802307E-03  -.1542322E-03  -.1881235E-03
  -.1859367E-03  -.1853905E-03  -.1903620E-03  -.1863988E-03  -.2275379E-03
  -.2940349E-03  -.2443310E-03  -.1314210E-03  -.1441863E-03  -.2833389E-03
  -.3378316E-03  -.2627907E-03  -.2044186E-03  -.2057174E-03  -.1922939E-03
  -.1798795E-03  -.2282596E-03  -.2546445E-03  -.2406664E-03  -.2444503E-03
  -.2431296E-03  -.2138554E-03  -.1730599E-03  -.1477044E-03  -.1783192E-03
  -.2464021E-03  -.2122903E-03  -.1596034E-03  -.1568884E-03  -.1422444E-03
  -.9830010E-04  -.1384033E-03  -.2182238E-03  -.2347057E-03  -.2196786E-03
  -.2502399E-03  -.3079731E-03  -.2866488E-03  -.2009833E-03  -.1934062E-03
  -.2142154E-03  -.1839795E-03  -.1556698E-03  -.1133573E-03  -.1006050E-03
  -.1820726E-03  -.2311134E-03  -.1648650E-03  -.1049701E-03  -.1685807E-03
  -.2510192E-03  -.2701425E-03  -.2128428E-03  -.1817773E-03  -.1883251E-03
  -.2468284E-03  -.2625808E-03  -.1782382E-03  -.9610869E-04  -.9192128E-04
  -.1766196E-03  -.2150739E-03  -.1624932E-03  -.1536009E-03  -.1913097E-03
  -.1453713E-03  -.1048641E-03  -.1896159E-03  -.2728189E-03  -.2105186E-03
  -.1361138E-03  -.1684334E-03  -.2460570E-03  -.2409548E-03  -.1905106E-03
  -.1422090E-03  -.1399606E-03  -.1490274E-03  -.9085027E-04  -.6414615E-04
  -.1728507E-03  -.2361051E-03  -.2456422E-03  -.2943476E-03  -.2630150E-03
  -.1776627E-03  -.1202173E-03  -.1067193E-03  -.8966276E-04  -.9818591E-04
  -.1180676E-03  -.1268431E-03  -.1103895E-03  -.8243646E-04  -.1215267E-03
  -.2549000E-03  -.2657258E-03  -.1898629E-03  -.1651969E-03  -.1601037E-03
  -.1337826E-03  -.9073269E-04  -.6617357E-04  -.9318880E-04  -.1979676E-03
  -.2562335E-03  -.2062863E-03  -.1665331E-03  -.1443944E-03  -.1692649E-03
  -.1600876E-03  -.8809116E-04  -.4217524E-04  -.5972855E-04  -.8951205E-04
  -.6421211E-04  -.8690509E-04  -.1867077E-03  -.2233239E-03  -.1760010E-03
  -.1264236E-03  -.1415226E-03  -.1661793E-03  -.1543276E-03  -.1799289E-03
  -.2203858E-03  -.1812438E-03  -.8254039E-04  -.7932816E-04  -.2064278E-03
  -.2594786E-03  -.2159694E-03  -.2106358E-03  -.1424147E-03  -.7058510E-04
  -.9408566E-04  -.1230069E-03  -.1423598E-03  -.1473278E-03  -.5605163E-04
   .1111020E-04  -.5332208E-04  -.1583918E-03  -.1416643E-03  -.9569946E-04
  -.1320121E-03  -.7701525E-04   .1392954E-04   .2125074E-04  -.2923569E-04
  -.8277152E-04  -.6663633E-04  -.4924041E-04  -.1046316E-03  -.1371979E-03
   .2936893E-05   .1159167E-03  -.1153974E-04  -.1776185E-03  -.1188616E-03
   .4424190E-04   .1949176E-04  -.9303553E-04  -.1135324E-03  -.3449719E-04
   .2820947E-04   .5141797E-05  -.5299001E-04  -.1452098E-04   .2263591E-04
  -.4272570E-04  -.7911641E-04  -.1923916E-04   .2356698E-04  -.3408555E-05
  -.3167016E-04  -.5225900E-04  -.2470805E-04   .2175849E-04   .3300209E-04
   .5534317E-05  -.7192176E-04  -.1280994E-03  -.3606481E-04   .8206758E-04
  -.1862389E-04  -.1510474E-03  -.8360890E-04   .1254849E-04  -.8340939E-05
  -.6388805E-04  -.1532107E-04   .5981785E-04   .1584505E-04  -.2437786E-04
  -.3511120E-04  -.7666794E-04  -.8869181E-04  -.9451235E-04  -.9516841E-04
  -.7842663E-04  -.7857712E-04  -.9355791E-04  -.7408827E-04  -.6725667E-04
  -.4393728E-04  -.1342005E-04  -.2573437E-04  -.1823200E-04   .1969627E-04
   .9888927E-06  -.1419563E-04   .2418763E-04   .3661261E-04  -.7144284E-05
  -.6928820E-04  -.3157685E-04   .7648631E-04   .7037384E-04  -.1346381E-04
  -.3911672E-05   .2714337E-04   .1313401E-04   .5533688E-04   .8589649E-04
   .1040244E-04  -.3766784E-04   .5166380E-04   .1149976E-03   .5895299E-04
   .1048227E-04   .3054700E-04   .2112539E-04   .1106148E-04   .4703928E-04
   .5590179E-04   .3790730E-04   .6588437E-04   .1248333E-03   .1077844E-03
   .1632359E-04  -.1469203E-04   .3147006E-04   .7017741E-04   .6086600E-05
  -.1022077E-03  -.7737665E-04   .5267023E-04   .7613270E-04  -.8913999E-05
   .4229511E-05   .5578783E-04   .3373495E-04   .1366155E-04   .4643804E-04
   .7165033E-04   .1341254E-04   .2711568E-05   .6511625E-04   .5312450E-04
   .7173645E-05   .5558549E-04   .1095029E-03   .7154950E-04   .4732877E-04
   .2114465E-04  -.1388581E-04   .3830226E-04   .9112762E-04   .8821970E-04
   .8016358E-04   .4365237E-04   .1150964E-05   .3004551E-05   .4847101E-04
   .8694675E-04   .1264367E-03   .1504737E-03   .9726715E-04   .8058241E-04
   .1000127E-03   .4340103E-04   .3830049E-04   .1203151E-03   .1199563E-03
   .1054136E-03   .1567168E-03   .1666565E-03   .1067633E-03   .4525550E-04
   .1472410E-04   .6610600E-04   .1210761E-03   .1299223E-03   .1029050E-03
   .7875220E-04   .8908272E-04   .1125884E-03   .7596367E-04   .1370630E-04
  -.1067476E-04   .6281744E-04   .1684402E-03   .1608137E-03   .9057212E-04
   .9034235E-04   .1667039E-03   .1973101E-03   .1551898E-03   .1135548E-03
   .1106891E-03   .9069016E-04   .6682767E-04   .6956023E-04   .9638851E-04
   .6597295E-04   .7321453E-04   .1600993E-03   .1775779E-03   .1513544E-03
   .1355807E-03   .1052989E-03   .1198012E-03   .1685119E-03   .1580055E-03
   .5798422E-04   .1382237E-04   .7803244E-04   .1227896E-03   .9392577E-04
   .8189912E-04   .1116769E-03   .1090106E-03   .6477693E-04   .8671999E-04
   .1201318E-03   .1445892E-03   .1329690E-03   .1005362E-03   .1072014E-03
   .8473960E-04   .8325948E-04   .1110173E-03   .1148987E-03   .1233792E-03
   .6119505E-04   .5018180E-05   .1034148E-03   .1666374E-03   .1347357E-03
   .1263305E-03   .1560165E-03   .1378395E-03   .1044065E-03   .1271221E-03
   .2820075E-03   .3608765E-03   .1855917E-03   .6201408E-04   .1503142E-03
   .2632716E-03   .2320375E-03   .1268789E-03   .1317721E-03   .2028519E-03
   .2318307E-03   .2442549E-03   .2443986E-03   .1945581E-03   .1639899E-03
   .1443845E-03   .1375963E-03   .2188458E-03   .2538480E-03   .1620799E-03
   .6469464E-04   .1279911E-03   .2423523E-03   .2357526E-03   .2107633E-03
   .2068479E-03   .1582357E-03   .6620368E-04   .7143899E-04   .1724131E-03
   .1331428E-03   .1574772E-05   .2930473E-04   .1448552E-03   .1105182E-03
   .3601432E-04   .4881651E-04   .1247803E-03   .1955204E-03   .2195808E-03
   .1460170E-03   .9761605E-04   .1257984E-03   .1862771E-03   .1989017E-03
   .1602361E-03   .1320662E-03   .1877484E-03   .2626338E-03   .2211119E-03
   .1281498E-03   .1226004E-03   .1708610E-03   .1852252E-03   .1723127E-03
   .1728043E-03   .2213822E-03   .2479085E-03   .1772881E-03   .1928294E-03
   .2664353E-03   .1932018E-03   .9255722E-04   .1546648E-03   .2044568E-03
   .1585826E-03   .8729545E-04   .9008204E-04   .1504190E-03   .1641173E-03
   .1636971E-03   .1428859E-03   .5043504E-04   .4857503E-04   .1662700E-03
   .2327734E-03   .1523516E-03   .8582813E-04   .1087770E-03   .1584291E-03
   .2035659E-03   .1878700E-03   .1702917E-03   .1755377E-03   .1843053E-03
   .2439128E-03   .2862116E-03   .2588016E-03   .2084958E-03   .1498556E-03
   .6304717E-04   .9454256E-04   .2005567E-03   .1956873E-03   .8015036E-04
   .1342605E-03   .2740839E-03   .2168007E-03   .1153421E-03   .1234066E-03
   .1206063E-03   .1712303E-03   .3073699E-03   .3334157E-03   .2354532E-03
   .1849883E-03   .2426001E-03   .3152526E-03   .2877546E-03   .1888269E-03
   .1692137E-03   .2258486E-03   .1900557E-03   .8743337E-04   .1248761E-03
   .2464259E-03   .2729089E-03   .2438233E-03   .2171922E-03   .2101076E-03
   .1840184E-03   .1157946E-03   .1245848E-03   .1890029E-03   .2347661E-03
   .2107112E-03   .1881010E-03   .2063628E-03   .2305802E-03   .2531548E-03
   .2229118E-03   .1584243E-03   .1896997E-03   .2349399E-03   .2037442E-03
   .1857629E-03   .2112813E-03   .2204783E-03   .1902323E-03   .1914387E-03
   .2091623E-03   .2142786E-03   .2602646E-03   .2789280E-03   .2604201E-03
   .2339922E-03   .2088612E-03   .1861293E-03   .1887656E-03   .1826120E-03
   .1723592E-03   .1890751E-03   .1971885E-03   .2060883E-03   .2403446E-03
   .2950785E-03   .2705804E-03   .1836687E-03   .1575492E-03   .2486860E-03
   .3129644E-03   .2401833E-03   .2340058E-03   .2986203E-03   .3023127E-03
   .2458710E-03   .2014678E-03   .1866770E-03   .1885391E-03   .1482363E-03
   .1159410E-03   .1828536E-03   .2820015E-03   .3129586E-03   .2843805E-03
   .2325893E-03   .1798904E-03   .1669621E-03   .2050764E-03   .2391593E-03
   .2293205E-03   .1955774E-03   .1933824E-03   .1911156E-03   .1817487E-03
   .2142791E-03   .2694594E-03   .2661541E-03   .2332335E-03   .1963099E-03
   .1435616E-03   .1909015E-03   .2600829E-03   .2569349E-03   .2196969E-03
   .1943271E-03   .1857142E-03   .1327551E-03   .1410301E-03   .2488637E-03
   .3335050E-03   .3216715E-03   .2019072E-03   .1463828E-03   .2474886E-03
   .3466395E-03   .3028812E-03   .2302587E-03   .2544828E-03   .2963824E-03
   .2783850E-03   .2587013E-03   .2492178E-03   .2358075E-03   .2392836E-03
   .2727140E-03   .3101196E-03   .3324239E-03   .3183145E-03   .2810675E-03
   .2537341E-03   .2405099E-03   .1975042E-03   .2127256E-03   .2507852E-03
   .2385217E-03   .1781464E-03   .1507399E-03   .2694026E-03   .3995045E-03
   .3587926E-03   .2471673E-03   .2394072E-03   .2834478E-03   .2741845E-03
   .2715369E-03   .3151740E-03   .3046832E-03   .2259871E-03   .2247820E-03
   .2764600E-03   .2656929E-03   .2221946E-03   .2208484E-03   .2511046E-03
   .1995501E-03   .1035991E-03   .1375650E-03   .2417576E-03   .2874742E-03
   .2610931E-03   .2661243E-03   .3004111E-03   .2490530E-03   .1959828E-03
   .1993438E-03   .2094666E-03   .2388053E-03   .2424400E-03   .1815844E-03
   .1370873E-03   .1958556E-03   .2217364E-03   .1944319E-03   .2232320E-03
   .2536185E-03   .2465512E-03   .2608344E-03   .2721003E-03   .2142338E-03
   .1614041E-03   .1988325E-03   .2673996E-03   .2720700E-03   .2576581E-03
   .2136451E-03   .1448045E-03   .2084096E-03   .2767379E-03   .2668518E-03
   .2768648E-03   .2583662E-03   .2038238E-03   .2271676E-03   .2713618E-03
   .2216317E-03   .1506474E-03   .1599754E-03   .2467517E-03   .2953200E-03
   .2636455E-03   .2438150E-03   .2286987E-03   .2095628E-03   .2653324E-03
   .3038396E-03   .2725034E-03   .2791765E-03   .2841503E-03   .2085757E-03
   .1575878E-03   .2219099E-03   .2883752E-03   .2483146E-03   .1765129E-03
   .1527561E-03   .1316871E-03   .1929736E-03   .2775394E-03   .2473472E-03
   .1394964E-03   .1181331E-03   .1933460E-03   .2317147E-03   .2041386E-03
   .2185891E-03   .2321661E-03   .1895124E-03   .1375524E-03   .1245298E-03
   .1670277E-03   .1986476E-03   .1972898E-03   .2022899E-03   .2600306E-03
   .2822224E-03   .2571492E-03   .2462963E-03   .2700063E-03   .2196406E-03
   .1173892E-03   .1429837E-03   .2844775E-03   .2856636E-03   .1968624E-03
   .2100442E-03   .3145458E-03   .2973623E-03   .1817919E-03   .1683671E-03
   .2344949E-03   .2249015E-03   .1975750E-03   .2310754E-03   .2434645E-03
   .2267938E-03   .2335740E-03   .2509236E-03   .2783661E-03   .2483063E-03
   .1666304E-03   .1452276E-03   .2142808E-03   .2398750E-03   .1847825E-03
   .1872186E-03   .2678061E-03   .2723795E-03   .2018204E-03   .1545608E-03
   .1771940E-03   .2206549E-03   .2645127E-03   .2945301E-03   .2537353E-03
   .1965500E-03   .1886279E-03   .1963572E-03   .1680104E-03   .1440361E-03
   .1747818E-03   .2095690E-03   .2213974E-03   .2085673E-03   .1191990E-03
   .1003429E-03   .1936154E-03   .2186027E-03   .1974283E-03   .2110216E-03
   .1976868E-03   .1810566E-03   .2081729E-03   .2882284E-03   .2880082E-03
   .1052831E-03   .1219415E-04   .1458585E-03   .3087700E-03   .3017155E-03
   .1740546E-03   .1135029E-03   .1738202E-03   .2467796E-03   .2431554E-03
   .2326095E-03   .2417708E-03   .2232623E-03   .1903238E-03   .2183890E-03
   .3239420E-03   .2761292E-03   .9468104E-04   .1039669E-03   .2935045E-03
   .3200102E-03   .1567282E-03   .9242737E-04   .1432842E-03   .1985516E-03
   .2363683E-03   .2529008E-03   .2513339E-03   .2531212E-03   .2938989E-03
   .3275034E-03   .2638908E-03   .2084517E-03   .2158703E-03   .2170108E-03
   .2127508E-03   .1867797E-03   .1603438E-03   .2198253E-03   .2528270E-03
   .1804919E-03   .1184793E-03   .9683820E-04   .1519534E-03   .2297180E-03
   .1580439E-03   .6452696E-04   .1507327E-03   .2794833E-03   .2509412E-03
   .1630291E-03   .1461390E-03   .1822301E-03   .2128212E-03   .2063211E-03
   .1906683E-03   .1559305E-03   .1280734E-03   .9053330E-04   .1084479E-03
   .2019782E-03   .1866454E-03   .7771643E-04   .7289246E-04   .1694291E-03
   .1858514E-03   .1594089E-03   .1856877E-03   .1804066E-03   .1093867E-03
   .9806225E-04   .1385644E-03   .2087130E-03   .2512508E-03   .2032217E-03
   .2036647E-03   .2149987E-03   .1345558E-03   .9407806E-04   .1088632E-03
   .1298888E-03   .1818291E-03   .2388212E-03   .2581059E-03   .1967299E-03
   .1162862E-03   .1187895E-03   .1679596E-03   .2127219E-03   .2064678E-03
   .1558012E-03   .1282355E-03   .8657655E-04   .1190633E-03   .1771882E-03
   .1736904E-03   .1590266E-03   .1702393E-03   .1559874E-03   .1706938E-03
   .1865731E-03   .1183301E-03   .1189767E-03   .2376500E-03   .2283565E-03
   .9078694E-04   .5911945E-04   .1108318E-03   .1564781E-03   .1921825E-03
   .2136382E-03   .1952914E-03   .1331095E-03   .1028876E-03   .9945669E-04
   .6454154E-04  -.2471628E-04  -.2921132E-05   .1647552E-03   .2369761E-03
   .1954932E-03   .1213580E-03   .3892556E-04   .6755845E-04   .1296333E-03
   .1195806E-03   .1651182E-03   .2203453E-03   .1674191E-03   .5879052E-04
   .3409738E-04   .9373460E-04   .1694195E-03   .1680139E-03   .1100998E-03
   .1027816E-03   .1474998E-03   .1756971E-03   .1268228E-03   .7534719E-04
   .1121157E-03   .1701017E-03   .1516581E-03   .1414595E-03   .1417404E-03
   .1184666E-03   .1554457E-03   .2145633E-03   .1462965E-03   .2847362E-04
   .2816915E-04   .1226817E-03   .1888149E-03   .1574219E-03   .9119557E-04
   .9427974E-04   .1241161E-03   .1105106E-03   .1036660E-03   .1261086E-03
   .1196421E-03   .7488841E-04   .1063317E-03   .1446897E-03   .1199223E-03
   .1358621E-03   .1855333E-03   .2035209E-03   .1535673E-03   .4999036E-04
   .6938894E-04   .1599833E-03   .2301781E-03   .2258183E-03   .1316465E-03
   .6890593E-04   .8173293E-04   .1273935E-03   .1261003E-03   .1269585E-03
   .1335859E-03   .1131467E-03   .7976270E-04   .7820670E-04   .8289992E-04
   .1053973E-03   .1462981E-03   .1375837E-03   .4799373E-04  -.5253550E-04
   .7264475E-05   .1152117E-03   .1145081E-03   .6924889E-04   .3558554E-04
   .6780784E-04   .1085809E-03   .1016389E-03   .1168150E-03   .1324333E-03
   .1100274E-03   .7192312E-04   .8773713E-04   .1431206E-03   .1274754E-03
   .4259479E-04   .5996651E-04   .1701016E-03   .1703139E-03   .7507727E-04
   .6385663E-04   .1333671E-03   .1302615E-03   .3113284E-04   .3690547E-04
   .2107716E-03   .2509944E-03   .1042354E-03   .5111056E-04   .1623032E-03
   .2517040E-03   .2115025E-03   .1080142E-03   .1192998E-03   .1663169E-03
   .1481473E-03   .1507974E-03   .1750548E-03   .1886818E-03   .1687316E-03
   .1331056E-03   .1042481E-03   .1175356E-03   .1356306E-03   .1163720E-03
   .1131415E-03   .1360438E-03   .1451332E-03   .1391431E-03   .1244410E-03
   .9437979E-04   .5131017E-04   .1016250E-04   .6240661E-04   .1163860E-03
   .4812139E-04   .2031184E-04   .8796227E-04   .1147444E-03   .5949380E-04
  -.4869499E-06   .4470194E-04   .9157570E-04   .4472850E-04   .2135602E-05
   .2493509E-04   .5362083E-04   .8414446E-04   .9067977E-04   .6076875E-04
   .2703218E-04   .3596229E-04   .7569262E-04   .9599917E-04   .7361209E-04
   .9880647E-04   .8921335E-04   .1341242E-04   .2119857E-04   .3324720E-04
  -.1082656E-04   .1070800E-04   .1007808E-03   .1346196E-03   .9543416E-04
   .6760392E-04   .4102999E-04   .3445336E-04   .5124849E-04   .7696139E-04
   .1223443E-03   .8690580E-04  -.3311132E-05   .1299577E-05  -.1149115E-04
  -.7756223E-04  -.6096628E-05   .1396070E-03   .9279064E-04  -.7973620E-06
   .9983532E-05   .1402956E-04  -.2668255E-04  -.2124546E-04  -.2911199E-04
  -.4056256E-04   .2289030E-04   .4612887E-04  -.1611210E-06  -.1734782E-04
   .8318848E-05  -.3595885E-05   .1450311E-04   .7056383E-04   .3922610E-04
  -.4002632E-04  -.7211473E-05   .8500500E-04   .1121968E-03   .9525075E-04
   .1805275E-04   .5420832E-06   .5862538E-04   .5359532E-04   .2293227E-04
   .3029346E-04   .4758298E-04   .4788372E-04   .3260410E-04   .6229930E-05
   .2371925E-04   .6480840E-04   .4219446E-04  -.2230038E-05  -.5271213E-04
  -.7202436E-04  -.2910612E-06   .6875636E-04   .1457854E-04  -.7566210E-05
   .3059800E-04  -.8232710E-05  -.1121659E-04   .2612368E-04   .5478885E-04
   .2810364E-04   .2649045E-04   .9938455E-04   .1423687E-03   .1271741E-03
   .6607039E-04   .1959872E-04   .2658856E-04   .8082777E-04   .1067286E-03
   .1243499E-04  -.9750827E-05   .8902341E-04   .5648901E-04  -.2043568E-04
  -.1365692E-04  -.1573546E-04  -.4859727E-04   .1758822E-05   .1810174E-04
  -.8092463E-04  -.6581226E-04   .8729928E-05   .2272414E-04  -.3726718E-04
  -.1058054E-03  -.5622024E-04   .2339251E-04   .2121578E-04   .4356147E-04
   .1014700E-03   .8943715E-04   .3061043E-04  -.3861647E-04  -.4408097E-04
  -.1582361E-04  -.2027783E-05  -.6349337E-05   .4107353E-04   .1058948E-03
   .7448647E-04  -.1016393E-05  -.3923126E-04   .3124062E-05   .9129640E-04
   .1041123E-03   .3412324E-04  -.9189698E-05  -.9511618E-05  -.1783254E-04
  -.3138321E-04  -.6803713E-04  -.6355836E-04   .1454033E-04   .4553489E-04
   .2365473E-04   .2492112E-04   .2772295E-04  -.1723675E-05  -.2475210E-04
  -.1944170E-04  -.4922395E-04  -.1153748E-04   .1394720E-04  -.1226942E-04
  -.6708134E-04  -.1154074E-03  -.2487610E-04   .9912123E-04   .6868191E-04
  -.5948083E-04  -.9226550E-04   .4335516E-04   .9302667E-04   .1472026E-04
  -.4099871E-04  -.4467232E-04  -.5353040E-04  -.1397909E-03  -.1119749E-03
   .5603236E-04   .7134227E-04  -.2039597E-04  -.3189144E-04   .4182948E-04
   .1043916E-03   .6808616E-04  -.1229355E-04   .1877574E-04   .6693414E-04
   .3621251E-04  -.3258904E-05  -.1882958E-04   .3441447E-04   .6585794E-04
   .2293176E-04   .8842592E-05   .1106119E-04  -.5410888E-04  -.7612484E-04
  -.2349131E-04   .4363258E-04   .7378550E-04   .2452946E-04  -.3444858E-04
  -.3835665E-04  -.4731497E-04  -.1253458E-03  -.1289028E-03  -.1395843E-04
   .6480342E-04   .3558581E-04  -.4937382E-04  -.5773673E-04  -.2418315E-04
  -.8739380E-04  -.9632611E-04  -.1784131E-04  -.5675747E-05  -.1647665E-04
  -.2002356E-04  -.2530165E-04  -.5852275E-04  -.1221645E-03  -.6980205E-04
   .3437751E-04   .7313619E-04   .1007593E-03   .9020300E-04   .1086867E-04
  -.8948727E-04  -.1662996E-03  -.6546530E-04   .5099430E-04   .2575129E-04
  -.2274029E-04  -.3431391E-04  -.4623058E-04  -.6634086E-04  -.2968170E-04
   .1560066E-04  -.1700981E-04  -.8353514E-04  -.8201199E-04  -.5203967E-04
  -.6491158E-04  -.7905963E-04  -.8323463E-04  -.4837185E-04   .1355417E-04
  -.4573965E-04  -.1780184E-03  -.1843778E-03  -.9142215E-04  -.8752500E-05
  -.2923134E-04  -.9773974E-04  -.4583210E-04   .3383886E-05  -.1867045E-04
  -.5560779E-04  -.1360119E-03  -.1730677E-03  -.1366356E-03  -.3981472E-04
   .2866960E-04   .2591320E-04   .4909135E-05  -.4476035E-05  -.3981600E-04
  -.8835835E-04  -.1034318E-03  -.1096184E-03  -.6363587E-04  -.2782758E-04
  -.3400676E-04  -.3699293E-04  -.8353900E-04  -.1287734E-03  -.4081358E-04
   .2544982E-04  -.4286338E-04  -.1253676E-03  -.1702730E-03  -.1401752E-03
  -.1311671E-03  -.1553649E-03  -.9340015E-04   .1619276E-04   .4740390E-05
  -.9230274E-04  -.8943954E-04  -.4019821E-05  -.3844609E-04  -.1655848E-03
  -.1893266E-03  -.8342986E-04  -.4111574E-04  -.6997306E-04  -.6680499E-04
  -.1973841E-04   .4582098E-05  -.5177145E-04  -.1361634E-03  -.1171902E-03
  -.9972672E-05   .3700313E-04  -.2465768E-04  -.7373636E-04  -.1752770E-03
  -.2313404E-03  -.1502159E-03  -.2409376E-04   .1560551E-04  -.4610240E-04
  -.1211952E-03  -.1415858E-03  -.1202187E-03  -.7189832E-04  -.1978956E-04
   .1390718E-04   .4646316E-05  -.9647901E-04  -.1862880E-03  -.1969223E-03
  -.9676639E-04  -.3704711E-04  -.6516783E-04  -.4896950E-04  -.7327187E-04
  -.1486398E-03  -.1337022E-03  -.6753704E-04  -.4883080E-04  -.7738727E-04
  -.1094221E-03  -.1060726E-03  -.1003949E-03  -.8838291E-04  -.7890398E-04
  -.1073268E-03  -.1210805E-03  -.5936632E-04   .2627327E-05  -.4894914E-05
  -.5577958E-04  -.1025445E-03  -.1369957E-03  -.7405042E-04   .1748102E-04
  -.2179297E-06  -.5116243E-04  -.7283976E-04  -.6934883E-04  -.3765569E-04
  -.2826290E-04  -.1100841E-03  -.2117525E-03  -.1576266E-03  -.5536366E-04
  -.7354990E-04  -.7621987E-04  -.9479669E-04  -.1566670E-03  -.1403750E-03
  -.8670651E-04  -.1025634E-03  -.1297587E-03  -.8824576E-04  -.1050034E-03
  -.1922365E-03  -.1691595E-03  -.6907605E-04  -.2854074E-04  -.9311890E-04
  -.1493514E-03  -.1088007E-03  -.3742510E-04  -.5986768E-04  -.1337700E-03
  -.5812212E-04   .6641968E-04   .7420141E-05  -.1306128E-03  -.1437128E-03
  -.8464905E-04  -.5687839E-04  -.6200660E-04  -.8341122E-04  -.5742721E-04
  -.7416536E-04  -.8870787E-04  -.5450800E-04  -.8895494E-04  -.1047388E-03
  -.7236466E-04  -.3796852E-04  -.2470191E-04  -.3019711E-04  -.3289526E-04
  -.5834448E-04  -.1378756E-03  -.1526481E-03  -.9400495E-04  -.2811299E-04
  -.1630164E-04  -.1299331E-03  -.2235849E-03  -.1465803E-03  -.2119378E-04
  -.6232435E-04  -.1428249E-03  -.7530146E-04  -.4464542E-05  -.7056086E-04
  -.1793403E-03  -.1676815E-03  -.8561572E-04  -.4498457E-04  -.5629873E-04
  -.4229438E-04  -.6574311E-04  -.1215126E-03  -.1246159E-03  -.1338939E-03
  -.1166621E-03  -.1386235E-03  -.2140566E-03  -.1765824E-03  -.6482986E-04
  -.5761025E-04  -.1238997E-03  -.1120785E-03  -.9328536E-04  -.1614920E-03
  -.1754063E-03  -.8497530E-04  -.1135504E-03  -.1983649E-03  -.1429241E-03
  -.6587778E-04  -.7710460E-04  -.1104608E-03  -.1199087E-03  -.1402566E-03
  -.1572280E-03  -.1211041E-03  -.5591434E-04  -.2714018E-04  -.5329680E-04
  -.1379887E-03  -.1873021E-03  -.8794738E-04  -.2544026E-04  -.1404120E-03
  -.2480942E-03  -.1977203E-03  -.7686103E-04  -.6295948E-04  -.1176129E-03
  -.8165151E-04  -.6367908E-04  -.1222981E-03  -.1625189E-03  -.1751317E-03
  -.1706127E-03  -.1903044E-03  -.1386473E-03  -.8717831E-04  -.1157881E-03
  -.1532818E-03  -.1680364E-03  -.1150475E-03  -.7391395E-04  -.9223563E-04
  -.9593776E-04  -.5302037E-04  -.9950626E-04  -.1932685E-03  -.1907315E-03
  -.1730211E-03  -.1594845E-03  -.9003990E-04  -.3903243E-04  -.6157560E-04
  -.8286096E-04  -.8422709E-04  -.5529706E-04  -.1952275E-04  -.6452254E-04
  -.1558661E-03  -.1830487E-03  -.1420781E-03  -.1354489E-03  -.1581897E-03
  -.1386249E-03  -.1042617E-03  -.9738999E-04  -.1253046E-03  -.1767388E-03
  -.1603237E-03  -.1224959E-03  -.1732937E-03  -.2152499E-03  -.1404146E-03
  -.1077171E-03  -.1206756E-03  -.4768849E-04  -.2887257E-04  -.9490100E-04
  -.1386821E-03  -.1400699E-03  -.7840891E-04  -.1514592E-04  -.5189324E-04
  -.1027724E-03  -.5562480E-04  -.2685257E-04  -.6097302E-04  -.8106455E-04
  -.1289448E-03  -.1293602E-03  -.9856504E-04  -.1013915E-03  -.1164856E-03
  -.1201754E-03  -.1054820E-03  -.8118215E-04  -.8795765E-04  -.1326403E-03
  -.1882944E-03  -.1529302E-03  -.3144804E-04   .1711624E-04  -.6304438E-04
  -.1315821E-03  -.8644006E-04  -.2223117E-04  -.5052474E-04  -.9749585E-04
  -.1194923E-03  -.1773663E-03  -.2262698E-03  -.1520351E-03  -.1236245E-03
  -.1475442E-03  -.1420332E-03  -.1720717E-03  -.2330221E-03  -.2394659E-03
  -.2740226E-03  -.2141213E-03  -.9144213E-04  -.8286838E-04  -.1046253E-03
  -.1248607E-03  -.1730582E-03  -.1932217E-03  -.2054883E-03  -.1447372E-03
  -.8606630E-04  -.9470975E-04  -.1371490E-03  -.1860804E-03  -.1483811E-03
  -.3785893E-04  -.1416354E-04  -.9463127E-04  -.1779913E-03  -.1808183E-03
  -.1766561E-03  -.2543229E-03  -.2150037E-03  -.1143220E-03  -.7762901E-04
  -.1288865E-03  -.1844890E-03  -.1858087E-03  -.1539343E-03  -.6908238E-04
   .2446179E-04   .4646413E-05  -.1210855E-03  -.2280239E-03  -.1663792E-03
  -.8697621E-04  -.1105202E-03  -.1073310E-03  -.6552209E-04  -.7716385E-04
  -.1092514E-03  -.7006004E-04   .2490875E-04   .3134201E-04  -.5536151E-04
  -.7057562E-04  -.5724301E-04  -.1255861E-03  -.1794801E-03  -.1170687E-03
  -.5139163E-04  -.7208925E-04  -.9786648E-04  -.1085542E-03  -.1097210E-03
  -.9899835E-04  -.1448445E-03  -.2041293E-03  -.1309453E-03  -.4038749E-04
  -.1056373E-03  -.1419085E-03  -.7822364E-04  -.3933657E-04  -.3644011E-04
  -.1331306E-04  -.6317568E-04  -.1680619E-03  -.2041747E-03  -.1425238E-03
  -.9308368E-04  -.1611546E-03  -.2056017E-03  -.1131541E-03  -.8317335E-05
  -.2480064E-04  -.1112284E-03  -.1380597E-03  -.1065674E-03  -.1238667E-03
  -.1413656E-03  -.8747095E-04  -.2079027E-04  -.3646326E-04  -.1178702E-03
  -.1782449E-03  -.1432353E-03  -.5589754E-04  -.8052117E-04  -.1935623E-03
  -.1982756E-03  -.1534933E-03  -.2002310E-03  -.2097489E-03  -.1669904E-03
  -.1123678E-03  -.5500566E-04  -.7170859E-04  -.1266960E-03  -.1484984E-03
  -.1675971E-03  -.1682486E-03  -.1422669E-03  -.2051453E-03  -.2594619E-03
  -.1755469E-03  -.7942809E-04  -.9774791E-04  -.1296543E-03  -.1355618E-03
  -.1147950E-03  -.1529447E-03  -.2562642E-03  -.2712187E-03  -.1591694E-03
  -.5930381E-04  -.8541196E-04  -.1422258E-03  -.1029827E-03  -.1051092E-03
  -.1716804E-03  -.1931175E-03  -.1343633E-03  -.8061082E-04  -.1150512E-03
  -.1408042E-03  -.8755468E-04  -.6822223E-04  -.1425242E-03  -.1492269E-03
  -.9404741E-04  -.7512388E-04  -.1266698E-03  -.1428080E-03  -.9411439E-04
  -.7365314E-04  -.8980366E-04  -.1440989E-03  -.1712975E-03  -.1079626E-03
  -.5136430E-04  -.7428883E-04  -.8692115E-04  -.8954090E-04  -.1469912E-03
  -.1335498E-03  -.7051311E-04  -.7543395E-04  -.1472117E-03  -.2219046E-03
  -.1574169E-03  -.4687038E-04  -.3528289E-04  -.1001156E-03  -.1351819E-03
  -.1424324E-03  -.1697925E-03  -.1196591E-03  -.2152175E-04  -.1172484E-04
  -.5749263E-04  -.8335523E-04  -.1005923E-03  -.1381365E-03  -.1893532E-03
  -.1817326E-03  -.1491873E-03  -.1386774E-03  -.1328339E-03  -.9396894E-04
  -.1390466E-03  -.1870336E-03  -.1268062E-03  -.7956490E-04  -.1026713E-03
  -.1278110E-03  -.1238679E-03  -.1129042E-03  -.1307194E-03  -.1825720E-03
  -.1620144E-03  -.7528923E-04  -.4865167E-04  -.1292527E-03  -.1792390E-03
  -.1201417E-03  -.6850504E-04  -.7903326E-04  -.1322603E-03  -.1553560E-03
  -.1596441E-03  -.1719512E-03  -.1705430E-03  -.1275197E-03  -.6555860E-04
  -.3975158E-04  -.5635610E-04  -.9888421E-04  -.1203496E-03  -.1444250E-03
  -.2065467E-03  -.2152610E-03  -.2017903E-03  -.1350281E-03  -.8211323E-04
  -.1023675E-03  -.1585334E-03  -.1585621E-03  -.6830608E-04  -.6385731E-04
  -.1497162E-03  -.1149480E-03  -.7899769E-04  -.1499880E-03  -.1980501E-03
  -.2147873E-03  -.1666476E-03  -.1024352E-03  -.8007423E-04  -.9076138E-04
  -.1426582E-03  -.1181039E-03  -.4532520E-04  -.3098027E-04  -.9336239E-04
  -.1433618E-03  -.1091883E-03  -.6569055E-04  -.8103136E-04  -.1202161E-03
  -.1859847E-04   .5866254E-04  -.5478223E-04  -.1840165E-03  -.1048285E-03
   .2516621E-04   .1448091E-05  -.9032392E-04  -.1040758E-03  -.8719821E-04
  -.1087469E-03  -.1392214E-03  -.1070106E-03  -.8239669E-04  -.8259089E-04
  -.5260711E-04  -.5275429E-04  -.7483214E-04  -.9738037E-04  -.1124300E-03
  -.1121830E-03  -.1255855E-03  -.1733861E-03  -.1529960E-03  -.7730429E-04
  -.6509685E-04  -.1307886E-03  -.2187756E-03  -.1714749E-03  -.3691293E-04
  -.4555469E-04  -.1629944E-03  -.1336413E-03  -.3452188E-04  -.9336261E-04
  -.1547876E-03  -.9819314E-04  -.7301826E-04  -.1183047E-03  -.1039943E-03
  -.5033470E-04  -.9211422E-04  -.1980435E-03  -.1563489E-03  -.2877337E-04
   .1517750E-04  -.4978865E-04  -.6661703E-04   .3088533E-05  -.3045483E-04
  -.1309487E-03  -.1346055E-03  -.1138706E-03  -.1153024E-03  -.1024609E-03
  -.7281886E-04  -.6010546E-04  -.4808684E-04  -.1102921E-03  -.2042492E-03
  -.2108355E-03  -.1549348E-03  -.1245528E-03  -.1678406E-03  -.1777286E-03
  -.8875417E-04  -.2746204E-04  -.5472759E-04  -.8911467E-04  -.1115425E-03
  -.8235171E-04  -.5313665E-04  -.9249816E-04  -.9917108E-04  -.1022957E-03
  -.1537003E-03  -.1803563E-03  -.1985951E-03  -.1765870E-03  -.1589858E-03
  -.1224444E-03  -.6225186E-04  -.6732306E-04  -.1345786E-03  -.1565865E-03
  -.8072486E-04  -.3212619E-04  -.8241110E-04  -.9780678E-04  -.1045203E-03
  -.1871241E-03  -.2139334E-03  -.1627042E-03  -.1337361E-03  -.1364409E-03
  -.1232997E-03  -.1177699E-03  -.1050540E-03  -.1050287E-03  -.1464791E-03
  -.1467036E-03  -.1203687E-03  -.8852694E-04  -.4248284E-04  -.2402714E-04
  -.5935152E-04  -.8622360E-04  -.4549567E-04   .1626055E-04  -.5757221E-05
  -.1008354E-03  -.1221887E-03  -.5252164E-04  -.1333777E-04  -.6467811E-04
  -.1307367E-03  -.1230825E-03  -.8109191E-04  -.9008199E-04  -.1417688E-03
  -.1082178E-03  -.7494230E-04  -.1303394E-03  -.1421686E-03  -.8113638E-04
  -.4078573E-04  -.8380903E-04  -.1137473E-03  -.9177285E-04  -.7920381E-04
  -.1257613E-03  -.1654580E-03  -.1100009E-03  -.8467784E-04  -.1197941E-03
  -.1135588E-03  -.7021605E-04  -.8593106E-05   .4617189E-04  -.2604930E-05
  -.1027441E-03  -.1669146E-03  -.1125458E-03  -.1349960E-04  -.3303936E-04
  -.7231812E-04  -.7389091E-04  -.5419048E-04  -.1203010E-04  -.3460056E-04
  -.1345852E-03  -.2159366E-03  -.1473364E-03  -.3948733E-04  -.4674636E-04
  -.7987085E-04  -.9666269E-04  -.1255265E-03  -.2125043E-03  -.1957114E-03
  -.8161111E-04  -.7978222E-04  -.1108545E-03  -.1042426E-03  -.1151129E-03
  -.8064693E-04  -.4575277E-04  -.3892729E-04   .7066751E-05   .5269485E-04
   .9321935E-05  -.8803884E-04  -.1215617E-03  -.9824074E-04  -.4010826E-04
  -.1532460E-04  -.7113679E-04  -.1032034E-03  -.6951331E-04  -.3276472E-04
  -.7800644E-04  -.1201522E-03  -.7906615E-04  -.7200283E-04  -.1208647E-03
  -.1256351E-03  -.5607152E-04  -.4281220E-04  -.1209605E-03  -.1266913E-03
  -.6906631E-04  -.2527857E-04  -.1194552E-04  -.8020593E-04  -.1337454E-03
  -.1313138E-03  -.7415130E-04  -.7671185E-04  -.1335363E-03  -.5584320E-04
   .9902834E-04   .5683502E-04  -.9946143E-04  -.1178093E-03  -.2114842E-04
   .2092079E-04  -.3190187E-04  -.6772922E-04  -.3091446E-04   .1967846E-04
   .3453358E-04  -.1794337E-04  -.7091165E-04  -.7596510E-04  -.3350255E-04
   .2476540E-04  -.4880501E-04  -.1056244E-03  -.7003252E-04  -.8329565E-04
  -.1202568E-03  -.1271358E-03  -.7764372E-04  -.4974983E-04  -.4107869E-04
  -.2978597E-04  -.5659399E-04  -.1559466E-03  -.1235671E-03   .5001491E-05
   .1680725E-04  -.8800024E-04  -.8816231E-04   .1084148E-04   .5707053E-04
   .2313250E-05  -.3224158E-04  -.6054865E-05   .6246997E-05  -.2457133E-04
  -.3279216E-04  -.7248811E-04  -.1827214E-03  -.1735055E-03  -.8990948E-04
  -.3121815E-04   .2288935E-04   .2704308E-04  -.2109893E-04  -.3555813E-04
  -.3785681E-04  -.3266712E-04  -.2439518E-05  -.4355344E-04  -.1202770E-03
  -.1103917E-03  -.9299746E-05   .1373545E-04  -.5371039E-04  -.1054019E-03
  -.8216165E-04  -.6163377E-04  -.9800858E-04  -.6406903E-04  -.3953376E-05
  -.4824655E-04  -.1059356E-03  -.4068883E-04   .2619818E-04  -.1048261E-03
  -.2251093E-03  -.1168351E-03   .1261051E-04   .1201003E-04  -.6635438E-04
  -.9290608E-04  -.9951054E-04  -.1139631E-03  -.7121428E-04  -.3740126E-04
  -.3109802E-04  -.4035434E-04  -.2174024E-05  -.1174206E-04  -.1004303E-03
  -.1080345E-03  -.3876570E-04   .2780505E-04   .5214773E-04   .4399855E-05
  -.6030225E-04  -.8015371E-04  -.1831357E-04   .7144471E-04   .8125357E-04
   .1842029E-04  -.6594922E-05  -.2885866E-04  -.3233219E-04  -.1129926E-04
   .2669860E-04  -.1183728E-04  -.1093770E-03  -.1192956E-03  -.6693068E-04
  -.3135590E-04  -.7828930E-04  -.9201362E-04  -.6615467E-04  -.8909360E-04
  -.8788779E-04  -.3495825E-04   .6292450E-05   .1623247E-04   .5432030E-04
   .2259473E-04  -.7008956E-04  -.8487809E-04  -.3377998E-04   .2611115E-04
   .4653277E-04  -.2350832E-04  -.6552214E-04  -.2047999E-04   .4886993E-05
   .1046765E-04  -.1616613E-04  -.1031533E-03  -.9622041E-04  -.5846363E-04
  -.7099453E-04  -.5671607E-04  -.4715203E-05   .1478449E-06  -.3351613E-04
  -.4565151E-04  -.3639390E-04  -.3009313E-04  -.4119085E-04  -.7530728E-04
  -.1002589E-03  -.9122577E-04  -.4140956E-04   .1031865E-05  -.3101454E-04
  -.6729063E-04  -.7319642E-04  -.4750987E-04  -.3344425E-04  -.6285606E-04
  -.9758881E-04  -.7092483E-04   .1030820E-04   .1108470E-04  -.6890507E-05
   .1398301E-04   .2137841E-05  -.1728864E-04  -.2222254E-04  -.4782887E-04
  -.2792578E-04  -.4474576E-04  -.6534710E-04  -.1996175E-04   .5578631E-04
   .8312903E-04   .4505614E-04  -.4606329E-04  -.6377813E-04  -.1653988E-04
   .5556330E-04   .1716190E-04  -.3219291E-04  -.8429768E-05  -.5582608E-04
  -.6187933E-04  -.1569686E-04  -.4489371E-05  -.3204913E-04  -.6162646E-04
  -.6591894E-04  -.1002230E-03  -.1387414E-03  -.1045828E-03  -.4190156E-04
  -.3286316E-04  -.4084437E-04  -.4892842E-05   .1991663E-04  -.9123622E-04
  -.1068945E-03   .3240755E-04   .5068382E-04  -.7012737E-04  -.9402866E-04
  -.1250085E-04   .5105412E-04   .4184138E-04  -.3111921E-04  -.8922251E-05
   .1411534E-03   .1205422E-03  -.6136463E-04  -.1330341E-03  -.3668054E-06
   .9328008E-04   .3103066E-04  -.3612768E-04  -.4902908E-04  -.6404362E-04
  -.2688764E-04   .1001138E-04   .1592453E-04   .5391504E-04   .6584059E-04
   .1520776E-04  -.4356349E-04  -.8859353E-04  -.5295107E-04   .2276545E-04
   .3739889E-04   .1171284E-04  -.2347268E-04   .1313025E-05   .5059321E-04
   .6424843E-04   .1501617E-04  -.7838655E-04  -.2381373E-04   .5175230E-04
  -.2445360E-04  -.6723513E-04   .2653443E-05   .3370846E-04  -.1961249E-05
  -.1668047E-04   .1860858E-04   .3410688E-05  -.6376456E-04  -.3986303E-04
   .1589963E-04   .1022448E-05  -.2991131E-04   .3014414E-04   .7825198E-04
   .1978047E-04  -.4735054E-04  -.1645617E-04   .3096418E-04   .2145771E-04
  -.5584433E-04  -.4799931E-04   .3469403E-04  -.7804179E-06  -.7198072E-04
  -.9246262E-04  -.4599235E-04   .5269886E-05  -.1649298E-04  -.1038321E-03
  -.7648994E-04   .4657461E-05  -.3084800E-04  -.4277845E-05   .5829448E-04
   .1448137E-04  -.3404837E-04  -.1746765E-04   .1695782E-04   .3898132E-04
   .3106710E-04   .3829573E-04   .4267430E-04  -.5562467E-05  -.3202216E-04
  -.1509580E-04  -.5622126E-04  -.1498996E-03  -.1061851E-03   .9817727E-05
   .2071913E-04  -.5903927E-04  -.5897635E-04  -.4213327E-05  -.5858446E-05
  -.1734585E-04   .7639563E-05   .5385183E-04   .7725785E-04   .5648180E-04
  -.1788134E-04  -.4210958E-04   .3122489E-04   .3898319E-04  -.2497687E-04
  -.6635246E-04  -.1815428E-04   .1757572E-04   .4685118E-04   .1074459E-03
   .1277060E-03   .4872939E-04  -.4852731E-04  -.7431016E-04  -.5334869E-04
  -.4362226E-04  -.4089358E-04  -.1927161E-04  -.3953877E-04  -.1042730E-03
  -.5020930E-04   .9083597E-04   .1321805E-03   .7241396E-04   .2387950E-04
   .3447801E-04   .4821371E-04   .4836516E-04   .3257838E-04  -.6509578E-05
  -.4795393E-04  -.1468098E-04   .9343372E-05   .4818571E-05  -.1625879E-04
  -.9695338E-04  -.1164344E-03  -.2656544E-05   .4210915E-04  -.6869909E-04
  -.9846227E-04   .2621419E-04   .9880499E-04   .2777506E-04  -.1466775E-04
   .4657611E-04   .9176743E-04   .6118946E-04   .4138750E-04   .2590001E-04
  -.7387902E-05  -.3411076E-04  -.7794839E-04  -.4013406E-04   .5587645E-04
   .6908782E-04   .2470528E-04   .7173601E-05   .2172862E-04   .2726292E-04
   .3445368E-04   .2804523E-04  -.3860060E-04  -.3771702E-04  -.3002529E-04
  -.3631179E-04  -.4426288E-05   .5059219E-04   .9230339E-04   .5342939E-04
   .2909889E-04   .4446943E-04   .7551989E-04   .6677115E-04  -.2308946E-04
  -.6659978E-04   .1358310E-05   .8428230E-04   .1154676E-03   .9661824E-04
  -.1417682E-04  -.9754546E-04  -.2841408E-04   .7686788E-04   .7656704E-04
   .2361842E-04   .2083328E-04   .6046673E-04   .6116427E-04   .2816164E-04
   .2709116E-04   .5867509E-04   .6703696E-04   .6789340E-04   .9570075E-04
   .9168581E-04  -.1243156E-04  -.3543873E-04   .1468753E-04   .5235313E-04
  -.1054381E-04  -.1284115E-03  -.7455466E-04   .6914648E-04   .1090626E-03
   .9624469E-04   .6245066E-04   .2879027E-04   .2149533E-04   .5359269E-04
   .1551778E-03   .1970441E-03   .8203777E-04   .2718897E-04   .1003890E-03
   .1350400E-03   .7952372E-04   .7893586E-05   .2134304E-04   .5862147E-04
   .7940844E-04   .6191005E-04  -.1761812E-04  -.1607219E-04   .9267259E-04
   .1280614E-03   .5741410E-04  -.4504796E-05  -.9234796E-05   .3861814E-04
   .6550105E-04   .6447759E-04   .4315633E-04   .3120504E-04   .6934424E-04
   .1267219E-03   .8746589E-04  -.4600332E-04  -.2070968E-04   .9270758E-04
   .4301248E-04  -.2926060E-04  -.6648799E-06   .2529625E-04  -.5156032E-04
  -.1106366E-03   .2660185E-04   .1533707E-03   .8497603E-04   .7131612E-05
  -.4939711E-05   .1442342E-04   .4799071E-04   .1059545E-03   .1036078E-03
   .3003917E-04   .1074862E-04   .1326325E-04   .1524624E-04   .2490650E-04
   .3280602E-04   .1398648E-04  -.2017535E-04   .5077140E-04   .1051614E-03
   .5798950E-04   .3684623E-04   .1859094E-04   .6989804E-04   .1461007E-03
   .1169450E-03   .3585357E-05  -.5029114E-04  -.2634710E-05   .4369417E-04
   .5730400E-04   .9830066E-04   .1175536E-03   .9808700E-04   .7279164E-04
   .5398494E-04   .5568577E-04   .5946125E-04   .3569573E-04  -.3241349E-04
   .1452455E-04   .5794859E-04  -.3080869E-05  -.1818568E-04  -.3436565E-04
  -.8343021E-04  -.9642076E-04  -.4387499E-04   .2487652E-04   .4061319E-04
   .4752025E-05   .1245951E-04   .6546374E-04   .7940460E-04   .7658047E-04
   .9101345E-04   .8325372E-04   .2454710E-04   .8026034E-05   .6792563E-04
   .1020160E-03   .7272008E-04   .5442391E-04   .5071959E-04   .1983405E-04
  -.2667703E-04   .2039287E-04   .8627401E-04   .3597824E-04  -.2923303E-04
  -.3074043E-04  -.5297490E-04  -.1221019E-04   .9979247E-04   .9907744E-04
   .7689154E-06  -.6127987E-04  -.3896636E-04   .5725118E-04   .7730439E-04
   .6377779E-04   .8695839E-04   .9197608E-04   .7013449E-05  -.9387556E-04
  -.4719928E-04   .3252137E-04   .1201381E-04   .1208969E-04   .8340800E-05
  -.3347893E-04  -.2049835E-04   .1160498E-04   .3591202E-04   .1900853E-04
  -.4152051E-04  -.1065430E-04   .4726928E-04   .6720541E-04   .3443949E-04
   .2629764E-04   .8117003E-04   .1041610E-03   .4303973E-04   .9443903E-05
   .3572944E-04   .6503198E-04   .8377787E-04   .6045327E-04   .1244305E-04
   .5170310E-05   .1430709E-04   .3873746E-04   .8925056E-04   .1011243E-03
   .5735174E-04   .7721169E-04   .7317766E-04   .1353652E-05   .1478073E-04
   .6848327E-04   .6592942E-04   .5207218E-04   .6323965E-04   .4256049E-04
   .2296477E-04   .5610579E-04   .1248847E-03   .1526262E-03   .1192895E-03
   .8799514E-05  -.5533752E-04  -.3117775E-04   .6486453E-05   .2637900E-04
   .1040179E-04  -.1526458E-04  -.9352271E-05   .6220751E-05  -.5506504E-04
  -.8460428E-04  -.2818494E-04  -.2295376E-04  -.6052901E-05   .4828345E-04
   .6372276E-04   .1006700E-04  -.4072893E-04   .1396920E-05   .5886125E-04
   .2503759E-04  -.2710518E-04   .3848202E-04   .1332042E-03   .1268880E-03
   .5074255E-04   .5578343E-04   .1175484E-03   .1292078E-03   .6207156E-04
  -.2189506E-04   .5121011E-05   .8491418E-04   .6173597E-04   .5745522E-05
   .7380688E-04   .1704888E-03   .7657856E-04  -.3621356E-04  -.2845794E-06
   .8249342E-04   .8526553E-04  -.1807831E-04  -.1234090E-04   .1151661E-03
   .1363031E-03   .6303710E-04   .3267652E-04   .6030043E-04   .1230122E-03
   .1824240E-03   .1392232E-03   .9582178E-04   .1295736E-03   .1419408E-03
   .5473216E-04  -.4271651E-04   .3646150E-04   .1526620E-03   .1220383E-03
   .9675515E-05  -.1134791E-04  -.2184663E-04   .5926928E-05   .8230622E-04
   .9527590E-04   .6582132E-04   .8161845E-04   .1183458E-03   .1248393E-03
   .1058254E-03   .6014317E-04   .2208530E-04   .5391689E-04   .7263887E-04
   .2165077E-04  -.5657933E-05   .6312103E-04   .1139625E-03   .4178763E-04
  -.5722627E-04  -.2769256E-04   .1033109E-03   .1118077E-03  -.4816119E-05
  -.1220724E-04   .7347975E-04   .8107490E-04   .4953365E-04  -.1775920E-04
  -.3195218E-04   .9079515E-04   .9931473E-04  -.2509146E-04  -.5653469E-04
   .4506438E-04   .1550336E-03   .1444956E-03   .3300331E-04  -.1427754E-04
   .4746245E-04   .4877289E-04  -.2352290E-04  -.5909690E-05   .2601095E-04
  -.4969696E-04  -.5411337E-04   .2816294E-04   .8069159E-04   .1133344E-04
  -.5875928E-04  -.1410145E-05   .7769826E-04   .8314452E-04   .6659406E-04
   .9460210E-04   .1291384E-03   .1315633E-03   .1043302E-03   .2796917E-04
  -.3552266E-04  -.1290822E-04   .5621686E-05   .2888591E-04   .5106740E-04
   .5616162E-04   .1021103E-03   .1127813E-03   .6056115E-04   .1725904E-04
   .1463519E-04   .1136899E-04   .4403164E-04   .4815095E-04   .2354565E-04
   .8119524E-04   .1388451E-03   .7930084E-04   .5013224E-04   .3806304E-04
   .6692050E-04   .1299655E-03   .1707343E-03   .1255715E-03   .2939464E-05
  -.3887967E-04   .2906660E-04   .9040140E-04   .9030825E-04  -.1069155E-05
  -.4277650E-04   .5958911E-04   .9978706E-04   .5515029E-04   .5120574E-04
   .7724181E-04   .2310674E-04  -.2085753E-04   .2550712E-04   .7813060E-04
   .5978457E-04   .2596586E-05   .4686970E-04   .1149082E-03   .6751925E-04
  -.2115067E-05   .3842930E-04   .1451576E-03   .1623799E-03   .8022940E-04
  -.2302929E-04  -.1112395E-03  -.5004462E-04   .1132035E-03   .1480418E-03
   .5393541E-04  -.2517131E-04  -.9711157E-05   .1006699E-04   .1487402E-04
  -.1234454E-05   .3156596E-04   .9161851E-04   .8165184E-04   .7346685E-04
   .7999812E-04   .7290980E-04   .5563015E-04   .2243140E-04   .8926179E-05
   .3213503E-04   .5079534E-04   .6496668E-04   .2558685E-04   .2854314E-04
   .8352192E-04   .8337923E-04   .7595450E-04   .8983830E-04   .8761298E-04
   .1786377E-04  -.2196259E-04   .5105969E-04   .1222672E-03   .3435317E-04
  -.8276513E-05   .7898896E-04   .1008143E-03  -.3894434E-05  -.6566441E-04
   .2527620E-04   .1783305E-03   .2289697E-03   .1065923E-03   .2658079E-04
   .4894850E-04   .1023323E-04  -.2689510E-04  -.5940718E-04  -.6498500E-04
  -.1887540E-04   .2813641E-04   .5772037E-04   .8182204E-04   .9616975E-04
   .7120684E-04   .8208372E-04   .1289625E-03   .1182083E-03   .3306508E-04
   .6105513E-04   .1993803E-03   .2300355E-03   .1139493E-03   .6683144E-04
   .1844872E-03   .2018723E-03   .7169418E-04   .4945723E-04   .1537725E-03
   .2056581E-03   .1352695E-03   .3002904E-04   .2194450E-04   .1059009E-03
   .1626230E-03   .1117966E-03   .4348580E-04   .5461299E-04   .1402298E-03
   .1791303E-03   .1143354E-03   .8442917E-04   .1346971E-03   .1502386E-03
   .1249895E-03   .1403136E-03   .1654534E-03   .1401120E-03   .1010588E-03
   .1071061E-03   .1081533E-03  -.2066754E-05  -.1380799E-04   .1112270E-03
   .6754067E-04  -.6203658E-04  -.5465151E-04  -.8917559E-05   .3206980E-04
   .7055875E-04   .4704398E-04   .2243104E-04   .3860458E-04   .4618815E-04
   .1983809E-04   .1953673E-04   .5399642E-04   .9740399E-04   .9991651E-04
   .3034143E-04  -.1233154E-04   .6233143E-04   .1481433E-03   .1037939E-03
  -.1310821E-04  -.5717185E-04   .2843479E-04   .8827390E-04   .7170865E-04
   .7455424E-04   .9919750E-04   .5097994E-04  -.4742294E-04  -.1020023E-04
   .7290775E-04   .7376873E-04   .4837329E-04   .6938712E-04   .5536373E-04
   .3292383E-05   .2542943E-04  -.1336886E-05  -.5151012E-05   .5749189E-04
   .4816895E-04  -.5340241E-05   .8174847E-05   .5079829E-04   .6166347E-04
   .3714348E-04   .2832399E-04   .5991885E-04   .1299290E-04   .9347180E-05
   .5762083E-04   .7451116E-04   .8768998E-04   .9836701E-04   .7234673E-04
   .4091461E-04   .3764759E-04   .5429105E-04   .9008204E-04   .8693762E-04
   .5947534E-05  -.1605785E-04   .5313799E-04   .1272620E-03   .1171498E-03
   .1126930E-03   .9213570E-04   .1578329E-04  -.2017171E-04  -.6083928E-04
  -.3443113E-05   .1076992E-03   .1265298E-03   .6600087E-04   .2498674E-04
   .4413691E-04   .7145098E-04   .4844335E-04   .4595386E-04   .6006151E-04
   .3257545E-04  -.1062149E-04   .6762072E-04   .1440939E-03   .2957672E-04
  -.8169184E-04  -.2178415E-05   .8613845E-04   .7655805E-04   .6108439E-04
   .7278757E-04   .1177256E-03   .1212696E-03   .7238643E-04   .7256522E-04
   .1296099E-03   .1259207E-03   .7676460E-04   .6690738E-04   .7871132E-05
  -.3543515E-04   .3895544E-04   .9768564E-04   .5297935E-04   .2179525E-04
   .2486288E-04   .3623204E-04  -.1258243E-04  -.3746531E-04   .4426320E-04
   .9243497E-04  -.5944645E-05  -.9329527E-04  -.1175132E-04   .1117523E-03
   .8829508E-04   .3871676E-04   .3820744E-04   .4491660E-04   .2174813E-04
  -.3042222E-04  -.2468146E-04   .4926733E-05   .2864392E-04   .2160065E-04
  -.1583613E-04   .9415954E-05   .3122022E-04   .3573361E-04   .8038110E-04
   .1466202E-03   .1573315E-03   .8022979E-04   .2757930E-04   .4425965E-04
   .4237941E-04   .5380540E-04   .1010424E-03   .1136413E-03   .9817059E-05
  -.7637287E-04  -.8972952E-04  -.4826167E-04   .7011766E-04   .1387343E-03
   .1053407E-03   .3442857E-04  -.1196269E-04   .5920502E-05   .3778631E-04
   .5252562E-04   .4859424E-04  -.7287656E-05  -.2632982E-04  -.1254166E-04
  -.1701450E-04  -.1977771E-04   .1971279E-04   .7551062E-04   .5291674E-04
  -.3061783E-04  -.1992109E-04   .7617811E-04   .1057358E-03   .3136376E-04
   .2193787E-05   .5799664E-04   .5738563E-04  -.2539997E-04  -.5829976E-05
   .1532610E-03   .2303225E-03   .1071542E-03  -.2253215E-04   .2686460E-04
   .1311957E-03   .1020037E-03   .3755836E-04   .7975758E-04   .1149464E-03
   .7345491E-04   .2900894E-04  -.1543774E-04   .2931311E-04   .1155124E-03
   .9464759E-04   .1354155E-04  -.2639833E-04   .7260990E-06   .2750102E-04
  -.5451324E-05  -.2427847E-04   .2951130E-04   .7123169E-04   .6894790E-04
   .5305618E-04   .3777669E-04  -.7856600E-06   .7262763E-04   .1949734E-03
   .8715753E-04  -.1005155E-03  -.7610953E-04  -.2008004E-04  -.6944566E-04
  -.1048336E-03  -.7361871E-04  -.4986765E-04  -.7145278E-04  -.1290630E-03
  -.1210396E-03  -.9001915E-04  -.6469490E-04  -.7087567E-04  -.1404465E-03
  -.2337796E-03  -.3308415E-03  -.5000951E-03  -.6475878E-03  -.7808019E-03
  -.8402861E-03  -.7212760E-03  -.5570411E-03  -.4702947E-03  -.2407328E-03
   .2006180E-03   .6365561E-03   .9558034E-03   .1225702E-02   .1401852E-02
   .1402804E-02   .1215300E-02   .9378026E-03   .6692560E-03   .2861299E-03
  -.2668739E-03  -.8384957E-03  -.1156823E-02  -.1223137E-02  -.1198721E-02
  -.1144203E-02  -.9611311E-03  -.7356002E-03  -.5316703E-03  -.2856016E-03
   .3435216E-04   .3385591E-03   .5765299E-03   .7814517E-03   .9031479E-03
   .8598853E-03   .6960149E-03   .4090843E-03   .2902176E-04  -.3601456E-03
  -.6856409E-03  -.8836200E-03  -.9656137E-03  -.8732390E-03  -.6044115E-03
  -.2069153E-03   .3422068E-03   .9796271E-03   .1464486E-02   .1636437E-02
   .1574303E-02   .1402634E-02   .1166430E-02   .8064934E-03   .3764294E-03
   .5981612E-04  -.5552923E-04  -.2547003E-04   .4314664E-04   .1626595E-03
   .3390946E-03   .4952466E-03   .6227840E-03   .7984070E-03   .1005415E-02
   .1190455E-02   .1312447E-02   .1238147E-02   .8206100E-03   .7757337E-04
  -.6304909E-03  -.9844375E-03  -.1066514E-02  -.1012904E-02  -.8922198E-03
  -.8113158E-03  -.7469099E-03  -.6868001E-03  -.4964676E-03  -.5432809E-04
   .4547146E-03   .8123130E-03   .1039171E-02   .1036883E-02   .5475486E-03
  -.1941031E-03  -.7937096E-03  -.1074522E-02  -.1075019E-02  -.9385500E-03
  -.8214906E-03  -.8492048E-03  -.9349667E-03  -.9258092E-03  -.8041295E-03
  -.6040672E-03  -.3902648E-03  -.2980603E-03  -.4420182E-03  -.7287402E-03
  -.1073891E-02  -.1241089E-02  -.1118606E-02  -.9192299E-03  -.8819334E-03
  -.8635301E-03  -.6536847E-03  -.2233068E-03   .3851799E-03   .1020194E-02
   .1708887E-02   .2464361E-02   .3018913E-02   .3258381E-02   .3316054E-02
   .3265647E-02   .3110987E-02   .2685234E-02   .1889656E-02   .7421167E-03
  -.5367090E-03  -.1616425E-02  -.2378592E-02  -.2920119E-02  -.3301650E-02
  -.3467264E-02  -.3521062E-02  -.3388150E-02  -.2965448E-02  -.2328634E-02
  -.1516443E-02  -.6537713E-03  -.5406725E-04   .1500290E-03   .4162122E-04
  -.1088915E-03  -.1449303E-04   .3409931E-03   .7477739E-03   .1085135E-02
   .1411074E-02   .1690224E-02   .1832641E-02   .1845079E-02   .1705514E-02
   .1384027E-02   .1052123E-02   .7437404E-03   .2902575E-03  -.3408213E-03
  -.9926624E-03  -.1489126E-02  -.1754902E-02  -.1701438E-02  -.1394151E-02
  -.1064270E-02  -.9349055E-03  -.8418980E-03  -.4712024E-03   .2138021E-03
   .9593086E-03   .1560330E-02   .1983617E-02   .2234081E-02   .2256947E-02
   .2114936E-02   .1833520E-02   .1347893E-02   .8300987E-03   .4919433E-03
   .2660322E-03   .7977039E-04  -.4386695E-04  -.6475528E-04   .1290192E-03
   .4521944E-03   .6657249E-03   .6328064E-03   .5091751E-03   .3826601E-03
   .2945052E-03   .1928899E-03   .7474502E-04   .1805758E-03   .3911195E-03
   .4268812E-03   .3637523E-03   .2601254E-03   .8659153E-04  -.9967860E-04
  -.1942377E-03  -.1127381E-03   .1498342E-03   .4938435E-03   .9421103E-03
   .1312446E-02   .1419175E-02   .1346049E-02   .1215995E-02   .1003631E-02
   .6353447E-03   .2669751E-03  -.1626068E-04  -.3952495E-03  -.8958332E-03
  -.1278688E-02  -.1442914E-02  -.1434346E-02  -.1337017E-02  -.1123181E-02
  -.8347534E-03  -.5450748E-03  -.2512285E-03   .1508110E-04   .2502407E-03
   .4178179E-03   .4554446E-03   .3541687E-03   .2363563E-03   .9695894E-04
  -.1498941E-03  -.4470679E-03  -.7554549E-03  -.1121100E-02  -.1590938E-02
  -.2160953E-02  -.2638936E-02  -.2990746E-02  -.3223287E-02  -.3224192E-02
  -.2892127E-02  -.2335731E-02  -.1748232E-02  -.9937817E-03   .1667695E-04
   .9408950E-03   .1613022E-02   .1962983E-02   .1857996E-02   .1331301E-02
   .5671032E-03  -.8932925E-04  -.5047653E-03  -.7009655E-03  -.7498573E-03
  -.4500527E-03   .2623946E-03   .9955169E-03   .1413396E-02   .1553588E-02
   .1569319E-02   .1466475E-02   .1180966E-02   .7762572E-03   .4043193E-03
   .3529692E-04  -.3081266E-03  -.5346304E-03  -.5574129E-03  -.2226661E-03
   .2850921E-03   .6564788E-03   .1015593E-02   .1613145E-02   .2207671E-02
   .2417302E-02   .2245924E-02   .1853564E-02   .1250664E-02   .5570054E-03
  -.9894360E-04  -.7505314E-03  -.1377126E-02  -.1898830E-02  -.2300159E-02
  -.2418028E-02  -.2084079E-02  -.1640659E-02  -.1397905E-02  -.1227413E-02
  -.1171123E-02  -.1355924E-02  -.1644676E-02  -.1876460E-02  -.2015860E-02
  -.2117447E-02  -.2003511E-02  -.1653632E-02  -.1231725E-02  -.7033066E-03
  -.1429185E-04   .6429543E-03   .1128641E-02   .1568819E-02   .1920781E-02
   .2102661E-02   .1999078E-02   .1597426E-02   .1113553E-02   .7511213E-03
   .5299145E-03   .3695911E-03   .2271161E-03   .2640314E-03   .5012451E-03
   .7831432E-03   .1098327E-02   .1408515E-02   .1581614E-02   .1667731E-02
   .1940309E-02   .2447847E-02   .2950554E-02   .3315406E-02   .3537493E-02
   .3626283E-02   .3532707E-02   .3206360E-02   .2669760E-02   .1946376E-02
   .1235711E-02   .6004299E-03  -.1115237E-03  -.7923217E-03  -.1303705E-02
  -.1867873E-02  -.2585130E-02  -.3321694E-02  -.3786552E-02  -.3687033E-02
  -.3116105E-02  -.2311292E-02  -.1374291E-02  -.4824038E-03   .2014767E-03
   .6412832E-03   .8917962E-03   .1065546E-02   .1234859E-02   .1282232E-02
   .1057104E-02   .5105194E-03  -.3006870E-03  -.1274436E-02  -.2348115E-02
  -.3259911E-02  -.3681682E-02  -.3615719E-02  -.3437269E-02  -.3329340E-02
  -.3208166E-02  -.3247310E-02  -.3645198E-02  -.4234405E-02  -.4618685E-02
  -.4401002E-02  -.3684039E-02  -.2876103E-02  -.2161358E-02  -.1358466E-02
  -.3835278E-03   .5960821E-03   .1437853E-02   .2117221E-02   .2709813E-02
   .3295694E-02   .3819556E-02   .4281243E-02   .4732033E-02   .4986008E-02
   .4868402E-02   .4401380E-02   .3605247E-02   .2586375E-02   .1495358E-02
   .4669248E-03  -.2691789E-03  -.5881930E-03  -.6421576E-03  -.7075921E-03
  -.7475011E-03  -.5706773E-03  -.1442661E-03   .3315284E-03   .5925277E-03
   .5821745E-03   .5226955E-03   .5253356E-03   .6603008E-03   .9036320E-03
   .1130942E-02   .1374029E-02   .1785891E-02   .2319763E-02   .2875932E-02
   .3498356E-02   .4115891E-02   .4497109E-02   .4528111E-02   .4199835E-02
   .3554997E-02   .2597505E-02   .1425135E-02   .1397125E-03  -.1215512E-02
  -.2453725E-02  -.3183054E-02  -.3278868E-02  -.3104921E-02  -.2973733E-02
  -.2943017E-02  -.3011731E-02  -.3268286E-02  -.3719901E-02  -.4244905E-02
  -.4704451E-02  -.5061498E-02  -.5310743E-02  -.5153141E-02  -.4358044E-02
  -.3249453E-02  -.2278910E-02  -.1558918E-02  -.9671760E-03  -.3534051E-03
   .2913001E-03   .8705423E-03   .1160289E-02   .8148561E-03  -.1819132E-03
  -.1422738E-02  -.2492979E-02  -.3011072E-02  -.2936086E-02  -.2548696E-02
  -.2171905E-02  -.1756090E-02  -.1036895E-02   .6739325E-04   .1283934E-02
   .2308686E-02   .2884230E-02   .3002573E-02   .2984024E-02   .3139300E-02
   .3695436E-02   .4530255E-02   .5193580E-02   .5415616E-02   .5117237E-02
   .4329365E-02   .3191117E-02   .1945988E-02   .9406197E-03   .3059139E-03
  -.5733201E-04  -.1335813E-03  -.4158175E-04  -.3115068E-03  -.1193487E-02
  -.2263367E-02  -.2706865E-02  -.2186145E-02  -.1026330E-02   .1673833E-03
   .9239737E-03   .1234675E-02   .1273272E-02   .1157222E-02   .1097108E-02
   .1313681E-02   .1733238E-02   .1985766E-02   .1927556E-02   .1684635E-02
   .1336804E-02   .1023321E-02   .7086685E-03   .4009359E-03   .1929668E-03
  -.8307345E-05  -.2810176E-03  -.8251433E-03  -.1762283E-02  -.2814634E-02
  -.3565774E-02  -.3792418E-02  -.3460105E-02  -.2886850E-02  -.2410486E-02
  -.2174350E-02  -.2235058E-02  -.2508810E-02  -.2838279E-02  -.2949651E-02
  -.2630212E-02  -.1935795E-02  -.1021875E-02   .3885709E-04   .1083696E-02
   .1893661E-02   .2238438E-02   .2131394E-02   .1758300E-02   .1205777E-02
   .7623366E-03   .7577892E-03   .1264193E-02   .2176326E-02   .3378926E-02
   .4779673E-02   .6228584E-02   .7230786E-02   .7370976E-02   .6945849E-02
   .6528220E-02   .6222672E-02   .5738114E-02   .4804266E-02   .3552152E-02
   .2321032E-02   .1269578E-02   .2542525E-03  -.9995309E-03  -.2665608E-02
  -.4629608E-02  -.6440197E-02  -.7448904E-02  -.7537279E-02  -.7544801E-02
  -.8133758E-02  -.8684666E-02  -.8204001E-02  -.6726520E-02  -.5003467E-02
  -.3445866E-02  -.2007485E-02  -.5224623E-03   .8517544E-03   .1990761E-02
   .3054036E-02   .4012396E-02   .4565462E-02   .4468398E-02   .3629003E-02
   .2242294E-02   .7019837E-03  -.8444528E-03  -.2416582E-02  -.3881734E-02
  -.4836269E-02  -.4746473E-02  -.3652174E-02  -.2056951E-02  -.4318484E-03
   .9190764E-03   .2004808E-02   .2861655E-02   .3299901E-02   .3124277E-02
   .2302904E-02   .9560833E-03  -.6822267E-03  -.2197371E-02  -.3188551E-02
  -.3566328E-02  -.3516567E-02  -.3245405E-02  -.2819504E-02  -.2115738E-02
  -.1027792E-02   .2681813E-03   .1404407E-02   .2046795E-02   .2102603E-02
   .1882743E-02   .1766983E-02   .1900605E-02   .2207964E-02   .2622467E-02
   .3116625E-02   .3609378E-02   .4184615E-02   .4696214E-02   .4721329E-02
   .4088413E-02   .2837981E-02   .1067797E-02  -.1045784E-02  -.3072669E-02
  -.4472729E-02  -.5014454E-02  -.4711229E-02  -.3519170E-02  -.1561266E-02
   .5055019E-03   .1825667E-02   .2157283E-02   .1993361E-02   .1896903E-02
   .1950955E-02   .1827532E-02   .1336204E-02   .6294335E-03   .6613796E-05
  -.4733009E-03  -.8135351E-03  -.9421247E-03  -.9130175E-03  -.5865445E-03
   .3364654E-03   .1799329E-02   .3466682E-02   .5053069E-02   .6404220E-02
   .7406300E-02   .7905883E-02   .8148989E-02   .8355603E-02   .8301224E-02
   .7748114E-02   .6701005E-02   .5404815E-02   .4116345E-02   .2866887E-02
   .1672854E-02   .6127499E-03  -.3364617E-03  -.1265301E-02  -.2235588E-02
  -.3168647E-02  -.3989569E-02  -.4776346E-02  -.5474046E-02  -.5919632E-02
  -.6115726E-02  -.6056675E-02  -.5753455E-02  -.5172702E-02  -.4404744E-02
  -.3817609E-02  -.3620491E-02  -.3558089E-02  -.3382130E-02  -.3184545E-02
  -.2890511E-02  -.2219143E-02  -.1150741E-02   .6940149E-04   .1112631E-02
   .1687641E-02   .1743601E-02   .1324843E-02   .5082996E-03  -.3119144E-03
  -.9344902E-03  -.1317371E-02  -.1526206E-02  -.1924850E-02  -.2545469E-02
  -.3067193E-02  -.3257351E-02  -.3015337E-02  -.2614421E-02  -.2368217E-02
  -.2223222E-02  -.1747563E-02  -.8101544E-03   .7689193E-04   .6146315E-03
   .9874851E-03   .1423447E-02   .1830401E-02   .1749704E-02   .1008951E-02
   .1117068E-04  -.7133734E-03  -.7407489E-03  -.2417958E-04   .1191199E-02
   .2396547E-02   .3049733E-02   .3040642E-02   .2622566E-02   .1903674E-02
   .9744993E-03  -.5137476E-04  -.1073037E-02  -.1924461E-02  -.2416703E-02
  -.2520328E-02  -.2302807E-02  -.1810291E-02  -.1086562E-02   .1107548E-04
   .1507480E-02   .3137809E-02   .4581447E-02   .5372488E-02   .5489587E-02
   .5483162E-02   .5795307E-02   .6333511E-02   .6545491E-02   .6041061E-02
   .4900584E-02   .3333962E-02   .1699567E-02   .6498529E-03   .5618829E-03
   .1214287E-02   .2084938E-02   .2972943E-02   .3895370E-02   .4584469E-02
   .4488943E-02   .3416013E-02   .1771786E-02   .5157097E-04  -.1418805E-02
  -.2344026E-02  -.2416546E-02  -.1698013E-02  -.9072481E-03  -.7774504E-03
  -.1213957E-02  -.1544833E-02  -.1425053E-02  -.9902362E-03  -.3786710E-03
   .3131720E-03   .9607697E-03   .1281239E-02   .1265051E-02   .1329247E-02
   .1839426E-02   .2531785E-02   .2647571E-02   .1651473E-02  -.1737566E-03
  -.2285180E-02  -.4222130E-02  -.5706554E-02  -.6745329E-02  -.7605076E-02
  -.8380729E-02  -.8743485E-02  -.8567797E-02  -.8139085E-02  -.7917604E-02
  -.7936926E-02  -.7910356E-02  -.7680235E-02  -.7094101E-02  -.6013429E-02
  -.4354252E-02  -.2076575E-02   .6268128E-03   .3168045E-02   .4947960E-02
   .5821422E-02   .6153029E-02   .6273762E-02   .6274722E-02   .6232226E-02
   .6213529E-02   .6118093E-02   .5735126E-02   .5072097E-02   .4120948E-02
   .2868722E-02   .1374615E-02  -.4514452E-03  -.2468668E-02  -.4277358E-02
  -.5737621E-02  -.7030699E-02  -.8130607E-02  -.8758036E-02  -.8858664E-02
  -.8643311E-02  -.8284619E-02  -.7802821E-02  -.7245205E-02  -.6662768E-02
  -.6067919E-02  -.5396209E-02  -.4577294E-02  -.3505460E-02  -.2179605E-02
  -.7432074E-03   .6870439E-03   .1960253E-02   .3004694E-02   .3675756E-02
   .3943701E-02   .4117006E-02   .4397650E-02   .4753034E-02   .5200752E-02
   .5808926E-02   .6367261E-02   .6466659E-02   .5853412E-02   .4772791E-02
   .3713863E-02   .2963686E-02   .2375343E-02   .1749520E-02   .1295885E-02
   .1280117E-02   .1674350E-02   .2163300E-02   .2281961E-02   .1829960E-02
   .1034048E-02   .3471190E-03   .6201069E-04   .9413701E-04   .2403359E-03
   .4800645E-03   .9362168E-03   .1584434E-02   .2220459E-02   .2725743E-02
   .3166880E-02   .3497533E-02   .3497651E-02   .3015408E-02   .2010291E-02
   .6872378E-03  -.6074178E-03  -.1456254E-02  -.1549986E-02  -.1275637E-02
  -.1431679E-02  -.2425129E-02  -.4022525E-02  -.5855812E-02  -.7453411E-02
  -.8140688E-02  -.7672817E-02  -.6448340E-02  -.5144701E-02  -.4273027E-02
  -.3824783E-02  -.3453795E-02  -.2885078E-02  -.2075774E-02  -.1047895E-02
   .7957562E-04   .1130604E-02   .1991823E-02   .2653747E-02   .3129535E-02
   .3272184E-02   .2932186E-02   .2251186E-02   .1469906E-02   .6982961E-03
  -.2260842E-04  -.7205969E-03  -.1359075E-02  -.1834523E-02  -.2175500E-02
  -.2286478E-02  -.1977665E-02  -.1265096E-02  -.3219304E-03   .7815511E-03
   .1906051E-02   .2807186E-02   .3136747E-02   .2490311E-02   .9980872E-03
  -.4948345E-03  -.1125158E-02  -.6791231E-03   .2447821E-03   .9168736E-03
   .1232503E-02   .1550882E-02   .2127031E-02   .2748701E-02   .3067609E-02
   .3023449E-02   .3027155E-02   .3501012E-02   .4397733E-02   .5411767E-02
   .6077799E-02   .6060138E-02   .5379410E-02   .4222084E-02   .2849735E-02
   .1532768E-02   .3471377E-03  -.8648897E-03  -.2272417E-02  -.3811102E-02
  -.5410876E-02  -.6876275E-02  -.7748555E-02  -.7781529E-02  -.7169345E-02
  -.6337320E-02  -.5665658E-02  -.5567879E-02  -.6027608E-02  -.6366658E-02
  -.5983810E-02  -.4783672E-02  -.2923892E-02  -.1099234E-02   .6354509E-04
   .6437015E-03   .1010929E-02   .1343797E-02   .1536485E-02   .1535118E-02
   .1211752E-02   .4128233E-03  -.6908812E-03  -.1665539E-02  -.2270022E-02
  -.2702534E-02  -.3051274E-02  -.3139153E-02  -.2945838E-02  -.2808487E-02
  -.3174837E-02  -.4005010E-02  -.4844224E-02  -.5402127E-02  -.5693937E-02
  -.5746602E-02  -.5658961E-02  -.5588767E-02  -.5660461E-02  -.5981887E-02
  -.6525507E-02  -.6963737E-02  -.6743501E-02  -.5462469E-02  -.3235660E-02
  -.5301137E-03   .2198406E-02   .4603142E-02   .6263663E-02   .7136773E-02
   .7943130E-02   .9286991E-02   .1098324E-01   .1252414E-01   .1365501E-01
   .1425597E-01   .1394231E-01   .1246901E-01   .1006180E-01   .7372674E-02
   .4867429E-02   .2716506E-02   .9945003E-03  -.2399487E-03  -.9592158E-03
  -.1650358E-02  -.2643450E-02  -.3733368E-02  -.4440008E-02  -.4449512E-02
  -.3842125E-02  -.3075758E-02  -.2645465E-02  -.2593995E-02  -.2644775E-02
  -.2823608E-02  -.3070027E-02  -.3229289E-02  -.3130780E-02  -.2692962E-02
  -.2122345E-02  -.1844561E-02  -.2142140E-02  -.2947452E-02  -.3954769E-02
  -.4682016E-02  -.5020081E-02  -.5277523E-02  -.5573520E-02  -.5622356E-02
  -.5070654E-02  -.4092489E-02  -.3310131E-02  -.3089501E-02  -.3327743E-02
  -.3564574E-02  -.3318092E-02  -.2320752E-02  -.6727536E-03   .1275692E-02
   .3080282E-02   .4287702E-02   .4760481E-02   .4860420E-02   .5236537E-02
   .6280101E-02   .7757002E-02   .8975795E-02   .9414125E-02   .8983678E-02
   .7875440E-02   .6295695E-02   .4311708E-02   .2329173E-02   .7408444E-03
  -.5447448E-03  -.1773769E-02  -.3006391E-02  -.4179288E-02  -.5202075E-02
  -.5966320E-02  -.6199727E-02  -.5575407E-02  -.4101994E-02  -.2139076E-02
  -.2171092E-03   .1206588E-02   .1982045E-02   .2012479E-02   .1338462E-02
   .3827481E-03  -.4160066E-03  -.9434217E-03  -.1215003E-02  -.1138513E-02
  -.5469293E-03   .5652864E-03   .1824735E-02   .2919337E-02   .3697352E-02
   .4047633E-02   .4022102E-02   .3688603E-02   .2761353E-02   .1015790E-02
  -.1008449E-02  -.2509618E-02  -.3462575E-02  -.4452022E-02  -.5941862E-02
  -.7983538E-02  -.1043286E-01  -.1303360E-01  -.1539670E-01  -.1695698E-01
  -.1738549E-01  -.1682107E-01  -.1561580E-01  -.1400425E-01  -.1205046E-01
  -.9861004E-02  -.7585149E-02  -.5211374E-02  -.2612245E-02   .2126373E-03
   .3173777E-02   .6190461E-02   .8987755E-02   .1133980E-01   .1331187E-01
   .1517121E-01   .1702760E-01   .1853622E-01   .1929895E-01   .1933591E-01
   .1898999E-01   .1845083E-01   .1798616E-01   .1782881E-01   .1779449E-01
   .1737964E-01   .1614535E-01   .1405719E-01   .1133738E-01   .8278410E-02
   .5174542E-02   .2342065E-02   .2088682E-03  -.1077328E-02  -.1660338E-02
  -.1861825E-02  -.2140933E-02  -.2586514E-02  -.3060897E-02  -.3665895E-02
  -.4432647E-02  -.5183881E-02  -.5784520E-02  -.6091352E-02  -.5942510E-02
  -.5405384E-02  -.4679076E-02  -.3941320E-02  -.3154220E-02  -.2160250E-02
  -.1057728E-02  -.2651681E-03  -.9281564E-06  -.1738501E-03  -.8760793E-03
  -.2459253E-02  -.4815195E-02  -.7325566E-02  -.9661779E-02  -.1249390E-01
  -.1639297E-01  -.2046545E-01  -.2307031E-01  -.2379041E-01  -.2363950E-01
  -.2322923E-01  -.2195729E-01  -.1906780E-01  -.1494306E-01  -.1054520E-01
  -.6420457E-02  -.2624031E-02   .9659390E-03   .4385613E-02   .7612452E-02
   .1064154E-01   .1338656E-01   .1585087E-01   .1802873E-01   .1977221E-01
   .2103566E-01   .2168986E-01   .2132591E-01   .1971756E-01   .1736186E-01
   .1511633E-01   .1340170E-01   .1208150E-01   .1104665E-01   .1021631E-01
   .9320253E-02   .7757327E-02   .4934786E-02   .9865697E-03  -.3015579E-02
  -.6041432E-02  -.8112830E-02  -.9855335E-02  -.1163568E-01  -.1334753E-01
  -.1496806E-01  -.1682257E-01  -.1915768E-01  -.2184977E-01  -.2448229E-01
  -.2659278E-01  -.2785325E-01  -.2823266E-01  -.2783107E-01  -.2645601E-01
  -.2383829E-01  -.2006198E-01  -.1552423E-01  -.1085431E-01  -.6397965E-02
  -.2197084E-02   .1796712E-02   .5715789E-02   .9607223E-02   .1342608E-01
   .1697491E-01   .1995930E-01   .2224807E-01   .2384735E-01   .2473657E-01
   .2508718E-01   .2534275E-01   .2579375E-01   .2618200E-01   .2618651E-01
   .2590074E-01   .2573884E-01   .2597134E-01   .2647509E-01   .2665546E-01
   .2569991E-01   .2362313E-01   .2141579E-01   .2004465E-01   .1914386E-01
   .1756858E-01   .1555644E-01   .1441999E-01   .1440903E-01   .1419467E-01
   .1281550E-01   .1078864E-01   .8858307E-02   .6991175E-02   .4729481E-02
   .1998574E-02  -.6842319E-03  -.3058997E-02  -.5330891E-02  -.7561328E-02
  -.9931827E-02  -.1273482E-01  -.1599360E-01  -.1965713E-01  -.2370377E-01
  -.2819428E-01  -.3295446E-01  -.3728938E-01  -.4061787E-01  -.4309537E-01
  -.4531354E-01  -.4739960E-01  -.4911099E-01  -.5039057E-01  -.5125563E-01
  -.5124158E-01  -.4957845E-01  -.4613013E-01  -.4138051E-01  -.3578040E-01
  -.2966553E-01  -.2327641E-01  -.1668876E-01  -.1013020E-01  -.3598789E-02
   .3442811E-02   .1104405E-01   .1845101E-01   .2488323E-01   .3025154E-01
   .3523745E-01   .4021633E-01   .4453734E-01   .4730993E-01   .4837082E-01
   .4799547E-01   .4632495E-01   .4363887E-01   .4043117E-01   .3707088E-01
   .3347818E-01   .2950330E-01   .2532337E-01   .2097335E-01   .1620323E-01
   .1119085E-01   .6677610E-02   .3224139E-02   .5959419E-03  -.1855405E-02
  -.4392660E-02  -.6728006E-02  -.8581849E-02  -.1019953E-01  -.1215564E-01
  -.1462550E-01  -.1740429E-01  -.1998194E-01  -.2171293E-01  -.2218436E-01
  -.2153843E-01  -.2030774E-01  -.1876387E-01  -.1639559E-01  -.1233342E-01
  -.6396001E-02   .5780447E-03   .7847664E-02   .1559131E-01   .2371407E-01
   .3070532E-01   .3503240E-01   .3658190E-01   .3634413E-01   .3501285E-01
   .3236674E-01   .2811685E-01   .2264098E-01   .1679555E-01   .1137198E-01
   .6647583E-02   .2433174E-02  -.1559493E-02  -.5411181E-02  -.9025771E-02
  -.1235352E-01  -.1569087E-01  -.1938891E-01  -.2348345E-01  -.2757089E-01
  -.3073249E-01  -.3250459E-01  -.3326514E-01  -.3369369E-01  -.3430361E-01
  -.3504822E-01  -.3561988E-01  -.3590058E-01  -.3572464E-01  -.3467857E-01
  -.3229102E-01  -.2848783E-01  -.2338449E-01  -.1719998E-01  -.1064758E-01
  -.4761718E-02  -.1025915E-03   .3526431E-02   .6740635E-02   .9621325E-02
   .1155909E-01   .1250082E-01   .1291623E-01   .1290995E-01   .1244240E-01
   .1201254E-01   .1210586E-01   .1234440E-01   .1225153E-01   .1207535E-01
   .1235015E-01   .1301984E-01   .1371407E-01   .1437950E-01   .1516537E-01
   .1620786E-01   .1749921E-01   .1907146E-01   .2058634E-01   .2145869E-01
   .2139595E-01   .2061851E-01   .1953972E-01   .1832228E-01   .1686196E-01
   .1529028E-01   .1395992E-01   .1319715E-01   .1307501E-01   .1335045E-01
   .1391962E-01   .1480461E-01   .1560130E-01   .1574014E-01   .1505375E-01
   .1345076E-01   .1044479E-01   .5831858E-02   .5501096E-03  -.4187153E-02
  -.8257173E-02  -.1259765E-01  -.1779380E-01  -.2333419E-01  -.2841892E-01
  -.3268946E-01  -.3616247E-01  -.3861446E-01  -.3974205E-01  -.3983043E-01
  -.3927533E-01  -.3793424E-01  -.3556646E-01  -.3247250E-01  -.2939883E-01
  -.2661257E-01  -.2365606E-01  -.1999295E-01  -.1579854E-01  -.1150824E-01
  -.7075422E-02  -.2103945E-02   .3626972E-02   .9898223E-02   .1628944E-01
   .2241987E-01   .2791146E-01   .3213470E-01   .3493995E-01   .3687940E-01
   .3824605E-01   .3869165E-01   .3815013E-01   .3698353E-01   .3476381E-01
   .3082713E-01   .2579883E-01   .2079309E-01   .1567860E-01   .9812483E-02
   .3629655E-02  -.1718561E-02  -.6203800E-02  -.1089528E-01  -.1650289E-01
  -.2273823E-01  -.2868017E-01  -.3420640E-01  -.3968530E-01  -.4465716E-01
  -.4815946E-01  -.4954031E-01  -.4889131E-01  -.4633407E-01  -.4137351E-01
  -.3389634E-01  -.2513186E-01  -.1639410E-01  -.8029733E-02  -.2433737E-03
   .6058950E-02   .1019275E-01   .1297028E-01   .1592721E-01   .1932753E-01
   .2233624E-01   .2464901E-01   .2692744E-01   .2955474E-01   .3209355E-01
   .3418400E-01   .3592786E-01   .3716720E-01   .3751352E-01   .3698612E-01
   .3556972E-01   .3312899E-01   .2990982E-01   .2631201E-01   .2231344E-01
   .1764232E-01   .1232770E-01   .6345264E-02  -.5455793E-03  -.8664128E-02
  -.1789605E-01  -.2726088E-01  -.3593039E-01  -.4375757E-01  -.5083850E-01
  -.5739952E-01  -.6345544E-01  -.6882104E-01  -.7287894E-01  -.7517533E-01
  -.7609072E-01  -.7621830E-01  -.7594093E-01  -.7493340E-01  -.7227404E-01
  -.6741628E-01  -.6094023E-01  -.5425182E-01  -.4849148E-01  -.4372664E-01
  -.3900229E-01  -.3333445E-01  -.2675572E-01  -.1977460E-01  -.1265029E-01
  -.5766167E-02   .5230845E-03   .6256529E-02   .1160127E-01   .1641488E-01
   .2019445E-01   .2252565E-01   .2360832E-01   .2397137E-01   .2379512E-01
   .2315849E-01   .2231763E-01   .2128607E-01   .1993488E-01   .1821203E-01
   .1611069E-01   .1368118E-01   .1123833E-01   .9435562E-02   .8679312E-02
   .8844430E-02   .9563052E-02   .1067112E-01   .1219580E-01   .1389372E-01
   .1538884E-01   .1658405E-01   .1748899E-01   .1760405E-01   .1629555E-01
   .1350028E-01   .9513322E-02   .4399616E-02  -.1756242E-02  -.8199799E-02
  -.1372728E-01  -.1823516E-01  -.2285227E-01  -.2809230E-01  -.3280070E-01
  -.3539693E-01  -.3592276E-01  -.3570601E-01  -.3568253E-01  -.3585908E-01
  -.3605590E-01  -.3627799E-01  -.3645786E-01  -.3630593E-01  -.3545159E-01
  -.3366795E-01  -.3121539E-01  -.2861134E-01  -.2603874E-01  -.2335320E-01
  -.2034501E-01  -.1673538E-01  -.1231575E-01  -.7205071E-02  -.2031910E-02
   .2734264E-02   .7209327E-02   .1161205E-01   .1590448E-01   .1968322E-01
   .2259744E-01   .2456147E-01   .2567351E-01   .2605743E-01   .2570120E-01
   .2456546E-01   .2267587E-01   .2045294E-01   .1833209E-01   .1625642E-01
   .1396590E-01   .1146132E-01   .8730662E-02   .5057849E-02  -.5261286E-03
  -.7709562E-02  -.1525817E-01  -.2233291E-01  -.2871764E-01  -.3370633E-01
  -.3596869E-01  -.3513662E-01  -.3254311E-01  -.3003411E-01  -.2823218E-01
  -.2654608E-01  -.2426324E-01  -.2127335E-01  -.1763861E-01  -.1332140E-01
  -.8178739E-02  -.2153463E-02   .4600419E-02   .1170489E-01   .1857754E-01
   .2476148E-01   .3003361E-01   .3441304E-01   .3747907E-01   .3857305E-01
   .3780419E-01   .3627151E-01   .3521481E-01   .3486769E-01   .3479732E-01
   .3488168E-01   .3515949E-01   .3528510E-01   .3495355E-01   .3380230E-01
   .3109665E-01   .2644177E-01   .2022744E-01   .1313334E-01   .5083028E-02
  -.4254624E-02  -.1414896E-01  -.2269699E-01  -.2829126E-01  -.3078908E-01
  -.3095653E-01  -.2945567E-01  -.2666428E-01  -.2310074E-01  -.1960674E-01
  -.1685943E-01  -.1469218E-01  -.1238671E-01  -.9005444E-02  -.4082162E-02
   .2121904E-02   .9485878E-02   .1826666E-01   .2853419E-01   .3957249E-01
   .5001724E-01   .5886450E-01   .6581359E-01   .7113731E-01   .7550173E-01
   .7937910E-01   .8252340E-01   .8430302E-01   .8460965E-01   .8417361E-01
   .8351732E-01   .8225436E-01   .7980490E-01   .7621798E-01   .7220184E-01
   .6847787E-01   .6498026E-01   .6120462E-01   .5708150E-01   .5287747E-01
   .4847728E-01   .4330304E-01   .3727411E-01   .3133868E-01   .2602765E-01
   .2095650E-01   .1645520E-01   .1365653E-01   .1235354E-01   .1061925E-01
   .7164397E-02   .2598759E-02  -.1960748E-02  -.5975519E-02  -.9681031E-02
  -.1420204E-01  -.1991325E-01  -.2483520E-01  -.2628314E-01  -.2407728E-01
  -.2031994E-01  -.1632074E-01  -.1159342E-01  -.5659852E-02   .7699286E-03
   .6979424E-02   .1299222E-01   .1872822E-01   .2352796E-01   .2711321E-01
   .3002674E-01   .3258363E-01   .3433865E-01   .3487125E-01   .3443126E-01
   .3339048E-01   .3193316E-01   .3053364E-01   .2970381E-01   .2953962E-01
   .2968404E-01   .3007645E-01   .3156943E-01   .3488887E-01   .3968020E-01
   .4472188E-01   .4901535E-01   .5254793E-01   .5600565E-01   .5964631E-01
   .6231465E-01   .6291387E-01   .6268640E-01   .6317034E-01   .6272961E-01
   .5909833E-01   .5343805E-01   .4834110E-01   .4402238E-01   .3907688E-01
   .3334464E-01   .2786767E-01   .2346610E-01   .2036494E-01   .1836514E-01
   .1684558E-01   .1485474E-01   .1181392E-01   .8041217E-02   .4581966E-02
   .1985453E-02  -.3346325E-04  -.1742071E-02  -.2811251E-02  -.3276308E-02
  -.3713297E-02  -.4358109E-02  -.4801404E-02  -.4814695E-02  -.4938034E-02
  -.5605255E-02  -.6749308E-02  -.8361729E-02  -.1076560E-01  -.1407977E-01
  -.1772858E-01  -.2110247E-01  -.2443988E-01  -.2826204E-01  -.3248818E-01
  -.3672724E-01  -.4079261E-01  -.4460301E-01  -.4775755E-01  -.4977962E-01
  -.5048728E-01  -.5014962E-01  -.4935422E-01  -.4840375E-01  -.4698618E-01
  -.4488523E-01  -.4274417E-01  -.4159031E-01  -.4135583E-01  -.4077755E-01
  -.3906083E-01  -.3674733E-01  -.3463361E-01  -.3313958E-01  -.3227025E-01
  -.3218676E-01  -.3326858E-01  -.3544877E-01  -.3795273E-01  -.3976811E-01
  -.4050841E-01  -.4066614E-01  -.4102142E-01  -.4164092E-01  -.4194039E-01
  -.4162685E-01  -.4108541E-01  -.4068700E-01  -.4013240E-01  -.3897742E-01
  -.3748782E-01  -.3599432E-01  -.3387942E-01  -.3040956E-01  -.2573773E-01
  -.2087158E-01  -.1666611E-01  -.1321852E-01  -.1015580E-01  -.7147084E-02
  -.4132704E-02  -.1169314E-02   .1574827E-02   .3921982E-02   .5912764E-02
   .7587440E-02   .8780474E-02   .9039537E-02   .8028490E-02   .5787215E-02
   .2611413E-02  -.1035269E-02  -.4928546E-02  -.9306904E-02  -.1435239E-01
  -.1996990E-01  -.2627215E-01  -.3297071E-01  -.3850531E-01  -.4180731E-01
  -.4395728E-01  -.4592417E-01  -.4645380E-01  -.4374048E-01  -.3776597E-01
  -.3005017E-01  -.2149032E-01  -.1173602E-01  -.8182425E-03   .9949891E-02
   .1896457E-01   .2567291E-01   .3067796E-01   .3475630E-01   .3817163E-01
   .4093316E-01   .4297918E-01   .4408995E-01   .4435935E-01   .4454199E-01
   .4513730E-01   .4548284E-01   .4460621E-01   .4256727E-01   .4035276E-01
   .3786092E-01   .3390567E-01   .2829243E-01   .2207252E-01   .1549263E-01
   .8088687E-02   .2746335E-03  -.7043475E-02  -.1357488E-01  -.1878971E-01
  -.2101980E-01  -.2002299E-01  -.1816621E-01  -.1719621E-01  -.1591124E-01
  -.1298379E-01  -.9599855E-02  -.7109208E-02  -.4075166E-02   .1277723E-02
   .6793450E-02   .8113823E-02   .3568487E-02  -.5065933E-02  -.1565114E-01
  -.2722431E-01  -.3836160E-01  -.4706989E-01  -.5250184E-01  -.5521644E-01
  -.5596371E-01  -.5525805E-01  -.5349640E-01  -.5109503E-01  -.4869585E-01
  -.4685139E-01  -.4554668E-01  -.4440707E-01  -.4318971E-01  -.4167041E-01
  -.3954345E-01  -.3667905E-01  -.3296654E-01  -.2799864E-01  -.2116740E-01
  -.1294962E-01  -.4899636E-02   .2328760E-02   .9505370E-02   .1704319E-01
   .2372084E-01   .2802897E-01   .2970209E-01   .2923282E-01   .2665824E-01
   .2201406E-01   .1626874E-01   .1050834E-01   .4888337E-02  -.8902814E-03
  -.7000530E-02  -.1318467E-01  -.1873698E-01  -.2300471E-01  -.2633572E-01
  -.2975671E-01  -.3351557E-01  -.3665577E-01  -.3834528E-01  -.3865238E-01
  -.3833972E-01  -.3808283E-01  -.3783155E-01  -.3718957E-01  -.3678633E-01
  -.3761082E-01  -.3882375E-01  -.3871586E-01  -.3750590E-01  -.3685529E-01
  -.3719898E-01  -.3734235E-01  -.3670641E-01  -.3631483E-01  -.3676888E-01
  -.3707826E-01  -.3621076E-01  -.3493293E-01  -.3445659E-01  -.3429113E-01
  -.3293839E-01  -.3005762E-01  -.2618791E-01  -.2117082E-01  -.1474596E-01
  -.7479900E-02  -.4877235E-04   .7245523E-02   .1405748E-01   .1966728E-01
   .2361299E-01   .2644961E-01   .2916661E-01   .3191894E-01   .3385063E-01
   .3422780E-01   .3340104E-01   .3263243E-01   .3330271E-01   .3601881E-01
   .4038765E-01   .4567706E-01   .5161793E-01   .5862669E-01   .6694595E-01
   .7595339E-01   .8456067E-01   .9226186E-01   .9938857E-01   .1058478E+00
   .1108991E+00   .1139820E+00   .1152165E+00   .1150870E+00   .1134443E+00
   .1097749E+00   .1044326E+00   .9806118E-01   .9016341E-01   .7959573E-01
   .6653109E-01   .5282132E-01   .4023651E-01   .2921463E-01   .1955201E-01
   .1123517E-01   .4266407E-02  -.1659069E-02  -.7247160E-02  -.1314341E-01
  -.1927753E-01  -.2467887E-01  -.2780663E-01  -.2778713E-01  -.2648492E-01
  -.2719812E-01  -.3029558E-01  -.3253841E-01  -.3194302E-01  -.3066558E-01
  -.3144290E-01  -.3383813E-01  -.3618840E-01  -.3861950E-01  -.4239650E-01
  -.4742999E-01  -.5224503E-01  -.5632563E-01  -.6034909E-01  -.6419193E-01
  -.6620396E-01  -.6510650E-01  -.6155969E-01  -.5687906E-01  -.5140134E-01
  -.4498042E-01  -.3811578E-01  -.3164349E-01  -.2609705E-01  -.2191349E-01
  -.1928201E-01  -.1753783E-01  -.1535224E-01  -.1217348E-01  -.9391438E-02
  -.8367639E-02  -.8158558E-02  -.6941252E-02  -.4500028E-02  -.1737089E-02
   .8560598E-03   .3023339E-02   .4287321E-02   .4828370E-02   .5658726E-02
   .7378373E-02   .9479121E-02   .1120829E-01   .1272718E-01   .1484721E-01
   .1810087E-01   .2227824E-01   .2680796E-01   .3113773E-01   .3482766E-01
   .3765970E-01   .3950755E-01   .4011427E-01   .3955047E-01   .3815511E-01
   .3579157E-01   .3185825E-01   .2591251E-01   .1857814E-01   .1138986E-01
   .5540652E-02   .1217432E-02  -.2068791E-02  -.4934138E-02  -.7498708E-02
  -.9371323E-02  -.1057747E-01  -.1162271E-01  -.1245997E-01  -.1217017E-01
  -.9909256E-02  -.5583643E-02  -.3959554E-05   .5600458E-02   .1019449E-01
   .1343192E-01   .1580550E-01   .1762786E-01   .1833764E-01   .1763926E-01
   .1619048E-01   .1408953E-01   .1004395E-01   .2876284E-02  -.6831218E-02
  -.1712607E-01  -.2626397E-01  -.3358942E-01  -.3892957E-01  -.4109347E-01
  -.3809001E-01  -.2984282E-01  -.1910636E-01  -.8164041E-02   .3739223E-02
   .1783591E-01   .3282187E-01   .4645230E-01   .5870188E-01   .7107302E-01
   .8354716E-01   .9392179E-01   .1006951E+00   .1052104E+00   .1095604E+00
   .1138403E+00   .1169564E+00   .1185616E+00   .1193723E+00   .1199913E+00
   .1203158E+00   .1198093E+00   .1178216E+00   .1140842E+00   .1088773E+00
   .1026981E+00   .9533714E-01   .8604943E-01   .7460218E-01   .6168586E-01
   .4829169E-01   .3485867E-01   .2129624E-01   .7828060E-02  -.4652314E-02
  -.1510723E-01  -.2283718E-01  -.2748211E-01  -.2953616E-01  -.3061825E-01
  -.3195012E-01  -.3307298E-01  -.3301977E-01  -.3174010E-01  -.2985368E-01
  -.2775456E-01  -.2554354E-01  -.2371589E-01  -.2319269E-01  -.2439040E-01
  -.2671031E-01  -.2878763E-01  -.2979848E-01  -.3069995E-01  -.3390428E-01
  -.4111535E-01  -.5089065E-01  -.5949409E-01  -.6548063E-01  -.7102358E-01
  -.7776668E-01  -.8464950E-01  -.9057588E-01  -.9579820E-01  -.1000153E+00
  -.1018760E+00  -.1007161E+00  -.9738195E-01  -.9299251E-01  -.8787473E-01
  -.8217200E-01  -.7650600E-01  -.7109655E-01  -.6522893E-01  -.5829959E-01
  -.5113134E-01  -.4506409E-01  -.3980649E-01  -.3388988E-01  -.2739664E-01
  -.2223855E-01  -.1920122E-01  -.1679046E-01  -.1355738E-01  -.9904069E-02
  -.6782821E-02  -.3796509E-02   .1497245E-03   .5384182E-02   .1119598E-01
   .1681506E-01   .2194062E-01   .2617742E-01   .2923472E-01   .3132012E-01
   .3318918E-01   .3539566E-01   .3803967E-01   .4106547E-01   .4455752E-01
   .4867509E-01   .5311179E-01   .5689818E-01   .5919232E-01   .6014676E-01
   .6066220E-01   .6102420E-01   .6058156E-01   .5903723E-01   .5695147E-01
   .5523172E-01   .5440890E-01   .5420666E-01   .5382778E-01   .5262544E-01
   .5034656E-01   .4703566E-01   .4275398E-01   .3775154E-01   .3257753E-01
   .2743650E-01   .2182073E-01   .1495629E-01   .6704173E-02  -.2050982E-02
  -.1031891E-01  -.1780589E-01  -.2465996E-01  -.3116334E-01  -.3738971E-01
  -.4284191E-01  -.4681993E-01  -.4890566E-01  -.4889421E-01  -.4665866E-01
  -.4226272E-01  -.3635871E-01  -.3012401E-01  -.2468803E-01  -.2096668E-01
  -.1913715E-01  -.1878702E-01  -.1977894E-01  -.2258703E-01  -.2725906E-01
  -.3296108E-01  -.3875734E-01  -.4449362E-01  -.5054327E-01  -.5671315E-01
  -.6260515E-01  -.6830925E-01  -.7357108E-01  -.7722948E-01  -.7822196E-01
  -.7686141E-01  -.7466382E-01  -.7269013E-01  -.7062261E-01  -.6768382E-01
  -.6399781E-01  -.6029562E-01  -.5682166E-01  -.5349876E-01  -.5044894E-01
  -.4832291E-01  -.4784191E-01  -.4875110E-01  -.5020222E-01  -.5151639E-01
  -.5234080E-01  -.5258206E-01  -.5232558E-01  -.5156502E-01  -.5024091E-01
  -.4841792E-01  -.4599287E-01  -.4218796E-01  -.3592077E-01  -.2747972E-01
  -.1881864E-01  -.1121767E-01  -.3540051E-02   .5814091E-02   .1624205E-01
   .2559739E-01   .3290402E-01   .3894564E-01   .4455913E-01   .4932799E-01
   .5225835E-01   .5288496E-01   .5107695E-01   .4659243E-01   .3966739E-01
   .3098585E-01   .2127805E-01   .1156339E-01   .2922562E-02  -.4718533E-02
  -.1246928E-01  -.2042926E-01  -.2725614E-01  -.3201489E-01  -.3505505E-01
  -.3646460E-01  -.3521289E-01  -.3091282E-01  -.2582284E-01  -.2290349E-01
  -.2250813E-01  -.2211098E-01  -.1928230E-01  -.1464542E-01  -.1058522E-01
  -.8035427E-02  -.6176305E-02  -.4898679E-02  -.5919273E-02  -.1032997E-01
  -.1686576E-01  -.2363098E-01  -.3007405E-01  -.3631795E-01  -.4167560E-01
  -.4543486E-01  -.4802611E-01  -.5001873E-01  -.5045558E-01  -.4757918E-01
  -.4113863E-01  -.3235870E-01  -.2265515E-01  -.1306442E-01  -.4600058E-02
   .2079607E-02   .7847464E-02   .1416179E-01   .2049297E-01   .2442688E-01
   .2488392E-01   .2414296E-01   .2553165E-01   .2987237E-01   .3551685E-01
   .4069959E-01   .4431135E-01   .4575761E-01   .4559200E-01   .4557926E-01
   .4806450E-01   .5445540E-01   .6225147E-01   .6546138E-01   .6010866E-01
   .4853967E-01   .3713308E-01   .3030958E-01   .2841772E-01   .2945892E-01
   .3012407E-01   .2703181E-01   .1935029E-01   .1025520E-01   .4204647E-02
   .2188255E-02   .1213874E-03  -.6171058E-02  -.1241987E-01  -.7071476E-02
   .1320656E-01   .3315708E-01   .3458527E-01   .2028849E-01   .8712737E-02
   .6656720E-02   .4615937E-02  -.1071487E-02  -.1372816E-02   .7677466E-02
   .1776471E-01   .2251390E-01   .2523800E-01   .2974235E-01   .3319425E-01
   .3159320E-01   .2596839E-01   .1998265E-01   .1495773E-01   .1020483E-01
   .5403181E-02  -.7483714E-03  -.1100550E-01  -.2451543E-01  -.3417002E-01
  -.3394077E-01  -.2723653E-01  -.2273779E-01  -.2369582E-01  -.2516224E-01
  -.2043034E-01  -.7623495E-02   .1003060E-01   .2770094E-01   .4191242E-01
   .5119152E-01   .5459164E-01   .5134187E-01   .4300964E-01   .3398520E-01
   .2723152E-01   .2120119E-01   .1312129E-01   .2712921E-02  -.8875472E-02
  -.2091350E-01  -.3203025E-01  -.3965524E-01  -.4238326E-01  -.4114820E-01
  -.3718375E-01  -.3049334E-01  -.2150367E-01  -.1215822E-01  -.4216885E-02
   .2317706E-02   .8231685E-02   .1404877E-01   .1991157E-01   .2569335E-01
   .3129646E-01   .3661558E-01   .4131737E-01   .4471653E-01   .4581404E-01
   .4392056E-01   .3932913E-01   .3303859E-01   .2602011E-01   .1833000E-01
   .9328506E-02  -.8972194E-03  -.1100818E-01  -.1916669E-01  -.2432951E-01
  -.2654296E-01  -.2662546E-01  -.2534743E-01  -.2274918E-01  -.1839843E-01
  -.1260678E-01  -.6168622E-02   .8321298E-03   .9152033E-02   .1915699E-01
   .2938319E-01   .3740613E-01   .4195245E-01   .4337407E-01   .4269979E-01
   .4074252E-01   .3771471E-01   .3354708E-01   .2856496E-01   .2379715E-01
   .1996490E-01   .1695180E-01   .1435846E-01   .1222078E-01   .1089137E-01
   .1025893E-01   .1010708E-01   .1113845E-01   .1451231E-01   .2011911E-01
   .2595905E-01   .2986476E-01   .3155346E-01   .3303592E-01   .3678686E-01
   .4320192E-01   .5047707E-01   .5635516E-01   .6003203E-01   .6234016E-01
   .6393368E-01   .6382301E-01   .6017437E-01   .5236856E-01   .4183263E-01
   .3087345E-01   .2098234E-01   .1268677E-01   .6006445E-02   .6768229E-03
  -.3310946E-02  -.4963068E-02  -.2124500E-02   .5722369E-02   .1348451E-01
   .1404342E-01   .7984682E-02   .3839827E-02   .6023220E-02   .9375590E-02
   .8169518E-02   .3823129E-02   .3628969E-03  -.1933233E-02  -.5124444E-02
  -.9626747E-02  -.1405378E-01  -.1736814E-01  -.1919226E-01  -.1932310E-01
  -.1837183E-01  -.1805420E-01  -.1957949E-01  -.2213561E-01  -.2440320E-01
  -.2628924E-01  -.2820427E-01  -.3010111E-01  -.3173019E-01  -.3290725E-01
  -.3300643E-01  -.3138746E-01  -.2842389E-01  -.2451215E-01  -.1894279E-01
  -.1188455E-01  -.6690797E-02  -.7142019E-02  -.1224715E-01  -.1713317E-01
  -.1882514E-01  -.1825393E-01  -.1709176E-01  -.1593359E-01  -.1474915E-01
  -.1278091E-01  -.9455915E-02  -.5509544E-02  -.2515273E-02  -.9103332E-03
  -.2901632E-04  -.1435181E-03  -.2600040E-02  -.7746423E-02  -.1398868E-01
  -.1940219E-01  -.2395773E-01  -.2940544E-01  -.3679199E-01  -.4506297E-01
  -.5243901E-01  -.5816602E-01  -.6258716E-01  -.6634157E-01  -.6981675E-01
  -.7295760E-01  -.7567580E-01  -.7822673E-01  -.8050854E-01  -.8184681E-01
  -.8217551E-01  -.8277813E-01  -.8510089E-01  -.8872025E-01  -.9141644E-01
  -.9191061E-01  -.9148385E-01  -.9235680E-01  -.9505273E-01  -.9851374E-01
  -.1022500E+00  -.1067422E+00  -.1121579E+00  -.1176757E+00  -.1219783E+00
  -.1240621E+00  -.1237848E+00  -.1219615E+00  -.1195831E+00  -.1166483E+00
  -.1128359E+00  -.1088724E+00  -.1056241E+00  -.1029469E+00  -.1000698E+00
  -.9647956E-01  -.9259440E-01  -.8953376E-01  -.8759101E-01  -.8563202E-01
  -.8305431E-01  -.8102217E-01  -.8058715E-01  -.8101982E-01  -.8070841E-01
  -.7858620E-01  -.7431085E-01  -.6723366E-01  -.5616334E-01  -.3993793E-01
  -.1847288E-01   .6801766E-02   .3363552E-01   .6068249E-01   .8784789E-01
   .1140603E+00   .1355125E+00   .1475644E+00   .1484323E+00   .1405775E+00
   .1286286E+00   .1168827E+00   .1083609E+00   .1033724E+00   .9911765E-01
   .9294926E-01   .8550750E-01   .7882984E-01   .7321490E-01   .6785887E-01
   .6292370E-01   .5938165E-01   .5792836E-01   .5861219E-01   .6142073E-01
   .6703302E-01   .7557754E-01   .8473826E-01   .9068582E-01   .9199535E-01
   .9055302E-01   .8739988E-01   .8086102E-01   .7077232E-01   .6078079E-01
   .5438706E-01   .5096416E-01   .4744575E-01   .4285942E-01   .3833454E-01
   .3362581E-01   .2666749E-01   .1669063E-01   .6382574E-02  -.2523737E-03
  -.2023996E-02  -.7982423E-03   .1415538E-02   .4440554E-02   .8730386E-02
   .1368205E-01   .1819394E-01   .2316101E-01   .3187062E-01   .4584113E-01
   .6193472E-01   .7556034E-01   .8563883E-01   .9415241E-01   .1024108E+00
   .1097452E+00   .1142719E+00   .1139325E+00   .1088855E+00   .1029928E+00
   .1003698E+00   .1003803E+00   .9774940E-01   .8714275E-01   .6741757E-01
   .4309410E-01   .2135147E-01   .5705736E-02  -.6597923E-02  -.1893529E-01
  -.3049280E-01  -.3958572E-01  -.4666719E-01  -.5220970E-01  -.5589432E-01
  -.5818552E-01  -.6024869E-01  -.6257172E-01  -.6465988E-01  -.6466711E-01
  -.5980368E-01  -.5042234E-01  -.4351015E-01  -.4724336E-01  -.6124301E-01
  -.7660015E-01  -.8669499E-01  -.9328792E-01  -.1015305E+00  -.1121152E+00
  -.1189100E+00  -.1138034E+00  -.9625337E-01  -.7815333E-01  -.7327447E-01
  -.8344691E-01  -.1007541E+00  -.1167931E+00  -.1251281E+00  -.1227002E+00
  -.1126539E+00  -.1011857E+00  -.9097325E-01  -.8107442E-01  -.7096161E-01
  -.6033554E-01  -.4727069E-01  -.3049703E-01  -.1149127E-01   .7374185E-02
   .2539875E-01   .4316627E-01   .6030713E-01   .7548955E-01   .8780611E-01
   .9706136E-01   .1034036E+00   .1071526E+00   .1091906E+00   .1111440E+00
   .1143112E+00   .1184016E+00   .1211253E+00   .1192371E+00   .1110201E+00
   .9843768E-01   .8562622E-01   .7463685E-01   .6345536E-01   .4916205E-01
   .3243123E-01   .1667242E-01   .3420203E-02  -.8065666E-02  -.1763110E-01
  -.2405613E-01  -.2782358E-01  -.3097783E-01  -.3401045E-01  -.3449978E-01
  -.2953979E-01  -.1954526E-01  -.9782747E-02  -.6979684E-02  -.1308488E-01
  -.2312025E-01  -.2963759E-01  -.2942379E-01  -.2502766E-01  -.2060547E-01
  -.1851150E-01  -.1928236E-01  -.2213604E-01  -.2476544E-01  -.2423449E-01
  -.1977619E-01  -.1432559E-01  -.1197885E-01  -.1409965E-01  -.1884678E-01
  -.2426296E-01  -.3061341E-01  -.3882384E-01  -.4731440E-01  -.5215694E-01
  -.5055661E-01  -.4349774E-01  -.3519045E-01  -.3014443E-01  -.3134333E-01
  -.3904209E-01  -.5037910E-01  -.6148982E-01  -.7070687E-01  -.7943666E-01
  -.9027239E-01  -.1040176E+00  -.1168722E+00  -.1222292E+00  -.1180912E+00
  -.1113488E+00  -.1118912E+00  -.1225078E+00  -.1370115E+00  -.1477363E+00
  -.1521583E+00  -.1529454E+00  -.1545453E+00  -.1598666E+00  -.1679930E+00
  -.1746422E+00  -.1757045E+00  -.1708773E+00  -.1636396E+00  -.1580846E+00
  -.1555355E+00  -.1534873E+00  -.1481872E+00  -.1379248E+00  -.1242296E+00
  -.1103173E+00  -.9727382E-01  -.8361280E-01  -.6821235E-01  -.5169553E-01
  -.3451054E-01  -.1628713E-01   .1407433E-02   .1517715E-01   .2432458E-01
   .3314276E-01   .4617301E-01   .6205007E-01   .7491112E-01   .8129466E-01
   .8363500E-01   .8728611E-01   .9530513E-01   .1067213E+00   .1190396E+00
   .1303283E+00   .1386071E+00   .1416348E+00   .1385880E+00   .1314191E+00
   .1239480E+00   .1196374E+00   .1196357E+00   .1221567E+00   .1236359E+00
   .1219321E+00   .1178849E+00   .1126100E+00   .1057622E+00   .9751878E-01
   .8971199E-01   .8359012E-01   .7736399E-01   .6741454E-01   .5182612E-01
   .3229588E-01   .1243958E-01  -.5345820E-02  -.2151559E-01  -.3844385E-01
  -.5723925E-01  -.7652978E-01  -.9495283E-01  -.1122751E+00  -.1270646E+00
  -.1363923E+00  -.1400193E+00  -.1422227E+00  -.1470902E+00  -.1543841E+00
  -.1610411E+00  -.1641724E+00  -.1613181E+00  -.1513322E+00  -.1374919E+00
  -.1279583E+00  -.1297614E+00  -.1419774E+00  -.1561821E+00  -.1631066E+00
  -.1575887E+00  -.1391016E+00  -.1115935E+00  -.8181618E-01  -.5192513E-01
  -.1531043E-01   .3336493E-01   .8694010E-01   .1327959E+00   .1678235E+00
   .1985491E+00   .2284837E+00   .2530774E+00   .2674372E+00   .2731850E+00
   .2760994E+00   .2806254E+00   .2880107E+00   .2972014E+00   .3064171E+00
   .3151232E+00   .3240584E+00   .3330039E+00   .3395967E+00   .3381041E+00
   .3217100E+00   .2915075E+00   .2580948E+00   .2288071E+00   .2020548E+00
   .1781109E+00   .1635777E+00   .1592656E+00   .1544627E+00   .1401143E+00
   .1199001E+00   .1024595E+00   .8904435E-01   .7473254E-01   .5741845E-01
   .4017597E-01   .2643906E-01   .1624465E-01   .7822248E-02   .1275118E-02
  -.7369600E-03   .3233906E-02   .9931760E-02   .1321079E-01   .8809926E-02
  -.3023755E-02  -.1872869E-01  -.3456394E-01  -.4918901E-01  -.6386599E-01
  -.8088256E-01  -.1019578E+00  -.1263186E+00  -.1477642E+00  -.1536621E+00
  -.1366217E+00  -.1172103E+00  -.1339072E+00  -.1848542E+00  -.2131098E+00
  -.1857697E+00  -.1460018E+00  -.1481048E+00  -.1780832E+00  -.1752461E+00
  -.1233504E+00  -.8630318E-01  -.1201703E+00  -.1839455E+00  -.2005500E+00
  -.1695312E+00  -.1469434E+00  -.1492230E+00  -.1471413E+00  -.1294999E+00
  -.1148393E+00  -.1129235E+00  -.1141906E+00  -.1115107E+00  -.1060320E+00
  -.9310652E-01  -.6108013E-01  -.1007891E-01   .3776369E-01   .5702658E-01
   .4699861E-01   .3295211E-01   .3734296E-01   .5721874E-01   .7482782E-01
   .8440617E-01   .9841839E-01   .1267479E+00   .1604022E+00   .1838632E+00
   .1958272E+00   .2062055E+00   .2184746E+00   .2281354E+00   .2348713E+00
   .2431830E+00   .2521084E+00   .2542530E+00   .2472250E+00   .2388488E+00
   .2370569E+00   .2438077E+00   .2621331E+00   .2920606E+00   .3171101E+00
   .3181605E+00   .3036024E+00   .3013016E+00   .3192530E+00   .3397907E+00
   .3522772E+00   .3653976E+00   .3832497E+00   .3938701E+00   .3911383E+00
   .3873994E+00   .3929022E+00   .3978143E+00   .3836912E+00   .3419369E+00
   .2802032E+00   .2187777E+00   .1735387E+00   .1397041E+00   .1024965E+00
   .6016264E-01   .2349485E-01  -.9762356E-03  -.1519491E-01  -.2417549E-01
  -.3376974E-01  -.4614240E-01  -.5464204E-01  -.5034787E-01  -.3455573E-01
  -.1746679E-01  -.4109414E-02   .1129391E-01   .3280133E-01   .4958508E-01
   .4627731E-01   .2725569E-01   .1637877E-01   .2747391E-01   .4983671E-01
   .6649256E-01   .7037696E-01   .6080271E-01   .4015506E-01   .1757233E-01
   .4748042E-02   .5523045E-02   .1674813E-01   .3744156E-01   .6616924E-01
   .9166306E-01   .9736007E-01   .7846604E-01   .4897191E-01   .2984514E-01
   .3178762E-01   .4778993E-01   .5972577E-01   .5294567E-01   .2675276E-01
  -.7078773E-02  -.3532768E-01  -.5294407E-01  -.6316595E-01  -.7169466E-01
  -.8308343E-01  -.1000778E+00  -.1220517E+00  -.1446043E+00  -.1631413E+00
  -.1757779E+00  -.1821727E+00  -.1833132E+00  -.1828958E+00  -.1851554E+00
  -.1907822E+00  -.1974876E+00  -.2034435E+00  -.2063975E+00  -.2013435E+00
  -.1864636E+00  -.1713040E+00  -.1703212E+00  -.1860546E+00  -.2047340E+00
  -.2128168E+00  -.2132502E+00  -.2192376E+00  -.2349787E+00  -.2502991E+00
  -.2539494E+00  -.2462795E+00  -.2366630E+00  -.2318740E+00  -.2288934E+00
  -.2183404E+00  -.1938413E+00  -.1575828E+00  -.1185710E+00  -.8825982E-01
  -.7579605E-01  -.7992232E-01  -.8593226E-01  -.7891727E-01  -.6025651E-01
  -.4318347E-01  -.3431095E-01  -.3012538E-01  -.2829827E-01  -.2922314E-01
  -.2890414E-01  -.2146975E-01  -.8541811E-02   .7615827E-04  -.5182585E-02
  -.2550628E-01  -.5221898E-01  -.7457508E-01  -.8985843E-01  -.1032408E+00
  -.1166482E+00  -.1206534E+00  -.1041427E+00  -.8312246E-01  -.1014131E+00
  -.1635570E+00  -.2020602E+00  -.1721913E+00  -.1303640E+00  -.1471540E+00
  -.1985808E+00  -.2189677E+00  -.2067400E+00  -.2031392E+00  -.2114721E+00
  -.2065117E+00  -.1923450E+00  -.1950885E+00  -.2157601E+00  -.2311305E+00
  -.2332757E+00  -.2376562E+00  -.2535359E+00  -.2706058E+00  -.2779899E+00
  -.2797976E+00  -.2860117E+00  -.2986197E+00  -.3126610E+00  -.3248104E+00
  -.3344206E+00  -.3392674E+00  -.3390073E+00  -.3407893E+00  -.3515041E+00
  -.3660526E+00  -.3742064E+00  -.3763696E+00  -.3799456E+00  -.3842929E+00
  -.3819519E+00  -.3713824E+00  -.3583632E+00  -.3478384E+00  -.3424762E+00
  -.3431799E+00  -.3442857E+00  -.3377956E+00  -.3257945E+00  -.3169420E+00
  -.3119111E+00  -.3030038E+00  -.2851981E+00  -.2593382E+00  -.2248514E+00
  -.1791921E+00  -.1285295E+00  -.8482898E-01  -.4954640E-01  -.1337158E-01
   .2943521E-01   .7815624E-01   .1314962E+00   .1848074E+00   .2272460E+00
   .2553974E+00   .2861075E+00   .3408663E+00   .4165833E+00   .4837945E+00
   .5140569E+00   .5010436E+00   .4679547E+00   .4651880E+00   .5279431E+00
   .6245882E+00   .6890497E+00   .7033814E+00   .7006592E+00   .7000998E+00
   .6937664E+00   .6840380E+00   .6839314E+00   .6897071E+00   .6893779E+00
   .6861537E+00   .6883193E+00   .6908118E+00   .6867807E+00   .6830083E+00
   .6874249E+00   .6933439E+00   .6878816E+00   .6683133E+00   .6407804E+00
   .6084572E+00   .5704653E+00   .5310022E+00   .5009226E+00   .4855784E+00
   .4757114E+00   .4567344E+00   .4247062E+00   .3874749E+00   .3524599E+00
   .3200482E+00   .2876443E+00   .2550432E+00   .2260273E+00   .2058576E+00
   .1965191E+00   .1930445E+00   .1856944E+00   .1680567E+00   .1428038E+00
   .1181781E+00   .1006699E+00   .9178580E-01   .8885799E-01   .8619601E-01
   .7788957E-01   .6256855E-01   .4496485E-01   .3071192E-01   .2080014E-01
   .1253151E-01   .3699311E-02  -.5882085E-02  -.1544417E-01  -.2479196E-01
  -.3418339E-01  -.4394812E-01  -.5523433E-01  -.6862191E-01  -.8213339E-01
  -.9235376E-01  -.9733772E-01  -.9791024E-01  -.9659394E-01  -.9591405E-01
  -.9679835E-01  -.9859875E-01  -.1011987E+00  -.1053263E+00  -.1092344E+00
  -.1085752E+00  -.1025742E+00  -.9780459E-01  -.1012080E+00  -.1033636E+00
  -.7486752E-01  -.7606005E-02   .3611486E-01  -.3708553E-01  -.2320539E+00
  -.4244081E+00  -.4920684E+00  -.4618860E+00  -.4566523E+00  -.5222418E+00
  -.5977190E+00  -.6450057E+00  -.7059910E+00  -.7948298E+00  -.8214645E+00
  -.7226725E+00  -.6069876E+00  -.6232241E+00  -.7234619E+00  -.7224622E+00
  -.5829366E+00  -.4735371E+00  -.5119919E+00  -.6054230E+00  -.6140595E+00
  -.5445209E+00  -.4908404E+00  -.4757508E+00  -.4474302E+00  -.3834854E+00
  -.3163870E+00  -.2736516E+00  -.2482792E+00  -.2282888E+00  -.2219587E+00
  -.2333974E+00  -.2218952E+00  -.1312720E+00   .1805953E-01   .1242856E+00
   .1320812E+00   .1081516E+00   .1462921E+00   .2476295E+00   .3375620E+00
   .3655788E+00   .3475349E+00   .3245437E+00   .3124787E+00   .2985931E+00
   .2729073E+00   .2436550E+00   .2176637E+00   .1854666E+00   .1423068E+00
   .1073400E+00   .1009217E+00   .1144034E+00   .1215205E+00   .1119749E+00
   .9761683E-01   .9143762E-01   .9520290E-01   .1050602E+00   .1174457E+00
   .1278502E+00   .1320356E+00   .1318937E+00   .1344097E+00   .1417678E+00
   .1451264E+00   .1331167E+00   .1079175E+00   .8595754E-01   .7908404E-01
   .8313685E-01   .8897007E-01   .9302637E-01   .9161092E-01   .7728667E-01
   .4983470E-01   .2168225E-01   .1315973E-02  -.2031832E-01  -.5612110E-01
  -.1039831E+00  -.1500297E+00  -.1831101E+00  -.2009519E+00  -.2071228E+00
  -.2053188E+00  -.1956916E+00  -.1775227E+00  -.1541014E+00  -.1306504E+00
  -.1075814E+00  -.8091954E-01  -.4907284E-01  -.1452835E-01   .2052580E-01
   .5662260E-01   .9477010E-01   .1327926E+00   .1634982E+00   .1781053E+00
   .1741137E+00   .1612214E+00   .1583751E+00   .1794532E+00   .2152722E+00
   .2368002E+00   .2282404E+00   .2097646E+00   .2119001E+00   .2338592E+00
   .2462429E+00   .2326099E+00   .2084013E+00   .1958586E+00   .1976143E+00
   .2027431E+00   .2034273E+00   .1941699E+00   .1695940E+00   .1367531E+00
   .1162902E+00   .1171192E+00   .1233609E+00   .1191529E+00   .1096836E+00
   .1036822E+00   .9475324E-01   .7769999E-01   .6394435E-01   .6253304E-01
   .6106729E-01   .4261092E-01   .1088106E-01  -.1572570E-01  -.2841019E-01
  -.3567822E-01  -.4951138E-01  -.7035401E-01  -.8736120E-01  -.8872683E-01
  -.6664763E-01  -.1649544E-01   .5445817E-01   .1069408E+00   .7377330E-01
  -.7600275E-01  -.2733220E+00  -.4024855E+00  -.4257986E+00  -.3876476E+00
  -.3115615E+00  -.2052900E+00  -.1423883E+00  -.1926321E+00  -.2896222E+00
  -.3056346E+00  -.2365837E+00  -.1888757E+00  -.2071565E+00  -.2316822E+00
  -.2143103E+00  -.1783448E+00  -.1586046E+00  -.1532219E+00  -.1479663E+00
  -.1405023E+00  -.1269378E+00  -.9587099E-01  -.4657664E-01   .3842226E-02
   .3689552E-01   .4637732E-01   .3487463E-01   .8449337E-02  -.2194081E-01
  -.4642163E-01  -.6366726E-01  -.6738783E-01  -.4237352E-01   .1508290E-02
   .2136278E-01  -.4338029E-02  -.4573229E-01  -.6668823E-01  -.6739404E-01
  -.7592157E-01  -.1190634E+00  -.1885695E+00  -.2345683E+00  -.2229383E+00
  -.1850698E+00  -.1717477E+00  -.1819301E+00  -.1792301E+00  -.1551170E+00
  -.1336533E+00  -.1268460E+00  -.1199651E+00  -.9999390E-01  -.7582695E-01
  -.6203272E-01  -.5632028E-01  -.4770472E-01  -.4068966E-01  -.5092530E-01
  -.7710133E-01  -.9878043E-01  -.1046490E+00  -.1029645E+00  -.1009355E+00
  -.9367374E-01  -.7867700E-01  -.6284312E-01  -.5033858E-01  -.3757829E-01
  -.2195006E-01  -.4847877E-02   .1386610E-01   .3614934E-01   .6100520E-01
   .8470332E-01   .1051775E+00   .1238676E+00   .1433903E+00   .1652265E+00
   .1890137E+00   .2133361E+00   .2366112E+00   .2569489E+00   .2729843E+00
   .2856669E+00   .2968644E+00   .3054004E+00   .3075655E+00   .3018922E+00
   .2913215E+00   .2791100E+00   .2655159E+00   .2497143E+00   .2311700E+00
   .2084807E+00   .1809688E+00   .1510473E+00   .1223770E+00   .9740408E-01
   .7789352E-01   .6405986E-01   .5254611E-01   .4006907E-01   .2895623E-01
   .2525176E-01   .3188169E-01   .4761894E-01   .7121939E-01   .1017339E+00
   .1344875E+00   .1616432E+00   .1803588E+00   .1967641E+00   .2180150E+00
   .2425561E+00   .2616165E+00   .2675853E+00   .2621357E+00   .2610036E+00
   .2821452E+00   .3244194E+00   .3680714E+00   .3922517E+00   .3841829E+00
   .3471601E+00   .3101354E+00   .3066112E+00   .3311372E+00   .3401222E+00
   .3059561E+00   .2475644E+00   .1980455E+00   .1628433E+00   .1263647E+00
   .8383981E-01   .4322702E-01   .3682047E-02  -.4333084E-01  -.9347260E-01
  -.1318158E+00  -.1560512E+00  -.1816230E+00  -.2220188E+00  -.2740370E+00
  -.3252743E+00  -.3703637E+00  -.4145898E+00  -.4638476E+00  -.5166064E+00
  -.5641752E+00  -.5961025E+00  -.6134269E+00  -.6384699E+00  -.6840589E+00
  -.7032249E+00  -.6289079E+00  -.4893929E+00  -.4004490E+00  -.4155383E+00
  -.4768736E+00  -.5216944E+00  -.5448830E+00  -.5584597E+00  -.5615267E+00
  -.5531537E+00  -.5378365E+00  -.5173056E+00  -.4904586E+00  -.4571520E+00
  -.4167445E+00  -.3681680E+00  -.3133654E+00  -.2573858E+00  -.2069723E+00
  -.1675176E+00  -.1314468E+00  -.7369673E-01   .1955117E-01   .1210299E+00
   .1898494E+00   .2258012E+00   .2630378E+00   .3163405E+00   .3701003E+00
   .4128529E+00   .4488506E+00   .4784257E+00   .4944036E+00   .5014177E+00
   .5196623E+00   .5555683E+00   .5821526E+00   .5744183E+00   .5499024E+00
   .5358388E+00   .5158679E+00   .4590132E+00   .3825619E+00   .3341201E+00
   .3201191E+00   .2924501E+00   .2185043E+00   .1393158E+00   .1167998E+00
   .1329346E+00   .1042832E+00   .7525712E-02  -.7158255E-01  -.4465740E-01
   .6540980E-01   .1536966E+00   .1560192E+00   .1063612E+00   .7304385E-01
   .7393789E-01   .7706250E-01   .6240013E-01   .4673344E-01   .4805610E-01
   .5671404E-01   .5332679E-01   .3483065E-01   .1086837E-01  -.1199968E-01
  -.3211010E-01  -.4808337E-01  -.6070403E-01  -.7357700E-01  -.8816238E-01
  -.1026198E+00  -.1182275E+00  -.1407666E+00  -.1708910E+00  -.1980526E+00
  -.2116523E+00  -.2147035E+00  -.2167577E+00  -.2191786E+00  -.2193115E+00
  -.2211268E+00  -.2308359E+00  -.2499007E+00  -.2772475E+00  -.3078767E+00
  -.3251431E+00  -.3082627E+00  -.2560816E+00  -.1933113E+00  -.1457642E+00
  -.1171146E+00  -.9595256E-01  -.7507293E-01  -.5339015E-01  -.2777964E-01
   .4271923E-02   .3807725E-01   .6642023E-01   .8732280E-01   .1029114E+00
   .1157046E+00   .1293627E+00   .1490573E+00   .1774908E+00   .2105596E+00
   .2363009E+00   .2402099E+00   .2174427E+00   .1843630E+00   .1787558E+00
   .2377889E+00   .3492150E+00   .4360489E+00   .4359822E+00   .3768208E+00
   .3219080E+00   .2747299E+00   .1951752E+00   .8535095E-01   .9365048E-02
   .1253001E-01   .5011836E-01   .5425861E-01   .3682850E-01   .3892087E-01
   .3559456E-01  -.8842523E-02  -.5657241E-01  -.5853437E-01  -.3712908E-01
  -.3581744E-01  -.4425382E-01  -.3105173E-01  -.3928310E-02   .1031082E-01
   .1284364E-01   .2219221E-01   .3800573E-01   .4435339E-01   .3848054E-01
   .3369416E-01   .3656050E-01   .3884764E-01   .3290232E-01   .2107396E-01
   .7279452E-02  -.1030931E-01  -.3323425E-01  -.5635445E-01  -.7338832E-01
  -.8461155E-01  -.9448251E-01  -.1051926E+00  -.1160855E+00  -.1218536E+00
  -.1109057E+00  -.8689044E-01  -.8620870E-01  -.1384833E+00  -.2179211E+00
  -.2738918E+00  -.2985814E+00  -.3240041E+00  -.3605712E+00  -.3775040E+00
  -.3492422E+00  -.2982484E+00  -.2743719E+00  -.2954277E+00  -.3282253E+00
  -.3345438E+00  -.3149475E+00  -.2937895E+00  -.2817586E+00  -.2710054E+00
  -.2540823E+00  -.2307263E+00  -.2029019E+00  -.1744954E+00  -.1508899E+00
  -.1326803E+00  -.1139186E+00  -.8867807E-01  -.5642449E-01  -.2150317E-01
   .1146852E-01   .4277771E-01   .7735438E-01   .1185621E+00   .1643009E+00
   .2101088E+00   .2521190E+00   .2868138E+00   .3123111E+00   .3275328E+00
   .3234587E+00   .2822713E+00   .1992198E+00   .9927862E-01   .1818764E-01
  -.3190086E-01  -.6847797E-01  -.1098056E+00  -.1527985E+00  -.1866830E+00
  -.2158140E+00  -.2556501E+00  -.3130331E+00  -.3805443E+00  -.4435366E+00
  -.4886211E+00  -.5182252E+00  -.5521202E+00  -.5903084E+00  -.5876978E+00
  -.5035361E+00  -.3660846E+00  -.2533271E+00  -.2161670E+00  -.2460909E+00
  -.3059855E+00  -.3628483E+00  -.3886400E+00  -.3598275E+00  -.2849428E+00
  -.2187087E+00  -.2115112E+00  -.2473355E+00  -.2647336E+00  -.2326945E+00
  -.1720933E+00  -.1110148E+00  -.5774184E-01  -.1549059E-01   .1079964E-01
   .2661644E-01   .4297759E-01   .5631448E-01   .5098151E-01   .2337501E-01
  -.1101928E-01  -.3765651E-01  -.5898081E-01  -.8489985E-01  -.1148390E+00
  -.1366187E+00  -.1415522E+00  -.1342374E+00  -.1263613E+00  -.1237543E+00
  -.1205614E+00  -.1063537E+00  -.7865278E-01  -.4817607E-01  -.2927669E-01
  -.2399383E-01  -.2121775E-01  -.1265076E-01  -.1709959E-02   .6457844E-02
   .1420044E-01   .2495502E-01   .3557737E-01   .4205000E-01   .4701280E-01
   .5526335E-01   .6610938E-01   .7473786E-01   .7765033E-01   .7434203E-01
   .6687562E-01   .5878841E-01   .5292835E-01   .4951291E-01   .4639539E-01
   .4225459E-01   .3857386E-01   .3799154E-01   .4093803E-01   .4563898E-01
   .5116220E-01   .5795284E-01   .6640244E-01   .7656510E-01   .8816764E-01
   .9999340E-01   .1100871E+00   .1180963E+00   .1256198E+00   .1337058E+00
   .1416912E+00   .1490936E+00   .1564852E+00   .1642846E+00   .1720616E+00
   .1794915E+00   .1870845E+00   .1955180E+00   .2044294E+00   .2127880E+00
   .2204091E+00   .2286305E+00   .2394072E+00   .2541427E+00   .2722812E+00
   .2900220E+00   .3022416E+00   .3080695E+00   .3118825E+00   .3170159E+00
   .3225890E+00   .3276309E+00   .3334136E+00   .3400227E+00   .3428410E+00
   .3353524E+00   .3147442E+00   .2836432E+00   .2487595E+00   .2176937E+00
   .1932237E+00   .1713311E+00   .1475373E+00   .1232197E+00   .1019135E+00
   .8109755E-01   .5498420E-01   .2484161E-01  -.2492294E-02  -.2466547E-01
  -.4270887E-01  -.5623385E-01  -.6771627E-01  -.8404587E-01  -.1091969E+00
  -.1414700E+00  -.1781333E+00  -.2147705E+00  -.2415604E+00  -.2500412E+00
  -.2427438E+00  -.2286944E+00  -.2129849E+00  -.1973723E+00  -.1854852E+00
  -.1808601E+00  -.1826548E+00  -.1815303E+00  -.1611906E+00  -.1173159E+00
  -.7230546E-01  -.5219601E-01  -.5297554E-01  -.4940808E-01  -.3197393E-01
  -.1539626E-01  -.1213447E-01  -.1547089E-01  -.1294777E-01  -.4932224E-02
  -.2259739E-02  -.9342458E-02  -.1898921E-01  -.2455110E-01  -.2826873E-01
  -.3491281E-01  -.4399212E-01  -.5049548E-01  -.4926267E-01  -.3804475E-01
  -.1915893E-01   .2239198E-02   .2321460E-01   .4507037E-01   .6897807E-01
   .9204047E-01   .1111563E+00   .1290438E+00   .1511769E+00   .1772286E+00
   .2012115E+00   .2205252E+00   .2386618E+00   .2583232E+00   .2770676E+00
   .2906007E+00   .2971644E+00   .2976315E+00   .2942959E+00   .2916331E+00
   .2938175E+00   .2984243E+00   .2964916E+00   .2814047E+00   .2548165E+00
   .2211778E+00   .1812769E+00   .1368273E+00   .9594011E-01   .6613149E-01
   .4528887E-01   .2532326E-01   .2474612E-02  -.2000884E-01  -.3564663E-01
  -.3887491E-01  -.3152114E-01  -.2394245E-01  -.2250743E-01  -.2043426E-01
  -.9156258E-02   .6706317E-02   .1359447E-01   .8139379E-02   .1040776E-01
   .4737399E-01   .1133926E+00   .1664937E+00   .1797576E+00   .1715284E+00
   .1685929E+00   .1696166E+00   .1616250E+00   .1444874E+00   .1244773E+00
   .1027844E+00   .7964336E-01   .5751613E-01   .3684301E-01   .1646673E-01
  -.2251917E-02  -.1646792E-01  -.2633791E-01  -.3451206E-01  -.4062611E-01
  -.4045667E-01  -.3291644E-01  -.2323562E-01  -.1679589E-01  -.1408569E-01
  -.1276932E-01  -.9980985E-02  -.2362847E-02   .1062947E-01   .2377057E-01
   .3151019E-01   .3455315E-01   .3712396E-01   .3948373E-01   .3734225E-01
   .2886773E-01   .1751789E-01   .7379295E-02  -.5361278E-03  -.7059084E-02
  -.1253375E-01  -.1681063E-01  -.1992908E-01  -.2121377E-01  -.1845688E-01
  -.9946454E-02   .2880224E-02   .1661704E-01   .2892368E-01   .3870977E-01
   .4549997E-01   .4979565E-01   .5241944E-01   .5323783E-01   .5142022E-01
   .4713747E-01   .4184962E-01   .3681172E-01   .3285637E-01   .3067848E-01
   .3027275E-01   .3151258E-01   .3492499E-01   .4101758E-01   .4879717E-01
   .5590809E-01   .6175588E-01   .6871593E-01   .7798161E-01   .8713187E-01
   .9353717E-01   .9754043E-01   .1008284E+00   .1026738E+00   .1005948E+00
   .9392033E-01   .8486916E-01   .7661728E-01   .7072286E-01   .6680476E-01
   .6412553E-01   .6234319E-01   .6134734E-01   .6140074E-01   .6307102E-01
   .6657780E-01   .7125288E-01   .7578205E-01   .7924789E-01   .8209385E-01
   .8558488E-01   .8952980E-01   .9256676E-01   .9472177E-01   .9772401E-01
   .1022176E+00   .1059353E+00   .1057654E+00   .1009973E+00   .9327559E-01
   .8446465E-01   .7560010E-01   .6697805E-01   .5780096E-01   .4742219E-01
   .3710637E-01   .2882303E-01   .2263133E-01   .1641388E-01   .8615173E-02
  -.8974094E-03  -.1204539E-01  -.2497740E-01  -.3961820E-01  -.5560673E-01
  -.7223371E-01  -.8832222E-01  -.1025639E+00  -.1143961E+00  -.1237515E+00
  -.1308601E+00  -.1363800E+00  -.1404243E+00  -.1422031E+00  -.1415157E+00
  -.1394598E+00  -.1363719E+00  -.1301736E+00  -.1184286E+00  -.1012080E+00
  -.8084410E-01  -.6034313E-01  -.4301044E-01  -.3122178E-01  -.2464731E-01
  -.2053196E-01  -.1681534E-01  -.1399557E-01  -.1298422E-01  -.1314125E-01
  -.1280418E-01  -.1013877E-01  -.3940561E-02   .5021528E-02   .1388793E-01
   .2033369E-01   .2466580E-01   .2797349E-01   .2973501E-01   .2907517E-01
   .2708356E-01   .2622510E-01   .2768891E-01   .3051306E-01   .3366861E-01
   .3798341E-01   .4481155E-01   .5390744E-01   .6323114E-01   .7031114E-01
   .7349370E-01   .7229812E-01   .6788374E-01   .6236260E-01   .5750578E-01
   .5434260E-01   .5300541E-01   .5269379E-01   .5252842E-01   .5179808E-01
   .4996826E-01   .4731479E-01   .4459316E-01   .4203876E-01   .3908376E-01
   .3539907E-01   .3172477E-01   .2931902E-01   .2907973E-01   .3104715E-01
   .3394672E-01   .3581631E-01   .3587797E-01   .3565950E-01   .3727444E-01
   .4026538E-01   .4200184E-01   .4112998E-01   .3842436E-01   .3439541E-01
   .2894899E-01   .2274949E-01   .1659491E-01   .1062187E-01   .5270457E-02
   .1422597E-02  -.1018999E-02  -.2965203E-02  -.4234873E-02  -.3492679E-02
   .1490395E-03   .6306159E-02   .1343781E-01   .1934338E-01   .2243243E-01
   .2257580E-01   .2033417E-01   .1565693E-01   .7955075E-02  -.2756586E-02
  -.1541151E-01  -.2878860E-01  -.4221921E-01  -.5520724E-01  -.6719829E-01
  -.7741049E-01  -.8475446E-01  -.8862312E-01  -.8975026E-01  -.8917001E-01
  -.8688600E-01  -.8235815E-01  -.7570798E-01  -.6805420E-01  -.6068488E-01
  -.5426705E-01  -.4823692E-01  -.4144480E-01  -.3357060E-01  -.2525768E-01
  -.1722476E-01  -.1027077E-01  -.5154241E-02  -.1599645E-02   .1328730E-02
   .3883190E-02   .5691935E-02   .7199937E-02   .9897461E-02   .1427796E-01
   .1926930E-01   .2465733E-01   .3144539E-01   .3926066E-01   .4610406E-01
   .5101136E-01   .5515426E-01   .5976321E-01   .6422976E-01   .6688097E-01
   .6664397E-01   .6382368E-01   .5913029E-01   .5273454E-01   .4408189E-01
   .3221210E-01   .1665902E-01  -.1726238E-02  -.2068335E-01  -.3834380E-01
  -.5463938E-01  -.6978674E-01  -.8243636E-01  -.9040944E-01  -.9366604E-01
  -.9476362E-01  -.9665578E-01  -.1005690E+00  -.1053271E+00  -.1090609E+00
  -.1118795E+00  -.1160028E+00  -.1230647E+00  -.1301648E+00  -.1296327E+00
  -.1173941E+00  -.1008108E+00  -.9193803E-01  -.9244665E-01  -.9248931E-01
  -.8619252E-01  -.7908266E-01  -.7770923E-01  -.8040540E-01  -.8163641E-01
  -.7942208E-01  -.7471166E-01  -.6775249E-01  -.5856336E-01  -.4800164E-01
  -.3687420E-01  -.2568119E-01  -.1484704E-01  -.4365995E-02   .5606215E-02
   .1407792E-01   .2023985E-01   .2472759E-01   .2936089E-01   .3558739E-01
   .4313416E-01   .5059526E-01   .5705019E-01   .6263279E-01   .6734998E-01
   .6981544E-01   .6817204E-01   .6227880E-01   .5298327E-01   .4001720E-01
   .2234784E-01   .8747923E-03  -.2046815E-01  -.3736361E-01  -.4857175E-01
  -.5583696E-01  -.6095945E-01  -.6462622E-01  -.6747992E-01  -.7092846E-01
  -.7634371E-01  -.8286778E-01  -.8680752E-01  -.8471587E-01  -.7777910E-01
  -.7097109E-01  -.6760096E-01  -.6746325E-01  -.7003138E-01  -.7490568E-01
  -.7807891E-01  -.7314337E-01  -.5869873E-01  -.4124482E-01  -.2829878E-01
  -.2103111E-01  -.1588506E-01  -.1072895E-01  -.6270174E-02  -.3010468E-02
   .1004445E-03   .3400153E-02   .5488299E-02   .4913211E-02   .2265885E-02
  -.6253202E-03  -.3288774E-02  -.6597890E-02  -.1073750E-01  -.1530885E-01
  -.2018307E-01  -.2479840E-01  -.2826688E-01  -.3093033E-01  -.3428359E-01
  -.3840205E-01  -.4091953E-01  -.4050844E-01  -.3875053E-01  -.3767701E-01
  -.3711629E-01  -.3592405E-01  -.3439331E-01  -.3380248E-01  -.3431869E-01
  -.3512654E-01  -.3659860E-01  -.3977790E-01  -.4422406E-01  -.4796213E-01
  -.4947916E-01  -.4924862E-01  -.4843519E-01  -.4707138E-01  -.4423876E-01
  -.3979626E-01  -.3460295E-01  -.2928240E-01  -.2423932E-01  -.2017671E-01
  -.1717147E-01  -.1370343E-01  -.8397502E-02  -.2585930E-02   .1188858E-02
   .2864058E-02   .5214659E-02   .1019810E-01   .1612145E-01   .2039943E-01
   .2329056E-01   .2698931E-01   .3208597E-01   .3692035E-01   .4013534E-01
   .4165647E-01   .4190262E-01   .4127420E-01   .4028663E-01   .3920566E-01
   .3766379E-01   .3523178E-01   .3205373E-01   .2874481E-01   .2547273E-01
   .2148682E-01   .1620583E-01   .1049021E-01   .5938468E-02   .3139005E-02
   .1259024E-02  -.3990190E-03  -.1516696E-02  -.1457402E-02  -.1763358E-03
   .1890946E-02   .4506824E-02   .7436402E-02   .9869845E-02   .1116678E-01
   .1151084E-01   .1129675E-01   .1033142E-01   .8111494E-02   .5212943E-02
   .3186489E-02   .3001011E-02   .4139332E-02   .5134154E-02   .5252214E-02
   .5111482E-02   .5763013E-02   .7351137E-02   .8848958E-02   .9314619E-02
   .9001721E-02   .8538921E-02   .7745265E-02   .6168008E-02   .3944428E-02
   .1337108E-02  -.1806474E-02  -.5515516E-02  -.9097913E-02  -.1212342E-01
  -.1483447E-01  -.1734485E-01  -.1968695E-01  -.2181415E-01  -.2346031E-01
  -.2424535E-01  -.2401125E-01  -.2297713E-01  -.2121674E-01  -.1908632E-01
  -.1705877E-01  -.1505011E-01  -.1281766E-01  -.1026272E-01  -.7605219E-02
  -.5347104E-02  -.3810881E-02  -.3068667E-02  -.3071626E-02  -.3527563E-02
  -.4180560E-02  -.5151487E-02  -.6874602E-02  -.9255423E-02  -.1167262E-01
  -.1386892E-01  -.1602559E-01  -.1791088E-01  -.1899995E-01  -.1935079E-01
  -.1942382E-01  -.1936940E-01  -.1902907E-01  -.1801006E-01  -.1574068E-01
  -.1246050E-01  -.9454923E-02  -.7822300E-02  -.7546942E-02  -.7589880E-02
  -.6855776E-02  -.5451731E-02  -.4541163E-02  -.4261389E-02  -.3402572E-02
  -.1405122E-02   .9237721E-03   .2813572E-02   .4195715E-02   .5399191E-02
   .6796388E-02   .8808293E-02   .1170546E-01   .1521032E-01   .1913497E-01
   .2333258E-01   .2697829E-01   .2909567E-01   .2963042E-01   .2930726E-01
   .2842482E-01   .2680466E-01   .2475487E-01   .2288100E-01   .2141029E-01
   .2008756E-01   .1859402E-01   .1697095E-01   .1549550E-01   .1416330E-01
   .1291928E-01   .1195855E-01   .1135164E-01   .1079398E-01   .1021256E-01
   .9582352E-02   .8475095E-02   .6414505E-02   .3459431E-02   .1546527E-03
  -.3050768E-02  -.6142218E-02  -.9278539E-02  -.1220134E-01  -.1433016E-01
  -.1541067E-01  -.1539975E-01  -.1472714E-01  -.1429096E-01  -.1428186E-01
  -.1355930E-01  -.1085738E-01  -.6545610E-02  -.2002476E-02   .2029427E-02
   .5877208E-02   .1004076E-01   .1455396E-01   .1913886E-01   .2344629E-01
   .2698405E-01   .2968887E-01   .3161010E-01   .3242353E-01   .3190954E-01
   .3037901E-01   .2860918E-01   .2699713E-01   .2507087E-01   .2188765E-01
   .1701253E-01   .1110415E-01   .5408508E-02   .7884164E-03  -.2709044E-02
  -.5545711E-02  -.8057154E-02  -.1048343E-01  -.1310758E-01  -.1606875E-01
  -.1938747E-01  -.2258144E-01  -.2454878E-01  -.2471691E-01  -.2409830E-01
  -.2394480E-01  -.2394145E-01  -.2338197E-01  -.2246098E-01  -.2140527E-01
  -.1989439E-01  -.1775457E-01  -.1569522E-01  -.1448919E-01  -.1357880E-01
  -.1191708E-01  -.9142076E-02  -.5518637E-02  -.1626502E-02   .1814562E-02
   .4263587E-02   .5957454E-02   .7550933E-02   .9052249E-02   .9730838E-02
   .8960282E-02   .6828372E-02   .3870152E-02   .7439995E-03  -.2606051E-02
  -.6599338E-02  -.1086008E-01  -.1456711E-01  -.1723509E-01  -.1877567E-01
  -.1903529E-01  -.1803226E-01  -.1636463E-01  -.1479008E-01  -.1354197E-01
  -.1174379E-01  -.8581378E-02  -.4619179E-02  -.9529595E-03   .2495325E-02
   .6329421E-02   .1054013E-01   .1440285E-01   .1723918E-01   .1921072E-01
   .2081560E-01   .2211774E-01   .2291510E-01   .2319987E-01   .2338737E-01
   .2401584E-01   .2489182E-01   .2557236E-01   .2631197E-01   .2755558E-01
   .2908703E-01   .3008642E-01   .2988481E-01   .2841732E-01   .2610393E-01
   .2344656E-01   .2043233E-01   .1650992E-01   .1148140E-01   .6008040E-02
   .1250436E-02  -.2118685E-02  -.4382288E-02  -.5965478E-02  -.6567477E-02
  -.5796449E-02  -.3921817E-02  -.1694384E-02   .6889654E-03   .3727888E-02
   .7622488E-02   .1187035E-01   .1594405E-01   .1980314E-01   .2367658E-01
   .2749131E-01   .3075409E-01   .3320423E-01   .3515343E-01   .3657587E-01
   .3698043E-01   .3617244E-01   .3434161E-01   .3174508E-01   .2882186E-01
   .2619306E-01   .2402863E-01   .2146451E-01   .1781839E-01   .1372681E-01
   .9466060E-02   .4250274E-02  -.2575686E-02  -.1049300E-01  -.1805122E-01
  -.2388026E-01  -.2776469E-01  -.3048911E-01  -.3221995E-01  -.3225514E-01
  -.2984995E-01  -.2521497E-01  -.1978539E-01  -.1527751E-01  -.1291090E-01
  -.1308584E-01  -.1491591E-01  -.1711845E-01  -.1904883E-01  -.2082397E-01
  -.2264913E-01  -.2444665E-01  -.2590863E-01  -.2666497E-01  -.2644285E-01
  -.2518723E-01  -.2331529E-01  -.2190320E-01  -.2197246E-01  -.2330550E-01
  -.2491853E-01  -.2617591E-01  -.2709034E-01  -.2774393E-01  -.2797841E-01
  -.2806921E-01  -.2867986E-01  -.2999761E-01  -.3194014E-01  -.3463170E-01
  -.3808003E-01  -.4183535E-01  -.4544694E-01  -.4907604E-01  -.5301090E-01
  -.5668691E-01  -.5896605E-01  -.5950371E-01  -.5875531E-01  -.5702604E-01
  -.5422385E-01  -.5024641E-01  -.4509680E-01  -.3907027E-01  -.3266493E-01
  -.2642250E-01  -.2062516E-01  -.1522454E-01  -.1035942E-01  -.6426476E-02
  -.3456870E-02  -.1325846E-02   .8596056E-04   .8006531E-03   .1039491E-02
   .1156591E-02   .1215450E-02   .1142737E-02   .1002908E-02   .8522762E-03
   .6792262E-03   .3927457E-03   .2132966E-04  -.1905514E-03   .1116814E-03
   .8841461E-03   .1757034E-02   .2716713E-02   .4136707E-02   .6070760E-02
   .8029791E-02   .9401318E-02   .1012369E-01   .1045129E-01   .1039864E-01
   .9832481E-02   .8890118E-02   .7801167E-02   .6583420E-02   .5184300E-02
   .3801161E-02   .2726845E-02   .2136919E-02   .1733658E-02   .1294040E-02
   .8151715E-03   .1892156E-03  -.7978432E-03  -.1941741E-02  -.2639081E-02
  -.2547643E-02  -.1839062E-02  -.7236678E-03   .7435643E-03   .2512017E-02
   .4115756E-02   .5046510E-02   .5328629E-02   .5234030E-02   .4751905E-02
   .4098967E-02   .3777329E-02   .3796192E-02   .3891474E-02   .4045103E-02
   .4635017E-02   .5979493E-02   .7939276E-02   .9864278E-02   .1140176E-01
   .1259461E-01   .1336636E-01   .1321572E-01   .1121855E-01   .7015232E-02
   .1471540E-02  -.4076497E-02  -.8726026E-02  -.1251478E-01  -.1604721E-01
  -.1949151E-01  -.2251467E-01  -.2493596E-01  -.2689139E-01  -.2860138E-01
  -.3019349E-01  -.3148316E-01  -.3210910E-01  -.3191838E-01  -.3126494E-01
  -.3057087E-01  -.2997166E-01  -.2955798E-01  -.2966415E-01  -.3036626E-01
  -.3149249E-01  -.3282208E-01  -.3438087E-01  -.3620731E-01  -.3809412E-01
  -.3961547E-01  -.4070676E-01  -.4135885E-01  -.4097855E-01  -.3901867E-01
  -.3558462E-01  -.3127640E-01  -.2651133E-01  -.2131408E-01  -.1552834E-01
  -.9495860E-02  -.3641994E-02   .2169905E-02   .8251459E-02   .1421977E-01
   .1915344E-01   .2258188E-01   .2486324E-01   .2648053E-01   .2718341E-01
   .2645567E-01   .2417403E-01   .2050462E-01   .1554360E-01   .9609531E-02
   .3364660E-02  -.2750483E-02  -.8907689E-02  -.1494405E-01  -.1996582E-01
  -.2339585E-01  -.2537906E-01  -.2636478E-01  -.2655253E-01  -.2601343E-01
  -.2491569E-01  -.2319134E-01  -.2061150E-01  -.1658228E-01  -.1079877E-01
  -.3849659E-02   .3313958E-02   .9823783E-02   .1514199E-01   .1910440E-01
   .2172839E-01   .2281976E-01   .2251073E-01   .2151449E-01   .2058692E-01
   .1998689E-01   .1955057E-01   .1907370E-01   .1841282E-01   .1755378E-01
   .1659664E-01   .1552920E-01   .1404988E-01   .1188949E-01   .8926495E-02
   .5521582E-02   .2220453E-02  -.7059064E-03  -.3056613E-02  -.4568378E-02
  -.5374721E-02  -.5825891E-02  -.6243614E-02  -.6917254E-02  -.7909086E-02
  -.9111742E-02  -.1038112E-01  -.1140118E-01  -.1192276E-01  -.1226514E-01
  -.1272111E-01  -.1306152E-01  -.1285516E-01  -.1205014E-01  -.1095270E-01
  -.9510248E-02  -.7406638E-02  -.4934248E-02  -.2574116E-02  -.5147282E-03
   .1359843E-02   .3316630E-02   .5207654E-02   .6507933E-02   .7093032E-02
   .7223903E-02   .7060715E-02   .6615203E-02   .5918189E-02   .4937572E-02
   .3595180E-02   .2112112E-02   .6786141E-03  -.9094787E-03  -.3031923E-02
  -.5492596E-02  -.7342881E-02  -.8449926E-02  -.9676249E-02  -.1156985E-01
  -.1390375E-01  -.1621291E-01  -.1809625E-01  -.1931224E-01  -.1933854E-01
  -.1800717E-01  -.1584939E-01  -.1377469E-01  -.1259635E-01  -.1239287E-01
  -.1252387E-01  -.1239929E-01  -.1209746E-01  -.1192105E-01  -.1195399E-01
  -.1210997E-01  -.1213716E-01  -.1180641E-01  -.1086885E-01  -.9094653E-02
  -.6578237E-02  -.3745290E-02  -.1143338E-02   .9324269E-03   .2502303E-02
   .3606951E-02   .4161185E-02   .3953867E-02   .2920564E-02   .1545813E-02
   .4613400E-03  -.3942139E-03  -.1719755E-02  -.3897051E-02  -.6740130E-02
  -.9661250E-02  -.1223139E-01  -.1456579E-01  -.1703978E-01  -.1957790E-01
  -.2187220E-01  -.2381950E-01  -.2561875E-01  -.2757023E-01  -.2937486E-01
  -.3063912E-01  -.3120624E-01  -.3112123E-01  -.3060543E-01  -.2978964E-01
  -.2895237E-01  -.2834184E-01  -.2786059E-01  -.2744453E-01  -.2708075E-01
  -.2662631E-01  -.2595044E-01  -.2504692E-01  -.2387905E-01  -.2203417E-01
  -.1894395E-01  -.1423833E-01  -.8225762E-02  -.1875830E-02   .3585133E-02
   .7556878E-02   .1027199E-01   .1244968E-01   .1472497E-01   .1712044E-01
   .1896175E-01   .1966837E-01   .1964273E-01   .1976558E-01   .1986522E-01
   .1898963E-01   .1663128E-01   .1340633E-01   .1053181E-01   .8462197E-02
   .6145981E-02   .2397829E-02  -.2302625E-02  -.6297848E-02  -.8807306E-02
  -.1030719E-01  -.1139322E-01  -.1215809E-01  -.1219560E-01  -.1125219E-01
  -.9833679E-02  -.8532213E-02  -.7545232E-02  -.6810482E-02  -.6203580E-02
  -.5934079E-02  -.6077399E-02  -.6384081E-02  -.6537278E-02  -.6584177E-02
  -.6712103E-02  -.6998397E-02  -.7097520E-02  -.6366870E-02  -.4480136E-02
  -.1623989E-02   .1663143E-02   .4706528E-02   .7003372E-02   .8426695E-02
   .9670059E-02   .1133541E-01   .1296116E-01   .1372624E-01   .1357632E-01
   .1338271E-01   .1401023E-01   .1515010E-01   .1588609E-01   .1629232E-01
   .1691717E-01   .1771368E-01   .1838551E-01   .1890543E-01   .1953683E-01
   .2079716E-01   .2327751E-01   .2692450E-01   .3070711E-01   .3354057E-01
   .3530387E-01   .3673424E-01   .3810473E-01   .3899095E-01   .3854541E-01
   .3635819E-01   .3294579E-01   .2893185E-01   .2444551E-01   .1991133E-01
   .1610809E-01   .1320976E-01   .1053887E-01   .7563376E-02   .4400422E-02
   .1274425E-02  -.1911867E-02  -.5395572E-02  -.9309563E-02  -.1342735E-01
  -.1730748E-01  -.2050255E-01  -.2268021E-01  -.2391681E-01  -.2457470E-01
  -.2459848E-01  -.2365329E-01  -.2172884E-01  -.1915750E-01  -.1614877E-01
  -.1269161E-01  -.9207149E-02  -.6253392E-02  -.3559063E-02  -.5645714E-03
   .2439016E-02   .4875739E-02   .6513979E-02   .7667747E-02   .8609553E-02
   .9045511E-02   .8625967E-02   .7469924E-02   .6059937E-02   .4971938E-02
   .4773667E-02   .5714421E-02   .7505964E-02   .9415117E-02   .1091870E-01
   .1195825E-01   .1262883E-01   .1284538E-01   .1245863E-01   .1166781E-01
   .1085992E-01   .1014006E-01   .9740594E-02   .1005924E-01   .1133695E-01
   .1339211E-01   .1540221E-01   .1693362E-01   .1852038E-01   .2066066E-01
   .2326036E-01   .2562354E-01   .2681309E-01   .2663015E-01   .2577347E-01
   .2481133E-01   .2368836E-01   .2212446E-01   .2033114E-01   .1873770E-01
   .1733059E-01   .1574079E-01   .1378936E-01   .1187243E-01   .1072848E-01
   .1076155E-01   .1154712E-01   .1246879E-01   .1351641E-01   .1483768E-01
   .1615101E-01   .1721240E-01   .1817687E-01   .1934313E-01   .2070503E-01
   .2175809E-01   .2208812E-01   .2187781E-01   .2154309E-01   .2137371E-01
   .2142892E-01   .2156276E-01   .2150676E-01   .2106463E-01   .2055231E-01
   .2028483E-01   .2004500E-01   .1937029E-01   .1821469E-01   .1694054E-01
   .1578042E-01   .1458768E-01   .1319033E-01   .1145989E-01   .9376206E-02
   .7089593E-02   .4619705E-02   .1835849E-02  -.1495158E-02  -.5396689E-02
  -.9545662E-02  -.1362474E-01  -.1772564E-01  -.2200542E-01  -.2639298E-01
  -.3040086E-01  -.3326346E-01  -.3458540E-01  -.3451344E-01  -.3334054E-01
  -.3147222E-01  -.2962477E-01  -.2831164E-01  -.2748864E-01  -.2653477E-01
  -.2496300E-01  -.2304948E-01  -.2101261E-01  -.1853293E-01  -.1517884E-01
  -.1114695E-01  -.7190361E-02  -.3829695E-02  -.7790984E-03   .2517070E-02
   .5954174E-02   .8961858E-02   .1123146E-01   .1308974E-01   .1498142E-01
   .1745020E-01   .2092745E-01   .2496982E-01   .2858934E-01   .3156542E-01
   .3475031E-01   .3852299E-01   .4214646E-01   .4467513E-01   .4579021E-01
   .4549136E-01   .4318432E-01   .3840025E-01   .3193562E-01   .2496988E-01
   .1825391E-01   .1218530E-01   .6713974E-02   .1562113E-02  -.3251593E-02
  -.7266269E-02  -.9952672E-02  -.1121334E-01  -.1128811E-01  -.1036295E-01
  -.8432957E-02  -.5395496E-02  -.1510904E-02   .2792478E-02   .7206651E-02
   .1153618E-01   .1554522E-01   .1899414E-01   .2148474E-01   .2233152E-01
   .2123913E-01   .1874280E-01   .1567655E-01   .1228366E-01   .8626702E-02
   .5085272E-02   .2201650E-02   .1742252E-03  -.1085726E-02  -.1504949E-02
  -.6037467E-03   .2054514E-02   .6531006E-02   .1215238E-01   .1780537E-01
   .2264830E-01   .2652125E-01   .2986698E-01   .3303094E-01   .3584676E-01
   .3773560E-01   .3841921E-01   .3819775E-01   .3733119E-01   .3536707E-01
   .3183584E-01   .2715718E-01   .2198718E-01   .1651261E-01   .1090634E-01
   .5411219E-02   .2198172E-03  -.4606097E-02  -.8726995E-02  -.1153471E-01
  -.1297377E-01  -.1392834E-01  -.1510678E-01  -.1624063E-01  -.1668201E-01
  -.1610150E-01  -.1467517E-01  -.1281963E-01  -.1087035E-01  -.8567215E-02
  -.5361160E-02  -.1112798E-02   .3517843E-02   .7761786E-02   .1147559E-01
   .1461669E-01   .1700385E-01   .1833829E-01   .1820573E-01   .1610723E-01
   .1173887E-01   .5417020E-02  -.1899569E-02  -.9139569E-02  -.1585138E-01
  -.2223645E-01  -.2840638E-01  -.3402801E-01  -.3867276E-01  -.4232682E-01
  -.4544976E-01  -.4842115E-01  -.5093533E-01  -.5194225E-01  -.5070014E-01
  -.4766330E-01  -.4390859E-01  -.3982833E-01  -.3495257E-01  -.2896236E-01
  -.2242345E-01  -.1644690E-01  -.1160855E-01  -.7708300E-02  -.4362254E-02
  -.1661868E-02   .1455588E-03   .1420592E-02   .3050048E-02   .5425599E-02
   .7504316E-02   .7518061E-02   .4852527E-02   .8390558E-03  -.3018951E-02
  -.6927473E-02  -.1180328E-01  -.1712274E-01  -.2171179E-01  -.2562066E-01
  -.2973385E-01  -.3384528E-01  -.3658642E-01  -.3704123E-01  -.3563932E-01
  -.3345132E-01  -.3091116E-01  -.2828312E-01  -.2600431E-01  -.2394928E-01
  -.2144177E-01  -.1832159E-01  -.1526026E-01  -.1280779E-01  -.1043172E-01
  -.7151300E-02  -.2954996E-02   .9430671E-03   .3891067E-02   .6836623E-02
   .1073275E-01   .1481576E-01   .1712772E-01   .1702560E-01   .1565445E-01
   .1419860E-01   .1285776E-01   .1136710E-01   .9654311E-02   .7856969E-02
   .5965014E-02   .4447041E-02   .4241593E-02   .5599141E-02   .7357448E-02
   .7975437E-02   .7118865E-02   .5844253E-02   .5231473E-02   .5358668E-02
   .5871457E-02   .6537969E-02   .7226926E-02   .8177082E-02   .9831765E-02
   .1172935E-01   .1226015E-01   .1091365E-01   .9342029E-02   .9031664E-02
   .9437772E-02   .9503928E-02   .9909651E-02   .1175934E-01   .1448016E-01
   .1667924E-01   .1804154E-01   .1919688E-01   .2037175E-01   .2142012E-01
   .2250751E-01   .2394014E-01   .2550408E-01   .2670326E-01   .2793557E-01
   .2990700E-01   .3280447E-01   .3614193E-01   .3911805E-01   .4128076E-01
   .4281803E-01   .4397663E-01   .4463367E-01   .4440838E-01   .4308755E-01
   .4058853E-01   .3669167E-01   .3121205E-01   .2431426E-01   .1658440E-01
   .8401534E-02  -.4051379E-03  -.1015879E-01  -.2081729E-01  -.3176210E-01
  -.4207883E-01  -.5088878E-01  -.5786945E-01  -.6340289E-01  -.6811685E-01
  -.7211884E-01  -.7482903E-01  -.7565572E-01  -.7451986E-01  -.7207178E-01
  -.6899006E-01  -.6511661E-01  -.5984740E-01  -.5272574E-01  -.4383722E-01
  -.3405841E-01  -.2479975E-01  -.1710826E-01  -.1121660E-01  -.6780836E-02
  -.3151615E-02  -.5738672E-04   .2182084E-02   .2998157E-02   .1870561E-02
  -.1225657E-02  -.5541673E-02  -.9952006E-02  -.1329122E-01  -.1488813E-01
  -.1516147E-01  -.1490280E-01  -.1412382E-01  -.1247021E-01  -.1046873E-01
  -.9308566E-02  -.9229462E-02  -.8901178E-02  -.6942340E-02  -.3447510E-02
   .1282590E-03   .2551702E-02   .3652833E-02   .3894425E-02   .3713800E-02
   .3095798E-02   .1954421E-02  -.2647102E-05  -.2982329E-02  -.6523595E-02
  -.9595916E-02  -.1139976E-01  -.1238071E-01  -.1337413E-01  -.1468333E-01
  -.1656071E-01  -.1959883E-01  -.2414081E-01  -.2944718E-01  -.3394925E-01
  -.3589156E-01  -.3413743E-01  -.2914873E-01  -.2292303E-01  -.1759577E-01
  -.1429217E-01  -.1246856E-01  -.1040263E-01  -.7247979E-02  -.4022874E-02
  -.2286809E-02  -.2599289E-02  -.4388687E-02  -.6610477E-02  -.8812820E-02
  -.1135819E-01  -.1482255E-01  -.1932256E-01  -.2452124E-01  -.2973139E-01
  -.3374009E-01  -.3560712E-01  -.3546637E-01  -.3380422E-01  -.3052692E-01
  -.2534576E-01  -.1891649E-01  -.1262926E-01  -.7339458E-02  -.3115359E-02
   .7759548E-05   .2006699E-02   .3044584E-02   .3279907E-02   .2939220E-02
   .2398405E-02   .2271041E-02   .3174589E-02   .5306949E-02   .8191615E-02
   .1113808E-01   .1370363E-01   .1572795E-01   .1725331E-01   .1840446E-01
   .1903092E-01   .1914105E-01   .1923724E-01   .1977757E-01   .2067068E-01
   .2109303E-01   .2027166E-01   .1861767E-01   .1706644E-01   .1592569E-01
   .1502383E-01   .1439117E-01   .1449905E-01   .1573007E-01   .1784608E-01
   .2006723E-01   .2179940E-01   .2294195E-01   .2333405E-01   .2265996E-01
   .2070821E-01   .1741138E-01   .1331166E-01   .9253516E-02   .5423359E-02
   .1390688E-02  -.2854554E-02  -.6474338E-02  -.8560973E-02  -.8904948E-02
  -.7804850E-02  -.5717162E-02  -.3306989E-02  -.1395337E-02  -.5137550E-03
  -.4682350E-03  -.7655845E-03  -.1247205E-02  -.2124860E-02  -.3705034E-02
  -.5953332E-02  -.8607866E-02  -.1123069E-01  -.1362440E-01  -.1607929E-01
  -.1892239E-01  -.2202711E-01  -.2482261E-01  -.2692470E-01  -.2839637E-01
  -.2956765E-01  -.3085578E-01  -.3229591E-01  -.3391602E-01  -.3594379E-01
  -.3824824E-01  -.4028032E-01  -.4155293E-01  -.4198127E-01  -.4163702E-01
  -.4040890E-01  -.3845842E-01  -.3612998E-01  -.3372430E-01  -.3148163E-01
  -.2939137E-01  -.2734490E-01  -.2528341E-01  -.2326909E-01  -.2116343E-01
  -.1861518E-01  -.1550279E-01  -.1203833E-01  -.8571808E-02  -.4993953E-02
  -.9908359E-03   .3569314E-02   .8444236E-02   .1340908E-01   .1826661E-01
   .2261758E-01   .2630910E-01   .2946833E-01   .3224255E-01   .3462452E-01
   .3641970E-01   .3712757E-01   .3620397E-01   .3367651E-01   .3030277E-01
   .2694921E-01   .2403634E-01   .2151642E-01   .1927157E-01   .1777414E-01
   .1762151E-01   .1893683E-01   .2140644E-01   .2465935E-01   .2817517E-01
   .3122797E-01   .3357314E-01   .3524509E-01   .3638042E-01   .3703171E-01
   .3694561E-01   .3616524E-01   .3483878E-01   .3316501E-01   .3145195E-01
   .2991667E-01   .2853813E-01   .2707239E-01   .2521265E-01   .2329544E-01
   .2197516E-01   .2137497E-01   .2096870E-01   .2031213E-01   .1913803E-01
   .1743173E-01   .1557091E-01   .1379634E-01   .1175192E-01   .8976819E-02
   .5813873E-02   .3375330E-02   .2585617E-02   .3489086E-02   .5504025E-02
   .8002705E-02   .1095732E-01   .1460750E-01   .1890060E-01   .2349072E-01
   .2805168E-01   .3233865E-01   .3577224E-01   .3799822E-01   .3918874E-01
   .3986102E-01   .4056967E-01   .4145423E-01   .4212008E-01   .4239073E-01
   .4234765E-01   .4193649E-01   .4098286E-01   .3980011E-01   .3888704E-01
   .3813737E-01   .3716694E-01   .3598920E-01   .3495416E-01   .3448920E-01
   .3486770E-01   .3584994E-01   .3668530E-01   .3697019E-01   .3688983E-01
   .3695295E-01   .3723311E-01   .3740083E-01   .3706373E-01   .3593016E-01
   .3419723E-01   .3265395E-01   .3208130E-01   .3233291E-01   .3265836E-01
   .3270336E-01   .3241081E-01   .3161354E-01   .3012244E-01   .2768258E-01
   .2406150E-01   .1920408E-01   .1326691E-01   .6732401E-02   .2873768E-03
  -.5366380E-02  -.9969621E-02  -.1382799E-01  -.1706866E-01  -.1924259E-01
  -.2006365E-01  -.2013679E-01  -.2031585E-01  -.2082621E-01  -.2134041E-01
  -.2145093E-01  -.2113565E-01  -.2045557E-01  -.1948858E-01  -.1850940E-01
  -.1790758E-01  -.1792239E-01  -.1825296E-01  -.1845264E-01  -.1834382E-01
  -.1810494E-01  -.1815221E-01  -.1857675E-01  -.1867844E-01  -.1786963E-01
  -.1641687E-01  -.1476699E-01  -.1267675E-01  -.9618512E-02  -.5502798E-02
  -.8655830E-03   .3885424E-02   .9071168E-02   .1511364E-01   .2161294E-01
   .2743493E-01   .3159212E-01   .3401242E-01   .3515245E-01   .3541028E-01
   .3494758E-01   .3392782E-01   .3248019E-01   .3061624E-01   .2854871E-01
   .2645076E-01   .2417014E-01   .2182933E-01   .1991497E-01   .1876917E-01
   .1829014E-01   .1816253E-01   .1838881E-01   .1911643E-01   .1995217E-01
   .2028331E-01   .2052836E-01   .2174255E-01   .2427429E-01   .2711857E-01
   .2862909E-01   .2803832E-01   .2585346E-01   .2336621E-01   .2151628E-01
   .2006990E-01   .1802075E-01   .1520808E-01   .1291902E-01   .1218747E-01
   .1244516E-01   .1228510E-01   .1105388E-01   .9456212E-02   .8568769E-02
   .8386691E-02   .8020725E-02   .6630203E-02   .3933254E-02   .4362851E-03
  -.2810085E-02  -.4883093E-02  -.5565047E-02  -.4992810E-02  -.3145174E-02
  -.1924856E-03   .2578610E-02   .3195995E-02   .1392754E-02  -.1005811E-02
  -.2408392E-02  -.3034705E-02  -.3943655E-02  -.5647323E-02  -.7694140E-02
  -.9074117E-02  -.8718674E-02  -.6161842E-02  -.2051235E-02   .2116520E-02
   .5582723E-02   .8826789E-02   .1238597E-01   .1592894E-01   .1851505E-01
   .1977822E-01   .2038869E-01   .2128366E-01   .2281853E-01   .2453848E-01
   .2579941E-01   .2588330E-01   .2458075E-01   .2248586E-01   .2039503E-01
   .1847911E-01   .1606516E-01   .1257474E-01   .8337948E-02   .4366518E-02
   .1656631E-02   .8743288E-03   .1881372E-02   .4085150E-02   .6847422E-02
   .9545955E-02   .1146867E-01   .1215891E-01   .1176389E-01   .1029923E-01
   .7470209E-02   .3774318E-02   .2997049E-03  -.3247361E-02  -.8251580E-02
  -.1459209E-01  -.2019320E-01  -.2355552E-01  -.2453179E-01  -.2387515E-01
  -.2327228E-01  -.2374095E-01  -.2391234E-01  -.2228299E-01  -.2085235E-01
  -.2307078E-01  -.2829618E-01  -.3157191E-01  -.3010181E-01  -.2712453E-01
  -.2689201E-01  -.2808919E-01  -.2625572E-01  -.2083860E-01  -.1462709E-01
  -.8701397E-02  -.3225970E-02  -.4035611E-03  -.8175648E-03  -.1428479E-03
   .5515413E-02   .1362501E-01   .1928836E-01   .2240553E-01   .2626552E-01
   .3113064E-01   .3439124E-01   .3524166E-01   .3480114E-01   .3346965E-01
   .3156998E-01   .3086538E-01   .3243605E-01   .3463209E-01   .3536548E-01
   .3488778E-01   .3462224E-01   .3421042E-01   .3213357E-01   .2818205E-01
   .2359689E-01   .1887477E-01   .1350707E-01   .7868410E-02   .3246930E-02
  -.1904735E-03  -.3767513E-02  -.8184854E-02  -.1214101E-01  -.1377866E-01
  -.1326858E-01  -.1249726E-01  -.1269090E-01  -.1328058E-01  -.1330518E-01
  -.1276180E-01  -.1174842E-01  -.9611663E-02  -.6012971E-02  -.2364003E-02
  -.1454383E-03   .9893669E-03   .2484317E-02   .4827756E-02   .7152027E-02
   .8416812E-02   .8292770E-02   .7331862E-02   .6280415E-02   .5164159E-02
   .2873764E-02  -.1698757E-02  -.7775520E-02  -.1241129E-01  -.1353665E-01
  -.1304165E-01  -.1473415E-01  -.1951575E-01  -.2417652E-01  -.2552518E-01
  -.2339007E-01  -.1905154E-01  -.1310304E-01  -.5389514E-02   .3968232E-02
   .1371309E-01   .2156622E-01   .2496637E-01   .2300474E-01   .1727808E-01
   .1056691E-01   .4905859E-02   .7698782E-03  -.2530245E-02  -.6229255E-02
  -.1113708E-01  -.1650356E-01  -.2074172E-01  -.2358795E-01  -.2684425E-01
  -.3183966E-01  -.3737161E-01  -.4103196E-01  -.4215337E-01  -.4205330E-01
  -.4167660E-01  -.4053363E-01  -.3784808E-01  -.3366867E-01  -.2849901E-01
  -.2284458E-01  -.1708156E-01  -.1143236E-01  -.6536123E-02  -.3444959E-02
  -.2901565E-02  -.4620275E-02  -.6916553E-02  -.8201228E-02  -.8795588E-02
  -.1069581E-01  -.1516715E-01  -.2166342E-01  -.2861485E-01  -.3424591E-01
  -.3771766E-01  -.4019872E-01  -.4343705E-01  -.4756144E-01  -.5108097E-01
  -.5288621E-01  -.5349495E-01  -.5444866E-01  -.5666502E-01  -.5950121E-01
  -.6154368E-01  -.6183002E-01  -.6059863E-01  -.5895011E-01  -.5817620E-01
  -.5855524E-01  -.5915420E-01  -.5941218E-01  -.5949157E-01  -.5952820E-01
  -.5931257E-01  -.5859359E-01  -.5747339E-01  -.5609350E-01  -.5432137E-01
  -.5202504E-01  -.4931291E-01  -.4663921E-01  -.4468660E-01  -.4346433E-01
  -.4200010E-01  -.3960975E-01  -.3673334E-01  -.3415786E-01  -.3187014E-01
  -.2860754E-01  -.2239615E-01  -.1211488E-01   .1429939E-02   .1549277E-01
   .2680136E-01   .3376612E-01   .3692826E-01   .3775013E-01   .3685233E-01
   .3402231E-01   .2979600E-01   .2592575E-01   .2430029E-01   .2596252E-01
   .2994882E-01   .3287170E-01   .3157955E-01   .2626691E-01   .2084330E-01
   .1942615E-01   .2211924E-01   .2484430E-01   .2311953E-01   .1648189E-01
   .8829853E-02   .4134321E-02   .2990223E-02   .2899050E-02   .1209899E-02
  -.2817778E-02  -.8284642E-02  -.1387523E-01  -.1912429E-01  -.2423444E-01
  -.2927624E-01  -.3392923E-01  -.3785451E-01  -.4091697E-01  -.4330035E-01
  -.4503525E-01  -.4564871E-01  -.4481128E-01  -.4282102E-01  -.4062807E-01
  -.3915779E-01  -.3846592E-01  -.3741053E-01  -.3437933E-01  -.2885395E-01
  -.2211531E-01  -.1581577E-01  -.1012360E-01  -.4015383E-02   .3321413E-02
   .1178794E-01   .2080589E-01   .2965507E-01   .3760920E-01   .4380869E-01
   .4797901E-01   .5073451E-01   .5256322E-01   .5312169E-01   .5203646E-01
   .4945321E-01   .4573047E-01   .4140689E-01   .3748102E-01   .3479444E-01
   .3323143E-01   .3214439E-01   .3139310E-01   .3119464E-01   .3126875E-01
   .3085574E-01   .2953891E-01   .2751701E-01   .2512132E-01   .2270995E-01
   .2037846E-01   .1770034E-01   .1416457E-01   .9691493E-02   .4785931E-02
  -.2236631E-03  -.5718648E-02  -.1179198E-01  -.1754243E-01  -.2208329E-01
  -.2525009E-01  -.2707792E-01  -.2767559E-01  -.2720064E-01  -.2561610E-01
  -.2287719E-01  -.1927202E-01  -.1546387E-01  -.1234956E-01  -.1091312E-01
  -.1128551E-01  -.1194841E-01  -.1095867E-01  -.8086553E-02  -.4974424E-02
  -.3609758E-02  -.4863958E-02  -.8137280E-02  -.1243569E-01  -.1719483E-01
  -.2187715E-01  -.2561059E-01  -.2761970E-01  -.2790164E-01  -.2683393E-01
  -.2439273E-01  -.2047402E-01  -.1578797E-01  -.1132767E-01  -.7131433E-02
  -.2493342E-02   .2779762E-02   .8305855E-02   .1399267E-01   .2032649E-01
   .2757152E-01   .3499353E-01   .4165379E-01   .4715409E-01   .5130586E-01
   .5381738E-01   .5418251E-01   .5237669E-01   .4894569E-01   .4433224E-01
   .3838345E-01   .3059350E-01   .2099228E-01   .1080604E-01   .1827008E-02
  -.5203724E-02  -.1070000E-01  -.1553689E-01  -.2034749E-01  -.2516875E-01
  -.2902220E-01  -.3020501E-01  -.2810772E-01  -.2367846E-01  -.1819257E-01
  -.1229333E-01  -.6455373E-02  -.1482085E-02   .1930766E-02   .3600066E-02
   .4398367E-02   .5325606E-02   .6485689E-02   .7286855E-02   .7538696E-02
   .7846915E-02   .8872273E-02   .1060618E-01   .1299768E-01   .1625253E-01
   .1993197E-01   .2342274E-01   .2661498E-01   .2995977E-01   .3380689E-01
   .3774473E-01   .4101444E-01   .4312265E-01   .4408258E-01   .4398313E-01
   .4273656E-01   .4035988E-01   .3746968E-01   .3447792E-01   .3105774E-01
   .2716179E-01   .2356884E-01   .2074623E-01   .1803549E-01   .1462572E-01
   .1043503E-01   .5855287E-02   .1085521E-02  -.3739871E-02  -.8303303E-02
  -.1238608E-01  -.1603012E-01  -.1908834E-01  -.2129143E-01  -.2257934E-01
  -.2340930E-01  -.2423552E-01  -.2496458E-01  -.2569585E-01  -.2688438E-01
  -.2843515E-01  -.2956351E-01  -.3005087E-01  -.3044243E-01  -.3095620E-01
  -.3166558E-01  -.3282374E-01  -.3440528E-01  -.3599219E-01  -.3720991E-01
  -.3839986E-01  -.4024502E-01  -.4257023E-01  -.4458145E-01  -.4602488E-01
  -.4702775E-01  -.4755559E-01  -.4775031E-01  -.4800660E-01  -.4857513E-01
  -.4904199E-01  -.4843859E-01  -.4657041E-01  -.4419878E-01  -.4144034E-01
  -.3729015E-01  -.3104820E-01  -.2332693E-01  -.1553108E-01  -.8566688E-02
  -.2457398E-02   .2962432E-02   .7427929E-02   .1078552E-01   .1350063E-01
   .1603364E-01   .1821703E-01   .1964409E-01   .2044036E-01   .2101853E-01
   .2166861E-01   .2245423E-01   .2294326E-01   .2257055E-01   .2123037E-01
   .1937368E-01   .1750451E-01   .1590732E-01   .1466787E-01   .1378244E-01
   .1323538E-01   .1299340E-01   .1296483E-01   .1323275E-01   .1396124E-01
   .1499328E-01   .1599556E-01   .1707206E-01   .1852666E-01   .2011405E-01
   .2121089E-01   .2176381E-01   .2228636E-01   .2267877E-01   .2253646E-01
   .2143683E-01   .1881748E-01   .1439632E-01   .8596738E-02   .2286895E-02
  -.3426870E-02  -.7933220E-02  -.1187096E-01  -.1605763E-01  -.2049904E-01
  -.2429517E-01  -.2675782E-01  -.2821733E-01  -.2934474E-01  -.3073278E-01
  -.3230669E-01  -.3355503E-01  -.3415333E-01  -.3422262E-01  -.3395233E-01
  -.3334816E-01  -.3240814E-01  -.3130482E-01  -.3023927E-01  -.2932263E-01
  -.2857841E-01  -.2782357E-01  -.2684062E-01  -.2563930E-01  -.2435055E-01
  -.2319461E-01  -.2227365E-01  -.2151089E-01  -.2069445E-01  -.1970759E-01
  -.1867325E-01  -.1766240E-01  -.1669980E-01  -.1557067E-01  -.1410059E-01
  -.1246155E-01  -.1084562E-01  -.9376025E-02  -.8171137E-02  -.7317608E-02
  -.6777982E-02  -.6548053E-02  -.6577157E-02  -.7000841E-02  -.7619548E-02
  -.7999150E-02  -.8266100E-02  -.8594654E-02  -.9035256E-02  -.9748190E-02
  -.1087463E-01  -.1238072E-01  -.1417256E-01  -.1604970E-01  -.1760521E-01
  -.1853543E-01  -.1879760E-01  -.1839403E-01  -.1718767E-01  -.1492602E-01
  -.1156430E-01  -.7719347E-02  -.4171386E-02  -.1051675E-02   .1909788E-02
   .4642979E-02   .6839183E-02   .8397993E-02   .9259855E-02   .9206679E-02
   .8277636E-02   .6774525E-02   .4887730E-02   .2663525E-02   .4315850E-03
  -.1298266E-02  -.2367927E-02  -.2731942E-02  -.2138251E-02  -.3320870E-03
   .2534458E-02   .5772180E-02   .8631635E-02   .1090999E-01   .1267743E-01
   .1355723E-01   .1316798E-01   .1208800E-01   .1135111E-01   .1107106E-01
   .1036108E-01   .9000499E-02   .7694757E-02   .7090675E-02   .7136836E-02
   .7433615E-02   .7883738E-02   .8700235E-02   .1027734E-01   .1276830E-01
   .1576119E-01   .1864236E-01   .2112702E-01   .2324131E-01   .2506625E-01
   .2660219E-01   .2766281E-01   .2778135E-01   .2673547E-01   .2494605E-01
   .2308429E-01   .2142273E-01   .2002276E-01   .1921623E-01   .1929222E-01
   .2019582E-01   .2162898E-01   .2336103E-01   .2522521E-01   .2700802E-01
   .2887038E-01   .3083202E-01   .3270648E-01   .3438635E-01   .3560817E-01
   .3597131E-01   .3534740E-01   .3399381E-01   .3217036E-01   .3004883E-01
   .2801986E-01   .2670044E-01   .2626495E-01   .2628131E-01   .2613650E-01
   .2559502E-01   .2452515E-01   .2257221E-01   .1914032E-01   .1408582E-01
   .7922489E-02   .1285358E-02  -.5362908E-02  -.1188059E-01  -.1778506E-01
  -.2245057E-01  -.2568087E-01  -.2758227E-01  -.2828007E-01  -.2792912E-01
  -.2665265E-01  -.2468984E-01  -.2237239E-01  -.1955110E-01  -.1580157E-01
  -.1114639E-01  -.6169601E-02  -.1672659E-02   .2119731E-02   .5432829E-02
   .8250140E-02   .1026792E-01   .1142422E-01   .1212764E-01   .1280495E-01
   .1375898E-01   .1519587E-01   .1698053E-01   .1857855E-01   .1955017E-01
   .1989774E-01   .2012545E-01   .2064071E-01   .2123510E-01   .2127101E-01
   .2041222E-01   .1923588E-01   .1887757E-01   .1976113E-01   .2136534E-01
   .2302593E-01   .2444929E-01   .2562602E-01   .2630309E-01   .2612949E-01
   .2527245E-01   .2395888E-01   .2210191E-01   .1972136E-01   .1704076E-01
   .1437643E-01   .1204107E-01   .1035821E-01   .9504562E-02   .9512573E-02
   .1005425E-01   .1056683E-01   .1078229E-01   .1088990E-01   .1100047E-01
   .1120567E-01   .1148979E-01   .1167099E-01   .1175908E-01   .1182902E-01
   .1160498E-01   .1063090E-01   .8697428E-02   .5830839E-02   .2280241E-02
  -.1223686E-02  -.3862835E-02  -.5117742E-02  -.4993343E-02  -.3793340E-02
  -.2073204E-02  -.4377884E-03   .9273135E-03   .2585251E-02   .4938319E-02
   .7471631E-02   .9284571E-02   .1035574E-01   .1150880E-01   .1308670E-01
   .1439394E-01   .1460463E-01   .1399749E-01   .1320605E-01   .1220967E-01
   .1063493E-01   .8874196E-02   .7476600E-02   .6363259E-02   .5150498E-02
   .3778332E-02   .2549210E-02   .1772656E-02   .1430287E-02   .1256019E-02
   .1171187E-02   .1299684E-02   .1281413E-02   .5365006E-03  -.8465963E-03
  -.2069165E-02  -.2544016E-02  -.2181395E-02  -.1064598E-02   .5958675E-03
   .2429644E-02   .3862149E-02   .4329400E-02   .4052369E-02   .3944536E-02
   .4285048E-02   .4491909E-02   .4016831E-02   .3055112E-02   .2298308E-02
   .2066825E-02   .2393191E-02   .3233126E-02   .4685235E-02   .7064949E-02
   .1035196E-01   .1381943E-01   .1666201E-01   .1834722E-01   .1865082E-01
   .1772700E-01   .1601201E-01   .1388445E-01   .1146441E-01   .8764989E-02
   .5629408E-02   .2124252E-02  -.1472839E-02  -.5023494E-02  -.8518120E-02
  -.1199278E-01  -.1542973E-01  -.1876935E-01  -.2188915E-01  -.2474246E-01
  -.2724275E-01  -.2917114E-01  -.3030740E-01  -.3062711E-01  -.3039484E-01
  -.3011264E-01  -.3019816E-01  -.3088552E-01  -.3199692E-01  -.3308813E-01
  -.3367384E-01  -.3338817E-01  -.3193217E-01  -.2932192E-01  -.2625460E-01
  -.2356726E-01  -.2150614E-01  -.1986564E-01  -.1885420E-01  -.1901373E-01
  -.2022047E-01  -.2156304E-01  -.2236703E-01  -.2261013E-01  -.2239385E-01
  -.2126921E-01  -.1879967E-01  -.1528369E-01  -.1124208E-01  -.7021410E-02
  -.2990448E-02   .8308959E-03   .4480149E-02   .7976780E-02   .1125124E-01
   .1393872E-01   .1583839E-01   .1730114E-01   .1853029E-01   .1911791E-01
   .1845778E-01   .1659996E-01   .1418706E-01   .1172348E-01   .9193166E-02
   .6188361E-02   .2506925E-02  -.1391144E-02  -.5105068E-02  -.8473383E-02
  -.1148291E-01  -.1436607E-01  -.1739956E-01  -.2055286E-01  -.2375313E-01
  -.2690049E-01  -.2990724E-01  -.3263691E-01  -.3500999E-01  -.3689782E-01
  -.3818323E-01  -.3892809E-01  -.3919592E-01  -.3925540E-01  -.3941952E-01
  -.3949175E-01  -.3909353E-01  -.3810782E-01  -.3665304E-01  -.3497594E-01
  -.3305309E-01  -.3068078E-01  -.2710573E-01  -.2139815E-01  -.1365027E-01
  -.4682174E-02   .4667573E-02   .1339270E-01   .2071745E-01   .2673795E-01
   .3229987E-01   .3766414E-01   .4198571E-01   .4448088E-01   .4501709E-01
   .4388645E-01   .4148476E-01   .3799220E-01   .3367490E-01   .2919066E-01
   .2499645E-01   .2080331E-01   .1628597E-01   .1171192E-01   .7909339E-02
   .5619508E-02   .4823348E-02   .4921272E-02   .5670517E-02   .7094680E-02
   .8876452E-02   .1051801E-01   .1168266E-01   .1228458E-01   .1221939E-01
   .1161342E-01   .1088439E-01   .1021024E-01   .9345906E-02   .8090266E-02
   .6571393E-02   .4892848E-02   .2946041E-02   .7483850E-03  -.1370687E-02
  -.3229182E-02  -.4851992E-02  -.6528310E-02  -.8281283E-02  -.9555464E-02
  -.9538800E-02  -.7921730E-02  -.5244307E-02  -.2346551E-02   .4765176E-03
   .3389423E-02   .6186094E-02   .8234064E-02   .9027616E-02   .8378737E-02
   .6399797E-02   .3781067E-02   .1652792E-02   .2331441E-03  -.1743182E-02
  -.5469764E-02  -.1017123E-01  -.1399361E-01  -.1649337E-01  -.1877763E-01
  -.2142301E-01  -.2373321E-01  -.2531011E-01  -.2659839E-01  -.2811026E-01
  -.2954962E-01  -.3011544E-01  -.2930696E-01  -.2720431E-01  -.2430422E-01
  -.2107317E-01  -.1782364E-01  -.1471995E-01  -.1176325E-01  -.8758716E-02
  -.5370283E-02  -.1345277E-02   .3067843E-02   .7542421E-02   .1205689E-01
   .1651355E-01   .2056999E-01   .2365080E-01   .2472953E-01   .2285440E-01
   .1808098E-01   .1119434E-01   .2932152E-02  -.5244487E-02  -.1113990E-01
  -.1409871E-01  -.1578049E-01  -.1798012E-01  -.2064908E-01  -.2174945E-01
  -.1899919E-01  -.1269911E-01  -.6480650E-02  -.3864245E-02  -.4256517E-02
  -.3954520E-02  -.1357543E-02   .1287530E-02   .1965165E-02   .2088961E-02
   .3890881E-02   .6841049E-02   .8753387E-02   .9296681E-02   .9996810E-02
   .1156159E-01   .1325714E-01   .1456962E-01   .1584349E-01   .1713194E-01
   .1774946E-01   .1740741E-01   .1665022E-01   .1590663E-01   .1518325E-01
   .1479024E-01   .1525103E-01   .1609235E-01   .1595349E-01   .1447604E-01
   .1274367E-01   .1227418E-01   .1355929E-01   .1594837E-01   .1854885E-01
   .2100534E-01   .2324015E-01   .2501843E-01   .2623011E-01   .2738450E-01
   .2917844E-01   .3177830E-01   .3444193E-01   .3629762E-01   .3691958E-01
   .3630678E-01   .3476082E-01   .3289104E-01   .3099042E-01   .2864720E-01
   .2581895E-01   .2333762E-01   .2201931E-01   .2144226E-01   .2027419E-01
   .1794682E-01   .1549612E-01   .1456678E-01   .1531924E-01   .1637893E-01
   .1644018E-01   .1531794E-01   .1379965E-01   .1265840E-01   .1186170E-01
   .1112454E-01   .1074413E-01   .1155207E-01   .1369351E-01   .1622666E-01
   .1812505E-01   .1912092E-01   .1937005E-01   .1900347E-01   .1828235E-01
   .1740270E-01   .1608686E-01   .1364513E-01   .9681767E-02   .4577251E-02
  -.6671976E-03  -.5227609E-02  -.8922119E-02  -.1214535E-01  -.1526354E-01
  -.1825692E-01  -.2104633E-01  -.2362726E-01  -.2613020E-01  -.2861647E-01
  -.3080585E-01  -.3249493E-01  -.3395456E-01  -.3565527E-01  -.3786847E-01
  -.4012275E-01  -.4132486E-01  -.4086935E-01  -.3936739E-01  -.3790610E-01
  -.3679787E-01  -.3556785E-01  -.3414700E-01  -.3336327E-01  -.3356808E-01
  -.3398075E-01  -.3368362E-01  -.3266394E-01  -.3159504E-01  -.3079191E-01
  -.3003602E-01  -.2864471E-01  -.2621844E-01  -.2325822E-01  -.2041825E-01
  -.1753951E-01  -.1428088E-01  -.1093118E-01  -.7912621E-02  -.5268458E-02
  -.2931272E-02  -.1261758E-02  -.5888567E-03  -.3964637E-03   .3286090E-03
   .1851612E-02   .3288568E-02   .3721062E-02   .3496740E-02   .3343192E-02
   .3307950E-02   .2970906E-02   .1930211E-02   .1145574E-03  -.2116996E-02
  -.4477231E-02  -.6948359E-02  -.9427288E-02  -.1159810E-01  -.1328598E-01
  -.1462253E-01  -.1569739E-01  -.1638896E-01  -.1646038E-01  -.1603873E-01
  -.1553102E-01  -.1535897E-01  -.1581708E-01  -.1687707E-01  -.1799889E-01
  -.1866857E-01  -.1895582E-01  -.1923090E-01  -.1948874E-01  -.1904341E-01
  -.1694281E-01  -.1339112E-01  -.1014143E-01  -.8894868E-02  -.9509343E-02
  -.1006688E-01  -.8996102E-02  -.6552081E-02  -.4432826E-02  -.3940553E-02
  -.4721912E-02  -.5519676E-02  -.5847754E-02  -.6067501E-02  -.6237532E-02
  -.5996551E-02  -.5299097E-02  -.4456406E-02  -.3657748E-02  -.2841106E-02
  -.1743841E-02  -.7396645E-03  -.6073314E-03  -.1915613E-02  -.4639394E-02
  -.8011322E-02  -.1088567E-01  -.1293424E-01  -.1485502E-01  -.1752256E-01
  -.2075984E-01  -.2321213E-01  -.2339748E-01  -.2084407E-01  -.1631740E-01
  -.1157757E-01  -.7946077E-02  -.5241628E-02  -.2417047E-02   .1016196E-02
   .4734758E-02   .8275487E-02   .1148011E-01   .1441941E-01   .1741168E-01
   .2068039E-01   .2387440E-01   .2656049E-01   .2879145E-01   .3059603E-01
   .3170262E-01   .3225820E-01   .3267275E-01   .3330085E-01   .3420369E-01
   .3494327E-01   .3499551E-01   .3412884E-01   .3248940E-01   .3037328E-01
   .2794626E-01   .2512160E-01   .2173857E-01   .1802862E-01   .1460758E-01
   .1180103E-01   .9454542E-02   .7275453E-02   .5186102E-02   .2990440E-02
   .4392907E-03  -.2538177E-02  -.5321562E-02  -.6976706E-02  -.7246372E-02
  -.6597013E-02  -.5570970E-02  -.4220496E-02  -.2473891E-02  -.4350503E-03
   .1833056E-02   .4427101E-02   .7196062E-02   .9783582E-02   .1193541E-01
   .1352451E-01   .1450683E-01   .1486132E-01   .1421878E-01   .1240610E-01
   .1002029E-01   .8083798E-02   .7087600E-02   .6814188E-02   .6994832E-02
   .7656952E-02   .8818055E-02   .1062733E-01   .1306424E-01   .1592112E-01
   .1910967E-01   .2212446E-01   .2440606E-01   .2586520E-01   .2701334E-01
   .2834591E-01   .3015049E-01   .3208502E-01   .3363510E-01   .3476432E-01
   .3542760E-01   .3564283E-01   .3553017E-01   .3513026E-01   .3449233E-01
   .3378305E-01   .3310717E-01   .3250851E-01   .3191945E-01   .3144586E-01
   .3119338E-01   .3113389E-01   .3111341E-01   .3095157E-01   .3052756E-01
   .2977032E-01   .2870154E-01   .2709048E-01   .2454326E-01   .2088860E-01
   .1629389E-01   .1128206E-01   .6673254E-02   .3287661E-02   .1411004E-02
   .6344567E-03   .5711148E-03   .9655848E-03   .1275249E-02   .1144227E-02
   .7390139E-03   .4330456E-03   .7320725E-03   .1857082E-02   .3515579E-02
   .5180184E-02   .6243950E-02   .6096174E-02   .4180685E-02   .4449481E-03
  -.4385135E-02  -.9618511E-02  -.1477854E-01  -.1955192E-01  -.2398709E-01
  -.2820875E-01  -.3189361E-01  -.3439545E-01  -.3553570E-01  -.3577569E-01
  -.3572896E-01  -.3577750E-01  -.3598703E-01  -.3598268E-01  -.3504768E-01
  -.3266977E-01  -.2880558E-01  -.2366514E-01  -.1775868E-01  -.1167357E-01
  -.5892084E-02  -.7466643E-03   .3706624E-02   .7584022E-02   .1046359E-01
   .1173053E-01   .1169072E-01   .1122706E-01   .1090734E-01   .1079801E-01
   .1057469E-01   .9592591E-02   .7776442E-02   .5674975E-02   .3785588E-02
   .2317832E-02   .1226557E-02   .5191904E-03   .4731373E-04  -.4236450E-03
  -.9326491E-03  -.1301167E-02  -.1427989E-02  -.1573507E-02  -.2187116E-02
  -.3424037E-02  -.5009916E-02  -.6991908E-02  -.9638286E-02  -.1275801E-01
  -.1591311E-01  -.1894819E-01  -.2178205E-01  -.2431266E-01  -.2655096E-01
  -.2851698E-01  -.3004758E-01  -.3084296E-01  -.3078555E-01  -.3035206E-01
  -.2989748E-01  -.2912367E-01  -.2757532E-01  -.2534295E-01  -.2305144E-01
  -.2099923E-01  -.1883436E-01  -.1619420E-01  -.1305706E-01  -.9222807E-02
  -.4270097E-02   .1497907E-02   .7333609E-02   .1293449E-01   .1836355E-01
   .2343900E-01   .2758935E-01   .3051696E-01   .3251828E-01   .3386424E-01
   .3449836E-01   .3430264E-01   .3340999E-01   .3230939E-01   .3153797E-01
   .3134208E-01   .3158639E-01   .3156873E-01   .3062053E-01   .2887367E-01
   .2708803E-01   .2557112E-01   .2370347E-01   .2067893E-01   .1664452E-01
   .1239561E-01   .8599392E-02   .5485511E-02   .3011207E-02   .9672838E-03
  -.8630118E-03  -.2394368E-02  -.3475458E-02  -.4310504E-02  -.5308452E-02
  -.6468435E-02  -.7751904E-02  -.9562270E-02  -.1231752E-01  -.1596130E-01
  -.1995291E-01  -.2384313E-01  -.2764500E-01  -.3142022E-01  -.3494771E-01
  -.3815109E-01  -.4122835E-01  -.4426735E-01  -.4713272E-01  -.4954774E-01
  -.5153396E-01  -.5311057E-01  -.5397654E-01  -.5391140E-01  -.5299266E-01
  -.5112892E-01  -.4810879E-01  -.4368126E-01  -.3760394E-01  -.3007316E-01
  -.2188363E-01  -.1402266E-01  -.6843172E-02  -.2044664E-03   .6339928E-02
   .1285739E-01   .1909964E-01   .2489876E-01   .3029666E-01   .3531295E-01
   .3974713E-01   .4322698E-01   .4546933E-01   .4630653E-01   .4577709E-01
   .4396532E-01   .4088406E-01   .3646655E-01   .3073894E-01   .2409397E-01
   .1738750E-01   .1167723E-01   .7599277E-02   .4703530E-02   .2319787E-02
   .3627761E-03  -.8991279E-03  -.1386505E-02  -.1437949E-02  -.1375420E-02
  -.1351832E-02  -.1092693E-02  -.2348433E-03   .1071006E-02   .2553495E-02
   .4077533E-02   .5283748E-02   .5701584E-02   .5359900E-02   .4635208E-02
   .3421075E-02   .1289959E-02  -.1911435E-02  -.5783986E-02  -.9722388E-02
  -.1358588E-01  -.1749425E-01  -.2133280E-01  -.2486982E-01  -.2808731E-01
  -.3088534E-01  -.3290364E-01  -.3402875E-01  -.3465769E-01  -.3529965E-01
  -.3619795E-01  -.3687937E-01  -.3665120E-01  -.3524441E-01  -.3272572E-01
  -.2934853E-01  -.2532305E-01  -.2049979E-01  -.1468782E-01  -.8360344E-02
  -.2353764E-02   .3049587E-02   .8428148E-02   .1401789E-01   .1898122E-01
   .2282139E-01   .2586662E-01   .2846756E-01   .3059155E-01   .3227706E-01
   .3362538E-01   .3426426E-01   .3367666E-01   .3198769E-01   .2986638E-01
   .2758397E-01   .2478188E-01   .2128110E-01   .1721950E-01   .1290423E-01
   .8537906E-02   .4337317E-02   .4403839E-03  -.3171654E-02  -.6437478E-02
  -.9114794E-02  -.1110082E-01  -.1260629E-01  -.1360692E-01  -.1425699E-01
  -.1488055E-01  -.1575384E-01  -.1701406E-01  -.1865509E-01  -.2041485E-01
  -.2205390E-01  -.2341153E-01  -.2442744E-01  -.2516150E-01  -.2569378E-01
  -.2616406E-01  -.2679061E-01  -.2718105E-01  -.2683541E-01  -.2553266E-01
  -.2307709E-01  -.1970174E-01  -.1586673E-01  -.1184571E-01  -.7659950E-02
  -.3227818E-02   .1215240E-02   .5143035E-02   .8353272E-02   .1103373E-01
   .1331110E-01   .1518097E-01   .1642915E-01   .1683816E-01   .1643924E-01
   .1513621E-01   .1262295E-01   .8868970E-02   .4409284E-02  -.2796530E-03
  -.4897753E-02  -.9030070E-02  -.1225257E-01  -.1409999E-01  -.1445077E-01
  -.1356515E-01  -.1172723E-01  -.9236595E-02  -.6337460E-02  -.3376675E-02
  -.6294375E-03   .1912534E-02   .4591846E-02   .7323111E-02   .9244957E-02
   .9589110E-02   .8196228E-02   .5536112E-02   .2036343E-02  -.2285549E-02
  -.7196225E-02  -.1209557E-01  -.1665138E-01  -.2078787E-01  -.2466042E-01
  -.2859204E-01  -.3254942E-01  -.3579642E-01  -.3706465E-01  -.3562685E-01
  -.3201284E-01  -.2744198E-01  -.2233525E-01  -.1615576E-01  -.8837750E-02
  -.1360964E-02   .4843312E-02   .9020511E-02   .1143016E-01   .1282294E-01
   .1368581E-01   .1443898E-01   .1561206E-01   .1710212E-01   .1807903E-01
   .1786835E-01   .1629540E-01   .1341212E-01   .9302135E-02   .4117425E-02
  -.1799011E-02  -.7889143E-02  -.1365311E-01  -.1869977E-01  -.2272539E-01
  -.2534408E-01  -.2594322E-01  -.2438502E-01  -.2145452E-01  -.1824575E-01
  -.1490220E-01  -.1050887E-01  -.4640615E-02   .1670047E-02   .7101818E-02
   .1136919E-01   .1479580E-01   .1780305E-01   .2087378E-01   .2404882E-01
   .2627137E-01   .2629317E-01   .2400508E-01   .2044836E-01   .1679276E-01
   .1357094E-01   .1079060E-01   .8004851E-02   .4580843E-02   .2949986E-03
  -.4352621E-02  -.8764855E-02  -.1277796E-01  -.1646702E-01  -.1965762E-01
  -.2197829E-01  -.2318624E-01  -.2327282E-01  -.2286168E-01  -.2293564E-01
  -.2389393E-01  -.2524593E-01  -.2622420E-01  -.2664450E-01  -.2667613E-01
  -.2613323E-01  -.2442704E-01  -.2114733E-01  -.1656129E-01  -.1144997E-01
  -.6467268E-02  -.2006510E-02   .1880296E-02   .5435788E-02   .8830294E-02
   .1191368E-01   .1445413E-01   .1634521E-01   .1794676E-01   .1973802E-01
   .2165067E-01   .2315434E-01   .2374877E-01   .2331993E-01   .2206009E-01
   .2025994E-01   .1815124E-01   .1588235E-01   .1355610E-01   .1137829E-01
   .9341965E-02   .7038112E-02   .4378221E-02   .1910804E-02   .2176938E-04
  -.1570702E-02  -.3032266E-02  -.3861713E-02  -.3844401E-02  -.3742914E-02
  -.4152828E-02  -.4478498E-02  -.3459299E-02  -.8430986E-03   .2353006E-02
   .5129892E-02   .7092765E-02   .8111636E-02   .8126875E-02   .7437428E-02
   .6532796E-02   .5092536E-02   .2338831E-02  -.1583375E-02  -.5642084E-02
  -.9039148E-02  -.1240145E-01  -.1637083E-01  -.2027963E-01  -.2304269E-01
  -.2472021E-01  -.2644396E-01  -.2879019E-01  -.3131605E-01  -.3327295E-01
  -.3414486E-01  -.3332075E-01  -.3039251E-01  -.2558703E-01  -.1951473E-01
  -.1267879E-01  -.5554753E-02   .1057648E-02   .6352613E-02   .1036115E-01
   .1392241E-01   .1793235E-01   .2231517E-01   .2662205E-01   .3061404E-01
   .3397858E-01   .3625686E-01   .3706577E-01   .3616089E-01   .3352950E-01
   .3021667E-01   .2793898E-01   .2653103E-01   .2325596E-01   .1722372E-01
   .1204601E-01   .1020750E-01   .8546819E-02   .3768828E-02  -.9719581E-03
  -.4111857E-03   .4382370E-02   .6898735E-02   .3392884E-02  -.3387993E-02
  -.8296099E-02  -.9225672E-02  -.8163881E-02  -.8282952E-02  -.1070614E-01
  -.1409061E-01  -.1707789E-01  -.1945354E-01  -.2092600E-01  -.2109713E-01
  -.2066853E-01  -.2112741E-01  -.2289749E-01  -.2491100E-01  -.2621909E-01
  -.2712487E-01  -.2804206E-01  -.2860524E-01  -.2849260E-01  -.2850588E-01
  -.2982812E-01  -.3211283E-01  -.3359974E-01  -.3343230E-01  -.3250785E-01
  -.3147977E-01  -.2958262E-01  -.2641862E-01  -.2295298E-01  -.2015257E-01
  -.1760043E-01  -.1450483E-01  -.1096825E-01  -.7289851E-02  -.3593242E-02
   .2000840E-03   .4336595E-02   .8514607E-02   .1173621E-01   .1332582E-01
   .1393058E-01   .1438368E-01   .1447925E-01   .1347371E-01   .1144167E-01
   .9486304E-02   .8301506E-02   .7224348E-02   .5363432E-02   .3116324E-02
   .1543626E-02   .6211483E-03  -.7598413E-03  -.3251571E-02  -.6386747E-02
  -.9434304E-02  -.1213458E-01  -.1495426E-01  -.1855122E-01  -.2292711E-01
  -.2735167E-01  -.3081658E-01  -.3299554E-01  -.3477915E-01  -.3690072E-01
  -.3882080E-01  -.3950325E-01  -.3875176E-01  -.3761214E-01  -.3718050E-01
  -.3752333E-01  -.3804419E-01  -.3831064E-01  -.3807144E-01  -.3751339E-01
  -.3672789E-01  -.3551449E-01  -.3397386E-01  -.3239495E-01  -.3092753E-01
  -.2927128E-01  -.2680740E-01  -.2318449E-01  -.1872365E-01  -.1381376E-01
  -.8459629E-02  -.2630226E-02   .3434358E-02   .9325330E-02   .1485657E-01
   .2004306E-01   .2474981E-01   .2833581E-01   .3046168E-01   .3178177E-01
   .3305759E-01   .3414209E-01   .3443224E-01   .3396300E-01   .3326136E-01
   .3278935E-01   .3263794E-01   .3269988E-01   .3296167E-01   .3322171E-01
   .3314567E-01   .3268595E-01   .3202021E-01   .3119638E-01   .3014143E-01
   .2918406E-01   .2890760E-01   .2944070E-01   .3042307E-01   .3148190E-01
   .3257770E-01   .3365773E-01   .3433912E-01   .3396238E-01   .3189683E-01
   .2833077E-01   .2426646E-01   .2029397E-01   .1579935E-01   .1001990E-01
   .3224194E-02  -.3219837E-02  -.8010888E-02  -.1113467E-01  -.1346544E-01
  -.1558019E-01  -.1717316E-01  -.1783771E-01  -.1775852E-01  -.1722697E-01
  -.1634898E-01  -.1519666E-01  -.1398481E-01  -.1313140E-01  -.1286764E-01
  -.1279703E-01  -.1187348E-01  -.9072308E-02  -.4124977E-02   .1921622E-02
   .7247294E-02   .1067103E-01   .1183929E-01   .1073388E-01   .8119010E-02
   .6055120E-02   .6550134E-02   .9723061E-02   .1395448E-01   .1777314E-01
   .2085589E-01   .2298693E-01   .2374154E-01   .2343572E-01   .2302747E-01
   .2277570E-01   .2203818E-01   .2029677E-01   .1781339E-01   .1507660E-01
   .1213187E-01   .8860683E-02   .5344523E-02   .1514817E-02  -.2910839E-02
  -.7756625E-02  -.1207153E-01  -.1490289E-01  -.1604137E-01  -.1612683E-01
  -.1568400E-01  -.1443231E-01  -.1235622E-01  -.9971381E-02  -.7538542E-02
  -.5209278E-02  -.3103401E-02  -.1171692E-02   .7392698E-03   .2470076E-02
   .3723571E-02   .4513754E-02   .5019090E-02   .5336833E-02   .5488535E-02
   .5587363E-02   .5575574E-02   .5047357E-02   .3527017E-02   .9017370E-03
  -.2302477E-02  -.4935213E-02  -.6430163E-02  -.7160337E-02  -.7672129E-02
  -.8083850E-02  -.8402075E-02  -.8872228E-02  -.9552430E-02  -.1016810E-01
  -.1056591E-01  -.1085266E-01  -.1103932E-01  -.1075948E-01  -.9838518E-02
  -.8200701E-02  -.5797748E-02  -.2900303E-02  -.1466502E-03   .1575548E-02
   .1608174E-02  -.1693757E-03  -.3352043E-02  -.7203876E-02  -.1058546E-01
  -.1273525E-01  -.1376844E-01  -.1391518E-01  -.1311096E-01  -.1119088E-01
  -.8455454E-02  -.5648884E-02  -.3090099E-02  -.6977020E-03   .1423946E-02
   .3152525E-02   .4643135E-02   .6300720E-02   .8466571E-02   .1116904E-01
   .1436145E-01   .1793168E-01   .2160005E-01   .2509635E-01   .2845481E-01
   .3198833E-01   .3584702E-01   .4005263E-01   .4466188E-01   .4927132E-01
   .5333930E-01   .5674649E-01   .5969772E-01   .6223829E-01   .6394392E-01
   .6449236E-01   .6366602E-01   .6108355E-01   .5668348E-01   .5103656E-01
   .4488967E-01   .3853219E-01   .3178118E-01   .2469929E-01   .1791978E-01
   .1191758E-01   .6563709E-02   .1704884E-02  -.2672855E-02  -.6536553E-02
  -.9899513E-02  -.1285310E-01  -.1547416E-01  -.1794137E-01  -.2068790E-01
  -.2381762E-01  -.2705446E-01  -.3031175E-01  -.3372049E-01  -.3744779E-01
  -.4143846E-01  -.4531889E-01  -.4872308E-01  -.5143200E-01  -.5333493E-01
  -.5449877E-01  -.5500892E-01  -.5491897E-01  -.5435925E-01  -.5335130E-01
  -.5167830E-01  -.4913854E-01  -.4609581E-01  -.4327751E-01  -.4077140E-01
  -.3752834E-01  -.3285739E-01  -.2711260E-01  -.2070609E-01  -.1359678E-01
  -.5649131E-02   .2841566E-02   .1142912E-01   .1982125E-01   .2753242E-01
   .3391507E-01   .3880530E-01   .4267878E-01   .4568370E-01   .4719533E-01
   .4667349E-01   .4435070E-01   .4086683E-01   .3673775E-01   .3236702E-01
   .2812205E-01   .2428024E-01   .2104309E-01   .1829785E-01   .1574088E-01
   .1331129E-01   .1140949E-01   .1032826E-01   .1004981E-01   .1052160E-01
   .1185821E-01   .1399638E-01   .1634515E-01   .1836330E-01   .1975904E-01
   .2054706E-01   .2101131E-01   .2119271E-01   .2079911E-01   .1948934E-01
   .1716716E-01   .1406429E-01   .1065144E-01   .7077122E-02   .3251711E-02
  -.7526030E-03  -.4718604E-02  -.8631087E-02  -.1259589E-01  -.1657640E-01
  -.2037679E-01  -.2347553E-01  -.2531744E-01  -.2596384E-01  -.2575087E-01
  -.2456693E-01  -.2215335E-01  -.1874066E-01  -.1494086E-01  -.1065578E-01
  -.4842565E-02   .2871381E-02   .1081410E-01   .1686169E-01   .2092498E-01
   .2469253E-01   .2922939E-01   .3339420E-01   .3546128E-01   .3545159E-01
   .3481481E-01   .3416995E-01   .3292781E-01   .3083050E-01   .2862222E-01
   .2738730E-01   .2748516E-01   .2855345E-01   .3017983E-01   .3218098E-01
   .3451209E-01   .3693678E-01   .3927765E-01   .4138666E-01   .4286777E-01
   .4334760E-01   .4295493E-01   .4193621E-01   .3994258E-01   .3676667E-01
   .3282329E-01   .2877878E-01   .2507875E-01   .2175494E-01   .1862402E-01
   .1566920E-01   .1309086E-01   .1110875E-01   .9763924E-02   .8868291E-02
   .8284678E-02   .8149918E-02   .8523673E-02   .9270733E-02   .1023123E-01
   .1120845E-01   .1186098E-01   .1212731E-01   .1252584E-01   .1332767E-01
   .1414775E-01   .1451920E-01   .1431445E-01   .1384898E-01   .1353433E-01
   .1322619E-01   .1255275E-01   .1150819E-01   .1016143E-01   .8355853E-02
   .5867910E-02   .2986296E-02   .4186610E-03  -.1673801E-02  -.3530362E-02
  -.5054232E-02  -.5962551E-02  -.6345887E-02  -.6464202E-02  -.6458184E-02
  -.6232889E-02  -.5716748E-02  -.4973386E-02  -.3752989E-02  -.2277969E-02
  -.1771086E-02  -.2941331E-02  -.4659448E-02  -.5234630E-02  -.4648888E-02
  -.4417271E-02  -.5383150E-02  -.6953925E-02  -.8438106E-02  -.1001348E-01
  -.1192658E-01  -.1388066E-01  -.1584472E-01  -.1802634E-01  -.2007445E-01
  -.2151598E-01  -.2236549E-01  -.2275209E-01  -.2244649E-01  -.2111029E-01
  -.1893853E-01  -.1630109E-01  -.1326075E-01  -.1010747E-01  -.7360811E-02
  -.5233241E-02  -.3470991E-02  -.1747175E-02  -.8145804E-04   .1477257E-02
   .3177008E-02   .5239515E-02   .7414890E-02   .9298478E-02   .1056502E-01
   .1073342E-01   .9515052E-02   .6984427E-02   .3433190E-02  -.1067210E-02
  -.6313629E-02  -.1178223E-01  -.1658380E-01  -.1991460E-01  -.2147564E-01
  -.2149380E-01  -.2016391E-01  -.1743038E-01  -.1335080E-01  -.8107528E-02
  -.1760236E-02   .5386778E-02   .1251239E-01   .1864818E-01   .2338967E-01
   .2666444E-01   .2840616E-01   .2889953E-01   .2850913E-01   .2727920E-01
   .2477606E-01   .2073101E-01   .1521755E-01   .8560344E-02   .1108818E-02
  -.6664790E-02  -.1416010E-01  -.2078972E-01  -.2613034E-01  -.3022375E-01
  -.3331972E-01  -.3556736E-01  -.3714851E-01  -.3822046E-01  -.3878532E-01
  -.3903876E-01  -.3923491E-01  -.3945553E-01  -.3977140E-01  -.4008958E-01
  -.4014135E-01  -.3964132E-01  -.3835055E-01  -.3635102E-01  -.3395124E-01
  -.3157097E-01  -.2974608E-01  -.2879147E-01  -.2878144E-01  -.2958319E-01
  -.3086276E-01  -.3239662E-01  -.3407093E-01  -.3564288E-01  -.3709744E-01
  -.3855831E-01  -.3991700E-01  -.4104596E-01  -.4197501E-01  -.4240627E-01
  -.4209773E-01  -.4111952E-01  -.3944004E-01  -.3685428E-01  -.3307497E-01
  -.2792239E-01  -.2164128E-01  -.1477831E-01  -.7919198E-02  -.1176897E-02
   .5510328E-02   .1224704E-01   .1887556E-01   .2464716E-01   .2912935E-01
   .3247655E-01   .3507031E-01   .3703995E-01   .3822113E-01   .3867151E-01
   .3842243E-01   .3727368E-01   .3512830E-01   .3227816E-01   .2911569E-01
   .2589453E-01   .2275713E-01   .1982269E-01   .1730772E-01   .1524925E-01
   .1347613E-01   .1200540E-01   .1098549E-01   .1026485E-01   .9640778E-02
   .9145264E-02   .8783592E-02   .8311645E-02   .7612269E-02   .6791767E-02
   .5927967E-02   .4984229E-02   .3866191E-02   .2646707E-02   .1497234E-02
   .2190770E-03  -.1282066E-02  -.2898171E-02  -.4217330E-02  -.4926275E-02
  -.4919990E-02  -.4172166E-02  -.3011539E-02  -.1940715E-02  -.1333145E-02
  -.1347396E-02  -.1988854E-02  -.2910044E-02  -.3594352E-02  -.3613458E-02
  -.3017089E-02  -.2180266E-02  -.1045194E-02   .6967707E-03   .3012270E-02
   .5493535E-02   .7677931E-02   .9651920E-02   .1166869E-01   .1337199E-01
   .1426117E-01   .1433708E-01   .1379332E-01   .1252338E-01   .1024750E-01
   .7081331E-02   .3738258E-02   .8525129E-03  -.1372718E-02  -.2956869E-02
  -.3885814E-02  -.4110169E-02  -.3671368E-02  -.2684147E-02  -.1244601E-02
   .4904658E-03   .2348742E-02   .4318514E-02   .6373371E-02   .8417760E-02
   .1014198E-01   .1130598E-01   .1173965E-01   .1124294E-01   .1002733E-01
   .8521009E-02   .6843572E-02   .4904082E-02   .2630913E-02   .1480573E-03
  -.2451031E-02  -.5031208E-02  -.7478327E-02  -.9640024E-02  -.1129768E-01
  -.1232293E-01  -.1276181E-01  -.1261022E-01  -.1192148E-01  -.1093421E-01
  -.9645348E-02  -.7929247E-02  -.5638438E-02  -.2482054E-02   .1254738E-02
   .5122261E-02   .9051749E-02   .1310636E-01   .1718710E-01   .2087732E-01
   .2380790E-01   .2578429E-01   .2662658E-01   .2629341E-01   .2500936E-01
   .2305872E-01   .2056945E-01   .1762931E-01   .1443381E-01   .1125054E-01
   .8464441E-02   .6361573E-02   .4924567E-02   .3800543E-02   .2661424E-02
   .1614722E-02   .9262676E-03   .6922289E-03   .8270837E-03   .1217115E-02
   .1844284E-02   .2415565E-02   .2476792E-02   .2116398E-02   .1631110E-02
   .1070687E-02   .2394538E-03  -.1175447E-02  -.3342450E-02  -.6188188E-02
  -.9389794E-02  -.1267844E-01  -.1584278E-01  -.1868319E-01  -.2119115E-01
  -.2341907E-01  -.2533787E-01  -.2672963E-01  -.2740727E-01  -.2741131E-01
  -.2685868E-01  -.2588219E-01  -.2476596E-01  -.2357482E-01  -.2214329E-01
  -.2051723E-01  -.1908978E-01  -.1837500E-01  -.1827960E-01  -.1823698E-01
  -.1799593E-01  -.1782799E-01  -.1789344E-01  -.1784623E-01  -.1753371E-01
  -.1736389E-01  -.1742245E-01  -.1718857E-01  -.1634961E-01  -.1504386E-01
  -.1345667E-01  -.1143704E-01  -.8832766E-02  -.5943703E-02  -.3112588E-02
  -.2959671E-03   .2481765E-02   .5037803E-02   .7387548E-02   .9830896E-02
   .1224944E-01   .1421354E-01   .1553495E-01   .1640322E-01   .1706555E-01
   .1771357E-01   .1833111E-01   .1875393E-01   .1873523E-01   .1793730E-01
   .1611558E-01   .1355057E-01   .1069349E-01   .7657207E-02   .4514704E-02
   .1216232E-02  -.2486458E-02  -.6594339E-02  -.1090466E-01  -.1502748E-01
  -.1839404E-01  -.2067758E-01  -.2193891E-01  -.2232253E-01  -.2193493E-01
  -.2094626E-01  -.1956471E-01  -.1783287E-01  -.1555555E-01  -.1260128E-01
  -.9210876E-02  -.5743041E-02  -.2487742E-02   .4277724E-03   .3258674E-02
   .6140433E-02   .8904776E-02   .1146609E-01   .1404724E-01   .1667501E-01
   .1927416E-01   .2170483E-01   .2361708E-01   .2481637E-01   .2535575E-01
   .2547588E-01   .2543187E-01   .2514523E-01   .2466484E-01   .2423214E-01
   .2372781E-01   .2303547E-01   .2247187E-01   .2249006E-01   .2333995E-01
   .2501287E-01   .2729454E-01   .2989414E-01   .3276396E-01   .3571148E-01
   .3834197E-01   .4055213E-01   .4244016E-01   .4395151E-01   .4472443E-01
   .4462561E-01   .4358562E-01   .4160831E-01   .3895317E-01   .3591420E-01
   .3276857E-01   .2986293E-01   .2744960E-01   .2551669E-01   .2397020E-01
   .2287485E-01   .2242436E-01   .2275306E-01   .2378948E-01   .2533541E-01
   .2718966E-01   .2912670E-01   .3077463E-01   .3168879E-01   .3174154E-01
   .3095809E-01   .2933193E-01   .2672470E-01   .2328160E-01   .1945750E-01
   .1557505E-01   .1175750E-01   .8234985E-02   .5248953E-02   .2640296E-02
   .1492697E-03  -.2531872E-02  -.5401451E-02  -.8137650E-02  -.1065521E-01
  -.1294328E-01  -.1477745E-01  -.1601203E-01  -.1671459E-01  -.1697815E-01
  -.1671270E-01  -.1581898E-01  -.1479076E-01  -.1433093E-01  -.1454415E-01
  -.1529937E-01  -.1664747E-01  -.1864257E-01  -.2104729E-01  -.2346684E-01
  -.2574384E-01  -.2765360E-01  -.2867623E-01  -.2851481E-01  -.2737382E-01
  -.2552860E-01  -.2294859E-01  -.1967360E-01  -.1606253E-01  -.1260911E-01
  -.9633055E-02  -.7309869E-02  -.5794860E-02  -.4927107E-02  -.4412385E-02
  -.4208438E-02  -.4377456E-02  -.4718340E-02  -.5002442E-02  -.5294910E-02
  -.5799267E-02  -.6532739E-02  -.7303159E-02  -.8042047E-02  -.8966840E-02
  -.9921585E-02  -.1072115E-01  -.1151865E-01  -.1217024E-01  -.1225167E-01
  -.1201067E-01  -.1213033E-01  -.1288324E-01  -.1407546E-01  -.1540822E-01
  -.1678881E-01  -.1829751E-01  -.1982391E-01  -.2123517E-01  -.2253991E-01
  -.2356377E-01  -.2389915E-01  -.2300594E-01  -.2051505E-01  -.1690281E-01
  -.1340112E-01  -.1081036E-01  -.8669293E-02  -.6199692E-02  -.3459410E-02
  -.1207341E-02   .2858563E-03   .1571010E-02   .2798244E-02   .3262160E-02
   .2338007E-02   .3145584E-03  -.2417596E-02  -.5812593E-02  -.9511606E-02
  -.1275647E-01  -.1530816E-01  -.1766489E-01  -.2000749E-01  -.2169931E-01
  -.2221954E-01  -.2191597E-01  -.2164309E-01  -.2172585E-01  -.2193260E-01
  -.2221389E-01  -.2281269E-01  -.2365714E-01  -.2448443E-01  -.2501863E-01
  -.2511525E-01  -.2468620E-01  -.2359328E-01  -.2193208E-01  -.2009773E-01
  -.1850996E-01  -.1728842E-01  -.1635253E-01  -.1556226E-01  -.1480404E-01
  -.1399152E-01  -.1302440E-01  -.1201625E-01  -.1116277E-01  -.1035900E-01
  -.9537164E-02  -.8782515E-02  -.8325019E-02  -.8189813E-02  -.8214792E-02
  -.8373583E-02  -.8876570E-02  -.9565231E-02  -.9995099E-02  -.9786135E-02
  -.8874966E-02  -.7585578E-02  -.6067812E-02  -.4251086E-02  -.2236516E-02
  -.2134240E-03   .1781778E-02   .3408596E-02   .4624728E-02   .5677431E-02
   .6761506E-02   .7967431E-02   .9030138E-02   .9831463E-02   .1034128E-01
   .1049019E-01   .1045232E-01   .1060839E-01   .1089614E-01   .1083356E-01
   .1032753E-01   .9695404E-02   .8863303E-02   .7744882E-02   .6842814E-02
   .6688441E-02   .6677136E-02   .5727456E-02   .3531795E-02   .7606006E-03
  -.1835400E-02  -.4234874E-02  -.6822256E-02  -.9742735E-02  -.1299799E-01
  -.1618271E-01  -.1839096E-01  -.1902738E-01  -.1853895E-01  -.1809702E-01
  -.1840395E-01  -.1888864E-01  -.1825761E-01  -.1587125E-01  -.1249972E-01
  -.9355567E-02  -.6875760E-02  -.4749868E-02  -.2434183E-02   .3870702E-03
   .3426077E-02   .6114956E-02   .8233347E-02   .1000789E-01   .1150034E-01
   .1258411E-01   .1323756E-01   .1338405E-01   .1293867E-01   .1194166E-01
   .1058367E-01   .9168455E-02   .7939664E-02   .6910493E-02   .5925044E-02
   .5141291E-02   .4901998E-02   .4951217E-02   .4818377E-02   .4593310E-02
   .4804567E-02   .5296856E-02   .5398240E-02   .4938012E-02   .4159293E-02
   .3380019E-02   .2815970E-02   .2562972E-02   .2497273E-02   .2372026E-02
   .2013657E-02   .1433670E-02   .8763740E-03   .4918935E-03  -.4481602E-04
  -.1208155E-02  -.2872972E-02  -.4315282E-02  -.5106741E-02  -.5467010E-02
  -.5836276E-02  -.6293028E-02  -.6758460E-02  -.7158720E-02  -.7643952E-02
  -.8568984E-02  -.9941673E-02  -.1130249E-01  -.1222238E-01  -.1264110E-01
  -.1263877E-01  -.1207753E-01  -.1091988E-01  -.9294955E-02  -.7443631E-02
  -.5427802E-02  -.3200382E-02  -.1007525E-02   .6880354E-03   .1814134E-02
   .2736035E-02   .3890812E-02   .5344776E-02   .6912292E-02   .8542348E-02
   .1020016E-01   .1165916E-01   .1294126E-01   .1390498E-01   .1437994E-01
   .1456630E-01   .1465251E-01   .1497564E-01   .1564561E-01   .1622162E-01
   .1623154E-01   .1573232E-01   .1529039E-01   .1533731E-01   .1577176E-01
   .1597126E-01   .1560992E-01   .1477132E-01   .1355726E-01   .1228547E-01
   .1112260E-01   .1019514E-01   .9567289E-02   .9277563E-02   .9497073E-02
   .1041311E-01   .1189228E-01   .1350013E-01   .1495661E-01   .1633093E-01
   .1788002E-01   .1968587E-01   .2160931E-01   .2352334E-01   .2549615E-01
   .2719593E-01   .2785622E-01   .2755370E-01   .2695846E-01   .2628262E-01
   .2516024E-01   .2319746E-01   .2043696E-01   .1733829E-01   .1400471E-01
   .1032808E-01   .6454949E-02   .2655586E-02  -.1003486E-02  -.4530497E-02
  -.7653376E-02  -.1017671E-01  -.1202055E-01  -.1322864E-01  -.1396101E-01
  -.1423487E-01  -.1418527E-01  -.1412609E-01  -.1403193E-01  -.1377557E-01
  -.1336589E-01  -.1282108E-01  -.1222386E-01  -.1164589E-01  -.1108804E-01
  -.1035169E-01  -.9337053E-02  -.8192802E-02  -.7049077E-02  -.5912495E-02
  -.4653823E-02  -.3156904E-02  -.1626691E-02  -.2760886E-03   .9891169E-03
   .2405881E-02   .4028667E-02   .5908112E-02   .8155332E-02   .1071059E-01
   .1299804E-01   .1420133E-01   .1407879E-01   .1311875E-01   .1203888E-01
   .1125878E-01   .1067420E-01   .9852425E-02   .8533009E-02   .6923964E-02
   .5533009E-02   .4551649E-02   .3603856E-02   .2206677E-02   .2811130E-03
  -.1669951E-02  -.2895729E-02  -.2902861E-02  -.2068110E-02  -.1538388E-02
  -.2387100E-02  -.4297012E-02  -.5654163E-02  -.5461331E-02  -.4451761E-02
  -.3876837E-02  -.4133408E-02  -.4615947E-02  -.4506365E-02  -.3529691E-02
  -.1920722E-02  -.1254205E-03   .1491090E-02   .2579592E-02   .3215267E-02
   .3917559E-02   .4934968E-02   .5802657E-02   .5944863E-02   .5378316E-02
   .4420943E-02   .3470032E-02   .2812029E-02   .2441185E-02   .2135283E-02
   .1817519E-02   .1489598E-02   .1271982E-02   .1483935E-02   .2156593E-02
   .3154808E-02   .4415806E-02   .5727636E-02   .6731618E-02   .7189697E-02
   .7284713E-02   .7171612E-02   .6850210E-02   .6208021E-02   .4859561E-02
   .2572861E-02  -.5559266E-03  -.4219995E-02  -.7960775E-02  -.1152778E-01
  -.1500566E-01  -.1819986E-01  -.2062163E-01  -.2212372E-01  -.2291679E-01
  -.2329052E-01  -.2315017E-01  -.2227088E-01  -.2057808E-01  -.1812264E-01
  -.1499383E-01  -.1153186E-01  -.8290099E-02  -.5538055E-02  -.3177765E-02
  -.1045933E-02   .5334288E-03   .1278021E-02   .1278797E-02   .7676816E-03
  -.9769268E-04  -.1608771E-02  -.4159325E-02  -.7702810E-02  -.1171829E-01
  -.1563553E-01  -.1915566E-01  -.2229410E-01  -.2517839E-01  -.2786472E-01
  -.3025058E-01  -.3198593E-01  -.3298720E-01  -.3353503E-01  -.3391111E-01
  -.3410417E-01  -.3385097E-01  -.3297292E-01  -.3174837E-01  -.3045959E-01
  -.2898481E-01  -.2734815E-01  -.2559334E-01  -.2365171E-01  -.2164423E-01
  -.1967431E-01  -.1789316E-01  -.1668012E-01  -.1597368E-01  -.1541400E-01
  -.1470025E-01  -.1395270E-01  -.1332006E-01  -.1282897E-01  -.1246060E-01
  -.1210114E-01  -.1164893E-01  -.1102260E-01  -.1014529E-01  -.9112428E-02
  -.8148377E-02  -.7118080E-02  -.5996928E-02  -.4944898E-02  -.3884440E-02
  -.2653245E-02  -.1389566E-02  -.2250460E-03   .9439404E-03   .2248004E-02
   .3425771E-02   .4131168E-02   .4318068E-02   .4054381E-02   .3494486E-02
   .2706784E-02   .1758553E-02   .7694648E-03  -.1321835E-03  -.7915790E-03
  -.1199102E-02  -.1450166E-02  -.1337335E-02  -.6081818E-03   .6066781E-03
   .1833582E-02   .2708690E-02   .3112976E-02   .3157325E-02   .2749372E-02
   .1665255E-02  -.4721972E-05  -.2097978E-02  -.4417449E-02  -.6857061E-02
  -.9327829E-02  -.1163940E-01  -.1366165E-01  -.1544115E-01  -.1687535E-01
  -.1761489E-01  -.1739612E-01  -.1630787E-01  -.1483877E-01  -.1334913E-01
  -.1164544E-01  -.9528683E-02  -.7305585E-02  -.5457400E-02  -.4339965E-02
  -.3955126E-02  -.4132279E-02  -.4784446E-02  -.5822435E-02  -.7266634E-02
  -.9054353E-02  -.1113502E-01  -.1331423E-01  -.1523657E-01  -.1679979E-01
  -.1818172E-01  -.1945117E-01  -.2039053E-01  -.2069745E-01  -.2051432E-01
  -.2004859E-01  -.1906999E-01  -.1737192E-01  -.1510649E-01  -.1257779E-01
  -.9939923E-02  -.7215433E-02  -.4339103E-02  -.1673865E-02   .3493690E-03
   .1499942E-02   .2065124E-02   .2330517E-02   .2084163E-02   .1196397E-02
  -.7980682E-04  -.1307151E-02  -.2222902E-02  -.2778354E-02  -.3027055E-02
  -.2898914E-02  -.2205265E-02  -.8456654E-03   .8816301E-03   .2671871E-02
   .4761980E-02   .7393801E-02   .1040320E-01   .1335566E-01   .1595965E-01
   .1826643E-01   .2054393E-01   .2280443E-01   .2467765E-01   .2576348E-01
   .2596044E-01   .2533123E-01   .2398527E-01   .2206756E-01   .1970645E-01
   .1697119E-01   .1421820E-01   .1201976E-01   .1081529E-01   .1052855E-01
   .1053212E-01   .1021122E-01   .9342256E-02   .8200092E-02   .7009277E-02
   .5686467E-02   .4088187E-02   .2455025E-02   .1272906E-02   .7422350E-03
   .5049842E-03  -.2624567E-03  -.1789138E-02  -.3362961E-02  -.4519314E-02
  -.5644279E-02  -.7195099E-02  -.9073720E-02  -.1099563E-01  -.1283305E-01
  -.1445762E-01  -.1563977E-01  -.1620350E-01  -.1619613E-01  -.1588954E-01
  -.1555612E-01  -.1506958E-01  -.1399416E-01  -.1213774E-01  -.9598683E-02
  -.6527316E-02  -.3070925E-02   .6887633E-03   .4686736E-02   .8589338E-02
   .1231667E-01   .1589247E-01   .1895289E-01   .2111556E-01   .2235357E-01
   .2262103E-01   .2177915E-01   .1991603E-01   .1683128E-01   .1231971E-01
   .6702419E-02   .6587851E-03  -.5150706E-02  -.1037569E-01  -.1496467E-01
  -.1903351E-01  -.2248032E-01  -.2479220E-01  -.2557847E-01  -.2507914E-01
  -.2341107E-01  -.2053871E-01  -.1667750E-01  -.1191764E-01  -.6275161E-02
  -.9760907E-04   .6017781E-02   .1170823E-01   .1698182E-01   .2168452E-01
   .2552525E-01   .2824922E-01   .2982331E-01   .3031542E-01   .2953236E-01
   .2731643E-01   .2407274E-01   .2045973E-01   .1687789E-01   .1332088E-01
   .9591412E-02   .6042060E-02   .3245601E-02   .1302121E-02   .4897965E-04
  -.7375139E-03  -.1159544E-02  -.1151628E-02  -.6137080E-03   .2614858E-03
   .1038703E-02   .1596809E-02   .1976985E-02   .2268503E-02   .2512537E-02
   .2641076E-02   .2670875E-02   .2478925E-02   .2003567E-02   .1501929E-02
   .1320971E-02   .1678687E-02   .2424481E-02   .3194896E-02   .3666718E-02
   .3686705E-02   .3427484E-02   .3007914E-02   .2307284E-02   .1119363E-02
  -.7276262E-03  -.3169798E-02  -.5868753E-02  -.8504777E-02  -.1086533E-01
  -.1272276E-01  -.1381983E-01  -.1420491E-01  -.1404742E-01  -.1360662E-01
  -.1319244E-01  -.1267816E-01  -.1200255E-01  -.1124639E-01  -.1024850E-01
  -.8886734E-02  -.7260338E-02  -.5536270E-02  -.3553674E-02  -.1214094E-02
   .1087047E-02   .2845470E-02   .3968853E-02   .4602317E-02   .4940162E-02
   .5210797E-02   .5549153E-02   .6075957E-02   .6865827E-02   .7869077E-02
   .9076774E-02   .1054095E-01   .1214711E-01   .1400393E-01   .1614236E-01
   .1827304E-01   .2009482E-01   .2136384E-01   .2217219E-01   .2262050E-01
   .2248250E-01   .2151913E-01   .1978723E-01   .1786428E-01   .1661607E-01
   .1615203E-01   .1580153E-01   .1513235E-01   .1441433E-01   .1389634E-01
   .1326332E-01   .1211679E-01   .1059806E-01   .9032204E-02   .7451170E-02
   .5738461E-02   .3808803E-02   .1763286E-02  -.1555803E-05  -.1204145E-02
  -.2193468E-02  -.3333994E-02  -.4513200E-02  -.5346691E-02  -.5680157E-02
  -.5745145E-02  -.5652643E-02  -.5145573E-02  -.4064326E-02  -.2679666E-02
  -.1380615E-02  -.4714071E-03   .1627076E-03   .6361024E-03   .5967573E-03
  -.3867561E-03  -.2073034E-02  -.3529347E-02  -.4361010E-02  -.4997333E-02
  -.6062471E-02  -.7440395E-02  -.8375583E-02  -.8481643E-02  -.8023312E-02
  -.7322009E-02  -.6358550E-02  -.4976790E-02  -.3063589E-02  -.8616412E-03
   .1259979E-02   .3265384E-02   .5217045E-02   .7225856E-02   .9422067E-02
   .1176414E-01   .1394773E-01   .1541577E-01   .1575605E-01   .1497502E-01
   .1325344E-01   .1095109E-01   .8327655E-02   .5358341E-02   .2073379E-02
  -.1347722E-02  -.4565283E-02  -.7091636E-02  -.8493691E-02  -.9054221E-02
  -.9405888E-02  -.9320271E-02  -.8429060E-02  -.7154248E-02  -.5958921E-02
  -.4646841E-02  -.3033631E-02  -.1223800E-02   .3766822E-03   .1344451E-02
   .1470106E-02   .9025648E-03   .1812398E-04  -.8932478E-03  -.1742676E-02
  -.2325736E-02  -.2402047E-02  -.2397241E-02  -.2889339E-02  -.4006656E-02
  -.5287976E-02  -.6257721E-02  -.7120275E-02  -.8411526E-02  -.9901103E-02
  -.1095034E-01  -.1120151E-01  -.1071430E-01  -.9793631E-02  -.8616724E-02
  -.7204704E-02  -.5621873E-02  -.4011622E-02  -.2462291E-02  -.1199635E-02
  -.5177324E-03  -.4608571E-03  -.5666375E-03  -.8780424E-04   .1207949E-02
   .2982147E-02   .4813333E-02   .6529704E-02   .8226058E-02   .1027691E-01
   .1286177E-01   .1557556E-01   .1778442E-01   .1925273E-01   .2045296E-01
   .2176041E-01   .2303435E-01   .2393670E-01   .2417262E-01   .2362635E-01
   .2259731E-01   .2158426E-01   .2047411E-01   .1895872E-01   .1691728E-01
   .1445280E-01   .1205772E-01   .1002017E-01   .8206189E-02   .6397028E-02
   .4461770E-02   .2799164E-02   .1856806E-02   .1452608E-02   .1197347E-02
   .1024301E-02   .1316699E-02   .2489197E-02   .4229199E-02   .6017159E-02
   .7744291E-02   .9394615E-02   .1062504E-01   .1102287E-01   .1032509E-01
   .8695005E-02   .6625541E-02   .4564399E-02   .2763164E-02   .1341945E-02
   .4554994E-03   .9857530E-04   .1009374E-03   .4183090E-03   .1253208E-02
   .2590955E-02   .4089686E-02   .5369196E-02   .6235952E-02   .6596301E-02
   .6677023E-02   .6780512E-02   .6855626E-02   .6672862E-02   .5880009E-02
   .4515986E-02   .2962446E-02   .1303953E-02  -.5840564E-03  -.2914008E-02
  -.5813926E-02  -.9228049E-02  -.1284458E-01  -.1612599E-01  -.1857895E-01
  -.1993542E-01  -.2055467E-01  -.2108387E-01  -.2161198E-01  -.2172304E-01
  -.2114061E-01  -.2008449E-01  -.1889824E-01  -.1725824E-01  -.1490700E-01
  -.1244756E-01  -.1078216E-01  -.1008405E-01  -.9892602E-02  -.9698237E-02
  -.9340863E-02  -.8981830E-02  -.8738892E-02  -.8362856E-02  -.7613810E-02
  -.6523497E-02  -.5330116E-02  -.4308595E-02  -.3589398E-02  -.3186332E-02
  -.3261514E-02  -.3894197E-02  -.4819931E-02  -.5759858E-02  -.6655021E-02
  -.7418170E-02  -.7825216E-02  -.7710089E-02  -.7101949E-02  -.6131763E-02
  -.4886353E-02  -.3342222E-02  -.1353465E-02   .1056106E-02   .3845188E-02
   .6774685E-02   .9357201E-02   .1140656E-01   .1298381E-01   .1408257E-01
   .1467456E-01   .1484614E-01   .1495427E-01   .1518110E-01   .1538625E-01
   .1535900E-01   .1513794E-01   .1463933E-01   .1363060E-01   .1216675E-01
   .1046128E-01   .8481839E-02   .6268356E-02   .4042432E-02   .1537760E-02
  -.1561349E-02  -.5158949E-02  -.8800276E-02  -.1179492E-01  -.1375583E-01
  -.1492793E-01  -.1577340E-01  -.1645354E-01  -.1697764E-01  -.1734920E-01
  -.1735152E-01  -.1679814E-01  -.1574768E-01  -.1433581E-01  -.1271323E-01
  -.1089641E-01  -.8703718E-02  -.6279962E-02  -.3809477E-02  -.1207168E-02
   .1435717E-02   .3929560E-02   .6100804E-02   .7742156E-02   .8779619E-02
   .9286175E-02   .9289657E-02   .9012802E-02   .8756891E-02   .8228503E-02
   .7111251E-02   .5740876E-02   .4424091E-02   .3240223E-02   .2280624E-02
   .1642390E-02   .1439489E-02   .1556509E-02   .1905550E-02   .2310911E-02
   .2517615E-02   .2422658E-02   .2005428E-02   .1357580E-02   .6114263E-03
  -.2933205E-03  -.1348340E-02  -.2462520E-02  -.3683791E-02  -.4880491E-02
  -.5722755E-02  -.5776295E-02  -.4936728E-02  -.3605823E-02  -.2273950E-02
  -.1217895E-02  -.6714199E-03  -.9082459E-03  -.1935933E-02  -.3563999E-02
  -.5594095E-02  -.7690131E-02  -.9748992E-02  -.1186091E-01  -.1378867E-01
  -.1516305E-01  -.1623729E-01  -.1759416E-01  -.1860902E-01  -.1792131E-01
  -.1571352E-01  -.1419728E-01  -.1530372E-01  -.1782640E-01  -.1794666E-01
  -.1357839E-01  -.8574229E-02  -.9432321E-02  -.1535597E-01  -.1725374E-01
  -.1153925E-01  -.7527667E-02  -.1296794E-01  -.1991373E-01  -.1592519E-01
  -.4203273E-02  -.1460716E-03  -.9365290E-02  -.1988026E-01  -.1813938E-01
  -.5436062E-02   .4611440E-02   .1963538E-02  -.8722423E-02  -.1357487E-01
  -.6205411E-02   .4035223E-02   .4424483E-02  -.4897041E-02  -.1282684E-01
  -.1245635E-01  -.7566682E-02  -.6172115E-02  -.1180272E-01  -.1886622E-01
  -.1677639E-01  -.3005842E-02   .1116019E-01   .1305702E-01   .3330368E-02
  -.6722459E-02  -.8048551E-02  -.4951069E-03   .8650663E-02   .1134103E-01
   .8035029E-02   .8304468E-02   .1818836E-01   .3022347E-01   .3230278E-01
   .2355513E-01   .1511973E-01   .1579034E-01   .2241923E-01   .2606743E-01
   .2348845E-01   .1946260E-01   .1865989E-01   .1946175E-01   .1763025E-01
   .1260470E-01   .7256071E-02   .3664400E-02   .1848283E-02   .1226813E-02
   .1633575E-02   .2931950E-02   .4469620E-02   .5227451E-02   .4701219E-02
   .3396750E-02   .2138032E-02   .1332363E-02   .5192929E-03  -.5148575E-03
  -.4425330E-03   .2350749E-02   .7161189E-02   .1125693E-01   .1295174E-01
   .1320836E-01   .1400545E-01   .1541735E-01   .1579814E-01   .1434087E-01
   .1227479E-01   .1126762E-01   .1138307E-01   .1170676E-01   .1203050E-01
   .1224228E-01   .1092447E-01   .6710206E-02   .1338223E-02  -.1209505E-02
   .5441714E-03   .3539159E-02   .3729437E-02   .9134715E-03  -.1258997E-02
   .1092617E-03   .3790729E-02   .6791155E-02   .8891977E-02   .1226432E-01
   .1648036E-01   .1791115E-01   .1491372E-01   .1086109E-01   .9377850E-02
   .9357443E-02   .8169402E-02   .7074972E-02   .8980812E-02   .1267337E-01
   .1433061E-01   .1350516E-01   .1373656E-01   .1684217E-01   .2013592E-01
   .2061477E-01   .1965204E-01   .2058152E-01   .2312064E-01   .2402933E-01
   .2255198E-01   .2115486E-01   .2101095E-01   .2051495E-01   .1833052E-01
   .1505878E-01   .1176108E-01   .8470818E-02   .5087027E-02   .2260194E-02
  -.1024535E-03  -.3240123E-02  -.7594850E-02  -.1153842E-01  -.1306081E-01
  -.1239089E-01  -.1175323E-01  -.1233964E-01  -.1298198E-01  -.1204319E-01
  -.9521193E-02  -.6789541E-02  -.5084211E-02  -.4416352E-02  -.3508928E-02
  -.1240100E-02   .2309058E-02   .6441999E-02   .1120909E-01   .1754848E-01
   .2573447E-01   .3471956E-01   .4307009E-01   .4939111E-01   .4974969E-01
   .3735025E-01   .9695336E-02  -.2556335E-01  -.5590358E-01  -.7341826E-01
  -.7582091E-01  -.6117623E-01  -.2929976E-01   .1077435E-01   .4219314E-01
   .5520070E-01   .5746692E-01   .6351413E-01   .7650813E-01   .8722708E-01
   .8815297E-01   .8067558E-01   .6853133E-01   .5222658E-01   .3315997E-01
   .1924447E-01   .2084752E-01   .3788435E-01   .5275976E-01   .4353870E-01
   .7544257E-02  -.3396701E-01  -.5932135E-01  -.6831231E-01  -.7569706E-01
  -.8973968E-01  -.1042056E+00  -.1076129E+00  -.9374398E-01  -.6535351E-01
  -.3264388E-01  -.7338857E-02   .3900990E-02   .4670257E-03  -.1364280E-01
  -.2691098E-01  -.2336499E-01   .6960088E-03   .2798679E-01   .3889402E-01
   .3459320E-01   .3124179E-01   .3724553E-01   .4781709E-01   .5717374E-01
   .6463066E-01   .6895002E-01   .6563855E-01   .5182140E-01   .2951888E-01
   .4704665E-02  -.1517437E-01  -.2437568E-01  -.2277507E-01  -.1660055E-01
  -.1263606E-01  -.1220167E-01  -.1196016E-01  -.9398885E-02  -.5283738E-02
  -.1536983E-02   .1484875E-02   .5241787E-02   .1068521E-01   .1599362E-01
   .1742065E-01   .1337224E-01   .6915070E-02   .3572192E-02   .6908894E-02
   .1520303E-01   .2315083E-01   .2681963E-01   .2611922E-01   .2301622E-01
   .1825341E-01   .1074434E-01  -.1354975E-03  -.1244922E-01  -.2253562E-01
  -.2778694E-01  -.2875202E-01  -.2851296E-01  -.2986306E-01  -.3352704E-01
  -.3821122E-01  -.4219285E-01  -.4431832E-01  -.4403211E-01  -.4135433E-01
  -.3642441E-01  -.2941100E-01  -.2081297E-01  -.1156446E-01  -.2286555E-02
   .7244094E-02   .1731201E-01   .2690473E-01   .3381663E-01   .3583564E-01
   .3205355E-01   .2354298E-01   .1307943E-01   .3638242E-02  -.3672168E-02
  -.9159322E-02  -.1240779E-01  -.1215778E-01  -.8022338E-02  -.1775203E-02
   .3976420E-02   .8093955E-02   .1111216E-01   .1353030E-01   .1467338E-01
   .1415306E-01   .1280645E-01   .1108775E-01   .8303334E-02   .4279251E-02
   .1343142E-03  -.2902964E-02  -.4208986E-02  -.3707564E-02  -.1866950E-02
   .3745572E-03   .2026703E-02   .3136237E-02   .4967606E-02   .8468498E-02
   .1312647E-01   .1727524E-01   .1950150E-01   .1969587E-01   .1885250E-01
   .1816398E-01   .1826627E-01   .1908337E-01   .2041570E-01   .2237513E-01
   .2486947E-01   .2740647E-01   .2973024E-01   .3192318E-01   .3399235E-01
   .3551197E-01   .3582099E-01   .3502872E-01   .3400067E-01   .3317571E-01
   .3229776E-01   .3094781E-01   .2863062E-01   .2489290E-01   .1930135E-01
   .1206730E-01   .4448081E-02  -.2093248E-02  -.7139624E-02  -.1134236E-01
  -.1520153E-01  -.1843559E-01  -.2028565E-01  -.2052477E-01  -.1987570E-01
  -.1923622E-01  -.1903678E-01  -.1901970E-01  -.1846109E-01  -.1688364E-01
  -.1430014E-01  -.1091765E-01  -.6889548E-02  -.2665931E-02   .7984191E-03
   .2934643E-02   .4037587E-02   .4533611E-02   .4356541E-02   .3446978E-02
   .2112779E-02   .7141633E-03  -.5808457E-03  -.1901377E-02  -.3507247E-02
  -.5290577E-02  -.6805584E-02  -.7710502E-02  -.8002906E-02  -.8006304E-02
  -.8141673E-02  -.8461082E-02  -.8626900E-02  -.8138822E-02  -.6934141E-02
  -.5041717E-02  -.2447626E-02   .3360557E-03   .2749933E-02   .4843327E-02
   .6998885E-02   .9373666E-02   .1159984E-01   .1318027E-01   .1391006E-01
   .1375640E-01   .1319865E-01   .1262216E-01   .1182429E-01   .1032008E-01
   .8144516E-02   .5797092E-02   .3738730E-02   .2274399E-02   .1465915E-02
   .1034569E-02   .6793233E-03   .1444470E-03  -.8183063E-03  -.2490233E-02
  -.4934315E-02  -.7719266E-02  -.1010974E-01  -.1153955E-01  -.1180902E-01
  -.1108463E-01  -.9823949E-02  -.8736328E-02  -.8553308E-02  -.9559938E-02
  -.1156631E-01  -.1386446E-01  -.1581940E-01  -.1723210E-01  -.1806702E-01
  -.1822297E-01  -.1772446E-01  -.1690088E-01  -.1611060E-01  -.1535424E-01
  -.1440068E-01  -.1325108E-01  -.1215414E-01  -.1129858E-01  -.1084604E-01
  -.1071707E-01  -.1079617E-01  -.1087118E-01  -.1086940E-01  -.1068154E-01
  -.1035642E-01  -.1028869E-01  -.1087473E-01  -.1209615E-01  -.1353083E-01
  -.1498243E-01  -.1632417E-01  -.1736447E-01  -.1777382E-01  -.1738724E-01
  -.1627311E-01  -.1462392E-01  -.1260532E-01  -.1026440E-01  -.7702324E-02
  -.5117469E-02  -.2616410E-02  -.9538464E-04   .2564677E-02   .5263312E-02
   .7755406E-02   .9927802E-02   .1178858E-01   .1329046E-01   .1424427E-01
   .1430654E-01   .1333403E-01   .1139621E-01   .8823547E-02   .6118840E-02
   .3821732E-02   .2185387E-02   .8004923E-03  -.9824906E-03  -.3292798E-02
  -.5756884E-02  -.7990916E-02  -.9937838E-02  -.1168348E-01  -.1308319E-01
  -.1371487E-01  -.1318266E-01  -.1147772E-01  -.8998814E-02  -.6353511E-02
  -.3952914E-02  -.2124344E-02  -.1338022E-02  -.2026686E-02  -.3963593E-02
  -.6307259E-02  -.8327700E-02  -.9720750E-02  -.1054743E-01  -.1102318E-01
  -.1131492E-01  -.1158041E-01  -.1195786E-01  -.1253297E-01  -.1329822E-01
  -.1427105E-01  -.1509630E-01  -.1529753E-01  -.1477362E-01  -.1388934E-01
  -.1309460E-01  -.1238144E-01  -.1146258E-01  -.1028286E-01  -.8882625E-02
  -.7325831E-02  -.5738142E-02  -.4288295E-02  -.2918488E-02  -.1516864E-02
  -.2038699E-03   .8173458E-03   .1153929E-02   .3452434E-03  -.1524802E-02
  -.3740953E-02  -.5722599E-02  -.7587675E-02  -.9635042E-02  -.1183834E-01
  -.1383536E-01  -.1539389E-01  -.1652736E-01  -.1731943E-01  -.1766111E-01
  -.1756611E-01  -.1732647E-01  -.1711944E-01  -.1704764E-01  -.1714256E-01
  -.1716283E-01  -.1699087E-01  -.1668614E-01  -.1605632E-01  -.1497512E-01
  -.1333037E-01  -.1107203E-01  -.8203071E-02  -.4774092E-02  -.1129571E-02
   .2256960E-02   .5267792E-02   .8121585E-02   .1098297E-01   .1363306E-01
   .1572943E-01   .1716090E-01   .1794889E-01   .1813520E-01   .1778009E-01
   .1696846E-01   .1588901E-01   .1467267E-01   .1338970E-01   .1213493E-01
   .1096407E-01   .9828589E-02   .8693625E-02   .7659399E-02   .6766087E-02
   .6053947E-02   .5743074E-02   .6029055E-02   .6657789E-02   .7035649E-02
   .6979856E-02   .6697345E-02   .6250754E-02   .5668203E-02   .4789940E-02
   .3444996E-02   .1774564E-02   .5773447E-04  -.1446780E-02  -.2596733E-02
  -.3399059E-02  -.3872506E-02  -.4042302E-02  -.3841971E-02  -.3296300E-02
  -.2638427E-02  -.1901346E-02  -.1011199E-02  -.1052355E-03   .8278429E-03
   .1996909E-02   .3325268E-02   .4587424E-02   .5514481E-02   .6007914E-02
   .6191892E-02   .6203652E-02   .6103501E-02   .5947796E-02   .5615078E-02
   .5107688E-02   .4613732E-02   .4208664E-02   .3855689E-02   .3479007E-02
   .3060781E-02   .2748351E-02   .2356931E-02   .1546029E-02   .4578658E-03
  -.5641450E-03  -.1529704E-02  -.2715801E-02  -.4221517E-02  -.5765152E-02
  -.7012795E-02  -.7704721E-02  -.7557253E-02  -.6677946E-02  -.5147436E-02
  -.3104914E-02  -.9766917E-03   .1094576E-02   .3128712E-02   .5124305E-02
   .7172748E-02   .9176194E-02   .1083035E-01   .1208649E-01   .1307851E-01
   .1382596E-01   .1452155E-01   .1511146E-01   .1543009E-01   .1536198E-01
   .1494224E-01   .1426688E-01   .1331138E-01   .1206965E-01   .1072853E-01
   .9473663E-02   .8386064E-02   .7556159E-02   .7001104E-02   .6805050E-02
   .6977971E-02   .7363500E-02   .7810220E-02   .8145005E-02   .8314922E-02
   .8475311E-02   .8789068E-02   .9142501E-02   .9242412E-02   .9113793E-02
   .9068302E-02   .9172407E-02   .9254945E-02   .9304386E-02   .9330479E-02
   .9313245E-02   .9151087E-02   .8751222E-02   .8051958E-02   .7126731E-02
   .6115920E-02   .5227367E-02   .4779276E-02   .4858196E-02   .5424878E-02
   .6427479E-02   .7649004E-02   .8942880E-02   .1018686E-01   .1121920E-01
   .1206435E-01   .1272937E-01   .1306981E-01   .1296423E-01   .1252665E-01
   .1186187E-01   .1099062E-01   .9931332E-02   .8727709E-02   .7478602E-02
   .6243452E-02   .4900951E-02   .3164141E-02   .1012844E-02  -.1071892E-02
  -.2658314E-02  -.3763257E-02  -.4557061E-02  -.4930855E-02  -.4609372E-02
  -.3563922E-02  -.2185788E-02  -.9403906E-03  -.1942719E-04   .7014928E-03
   .1365058E-02   .1877657E-02   .2134697E-02   .2173635E-02   .2032401E-02
   .1619996E-02   .7921409E-03  -.4414795E-03  -.2050883E-02  -.3948809E-02
  -.5899215E-02  -.7921131E-02  -.1000177E-01  -.1202328E-01  -.1377042E-01
  -.1503716E-01  -.1581466E-01  -.1623453E-01  -.1629509E-01  -.1589549E-01
  -.1516505E-01  -.1401016E-01  -.1220042E-01  -.9797740E-02  -.7007141E-02
  -.4054519E-02  -.1016758E-02   .1819103E-02   .4010294E-02   .5381063E-02
   .6064614E-02   .6106286E-02   .5348526E-02   .3941238E-02   .2186980E-02
   .2910264E-03  -.1609023E-02  -.3330169E-02  -.4699291E-02  -.5595921E-02
  -.6008283E-02  -.6002698E-02  -.5569714E-02  -.4830811E-02  -.4025806E-02
  -.3214781E-02  -.2372546E-02  -.1617784E-02  -.1142958E-02  -.1034959E-02
  -.1218895E-02  -.1745367E-02  -.2786348E-02  -.4300311E-02  -.5959659E-02
  -.7636462E-02  -.9436239E-02  -.1124965E-01  -.1277538E-01  -.1382188E-01
  -.1435256E-01  -.1436705E-01  -.1384928E-01  -.1278837E-01  -.1139749E-01
  -.9889266E-02  -.8173672E-02  -.6219230E-02  -.4116898E-02  -.1899134E-02
   .4234046E-03   .2739732E-02   .4874059E-02   .6723321E-02   .8099373E-02
   .8874886E-02   .9134320E-02   .8870881E-02   .8039720E-02   .6646432E-02
   .4664727E-02   .2163118E-02  -.5456073E-03  -.3077878E-02  -.5234203E-02
  -.6916783E-02  -.7982857E-02  -.8412929E-02  -.8368638E-02  -.7935423E-02
  -.7029554E-02  -.5818608E-02  -.4826668E-02  -.4301634E-02  -.3891676E-02
  -.3257668E-02  -.2392494E-02  -.1576455E-02  -.1077819E-02  -.9828957E-03
  -.1106818E-02  -.1230766E-02  -.1293623E-02  -.1473464E-02  -.2041796E-02
  -.3195524E-02  -.4472249E-02  -.4974241E-02  -.4397066E-02  -.3440667E-02
  -.3116357E-02  -.3665303E-02  -.4542469E-02  -.5370618E-02  -.6472163E-02
  -.8300843E-02  -.1062988E-01  -.1260515E-01  -.1345956E-01  -.1312951E-01
  -.1184296E-01  -.9887713E-02  -.7643151E-02  -.5202199E-02  -.2573564E-02
   .3363635E-04   .2151994E-02   .3293639E-02   .3343192E-02   .2767891E-02
   .2134945E-02   .1550718E-02   .7586014E-03  -.2637781E-03  -.1329642E-02
  -.2211993E-02  -.2830774E-02  -.3490830E-02  -.4401648E-02  -.5579962E-02
  -.6894318E-02  -.8033603E-02  -.8871711E-02  -.9609214E-02  -.1058656E-01
  -.1191514E-01  -.1322962E-01  -.1421042E-01  -.1517810E-01  -.1661260E-01
  -.1841428E-01  -.2011339E-01  -.2126857E-01  -.2195715E-01  -.2241696E-01
  -.2240905E-01  -.2157005E-01  -.1982560E-01  -.1738952E-01  -.1468171E-01
  -.1211177E-01  -.9583011E-02  -.6852768E-02  -.4136398E-02  -.1899462E-02
  -.3656324E-03   .6232929E-03   .1300247E-02   .1687583E-02   .1612383E-02
   .1014924E-02   .1082795E-04  -.1284781E-02  -.2567595E-02  -.3537853E-02
  -.4416672E-02  -.5582636E-02  -.6938881E-02  -.8093738E-02  -.8930728E-02
  -.9624843E-02  -.1033492E-01  -.1117567E-01  -.1204026E-01  -.1282000E-01
  -.1346334E-01  -.1407886E-01  -.1469680E-01  -.1531856E-01  -.1589855E-01
  -.1610835E-01  -.1575305E-01  -.1483376E-01  -.1348811E-01  -.1195680E-01
  -.1034547E-01  -.8757753E-02  -.7392486E-02  -.6345823E-02  -.5473558E-02
  -.4560668E-02  -.3656782E-02  -.2923638E-02  -.2625254E-02  -.2710958E-02
  -.2938944E-02  -.3336008E-02  -.3923007E-02  -.4548083E-02  -.5067366E-02
  -.5419579E-02  -.5662469E-02  -.5970884E-02  -.6413547E-02  -.6954403E-02
  -.7648720E-02  -.8557373E-02  -.9563002E-02  -.1056872E-01  -.1163396E-01
  -.1268080E-01  -.1350613E-01  -.1396512E-01  -.1394042E-01  -.1334877E-01
  -.1238180E-01  -.1111436E-01  -.9608275E-02  -.8030595E-02  -.6373122E-02
  -.4667862E-02  -.2851412E-02  -.8149188E-03   .1253485E-02   .3092704E-02
   .4725849E-02   .6353980E-02   .8023441E-02   .9455172E-02   .1037110E-01
   .1071330E-01   .1048704E-01   .9769833E-02   .8909134E-02   .8023482E-02
   .7004262E-02   .5991562E-02   .5362367E-02   .5377924E-02   .5918213E-02
   .6710590E-02   .7640054E-02   .8642826E-02   .9652756E-02   .1058679E-01
   .1137566E-01   .1192792E-01   .1222854E-01   .1217562E-01   .1169550E-01
   .1075873E-01   .9466373E-02   .7951068E-02   .6236952E-02   .4226190E-02
   .1875061E-02  -.5904400E-03  -.2938934E-02  -.5165738E-02  -.7478187E-02
  -.9859004E-02  -.1211837E-01  -.1401922E-01  -.1559958E-01  -.1698122E-01
  -.1803536E-01  -.1862933E-01  -.1880287E-01  -.1870451E-01  -.1830708E-01
  -.1753028E-01  -.1655944E-01  -.1540395E-01  -.1386550E-01  -.1196134E-01
  -.1001020E-01  -.8077747E-02  -.6160883E-02  -.4584833E-02  -.3533604E-02
  -.2920271E-02  -.2667679E-02  -.2635907E-02  -.2905509E-02  -.3513611E-02
  -.4216627E-02  -.4983666E-02  -.5840493E-02  -.6558375E-02  -.6844953E-02
  -.6497213E-02  -.5529535E-02  -.4000386E-02  -.1998279E-02   .3789959E-03
   .2905148E-02   .5217280E-02   .7043482E-02   .8188428E-02   .8459423E-02
   .7769683E-02   .6408325E-02   .4645805E-02   .2524979E-02   .2354132E-03
  -.2254639E-02  -.4932173E-02  -.7489758E-02  -.9691812E-02  -.1155679E-01
  -.1313890E-01  -.1431020E-01  -.1496480E-01  -.1500020E-01  -.1450423E-01
  -.1373814E-01  -.1254439E-01  -.1070636E-01  -.8458029E-02  -.6151323E-02
  -.4053957E-02  -.2102169E-02  -.5111277E-04   .1904679E-02   .2984900E-02
   .3076336E-02   .3120864E-02   .3095794E-02   .1799920E-02  -.7157401E-03
  -.2978313E-02  -.4278847E-02  -.5611264E-02  -.7926432E-02  -.1065362E-01
  -.1239717E-01  -.1258177E-01  -.1196788E-01  -.1145319E-01  -.1115772E-01
  -.1079052E-01  -.1020598E-01  -.9490161E-02  -.8807711E-02  -.8190666E-02
  -.7506403E-02  -.6673464E-02  -.5783625E-02  -.5224302E-02  -.5265510E-02
  -.5733879E-02  -.6398501E-02  -.7149899E-02  -.8002826E-02  -.8978139E-02
  -.9956561E-02  -.1071414E-01  -.1117513E-01  -.1153734E-01  -.1208391E-01
  -.1276147E-01  -.1308158E-01  -.1264436E-01  -.1167056E-01  -.1076497E-01
  -.1031126E-01  -.1003389E-01  -.9538543E-02  -.8718197E-02  -.7567076E-02
  -.6112015E-02  -.4551150E-02  -.3299463E-02  -.2732092E-02  -.2870545E-02
  -.3327792E-02  -.3776948E-02  -.4453373E-02  -.5841015E-02  -.7577725E-02
  -.8699906E-02  -.8996311E-02  -.9172881E-02  -.9630495E-02  -.9808760E-02
  -.8858665E-02  -.6935240E-02  -.5012535E-02  -.3696052E-02  -.2877052E-02
  -.2068145E-02  -.1006541E-02   .2070345E-03   .1211347E-02   .1894258E-02
   .2535824E-02   .3485340E-02   .4517648E-02   .5202043E-02   .5716027E-02
   .6442562E-02   .7521342E-02   .8805543E-02   .1020737E-01   .1166341E-01
   .1284222E-01   .1341220E-01   .1364207E-01   .1401258E-01   .1458748E-01
   .1514349E-01   .1534683E-01   .1516737E-01   .1487521E-01   .1451840E-01
   .1399030E-01   .1320356E-01   .1224816E-01   .1129942E-01   .1060307E-01
   .1028176E-01   .1002598E-01   .9456423E-02   .8759807E-02   .8456694E-02
   .8431332E-02   .7986425E-02   .6832347E-02   .5359726E-02   .4255067E-02
   .3685796E-02   .3401964E-02   .3272967E-02   .3380332E-02   .3787035E-02
   .4575696E-02   .6034655E-02   .8085788E-02   .1014106E-01   .1183121E-01
   .1316474E-01   .1431735E-01   .1516594E-01   .1535935E-01   .1472983E-01
   .1332031E-01   .1160145E-01   .1007670E-01   .8613247E-02   .7022288E-02
   .5362133E-02   .3837261E-02   .2695940E-02   .2067721E-02   .1776654E-02
   .1704480E-02   .2027692E-02   .2836056E-02   .4009106E-02   .5217535E-02
   .6168540E-02   .6698645E-02   .6802171E-02   .6648538E-02   .6291917E-02
   .5644754E-02   .4637287E-02   .3306774E-02   .1799858E-02   .3492628E-03
  -.1053871E-02  -.2470861E-02  -.3706608E-02  -.4438143E-02  -.4652332E-02
  -.4476739E-02  -.3829109E-02  -.2727289E-02  -.1336012E-02   .4313889E-03
   .2702535E-02   .5252695E-02   .7427484E-02   .8789024E-02   .9357703E-02
   .9403612E-02   .9422215E-02   .9444557E-02   .8983954E-02   .7545096E-02
   .5088577E-02   .2167478E-02  -.7063233E-03  -.3229767E-02  -.5430045E-02
  -.7380408E-02  -.8882293E-02  -.9912074E-02  -.1102332E-01  -.1268819E-01
  -.1469186E-01  -.1655410E-01  -.1800926E-01  -.1895264E-01  -.1924635E-01
  -.1874141E-01  -.1755543E-01  -.1585900E-01  -.1392327E-01  -.1231813E-01
  -.1124702E-01  -.1042626E-01  -.9880856E-02  -.9874430E-02  -.1011109E-01
  -.9402231E-02  -.7127878E-02  -.4609573E-02  -.3595846E-02  -.3671555E-02
  -.3063061E-02  -.1524481E-02  -.3667073E-03  -.3119011E-03  -.6435199E-03
  -.4827352E-03  -.4489644E-04   .9813287E-04   .2530018E-03   .1248295E-02
   .3036332E-02   .4596954E-02   .5190785E-02   .5233450E-02   .5603310E-02
   .6466325E-02   .7350904E-02   .7947129E-02   .8535273E-02   .9449736E-02
   .1051895E-01   .1109138E-01   .1083037E-01   .9991887E-02   .8739845E-02
   .7150000E-02   .5540792E-02   .4295167E-02   .3520545E-02   .2823620E-02
   .1815633E-02   .3680515E-03  -.1178373E-02  -.2692046E-02  -.4485518E-02
  -.6543733E-02  -.8420173E-02  -.9882350E-02  -.1107055E-01  -.1203864E-01
  -.1257664E-01  -.1253859E-01  -.1208103E-01  -.1140403E-01  -.1049664E-01
  -.9196547E-02  -.7530713E-02  -.5689899E-02  -.4120533E-02  -.3123885E-02
  -.2478160E-02  -.1831574E-02  -.1014325E-02  -.1292856E-03   .5095514E-03
   .8928260E-03   .1290511E-02   .1761547E-02   .2067396E-02   .1872731E-02
   .1222904E-02   .6649257E-03   .7029739E-03   .1198337E-02   .1577713E-02
   .1667103E-02   .1852101E-02   .2272751E-02   .2659479E-02   .2728772E-02
   .2193510E-02   .1117454E-02  -.1970959E-03  -.1508655E-02  -.2639936E-02
  -.3355637E-02  -.3598706E-02  -.3537537E-02  -.3215910E-02  -.2658371E-02
  -.1976800E-02  -.1260860E-02  -.6336069E-03  -.1644735E-03   .3477101E-03
   .8899725E-03   .1323885E-02   .1669654E-02   .2181767E-02   .2994475E-02
   .3919342E-02   .4837668E-02   .5863142E-02   .6956619E-02   .8057704E-02
   .9095563E-02   .1001950E-01   .1076588E-01   .1119367E-01   .1132043E-01
   .1129487E-01   .1134590E-01   .1153778E-01   .1163484E-01   .1155959E-01
   .1145459E-01   .1150781E-01   .1163289E-01   .1159444E-01   .1133854E-01
   .1097743E-01   .1070153E-01   .1056337E-01   .1062130E-01   .1088731E-01
   .1132873E-01   .1191588E-01   .1258307E-01   .1323141E-01   .1384953E-01
   .1435074E-01   .1454190E-01   .1449048E-01   .1439064E-01   .1407926E-01
   .1343688E-01   .1269782E-01   .1196216E-01   .1114487E-01   .1021097E-01
   .9217845E-02   .8341078E-02   .7481749E-02   .6425229E-02   .5124319E-02
   .3723762E-02   .2442090E-02   .1261460E-02   .3281938E-04  -.1315972E-02
  -.2782834E-02  -.4141642E-02  -.5028821E-02  -.5393960E-02  -.5471097E-02
  -.5443281E-02  -.5236507E-02  -.4598544E-02  -.3265642E-02  -.9857658E-03
   .2024854E-02   .5169382E-02   .8129450E-02   .1103904E-01   .1388602E-01
   .1625518E-01   .1782977E-01   .1840739E-01   .1776741E-01   .1604640E-01
   .1373492E-01   .1123340E-01   .8520185E-02   .5564529E-02   .2505753E-02
  -.4480073E-03  -.3161083E-02  -.5669693E-02  -.7888805E-02  -.9526681E-02
  -.1036918E-01  -.1036195E-01  -.9670851E-02  -.8475046E-02  -.6927958E-02
  -.5077828E-02  -.3167285E-02  -.1552628E-02  -.4250336E-03   .2987480E-03
   .8588907E-03   .1412323E-02   .2079499E-02   .2840099E-02   .3590389E-02
   .4529431E-02   .5822711E-02   .7356648E-02   .8950281E-02   .1029274E-01
   .1137435E-01   .1231256E-01   .1313897E-01   .1388501E-01   .1442788E-01
   .1468219E-01   .1471322E-01   .1448097E-01   .1374926E-01   .1253891E-01
   .1112916E-01   .9591381E-02   .7794088E-02   .5743801E-02   .3519797E-02
   .1182624E-02  -.1091864E-02  -.3102014E-02  -.4846905E-02  -.6312874E-02
  -.7261359E-02  -.7647078E-02  -.7696405E-02  -.7412250E-02  -.6670560E-02
  -.5722619E-02  -.4847864E-02  -.4090402E-02  -.3382970E-02  -.2614945E-02
  -.1771828E-02  -.9333171E-03  -.7418888E-04   .9547812E-03   .2127743E-02
   .3288969E-02   .4297963E-02   .5202014E-02   .5963311E-02   .6449891E-02
   .6775785E-02   .6912835E-02   .6743782E-02   .6389364E-02   .5981865E-02
   .5585601E-02   .5180116E-02   .4602858E-02   .3714890E-02   .2541419E-02
   .1141571E-02  -.2634172E-03  -.1539220E-02  -.2658319E-02  -.3646745E-02
  -.4437248E-02  -.5054745E-02  -.5473027E-02  -.5567012E-02  -.5313219E-02
  -.4837346E-02  -.4270479E-02  -.3665790E-02  -.3017115E-02  -.2486414E-02
  -.2162906E-02  -.1805519E-02  -.1247613E-02  -.8518423E-03  -.8639005E-03
  -.1080705E-02  -.1322445E-02  -.1806604E-02  -.2818810E-02  -.4308015E-02
  -.5993688E-02  -.7550109E-02  -.8755167E-02  -.9502263E-02  -.9842469E-02
  -.9848243E-02  -.9449332E-02  -.8633415E-02  -.7595379E-02  -.6843431E-02
  -.6542394E-02  -.6238070E-02  -.5742137E-02  -.5359035E-02  -.5164307E-02
  -.4981098E-02  -.4693379E-02  -.4458694E-02  -.4440978E-02  -.4748196E-02
  -.5258946E-02  -.5750960E-02  -.6049915E-02  -.5989521E-02  -.5349276E-02
  -.4323046E-02  -.3102026E-02  -.1454994E-02   .7576319E-03   .3215252E-02
   .5402868E-02   .7058239E-02   .8117920E-02   .8645087E-02   .8705384E-02
   .8193312E-02   .7106505E-02   .5681542E-02   .4412912E-02   .3677481E-02
   .3331141E-02   .3110797E-02   .2998322E-02   .3116332E-02   .3572991E-02
   .4339963E-02   .5473717E-02   .7162035E-02   .9249202E-02   .1120817E-01
   .1290487E-01   .1459112E-01   .1621270E-01   .1753879E-01   .1841093E-01
   .1901487E-01   .1957758E-01   .2000637E-01   .2005399E-01   .1958177E-01
   .1868807E-01   .1755453E-01   .1617833E-01   .1453543E-01   .1281504E-01
   .1124586E-01   .9911427E-02   .8719706E-02   .7726763E-02   .6985480E-02
   .6267872E-02   .5542215E-02   .4909524E-02   .4278617E-02   .3658295E-02
   .3256243E-02   .3325084E-02   .3889410E-02   .4712675E-02   .5763705E-02
   .7108630E-02   .8535833E-02   .9793617E-02   .1101751E-01   .1250593E-01
   .1394984E-01   .1473638E-01   .1491896E-01   .1539158E-01   .1626421E-01
   .1670174E-01   .1630033E-01   .1538731E-01   .1440220E-01   .1345898E-01
   .1226804E-01   .1073459E-01   .9148902E-02   .7739355E-02   .6380821E-02
   .5108466E-02   .4032361E-02   .3381081E-02   .3440629E-02   .4013256E-02
   .4776689E-02   .5618784E-02   .6470975E-02   .7211273E-02   .7531909E-02
   .7261044E-02   .6580987E-02   .5689642E-02   .4403649E-02   .2685114E-02
   .7165097E-03  -.1306097E-02  -.3189018E-02  -.5034502E-02  -.6779539E-02
  -.8248313E-02  -.9338712E-02  -.9982491E-02  -.1014273E-01  -.9871271E-02
  -.9420359E-02  -.8957266E-02  -.8464431E-02  -.7869732E-02  -.7368665E-02
  -.7155022E-02  -.7228182E-02  -.7456683E-02  -.7670263E-02  -.7932562E-02
  -.8315387E-02  -.8874722E-02  -.9530324E-02  -.1015676E-01  -.1086578E-01
  -.1180366E-01  -.1292653E-01  -.1392495E-01  -.1464108E-01  -.1510380E-01
  -.1523249E-01  -.1489521E-01  -.1401900E-01  -.1274900E-01  -.1127012E-01
  -.9624525E-02  -.7857789E-02  -.6166839E-02  -.4744320E-02  -.3612678E-02
  -.2814263E-02  -.2347037E-02  -.2189964E-02  -.2489184E-02  -.3373055E-02
  -.4815143E-02  -.6820940E-02  -.9277415E-02  -.1173140E-01  -.1384624E-01
  -.1552322E-01  -.1659190E-01  -.1680846E-01  -.1624822E-01  -.1528624E-01
  -.1425117E-01  -.1298180E-01  -.1133731E-01  -.9484390E-02  -.7662251E-02
  -.5931869E-02  -.4161867E-02  -.2309039E-02  -.3557489E-03   .1605317E-02
   .3292090E-02   .4471510E-02   .5102442E-02   .5141690E-02   .4615025E-02
   .3678357E-02   .2531303E-02   .1225428E-02  -.2077072E-03  -.1648164E-02
  -.2874381E-02  -.3703495E-02  -.4059961E-02  -.4143457E-02  -.4135236E-02
  -.3906031E-02  -.3246117E-02  -.2275067E-02  -.1118524E-02   .2560421E-03
   .1856629E-02   .3661308E-02   .5614869E-02   .7620142E-02   .9552783E-02
   .1118628E-01   .1240549E-01   .1320327E-01   .1366599E-01   .1388802E-01
   .1379132E-01   .1338990E-01   .1280129E-01   .1213952E-01   .1146898E-01
   .1076706E-01   .9996681E-02   .9252153E-02   .8578151E-02   .7871087E-02
   .7024937E-02   .5857371E-02   .4452097E-02   .3309914E-02   .2674106E-02
   .2198864E-02   .1655784E-02   .1011262E-02   .5055172E-03   .4665890E-03
   .9432056E-03   .1823729E-02   .3004538E-02   .4193568E-02   .5196613E-02
   .6138495E-02   .7050303E-02   .7785313E-02   .8348299E-02   .8720820E-02
   .8742432E-02   .8235054E-02   .7210607E-02   .5873634E-02   .4297903E-02
   .2478490E-02   .3591525E-03  -.1853272E-02  -.3802134E-02  -.5353583E-02
  -.6416967E-02  -.7000111E-02  -.7237829E-02  -.7292203E-02  -.7091567E-02
  -.6563570E-02  -.5752781E-02  -.4579204E-02  -.3009475E-02  -.1199457E-02
   .7803294E-03   .2886161E-02   .4949072E-02   .6938907E-02   .8811269E-02
   .1029872E-01   .1116486E-01   .1156849E-01   .1167810E-01   .1137601E-01
   .1059066E-01   .9468912E-02   .8116560E-02   .6498008E-02   .4664654E-02
   .3007939E-02   .1691850E-02   .4595499E-03  -.6488885E-03  -.1474939E-02
  -.1781009E-02  -.1392306E-02  -.4346371E-03   .7574825E-03   .2109800E-02
   .3669019E-02   .5250042E-02   .6633768E-02   .7756875E-02   .8399430E-02
   .8469416E-02   .8331030E-02   .8387343E-02   .8484970E-02   .8181915E-02
   .7376941E-02   .6311936E-02   .5239221E-02   .4213395E-02   .3168292E-02
   .2104723E-02   .1132217E-02   .2810057E-03  -.5511379E-03  -.1419441E-02
  -.2339599E-02  -.3201852E-02  -.3857542E-02  -.4210354E-02  -.4355799E-02
  -.4329260E-02  -.3987895E-02  -.3046183E-02  -.1427724E-02   .6676127E-03
   .2841829E-02   .4854619E-02   .6619310E-02   .8090865E-02   .9211154E-02
   .9731880E-02   .9653593E-02   .9266617E-02   .8864689E-02   .8530646E-02
   .8159457E-02   .7689261E-02   .7176223E-02   .6689449E-02   .6292086E-02
   .5873539E-02   .5414398E-02   .5068276E-02   .4881933E-02   .4726817E-02
   .4712237E-02   .4973015E-02   .5235655E-02   .5347050E-02   .5434957E-02
   .5515496E-02   .5407056E-02   .4984408E-02   .4458445E-02   .4045315E-02
   .3686865E-02   .3267139E-02   .2778024E-02   .2378664E-02   .2120607E-02
   .1749225E-02   .1098272E-02   .2345710E-03  -.7572249E-03  -.1895611E-02
  -.3045543E-02  -.4124851E-02  -.5192506E-02  -.6216511E-02  -.7024460E-02
  -.7449244E-02  -.7496494E-02  -.7186767E-02  -.6605103E-02  -.5854852E-02
  -.5036035E-02  -.4319282E-02  -.3826587E-02  -.3493576E-02  -.3310897E-02
  -.3270437E-02  -.3346834E-02  -.3529358E-02  -.3787867E-02  -.3914377E-02
  -.3775336E-02  -.3484691E-02  -.3140164E-02  -.2750197E-02  -.2348658E-02
  -.1999876E-02  -.1662723E-02  -.1267338E-02  -.7540010E-03  -.2621034E-03
   .6929242E-05  -.1043188E-03  -.4314033E-03  -.8164994E-03  -.1341836E-02
  -.1957519E-02  -.2366646E-02  -.2488702E-02  -.2387562E-02  -.2041541E-02
  -.1434520E-02  -.5793392E-03   .3584078E-03   .1217279E-02   .1948701E-02
   .2643237E-02   .3213434E-02   .3522071E-02   .3644706E-02   .3583658E-02
   .3364487E-02   .3154913E-02   .3049704E-02   .2898453E-02   .2637407E-02
   .2493086E-02   .2570129E-02   .2764035E-02   .2836172E-02   .2717129E-02
   .2426020E-02   .1866116E-02   .9922951E-03  -.2399809E-03  -.1628390E-02
  -.2966788E-02  -.4290402E-02  -.5539715E-02  -.6593629E-02  -.7459400E-02
  -.8097267E-02  -.8408632E-02  -.8350093E-02  -.7886600E-02  -.7221098E-02
  -.6559664E-02  -.5759647E-02  -.4747553E-02  -.3700490E-02  -.2805615E-02
  -.2107499E-02  -.1585601E-02  -.1255509E-02  -.1104670E-02  -.1280602E-02
  -.1932764E-02  -.2848051E-02  -.3767491E-02  -.4708339E-02  -.5620157E-02
  -.6303916E-02  -.6627872E-02  -.6556696E-02  -.6169311E-02  -.5550657E-02
  -.4645596E-02  -.3531429E-02  -.2292118E-02  -.9954293E-03   .3196295E-03
   .1668732E-02   .2944676E-02   .4045816E-02   .4901544E-02   .5425787E-02
   .5715413E-02   .5920853E-02   .5933673E-02   .5563229E-02   .4868321E-02
   .4107357E-02   .3438814E-02   .2911913E-02   .2579087E-02   .2527364E-02
   .2580267E-02   .2600276E-02   .2707426E-02   .3013660E-02   .3417549E-02
   .3847094E-02   .4353600E-02   .4903840E-02   .5378840E-02   .5715441E-02
   .5943200E-02   .6102104E-02   .6008568E-02   .5571804E-02   .4966861E-02
   .4447282E-02   .4052074E-02   .3771402E-02   .3767955E-02   .3938260E-02
   .4032437E-02   .4163331E-02   .4513598E-02   .4907031E-02   .5036460E-02
   .4889971E-02   .4520646E-02   .3917214E-02   .3244151E-02   .2505148E-02
   .1501754E-02   .3012033E-03  -.9366843E-03  -.2107898E-02  -.3230842E-02
  -.4374580E-02  -.5525700E-02  -.6565181E-02  -.7517092E-02  -.8404988E-02
  -.9002221E-02  -.9250186E-02  -.9336556E-02  -.9288468E-02  -.8917883E-02
  -.8151734E-02  -.7220989E-02  -.6392218E-02  -.5778261E-02  -.5262081E-02
  -.4777063E-02  -.4489668E-02  -.4510597E-02  -.4693564E-02  -.4941183E-02
  -.5246861E-02  -.5634899E-02  -.6119725E-02  -.6580490E-02  -.7010798E-02
  -.7417697E-02  -.7977558E-02  -.8682509E-02  -.9406432E-02  -.1007751E-01
  -.1062039E-01  -.1097923E-01  -.1098414E-01  -.1062721E-01  -.9981763E-02
  -.8988892E-02  -.7809584E-02  -.6699153E-02  -.5636409E-02  -.4495432E-02
  -.3471831E-02  -.2850738E-02  -.2638327E-02  -.2688297E-02  -.2884316E-02
  -.3279845E-02  -.3874346E-02  -.4632936E-02  -.5477111E-02  -.6349139E-02
  -.7246186E-02  -.8172565E-02  -.9087024E-02  -.9893878E-02  -.1056645E-01
  -.1107807E-01  -.1148698E-01  -.1182062E-01  -.1209460E-01  -.1231815E-01
  -.1246135E-01  -.1243346E-01  -.1220051E-01  -.1174170E-01  -.1110879E-01
  -.1032553E-01  -.9351879E-02  -.8270471E-02  -.7136736E-02  -.5968252E-02
  -.4724427E-02  -.3350420E-02  -.1938513E-02  -.4743975E-03   .1056868E-02
   .2622636E-02   .4134458E-02   .5556213E-02   .6791927E-02   .7658482E-02
   .8086282E-02   .8170920E-02   .8087884E-02   .7866057E-02   .7468649E-02
   .6898523E-02   .6123870E-02   .5313413E-02   .4645134E-02   .4090114E-02
   .3657149E-02   .3323391E-02   .3048485E-02   .2910122E-02   .2953624E-02
   .3265857E-02   .3852526E-02   .4549961E-02   .5296119E-02   .6200195E-02
   .7307779E-02   .8613419E-02   .1002887E-01   .1133644E-01   .1239543E-01
   .1311248E-01   .1354628E-01   .1358918E-01   .1310783E-01   .1216003E-01
   .1076097E-01   .8972083E-02   .6818615E-02   .4362970E-02   .1947921E-02
  -.3168452E-03  -.2502182E-02  -.4443696E-02  -.5913812E-02  -.6900446E-02
  -.7436759E-02  -.7675876E-02  -.7740924E-02  -.7547180E-02  -.7177868E-02
  -.6690767E-02  -.6081979E-02  -.5411016E-02  -.5029258E-02  -.5078083E-02
  -.5308000E-02  -.5469575E-02  -.5454938E-02  -.5309663E-02  -.5000797E-02
  -.4529191E-02  -.3978007E-02  -.3295298E-02  -.2214478E-02  -.7485993E-03
   .6329437E-03   .1429835E-02   .1638464E-02   .1728226E-02   .1907249E-02
   .2270897E-02   .2552788E-02   .2319468E-02   .1538678E-02   .6334203E-03
  -.7596705E-04  -.5034558E-03  -.7655362E-03  -.1033489E-02  -.1307877E-02
  -.1493051E-02  -.1324564E-02  -.6506477E-03   .3251675E-03   .1348733E-02
   .2419065E-02   .3377554E-02   .3930410E-02   .4071423E-02   .3909538E-02
   .3387411E-02   .2722245E-02   .2245534E-02   .2130839E-02   .2421674E-02
   .2971722E-02   .3370377E-02   .3477008E-02   .3740618E-02   .4492156E-02
   .5611994E-02   .6608176E-02   .7231987E-02   .7640755E-02   .7938285E-02
   .8232004E-02   .8355618E-02   .8166131E-02   .7876008E-02   .7492099E-02
   .6740787E-02   .5792125E-02   .4920715E-02   .4067430E-02   .3057912E-02
   .1986426E-02   .1020119E-02   .2631164E-03  -.2713219E-03  -.5895647E-03
  -.7270091E-03  -.5869675E-03  -.8713195E-04   .5295059E-03   .1002113E-02
   .1150487E-02   .8978270E-03   .4129409E-03  -.1963724E-03  -.1076334E-02
  -.2181264E-02  -.3310922E-02  -.4311982E-02  -.5234680E-02  -.6018355E-02
  -.6717572E-02  -.7364546E-02  -.7818826E-02  -.8089985E-02  -.8182222E-02
  -.8066883E-02  -.7823853E-02  -.7559290E-02  -.7256947E-02  -.6732979E-02
  -.6154257E-02  -.5771018E-02  -.5581540E-02  -.5552295E-02  -.5707546E-02
  -.5962321E-02  -.6347813E-02  -.6997061E-02  -.7994416E-02  -.9153982E-02
  -.1001874E-01  -.1050073E-01  -.1079459E-01  -.1102402E-01  -.1117514E-01
  -.1117174E-01  -.1091433E-01  -.1057183E-01  -.1022771E-01  -.9821329E-02
  -.9373251E-02  -.8871881E-02  -.8229432E-02  -.7458169E-02  -.6703020E-02
  -.6009786E-02  -.5345019E-02  -.4718487E-02  -.4300033E-02  -.4329139E-02
  -.4855229E-02  -.5795613E-02  -.7020434E-02  -.8387871E-02  -.9734692E-02
  -.1091152E-01  -.1177528E-01  -.1234951E-01  -.1287670E-01  -.1339991E-01
  -.1371503E-01  -.1358738E-01  -.1298115E-01  -.1213053E-01  -.1127260E-01
  -.1043529E-01  -.9416482E-02  -.8200777E-02  -.6979976E-02  -.5700529E-02
  -.4246939E-02  -.2732862E-02  -.1454689E-02  -.4744185E-03   .4237031E-03
   .1355257E-02   .2129830E-02   .2659893E-02   .2962480E-02   .3059480E-02
   .3016339E-02   .2763104E-02   .2278283E-02   .1752269E-02   .1175203E-02
   .3665861E-03  -.6408360E-03  -.1706155E-02  -.2882370E-02  -.4295686E-02
  -.5801298E-02  -.7198314E-02  -.8413521E-02  -.9500153E-02  -.1055026E-01
  -.1152337E-01  -.1230358E-01  -.1277738E-01  -.1286267E-01  -.1248853E-01
  -.1177358E-01  -.1091054E-01  -.1004227E-01  -.9307615E-02  -.8744077E-02
  -.8302365E-02  -.7913585E-02  -.7627691E-02  -.7507594E-02  -.7592139E-02
  -.7736264E-02  -.7765860E-02  -.7813829E-02  -.7911993E-02  -.7976809E-02
  -.7866404E-02  -.7559118E-02  -.7100507E-02  -.6512479E-02  -.5828577E-02
  -.5039659E-02  -.4195544E-02  -.3366819E-02  -.2646152E-02  -.2214168E-02
  -.2262709E-02  -.2811683E-02  -.3710935E-02  -.4791564E-02  -.5981934E-02
  -.7160540E-02  -.8192511E-02  -.9082776E-02  -.9940852E-02  -.1073698E-01
  -.1128296E-01  -.1149103E-01  -.1141951E-01  -.1103926E-01  -.1027540E-01
  -.9133172E-02  -.7721656E-02  -.6205785E-02  -.4569041E-02  -.2690667E-02
  -.6354289E-03   .1318205E-02   .2949650E-02   .4277227E-02   .5402625E-02
   .6428109E-02   .7144820E-02   .7272799E-02   .6765155E-02   .5829039E-02
   .4573125E-02   .2976107E-02   .1241408E-02  -.4082945E-03  -.1748857E-02
  -.2654875E-02  -.3213525E-02  -.3489634E-02  -.3330526E-02  -.2775710E-02
  -.1960199E-02  -.8155098E-03   .7747402E-03   .2673525E-02   .4568044E-02
   .6256157E-02   .7706180E-02   .8882962E-02   .9660153E-02   .1000663E-01
   .9829261E-02   .9135996E-02   .7953598E-02   .6362869E-02   .4629254E-02
   .3026868E-02   .1567760E-02   .3282933E-03  -.4960746E-03  -.9660029E-03
  -.1392075E-02  -.1963867E-02  -.2677217E-02  -.3348380E-02  -.3770296E-02
  -.3928715E-02  -.3938552E-02  -.4024981E-02  -.4149986E-02  -.4163793E-02
  -.3946910E-02  -.3444680E-02  -.2765330E-02  -.2030589E-02  -.1104836E-02
   .2448584E-03   .1880099E-02   .3456681E-02   .4893670E-02   .6363833E-02
   .7969533E-02   .9543522E-02   .1082447E-01   .1172478E-01   .1228149E-01
   .1262682E-01   .1278681E-01   .1260002E-01   .1219391E-01   .1178271E-01
   .1151304E-01   .1140216E-01   .1145161E-01   .1162773E-01   .1183666E-01
   .1195057E-01   .1219419E-01   .1260968E-01   .1284971E-01   .1274740E-01
   .1262454E-01   .1278447E-01   .1316891E-01   .1354927E-01   .1387636E-01
   .1428452E-01   .1480128E-01   .1533460E-01   .1578602E-01   .1609282E-01
   .1617159E-01   .1602242E-01   .1555191E-01   .1466900E-01   .1359466E-01
   .1249873E-01   .1140554E-01   .1025724E-01   .9008240E-02   .7843865E-02
   .6900791E-02   .6091870E-02   .5320299E-02   .4590377E-02   .3955507E-02
   .3451814E-02   .3035170E-02   .2586150E-02   .1960499E-02   .1352373E-02
   .1030567E-02   .1049077E-02   .1495197E-02   .2379288E-02   .3530491E-02
   .4965046E-02   .6686577E-02   .8488148E-02   .1015471E-01   .1150151E-01
   .1261142E-01   .1365290E-01   .1454928E-01   .1516464E-01   .1557813E-01
   .1586753E-01   .1589634E-01   .1562280E-01   .1514974E-01   .1465889E-01
   .1435654E-01   .1406346E-01   .1358096E-01   .1308380E-01   .1269498E-01
   .1237317E-01   .1217576E-01   .1212231E-01   .1214257E-01   .1200424E-01
   .1159110E-01   .1112603E-01   .1072271E-01   .1031453E-01   .1004522E-01
   .9983691E-02   .1010961E-01   .1040227E-01   .1082785E-01   .1137096E-01
   .1203630E-01   .1258219E-01   .1295363E-01   .1307737E-01   .1286939E-01
   .1230449E-01   .1131633E-01   .9918906E-02   .8283168E-02   .6514715E-02
   .4655042E-02   .2865111E-02   .1344202E-02   .1065867E-03  -.9036902E-03
  -.1620340E-02  -.2054119E-02  -.2305086E-02  -.2378339E-02  -.2310798E-02
  -.2240394E-02  -.2313712E-02  -.2555441E-02  -.2921944E-02  -.3355732E-02
  -.3786850E-02  -.4202465E-02  -.4464810E-02  -.4461072E-02  -.4286258E-02
  -.4176014E-02  -.4211998E-02  -.4269842E-02  -.4268231E-02  -.4362583E-02
  -.4577584E-02  -.4802499E-02  -.5089535E-02  -.5408855E-02  -.5688723E-02
  -.5898879E-02  -.6107386E-02  -.6367978E-02  -.6640744E-02  -.6902324E-02
  -.7083458E-02  -.7045309E-02  -.6900534E-02  -.6782283E-02  -.6645562E-02
  -.6265060E-02  -.5577998E-02  -.4699354E-02  -.3758376E-02  -.2896752E-02
  -.2262823E-02  -.1944176E-02  -.2064195E-02  -.2556225E-02  -.3244857E-02
  -.4324581E-02  -.5721349E-02  -.7103481E-02  -.8448895E-02  -.9728097E-02
  -.1101137E-01  -.1239835E-01  -.1373537E-01  -.1477257E-01  -.1563554E-01
  -.1656618E-01  -.1736660E-01  -.1751284E-01  -.1685211E-01  -.1561821E-01
  -.1406593E-01  -.1231633E-01  -.1038711E-01  -.8358844E-02  -.6439447E-02
  -.4707729E-02  -.3185146E-02  -.1871855E-02  -.8439474E-03  -.2386030E-03
  -.4776237E-04  -.7449786E-04  -.2340446E-03  -.6369730E-03  -.1438129E-02
  -.2706431E-02  -.4273137E-02  -.5852559E-02  -.7412974E-02  -.8903860E-02
  -.1016908E-01  -.1122690E-01  -.1220620E-01  -.1310178E-01  -.1372625E-01
  -.1385119E-01  -.1353350E-01  -.1288810E-01  -.1199366E-01  -.1089737E-01
  -.9681872E-02  -.8477164E-02  -.7312194E-02  -.6169959E-02  -.5221424E-02
  -.4478346E-02  -.3814332E-02  -.3060142E-02  -.2206901E-02  -.1481828E-02
  -.9851392E-03  -.5964636E-03  -.2986917E-03  -.6222982E-04   .2084224E-03
   .5230884E-03   .7544021E-03   .7647357E-03   .6308336E-03   .3502534E-03
  -.8174288E-04  -.5352894E-03  -.9267076E-03  -.1176157E-02  -.1238324E-02
  -.1126101E-02  -.9478465E-03  -.7906140E-03  -.7366729E-03  -.6785779E-03
  -.5975296E-03  -.6770346E-03  -.9385385E-03  -.1207908E-02  -.1403471E-02
  -.1451099E-02  -.1353759E-02  -.1313897E-02  -.1431687E-02  -.1636415E-02
  -.1874162E-02  -.2007330E-02  -.2132171E-02  -.2335024E-02  -.2514991E-02
  -.2646303E-02  -.2605750E-02  -.2248554E-02  -.1806425E-02  -.1450035E-02
  -.1164951E-02  -.8020586E-03  -.3142935E-03   .2018857E-03   .7625215E-03
   .1397200E-02   .2012037E-02   .2633979E-02   .3453956E-02   .4442389E-02
   .5442179E-02   .6407832E-02   .7300908E-02   .8107519E-02   .8702401E-02
   .9066720E-02   .9338258E-02   .9547043E-02   .9664567E-02   .9726109E-02
   .9683309E-02   .9450413E-02   .9203623E-02   .9000140E-02   .8676591E-02
   .8211725E-02   .7633217E-02   .6942876E-02   .6139925E-02   .5329436E-02
   .4624164E-02   .4030594E-02   .3601032E-02   .3461778E-02   .3631469E-02
   .4035332E-02   .4662136E-02   .5428685E-02   .6243041E-02   .7115459E-02
   .8117109E-02   .9021553E-02   .9624556E-02   .9890001E-02   .9889796E-02
   .9607865E-02   .9006702E-02   .8161644E-02   .6847010E-02   .5138395E-02
   .3446527E-02   .1880073E-02   .2505069E-03  -.1319287E-02  -.2528966E-02
  -.3367767E-02  -.3807111E-02  -.3878198E-02  -.3735911E-02  -.3530822E-02
  -.3198630E-02  -.2634320E-02  -.2112043E-02  -.1869990E-02  -.1856361E-02
  -.1814033E-02  -.1628384E-02  -.1377913E-02  -.1092991E-02  -.7324569E-03
  -.3718759E-03  -.2454929E-03  -.2888548E-03  -.1843885E-03   .2008894E-03
   .7461643E-03   .1395365E-02   .2204430E-02   .3089792E-02   .4025791E-02
   .5087871E-02   .6014450E-02   .6752596E-02   .7538076E-02   .8194236E-02
   .8484541E-02   .8494794E-02   .8352613E-02   .8166302E-02   .7916226E-02
   .7411964E-02   .6573201E-02   .5472288E-02   .4212250E-02   .2748878E-02
   .1197155E-02  -.2158044E-03  -.1438366E-02  -.2554877E-02  -.3551175E-02
  -.4175942E-02  -.4196111E-02  -.3753019E-02  -.3037304E-02  -.2141499E-02
  -.1170683E-02  -.1373145E-03   .9785595E-03   .2081581E-02   .3169121E-02
   .4073531E-02   .4611089E-02   .4855017E-02   .4952646E-02   .4866081E-02
   .4442306E-02   .3929093E-02   .3500164E-02   .3122314E-02   .2772248E-02
   .2541978E-02   .2532010E-02   .2775046E-02   .3163850E-02   .3552409E-02
   .3797786E-02   .3940581E-02   .4028493E-02   .4000897E-02   .3923371E-02
   .3808758E-02   .3683669E-02   .3557141E-02   .3409552E-02   .3164665E-02
   .2775257E-02   .2348382E-02   .2131217E-02   .2131098E-02   .2100279E-02
   .1961205E-02   .1795774E-02   .1645744E-02   .1486459E-02   .1260308E-02
   .1067173E-02   .1082697E-02   .1342620E-02   .1943855E-02   .2827433E-02
   .3948757E-02   .5382299E-02   .7111563E-02   .8874581E-02   .1047236E-01
   .1193102E-01   .1309298E-01   .1375581E-01   .1395315E-01   .1366367E-01
   .1296620E-01   .1209384E-01   .1109076E-01   .9867926E-02   .8600355E-02
   .7378813E-02   .6134476E-02   .4893690E-02   .3698700E-02   .2569003E-02
   .1430754E-02   .2273675E-03  -.8355398E-03  -.1651538E-02  -.2440850E-02
  -.3266612E-02  -.3893802E-02  -.4283594E-02  -.4530353E-02  -.4577040E-02
  -.4460678E-02  -.4149380E-02  -.3711868E-02  -.3334881E-02  -.2977223E-02
  -.2512694E-02  -.1957132E-02  -.1379033E-02  -.7670151E-03  -.7135020E-04
   .8041264E-03   .1832004E-02   .2775134E-02   .3542802E-02   .4317816E-02
   .5062104E-02   .5728441E-02   .6345628E-02   .6702550E-02   .6692380E-02
   .6368896E-02   .5739944E-02   .4789714E-02   .3677283E-02   .2579155E-02
   .1538292E-02   .5095941E-03  -.4395116E-03  -.1165848E-02  -.1675640E-02
  -.2029617E-02  -.2229581E-02  -.2179797E-02  -.1965488E-02  -.1711674E-02
  -.1410145E-02  -.1148981E-02  -.8470852E-03  -.4577956E-03  -.5513561E-04
   .3010845E-03   .6148187E-03   .8912428E-03   .1091123E-02   .1164920E-02
   .1146412E-02   .1062740E-02   .9172956E-03   .7463404E-03   .5513426E-03
   .2372651E-03  -.1875411E-03  -.6481294E-03  -.1086721E-02  -.1530102E-02
  -.2055620E-02  -.2534345E-02  -.2905170E-02  -.3213988E-02  -.3456696E-02
  -.3619888E-02  -.3733207E-02  -.3810001E-02  -.3860531E-02  -.3779034E-02
  -.3613945E-02  -.3401233E-02  -.3050584E-02  -.2606777E-02  -.2047645E-02
  -.1373118E-02  -.6429134E-03   .9232714E-04   .7592276E-03   .1292001E-02
   .1752575E-02   .2181352E-02   .2432098E-02   .2549208E-02   .2557106E-02
   .2439338E-02   .2137313E-02   .1643546E-02   .1113372E-02   .5848390E-03
  -.1399601E-03  -.1034025E-02  -.1850199E-02  -.2609843E-02  -.3507680E-02
  -.4547949E-02  -.5530058E-02  -.6326024E-02  -.7000448E-02  -.7410270E-02
  -.7422658E-02  -.7727252E-02  -.9243759E-02  -.1134777E-01  -.1204892E-01
  -.1032880E-01  -.8125447E-02  -.8318118E-02  -.1077404E-01  -.1206589E-01
  -.9736544E-02  -.5790703E-02  -.3957801E-02  -.4978124E-02  -.6532547E-02
  -.6561477E-02  -.5147469E-02  -.3674356E-02  -.3180894E-02  -.3819147E-02
  -.5081440E-02  -.6177728E-02  -.6585775E-02  -.6375524E-02  -.6165487E-02
  -.6383359E-02  -.6820748E-02  -.6877063E-02  -.5966003E-02  -.4529779E-02
  -.4028059E-02  -.5113929E-02  -.6616897E-02  -.6880550E-02  -.5852730E-02
  -.4956521E-02  -.5061973E-02  -.5482674E-02  -.5613744E-02  -.5953407E-02
  -.6864869E-02  -.7640716E-02  -.7435136E-02  -.6476159E-02  -.5919704E-02
  -.6475204E-02  -.7686705E-02  -.8717682E-02  -.8925972E-02  -.8244835E-02
  -.7275957E-02  -.6672397E-02  -.6858548E-02  -.7569809E-02  -.8023393E-02
  -.7814347E-02  -.6777082E-02  -.6012057E-02  -.6315066E-02  -.7469135E-02
  -.7945309E-02  -.6491886E-02  -.4091328E-02  -.3054892E-02  -.4420321E-02
  -.6803015E-02  -.8089630E-02  -.7792775E-02  -.7077699E-02  -.7322061E-02
  -.8682887E-02  -.9994219E-02  -.1023659E-01  -.9258943E-02  -.7664601E-02
  -.6223384E-02  -.5050605E-02  -.3841993E-02  -.2668171E-02  -.1868517E-02
  -.1277488E-02  -.2978746E-03   .1088069E-02   .2122057E-02   .2024382E-02
   .8974790E-03  -.3161652E-03  -.7885244E-03  -.6837939E-03  -.7909144E-03
  -.1542668E-02  -.2586484E-02  -.3285332E-02  -.3531839E-02  -.4054752E-02
  -.5341619E-02  -.7041856E-02  -.8454625E-02  -.8999752E-02  -.8854821E-02
  -.8612303E-02  -.8636957E-02  -.9031351E-02  -.9446717E-02  -.9162403E-02
  -.8079882E-02  -.7020125E-02  -.6671136E-02  -.6899405E-02  -.7064004E-02
  -.6915386E-02  -.6667995E-02  -.6398894E-02  -.5852088E-02  -.5220295E-02
  -.5208407E-02  -.6017022E-02  -.7219261E-02  -.8197746E-02  -.8586168E-02
  -.8413280E-02  -.8000175E-02  -.7940385E-02  -.8349034E-02  -.8641633E-02
  -.8256002E-02  -.7197968E-02  -.6037201E-02  -.5487295E-02  -.5556385E-02
  -.5428933E-02  -.4475412E-02  -.2921698E-02  -.1593087E-02  -.9643809E-03
  -.7640773E-03  -.4077035E-03   .4916502E-03   .1701503E-02   .2676478E-02
   .3132613E-02   .3258354E-02   .3156629E-02   .2627659E-02   .1780950E-02
   .8675292E-03   .4800516E-04  -.7468957E-03  -.1647108E-02  -.2643161E-02
  -.3721615E-02  -.4813037E-02  -.5528234E-02  -.5458060E-02  -.5000544E-02
  -.5087076E-02  -.5999058E-02  -.7053709E-02  -.7287381E-02  -.6307771E-02
  -.4808217E-02  -.3756517E-02  -.3505428E-02  -.3697929E-02  -.3854471E-02
  -.3957134E-02  -.3917904E-02  -.3036805E-02  -.2648717E-03   .4228001E-02
   .8713846E-02   .1105691E-01   .1000124E-01   .6167089E-02   .1437616E-02
  -.2443894E-02  -.5135280E-02  -.7398560E-02  -.9420910E-02  -.9966472E-02
  -.7637238E-02  -.3109328E-02   .1965017E-03  -.1139586E-02  -.6565117E-02
  -.1143738E-01  -.1172466E-01  -.8328079E-02  -.5710182E-02  -.6305267E-02
  -.8123286E-02  -.7960838E-02  -.4954903E-02  -.7616180E-03   .2542548E-02
   .4314039E-02   .5430573E-02   .6668333E-02   .7476392E-02   .6647799E-02
   .4149783E-02   .1329578E-02  -.7750255E-03  -.2300491E-02  -.3871103E-02
  -.5471281E-02  -.6597942E-02  -.7301860E-02  -.8228256E-02  -.9851179E-02
  -.1200261E-01  -.1374575E-01  -.1397423E-01  -.1227407E-01  -.9470117E-02
  -.7113977E-02  -.6185626E-02  -.6493838E-02  -.7106972E-02  -.6978940E-02
  -.5661291E-02  -.3760360E-02  -.2473199E-02  -.2474140E-02  -.3244551E-02
  -.3440581E-02  -.2291988E-02  -.3601957E-03   .9330762E-03   .9528431E-03
   .4405026E-03   .4908048E-03   .1305910E-02   .1855769E-02   .1017242E-02
  -.1190847E-02  -.3500055E-02  -.4669963E-02  -.4543525E-02  -.3643589E-02
  -.2360235E-02  -.7867586E-03   .1064039E-02   .2859064E-02   .3976394E-02
   .4241855E-02   .3962398E-02   .3567487E-02   .3437380E-02   .3823397E-02
   .4632595E-02   .5420917E-02   .5623573E-02   .4996038E-02   .3811876E-02
   .2896942E-02   .2967242E-02   .3814051E-02   .4589392E-02   .4607404E-02
   .4099752E-02   .3979972E-02   .4411382E-02   .4552672E-02   .3648701E-02
   .2035175E-02   .7266252E-03   .4669268E-03   .1299159E-02   .2405024E-02
   .3065510E-02   .3227836E-02   .3138427E-02   .3031775E-02   .3212322E-02
   .3803113E-02   .4549338E-02   .5204597E-02   .5679410E-02   .5969886E-02
   .6058088E-02   .5931340E-02   .5280021E-02   .3775487E-02   .1972346E-02
   .7016703E-03   .6482219E-04  -.5020480E-03  -.1405156E-02  -.2381605E-02
  -.2742476E-02  -.2395674E-02  -.1728020E-02  -.1007431E-02  -.5618855E-03
  -.5443000E-03  -.6453627E-03  -.5291595E-03   .1833819E-03   .1491862E-02
   .2729917E-02   .3379322E-02   .3581823E-02   .3812848E-02   .4255073E-02
   .4772125E-02   .5147835E-02   .5368239E-02   .5593891E-02   .5962327E-02
   .6373244E-02   .6718504E-02   .7053063E-02   .7540580E-02   .8201586E-02
   .8938259E-02   .9561971E-02   .9737651E-02   .9333615E-02   .8671412E-02
   .8246242E-02   .8328116E-02   .8959050E-02   .9763060E-02   .1012596E-01
   .9695475E-02   .8442768E-02   .6780592E-02   .5319659E-02   .4272236E-02
   .3596047E-02   .3101081E-02   .2616496E-02   .2276341E-02   .2075870E-02
   .1934079E-02   .1864756E-02   .1762894E-02   .1593970E-02   .1360508E-02
   .1008157E-02   .4548847E-03  -.4207142E-03  -.1492694E-02  -.2511158E-02
  -.3510086E-02  -.4419324E-02  -.4975743E-02  -.5049273E-02  -.4544373E-02
  -.3691061E-02  -.2907063E-02  -.2469048E-02  -.2218927E-02  -.1880259E-02
  -.1342755E-02  -.6479900E-03  -.5344743E-04   .3245055E-03   .6220447E-03
   .1049564E-02   .1563134E-02   .1996499E-02   .2114431E-02   .1907704E-02
   .1723447E-02   .1813421E-02   .2030373E-02   .1973100E-02   .1633365E-02
   .1298294E-02   .1160513E-02   .1239202E-02   .1332579E-02   .1236682E-02
   .1046946E-02   .1202845E-02   .1761774E-02   .2492360E-02   .3172617E-02
   .3628828E-02   .3918711E-02   .4124257E-02   .4217158E-02   .4345511E-02
   .4800570E-02   .5426039E-02   .5767104E-02   .5585873E-02   .5151370E-02
   .4934643E-02   .5173376E-02   .5819825E-02   .6680964E-02   .7391120E-02
   .7686299E-02   .7644165E-02   .7462029E-02   .7302923E-02   .7275235E-02
   .7363104E-02   .7414694E-02   .7089522E-02   .6285869E-02   .5333341E-02
   .4653406E-02   .4289219E-02   .3996643E-02   .3673248E-02   .3263358E-02
   .2579012E-02   .1913351E-02   .1774774E-02   .2075299E-02   .2386193E-02
   .2480197E-02   .2538955E-02   .2925840E-02   .3520049E-02   .3876429E-02
   .3954275E-02   .3895971E-02   .3695397E-02   .3472934E-02   .3367528E-02
   .3333138E-02   .3437533E-02   .3572820E-02   .3611420E-02   .3580778E-02
   .3589866E-02   .3529396E-02   .3206501E-02   .2555175E-02   .1720479E-02
   .9945586E-03   .5973471E-03   .7352382E-03   .1340808E-02   .2068403E-02
   .2714183E-02   .3417365E-02   .4196924E-02   .5016965E-02   .5924846E-02
   .6864709E-02   .7743558E-02   .8512176E-02   .9060852E-02   .9391353E-02
   .9591963E-02   .9561754E-02   .9239061E-02   .8819646E-02   .8371932E-02
   .7847733E-02   .7231576E-02   .6610524E-02   .6181325E-02   .5859496E-02
   .5468913E-02   .5235882E-02   .5140576E-02   .4797744E-02   .4177327E-02
   .3529049E-02   .2903777E-02   .2266693E-02   .1564223E-02   .8306769E-03
   .1859735E-03  -.2649646E-03  -.5946093E-03  -.8588552E-03  -.9683198E-03
  -.8475376E-03  -.3950724E-03   .3045516E-03   .1092653E-02   .1802865E-02
   .2475079E-02   .3191669E-02   .3930540E-02   .4585698E-02   .5111591E-02
   .5565471E-02   .5868845E-02   .5916798E-02   .5724297E-02   .5612084E-02
   .5791428E-02   .6098951E-02   .6274488E-02   .6177163E-02   .5906798E-02
   .5629916E-02   .5278437E-02   .4647891E-02   .3796558E-02   .2856353E-02
   .1915594E-02   .1039249E-02   .2236075E-03  -.5560733E-03  -.1199603E-02
  -.1627391E-02  -.1834163E-02  -.1746133E-02  -.1340592E-02  -.7388921E-03
  -.2020676E-03   .3404755E-04  -.6907559E-04  -.4641086E-03  -.9959114E-03
  -.1433935E-02  -.1617591E-02  -.1506239E-02  -.1151781E-02  -.7503891E-03
  -.4958631E-03  -.4223083E-03  -.4967800E-03  -.6945100E-03  -.1100938E-02
  -.1764258E-02  -.2658912E-02  -.3842930E-02  -.5208555E-02  -.6579462E-02
  -.7891307E-02  -.9151410E-02  -.1034457E-01  -.1142298E-01  -.1227660E-01
  -.1273239E-01  -.1275482E-01  -.1254218E-01  -.1210766E-01  -.1139622E-01
  -.1052481E-01  -.9630038E-02  -.8798140E-02  -.8069003E-02  -.7292244E-02
  -.6385066E-02  -.5460326E-02  -.4645651E-02  -.3877204E-02  -.3093174E-02
  -.2337816E-02  -.1733088E-02  -.1369115E-02  -.1406807E-02  -.1912645E-02
  -.2741921E-02  -.3738932E-02  -.4773622E-02  -.5714216E-02  -.6469991E-02
  -.7115244E-02  -.7614566E-02  -.7943125E-02  -.8084319E-02  -.8037011E-02
  -.7810179E-02  -.7401781E-02  -.6926104E-02  -.6458622E-02  -.5953045E-02
  -.5308991E-02  -.4564743E-02  -.3865327E-02  -.3364064E-02  -.3092370E-02
  -.2978084E-02  -.2984612E-02  -.3093632E-02  -.3261979E-02  -.3476519E-02
  -.3795575E-02  -.4056061E-02  -.4129575E-02  -.4131036E-02  -.4111674E-02
  -.3964647E-02  -.3660415E-02  -.3282466E-02  -.2907319E-02  -.2574323E-02
  -.2279241E-02  -.2011583E-02  -.1670594E-02  -.1247561E-02  -.8668585E-03
  -.5576220E-03  -.3072522E-03  -.2096353E-03  -.2540751E-03  -.3953800E-03
  -.6020207E-03  -.8277314E-03  -.1050987E-02  -.1326225E-02  -.1599465E-02
  -.1662146E-02  -.1533408E-02  -.1281995E-02  -.9225318E-03  -.4182275E-03
   .1977294E-03   .7523305E-03   .1184358E-02   .1605731E-02   .1989688E-02
   .2217620E-02   .2304554E-02   .2356509E-02   .2399361E-02   .2385304E-02
   .2348705E-02   .2299152E-02   .2175710E-02   .2050745E-02   .1955274E-02
   .1841953E-02   .1708916E-02   .1657008E-02   .1706031E-02   .1811632E-02
   .1954690E-02   .2173098E-02   .2395561E-02   .2591671E-02   .2777852E-02
   .2897180E-02   .2870781E-02   .2690782E-02   .2395396E-02   .1875972E-02
   .1295796E-02   .8840997E-03   .5717800E-03   .2393137E-03  -.3444481E-04
  -.2313057E-04   .1669617E-03   .4193156E-03   .7354770E-03   .1052630E-02
   .1316293E-02   .1519654E-02   .1775211E-02   .2060913E-02   .2321253E-02
   .2533416E-02   .2684078E-02   .2659726E-02   .2459204E-02   .2193906E-02
   .1761582E-02   .1243393E-02   .8808857E-03   .7079212E-03   .6885295E-03
   .9004787E-03   .1364683E-02   .1949816E-02   .2580741E-02   .3297174E-02
   .4007186E-02   .4564835E-02   .5001950E-02   .5360098E-02   .5732840E-02
   .6116507E-02   .6336342E-02   .6420053E-02   .6422163E-02   .6190962E-02
   .5682522E-02   .5003188E-02   .4315679E-02   .3669857E-02   .3052402E-02
   .2531857E-02   .2145210E-02   .1861871E-02   .1697952E-02   .1619763E-02
   .1587662E-02   .1612971E-02   .1713187E-02   .1932324E-02   .2192350E-02
   .2410905E-02   .2511110E-02   .2507845E-02   .2500112E-02   .2598641E-02
   .2795570E-02   .3025213E-02   .3271462E-02   .3491972E-02   .3664613E-02
   .3708840E-02   .3708644E-02   .3807167E-02   .3976746E-02   .4169585E-02
   .4369295E-02   .4669370E-02   .5123924E-02   .5665200E-02   .6225866E-02
   .6811240E-02   .7372628E-02   .7872643E-02   .8292210E-02   .8537259E-02
   .8520363E-02   .8260698E-02   .7893074E-02   .7434687E-02   .6887310E-02
   .6302314E-02   .5618818E-02   .4785645E-02   .3847763E-02   .2899037E-02
   .2014737E-02   .1212385E-02   .4799237E-03  -.1125325E-03  -.4663980E-03
  -.5382090E-03  -.3839143E-03  -.1027036E-03   .2671060E-03   .7020756E-03
   .1191189E-02   .1674663E-02   .2024028E-02   .2082945E-02   .1822099E-02
   .1395470E-02   .9209439E-03   .4746558E-03   .1332156E-03  -.4905454E-04
  -.1829510E-03  -.4066573E-03  -.5694195E-03  -.5947647E-03  -.6501792E-03
  -.8953178E-03  -.1258576E-02  -.1570066E-02  -.1726726E-02  -.1748203E-02
  -.1652183E-02  -.1458519E-02  -.1185004E-02  -.8880337E-03  -.6060807E-03
  -.3870530E-03  -.3775753E-03  -.4855535E-03  -.6103354E-03  -.7955995E-03
  -.1058598E-02  -.1289976E-02  -.1448415E-02  -.1528724E-02  -.1496919E-02
  -.1470803E-02  -.1535689E-02  -.1648043E-02  -.1712768E-02  -.1723216E-02
  -.1802894E-02  -.1897362E-02  -.1856236E-02  -.1673736E-02  -.1423431E-02
  -.1012257E-02  -.4481229E-03   .1584999E-03   .7471042E-03   .1266933E-02
   .1661636E-02   .1881360E-02   .1934710E-02   .1832074E-02   .1587082E-02
   .1228860E-02   .8257867E-03   .3987937E-03   .4130494E-04  -.2034680E-03
  -.3986916E-03  -.5791484E-03  -.7615729E-03  -.9815974E-03  -.1263411E-02
  -.1595815E-02  -.1904672E-02  -.2131733E-02  -.2362526E-02  -.2607280E-02
  -.2831273E-02  -.2999020E-02  -.3085953E-02  -.2982027E-02  -.2692365E-02
  -.2428074E-02  -.2239453E-02  -.2042502E-02  -.1839845E-02  -.1646278E-02
  -.1514967E-02  -.1476813E-02  -.1494418E-02  -.1542429E-02  -.1573943E-02
  -.1616978E-02  -.1737768E-02  -.1959030E-02  -.2303292E-02  -.2659426E-02
  -.2939864E-02  -.3176657E-02  -.3441895E-02  -.3695126E-02  -.3875909E-02
  -.3985774E-02  -.4021860E-02  -.3962661E-02  -.3800277E-02  -.3611512E-02
  -.3431121E-02  -.3115378E-02  -.2615405E-02  -.2074319E-02  -.1665240E-02
  -.1392309E-02  -.1147014E-02  -.1025247E-02  -.1035689E-02  -.1198404E-02
  -.1544919E-02  -.2011554E-02  -.2534731E-02  -.3071547E-02  -.3593962E-02
  -.4082080E-02  -.4555133E-02  -.4977728E-02  -.5177990E-02  -.5205341E-02
  -.5163962E-02  -.4930489E-02  -.4461625E-02  -.3855017E-02  -.3138586E-02
  -.2326746E-02  -.1507032E-02  -.7793658E-03  -.1276689E-03   .5120246E-03
   .1079366E-02   .1538768E-02   .1904647E-02   .2193467E-02   .2448556E-02
   .2675054E-02   .2821476E-02   .2886496E-02   .2971436E-02   .3022590E-02
   .2959678E-02   .2807374E-02   .2594895E-02   .2302819E-02   .1996801E-02
   .1763641E-02   .1558301E-02   .1350300E-02   .1158739E-02   .1067445E-02
   .1086557E-02   .1178515E-02   .1354190E-02   .1609260E-02   .1883635E-02
   .2192789E-02   .2586333E-02   .3045885E-02   .3463882E-02   .3685750E-02
   .3719468E-02   .3677331E-02   .3542681E-02   .3332078E-02   .3081077E-02
   .2788899E-02   .2431591E-02   .2053518E-02   .1745223E-02   .1532539E-02
   .1361799E-02   .1249652E-02   .1231969E-02   .1302914E-02   .1475474E-02
   .1694849E-02   .1993912E-02   .2381984E-02   .2808316E-02   .3172330E-02
   .3443933E-02   .3725903E-02   .4002879E-02   .4222056E-02   .4424879E-02
   .4661471E-02   .4847068E-02   .4962600E-02   .5040790E-02   .5036224E-02
   .4991101E-02   .4943044E-02   .4800195E-02   .4585741E-02   .4369619E-02
   .4163413E-02   .3974034E-02   .3887565E-02   .3948582E-02   .4074300E-02
   .4234483E-02   .4488057E-02   .4796046E-02   .5088119E-02   .5362383E-02
   .5631596E-02   .5883102E-02   .6076434E-02   .6170665E-02   .6166040E-02
   .6036296E-02   .5803964E-02   .5496472E-02   .5120183E-02   .4713178E-02
   .4264108E-02   .3813016E-02   .3443059E-02   .3104626E-02   .2776858E-02
   .2432318E-02   .2143190E-02   .1972467E-02   .1881732E-02   .1808352E-02
   .1778948E-02   .1782407E-02   .1729220E-02   .1688665E-02   .1681720E-02
   .1625637E-02   .1517558E-02   .1411272E-02   .1303950E-02   .1133636E-02
   .9353671E-03   .7554287E-03   .6373098E-03   .6105033E-03   .6413621E-03
   .7098720E-03   .8449034E-03   .1013123E-02   .1157592E-02   .1252320E-02
   .1313076E-02   .1315646E-02   .1228648E-02   .1071659E-02   .8420045E-03
   .5511070E-03   .2768458E-03   .3104488E-04  -.1817146E-03  -.3542011E-03
  -.5196037E-03  -.6483418E-03  -.7205630E-03  -.7578719E-03  -.7617622E-03
  -.7473881E-03  -.7755570E-03  -.8409642E-03  -.9062314E-03  -.9733925E-03
  -.1011829E-02  -.1009320E-02  -.1042317E-02  -.1110366E-02  -.1178404E-02
  -.1233965E-02  -.1215945E-02  -.1152461E-02  -.1074637E-02  -.9704965E-03
  -.7810016E-03  -.5162338E-03  -.2358094E-03   .3778377E-04   .2676141E-03
   .4154872E-03   .5253465E-03   .5904129E-03   .5772972E-03   .5193682E-03
   .4223515E-03   .2838928E-03   .1086010E-03  -.1347575E-03  -.4362493E-03
  -.7749210E-03  -.1128566E-02  -.1489099E-02  -.1852428E-02  -.2210684E-02
  -.2511544E-02  -.2758792E-02  -.2983873E-02  -.3157030E-02  -.3327800E-02
  -.3507517E-02  -.3613273E-02  -.3630454E-02  -.3630183E-02  -.3669238E-02
  -.3702990E-02  -.3679804E-02  -.3610557E-02  -.3534141E-02  -.3434419E-02
  -.3302210E-02  -.3173989E-02  -.3054394E-02  -.2934477E-02  -.2810145E-02
  -.2646581E-02  -.2470744E-02  -.2351294E-02  -.2205386E-02  -.2036064E-02
  -.1916234E-02  -.1807005E-02  -.1699880E-02  -.1605934E-02  -.1459903E-02
  -.1283136E-02  -.1133644E-02  -.9841938E-03  -.8267537E-03  -.6882591E-03
  -.5374472E-03  -.3959020E-03  -.2803658E-03  -.1938116E-03  -.1056273E-03
  -.2902931E-04  -.1782692E-04  -.6071238E-04  -.9480856E-04  -.1404730E-03
  -.2464361E-03  -.3890383E-03  -.5125054E-03  -.6332774E-03  -.7875094E-03
  -.9475961E-03  -.1090047E-02  -.1214554E-02  -.1321833E-02  -.1421082E-02
  -.1542441E-02  -.1714244E-02  -.1888419E-02  -.2005188E-02  -.2093930E-02
  -.2206973E-02  -.2342780E-02  -.2486483E-02  -.2647663E-02  -.2858956E-02
  -.3110250E-02  -.3316078E-02  -.3471321E-02  -.3634806E-02  -.3786117E-02
  -.3900816E-02  -.3985152E-02  -.4032644E-02  -.4069324E-02  -.4073745E-02
  -.4016997E-02  -.3944294E-02  -.3884613E-02  -.3812915E-02  -.3693554E-02
  -.3512824E-02  -.3305365E-02  -.3102223E-02  -.2898186E-02  -.2727007E-02
  -.2647793E-02  -.2642194E-02  -.2679858E-02  -.2793632E-02  -.2994688E-02
  -.3245513E-02  -.3500801E-02  -.3772884E-02  -.4052768E-02  -.4306481E-02
  -.4530974E-02  -.4715082E-02  -.4820877E-02  -.4853760E-02  -.4833000E-02
  -.4767133E-02  -.4636957E-02  -.4414224E-02  -.4149043E-02  -.3885748E-02
  -.3606860E-02  -.3307447E-02  -.3024563E-02  -.2789772E-02  -.2607493E-02
  -.2453927E-02  -.2339198E-02  -.2299069E-02  -.2334860E-02  -.2409117E-02
  -.2502276E-02  -.2615063E-02  -.2721884E-02  -.2814606E-02  -.2906035E-02
  -.2963794E-02  -.2962516E-02  -.2932953E-02  -.2911115E-02  -.2903568E-02
  -.2895442E-02  -.2839031E-02  -.2747501E-02  -.2670841E-02  -.2645846E-02
  -.2657294E-02  -.2707888E-02  -.2797220E-02  -.2900133E-02  -.3011794E-02
  -.3141520E-02  -.3285824E-02  -.3435785E-02  -.3593123E-02  -.3752768E-02
  -.3905718E-02  -.4045521E-02  -.4176639E-02  -.4283214E-02  -.4355479E-02
  -.4392251E-02  -.4378886E-02  -.4281271E-02  -.4111028E-02  -.3897494E-02
  -.3634896E-02  -.3317985E-02  -.2974161E-02  -.2627593E-02  -.2262486E-02
  -.1908040E-02  -.1588314E-02  -.1308053E-02  -.1096325E-02  -.9217662E-03
  -.7790318E-03  -.7060579E-03  -.7019399E-03  -.7305191E-03  -.7666198E-03
  -.8024704E-03  -.8433408E-03  -.9118551E-03  -.1013323E-02  -.1091400E-02
  -.1119275E-02  -.1148013E-02  -.1180617E-02  -.1190529E-02  -.1169347E-02
  -.1143737E-02  -.1108774E-02  -.1062376E-02  -.1028251E-02  -.1001204E-02
  -.9534337E-03  -.8838804E-03  -.8084852E-03  -.7111107E-03  -.6002077E-03
  -.4979373E-03  -.3911405E-03  -.2894800E-03  -.2039116E-03  -.1406950E-03
  -.1104505E-03  -.1083372E-03  -.1229146E-03  -.1748821E-03  -.2426835E-03
  -.3007854E-03  -.3431851E-03  -.3942261E-03  -.4696387E-03  -.5210767E-03
  -.5299690E-03  -.5256312E-03  -.5024334E-03  -.4346452E-03  -.3585001E-03
  -.3010863E-03  -.2303597E-03  -.1383798E-03  -.6956197E-04  -.4617422E-04
  -.3407336E-04  -.2193366E-04  -.4844959E-05   .3081202E-04   .7316856E-04
   .1073217E-03   .1281126E-03   .1423668E-03   .1637102E-03   .1878684E-03
   .2078649E-03   .2387185E-03   .2798853E-03   .3477025E-03   .4452832E-03
   .5447246E-03   .6374958E-03   .7331159E-03   .8309169E-03   .9211781E-03
   .9953673E-03   .1075864E-02   .1160966E-02   .1224786E-02   .1263717E-02
   .1271332E-02   .1248088E-02   .1198907E-02   .1122466E-02   .1015814E-02
   .8857195E-03   .7528235E-03   .6284135E-03   .5205622E-03   .4433344E-03
   .4051019E-03   .3954766E-03   .3999804E-03   .4237205E-03   .4757315E-03
   .5569094E-03   .6600285E-03   .7594912E-03   .8633482E-03   .9774408E-03
   .1088625E-02   .1194738E-02   .1296102E-02   .1387823E-02   .1455026E-02
   .1498717E-02   .1527487E-02   .1531276E-02   .1510994E-02   .1506239E-02
   .1502326E-02   .1464942E-02   .1404276E-02   .1332500E-02   .1257188E-02
   .1178169E-02   .1108142E-02   .1047456E-02   .9872405E-03   .9621979E-03
   .9719626E-03   .9877172E-03   .1009313E-02   .1037310E-02   .1052834E-02
   .1069139E-02   .1084635E-02   .1093026E-02   .1102048E-02   .1102480E-02
   .1082045E-02   .1041805E-02   .1002839E-02   .9650858E-03   .9202062E-03
   .8867116E-03   .8670022E-03   .8558175E-03   .8458148E-03   .8376133E-03
   .8340076E-03   .8467811E-03   .8732698E-03   .8871650E-03   .8928395E-03
   .9308852E-03   .9996953E-03   .1063156E-02   .1105594E-02   .1137662E-02
   .1171462E-02   .1187799E-02   .1178580E-02   .1156560E-02   .1140195E-02
   .1144892E-02   .1128911E-02   .1076191E-02   .1041567E-02   .1045780E-02
   .1040697E-02   .9973245E-03   .9399878E-03   .9003303E-03   .8763492E-03
   .8386849E-03   .7686420E-03   .6779731E-03   .5914152E-03   .5299434E-03
   .4876922E-03   .4900678E-03   .5787268E-03   .6816789E-03   .6083127E-03
   .3267539E-03   .1775061E-03   .5048060E-03   .1042189E-02   .1098389E-02
   .5613743E-03   .2322803E-03   .7187622E-03   .1434466E-02   .1430038E-02
   .8035003E-03   .5068487E-03   .8978131E-03   .1279324E-02   .1033284E-02
   .5481720E-03   .5880920E-03   .1106630E-02   .1340678E-02   .9498650E-03
   .4407040E-03   .3521781E-03   .5478318E-03   .6030453E-03   .4766316E-03
   .4046038E-03   .4237854E-03   .4195923E-03   .3965702E-03   .4358808E-03
   .4708882E-03   .3362541E-03   .7174060E-04  -.4493629E-04   .1349146E-03
   .4021714E-03   .4708498E-03   .3410617E-03   .2632727E-03   .3698075E-03
   .5104944E-03   .4624296E-03   .2321081E-03   .8162655E-04   .1917173E-03
   .4306953E-03   .5655238E-03   .5551106E-03   .5258460E-03   .5296285E-03
   .4902876E-03   .4155588E-03   .4202252E-03   .5039020E-03   .5231404E-03
   .4210875E-03   .3061945E-03   .2625544E-03   .2511784E-03   .2330693E-03
   .2667799E-03   .3505122E-03   .3198729E-03   .1015492E-03  -.7455658E-04
   .4692399E-04   .3421772E-03   .4472216E-03   .2869624E-03   .1675139E-03
   .2753216E-03   .4041123E-03   .3202218E-03   .1369889E-03   .1150554E-03
   .2609498E-03   .3555640E-03   .3099456E-03   .2494455E-03   .2512995E-03
   .2353248E-03   .1583804E-03   .1272646E-03   .2022421E-03   .2576589E-03
   .1871708E-03   .7396721E-04   .5514210E-04   .1174253E-03   .1516449E-03
   .1503406E-03   .1869347E-03   .2516953E-03   .2522312E-03   .1600792E-03
   .8249331E-04   .1226466E-03   .2322729E-03   .2848571E-03   .2465808E-03
   .1811724E-03   .1332619E-03   .9687973E-04   .7791102E-04   .1004079E-03
   .1407178E-03   .1350243E-03   .7232795E-04   .3687298E-04   .9150128E-04
   .1869868E-03   .2267374E-03   .1824472E-03   .1211861E-03   .1053468E-03
   .1225485E-03   .1305785E-03   .1190985E-03   .1082519E-03   .1038089E-03
   .8626651E-04   .5302021E-04   .2922409E-04   .3198363E-04   .4984291E-04
   .5953274E-04   .5407424E-04   .5021788E-04   .6536204E-04   .9436701E-04
   .1088688E-03   .8870785E-04   .4862157E-04   .2125215E-04   .2040895E-04
   .2855906E-04   .2319635E-04   .5174577E-05  -.9580602E-05  -.6312665E-05
   .1145652E-04   .2745171E-04   .2962146E-04   .1373650E-04  -.1090837E-04
  -.1778148E-04   .8824764E-05   .4414417E-04   .5129536E-04   .3156250E-04
   .2272333E-04   .5194708E-04   .1049295E-03   .1477488E-03   .1570384E-03
   .1299355E-03   .8755057E-04   .6279727E-04   .6702558E-04   .7855384E-04
   .7471527E-04   .6649248E-04   .9125609E-04   .1626533E-03   .2384180E-03
   .2544903E-03   .1963289E-03   .1263231E-03   .1300724E-03   .2328782E-03
   .3701824E-03   .4562576E-03   .4651193E-03   .4299423E-03   .3776296E-03
   .3008300E-03   .1962808E-03   .9282457E-04   .1929204E-04  -.3649781E-04
  -.1099821E-03  -.2118772E-03  -.3138790E-03  -.3775996E-03  -.3874226E-03
  -.3564847E-03  -.3024116E-03  -.2233948E-03  -.1056873E-03   .2874023E-04
   .1068139E-03   .7286760E-04  -.3524161E-04  -.1102131E-03  -.9450094E-04
  -.3507489E-04   .4031621E-06   .1228410E-04   .5031400E-04   .1462106E-03
   .2855464E-03   .4186676E-03   .4857104E-03   .4542251E-03   .3520458E-03
   .2450322E-03   .1736106E-03   .1302582E-03   .8887735E-04   .3559265E-04
  -.3443958E-04  -.1198911E-03  -.1965936E-03  -.2236002E-03  -.1783556E-03
  -.8086290E-04   .2118930E-04   .8975097E-04   .1224547E-03   .1370702E-03
   .1436038E-03   .1427676E-03   .1387703E-03   .1417536E-03   .1582039E-03
   .1834456E-03   .2040619E-03   .2104131E-03   .2052542E-03   .1950333E-03
   .1745120E-03   .1308948E-03   .6815054E-04   .1444418E-04  -.6607562E-05
  -.2201192E-05  -.1400062E-05  -.1788004E-04  -.3187029E-04  -.1812255E-04
   .2019963E-04   .5514608E-04   .6440691E-04   .5013844E-04   .3291693E-04
   .3317785E-04   .5548205E-04   .8778633E-04   .1124780E-03   .1190707E-03
   .1108749E-03   .9934877E-04   .9534917E-04   .1035550E-03   .1192877E-03
   .1288667E-03   .1214286E-03   .1014640E-03   .8469036E-04   .8253557E-04
   .9010087E-04   .9503767E-04   .9344512E-04   .9130524E-04   .9371978E-04
   .9686753E-04   .9184107E-04   .7437314E-04   .4898956E-04   .2569541E-04
   .1353052E-04   .1576926E-04   .2890216E-04   .4495168E-04   .5652004E-04
   .6435756E-04   .7354964E-04   .8493127E-04   .9418441E-04   .9634422E-04
   .9187874E-04   .8603930E-04   .8291780E-04   .8227231E-04   .8109338E-04
   .7688654E-04   .6963010E-04   .6239431E-04   .5818782E-04   .5582385E-04
   .5161247E-04   .4446962E-04   .3751315E-04   .3441001E-04   .3490179E-04
   .3731699E-04   .4097459E-04   .4474733E-04   .4602999E-04   .4318047E-04
   .3906040E-04   .3833715E-04   .4117584E-04   .4266530E-04   .3871666E-04
   .3027061E-04   .2046210E-04   .1170893E-04   .5277233E-05   .1300721E-05
  -.9147447E-06  -.1906738E-05  -.1023644E-05   .2927259E-05   .9392246E-05
   .1549824E-04   .1920134E-04   .2142658E-04   .2447474E-04   .2880034E-04
   .3280031E-04   .3492542E-04   .3508026E-04   .3403217E-04   .3174613E-04
   .2791265E-04   .2347326E-04   .1966550E-04   .1691587E-04   .1551965E-04
   .1505160E-04   .1469281E-04   .1447755E-04   .1532118E-04   .1745440E-04
   .1981603E-04   .2104255E-04   .2064383E-04   .1943920E-04   .1835530E-04
   .1773644E-04   .1727509E-04   .1634356E-04   .1477525E-04   .1289776E-04
   .1109234E-04   .9718016E-05   .8913737E-05   .8526471E-05   .8429517E-05
   .8381721E-05   .7927364E-05   .6923136E-05   .5637004E-05   .4398996E-05
   .3358387E-05   .2558402E-05   .1864685E-05   .1128685E-05   .5866950E-06
   .5742655E-06   .1162742E-05   .2158745E-05   .3138623E-05   .3866169E-05
   .4486539E-05   .5132659E-05   .5774021E-05   .6264510E-05   .6578852E-05
   .6792008E-05   .6836463E-05   .6548969E-05   .5800038E-05   .4616371E-05
   .3166867E-05   .1713070E-05   .5669898E-06  -.5825358E-07  -.1255838E-06
   .2095150E-06   .6580237E-06   .9502047E-06   .9723742E-06   .7780541E-06
   .4269851E-06  -.3683177E-07  -.4945501E-06  -.8019168E-06  -.9227094E-06
  -.9656061E-06  -.1052662E-05  -.1198170E-05  -.1325514E-05  -.1395972E-05
  -.1378235E-05  -.1277935E-05  -.1153573E-05  -.1113312E-05  -.1244413E-05
  -.1543483E-05  -.1923530E-05  -.2251127E-05  -.2424443E-05  -.2428060E-05
  -.2347318E-05  -.2287234E-05  -.2280027E-05  -.2312790E-05  -.2391838E-05
  -.2508617E-05  -.2634412E-05  -.2764210E-05  -.2916592E-05  -.3107017E-05
  -.3316202E-05  -.3504961E-05  -.3657480E-05  -.3781891E-05  -.3896292E-05
  -.4008458E-05  -.4114040E-05  -.4218673E-05  -.4331837E-05  -.4454505E-05
  -.4586059E-05  -.4727132E-05  -.4871748E-05  -.5010881E-05  -.5144016E-05
  -.5278949E-05  -.5424944E-05  -.5581915E-05  -.5741984E-05  -.5896086E-05
  -.6043336E-05  -.6188947E-05  -.6337196E-05  -.6488623E-05  -.6637211E-05
  -.6779642E-05  -.6919405E-05  -.7062738E-05  -.7213567E-05  -.7372512E-05
  -.7536365E-05  -.7701365E-05  -.7865846E-05  -.8030166E-05  -.8196283E-05
  -.8365014E-05  -.8534918E-05  -.8704154E-05  -.8871615E-05  -.9037302E-05
  -.9201265E-05  -.9363189E-05  -.9523426E-05  -.9682838E-05  -.9841368E-05
  -.9998728E-05  -.1015492E-04  -.1030987E-04  -.1046311E-04  -.1061467E-04
  -.1076514E-04  -.1091472E-04  -.1106325E-04  -.1121079E-04  -.1135745E-04
  -.1150323E-04  -.1164811E-04  -.1179209E-04  -.1193515E-04  -.1207737E-04
  -.1221876E-04  -.1235929E-04  -.1249885E-04  -.1263743E-04  -.1277503E-04
  -.1291166E-04  -.1304731E-04  -.1318200E-04  -.1331571E-04  -.1344845E-04
  -.1358024E-04  -.1371108E-04  -.1384099E-04  -.1396997E-04  -.1409803E-04
