# Supplementary material for: Earthquake Response Analysis of Tall Reinforced Concrete Chimneys considering Eccentricity
Source: Hindawi journal article supplement (doi:10.1155/2020/1417969), 2020-03-11
Supplement: f1 [file 1417969.f1.zip › 1417969.f1/Four kinds of earthquake records/Stiff soil/CHICHI CHY028-V.txt]

PEER STRONG MOTION DATABASE RECORD. PROCESSING BY PACIFIC ENGINEERING.
CHI-CHI 09/20/99, CHY028, V (CWB)
ACCELERATION TIME HISTORY IN UNITS OF G. FILTER POINTS: HP=0.04 Hz LP=50.0 Hz
NPTS= 18000, DT= .00500 SEC
  -.5576848E-07  -.6073699E-07  -.6477449E-07  -.8528506E-07  -.7657566E-07
  -.8404831E-07  -.7359327E-07  -.8159036E-07  -.8446548E-07  -.9467505E-07
  -.7543183E-07  -.8785388E-07  -.8281391E-07  -.7672652E-07  -.4456235E-07
  -.5104837E-07  -.6428683E-07  -.7426590E-07  -.4606108E-07  -.1349703E-06
  -.1535650E-06  -.1009138E-06  -.3697069E-07  -.6383169E-07  -.2172365E-06
  -.3602806E-06  -.2608320E-06  -.6755279E-07  -.1433098E-06  -.2121985E-06
  -.4814044E-07  -.3309433E-07  -.2212302E-07  -.4167194E-08  -.2311516E-07
  -.3925900E-06  -.6381993E-06  -.5811289E-06  -.3153845E-06  -.6390118E-07
   .1027733E-06  -.6942991E-09   .2025922E-06   .3435962E-06   .1578221E-06
  -.1683492E-06  -.2210611E-06  -.9903399E-07  -.1980507E-06  -.2397550E-06
  -.4204595E-06  -.5202775E-06   .8724374E-07   .5171440E-06   .3029908E-06
  -.1921020E-06  -.3247942E-06   .1432164E-06   .4520869E-06  -.5260724E-06
  -.1458248E-05  -.1507239E-05  -.4459774E-06   .9467180E-06   .6967937E-06
  -.1800279E-06   .2431602E-06   .9382937E-06   .9636322E-06   .2476374E-06
   .1069115E-07   .2803842E-06  -.2604647E-06  -.1490551E-05  -.1821445E-05
  -.2087788E-05  -.1184622E-05   .8072592E-06   .1486790E-05   .2978552E-06
  -.1601563E-05  -.1670234E-05  -.8841838E-06  -.1317933E-05  -.7032477E-06
   .7323989E-06   .1221938E-05   .6591986E-06  -.2417275E-06  -.5728592E-06
   .5156355E-06   .1832013E-05   .2169629E-05   .2300722E-05   .9642270E-06
  -.6233190E-06   .2016679E-06   .2029631E-05   .2116718E-05   .4769595E-06
  -.1178341E-05  -.1295738E-05  -.1790917E-05  -.8362018E-06   .8537050E-06
   .6530849E-06   .3934274E-06   .1009912E-05   .1452587E-05   .1355008E-05
   .1187674E-05   .1577285E-05   .2224792E-05   .1406048E-05   .1937605E-05
   .3319808E-05   .3030084E-05   .2559333E-05   .1722019E-05   .9960030E-07
   .1958786E-06   .1760503E-05   .3724897E-05   .3755342E-05   .1567609E-05
   .6892713E-06  -.1932284E-06   .1146306E-05   .1909234E-05  -.2182168E-05
  -.6031673E-05  -.1990010E-05   .3332876E-05   .1563246E-05   .6050888E-06
   .2345235E-05   .2621720E-05   .2877220E-05   .4309767E-05   .1175165E-05
  -.4471438E-06   .3042751E-05   .3321170E-05  -.1453331E-05  -.1839718E-05
   .2359786E-05   .5359630E-05   .3492993E-05  -.1353179E-05  -.4895469E-05
  -.3236906E-05   .1193331E-05   .3421107E-05   .2066492E-05  -.1227052E-06
  -.8119201E-06  -.2517586E-05  -.5468053E-05  -.8813372E-05  -.4913583E-05
   .8256837E-06   .2720101E-05   .2727776E-05   .1959076E-05  -.3784367E-06
  -.1807444E-05   .2037363E-06  -.1904090E-05  -.9869703E-05  -.8669938E-05
   .1924893E-05   .7130626E-05  -.9016289E-07  -.5776248E-05  -.3097894E-05
   .4061519E-05   .9583319E-05   .6092824E-05   .4318292E-05   .7282095E-05
   .6573578E-05   .3391234E-05   .1523103E-05   .1826350E-05   .6913219E-05
   .4535304E-05  -.6597458E-06  -.7721027E-06  -.6629672E-05  -.5824560E-05
   .2814371E-05   .5534747E-05  -.8182877E-06  -.8675875E-05  -.1010547E-04
  -.4320115E-05   .3848147E-05   .9248287E-05   .4604228E-05  -.9382861E-05
  -.1436057E-04  -.7528986E-05  -.4463558E-05  -.2539873E-05   .2212470E-05
  -.5058852E-05  -.1192587E-04  -.2154332E-05   .1013317E-04   .3395724E-05
  -.1147950E-04  -.7257837E-05   .4779949E-05   .3478869E-05  -.3813410E-05
  -.4208316E-05   .1455732E-05   .2126958E-05   .6059676E-05   .1565437E-04
   .9010754E-05   .2805093E-05   .5392980E-05   .7109382E-05   .4433898E-05
   .5712057E-07   .1611690E-06  -.3978847E-06  -.2115504E-05   .2853540E-05
   .1108011E-04   .9754818E-05  -.3397349E-05  -.1384309E-04  -.4774783E-06
   .1809214E-04   .1758104E-04   .4724335E-05   .1520438E-05  -.4191277E-05
  -.1222502E-04  -.1182422E-04  -.4643993E-05   .9698110E-05   .1056921E-04
   .1994262E-05  -.9070733E-06   .1075352E-04   .2173215E-04   .1121355E-04
  -.2756929E-05  -.8791163E-05  -.2397739E-05  -.5859208E-05  -.2372574E-04
  -.1638986E-04  -.6244125E-05   .4214913E-05   .2131929E-04   .6211567E-05
  -.1907906E-04  -.1162971E-04  -.6099055E-05  -.9210992E-05  -.1253934E-04
  -.2306537E-04  -.1754966E-04   .6462007E-05   .2789000E-04   .2810345E-04
   .2007110E-04   .8908049E-05  -.1492297E-04  -.1460674E-04   .9803759E-05
   .2817943E-04   .1652516E-04  -.8125677E-05  -.7532058E-05   .1033073E-04
   .1448747E-04  -.5813136E-05   .5799532E-07   .2066853E-04   .2083944E-05
  -.1927785E-04  -.1076455E-04   .5156130E-05   .5353526E-05  -.9195576E-06
  -.1392075E-04  -.2526919E-04  -.7019971E-05   .1533300E-04   .7294715E-05
   .3338193E-05   .1331611E-04   .2035628E-04   .1741827E-04   .1371522E-04
   .1341770E-05  -.1358769E-04  -.4976621E-05   .3875597E-06  -.3179153E-04
  -.4084805E-04  -.8290082E-05   .1123383E-04   .6083676E-05   .6022698E-06
   .6618157E-05   .2902711E-05   .6979845E-05   .1227718E-04   .4441395E-05
  -.2922424E-06  -.2181448E-06   .7484860E-05   .1970309E-04   .1659490E-04
  -.1329626E-05  -.8779696E-05   .8683880E-07   .6533138E-05   .1469272E-04
   .1903511E-04   .2374975E-04   .1837412E-04  -.1093450E-04  -.1192563E-04
   .1761162E-04   .2319254E-04  -.1257885E-06  -.9350187E-05   .9008104E-05
   .1240467E-04   .1109053E-04   .2437347E-04   .1299650E-04  -.1653542E-04
  -.2361798E-05   .3434008E-04   .1454994E-04  -.1118513E-05   .1993933E-04
   .1502386E-04  -.2871226E-04  -.2763281E-04   .1201508E-04   .3882636E-04
   .4236267E-04   .2459996E-04  -.3146371E-06  -.3054688E-04  -.4104212E-04
  -.3518778E-04  -.3154592E-04  -.9744026E-05   .1454262E-04   .1826465E-04
   .1134142E-04   .1256192E-04   .2305419E-04   .2217781E-04   .6471397E-05
  -.1694480E-04  -.1542034E-04   .1253574E-04   .9591998E-05  -.1449818E-04
   .4776518E-06   .2264085E-04   .2336646E-04   .1535417E-04  -.1606857E-05
   .2792294E-05   .5238170E-05  -.6669934E-05  -.1750741E-04  -.2068798E-04
  -.6615599E-05   .3412609E-05   .7962458E-05   .9155588E-05   .1839862E-05
   .3875108E-06  -.3186742E-05  -.6531077E-05   .2922941E-05   .2203326E-04
   .3872342E-04   .2087106E-04   .5072496E-05   .2023470E-04   .2633876E-04
   .1982874E-04   .1217680E-04  -.1662349E-04  -.2385779E-04  -.1969351E-04
  -.1178139E-04  -.1262996E-04  -.5332010E-04  -.5458808E-04  -.1508015E-04
   .1541646E-05  -.8644631E-05  -.1190883E-04   .4666248E-05   .2242485E-04
   .3218623E-04   .2148197E-04  -.4551199E-06   .3891983E-05   .2943505E-04
   .2019815E-04  -.2768858E-04  -.2394906E-04  -.9115886E-06  -.2631768E-04
  -.1596629E-04   .2286117E-04   .1790233E-04  -.4329974E-04  -.8775848E-04
  -.4621366E-04   .3907481E-05  -.4163675E-05  -.8374790E-05  -.4359540E-04
  -.4846990E-04  -.3934955E-05   .1966619E-04   .3025530E-04   .4068457E-04
   .2264664E-04  -.1865137E-04  -.3559780E-04  -.2200675E-04   .1278458E-04
   .1480192E-04  -.5690522E-05  -.7961753E-05  -.1256333E-04   .2277443E-05
   .2929159E-04   .2047589E-04   .5625151E-05   .8303148E-05   .5888280E-06
  -.8361459E-05   .3047417E-05   .3001569E-04   .4242504E-04  -.7876842E-06
  -.6793406E-05   .1529261E-04  -.1145351E-04  -.4189444E-04  -.1290478E-04
   .1735200E-04  -.4605831E-05  -.1009193E-04   .1007463E-04   .1047923E-04
   .7114646E-05   .1642728E-04   .1283794E-04  -.1342662E-04  -.2287026E-04
  -.3809410E-04  -.3126472E-04   .1267884E-05   .1214387E-04  -.3085509E-05
  -.4031932E-04  -.4253137E-04  -.2394646E-04  -.4461246E-04  -.5704323E-04
  -.4447054E-04  -.5396749E-04  -.2767321E-04   .2246845E-04   .3080422E-04
   .4767557E-05  -.2570176E-05  -.2004232E-05  -.5412272E-05   .8214045E-05
   .1016091E-04  -.3404608E-04  -.3697440E-04   .1909442E-04   .2301308E-04
  -.2889170E-04  -.2577416E-04   .3685172E-04   .1790657E-04  -.3936981E-04
  -.4063368E-04  -.5238609E-04  -.3861013E-04   .3063086E-04   .6618700E-04
   .2595138E-04   .4107310E-05   .3492285E-04   .3248785E-04  -.5160762E-04
  -.1084442E-03  -.5252833E-04  -.3629861E-05  -.1646912E-04  -.3494276E-04
  -.1156714E-04   .1115202E-04   .2287546E-04   .5346645E-04   .7740751E-04
   .2299663E-04  -.6234417E-04  -.5480546E-04   .3245404E-05  -.1633785E-05
  -.3352470E-04  -.5417072E-04  -.6707185E-04  -.3641970E-04   .6376798E-05
  -.7832615E-05  -.2447406E-04   .4681408E-05   .4494749E-04   .8099627E-04
   .7840323E-04   .4588490E-04   .3768682E-04   .2807301E-04  -.2946321E-04
  -.8007157E-04  -.4922441E-04   .2554321E-04   .5881186E-04   .2049784E-04
  -.2958635E-04  -.3997315E-04  -.1303127E-04  -.1331905E-04  -.2746316E-04
  -.8641356E-05   .3199970E-04   .3550741E-04   .3946798E-04   .6565712E-04
   .5823601E-04   .5022500E-05  -.1026644E-04  -.3826359E-04  -.6893851E-04
  -.7893908E-04  -.8150729E-04  -.1463731E-04   .1316186E-04  -.2740213E-04
   .5951148E-05   .4036590E-04   .3408157E-04   .5409604E-04   .8422247E-04
   .3936495E-04  -.1695957E-04  -.9574884E-05   .1657583E-04   .4267173E-04
   .4562425E-04   .1802275E-04  -.2395743E-04  -.9305867E-05   .4785039E-05
  -.4120344E-04  -.7005760E-06   .5602569E-04   .9350131E-05  -.6898761E-04
  -.3167150E-04   .5846522E-04   .7539292E-04   .3944649E-04  -.1890041E-04
  -.4108429E-04  -.1551326E-04   .1441868E-04   .1188058E-04   .5450727E-05
   .1667686E-05   .2062987E-04   .5295537E-04   .7118507E-04   .1006632E-03
   .8643814E-04   .4062183E-04  -.3478550E-04  -.8582363E-04  -.3877578E-04
   .1497526E-04   .2253013E-04  -.3002185E-04  -.1220620E-03  -.1010570E-03
  -.2263289E-04  -.1610747E-04  -.3557910E-04  -.2549272E-04  -.1314671E-04
  -.4901177E-05  -.1286921E-04  -.6008087E-04  -.1522577E-04   .8219679E-04
   .8582672E-04  -.2566349E-05  -.1948166E-04   .6256677E-04   .1123129E-03
   .5000803E-04  -.1806699E-05   .1736472E-05  -.1199336E-04  -.5518123E-05
   .2704000E-04   .3314997E-04   .6438227E-05  -.5196141E-06  -.3807172E-05
  -.1522681E-04  -.2962420E-04  -.3276400E-04   .2636740E-04   .8350693E-04
   .5560181E-04  -.8204399E-05  -.4910502E-04  -.6110735E-04   .1921288E-05
   .7183865E-04   .9888501E-04   .6676257E-04   .1685438E-04  -.2766592E-06
   .3606217E-04   .5528706E-04   .3625118E-04   .1602423E-04  -.7280106E-05
  -.1581052E-04  -.4802486E-05  -.1837933E-04  -.1981219E-04  -.4718123E-04
  -.7008375E-04   .1286598E-04   .5575057E-04   .2992578E-04  -.5157282E-05
  -.5928031E-04  -.7226309E-04  -.3801709E-04   .2482654E-04   .3286441E-04
   .2414650E-04   .3583575E-04  -.1156231E-04  -.7934482E-04  -.7597288E-04
  -.1648991E-04  -.1392101E-04  -.2964258E-04  -.3314693E-05   .1965669E-04
   .5421933E-04   .8593887E-04   .1005898E-03   .9685065E-04   .4839006E-04
   .2361208E-04   .8365483E-05  -.3386665E-04  -.8503249E-04  -.7649754E-04
  -.4772936E-04  -.2306972E-04   .1470806E-04   .3150618E-04   .9061392E-05
   .7152031E-05   .2262883E-04  -.2826924E-05  -.6157747E-04  -.6684447E-04
   .1345843E-04   .2713895E-04  -.3408263E-04  -.4003020E-04  -.2447727E-04
   .1171354E-04   .6238735E-04   .6392632E-04   .2599933E-04  -.1956216E-04
  -.6519107E-04  -.6128817E-04   .1452809E-04   .3357010E-04  -.7406379E-05
  -.3546746E-06   .1874753E-04  -.5992396E-05   .7732815E-05   .2328540E-04
   .2285858E-04   .2896324E-04   .2069993E-04  -.4639364E-04  -.1101320E-03
  -.8413032E-04  -.2886428E-04   .4660703E-04   .7569870E-04   .1281681E-04
   .1469863E-04   .7743411E-04   .6584945E-04   .1012082E-04   .1744866E-04
   .3385013E-04   .5870720E-04   .7337829E-04   .2914426E-04   .1126481E-04
   .5344994E-04   .7188159E-04   .6730142E-04   .2338707E-04  -.6725383E-04
  -.9078374E-04  -.5274880E-04  -.5887289E-06  -.4435021E-05  -.4450720E-04
  -.3459832E-04  -.2363682E-04   .7337060E-05   .7024273E-04   .9709155E-04
   .5069114E-04  -.7563127E-05  -.1797822E-05   .4375463E-04   .5062355E-04
  -.4254624E-04  -.7568880E-04  -.1639131E-04  -.1321764E-04  -.3601821E-04
   .1962815E-05   .1758244E-04  -.3841023E-04  -.4480906E-04  -.7022653E-04
  -.2805571E-04   .9042326E-04   .1045016E-03   .3719969E-04   .1077185E-04
   .2964610E-04   .3310532E-04   .2833681E-05   .2063854E-04   .8563398E-04
   .5217534E-04  -.2173343E-04  -.1963672E-04   .1409863E-04   .5241704E-04
   .5672446E-04   .2657191E-04  -.1414510E-04  -.3367895E-04  -.3033474E-04
  -.2418435E-04  -.2523121E-04  -.2715095E-04  -.1961417E-04   .6278873E-05
  -.9892205E-05  -.4052579E-04  -.5358990E-05  -.6705274E-05  -.4204041E-04
  -.3088485E-04  -.8965070E-05  -.4965787E-04  -.3103765E-04   .6242738E-04
   .4656492E-04  -.8814712E-04  -.9274407E-04  -.9020963E-06   .3515155E-04
   .7024967E-05  -.5340380E-05  -.7333821E-05  -.3022440E-04  -.6150153E-04
  -.4552451E-04   .1577973E-04   .4780680E-04   .3464774E-04  -.4281835E-04
  -.1604659E-03  -.1334460E-03  -.2998410E-04  -.3297556E-04  -.6984937E-04
  -.5518809E-04  -.7910521E-04  -.5694579E-04   .1175071E-05   .4179063E-04
   .8022700E-04   .8556772E-04   .2918632E-04   .1043669E-04   .6758624E-04
   .1033692E-03   .6519098E-04   .2510370E-04   .8422369E-05  -.3370695E-04
  -.6126672E-04  -.6462647E-04  -.4272992E-04  -.3025655E-04  -.4347872E-04
  -.1114898E-04   .2458795E-04  -.3914066E-04  -.1120218E-03  -.5633103E-04
   .1912267E-04   .2909265E-04  -.6525162E-05  -.3208061E-04  -.2874107E-04
  -.2132234E-04  -.1357066E-04   .1598501E-04   .3416168E-04   .2945771E-05
  -.2304635E-04   .1566644E-04   .8499357E-04   .1046636E-03   .5324527E-04
  -.1622792E-04  -.1473445E-04   .7845304E-04   .7422647E-04  -.5260905E-04
  -.8554710E-04  -.9185565E-04  -.1012111E-03  -.6872190E-05   .6815287E-04
   .9792308E-05  -.4698714E-04   .2223222E-04   .2725051E-04  -.3659904E-04
  -.3204012E-04   .4876417E-04   .7737612E-04   .4424490E-04   .1435399E-04
   .1659846E-04   .6333121E-04   .7525704E-05  -.5754658E-04   .1485447E-04
   .2744116E-04  -.4244991E-04  -.8199942E-04  -.4365596E-04   .1614017E-04
   .1816351E-04   .2198848E-04   .5533126E-04   .2721423E-04  -.1157331E-04
   .1619370E-04  -.2159206E-04  -.1098066E-03  -.9276879E-04  -.2901437E-04
  -.2062521E-04   .4140277E-04   .9149358E-04  -.1774563E-04  -.5102490E-04
   .1667332E-04   .7367349E-04   .6555990E-04   .2473412E-04  -.1387452E-04
  -.3774591E-04  -.7722430E-04  -.1056696E-03  -.4456409E-04   .1710043E-04
   .2475870E-04  -.1479160E-04  -.5567214E-04  -.6258967E-05   .6064578E-04
   .5995856E-05  -.4170927E-04   .2886385E-04   .6895017E-04   .1965679E-04
  -.1850151E-04  -.3526698E-04  -.4470551E-05   .3873753E-04   .5691069E-04
   .5962747E-04   .3413192E-04   .4143536E-04   .5596781E-04   .2697719E-04
  -.4293566E-04  -.5220332E-04  -.6690336E-05  -.1254931E-04  -.8164158E-05
   .2184379E-04   .6832229E-05  -.2746300E-04  -.4382969E-04  -.5743676E-04
  -.4008416E-04   .1650191E-04   .3167697E-04  -.2169300E-04  -.2848865E-04
  -.1553366E-04  -.4689043E-04  -.3796186E-04   .2844696E-04  -.1251795E-04
  -.9622148E-04  -.2301048E-04   .6590573E-04   .1794922E-04  -.7966899E-04
  -.1009163E-03  -.3861673E-04   .3145680E-04   .4311930E-04  -.2049943E-05
  -.2622159E-04   .1835281E-05  -.1723634E-05  -.5376890E-04  -.3466156E-04
   .8773447E-04   .1316814E-03   .2320575E-04  -.8314638E-04  -.6968043E-04
  -.8124826E-05   .3238685E-04   .3336632E-04  -.3150001E-05  -.2362904E-04
   .1083675E-04   .3609089E-04   .2934665E-04   .7370079E-04   .6872079E-04
  -.1131278E-04  -.4985201E-05   .5454726E-06  -.6727116E-04  -.3915757E-04
   .7522417E-04   .1293737E-03   .8060590E-04  -.1824292E-04  -.5142424E-04
  -.8105578E-04  -.8942818E-04   .9533130E-06   .1258438E-03   .1362192E-03
   .7542812E-04   .6200953E-04  -.1328344E-05  -.7585108E-04  -.2880022E-04
   .2022779E-04  -.2439781E-04   .1881822E-04   .6278003E-04  -.6186144E-05
  -.2757233E-04   .1579620E-04   .1411500E-04  -.3626719E-04  -.5337168E-04
   .2262746E-05   .7875194E-05  -.1199602E-04   .1214855E-05   .2588758E-04
  -.3986617E-04  -.6280098E-04   .2311528E-04   .4191409E-04  -.1857013E-04
  -.3760909E-04  -.5716525E-05  -.3292476E-04  -.7380191E-04  -.2158462E-04
   .4639536E-04   .6325200E-04   .4090242E-04  -.5097062E-04  -.7501004E-04
  -.5644488E-05   .2646082E-04   .4772186E-05  -.4479384E-04  -.4686662E-04
   .4453156E-05   .8871644E-05  -.5551544E-05   .2016277E-04  -.5887254E-05
  -.4800782E-04  -.2329780E-04   .4475027E-04   .3322427E-04  -.9792952E-05
   .2274529E-04   .9286888E-05  -.7462602E-04  -.5256003E-04   .3813139E-04
   .4633534E-04  -.2759651E-04  -.1798357E-04   .5032274E-04   .8975885E-07
  -.7925363E-04  -.3894888E-04  -.1648683E-04  -.9740428E-04  -.7920132E-04
  -.1476116E-04  -.1308697E-04   .1894532E-04   .6067290E-04   .3321073E-04
  -.1535982E-04   .2607122E-04   .2548929E-04   .2019812E-05   .1381372E-04
   .2888229E-05  -.1561349E-04  -.8894353E-05  -.2398481E-04   .1821316E-05
   .5064833E-04   .1012404E-04  -.1460473E-04   .2345166E-04   .5008935E-04
   .4177530E-04   .3129558E-04   .3318238E-04   .2911837E-04   .3514208E-05
   .2249694E-05  -.3159796E-04  -.1112755E-03  -.8629531E-04  -.2418367E-04
   .6426162E-05  -.2846620E-05  -.1949792E-04   .1955492E-04   .4960992E-04
  -.3320696E-04  -.8596506E-04  -.2495873E-04   .5575252E-04   .5378009E-04
   .2647463E-04  -.2247576E-04  -.5923938E-04  -.5721534E-04  -.1923642E-04
  -.4314203E-04  -.1018351E-03  -.3656331E-04   .7951300E-04   .8980701E-04
   .2709533E-04  -.1242698E-04   .8355178E-05   .5169013E-04   .6872913E-04
   .2965523E-04  -.9851720E-05  -.5180647E-04  -.9017646E-04  -.8442557E-04
  -.6961417E-04  -.1031948E-03  -.5678232E-04   .4147917E-04   .3971052E-04
  -.6465473E-04  -.1086177E-03  -.8738522E-04  -.1471203E-04   .5712156E-04
   .8501373E-04   .7033932E-04   .6523483E-04   .5654267E-04   .3192756E-04
  -.2484627E-04  -.9527042E-04  -.7321914E-04   .2693815E-04   .1013245E-03
   .1039243E-03   .5509674E-04   .3498585E-04   .6215368E-04   .7544814E-04
   .6234036E-04   .2184830E-04  -.1005797E-05  -.9792192E-06   .8861463E-05
  -.9664605E-05  -.6041129E-04  -.3192207E-04   .6188785E-04   .4932958E-04
   .1409413E-04   .8990225E-05   .1898981E-04   .3849424E-04   .4969749E-05
  -.9253778E-04  -.8959343E-04  -.1284339E-04   .6335263E-04   .1044312E-04
  -.8496323E-04  -.8174658E-04  -.5206670E-04  -.1716022E-04   .3121730E-04
  -.3024664E-05  -.3302888E-04   .1629533E-04   .1310442E-05  -.3454944E-04
  -.1091444E-04   .2358445E-04   .3794844E-04   .4908348E-05   .2395784E-05
  -.9140945E-05   .5659603E-05   .6472382E-04   .7155154E-04   .4825134E-04
   .3951195E-04   .4099078E-05   .1073076E-04   .2986097E-04   .5641609E-04
   .2437984E-04  -.9212236E-04  -.7548478E-04   .1576350E-04   .1240570E-04
   .1895752E-04   .4167815E-04   .7630943E-05  -.1719361E-04   .2820775E-04
   .2056191E-04  -.4574259E-04  -.1929352E-04   .6213674E-04   .4036535E-04
  -.2275050E-04   .8270621E-06   .8169567E-04   .1066368E-03   .6882180E-04
   .5280930E-04   .5272666E-04   .2031637E-04  -.2663053E-04   .2236245E-05
   .2135184E-04  -.3380554E-04  -.9664733E-04  -.5284471E-04   .2947355E-05
  -.9237246E-06   .6118317E-05   .2451563E-04   .1707263E-05  -.2383838E-04
   .1188782E-04   .8884541E-04   .1428829E-03   .1087941E-03   .1536703E-04
  -.1479183E-05   .5889383E-04   .7972915E-04   .6063258E-04  -.1184054E-04
  -.9358311E-04  -.5940658E-04  -.5933152E-06  -.1739284E-04  -.6805433E-04
  -.6202523E-04  -.3562425E-04  -.4082701E-04  -.3006230E-04  -.3024605E-04
  -.5821284E-05   .3268170E-04   .4493501E-04   .2437218E-04   .6531080E-05
   .1257261E-04  -.3574479E-04  -.6244502E-04  -.8110277E-04  -.5773139E-04
  -.2092091E-04  -.9673370E-04  -.1196958E-03  -.1233528E-05   .5634236E-04
   .2784652E-04   .1955328E-04  -.9522914E-07  -.9714486E-04  -.1109597E-03
  -.2748685E-04   .3910977E-04   .3809213E-04  -.3870239E-07   .4122282E-05
   .3450599E-04   .4480191E-04   .2614387E-04  -.1901682E-06  -.1797178E-04
  -.5388555E-04  -.3728410E-05   .4392942E-04  -.1749695E-04  -.6501407E-04
  -.3287016E-04   .1741204E-04   .5491796E-05  -.1226401E-04   .1198108E-04
  -.4624997E-04  -.1137767E-03  -.1253874E-03  -.1364914E-03  -.8944777E-04
  -.1394701E-04   .6702288E-04   .1807288E-03   .1728214E-03   .6188700E-04
  -.1315309E-04  -.3900573E-04  -.1684932E-04   .1566949E-04   .4393500E-04
   .2922005E-04  -.5039911E-05  -.3699472E-04  -.2055425E-04  -.2491511E-05
  -.2616247E-04  -.7271550E-04  -.7269262E-04   .3188879E-04   .8438240E-04
  -.2918722E-04  -.8797493E-04  -.2158844E-04  -.1242190E-04  -.2417552E-04
   .7560491E-05  -.2578480E-04  -.3182233E-04   .3330063E-04   .9375529E-04
   .1084822E-03   .7990768E-04   .1813783E-04   .1805581E-04   .9470849E-04
   .8818639E-04  -.9986491E-05  -.1100534E-03  -.1430182E-03  -.2489907E-04
   .7027680E-04   .2152922E-04  -.3528457E-04  -.1940914E-04  -.2789315E-04
  -.2911908E-04   .3709708E-04   .7169763E-04   .3653676E-04  -.8573304E-05
  -.4507328E-05  -.3513320E-05  -.1403186E-04  -.1328097E-05  -.1145505E-05
  -.4094084E-04  -.9012739E-04  -.2495780E-04   .1246735E-03   .1580273E-03
   .2186406E-04  -.3479511E-04   .5663824E-04   .1068351E-03   .3604378E-04
  -.8118911E-05   .1173053E-04   .1333422E-04   .4067612E-05  -.1127445E-04
  -.4457557E-04  -.1125703E-03  -.1612077E-03  -.1445817E-03  -.3983552E-04
   .1031661E-03   .1372452E-03   .6236185E-04   .1239400E-04   .2323289E-04
   .3318313E-04  -.1124629E-04  -.6749955E-04  -.6291292E-04  -.1544572E-04
  -.8668200E-05  -.8975297E-04  -.6083446E-04   .6296066E-04   .1073262E-03
   .1033915E-03   .6669403E-04   .4790537E-04   .8003942E-04   .5416287E-04
  -.6622266E-05  -.4096361E-04   .3439945E-04   .1124300E-03   .3501373E-04
  -.3681829E-04  -.3136751E-04  -.2048640E-05   .4782559E-04   .4458864E-04
  -.4446711E-04  -.9454316E-04  -.1518555E-04   .8148294E-04   .9324262E-04
   .9155376E-04   .7668566E-04   .6596992E-04   .1396376E-04  -.1000476E-03
  -.7885860E-04   .2130145E-04   .3179616E-04  -.4059604E-06  -.2095279E-04
  -.3886537E-04  -.4777145E-04   .2528453E-04   .9505415E-04   .7324536E-04
  -.1094507E-04  -.1203033E-03  -.1213161E-03  -.6459521E-04  -.1446978E-04
   .3781485E-04   .3024213E-04   .1112798E-04   .1368763E-04   .4129414E-05
   .8719359E-05   .2182666E-04  -.3658937E-05  -.2582666E-04   .1190424E-05
   .4757045E-04   .5547956E-04  -.7981854E-05  -.4242073E-04  -.4103197E-04
  -.1472161E-04   .1878569E-04   .8742351E-04   .1153816E-03   .5364447E-04
  -.2522053E-04  -.3933606E-04   .7385555E-05   .5038156E-04   .6207754E-04
   .3748447E-05  -.6456484E-04  -.2891203E-04   .1313148E-04  -.5646238E-04
  -.9017975E-04  -.5283141E-04  -.3766348E-04  -.9130539E-05   .1504220E-04
  -.3935564E-04  -.8576469E-04  -.1826880E-04   .7856015E-04   .6735655E-04
  -.4092221E-05  -.1957967E-04   .6712333E-05   .4923565E-04   .7410989E-04
   .1065788E-03   .9947483E-04   .1373509E-04  -.4134904E-04  -.1467723E-04
   .2427436E-04   .8847631E-04   .1020324E-03   .3491692E-04   .1293403E-04
   .3082969E-05  -.9906948E-05   .2343574E-04   .8685640E-05  -.6155466E-04
  -.6558691E-04   .5865965E-05   .3822123E-04   .1322373E-04   .1984550E-04
   .1104571E-04  -.2973223E-04  -.1937931E-04   .5426654E-04   .9279465E-05
  -.8064537E-04  -.5274542E-04   .1521201E-04   .4986644E-04   .1252684E-04
  -.3224075E-04   .1112934E-04   .9257047E-04   .4322494E-04  -.6474691E-04
  -.4476504E-04   .2554746E-04   .1916251E-04   .1496785E-05   .1088318E-04
  -.5578385E-05  -.3494798E-04  -.2679563E-04   .6520720E-04   .1438048E-03
   .4804766E-04  -.2668380E-04   .2323618E-04   .4603658E-04   .4435527E-04
   .4718789E-04   .6258109E-04   .2458716E-04  -.7129696E-04  -.7628578E-04
  -.4812806E-04  -.3224438E-04  -.6356298E-05   .8578991E-05   .4021418E-04
   .5111572E-04   .3153632E-04   .1961553E-04   .8192937E-05  -.5379263E-04
  -.8890852E-04  -.5306737E-04  -.4805890E-04   .5640651E-05   .7287656E-04
   .3707360E-04  -.3323114E-05  -.5133771E-05  -.3742959E-04  -.6970441E-04
  -.6689505E-04  -.2191602E-04   .4738730E-05   .3682559E-05  -.1815932E-06
   .4440252E-04   .7891128E-04   .2641525E-04   .2431783E-05   .2180118E-04
  -.2651251E-04  -.1561972E-04   .4095896E-04   .4669387E-04   .1717478E-04
  -.3908139E-04  -.9778423E-04  -.5033387E-04   .3300096E-04   .5786074E-04
   .5756820E-04   .4410341E-04   .2494367E-04   .1463551E-04  -.4122383E-04
  -.1122265E-03  -.2223207E-04   .1998934E-04  -.1134596E-03  -.1680471E-03
  -.5694318E-04   .6922581E-04   .6626381E-04  -.1656087E-04  -.4880946E-04
   .9459748E-05   .4810161E-04  -.4312075E-04  -.8118928E-04   .2201113E-04
   .4406882E-04  -.8826581E-04  -.8544991E-04   .5131307E-04   .9052530E-04
   .2475696E-04  -.2562259E-04  -.1225554E-04  -.5903380E-05  -.3117299E-04
  -.3205086E-04  -.2929572E-04  -.9304345E-04  -.7951775E-04  -.8109922E-05
   .2911547E-04   .3982941E-04   .4964500E-04   .2669769E-04   .5970689E-04
   .1267717E-03   .3994026E-04  -.6253819E-04  -.2712285E-04   .4089008E-04
   .3755864E-04  -.1823713E-04  -.3948821E-04  -.7949212E-05   .4239301E-05
   .8823982E-05   .1478478E-04  -.9299997E-05  -.5446155E-04  -.1235847E-03
  -.1429095E-03  -.4344709E-04   .3995206E-04   .2518998E-04   .3608607E-04
   .7694708E-04   .4844467E-04  -.7520664E-04  -.1579363E-03  -.6270641E-04
  -.1603931E-06  -.2410241E-04  -.1108067E-04   .3006939E-04   .3262046E-04
  -.1257947E-04  -.3562904E-04   .1518584E-06   .3732228E-04   .2821632E-04
  -.7376848E-05  -.2784252E-05   .3583417E-04   .6938318E-04   .4568962E-04
  -.1544765E-04  -.6533116E-04  -.8849886E-04  -.8028256E-05   .4454986E-04
  -.8441456E-05  -.2437867E-05   .4552408E-04   .2922311E-04  -.4090199E-04
  -.3969831E-04  -.3065338E-04  -.6986764E-04  -.1009952E-04   .8699496E-04
   .7646512E-04   .2260133E-04  -.7001109E-05  -.3651039E-04  -.2865040E-04
   .2976621E-05   .3819302E-04   .1354353E-04  -.2096446E-04   .3314786E-04
   .9053286E-04   .7280820E-04   .5712401E-04   .8844667E-04   .1186015E-03
   .7584169E-04   .4849976E-06  -.7210905E-04  -.9131048E-04  -.2238077E-04
   .3203468E-04  -.5518440E-06  -.3787256E-04  -.7515900E-05   .3418606E-04
   .2005155E-04  -.4324408E-04  -.2187114E-04   .2388350E-04  -.6023044E-04
  -.7946680E-04   .1923136E-04   .7086910E-04  -.1295497E-04  -.7737563E-04
  -.5440392E-04  -.1427841E-04  -.4038796E-05  -.3599655E-04  -.4823922E-04
  -.8099055E-04  -.6963021E-04  -.1651452E-04  -.1115323E-04  -.9196357E-06
  -.2629657E-04  -.3864208E-04   .2900238E-04   .3892560E-04  -.5966691E-04
  -.6288390E-04   .1290049E-04   .2141970E-04   .5403863E-05   .1308634E-05
  -.4173430E-04  -.4480637E-04   .6546643E-05  -.4592080E-04  -.1151054E-03
  -.7004249E-04   .1129762E-04   .1713645E-04   .4821335E-05   .1933853E-04
   .4221695E-04   .6323853E-04   .5236471E-04   .1758899E-04  -.1265368E-04
   .7896452E-05   .7049854E-04   .8482706E-04   .2886203E-04   .2172862E-04
   .4317549E-04   .3777326E-04   .5983223E-05  -.5152645E-04  -.7381160E-04
  -.8895320E-04  -.1081233E-03  -.5250360E-04   .3939636E-05   .3067251E-04
   .4901558E-04   .2061587E-04   .1544344E-05   .1067902E-04  -.7100601E-05
  -.3684819E-04  -.3516680E-04   .7394100E-05   .1846535E-04  -.1538637E-04
   .3651546E-04   .6726514E-04   .1981874E-04   .1074175E-04   .5183483E-05
  -.2993750E-04  -.1968012E-04   .5104576E-04   .7544688E-05  -.9942770E-04
  -.1111454E-03  -.6426237E-05   .5738144E-04  -.3066989E-04  -.4357856E-04
   .8565914E-04   .1285092E-03   .2780839E-04  -.8656586E-05   .9384499E-04
   .1583088E-03   .9240547E-04   .3771529E-04   .6254562E-05  -.8257195E-04
  -.1361175E-03  -.9604309E-04  -.4831517E-05   .3526580E-04   .1992702E-05
  -.2195345E-04  -.7648236E-04  -.1546755E-03  -.1189631E-03  -.1333706E-04
   .7191748E-04   .9162086E-04   .4940710E-04   .1644676E-04   .1683984E-04
   .4621599E-04   .6877943E-04  -.2843388E-04  -.9385783E-04  -.7497358E-04
  -.6718777E-04  -.1329894E-04   .4455804E-05  -.6295913E-04  -.1136134E-03
  -.1071353E-03  -.8080218E-04  -.4956943E-04  -.2075588E-04  -.3795298E-05
  -.5689546E-04  -.1246825E-03  -.1017832E-03  -.4928562E-04  -.6395397E-05
  -.1495571E-04  -.5548114E-04  -.2389755E-04   .9813854E-05  -.5951592E-04
  -.8176573E-04  -.1206904E-04   .2063741E-04   .1522206E-04   .3113854E-04
   .5616242E-04   .2721684E-04  -.1324958E-04  -.5345244E-04  -.3990929E-04
   .3094270E-04   .2889567E-04  -.2939753E-04  -.4903861E-04  -.3402350E-04
  -.1589940E-04   .2178326E-05   .9358547E-05   .4176857E-04   .3928131E-04
  -.3779956E-04  -.6105014E-04  -.3221343E-04  -.9842368E-04  -.1290773E-03
  -.3703079E-04   .3212614E-04   .7454131E-04   .1051135E-03   .5930630E-04
   .1673497E-04  -.4955229E-04  -.1184165E-03  -.1078546E-03  -.8840736E-04
  -.6462395E-04  -.1337952E-04   .3621308E-04  -.2326382E-04  -.1317162E-03
  -.1217552E-03  -.1676838E-04   .3699435E-04   .4385819E-04   .9306837E-05
  -.2462128E-04   .3157281E-05   .1354392E-04  -.4641925E-04  -.1568500E-04
   .5394521E-04   .5731555E-04   .1164106E-04  -.4884413E-04  -.6924250E-04
  -.4738865E-04   .2756910E-04   .6671952E-04   .3599771E-04  -.2596541E-04
  -.6388872E-04  -.9136088E-05   .6666114E-04   .3309466E-04  -.3433851E-04
  -.8176724E-04  -.1483630E-03  -.8579470E-04   .3856879E-04   .6785108E-04
   .4265019E-04   .5345487E-04   .4950497E-04   .1283602E-04   .4818340E-04
   .1208975E-03   .1026027E-03   .6805511E-04   .5315800E-04  -.5783938E-05
  -.3850080E-04  -.4237499E-04  -.6145679E-05   .2645923E-04   .1795889E-04
   .2861277E-04   .2062074E-04   .1321434E-04   .2399969E-04   .3743602E-04
  -.7226958E-06  -.9113607E-04  -.5188945E-04   .1696921E-04   .2877768E-05
   .1013416E-04   .1744252E-04  -.9514353E-04  -.8978232E-04   .5172764E-04
   .9458464E-04   .4762161E-04   .4292946E-04   .5214940E-04   .3909379E-04
   .8557173E-05  -.3757069E-04  -.2060318E-04   .2366086E-04   .4679227E-05
  -.2657112E-04  -.1779963E-04  -.4299783E-04  -.9299076E-04  -.8788508E-04
  -.4128543E-04  -.1227668E-03  -.2138242E-03  -.8057446E-04   .2773287E-04
  -.5506560E-04  -.8261747E-04   .2110696E-04   .5506444E-04   .2176911E-04
   .1628115E-04   .4260895E-04   .7215079E-04   .5926254E-04   .3177410E-04
   .3814084E-07  -.6515962E-04  -.3439913E-04   .4809642E-04   .9182218E-05
  -.5855346E-04  -.4166786E-04   .1112221E-04   .1601953E-04   .2502751E-05
   .3081278E-05   .5342342E-04   .7825684E-04  -.1625290E-04  -.8493732E-04
   .9145007E-05   .1085239E-03   .8061150E-04   .2022583E-04   .2278539E-04
   .7632002E-04   .7304371E-04  -.5615786E-04  -.1222799E-03  -.3086531E-04
   .5832711E-04   .5235886E-04   .2613833E-04  -.1063448E-04  -.8700754E-04
  -.4586401E-04   .8495667E-05  -.3742955E-04  -.5712993E-04  -.1453543E-04
  -.1596453E-04  -.6734296E-06   .5830532E-04   .7928799E-04   .4371728E-04
  -.5886299E-04  -.7320691E-04   .3350455E-04   .8226551E-04   .4379228E-04
   .9147730E-05  -.2330560E-04  -.4570809E-04   .1351506E-04   .6417385E-04
   .3903445E-04  -.9210867E-05  -.1390976E-05   .4161396E-04   .7515768E-04
   .4104377E-04  -.4480929E-04  -.6359707E-04   .1478094E-04   .6386287E-04
   .2006273E-04   .1995756E-04   .8027129E-05  -.2945652E-04  -.7653951E-04
  -.4634232E-04  -.3078586E-04  -.9570264E-04  -.3297876E-04   .8979354E-04
   .8975380E-04   .2720889E-04   .3920267E-05  -.9869977E-05  -.1219989E-04
   .4573181E-04   .8741514E-04   .2406934E-04  -.2721330E-04   .1525944E-04
   .4423492E-04   .2463292E-04  -.5005723E-04  -.5492503E-04  -.5990853E-05
   .2627937E-04   .3488680E-04   .1420664E-04  -.4317257E-04  -.5543815E-04
   .2117551E-04   .9554047E-04   .1054619E-04  -.8194443E-04  -.3418911E-04
  -.2593260E-04  -.1382129E-04   .1814325E-04  -.5856742E-04  -.6887415E-04
   .2615592E-04   .8448691E-04   .2302641E-04  -.2723702E-04   .5593997E-07
  -.2907806E-04  -.4289999E-04  -.2801781E-04  -.5110687E-04  -.5447062E-04
  -.5921921E-04  -.1099112E-03  -.5796426E-04   .6955050E-04   .6851173E-04
  -.3369898E-05   .1707915E-04  -.6114131E-04  -.1092144E-03  -.1579844E-04
   .6921451E-04   .8374642E-04   .4946924E-04   .2606959E-04   .1734579E-04
   .1912912E-04   .6342994E-04   .5938148E-04   .3781717E-04  -.1450107E-04
  -.8787550E-04  -.5814050E-04   .4143689E-05   .3837780E-04   .6411106E-04
   .4876614E-04  -.1443728E-05  -.1151697E-05   .5403309E-05  -.6307207E-04
  -.8762894E-04  -.3109721E-04   .1906746E-04   .1880812E-04   .3884824E-04
   .4513862E-04   .7634949E-05  -.2468610E-04  -.7779072E-04  -.6967103E-04
  -.1967662E-05   .2033935E-04   .5772108E-05  -.5857710E-05  -.7653570E-05
  -.2152440E-04   .1785122E-04   .6546773E-04   .8592204E-04   .7645822E-04
   .1149179E-04  -.3257846E-04  -.1068889E-04   .8684625E-05   .6860926E-05
   .4860741E-05   .3257455E-04   .1813858E-04  -.2120955E-04   .4814674E-05
   .6819181E-04   .5219811E-04  -.3513354E-04  -.2523580E-04   .5296889E-04
   .4500400E-04   .5975019E-05   .1625490E-04   .1875289E-04  -.2734739E-04
  -.4073744E-04  -.3724826E-04  -.6313308E-05   .2488207E-04  -.4542585E-06
  -.2007343E-04   .4070461E-04   .9656467E-04   .6654930E-04   .2088957E-04
   .1689228E-04   .2540336E-04  -.3107142E-04  -.1345186E-03  -.1109309E-03
   .1193736E-04   .4541587E-04  -.1679972E-04  -.1785656E-04  -.1969735E-04
  -.5142624E-04  -.6546495E-04  -.1395972E-04   .3263231E-04   .1207824E-04
   .1029505E-04   .5811894E-04   .5709075E-04   .1351137E-05  -.1412850E-04
  -.2057988E-04  -.5703481E-04  -.5366746E-04   .1664949E-04   .5439181E-04
  -.4863735E-04  -.1169614E-03  -.4964000E-04  -.2581663E-04  -.6469348E-04
  -.1154834E-04   .8779503E-04   .6137057E-05  -.1586710E-03  -.1294883E-03
   .2664841E-04   .1060026E-03   .5746048E-04  -.1476425E-04   .2641395E-05
   .6040615E-04   .3799448E-04   .5887652E-05   .1008112E-04   .6941170E-05
   .1379648E-05   .5711486E-05   .4214614E-04   .6798115E-04   .6076393E-04
   .2582125E-04   .3400351E-04   .4397101E-04   .5484562E-05   .8779386E-05
   .3350057E-04  -.3770900E-04  -.1039972E-03  -.1040584E-03  -.3569823E-04
   .1262946E-04   .1331120E-04  -.1189101E-04  -.5068754E-04  -.9136670E-04
  -.3157754E-04   .6294539E-04   .4761973E-04   .4277398E-05   .2408384E-04
   .6275115E-04   .1581290E-04  -.6987391E-04  -.7181980E-04  -.3731346E-04
  -.3113490E-04   .1826760E-04   .5853079E-04   .5342046E-04   .5755683E-04
   .4398458E-04   .1021873E-05  -.8583113E-06   .2920087E-04   .4096904E-04
   .3153311E-04   .3606178E-04   .5342166E-04   .2630193E-04  -.1175936E-04
  -.5106286E-04  -.6334200E-04  -.8227041E-04  -.1132728E-03  -.8973503E-04
  -.4887234E-04   .7290237E-06   .2941975E-04   .6930288E-05   .2103086E-04
   .9279686E-04   .1003599E-03   .7398770E-04   .7914178E-04   .9496555E-04
   .9594572E-04   .7482464E-04  -.9583353E-05  -.9170862E-04  -.2286376E-04
   .5658994E-04   .1597674E-04  -.4627304E-04  -.3248454E-04   .6184874E-04
   .1407974E-03   .1285866E-03   .6779205E-04   .3876932E-05  -.3014412E-05
   .2589597E-04   .4556823E-04   .6197983E-04   .3502933E-04  -.5431527E-04
  -.9651432E-04  -.2583221E-04   .3770230E-04   .4749374E-05  -.3559280E-04
   .1865753E-05   .7823582E-04   .8901451E-04   .1340008E-04  -.7697601E-04
  -.1282063E-03  -.3441521E-04   .6549917E-04   .4874325E-04  -.3005256E-04
  -.7488018E-04  -.2156599E-04   .2318628E-04  -.2793963E-04  -.6929649E-04
  -.1970200E-04   .6654784E-04   .2724439E-04  -.1185479E-04   .3131961E-04
   .4422583E-04   .1849237E-04  -.6330522E-04  -.7151518E-04   .3029766E-04
   .7612619E-04   .3973550E-04   .5431770E-05  -.2592509E-04  -.6689383E-04
  -.5408456E-04  -.9236913E-05  -.2117687E-04  -.2504639E-04  -.1773348E-04
  -.2455856E-04  -.5203460E-04  -.9894176E-04  -.8456665E-04  -.1427315E-04
   .5619511E-04   .7189002E-04   .4655406E-04  -.2059662E-04  -.7462640E-05
   .8036405E-04   .6575213E-04  -.1064331E-04  -.6516398E-04  -.6046060E-04
  -.1400364E-04   .4972181E-04   .5295634E-04  -.5339434E-07  -.1497931E-04
  -.2202587E-04  -.5952466E-04  -.4701475E-04   .4698721E-04   .9462991E-04
   .3116681E-04  -.1008549E-04   .1633899E-04   .3260218E-04  -.2281178E-04
  -.1071250E-03  -.8535129E-04   .1027686E-04   .6232503E-04   .7574168E-04
   .8828405E-04   .5976934E-04  -.5545420E-04  -.8992010E-04  -.2098840E-04
  -.3604101E-04  -.1006687E-03  -.1792114E-04   .9673213E-04   .8436082E-04
   .3347924E-05  -.5445189E-04  -.2340233E-04   .3660691E-04   .2690501E-04
  -.2813536E-04  -.6633384E-05   .3058905E-04   .5223573E-04   .5648329E-04
   .6959192E-04   .8141171E-04   .4593058E-04  -.2673221E-04  -.7996430E-04
  -.6436397E-04  -.2902691E-04  -.7211146E-05   .4787945E-04   .8045202E-04
   .2867481E-04  -.1484130E-04  -.1602243E-04   .1083913E-04   .3211189E-04
   .3206146E-04   .2609219E-04   .1759897E-04  -.1314529E-04  -.3846259E-04
  -.4080290E-04  -.1572617E-04   .4152902E-04   .5199671E-04  -.8734551E-05
  -.3207985E-04   .2873957E-04   .8145922E-04   .9324435E-04   .3640629E-04
  -.4606196E-05   .2193798E-04   .7507428E-04   .8954894E-04   .6531729E-04
   .8211743E-04   .3678424E-04  -.1011848E-03  -.8531983E-04   .4709599E-04
   .3740045E-04  -.5957291E-04  -.7390318E-04  -.6660098E-04  -.4700908E-04
  -.3030237E-04   .1252517E-04   .1221205E-04  -.1349076E-04   .1658814E-04
   .2254970E-04   .1905246E-04   .4976100E-04   .5528834E-04   .2875168E-04
   .1711942E-04   .1499015E-04  -.1227376E-04  -.3303303E-04  -.9258483E-05
  -.2539092E-04  -.8836800E-04  -.6457833E-04  -.2009348E-05   .7525849E-05
  -.4568149E-04  -.6889344E-04  -.3278068E-04   .7554823E-05  -.1162908E-04
  -.7958316E-04  -.7688803E-04   .3606506E-04   .6525988E-04   .6884470E-05
  -.1008704E-04   .6601093E-04   .7047615E-04  -.3713062E-04  -.9247265E-04
  -.8606855E-04  -.7780942E-04  -.3890502E-04   .4937842E-04   .1061883E-03
   .9223115E-04   .3407955E-04  -.3296032E-04  -.6972461E-04  -.2951855E-04
  -.2214191E-04  -.7960591E-04  -.8755166E-04  -.1083966E-03  -.9407739E-04
  -.2985693E-04   .2417449E-04   .2999862E-04  -.1173757E-04  -.4116530E-04
  -.3266819E-04   .2891073E-04   .7657669E-04  -.1004691E-04  -.6124908E-04
  -.3053853E-04  -.8122908E-05   .4455359E-05  -.4495123E-04  -.1628257E-03
  -.1352786E-03   .1256206E-05   .4206365E-05  -.1247273E-03  -.1210111E-03
  -.1998565E-05   .3513533E-04   .1468712E-04   .1089162E-04  -.1569758E-04
  -.4677621E-04   .9438356E-05   .6282542E-04   .4729135E-04   .1541561E-04
  -.3364028E-04  -.9011101E-04  -.5380788E-04  -.3335475E-05  -.4416469E-05
   .4036116E-05   .3069223E-04   .3090697E-04  -.3313070E-06   .9551680E-05
   .6344862E-04   .4141456E-04  -.6572887E-04  -.5039277E-04   .3679993E-04
  -.2145314E-04  -.6825723E-04   .1004951E-04   .3851701E-04  -.2831772E-04
  -.6508737E-04   .2186656E-05   .3863855E-04   .1293318E-04  -.3672023E-05
   .2937381E-04   .2169063E-04  -.3617688E-04  -.6105220E-04   .1543082E-04
   .5193474E-04  -.2529860E-04  -.7353220E-04  -.2567504E-04   .5508993E-04
   .7901212E-04   .5672754E-04   .1468893E-04  -.1494197E-04  -.2750028E-04
  -.1446766E-04  -.8557748E-04  -.1508693E-03  -.1263347E-03  -.2171133E-04
   .5274866E-04   .4839818E-04   .3425300E-04   .5912441E-04   .5100987E-04
   .4171497E-05  -.3642556E-04  -.9166094E-04  -.2238613E-04   .9144002E-04
   .9383166E-04   .6740884E-04   .6380553E-04   .1769569E-04  -.2086563E-04
   .3005262E-04   .3896426E-04  -.5350879E-04  -.7422172E-04  -.4715966E-04
  -.3601232E-04  -.1513135E-04   .5166700E-04   .9740113E-04   .5608481E-04
  -.1824949E-04  -.4755657E-04  -.1721926E-04   .4898292E-04   .5751396E-04
  -.5628723E-05  -.3011085E-04   .3464036E-04   .5239201E-04  -.3976259E-04
  -.1140548E-03  -.9232344E-04   .6030485E-05   .8167990E-04   .8491099E-04
   .8982414E-04   .7956560E-04   .6509315E-04   .3686684E-04  -.2780478E-05
  -.2447622E-04  -.8376353E-04  -.1044315E-03  -.2234722E-04   .5053701E-04
   .4026354E-04  -.1561735E-04  -.3499146E-04   .5527654E-05   .4083673E-04
   .3908908E-04   .1947936E-04  -.1340469E-04  -.3525749E-04  -.3582713E-04
  -.2031923E-04   .3384063E-05   .1216383E-04   .3477150E-04   .6120854E-05
  -.6156755E-04  -.7887538E-04  -.3908913E-04   .6118240E-04   .9107358E-04
   .4100911E-04   .5598296E-05  -.2326416E-04  -.6270183E-04  -.5998063E-04
  -.3882677E-04  -.5299056E-04  -.6219498E-04  -.7443562E-04  -.6360950E-04
   .1046028E-04   .3822656E-04   .3141237E-05  -.5040713E-04  -.7627941E-04
  -.7937715E-04   .1382956E-05   .6546298E-04   .4561637E-04  -.4992692E-04
  -.1780363E-03  -.1715924E-03  -.3051600E-04   .2790555E-04  -.1091455E-03
  -.9757804E-04   .5541463E-04   .9753899E-04   .7367085E-05  -.1165306E-04
   .1815317E-04   .2878140E-04   .4059745E-04   .5822908E-04   .2075076E-04
  -.3228198E-04  -.3390936E-04   .2314277E-04   .6896900E-04   .3481663E-04
   .3218254E-05   .3201681E-04   .6521720E-04   .3327868E-04  -.1996138E-04
  -.8226578E-04  -.6983338E-04  -.5094341E-05  -.1879690E-04  -.3496283E-04
   .4099065E-04   .9676725E-04   .3895115E-04   .5415223E-05   .5103137E-04
   .8764684E-04   .1025062E-03   .8439277E-04   .2861799E-04  -.8248188E-04
  -.6581661E-04   .7684778E-04   .1466746E-03   .4071617E-04  -.8504368E-04
  -.8899530E-04  -.4671395E-04  -.4178444E-05  -.1211476E-04  -.5035928E-04
  -.3796701E-04  -.2740349E-04  -.1019047E-04  -.2516686E-04  -.7271477E-04
  -.1213601E-04   .5507103E-04   .2523938E-04  -.8320920E-06   .3251178E-04
   .5929474E-04  -.1721345E-04  -.8769580E-04  -.2193322E-04   .8164442E-04
   .6405788E-04  -.3544887E-04  -.3517715E-04   .3157983E-04   .7098743E-04
   .1075130E-03   .1105602E-03   .5659382E-04   .2868557E-04   .4592107E-04
   .3176289E-04  -.3315898E-04  -.1389901E-03  -.1029333E-03  -.1276043E-04
  -.4647330E-04  -.1147667E-03  -.5311118E-04   .4806989E-04   .3568494E-04
  -.7430096E-04  -.9645710E-04  -.4117820E-04  -.5504883E-04  -.1055697E-03
  -.4647356E-04   .4555222E-04   .5995715E-04   .4022916E-04   .5909134E-04
   .2727252E-04  -.1062732E-03  -.1768213E-03  -.1503936E-03  -.4485514E-04
   .1334502E-04   .6187744E-05   .2903077E-04   .1298787E-04  -.4538482E-04
  -.2347845E-04   .2298816E-04  -.1924273E-04  -.3223331E-04   .6004761E-04
   .5362924E-04  -.3360825E-04  -.2137576E-04  -.8932994E-05  -.3455682E-04
  -.2821134E-04  -.9495980E-06  -.2448354E-04  -.6772424E-04  -.8168306E-04
  -.6132427E-05   .4932353E-04   .4726985E-04  -.2027375E-04  -.4693328E-04
  -.4104710E-05   .3061444E-04   .1923088E-04  -.5310073E-04  -.1684754E-04
   .1115746E-04  -.2678945E-04  -.3155044E-04  -.2148420E-05  -.2285481E-04
  -.4830150E-04  -.3239445E-04  -.2549266E-04  -.4217470E-04  -.2621422E-04
  -.3929722E-04  -.4850587E-04   .5138950E-04   .8346623E-04   .1567249E-04
   .7316112E-04   .1334758E-03   .4576913E-04  -.4704350E-04  -.4043581E-04
   .4096600E-04   .1091085E-03   .5476751E-04  -.2778097E-04   .2541407E-05
   .5902593E-04   .2419961E-04  -.1904345E-04  -.6371395E-04   .1142944E-04
   .8684471E-04   .7183039E-04   .4773166E-04   .2807081E-04   .4624456E-04
   .5854433E-04   .4257604E-04   .2154591E-04   .2700860E-06   .1147584E-04
   .2822827E-04   .1761303E-04   .5140835E-04   .5827589E-04  -.5316167E-04
  -.2621243E-04   .9671422E-04   .6474576E-04  -.1474118E-05  -.4057398E-04
  -.3537907E-04  -.2855125E-04  -.1328283E-03  -.1528983E-03  -.3053794E-04
   .4835617E-04   .5452106E-04   .1145440E-04  -.3192882E-04  -.1760176E-04
   .4155435E-04   .3190742E-04  -.1684743E-04  -.7352975E-06   .3920595E-04
   .6558596E-04   .9134072E-04   .5207845E-04   .6256228E-06  -.3336567E-05
   .4848735E-04   .5009925E-04  -.1515496E-04  -.2521948E-05   .2446651E-04
   .2960755E-04   .3615978E-05  -.5190023E-04  -.4314976E-04  -.7660862E-04
  -.8737687E-04  -.4572102E-04  -.4140144E-04  -.4448997E-04  -.3104041E-04
  -.2457867E-05   .5028325E-04   .7589244E-04   .6585097E-04   .1313837E-04
  -.2578159E-04   .5183716E-05   .3503515E-04   .1500524E-04  -.1712335E-04
  -.8137332E-04  -.1083835E-03  -.4652158E-04   .1388793E-04  -.1932068E-04
  -.5425286E-04  -.4395588E-04  -.4866430E-04  -.3515002E-04  -.1084365E-04
  -.4742447E-04  -.4165424E-04  -.6446571E-05  -.8456760E-05  -.1747935E-04
   .1259110E-04   .3690869E-04  -.1532494E-05  -.6370416E-04  -.3346426E-04
   .7658293E-04   .6780492E-04  -.1292856E-04  -.1844999E-04   .9386215E-05
   .1194230E-04  -.3519004E-04  -.4416963E-04  -.4965614E-05  -.1155778E-04
  -.4415410E-05   .1756171E-04  -.2258123E-04  -.5055989E-04  -.4136698E-04
  -.3749389E-04  -.4209561E-05   .5190660E-04   .7382637E-04   .5106634E-04
   .4785295E-04  -.1343719E-04  -.5467180E-04  -.1039395E-03  -.1580950E-03
  -.1016846E-03  -.1665037E-05   .2765286E-04  -.1939082E-04  -.1605934E-04
   .5441917E-04   .1296353E-03   .1279523E-03   .5236743E-04  -.1730316E-04
  -.4301521E-04  -.5469541E-04  -.3483342E-04   .1187590E-04   .1102804E-04
  -.1956458E-04  -.3249217E-04  -.4055645E-05   .2246431E-04  -.6412162E-04
  -.1006886E-03  -.3702053E-04   .1962903E-05  -.4033800E-05   .1345223E-04
   .2715152E-04  -.1632945E-04   .5502638E-05   .8523168E-04   .4434915E-04
  -.2401436E-04  -.7112119E-04  -.8796308E-04   .2010173E-05   .8717801E-04
   .8686999E-04   .2439579E-04   .1434108E-04   .5959089E-04   .4451444E-04
   .2499160E-04   .6825905E-04   .1130860E-03   .9502382E-04   .2440650E-04
  -.5786709E-05   .4088608E-06   .3197118E-04   .7380756E-04   .6179483E-04
  -.1136059E-04  -.5367664E-04   .1715600E-04   .6802971E-04   .1441740E-04
  -.2190633E-04   .2843747E-04   .5060017E-04   .6510167E-04   .6918163E-04
  -.4989378E-05  -.7494274E-04  -.1038745E-03  -.5697884E-04   .7446102E-05
  -.8198900E-05   .6791416E-05   .9781696E-04   .7951527E-04  -.5417949E-04
  -.6943095E-04   .1625422E-05   .3564235E-04  -.1497526E-04  -.8752744E-04
  -.5088527E-04   .1506064E-04   .2187907E-04  -.2868720E-04   .1828974E-04
   .1599728E-03   .1202564E-03  -.1851132E-04  -.2448885E-04   .1672174E-04
  -.4482331E-04  -.8081751E-04  -.3674615E-04  -.6689985E-05   .1344392E-05
   .3752170E-04   .2706064E-04  -.3699641E-05   .3652610E-04   .6823975E-04
   .5877916E-04   .5362936E-04   .4276153E-04   .8071779E-04   .5090933E-04
  -.8475122E-04  -.8196389E-04   .4948731E-04   .1456452E-03   .1361172E-03
   .7525801E-04   .4867781E-05  -.4344601E-04  -.5676896E-04   .8258774E-06
   .7816944E-04   .5999938E-04  -.3863595E-04  -.6101211E-04  -.6579787E-05
  -.3215853E-04  -.1117877E-03  -.8100920E-04   .2065397E-04   .6594675E-04
   .2580631E-04  -.2663786E-04  -.4455554E-05   .1973723E-04   .4909895E-04
   .1918876E-04  -.3965829E-04  -.1050052E-03  -.5613497E-04   .3282124E-04
   .5755403E-04   .1096081E-03   .9755513E-04   .1306638E-04  -.3261299E-04
  -.8144854E-04  -.9969001E-04  -.7007252E-04  -.7593978E-04  -.5785803E-04
   .2989329E-04   .1215641E-03   .9036376E-04   .2556885E-05  -.4191169E-04
  -.8285226E-04  -.2136223E-04   .8134876E-04   .1288430E-03   .7696340E-04
  -.5219219E-05  -.2177863E-05   .2142422E-04   .2937208E-05   .4074636E-04
   .5983100E-04   .7418522E-04   .1239088E-03   .1140268E-03   .2782460E-04
  -.1572949E-04   .3113807E-05   .3891253E-04  -.1593185E-04  -.7749446E-04
  -.4325042E-04  -.2378063E-04  -.2200833E-04   .4882314E-04   .6135336E-04
  -.1053034E-03  -.1708820E-03  -.2856290E-04   .6006423E-04   .5935450E-05
  -.1350185E-04  -.1141216E-04  -.4486288E-05   .2189310E-05   .1099039E-04
  -.1048329E-04  -.4942721E-04  -.1561672E-04   .3434447E-04   .1352148E-04
  -.3112773E-04  -.1176260E-04   .8376516E-04   .8318731E-04  -.1233812E-04
  -.1894802E-04  -.6996607E-05   .1560359E-04   .4796026E-04   .4934229E-05
  -.5181945E-05   .5044161E-04   .3620696E-04  -.2482745E-04  -.4319204E-04
  -.2589205E-04  -.2157060E-05   .4420789E-04  -.8413273E-05  -.1285181E-03
  -.3994741E-04   .9463730E-04   .7102843E-04  -.6630566E-05  -.3298953E-04
  -.3921035E-04   .4789497E-05  -.5732500E-04  -.1132198E-03  -.5514202E-04
  -.4360553E-04  -.6748662E-04  -.5844095E-04  -.2522441E-04  -.3884289E-04
  -.3422688E-05   .1211207E-04  -.3152573E-04  -.3578423E-04  -.1682489E-04
   .2839050E-04   .2640726E-04  -.9671912E-05  -.9706020E-05  -.3965995E-04
  -.5690621E-04  -.1468308E-04  -.5975312E-04  -.8928114E-04  -.2938764E-04
   .2967874E-04   .2202293E-04   .1504042E-04   .2672967E-04   .2321794E-04
   .5709409E-04   .1038662E-03   .1067603E-03   .4241598E-04  -.1913849E-04
   .3634403E-04   .6192085E-04   .3208127E-04   .1451714E-04   .7040320E-05
   .7957418E-06  -.2456862E-04  -.2492816E-04  -.3333021E-04  -.4937423E-04
  -.5096123E-04  -.3324921E-05   .4817727E-04   .3570069E-04  -.3517079E-04
  -.5834972E-04  -.2787836E-04  -.1705400E-05   .2200809E-04   .4307534E-04
   .1214015E-04  -.1065984E-03  -.1393369E-03  -.6294489E-04  -.1086778E-04
   .3936447E-04   .4910949E-04  -.3155909E-04  -.8259246E-04  -.1597654E-04
   .5043391E-04   .1903893E-04  -.2945478E-04  -.3494147E-04   .1611570E-04
   .1227043E-03   .1258012E-03   .4502218E-04   .2351906E-04   .7592387E-04
   .1237535E-03   .1411883E-03   .1136144E-03   .6305557E-04   .6772002E-04
   .7395279E-04   .1208487E-04   .1145076E-04   .6131115E-04   .9481261E-04
   .9305527E-04   .6486420E-04   .5476305E-04  -.1390014E-05  -.7660864E-04
  -.1649819E-04   .6096104E-04   .1355159E-04  -.6242022E-04  -.1961492E-04
   .7970302E-04   .5001965E-04  -.9443748E-04  -.8475811E-04   .3437813E-04
   .7417140E-04   .2418267E-04  -.4221218E-04  -.1768109E-04   .1564215E-04
  -.4320300E-04  -.5058584E-04  -.1850435E-04  -.4021415E-04  -.3489011E-04
   .3393366E-04   .3799683E-04  -.3701934E-04  -.9076570E-04   .1932121E-05
   .1075958E-03   .9561703E-04   .5995445E-04   .2966783E-04  -.2661715E-04
  -.1560985E-04   .9241390E-05  -.3515460E-04  -.2490817E-04  -.7808639E-05
   .6746536E-05   .2511138E-04   .1096743E-04   .2132784E-04   .5836205E-04
   .2975457E-04  -.2107767E-04   .8362551E-05   .7394083E-04   .8385899E-04
   .5855654E-04   .3329042E-04   .7482257E-04   .5158571E-04  -.8618646E-04
  -.8354552E-04   .2175582E-04   .3942381E-04   .6415993E-05  -.1819364E-04
  -.1812062E-04   .1367980E-04   .5071736E-04   .6563832E-04   .4336766E-04
   .7263822E-04   .5455052E-04  -.5290773E-04  -.7337688E-04  -.4238308E-04
  -.3149077E-04  -.1875099E-04  -.2369117E-05  -.2204100E-04  -.1937754E-04
   .8423852E-05   .6365380E-04   .7203094E-04  -.4858159E-04  -.1162689E-03
  -.3564136E-04   .1979064E-04   .7039058E-05   .3426506E-04   .6115947E-04
   .3870958E-04  -.4296222E-05   .1377318E-04   .5224271E-04   .1467040E-04
   .1575485E-04   .2555804E-04  -.5664234E-04  -.6957372E-04   .2566155E-04
   .5410325E-04   .3829018E-05  -.3595982E-04   .1280870E-06   .1822848E-05
   .1424588E-04   .9907944E-04   .1293052E-03   .5765461E-04  -.1696801E-04
  -.2267597E-05   .1504913E-04  -.5867721E-04  -.7832009E-04   .2568449E-05
   .5793954E-04   .3869568E-04  -.1361716E-04  -.2932369E-04   .3009963E-05
  -.1284540E-04  -.8097928E-04  -.6236780E-04  -.5170812E-04  -.8006879E-04
  -.3565143E-04  -.3753325E-04  -.5086399E-04  -.2238629E-04  -.5688623E-04
  -.5222805E-04  -.3767419E-05  -.7974883E-04  -.8407934E-04   .2337248E-04
   .5425081E-04  -.1112550E-04   .6542219E-05   .3403528E-04  -.3938864E-04
  -.6213256E-04  -.4445079E-04  -.2221041E-04  -.4909590E-06  -.1968960E-04
  -.8436517E-05   .3617562E-04   .3508766E-04  -.4083941E-04  -.9989411E-04
  -.9761896E-04  -.6223927E-04   .3120473E-05   .4965807E-04   .4876498E-04
   .4426006E-04   .6698541E-04   .5848279E-04  -.1702158E-04  -.9340665E-04
  -.4955384E-04  -.1460484E-05  -.1075096E-04   .4885002E-04   .8959487E-04
   .5503662E-04   .3252154E-04   .7197786E-04   .9201257E-04   .5092250E-04
   .7515174E-04   .1117681E-03   .6671176E-04  -.2383665E-04  -.6659081E-04
  -.2317354E-04   .3291576E-04   .9837015E-04   .1114807E-03   .6712071E-05
  -.9284537E-04  -.2167546E-04   .6717813E-04   .6051217E-05  -.8009903E-04
   .1859655E-05   .5797059E-04   .6406777E-05  -.7135966E-05   .3095094E-04
   .5763729E-04   .7167263E-04   .4848124E-04   .9952890E-05   .3491983E-04
   .6117671E-04   .4491350E-04   .3571274E-04   .6303020E-04   .5392671E-04
   .1223541E-04   .3115558E-04   .5898625E-04   .3617057E-04   .2899520E-05
   .3552916E-04   .4473614E-04  -.2154989E-04  -.2701897E-04   .2067300E-04
   .1032192E-04  -.1407184E-04   .4057534E-04   .9084247E-04   .1269225E-04
  -.9804385E-04  -.8417265E-04  -.4715569E-04   .2434332E-04   .8983431E-04
   .7415505E-04   .2193592E-05  -.8411958E-04  -.9438974E-04  -.6044357E-04
  -.5322353E-04  -.9659641E-04  -.1201358E-03  -.6013399E-04   .5048231E-04
   .4671292E-04   .2491331E-04   .2452866E-04  -.2796492E-04  -.4904361E-04
   .3349724E-05   .5866260E-04   .6180702E-04  -.2400278E-04  -.9520114E-04
  -.6490521E-04  -.9134515E-05   .5340226E-04   .1276809E-03   .6674729E-04
  -.5780657E-04  -.3298256E-04   .5529773E-04   .2187020E-04  -.2624922E-04
  -.2255555E-04  -.2711186E-04  -.4086103E-04   .2560839E-04   .9849877E-04
   .7607410E-04   .2662125E-04   .1972838E-04   .2887025E-04  -.1823480E-04
  -.8189832E-04   .8638034E-06   .1331877E-03   .9505961E-04  -.3799308E-04
  -.5355141E-04   .1956319E-05   .2370892E-04   .1127221E-04   .4625469E-04
   .8431527E-04   .1072617E-04  -.8850926E-04  -.2505357E-04   .5983916E-04
   .2986041E-04   .5920473E-05   .7049547E-04   .1339013E-03   .9114663E-04
   .1383599E-04  -.1982681E-04   .1693176E-04   .5423231E-04   .8847333E-05
   .1793914E-04   .7872196E-04   .7384926E-04   .2050977E-04  -.7271770E-05
   .3720467E-04   .4504512E-04  -.1718814E-04  -.5731203E-05  -.4650695E-05
  -.7402308E-04  -.5274218E-04   .2229316E-04   .3181062E-04   .4021568E-04
   .3888469E-04   .2127271E-04   .7305168E-04   .1130968E-03   .6493700E-04
   .2534846E-04   .3275049E-04  -.1279344E-04  -.5897135E-04  -.4608447E-04
  -.2546664E-04  -.1549121E-04  -.1728964E-04  -.7122222E-04  -.8300979E-04
  -.3705409E-04  -.1644133E-04  -.1618296E-04  -.2779168E-04  -.9421346E-04
  -.7379497E-04  -.1945422E-04  -.2304721E-04   .1489759E-04   .3937793E-04
  -.2645959E-04  -.6611003E-04  -.4988605E-04  -.4901484E-04  -.7391081E-04
  -.1297720E-03  -.9255739E-04  -.2931201E-05  -.2634309E-05  -.3538137E-04
  -.8995049E-04  -.8999243E-04   .2618611E-04   .1118879E-03   .7735482E-04
  -.2561726E-05  -.1032002E-03  -.1379658E-03  -.5594818E-04  -.1656105E-04
  -.1890465E-04   .4296921E-04   .9983845E-04   .7262547E-04   .2508308E-04
   .2287124E-04   .1127483E-04  -.5060737E-04   .3235814E-05   .1302493E-03
   .1439704E-03   .3088022E-04  -.8838502E-04  -.5389350E-04   .2512222E-04
  -.1297376E-04  -.4304873E-04   .1251879E-04   .9645027E-05   .2483210E-05
   .5349824E-04   .6192508E-04  -.1959141E-05  -.2794080E-04   .3581254E-04
   .7084528E-04   .4341032E-04   .2142456E-04   .3605740E-04   .6136919E-04
   .1154292E-04  -.5889062E-04  -.4597157E-04  -.2567802E-04   .7720087E-05
   .5607601E-04   .2624356E-04  -.2384448E-04  -.2148584E-04  -.3353131E-04
  -.5648619E-04  -.6771497E-04  -.5700749E-04  -.6586185E-04  -.5587340E-04
   .6727039E-04   .1627868E-03   .8560957E-04  -.5059054E-04  -.3308179E-04
   .5188493E-04   .2813025E-04   .4490306E-05   .1014778E-04   .1919300E-04
   .4946785E-04   .9130241E-04   .5327341E-04   .5055749E-05   .1221050E-05
  -.5985956E-04  -.1429735E-03  -.8453399E-04   .1330568E-04   .2294547E-04
  -.3313819E-04  -.3241305E-04  -.2613591E-06   .4054783E-04   .9183700E-04
   .3779447E-04  -.6476396E-04  -.1024701E-03  -.1088685E-03  -.1787995E-04
   .6605722E-04   .5832209E-04   .1634034E-04  -.1372752E-06   .4102640E-04
   .5575702E-04  -.9157087E-05  -.5820880E-04   .8037205E-05   .8504639E-04
   .1400143E-03   .1730124E-03   .9488063E-04  -.4071821E-05   .6761735E-05
   .1947600E-04  -.2027253E-04  -.2747454E-04   .4627492E-04   .8448937E-04
  -.8107733E-05  -.6312652E-04  -.4194177E-04  -.7201387E-04  -.2042832E-04
   .9161575E-04   .1235412E-03   .8002911E-04  -.1806955E-04  -.1003542E-03
  -.5983839E-04   .1257600E-05  -.2020127E-04  -.6012792E-04  -.4913783E-04
  -.4930080E-04   .1142377E-05   .5668734E-04   .3216929E-04  -.4639568E-04
  -.7671171E-04  -.7442512E-04  -.7667599E-04  -.3556290E-04   .3133000E-04
   .6290080E-05  -.5152627E-05   .2758487E-04  -.3420742E-04  -.7302495E-04
  -.2177351E-04  -.3717611E-04  -.1023465E-03  -.6074289E-04   .2293669E-05
  -.6746425E-05  -.2634114E-04   .5049598E-05   .3379180E-04   .2223402E-05
  -.2649532E-04  -.1281199E-04  -.3128461E-04  -.4849837E-04  -.5184739E-04
  -.7849607E-04  -.2602603E-04   .5388171E-04   .2465075E-04   .1535050E-04
   .4404290E-04   .5821300E-04   .4831599E-04  -.7036859E-06   .4777324E-05
   .2191934E-04   .2176468E-04   .4579563E-04   .9282657E-04   .2325129E-04
  -.1317396E-03  -.1122709E-03   .3621294E-04   .5849133E-04  -.2560685E-04
  -.2786992E-04   .4853626E-04   .1422647E-04  -.2066837E-04  -.3408975E-04
  -.4084693E-04  -.3158815E-04  -.2417932E-04  -.1686470E-04   .5641938E-05
  -.2455868E-05  -.6417306E-06   .6195027E-04   .6858885E-04   .4066388E-04
   .1886948E-04   .4318370E-04   .5700856E-04   .5018370E-04   .1759525E-04
  -.1062844E-03  -.8740419E-04   .4150582E-04   .2485817E-04  -.5319968E-04
  -.6979093E-04  -.1118829E-03  -.1575173E-03  -.6727109E-04   .6038130E-04
   .9039148E-04   .2528767E-04  -.2088721E-05   .2152927E-05  -.4380790E-04
  -.6014657E-05   .2208907E-04  -.6278930E-04  -.7523686E-04  -.9299662E-04
  -.1188803E-03  -.8454399E-04   .3167929E-05   .3734552E-04  -.1722344E-04
  -.3036586E-04  -.6401505E-07   .1915238E-04   .7596003E-05   .1121678E-04
   .4422026E-04   .5224662E-04  -.5053833E-04  -.1082208E-03  -.5837833E-04
  -.7752326E-04  -.8002641E-04   .4156272E-05   .4407885E-04  -.2256157E-04
  -.5463361E-04  -.1864309E-05   .6323640E-05  -.3414468E-04   .2820512E-04
   .1243889E-03   .5184646E-04  -.9308207E-04  -.5636917E-04   .6941173E-04
   .5642106E-04  -.2141150E-04  -.4910891E-06   .6736299E-04   .3947585E-04
  -.3780558E-04  -.8417511E-04  -.8163557E-04  -.3491837E-04   .3399534E-04
   .7407631E-04   .3502556E-04   .1643954E-04   .5142365E-04   .5544568E-04
   .9671837E-04   .1433623E-03   .8797910E-04  -.3186855E-04  -.1060961E-03
  -.4854730E-04   .1255955E-05  -.2260651E-04   .5930678E-05   .3685815E-05
  -.6880026E-04  -.6459852E-04  -.3522293E-04  -.3034691E-04  -.2731830E-04
  -.2371639E-04  -.5196167E-05   .4218117E-04   .2819675E-04  -.6140096E-05
   .3325415E-04   .6970401E-04   .2412509E-04  -.6776367E-04  -.4821910E-04
   .5630037E-04   .1116613E-03   .2538996E-04  -.6860395E-05   .5917200E-04
   .2352981E-05  -.8273059E-04  -.7705870E-04   .1104770E-04   .7828464E-04
   .4171624E-04  -.1923452E-05  -.3216879E-04  -.8646856E-04  -.6857502E-04
  -.1222964E-05  -.1310257E-04  -.4805275E-04  -.2028332E-04   .4793038E-04
   .3471602E-04  -.7828219E-05   .3182419E-04   .6117194E-04   .9449580E-05
  -.2906173E-04  -.3736944E-05   .2405045E-04   .3848168E-04  -.2049259E-04
  -.8374103E-04  -.7109764E-04  -.4001856E-04   .4134493E-05   .4267342E-04
   .3883866E-04   .5078492E-05   .6108558E-06  -.3536365E-05  -.3358642E-05
   .4406315E-04   .7660025E-04   .7864258E-04   .3928333E-04  -.4753798E-04
  -.8558361E-04  -.1449243E-04   .3820162E-04  -.1809054E-04  -.6785111E-04
  -.7743229E-04  -.6216271E-04  -.1193686E-04   .2485581E-04   .4127376E-04
  -.2717389E-04  -.1161422E-03  -.8014371E-04   .2616936E-04   .5749547E-04
   .1271953E-04  -.5502047E-05   .4516425E-05  -.4791565E-06  -.6505940E-04
  -.6004931E-04   .4359636E-04   .8832340E-04   .3309282E-04  -.4828593E-04
  -.5980169E-04  -.2201315E-04  -.2657837E-04  -.7671622E-04  -.2998371E-04
   .7741678E-04   .8064054E-04   .1651089E-04   .2837170E-04   .7233470E-04
   .7728325E-04   .1925516E-04  -.4161990E-04  -.5986109E-04   .4558995E-05
   .6444747E-04   .2261622E-04   .7627612E-05   .1171967E-04  -.1296223E-04
  -.2145431E-04   .2057680E-04   .9760552E-04   .1045200E-03  -.4079860E-04
  -.6951327E-04   .4581715E-04   .6503697E-04   .3034419E-04   .3357904E-04
   .2995011E-05  -.2390021E-04  -.3516119E-04  -.1856316E-04  -.3222538E-04
  -.3360577E-04  -.1462229E-04  -.5333928E-04  -.1056652E-03  -.1525671E-03
  -.8155996E-04   .9849388E-05   .4943138E-05  -.1043189E-04   .2504257E-04
   .1501802E-05  -.3527987E-04   .1225444E-04   .7475354E-04   .4664022E-04
   .3650360E-05  -.2250393E-04  -.3522928E-04   .1684533E-04   .3036684E-04
  -.4013050E-05  -.3552289E-05   .9069616E-05   .2463958E-04   .3981675E-04
   .5116267E-04   .8073072E-04   .8137482E-04  -.2406844E-04  -.1178373E-03
  -.5685967E-04   .1521063E-04   .9479078E-05   .1015119E-05   .3816271E-05
   .3023419E-04   .8144924E-04   .1111924E-03   .8961852E-04   .2310186E-04
  -.3353731E-05  -.1685408E-04  -.4074005E-04  -.3706209E-04  -.5400188E-04
  -.3402675E-04   .6453605E-05   .2227886E-04   .8786031E-06  -.2713031E-04
  -.1922213E-04   .2800893E-05  -.1621247E-04  -.2379616E-04  -.3661056E-04
  -.3250912E-04   .2245450E-04   .9960338E-04   .1231657E-03   .7404084E-05
  -.9574483E-04  -.8776442E-04  -.5016235E-04   .4844643E-04   .8611623E-04
   .3149524E-04   .2207539E-04   .1780620E-04  -.7185081E-05   .2424366E-04
   .1148125E-03   .1174043E-03  -.8054212E-05  -.6500238E-04  -.7721754E-05
   .5188222E-04   .1230811E-03   .1010241E-03   .1729751E-04   .6398419E-05
  -.1240393E-04  -.3251784E-04  -.2594702E-05   .5406051E-05  -.2189398E-05
   .4066301E-04   .6702325E-04   .5434074E-04   .6939230E-04   .9140827E-04
   .5781589E-04  -.9927201E-05  -.4805886E-04  -.5526634E-04   .1148107E-04
   .1231320E-03   .1996853E-03   .2370275E-03   .2997262E-03   .4662205E-03
   .5466239E-03   .5570835E-03   .5624850E-03   .5635319E-03   .4744608E-03
   .3871452E-03   .4786882E-03   .7419934E-03   .1046546E-02   .1472112E-02
   .1984118E-02   .2256192E-02   .2350394E-02   .2426099E-02   .2293428E-02
   .1827899E-02   .1114144E-02   .2545107E-03  -.8164163E-03  -.2090748E-02
  -.3264408E-02  -.4034184E-02  -.4237365E-02  -.3771201E-02  -.2732498E-02
  -.1346753E-02   .7939882E-04   .1262560E-02   .2027562E-02   .2418264E-02
   .2379747E-02   .1906503E-02   .1231338E-02   .6489519E-03   .2882384E-03
   .2612879E-03   .5517249E-03   .9009488E-03   .1092980E-02   .9529863E-03
   .3734137E-03  -.4970869E-03  -.1380504E-02  -.1999527E-02  -.2006413E-02
  -.1272727E-02  -.2028007E-03   .6489843E-03   .1190005E-02   .1604536E-02
   .2028529E-02   .2387263E-02   .2188202E-02   .1115185E-02  -.4304274E-03
  -.1849532E-02  -.2876672E-02  -.3688198E-02  -.4537996E-02  -.5451254E-02
  -.6092848E-02  -.6050326E-02  -.5170554E-02  -.3825910E-02  -.2637166E-02
  -.2002319E-02  -.1969132E-02  -.2308799E-02  -.2597935E-02  -.2509938E-02
  -.1876995E-02  -.8536425E-03  -.8124766E-05   .1267971E-03  -.4547660E-03
  -.1149723E-02  -.1164200E-02  -.2456079E-03   .1215882E-02   .2746653E-02
   .3818167E-02   .4032358E-02   .3454686E-02   .2451761E-02   .1419167E-02
   .5039369E-03  -.1251215E-03  -.1811751E-03   .3410826E-04  -.2637672E-04
  -.2589802E-03  -.9297829E-04   .9602057E-03   .2747891E-02   .4479571E-02
   .5237523E-02   .4696276E-02   .3331890E-02   .1960680E-02   .1186667E-02
   .1158432E-02   .1582643E-02   .2141521E-02   .2849697E-02   .3700904E-02
   .4660570E-02   .5567282E-02   .6224348E-02   .6422559E-02   .5934165E-02
   .4866840E-02   .3468198E-02   .1992210E-02   .6925392E-03  -.5132192E-03
  -.1735521E-02  -.2978722E-02  -.4353104E-02  -.5793572E-02  -.6920776E-02
  -.7349124E-02  -.7124983E-02  -.6753800E-02  -.6745896E-02  -.7105982E-02
  -.7474224E-02  -.7461173E-02  -.6685482E-02  -.4896801E-02  -.2494250E-02
  -.2852555E-03   .1237886E-02   .2040378E-02   .2421088E-02   .2655759E-02
   .2819912E-02   .2667096E-02   .2009496E-02   .9354299E-03  -.2768811E-03
  -.1219283E-02  -.1559006E-02  -.1296392E-02  -.5353328E-03   .5804598E-03
   .1850412E-02   .2818734E-02   .2917325E-02   .2121616E-02   .8598940E-03
  -.2368225E-03  -.8100266E-03  -.1054620E-02  -.1272591E-02  -.1608960E-02
  -.1945000E-02  -.2003020E-02  -.1488029E-02  -.3672848E-03   .9918966E-03
   .2193208E-02   .3152816E-02   .4076811E-02   .4978425E-02   .5484698E-02
   .5323223E-02   .4603078E-02   .3841304E-02   .3397490E-02   .2915340E-02
   .2100050E-02   .1275185E-02   .1040051E-02   .1633241E-02   .2743992E-02
   .3708632E-02   .3921780E-02   .3305338E-02   .2250964E-02   .1142545E-02
   .8472672E-04  -.1166961E-02  -.2774588E-02  -.4312980E-02  -.5149548E-02
  -.5084284E-02  -.4351105E-02  -.3435621E-02  -.2822652E-02  -.2808451E-02
  -.3519376E-02  -.5013837E-02  -.7070529E-02  -.9114239E-02  -.1050253E-01
  -.1080768E-01  -.9812065E-02  -.7409459E-02  -.4055168E-02  -.7649336E-03
   .1740537E-02   .3280479E-02   .3928311E-02   .3854987E-02   .3107300E-02
   .1863271E-02   .6332537E-03  -.2703674E-03  -.7861625E-03  -.7945297E-03
  -.1056369E-03   .1309071E-02   .2998999E-02   .4233687E-02   .4513035E-02
   .3895710E-02   .2796973E-02   .1630014E-02   .5573953E-03  -.5838127E-03
  -.1898997E-02  -.2968914E-02  -.3325853E-02  -.2772793E-02  -.1474246E-02
   .6357159E-04   .1320117E-02   .2186430E-02   .2753693E-02   .2875748E-02
   .2225018E-02   .9609251E-03  -.1718627E-03  -.6368201E-03  -.3608801E-03
   .4671197E-03   .1378738E-02   .1873108E-02   .2096666E-02   .2558998E-02
   .3480892E-02   .4666539E-02   .5535216E-02   .5761881E-02   .5467020E-02
   .4761585E-02   .3786213E-02   .2812645E-02   .2113175E-02   .1835769E-02
   .1881728E-02   .1944213E-02   .1786911E-02   .1621074E-02   .1737677E-02
   .2086367E-02   .2480073E-02   .2461094E-02   .1659161E-02   .3686515E-03
  -.8832844E-03  -.1843993E-02  -.2521180E-02  -.2978639E-02  -.3362616E-02
  -.3731149E-02  -.3932356E-02  -.3706777E-02  -.3111216E-02  -.2578203E-02
  -.2412807E-02  -.2552799E-02  -.2916279E-02  -.3457962E-02  -.3976926E-02
  -.4274742E-02  -.4317546E-02  -.4062152E-02  -.3439047E-02  -.2355867E-02
  -.8062512E-03   .6960859E-03   .1419160E-02   .1250455E-02   .6096367E-03
  -.8571822E-04  -.8338165E-03  -.1783556E-02  -.2932760E-02  -.4169087E-02
  -.5145999E-02  -.5479952E-02  -.5328485E-02  -.4795515E-02  -.3934529E-02
  -.2834328E-02  -.1606815E-02  -.4473091E-03   .6073783E-03   .1651000E-02
   .2711200E-02   .3497213E-02   .3676266E-02   .3437945E-02   .3191468E-02
   .2833366E-02   .2080067E-02   .1314998E-02   .1354176E-02   .2459793E-02
   .3944199E-02   .5108380E-02   .5856432E-02   .6338979E-02   .6613429E-02
   .6802775E-02   .6964430E-02   .7033901E-02   .6889861E-02   .6338612E-02
   .5411553E-02   .4463981E-02   .3817545E-02   .3286088E-02   .2672125E-02
   .2152488E-02   .1818993E-02   .1415224E-02   .6387538E-03  -.4469718E-03
  -.1557585E-02  -.2562243E-02  -.3602134E-02  -.4574307E-02  -.4948384E-02
  -.4273981E-02  -.2800292E-02  -.1167953E-02   .1442966E-03   .1038816E-02
   .1469944E-02   .1177772E-02   .1369502E-03  -.1286566E-02  -.2792434E-02
  -.4146148E-02  -.4997808E-02  -.5347186E-02  -.5498816E-02  -.5670198E-02
  -.5896345E-02  -.6095048E-02  -.5954944E-02  -.5191055E-02  -.3631504E-02
  -.1513452E-02   .5149897E-03   .1618999E-02   .1479924E-02   .6405898E-03
  -.7544070E-04  -.4779802E-03  -.9140651E-03  -.1242384E-02  -.1149568E-02
  -.6330590E-03  -.2126565E-03  -.4653549E-03  -.1451075E-02  -.2882370E-02
  -.4387048E-02  -.5575593E-02  -.6098811E-02  -.5818436E-02  -.5036046E-02
  -.4042666E-02  -.2838072E-02  -.1410686E-02   .3067944E-03   .2213885E-02
   .4178727E-02   .6212939E-02   .8152874E-02   .9475694E-02   .9718747E-02
   .9033188E-02   .8309994E-02   .8349377E-02   .8935473E-02   .9318635E-02
   .9185102E-02   .8722522E-02   .8008585E-02   .6705829E-02   .4687990E-02
   .2510503E-02   .9302290E-03   .1301713E-03  -.4291821E-03  -.1382444E-02
  -.2927221E-02  -.4835248E-02  -.6866739E-02  -.8734525E-02  -.1007590E-01
  -.1085960E-01  -.1127727E-01  -.1120601E-01  -.1040639E-01  -.8833058E-02
  -.6780072E-02  -.4704313E-02  -.3077684E-02  -.2401894E-02  -.2686131E-02
  -.3210985E-02  -.3158389E-02  -.2322046E-02  -.1284532E-02  -.6876667E-03
  -.6250975E-03  -.7775739E-03  -.5366337E-03   .3106451E-03   .1379248E-02
   .2094750E-02   .1909404E-02   .9655505E-03   .9674485E-04   .7952478E-04
   .9504391E-03   .1758841E-02   .1585744E-02   .6885140E-03   .5196237E-04
   .3079590E-03   .1478561E-02   .3060978E-02   .4161739E-02   .4085066E-02
   .3000008E-02   .1879088E-02   .1583399E-02   .2309643E-02   .3937781E-02
   .5815909E-02   .7078145E-02   .7225153E-02   .6398202E-02   .5437888E-02
   .5137449E-02   .5577032E-02   .6630118E-02   .8219246E-02   .9838751E-02
   .1053929E-01   .9543280E-02   .7158110E-02   .4340991E-02   .2126960E-02
   .1171870E-02   .1044514E-02   .7297402E-03  -.6195674E-03  -.3134564E-02
  -.5991053E-02  -.8173935E-02  -.9307320E-02  -.9661863E-02  -.9666206E-02
  -.9584948E-02  -.9731073E-02  -.1012351E-01  -.1035371E-01  -.1004305E-01
  -.8972922E-02  -.7088727E-02  -.4481727E-02  -.1834656E-02  -.3137654E-03
  -.5508226E-03  -.2063536E-02  -.3868625E-02  -.5429810E-02  -.6640784E-02
  -.7363978E-02  -.7361641E-02  -.6495086E-02  -.5019499E-02  -.3193752E-02
  -.1198430E-02   .4800000E-03   .1261319E-02   .7755605E-03  -.8555651E-03
  -.3031190E-02  -.4884172E-02  -.5560685E-02  -.4582923E-02  -.1990482E-02
   .1394111E-02   .4536907E-02   .6778851E-02   .7836536E-02   .7969152E-02
   .7334348E-02   .6241801E-02   .5527779E-02   .5872116E-02   .7215404E-02
   .8959822E-02   .1040205E-01   .1112284E-01   .1123240E-01   .1097174E-01
   .1014357E-01   .8315221E-02   .5569095E-02   .2634770E-02   .2820388E-03
  -.1081566E-02  -.1434400E-02  -.1208258E-02  -.1209408E-02  -.2032694E-02
  -.3779293E-02  -.6148989E-02  -.8593198E-02  -.1050418E-01  -.1133692E-01
  -.1063878E-01  -.8278124E-02  -.4775866E-02  -.1039276E-02   .2118802E-02
   .4045679E-02   .4493969E-02   .4006041E-02   .3121078E-02   .2051248E-02
   .1198891E-02   .1278631E-02   .2726068E-02   .5380106E-02   .8577428E-02
   .1125633E-01   .1231890E-01   .1131403E-01   .8800830E-02   .5883866E-02
   .3487167E-02   .1919990E-02   .6961740E-03  -.7617522E-03  -.1801016E-02
  -.1244777E-02   .1128007E-02   .4202187E-02   .5951006E-02   .4944052E-02
   .1513048E-02  -.2698203E-02  -.6303602E-02  -.8854398E-02  -.1042371E-01
  -.1110168E-01  -.1061908E-01  -.8707745E-02  -.5707402E-02  -.2543160E-02
  -.1615732E-03   .8896293E-03   .6335190E-03  -.2518420E-03  -.8997480E-03
  -.8969604E-03  -.5016275E-03  -.3508619E-03  -.6378042E-03  -.1045173E-02
  -.1216540E-02  -.1261870E-02  -.1550751E-02  -.2173461E-02  -.2841844E-02
  -.3508741E-02  -.4387935E-02  -.5639032E-02  -.7353895E-02  -.9378701E-02
  -.1139683E-01  -.1301134E-01  -.1377338E-01  -.1358993E-01  -.1294973E-01
  -.1218914E-01  -.1089405E-01  -.8378258E-02  -.4643386E-02  -.6511252E-03
   .2435466E-02   .4218902E-02   .5093297E-02   .5443022E-02   .5232884E-02
   .4672575E-02   .4245817E-02   .4537192E-02   .6009123E-02   .8372246E-02
   .1067603E-01   .1201798E-01   .1210931E-01   .1146089E-01   .1063262E-01
   .9741377E-02   .8572633E-02   .7000721E-02   .4917849E-02   .2221701E-02
  -.9804586E-03  -.4185528E-02  -.6764318E-02  -.8452957E-02  -.9528479E-02
  -.1050622E-01  -.1160115E-01  -.1290742E-01  -.1422790E-01  -.1487951E-01
  -.1418562E-01  -.1213299E-01  -.9374258E-02  -.6979249E-02  -.5521335E-02
  -.4620076E-02  -.3528761E-02  -.1931293E-02  -.5845342E-04   .1608377E-02
   .2547248E-02   .2687466E-02   .2733162E-02   .3739329E-02   .5875582E-02
   .8406523E-02   .1036065E-01   .1120683E-01   .1095116E-01   .9684569E-02
   .7663102E-02   .5252085E-02   .3231202E-02   .2582464E-02   .3379955E-02
   .4720122E-02   .5576985E-02   .5342236E-02   .4184286E-02   .2734874E-02
   .1685351E-02   .1337676E-02   .1400881E-02   .1539412E-02   .1549413E-02
   .1445425E-02   .1528983E-02   .1761747E-02   .1829347E-02   .1645512E-02
   .1767683E-02   .2668100E-02   .3622966E-02   .3057720E-02   .1246639E-03
  -.4209346E-02  -.7963682E-02  -.1008337E-01  -.1134669E-01  -.1284990E-01
  -.1435716E-01  -.1494379E-01  -.1426374E-01  -.1255261E-01  -.1034749E-01
  -.8186517E-02  -.6611804E-02  -.6260488E-02  -.7007340E-02  -.8096777E-02
  -.8887380E-02  -.9169522E-02  -.9173307E-02  -.8865673E-02  -.7619493E-02
  -.5182707E-02  -.2071465E-02   .1155912E-02   .4185591E-02   .6995044E-02
   .9574263E-02   .1144662E-01   .1179580E-01   .1040404E-01   .8064928E-02
   .6115115E-02   .5553403E-02   .6300846E-02   .7443354E-02   .8223057E-02
   .8567179E-02   .8710829E-02   .8749696E-02   .8454244E-02   .7394317E-02
   .5214010E-02   .2073562E-02  -.1043865E-02  -.2800852E-02  -.2648048E-02
  -.1502650E-02  -.7326361E-03  -.5917802E-03  -.1252278E-03   .1536504E-02
   .4209851E-02   .7164260E-02   .9645363E-02   .1066073E-01   .9543551E-02
   .6910822E-02   .4440457E-02   .3312406E-02   .3173195E-02   .3383799E-02
   .3721400E-02   .3907722E-02   .3548541E-02   .2552804E-02   .1415501E-02
   .6439294E-03   .9859664E-04  -.1022980E-02  -.3148028E-02  -.5746490E-02
  -.8019546E-02  -.9552974E-02  -.1028886E-01  -.1024481E-01  -.9242895E-02
  -.7134141E-02  -.4269244E-02  -.1317662E-02   .8566582E-03   .1677336E-02
   .1215616E-02   .4566141E-04  -.1178347E-02  -.2043158E-02  -.2284897E-02
  -.1709857E-02  -.6971294E-03  -.4456311E-04  -.1135785E-03  -.8798264E-03
  -.2160436E-02  -.3506122E-02  -.4221716E-02  -.3870359E-02  -.2861197E-02
  -.2260988E-02  -.2277937E-02  -.2006125E-02  -.6573619E-03   .1693111E-02
   .4456854E-02   .7224556E-02   .9747853E-02   .1164911E-01   .1272644E-01
   .1326413E-01   .1375796E-01   .1441572E-01   .1542452E-01   .1677161E-01
   .1788251E-01   .1786048E-01   .1609179E-01   .1309326E-01   .1019214E-01
   .8253592E-02   .7379985E-02   .7217150E-02   .7093826E-02   .6495273E-02
   .5214355E-02   .3236198E-02   .7927293E-03  -.1655190E-02  -.3788506E-02
  -.5927714E-02  -.8384540E-02  -.1086262E-01  -.1263731E-01  -.1310128E-01
  -.1228906E-01  -.1077764E-01  -.9138645E-02  -.7624017E-02  -.6175715E-02
  -.4851515E-02  -.3848831E-02  -.3178381E-02  -.2768951E-02  -.2348670E-02
  -.1376166E-02   .2087116E-03   .1417551E-02   .1330885E-02   .2135048E-03
  -.5794921E-03   .2319512E-03   .2137934E-02   .3630340E-02   .4317956E-02
   .5016842E-02   .5986955E-02   .6416163E-02   .5445643E-02   .3123380E-02
   .4540505E-03  -.1635477E-02  -.2734893E-02  -.2765862E-02  -.2075520E-02
  -.1258757E-02  -.1133511E-02  -.2203628E-02  -.4152428E-02  -.6401243E-02
  -.8590421E-02  -.1080430E-01  -.1297983E-01  -.1430484E-01  -.1382141E-01
  -.1133905E-01  -.7677600E-02  -.3952175E-02  -.9818981E-03   .1035839E-02
   .2489883E-02   .3870832E-02   .5423440E-02   .7115520E-02   .8772810E-02
   .9959121E-02   .1037919E-01   .1026492E-01   .1021141E-01   .1055749E-01
   .1101109E-01   .1097891E-01   .1034747E-01   .9607677E-02   .9149670E-02
   .8764774E-02   .7622227E-02   .5175915E-02   .1728403E-02  -.2373310E-02
  -.6967157E-02  -.1163765E-01  -.1546501E-01  -.1733826E-01  -.1682246E-01
  -.1473794E-01  -.1264433E-01  -.1184566E-01  -.1240379E-01  -.1337012E-01
  -.1374763E-01  -.1321880E-01  -.1227496E-01  -.1141707E-01  -.1047701E-01
  -.8827560E-02  -.6215904E-02  -.2946552E-02   .8842439E-04   .1960338E-02
   .2675776E-02   .2870145E-02   .3031374E-02   .3341427E-02   .3693789E-02
   .3840127E-02   .3647242E-02   .3261064E-02   .2592313E-02   .1523196E-02
   .4113183E-03   .7963103E-04   .9018257E-03   .2340349E-02   .3337203E-02
   .3303494E-02   .2524472E-02   .1923882E-02   .2491275E-02   .4678153E-02
   .7671484E-02   .9703738E-02   .1009448E-01   .9917893E-02   .1067649E-01
   .1292784E-01   .1601172E-01   .1857755E-01   .1947042E-01   .1799823E-01
   .1459593E-01   .1097838E-01   .8460859E-02   .6992716E-02   .5813036E-02
   .4863307E-02   .4727549E-02   .5279002E-02   .5279399E-02   .3787288E-02
   .1415474E-02  -.4170120E-03  -.1127805E-02  -.1383516E-02  -.2387614E-02
  -.4746956E-02  -.8027986E-02  -.1129058E-01  -.1367666E-01  -.1479874E-01
  -.1485909E-01  -.1421590E-01  -.1310724E-01  -.1159840E-01  -.1008353E-01
  -.9367633E-02  -.9927306E-02  -.1121364E-01  -.1200764E-01  -.1144202E-01
  -.9419001E-02  -.6452244E-02  -.3543736E-02  -.1654499E-02  -.9203523E-03
  -.7109175E-03  -.4454137E-03  -.3242140E-03  -.5178757E-03  -.2550424E-03
   .9846235E-03   .2700882E-02   .4106988E-02   .4953171E-02   .5774885E-02
   .7088511E-02   .8728118E-02   .1032595E-01   .1203036E-01   .1378752E-01
   .1480177E-01   .1437262E-01   .1294269E-01   .1190329E-01   .1219396E-01
   .1356958E-01   .1518173E-01   .1671585E-01   .1828499E-01   .1926293E-01
   .1844004E-01   .1549519E-01   .1183238E-01   .9239020E-02   .8127386E-02
   .7513029E-02   .6654354E-02   .5626639E-02   .4622422E-02   .3455312E-02
   .1859629E-02  -.1427427E-03  -.2597152E-02  -.5607138E-02  -.8645164E-02
  -.1041221E-01  -.1003336E-01  -.8438308E-02  -.7645736E-02  -.8536903E-02
  -.9968670E-02  -.1032887E-01  -.9232308E-02  -.7263677E-02  -.4799102E-02
  -.2183387E-02   .4806523E-04   .1497261E-02   .2105700E-02   .1968937E-02
   .1212889E-02  -.2553557E-04  -.1602880E-02  -.2996145E-02  -.3430620E-02
  -.2680529E-02  -.1190277E-02   .2168822E-03   .1303519E-02   .2382132E-02
   .3532371E-02   .4545694E-02   .4993419E-02   .4643599E-02   .3503642E-02
   .1782503E-02   .8038048E-04  -.7002694E-03  -.3269857E-03   .5555621E-03
   .1299593E-02   .1571152E-02   .1036094E-02  -.5997334E-03  -.3208401E-02
  -.6407764E-02  -.9976470E-02  -.1359741E-01  -.1636643E-01  -.1744994E-01
  -.1683003E-01  -.1526037E-01  -.1373382E-01  -.1297484E-01  -.1336706E-01
  -.1487301E-01  -.1704087E-01  -.1920701E-01  -.2073426E-01  -.2108801E-01
  -.1957601E-01  -.1576084E-01  -.1066241E-01  -.6615992E-02  -.5452265E-02
  -.6474870E-02  -.7256583E-02  -.5959530E-02  -.2467598E-02   .2170150E-02
   .6855637E-02   .1053997E-01   .1253710E-01   .1271940E-01   .1158611E-01
   .9914200E-02   .8322982E-02   .7098351E-02   .6235850E-02   .5755879E-02
   .5753134E-02   .6353697E-02   .7650077E-02   .9743566E-02   .1234043E-01
   .1436374E-01   .1444428E-01   .1212742E-01   .8084500E-02   .3427511E-02
  -.7768094E-03  -.3727341E-02  -.4902259E-02  -.4415834E-02  -.3240421E-02
  -.2425529E-02  -.2423266E-02  -.2979630E-02  -.3643302E-02  -.4162700E-02
  -.4432011E-02  -.4284590E-02  -.3707291E-02  -.2628288E-02  -.6381246E-03
   .2535627E-02   .6310085E-02   .9273413E-02   .1006642E-01   .8342836E-02
   .5143176E-02   .2239712E-02   .5227758E-03  -.1443404E-03  -.1842560E-03
  -.3595663E-03  -.1605077E-02  -.4558678E-02  -.8865519E-02  -.1324480E-01
  -.1672484E-01  -.1953132E-01  -.2197331E-01  -.2308371E-01  -.2135091E-01
  -.1651111E-01  -.1062388E-01  -.6681804E-02  -.6092172E-02  -.7829472E-02
  -.9895375E-02  -.1114559E-01  -.1141452E-01  -.1080091E-01  -.8922009E-02
  -.4871598E-02   .1860106E-02   .1057848E-01   .1950534E-01   .2638672E-01
   .2942222E-01   .2815064E-01   .2378838E-01   .1867417E-01   .1478419E-01
   .1257809E-01   .1159056E-01   .1149627E-01   .1222532E-01   .1339396E-01
   .1443853E-01   .1477031E-01   .1367595E-01   .1074016E-01   .5792746E-02
  -.5572153E-03  -.6716645E-02  -.1110559E-01  -.1306754E-01  -.1284011E-01
  -.1146546E-01  -.1063243E-01  -.1163002E-01  -.1414470E-01  -.1688008E-01
  -.1845201E-01  -.1776596E-01  -.1439109E-01  -.9208518E-02  -.3820070E-02
   .7217248E-03   .4066535E-02   .6113261E-02   .7161001E-02   .7856262E-02
   .8726326E-02   .9893717E-02   .1120483E-01   .1251163E-01   .1408943E-01
   .1633028E-01   .1846220E-01   .1907981E-01   .1738378E-01   .1348538E-01
   .8131773E-02   .2559154E-02  -.1706784E-02  -.3488819E-02  -.2588045E-02
   .2267402E-03   .3543294E-02   .5975827E-02   .6857544E-02   .6258362E-02
   .4844055E-02   .3023019E-02   .1233897E-02  -.2208885E-03  -.1513189E-02
  -.2924680E-02  -.4380199E-02  -.5097160E-02  -.4746670E-02  -.4384293E-02
  -.5323259E-02  -.7566009E-02  -.9881879E-02  -.1146881E-01  -.1280903E-01
  -.1440235E-01  -.1609571E-01  -.1778870E-01  -.1967020E-01  -.2171438E-01
  -.2330307E-01  -.2344290E-01  -.2147050E-01  -.1771043E-01  -.1345723E-01
  -.9969793E-02  -.7906224E-02  -.7031424E-02  -.6181673E-02  -.4503455E-02
  -.2650717E-02  -.2130822E-02  -.3120732E-02  -.4001329E-02  -.3525298E-02
  -.2536057E-02  -.2629430E-02  -.3789709E-02  -.4591990E-02  -.4138691E-02
  -.2772333E-02  -.1076538E-02   .5041508E-03   .1592935E-02   .2250590E-02
   .3068376E-02   .4594588E-02   .6491436E-02   .7463955E-02   .6424957E-02
   .3769660E-02   .1243113E-02   .3512733E-03   .1247218E-02   .2840990E-02
   .4077461E-02   .4827188E-02   .5250547E-02   .5453766E-02   .5354220E-02
   .4770956E-02   .3829217E-02   .2905837E-02   .2167805E-02   .1599471E-02
   .8330522E-03  -.3893377E-03  -.1550536E-02  -.1721779E-02  -.4582300E-03
   .1724471E-02   .3234784E-02   .2340868E-02  -.1295299E-02  -.6136765E-02
  -.9667449E-02  -.1028136E-01  -.8199069E-02  -.4946133E-02  -.2230162E-02
  -.1255847E-02  -.1947858E-02  -.2887001E-02  -.2878558E-02  -.2260057E-02
  -.2417543E-02  -.3767634E-02  -.5365986E-02  -.6019998E-02  -.5313727E-02
  -.3666426E-02  -.1908567E-02  -.9682054E-03  -.1277007E-02  -.2190085E-02
  -.2338219E-02  -.9763887E-03   .1414693E-02   .3964521E-02   .6289940E-02
   .8484759E-02   .1025497E-01   .1025567E-01   .7331278E-02   .2182432E-02
  -.2754049E-02  -.5200191E-02  -.4715209E-02  -.2097926E-02   .1876332E-02
   .6282287E-02   .9375185E-02   .9829610E-02   .8027578E-02   .4946603E-02
   .1821755E-02   .1733632E-04   .3746045E-04   .1097427E-02   .2333028E-02
   .3998227E-02   .6663252E-02   .9864973E-02   .1233503E-01   .1322129E-01
   .1246706E-01   .1080454E-01   .9350717E-02   .8870291E-02   .9565418E-02
   .1122753E-01   .1361412E-01   .1652328E-01   .1924341E-01   .2069025E-01
   .2035858E-01   .1858996E-01   .1583659E-01   .1232511E-01   .8639500E-02
   .5901505E-02   .5007696E-02   .5798783E-02   .7363621E-02   .8982902E-02
   .9682268E-02   .8099644E-02   .4164563E-02  -.5122067E-03  -.3714708E-02
  -.4034860E-02  -.1906787E-02   .9394393E-03   .3089942E-02   .3940888E-02
   .3796689E-02   .3357097E-02   .3292526E-02   .3856453E-02   .4222506E-02
   .3285893E-02   .1123903E-02  -.7295933E-03  -.7643645E-03   .8398679E-03
   .3056163E-02   .5407684E-02   .7802256E-02   .9702963E-02   .1007462E-01
   .8162560E-02   .4203307E-02  -.8325569E-03  -.5808474E-02  -.9780535E-02
  -.1277815E-01  -.1571594E-01  -.1905918E-01  -.2233879E-01  -.2483334E-01
  -.2685271E-01  -.2984686E-01  -.3423646E-01  -.3871260E-01  -.4155887E-01
  -.4195513E-01  -.3999899E-01  -.3620965E-01  -.3181831E-01  -.2849465E-01
  -.2697774E-01  -.2628565E-01  -.2514675E-01  -.2349960E-01  -.2207792E-01
  -.2066828E-01  -.1807776E-01  -.1370110E-01  -.8100892E-02  -.2440357E-02
   .2268437E-02   .5511033E-02   .7519907E-02   .8914766E-02   .9809808E-02
   .9616000E-02   .8259751E-02   .6735182E-02   .6214763E-02   .7323920E-02
   .9962794E-02   .1312062E-01   .1532139E-01   .1517218E-01   .1255548E-01
   .8980137E-02   .5827858E-02   .2671463E-02  -.1563596E-02  -.6377643E-02
  -.1018297E-01  -.1253228E-01  -.1424597E-01  -.1549992E-01  -.1501653E-01
  -.1166212E-01  -.5994045E-02   .2927367E-03   .5735463E-02   .9692795E-02
   .1208255E-01   .1295187E-01   .1302588E-01   .1375886E-01   .1595886E-01
   .1935990E-01   .2319917E-01   .2667788E-01   .2932021E-01   .3091195E-01
   .3142732E-01   .3086844E-01   .2929425E-01   .2721290E-01   .2539343E-01
   .2408997E-01   .2282706E-01   .2095918E-01   .1809717E-01   .1429270E-01
   .9949684E-02   .5677725E-02   .2102868E-02  -.6024228E-03  -.2974260E-02
  -.5354419E-02  -.7260899E-02  -.8420193E-02  -.9591353E-02  -.1155926E-01
  -.1378109E-01  -.1528889E-01  -.1656119E-01  -.1854354E-01  -.2052064E-01
  -.2071998E-01  -.1855446E-01  -.1523372E-01  -.1221434E-01  -.1003555E-01
  -.8879974E-02  -.9280906E-02  -.1120521E-01  -.1301228E-01  -.1303380E-01
  -.1107223E-01  -.7732619E-02  -.3424669E-02   .1712591E-02   .7036533E-02
   .1105934E-01   .1260557E-01   .1169523E-01   .9066042E-02   .5580473E-02
   .2564938E-02   .1389080E-02   .2131495E-02   .3030321E-02   .2554515E-02
   .1178275E-02   .1257024E-03  -.2475809E-03  -.3001444E-03  -.1091974E-03
   .2790183E-03   .6090936E-03   .9477029E-03   .2142024E-02   .5096631E-02
   .9282583E-02   .1241560E-01   .1276126E-01   .1111529E-01   .9393799E-02
   .8397425E-02   .7801607E-02   .7491582E-02   .8133220E-02   .1021644E-01
   .1352212E-01   .1728505E-01   .2060232E-01   .2299441E-01   .2463835E-01
   .2575660E-01   .2598046E-01   .2404998E-01   .1934555E-01   .1327330E-01
   .8370434E-02   .6241226E-02   .6582065E-02   .7959447E-02   .8914897E-02
   .8214346E-02   .5269653E-02   .6302889E-03  -.4174502E-02  -.7675397E-02
  -.9169044E-02  -.8913399E-02  -.7934605E-02  -.7455514E-02  -.8222597E-02
  -.9987508E-02  -.1169222E-01  -.1241910E-01  -.1207649E-01  -.1122253E-01
  -.1090069E-01  -.1213952E-01  -.1500993E-01  -.1845536E-01  -.2076612E-01
  -.2043083E-01  -.1706341E-01  -.1149259E-01  -.5234790E-02   .9749523E-04
   .3567116E-02   .5022016E-02   .4084568E-02   .1869204E-03  -.5944980E-02
  -.1199781E-01  -.1563610E-01  -.1614997E-01  -.1480845E-01  -.1346084E-01
  -.1315215E-01  -.1443737E-01  -.1741260E-01  -.2129633E-01  -.2474341E-01
  -.2687531E-01  -.2803093E-01  -.2882572E-01  -.2907303E-01  -.2831471E-01
  -.2681711E-01  -.2552316E-01  -.2493701E-01  -.2464153E-01  -.2400271E-01
  -.2315867E-01  -.2267547E-01  -.2260941E-01  -.2217910E-01  -.2046963E-01
  -.1798588E-01  -.1577911E-01  -.1374092E-01  -.1103383E-01  -.7951581E-02
  -.5915444E-02  -.5503681E-02  -.5548340E-02  -.4360022E-02  -.1378433E-02
   .2928335E-02   .8218164E-02   .1430458E-01   .2029945E-01   .2532818E-01
   .2961341E-01   .3384006E-01   .3780983E-01   .4062116E-01   .4184216E-01
   .4184949E-01   .4102080E-01   .3930553E-01   .3706698E-01   .3546622E-01
   .3530746E-01   .3610689E-01   .3671405E-01   .3620158E-01   .3416113E-01
   .3030398E-01   .2465597E-01   .1838450E-01   .1314542E-01   .9424916E-02
   .6468917E-02   .3330991E-02  -.4046789E-03  -.4678690E-02  -.9303329E-02
  -.1415839E-01  -.1934603E-01  -.2476745E-01  -.2958544E-01  -.3281659E-01
  -.3425950E-01  -.3462697E-01  -.3490957E-01  -.3527106E-01  -.3483827E-01
  -.3238599E-01  -.2781685E-01  -.2249770E-01  -.1765249E-01  -.1324835E-01
  -.8882705E-02  -.5009143E-02  -.2130003E-02   .3649106E-03   .3126415E-02
   .5161846E-02   .4725236E-02   .2295691E-02   .6180651E-03   .1513041E-02
   .3827193E-02   .5278493E-02   .4936968E-02   .3751223E-02   .3139719E-02
   .3622650E-02   .4821891E-02   .5587677E-02   .4552219E-02   .1087792E-02
  -.4064896E-02  -.8859958E-02  -.1161165E-01  -.1232579E-01  -.1176280E-01
  -.1035431E-01  -.8404458E-02  -.6753064E-02  -.6412101E-02  -.7397605E-02
  -.8448216E-02  -.8188405E-02  -.6681575E-02  -.4722845E-02  -.2155809E-02
   .1331440E-02   .4556456E-02   .6139486E-02   .6446764E-02   .6498957E-02
   .6212429E-02   .4994464E-02   .3349609E-02   .2653856E-02   .3460008E-02
   .4659999E-02   .4601783E-02   .2850728E-02   .4875654E-03  -.9238557E-03
  -.5656400E-03   .1538545E-02   .5067988E-02   .9302947E-02   .1289485E-01
   .1477511E-01   .1547883E-01   .1691168E-01   .2082304E-01   .2682685E-01
   .3215611E-01   .3410250E-01   .3213231E-01   .2817896E-01   .2455324E-01
   .2189044E-01   .1917597E-01   .1500948E-01   .9039719E-02   .2174116E-02
  -.4141921E-02  -.9095892E-02  -.1290760E-01  -.1577826E-01  -.1711840E-01
  -.1668737E-01  -.1572762E-01  -.1607871E-01  -.1829347E-01  -.2082695E-01
  -.2239468E-01  -.2422904E-01  -.2758639E-01  -.3080558E-01  -.3099357E-01
  -.2784738E-01  -.2394823E-01  -.2107411E-01  -.1870250E-01  -.1616625E-01
  -.1400128E-01  -.1282384E-01  -.1228624E-01  -.1193322E-01  -.1204597E-01
  -.1328855E-01  -.1594445E-01  -.1924139E-01  -.2170481E-01  -.2203509E-01
  -.2014138E-01  -.1721847E-01  -.1475462E-01  -.1363091E-01  -.1370284E-01
  -.1437516E-01  -.1519094E-01  -.1581226E-01  -.1596405E-01  -.1517235E-01
  -.1306645E-01  -.9698230E-02  -.5891731E-02  -.2677326E-02  -.1256474E-03
   .2766872E-02   .6642396E-02   .1078758E-01   .1360109E-01   .1432294E-01
   .1411303E-01   .1494191E-01   .1746446E-01   .2059457E-01   .2332309E-01
   .2607395E-01   .3019416E-01   .3590966E-01   .4190749E-01   .4767769E-01
   .5419652E-01   .6145778E-01   .6704370E-01   .6848760E-01   .6668511E-01
   .6473403E-01   .6396836E-01   .6299364E-01   .6030907E-01   .5692412E-01
   .5481681E-01   .5416346E-01   .5351265E-01   .5151055E-01   .4763035E-01
   .4188978E-01   .3454394E-01   .2611612E-01   .1725989E-01   .8608236E-02
   .1172029E-02  -.4105864E-02  -.7060997E-02  -.8171673E-02  -.7938306E-02
  -.6989333E-02  -.6425137E-02  -.7480053E-02  -.1057554E-01  -.1448774E-01
  -.1707629E-01  -.1686253E-01  -.1364747E-01  -.8401152E-02  -.2876712E-02
   .1134211E-02   .2666844E-02   .2205339E-02   .9132539E-03  -.5387167E-03
  -.2056067E-02  -.3226517E-02  -.3096726E-02  -.1041579E-02   .2404058E-02
   .5980074E-02   .8746150E-02   .1038078E-01   .1039790E-01   .7775933E-02
   .2389203E-02  -.4183076E-02  -.9904466E-02  -.1396880E-01  -.1676561E-01
  -.1889777E-01  -.2081344E-01  -.2307472E-01  -.2613974E-01  -.2963292E-01
  -.3268989E-01  -.3500201E-01  -.3699181E-01  -.3939065E-01  -.4174527E-01
  -.4223707E-01  -.3930065E-01  -.3338769E-01  -.2705101E-01  -.2268922E-01
  -.2056497E-01  -.1973753E-01  -.1972907E-01  -.2028973E-01  -.2046376E-01
  -.1904696E-01  -.1610749E-01  -.1328706E-01  -.1189181E-01  -.1135770E-01
  -.1026452E-01  -.8214935E-02  -.6048790E-02  -.4481875E-02  -.3411892E-02
  -.2646746E-02  -.2678678E-02  -.4356363E-02  -.7563473E-02  -.1077128E-01
  -.1224647E-01  -.1155404E-01  -.1000153E-01  -.8640342E-02  -.6874039E-02
  -.3988923E-02  -.4343685E-03   .3677873E-02   .9230612E-02   .1634429E-01
   .2292559E-01   .2598835E-01   .2468820E-01   .2099397E-01   .1747875E-01
   .1539256E-01   .1450778E-01   .1361575E-01   .1130646E-01   .7115826E-02
   .2142825E-02  -.1875524E-02  -.3965478E-02  -.4610404E-02  -.4579014E-02
  -.3840858E-02  -.2438374E-02  -.1354557E-02  -.1614672E-02  -.2364441E-02
  -.1710321E-02   .2943278E-03   .1395796E-02   .5813795E-03  -.8995250E-03
  -.2103816E-02  -.3230442E-02  -.4294935E-02  -.4307329E-02  -.2454344E-02
   .4163372E-03   .2812215E-02   .3825001E-02   .3014866E-02   .3061744E-03
  -.3969426E-02  -.9284750E-02  -.1548566E-01  -.2197414E-01  -.2705480E-01
  -.2949409E-01  -.3071979E-01  -.3319044E-01  -.3654085E-01  -.3796912E-01
  -.3613893E-01  -.3305646E-01  -.3152307E-01  -.3201427E-01  -.3295477E-01
  -.3310263E-01  -.3258214E-01  -.3143907E-01  -.2829108E-01  -.2169873E-01
  -.1246351E-01  -.3583014E-02   .2617702E-02   .6575883E-02   .1022631E-01
   .1407319E-01   .1687537E-01   .1794603E-01   .1868880E-01   .2102453E-01
   .2498093E-01   .2872551E-01   .3005051E-01   .2716657E-01   .1990798E-01
   .1153319E-01   .7001408E-02   .7867498E-02   .1078038E-01   .1188540E-01
   .1184406E-01   .1422109E-01   .2002080E-01   .2611322E-01   .2861034E-01
   .2608939E-01   .1964470E-01   .1138388E-01   .4247540E-02   .1511222E-02
   .4842288E-02   .1271037E-01   .2141972E-01   .2771371E-01   .2988339E-01
   .2741613E-01   .2077347E-01   .1118788E-01   .6324191E-03  -.8471803E-02
  -.1412325E-01  -.1506557E-01  -.1072356E-01  -.2008987E-02   .8342623E-02
   .1710209E-01   .2240692E-01   .2431285E-01   .2401635E-01   .2239408E-01
   .1913283E-01   .1337097E-01   .5467587E-02  -.1671637E-02  -.4435487E-02
  -.2010602E-02   .3317020E-02   .8859843E-02   .1312251E-01   .1497681E-01
   .1306064E-01   .7575084E-02   .1894643E-02   .5719957E-03   .4925778E-02
   .1240131E-01   .1974792E-01   .2576439E-01   .3097139E-01   .3535789E-01
   .3722577E-01   .3491166E-01   .2898684E-01   .2211994E-01   .1613115E-01
   .1017934E-01   .2619491E-02  -.6274891E-02  -.1398686E-01  -.1815399E-01
  -.1821223E-01  -.1509889E-01  -.1107894E-01  -.9282038E-02  -.1183083E-01
  -.1798954E-01  -.2481278E-01  -.2968420E-01  -.3153342E-01  -.3076845E-01
  -.2900760E-01  -.2785456E-01  -.2763931E-01  -.2749288E-01  -.2659565E-01
  -.2539756E-01  -.2522446E-01  -.2641155E-01  -.2743111E-01  -.2617577E-01
  -.2225601E-01  -.1824803E-01  -.1755666E-01  -.2124734E-01  -.2727561E-01
  -.3247453E-01  -.3524822E-01  -.3548555E-01  -.3256100E-01  -.2553601E-01
  -.1556177E-01  -.6588857E-02  -.2283029E-02  -.2549175E-02  -.4412733E-02
  -.5500041E-02  -.5450005E-02  -.4496414E-02  -.2122857E-02   .2225102E-02
   .8114602E-02   .1408924E-01   .1949363E-01   .2500983E-01   .3087086E-01
   .3576573E-01   .3869774E-01   .4045362E-01   .4170336E-01   .4094130E-01
   .3604790E-01   .2742357E-01   .1858423E-01   .1338763E-01   .1303462E-01
   .1629829E-01   .2096925E-01   .2464158E-01   .2563996E-01   .2414860E-01
   .2224118E-01   .2202454E-01   .2378428E-01   .2605781E-01   .2717034E-01
   .2690293E-01   .2639318E-01   .2613387E-01   .2452037E-01   .1929475E-01
   .1037107E-01   .7484434E-05  -.8871333E-02  -.1469509E-01  -.1802861E-01
  -.2008317E-01  -.2096122E-01  -.1986617E-01  -.1678716E-01  -.1283746E-01
  -.9098258E-02  -.6005089E-02  -.4463989E-02  -.5870894E-02  -.9953014E-02
  -.1414497E-01  -.1607426E-01  -.1486777E-01  -.1029086E-01  -.3382114E-02
   .2930271E-02   .6617272E-02   .8674817E-02   .1089179E-01   .1288630E-01
   .1327571E-01   .1286241E-01   .1424787E-01   .1812320E-01   .2230769E-01
   .2445327E-01   .2411228E-01   .2231933E-01   .2005863E-01   .1772164E-01
   .1555221E-01   .1385077E-01   .1241280E-01   .1097385E-01   .9393581E-02
   .7606994E-02   .5512166E-02   .2491049E-02  -.2386314E-02  -.9036604E-02
  -.1540028E-01  -.1798636E-01  -.1489820E-01  -.8546106E-02  -.3665916E-02
  -.2464694E-02  -.2461733E-02   .3599446E-03   .6866612E-02   .1401762E-01
   .1810450E-01   .1776555E-01   .1453577E-01   .1085539E-01   .8332178E-02
   .8192324E-02   .1098597E-01   .1480965E-01   .1677061E-01   .1669092E-01
   .1733568E-01   .2003962E-01   .2271103E-01   .2274096E-01   .1921063E-01
   .1221426E-01   .2134226E-02  -.9464193E-02  -.1953177E-01  -.2519639E-01
  -.2575116E-01  -.2267576E-01  -.1830466E-01  -.1449577E-01  -.1143324E-01
  -.7904686E-02  -.2761366E-02   .3768255E-02   .1064195E-01   .1713203E-01
   .2203504E-01   .2349127E-01   .2098508E-01   .1649878E-01   .1331358E-01
   .1336363E-01   .1613186E-01   .1989602E-01   .2300447E-01   .2457771E-01
   .2481778E-01   .2476011E-01   .2509145E-01   .2494889E-01   .2249241E-01
   .1700093E-01   .9745238E-02   .3405036E-02   .2214517E-03   .1208088E-03
   .5396340E-03  -.1353496E-02  -.6715918E-02  -.1533888E-01  -.2566268E-01
  -.3518597E-01  -.4119602E-01  -.4197130E-01  -.3831138E-01  -.3277013E-01
  -.2756176E-01  -.2349417E-01  -.2046286E-01  -.1867352E-01  -.1861570E-01
  -.1956534E-01  -.1942356E-01  -.1741050E-01  -.1532407E-01  -.1545703E-01
  -.1752787E-01  -.1848193E-01  -.1580316E-01  -.1034494E-01  -.4669433E-02
  -.3077010E-03   .1921750E-02   .6461287E-03  -.5334114E-02  -.1489642E-01
  -.2457286E-01  -.3119701E-01  -.3400786E-01  -.3415758E-01  -.3269229E-01
  -.2912442E-01  -.2210546E-01  -.1220112E-01  -.3557593E-02  -.8947426E-03
  -.5047199E-02  -.1217121E-01  -.1737004E-01  -.1866202E-01  -.1757381E-01
  -.1724486E-01  -.2001448E-01  -.2507410E-01  -.2807084E-01  -.2417664E-01
  -.1236453E-01   .3182039E-02   .1614975E-01   .2271336E-01   .2312663E-01
   .1962449E-01   .1462785E-01   .1037169E-01   .8652385E-02   .9795144E-02
   .1246119E-01   .1519386E-01   .1782547E-01   .2231308E-01   .3194533E-01
   .4727913E-01   .6312085E-01   .7240764E-01   .7343231E-01   .7119737E-01
   .7138302E-01   .7418310E-01   .7538629E-01   .7157051E-01   .6224156E-01
   .4876021E-01   .3337368E-01   .1990405E-01   .1257531E-01   .1256487E-01
   .1602918E-01   .1668161E-01   .1147797E-01   .2564978E-02  -.7130837E-02
  -.1779704E-01  -.3065450E-01  -.4437471E-01  -.5568096E-01  -.6223582E-01
  -.6340053E-01  -.5943002E-01  -.5128863E-01  -.4034255E-01  -.2797165E-01
  -.1591678E-01  -.6458887E-02  -.2103161E-02  -.4357553E-02  -.1198479E-01
  -.2091171E-01  -.2636113E-01  -.2612176E-01  -.2232047E-01  -.1869752E-01
  -.1661077E-01  -.1517594E-01  -.1439639E-01  -.1615020E-01  -.2096334E-01
  -.2594701E-01  -.2848117E-01  -.3037805E-01  -.3530567E-01  -.4302165E-01
  -.4892609E-01  -.4919195E-01  -.4399880E-01  -.3556088E-01  -.2606654E-01
  -.1853726E-01  -.1697211E-01  -.2291341E-01  -.3283201E-01  -.4006617E-01
  -.3983319E-01  -.3166476E-01  -.1720777E-01   .2464596E-02   .2619782E-01
   .5013928E-01   .6700649E-01   .6936632E-01   .5362618E-01   .2198041E-01
  -.1820740E-01  -.5774378E-01  -.9074541E-01  -.1172102E+00  -.1401262E+00
  -.1596592E+00  -.1706720E+00  -.1656003E+00  -.1399046E+00  -.9742829E-01
  -.5185236E-01  -.2097697E-01  -.1671025E-01  -.3729434E-01  -.6754081E-01
  -.8748604E-01  -.8499213E-01  -.6277171E-01  -.3268410E-01  -.4231696E-02
   .1938287E-01   .3676606E-01   .4625771E-01   .4912065E-01   .4837194E-01
   .4416952E-01   .3620843E-01   .2872449E-01   .2642895E-01   .2598805E-01
   .1858087E-01   .2103498E-02  -.1414480E-01  -.1896542E-01  -.1093755E-01
  -.1320988E-03   .2076359E-03  -.1579938E-01  -.4120538E-01  -.6077465E-01
  -.6265372E-01  -.4750923E-01  -.2732674E-01  -.1536493E-01  -.1664620E-01
  -.2630365E-01  -.3584550E-01  -.4059956E-01  -.4110723E-01  -.3845094E-01
  -.3105220E-01  -.1769962E-01  -.1246670E-02   .1338910E-01   .2357476E-01
   .2948466E-01   .3158359E-01   .2912426E-01   .2155981E-01   .1006604E-01
  -.3788745E-02  -.1943708E-01  -.3631146E-01  -.5083941E-01  -.5515933E-01
  -.4250645E-01  -.1604775E-01   .1115909E-01   .2710908E-01   .2868214E-01
   .2028201E-01   .8836009E-02   .8575959E-04  -.3173230E-02  -.4685756E-03
   .8011161E-02   .2095353E-01   .3411619E-01   .4185985E-01   .4087941E-01
   .3145870E-01   .1651730E-01   .1295925E-02  -.6964508E-02  -.3514540E-02
   .8174689E-02   .1860115E-01   .2217356E-01   .2284288E-01   .2735696E-01
   .3594867E-01   .4384014E-01   .4958737E-01   .5714549E-01   .6987025E-01
   .8656153E-01   .1040851E+00   .1205641E+00   .1347838E+00   .1446150E+00
   .1483971E+00   .1476167E+00   .1469414E+00   .1499537E+00   .1545333E+00
   .1541938E+00   .1451074E+00   .1307727E+00   .1180299E+00   .1090989E+00
   .1002187E+00   .8722571E-01   .6905861E-01   .4595190E-01   .1778304E-01
  -.1361068E-01  -.4228209E-01  -.6073238E-01  -.6465000E-01  -.5522222E-01
  -.3875381E-01  -.2403176E-01  -.1770269E-01  -.1954083E-01  -.2322001E-01
  -.2329214E-01  -.1951740E-01  -.1475421E-01  -.1191426E-01  -.1236561E-01
  -.1537609E-01  -.1762510E-01  -.1526434E-01  -.7400706E-02   .3865938E-02
   .1581491E-01   .2721437E-01   .3792544E-01   .4667129E-01   .4994891E-01
   .4421997E-01   .2999526E-01   .1295267E-01  -.7069728E-04  -.6206332E-02
  -.7210736E-02  -.5930226E-02  -.3157895E-02   .2233121E-02   .1150310E-01
   .2333917E-01   .3237711E-01   .3209733E-01   .2074240E-01   .4351496E-02
  -.7992164E-02  -.1211968E-01  -.1099355E-01  -.1006749E-01  -.1271086E-01
  -.1947882E-01  -.2929287E-01  -.4058875E-01  -.5201835E-01  -.6262373E-01
  -.7045230E-01  -.7171335E-01  -.6304735E-01  -.4545133E-01  -.2486605E-01
  -.8823028E-02  -.3485723E-02  -.1036736E-01  -.2299383E-01  -.3028829E-01
  -.2646166E-01  -.1651642E-01  -.9959116E-02  -.1057862E-01  -.1428062E-01
  -.1507364E-01  -.1024129E-01  -.4168043E-03   .1167642E-01   .2130563E-01
   .2275493E-01   .1344757E-01  -.2382007E-02  -.1580960E-01  -.2091270E-01
  -.1939115E-01  -.1762351E-01  -.2086777E-01  -.3005707E-01  -.4179138E-01
  -.4922029E-01  -.4571800E-01  -.3193890E-01  -.1804313E-01  -.1467575E-01
  -.2148396E-01  -.2832938E-01  -.2808049E-01  -.2343284E-01  -.1997470E-01
  -.1744087E-01  -.1155783E-01  -.1896441E-02   .6795257E-02   .1044459E-01
   .9662565E-02   .7220660E-02   .4099321E-02  -.7341246E-03  -.7168005E-02
  -.1227496E-01  -.1366380E-01  -.1328424E-01  -.1591150E-01  -.2442762E-01
  -.3678928E-01  -.4829594E-01  -.5524143E-01  -.5655701E-01  -.5439792E-01
  -.5286334E-01  -.5467302E-01  -.5861918E-01  -.6151458E-01  -.6198454E-01
  -.6042647E-01  -.5578331E-01  -.4564765E-01  -.3094090E-01  -.1789077E-01
  -.1256328E-01  -.1435578E-01  -.1689071E-01  -.1537783E-01  -.1097040E-01
  -.7575795E-02  -.6545441E-02  -.5536358E-02  -.1697383E-02   .4855214E-02
   .1093263E-01   .1298844E-01   .9816772E-02   .3474264E-02  -.2443880E-02
  -.5775427E-02  -.6783263E-02  -.6512901E-02  -.5531778E-02  -.3700437E-02
  -.3696851E-03   .5768790E-02   .1545329E-01   .2688051E-01   .3640638E-01
   .4195145E-01   .4426392E-01   .4424015E-01   .4066198E-01   .3149161E-01
   .1576710E-01  -.5491468E-02  -.2780065E-01  -.4316459E-01  -.4487908E-01
  -.3426890E-01  -.2065074E-01  -.1303205E-01  -.1363903E-01  -.1863662E-01
  -.2182977E-01  -.1886530E-01  -.1048187E-01  -.1697623E-02   .3377853E-02
   .5001519E-02   .5733683E-02   .7090468E-02   .1080222E-01   .2092703E-01
   .4029641E-01   .6505853E-01   .8574376E-01   .9475544E-01   .9167557E-01
   .8168203E-01   .7063758E-01   .6284758E-01   .6273357E-01   .7462807E-01
   .9794002E-01   .1237768E+00   .1398805E+00   .1393952E+00   .1236935E+00
   .9932954E-01   .7485933E-01   .5931343E-01   .5918131E-01   .7334345E-01
   .9205103E-01   .1030084E+00   .9972440E-01   .8425043E-01   .6118847E-01
   .3143704E-01  -.6062076E-02  -.4808278E-01  -.8515057E-01  -.1071590E+00
  -.1117797E+00  -.1089147E+00  -.1149209E+00  -.1384141E+00  -.1697765E+00
  -.1881258E+00  -.1808947E+00  -.1551244E+00  -.1298728E+00  -.1187649E+00
  -.1195811E+00  -.1199890E+00  -.1104195E+00  -.8906450E-01  -.5772327E-01
  -.2068441E-01   .1137557E-01   .2459810E-01   .1540533E-01  -.1419109E-02
  -.4878064E-02   .1246060E-01   .3983038E-01   .6026033E-01   .6377172E-01
   .5215075E-01   .3717326E-01   .3509415E-01   .5706915E-01   .1003172E+00
   .1467055E+00   .1684378E+00   .1417467E+00   .6763362E-01  -.1949751E-01
  -.7384428E-01  -.7371473E-01  -.3233333E-01   .2218847E-01   .6849373E-01
   .9451115E-01   .9124406E-01   .5629095E-01   .3111905E-02  -.4369142E-01
  -.6963320E-01  -.8157617E-01  -.9328103E-01  -.1069960E+00  -.1164320E+00
  -.1201395E+00  -.1219006E+00  -.1225430E+00  -.1203492E+00  -.1177009E+00
  -.1213746E+00  -.1346630E+00  -.1511886E+00  -.1586155E+00  -.1476979E+00
  -.1188907E+00  -.8205132E-01  -.4975627E-01  -.2860598E-01  -.1400005E-01
   .3680328E-02   .2380905E-01   .3355040E-01   .2684686E-01   .1819875E-01
   .2843526E-01   .5885172E-01   .8780376E-01   .9358832E-01   .7664192E-01
   .5685939E-01   .5164294E-01   .6188843E-01   .7864491E-01   .9713948E-01
   .1191121E+00   .1412311E+00   .1462421E+00   .1168955E+00   .6219606E-01
   .1604794E-01   .1196226E-02   .6367424E-02   .7885554E-02  -.2697410E-03
  -.8483438E-02  -.1051120E-01  -.7904959E-02  -.1983293E-02   .8270041E-02
   .2089479E-01   .2958077E-01   .2960698E-01   .2463217E-01   .2649589E-01
   .4392370E-01   .6738378E-01   .7173329E-01   .4415973E-01   .4914355E-02
  -.1159640E-01   .6072227E-02   .3865224E-01   .6238774E-01   .7001252E-01
   .6634222E-01   .5680579E-01   .4484415E-01   .3406309E-01   .2941354E-01
   .3421023E-01   .4311176E-01   .4032974E-01   .1319832E-01  -.3226476E-01
  -.7827260E-01  -.1150354E+00  -.1419498E+00  -.1535878E+00  -.1400157E+00
  -.1011976E+00  -.4912911E-01   .1968409E-02   .3749942E-01   .4349286E-01
   .2115131E-01  -.7196415E-02  -.2101015E-01  -.2294003E-01  -.2695874E-01
  -.3298658E-01  -.2368241E-01   .1622289E-01   .8140406E-01   .1437023E+00
   .1699170E+00   .1499893E+00   .1087158E+00   .8281305E-01   .8594890E-01
   .1009467E+00   .1037551E+00   .8873998E-01   .7236326E-01   .7485402E-01
   .9911088E-01   .1281932E+00   .1428058E+00   .1374703E+00   .1212510E+00
   .1070444E+00   .9801011E-01   .8463846E-01   .5926408E-01   .3024015E-01
   .1342949E-01   .1138813E-01   .1225756E-01   .9212525E-02   .9534460E-02
   .2040987E-01   .3375823E-01   .3318206E-01   .1389974E-01  -.8994779E-02
  -.1436695E-01   .8593317E-03   .1163899E-01  -.1297651E-01  -.7150887E-01
  -.1225631E+00  -.1274415E+00  -.9419060E-01  -.6361102E-01  -.5599959E-01
  -.5491193E-01  -.4620171E-01  -.4458251E-01  -.6698457E-01  -.1007886E+00
  -.1155736E+00  -.9596636E-01  -.5371817E-01  -.1548785E-01  -.3294009E-02
  -.1798106E-01  -.3774746E-01  -.3972930E-01  -.2146471E-01   .5811436E-02
   .3819875E-01   .7903737E-01   .1210559E+00   .1453457E+00   .1431494E+00
   .1291492E+00   .1271538E+00   .1444714E+00   .1637314E+00   .1624022E+00
   .1371245E+00   .1014771E+00   .6595115E-01   .3593142E-01   .2382954E-01
   .3912596E-01   .6537838E-01   .6975228E-01   .3975975E-01  -.3970493E-02
  -.2938813E-01  -.1624045E-01   .3073956E-01   .7643287E-01   .7483074E-01
   .1334881E-01  -.6847295E-01  -.1176019E+00  -.1161410E+00  -.8303614E-01
  -.4674928E-01  -.3153688E-01  -.5062637E-01  -.9010445E-01  -.1144431E+00
  -.1060044E+00  -.8185909E-01  -.6118606E-01  -.3985587E-01  -.8067368E-02
   .2799213E-01   .5326750E-01   .5844962E-01   .4096585E-01   .4758553E-02
  -.3505677E-01  -.5818700E-01  -.5613382E-01  -.3675020E-01  -.8095817E-02
   .3411327E-01   .9363937E-01   .1560227E+00   .1960615E+00   .1990289E+00
   .1668741E+00   .1116138E+00   .5287414E-01   .1495560E-01   .1598737E-01
   .5738913E-01   .1195796E+00   .1669565E+00   .1685075E+00   .1222551E+00
   .5625607E-01   .2517131E-02  -.2788014E-01  -.4427900E-01  -.5773656E-01
  -.6801250E-01  -.7033178E-01  -.6944472E-01  -.7545655E-01  -.8523551E-01
  -.8174723E-01  -.5831781E-01  -.3404533E-01  -.3763826E-01  -.7655592E-01
  -.1253632E+00  -.1486907E+00  -.1326303E+00  -.8850574E-01  -.3624517E-01
   .2080912E-02   .3885166E-02  -.3416258E-01  -.8104551E-01  -.9833599E-01
  -.8120945E-01  -.5709694E-01  -.5002045E-01  -.6283490E-01  -.9056342E-01
  -.1301018E+00  -.1693381E+00  -.1810301E+00  -.1452906E+00  -.7973302E-01
  -.2951006E-01  -.1588679E-01  -.1008126E-01   .2173346E-01   .6108461E-01
   .5556400E-01  -.7215973E-02  -.7726829E-01  -.1047748E+00  -.9707069E-01
  -.9496299E-01  -.1153986E+00  -.1374266E+00  -.1270070E+00  -.5823809E-01
   .7387853E-01   .2319533E+00   .3253269E+00   .2658066E+00   .7613827E-01
  -.8947335E-01  -.9638454E-01   .1771456E-01   .1081913E+00   .1180397E+00
   .1192841E+00   .1691948E+00   .2240457E+00   .2169976E+00   .1471772E+00
   .6303734E-01   .8325795E-02   .5308719E-02   .5004459E-01   .1047332E+00
   .1234925E+00   .9745594E-01   .5376155E-01   .1031129E-01  -.4001633E-01
  -.9533841E-01  -.1282244E+00  -.1236076E+00  -.1101363E+00  -.1290887E+00
  -.1837979E+00  -.2372646E+00  -.2498989E+00  -.2074178E+00  -.1234390E+00
  -.3008533E-01   .3499014E-01   .4358879E-01  -.5839684E-02  -.7486998E-01
  -.9913149E-01  -.4178861E-01   .6241285E-01   .1341663E+00   .1227049E+00
   .4154553E-01  -.5608932E-01  -.1212301E+00  -.1420990E+00  -.1461483E+00
  -.1647923E+00  -.1967212E+00  -.2083401E+00  -.1647232E+00  -.6391386E-01
   .4828664E-01   .1045887E+00   .7677805E-01   .9196253E-02  -.2714456E-01
  -.1255535E-01   .8082984E-02  -.1307042E-01  -.7713898E-01  -.1529265E+00
  -.2103204E+00  -.2242887E+00  -.1718698E+00  -.5559757E-01   .7488823E-01
   .1482735E+00   .1242580E+00   .1671558E-01  -.1222452E+00  -.2316398E+00
  -.2718109E+00  -.2389568E+00  -.1482896E+00  -.1585739E-01   .1268093E+00
   .2204303E+00   .2141890E+00   .1170616E+00  -.1380194E-02  -.6381924E-01
  -.4178977E-01   .2695636E-01   .7459269E-01   .6290926E-01   .7695260E-02
  -.5114527E-01  -.8623348E-01  -.8788576E-01  -.5892935E-01  -.1716227E-01
   .1491521E-01   .3061489E-01   .3529241E-01   .2568521E-01  -.3836948E-02
  -.3296443E-01  -.2365164E-01   .2690999E-01   .6508218E-01   .3698547E-01
  -.4599288E-01  -.1170753E+00  -.1171316E+00  -.3443324E-01   .9179972E-01
   .1838151E+00   .1764892E+00   .9229171E-01   .3333411E-01   .5781555E-01
   .9759238E-01   .5203764E-01  -.6524765E-01  -.1404270E+00  -.1058955E+00
  -.9001305E-02   .6144583E-01   .6400960E-01   .2113989E-01  -.9267909E-02
   .2632818E-01   .1349720E+00   .2639824E+00   .3372845E+00   .3066736E+00
   .1814355E+00   .2834086E-01  -.6814844E-01  -.7190646E-01  -.2142716E-01
   .1455926E-01  -.4264195E-02  -.6731188E-01  -.1224301E+00  -.1106128E+00
  -.1618520E-01   .1121801E+00   .1990444E+00   .2018254E+00   .1365448E+00
   .5486628E-01  -.2343724E-02  -.3594931E-01  -.7345100E-01  -.1220613E+00
  -.1461715E+00  -.9769561E-01   .3163960E-01   .1875950E+00   .2838262E+00
   .2611310E+00   .1294792E+00  -.3387241E-01  -.1303965E+00  -.1072372E+00
   .5502585E-02   .1241240E+00   .1768031E+00   .1448917E+00   .6301370E-01
  -.7443506E-02  -.1852451E-01   .3159421E-01   .1034639E+00   .1525276E+00
   .1571004E+00   .1232676E+00   .7914300E-01   .5885805E-01   .7686978E-01
   .1149153E+00   .1359011E+00   .1128385E+00   .5434275E-01   .5317190E-02
   .9860629E-02   .6752991E-01   .1337150E+00   .1608477E+00   .1338479E+00
   .7411349E-01   .1916049E-01  -.3288196E-02   .1273724E-01   .5681436E-01
   .1090798E+00   .1415067E+00   .1282049E+00   .6840495E-01  -.2788671E-02
  -.3822896E-01  -.2263013E-01   .8287897E-02   .2062948E-02  -.5267374E-01
  -.1105977E+00  -.1169827E+00  -.6287963E-01   .1164286E-01   .5961713E-01
   .6293997E-01   .3350813E-01  -.8844526E-02  -.5284465E-01  -.9030560E-01
  -.1029091E+00  -.6998806E-01   .2163123E-02   .6765586E-01   .7215405E-01
   .3312842E-02  -.9138978E-01  -.1401836E+00  -.1046034E+00  -.8155609E-02
   .8412328E-01   .1115719E+00   .5316530E-01  -.6413203E-01  -.1809833E+00
  -.2388093E+00  -.2164011E+00  -.1422520E+00  -.6734308E-01  -.2379678E-01
  -.1023461E-01  -.9300397E-02  -.7868777E-02  -.1817095E-02   .5370235E-02
   .3872652E-02  -.1335736E-01  -.3947923E-01  -.5689038E-01  -.5360029E-01
  -.3282989E-01  -.3652673E-02   .3079152E-01   .6850752E-01   .9774604E-01
   .1024205E+00   .7813721E-01   .3653150E-01  -.2108173E-02  -.1889301E-01
  -.6972554E-02   .2074234E-01   .3728501E-01   .2282227E-01  -.1813347E-01
  -.6341795E-01  -.9659667E-01  -.1166067E+00  -.1241618E+00  -.1106942E+00
  -.7182941E-01  -.2816459E-01  -.1626820E-01  -.5046696E-01  -.1046420E+00
  -.1421500E+00  -.1517584E+00  -.1427994E+00  -.1210122E+00  -.8825629E-01
  -.5649295E-01  -.4267761E-01  -.5033442E-01  -.6605566E-01  -.7255014E-01
  -.6089324E-01  -.3561886E-01  -.1371308E-01  -.1454635E-01  -.4465702E-01
  -.9240988E-01  -.1392649E+00  -.1739657E+00  -.1935140E+00  -.1949642E+00
  -.1755308E+00  -.1410192E+00  -.1056891E+00  -.7980597E-01  -.6496477E-01
  -.6395903E-01  -.8103541E-01  -.1034712E+00  -.9765100E-01  -.3949691E-01
   .5595593E-01   .1445505E+00   .1864077E+00   .1657629E+00   .9369416E-01
   .8039008E-02  -.3684965E-01  -.4065061E-02   .8761905E-01   .1694631E+00
   .1837511E+00   .1372520E+00   .8379805E-01   .6297522E-01   .7260878E-01
   .9228302E-01   .1070300E+00   .1045843E+00   .7306921E-01   .1406351E-01
  -.4832181E-01  -.7874762E-01  -.5690268E-01   .8543122E-03   .4985671E-01
   .5620216E-01   .2413119E-01  -.1831006E-01  -.4894954E-01  -.6299122E-01
  -.6856347E-01  -.7820139E-01  -.9922460E-01  -.1265953E+00  -.1485103E+00
  -.1591817E+00  -.1608924E+00  -.1572787E+00  -.1505073E+00  -.1407666E+00
  -.1256029E+00  -.1038964E+00  -.8064806E-01  -.6040899E-01  -.3751143E-01
  -.2132392E-02   .4291849E-01   .7897232E-01   .8911830E-01   .7283197E-01
   .3874801E-01  -.8144753E-02  -.6279617E-01  -.1117180E+00  -.1417163E+00
  -.1527346E+00  -.1517977E+00  -.1392650E+00  -.1110705E+00  -.7640029E-01
  -.6034847E-01  -.7823060E-01  -.1152969E+00  -.1414674E+00  -.1400433E+00
  -.1152669E+00  -.7889259E-01  -.4186591E-01  -.1738691E-01  -.1812523E-01
  -.4668881E-01  -.9395573E-01  -.1456862E+00  -.1859353E+00  -.2008911E+00
  -.1876550E+00  -.1546313E+00  -.1107240E+00  -.6285729E-01  -.2341291E-01
  -.5181548E-02  -.6408032E-02  -.1313069E-01  -.1583832E-01  -.1478244E-01
  -.1267276E-01  -.1159628E-01  -.1456489E-01  -.2285199E-01  -.3303658E-01
  -.4040401E-01  -.4573572E-01  -.5495610E-01  -.6995381E-01  -.8471651E-01
  -.9521423E-01  -.1096566E+00  -.1409718E+00  -.1872370E+00  -.2271068E+00
  -.2377068E+00  -.2128939E+00  -.1649914E+00  -.1143795E+00  -.7835929E-01
  -.6342174E-01  -.6272160E-01  -.6189554E-01  -.4738854E-01  -.1239050E-01
   .4056045E-01   .1016084E+00   .1601854E+00   .2079294E+00   .2316897E+00
   .2100715E+00   .1292355E+00   .7061461E-02  -.1065023E+00  -.1615084E+00
  -.1433971E+00  -.8120043E-01  -.2493535E-01  -.1052169E-01  -.3565337E-01
  -.6269607E-01  -.4787794E-01   .2241889E-01   .1170554E+00   .1824330E+00
   .1815275E+00   .1142647E+00   .1324760E-01  -.7148944E-01  -.1002838E+00
  -.7551029E-01  -.3875211E-01  -.2529784E-01  -.3237473E-01  -.4156081E-01
  -.5499160E-01  -.8833231E-01  -.1374201E+00  -.1742426E+00  -.1760717E+00
  -.1430761E+00  -.8840947E-01  -.2793058E-01   .2024420E-01   .4332364E-01
   .4603950E-01   .4549380E-01   .5242581E-01   .6381838E-01   .7321290E-01
   .8017714E-01   .8472686E-01   .7818311E-01   .4825371E-01  -.5757659E-02
  -.6607567E-01  -.1057569E+00  -.1067315E+00  -.7359462E-01  -.2805120E-01
   .9846138E-02   .2918127E-01   .2123036E-01  -.1889568E-01  -.8051913E-01
  -.1386933E+00  -.1713526E+00  -.1740508E+00  -.1603380E+00  -.1482833E+00
  -.1451284E+00  -.1446673E+00  -.1374575E+00  -.1187295E+00  -.8409741E-01
  -.2376216E-01   .6687776E-01   .1676564E+00   .2341301E+00   .2279664E+00
   .1522831E+00   .5401251E-01  -.1580352E-01  -.4081261E-01  -.3035929E-01
   .9008991E-02   .6763515E-01   .1177667E+00   .1344951E+00   .1168534E+00
   .7223665E-01   .7698115E-02  -.5250314E-01  -.7424447E-01  -.4940584E-01
  -.3693065E-02   .3192961E-01   .4610185E-01   .4973158E-01   .6156907E-01
   .8708085E-01   .1129820E+00   .1271877E+00   .1341220E+00   .1418040E+00
   .1450501E+00   .1303716E+00   .9133851E-01   .3543962E-01  -.1907481E-01
  -.5361425E-01  -.6155326E-01  -.4898560E-01  -.2382152E-01   .9624497E-02
   .4408851E-01   .6700957E-01   .6903362E-01   .5143131E-01   .2610126E-01
   .9242481E-02   .8938550E-02   .1715889E-01   .2059864E-01   .1775506E-01
   .1731551E-01   .2529628E-01   .4094006E-01   .6064473E-01   .8116663E-01
   .1012076E+00   .1209933E+00   .1394142E+00   .1547511E+00   .1691996E+00
   .1877470E+00   .2087371E+00   .2200756E+00   .2098254E+00   .1783670E+00
   .1365626E+00   .9614534E-01   .6551848E-01   .4991346E-01   .4983623E-01
   .6074946E-01   .7764355E-01   .9930027E-01   .1262615E+00   .1567749E+00
   .1877213E+00   .2146964E+00   .2259923E+00   .2005242E+00   .1243227E+00
   .1625220E-01  -.7197556E-01  -.9243650E-01  -.4148899E-01   .3453470E-01
   .7437793E-01   .5048370E-01  -.9491571E-02  -.5138818E-01  -.4652419E-01
  -.1168647E-01   .1991902E-01   .3608078E-01   .4762936E-01   .6308772E-01
   .7925192E-01   .9346330E-01   .1029302E+00   .9403528E-01   .5654891E-01
   .7113237E-02  -.2272696E-01  -.1979188E-01   .3573329E-02   .2889678E-01
   .4295849E-01   .3512244E-01   .7150853E-03  -.4758497E-01  -.8232200E-01
  -.8536021E-01  -.6487627E-01  -.4177791E-01  -.2458370E-01  -.6945029E-02
   .1525846E-01   .3696809E-01   .5333697E-01   .6617193E-01   .7787962E-01
   .8493636E-01   .8189405E-01   .6978524E-01   .5589522E-01   .4467953E-01
   .3284611E-01   .1409983E-01  -.1205014E-01  -.3441858E-01  -.3676672E-01
  -.1547829E-01   .1612993E-01   .4450383E-01   .6642146E-01   .8266055E-01
   .9141352E-01   .8683234E-01   .6398438E-01   .3350653E-01   .1995912E-01
   .3095582E-01   .4346710E-01   .3545086E-01   .1364968E-01  -.3274059E-02
  -.1247386E-01  -.2413475E-01  -.4359199E-01  -.6589315E-01  -.8017139E-01
  -.7466905E-01  -.4842593E-01  -.2057908E-01  -.1410515E-01  -.2692936E-01
  -.3204656E-01  -.1060329E-01   .2732239E-01   .6005656E-01   .7912748E-01
   .8928429E-01   .9597004E-01   .1017034E+00   .1087248E+00   .1176709E+00
   .1229267E+00   .1138360E+00   .8505938E-01   .4359045E-01   .5422924E-03
  -.4081732E-01  -.8043532E-01  -.1081717E+00  -.1071679E+00  -.7425749E-01
  -.3026768E-01  -.5689313E-02  -.1417811E-01  -.4118199E-01  -.6312505E-01
  -.6877804E-01  -.5220664E-01  -.4888095E-02   .6347278E-01   .1077350E+00
   .7729910E-01  -.3004355E-01  -.1546332E+00  -.2251857E+00  -.2244969E+00
  -.1961957E+00  -.1849596E+00  -.1896956E+00  -.1866019E+00  -.1708814E+00
  -.1499423E+00  -.1170181E+00  -.6170316E-01   .3357778E-02   .4902793E-01
   .5904546E-01   .4017916E-01   .9670053E-02  -.1603263E-01  -.2353551E-01
  -.4682896E-02   .3814625E-01   .8974375E-01   .1289737E+00   .1422965E+00
   .1322058E+00   .1126617E+00   .9657288E-01   .8617186E-01   .7468779E-01
   .5566352E-01   .2894713E-01  -.1636227E-02  -.3091736E-01  -.5222773E-01
  -.6049321E-01  -.5696592E-01  -.4728112E-01  -.3620702E-01  -.2598088E-01
  -.1697722E-01  -.9151911E-02  -.2686008E-02   .3888572E-02   .1409423E-01
   .2901725E-01   .4290528E-01   .4492106E-01   .2639585E-01  -.1052376E-01
  -.4943793E-01  -.6767389E-01  -.5269181E-01  -.8977238E-02   .4866392E-01
   .1013423E+00   .1294448E+00   .1209943E+00   .8199679E-01   .3258616E-01
  -.1067570E-01  -.4144362E-01  -.4891498E-01  -.1673927E-01   .4759927E-01
   .1026700E+00   .1139569E+00   .8961683E-01   .6029189E-01   .4058902E-01
   .2661319E-01   .1533509E-01   .7174006E-02   .9377013E-03  -.6424276E-03
   .9666576E-02   .2726252E-01   .2833868E-01  -.3744772E-02  -.4911063E-01
  -.6796709E-01  -.4797785E-01  -.1624151E-01  -.1788855E-02  -.6412476E-02
  -.1843386E-01  -.3329921E-01  -.4776277E-01  -.5143968E-01  -.3895800E-01
  -.1947131E-01  -.3862372E-02   .7506509E-02   .1785749E-01   .2459807E-01
   .2375205E-01   .1912820E-01   .2074443E-01   .3489244E-01   .5985236E-01
   .8963253E-01   .1163952E+00   .1297642E+00   .1204325E+00   .8851212E-01
   .4726182E-01   .1564008E-01   .5042750E-02   .1248400E-01   .2661042E-01
   .3929158E-01   .4911037E-01   .5498773E-01   .5164134E-01   .3477998E-01
   .1134951E-01  -.6313121E-03   .1021557E-01   .3355866E-01   .4690854E-01
   .3844615E-01   .1494198E-01  -.8607207E-02  -.1945098E-01  -.1258544E-01
   .6090052E-02   .2398330E-01   .3240813E-01   .3100059E-01   .2243229E-01
   .9101102E-02  -.3952873E-02  -.1020847E-01  -.7832807E-02  -.4568588E-03
   .7629242E-02   .1316868E-01   .1248885E-01   .2543633E-02  -.1592791E-01
  -.3834282E-01  -.5875351E-01  -.6974064E-01  -.6369500E-01  -.3909122E-01
  -.1888389E-02   .4130318E-01   .8592286E-01   .1240305E+00   .1433437E+00
   .1368463E+00   .1111978E+00   .8139469E-01   .5798496E-01   .4299782E-01
   .3518986E-01   .3289789E-01   .3368128E-01   .3534021E-01   .3626892E-01
   .3411391E-01   .2753609E-01   .1914121E-01   .1057946E-01  -.3188220E-02
  -.2603479E-01  -.4938776E-01  -.5805357E-01  -.4740600E-01  -.2721541E-01
  -.8836700E-02   .3395666E-02   .6246368E-02  -.5876049E-02  -.2929094E-01
  -.4653658E-01  -.4480088E-01  -.3164154E-01  -.2226029E-01  -.1845286E-01
  -.1067009E-01   .4311893E-02   .1858727E-01   .2464469E-01   .2358599E-01
   .2193859E-01   .2476233E-01   .3290455E-01   .4566934E-01   .6277369E-01
   .8125942E-01   .9408196E-01   .9499080E-01   .8451553E-01   .6972227E-01
   .5763314E-01   .5083696E-01   .4945697E-01   .5405050E-01   .6300139E-01
   .6928980E-01   .6306898E-01   .3858530E-01   .6788862E-03  -.3532797E-01
  -.5134057E-01  -.3768200E-01  -.5840181E-03   .3968621E-01   .5913052E-01
   .4560836E-01   .1074623E-01  -.1584311E-01  -.1104180E-01   .2300069E-01
   .6656326E-01   .1014336E+00   .1174877E+00   .1103011E+00   .8246156E-01
   .4476348E-01   .9846690E-02  -.1373678E-01  -.1978695E-01  -.5380306E-02
   .2117333E-01   .4105232E-01   .4113884E-01   .2565257E-01   .6769586E-02
  -.9703900E-02  -.2478275E-01  -.4007572E-01  -.5583427E-01  -.6990765E-01
  -.7658813E-01  -.7093525E-01  -.5541448E-01  -.3882533E-01  -.2627355E-01
  -.1441091E-01  -.4100569E-03   .9221921E-02   .4882375E-02  -.1357433E-01
  -.3667149E-01  -.5435492E-01  -.5993043E-01  -.5028816E-01  -.2919885E-01
  -.8760575E-02  -.2135805E-02  -.1300936E-01  -.3335504E-01  -.4928783E-01
  -.4896960E-01  -.2920240E-01   .2541908E-02   .3367374E-01   .5487353E-01
   .6141182E-01   .5019996E-01   .2221015E-01  -.1327322E-01  -.4321084E-01
  -.6018673E-01  -.6381558E-01  -.5477338E-01  -.3441695E-01  -.1043589E-01
   .6047720E-02   .1090314E-01   .9626011E-02   .8880959E-02   .8505954E-02
   .5396343E-02   .2935180E-02   .5553321E-02   .6787760E-02  -.1729351E-02
  -.1316862E-01  -.1477625E-01  -.9459721E-02  -.1106823E-01  -.2247754E-01
  -.3328972E-01  -.3554501E-01  -.3070640E-01  -.2352444E-01  -.1676384E-01
  -.1263763E-01  -.1397124E-01  -.2260194E-01  -.3682729E-01  -.5115446E-01
  -.5996897E-01  -.6011390E-01  -.5251672E-01  -.4259984E-01  -.3470581E-01
  -.2594846E-01  -.1115631E-01   .7073862E-02   .2022686E-01   .2458083E-01
   .2405013E-01   .2257215E-01   .1936097E-01   .1288947E-01   .5758028E-02
   .2285377E-02   .1998595E-02  -.7161179E-03  -.9549690E-02  -.2227570E-01
  -.3472718E-01  -.4490650E-01  -.5141540E-01  -.5233814E-01  -.4729869E-01
  -.3922368E-01  -.3360941E-01  -.3546850E-01  -.4485877E-01  -.5638051E-01
  -.6517803E-01  -.7100785E-01  -.7536872E-01  -.7728918E-01  -.7434486E-01
  -.6652330E-01  -.5611519E-01  -.4420435E-01  -.3087348E-01  -.1861031E-01
  -.1252805E-01  -.1569479E-01  -.2623708E-01  -.3878004E-01  -.4710921E-01
  -.4654845E-01  -.3674765E-01  -.2287362E-01  -.1165803E-01  -.5416184E-02
  -.1771077E-02   .1621102E-02   .4889623E-02   .8130474E-02   .1159238E-01
   .1320093E-01   .9538814E-02   .4584993E-03  -.1083349E-01  -.2274544E-01
  -.3525116E-01  -.4512913E-01  -.4828861E-01  -.4789251E-01  -.5124257E-01
  -.5734412E-01  -.5790844E-01  -.5095932E-01  -.4350039E-01  -.4081630E-01
  -.4126288E-01  -.4024957E-01  -.3411450E-01  -.2387612E-01  -.1633966E-01
  -.1717879E-01  -.2283415E-01  -.2289611E-01  -.1071436E-01   .1055532E-01
   .3278342E-01   .4997120E-01   .5961527E-01   .5970207E-01   .4929690E-01
   .3246259E-01   .1737099E-01   .1011897E-01   .1096211E-01   .1656842E-01
   .2330527E-01   .2847637E-01   .3110769E-01   .3210029E-01   .3237621E-01
   .3198407E-01   .3093639E-01   .2916994E-01   .2595298E-01   .2210430E-01
   .2184623E-01   .2913149E-01   .4130666E-01   .4919349E-01   .4564954E-01
   .3219116E-01   .1692809E-01   .7796974E-02   .8420353E-02   .1749140E-01
   .2964341E-01   .3762413E-01   .3607774E-01   .2442913E-01   .6970241E-02
  -.8917489E-02  -.1686468E-01  -.1591281E-01  -.9974405E-02  -.3670753E-02
   .8394393E-03   .4324139E-02   .8930024E-02   .1518922E-01   .1988894E-01
   .1888136E-01   .1110533E-01  -.1623874E-02  -.1680443E-01  -.3125039E-01
  -.4191159E-01  -.4803914E-01  -.5061033E-01  -.5083325E-01  -.4997620E-01
  -.4896902E-01  -.4741875E-01  -.4385762E-01  -.3757650E-01  -.3023416E-01
  -.2498721E-01  -.2387926E-01  -.2622553E-01  -.2969800E-01  -.3215761E-01
  -.3215697E-01  -.2930599E-01  -.2540489E-01  -.2311454E-01  -.2333838E-01
  -.2485318E-01  -.2603941E-01  -.2613029E-01  -.2536237E-01  -.2418134E-01
  -.2263384E-01  -.2100706E-01  -.2019881E-01  -.2051226E-01  -.2081823E-01
  -.1968053E-01  -.1704039E-01  -.1434292E-01  -.1317468E-01  -.1418459E-01
  -.1615816E-01  -.1602994E-01  -.1137229E-01  -.2808400E-02   .6098641E-02
   .1119487E-01   .9912231E-02   .1962171E-02  -.1014788E-01  -.2166509E-01
  -.2796314E-01  -.2709419E-01  -.2081405E-01  -.1286962E-01  -.5678607E-02
   .1119881E-02   .9039489E-02   .1892895E-01   .3023875E-01   .4074053E-01
   .4716089E-01   .4718242E-01   .4053702E-01   .2862367E-01   .1395209E-01
  -.2960989E-03  -.1131371E-01  -.1812769E-01  -.2098241E-01  -.1979893E-01
  -.1447625E-01  -.6457721E-02   .1381557E-02   .7132969E-02   .1108991E-01
   .1451406E-01   .1747567E-01   .1782381E-01   .1310882E-01   .3594881E-02
  -.6786157E-02  -.1321831E-01  -.1328206E-01  -.7520547E-02   .2048979E-02
   .1259379E-01   .1962678E-01   .1837805E-01   .7351039E-02  -.8940922E-02
  -.2236334E-01  -.2780478E-01  -.2621875E-01  -.2102525E-01  -.1425575E-01
  -.6980256E-02  -.8344865E-03   .2419069E-02   .2536631E-02   .6955282E-03
  -.1656646E-02  -.2546658E-02   .1404293E-03   .6411137E-02   .1337997E-01
   .1817768E-01   .2033576E-01   .2043463E-01   .1843866E-01   .1447418E-01
   .1011632E-01   .7301744E-02   .6386723E-02   .7149553E-02   .1041878E-01
   .1583583E-01   .2002425E-01   .1967102E-01   .1530391E-01   .1028197E-01
   .7049102E-02   .6017086E-02   .6901340E-02   .8388195E-02   .8373871E-02
   .6044525E-02   .2328399E-02  -.2281732E-02  -.9149152E-02  -.1887940E-01
  -.2874074E-01  -.3437401E-01  -.3348634E-01  -.2762941E-01  -.2014039E-01
  -.1383460E-01  -.9855088E-02  -.7495694E-02  -.5252324E-02  -.2564192E-02
  -.3559587E-03  -.1852724E-03  -.2906706E-02  -.7827419E-02  -.1368895E-01
  -.1922672E-01  -.2278936E-01  -.2322122E-01  -.2061115E-01  -.1604160E-01
  -.1104993E-01  -.6862595E-02  -.3892001E-02  -.1536426E-02   .8547987E-03
   .2417190E-02   .1118600E-02  -.3903163E-02  -.1173669E-01  -.2110060E-01
  -.3069940E-01  -.3842182E-01  -.4196146E-01  -.4112103E-01  -.3790181E-01
  -.3430793E-01  -.3059627E-01  -.2588520E-01  -.1948097E-01  -.1163504E-01
  -.4029611E-02   .4612607E-03  -.1127361E-03  -.5088878E-02  -.1175474E-01
  -.1729225E-01  -.2036939E-01  -.2102178E-01  -.2007553E-01  -.1872688E-01
  -.1864323E-01  -.2148914E-01  -.2728318E-01  -.3336921E-01  -.3624808E-01
  -.3442748E-01  -.2890197E-01  -.2144829E-01  -.1366582E-01  -.7105022E-02
  -.2496759E-02   .1018018E-02   .4397670E-02   .6931947E-02   .7204633E-02
   .4944576E-02   .1106030E-02  -.2792061E-02  -.4813542E-02  -.3378923E-02
   .1713784E-02   .9148697E-02   .1643918E-01   .2072927E-01   .2032569E-01
   .1544738E-01   .8014881E-02   .1482448E-02  -.9785724E-03   .1421682E-02
   .7354649E-02   .1488827E-01   .2154957E-01   .2448415E-01   .2299347E-01
   .2024691E-01   .2033172E-01   .2439040E-01   .3023921E-01   .3452739E-01
   .3568134E-01   .3495064E-01   .3400488E-01   .3216995E-01   .2794105E-01
   .2207413E-01   .1737172E-01   .1547275E-01   .1620373E-01   .1858752E-01
   .2124192E-01   .2295430E-01   .2332931E-01   .2247686E-01   .2049278E-01
   .1816596E-01   .1697390E-01   .1730463E-01   .1817805E-01   .1876034E-01
   .1988011E-01   .2286745E-01   .2763064E-01   .3278093E-01   .3706109E-01
   .3994162E-01   .4159026E-01   .4297786E-01   .4489935E-01   .4724148E-01
   .4902749E-01   .4976796E-01   .5004798E-01   .5076929E-01   .5243095E-01
   .5460244E-01   .5601421E-01   .5485686E-01   .4990117E-01   .4205483E-01
   .3406079E-01   .2854470E-01   .2612530E-01   .2535539E-01   .2461385E-01
   .2372532E-01   .2322547E-01   .2173082E-01   .1647500E-01   .7727854E-02
  -.6413022E-03  -.5527608E-02  -.7046424E-02  -.6707036E-02  -.5445156E-02
  -.3841178E-02  -.1975418E-02   .2522731E-03   .2588094E-02   .4581535E-02
   .5984729E-02   .6371829E-02   .4730473E-02   .1021922E-02  -.2373261E-02
  -.2473655E-02   .1283069E-02   .7172403E-02   .1317755E-01   .1750470E-01
   .1884061E-01   .1785130E-01   .1688760E-01   .1759517E-01   .1953705E-01
   .2116856E-01   .2153099E-01   .2050920E-01   .1821152E-01   .1545579E-01
   .1432582E-01   .1640773E-01   .2075090E-01   .2458546E-01   .2624792E-01
   .2573948E-01   .2384488E-01   .2224527E-01   .2328042E-01   .2738042E-01
   .3135973E-01   .3081309E-01   .2403864E-01   .1314703E-01   .2319923E-02
  -.4518223E-02  -.5690072E-02  -.2880315E-02   .2641848E-03   .1093871E-02
  -.9333301E-03  -.5014041E-02  -.1011797E-01  -.1513088E-01  -.1947272E-01
  -.2369605E-01  -.2788648E-01  -.3085384E-01  -.3150282E-01  -.2976682E-01
  -.2644044E-01  -.2322050E-01  -.2208256E-01  -.2357995E-01  -.2649960E-01
  -.2932670E-01  -.3119388E-01  -.3188830E-01  -.3174467E-01  -.3207714E-01
  -.3411119E-01  -.3737717E-01  -.4000805E-01  -.4003601E-01  -.3674474E-01
  -.3069526E-01  -.2381866E-01  -.1916708E-01  -.1837727E-01  -.2033287E-01
  -.2306522E-01  -.2595868E-01  -.2882220E-01  -.3068270E-01  -.3078580E-01
  -.2906675E-01  -.2586833E-01  -.2207042E-01  -.1875947E-01  -.1672196E-01
  -.1546029E-01  -.1308872E-01  -.8553376E-02  -.2872670E-02   .1761701E-02
   .3893546E-02   .3397655E-02   .1372506E-02  -.2876800E-03  -.2000395E-03
   .1656668E-02   .4024385E-02   .5317838E-02   .4624663E-02   .2577832E-02
   .4361601E-03  -.9204118E-03  -.1440706E-02  -.1848375E-02  -.2534801E-02
  -.3194698E-02  -.3373338E-02  -.3201657E-02  -.3177175E-02  -.3770876E-02
  -.5362481E-02  -.8176479E-02  -.1161767E-01  -.1440439E-01  -.1622272E-01
  -.1789743E-01  -.1974228E-01  -.2085380E-01  -.2077045E-01  -.2034573E-01
  -.2023055E-01  -.2008744E-01  -.1971947E-01  -.1954691E-01  -.1968643E-01
  -.1912230E-01  -.1687708E-01  -.1351448E-01  -.1069898E-01  -.9983744E-02
  -.1157478E-01  -.1369609E-01  -.1420933E-01  -.1272665E-01  -.1000522E-01
  -.6662833E-02  -.3288253E-02  -.9586567E-03  -.6280950E-03  -.2332169E-02
  -.5361434E-02  -.8531533E-02  -.1062501E-01  -.1155286E-01  -.1253561E-01
  -.1425506E-01  -.1571864E-01  -.1555307E-01  -.1405270E-01  -.1303111E-01
  -.1392713E-01  -.1642096E-01  -.1895574E-01  -.1992941E-01  -.1847339E-01
  -.1468304E-01  -.9934915E-02  -.6426521E-02  -.5250248E-02  -.5820774E-02
  -.7225636E-02  -.9326859E-02  -.1166114E-01  -.1317537E-01  -.1417768E-01
  -.1604678E-01  -.1887978E-01  -.2091888E-01  -.2098220E-01  -.1919345E-01
  -.1593109E-01  -.1171203E-01  -.7941498E-02  -.6286397E-02  -.6702684E-02
  -.7881320E-02  -.9005051E-02  -.1013714E-01  -.1102701E-01  -.1079928E-01
  -.9087445E-02  -.6409396E-02  -.3193245E-02   .6052465E-04   .2491209E-02
   .3711432E-02   .4488670E-02   .6351476E-02   .1024478E-01   .1585053E-01
   .2194554E-01   .2725590E-01   .3103776E-01   .3353539E-01   .3561032E-01
   .3781330E-01   .3996126E-01   .4153504E-01   .4267398E-01   .4380261E-01
   .4498241E-01   .4559250E-01   .4501122E-01   .4348823E-01   .4207290E-01
   .4216731E-01   .4437058E-01   .4736032E-01   .4830616E-01   .4497022E-01
   .3769342E-01   .2925635E-01   .2322337E-01   .2191807E-01   .2512233E-01
   .2993969E-01   .3258636E-01   .3112988E-01   .2659934E-01   .2148982E-01
   .1754162E-01   .1565381E-01   .1633615E-01   .1910430E-01   .2186015E-01
   .2235692E-01   .2026709E-01   .1689461E-01   .1379357E-01   .1202854E-01
   .1178433E-01   .1192352E-01   .1061388E-01   .7302500E-02   .3544462E-02
   .1256628E-02   .1089510E-02   .2846435E-02   .6212856E-02   .1061239E-01
   .1499728E-01   .1834807E-01   .2064172E-01   .2257832E-01   .2438682E-01
   .2541372E-01   .2472912E-01   .2168297E-01   .1729753E-01   .1468368E-01
   .1632397E-01   .2173066E-01   .2858129E-01   .3500237E-01   .4012154E-01
   .4348096E-01   .4471272E-01   .4353829E-01   .4042573E-01   .3673752E-01
   .3385167E-01   .3215806E-01   .3046634E-01   .2751992E-01   .2381427E-01
   .2075680E-01   .1939361E-01   .1997049E-01   .2183073E-01   .2361898E-01
   .2376432E-01   .2158822E-01   .1806772E-01   .1491467E-01   .1289916E-01
   .1137481E-01   .9231894E-02   .6800259E-02   .5799160E-02   .7317741E-02
   .1081795E-01   .1460451E-01   .1662749E-01   .1565062E-01   .1192723E-01
   .7492395E-02   .4981308E-02   .5342602E-02   .7472638E-02   .9927932E-02
   .1189974E-01   .1331097E-01   .1437199E-01   .1508202E-01   .1534536E-01
   .1500545E-01   .1391739E-01   .1227201E-01   .1040266E-01   .8256761E-02
   .5981667E-02   .4481867E-02   .4242086E-02   .4642926E-02   .4476640E-02
   .2995775E-02   .7544972E-03  -.4994517E-03   .7700848E-03   .3735732E-02
   .6091678E-02   .6801088E-02   .7061600E-02   .8816096E-02   .1286672E-01
   .1831279E-01   .2301929E-01   .2468930E-01   .2254643E-01   .1797107E-01
   .1361672E-01   .1190625E-01   .1383658E-01   .1844758E-01   .2323343E-01
   .2580799E-01   .2563361E-01   .2367689E-01   .2085731E-01   .1786487E-01
   .1558829E-01   .1471546E-01   .1454767E-01   .1310350E-01   .8992638E-02
   .2631662E-02  -.4353644E-02  -.1030111E-01  -.1402306E-01  -.1555277E-01
  -.1664782E-01  -.1902441E-01  -.2246437E-01  -.2547640E-01  -.2714482E-01
  -.2711455E-01  -.2542080E-01  -.2276621E-01  -.2082767E-01  -.2141147E-01
  -.2454341E-01  -.2862686E-01  -.3167139E-01  -.3228649E-01  -.3033596E-01
  -.2697296E-01  -.2403670E-01  -.2283018E-01  -.2347826E-01  -.2531978E-01
  -.2734198E-01  -.2849537E-01  -.2825126E-01  -.2742627E-01  -.2778341E-01
  -.3005989E-01  -.3304386E-01  -.3478748E-01  -.3435701E-01  -.3237411E-01
  -.3015603E-01  -.2827564E-01  -.2659977E-01  -.2502330E-01  -.2383192E-01
  -.2388586E-01  -.2600034E-01  -.2993141E-01  -.3399521E-01  -.3619935E-01
  -.3577439E-01  -.3369816E-01  -.3160185E-01  -.3056178E-01  -.3079107E-01
  -.3149598E-01  -.3127059E-01  -.2907716E-01  -.2502013E-01  -.2028987E-01
  -.1688141E-01  -.1635369E-01  -.1843572E-01  -.2120326E-01  -.2240535E-01
  -.2113877E-01  -.1839868E-01  -.1615789E-01  -.1627745E-01  -.1886673E-01
  -.2207044E-01  -.2366192E-01  -.2257603E-01  -.1956081E-01  -.1685019E-01
  -.1608141E-01  -.1729315E-01  -.1933270E-01  -.2049192E-01  -.1974406E-01
  -.1740530E-01  -.1442925E-01  -.1227057E-01  -.1182478E-01  -.1212334E-01
  -.1173221E-01  -.1077604E-01  -.1089924E-01  -.1310808E-01  -.1647587E-01
  -.1875089E-01  -.1846435E-01  -.1590787E-01  -.1270253E-01  -.1102577E-01
  -.1284533E-01  -.1887228E-01  -.2811364E-01  -.3832961E-01  -.4653085E-01
  -.5061076E-01  -.5087783E-01  -.4922961E-01  -.4720180E-01  -.4503429E-01
  -.4249883E-01  -.3982845E-01  -.3788207E-01  -.3727382E-01  -.3833727E-01
  -.4103482E-01  -.4492367E-01  -.4952103E-01  -.5426265E-01  -.5812160E-01
  -.5962807E-01  -.5772757E-01  -.5246908E-01  -.4531991E-01  -.3861197E-01
  -.3404051E-01  -.3191224E-01  -.3161830E-01  -.3170479E-01  -.3089662E-01
  -.2933511E-01  -.2821649E-01  -.2815804E-01  -.2847970E-01  -.2781089E-01
  -.2544922E-01  -.2193055E-01  -.1853755E-01  -.1652546E-01  -.1640038E-01
  -.1730533E-01  -.1789620E-01  -.1762052E-01  -.1704056E-01  -.1725088E-01
  -.1886676E-01  -.2175573E-01  -.2465422E-01  -.2545952E-01  -.2261808E-01
  -.1613362E-01  -.7493921E-02   .1292234E-02   .8464114E-02   .1252957E-01
   .1291971E-01   .1072930E-01   .7996866E-02   .6198320E-02   .5325148E-02
   .4527359E-02   .3169719E-02   .9517937E-03  -.1790448E-02  -.3927695E-02
  -.4416234E-02  -.3220838E-02  -.1035824E-02   .1515900E-02   .4233772E-02
   .7130960E-02   .9844905E-02   .1129828E-01   .1035786E-01   .6827045E-02
   .2049181E-02  -.2144269E-02  -.4468095E-02  -.4408005E-02  -.2392073E-02
   .5044726E-03   .3207710E-02   .4975816E-02   .5267851E-02   .4255185E-02
   .2594416E-02   .5097380E-03  -.2205149E-02  -.5813366E-02  -.1014277E-01
  -.1429934E-01  -.1735240E-01  -.1928028E-01  -.2065481E-01  -.2152312E-01
  -.2091009E-01  -.1801609E-01  -.1347454E-01  -.8988484E-02  -.6423401E-02
  -.6491737E-02  -.7881779E-02  -.8542679E-02  -.7718519E-02  -.6422490E-02
  -.6298094E-02  -.8402292E-02  -.1214786E-01  -.1556952E-01  -.1676034E-01
  -.1509830E-01  -.1155642E-01  -.7777210E-02  -.4861416E-02  -.3142725E-02
  -.2692357E-02  -.3268385E-02  -.4166009E-02  -.4784615E-02  -.5116063E-02
  -.5678137E-02  -.6729658E-02  -.7884563E-02  -.8836090E-02  -.9187273E-02
  -.8039461E-02  -.4811277E-02  -.3977202E-03   .3352326E-02   .5165523E-02
   .5170581E-02   .4196254E-02   .2644183E-02   .5668635E-03  -.1614537E-02
  -.3458922E-02  -.5071361E-02  -.6589119E-02  -.7185875E-02  -.5705133E-02
  -.1807727E-02   .3199135E-02   .7036506E-02   .7903556E-02   .5482058E-02
   .8227848E-03  -.4368758E-02  -.7564557E-02  -.6645092E-02  -.2252101E-02
   .2095046E-02   .3480912E-02   .1992121E-02   .1225423E-03   .2800586E-03
   .2981272E-02   .6620286E-02   .8330300E-02   .6178565E-02   .2491857E-03
  -.7768023E-02  -.1559647E-01  -.2108254E-01  -.2308162E-01  -.2207964E-01
  -.1968793E-01  -.1702193E-01  -.1406127E-01  -.1042290E-01  -.6112574E-02
  -.1500074E-02   .2908558E-02   .6198837E-02   .7166452E-02   .5657625E-02
   .2902288E-02   .3661758E-03  -.8313513E-03   .2889460E-03   .4136045E-02
   .9991704E-02   .1672408E-01   .2437695E-01   .3332845E-01   .4186897E-01
   .4666347E-01   .4638249E-01   .4280774E-01   .3843421E-01   .3437861E-01
   .3048790E-01   .2675857E-01   .2376648E-01   .2192122E-01   .2126289E-01
   .2164609E-01   .2315425E-01   .2583228E-01   .2914567E-01   .3200409E-01
   .3336970E-01   .3270246E-01   .3028486E-01   .2690835E-01   .2291099E-01
   .1832920E-01   .1384375E-01   .1082730E-01   .1023017E-01   .1170021E-01
   .1414386E-01   .1700817E-01   .2019274E-01   .2341510E-01   .2585898E-01
   .2682097E-01   .2630920E-01   .2473535E-01   .2227393E-01   .1949427E-01
   .1743383E-01   .1694419E-01   .1810075E-01   .1991029E-01   .2119778E-01
   .2140139E-01   .2073456E-01   .1997924E-01   .1991201E-01   .2106632E-01
   .2284327E-01   .2360086E-01   .2240396E-01   .1994109E-01   .1808669E-01
   .1840321E-01   .2062455E-01   .2313091E-01   .2454403E-01   .2450338E-01
   .2375735E-01   .2331740E-01   .2384690E-01   .2519638E-01   .2613321E-01
   .2558543E-01   .2376390E-01   .2146685E-01   .1895352E-01   .1614369E-01
   .1353241E-01   .1168609E-01   .1079739E-01   .1063465E-01   .1081628E-01
   .1136911E-01   .1231634E-01   .1279777E-01   .1152468E-01   .8202877E-02
   .4214053E-02   .1658805E-02   .1880843E-02   .5435682E-02   .1179405E-01
   .1929896E-01   .2547114E-01   .2863587E-01   .2903595E-01   .2786275E-01
   .2598745E-01   .2392286E-01   .2209587E-01   .2054428E-01   .1909139E-01
   .1780935E-01   .1735085E-01   .1848926E-01   .2086005E-01   .2280214E-01
   .2263636E-01   .2039658E-01   .1807825E-01   .1742252E-01   .1820756E-01
   .1887883E-01   .1800962E-01   .1489816E-01   .1027378E-01   .6306257E-02
   .4986806E-02   .6390300E-02   .8901567E-02   .1099629E-01   .1219498E-01
   .1262616E-01   .1278877E-01   .1341680E-01   .1497447E-01   .1701297E-01
   .1835102E-01   .1889095E-01   .1978269E-01   .2207074E-01   .2544942E-01
   .2804913E-01   .2799076E-01   .2506670E-01   .2100683E-01   .1812851E-01
   .1772817E-01   .1993532E-01   .2367058E-01   .2704993E-01   .2857406E-01
   .2794079E-01   .2575034E-01   .2249225E-01   .1799609E-01   .1224288E-01
   .6435179E-02   .2071155E-02  -.1129203E-03  -.6746294E-03  -.1287911E-02
  -.3284855E-02  -.6607756E-02  -.9756734E-02  -.1110077E-01  -.1036346E-01
  -.8718862E-02  -.7662796E-02  -.7812286E-02  -.8658119E-02  -.9372278E-02
  -.9701543E-02  -.1018408E-01  -.1145170E-01  -.1313462E-01  -.1414277E-01
  -.1407617E-01  -.1325526E-01  -.1208699E-01  -.1047989E-01  -.7933519E-02
  -.4242445E-02  -.5545464E-03   .9437351E-03  -.8874345E-03  -.5261455E-02
  -.9895962E-02  -.1233255E-01  -.1170588E-01  -.9127359E-02  -.6910480E-02
  -.6646355E-02  -.8018143E-02  -.9370982E-02  -.9533091E-02  -.8591874E-02
  -.7522796E-02  -.7173545E-02  -.7369190E-02  -.7460113E-02  -.7667988E-02
  -.9083548E-02  -.1224291E-01  -.1612793E-01  -.1909724E-01  -.2054858E-01
  -.2122348E-01  -.2224853E-01  -.2368518E-01  -.2443379E-01  -.2360150E-01
  -.2135437E-01  -.1896985E-01  -.1836354E-01  -.2036878E-01  -.2383889E-01
  -.2648745E-01  -.2693717E-01  -.2540861E-01  -.2277094E-01  -.1997674E-01
  -.1735078E-01  -.1450233E-01  -.1081686E-01  -.6249482E-02  -.1505079E-02
   .2715763E-02   .5936925E-02   .7605623E-02   .6675782E-02   .2759851E-02
  -.2790947E-02  -.7646012E-02  -.9903247E-02  -.8958791E-02  -.5402056E-02
  -.3954078E-03   .4531058E-02   .7750359E-02   .8624864E-02   .7383643E-02
   .4641920E-02   .1125745E-02  -.2460725E-02  -.5527877E-02  -.7853702E-02
  -.9619133E-02  -.1092622E-01  -.1190959E-01  -.1260937E-01  -.1272733E-01
  -.1185117E-01  -.9788356E-02  -.6978915E-02  -.4735596E-02  -.4483641E-02
  -.6661716E-02  -.1051446E-01  -.1440895E-01  -.1701615E-01  -.1773394E-01
  -.1646565E-01  -.1368108E-01  -.1028676E-01  -.7606387E-02  -.6661212E-02
  -.7441604E-02  -.9391914E-02  -.1174959E-01  -.1362163E-01  -.1456761E-01
  -.1518767E-01  -.1604266E-01  -.1700547E-01  -.1764418E-01  -.1777404E-01
  -.1742820E-01  -.1686955E-01  -.1680172E-01  -.1826926E-01  -.2171969E-01
  -.2600396E-01  -.2852355E-01  -.2691408E-01  -.2136075E-01  -.1460951E-01
  -.1001104E-01  -.9295433E-02  -.1160845E-01  -.1466648E-01  -.1656688E-01
  -.1697250E-01  -.1662642E-01  -.1640752E-01  -.1684834E-01  -.1843126E-01
  -.2131943E-01  -.2464409E-01  -.2709697E-01  -.2781194E-01  -.2653185E-01
  -.2409094E-01  -.2195316E-01  -.2097630E-01  -.2098730E-01  -.2137468E-01
  -.2180873E-01  -.2233985E-01  -.2306167E-01  -.2369528E-01  -.2381106E-01
  -.2313098E-01  -.2147733E-01  -.1874718E-01  -.1552320E-01  -.1281840E-01
  -.1136810E-01  -.1149560E-01  -.1331577E-01  -.1637924E-01  -.1920717E-01
  -.2028095E-01  -.1912463E-01  -.1662732E-01  -.1452567E-01  -.1370767E-01
  -.1365816E-01  -.1297180E-01  -.1057367E-01  -.6787976E-02  -.2782255E-02
   .4104954E-03   .1992904E-02   .1573248E-02  -.5160008E-03  -.3704837E-02
  -.7245580E-02  -.1019726E-01  -.1185344E-01  -.1214897E-01  -.1162959E-01
  -.1072135E-01  -.9768362E-02  -.9338114E-02  -.1001904E-01  -.1158008E-01
  -.1325577E-01  -.1443860E-01  -.1514435E-01  -.1551756E-01  -.1602453E-01
  -.1730878E-01  -.1902268E-01  -.1995092E-01  -.1899335E-01  -.1633712E-01
  -.1305312E-01  -.1031892E-01  -.8956588E-02  -.9129408E-02  -.1044784E-01
  -.1221790E-01  -.1378886E-01  -.1473877E-01  -.1462379E-01  -.1280109E-01
  -.9109331E-02  -.4208943E-02   .4941409E-03   .3738310E-02   .5273305E-02
   .5934326E-02   .6652139E-02   .7272933E-02   .6835404E-02   .4731998E-02
   .1767978E-02  -.1899289E-03  -.1474275E-03   .1329979E-02   .3276650E-02
   .5415427E-02   .8175365E-02   .1125616E-01   .1307153E-01   .1246376E-01
   .1041816E-01   .9040394E-02   .9110859E-02   .9214032E-02   .7686158E-02
   .4982067E-02   .4004357E-02   .6918910E-02   .1243050E-01   .1761066E-01
   .2098653E-01   .2285461E-01   .2331645E-01   .2221019E-01   .2019414E-01
   .1915465E-01   .2073320E-01   .2340326E-01   .2330862E-01   .1896210E-01
   .1364572E-01   .1141981E-01   .1311460E-01   .1715283E-01   .2077085E-01
   .2095209E-01   .1668428E-01   .1059383E-01   .6946308E-02   .7378839E-02
   .9494347E-02   .1059033E-01   .1150101E-01   .1472375E-01   .1966866E-01
   .2247161E-01   .2092006E-01   .1693673E-01   .1361145E-01   .1166481E-01
   .9914676E-02   .7643017E-02   .5396381E-02   .4179765E-02   .4619102E-02
   .6545135E-02   .9165650E-02   .1132264E-01   .1216143E-01   .1109507E-01
   .8285778E-02   .5412521E-02   .4358532E-02   .5239588E-02   .6011899E-02
   .4694609E-02   .1913409E-02   .7531719E-03   .3295765E-02   .8156732E-02
   .1215378E-01   .1372716E-01   .1370694E-01   .1321613E-01   .1256171E-01
   .1195649E-01   .1195704E-01   .1280631E-01   .1365867E-01   .1353115E-01
   .1283847E-01   .1319085E-01   .1538824E-01   .1856923E-01   .2119097E-01
   .2223656E-01   .2164361E-01   .2020845E-01   .1943042E-01   .2048243E-01
   .2299807E-01   .2524960E-01   .2553690E-01   .2332011E-01   .1956891E-01
   .1590370E-01   .1360692E-01   .1308805E-01   .1362875E-01   .1379137E-01
   .1297215E-01   .1219072E-01   .1325398E-01   .1659209E-01   .1989665E-01
   .2018489E-01   .1684384E-01   .1235341E-01   .9655035E-02   .9372987E-02
   .9884536E-02   .9901613E-02   .9932466E-02   .1134565E-01   .1437639E-01
   .1705152E-01   .1699183E-01   .1391142E-01   .9490001E-02   .5180629E-02
   .1214840E-02  -.2364832E-02  -.4911605E-02  -.5580504E-02  -.4186361E-02
  -.1637103E-02   .5148596E-05  -.1089906E-02  -.4781784E-02  -.9043803E-02
  -.1194718E-01  -.1282472E-01  -.1138411E-01  -.7104511E-02  -.4905006E-03
   .6299702E-02   .1098682E-01   .1246591E-01   .1089367E-01   .7249171E-02
   .3512846E-02   .1414299E-02   .3553575E-03  -.1955947E-02  -.5941319E-02
  -.8646923E-02  -.6900838E-02  -.6870807E-03   .6777902E-02   .1187294E-01
   .1312766E-01   .1151077E-01   .8890463E-02   .6485585E-02   .4745264E-02
   .3750166E-02   .3840504E-02   .5346819E-02   .7901331E-02   .1011911E-01
   .1053272E-01   .8804040E-02   .6406040E-02   .5288013E-02   .6163141E-02
   .7933583E-02   .9043102E-02   .8951055E-02   .7937484E-02   .6445763E-02
   .4573297E-02   .2414960E-02   .5456508E-04  -.2189858E-02  -.3478546E-02
  -.3234878E-02  -.1680736E-02   .8508905E-04   .6479608E-03  -.1871595E-03
  -.1019376E-02  -.5586999E-03   .1499994E-02   .4673052E-02   .7696915E-02
   .9019893E-02   .7696657E-02   .4083958E-02  -.4316146E-03  -.4810936E-02
  -.8832357E-02  -.1227077E-01  -.1444255E-01  -.1477512E-01  -.1388754E-01
  -.1300625E-01  -.1291050E-01  -.1363338E-01  -.1496764E-01  -.1686700E-01
  -.1926789E-01  -.2154698E-01  -.2255572E-01  -.2152354E-01  -.1857867E-01
  -.1447840E-01  -.1008650E-01  -.5959897E-02  -.2016204E-02   .1872916E-02
   .4949247E-02   .5807265E-02   .3489413E-02  -.1469026E-02  -.7073167E-02
  -.1169857E-01  -.1489824E-01  -.1670256E-01  -.1687668E-01  -.1489195E-01
  -.1067410E-01  -.4948137E-02   .1007591E-02   .5817546E-02   .8084401E-02
   .6864570E-02   .2839470E-02  -.2013516E-02  -.5963388E-02  -.8610704E-02
  -.1012555E-01  -.1048189E-01  -.9763583E-02  -.8413780E-02  -.7723796E-02
  -.8976629E-02  -.1198917E-01  -.1505179E-01  -.1618438E-01  -.1452061E-01
  -.1091242E-01  -.7155419E-02  -.4434535E-02  -.2861573E-02  -.2392433E-02
  -.3050722E-02  -.4875019E-02  -.7059883E-02  -.8317408E-02  -.8155696E-02
  -.6708957E-02  -.4815784E-02  -.3782752E-02  -.4259279E-02  -.5659315E-02
  -.6637083E-02  -.6365973E-02  -.5067224E-02  -.3786489E-02  -.3626310E-02
  -.4864345E-02  -.6791557E-02  -.8212711E-02  -.8000044E-02  -.5686261E-02
  -.2119828E-02   .1079269E-02   .2979537E-02   .4150338E-02   .5851609E-02
   .8894081E-02   .1298281E-01   .1695809E-01   .1960005E-01   .1979455E-01
   .1741740E-01   .1377909E-01   .1065088E-01   .8868882E-02   .7960755E-02
   .6704496E-02   .4482224E-02   .2146261E-02   .7383466E-03   .2294747E-03
  -.1553630E-03  -.8618012E-03  -.1722721E-02  -.2463436E-02  -.2742420E-02
  -.2368012E-02  -.1987151E-02  -.3069634E-02  -.6388179E-02  -.1109641E-01
  -.1513735E-01  -.1678853E-01  -.1575095E-01  -.1281327E-01  -.9369187E-02
  -.6698771E-02  -.5316911E-02  -.4795434E-02  -.4335288E-02  -.3145016E-02
  -.8808816E-03   .2218234E-02   .5226109E-02   .6867305E-02   .6620426E-02
   .4754302E-02   .2068652E-02  -.6180997E-03  -.3008658E-02  -.4865967E-02
  -.6029934E-02  -.6570509E-02  -.7009509E-02  -.7762981E-02  -.8382997E-02
  -.7769237E-02  -.5233155E-02  -.1599016E-02   .1001521E-02   .4950736E-03
  -.3519651E-02  -.9624722E-02  -.1595258E-01  -.2173787E-01  -.2710432E-01
  -.3131464E-01  -.3287773E-01  -.3050483E-01  -.2414568E-01  -.1550242E-01
  -.6969044E-02  -.5424029E-03   .2996725E-02   .4226425E-02   .4574346E-02
   .5008661E-02   .4988045E-02   .3174452E-02  -.8763009E-03  -.5852957E-02
  -.9597213E-02  -.1042686E-01  -.7496333E-02  -.1182263E-02   .6996889E-02
   .1474373E-01   .1990871E-01   .2127013E-01   .1846870E-01   .1254166E-01
   .5717273E-02  -.1041012E-03  -.4118550E-02  -.6369230E-02  -.6693589E-02
  -.4430555E-02   .6422191E-03   .7191266E-02   .1272372E-01   .1519424E-01
   .1401908E-01   .1054564E-01   .7054536E-02   .5274563E-02   .5331981E-02
   .5898759E-02   .5436962E-02   .3612266E-02   .1623539E-02   .1297496E-02
   .3552996E-02   .7298699E-02   .1033336E-01   .1086663E-01   .8861155E-02
   .6337076E-02   .5653974E-02   .7635634E-02   .1111528E-01   .1406899E-01
   .1505129E-01   .1362910E-01   .9979738E-02   .5059280E-02   .1068505E-02
   .2115130E-03   .2786913E-02   .7086528E-02   .1051484E-01   .1133933E-01
   .9936699E-02   .7825178E-02   .6034574E-02   .4514566E-02   .2720905E-02
   .7268676E-03  -.8939403E-03  -.1680353E-02  -.1526235E-02  -.8688401E-03
  -.4602727E-03  -.7398131E-03  -.1467494E-02  -.1869757E-02  -.1502218E-02
  -.2280083E-04   .3147225E-02   .7991809E-02   .1357345E-01   .1795455E-01
   .1968222E-01   .1895343E-01   .1727141E-01   .1610911E-01   .1595128E-01
   .1655042E-01   .1759325E-01   .1875986E-01   .1931015E-01   .1890511E-01
   .1857109E-01   .2044277E-01   .2568766E-01   .3230333E-01   .3627820E-01
   .3486611E-01   .2832724E-01   .1914379E-01   .1012595E-01   .3072729E-02
  -.1818302E-02  -.5397877E-02  -.8560297E-02  -.1137508E-01  -.1327756E-01
  -.1368266E-01  -.1271676E-01  -.1107204E-01  -.9065056E-02  -.7026618E-02
  -.6011937E-02  -.8045437E-02  -.1529732E-01  -.2733569E-01  -.3947160E-01
  -.4504422E-01  -.4063731E-01  -.2936525E-01  -.1820144E-01  -.1225294E-01
  -.1157811E-01  -.1308593E-01  -.1444019E-01  -.1515842E-01  -.1530697E-01
  -.1418381E-01  -.1095202E-01  -.6266495E-02  -.2674079E-02  -.2544851E-02
  -.5578411E-02  -.8769835E-02  -.9400694E-02  -.7752386E-02  -.5946829E-02
  -.4962808E-02  -.4082771E-02  -.3081292E-02  -.3077136E-02  -.4636992E-02
  -.6358143E-02  -.5504706E-02  -.8282032E-03   .5302796E-02   .8263763E-02
   .6079981E-02   .2265471E-02   .1947395E-02   .6037140E-02   .1050593E-01
   .1104224E-01   .7370122E-02   .2668566E-02  -.4512817E-03  -.1609184E-02
  -.1213937E-02   .6144291E-03   .2830532E-02   .3534190E-02   .1550186E-02
  -.2331917E-02  -.6073517E-02  -.8870922E-02  -.1173192E-01  -.1576788E-01
  -.2084096E-01  -.2614224E-01  -.3125915E-01  -.3595318E-01  -.3950207E-01
  -.4044267E-01  -.3770207E-01  -.3200370E-01  -.2565480E-01  -.2066208E-01
  -.1731211E-01  -.1474041E-01  -.1252879E-01  -.1105328E-01  -.1085106E-01
  -.1205125E-01  -.1393763E-01  -.1524019E-01  -.1487025E-01  -.1254178E-01
  -.8225184E-02  -.2040456E-02   .5051172E-02   .1141531E-01   .1592241E-01
   .1772532E-01   .1501096E-01   .6591786E-02  -.4402752E-02  -.1151662E-01
  -.1129084E-01  -.5822180E-02   .1187588E-03   .3909859E-02   .7094049E-02
   .1150281E-01   .1393176E-01   .8638538E-02  -.4131256E-02  -.1546334E-01
  -.1610192E-01  -.5814041E-02   .6570642E-02   .1216559E-01   .1084424E-01
   .9527049E-02   .1204917E-01   .1505070E-01   .1422987E-01   .9582391E-02
   .3363992E-02  -.2703473E-02  -.7169931E-02  -.9115209E-02  -.9299122E-02
  -.9311599E-02  -.9094756E-02  -.7496605E-02  -.5200769E-02  -.4937867E-02
  -.8512054E-02  -.1395448E-01  -.1747849E-01  -.1755944E-01  -.1570835E-01
  -.1406564E-01  -.1309122E-01  -.1176473E-01  -.8925969E-02  -.4490481E-02
   .3417557E-03   .3825217E-02   .5163504E-02   .4694047E-02   .3307472E-02
   .2472270E-02   .3841031E-02   .7944711E-02   .1247896E-01   .1323786E-01
   .8369475E-02   .1039265E-02  -.3185062E-02  -.1488483E-02   .3973377E-02
   .8673749E-02   .9934112E-02   .8330612E-02   .5904232E-02   .4051709E-02
   .2589223E-02   .3346767E-03  -.3934715E-02  -.9980623E-02  -.1518060E-01
  -.1651111E-01  -.1292433E-01  -.5791262E-02   .2164574E-02   .8919140E-02
   .1444204E-01   .1951246E-01   .2321256E-01   .2253524E-01   .1602397E-01
   .7264717E-02   .2980389E-02   .6547335E-02   .1401174E-01   .1821742E-01
   .1634889E-01   .1203458E-01   .9875127E-02   .9950119E-02   .8617711E-02
   .4169338E-02  -.9666930E-03  -.4095593E-02  -.5944605E-02  -.8800495E-02
  -.1258785E-01  -.1426666E-01  -.1162709E-01  -.6696237E-02  -.3145463E-02
  -.1792749E-02  -.7710352E-03   .1309646E-02   .3907484E-02   .6174681E-02
   .8399323E-02   .1008070E-01   .8777415E-02   .3321294E-02  -.2874097E-02
  -.4610593E-02  -.7472056E-03   .5283973E-02   .9481203E-02   .1005696E-01
   .7067538E-02   .1651377E-02  -.4411839E-02  -.9535375E-02  -.1195721E-01
  -.1031720E-01  -.5543823E-02  -.1124667E-02  -.3541295E-03  -.2889890E-02
  -.4650151E-02  -.2237582E-02   .3371148E-02   .8170903E-02   .9105618E-02
   .6401481E-02   .3246546E-02   .3366879E-02   .7578839E-02   .1222843E-01
   .1221513E-01   .6634389E-02   .2512224E-03  -.1228150E-02   .3102074E-02
   .8982291E-02   .1183617E-01   .1052074E-01   .7174584E-02   .4606348E-02
   .4307699E-02   .6218571E-02   .9327564E-02   .1265876E-01   .1561607E-01
   .1733343E-01   .1706994E-01   .1529474E-01   .1340360E-01   .1273220E-01
   .1345898E-01   .1468376E-01   .1498317E-01   .1320092E-01   .9528237E-02
   .5596648E-02   .3329003E-02   .3717020E-02   .6541865E-02   .1085105E-01
   .1495342E-01   .1707793E-01   .1673715E-01   .1504744E-01   .1356068E-01
   .1297665E-01   .1221735E-01   .9718859E-02   .5651988E-02   .1975205E-02
   .3392924E-03   .6134825E-03   .1013782E-02  -.3754460E-03  -.3700473E-02
  -.7455197E-02  -.9896147E-02  -.9929434E-02  -.8139606E-02  -.6132255E-02
  -.5119235E-02  -.5159902E-02  -.5204256E-02  -.4629892E-02  -.3902601E-02
  -.3774740E-02  -.4249690E-02  -.4808298E-02  -.5285991E-02  -.6179259E-02
  -.7715759E-02  -.8899908E-02  -.7837275E-02  -.3582099E-02   .2398430E-02
   .7482544E-02   .1046174E-01   .1186451E-01   .1213963E-01   .1087832E-01
   .7860665E-02   .3737401E-02  -.2511419E-03  -.3201980E-02  -.4608081E-02
  -.4311255E-02  -.2945212E-02  -.1259926E-02   .5104688E-03   .2456377E-02
   .4838480E-02   .8006778E-02   .1143859E-01   .1409838E-01   .1552907E-01
   .1612907E-01   .1662377E-01   .1730837E-01   .1787769E-01   .1802180E-01
   .1789186E-01   .1816202E-01   .1938927E-01   .2159196E-01   .2423041E-01
   .2624716E-01   .2665278E-01   .2558250E-01   .2443522E-01   .2460532E-01
   .2584540E-01   .2643769E-01   .2451499E-01   .1937348E-01   .1206468E-01
   .5366294E-02   .2038561E-02   .2432808E-02   .4187650E-02   .4391677E-02
   .2367319E-02  -.3022472E-03  -.1424689E-02  -.4659848E-03   .1076657E-02
   .9923107E-03  -.1650769E-02  -.5665356E-02  -.9262972E-02  -.1132413E-01
  -.1147053E-01  -.9803364E-02  -.7021015E-02  -.4313996E-02  -.2363601E-02
  -.6463281E-03   .1605510E-02   .4029099E-02   .5354533E-02   .4540045E-02
   .1858655E-02  -.1589487E-02  -.4748626E-02  -.6881916E-02  -.7828333E-02
  -.8113392E-02  -.7927263E-02  -.6877456E-02  -.5093277E-02  -.3206973E-02
  -.1343792E-02   .9853308E-03   .3771873E-02   .6438157E-02   .8574565E-02
   .1001785E-01   .1059290E-01   .1031358E-01   .9599934E-02   .9373693E-02
   .1011440E-01   .1132261E-01   .1227383E-01   .1258703E-01   .1229824E-01
   .1157792E-01   .1080871E-01   .1035125E-01   .1018485E-01   .1019773E-01
   .1051482E-01   .1138339E-01   .1241809E-01   .1329604E-01   .1423523E-01
   .1562717E-01   .1716006E-01   .1767469E-01   .1611429E-01   .1258770E-01
   .8356074E-02   .4911661E-02   .3263809E-02   .3412711E-02   .4691495E-02
   .5840953E-02   .5319951E-02   .2262407E-02  -.2798906E-02  -.8536351E-02
  -.1389389E-01  -.1809573E-01  -.2079994E-01  -.2216880E-01  -.2256957E-01
  -.2267708E-01  -.2327028E-01  -.2451459E-01  -.2566219E-01  -.2581746E-01
  -.2437114E-01  -.2098494E-01  -.1566073E-01  -.9056360E-02  -.2660471E-02
   .1864900E-02   .3513287E-02   .2346630E-02  -.1114402E-02  -.5828794E-02
  -.1001178E-01  -.1189339E-01  -.1128200E-01  -.9559408E-02  -.7892913E-02
  -.6519773E-02  -.5644914E-02  -.5707370E-02  -.6804449E-02  -.8545339E-02
  -.1017907E-01  -.1081042E-01  -.1000353E-01  -.8306322E-02  -.6843742E-02
  -.6338152E-02  -.6562187E-02  -.6769184E-02  -.6239109E-02  -.4952055E-02
  -.3653327E-02  -.2885489E-02  -.2701572E-02  -.3037232E-02  -.3944229E-02
  -.5354252E-02  -.6741160E-02  -.7526407E-02  -.7662449E-02  -.7535261E-02
  -.7752991E-02  -.8714326E-02  -.9629073E-02  -.9470063E-02  -.8042921E-02
  -.6156035E-02  -.5045384E-02  -.5321520E-02  -.6385352E-02  -.6865417E-02
  -.5766355E-02  -.3217790E-02  -.8810055E-04   .2327153E-02   .2620934E-02
   .1260567E-03  -.4120590E-02  -.7505798E-02  -.7910025E-02  -.5411429E-02
  -.1426198E-02   .2256182E-02   .4234169E-02   .4222431E-02   .3039994E-02
   .1666634E-02   .6382930E-03   .1839751E-04  -.2484903E-03  -.3819833E-03
  -.8936241E-03  -.2091996E-02  -.3637559E-02  -.4963067E-02  -.5893630E-02
  -.6480667E-02  -.6688892E-02  -.6359392E-02  -.5748710E-02  -.5678470E-02
  -.7163349E-02  -.1041570E-01  -.1428801E-01  -.1670919E-01  -.1641024E-01
  -.1398141E-01  -.1130028E-01  -.1043600E-01  -.1190762E-01  -.1440662E-01
  -.1606058E-01  -.1589649E-01  -.1430594E-01  -.1225881E-01  -.1045447E-01
  -.9320847E-02  -.9182969E-02  -.1027513E-01  -.1239939E-01  -.1432372E-01
  -.1450994E-01  -.1259417E-01  -.9895690E-02  -.8260962E-02  -.8432415E-02
  -.9566980E-02  -.1041990E-01  -.1047151E-01  -.1016856E-01  -.1034866E-01
  -.1165490E-01  -.1364899E-01  -.1497685E-01  -.1453441E-01  -.1257874E-01
  -.1038246E-01  -.9017229E-02  -.8781842E-02  -.9051145E-02  -.8923712E-02
  -.8306841E-02  -.7829610E-02  -.8298184E-02  -.9813549E-02  -.1155262E-01
  -.1281419E-01  -.1355273E-01  -.1362466E-01  -.1248912E-01  -.9687519E-02
  -.5417356E-02  -.4339803E-03   .4593762E-02   .9355010E-02   .1377206E-01
   .1763657E-01   .2020335E-01   .2070173E-01   .1921110E-01   .1670520E-01
   .1468341E-01   .1434495E-01   .1550144E-01   .1703316E-01   .1819017E-01
   .1898076E-01   .1985297E-01   .2111722E-01   .2221908E-01   .2179768E-01
   .1879190E-01   .1374428E-01   .8510229E-02   .5062118E-02   .4311685E-02
   .5929618E-02   .8732264E-02   .1169931E-01   .1429918E-01   .1595738E-01
   .1618374E-01   .1488940E-01   .1254363E-01   .9454893E-02   .5637022E-02
   .1286861E-02  -.2724699E-02  -.5234561E-02  -.5536277E-02  -.3796551E-02
  -.1364233E-02   .4730707E-03   .1520065E-02   .1933172E-02   .1534548E-02
   .4621098E-03  -.7981542E-03  -.2034673E-02  -.3072266E-02  -.3852200E-02
  -.4450517E-02  -.5052072E-02  -.5712373E-02  -.6109433E-02  -.6074792E-02
  -.5740272E-02  -.5092054E-02  -.4021672E-02  -.2739946E-02  -.1953564E-02
  -.2286609E-02  -.3751687E-02  -.5579947E-02  -.6842295E-02  -.7286878E-02
  -.7573634E-02  -.8411491E-02  -.9870729E-02  -.1108086E-01  -.1069532E-01
  -.7999434E-02  -.3803713E-02  -.1833493E-03   .1200865E-02   .8137517E-03
   .4711604E-03   .1437208E-02   .3235513E-02   .4274352E-02   .3712003E-02
   .2430068E-02   .2095331E-02   .3469998E-02   .5869908E-02   .8071524E-02
   .9563774E-02   .1020888E-01   .9674471E-02   .7719384E-02   .4663747E-02
   .1506175E-02  -.5648376E-03  -.9705514E-03  -.3306628E-03   .2118908E-03
  -.1623227E-03  -.1509324E-02  -.3168479E-02  -.4769906E-02  -.6322405E-02
  -.8123182E-02  -.1054381E-01  -.1365240E-01  -.1676806E-01  -.1882836E-01
  -.1944505E-01  -.1866301E-01  -.1705589E-01  -.1549357E-01  -.1460378E-01
  -.1415728E-01  -.1359008E-01  -.1256626E-01  -.1099906E-01  -.9098949E-02
  -.6932570E-02  -.4348794E-02  -.1729103E-02   .2889079E-03   .1508126E-02
   .2368721E-02   .3430206E-02   .4819680E-02   .6403156E-02   .7948302E-02
   .9029461E-02   .9180606E-02   .8375569E-02   .6878339E-02   .4905188E-02
   .2494446E-02  -.8049774E-04  -.2338727E-02  -.4225997E-02  -.6052911E-02
  -.7730052E-02  -.8687658E-02  -.8631473E-02  -.8171496E-02  -.8402139E-02
  -.9365541E-02  -.9996109E-02  -.9631502E-02  -.8658781E-02  -.7961859E-02
  -.8396961E-02  -.1009709E-01  -.1208253E-01  -.1307913E-01  -.1286384E-01
  -.1230193E-01  -.1206478E-01  -.1149175E-01  -.9247755E-02  -.4905816E-02
   .2796924E-03   .4210408E-02   .5381062E-02   .3750584E-02   .6565301E-03
  -.2339873E-02  -.4256418E-02  -.4719584E-02  -.3906465E-02  -.2539310E-02
  -.8775967E-03   .1135405E-02   .3222747E-02   .5139196E-02   .6822173E-02
   .8089269E-02   .8893601E-02   .9465832E-02   .1010804E-01   .1081682E-01
   .1147984E-01   .1190584E-01   .1169394E-01   .1025267E-01   .7562857E-02
   .4568868E-02   .2719622E-02   .3003662E-02   .5104225E-02   .7921249E-02
   .1026175E-01   .1133414E-01   .1128156E-01   .1109020E-01   .1157899E-01
   .1264337E-01   .1373844E-01   .1426796E-01   .1396235E-01   .1319851E-01
   .1283871E-01   .1339661E-01   .1483935E-01   .1684697E-01   .1909179E-01
   .2132071E-01   .2289373E-01   .2293529E-01   .2065669E-01   .1639936E-01
   .1171842E-01   .8164842E-02   .5973724E-02   .4311292E-02   .2899917E-02
   .2567248E-02   .3848560E-02   .5766107E-02   .6516970E-02   .5336243E-02
   .2938665E-02   .5822090E-03  -.1055325E-02  -.2115798E-02  -.3464454E-02
  -.5871200E-02  -.9060179E-02  -.1177075E-01  -.1314206E-01  -.1314171E-01
  -.1226528E-01  -.1090770E-01  -.9173897E-02  -.7013301E-02  -.4790820E-02
  -.3520428E-02  -.3514257E-02  -.4117678E-02  -.4358530E-02  -.3808752E-02
  -.2388581E-02  -.8995334E-04   .3203767E-02   .7623921E-02   .1233893E-01
   .1560098E-01   .1627033E-01   .1485136E-01   .1265621E-01   .1063171E-01
   .9101193E-02   .8098937E-02   .8006998E-02   .9421581E-02   .1219847E-01
   .1483009E-01   .1541073E-01   .1328309E-01   .9625809E-02   .6774180E-02
   .6311260E-02   .7690230E-02   .9057822E-02   .9024047E-02   .7980507E-02
   .7212452E-02   .7624854E-02   .9081233E-02   .1057976E-01   .1095644E-01
   .9524074E-02   .5890479E-02   .3511308E-03  -.5668387E-02  -.1005265E-01
  -.1137248E-01  -.9861150E-02  -.7149429E-02  -.5188350E-02  -.5079930E-02
  -.6648857E-02  -.8794221E-02  -.1081703E-01  -.1245284E-01  -.1384337E-01
  -.1543293E-01  -.1686540E-01  -.1721244E-01  -.1620703E-01  -.1439711E-01
  -.1247273E-01  -.1073511E-01  -.9415094E-02  -.8671072E-02  -.8409087E-02
  -.8621151E-02  -.9170120E-02  -.9155295E-02  -.7647583E-02  -.4825777E-02
  -.1918033E-02  -.2622039E-04   .9196333E-03   .1998646E-02   .3944050E-02
   .6408790E-02   .8366116E-02   .9147812E-02   .8993737E-02   .9041629E-02
   .9957182E-02   .1102192E-01   .1108539E-01   .9896367E-02   .8528962E-02
   .8395505E-02   .9897535E-02   .1201489E-01   .1313849E-01   .1194079E-01
   .8272304E-02   .3314785E-02  -.1311245E-02  -.4642699E-02  -.6391799E-02
  -.6653274E-02  -.5903107E-02  -.4728654E-02  -.3570679E-02  -.2896908E-02
  -.3048294E-02  -.3977058E-02  -.5531795E-02  -.7656362E-02  -.1012063E-01
  -.1221803E-01  -.1294388E-01  -.1163550E-01  -.8217599E-02  -.3570565E-02
   .8630413E-03   .3858539E-02   .4660395E-02   .3513870E-02   .1456644E-02
  -.4377761E-03  -.1786156E-02  -.2729418E-02  -.3856620E-02  -.5850443E-02
  -.8322411E-02  -.1025237E-01  -.1083553E-01  -.9443087E-02  -.6081271E-02
  -.2125825E-02   .7516032E-03   .1970249E-02   .2592204E-02   .4197411E-02
   .6856137E-02   .9059983E-02   .9234047E-02   .6895044E-02   .2335565E-02
  -.3298835E-02  -.8313963E-02  -.1146254E-01  -.1279161E-01  -.1349655E-01
  -.1430729E-01  -.1463525E-01  -.1372386E-01  -.1160601E-01  -.9257657E-02
  -.7750499E-02  -.7295785E-02  -.7579411E-02  -.8306386E-02  -.9307169E-02
  -.1027392E-01  -.1084474E-01  -.1073622E-01  -.9963503E-02  -.8773133E-02
  -.7092921E-02  -.4405521E-02  -.6301620E-03   .3046312E-02   .4938757E-02
   .4194334E-02   .1164813E-02  -.3141553E-02  -.7557773E-02  -.1131895E-01
  -.1398357E-01  -.1539497E-01  -.1575930E-01  -.1538130E-01  -.1471778E-01
  -.1440477E-01  -.1437415E-01  -.1410047E-01  -.1357471E-01  -.1341352E-01
  -.1438210E-01  -.1633138E-01  -.1828066E-01  -.1944696E-01  -.1961217E-01
  -.1937403E-01  -.1960189E-01  -.2079378E-01  -.2237799E-01  -.2277513E-01
  -.2105698E-01  -.1781636E-01  -.1441705E-01  -.1186904E-01  -.1020349E-01
  -.8503747E-02  -.5666044E-02  -.1436068E-02   .3357779E-02   .7652317E-02
   .1049581E-01   .1156131E-01   .1142663E-01   .1104201E-01   .1086525E-01
   .1051311E-01   .9342737E-02   .7941711E-02   .7815128E-02   .9695024E-02
   .1319435E-01   .1681639E-01   .1863321E-01   .1716533E-01   .1223195E-01
   .5521353E-02   .8794289E-03   .2315172E-02   .9445922E-02   .1555430E-01
   .1323339E-01   .2471742E-02  -.8354170E-02  -.1086257E-01  -.5689489E-02
  -.8131593E-03  -.1584469E-02  -.5460018E-02  -.7177365E-02  -.6256516E-02
  -.6039914E-02  -.7275927E-02  -.6974066E-02  -.3467974E-02   .2559594E-03
  -.3650398E-04  -.4344742E-02  -.8177453E-02  -.8017750E-02  -.4641187E-02
  -.5594951E-03   .3209790E-02   .7437385E-02   .1298098E-01   .1910378E-01
   .2302716E-01   .2250364E-01   .1870171E-01   .1515951E-01   .1415844E-01
   .1471477E-01   .1432593E-01   .1217087E-01   .1001690E-01   .9752628E-02
   .1146053E-01   .1428087E-01   .1756485E-01   .2084845E-01   .2302616E-01
   .2250457E-01   .1895646E-01   .1403962E-01   .1001433E-01   .8239521E-02
   .9245586E-02   .1303938E-01   .1872076E-01   .2470415E-01   .2883818E-01
   .2963416E-01   .2714386E-01   .2288138E-01   .1883487E-01   .1656061E-01
   .1628622E-01   .1638444E-01   .1494514E-01   .1201061E-01   .9504131E-02
   .8832836E-02   .9429122E-02   .9056605E-02   .6554923E-02   .3356718E-02
   .1442007E-02   .7857050E-03  -.1495187E-03  -.1891093E-02  -.3432503E-02
  -.3771199E-02  -.3165534E-02  -.3123527E-02  -.4578295E-02  -.6699562E-02
  -.8368375E-02  -.9516132E-02  -.1014838E-01  -.9392524E-02  -.6968981E-02
  -.4178301E-02  -.2790722E-02  -.3479793E-02  -.5443563E-02  -.7369447E-02
  -.8583715E-02  -.8955621E-02  -.8439931E-02  -.6702624E-02  -.4184754E-02
  -.2640060E-02  -.3387463E-02  -.5593446E-02  -.6990705E-02  -.6398751E-02
  -.4759737E-02  -.3562963E-02  -.3442617E-02  -.4129586E-02  -.5039948E-02
  -.5392750E-02  -.4744182E-02  -.3322433E-02  -.1914233E-02  -.1556046E-02
  -.2785780E-02  -.4742842E-02  -.5170181E-02  -.2589454E-02   .1831339E-02
   .5109037E-02   .5288198E-02   .3601645E-02   .2993754E-02   .5015260E-02
   .8503220E-02   .1121415E-01   .1200864E-01   .1155511E-01   .1120546E-01
   .1127737E-01   .1127636E-01   .1096895E-01   .1062448E-01   .1010239E-01
   .8882466E-02   .7280921E-02   .6194109E-02   .5835334E-02   .5582837E-02
   .4922288E-02   .3741859E-02   .1908103E-02  -.4189054E-03  -.2252914E-02
  -.2494401E-02  -.1156930E-02   .2112608E-03   .6809891E-05  -.2131020E-02
  -.5147256E-02  -.7533556E-02  -.8546425E-02  -.8464742E-02  -.7712300E-02
  -.6506103E-02  -.4837562E-02  -.2859673E-02  -.1448336E-02  -.1915625E-02
  -.4681798E-02  -.8828106E-02  -.1256294E-01  -.1456133E-01  -.1492876E-01
  -.1475768E-01  -.1480998E-01  -.1449479E-01  -.1257701E-01  -.8819588E-02
  -.4643706E-02  -.1848555E-02  -.1450585E-02  -.3076658E-02  -.5419426E-02
  -.7474712E-02  -.8907709E-02  -.9919474E-02  -.1060312E-01  -.1023859E-01
  -.8121184E-02  -.5013441E-02  -.2475461E-02  -.1135917E-02  -.3034608E-03
   .9941400E-03   .2797078E-02   .4319960E-02   .4678953E-02   .3906114E-02
   .2652782E-02   .1421739E-02   .4658474E-03   .3215974E-03   .1534282E-02
   .3873500E-02   .6558047E-02   .8918333E-02   .1102696E-01   .1343633E-01
   .1635690E-01   .1946440E-01   .2194142E-01   .2323224E-01   .2325803E-01
   .2254786E-01   .2211491E-01   .2184892E-01   .2069797E-01   .1822524E-01
   .1511487E-01   .1273994E-01   .1204080E-01   .1272069E-01   .1405766E-01
   .1595090E-01   .1843704E-01   .2075592E-01   .2154207E-01   .2027688E-01
   .1828577E-01   .1749961E-01   .1827540E-01   .1915592E-01   .1861011E-01
   .1624024E-01   .1280604E-01   .9600198E-02   .7457260E-02   .6486842E-02
   .6205797E-02   .6099589E-02   .5945095E-02   .5637646E-02   .4840760E-02
   .3383229E-02   .1161240E-02  -.1646355E-02  -.4310091E-02  -.6600881E-02
  -.8926300E-02  -.1147112E-01  -.1387590E-01  -.1604680E-01  -.1798600E-01
  -.1923643E-01  -.1908203E-01  -.1717022E-01  -.1422762E-01  -.1189394E-01
  -.1137718E-01  -.1253558E-01  -.1406920E-01  -.1450235E-01  -.1348139E-01
  -.1203545E-01  -.1153403E-01  -.1238174E-01  -.1357103E-01  -.1368685E-01
  -.1236967E-01  -.1082791E-01  -.1045588E-01  -.1151590E-01  -.1281278E-01
  -.1252535E-01  -.9944643E-02  -.5738509E-02  -.1643379E-02   .2921035E-03
  -.1121538E-02  -.5251718E-02  -.1030535E-01  -.1451599E-01  -.1703124E-01
  -.1790538E-01  -.1764373E-01  -.1676592E-01  -.1551601E-01  -.1400251E-01
  -.1231816E-01  -.1062118E-01  -.9321046E-02  -.9328050E-02  -.1111700E-01
  -.1414931E-01  -.1721038E-01  -.1934853E-01  -.2019357E-01  -.2023318E-01
  -.2043561E-01  -.2127937E-01  -.2269577E-01  -.2389965E-01  -.2418816E-01
  -.2384159E-01  -.2397383E-01  -.2543749E-01  -.2794781E-01  -.3052353E-01
  -.3215878E-01  -.3225797E-01  -.3068798E-01  -.2775281E-01  -.2415606E-01
  -.2078360E-01  -.1847394E-01  -.1769503E-01  -.1818003E-01  -.1905312E-01
  -.1930392E-01  -.1794740E-01  -.1468634E-01  -.1042292E-01  -.6580226E-02
  -.4046241E-02  -.2839365E-02  -.2453693E-02  -.2092492E-02  -.1280347E-02
  -.2962221E-03   .2616193E-03  -.1504268E-04  -.7630042E-03  -.1156285E-02
  -.7580736E-03   .5091705E-03   .2388612E-02   .3960287E-02   .3962701E-02
   .1960848E-02  -.7935397E-03  -.2545990E-02  -.2420607E-02  -.1331605E-02
  -.1066958E-02  -.2474759E-02  -.4895675E-02  -.6890367E-02  -.7165347E-02
  -.5333563E-02  -.2446984E-02  -.5707759E-03  -.1222029E-02  -.3880867E-02
  -.6090982E-02  -.5680621E-02  -.2564406E-02   .1821270E-02   .5646880E-02
   .7502987E-02   .6663044E-02   .3231505E-02  -.1436991E-02  -.5076782E-02
  -.6047624E-02  -.4419875E-02  -.2076763E-02  -.1016557E-02  -.1861845E-02
  -.3762483E-02  -.5447353E-02  -.5909371E-02  -.4964517E-02  -.3513519E-02
  -.2528059E-02  -.1919631E-02  -.9740672E-03   .6874289E-03   .2768951E-02
   .4505622E-02   .5573414E-02   .6294226E-02   .7147804E-02   .8708511E-02
   .1152846E-01   .1536246E-01   .1927131E-01   .2210835E-01   .2311488E-01
   .2236885E-01   .2037999E-01   .1769117E-01   .1519194E-01   .1390495E-01
   .1404930E-01   .1503223E-01   .1579574E-01   .1574909E-01   .1481174E-01
   .1340696E-01   .1225481E-01   .1182074E-01   .1206040E-01   .1254016E-01
   .1299657E-01   .1362457E-01   .1457340E-01   .1558788E-01   .1619875E-01
   .1600764E-01   .1539273E-01   .1522987E-01   .1619682E-01   .1783373E-01
   .1882676E-01   .1873295E-01   .1796805E-01   .1719472E-01   .1681922E-01
   .1671547E-01   .1669862E-01   .1685961E-01   .1744130E-01   .1871430E-01
   .2061213E-01   .2260016E-01   .2391715E-01   .2399065E-01   .2292356E-01
   .2159306E-01   .2108899E-01   .2206518E-01   .2407866E-01   .2600525E-01
   .2683493E-01   .2649250E-01   .2573178E-01   .2534523E-01   .2578601E-01
   .2713569E-01   .2919906E-01   .3128773E-01   .3277792E-01   .3358125E-01
   .3360579E-01   .3295648E-01   .3204369E-01   .3134313E-01   .3117250E-01
   .3154212E-01   .3223856E-01   .3315281E-01   .3392194E-01   .3392756E-01
   .3252489E-01   .2951635E-01   .2551682E-01   .2148569E-01   .1823128E-01
   .1650687E-01   .1666028E-01   .1793824E-01   .1894107E-01   .1850457E-01
   .1640713E-01   .1362674E-01   .1164354E-01   .1134401E-01   .1243579E-01
   .1360309E-01   .1390514E-01   .1316515E-01   .1161458E-01   .9654344E-02
   .7363575E-02   .5129335E-02   .3411130E-02   .2403469E-02   .1739269E-02
   .1024026E-02   .2394692E-03  -.6683097E-03  -.1762442E-02  -.3146843E-02
  -.4997752E-02  -.7294019E-02  -.9696681E-02  -.1179539E-01  -.1335604E-01
  -.1414565E-01  -.1395244E-01  -.1317540E-01  -.1237979E-01  -.1184301E-01
  -.1162758E-01  -.1159422E-01  -.1118575E-01  -.9450575E-02  -.6057928E-02
  -.1655066E-02   .2720415E-02   .6185923E-02   .8319051E-02   .9010982E-02
   .8942592E-02   .9168339E-02   .1037859E-01   .1259064E-01   .1511696E-01
   .1681328E-01   .1675774E-01   .1490571E-01   .1213094E-01   .9524146E-02
   .7712907E-02   .6956537E-02   .7230613E-02   .7934808E-02   .8334600E-02
   .8402487E-02   .8406875E-02   .8355946E-02   .7895232E-02   .6887815E-02
   .5553591E-02   .4324682E-02   .3419863E-02   .2893415E-02   .2567335E-02
   .1689340E-02  -.2305777E-03  -.2996320E-02  -.5848901E-02  -.7947056E-02
  -.8675657E-02  -.7654464E-02  -.5480786E-02  -.3628615E-02  -.3267551E-02
  -.4115503E-02  -.5075961E-02  -.5190534E-02  -.4181013E-02  -.2805372E-02
  -.2015160E-02  -.1919307E-02  -.1806826E-02  -.9828786E-03   .3668097E-03
   .1348573E-02   .1387122E-02   .8284637E-03   .2492362E-03   .1624669E-03
   .6283933E-03   .1420626E-02   .2328278E-02   .3245472E-02   .4279764E-02
   .5269503E-02   .5842950E-02   .5701213E-02   .4505509E-02   .2008767E-02
  -.1073502E-02  -.3010462E-02  -.2554260E-02   .7513710E-04   .3548533E-02
   .6330284E-02   .7600700E-02   .7644771E-02   .7327508E-02   .7037051E-02
   .6489797E-02   .5481168E-02   .4360528E-02   .3331900E-02   .2384208E-02
   .1835577E-02   .1921441E-02   .2690414E-02   .4131958E-02   .5650941E-02
   .6423289E-02   .6282036E-02   .5850793E-02   .5718283E-02   .5855238E-02
   .5725682E-02   .4633068E-02   .2198128E-02  -.1366449E-02  -.5129726E-02
  -.7676503E-02  -.8053066E-02  -.6267429E-02  -.3429721E-02  -.1230427E-02
  -.9213568E-03  -.2516362E-02  -.5279560E-02  -.8662226E-02  -.1238183E-01
  -.1609100E-01  -.1923610E-01  -.2116672E-01  -.2132844E-01  -.1971516E-01
  -.1669525E-01  -.1282024E-01  -.9359429E-02  -.7780012E-02  -.8401605E-02
  -.1055978E-01  -.1337092E-01  -.1624094E-01  -.1893828E-01  -.2126702E-01
  -.2273160E-01  -.2258458E-01  -.2081906E-01  -.1833330E-01  -.1639190E-01
  -.1585013E-01  -.1608657E-01  -.1593410E-01  -.1502031E-01  -.1380992E-01
  -.1281430E-01  -.1200633E-01  -.1115137E-01  -.1028912E-01  -.9683387E-02
  -.9501635E-02  -.9761201E-02  -.1010079E-01  -.1025371E-01  -.1007645E-01
  -.9587051E-02  -.8870360E-02  -.7760458E-02  -.6239643E-02  -.4863948E-02
  -.4744561E-02  -.6621453E-02  -.1036462E-01  -.1509497E-01  -.1942213E-01
  -.2220148E-01  -.2322478E-01  -.2303316E-01  -.2242551E-01  -.2188383E-01
  -.2128561E-01  -.2019057E-01  -.1822321E-01  -.1533672E-01  -.1231457E-01
  -.1057691E-01  -.1097820E-01  -.1304546E-01  -.1545501E-01  -.1695517E-01
  -.1696100E-01  -.1580121E-01  -.1415546E-01  -.1272449E-01  -.1196905E-01
  -.1174083E-01  -.1102438E-01  -.9185147E-02  -.6773509E-02  -.4860275E-02
  -.3893957E-02  -.3783387E-02  -.4310272E-02  -.5461322E-02  -.7665050E-02
  -.1073539E-01  -.1359320E-01  -.1497698E-01  -.1430334E-01  -.1222026E-01
  -.9807541E-02  -.7878565E-02  -.7146777E-02  -.7677269E-02  -.8654949E-02
  -.9437485E-02  -.1002768E-01  -.1071695E-01  -.1189428E-01  -.1356751E-01
  -.1520806E-01  -.1585367E-01  -.1452195E-01  -.1115617E-01  -.7304701E-02
  -.4624561E-02  -.3228664E-02  -.2288671E-02  -.1240712E-02  -.1410038E-04
   .1183840E-02   .2101393E-02   .2140735E-02   .7358141E-03  -.2106237E-02
  -.5360200E-02  -.7228191E-02  -.5892362E-02  -.9303298E-03   .6282438E-02
   .1334858E-01   .1788121E-01   .1843177E-01   .1483217E-01   .8421588E-02
   .1966769E-02  -.1732143E-02  -.1652402E-02   .7099692E-03   .3017047E-02
   .3870767E-02   .3410709E-02   .2730033E-02   .2523111E-02   .2171916E-02
   .1243361E-02   .7361367E-03   .1710185E-02   .3859680E-02   .5561575E-02
   .5184992E-02   .3014913E-02   .1118165E-02   .9252977E-03   .1858338E-02
   .2491285E-02   .2351368E-02   .1957984E-02   .1547986E-02   .3638315E-03
  -.2600597E-02  -.6948192E-02  -.1065067E-01  -.1186025E-01  -.1062643E-01
  -.8470948E-02  -.7258025E-02  -.8072408E-02  -.1049985E-01  -.1324692E-01
  -.1531986E-01  -.1640340E-01  -.1634650E-01  -.1518985E-01  -.1384149E-01
  -.1334610E-01  -.1391102E-01  -.1486416E-01  -.1528013E-01  -.1472391E-01
  -.1319991E-01  -.1009621E-01  -.4320592E-02   .2585750E-02   .4318087E-02
  -.3401769E-02  -.1323801E-01  -.1163749E-01   .2966527E-02   .1457478E-01
   .8719888E-02  -.9689639E-02  -.2351188E-01  -.2362263E-01  -.1542090E-01
  -.7950046E-02  -.3915463E-02  -.1797983E-02  -.2261647E-02  -.6514555E-02
  -.1166154E-01  -.1289447E-01  -.1001958E-01  -.7072638E-02  -.6759710E-02
  -.8891677E-02  -.1171438E-01  -.1271499E-01  -.9712063E-02  -.3044714E-02
   .4019316E-02   .8083845E-02   .8196448E-02   .6045743E-02   .4203608E-02
   .4037553E-02   .5134305E-02   .6495141E-02   .7569374E-02   .8383345E-02
   .8992452E-02   .9393924E-02   .9732362E-02   .1051047E-01   .1240121E-01
   .1524553E-01   .1723778E-01   .1649618E-01   .1397471E-01   .1261514E-01
   .1305110E-01   .1253997E-01   .9144093E-02   .4920063E-02   .3217269E-02
   .4625889E-02   .7081526E-02   .9040240E-02   .1043597E-01   .1112303E-01
   .1010418E-01   .7277614E-02   .4070941E-02   .1908099E-02   .6673858E-03
  -.5045054E-03  -.1645909E-02  -.2000623E-02  -.7959401E-03   .1891342E-02
   .4840546E-02   .6209898E-02   .5216102E-02   .2957801E-02   .1390533E-02
   .1144873E-02   .8387178E-03  -.7084957E-03  -.2579688E-02  -.2428399E-02
   .5139285E-03   .4092768E-02   .5423316E-02   .4068957E-02   .2252096E-02
   .1902758E-02   .2794958E-02   .3153485E-02   .2143438E-02   .8642973E-03
   .7005950E-03   .1805930E-02   .3320207E-02   .4760105E-02   .6384397E-02
   .8372701E-02   .1019063E-01   .1063008E-01   .8994316E-02   .6007139E-02
   .2796556E-02  -.1149212E-03  -.2144858E-02  -.2925595E-02  -.2892443E-02
  -.2700871E-02  -.2202029E-02  -.5476447E-03   .2490026E-02   .5430997E-02
   .6312202E-02   .4907207E-02   .3074420E-02   .2736518E-02   .4133896E-02
   .6318261E-02   .8377944E-02   .9477840E-02   .9721714E-02   .1010348E-01
   .1127465E-01   .1270042E-01   .1330711E-01   .1261907E-01   .1093058E-01
   .8764831E-02   .6125328E-02   .3389375E-02   .1707230E-02   .1816117E-02
   .3010658E-02   .3703568E-02   .3283700E-02   .2709288E-02   .3409632E-02
   .5444775E-02   .7067547E-02   .6493589E-02   .3703699E-02   .4786651E-03
  -.1273224E-02  -.1028807E-02   .7383746E-04   .6853240E-03   .5236133E-03
   .3598264E-03   .6816938E-03   .6540418E-03  -.8743669E-03  -.3692043E-02
  -.6342093E-02  -.7741468E-02  -.7989183E-02  -.7939863E-02  -.7821187E-02
  -.7178649E-02  -.5680599E-02  -.3139853E-02   .2838007E-03   .4015403E-02
   .6906561E-02   .7821488E-02   .6303181E-02   .3163283E-02   .4499834E-04
  -.1700302E-02  -.1417376E-02   .6775400E-03   .3583302E-02   .6151872E-02
   .7653748E-02   .7938232E-02   .7633724E-02   .7526983E-02   .7805078E-02
   .8126911E-02   .7834817E-02   .6829520E-02   .5835683E-02   .5387745E-02
   .5204657E-02   .4625811E-02   .3315743E-02   .1242508E-02  -.1361740E-02
  -.3754527E-02  -.5074296E-02  -.5257802E-02  -.4952613E-02  -.4704065E-02
  -.4613022E-02  -.4150542E-02  -.3211350E-02  -.2560377E-02  -.2886439E-02
  -.4327242E-02  -.6325254E-02  -.8009556E-02  -.8784668E-02  -.8222273E-02
  -.6229135E-02  -.3233807E-02   .3068737E-03   .4279410E-02   .8265703E-02
   .1114490E-01   .1202107E-01   .1101402E-01   .9231955E-02   .7738999E-02
   .7028349E-02   .7126980E-02   .7656605E-02   .8157906E-02   .8374750E-02
   .8038469E-02   .7182406E-02   .6339901E-02   .5998026E-02   .6180867E-02
   .6383172E-02   .5977623E-02   .4799341E-02   .3281176E-02   .2118824E-02
   .1726831E-02   .2014148E-02   .2036396E-02   .8878426E-03  -.1016413E-02
  -.2794730E-02  -.3882775E-02  -.4335077E-02  -.4710572E-02  -.5705910E-02
  -.7678441E-02  -.1019749E-01  -.1253246E-01  -.1420281E-01  -.1504085E-01
  -.1509573E-01  -.1458514E-01  -.1358138E-01  -.1221051E-01  -.1109277E-01
  -.1114959E-01  -.1286166E-01  -.1568689E-01  -.1868543E-01  -.2075788E-01
  -.2128724E-01  -.2072150E-01  -.1987042E-01  -.1917664E-01  -.1871243E-01
  -.1855332E-01  -.1874281E-01  -.1930013E-01  -.2007392E-01  -.2088810E-01
  -.2126553E-01  -.2064537E-01  -.1926874E-01  -.1780846E-01  -.1671287E-01
  -.1615344E-01  -.1610083E-01  -.1608764E-01  -.1533998E-01  -.1332411E-01
  -.1021935E-01  -.6588763E-02  -.2801573E-02   .8434707E-03   .3565778E-02
   .4500208E-02   .3580246E-02   .1526859E-02  -.5683894E-03  -.1998790E-02
  -.2942710E-02  -.3946422E-02  -.5127716E-02  -.5936018E-02  -.5837075E-02
  -.4754530E-02  -.3175844E-02  -.1714978E-02  -.4424882E-03   .9456011E-03
   .2481575E-02   .3875842E-02   .4879012E-02   .5448172E-02   .5760399E-02
   .6107569E-02   .6819012E-02   .8221094E-02   .1021784E-01   .1256349E-01
   .1489973E-01   .1679979E-01   .1792887E-01   .1799610E-01   .1707893E-01
   .1528668E-01   .1294399E-01   .1073356E-01   .9426506E-02   .9538714E-02
   .1075381E-01   .1218944E-01   .1299360E-01   .1300232E-01   .1297794E-01
   .1378344E-01   .1524675E-01   .1607084E-01   .1523237E-01   .1279744E-01
   .9920138E-02   .7895581E-02   .7429446E-02   .8683175E-02   .1105132E-01
   .1356493E-01   .1533490E-01   .1582885E-01   .1519379E-01   .1407665E-01
   .1291125E-01   .1158080E-01   .9519376E-02   .6380319E-02   .2495984E-02
  -.1563767E-02  -.5094457E-02  -.7236414E-02  -.7753907E-02  -.7240447E-02
  -.6725612E-02  -.6735020E-02  -.7059723E-02  -.7356025E-02  -.7437412E-02
  -.7467285E-02  -.7893296E-02  -.9059018E-02  -.1111018E-01  -.1401904E-01
  -.1724114E-01  -.2008882E-01  -.2202256E-01  -.2279116E-01  -.2262552E-01
  -.2212586E-01  -.2168768E-01  -.2149181E-01  -.2133354E-01  -.2091019E-01
  -.2094182E-01  -.2243953E-01  -.2466236E-01  -.2445888E-01  -.1986616E-01
  -.1345920E-01  -.1017555E-01  -.1177257E-01  -.1517342E-01  -.1624704E-01
  -.1423400E-01  -.1168145E-01  -.1013140E-01  -.8316823E-02  -.5140337E-02
  -.1733916E-02   .2406294E-03   .6481312E-03   .7275200E-03   .1540964E-02
   .2558094E-02   .2705321E-02   .2223621E-02   .2585863E-02   .4820651E-02
   .8183637E-02   .1081638E-01   .1137472E-01   .1011592E-01   .8597307E-02
   .8226203E-02   .9205438E-02   .1075309E-01   .1229100E-01   .1350584E-01
   .1439509E-01   .1516683E-01   .1579817E-01   .1627973E-01   .1681579E-01
   .1768821E-01   .1879301E-01   .1935869E-01   .1882717E-01   .1740183E-01
   .1581565E-01   .1483321E-01   .1444156E-01   .1430320E-01   .1447212E-01
   .1528169E-01   .1687661E-01   .1902599E-01   .2092981E-01   .2181464E-01
   .2135783E-01   .1965627E-01   .1725192E-01   .1470706E-01   .1249183E-01
   .1076107E-01   .9469654E-02   .8683338E-02   .8400521E-02   .8585166E-02
   .8995598E-02   .9296856E-02   .9048833E-02   .8294724E-02   .7476808E-02
   .6542168E-02   .4941488E-02   .2578358E-02   .4612177E-03  -.3625821E-03
   .4387755E-03   .2141365E-02   .3689946E-02   .4237702E-02   .3265111E-02
   .1294672E-02  -.6434367E-03  -.1998442E-02  -.2871743E-02  -.2864621E-02
  -.1329091E-02   .1722035E-02   .5178799E-02   .7541833E-02   .8127127E-02
   .7280164E-02   .5996398E-02   .4921367E-02   .4188922E-02   .3741005E-02
   .3550662E-02   .3711705E-02   .4166517E-02   .4271391E-02   .3287506E-02
   .1544849E-02  -.6409400E-04  -.9399852E-03  -.8165498E-03  -.6891475E-05
   .5216257E-03  -.2604618E-03  -.2480561E-02  -.5336258E-02  -.7668665E-02
  -.8635046E-02  -.8052354E-02  -.6498957E-02  -.4644971E-02  -.2982921E-02
  -.1479956E-02   .2856743E-03   .2233415E-02   .3630347E-02   .3928093E-02
   .3404357E-02   .2255652E-02   .3976856E-03  -.1909887E-02  -.4163848E-02
  -.5878656E-02  -.6995305E-02  -.7712545E-02  -.8038982E-02  -.7875028E-02
  -.7329040E-02  -.6700329E-02  -.6605504E-02  -.7785115E-02  -.1013174E-01
  -.1263666E-01  -.1404255E-01  -.1345344E-01  -.1120767E-01  -.8323202E-02
  -.5435147E-02  -.2581989E-02   .1914564E-03   .2675959E-02   .5016014E-02
   .7403641E-02   .9450592E-02   .1058736E-01   .1117280E-01   .1189335E-01
   .1265498E-01   .1272796E-01   .1175521E-01   .1008030E-01   .8742734E-02
   .8770994E-02   .1030455E-01   .1248661E-01   .1415021E-01   .1446175E-01
   .1322603E-01   .1058419E-01   .7259312E-02   .4931500E-02   .5138222E-02
   .7653060E-02   .1073737E-01   .1286062E-01   .1368718E-01   .1379553E-01
   .1394797E-01   .1455974E-01   .1557225E-01   .1646551E-01   .1667749E-01
   .1628383E-01   .1610272E-01   .1699539E-01   .1886929E-01   .2096047E-01
   .2247591E-01   .2275442E-01   .2161514E-01   .1938513E-01   .1647760E-01
   .1359923E-01   .1134791E-01   .1000680E-01   .9456802E-02   .9396871E-02
   .9659836E-02   .9613545E-02   .8731452E-02   .7169498E-02   .5439666E-02
   .4121687E-02   .3405507E-02   .3045321E-02   .2480848E-02   .1165125E-02
  -.8048552E-03  -.2823482E-02  -.4095368E-02  -.4119055E-02  -.3087901E-02
  -.1842843E-02  -.1023917E-02  -.5229100E-03  -.3447122E-03  -.1011240E-02
  -.2912605E-02  -.5652357E-02  -.8167777E-02  -.9728217E-02  -.1026357E-01
  -.1015742E-01  -.9940657E-02  -.9862081E-02  -.9895587E-02  -.9996600E-02
  -.1008977E-01  -.9899533E-02  -.9445905E-02  -.9091419E-02  -.9059497E-02
  -.9423785E-02  -.1016469E-01  -.1118722E-01  -.1207453E-01  -.1241621E-01
  -.1204499E-01  -.1100246E-01  -.9660226E-02  -.8284922E-02  -.7008021E-02
  -.5909449E-02  -.5228047E-02  -.5359719E-02  -.6559416E-02  -.8699218E-02
  -.1111100E-01  -.1281415E-01  -.1319503E-01  -.1212149E-01  -.1008566E-01
  -.8042388E-02  -.6944657E-02  -.7266712E-02  -.8717293E-02  -.1051603E-01
  -.1203631E-01  -.1329307E-01  -.1461168E-01  -.1608464E-01  -.1745366E-01
  -.1830341E-01  -.1855617E-01  -.1852399E-01  -.1845020E-01  -.1819216E-01
  -.1763716E-01  -.1672581E-01  -.1542540E-01  -.1406457E-01  -.1317433E-01
  -.1315440E-01  -.1398108E-01  -.1538081E-01  -.1713602E-01  -.1889069E-01
  -.2016319E-01  -.2064052E-01  -.2034100E-01  -.1937644E-01  -.1797018E-01
  -.1661637E-01  -.1582293E-01  -.1580178E-01  -.1646909E-01  -.1745567E-01
  -.1848307E-01  -.1954906E-01  -.2049795E-01  -.2095982E-01  -.2066953E-01
  -.1988916E-01  -.1931235E-01  -.1948313E-01  -.2033040E-01  -.2125861E-01
  -.2164341E-01  -.2105287E-01  -.1975399E-01  -.1839764E-01  -.1751124E-01
  -.1717012E-01  -.1722009E-01  -.1773559E-01  -.1865480E-01  -.1973536E-01
  -.2077951E-01  -.2150972E-01  -.2150902E-01  -.2037973E-01  -.1845159E-01
  -.1649526E-01  -.1498708E-01  -.1394497E-01  -.1311379E-01  -.1235816E-01
  -.1167534E-01  -.1119623E-01  -.1132110E-01  -.1216326E-01  -.1338636E-01
  -.1442009E-01  -.1464815E-01  -.1375930E-01  -.1196100E-01  -.1006592E-01
  -.8938827E-02  -.8600512E-02  -.8554266E-02  -.8563095E-02  -.8439242E-02
  -.8155341E-02  -.7821120E-02  -.7374268E-02  -.6771921E-02  -.5900127E-02
  -.4500439E-02  -.2461394E-02  -.1278011E-03   .1843594E-02   .2776059E-02
   .2385576E-02   .1263787E-02   .1330842E-03  -.7301482E-03  -.1456116E-02
  -.2314883E-02  -.3092271E-02  -.3389612E-02  -.3106245E-02  -.2262338E-02
  -.1076987E-02   .6309926E-04   .7379101E-03   .5979901E-03  -.1708306E-03
  -.9717290E-03  -.1370750E-02  -.1284330E-02  -.1123980E-02  -.1340267E-02
  -.1657391E-02  -.1418261E-02  -.6909927E-03  -.1275556E-03   .5778666E-04
   .1035333E-03  -.1953092E-03  -.1331818E-02  -.3449901E-02  -.5825429E-02
  -.7431220E-02  -.7915144E-02  -.7489331E-02  -.6556816E-02  -.5517536E-02
  -.4819117E-02  -.4526092E-02  -.4174415E-02  -.3423930E-02  -.2396093E-02
  -.1401348E-02  -.7116007E-03  -.3511516E-03  -.2550697E-03  -.5850363E-03
  -.1273660E-02  -.1879887E-02  -.1749086E-02  -.7023138E-03   .8112762E-03
   .2074430E-02   .2848543E-02   .3433134E-02   .3906708E-02   .4077493E-02
   .4170854E-02   .4576289E-02   .5409418E-02   .6462462E-02   .7275563E-02
   .7581594E-02   .7481370E-02   .7213149E-02   .6765846E-02   .6217949E-02
   .5956453E-02   .6004859E-02   .5882907E-02   .5163534E-02   .3852828E-02
   .2214321E-02   .9844985E-03   .9128773E-03   .1893785E-02   .3050639E-02
   .3495992E-02   .3148016E-02   .2519080E-02   .2273310E-02   .2707675E-02
   .3835192E-02   .5397894E-02   .6848443E-02   .7544881E-02   .7224645E-02
   .6193281E-02   .5001174E-02   .4240547E-02   .4154364E-02   .4350231E-02
   .4112569E-02   .3105279E-02   .1652885E-02   .3292291E-03  -.1919384E-03
   .5238071E-03   .2145645E-02   .3758455E-02   .4672220E-02   .4756670E-02
   .4536478E-02   .4567466E-02   .5000665E-02   .5667628E-02   .6227823E-02
   .6610639E-02   .6783468E-02   .6697984E-02   .6455411E-02   .6162619E-02
   .5739070E-02   .5166601E-02   .4800968E-02   .4608652E-02   .4116105E-02
   .3182025E-02   .1903784E-02   .5663966E-03  -.5510843E-03  -.1431035E-02
  -.2286649E-02  -.3530536E-02  -.5323371E-02  -.7236660E-02  -.8724087E-02
  -.9409887E-02  -.8997005E-02  -.7506349E-02  -.5620853E-02  -.4372918E-02
  -.4226561E-02  -.4742498E-02  -.5027507E-02  -.4890848E-02  -.4913439E-02
  -.5571815E-02  -.6682049E-02  -.7762976E-02  -.8184665E-02  -.7698676E-02
  -.6610949E-02  -.5597113E-02  -.5345551E-02  -.5750375E-02  -.6066244E-02
  -.5922157E-02  -.5179174E-02  -.3667074E-02  -.1591839E-02   .6050381E-03
   .2624622E-02   .4360768E-02   .5824918E-02   .7116291E-02   .8368844E-02
   .9580861E-02   .1058378E-01   .1129276E-01   .1210396E-01   .1331436E-01
   .1456448E-01   .1538527E-01   .1557427E-01   .1511809E-01   .1453651E-01
   .1441437E-01   .1489337E-01   .1575250E-01   .1640973E-01   .1648194E-01
   .1599433E-01   .1525221E-01   .1454925E-01   .1389931E-01   .1316173E-01
   .1212381E-01   .1097646E-01   .1036411E-01   .1045976E-01   .1064798E-01
   .1039822E-01   .9896715E-02   .9445326E-02   .8732659E-02   .7401285E-02
   .5528347E-02   .3167264E-02   .8255116E-03  -.3638320E-03   .3404237E-03
   .2485861E-02   .4508485E-02   .5125375E-02   .4321638E-02   .2924248E-02
   .1607724E-02   .3886047E-03  -.9832642E-03  -.2266526E-02  -.3056103E-02
  -.3228215E-02  -.2690254E-02  -.1580365E-02  -.3725001E-03   .3938130E-03
   .6491440E-03   .5307510E-03   .7495180E-04  -.4450522E-03  -.7147135E-03
  -.5672327E-03  -.2946255E-04   .7675720E-03   .1437614E-02   .1567842E-02
   .1314118E-02   .1190629E-02   .1365455E-02   .1748100E-02   .2252085E-02
   .2612503E-02   .2553421E-02   .2148821E-02   .1733557E-02   .1682818E-02
   .2088923E-02   .2645342E-02   .3062744E-02   .3338658E-02   .3758782E-02
   .4647900E-02   .5784179E-02   .6775494E-02   .7217488E-02   .7130613E-02
   .6992402E-02   .7223778E-02   .8189503E-02   .9834111E-02   .1202386E-01
   .1469404E-01   .1724092E-01   .1896850E-01   .1946728E-01   .1899723E-01
   .1831032E-01   .1794104E-01   .1802589E-01   .1857146E-01   .1947194E-01
   .2068059E-01   .2207337E-01   .2325056E-01   .2381317E-01   .2338371E-01
   .2191701E-01   .1988185E-01   .1793231E-01   .1648303E-01   .1566313E-01
   .1558081E-01   .1635973E-01   .1769524E-01   .1874100E-01   .1885345E-01
   .1815275E-01   .1705764E-01   .1605526E-01   .1538401E-01   .1478239E-01
   .1346610E-01   .1086085E-01   .8092552E-02   .7035429E-02   .7725935E-02
   .8332338E-02   .7387820E-02   .5424631E-02   .4354406E-02   .5442353E-02
   .8024129E-02   .9989327E-02   .9321420E-02   .5705319E-02   .1436302E-02
  -.3318520E-04   .2342804E-02   .5778470E-02   .6456641E-02   .3690621E-02
   .8082701E-03   .1606034E-02   .5999329E-02   .1028250E-01   .1120018E-01
   .8891697E-02   .5820676E-02   .4019234E-02   .3690111E-02   .4008380E-02
   .4509029E-02   .5020792E-02   .4783794E-02   .3136737E-02   .8869858E-03
  -.1159234E-03   .1070814E-02   .3441908E-02   .4695640E-02   .3596629E-02
   .1098338E-02  -.8591262E-03  -.8957835E-03   .7802991E-03   .2586318E-02
   .2864950E-02   .1233805E-02  -.1215532E-02  -.3238266E-02  -.4461267E-02
  -.5228610E-02  -.6090341E-02  -.7229790E-02  -.8362357E-02  -.8867310E-02
  -.8425219E-02  -.7432926E-02  -.6580748E-02  -.6356654E-02  -.6713605E-02
  -.7483577E-02  -.8282885E-02  -.8794916E-02  -.9041809E-02  -.9196920E-02
  -.9314227E-02  -.9226407E-02  -.8991487E-02  -.8763135E-02  -.8460440E-02
  -.8031319E-02  -.7679132E-02  -.7746176E-02  -.8297439E-02  -.8791821E-02
  -.8460409E-02  -.6934303E-02  -.4713649E-02  -.2938235E-02  -.2380145E-02
  -.2980044E-02  -.4088083E-02  -.4686247E-02  -.4184446E-02  -.2668295E-02
  -.6314608E-03   .1451448E-02   .3260660E-02   .4328418E-02   .4355220E-02
   .3417131E-02   .2075270E-02   .1264269E-02   .1526671E-02   .2714152E-02
   .4050757E-02   .4515252E-02   .3805823E-02   .2474176E-02   .1264549E-02
   .3288483E-03  -.6667113E-03  -.1916768E-02  -.3095452E-02  -.3752519E-02
  -.3572325E-02  -.2688704E-02  -.1912786E-02  -.2003006E-02  -.2747440E-02
  -.3386365E-02  -.3547429E-02  -.3302509E-02  -.2931642E-02  -.2537324E-02
  -.2278943E-02  -.2434726E-02  -.2952122E-02  -.3355063E-02  -.3462660E-02
  -.3467138E-02  -.3773196E-02  -.4462637E-02  -.5198138E-02  -.5442610E-02
  -.4915661E-02  -.3771865E-02  -.2422439E-02  -.1601550E-02  -.1997734E-02
  -.3570957E-02  -.5326702E-02  -.6190760E-02  -.6160944E-02  -.5927165E-02
  -.5872423E-02  -.6270314E-02  -.7373061E-02  -.8865748E-02  -.9997078E-02
  -.1033553E-01  -.1001702E-01  -.9460647E-02  -.8944590E-02  -.8229402E-02
  -.6867096E-02  -.4859871E-02  -.2712540E-02  -.8802564E-03   .4101804E-03
   .7752787E-03   .3262711E-04  -.1477315E-02  -.2757169E-02  -.3012876E-02
  -.2117735E-02  -.4778344E-03   .1232076E-02   .2536417E-02   .3307632E-02
   .3520948E-02   .2987006E-02   .1670415E-02  -.2451221E-03  -.2328110E-02
  -.3963147E-02  -.4615031E-02  -.4273756E-02  -.3413327E-02  -.2543576E-02
  -.2042019E-02  -.1692836E-02  -.1299298E-02  -.1211302E-02  -.1689454E-02
  -.2445160E-02  -.2866504E-02  -.2792702E-02  -.2830567E-02  -.3658125E-02
  -.5183682E-02  -.6456450E-02  -.6397111E-02  -.4645817E-02  -.2076921E-02
  -.2452758E-03  -.1773780E-03  -.1793625E-02  -.3963148E-02  -.5218474E-02
  -.4980669E-02  -.3920415E-02  -.3009650E-02  -.2745323E-02  -.2688197E-02
  -.2176317E-02  -.1197127E-02  -.3636636E-03  -.1131938E-04  -.8385362E-04
  -.1137788E-03   .5130275E-03   .1697814E-02   .2689456E-02   .2624664E-02
   .1243531E-02  -.9260994E-03  -.2682904E-02  -.3016985E-02  -.1601566E-02
   .9866180E-03   .3642133E-02   .5687538E-02   .6961944E-02   .7737859E-02
   .8268083E-02   .8591567E-02   .8702835E-02   .8474280E-02   .7597858E-02
   .6034546E-02   .4441911E-02   .3654642E-02   .3923479E-02   .5015144E-02
   .6397994E-02   .7183892E-02   .6690783E-02   .5060289E-02   .3217096E-02
   .2207308E-02   .2227033E-02   .2549667E-02   .2479976E-02   .1842740E-02
   .1090874E-02   .8928791E-03   .1458114E-02   .2335528E-02   .3058920E-02
   .3403598E-02   .3294546E-02   .2951019E-02   .2586590E-02   .2182231E-02
   .1776353E-02   .1392770E-02   .6764980E-03  -.7114798E-03  -.2574305E-02
  -.4181140E-02  -.4819242E-02  -.4674202E-02  -.4496695E-02  -.4890071E-02
  -.6026055E-02  -.7345683E-02  -.8069462E-02  -.7895238E-02  -.7192327E-02
  -.6747578E-02  -.6965642E-02  -.7466363E-02  -.7748805E-02  -.7634782E-02
  -.7441518E-02  -.7736483E-02  -.8734413E-02  -.1032148E-01  -.1198787E-01
  -.1309358E-01  -.1370339E-01  -.1435747E-01  -.1548691E-01  -.1701261E-01
  -.1828130E-01  -.1906229E-01  -.1957533E-01  -.2024776E-01  -.2119588E-01
  -.2227387E-01  -.2329291E-01  -.2404508E-01  -.2445134E-01  -.2460053E-01
  -.2472395E-01  -.2484021E-01  -.2483199E-01  -.2447863E-01  -.2388237E-01
  -.2347801E-01  -.2367922E-01  -.2442349E-01  -.2519485E-01  -.2540602E-01
  -.2482583E-01  -.2357959E-01  -.2187887E-01  -.2028027E-01  -.1951174E-01
  -.1971251E-01  -.2028515E-01  -.2056929E-01  -.2043643E-01  -.2003830E-01
  -.1969699E-01  -.1972192E-01  -.2008579E-01  -.2027468E-01  -.1977033E-01
  -.1858799E-01  -.1708836E-01  -.1582991E-01  -.1508212E-01  -.1464968E-01
  -.1443550E-01  -.1441731E-01  -.1454202E-01  -.1470914E-01  -.1486070E-01
  -.1496844E-01  -.1483908E-01  -.1414322E-01  -.1309645E-01  -.1227998E-01
  -.1202202E-01  -.1252512E-01  -.1399935E-01  -.1624332E-01  -.1838659E-01
  -.1923082E-01  -.1788244E-01  -.1455717E-01  -.1064238E-01  -.7773048E-02
  -.6657820E-02  -.6716613E-02  -.6871973E-02  -.6680627E-02  -.6333043E-02
  -.6252593E-02  -.6826927E-02  -.7850773E-02  -.8760051E-02  -.9269133E-02
  -.9434939E-02  -.9628652E-02  -.9988008E-02  -.1030704E-01  -.1049005E-01
  -.1052249E-01  -.1037652E-01  -.1009284E-01  -.9728720E-02  -.9276275E-02
  -.8892434E-02  -.8662909E-02  -.8669405E-02  -.8915564E-02  -.9047472E-02
  -.8766482E-02  -.7963780E-02  -.6822203E-02  -.5470796E-02  -.4000134E-02
  -.2510326E-02  -.1225544E-02  -.2577381E-03   .2325743E-03   .1805915E-03
  -.6316612E-04  -.3678330E-03  -.6074897E-03  -.4961558E-03   .3629281E-03
   .2283165E-02   .4688832E-02   .6433719E-02   .7075718E-02   .7081693E-02
   .7200066E-02   .7678239E-02   .8210942E-02   .8569160E-02   .8822207E-02
   .9056806E-02   .9155555E-02   .9051820E-02   .9027314E-02   .9291512E-02
   .9686944E-02   .9730985E-02   .8835945E-02   .7399371E-02   .6706960E-02
   .7707108E-02   .1003568E-01   .1257793E-01   .1450971E-01   .1566152E-01
   .1625913E-01   .1627774E-01   .1562005E-01   .1453205E-01   .1336235E-01
   .1231127E-01   .1163245E-01   .1174660E-01   .1270642E-01   .1391567E-01
   .1451802E-01   .1411826E-01   .1311128E-01   .1204781E-01   .1117747E-01
   .1049735E-01   .9774120E-02   .8872842E-02   .7934599E-02   .7076444E-02
   .6228967E-02   .5424088E-02   .4953965E-02   .5091043E-02   .5454074E-02
   .5255392E-02   .4353496E-02   .3330561E-02   .2776674E-02   .2996057E-02
   .3997084E-02   .5244694E-02   .5997214E-02   .5835973E-02   .5089195E-02
   .4727632E-02   .5321048E-02   .6479611E-02   .7213372E-02   .6941091E-02
   .6094804E-02   .5456957E-02   .5353030E-02   .5647368E-02   .5999755E-02
   .5955356E-02   .5345310E-02   .4395797E-02   .3362674E-02   .2506470E-02
   .2001758E-02   .1757164E-02   .1491221E-02   .1020978E-02   .4713152E-03
   .3251700E-03   .1064283E-02   .2266542E-02   .3204731E-02   .3551491E-02
   .3310009E-02   .2747964E-02   .2174719E-02   .1836095E-02   .1802276E-02
   .2094022E-02   .2647965E-02   .2942356E-02   .2655913E-02   .2240279E-02
   .2075104E-02   .2494940E-02   .3625027E-02   .4807457E-02   .5348327E-02
   .5267288E-02   .4987306E-02   .4908531E-02   .5148061E-02   .5735175E-02
   .6685151E-02   .7950134E-02   .9388787E-02   .1100291E-01   .1288147E-01
   .1480966E-01   .1633216E-01   .1705505E-01   .1702903E-01   .1651978E-01
   .1584658E-01   .1522807E-01   .1464478E-01   .1394212E-01   .1319242E-01
   .1251543E-01   .1196722E-01   .1178325E-01   .1214385E-01   .1303153E-01
   .1419702E-01   .1523602E-01   .1605448E-01   .1679184E-01   .1740758E-01
   .1768309E-01   .1747878E-01   .1683273E-01   .1606605E-01   .1535078E-01
   .1462395E-01   .1388316E-01   .1330919E-01   .1318006E-01   .1350872E-01
   .1379266E-01   .1335341E-01   .1215358E-01   .1062517E-01   .9361095E-02
   .8705640E-02   .8388544E-02   .7946263E-02   .7331206E-02   .6582769E-02
   .5661110E-02   .4568649E-02   .3369503E-02   .2129794E-02   .9832663E-03
   .4698146E-04  -.5761261E-03  -.7189424E-03  -.3912032E-03   .1416395E-03
   .4536225E-03   .4364170E-03   .2668792E-03   .9269297E-04   .1118959E-03
   .5269821E-03   .1368879E-02   .2477945E-02   .3639006E-02   .4941855E-02
   .6488566E-02   .7966656E-02   .9050289E-02   .9700033E-02   .1018834E-01
   .1087805E-01   .1193955E-01   .1320331E-01   .1431365E-01   .1501247E-01
   .1505092E-01   .1450117E-01   .1376813E-01   .1339569E-01   .1386631E-01
   .1517520E-01   .1684006E-01   .1832690E-01   .1930289E-01   .1956556E-01
   .1933181E-01   .1900485E-01   .1864319E-01   .1804016E-01   .1693122E-01
   .1553520E-01   .1463921E-01   .1480671E-01   .1577216E-01   .1655498E-01
   .1650113E-01   .1590495E-01   .1531456E-01   .1485802E-01   .1429613E-01
   .1337202E-01   .1213722E-01   .1055865E-01   .8502654E-02   .6344111E-02
   .4937195E-02   .4790832E-02   .5530121E-02   .6281297E-02   .6565121E-02
   .6688619E-02   .6915776E-02   .6546745E-02   .4921284E-02   .2627037E-02
   .9937588E-03   .5392789E-03   .5013321E-03   .5362709E-04  -.7556103E-03
  -.1325345E-02  -.1367063E-02  -.1274762E-02  -.1788264E-02  -.3198945E-02
  -.4964087E-02  -.6368703E-02  -.6861797E-02  -.6232625E-02  -.4862676E-02
  -.3743596E-02  -.3909745E-02  -.5453882E-02  -.7021290E-02  -.6982651E-02
  -.5014044E-02  -.2449765E-02  -.7637618E-03  -.2071316E-03  -.2801920E-03
  -.5023456E-03  -.5743190E-03  -.5101734E-03  -.6059660E-03  -.9765876E-03
  -.1518572E-02  -.2329607E-02  -.3692131E-02  -.5308248E-02  -.6532390E-02
  -.7186512E-02  -.7282492E-02  -.7117806E-02  -.7282392E-02  -.8018612E-02
  -.9258427E-02  -.1089861E-01  -.1264123E-01  -.1379056E-01  -.1350938E-01
  -.1176607E-01  -.9499083E-02  -.7366599E-02  -.5178101E-02  -.2932219E-02
  -.1721760E-02  -.2515097E-02  -.4805938E-02  -.6969772E-02  -.7641052E-02
  -.6652068E-02  -.4735968E-02  -.2699694E-02  -.1228020E-02  -.5047187E-03
  -.1392080E-03   .3730735E-03   .1029471E-02   .1324647E-02   .8606283E-03
  -.1345031E-03  -.9475693E-03  -.1057955E-02  -.5867245E-03  -.2126198E-03
  -.3926602E-03  -.6947288E-03  -.4857362E-03   .4894086E-03   .1996366E-02
   .3160168E-02   .3295948E-02   .2527914E-02   .1610948E-02   .1134814E-02
   .1294070E-02   .1534198E-02   .1037906E-02  -.1361153E-03  -.1200332E-02
  -.1327806E-02  -.2591883E-03   .1434059E-02   .2975761E-02   .4208574E-02
   .4817958E-02   .4426406E-02   .3184099E-02   .1563500E-02   .1944922E-03
  -.9153086E-03  -.2067143E-02  -.3229346E-02  -.4042508E-02  -.4095937E-02
  -.3399786E-02  -.2728980E-02  -.2907614E-02  -.3714746E-02  -.4212391E-02
  -.3655905E-02  -.2295040E-02  -.1268238E-02  -.1424146E-02  -.2793696E-02
  -.4911163E-02  -.6861983E-02  -.7626513E-02  -.6897588E-02  -.4966541E-02
  -.2591516E-02  -.7475522E-03   .1405253E-03   .3818423E-03   .5160235E-03
   .6456379E-03   .4702562E-03   .7372189E-04  -.2056278E-03  -.2883104E-03
  -.2841494E-03  -.2742039E-03  -.2731506E-03  -.9763725E-04   .6880754E-03
   .2114157E-02   .3906464E-02   .5732040E-02   .7166282E-02   .8011780E-02
   .8635211E-02   .9455390E-02   .1034734E-01   .1098568E-01   .1127618E-01
   .1132461E-01   .1110720E-01   .1060365E-01   .9721760E-02   .8484217E-02
   .7066858E-02   .6061034E-02   .5874456E-02   .6048260E-02   .6032585E-02
   .5533866E-02   .4621558E-02   .3789735E-02   .3470759E-02   .3844282E-02
   .4702107E-02   .5782197E-02   .6845898E-02   .7814853E-02   .8658196E-02
   .9216060E-02   .9443901E-02   .9495011E-02   .9511568E-02   .9546096E-02
   .9614447E-02   .9860045E-02   .1058134E-01   .1140626E-01   .1153075E-01
   .1072160E-01   .9416965E-02   .8460784E-02   .8320093E-02   .8711141E-02
   .9035529E-02   .8944267E-02   .8402912E-02   .7510658E-02   .6524084E-02
   .5941513E-02   .5724061E-02   .5247314E-02   .4275531E-02   .3240221E-02
   .2564293E-02   .2414140E-02   .2647670E-02   .2987207E-02   .3392688E-02
   .3868238E-02   .4571357E-02   .5432542E-02   .5961299E-02   .5699369E-02
   .4509575E-02   .2722689E-02   .9798121E-03  -.2473385E-03  -.7942139E-03
  -.7090554E-03   .2611729E-04   .1194977E-02   .2280330E-02   .3044482E-02
   .3544421E-02   .3850587E-02   .4080988E-02   .4266980E-02   .4138382E-02
   .3300127E-02   .1821644E-02   .2003064E-03  -.9129666E-03  -.1055396E-02
  -.4327800E-03   .5672439E-03   .1509428E-02   .2098869E-02   .2487584E-02
   .3057795E-02   .3910757E-02   .4586893E-02   .4499036E-02   .3557631E-02
   .2202315E-02   .1118967E-02   .9085355E-03   .1642960E-02   .2933372E-02
   .4303875E-02   .5312039E-02   .5656804E-02   .5413708E-02   .4885110E-02
   .4290430E-02   .3850314E-02   .3607389E-02   .3306331E-02   .2896507E-02
   .2772969E-02   .2865412E-02   .2795280E-02   .2644942E-02   .2614779E-02
   .2602004E-02   .2583864E-02   .2711744E-02   .3100476E-02   .3876859E-02
   .5005711E-02   .6455969E-02   .8048349E-02   .9198423E-02   .9487458E-02
   .9125190E-02   .8521146E-02   .8012394E-02   .7671975E-02   .7514112E-02
   .7491613E-02   .7626987E-02   .8031703E-02   .8437581E-02   .8075228E-02
   .6997765E-02   .7211801E-02   .1064979E-01   .1497667E-01   .1436241E-01
   .7373835E-02   .9066944E-03   .2734254E-02   .1241597E-01   .2095637E-01
   .1886089E-01   .6935640E-02  -.2343115E-02   .1670589E-04   .6543378E-02
   .6111152E-02   .5261663E-02   .1983409E-01   .4497924E-01   .5223223E-01
   .2450463E-01  -.1785159E-01  -.3706077E-01  -.2021384E-01   .8406551E-02
   .1875293E-01   .9538426E-02   .3895042E-02   .1557832E-01   .3050479E-01
   .2661935E-01   .5241036E-02  -.9431015E-02  -.3567635E-02   .7738780E-02
   .3395560E-02  -.1419401E-01  -.2266504E-01  -.8401072E-02   .1449340E-01
   .1865754E-01  -.3179538E-02  -.2902001E-01  -.3508479E-01  -.2147711E-01
  -.5540719E-02   .5043866E-03  -.2319629E-02  -.7342191E-02  -.9117850E-02
  -.5742153E-02  -.6095084E-03  -.5841810E-03  -.7777360E-02  -.1532224E-01
  -.1606456E-01  -.1283271E-01  -.1292336E-01  -.1403476E-01  -.7049820E-02
   .6535013E-02   .1299756E-01   .4746624E-02  -.9331036E-02  -.1560644E-01
  -.1153790E-01  -.5181666E-02  -.2960922E-02  -.3811358E-02  -.4298443E-02
  -.4263883E-02  -.5898771E-02  -.9313622E-02  -.1161745E-01  -.1050255E-01
  -.7259059E-02  -.5710040E-02  -.7752094E-02  -.1060246E-01  -.1030768E-01
  -.7523840E-02  -.6630365E-02  -.9640387E-02  -.1371223E-01  -.1459622E-01
  -.1087386E-01  -.5186131E-02  -.1825394E-02  -.3113897E-02  -.7899356E-02
  -.1330380E-01  -.1611329E-01  -.1360761E-01  -.6066082E-02   .2107952E-02
   .5489681E-02   .2687553E-02  -.1581745E-02  -.1325936E-02   .3152449E-02
   .5132006E-02   .1225560E-03  -.7704476E-02  -.1055225E-01  -.6663725E-02
  -.1945408E-02  -.1425380E-02  -.3448241E-02  -.3846180E-02  -.2218035E-02
  -.1140209E-02  -.9954924E-03   .4307022E-03   .3597529E-02   .5691209E-02
   .4327017E-02   .2129121E-03  -.4687288E-02  -.8925981E-02  -.1079722E-01
  -.8044360E-02  -.7446199E-03   .6422041E-02   .8209446E-02   .4472761E-02
  -.2499775E-03  -.2648576E-02  -.4034530E-02  -.6649598E-02  -.9415757E-02
  -.9380536E-02  -.6305046E-02  -.3375203E-02  -.3050117E-02  -.4278402E-02
  -.4642765E-02  -.3500747E-02  -.2513094E-02  -.3191292E-02  -.4611734E-02
  -.4869399E-02  -.3879414E-02  -.3315105E-02  -.4173247E-02  -.6029812E-02
  -.7869493E-02  -.8545163E-02  -.7216287E-02  -.4137622E-02  -.9506764E-03
   .4281598E-03  -.4929725E-03  -.2600726E-02  -.4346833E-02  -.4639654E-02
  -.2666854E-02   .1298041E-02   .4996654E-02   .5935034E-02   .3513368E-02
  -.8355368E-03  -.4501327E-02  -.5332456E-02  -.3377916E-02  -.8668090E-03
  -.1467107E-04  -.7213003E-03  -.4343640E-03   .3306125E-02   .1003175E-01
   .1669970E-01   .2101458E-01   .2286142E-01   .2190661E-01   .1630870E-01
   .5415676E-02  -.6903563E-02  -.1404125E-01  -.1350623E-01  -.1026806E-01
  -.1037353E-01  -.1329283E-01  -.1461441E-01  -.1319339E-01  -.1151599E-01
  -.1042104E-01  -.7505489E-02  -.5703449E-03   .9383196E-02   .1931471E-01
   .2642628E-01   .2800242E-01   .2066690E-01   .4987676E-02  -.1005706E-01
  -.1380241E-01  -.7132104E-02  -.2860780E-02  -.8689255E-02  -.1652284E-01
  -.1428611E-01  -.3035421E-02   .4564153E-02   .4099820E-03  -.1021312E-01
  -.1626549E-01  -.1327904E-01  -.5954512E-02   .4095079E-04   .4255894E-02
   .7747404E-02   .7773582E-02   .1034204E-02  -.9330346E-02  -.1614704E-01
  -.1698612E-01  -.1519092E-01  -.1320094E-01  -.9851872E-02  -.4154979E-02
   .2123247E-02   .6268640E-02   .7490246E-02   .6956975E-02   .6550652E-02
   .8216355E-02   .1319033E-01   .1971639E-01   .2268248E-01   .1874008E-01
   .1117228E-01   .7107694E-02   .9585462E-02   .1469048E-01   .1728078E-01
   .1668730E-01   .1502729E-01   .1320330E-01   .1057882E-01   .6757753E-02
   .2013220E-02  -.2999186E-02  -.7086686E-02  -.8824328E-02  -.7745588E-02
  -.4409454E-02   .8184328E-03   .7423010E-02   .1304046E-01   .1458854E-01
   .1173151E-01   .7531920E-02   .4971099E-02   .3892458E-02   .2121239E-02
  -.1520640E-02  -.5731669E-02  -.7948477E-02  -.6630167E-02  -.2469310E-02
   .2355518E-02   .5904088E-02   .7607394E-02   .8077040E-02   .7891346E-02
   .6792962E-02   .4473276E-02   .1208394E-02  -.1853569E-02  -.3313954E-02
  -.2714819E-02  -.7293949E-03   .1596765E-02   .3413123E-02   .4403458E-02
   .4946004E-02   .5678548E-02   .6934805E-02   .8310663E-02   .8687429E-02
   .7144871E-02   .3722812E-02  -.4224465E-03  -.3708149E-02  -.4748118E-02
  -.2933833E-02   .9084884E-03   .4919175E-02   .7338585E-02   .7700721E-02
   .7101789E-02   .7079566E-02   .7826349E-02   .7700602E-02   .5331979E-02
   .1265031E-02  -.2645733E-02  -.5049778E-02  -.6371467E-02  -.7782220E-02
  -.9554079E-02  -.1099689E-01  -.1144302E-01  -.1056326E-01  -.8330387E-02
  -.5393621E-02  -.3069732E-02  -.2323072E-02  -.3054036E-02  -.4510109E-02
  -.5633999E-02  -.5904460E-02  -.5858084E-02  -.6508648E-02  -.8253859E-02
  -.1046418E-01  -.1232492E-01  -.1358508E-01  -.1425396E-01  -.1435894E-01
  -.1382210E-01  -.1255936E-01  -.1084941E-01  -.9261555E-02  -.8260915E-02
  -.8156335E-02  -.8782421E-02  -.9695912E-02  -.1057510E-01  -.1115836E-01
  -.1106195E-01  -.1025163E-01  -.9321130E-02  -.8822608E-02  -.8645903E-02
  -.8112796E-02  -.6841569E-02  -.5176966E-02  -.3709538E-02  -.2438212E-02
  -.1064671E-02   .2853875E-03   .1111884E-02   .1052924E-02   .3763690E-03
  -.3930625E-03  -.8961592E-03  -.1117408E-02  -.1111118E-02  -.8285426E-03
  -.6921285E-04   .1294673E-02   .2972883E-02   .4224002E-02   .4475235E-02
   .3769769E-02   .2729417E-02   .2245427E-02   .2647970E-02   .3479976E-02
   .3977415E-02   .3817912E-02   .3534820E-02   .3775527E-02   .4170661E-02
   .3959500E-02   .2995425E-02   .1611461E-02   .4669877E-03   .1224097E-03
   .6196822E-03   .1301190E-02   .1425002E-02   .9385533E-03   .1300914E-03
  -.6576337E-03  -.1115317E-02  -.1261300E-02  -.1294758E-02  -.1302013E-02
  -.1290033E-02  -.1357868E-02  -.1494452E-02  -.1262292E-02  -.3728703E-03
   .6419994E-03   .1162295E-02   .1123845E-02   .6203583E-03  -.4002672E-03
  -.1668255E-02  -.2924033E-02  -.4194570E-02  -.5368251E-02  -.6138989E-02
  -.6359957E-02  -.6055114E-02  -.5590766E-02  -.5570323E-02  -.6108741E-02
  -.7216387E-02  -.8753613E-02  -.1036531E-01  -.1178659E-01  -.1256692E-01
  -.1224065E-01  -.1101603E-01  -.9831436E-02  -.9636364E-02  -.1049158E-01
  -.1176409E-01  -.1277030E-01  -.1335613E-01  -.1368162E-01  -.1373831E-01
  -.1336881E-01  -.1245390E-01  -.1115957E-01  -.1007949E-01  -.9519463E-02
  -.9326942E-02  -.9298866E-02  -.9182059E-02  -.8823278E-02  -.8353418E-02
  -.7825776E-02  -.6856435E-02  -.5389968E-02  -.3837269E-02  -.2494270E-02
  -.1446512E-02  -.9195231E-03  -.1147126E-02  -.2150829E-02  -.3636946E-02
  -.5271429E-02  -.6780316E-02  -.7965732E-02  -.8686885E-02  -.8892722E-02
  -.8489482E-02  -.7205145E-02  -.5092480E-02  -.2947890E-02  -.1607534E-02
  -.1401572E-02  -.1935430E-02  -.2495279E-02  -.2930876E-02  -.3657331E-02
  -.4877788E-02  -.6258335E-02  -.7232678E-02  -.7435214E-02  -.6770896E-02
  -.5674053E-02  -.4833693E-02  -.4634513E-02  -.5106796E-02  -.5992188E-02
  -.6992037E-02  -.7929092E-02  -.8758522E-02  -.9345195E-02  -.9441573E-02
  -.9111128E-02  -.8787812E-02  -.8685928E-02  -.8583156E-02  -.8092938E-02
  -.7144692E-02  -.5957318E-02  -.4836386E-02  -.3932422E-02  -.3112941E-02
  -.2375453E-02  -.1687802E-02  -.1285992E-02  -.1413056E-02  -.1989407E-02
  -.2797158E-02  -.3479259E-02  -.3843304E-02  -.3759680E-02  -.3169090E-02
  -.2290035E-02  -.1655405E-02  -.1541594E-02  -.1793169E-02  -.2306465E-02
  -.3002726E-02  -.3627485E-02  -.4191900E-02  -.4688980E-02  -.4978731E-02
  -.4987058E-02  -.4798410E-02  -.4378202E-02  -.3696620E-02  -.2957067E-02
  -.2424205E-02  -.2147357E-02  -.1876056E-02  -.1405339E-02  -.8088861E-03
  -.3029511E-03  -.6016660E-04  -.1741556E-03  -.4487483E-03  -.6737196E-03
  -.6748461E-03  -.3565661E-03   .2351634E-03   .1089782E-02   .2106540E-02
   .2955785E-02   .3351520E-02   .3144157E-02   .2453725E-02   .1704081E-02
   .1240950E-02   .1152005E-02   .1480195E-02   .1889093E-02   .1857551E-02
   .1362747E-02   .7671130E-03   .4759712E-03   .6066396E-03   .9262403E-03
   .1149030E-02   .1371756E-02   .1806855E-02   .2219803E-02   .2390173E-02
   .2319417E-02   .2178122E-02   .2282139E-02   .2848704E-02   .3573937E-02
   .3936312E-02   .3622810E-02   .2906334E-02   .2278136E-02   .1758910E-02
   .1098638E-02   .1708453E-03  -.9882383E-03  -.2330517E-02  -.3687824E-02
  -.4835454E-02  -.5502599E-02  -.5680094E-02  -.5690878E-02  -.5665026E-02
  -.5598676E-02  -.5595279E-02  -.5567272E-02  -.5474204E-02  -.5421267E-02
  -.5154806E-02  -.4443270E-02  -.3451834E-02  -.2376481E-02  -.1520916E-02
  -.1295615E-02  -.1773631E-02  -.2731725E-02  -.3660901E-02  -.4083181E-02
  -.3962265E-02  -.3650177E-02  -.3582167E-02  -.3916200E-02  -.4405782E-02
  -.4393075E-02  -.3485928E-02  -.2107260E-02  -.1049890E-02  -.8222378E-03
  -.1398715E-02  -.2411409E-02  -.3271772E-02  -.3584502E-02  -.3291728E-02
  -.2829562E-02  -.2583030E-02  -.2435981E-02  -.2046932E-02  -.1062009E-02
   .3332529E-03   .1456549E-02   .1767312E-02   .1242259E-02   .3747139E-03
  -.3284360E-03  -.5736158E-03  -.3708185E-03   .2943678E-04   .1820501E-03
  -.1337075E-03  -.7451535E-03  -.1223329E-02  -.1241831E-02  -.1145293E-02
  -.1547456E-02  -.2671233E-02  -.4131745E-02  -.5282326E-02  -.5564803E-02
  -.4933120E-02  -.3963030E-02  -.3209833E-02  -.2697542E-02  -.2150949E-02
  -.1330430E-02  -.1535330E-03   .1185691E-02   .2222885E-02   .2593582E-02
   .2396615E-02   .2123598E-02   .2097078E-02   .2392544E-02   .2790618E-02
   .3108090E-02   .3173739E-02   .3005139E-02   .3114193E-02   .3935761E-02
   .5244072E-02   .6392914E-02   .6839508E-02   .6387628E-02   .5593971E-02
   .5171133E-02   .5213954E-02   .5430227E-02   .5731887E-02   .6037400E-02
   .6140958E-02   .6146559E-02   .6291577E-02   .6547761E-02   .6828027E-02
   .7057188E-02   .6816364E-02   .6110395E-02   .5568130E-02   .5432075E-02
   .5460346E-02   .5436499E-02   .5088361E-02   .4186978E-02   .2891317E-02
   .1679964E-02   .8476547E-03   .3641536E-03  -.2362115E-04  -.3448558E-03
  -.3900783E-03   .6982965E-04   .9345237E-03   .1898032E-02   .2637643E-02
   .2806619E-02   .2545491E-02   .2201813E-02   .1890604E-02   .1560087E-02
   .1211755E-02   .8051794E-03   .2189503E-03  -.4219749E-03  -.9901148E-03
  -.1619980E-02  -.2241996E-02  -.2602487E-02  -.2779870E-02  -.2965635E-02
  -.3268503E-02  -.3716614E-02  -.4113593E-02  -.4174043E-02  -.3884469E-02
  -.3599182E-02  -.3522494E-02  -.3650630E-02  -.4029141E-02  -.4633568E-02
  -.5485521E-02  -.6464352E-02  -.7355397E-02  -.7817689E-02  -.7645587E-02
  -.7225778E-02  -.7047329E-02  -.7139911E-02  -.7269258E-02  -.7361847E-02
  -.7491217E-02  -.7772368E-02  -.8326529E-02  -.9210187E-02  -.1016092E-01
  -.1080617E-01  -.1091469E-01  -.1068484E-01  -.1039203E-01  -.1001332E-01
  -.9347018E-02  -.8417705E-02  -.7339652E-02  -.6174185E-02  -.4952727E-02
  -.3774679E-02  -.2671436E-02  -.1847370E-02  -.1512760E-02  -.1496391E-02
  -.1419881E-02  -.1268849E-02  -.1525239E-02  -.2408035E-02  -.3758552E-02
  -.4949307E-02  -.5523256E-02  -.5450244E-02  -.4920672E-02  -.4169058E-02
  -.3447203E-02  -.2830619E-02  -.2254511E-02  -.1696876E-02  -.1183629E-02
  -.9320030E-03  -.1040261E-02  -.1350853E-02  -.1862073E-02  -.2685937E-02
  -.3812128E-02  -.4919188E-02  -.5609551E-02  -.5822316E-02  -.5742109E-02
  -.5730675E-02  -.5910574E-02  -.6200062E-02  -.6614232E-02  -.7094724E-02
  -.7499647E-02  -.7841128E-02  -.8046306E-02  -.7909159E-02  -.7510439E-02
  -.6892713E-02  -.6129974E-02  -.5277712E-02  -.4412069E-02  -.3608732E-02
  -.2909171E-02  -.2336326E-02  -.1869790E-02  -.1386392E-02  -.8117858E-03
  -.2369209E-03   .4736085E-03   .1245219E-02   .1699981E-02   .1538680E-02
   .3702477E-03  -.1603409E-02  -.3477736E-02  -.4269475E-02  -.3533936E-02
  -.1872201E-02  -.6730272E-03  -.7088441E-03  -.1633093E-02  -.2294126E-02
  -.2029407E-02  -.1198958E-02  -.6423259E-03  -.9915339E-03  -.1912022E-02
  -.2204999E-02  -.1286277E-02   .2412109E-04   .5152279E-03   .4583858E-04
  -.4166203E-03  -.2320006E-04   .1373144E-02   .3231411E-02   .4840555E-02
   .5755574E-02   .5992445E-02   .5810843E-02   .5334774E-02   .4586791E-02
   .3688019E-02   .2841466E-02   .2292754E-02   .2207565E-02   .2462072E-02
   .2633722E-02   .2360544E-02   .1864958E-02   .1703622E-02   .2078747E-02
   .2860200E-02   .3653597E-02   .4031521E-02   .3952904E-02   .3798660E-02
   .3671781E-02   .3199513E-02   .2092130E-02   .7055375E-03  -.2673718E-03
  -.5795369E-03  -.6231163E-03  -.1011713E-02  -.1863140E-02  -.2658274E-02
  -.2989856E-02  -.2949614E-02  -.2901233E-02  -.3073309E-02  -.3379323E-02
  -.3452574E-02  -.3244973E-02  -.3060368E-02  -.3043815E-02  -.3001908E-02
  -.2650936E-02  -.2156513E-02  -.1827287E-02  -.1656496E-02  -.1497408E-02
  -.1488213E-02  -.1842926E-02  -.2552929E-02  -.3463665E-02  -.4077314E-02
  -.4014954E-02  -.3143752E-02  -.1624817E-02   .2931614E-04   .1286413E-02
   .1929451E-02   .2022647E-02   .1810328E-02   .1553170E-02   .1235511E-02
   .8269367E-03   .6065540E-03   .1038446E-02   .2115763E-02   .3349825E-02
   .4247652E-02   .4518572E-02   .4315037E-02   .4004859E-02   .3682400E-02
   .3316429E-02   .3061548E-02   .2855071E-02   .2376819E-02   .1752674E-02
   .1177926E-02   .7713125E-03   .5835832E-03   .5223569E-03   .4448505E-03
   .1551462E-03  -.3489464E-03  -.8230946E-03  -.1057999E-02  -.1271293E-02
  -.1657741E-02  -.1924177E-02  -.1671115E-02  -.8849317E-03   .1102604E-03
   .9702123E-03   .1600132E-02   .2055412E-02   .2229664E-02   .2084900E-02
   .1890755E-02   .2035761E-02   .2499244E-02   .2988612E-02   .3576642E-02
   .4448387E-02   .5341511E-02   .5763645E-02   .5712096E-02   .5509803E-02
   .5393702E-02   .5474662E-02   .5815898E-02   .6267436E-02   .6466336E-02
   .6053739E-02   .5123709E-02   .4047361E-02   .3107501E-02   .2447696E-02
   .2026933E-02   .1701511E-02   .1442427E-02   .1218756E-02   .1153806E-02
   .1299881E-02   .1521776E-02   .1828583E-02   .2280997E-02   .2588895E-02
   .2279027E-02   .1363327E-02   .1699514E-03  -.1061496E-02  -.2125818E-02
  -.2857889E-02  -.3262481E-02  -.3449583E-02  -.3537326E-02  -.3629040E-02
  -.3905365E-02  -.4424992E-02  -.4967300E-02  -.5244958E-02  -.5130111E-02
  -.4884246E-02  -.4776543E-02  -.4751680E-02  -.4825474E-02  -.5051395E-02
  -.5099348E-02  -.4718233E-02  -.4097793E-02  -.3544795E-02  -.3124268E-02
  -.2663950E-02  -.2131418E-02  -.1587411E-02  -.1122416E-02  -.1043993E-02
  -.1362993E-02  -.1741969E-02  -.2010025E-02  -.2297979E-02  -.2784763E-02
  -.3529671E-02  -.4366931E-02  -.5084318E-02  -.5566434E-02  -.5707665E-02
  -.5432326E-02  -.4982145E-02  -.4695374E-02  -.4857450E-02  -.5436231E-02
  -.6158716E-02  -.7012134E-02  -.7920417E-02  -.8648461E-02  -.8912125E-02
  -.8667877E-02  -.8039826E-02  -.7069860E-02  -.6013846E-02  -.5131921E-02
  -.4602783E-02  -.4496052E-02  -.4725803E-02  -.5061959E-02  -.5396453E-02
  -.5841753E-02  -.6380936E-02  -.6938566E-02  -.7428625E-02  -.7737313E-02
  -.7909283E-02  -.8136013E-02  -.8546307E-02  -.8889424E-02  -.8914437E-02
  -.8688175E-02  -.8274888E-02  -.7649560E-02  -.6991715E-02  -.6433073E-02
  -.6014585E-02  -.5803739E-02  -.5734260E-02  -.5723146E-02  -.5702733E-02
  -.5561287E-02  -.5266078E-02  -.4979641E-02  -.4811509E-02  -.4841120E-02
  -.5011274E-02  -.5279982E-02  -.5658660E-02  -.5997147E-02  -.6166708E-02
  -.6280514E-02  -.6354714E-02  -.6136939E-02  -.5205784E-02  -.3512598E-02
  -.2631166E-02  -.4389130E-02  -.7517385E-02  -.8035391E-02  -.4160921E-02
   .1020116E-02   .3156985E-02   .1446051E-02  -.1302140E-02  -.2263697E-02
  -.1243602E-02   .2408155E-03   .1340148E-02   .2078334E-02   .2213259E-02
   .1588414E-02   .6192798E-03  -.4726083E-03  -.1671909E-02  -.2479444E-02
  -.2380506E-02  -.1963908E-02  -.2156451E-02  -.2528608E-02  -.1990466E-02
  -.5567880E-03   .2825209E-03  -.4592788E-03  -.1932539E-02  -.2412074E-02
  -.1363443E-02   .1527941E-03   .9379985E-03   .6902460E-03  -.1323786E-04
  -.3460997E-03   .2885192E-03   .1806605E-02   .3159338E-02   .3545497E-02
   .3266054E-02   .3109125E-02   .3137255E-02   .3140688E-02   .3425102E-02
   .4004712E-02   .4346752E-02   .4295906E-02   .4440577E-02   .5271783E-02
   .6354862E-02   .6885270E-02   .6677555E-02   .6318331E-02   .6244725E-02
   .6113334E-02   .5535114E-02   .4691758E-02   .4183952E-02   .4469555E-02
   .4951739E-02   .4531798E-02   .3037854E-02   .1584296E-02   .1365944E-02
   .2273211E-02   .3172776E-02   .3281545E-02   .3038107E-02   .3181289E-02
   .3697182E-02   .4190122E-02   .4544788E-02   .4865477E-02   .5156696E-02
   .5506957E-02   .6029581E-02   .6557263E-02   .6739503E-02   .6493147E-02
   .6124735E-02   .6085355E-02   .6498266E-02   .6956982E-02   .6868745E-02
   .6210780E-02   .5664567E-02   .6050390E-02   .7411339E-02   .8870555E-02
   .9655891E-02   .9720334E-02   .9370544E-02   .8783116E-02   .8006572E-02
   .7144922E-02   .6134818E-02   .5083431E-02   .4361161E-02   .4078731E-02
   .3997139E-02   .3857966E-02   .3565878E-02   .3326458E-02   .3315823E-02
   .3143800E-02   .2403450E-02   .1447729E-02   .9169415E-03   .1216836E-02
   .2144283E-02   .2815730E-02   .2506460E-02   .1328488E-02   .2313767E-03
   .1413600E-03   .1001691E-02   .1833750E-02   .2051612E-02   .1928059E-02
   .2126886E-02   .3024975E-02   .4295599E-02   .5527745E-02   .6611863E-02
   .7323109E-02   .7488669E-02   .7163219E-02   .6660371E-02   .6349628E-02
   .6231594E-02   .6113896E-02   .5789973E-02   .5193253E-02   .4492828E-02
   .4143907E-02   .4370481E-02   .4807630E-02   .5227688E-02   .5525948E-02
   .5699013E-02   .5613029E-02   .5348340E-02   .5330401E-02   .5592852E-02
   .5815397E-02   .5859736E-02   .5796231E-02   .5878770E-02   .6254047E-02
   .6740500E-02   .7034627E-02   .6899259E-02   .6418759E-02   .5668164E-02
   .4809601E-02   .4057822E-02   .3354227E-02   .2774969E-02   .2446020E-02
   .2271076E-02   .1942767E-02   .1344654E-02   .7416128E-03   .3729029E-03
   .2957913E-03   .4647567E-03   .8472754E-03   .1423366E-02   .2064507E-02
   .2620034E-02   .2812722E-02   .2499510E-02   .1850449E-02   .1126288E-02
   .5105088E-03   .3901903E-04  -.9269990E-04   .3949704E-03   .1225803E-02
   .1687392E-02   .1500595E-02   .1174670E-02   .1246567E-02   .1705533E-02
   .2012753E-02   .1303306E-02  -.7606667E-03  -.2180469E-02  -.2832202E-03
   .4479812E-02   .8129113E-02   .7602896E-02   .4514893E-02   .2657115E-02
   .3098064E-02   .3840368E-02   .3494950E-02   .2887632E-02   .2825101E-02
   .2704414E-02   .2103894E-02   .1934863E-02   .2891571E-02   .4236058E-02
   .4892025E-02   .4680594E-02   .4158435E-02   .3554805E-02   .2872427E-02
   .2282564E-02   .1736737E-02   .9592698E-03  -.1141506E-03  -.1213035E-02
  -.1719494E-02  -.1200320E-02   .2349378E-03   .1935087E-02   .3052458E-02
   .3183215E-02   .2651457E-02   .2386587E-02   .2900872E-02   .3614733E-02
   .3640927E-02   .3010040E-02   .2536713E-02   .2662005E-02   .3255717E-02
   .4022176E-02   .4594610E-02   .4587281E-02   .3944992E-02   .3040336E-02
   .2648111E-02   .3112131E-02   .3830771E-02   .4133910E-02   .3915844E-02
   .3344997E-02   .2654482E-02   .1938539E-02   .1377101E-02   .1031484E-02
   .8101013E-03   .8382848E-03   .1275652E-02   .2076108E-02   .3052657E-02
   .4153493E-02   .5043193E-02   .5397540E-02   .5216288E-02   .4801716E-02
   .4595869E-02   .4954410E-02   .5761094E-02   .6404687E-02   .6350606E-02
   .5865750E-02   .5597428E-02   .5848539E-02   .6479925E-02   .7276918E-02
   .8132844E-02   .8674068E-02   .8548383E-02   .7816038E-02   .6984795E-02
   .6435036E-02   .6210432E-02   .6158518E-02   .6255851E-02   .6576618E-02
   .7112505E-02   .7613739E-02   .7726217E-02   .7506909E-02   .7257877E-02
   .7138343E-02   .7048983E-02   .6807650E-02   .6455244E-02   .6169569E-02
   .5923889E-02   .5636963E-02   .5351228E-02   .4978331E-02   .4648671E-02
   .4457043E-02   .4331917E-02   .4271013E-02   .4175398E-02   .3937283E-02
   .3628167E-02   .3228437E-02   .2563098E-02   .1553361E-02   .5889418E-03
   .9452095E-04  -.4536073E-04  -.1819225E-03  -.4880790E-03  -.8355978E-03
  -.1236079E-02  -.1789540E-02  -.2432767E-02  -.2988667E-02  -.3227748E-02
  -.3154001E-02  -.2976611E-02  -.2843625E-02  -.2744072E-02  -.2545788E-02
  -.2194661E-02  -.1763938E-02  -.1282660E-02  -.9567174E-03  -.1170233E-02
  -.1845268E-02  -.2518272E-02  -.2710791E-02  -.2229373E-02  -.1397946E-02
  -.7113421E-03  -.3323237E-03  -.2658620E-03  -.4814862E-03  -.7144568E-03
  -.8664618E-03  -.1032990E-02  -.1223395E-02  -.1433886E-02  -.1761837E-02
  -.2201608E-02  -.2383474E-02  -.2282258E-02  -.1990284E-02  -.1601025E-02
  -.1115223E-02  -.2576632E-03   .6391296E-03   .1159304E-02   .1256516E-02
   .1077851E-02   .6087985E-03  -.1757051E-03  -.9681076E-03  -.1553537E-02
  -.1843930E-02  -.1985598E-02  -.2127135E-02  -.2197771E-02  -.2197413E-02
  -.2187202E-02  -.2003644E-02  -.1414031E-02  -.2928806E-03   .1187450E-02
   .2681113E-02   .3741668E-02   .4159611E-02   .4106710E-02   .3797191E-02
   .3420355E-02   .3162333E-02   .2957274E-02   .2801521E-02   .2759948E-02
   .2806028E-02   .3002358E-02   .3343405E-02   .3540152E-02   .3434859E-02
   .3065052E-02   .2736592E-02   .2801060E-02   .3236625E-02   .3683179E-02
   .3896919E-02   .4005252E-02   .4293959E-02   .4763292E-02   .5056614E-02
   .4694688E-02   .3637544E-02   .2493457E-02   .1594716E-02   .9410583E-03
   .6390307E-03   .5583142E-03   .5699138E-03   .5229562E-03   .4752252E-03
   .7198156E-03   .1209523E-02   .1564015E-02   .1565653E-02   .1260994E-02
   .7725990E-03   .2662178E-03  -.7616387E-04  -.2978305E-03  -.3663212E-03
  -.2141852E-03  -.1561521E-05   .1548633E-03   .3781043E-03   .6594942E-03
   .6687412E-03   .2910913E-03  -.3616983E-03  -.1363585E-02  -.2652568E-02
  -.3841277E-02  -.4496786E-02  -.4377322E-02  -.3646895E-02  -.2568917E-02
  -.1461734E-02  -.7344716E-03  -.4935903E-03  -.4256772E-03  -.3381651E-03
  -.1846724E-03  -.3492561E-04  -.2485676E-03  -.9025661E-03  -.1399745E-02
  -.1397984E-02  -.1075618E-02  -.6576624E-03  -.3491850E-03  -.2786336E-03
  -.5104315E-03  -.1038167E-02  -.1728414E-02  -.2531047E-02  -.3456880E-02
  -.4327190E-02  -.4757339E-02  -.4565483E-02  -.4016743E-02  -.3556171E-02
  -.3343560E-02  -.3270468E-02  -.3118375E-02  -.2836102E-02  -.2538394E-02
  -.2456600E-02  -.2792008E-02  -.3485839E-02  -.4352693E-02  -.4990545E-02
  -.5117095E-02  -.4659722E-02  -.3648877E-02  -.2365181E-02  -.1136006E-02
  -.1829695E-03   .5425438E-03   .1038836E-02   .1314501E-02   .1500017E-02
   .1311740E-02   .4068363E-03  -.1029007E-02  -.2339404E-02  -.3115021E-02
  -.3574422E-02  -.3738917E-02  -.3608799E-02  -.3335815E-02  -.2863712E-02
  -.2150132E-02  -.1257026E-02  -.3828911E-03   .1295247E-03   .1360744E-03
  -.2441454E-03  -.6658474E-03  -.8035541E-03  -.7690541E-03  -.7157514E-03
  -.5369778E-03  -.6363238E-04   .5655459E-03   .1156506E-02   .1666151E-02
   .2019288E-02   .2208187E-02   .2298808E-02   .2373548E-02   .2536428E-02
   .2825512E-02   .3008156E-02   .3028620E-02   .2906321E-02   .2669093E-02
   .2430276E-02   .2235764E-02   .2107031E-02   .2126397E-02   .2137685E-02
   .1887810E-02   .1319666E-02   .4747716E-03  -.5690639E-03  -.1662246E-02
  -.2610600E-02  -.3161815E-02  -.3294866E-02  -.3057918E-02  -.2502152E-02
  -.1752368E-02  -.1103184E-02  -.8607150E-03  -.1084641E-02  -.1752620E-02
  -.2762991E-02  -.3833020E-02  -.4731280E-02  -.5203110E-02  -.5070410E-02
  -.4439126E-02  -.3504735E-02  -.2417672E-02  -.1367980E-02  -.6885461E-03
  -.4058259E-03  -.3288185E-03  -.3582887E-03  -.5313685E-03  -.8544918E-03
  -.1233540E-02  -.1475933E-02  -.1406957E-02  -.9484401E-03  -.2969219E-03
   .2346316E-03   .9535170E-03   .2405381E-02   .4154738E-02   .4873541E-02
   .3863582E-02   .2221004E-02   .1527696E-02   .2175648E-02   .2963060E-02
   .2996401E-02   .2893655E-02   .3441360E-02   .4638474E-02   .5909852E-02
   .6691329E-02   .6909052E-02   .6845854E-02   .6713077E-02   .6134341E-02
   .4961284E-02   .3695802E-02   .2989187E-02   .2935162E-02   .3038875E-02
   .2854092E-02   .2621096E-02   .2785316E-02   .3289572E-02   .3699340E-02
   .3621067E-02   .3273314E-02   .2927386E-02   .2476254E-02   .1908404E-02
   .1516228E-02   .1508166E-02   .1770190E-02   .1941398E-02   .1858590E-02
   .1570040E-02   .1199468E-02   .6789628E-03  -.5388026E-04  -.8081502E-03
  -.1481929E-02  -.2236700E-02  -.3073382E-02  -.3844181E-02  -.4571696E-02
  -.5398056E-02  -.6142109E-02  -.6384916E-02  -.6016266E-02  -.5426169E-02
  -.4863780E-02  -.4146810E-02  -.3520936E-02  -.3323242E-02  -.3671996E-02
  -.4305649E-02  -.4796583E-02  -.5029356E-02  -.4931730E-02  -.4527576E-02
  -.4093124E-02  -.3970553E-02  -.3985160E-02  -.3906041E-02  -.3805612E-02
  -.3892900E-02  -.4244515E-02  -.4565698E-02  -.4497429E-02  -.3950443E-02
  -.3043002E-02  -.2017128E-02  -.1101934E-02  -.3916453E-03  -.3740138E-04
   .2678108E-04  -.2535676E-05   .9404816E-04   .2579256E-03   .3161163E-03
   .4241692E-03   .8588977E-03   .1512489E-02   .2049323E-02   .2366088E-02
   .2411480E-02   .2203638E-02   .1653600E-02   .6734732E-03  -.6157172E-03
  -.1788095E-02  -.2494271E-02  -.2708847E-02  -.2590486E-02  -.2195109E-02
  -.1533434E-02  -.8011413E-03  -.2067872E-03   .2088349E-03   .5708910E-03
   .1054918E-02   .1488088E-02   .1680436E-02   .1770267E-02   .1929088E-02
   .2065938E-02   .1965662E-02   .1821896E-02   .1910220E-02   .2134980E-02
   .2226522E-02   .2116152E-02   .2035642E-02   .2112862E-02   .2227096E-02
   .1992841E-02   .1162642E-02   .5376076E-04  -.1017033E-02  -.1917128E-02
  -.2410249E-02  -.2426313E-02  -.2258553E-02  -.2131988E-02  -.1876851E-02
  -.1303543E-02  -.6443919E-03  -.7865390E-04   .4690472E-03   .8784073E-03
   .9223177E-03   .7990739E-03   .8739740E-03   .1069725E-02   .1071198E-02
   .8432865E-03   .7351195E-03   .8875892E-03   .1159678E-02   .1586313E-02
   .2113900E-02   .2634778E-02   .3227280E-02   .3706780E-02   .3762889E-02
   .3509549E-02   .3203353E-02   .3032440E-02   .3112944E-02   .3294008E-02
   .3514856E-02   .3871533E-02   .4289639E-02   .4549653E-02   .4549934E-02
   .4598719E-02   .4881497E-02   .5298253E-02   .5603953E-02   .5778295E-02
   .6096163E-02   .6590390E-02   .7052625E-02   .7226147E-02   .7058880E-02
   .6584534E-02   .5996875E-02   .5539522E-02   .5151957E-02   .4643310E-02
   .4104275E-02   .3843764E-02   .3843780E-02   .3695449E-02   .3177840E-02
   .2728090E-02   .2746800E-02   .3128563E-02   .3545260E-02   .3836066E-02
   .3945695E-02   .4090516E-02   .4486003E-02   .5072288E-02   .5541140E-02
   .5788596E-02   .5930785E-02   .5982999E-02   .6054069E-02   .6090236E-02
   .5996377E-02   .5785156E-02   .5549755E-02   .5406040E-02   .5157793E-02
   .4402254E-02   .3145277E-02   .1853734E-02   .9268146E-03   .5493056E-03
   .6153636E-03   .7256200E-03   .6486861E-03   .4005550E-03   .2733540E-03
   .4366531E-03   .7244838E-03   .9352518E-03   .8700518E-03   .4760884E-03
  -.1474913E-03  -.8166672E-03  -.1391157E-02  -.1716970E-02  -.1569007E-02
  -.8081731E-03   .2169917E-03   .9038287E-03   .1145805E-02   .1129604E-02
   .9977247E-03   .7099616E-03   .2950361E-03  -.1602665E-03  -.8509248E-03
  -.1864676E-02  -.2803271E-02  -.3269427E-02  -.3273706E-02  -.2821506E-02
  -.1960454E-02  -.9608590E-03  -.2149453E-03   .7596425E-04  -.3158753E-04
  -.4056916E-03  -.9923183E-03  -.1467785E-02  -.1742825E-02  -.1881512E-02
  -.1738457E-02  -.1386009E-02  -.1030193E-02  -.8059286E-03  -.6704708E-03
  -.5153961E-03  -.3444384E-03  -.1797397E-03  -.1014056E-03   .1349082E-04
   .1856566E-03   .2699494E-03   .1610444E-03  -.8996983E-04  -.2423383E-03
  -.1603764E-03   .9142407E-04   .4883798E-03   .8915459E-03   .1039910E-02
   .8999460E-03   .6061736E-03   .3985060E-03   .4148040E-03   .5817320E-03
   .8759588E-03   .1292840E-02   .1658157E-02   .1932903E-02   .2075157E-02
   .2051456E-02   .1854486E-02   .1492263E-02   .1152334E-02   .1116411E-02
   .1449962E-02   .2010744E-02   .2491812E-02   .2420289E-02   .1796723E-02
   .1023513E-02   .4127932E-03  -.1044642E-04  -.3190653E-03  -.4212862E-03
  -.3489926E-03  -.3064515E-03  -.3558950E-03  -.4550955E-03  -.2756822E-03
   .1156055E-03   .4171151E-03   .5188657E-03   .3889741E-03   .1367421E-03
  -.1051548E-03  -.3412268E-03  -.7253464E-03  -.1295902E-02  -.1964279E-02
  -.2594353E-02  -.2974056E-02  -.2975013E-02  -.2591741E-02  -.2016773E-02
  -.1570489E-02  -.1382554E-02  -.1427038E-02  -.1620859E-02  -.1958205E-02
  -.2438180E-02  -.3114606E-02  -.4023639E-02  -.4999272E-02  -.5790186E-02
  -.6332930E-02  -.6761324E-02  -.7153631E-02  -.7480243E-02  -.7712416E-02
  -.7797515E-02  -.7726067E-02  -.7631443E-02  -.7645105E-02  -.7769116E-02
  -.7998472E-02  -.8299059E-02  -.8490182E-02  -.8176458E-02  -.7619868E-02
  -.7364391E-02  -.7445203E-02  -.7529348E-02  -.7365419E-02  -.6835864E-02
  -.6093811E-02  -.5271380E-02  -.4271822E-02  -.3110882E-02  -.2227277E-02
  -.1955230E-02  -.2353936E-02  -.3185229E-02  -.3888066E-02  -.4291588E-02
  -.4452120E-02  -.4409534E-02  -.4098184E-02  -.3564884E-02  -.3025551E-02
  -.2730525E-02  -.2713625E-02  -.2798933E-02  -.2863340E-02  -.2843512E-02
  -.2623801E-02  -.2276865E-02  -.1945271E-02  -.1777681E-02  -.1817205E-02
  -.1951334E-02  -.2258230E-02  -.2765400E-02  -.3161331E-02  -.3343041E-02
  -.3610810E-02  -.4027956E-02  -.4421937E-02  -.4650370E-02  -.4595630E-02
  -.4425681E-02  -.4462804E-02  -.4686917E-02  -.4764378E-02  -.4433817E-02
  -.3610509E-02  -.2488455E-02  -.1366605E-02  -.3642599E-03   .5413387E-03
   .1442263E-02   .2309174E-02   .3035808E-02   .3634083E-02   .4010455E-02
   .3919521E-02   .3544654E-02   .3311895E-02   .3380528E-02   .3820439E-02
   .4322953E-02   .4360922E-02   .3909964E-02   .3192840E-02   .2207486E-02
   .1113372E-02   .2001674E-03  -.4522674E-03  -.8238950E-03  -.8969323E-03
  -.7913749E-03  -.8423376E-03  -.1157439E-02  -.1351993E-02  -.1267420E-02
  -.1033300E-02  -.5827841E-03  -.7299644E-04   .3147175E-03   .4584768E-03
   .5044567E-03   .6360273E-03   .8319177E-03   .9584553E-03   .1117468E-02
   .1453026E-02   .1839025E-02   .2177918E-02   .2624249E-02   .3194534E-02
   .3550874E-02   .3536105E-02   .3278482E-02   .2787398E-02   .1960231E-02
   .1030646E-02   .3155848E-03  -.2636987E-03  -.7812156E-03  -.1152633E-02
  -.1360549E-02  -.1447818E-02  -.1518784E-02  -.1717449E-02  -.1873720E-02
  -.1664624E-02  -.1254309E-02  -.9083404E-03  -.7376531E-03  -.6110946E-03
  -.3288848E-03   .1960032E-03   .8815374E-03   .1511649E-02   .1944748E-02
   .2050409E-02   .1728447E-02   .1007359E-02   .8394650E-04  -.7210786E-03
  -.1292670E-02  -.1654180E-02  -.1838785E-02  -.1939880E-02  -.2007305E-02
  -.2119621E-02  -.2290022E-02  -.2474291E-02  -.2743214E-02  -.3093910E-02
  -.3370712E-02  -.3398483E-02  -.2993820E-02  -.2227143E-02  -.1433201E-02
  -.6493408E-03   .7632170E-04   .5991976E-03   .9464850E-03   .1136444E-02
   .1083386E-02   .8964714E-03   .9701665E-03   .1420291E-02   .1781997E-02
   .1599050E-02   .9233848E-03   .2467449E-03  -.3293482E-04  -.1127409E-03
  -.1379757E-03  -.1089723E-03  -.4329064E-04   .9299510E-04   .3881615E-03
   .7664085E-03   .8854912E-03   .6217508E-03   .2729343E-03   .8221527E-04
   .8426505E-05  -.2260343E-03  -.5025200E-03  -.4855423E-03  -.2701212E-03
  -.6605382E-04   .1246952E-03   .1297013E-03  -.1941963E-03  -.5781479E-03
  -.6456845E-03  -.2602186E-03   .3451917E-03   .7070947E-03   .6246098E-03
   .2540282E-03  -.1041591E-03  -.2718311E-03  -.1378865E-03   .3153440E-03
   .8985185E-03   .1162440E-02   .9757518E-03   .5899149E-03   .3474836E-03
   .3707816E-03   .5498334E-03   .6558293E-03   .6113913E-03   .4426426E-03
   .2668963E-03   .3156762E-03   .5582642E-03   .9481690E-03   .1428015E-02
   .1805752E-02   .2147880E-02   .2450742E-02   .2796239E-02   .3250642E-02
   .3460001E-02   .3148066E-02   .2526053E-02   .1885865E-02   .1420147E-02
   .1262014E-02   .1416225E-02   .1654939E-02   .1734643E-02   .1525974E-02
   .9819361E-03   .4150188E-03   .3052679E-03   .6822910E-03   .1225350E-02
   .1513403E-02   .1256741E-02   .3972745E-03  -.6619561E-03  -.1368254E-02
  -.1501772E-02  -.1327865E-02  -.1316913E-02  -.1633693E-02  -.1911156E-02
  -.1483779E-02   .8335873E-04   .2541263E-02   .4715300E-02   .5391246E-02
   .4219104E-02   .2217539E-02   .8877416E-03   .8575305E-03   .1744084E-02
   .2432039E-02   .2262534E-02   .1672740E-02   .1295751E-02   .1562649E-02
   .2436067E-02   .3335674E-02   .3574287E-02   .2912889E-02   .1491884E-02
   .1126836E-03  -.3422213E-03  -.4196127E-04   .1050346E-03  -.2731490E-03
  -.7165302E-03  -.6410692E-03  -.5804724E-04   .5536638E-03   .8189820E-03
   .5668094E-03  -.7465602E-04  -.6750373E-03  -.9315737E-03  -.1132915E-02
  -.1534328E-02  -.1761268E-02  -.1411997E-02  -.7428477E-03  -.4139174E-03
  -.7141729E-03  -.1444683E-02  -.2139685E-02  -.2562100E-02  -.2922330E-02
  -.3351028E-02  -.3777099E-02  -.4055634E-02  -.4258811E-02  -.4574142E-02
  -.4969957E-02  -.5228243E-02  -.5135745E-02  -.4861405E-02  -.4687735E-02
  -.4641095E-02  -.4684465E-02  -.4896636E-02  -.5571331E-02  -.6655291E-02
  -.7588634E-02  -.8023053E-02  -.8123345E-02  -.8061036E-02  -.7797521E-02
  -.7242515E-02  -.6565976E-02  -.6154325E-02  -.6205540E-02  -.6618022E-02
  -.7067092E-02  -.7438500E-02  -.7708234E-02  -.7726102E-02  -.7335619E-02
  -.6601543E-02  -.5710848E-02  -.4891827E-02  -.4519777E-02  -.4615964E-02
  -.5064381E-02  -.5484744E-02  -.5604076E-02  -.5384906E-02  -.4875675E-02
  -.4468796E-02  -.4350777E-02  -.4267579E-02  -.3842133E-02  -.3092890E-02
  -.2530953E-02  -.2561082E-02  -.2987649E-02  -.3288892E-02  -.3211790E-02
  -.2784344E-02  -.2151936E-02  -.1526168E-02  -.1055986E-02  -.8157865E-03
  -.8286350E-03  -.1016097E-02  -.1106192E-02  -.9183535E-03  -.4309016E-03
   .1203122E-03   .4395159E-03   .5260300E-03   .6131289E-03   .8350885E-03
   .1221046E-02   .1786043E-02   .2539447E-02   .3259936E-02   .3512526E-02
   .3208009E-02   .2816058E-02   .2700367E-02   .2891244E-02   .3186747E-02
   .3403507E-02   .3491931E-02   .3240490E-02   .2810087E-02   .2569818E-02
   .2631028E-02   .2902252E-02   .3017473E-02   .2693950E-02   .2163345E-02
   .1786124E-02   .1554749E-02   .1452542E-02   .1467732E-02   .1514261E-02
   .1377255E-02   .1235022E-02   .1452243E-02   .1945079E-02   .2403413E-02
   .2446894E-02   .1843135E-02   .7745588E-03  -.2272736E-03  -.9030148E-03
  -.1192368E-02  -.1078400E-02  -.8533201E-03  -.8215072E-03  -.1078165E-02
  -.1454229E-02  -.1742223E-02  -.1833353E-02  -.1707159E-02  -.1471528E-02
  -.1369466E-02  -.1412129E-02  -.1470347E-02  -.1542948E-02  -.1526962E-02
  -.1292522E-02  -.8592070E-03  -.3939612E-03  -.2488814E-03  -.5077151E-03
  -.1109393E-02  -.1873282E-02  -.2565382E-02  -.3055570E-02  -.3277340E-02
  -.3188963E-02  -.2901753E-02  -.2454276E-02  -.1907660E-02  -.1400820E-02
  -.9343676E-03  -.6735848E-03  -.5747422E-03  -.5919496E-03  -.7029466E-03
  -.8002462E-03  -.7807679E-03  -.6200134E-03  -.4635368E-03  -.4253922E-03
  -.4944977E-03  -.5626785E-03  -.5727765E-03  -.5276256E-03  -.5933254E-03
  -.8940751E-03  -.1180243E-02  -.1196634E-02  -.9914215E-03  -.6534983E-03
  -.1773942E-03   .3558426E-03   .7304255E-03   .9399123E-03   .9938924E-03
   .9559023E-03   .9134086E-03   .8151605E-03   .5193708E-03  -.1007184E-03
  -.1020682E-02  -.1935835E-02  -.2448741E-02  -.2476031E-02  -.2195403E-02
  -.1844315E-02  -.1615658E-02  -.1588750E-02  -.1513821E-02  -.1172663E-02
  -.6979371E-03  -.2323217E-03   .1525758E-03   .3074536E-03   .2510223E-03
   .2851336E-03   .5491920E-03   .9868375E-03   .1429457E-02   .1612152E-02
   .1628986E-02   .1627536E-02   .1531017E-02   .1197806E-02   .6443128E-03
   .1636288E-03   .1029511E-04   .1948265E-04  -.1517912E-04  -.3020015E-03
  -.9389224E-03  -.1474271E-02  -.1695601E-02  -.1621635E-02  -.1329106E-02
  -.8518856E-03  -.1548344E-03   .7281379E-03   .1587157E-02   .2186917E-02
   .2539346E-02   .2742353E-02   .2835824E-02   .2820224E-02   .2745476E-02
   .2580431E-02   .2299230E-02   .2112039E-02   .2078713E-02   .1909049E-02
   .1577993E-02   .1388961E-02   .1436971E-02   .1574794E-02   .1730699E-02
   .1820068E-02   .1719274E-02   .1402529E-02   .1046249E-02   .8066476E-03
   .6805380E-03   .5510885E-03   .2013005E-03  -.2297060E-03  -.5822763E-03
  -.8697079E-03  -.9811732E-03  -.7484004E-03  -.2373329E-03   .2151438E-03
   .4533408E-03   .7388059E-03   .1128421E-02   .1463984E-02   .1806701E-02
   .2071886E-02   .2094680E-02   .1968564E-02   .1869338E-02   .1801398E-02
   .1666747E-02   .1448853E-02   .1259897E-02   .1250973E-02   .1322770E-02
   .1518384E-02   .1879936E-02   .2123293E-02   .2046203E-02   .1582908E-02
   .8751995E-03   .1927021E-03  -.3480661E-03  -.6532268E-03  -.8503226E-03
  -.1050725E-02  -.1160037E-02  -.1161984E-02  -.1111524E-02  -.1057962E-02
  -.1097954E-02  -.1261322E-02  -.1451902E-02  -.1650490E-02  -.1720273E-02
  -.1622728E-02  -.1601479E-02  -.1819711E-02  -.2167852E-02  -.2573147E-02
  -.3023431E-02  -.3522244E-02  -.3976781E-02  -.4170785E-02  -.3988876E-02
  -.3567773E-02  -.3266669E-02  -.3253062E-02  -.3538406E-02  -.4000351E-02
  -.4507653E-02  -.5059935E-02  -.5574910E-02  -.6032381E-02  -.6458429E-02
  -.6992322E-02  -.7675375E-02  -.8396591E-02  -.8880287E-02  -.9131600E-02
  -.9151867E-02  -.8966476E-02  -.8673414E-02  -.8222877E-02  -.7711356E-02
  -.7365010E-02  -.7325312E-02  -.7431342E-02  -.7499592E-02  -.7239042E-02
  -.6678242E-02  -.6133959E-02  -.5794300E-02  -.5742426E-02  -.5901755E-02
  -.6093509E-02  -.6159830E-02  -.6002464E-02  -.5660469E-02  -.5040041E-02
  -.4155954E-02  -.3309197E-02  -.2811991E-02  -.2768563E-02  -.2953668E-02
  -.3195836E-02  -.3492369E-02  -.3877629E-02  -.4346051E-02  -.4742663E-02
  -.4696054E-02  -.4010875E-02  -.2874517E-02  -.1583348E-02  -.4351190E-03
   .3479984E-03   .8380060E-03   .1180734E-02   .1465001E-02   .1542527E-02
   .1314689E-02   .9081347E-03   .4075135E-03  -.1135708E-03  -.3431093E-03
  -.1652692E-03   .2956997E-03   .8462267E-03   .1325350E-02   .1737840E-02
   .2207094E-02   .2812812E-02   .3440754E-02   .3903632E-02   .4131265E-02
   .4140530E-02   .4046389E-02   .4025085E-02   .4040999E-02   .4006770E-02
   .3860912E-02   .3575787E-02   .3265864E-02   .2939728E-02   .2549035E-02
   .2204575E-02   .2086434E-02   .2238349E-02   .2538597E-02   .2769466E-02
   .2753050E-02   .2531612E-02   .2195683E-02   .1941797E-02   .1919628E-02
   .2020048E-02   .2026328E-02   .1815562E-02   .1361976E-02   .7240417E-03
   .7533725E-05  -.6946795E-03  -.9046667E-03  -.5900593E-03  -.6515575E-04
   .5653893E-03   .1185650E-02   .1700817E-02   .2010955E-02   .2164036E-02
   .2206042E-02   .2249304E-02   .2468336E-02   .2755690E-02   .2925186E-02
   .2863340E-02   .2876478E-02   .3200327E-02   .3652549E-02   .3946461E-02
   .3967441E-02   .3731967E-02   .3429374E-02   .3251668E-02   .3317539E-02
   .3787493E-02   .4530060E-02   .5106902E-02   .5193604E-02   .4987446E-02
   .4867016E-02   .4893666E-02   .4967031E-02   .5071051E-02   .5077323E-02
   .4739577E-02   .4263538E-02   .4050887E-02   .4149490E-02   .4336559E-02
   .4411762E-02   .4478431E-02   .4538563E-02   .4426205E-02   .4253906E-02
   .4145114E-02   .3938571E-02   .3629694E-02   .3349507E-02   .3122640E-02
   .3152903E-02   .3536274E-02   .4013572E-02   .4320396E-02   .4333056E-02
   .4099051E-02   .3771075E-02   .3542574E-02   .3486251E-02   .3475919E-02
   .3352574E-02   .3247059E-02   .3235072E-02   .3314750E-02   .3399370E-02
   .3331928E-02   .3023861E-02   .2556867E-02   .2157169E-02   .2041367E-02
   .2169770E-02   .2458057E-02   .2799551E-02   .3057487E-02   .2965684E-02
   .2655510E-02   .2447258E-02   .2438833E-02   .2541352E-02   .2469384E-02
   .2118302E-02   .1664384E-02   .1318492E-02   .1105500E-02   .1221310E-02
   .1662440E-02   .2193896E-02   .2722491E-02   .3111694E-02   .3238609E-02
   .3142944E-02   .3014636E-02   .3010571E-02   .3178661E-02   .3390085E-02
   .3563009E-02   .3751700E-02   .3841720E-02   .3761839E-02   .3601691E-02
   .3591295E-02   .3723038E-02   .3919934E-02   .4206024E-02   .4506788E-02
   .4790185E-02   .4899099E-02   .4715131E-02   .4460090E-02   .4253969E-02
   .4071780E-02   .3886760E-02   .3757353E-02   .3889143E-02   .4085621E-02
   .4071314E-02   .4036656E-02   .4110541E-02   .4110439E-02   .4129040E-02
   .4221987E-02   .4131276E-02   .3764554E-02   .3328824E-02   .2949392E-02
   .2772965E-02   .2674113E-02   .2460634E-02   .2278571E-02   .2284934E-02
   .2391876E-02   .2530956E-02   .2783016E-02   .3103350E-02   .3280075E-02
   .3157692E-02   .2888701E-02   .2515389E-02   .1956185E-02   .1334395E-02
   .6559692E-03   .6526875E-04  -.2862672E-03  -.3816422E-03  -.3620290E-03
  -.4700697E-03  -.7183724E-03  -.1024526E-02  -.1338851E-02  -.1625863E-02
  -.1962227E-02  -.2330731E-02  -.2795329E-02  -.3394095E-02  -.3954104E-02
  -.4316484E-02  -.4498910E-02  -.4503852E-02  -.4195467E-02  -.3802587E-02
  -.3698768E-02  -.3824608E-02  -.3885656E-02  -.3917943E-02  -.3754686E-02
  -.3256710E-02  -.2676318E-02  -.2277432E-02  -.1965841E-02  -.1602636E-02
  -.1219007E-02  -.8166268E-03  -.4044056E-03  -.9239497E-05   .6907557E-04
  -.1227643E-03  -.3141279E-03  -.3565035E-03  -.2939184E-03  -.1227911E-03
   .2508406E-04  -.9889741E-04  -.5173823E-03  -.1158329E-02  -.1851059E-02
  -.2234767E-02  -.2177091E-02  -.1840517E-02  -.1532788E-02  -.1251597E-02
  -.8903804E-03  -.5378065E-03  -.3186120E-03  -.3571425E-03  -.6402570E-03
  -.1127541E-02  -.1691415E-02  -.2197047E-02  -.2541262E-02  -.2603654E-02
  -.2241464E-02  -.1690216E-02  -.1346409E-02  -.1266072E-02  -.1355471E-02
  -.1503468E-02  -.1718063E-02  -.1975531E-02  -.2156595E-02  -.2149850E-02
  -.1997390E-02  -.1800234E-02  -.1581423E-02  -.1178488E-02  -.4452311E-03
   .4806763E-03   .1278481E-02   .1641882E-02   .1502857E-02   .8544090E-03
  -.9202110E-04  -.9778697E-03  -.1568663E-02  -.1965504E-02  -.2275484E-02
  -.2470142E-02  -.2521532E-02  -.2530317E-02  -.2485547E-02  -.2395219E-02
  -.2323201E-02  -.2362645E-02  -.2607416E-02  -.3155342E-02  -.3848897E-02
  -.4498092E-02  -.5211215E-02  -.6016570E-02  -.6611059E-02  -.6969845E-02
  -.7006045E-02  -.6523819E-02  -.5763015E-02  -.5133043E-02  -.4889887E-02
  -.4913480E-02  -.4954811E-02  -.5058261E-02  -.5120975E-02  -.5028616E-02
  -.4919934E-02  -.4897090E-02  -.4882574E-02  -.4735629E-02  -.4483591E-02
  -.4241489E-02  -.3995945E-02  -.3789934E-02  -.3602155E-02  -.3379197E-02
  -.3091135E-02  -.2754970E-02  -.2404130E-02  -.2125300E-02  -.1904755E-02
  -.1549522E-02  -.1139003E-02  -.9374836E-03  -.1091541E-02  -.1507715E-02
  -.2103258E-02  -.2823708E-02  -.3414498E-02  -.3778645E-02  -.3884928E-02
  -.3649552E-02  -.3431917E-02  -.3555129E-02  -.3874798E-02  -.4289632E-02
  -.4815219E-02  -.5360522E-02  -.5863375E-02  -.6308606E-02  -.6635669E-02
  -.6863881E-02  -.7055064E-02  -.7126421E-02  -.7023075E-02  -.6854762E-02
  -.6820982E-02  -.6873780E-02  -.6741339E-02  -.6326219E-02  -.5734895E-02
  -.5131503E-02  -.4778339E-02  -.4624926E-02  -.4514374E-02  -.4357972E-02
  -.4251393E-02  -.4283414E-02  -.4384065E-02  -.4387514E-02  -.4188776E-02
  -.3886111E-02  -.3579675E-02  -.3235979E-02  -.2897434E-02  -.2632050E-02
  -.2563815E-02  -.2714158E-02  -.2897506E-02  -.3064218E-02  -.3285282E-02
  -.3545252E-02  -.3726519E-02  -.3806530E-02  -.3831154E-02  -.3798332E-02
  -.3745405E-02  -.3661947E-02  -.3557099E-02  -.3524868E-02  -.3495478E-02
  -.3547711E-02  -.3789484E-02  -.4283057E-02  -.4960746E-02  -.5644675E-02
  -.6101791E-02  -.6191657E-02  -.5979385E-02  -.5662977E-02  -.5429581E-02
  -.5274669E-02  -.5077631E-02  -.4727720E-02  -.4481881E-02  -.4563909E-02
  -.4685791E-02  -.4693321E-02  -.4649223E-02  -.4511293E-02  -.4175138E-02
  -.3800119E-02  -.3577527E-02  -.3377840E-02  -.3152612E-02  -.2937605E-02
  -.2630514E-02  -.2156558E-02  -.1803026E-02  -.1810967E-02  -.2168069E-02
  -.2800681E-02  -.3444220E-02  -.3911395E-02  -.4248117E-02  -.4314295E-02
  -.3970086E-02  -.3493279E-02  -.3142744E-02  -.2876602E-02  -.2616573E-02
  -.2443771E-02  -.2519680E-02  -.2725799E-02  -.2899690E-02  -.2944903E-02
  -.2814433E-02  -.2656827E-02  -.2332007E-02  -.1794657E-02  -.2122134E-02
  -.4815621E-02  -.8839208E-02  -.1003063E-01  -.5061795E-02   .3372008E-02
   .7432823E-02   .2212439E-02  -.7716157E-02  -.1228520E-01  -.6993177E-02
   .1974398E-02   .5046239E-02  -.5386405E-04  -.7130164E-02  -.9657418E-02
  -.6906657E-02  -.2939502E-02  -.1616608E-02  -.3269888E-02  -.5765390E-02
  -.6954287E-02  -.5795945E-02  -.2562144E-02   .9077688E-03   .2002776E-02
  -.6608551E-03  -.5393175E-02  -.8296168E-02  -.6931420E-02  -.2766353E-02
   .6122473E-03   .9048696E-03  -.1642677E-02  -.5071890E-02  -.7209206E-02
  -.6830513E-02  -.3946137E-02  -.1369081E-03   .1906808E-02   .5171324E-03
  -.3051636E-02  -.5170316E-02  -.3377938E-02   .5432025E-03   .2083870E-02
  -.1431559E-02  -.7660065E-02  -.1105332E-01  -.8545604E-02  -.2412135E-02
   .1874178E-02   .1162689E-02  -.2957513E-02  -.6052557E-02  -.5004709E-02
  -.7952239E-03   .2385404E-02   .1190829E-02  -.3467169E-02  -.7159157E-02
  -.5995816E-02  -.9832422E-03   .2788209E-02   .1848312E-02  -.1772231E-02
  -.3649174E-02  -.1639377E-02   .2491745E-02   .5570699E-02   .6220127E-02
   .4997647E-02   .3083640E-02   .1311310E-02   .4594441E-03   .1163826E-02
   .3061426E-02   .4533029E-02   .4149562E-02   .2365064E-02   .1161965E-02
   .1947191E-02   .3876944E-02   .4645438E-02   .3339594E-02   .1329961E-02
   .6706296E-03   .1589632E-02   .2696740E-02   .3066168E-02   .3181948E-02
   .3944956E-02   .4919014E-02   .4782288E-02   .3528426E-02   .2841265E-02
   .3849017E-02   .5430605E-02   .5689368E-02   .4440252E-02   .3407304E-02
   .3805212E-02   .4941169E-02   .5738126E-02   .5991944E-02   .5788009E-02
   .5068524E-02   .4002844E-02   .3319240E-02   .3492964E-02   .4121575E-02
   .4479671E-02   .4388979E-02   .4410729E-02   .4811709E-02   .5099162E-02
   .4639960E-02   .3649359E-02   .3496485E-02   .4816899E-02   .6490707E-02
   .6807815E-02   .5263735E-02   .3205470E-02   .2331485E-02   .3430300E-02
   .5808435E-02   .7580156E-02   .7019752E-02   .4317602E-02   .1712231E-02
   .1190023E-02   .2356895E-02   .3161588E-02   .2314957E-02   .5449727E-03
  -.3381478E-03   .4276725E-03   .1972942E-02   .2959179E-02   .3018118E-02
   .2452672E-02   .1511732E-02   .6565972E-03   .3600404E-03   .7651593E-03
   .1880039E-02   .3467085E-02   .4555426E-02   .3886019E-02   .1506050E-02
  -.5640650E-03  -.1684318E-03   .2334455E-02   .4397423E-02   .3984504E-02
   .1674101E-02  -.3544784E-03  -.6165054E-03   .5890409E-03   .1884049E-02
   .2329253E-02   .2114114E-02   .2133769E-02   .2774758E-02   .3625478E-02
   .4147574E-02   .4090356E-02   .3728648E-02   .3444577E-02   .3401803E-02
   .3755288E-02   .4698988E-02   .6025493E-02   .7186297E-02   .7788736E-02
   .7850818E-02   .7768205E-02   .8188284E-02   .9266314E-02   .1046591E-01
   .1135110E-01   .1156837E-01   .1083426E-01   .9312482E-02   .7848131E-02
   .7139856E-02   .6936357E-02   .6570747E-02   .6245444E-02   .6847136E-02
   .8477531E-02   .9893394E-02   .9884770E-02   .8857168E-02   .8342646E-02
   .9212572E-02   .1060689E-01   .1097251E-01   .9652463E-02   .6939676E-02
   .4060255E-02   .2485489E-02   .2507813E-02   .3627295E-02   .5383092E-02
   .7337160E-02   .9026815E-02   .1007883E-01   .1011948E-01   .9139636E-02
   .7776020E-02   .6825427E-02   .6708594E-02   .7387821E-02   .8121053E-02
   .7762195E-02   .6091994E-02   .4366679E-02   .4183947E-02   .5627299E-02
   .7072815E-02   .7191190E-02   .6290132E-02   .5963394E-02   .7104343E-02
   .8869781E-02   .9635973E-02   .8651314E-02   .6732794E-02   .5246865E-02
   .4780320E-02   .4995480E-02   .5196992E-02   .4793883E-02   .3656014E-02
   .2457042E-02   .2238381E-02   .3413406E-02   .5348212E-02   .6875788E-02
   .7228768E-02   .6567936E-02   .5529069E-02   .4579062E-02   .3923194E-02
   .3258429E-02   .2247579E-02   .1283180E-02   .1131794E-02   .1899551E-02
   .2821135E-02   .3202646E-02   .2963617E-02   .2364043E-02   .2140075E-02
   .2880178E-02   .4164067E-02   .4870134E-02   .4514889E-02   .3907076E-02
   .3780737E-02   .3918032E-02   .3662572E-02   .2853009E-02   .2002484E-02
   .1694908E-02   .1988509E-02   .2222785E-02   .2080853E-02   .2088596E-02
   .2648527E-02   .3448359E-02   .3965225E-02   .4014868E-02   .3745719E-02
   .3373750E-02   .3194964E-02   .3318671E-02   .3607341E-02   .3730788E-02
   .3315739E-02   .2439624E-02   .1756338E-02   .1651920E-02   .1955497E-02
   .2293608E-02   .2381022E-02   .2230015E-02   .2038299E-02   .1950752E-02
   .1860648E-02   .1532887E-02   .8569575E-03   .7013006E-04  -.4597778E-03
  -.5939727E-03  -.4560974E-03  -.5109919E-03  -.1079441E-02  -.1983226E-02
  -.2674700E-02  -.2652011E-02  -.1989834E-02  -.1431467E-02  -.1603002E-02
  -.2317901E-02  -.3007147E-02  -.3322883E-02  -.3221369E-02  -.2895107E-02
  -.2553666E-02  -.2168929E-02  -.1823382E-02  -.1574158E-02  -.1396459E-02
  -.1336626E-02  -.1483003E-02  -.1785954E-02  -.2080801E-02  -.2311713E-02
  -.2527012E-02  -.2585651E-02  -.2588229E-02  -.2816282E-02  -.3394961E-02
  -.4102928E-02  -.4430207E-02  -.4253517E-02  -.3901331E-02  -.3597130E-02
  -.3289880E-02  -.2811857E-02  -.2140742E-02  -.1455209E-02  -.1024961E-02
  -.1079427E-02  -.1315119E-02  -.1260886E-02  -.1026673E-02  -.9317183E-03
  -.1127466E-02  -.1501980E-02  -.1803152E-02  -.1761511E-02  -.1377431E-02
  -.7915791E-03  -.1883696E-03   .1926976E-03   .4213391E-03   .7030471E-03
   .1021931E-02   .1138138E-02   .9876551E-03   .6551331E-03   .2269876E-03
  -.2592300E-03  -.6448979E-03  -.8479552E-03  -.8376817E-03  -.5176363E-03
   .2247692E-03   .1158948E-02   .1792210E-02   .2002362E-02   .2086550E-02
   .2122559E-02   .2100942E-02   .1804230E-02   .1010340E-02  -.6965260E-04
  -.9228227E-03  -.1251104E-02  -.1042291E-02  -.4261396E-03   .2450265E-03
   .7749366E-03   .1023324E-02   .1019712E-02   .9296260E-03   .7674893E-03
   .4672029E-03   .9967523E-05  -.5430838E-03  -.1045786E-02  -.1193746E-02
  -.9092665E-03  -.3493007E-03   .1905115E-03   .4614599E-03   .5405376E-03
   .6372078E-03   .7960005E-03   .9926698E-03   .1196983E-02   .1293272E-02
   .1118861E-02   .7835078E-03   .5628812E-03   .4717098E-03   .5104156E-03
   .6893370E-03   .9174470E-03   .1150449E-02   .1379107E-02   .1608454E-02
   .1913743E-02   .2346494E-02   .2817573E-02   .3185359E-02   .3418108E-02
   .3628378E-02   .3714467E-02   .3525841E-02   .3164261E-02   .2879035E-02
   .2841287E-02   .3046198E-02   .3253562E-02   .3160763E-02   .2850725E-02
   .2654862E-02   .2668791E-02   .2764572E-02   .2829232E-02   .2823365E-02
   .2728449E-02   .2636374E-02   .2631814E-02   .2705222E-02   .2862125E-02
   .3180169E-02   .3540604E-02   .3791261E-02   .3939944E-02   .4019659E-02
   .4036270E-02   .4097935E-02   .4060257E-02   .3826418E-02   .3491711E-02
   .3207731E-02   .3002070E-02   .2768589E-02   .2467238E-02   .2176252E-02
   .1916718E-02   .1612593E-02   .1457026E-02   .1568565E-02   .1870765E-02
   .2321003E-02   .2786085E-02   .3036774E-02   .3064946E-02   .3018204E-02
   .2949392E-02   .3005662E-02   .3297140E-02   .3716453E-02   .4145810E-02
   .4473626E-02   .4559815E-02   .4505799E-02   .4523418E-02   .4567961E-02
   .4500235E-02   .4328576E-02   .4190479E-02   .4184791E-02   .4384290E-02
   .4768910E-02   .5148960E-02   .5362464E-02   .5224063E-02   .4790026E-02
   .4353303E-02   .3912342E-02   .3500938E-02   .3186200E-02   .2894833E-02
   .2619115E-02   .2460846E-02   .2430736E-02   .2486997E-02   .2566834E-02
   .2585040E-02   .2552388E-02   .2459753E-02   .2196825E-02   .1873860E-02
   .1539452E-02   .1059993E-02   .4770592E-03  -.1443611E-04  -.2318996E-03
  -.1627450E-03   .1005866E-03   .4833652E-03   .7722281E-03   .8170698E-03
   .5496301E-03   .1940834E-04  -.5293454E-03  -.9397200E-03  -.1213071E-02
  -.1322645E-02  -.1408877E-02  -.1536761E-02  -.1526427E-02  -.1280805E-02
  -.8994602E-03  -.5505088E-03  -.4296508E-03  -.6959321E-03  -.1158831E-02
  -.1327345E-02  -.1048514E-02  -.5865595E-03  -.2145075E-03   .4463984E-04
   .1325664E-03   .1067079E-03   .1879726E-03   .4249254E-03   .6020946E-03
   .6808046E-03   .8246155E-03   .1006972E-02   .1132871E-02   .1285265E-02
   .1465857E-02   .1641849E-02   .1708899E-02   .1618718E-02   .1446771E-02
   .1184860E-02   .9240331E-03   .5519898E-03   .6481402E-04  -.3856384E-03
  -.8165631E-03  -.1110428E-02  -.1183098E-02  -.1148272E-02  -.1147272E-02
  -.1202303E-02  -.1166349E-02  -.9851561E-03  -.8745713E-03  -.9807029E-03
  -.1274999E-02  -.1604937E-02  -.1799824E-02  -.1826187E-02  -.1724264E-02
  -.1585595E-02  -.1365903E-02  -.1059010E-02  -.7345545E-03  -.4528544E-03
  -.2452168E-03  -.1363600E-03  -.1051651E-03  -.1674666E-03  -.3854104E-03
  -.7392772E-03  -.1034385E-02  -.1165566E-02  -.1153985E-02  -.1104038E-02
  -.1030050E-02  -.8910166E-03  -.6606711E-03  -.3423598E-03   .3886910E-04
   .2727843E-03   .2957491E-03   .1980598E-03   .3183728E-04  -.1812226E-03
  -.4017176E-03  -.6004475E-03  -.6162564E-03  -.3562226E-03   .4626210E-04
   .4460554E-03   .8738679E-03   .1246828E-02   .1314239E-02   .1042628E-02
   .6301291E-03   .2685961E-03  -.5567636E-04  -.3921259E-03  -.6433170E-03
  -.7606533E-03  -.7867502E-03  -.7508146E-03  -.6809603E-03  -.7641526E-03
  -.1054083E-02  -.1403274E-02  -.1601040E-02  -.1626416E-02  -.1616254E-02
  -.1659843E-02  -.1662105E-02  -.1591284E-02  -.1587963E-02  -.1575647E-02
  -.1564415E-02  -.1612300E-02  -.1669689E-02  -.1824262E-02  -.1952787E-02
  -.2005953E-02  -.2062106E-02  -.2152192E-02  -.2137596E-02  -.1898522E-02
  -.1561771E-02  -.1249443E-02  -.9943714E-03  -.9369204E-03  -.1205155E-02
  -.1650117E-02  -.2134586E-02  -.2519993E-02  -.2765220E-02  -.2883004E-02
  -.2845558E-02  -.2737695E-02  -.2770691E-02  -.2984697E-02  -.3120587E-02
  -.3122541E-02  -.3111286E-02  -.3164406E-02  -.3184286E-02  -.3043097E-02
  -.2834012E-02  -.2500109E-02  -.2016219E-02  -.1577550E-02  -.1284968E-02
  -.1124411E-02  -.1026562E-02  -.9226969E-03  -.8035794E-03  -.7056226E-03
  -.6745600E-03  -.6569311E-03  -.5588348E-03  -.3411936E-03  -.1566089E-03
  -.7951285E-05   .1376004E-03   .1937492E-03   .1130131E-03   .4208199E-04
   .1293065E-03   .2930374E-03   .3703224E-03   .4485787E-03   .5479835E-03
   .6025205E-03   .7004985E-03   .8477576E-03   .9960436E-03   .1023315E-02
   .9455815E-03   .8312177E-03   .6832152E-03   .5353386E-03   .4177808E-03
   .3670012E-03   .3583536E-03   .3515548E-03   .4118848E-03   .5780818E-03
   .7855962E-03   .9201165E-03   .8827278E-03   .6878989E-03   .4702214E-03
   .3468669E-03   .4258537E-03   .5835132E-03   .5476100E-03   .2176304E-03
  -.2589793E-03  -.6979673E-03  -.1021563E-02  -.1165143E-02  -.1165575E-02
  -.1194618E-02  -.1286267E-02  -.1368410E-02  -.1403342E-02  -.1426321E-02
  -.1413139E-02  -.1445840E-02  -.1603077E-02  -.1727499E-02  -.1773330E-02
  -.1678514E-02  -.1450639E-02  -.1256984E-02  -.1247938E-02  -.1451206E-02
  -.1777865E-02  -.1959068E-02  -.1887826E-02  -.1733996E-02  -.1566266E-02
  -.1308249E-02  -.1157748E-02  -.1254020E-02  -.1379996E-02  -.1371575E-02
  -.1296271E-02  -.1316986E-02  -.1446389E-02  -.1577436E-02  -.1677090E-02
  -.1742159E-02  -.1695114E-02  -.1492285E-02  -.1129068E-02  -.6427288E-03
  -.2267985E-03  -.3371993E-04  -.9822181E-04  -.2990016E-03  -.5489184E-03
  -.7655670E-03  -.9209787E-03  -.9597804E-03  -.8608157E-03  -.7654203E-03
  -.7081710E-03  -.6655740E-03  -.7375624E-03  -.8990421E-03  -.1052960E-02
  -.1179338E-02  -.1342230E-02  -.1458550E-02  -.1389832E-02  -.1236819E-02
  -.1110931E-02  -.9743831E-03  -.8911661E-03  -.9421002E-03  -.1134698E-02
  -.1406790E-02  -.1657707E-02  -.1875740E-02  -.2036326E-02  -.2040561E-02
  -.1994864E-02  -.2020986E-02  -.2081691E-02  -.2208887E-02  -.2347524E-02
  -.2374325E-02  -.2301710E-02  -.2198842E-02  -.2181669E-02  -.2231815E-02
  -.2227183E-02  -.2130474E-02  -.2007883E-02  -.1902339E-02  -.1772025E-02
  -.1692591E-02  -.1673411E-02  -.1625155E-02  -.1525983E-02  -.1413518E-02
  -.1374926E-02  -.1489757E-02  -.1658059E-02  -.1776994E-02  -.1887628E-02
  -.1965217E-02  -.1949096E-02  -.1886137E-02  -.1864924E-02  -.1938292E-02
  -.2082962E-02  -.2184218E-02  -.2194903E-02  -.2158350E-02  -.2132985E-02
  -.2187158E-02  -.2329301E-02  -.2371415E-02  -.2237469E-02  -.1944633E-02
  -.1571961E-02  -.1274243E-02  -.1197754E-02  -.1252253E-02  -.1285319E-02
  -.1280400E-02  -.1283545E-02  -.1365614E-02  -.1531116E-02  -.1753869E-02
  -.1901607E-02  -.1927198E-02  -.1951356E-02  -.2017274E-02  -.2081617E-02
  -.2131180E-02  -.2186583E-02  -.2246541E-02  -.2318892E-02  -.2332727E-02
  -.2341557E-02  -.2410612E-02  -.2448954E-02  -.2313737E-02  -.2124329E-02
  -.2020720E-02  -.1978160E-02  -.1923097E-02  -.1772780E-02  -.1577680E-02
  -.1438196E-02  -.1372421E-02  -.1355918E-02  -.1381695E-02  -.1498003E-02
  -.1668098E-02  -.1824485E-02  -.1948863E-02  -.2078581E-02  -.2220370E-02
  -.2231139E-02  -.2136112E-02  -.2055413E-02  -.2056279E-02  -.2174622E-02
  -.2345269E-02  -.2514896E-02  -.2631440E-02  -.2595210E-02  -.2481041E-02
  -.2438993E-02  -.2440599E-02  -.2342950E-02  -.2126736E-02  -.1883284E-02
  -.1659887E-02  -.1360065E-02  -.1116826E-02  -.9667557E-03  -.8560275E-03
  -.8219900E-03  -.8727869E-03  -.9495380E-03  -.1011376E-02  -.1027778E-02
  -.1000786E-02  -.8738403E-03  -.6090841E-03  -.2927896E-03  -.1017245E-03
  -.1562765E-03  -.3206570E-03  -.4406845E-03  -.4839605E-03  -.3976519E-03
  -.2752968E-03  -.1940780E-03  -.1400018E-03  -.8470749E-05   .2385869E-03
   .5321472E-03   .7487566E-03   .8176134E-03   .7954062E-03   .7352830E-03
   .6402236E-03   .4881712E-03   .2822521E-03   .4423093E-04  -.1606129E-03
  -.3240659E-03  -.4167958E-03  -.4515352E-03  -.5521409E-03  -.6907538E-03
  -.8195209E-03  -.9313391E-03  -.1043412E-02  -.1209837E-02  -.1447754E-02
  -.1709325E-02  -.1857543E-02  -.1846823E-02  -.1787172E-02  -.1799963E-02
  -.1900255E-02  -.1968118E-02  -.1979658E-02  -.1880832E-02  -.1729295E-02
  -.1630444E-02  -.1638124E-02  -.1756790E-02  -.1970277E-02  -.2231155E-02
  -.2470409E-02  -.2693743E-02  -.2909288E-02  -.3103375E-02  -.3214266E-02
  -.3267967E-02  -.3333116E-02  -.3387606E-02  -.3394315E-02  -.3336202E-02
  -.3321321E-02  -.3395679E-02  -.3428312E-02  -.3392944E-02  -.3342947E-02
  -.3313597E-02  -.3244107E-02  -.3168356E-02  -.3188638E-02  -.3213458E-02
  -.3134307E-02  -.3037482E-02  -.2966311E-02  -.2895247E-02  -.2798349E-02
  -.2701363E-02  -.2613505E-02  -.2493094E-02  -.2431581E-02  -.2495412E-02
  -.2566004E-02  -.2561854E-02  -.2508272E-02  -.2383467E-02  -.2230553E-02
  -.2086544E-02  -.1905646E-02  -.1730577E-02  -.1614900E-02  -.1570578E-02
  -.1548104E-02  -.1513452E-02  -.1474086E-02  -.1442876E-02  -.1453134E-02
  -.1468395E-02  -.1463578E-02  -.1476697E-02  -.1572793E-02  -.1689036E-02
  -.1745790E-02  -.1773450E-02  -.1726040E-02  -.1627440E-02  -.1679922E-02
  -.1832036E-02  -.1851078E-02  -.1746810E-02  -.1645801E-02  -.1489616E-02
  -.1245499E-02  -.1051508E-02  -.1002326E-02  -.9875655E-03  -.9453839E-03
  -.9510160E-03  -.1017867E-02  -.1059305E-02  -.1056932E-02  -.1023806E-02
  -.9263496E-03  -.8022498E-03  -.7200796E-03  -.6960452E-03  -.7379752E-03
  -.8480982E-03  -.9729326E-03  -.1053834E-02  -.1091258E-02  -.1151208E-02
  -.1227149E-02  -.1253476E-02  -.1207510E-02  -.1115519E-02  -.1066115E-02
  -.1078930E-02  -.1181869E-02  -.1342811E-02  -.1486166E-02  -.1553686E-02
  -.1567352E-02  -.1590965E-02  -.1611361E-02  -.1600208E-02  -.1506573E-02
  -.1306115E-02  -.1112969E-02  -.1028379E-02  -.1076375E-02  -.1223529E-02
  -.1394757E-02  -.1518804E-02  -.1583720E-02  -.1598590E-02  -.1603873E-02
  -.1628570E-02  -.1691144E-02  -.1744476E-02  -.1708531E-02  -.1608742E-02
  -.1488697E-02  -.1411003E-02  -.1441618E-02  -.1484382E-02  -.1378684E-02
  -.1172690E-02  -.9908882E-03  -.8641664E-03  -.7436296E-03  -.6454872E-03
  -.6420602E-03  -.6808482E-03  -.7632296E-03  -.8919695E-03  -.1011643E-02
  -.1115058E-02  -.1176595E-02  -.1177456E-02  -.1118249E-02  -.1099360E-02
  -.1172447E-02  -.1257229E-02  -.1331676E-02  -.1402402E-02  -.1494149E-02
  -.1588586E-02  -.1650936E-02  -.1648013E-02  -.1522391E-02  -.1337037E-02
  -.1233618E-02  -.1188883E-02  -.1090683E-02  -.9865752E-03  -.9573192E-03
  -.1018843E-02  -.1068836E-02  -.1036454E-02  -.9401332E-03  -.8540427E-03
  -.8173065E-03  -.7733567E-03  -.6529924E-03  -.4619030E-03  -.2819694E-03
  -.1690775E-03  -.1141246E-03  -.8292434E-04  -.4410642E-04   .3015620E-04
   .8517600E-04   .5203824E-04   .6251768E-05   .6114683E-05   .9424867E-05
  -.2106632E-04  -.1434325E-04   .5663251E-04   .1246226E-03   .1176014E-03
   .9321254E-04   .1262120E-03   .1537987E-03   .1047073E-03  -.7769023E-05
  -.1300570E-03  -.2340004E-03  -.3288311E-03  -.3792570E-03  -.3984214E-03
  -.4038438E-03  -.3697092E-03  -.2877714E-03  -.2003455E-03  -.1651110E-03
  -.1624712E-03  -.1427106E-03  -.9528460E-04  -.6882788E-04  -.8567545E-04
  -.7020706E-04   .7671963E-04   .2472516E-03   .3329146E-03   .3497677E-03
   .3406211E-03   .3520243E-03   .4198004E-03   .5075719E-03   .5936001E-03
   .6461346E-03   .6096249E-03   .5260114E-03   .4743492E-03   .5290227E-03
   .6524826E-03   .7297876E-03   .7485672E-03   .7643818E-03   .7961788E-03
   .8288420E-03   .8920107E-03   .9933598E-03   .1106305E-02   .1214363E-02
   .1276844E-02   .1283308E-02   .1298166E-02   .1357610E-02   .1402783E-02
   .1408312E-02   .1362203E-02   .1237354E-02   .1065701E-02   .9369858E-03
   .9262414E-03   .9704655E-03   .9854024E-03   .9500902E-03   .8967123E-03
   .8742679E-03   .9044431E-03   .9833994E-03   .1071189E-02   .1154361E-02
   .1239663E-02   .1327260E-02   .1363217E-02   .1343529E-02   .1330967E-02
   .1331068E-02   .1311743E-02   .1233504E-02   .1100066E-02   .9851403E-03
   .9494916E-03   .9782736E-03   .1001054E-02   .9670512E-03   .8918916E-03
   .8004070E-03   .7287937E-03   .7175065E-03   .7416030E-03   .7421603E-03
   .6976476E-03   .6186596E-03   .5664031E-03   .5697638E-03   .5845905E-03
   .6231066E-03   .6626665E-03   .6622287E-03   .6525320E-03   .6403240E-03
   .6168985E-03   .5989758E-03   .6034643E-03   .6417298E-03   .6484207E-03
   .6064638E-03   .6049261E-03   .6076618E-03   .5505462E-03   .4393501E-03
   .2994750E-03   .1812458E-03   .1224845E-03   .1280211E-03   .1657927E-03
   .2496467E-03   .3710278E-03   .4766304E-03   .5386857E-03   .5805184E-03
   .6017221E-03   .5832335E-03   .5367710E-03   .4588937E-03   .3866699E-03
   .3600763E-03   .3455564E-03   .3349870E-03   .3389139E-03   .3473182E-03
   .3643980E-03   .3582131E-03   .3315538E-03   .3166463E-03   .3215201E-03
   .3326553E-03   .3530317E-03   .3951964E-03   .4394747E-03   .4283963E-03
   .3154382E-03   .2028536E-03   .1744966E-03   .1801382E-03   .1835159E-03
   .2195869E-03   .3094882E-03   .3982110E-03   .4490843E-03   .4903729E-03
   .5399285E-03   .5756544E-03   .5932066E-03   .5937776E-03   .5696607E-03
   .5198921E-03   .4464828E-03   .3889495E-03   .3705256E-03   .3525193E-03
   .3171819E-03   .3133767E-03   .3396055E-03   .3663705E-03   .3863885E-03
   .3857051E-03   .3810329E-03   .3971191E-03   .4531739E-03   .5170621E-03
   .5310005E-03   .5043307E-03   .4914173E-03   .5260858E-03   .5566330E-03
   .5466120E-03   .5177508E-03   .5016454E-03   .5063627E-03   .4953299E-03
   .4656676E-03   .4339775E-03   .3963483E-03   .3631407E-03   .3353451E-03
   .3238133E-03   .3341147E-03   .3552818E-03   .3558900E-03   .3176082E-03
   .2787168E-03   .2600204E-03   .2504677E-03   .2633517E-03   .2879863E-03
   .3258571E-03   .3814311E-03   .4293852E-03   .4530096E-03   .4606467E-03
   .4786587E-03   .4699355E-03   .4284267E-03   .4001030E-03   .3961352E-03
   .4008548E-03   .4088961E-03   .4262037E-03   .4573469E-03   .4908597E-03
   .4997408E-03   .5083251E-03   .5270572E-03   .5573645E-03   .5923265E-03
   .6035599E-03   .6007198E-03   .6274608E-03   .6750564E-03   .7139637E-03
   .7275439E-03   .7133575E-03   .7074258E-03   .7290461E-03   .7685167E-03
   .8140354E-03   .8455752E-03   .8522029E-03   .8480972E-03   .8414670E-03
   .8350235E-03   .8394184E-03   .8484910E-03   .8454733E-03   .8316364E-03
   .8183565E-03   .8109724E-03   .8117719E-03   .8127028E-03   .8079423E-03
   .8063351E-03   .8152558E-03   .8306551E-03   .8422283E-03   .8557596E-03
   .8729172E-03   .8977229E-03   .9171995E-03   .9123935E-03   .9095480E-03
   .9234816E-03   .9280773E-03   .9116518E-03   .8829642E-03   .8549461E-03
   .8459030E-03   .8517495E-03   .8609618E-03   .8876414E-03   .9195441E-03
   .9173489E-03   .8877387E-03   .8644013E-03   .8629969E-03   .8610403E-03
   .8201521E-03   .7630718E-03   .7568952E-03   .8033285E-03   .8287594E-03
   .8057953E-03   .7707155E-03   .7544782E-03   .7456959E-03   .7319659E-03
   .7173239E-03   .7084040E-03   .7018335E-03   .7215512E-03   .8443183E-03
   .1092803E-02   .1264963E-02   .9668938E-03   .9701332E-04  -.6954197E-03
  -.4743406E-03   .7820811E-03   .1802529E-02   .1403498E-02   .1136909E-03
  -.3535492E-03   .5888094E-03   .1569111E-02   .1196638E-02  -.7429173E-05
  -.4630721E-03   .2219156E-03   .9241264E-03   .8227033E-03   .5749976E-03
   .1117611E-02   .2022703E-02   .2012166E-02   .8160725E-03  -.3138080E-03
  -.1595867E-03   .9732222E-03   .1726190E-02   .1390266E-02   .5785962E-03
   .2389971E-03   .5665440E-03   .1097994E-02   .1394191E-02   .1298206E-02
   .8755608E-03   .3994829E-03   .2554389E-03   .5720954E-03   .1010204E-02
   .1132594E-02   .9095684E-03   .6630348E-03   .5995134E-03   .6154667E-03
   .5623968E-03   .5079294E-03   .6474924E-03   .9650267E-03   .1142954E-02
   .9621785E-03   .6504283E-03   .5596576E-03   .6507479E-03   .6291757E-03
   .4738893E-03   .4909264E-03   .7866555E-03   .1054084E-02   .9968570E-03
   .7153376E-03   .5423280E-03   .6402911E-03   .9042568E-03   .1139908E-02
   .1158970E-02   .8591511E-03   .4104151E-03   .2203665E-03   .4890095E-03
   .8840857E-03   .9230579E-03   .6095071E-03   .4061121E-03   .5820317E-03
   .8714207E-03   .8967225E-03   .6680222E-03   .4684335E-03   .4225909E-03
   .4333999E-03   .4400026E-03   .4984586E-03   .6138064E-03   .6773026E-03
   .6233348E-03   .5327761E-03   .5267228E-03   .5921009E-03   .5981589E-03
   .4917258E-03   .3793615E-03   .3730379E-03   .4587025E-03   .5475321E-03
   .5759363E-03   .5402423E-03   .4517538E-03   .3296820E-03   .2252788E-03
   .2125303E-03   .3143388E-03   .4397264E-03   .4619134E-03   .3591047E-03
   .2434662E-03   .2464667E-03   .3777844E-03   .5169594E-03   .5362710E-03
   .4153073E-03   .2530504E-03   .1841633E-03   .2621741E-03   .3971881E-03
   .4326626E-03   .3253419E-03   .1998205E-03   .1987394E-03   .3164056E-03
   .4204202E-03   .4168790E-03   .3418381E-03   .2716518E-03   .2255583E-03
   .1927642E-03   .1920381E-03   .2436025E-03   .3032359E-03   .2904052E-03
   .1972326E-03   .1195848E-03   .1520386E-03   .2625246E-03   .3360740E-03
   .3236974E-03   .2652609E-03   .2084644E-03   .1629995E-03   .1371032E-03
   .1602397E-03   .2313979E-03   .2742724E-03   .2194140E-03   .1123315E-03
   .8357255E-04   .1858560E-03   .3187912E-03   .3501813E-03   .2592677E-03
   .1390824E-03   .8057292E-04   .1010941E-03   .1551307E-03   .1934913E-03
   .1973180E-03   .1718186E-03   .1403331E-03   .1354191E-03   .1691316E-03
   .2185120E-03   .2469347E-03   .2326788E-03   .1828166E-03   .1187809E-03
   .7090942E-04   .6156878E-04   .8993891E-04   .1397481E-03   .1887204E-03
   .2167766E-03   .2152654E-03   .1810904E-03   .1172247E-03   .4158943E-04
  -.1025082E-04  -.1310961E-04   .2221218E-04   .6078214E-04   .7610274E-04
   .7746357E-04   .9134554E-04   .1202708E-03   .1352853E-03   .1174509E-03
   .8635650E-04   .7683951E-04   .9728919E-04   .1229706E-03   .1281645E-03
   .1045616E-03   .5770703E-04   .4431185E-05  -.3205166E-04  -.3954666E-04
  -.2856172E-04  -.1453152E-04   .6221183E-05   .4035401E-04   .8168286E-04
   .1181572E-03   .1475468E-03   .1700664E-03   .1691818E-03   .1331401E-03
   .7689018E-04   .2123016E-04  -.2981926E-04  -.7618761E-04  -.1042614E-03
  -.1065275E-03  -.9478302E-04  -.8444847E-04  -.7128568E-04  -.4419205E-04
  -.1900638E-05   .4989049E-04   .9713370E-04   .1211550E-03   .1100579E-03
   .6783379E-04   .9557752E-05  -.4963508E-04  -.9967077E-04  -.1320989E-03
  -.1425067E-03  -.1318177E-03  -.1049089E-03  -.6739462E-04  -.2460447E-04
   .1769868E-04   .5159459E-04   .7034792E-04   .7265829E-04   .5806704E-04
   .2736445E-04  -.1366164E-04  -.5248210E-04  -.7768365E-04  -.9131009E-04
  -.1040025E-03  -.1180703E-03  -.1219033E-03  -.1047547E-03  -.7136022E-04
  -.3785819E-04  -.1519912E-04  -.5934909E-05  -.1327003E-04  -.3950369E-04
  -.7646584E-04  -.1064749E-03  -.1175609E-03  -.1149926E-03  -.1141861E-03
  -.1222581E-03  -.1308033E-03  -.1286958E-03  -.1138711E-03  -.9341364E-04
  -.7489712E-04  -.6098305E-04  -.5407840E-04  -.5830675E-04  -.7414285E-04
  -.9249746E-04  -.1013360E-03  -.9549398E-04  -.8275954E-04  -.7646764E-04
  -.8176600E-04  -.9191271E-04  -.9690966E-04  -.9445967E-04  -.8943737E-04
  -.8699179E-04  -.8764118E-04  -.8914041E-04  -.9029273E-04  -.9226430E-04
  -.9536162E-04  -.9721466E-04  -.9611223E-04  -.9394156E-04  -.9440763E-04
  -.9764037E-04  -.9978674E-04  -.9788948E-04  -.9297502E-04  -.8967946E-04
  -.9139875E-04  -.9676171E-04  -.1023663E-03  -.1053229E-03  -.1046560E-03
  -.1026937E-03  -.1024014E-03  -.1037651E-03  -.1042905E-03  -.1017837E-03
  -.9688397E-04  -.9251704E-04  -.9129739E-04  -.9281898E-04  -.9529985E-04
  -.9884131E-04  -.1040859E-03  -.1100344E-03  -.1142440E-03  -.1149374E-03
  -.1128539E-03  -.1102897E-03  -.1086697E-03  -.1076766E-03  -.1060690E-03
  -.1036505E-03  -.1016406E-03  -.1004003E-03  -.1002364E-03  -.1014874E-03
  -.1041890E-03  -.1072052E-03  -.1087522E-03  -.1086371E-03  -.1076384E-03
  -.1064330E-03  -.1044958E-03  -.1011147E-03  -.9722569E-04  -.9493007E-04
  -.9514714E-04  -.9706776E-04  -.9948695E-04  -.1015531E-03  -.1033087E-03
  -.1052221E-03  -.1069993E-03  -.1079166E-03  -.1078336E-03  -.1070672E-03
  -.1057680E-03  -.1039404E-03  -.1019693E-03  -.1004885E-03  -.1000743E-03
  -.1008816E-03  -.1024676E-03  -.1043798E-03  -.1060313E-03  -.1067681E-03
  -.1065713E-03  -.1059351E-03  -.1051285E-03  -.1041281E-03  -.1029206E-03
  -.1016065E-03  -.1004555E-03  -.9973564E-04  -.9931017E-04  -.9879657E-04
  -.9804226E-04  -.9725738E-04  -.9690562E-04  -.9692854E-04  -.9702627E-04
  -.9694461E-04  -.9652641E-04  -.9582090E-04  -.9499352E-04  -.9415824E-04
  -.9348892E-04  -.9308832E-04  -.9304964E-04  -.9331208E-04  -.9358825E-04
  -.9364801E-04  -.9340363E-04  -.9299394E-04  -.9261048E-04  -.9218132E-04
  -.9164839E-04  -.9106426E-04  -.9047340E-04  -.8991688E-04  -.8949152E-04
  -.8925680E-04  -.8918139E-04  -.8921966E-04  -.8926453E-04  -.8926569E-04
  -.8922157E-04  -.8909378E-04  -.8881510E-04  -.8835155E-04  -.8774386E-04
  -.8708322E-04  -.8649703E-04  -.8601529E-04  -.8556411E-04  -.8514301E-04
  -.8483357E-04  -.8466561E-04  -.8453811E-04  -.8435437E-04  -.8405863E-04
  -.8360722E-04  -.8302421E-04  -.8238679E-04  -.8179951E-04  -.8130876E-04
  -.8086508E-04  -.8042256E-04  -.8001261E-04  -.7967640E-04  -.7939706E-04
  -.7910083E-04  -.7872731E-04  -.7828656E-04  -.7779431E-04  -.7726324E-04
  -.7671189E-04  -.7616198E-04  -.7562932E-04  -.7511144E-04  -.7459914E-04
  -.7409232E-04  -.7360331E-04  -.7314026E-04  -.7268755E-04  -.7221548E-04
  -.7171600E-04  -.7119504E-04  -.7066645E-04  -.7013617E-04  -.6960094E-04
  -.6906183E-04  -.6851623E-04  -.6796583E-04  -.6742029E-04  -.6688873E-04
  -.6636539E-04  -.6583608E-04  -.6529634E-04  -.6474953E-04  -.6419766E-04
  -.6364324E-04  -.6308865E-04  -.6253207E-04  -.6196965E-04  -.6140339E-04
  -.6083888E-04  -.6027755E-04  -.5971669E-04  -.5915252E-04  -.5858392E-04
  -.5801145E-04  -.5743552E-04  -.5685801E-04  -.5628056E-04  -.5570365E-04
  -.5512677E-04  -.5454731E-04  -.5396385E-04  -.5337717E-04  -.5278923E-04
  -.5220095E-04  -.5161144E-04  -.5101994E-04  -.5042630E-04  -.4983071E-04
  -.4923359E-04  -.4863540E-04  -.4803613E-04  -.4743528E-04  -.4683281E-04
  -.4622885E-04  -.4562328E-04  -.4501606E-04  -.4440744E-04  -.4379772E-04
  -.4318692E-04  -.4257486E-04  -.4196139E-04  -.4134657E-04  -.4073047E-04
  -.4011309E-04  -.3949443E-04  -.3887452E-04  -.3825337E-04  -.3763098E-04
  -.3700738E-04  -.3638260E-04  -.3575664E-04  -.3512951E-04  -.3450124E-04
  -.3387182E-04  -.3324127E-04  -.3260961E-04  -.3197686E-04  -.3134302E-04
