# Supplementary material for: Earthquake Response Analysis of Tall Reinforced Concrete Chimneys considering Eccentricity
Source: Hindawi journal article supplement (doi:10.1155/2020/1417969), 2020-03-11
Supplement: f1 [file 1417969.f1.zip › 1417969.f1/Four kinds of earthquake records/Stiff soil/CHICHI TCU076-N.txt]

PEER STRONG MOTION DATABASE RECORD. PROCESSING BY PACIFIC ENGINEERING.
CHI-CHI 09/20/99, TCU076, N (CWB)
ACCELERATION TIME HISTORY IN UNITS OF G. FILTER POINTS: HP=0.05 Hz LP=50.0 Hz
NPTS= 18000, DT= .00500 SEC
  -.2262934E-05  -.2276965E-05  -.2258167E-05  -.2288496E-05  -.2279013E-05
  -.2306782E-05  -.2292177E-05  -.2317620E-05  -.2320711E-05  -.2385270E-05
  -.2391622E-05  -.2447800E-05  -.2479764E-05  -.2516851E-05  -.2509235E-05
  -.2549583E-05  -.2600641E-05  -.2714098E-05  -.2754913E-05  -.2774308E-05
  -.2830956E-05  -.2931377E-05  -.2942158E-05  -.2907538E-05  -.2904584E-05
  -.3089059E-05  -.3179704E-05  -.3229371E-05  -.3469960E-05  -.3697044E-05
  -.3607479E-05  -.3606391E-05  -.3750124E-05  -.3933439E-05  -.3963552E-05
  -.4037437E-05  -.4363013E-05  -.4644118E-05  -.4618120E-05  -.4858249E-05
  -.5136329E-05  -.5130124E-05  -.5175375E-05  -.5225515E-05  -.5203013E-05
  -.5441747E-05  -.5457431E-05  -.5175324E-05  -.5312778E-05  -.5836034E-05
  -.6162082E-05  -.6424800E-05  -.6369707E-05  -.6319502E-05  -.6880013E-05
  -.7218637E-05  -.7001029E-05  -.6964330E-05  -.7283165E-05  -.7885122E-05
  -.8208964E-05  -.8206494E-05  -.8681327E-05  -.8782584E-05  -.8154965E-05
  -.8794142E-05  -.9196137E-05  -.9186103E-05  -.9121238E-05  -.9707367E-05
  -.1126696E-04  -.1089209E-04  -.8951305E-05  -.9405655E-05  -.1106595E-04
  -.1153625E-04  -.1164997E-04  -.1159023E-04  -.1178055E-04  -.1213898E-04
  -.1240497E-04  -.1348913E-04  -.1311159E-04  -.1133216E-04  -.1071503E-04
  -.1217381E-04  -.1379512E-04  -.1383899E-04  -.1317228E-04  -.1345713E-04
  -.1451569E-04  -.1508971E-04  -.1649868E-04  -.1759100E-04  -.1542951E-04
  -.1501866E-04  -.1546383E-04  -.1389059E-04  -.1287067E-04  -.1431421E-04
  -.1681760E-04  -.1784379E-04  -.1802168E-04  -.1900864E-04  -.2003344E-04
  -.1935869E-04  -.1829244E-04  -.1730858E-04  -.1767916E-04  -.1963808E-04
  -.1936078E-04  -.1682443E-04  -.1706213E-04  -.1963562E-04  -.2027486E-04
  -.1942830E-04  -.2015147E-04  -.2053018E-04  -.2005031E-04  -.2015253E-04
  -.2171820E-04  -.2146821E-04  -.1958807E-04  -.1998660E-04  -.2368326E-04
  -.2641483E-04  -.2380854E-04  -.1867381E-04  -.1933878E-04  -.2325285E-04
  -.2757106E-04  -.3130054E-04  -.2875141E-04  -.2349306E-04  -.2330994E-04
  -.2578529E-04  -.2511813E-04  -.2366470E-04  -.2536356E-04  -.2738303E-04
  -.2644625E-04  -.2751810E-04  -.3154562E-04  -.2991174E-04  -.2514328E-04
  -.2466145E-04  -.2840724E-04  -.3089529E-04  -.3189913E-04  -.3513593E-04
  -.3696070E-04  -.3532520E-04  -.3247270E-04  -.3122847E-04  -.3264631E-04
  -.3388348E-04  -.3025752E-04  -.2939712E-04  -.3355031E-04  -.3743605E-04
  -.3646278E-04  -.3550878E-04  -.3913049E-04  -.3936404E-04  -.3584587E-04
  -.3470434E-04  -.3533440E-04  -.3431067E-04  -.3555751E-04  -.3978713E-04
  -.4037553E-04  -.3804713E-04  -.3742621E-04  -.3776710E-04  -.3566922E-04
  -.3410776E-04  -.3793774E-04  -.4360476E-04  -.4292295E-04  -.3523782E-04
  -.2764723E-04  -.3079897E-04  -.4045810E-04  -.4289344E-04  -.3753802E-04
  -.4103435E-04  -.4802478E-04  -.4481932E-04  -.4168930E-04  -.4617145E-04
  -.4824286E-04  -.4571983E-04  -.4427621E-04  -.4625519E-04  -.5083862E-04
  -.5305067E-04  -.4865359E-04  -.4161924E-04  -.3987060E-04  -.4422399E-04
  -.4449615E-04  -.4655692E-04  -.5987233E-04  -.5721659E-04  -.4686580E-04
  -.5461351E-04  -.6208883E-04  -.6002099E-04  -.5064518E-04  -.4794392E-04
  -.5360840E-04  -.5134207E-04  -.4532714E-04  -.4673352E-04  -.4944537E-04
  -.5159367E-04  -.5368221E-04  -.5464834E-04  -.5457493E-04  -.5590026E-04
  -.5974097E-04  -.5921634E-04  -.5830824E-04  -.6551976E-04  -.7094290E-04
  -.7184424E-04  -.6614507E-04  -.5636054E-04  -.5714955E-04  -.6006313E-04
  -.5518597E-04  -.5664971E-04  -.6852426E-04  -.6772605E-04  -.5538109E-04
  -.5182338E-04  -.5632592E-04  -.6413889E-04  -.6719923E-04  -.6746786E-04
  -.6481063E-04  -.6483929E-04  -.7141166E-04  -.6474389E-04  -.5808325E-04
  -.7173720E-04  -.7275916E-04  -.6375742E-04  -.6607822E-04  -.6973804E-04
  -.6408789E-04  -.4986282E-04  -.4570791E-04  -.6465353E-04  -.8054348E-04
  -.7501285E-04  -.6533978E-04  -.6352055E-04  -.6271926E-04  -.6312450E-04
  -.6247414E-04  -.6546385E-04  -.6655147E-04  -.5693040E-04  -.5526452E-04
  -.7329829E-04  -.8543131E-04  -.8229824E-04  -.8046454E-04  -.7706156E-04
  -.8082372E-04  -.8291531E-04  -.8238309E-04  -.8493172E-04  -.8502372E-04
  -.8033156E-04  -.7937459E-04  -.8021085E-04  -.8376341E-04  -.8668573E-04
  -.7883126E-04  -.6718806E-04  -.6647307E-04  -.6738736E-04  -.6575481E-04
  -.6939506E-04  -.6862692E-04  -.6992934E-04  -.8664680E-04  -.9164924E-04
  -.7879428E-04  -.6736006E-04  -.7583601E-04  -.9631949E-04  -.9461142E-04
  -.8209454E-04  -.8347658E-04  -.8699638E-04  -.8036103E-04  -.7590672E-04
  -.9010809E-04  -.9963014E-04  -.1008066E-03  -.9169721E-04  -.8361097E-04
  -.8856244E-04  -.9006256E-04  -.8447752E-04  -.8171996E-04  -.8341739E-04
  -.8708445E-04  -.9366702E-04  -.8923205E-04  -.7879098E-04  -.8283639E-04
  -.8388341E-04  -.8184777E-04  -.8232225E-04  -.8052199E-04  -.9860082E-04
  -.1305550E-03  -.1161805E-03  -.8369705E-04  -.1006394E-03  -.1213716E-03
  -.1158518E-03  -.1059998E-03  -.9183117E-04  -.9011566E-04  -.9373058E-04
  -.9377853E-04  -.9805190E-04  -.9630100E-04  -.9533452E-04  -.1053616E-03
  -.9347373E-04  -.7616948E-04  -.8799424E-04  -.1033122E-03  -.1081171E-03
  -.1075451E-03  -.9292468E-04  -.7283162E-04  -.8395325E-04  -.1037419E-03
  -.1090738E-03  -.9671201E-04  -.8069943E-04  -.8551332E-04  -.1079532E-03
  -.1135138E-03  -.9540025E-04  -.8988496E-04  -.8996132E-04  -.8689553E-04
  -.8616104E-04  -.9570467E-04  -.9690351E-04  -.1031368E-03  -.1163148E-03
  -.1209810E-03  -.1153248E-03  -.1023488E-03  -.9451138E-04  -.9505103E-04
  -.1010012E-03  -.1065607E-03  -.9528863E-04  -.8552307E-04  -.8057535E-04
  -.8013860E-04  -.8704512E-04  -.9232307E-04  -.9805769E-04  -.8171509E-04
  -.7043012E-04  -.8746642E-04  -.1080594E-03  -.1170012E-03  -.1061294E-03
  -.8688431E-04  -.9163098E-04  -.1139912E-03  -.1093826E-03  -.7345790E-04
  -.7131914E-04  -.1129647E-03  -.1208149E-03  -.1092183E-03  -.1038368E-03
  -.1106011E-03  -.1219572E-03  -.1011654E-03  -.9531512E-04  -.1043059E-03
  -.9315286E-04  -.7616247E-04  -.8432660E-04  -.1296972E-03  -.1563578E-03
  -.1351142E-03  -.1305211E-03  -.1416501E-03  -.1144474E-03  -.1038786E-03
  -.1547058E-03  -.1657008E-03  -.1229402E-03  -.1000565E-03  -.9982029E-04
  -.1049486E-03  -.8050319E-04  -.5199987E-04  -.6900026E-04  -.1136474E-03
  -.1292255E-03  -.1222208E-03  -.1077965E-03  -.8664747E-04  -.7915548E-04
  -.9106365E-04  -.9608862E-04  -.9495513E-04  -.9106596E-04  -.1008745E-03
  -.1228299E-03  -.1146909E-03  -.7783562E-04  -.8260032E-04  -.1255890E-03
  -.1478224E-03  -.1360220E-03  -.1174044E-03  -.1183150E-03  -.1188706E-03
  -.1055026E-03  -.8983572E-04  -.9075604E-04  -.9360046E-04  -.1000770E-03
  -.1080731E-03  -.1150947E-03  -.1239433E-03  -.1327364E-03  -.1560293E-03
  -.1397393E-03  -.8856841E-04  -.6937257E-04  -.9457334E-04  -.1161845E-03
  -.1098499E-03  -.9003772E-04  -.9838858E-04  -.1252564E-03  -.1360749E-03
  -.1374375E-03  -.1222623E-03  -.1279800E-03  -.1301164E-03  -.1083099E-03
  -.8676889E-04  -.9331078E-04  -.1068926E-03  -.9222661E-04  -.8720032E-04
  -.1270917E-03  -.1453680E-03  -.1274697E-03  -.9242922E-04  -.7522821E-04
  -.9421597E-04  -.1139740E-03  -.1188684E-03  -.1252589E-03  -.1257902E-03
  -.1318351E-03  -.1372931E-03  -.1276234E-03  -.1193509E-03  -.1005953E-03
  -.1042915E-03  -.1416444E-03  -.1415707E-03  -.1141431E-03  -.1259978E-03
  -.1531022E-03  -.1229159E-03  -.9462246E-04  -.1154876E-03  -.1318604E-03
  -.1309269E-03  -.1160271E-03  -.1156613E-03  -.1319590E-03  -.1103253E-03
  -.1156867E-03  -.1231078E-03  -.1010589E-03  -.1055871E-03  -.1186141E-03
  -.1131848E-03  -.9921423E-04  -.8497566E-04  -.9666522E-04  -.1312677E-03
  -.1551512E-03  -.1660402E-03  -.1452043E-03  -.1068595E-03  -.1260344E-03
  -.1529902E-03  -.1233937E-03  -.7771239E-04  -.8583606E-04  -.1215726E-03
  -.1035305E-03  -.6940544E-04  -.7476627E-04  -.1038784E-03  -.1564062E-03
  -.1521309E-03  -.1067900E-03  -.8435023E-04  -.8682594E-04  -.1169797E-03
  -.1519736E-03  -.1636160E-03  -.1317150E-03  -.9104168E-04  -.7360566E-04
  -.8209321E-04  -.7970806E-04  -.6944759E-04  -.8472028E-04  -.1053564E-03
  -.1032664E-03  -.6980093E-04  -.4128107E-04  -.6758659E-04  -.1130481E-03
  -.1391906E-03  -.1345367E-03  -.8261590E-04  -.3722263E-04  -.6165749E-04
  -.1141808E-03  -.1233994E-03  -.8586914E-04  -.1039252E-03  -.1415414E-03
  -.1560524E-03  -.1223494E-03  -.7877329E-04  -.9563196E-04  -.1177494E-03
  -.1082856E-03  -.8791881E-04  -.7930394E-04  -.9827416E-04  -.1013010E-03
  -.1077121E-03  -.1050215E-03  -.7348877E-04  -.4804355E-04  -.6662057E-04
  -.1310927E-03  -.1284963E-03  -.6180673E-04  -.6999031E-04  -.1066929E-03
  -.8367958E-04  -.5197237E-04  -.7185411E-04  -.9605353E-04  -.8701929E-04
  -.1046157E-03  -.1337911E-03  -.1200788E-03  -.9100125E-04  -.9218391E-04
  -.1291380E-03  -.1746821E-03  -.1719678E-03  -.1014112E-03  -.5569257E-04
  -.5854545E-04  -.8174103E-04  -.1015659E-03  -.1298439E-03  -.1565898E-03
  -.1277056E-03  -.1029764E-03  -.1562089E-03  -.1654502E-03  -.9553210E-04
  -.6936612E-04  -.7421983E-04  -.7928693E-04  -.8613448E-04  -.8245157E-04
  -.6320626E-04  -.7238340E-04  -.1165375E-03  -.1362064E-03  -.1119255E-03
  -.1200602E-03  -.1778696E-03  -.1643073E-03  -.8256793E-04  -.6277858E-04
  -.6435402E-04  -.5622881E-04  -.8398668E-04  -.1029442E-03  -.9426063E-04
  -.1074405E-03  -.1096696E-03  -.5303515E-04  -.2753380E-04  -.5957049E-04
  -.1228753E-03  -.1169712E-03  -.5613634E-04  -.3673097E-04  -.7004882E-04
  -.1443443E-03  -.1343765E-03  -.5995671E-04  -.6923142E-04  -.1126163E-03
  -.8405136E-04  -.4964657E-04  -.7017306E-04  -.9979857E-04  -.7430468E-04
  -.5015795E-04  -.6587043E-04  -.5895270E-04  -.4438345E-05  -.4019894E-04
  -.1039211E-03  -.6677870E-04  -.5233590E-04  -.7040020E-04  -.7170257E-04
  -.9395550E-04  -.9534704E-04  -.1062662E-03  -.1147226E-03  -.1250764E-03
  -.9538672E-04  -.3262364E-04  -.9869942E-06  -.3117596E-04  -.1077318E-03
  -.1160134E-03  -.8250229E-04  -.1035866E-03  -.9757418E-04  -.5579682E-04
  -.9036837E-04  -.1296028E-03  -.1015942E-03  -.7721295E-04  -.8438139E-04
  -.1186510E-03  -.8636226E-04  -.2465355E-04  -.7639357E-04  -.8900791E-04
  -.3255268E-04  -.4484420E-04  -.6247545E-04  -.1501774E-04   .7601372E-05
   .1243734E-04   .2376106E-05  -.2866829E-04  -.4169625E-04  -.7413578E-04
  -.8715304E-04  -.3899543E-04  -.5911821E-04  -.8055276E-04  -.6060958E-04
  -.1100858E-03  -.1552686E-03  -.1319788E-03  -.4923552E-04  -.2828837E-04
  -.9571677E-04  -.9643125E-04  -.2248393E-04  -.1970456E-04  -.1135611E-03
  -.1536025E-03  -.6450168E-04  -.3167731E-05  -.1851191E-04  -.3356225E-04
  -.5425058E-04  -.6123567E-04  -.4441685E-04  -.4347475E-04  -.5897888E-04
  -.3657097E-04  -.1876342E-05   .2706107E-04  -.4596729E-05  -.6275532E-04
  -.3652327E-04   .1500913E-04  -.7989338E-06  -.4955300E-04  -.7600768E-04
  -.6515871E-04  -.5916676E-04  -.5036990E-04  -.3448146E-04  -.2083579E-04
  -.1530933E-05  -.9908124E-05  -.1649997E-04   .2868134E-04   .4662483E-04
  -.3877071E-05  -.4232697E-04  -.5417386E-04  -.8260041E-04  -.8749782E-04
  -.8096877E-04  -.1714472E-04   .5909326E-04   .3272219E-04  -.2380232E-04
  -.1312594E-04  -.6602919E-05  -.5353709E-04  -.8453932E-04  -.4851379E-04
  -.4277680E-04  -.1311336E-03  -.1122806E-03   .6841409E-05   .2831100E-04
  -.4318600E-04  -.5878050E-04  -.2043685E-04   .6203671E-05   .9426554E-05
  -.2422826E-04  -.5507281E-04  -.7990965E-04  -.5354746E-04  -.3236390E-04
  -.9016384E-04  -.7568068E-04   .8198342E-05   .7577538E-05  -.2866531E-04
  -.2216324E-04  -.2332729E-05   .7581817E-05   .3162517E-04   .4839588E-04
   .2016333E-04   .4924370E-05   .5738779E-04   .7854560E-04   .3346427E-04
   .6265256E-05  -.3377483E-04  -.7569200E-04  -.8305425E-05   .9979762E-04
   .9087746E-04  -.1997126E-04  -.6885053E-04   .9417911E-05   .6520986E-04
   .9720525E-05  -.4126377E-04  -.3160709E-04   .2225435E-04   .2858143E-04
  -.1231792E-04   .4048521E-05   .3012749E-04   .2766138E-04   .3413119E-04
   .3845953E-04   .4312699E-04   .3035183E-04   .1013919E-04   .6280094E-05
   .4827019E-05  -.2454175E-04  -.4194653E-04  -.2060687E-04   .3702522E-06
   .7308392E-05  -.6213939E-04  -.6994268E-04   .5731441E-04   .1148876E-03
   .2643901E-04  -.2558209E-04  -.1443364E-05  -.1644515E-05  -.4518640E-04
  -.6004819E-04  -.1569860E-04  -.2487164E-04  -.1279343E-04   .1928680E-04
   .5854532E-04   .9224804E-04   .8791320E-04   .5741776E-04   .5338746E-04
   .5051644E-04   .3426627E-04   .2637867E-04   .3901044E-04   .6718621E-04
   .5219962E-04   .9797086E-05   .4160630E-04   .8432127E-04   .4892839E-04
   .4502097E-04   .7480319E-04   .4112223E-04   .1103147E-04   .2716838E-04
   .5639154E-04   .6913704E-04   .3393828E-04   .5760889E-05   .4508725E-05
   .9117840E-05  -.9004766E-05   .4732837E-04   .1270370E-03   .7351274E-04
  -.3275559E-04  -.6315932E-04   .4652951E-05   .6629183E-04   .6479496E-04
   .5544331E-04   .7886223E-04   .8818523E-04   .8940910E-04   .4763275E-04
  -.4310717E-04  -.2007616E-04   .9645743E-04   .1410507E-03   .7933749E-04
   .1159533E-05  -.1087904E-05   .7844724E-04   .1477639E-03   .1516088E-03
   .6217089E-04  -.6125949E-05   .7420028E-05   .1070826E-04   .9717581E-05
  -.9995153E-05  -.7213482E-05   .4335572E-04   .8108589E-04   .7779830E-04
   .6764864E-04   .5939565E-04   .4128126E-04   .4694875E-04   .8219708E-04
   .9757314E-04   .2951644E-04  -.4251394E-05   .8332821E-04   .1346183E-03
   .6103603E-04   .5366808E-04   .1408105E-03   .1905411E-03   .1246446E-03
   .3374468E-04   .3935121E-04   .7725253E-04   .6632623E-04   .4818194E-04
   .6409252E-04   .1307287E-03   .1505639E-03   .1167689E-03   .5811464E-04
   .9549896E-05  -.4401066E-05   .5366966E-04   .1336695E-03   .1141840E-03
   .3508849E-04   .4374892E-04   .4708124E-04   .2265446E-04   .2329247E-04
   .3757721E-04   .4980766E-04   .7897234E-04   .1036740E-03   .1152750E-03
   .1322692E-03   .1267763E-03   .8645023E-04   .3096595E-04   .5901059E-04
   .1307683E-03   .1230590E-03   .1293977E-03   .1839222E-03   .1580759E-03
   .7317625E-04   .6354423E-04   .9954425E-04   .7527462E-04   .2005950E-04
   .6167630E-04   .1420524E-03   .1175160E-03   .3763618E-04   .1683327E-06
   .3592666E-04   .1036176E-03   .1300787E-03   .1307410E-03   .1365808E-03
   .1116369E-03   .8561151E-04   .8125847E-04   .9123637E-04   .9350364E-04
   .8314006E-04   .6743511E-04   .7515294E-04   .2202908E-04   .3308640E-04
   .1190775E-03   .1439351E-03   .1005710E-03   .9252297E-04   .1262891E-03
   .1396077E-03   .1404175E-03   .1659523E-03   .2052301E-03   .2230517E-03
   .1777067E-03   .1136552E-03   .9440934E-04   .1316878E-03   .1247035E-03
   .6544165E-04   .4208962E-04   .1186470E-03   .1652761E-03   .1112189E-03
   .6714172E-04   .1123398E-03   .1888612E-03   .2248022E-03   .2347871E-03
   .2199792E-03   .1900420E-03   .1610519E-03   .1745958E-03   .1772827E-03
   .1033710E-03   .8145989E-04   .1310326E-03   .1584575E-03   .1465177E-03
   .1370465E-03   .1315179E-03   .1212104E-03   .1503409E-03   .1775854E-03
   .1922044E-03   .2047944E-03   .2003411E-03   .1662173E-03   .1303411E-03
   .1062456E-03   .1227387E-03   .1320148E-03   .9050792E-04   .7895759E-04
   .5697854E-04  -.1943468E-05   .1686731E-04   .1406915E-03   .1858722E-03
   .9334998E-04   .6196531E-04   .1439391E-03   .1692309E-03   .1326879E-03
   .9308062E-04   .4904135E-04   .6103077E-04   .1762065E-03   .2241839E-03
   .1806337E-03   .1717758E-03   .1690624E-03   .1338093E-03   .1195227E-03
   .1244085E-03   .1420880E-03   .1784231E-03   .2384844E-03   .2379188E-03
   .1530974E-03   .1281136E-03   .1765285E-03   .1607796E-03   .1071554E-03
   .1329296E-03   .1912510E-03   .1640612E-03   .7093040E-04   .4257682E-05
   .9828765E-04   .2047968E-03   .1959002E-03   .1729489E-03   .2280391E-03
   .2463466E-03   .1657875E-03   .1252097E-03   .1398482E-03   .1068391E-03
   .1044670E-03   .2107377E-03   .2666741E-03   .2148847E-03   .1823883E-03
   .1738680E-03   .1423948E-03   .1497395E-03   .1910112E-03   .1729594E-03
   .1378702E-03   .1272537E-03   .1513574E-03   .1749209E-03   .1873933E-03
   .1709724E-03   .5793609E-04   .5226924E-04   .1961636E-03   .2085920E-03
   .8861217E-04   .7145536E-04   .1972334E-03   .2924948E-03   .2218029E-03
   .1029781E-03   .1429272E-03   .2302548E-03   .1935975E-03   .1516492E-03
   .1907558E-03   .2202765E-03   .2165086E-03   .1929679E-03   .1729752E-03
   .1808426E-03   .2107991E-03   .1969800E-03   .1452370E-03   .1348835E-03
   .1438460E-03   .1715923E-03   .2108542E-03   .2186563E-03   .1862193E-03
   .9936345E-04   .9136992E-04   .1415424E-03   .1856016E-03   .2083630E-03
   .1662142E-03   .1202846E-03   .1552521E-03   .2204284E-03   .2203660E-03
   .1628121E-03   .1135560E-03   .1526165E-03   .1804998E-03   .1646345E-03
   .1416063E-03   .1663656E-03   .2178080E-03   .2186288E-03   .1735046E-03
   .1581421E-03   .2038815E-03   .1837829E-03   .1724927E-03   .1857390E-03
   .1621164E-03   .1662753E-03   .2034234E-03   .2025453E-03   .2262742E-03
   .2100774E-03   .1265127E-03   .1206312E-03   .1817583E-03   .1962715E-03
   .1640434E-03   .1932719E-03   .2344113E-03   .1896541E-03   .1620932E-03
   .1975080E-03   .1811609E-03   .1242159E-03   .1250777E-03   .1893780E-03
   .1841147E-03   .1366015E-03   .1323028E-03   .1266043E-03   .1476733E-03
   .1870405E-03   .2073079E-03   .2221954E-03   .2101544E-03   .1962351E-03
   .2135005E-03   .2225184E-03   .2227667E-03   .2069343E-03   .1862921E-03
   .1828671E-03   .1875396E-03   .1905976E-03   .1719622E-03   .1070263E-03
   .6187374E-04   .1124990E-03   .2019199E-03   .2084761E-03   .2078033E-03
   .2344216E-03   .2285751E-03   .2365798E-03   .2546007E-03   .1597834E-03
   .7652039E-04   .1435846E-03   .2065400E-03   .2191996E-03   .2034150E-03
   .1972628E-03   .1937965E-03   .1102679E-03   .9589563E-04   .2204609E-03
   .2482851E-03   .1309476E-03   .8164887E-04   .1656344E-03   .2371775E-03
   .2057847E-03   .1890884E-03   .2038000E-03   .1994698E-03   .1968890E-03
   .2184070E-03   .2252220E-03   .2240064E-03   .2082831E-03   .1889214E-03
   .1764107E-03   .1568974E-03   .1732820E-03   .2224485E-03   .2148470E-03
   .1585489E-03   .1373549E-03   .1066376E-03   .9244223E-04   .1712513E-03
   .2202459E-03   .1664992E-03   .1290154E-03   .2064964E-03   .2697740E-03
   .1244335E-03  -.1950213E-04   .8863537E-04   .1940899E-03   .1346807E-03
   .7837676E-04   .7530069E-04   .8894583E-04   .8760678E-04   .4799075E-04
   .9956223E-04   .2165826E-03   .2792489E-03   .2157278E-03   .1670959E-03
   .2024947E-03   .1741693E-03   .7713759E-04   .1219901E-03   .2460318E-03
   .2115692E-03   .1351513E-03   .1443956E-03   .2139750E-03   .2236819E-03
   .1665978E-03   .1646128E-03   .2327368E-03   .2568707E-03   .1903972E-03
   .1562053E-03   .1832930E-03   .2065755E-03   .1807782E-03   .1425600E-03
   .1873377E-03   .1819094E-03   .1669015E-03   .2024716E-03   .1964418E-03
   .1576432E-03   .1023052E-03   .7276331E-04   .1047264E-03   .1493209E-03
   .1764815E-03   .1565184E-03   .1490138E-03   .1732109E-03   .1482968E-03
   .1806409E-03   .2138086E-03   .2125207E-03   .1698587E-03   .1361905E-03
   .1478831E-03   .1361563E-03   .1614812E-03   .2076519E-03   .1692687E-03
   .1272083E-03   .1179506E-03   .1552521E-03   .2087637E-03   .2376790E-03
   .2284849E-03   .2147872E-03   .1794136E-03   .1777003E-03   .2039041E-03
   .1703510E-03   .1833375E-03   .2574338E-03   .3061349E-03   .2826523E-03
   .2464801E-03   .2334784E-03   .2218035E-03   .2044647E-03   .1292096E-03
   .7231149E-04   .1405637E-03   .2286360E-03   .2040138E-03   .1595728E-03
   .1762669E-03   .1722091E-03   .1005616E-03   .8371527E-04   .8958205E-04
   .1434802E-03   .2333951E-03   .2725477E-03   .2490030E-03   .2112784E-03
   .2127699E-03   .2109402E-03   .2073074E-03   .2632945E-03   .3030881E-03
   .2429530E-03   .1637876E-03   .1363588E-03   .1552631E-03   .1600898E-03
   .1747041E-03   .2242113E-03   .2498228E-03   .2124769E-03   .1843499E-03
   .2067430E-03   .2225460E-03   .2031649E-03   .1448343E-03   .1691444E-03
   .2369040E-03   .2248112E-03   .1946329E-03   .2334276E-03   .2185166E-03
   .1219927E-03   .1291881E-03   .2505036E-03   .2787038E-03   .1779311E-03
   .1390162E-03   .1933525E-03   .1720204E-03   .9483824E-04   .1047725E-03
   .1591740E-03   .2144450E-03   .2384422E-03   .2049964E-03   .1794971E-03
   .2010860E-03   .2225599E-03   .2534200E-03   .2619049E-03   .2332462E-03
   .1971916E-03   .2080689E-03   .2288369E-03   .2122779E-03   .1994860E-03
   .1995167E-03   .1907818E-03   .1221375E-03   .9431529E-04   .1809823E-03
   .2372172E-03   .1875920E-03   .1489301E-03   .1279701E-03   .1631723E-03
   .1868166E-03   .1587262E-03   .1710834E-03   .1845437E-03   .1395275E-03
   .1071662E-03   .1310672E-03   .1475373E-03   .1458232E-03   .1276249E-03
   .1062699E-03   .1211443E-03   .1815566E-03   .2202834E-03   .2486471E-03
   .2443365E-03   .1837575E-03   .1234205E-03   .1411877E-03   .2115790E-03
   .2365617E-03   .2009444E-03   .1948612E-03   .2237419E-03   .2280237E-03
   .1866138E-03   .1558145E-03   .1474270E-03   .1511019E-03   .1968035E-03
   .1741575E-03   .1191770E-03   .1619676E-03   .2324394E-03   .2432333E-03
   .2117792E-03   .1824725E-03   .1861762E-03   .1914898E-03   .1935541E-03
   .1800089E-03   .1408116E-03   .1034778E-03   .1880710E-03   .2446013E-03
   .8844976E-04   .2157289E-04   .1726061E-03   .2280896E-03   .1122766E-03
   .8576389E-04   .1791917E-03   .1992653E-03   .1302660E-03   .1128305E-03
   .1601621E-03   .1860975E-03   .1171706E-03   .1324726E-03   .2488601E-03
   .1877399E-03   .1205875E-03   .1834514E-03   .2216635E-03   .1473914E-03
   .6320283E-04   .5686171E-04   .1518795E-03   .2158985E-03   .1581844E-03
   .1151731E-03   .1128969E-03   .6459701E-04   .8658054E-04   .1714345E-03
   .1577551E-03   .9547588E-04   .1169084E-03   .1881580E-03   .1823020E-03
   .1095812E-03   .6900181E-04   .9789414E-04   .1674796E-03   .1850486E-03
   .1451540E-03   .9736535E-04   .7925402E-04   .8488678E-04   .9845306E-04
   .1287636E-03   .1608570E-03   .1943053E-03   .2046624E-03   .1716871E-03
   .1311547E-03   .9777613E-04   .9640744E-04   .1712788E-03   .2430070E-03
   .2137752E-03   .1597694E-03   .1020811E-03   .5430712E-04   .8997895E-04
   .1497971E-03   .1597120E-03   .1495903E-03   .1773330E-03   .2078181E-03
   .2123277E-03   .1826143E-03   .1354244E-03   .1143063E-03   .7310331E-04
   .9349916E-04   .1288726E-03   .1230519E-03   .1199302E-03   .1687966E-03
   .1608887E-03   .1191957E-03   .1388565E-03   .2055046E-03   .1883290E-03
   .9500461E-04   .7569483E-04   .1808774E-03   .2344573E-03   .1798082E-03
   .1472575E-03   .1466094E-03   .1480108E-03   .1708897E-03   .1969354E-03
   .1992466E-03   .1848610E-03   .1313367E-03   .6899662E-04   .8775457E-04
   .1005690E-03   .1363733E-03   .1647518E-03   .9921708E-04   .8043478E-04
   .1490720E-03   .1713893E-03   .1259286E-03   .7443266E-04   .5663374E-04
   .8147655E-04   .1347598E-03   .1194904E-03   .7370068E-04   .8980959E-04
   .1320976E-03   .1293556E-03   .1015210E-03   .1266683E-03   .1595697E-03
   .1747113E-03   .1846994E-03   .1858219E-03   .1858912E-03   .1574032E-03
   .8620728E-04   .8719047E-04   .1086930E-03   .1124830E-03   .1161939E-03
   .1228305E-03   .1047068E-03   .6385961E-04   .9804854E-04   .1545973E-03
   .1513415E-03   .7390087E-04   .6800817E-04   .1439070E-03   .1696666E-03
   .1698872E-03   .2105393E-03   .2388711E-03   .2066593E-03   .1508442E-03
   .9138868E-04   .9973559E-04   .1757071E-03   .1585855E-03   .3326911E-04
  -.2428069E-04   .5654329E-04   .1337439E-03   .1237030E-03   .4784929E-04
  -.1890406E-04   .2581494E-04   .8900094E-04   .1172640E-03   .1419024E-03
   .1360123E-03   .1192997E-03   .1432550E-03   .1675577E-03   .1301832E-03
   .6856366E-04   .8099531E-04   .1335319E-03   .1128751E-03   .8956346E-04
   .1275432E-03   .1308333E-03   .8704180E-04   .1176068E-03   .2099286E-03
   .2333827E-03   .1516508E-03   .8305293E-04   .8768951E-04   .9987549E-04
   .6885217E-04   .1682398E-04  -.3212414E-04  -.9675675E-05   .5222736E-04
   .9732705E-04   .1003344E-03   .6219103E-04   .4024200E-04   .8306318E-04
   .1340745E-03   .9552578E-04   .3985648E-04   .6240873E-04   .1151952E-03
   .1610682E-03   .1972864E-03   .1712338E-03   .8414546E-04   .6564719E-04
   .1141441E-03   .1037807E-03   .7275944E-04   .1007839E-03   .1499776E-03
   .7932243E-04   .1822317E-04   .5807441E-04   .3736999E-04   .4082501E-04
   .8967373E-04   .4725882E-04   .7068986E-04   .1696212E-03   .1760914E-03
   .9931171E-04  -.7617112E-06   .2181698E-05   .6814967E-04   .1135290E-03
   .8752129E-04   .6404741E-04   .8250644E-04   .8224797E-04   .2042451E-04
   .1184381E-04   .8474188E-04   .1092353E-03   .8945364E-04   .3009328E-04
  -.1200292E-05   .2710481E-04   .7670755E-04   .9843653E-04   .1002071E-03
   .1172676E-03   .1121723E-03   .8914433E-04   .7097068E-04   .6093052E-04
   .1024769E-03   .1528343E-03   .1516683E-03   .8764376E-04   .3709847E-06
  -.1501819E-04   .1928907E-04   .5153369E-04   .9735159E-04   .1196077E-03
   .1283864E-03   .1417725E-03   .1300750E-03   .7001441E-04   .4777619E-04
   .7234194E-04   .9961520E-04   .9792991E-04   .4720303E-04   .4024837E-04
   .4172322E-04   .7401369E-04   .1002046E-03   .9564543E-04   .1051308E-03
   .9069593E-04   .5443259E-04   .8350945E-04   .1421542E-03   .1277700E-03
   .3024726E-04   .1007173E-04   .6656787E-04   .1019090E-03   .1099570E-03
   .9326485E-04   .6230602E-04   .3464753E-04   .4578031E-04   .7358063E-04
   .8677518E-04   .1125021E-03   .1175968E-03   .6512772E-04   .1995735E-04
  -.3690777E-05   .2548490E-04   .8079184E-04   .1140948E-03   .8607886E-04
   .3937453E-04   .5837255E-04   .4472370E-04  -.4192924E-05   .3832834E-04
   .1044625E-03   .1091434E-03   .5285201E-04   .3178690E-04   .5873089E-04
   .8289577E-04   .1001337E-03   .8636845E-04   .6322542E-04   .3960336E-04
   .5615216E-05   .6073342E-04   .1608211E-03   .1776014E-03   .1545449E-03
   .1304632E-03   .1286274E-03   .1241659E-03   .4861313E-04   .3161718E-04
   .7642273E-04   .1215586E-03   .1463191E-03   .1088766E-03   .9755576E-04
   .1056525E-03   .1905147E-04   .1228005E-04   .9452410E-04   .1010660E-03
   .6141024E-04   .5924626E-04   .4343991E-04   .2279571E-04   .2313055E-05
   .5119250E-05   .5794429E-04   .9850109E-04   .1295896E-03   .1249123E-03
   .6274558E-04   .3317801E-05   .4616678E-05   .1829996E-04   .2355450E-04
   .5200518E-05  -.8378530E-05   .2726046E-04   .1020903E-03   .1284430E-03
   .2417440E-04  -.5973786E-04  -.2253858E-04   .6812818E-04   .8583812E-04
   .4633069E-04   .3798712E-04   .7387882E-04   .6451963E-04   .2753661E-04
   .7829699E-04   .1254064E-03   .6220656E-04  -.3885221E-04  -.1053328E-04
   .1166167E-03   .1362159E-03   .4983794E-04   .5414288E-04   .6292316E-04
  -.3699871E-05   .1399796E-04   .8817812E-04   .7328799E-04  -.1620384E-06
   .1609791E-05   .7520626E-04   .1064607E-03   .7717782E-04   .1107121E-03
   .1724159E-03   .1236109E-03   .5202264E-04   .3844443E-04   .7245585E-04
   .8984730E-04   .5501602E-04   .1946025E-04   .2766133E-04   .6233643E-04
   .5634024E-04   .4203631E-04   .9080106E-04   .1009123E-03   .3941148E-04
   .4795005E-04   .6572356E-04   .3678790E-04   .4174155E-05  -.1516816E-04
  -.6956286E-06   .2488035E-04   .2066789E-04  -.1093561E-04   .5174584E-06
   .6171381E-04   .8801704E-04   .6344334E-04   .9082686E-04   .1188605E-03
   .5034032E-04   .2066587E-04   .5754847E-04   .5431865E-04   .8195839E-05
  -.2806400E-04  -.1162869E-04   .1954325E-04   .2417342E-04   .1393673E-04
   .1976250E-04   .4684907E-04   .4134851E-04   .2180497E-04   .4542922E-04
   .7053205E-04   .4899196E-04   .6122339E-04   .1333315E-03   .1154820E-03
   .1624235E-08  -.4146680E-04  -.8960944E-06   .2557201E-04  -.1184514E-04
  -.9501399E-04  -.6512785E-04   .4114582E-04   .6634910E-04   .4996386E-04
   .4104091E-04  -.1031994E-04  -.4624103E-04   .4307129E-05   .3132757E-04
  -.2407082E-04  -.5619740E-04   .2967819E-04   .1394669E-03   .6932816E-04
  -.1046893E-03  -.8834153E-04   .6832264E-04   .8104164E-04  -.2707834E-04
  -.5269736E-04  -.2440911E-05   .1162177E-04  -.3747946E-04  -.5500939E-04
  -.1980885E-04  -.6112273E-04  -.5967982E-04   .4555574E-05  -.1860682E-04
  -.4752740E-04   .1887452E-05   .7620869E-04   .5880235E-04  -.5558518E-05
  -.3685344E-05   .6205051E-04   .5691943E-04  -.1706234E-04  -.1116913E-03
  -.1543768E-03  -.9325517E-04  -.5126527E-04  -.3350038E-04  -.6785926E-05
  -.5171969E-05  -.2497229E-04  -.6699635E-06   .2930957E-04   .3652739E-04
   .1487661E-04  -.9093418E-05  -.1133031E-04  -.1304181E-04  -.4509458E-04
  -.5745296E-04   .6300995E-05   .5974109E-04   .1989691E-04  -.4967168E-04
  -.4655736E-04  -.5916903E-05   .3496365E-05  -.2262665E-07   .3096485E-05
  -.5778586E-04  -.8273455E-04  -.3752302E-04  -.5708110E-04  -.6116743E-04
  -.6052916E-04  -.4506254E-04  -.3583310E-05   .2303085E-04  -.1588815E-04
  -.3105126E-04   .2890237E-05   .7486713E-05   .2243637E-04  -.3113111E-05
  -.2493206E-04   .7574028E-05   .1819577E-04  -.1749663E-04  -.4761116E-04
  -.1036831E-04   .5838552E-05  -.2951300E-04  -.1777841E-04   .1470236E-04
   .2715800E-04   .1220173E-04   .2067198E-04   .1830726E-04  -.5422589E-04
  -.8427544E-04  -.5970358E-04  -.2035791E-04   .2762092E-04   .3294710E-04
  -.1004576E-04   .1057099E-04   .1601805E-04  -.4207176E-04  -.6643347E-04
  -.7495477E-04  -.1007449E-03  -.6303378E-04   .2259040E-04   .5286622E-04
  -.3588600E-05  -.5980505E-04  -.1718517E-04   .3153603E-04  -.1775008E-04
  -.5745975E-04  -.3808449E-04   .2354701E-05   .4539977E-04   .3292190E-04
   .1264016E-04   .2624228E-04   .3927734E-04   .3817378E-04   .1470519E-04
  -.4162553E-04  -.5331033E-04   .7011785E-05   .2150629E-04  -.5631949E-04
  -.6144254E-04  -.1391963E-04  -.1213764E-04  -.2449528E-04  -.6645633E-05
   .3745842E-05  -.4831248E-05  -.4614511E-04  -.5994282E-04  -.4696341E-04
  -.4914635E-04  -.2455397E-04  -.1015037E-04  -.1927747E-04   .8823447E-06
   .5225197E-05  -.7975647E-04  -.1179776E-03  -.4674241E-04  -.4014263E-04
  -.1297182E-03  -.1661766E-03  -.8589842E-04  -.3109936E-04  -.9083426E-04
  -.1339650E-03  -.1093958E-03  -.7649434E-04  -.4976187E-04  -.3220430E-04
  -.4006284E-04  -.6794791E-04  -.7161640E-04  -.6843033E-04  -.5377634E-04
  -.3596466E-04  -.3057217E-04  -.5292627E-04  -.1104518E-03  -.1388905E-03
  -.1271008E-03  -.8225440E-04  -.5230492E-04  -.1892128E-04  -.2962621E-04
  -.9747581E-04  -.9694768E-04  -.3894990E-04  -.2863575E-04  -.5846842E-04
  -.4712740E-04  -.3712081E-04  -.3011084E-04  -.5158891E-04  -.5303279E-04
  -.1259794E-04   .1350661E-05  -.4736021E-05  -.2374534E-04  -.3459098E-04
  -.4409695E-05   .2427844E-04   .4405850E-04   .6483417E-04  -.5104157E-05
  -.7579884E-04  -.5672692E-04  -.4395909E-05  -.9720982E-05  -.5514630E-04
  -.8930278E-04  -.6394324E-04  -.9444011E-05  -.1916250E-04  -.8026012E-04
  -.6695154E-04   .8673862E-05  -.2285488E-04  -.1050763E-03  -.8529956E-04
  -.1900062E-04  -.3029812E-04  -.3447387E-04  -.3748872E-05  -.1600597E-04
  -.5082264E-04  -.6877143E-04  -.8250249E-04  -.8044388E-04  -.9102242E-04
  -.9453388E-04  -.4388162E-04  -.3445196E-04  -.1241774E-03  -.1610792E-03
  -.4257739E-04   .1127126E-04  -.6319246E-04  -.1076193E-03  -.8392165E-04
  -.4751306E-04  -.9342999E-04  -.1348358E-03  -.7883297E-04  -.2275408E-04
  -.7770784E-04  -.1086797E-03  -.6572627E-04  -.3662678E-04  -.4656407E-04
  -.5802469E-04  -.5677925E-04  -.3565020E-04   .2028473E-04   .3026873E-04
  -.2858751E-04  -.7041132E-04  -.6522487E-04  -.4288888E-04  -.1998584E-04
  -.3180066E-04  -.5051490E-04  -.1608588E-04   .3395497E-04  -.1119934E-04
  -.9714051E-04  -.1118201E-03  -.8148150E-04  -.4771176E-04  -.5611582E-04
  -.4345485E-04   .3470093E-06  -.1250345E-04  -.8647698E-04  -.5905068E-04
  -.1695913E-04  -.2590123E-04  -.7946145E-05  -.2617938E-04  -.9067461E-04
  -.1178629E-03  -.1312508E-03  -.1021998E-03  -.8667299E-04  -.1481207E-03
  -.1425458E-03  -.5867363E-04  -.8854000E-05  -.1578464E-04  -.7939370E-05
  -.4366702E-05   .2070118E-05  -.2335364E-04  -.7619032E-04  -.1010027E-03
  -.6899119E-04  -.6831861E-04  -.8406050E-04  -.7597322E-04  -.4673309E-04
   .2132188E-05  -.3238868E-04  -.1333940E-03  -.1359303E-03  -.7729563E-04
  -.7999259E-04  -.8290455E-04  -.6041524E-04  -.1003145E-03  -.1250234E-03
  -.1277497E-03  -.1460181E-03  -.1241859E-03  -.1062260E-03  -.1124177E-03
  -.9535291E-04  -.4966656E-04   .1243566E-04   .1600167E-04  -.4559470E-04
  -.8574720E-04  -.7070514E-04  -.3236091E-04  -.5732927E-04  -.1522712E-03
  -.2151567E-03  -.1723507E-03  -.3989618E-04  -.8455404E-05  -.9308974E-04
  -.1091685E-03  -.6144953E-04  -.9444550E-04  -.1203939E-03  -.8514446E-04
  -.5836981E-04  -.6605891E-04  -.6038519E-04  -.1333548E-05   .4837331E-05
  -.6886199E-04  -.9171660E-04  -.8985649E-04  -.9488399E-04  -.1186451E-03
  -.1212861E-03  -.6799219E-04  -.3161370E-04  -.5859517E-04  -.1552818E-03
  -.1566339E-03  -.9687607E-04  -.1070547E-03  -.7553642E-04   .3157726E-04
   .8872110E-04  -.8455791E-05  -.1208013E-03  -.9559748E-04  -.4577278E-04
  -.5293111E-04  -.3661670E-04  -.2810794E-05  -.5517777E-04  -.1178524E-03
  -.1292817E-03  -.8924816E-04  -.4063815E-04  -.3929850E-04  -.4954635E-04
  -.5604728E-04  -.3980833E-04  -.2650486E-04  -.5489950E-04  -.8825537E-04
  -.8197602E-04  -.4832147E-04  -.5290241E-04  -.8258080E-04  -.9239258E-04
  -.7548150E-04  -.5547447E-04  -.9011426E-04  -.9382393E-04  -.4384167E-04
  -.9702584E-04  -.1575049E-03  -.8830456E-04  -.2166930E-04  -.7499332E-04
  -.1139398E-03  -.5998924E-04  -.7761216E-05  -.2089787E-04  -.5490124E-04
  -.2409955E-04  -.2314475E-04  -.1222805E-03  -.1450228E-03  -.8251513E-04
  -.1152455E-03  -.1587072E-03  -.8937959E-04  -.8256706E-05  -.3129685E-04
  -.1302310E-03  -.1061437E-03  -.1180255E-04  -.5573089E-04  -.1533918E-03
  -.1140558E-03  -.1029464E-04  -.9178859E-04  -.1594741E-03  -.1219944E-03
  -.1643496E-03  -.1415189E-03  -.4679447E-04  -.3808419E-04  -.9848595E-04
  -.1397555E-03  -.1266454E-03  -.1178437E-03  -.9931700E-04  -.6865252E-04
  -.9214412E-04  -.1243875E-03  -.1334428E-03  -.1028664E-03  -.5504112E-04
  -.5949219E-04  -.9209287E-04  -.1099764E-03  -.1329959E-03  -.1550637E-03
  -.1587055E-03  -.1368946E-03  -.6851711E-04  -.5139873E-04  -.1657138E-03
  -.2044079E-03  -.9777441E-04  -.3158971E-04  -.4507118E-04  -.8219184E-04
  -.9897508E-04  -.9573067E-04  -.9011327E-04  -.1008993E-03  -.1255957E-03
  -.1292824E-03  -.1167299E-03  -.8818223E-04  -.9068163E-04  -.8242962E-04
  -.7544530E-04  -.8059737E-04  -.5819663E-04  -.3812359E-04  -.6710657E-04
  -.1011781E-03  -.1130023E-03  -.1256064E-03  -.1271513E-03  -.1200502E-03
  -.8320048E-04  -.6101313E-04  -.4917968E-04  -.4550779E-04  -.7158980E-04
  -.1188800E-03  -.1680979E-03  -.1650740E-03  -.1591939E-03  -.1336275E-03
  -.1044918E-03  -.1192514E-03  -.1135250E-03  -.6826428E-04  -.6252083E-04
  -.1106853E-03  -.1804873E-03  -.1833705E-03  -.1283938E-03  -.1124725E-03
  -.1151064E-03  -.9436988E-04  -.5153633E-04  -.4368320E-04  -.1125166E-03
  -.1725262E-03  -.1730675E-03  -.1456620E-03  -.1124902E-03  -.8373296E-04
  -.6100627E-04  -.7215763E-04  -.9923205E-04  -.1047114E-03  -.9908348E-04
  -.8613007E-04  -.7505231E-04  -.8834422E-04  -.6864204E-04  -.8626181E-04
  -.1175184E-03  -.1198266E-03  -.1278500E-03  -.1204376E-03  -.1012910E-03
  -.7708889E-04  -.3341783E-04  -.5762324E-04  -.1321652E-03  -.1498555E-03
  -.1344432E-03  -.1056355E-03  -.5834938E-04  -.3850350E-04  -.8245494E-04
  -.1428206E-03  -.1273094E-03  -.7543533E-04  -.8790159E-04  -.1024995E-03
  -.1366353E-03  -.1852345E-03  -.1658040E-03  -.1284778E-03  -.1191043E-03
  -.1257082E-03  -.9347865E-04  -.7526917E-04  -.8545982E-04  -.7661839E-04
  -.7854300E-04  -.1074985E-03  -.1487720E-03  -.1705801E-03  -.1590972E-03
  -.1192528E-03  -.1105005E-03  -.1615071E-03  -.1482738E-03  -.7224892E-04
  -.5840764E-04  -.1077727E-03  -.1474731E-03  -.1390393E-03  -.1296070E-03
  -.1195591E-03  -.1025934E-03  -.1062457E-03  -.1182101E-03  -.4057754E-04
   .3936249E-04  -.7175941E-04  -.2488827E-03  -.2430926E-03  -.1117980E-03
  -.3476489E-04  -.8625266E-04  -.1710009E-03  -.1350400E-03  -.7307115E-04
  -.9061672E-04  -.1429148E-03  -.1293666E-03  -.7660364E-04  -.1071492E-03
  -.1525584E-03  -.1181290E-03  -.1023053E-03  -.1326980E-03  -.1856382E-03
  -.1856717E-03  -.1344678E-03  -.1200912E-03  -.1285284E-03  -.1563899E-03
  -.2041372E-03  -.2430092E-03  -.2296474E-03  -.9210992E-04  -.1033571E-04
  -.8739591E-04  -.1469799E-03  -.1182422E-03  -.9653345E-04  -.1270823E-03
  -.1240544E-03  -.8064450E-04  -.1071429E-03  -.1580645E-03  -.1398772E-03
  -.9562944E-04  -.9033800E-04  -.9375024E-04  -.8383900E-04  -.9144443E-04
  -.6267107E-04  -.4954988E-04  -.6373366E-04  -.8930227E-04  -.1063238E-03
  -.1159588E-03  -.1269823E-03  -.9619028E-04  -.8569909E-04  -.1373959E-03
  -.1539791E-03  -.5994036E-04  -.2596314E-04  -.1240748E-03  -.1346537E-03
  -.6733730E-04  -.9038406E-04  -.1145900E-03  -.6500383E-04  -.7004301E-04
  -.8444014E-04  -.5664762E-04  -.3506342E-04  -.4816946E-04  -.8942770E-04
  -.1074756E-03  -.6335477E-04  -.2129636E-04  -.8614789E-04  -.1248474E-03
  -.7015211E-04  -.6919005E-04  -.1115703E-03  -.1650319E-03  -.1659693E-03
  -.1418585E-03  -.1199962E-03  -.1072630E-03  -.9674087E-04  -.8439785E-04
  -.1152293E-03  -.1346517E-03  -.1083884E-03  -.6801805E-04  -.9588501E-04
  -.1670753E-03  -.1385859E-03  -.8269534E-04  -.8973204E-04  -.1142193E-03
  -.1252865E-03  -.1315424E-03  -.1000838E-03  -.7579482E-04  -.6076804E-04
  -.7454843E-04  -.1504810E-03  -.1758789E-03  -.1501040E-03  -.1104747E-03
  -.8086587E-04  -.1144358E-03  -.1202718E-03  -.5419259E-04  -.4893225E-04
  -.1145955E-03  -.1519827E-03  -.1232695E-03  -.1516700E-03  -.1759135E-03
  -.1310481E-03  -.1281430E-03  -.1336734E-03  -.1599349E-03  -.1353333E-03
  -.4813811E-04  -.4497113E-04  -.1073322E-03  -.1291279E-03  -.1213018E-03
  -.1348012E-03  -.1434000E-03  -.1368895E-03  -.9664033E-04  -.8272694E-04
  -.9564668E-04  -.8645291E-04  -.7756023E-04  -.9169278E-04  -.1557272E-03
  -.1567565E-03  -.7628070E-04  -.3544200E-04  -.9688402E-04  -.1964915E-03
  -.2145758E-03  -.1658830E-03  -.1169172E-03  -.1023897E-03  -.1006980E-03
  -.8007378E-04  -.9321174E-04  -.1260819E-03  -.5518257E-04   .3814751E-04
  -.3001850E-04  -.1416250E-03  -.9380988E-04  -.2559586E-04  -.5804781E-04
  -.1034641E-03  -.1345339E-03  -.1434017E-03  -.1468325E-03  -.1329002E-03
  -.1120256E-03  -.9893020E-04  -.7955357E-04  -.9691982E-04  -.1447554E-03
  -.1545211E-03  -.1461945E-03  -.1206402E-03  -.7872779E-04  -.9060758E-04
  -.1444549E-03  -.1491554E-03  -.9746042E-04  -.3636440E-04  -.6734843E-04
  -.1409346E-03  -.1159198E-03  -.4668847E-04  -.4070971E-04  -.9345225E-04
  -.1352723E-03  -.1539111E-03  -.1269701E-03  -.8795788E-04  -.1047172E-03
  -.1165828E-03  -.1302940E-03  -.1334442E-03  -.1095273E-03  -.7633654E-04
  -.8700691E-04  -.9877667E-04  -.5898770E-04  -.5340319E-04  -.8736659E-04
  -.1288149E-03  -.1027914E-03  -.6822424E-04  -.9657347E-04  -.7467000E-04
  -.5040235E-04  -.1207800E-03  -.1850418E-03  -.1548695E-03  -.1055262E-03
  -.1099378E-03  -.1670246E-03  -.2120874E-03  -.1594917E-03  -.7319808E-04
  -.7247749E-04  -.1088457E-03  -.8881915E-04  -.5668035E-04  -.9230595E-04
  -.1470436E-03  -.1194056E-03  -.1045687E-03  -.1681905E-03  -.1756998E-03
  -.1206274E-03  -.1053440E-03  -.1443546E-03  -.1390647E-03  -.9285704E-04
  -.1187948E-03  -.1800256E-03  -.1776440E-03  -.9347143E-04  -.6768446E-04
  -.1866895E-03  -.2293368E-03  -.1197200E-03  -.7705225E-04  -.1720306E-03
  -.2148099E-03  -.1477331E-03  -.8396470E-04  -.6833386E-04  -.1009006E-03
  -.1595814E-03  -.1688527E-03  -.1144986E-03  -.1087123E-03  -.1388290E-03
  -.1640579E-03  -.1681832E-03  -.1185906E-03  -.3232791E-04  -.2883120E-04
  -.1122838E-03  -.1163826E-03  -.6400003E-04  -.6439879E-04  -.8426331E-04
  -.1001590E-03  -.1139046E-03  -.1158627E-03  -.1227513E-03  -.1440846E-03
  -.1487897E-03  -.1373431E-03  -.1080948E-03  -.1180480E-03  -.1347543E-03
  -.1197026E-03  -.1248806E-03  -.1656706E-03  -.1350006E-03  -.8763858E-04
  -.9707427E-04  -.1016823E-03  -.5452605E-04  -.5868198E-04  -.1024087E-03
  -.8790273E-04  -.7344056E-04  -.1464517E-03  -.1636401E-03  -.9269039E-04
  -.6107349E-04  -.8349323E-04  -.1328578E-03  -.1427779E-03  -.1243296E-03
  -.1453319E-03  -.1620064E-03  -.1013743E-03  -.6352964E-04  -.1418850E-03
  -.1732035E-03  -.1429194E-03  -.1499196E-03  -.1353719E-03  -.1231736E-03
  -.1426649E-03  -.1792673E-03  -.1943368E-03  -.2473728E-03  -.2332502E-03
  -.1448078E-03  -.1161443E-03  -.1332082E-03  -.1662084E-03  -.2054844E-03
  -.1742351E-03  -.5543838E-04  -.5502222E-06  -.4184334E-04  -.1114422E-03
  -.1451625E-03  -.9662365E-04  -.4569737E-04  -.7480716E-04  -.1085457E-03
  -.9028050E-04  -.7092775E-04  -.9810362E-04  -.1795489E-03  -.1591861E-03
  -.8744612E-04  -.9449128E-04  -.1352176E-03  -.1373171E-03  -.1789758E-03
  -.1763190E-03  -.1159498E-03  -.8186209E-04  -.7015675E-04  -.1052134E-03
  -.1665952E-03  -.1263063E-03  -.4870581E-04  -.8000563E-04  -.1869166E-03
  -.2004734E-03  -.9971889E-04  -.8537545E-04  -.1863457E-03  -.1608605E-03
  -.5313514E-04  -.6050537E-04  -.1415220E-03  -.1607659E-03  -.1391251E-03
  -.1270024E-03  -.1364103E-03  -.1391045E-03  -.1372994E-03  -.1505509E-03
  -.1937579E-03  -.1389313E-03  -.3835534E-04  -.2466307E-04  -.8408132E-04
  -.1219146E-03  -.1042456E-03  -.7532691E-04  -.1247016E-03  -.1982689E-03
  -.1591154E-03  -.6510024E-04  -.6677164E-04  -.1307523E-03  -.8913644E-04
   .1698982E-04  -.1203879E-04  -.1192534E-03  -.1667041E-03  -.1480129E-03
  -.1689003E-03  -.1713700E-03  -.1198858E-03  -.1139823E-03  -.8224958E-04
  -.5512164E-04  -.5268882E-04  -.5587655E-04  -.8372837E-04  -.1005966E-03
  -.7946360E-04  -.6960451E-04  -.6218605E-04  -.4662505E-04  -.4002749E-04
  -.5192203E-04  -.7949810E-04  -.7168480E-04  -.5407309E-04  -.6904780E-04
  -.8834280E-04  -.1136651E-03  -.9157446E-04  -.4436357E-04  -.4104536E-04
  -.8608417E-04  -.1178465E-03  -.1143998E-03  -.9593727E-04  -.6397014E-04
  -.4924182E-04  -.8265702E-04  -.9849850E-04  -.4308720E-04  -.2020750E-04
  -.8652211E-04  -.1559763E-03  -.1460400E-03  -.8655706E-04  -.3889851E-04
  -.9658573E-04  -.1706086E-03  -.1505006E-03  -.9937196E-04  -.1014564E-03
  -.1411933E-03  -.1392108E-03  -.1070929E-03  -.9705358E-04  -.1134973E-03
  -.1513731E-03  -.1725173E-03  -.1894743E-03  -.2125794E-03  -.1448451E-03
  -.7260464E-04  -.1005378E-03  -.1689684E-03  -.1329357E-03  -.9241219E-04
  -.1505948E-03  -.1467901E-03  -.4754552E-04  -.3331637E-04  -.9937279E-04
  -.1173214E-03  -.7562392E-04  -.6996121E-04  -.1018775E-03  -.1145435E-03
  -.1060133E-03  -.1000449E-03  -.1031395E-03  -.1046078E-03  -.1127003E-03
  -.1352944E-03  -.1300614E-03  -.9545838E-04  -.6285936E-04  -.9137653E-04
  -.1876090E-03  -.2123992E-03  -.9011827E-04  -.4779082E-04  -.1417269E-03
  -.1264004E-03  -.2810474E-04  -.5886119E-04  -.1304519E-03  -.1269466E-03
  -.9518253E-04  -.1005788E-03  -.1430615E-03  -.1732155E-03  -.1433831E-03
  -.5375425E-04  -.3969003E-04  -.9533364E-04  -.1190356E-03  -.1125993E-03
  -.1275317E-03  -.1161391E-03  -.7970240E-04  -.9044649E-04  -.1165503E-03
  -.1907876E-03  -.1876792E-03  -.7422766E-04  -.5750900E-04  -.1308145E-03
  -.1861276E-03  -.1505344E-03  -.8243429E-04  -.5027597E-04  -.7381084E-04
  -.1040522E-03  -.1066741E-03  -.9607981E-04  -.1121596E-03  -.1629370E-03
  -.1598782E-03  -.1386119E-03  -.1402810E-03  -.1213493E-03  -.1113631E-03
  -.1541239E-03  -.1482597E-03  -.1083434E-03  -.1037741E-03  -.9610328E-04
  -.9845473E-04  -.9131503E-04  -.9904415E-04  -.8287639E-04  -.9946477E-04
  -.1864829E-03  -.1716876E-03  -.5650431E-04  -.1905149E-04  -.9600022E-04
  -.1458833E-03  -.1366495E-03  -.1237061E-03  -.1539006E-03  -.1415367E-03
  -.1197743E-03  -.1757640E-03  -.1686994E-03  -.1140104E-03  -.1420256E-03
  -.1727460E-03  -.1171360E-03  -.4550149E-04  -.4399783E-04  -.6152604E-04
  -.8518001E-04  -.1231364E-03  -.1046243E-03  -.9895224E-05   .3502165E-04
  -.2090061E-04  -.3618374E-04  -.3327131E-04  -.8375241E-04  -.1023627E-03
  -.1171063E-03  -.1480164E-03  -.1620363E-03  -.1455526E-03  -.1169170E-03
  -.1074346E-03  -.7171904E-04  -.2492047E-04  -.3443042E-04  -.9413366E-04
  -.9514873E-04  -.7032526E-04  -.9494677E-04  -.1757769E-03  -.2196077E-03
  -.1826410E-03  -.1220364E-03  -.7393363E-04  -.9180028E-04  -.1114307E-03
  -.1134838E-03  -.1461755E-03  -.1364743E-03  -.8994733E-04  -.6519478E-04
  -.4427279E-04  -.2577965E-04  -.2043228E-04  -.5088910E-04  -.1414602E-03
  -.1868220E-03  -.1521525E-03  -.8772084E-04  -.4239621E-04  -.6548808E-04
  -.1225335E-03  -.1209035E-03  -.9438842E-04  -.9842994E-04  -.8667333E-04
  -.1042118E-03  -.1363117E-03  -.1254447E-03  -.1131902E-03  -.9243866E-04
  -.5292336E-04  -.6167461E-04  -.1320605E-03  -.1849593E-03  -.1294976E-03
  -.4096104E-04  -.3182418E-04  -.4518153E-04  -.4616117E-04  -.1071141E-03
  -.1678518E-03  -.1207526E-03  -.7307455E-04  -.5741496E-04  -.6515106E-04
  -.8312228E-04  -.7871278E-04  -.5098406E-04  -.4668120E-04  -.4196023E-04
  -.2428719E-04  -.3225705E-04  -.1030757E-03  -.1323492E-03  -.6049889E-04
  -.4440260E-04  -.6480603E-04  -.8299094E-04  -.1207651E-03  -.1579131E-03
  -.1904811E-03  -.2068565E-03  -.2068979E-03  -.1838978E-03  -.1353829E-03
  -.1402093E-03  -.1598283E-03  -.1412324E-03  -.8458010E-04  -.4376780E-04
  -.7839462E-04  -.1072856E-03  -.7896212E-04  -.3695657E-04  -.4599783E-04
  -.8766420E-04  -.1196026E-03  -.8754809E-04   .7666250E-05   .4887237E-04
  -.3253240E-04  -.1285245E-03  -.1124016E-03  -.4813985E-04  -.6875928E-04
  -.1031504E-03  -.9918213E-04  -.9392367E-04  -.6511606E-04  -.5201887E-04
  -.7874354E-04  -.1155661E-03  -.1043995E-03  -.9055088E-04  -.1317028E-03
  -.1200638E-03  -.4635743E-04  -.3398469E-04  -.6347570E-04  -.5653025E-04
  -.4984588E-04  -.9479666E-04  -.1865906E-03  -.1890305E-03  -.8328251E-04
   .3169585E-04   .5306766E-04  -.2916300E-04  -.9342109E-04  -.9710092E-04
  -.1013036E-03  -.8649377E-04  -.4361672E-04  -.4953918E-04  -.1213051E-03
  -.1744854E-03  -.1275551E-03  -.6250659E-04  -.4731195E-04  -.4238356E-04
  -.6097513E-04  -.1044315E-03  -.1039400E-03  -.7366917E-04  -.6149084E-04
  -.8755310E-04  -.1396683E-03  -.1256547E-03  -.6182564E-04  -.3095831E-04
  -.6856906E-04  -.5357607E-04   .2711215E-05  -.3391536E-04  -.5183862E-04
  -.4766666E-06   .4506467E-05   .2454848E-05  -.1416810E-04  -.7111062E-04
  -.6799564E-04  -.4798499E-05   .2071128E-04  -.5545671E-04  -.1185536E-03
  -.1287164E-03  -.1203209E-03  -.9166859E-04  -.6760948E-04  -.6521310E-04
  -.8064232E-04  -.1057324E-03  -.9711373E-04  -.7040666E-04  -.6229542E-04
  -.8588299E-04  -.1468092E-03  -.1391572E-03  -.3031627E-04  -.9531294E-05
  -.9188107E-04  -.1245882E-03  -.1071659E-03  -.7990047E-04  -.7390485E-04
  -.9063472E-04  -.5446824E-04  -.1917247E-04  -.6545659E-04  -.1015776E-03
  -.7103546E-04  -.3468507E-04  -.6871178E-04  -.9663991E-04  -.7823875E-04
  -.5119145E-04  -.3058403E-04  -.3601736E-04  -.2015387E-04   .9287812E-05
  -.7143203E-04  -.1965144E-03  -.1537185E-03  -.4371291E-04  -.7441115E-04
  -.1192858E-03  -.6965087E-04   .1434137E-04  -.3018615E-04  -.1580867E-03
  -.1324325E-03  -.3114461E-04  -.1058081E-04  -.7552566E-04  -.1111327E-03
  -.1049660E-03  -.7119148E-04  -.2872593E-04  -.3390748E-04  -.7294882E-04
  -.1141676E-03  -.1232951E-03  -.8693312E-04  -.5555876E-04  -.4826585E-04
  -.1706622E-04   .3319564E-04   .2239855E-04  -.4343679E-04  -.8053620E-04
  -.6280698E-04  -.2565819E-04  -.4269079E-04  -.9746342E-04  -.9919769E-04
  -.6350524E-04  -.5266315E-04  -.5297088E-04  -.5073359E-04  -.1102456E-03
  -.1458799E-03  -.9662448E-04  -.4759471E-04  -.4994416E-04  -.6532912E-04
  -.6672925E-04  -.5924078E-04  -.6848517E-04  -.8460797E-04  -.5708465E-04
  -.1699208E-04  -.4398675E-05  -.8708198E-04  -.1580658E-03  -.1238684E-03
  -.5476719E-04  -.9230522E-04  -.1329323E-03  -.6539471E-04  -.3578115E-04
  -.1169522E-03  -.1555775E-03  -.8174598E-04  -.3031299E-04  -.1248967E-03
  -.1651709E-03  -.8044640E-04  -.7092790E-04  -.6978864E-04   .4270969E-04
   .7994889E-04  -.6058022E-04  -.1422114E-03  -.1183372E-03  -.8308373E-04
  -.3233404E-04   .1192019E-04   .7031999E-05  -.2732494E-04  -.4176804E-04
  -.6715127E-04  -.8721925E-04  -.9294889E-04  -.7610907E-04  -.4382025E-04
  -.2485814E-04  -.6843510E-04  -.1315059E-03  -.1611915E-03  -.1393881E-03
  -.1083393E-03  -.1141986E-03  -.1386371E-03  -.1010346E-03  -.4608317E-04
  -.2691277E-04  -.2821902E-04  -.5397391E-04  -.5258567E-04  -.7127668E-04
  -.9360990E-04  -.4933024E-04  -.2020999E-04  -.2327703E-04   .6216801E-05
  -.2385644E-05  -.4648349E-04  -.6534472E-04  -.3525494E-04   .1013244E-04
  -.1949365E-04  -.5430046E-04  -.7167572E-04  -.8622376E-04  -.1151982E-03
  -.1059405E-03  -.6498285E-04   .1185764E-04   .3683937E-04  -.2599983E-04
  -.1144622E-03  -.1332075E-03  -.3267009E-04   .1711714E-04  -.4204066E-04
  -.8970393E-04  -.5871589E-04  -.3098353E-04   .9167690E-05   .3727467E-04
   .4729697E-05  -.5641471E-04  -.6888676E-04  -.9045487E-04  -.9755153E-04
  -.8544397E-04  -.6212422E-04  -.5199954E-04  -.8266721E-04  -.1139644E-03
  -.1063646E-03  -.6434053E-04  -.3609666E-04  -.3973809E-04  -.3931951E-04
  -.1509087E-04  -.1715906E-04  -.5203790E-04  -.8487998E-04  -.8016522E-04
  -.7449240E-04  -.6094954E-04  -.6101496E-04  -.1032241E-03  -.9595127E-04
  -.3651554E-04   .4509324E-05  -.6020960E-05  -.7816443E-05   .1528085E-04
   .1678776E-04  -.1273157E-04  -.1897130E-04  -.3227590E-04  -.7276923E-04
  -.7459949E-04  -.3688482E-04   .7871119E-05   .9093475E-05  -.4407724E-04
  -.4382489E-04  -.4888540E-04  -.1212549E-03  -.8412589E-04  -.4284868E-05
  -.5575340E-04  -.8896748E-04  -.2775922E-04   .1773422E-04   .2326096E-04
  -.3335192E-04  -.7935382E-04  -.8564437E-04  -.5763070E-04  -.6119104E-04
  -.1239365E-03  -.8784293E-04  -.1641384E-04  -.6992535E-05  -.1184352E-04
  -.2198513E-04  -.3858974E-04  -.4262433E-04  -.5673336E-04  -.9435602E-04
  -.5026262E-04   .1882139E-04   .1192338E-04  -.1212931E-04  -.1863828E-04
   .3582452E-05   .1670145E-04  -.3576330E-05  -.2995293E-04  -.8503678E-04
  -.9745294E-04  -.7603763E-04  -.4925192E-04  -.3610772E-04  -.9942248E-05
   .5886366E-04   .3234350E-04  -.6964806E-04  -.8661189E-04  -.4901394E-04
  -.5289927E-04  -.7006584E-04  -.6665608E-04  -.2458916E-04  -.6861901E-05
  -.3896775E-04  -.7637987E-04  -.7372359E-04  -.6558008E-04  -.4513466E-04
   .5454872E-05   .1945042E-04  -.4017174E-04  -.7120379E-04  -.3580893E-04
   .7470677E-05   .3869009E-05  -.5513583E-05  -.1894241E-04  -.2577334E-04
  -.7337068E-05  -.8169901E-05  -.4256840E-04  -.6492783E-04  -.5486247E-04
  -.1023933E-03  -.1043465E-03  -.4202497E-04  -.1387537E-04  -.2018343E-04
   .9836604E-06   .2333177E-04  -.4067668E-05  -.3964682E-04  -.4223748E-04
  -.3178241E-04  -.2102349E-04  -.3159040E-06  -.1569683E-04  -.6508007E-04
  -.5791717E-04   .6812650E-05   .4567039E-04   .1976358E-04  -.4991976E-04
  -.5977683E-04  -.4260444E-05   .4394753E-05  -.2767925E-04  -.7640770E-04
  -.1638378E-03  -.1238123E-03   .5210933E-06   .5045169E-04   .7702537E-04
   .6331074E-04  -.3122268E-04  -.1452779E-03  -.1099369E-03  -.1763648E-05
  -.1664508E-04  -.1041336E-03  -.1390576E-03  -.7529197E-04  -.3100993E-04
  -.7038612E-04  -.4429274E-04   .2419592E-04   .2331859E-04   .8867955E-05
   .1637200E-04  -.1721064E-05  -.2242333E-04  -.3384818E-05  -.1044112E-04
  -.4878953E-04  -.2988820E-04   .4535221E-05   .1553586E-04  -.8010315E-05
  -.3102351E-04  -.4300574E-04  -.4186554E-04   .1260549E-04   .2626152E-04
  -.4461147E-04  -.1392879E-03  -.1091365E-03  -.3839390E-04  -.6516068E-04
  -.7755757E-04  -.3504444E-04  -.1003588E-04  -.2023141E-04  -.2126647E-04
   .5451126E-05   .3442846E-05  -.2323247E-04  -.3291857E-04  -.2531578E-04
  -.2187723E-04  -.7291295E-05   .4791427E-04   .6043843E-04   .3093099E-05
  -.4011397E-04  -.2567720E-04   .1295257E-04  -.1927772E-05  -.5844726E-04
  -.5095655E-04  -.7591330E-06  -.1029576E-04  -.1554627E-04  -.2535301E-04
  -.8968415E-04  -.1184813E-03  -.9307643E-04  -.5632341E-04   .1923842E-05
   .4889569E-04   .2517345E-04  -.6796351E-04  -.9157647E-04  -.7643662E-04
  -.9278404E-04  -.6986651E-04  -.1082408E-04   .2699339E-04   .7898283E-05
  -.2456622E-04  -.2811959E-04  -.1841583E-04  -.1602771E-04  -.1185245E-04
   .2112619E-04   .2310303E-04  -.5689603E-04  -.7105106E-04   .4573635E-05
   .2513148E-04  -.1267976E-04  -.4085961E-04  -.5322486E-04  -.4794236E-04
  -.4872086E-04  -.3029398E-04   .2384861E-04   .3809316E-04  -.1362346E-04
  -.2919250E-04  -.3232164E-04  -.3252422E-04  -.2066976E-04  -.1273421E-04
  -.2294559E-04  -.4994801E-04  -.4257576E-04  -.2425588E-04  -.3173283E-04
  -.8192620E-05  -.5869060E-06  -.3198012E-04  -.6847041E-05   .4028000E-04
   .2866117E-04   .2887460E-04   .5568941E-04   .6202162E-05  -.4431934E-04
  -.3232262E-04  -.6721155E-05  -.2512905E-04  -.7344030E-04  -.2976938E-04
   .5286498E-04   .6138207E-04   .6097532E-05  -.2914008E-04  -.1299351E-04
   .2296656E-04   .7320558E-05  -.5641782E-04  -.7353198E-04  -.8279617E-05
   .3129044E-04   .3710923E-04   .2555549E-04  -.2307861E-04  -.4455000E-04
  -.1125769E-04   .2665133E-04   .2614873E-04  -.8054049E-06  -.5167165E-04
  -.4140965E-04  -.2318760E-04  -.2384409E-04  -.1653257E-04  -.1892236E-04
  -.3415453E-04   .1986407E-05   .4637760E-04   .2263736E-04  -.1745259E-04
  -.3166021E-04  -.3408213E-04  -.8272686E-06   .1474232E-04  -.4066497E-05
  -.1902689E-04   .3355523E-05   .4787604E-04   .1895150E-04  -.4116838E-05
  -.1736346E-04  -.6834319E-04  -.6426423E-04  -.1303154E-04   .1367934E-04
   .3423341E-04   .3486413E-04  -.8511371E-05  -.1624728E-04  -.5601308E-04
  -.1641422E-03  -.1500234E-03  -.3993145E-04  -.6062422E-05  -.2494441E-04
  -.1024613E-05   .5277819E-04   .1854011E-04  -.2611159E-04   .1735843E-04
   .4897076E-04   .4608405E-05  -.3533603E-04  -.8032752E-04  -.4238900E-04
   .1698743E-04   .2207893E-04   .2230734E-04   .5003000E-05  -.3648126E-04
  -.3627900E-04  -.1426435E-04  -.2835425E-04  -.1349375E-04   .6460021E-04
   .9567243E-04   .5689723E-04   .2702902E-05   .1518605E-05   .5748557E-04
   .3617986E-04  -.1010217E-03  -.2120626E-03  -.1366846E-03   .2445276E-04
   .4062176E-04  -.6351380E-04  -.7554817E-04  -.1208562E-04  -.3675471E-04
  -.1202448E-03  -.1057549E-03  -.5113587E-04   .5957132E-05   .4336017E-04
   .7113348E-04   .4543952E-04   .5949415E-05   .2730925E-04   .5905961E-04
   .2280127E-04  -.3138926E-04   .3848558E-05   .6042365E-04   .4587327E-04
   .3472245E-04   .2875464E-04  -.2846880E-04  -.1509690E-04   .5019747E-04
   .4176934E-04   .6495503E-05   .9652252E-05  -.4684403E-05  -.3775817E-04
  -.6301841E-04  -.1475522E-04   .3852239E-04   .4820920E-04   .1948879E-04
   .4522643E-05   .1939869E-04   .1291248E-04   .5096857E-04   .6938349E-04
   .2422013E-05  -.3772154E-04   .6265845E-05   .8507017E-04   .9264580E-04
   .1520612E-04  -.3206027E-04   .3091897E-04   .6763444E-04   .5321724E-04
   .5127351E-04   .5417055E-04   .2506789E-04  -.4403230E-05  -.1517185E-04
  -.3720644E-04  -.7147009E-04  -.8160670E-04  -.1169346E-04   .3665225E-04
   .2501524E-04   .3326554E-04   .6381954E-04   .5671032E-04  -.1688438E-04
  -.6529466E-04  -.3104457E-04   .2158051E-04   .4728537E-04   .1869876E-04
  -.3349427E-04  -.2187546E-04   .3708647E-04   .3264441E-04  -.3540685E-04
  -.7457882E-04  -.5589115E-04  -.9754781E-05   .1412228E-04   .1742405E-04
   .4297443E-04   .6232021E-04   .3263847E-04   .6345732E-05   .2918658E-04
   .2479330E-04  -.2306998E-04  -.2962497E-04   .4299222E-05   .7086064E-05
  -.7454248E-05   .3238772E-04   .2524978E-04  -.2578864E-05   .3221362E-04
   .7601836E-04   .7162317E-04   .1555062E-04  -.2829365E-04   .1363520E-04
   .8509544E-04   .1070186E-03   .6718178E-04   .6671815E-04   .7705132E-04
   .3496444E-04   .3644786E-05   .1982660E-04  -.6549340E-05  -.4063849E-04
   .2902694E-05   .3774437E-04   .1023694E-04  -.5109235E-04  -.9765543E-04
  -.8369334E-04  -.4221188E-04   .5189554E-05   .4598016E-04   .3730529E-04
   .7102516E-05  -.1324597E-05   .3208638E-04   .1182157E-03   .9541265E-04
  -.6335380E-04  -.8582071E-04   .2244257E-04   .3370617E-04  -.9849574E-05
  -.1870139E-04  -.1104713E-04   .3045830E-04   .7629428E-04   .7264195E-04
   .3819417E-04   .1509350E-04  -.3534728E-04  -.3147684E-04   .3630959E-04
   .5820735E-04   .4648121E-04   .2281934E-04   .9677522E-05  -.2660325E-04
  -.1184749E-03  -.8580585E-04   .4365272E-04   .5947280E-04  -.7655074E-05
  -.1827192E-04  -.2070837E-04   .6122139E-05   .4136617E-04   .5471887E-04
   .3405212E-04   .8932647E-05  -.1551615E-05  -.3448700E-04  -.9225848E-04
  -.1039285E-03  -.4050281E-04   .5668290E-05   .3734741E-04   .3640549E-05
  -.1120750E-03  -.8718579E-04   .3094407E-04   .1604608E-05  -.4595614E-04
   .2028368E-05  -.4713050E-04  -.7021097E-04  -.1771038E-04  -.2320726E-04
  -.1628432E-04   .5091215E-04   .9831911E-04   .8138099E-04   .4313049E-04
   .3204639E-04   .1723360E-04   .2002837E-04   .7161194E-05  -.1525441E-05
   .2240240E-04   .5668804E-04   .5619936E-04   .5115680E-04   .2794583E-04
  -.3887656E-05   .4786520E-05  -.2755531E-04  -.4775263E-04   .2792505E-04
   .7458236E-04  -.1467118E-04  -.6639628E-04   .1283060E-04   .8213036E-04
   .1013946E-03   .5189184E-04  -.8935156E-05   .1555502E-04   .4906708E-04
   .2554689E-04  -.2602542E-04  -.4288113E-04   .6336231E-05   .5596628E-04
   .2444449E-04  -.6496771E-05   .1116679E-04   .3857794E-04   .6064687E-04
   .3804703E-04  -.1038316E-04  -.2704057E-04  -.4156646E-04  -.1870317E-04
   .2442742E-04   .3599243E-04   .3271131E-04   .6134475E-04   .7365609E-04
   .2816750E-04   .3085041E-04   .7426899E-04   .5152034E-04  -.2795130E-05
   .1044234E-04   .2850739E-05  -.7092166E-04  -.9124098E-04   .1520627E-04
   .1031436E-03   .6037125E-04  -.1096306E-04   .1723504E-04   .3984429E-04
  -.3360710E-04  -.5001730E-04   .6634425E-04   .1382991E-03   .8966208E-04
  -.8354491E-05  -.4678173E-04   .7541082E-05   .5603395E-04  -.1048865E-04
  -.6012945E-04  -.3549428E-04  -.5344271E-04  -.2848608E-04   .5596897E-04
   .7382810E-04   .2507509E-04  -.1769816E-04   .9155475E-05   .5108117E-04
  -.1619635E-04  -.7953656E-04  -.9773862E-05   .3883354E-04   .1975683E-04
  -.3846537E-04  -.7592688E-04   .1347809E-04   .5257741E-04  -.2973875E-05
  -.1033085E-04   .3050348E-04   .4703887E-04   .3554444E-04   .2056113E-04
  -.9276437E-06   .1790387E-04   .5802479E-04   .2802395E-04  -.3372088E-04
  -.1000216E-04   .1110339E-03   .1339064E-03   .7423416E-04   .2488384E-04
  -.3077466E-05   .9530007E-05   .3649280E-04   .2600657E-04  -.3905040E-04
  -.3640417E-04   .8099437E-04   .1371899E-03   .7122361E-04   .1549453E-04
   .5213151E-05  -.3044806E-04  -.5291216E-04  -.2381216E-04  -.1648148E-05
  -.5056778E-04  -.3774014E-04   .3309123E-04   .6859556E-04   .5752721E-04
  -.8721551E-05  -.7306413E-05   .5620264E-04   .5684741E-04   .4763076E-04
   .5965957E-04   .6890425E-04   .1357594E-04  -.4691053E-04   .2008178E-04
   .8852812E-04   .2771551E-04   .1909154E-04   .7292015E-04   .5958430E-04
   .3724897E-04   .1051222E-04  -.1254801E-04   .1127839E-04   .4478010E-04
   .4928145E-04   .3877773E-04   .4502798E-04   .7302103E-04   .5980479E-04
   .7861094E-05   .1387298E-04   .7188788E-04   .7733310E-04   .5027642E-04
   .6866590E-04   .1137720E-03   .1436220E-03   .1264408E-03   .9643247E-04
   .9259260E-04   .8440768E-04   .2939204E-04   .7557862E-05   .1437789E-04
  -.7962385E-05   .3019724E-04   .1033674E-03   .1042751E-03   .2833960E-04
   .1462698E-06   .2379288E-04   .1938166E-04   .1728702E-04   .2823696E-04
  -.2835905E-05  -.4052396E-04   .2637865E-04   .1062583E-03   .7677999E-04
  -.4204458E-06   .8358318E-05   .7447641E-04   .8226497E-04   .2499434E-04
  -.2785833E-04   .1987432E-04   .6413239E-04   .2626567E-04   .2645464E-06
   .1098835E-05   .4426748E-04   .8534139E-04   .3229971E-05  -.4484514E-04
  -.1552743E-04   .1425140E-04   .5947553E-04   .5260520E-04   .1475695E-05
   .4750589E-04   .1034490E-03   .7798151E-04   .1156458E-05   .1594094E-04
   .6615004E-04   .7075971E-04   .7260832E-04   .5486914E-04   .2151246E-04
   .4575527E-04   .6143371E-04   .2190254E-04   .1926296E-04   .8166409E-04
   .9686862E-04   .8932807E-05  -.2595683E-04  -.1528471E-04  -.1721413E-04
   .5383129E-05  -.1574210E-04   .1454178E-04   .4887487E-04   .2225552E-06
  -.9027814E-05   .3235585E-04   .2278957E-04   .1489624E-05   .4823887E-04
   .7215080E-04   .2586648E-04   .2193991E-04   .6705716E-04   .5394433E-04
   .8800371E-05  -.2838206E-04   .1065785E-04   .6983440E-04   .1666804E-04
  -.4279726E-04  -.3959598E-04  -.1010684E-04   .7710666E-04   .9057505E-04
  -.1048057E-04  -.5065385E-04   .2788600E-04   .8842584E-04   .2457744E-04
   .1590697E-05   .6226492E-04   .7136463E-04   .6456236E-04   .6496068E-04
   .4843034E-04   .1675414E-04   .3268524E-04   .7697255E-04   .4707037E-04
  -.6176974E-05   .2410225E-04   .8268294E-04   .6785164E-04   .5783756E-04
   .6650307E-04   .6773942E-04   .9175840E-04   .9966839E-04   .5620579E-04
   .4393547E-04   .3729604E-04   .4424198E-04   .8116513E-04   .8307855E-04
   .5471053E-04   .4370797E-04   .4356308E-04   .1482454E-04   .3765682E-05
   .4957011E-04   .6180210E-04   .8579668E-04   .1185657E-03   .3649076E-04
  -.2684263E-04   .4140370E-04   .9543262E-04   .6140329E-04   .9216001E-05
   .2072428E-04   .4958387E-04   .2427046E-04  -.4832829E-05   .2365282E-04
   .6997376E-04   .9790034E-04   .7058390E-04   .2680405E-04   .6862163E-04
   .1558971E-03   .1327452E-03   .2637427E-04   .3774346E-04   .6664144E-04
   .5875707E-04   .8323904E-04   .1197382E-03   .1163504E-03   .8210807E-04
   .7549142E-04   .8989574E-04   .1214508E-03   .1002033E-03   .5228233E-04
   .3781018E-04   .6165454E-04   .7274275E-04   .2431351E-04   .2208216E-04
   .4679429E-04   .7482365E-04   .7609037E-04   .5534203E-04   .3879621E-04
   .1905161E-04   .3777733E-04   .8575546E-04   .9522713E-04   .8655042E-04
   .6918459E-04   .5283920E-04   .4062971E-04   .2159230E-04   .1226985E-04
  -.1170934E-04   .1730068E-04   .8671995E-04   .9427086E-04   .5469387E-04
   .5054269E-04   .8387561E-04   .9452676E-04   .7034894E-04   .1487238E-04
   .3209893E-04   .8383029E-04   .1027425E-03   .6019176E-04  -.3320753E-04
  -.6969439E-04   .3276079E-05   .7254291E-04   .8058204E-04   .7469379E-04
   .4973327E-04   .7302878E-04   .8256237E-04   .1272665E-05  -.1387289E-04
   .2220377E-04   .1001868E-03   .1473077E-03   .1215693E-03   .5974613E-04
   .3350291E-05   .2817164E-06   .8215200E-04   .1473278E-03   .9126162E-04
   .5950206E-04   .9420137E-04   .9172301E-04   .5494133E-04   .5171725E-04
   .8564667E-04   .9337394E-04   .8868442E-04   .6321277E-04   .2158458E-04
   .2311418E-04   .6319104E-04   .9580649E-04   .9123633E-04   .6732863E-04
   .7894482E-05   .2768611E-05   .4965432E-04   .7028767E-04   .5799467E-04
   .5067331E-04   .4493460E-04   .2555665E-04   .2110098E-04   .2333907E-04
   .2779838E-04   .3348658E-04   .5839490E-04   .5890353E-04   .6050325E-04
   .3479082E-04   .2634498E-05   .3345312E-04   .9499278E-04   .8464945E-04
   .3175015E-04   .5896600E-04   .1156303E-03   .7097801E-04  -.5475807E-04
  -.6733803E-04   .3122081E-04   .9359840E-04   .1163043E-03   .1480029E-03
   .1299420E-03   .4686409E-04   .1677837E-04   .3366204E-04  -.2668195E-04
  -.1753866E-03  -.3726628E-03  -.6492276E-03  -.1064000E-02  -.1674855E-02
  -.2571804E-02  -.3611584E-02  -.4316359E-02  -.4357053E-02  -.3420578E-02
  -.1512110E-02   .5806557E-03   .1947821E-02   .2109030E-02   .1049701E-02
  -.7588125E-03  -.2162027E-02  -.1787460E-02   .7252355E-03   .4126471E-02
   .5896690E-02   .3780163E-02  -.1763257E-02  -.6918166E-02  -.8052654E-02
  -.5266673E-02  -.1457692E-02   .1062210E-02   .1977291E-02   .2137366E-02
   .2338430E-02   .2628239E-02   .2167228E-02   .3983432E-05  -.3643610E-02
  -.6759646E-02  -.6962585E-02  -.4126468E-02  -.9799193E-03  -.6184020E-03
  -.3248543E-02  -.6717298E-02  -.9106846E-02  -.8888871E-02  -.4937438E-02
   .1373131E-02   .5530187E-02   .4308777E-02   .1674504E-03  -.2589543E-02
  -.3772471E-02  -.5834388E-02  -.8440964E-02  -.8370115E-02  -.4121400E-02
   .2030871E-02   .7416427E-02   .1180267E-01   .1478592E-01   .1349014E-01
   .6857032E-02   .5576062E-03   .1955948E-02   .1024938E-01   .1734915E-01
   .1803210E-01   .1359465E-01   .6346841E-02  -.2664354E-02  -.9782742E-02
  -.9661799E-02  -.2789877E-02   .2861416E-02   .1427421E-02  -.3212661E-02
  -.3066870E-02   .2943350E-02   .7722686E-02   .5877567E-02   .8447462E-04
  -.4581468E-02  -.7877325E-02  -.1205785E-01  -.1585452E-01  -.1577998E-01
  -.1228843E-01  -.1014866E-01  -.1123675E-01  -.1192776E-01  -.9805818E-02
  -.8473689E-02  -.1176721E-01  -.1634551E-01  -.1502345E-01  -.5681306E-02
   .6743416E-02   .1516008E-01   .1537266E-01   .9105279E-02   .3307403E-02
   .4080638E-02   .1050360E-01   .1596564E-01   .1629631E-01   .1399263E-01
   .1265343E-01   .1064387E-01   .5727531E-02   .2736416E-02   .7513533E-02
   .1518632E-01   .1506813E-01   .6643671E-02   .2227909E-03   .1652069E-02
   .5839452E-02   .5805668E-02   .1497636E-03  -.9137012E-02  -.2061544E-01
  -.3183249E-01  -.3568702E-01  -.2428808E-01  -.1109383E-02   .1578038E-01
   .1364198E-01   .2357269E-02  -.1900640E-02  -.1493793E-02  -.8551643E-02
  -.2037802E-01  -.2348424E-01  -.1567806E-01  -.7093889E-02  -.3848048E-02
  -.5310176E-02  -.1225787E-01  -.2174117E-01  -.1861007E-01   .9115513E-02
   .4676162E-01   .6402169E-01   .5064839E-01   .2554407E-01   .1068210E-01
   .1087566E-01   .1966069E-01   .3065836E-01   .3827458E-01   .3571794E-01
   .2022056E-01  -.1096476E-02  -.1574043E-01  -.1695930E-01  -.9291639E-02
  -.2842775E-02  -.2469568E-02  -.4525548E-02  -.3447279E-02   .1540360E-02
   .6728051E-02   .8246964E-02   .4910668E-02  -.2786162E-02  -.1421221E-01
  -.2684014E-01  -.3561596E-01  -.3838621E-01  -.3922833E-01  -.4170080E-01
  -.4283478E-01  -.3721219E-01  -.2211885E-01   .1413404E-03   .1996757E-01
   .2507302E-01   .1409756E-01   .1626509E-02   .2969283E-02   .1597615E-01
   .2310404E-01   .1129259E-01  -.1390842E-01  -.3538469E-01  -.4144257E-01
  -.3134185E-01  -.1017628E-01   .1401150E-01   .3223128E-01   .3991130E-01
   .3983135E-01   .3799065E-01   .3755051E-01   .3682811E-01   .3191755E-01
   .2070085E-01   .4498476E-02  -.1313781E-01  -.2898333E-01  -.4073715E-01
  -.4491890E-01  -.3723640E-01  -.1952707E-01  -.4349681E-02  -.4650035E-02
  -.1685302E-01  -.2270741E-01  -.1238337E-01   .3095146E-02   .9401266E-02
   .8544862E-02   .1002204E-01   .1128228E-01   .1645045E-02  -.1884691E-01
  -.3715632E-01  -.4191889E-01  -.3165297E-01  -.1166602E-01   .8416062E-02
   .1818320E-01   .1638875E-01   .1405411E-01   .2029469E-01   .3042120E-01
   .3421480E-01   .2929806E-01   .2002913E-01   .9607275E-02  -.7339643E-03
  -.9538495E-02  -.1654420E-01  -.2347368E-01  -.2921090E-01  -.2540752E-01
  -.3461037E-02   .3051928E-01   .5382097E-01   .4860335E-01   .2390690E-01
   .6188947E-02   .7733190E-02   .1496230E-01   .9617630E-02  -.9475877E-02
  -.2962709E-01  -.4024509E-01  -.3964769E-01  -.3175317E-01  -.2238526E-01
  -.1671299E-01  -.1516392E-01  -.1263955E-01  -.4459708E-02   .7432176E-02
   .1615224E-01   .1879997E-01   .2059471E-01   .2611133E-01   .3086738E-01
   .2834965E-01   .2063789E-01   .1346810E-01   .5220131E-02  -.7866970E-02
  -.1879989E-01  -.1504243E-01   .2294918E-02   .1626739E-01   .1524141E-01
   .6551504E-02   .4378691E-02   .1273941E-01   .2569754E-01   .3533258E-01
   .3495461E-01   .2229868E-01   .3427906E-02  -.1103888E-01  -.1700969E-01
  -.1968951E-01  -.2444302E-01  -.3153591E-01  -.3905144E-01  -.4162301E-01
  -.2979427E-01  -.4481772E-02   .1458050E-01   .1073903E-01  -.6964660E-02
  -.1748450E-01  -.1432704E-01  -.5678522E-02   .3234811E-04  -.1771582E-02
  -.1148549E-01  -.2200104E-01  -.2436534E-01  -.1758203E-01  -.5223502E-02
   .1131509E-01   .2719226E-01   .3194855E-01   .2451364E-01   .1944621E-01
   .2587464E-01   .3095087E-01   .1938726E-01   .2004054E-03  -.4080186E-02
   .1051980E-01   .2465777E-01   .2124817E-01   .2901896E-02  -.1576388E-01
  -.2146294E-01  -.7852233E-02   .2000457E-01   .4361377E-01   .4367202E-01
   .2038270E-01  -.5279459E-02  -.1435449E-01  -.8644861E-02  -.4173848E-02
  -.1204657E-01  -.2900535E-01  -.4179664E-01  -.3875272E-01  -.2168791E-01
  -.5959940E-02  -.3508112E-02  -.9479411E-02  -.1291624E-01  -.1277799E-01
  -.1278467E-01  -.9592019E-02   .7145213E-03   .1119118E-01   .1230518E-01
   .6111791E-02   .1940691E-02   .2193038E-02   .8652259E-03  -.5308951E-02
  -.1011574E-01  -.4785053E-02   .9601238E-02   .1972293E-01   .1353875E-01
  -.4283049E-02  -.1508229E-01  -.6084656E-02   .1573089E-01   .3213310E-01
   .3365383E-01   .2705184E-01   .2328652E-01   .2254066E-01   .1595165E-01
  -.6613259E-04  -.1898565E-01  -.3292065E-01  -.3950739E-01  -.3921201E-01
  -.3198319E-01  -.1999578E-01  -.9884165E-02  -.7460427E-02  -.1058518E-01
  -.1104151E-01  -.3769104E-02   .7871318E-02   .1478407E-01   .8904691E-02
  -.1019120E-01  -.3279988E-01  -.4422360E-01  -.3655610E-01  -.1752594E-01
  -.3919554E-02  -.2774002E-02  -.5097043E-02  -.1779261E-02   .4136076E-02
   .7012461E-02   .9551561E-02   .1573365E-01   .2133104E-01   .1980136E-01
   .1285601E-01   .9244268E-02   .1311776E-01   .1876851E-01   .1926858E-01
   .1528446E-01   .1097048E-01   .6159117E-02   .3239836E-03  -.8381316E-03
   .6377143E-02   .1357990E-01   .1086644E-01   .2274907E-02  -.3048538E-02
  -.6681903E-02  -.1193518E-01  -.9502661E-02   .8512970E-02   .2925028E-01
   .3299934E-01   .2132314E-01   .1550688E-01   .2833420E-01   .4761456E-01
   .5074091E-01   .3364925E-01   .1812166E-01   .2240941E-01   .3300699E-01
   .2240637E-01  -.8842041E-02  -.3046455E-01  -.2497581E-01  -.8668164E-02
  -.2809342E-02  -.4069595E-02   .3877256E-02   .2182555E-01   .3373751E-01
   .2984663E-01   .1751512E-01   .8054323E-02   .3021616E-02  -.2017000E-02
  -.7964338E-02  -.1232476E-01  -.1460994E-01  -.1612460E-01  -.1692914E-01
  -.1651745E-01  -.1452154E-01  -.9655435E-02  -.1043608E-02   .8698826E-02
   .1316193E-01   .4994617E-02  -.1748860E-01  -.4318275E-01  -.5519983E-01
  -.5072717E-01  -.4340391E-01  -.3983716E-01  -.2861397E-01  -.3138896E-02
   .1988297E-01   .2265009E-01   .1587323E-01   .2348096E-01   .4329499E-01
   .4866910E-01   .2907817E-01   .4727489E-02  -.3480127E-02   .1109105E-02
   .2035136E-02  -.9072883E-02  -.2881415E-01  -.4687867E-01  -.4942440E-01
  -.2977820E-01  -.1656659E-02   .1179097E-01   .7420268E-02   .5939988E-02
   .2152730E-01   .4195402E-01   .4482498E-01   .2349468E-01  -.7767027E-02
  -.2778388E-01  -.2530142E-01  -.7846913E-02   .2588725E-02  -.1118559E-01
  -.3971938E-01  -.5148300E-01  -.2934851E-01   .4678885E-02   .1471614E-01
  -.2730741E-02  -.1510426E-01   .1009167E-02   .2938301E-01   .3832803E-01
   .2221454E-01   .4000953E-02   .1754979E-02   .8152279E-02   .5232040E-02
  -.1138356E-01  -.2849437E-01  -.3165575E-01  -.2127561E-01  -.1153679E-01
  -.1340628E-01  -.2120307E-01  -.1955802E-01  -.2298022E-02   .2099363E-01
   .3670844E-01   .3908016E-01   .2869841E-01   .8597465E-02  -.1271581E-01
  -.2303685E-01  -.1933964E-01  -.1213831E-01  -.1034780E-01  -.1009371E-01
  -.5008013E-02   .2643348E-02   .9151694E-02   .1699764E-01   .2658036E-01
   .3076364E-01   .2641942E-01   .1994416E-01   .1465028E-01   .5484264E-02
  -.8114405E-02  -.1687913E-01  -.1425522E-01  -.4136300E-02   .7281801E-02
   .1770808E-01   .2433882E-01   .2341505E-01   .1768249E-01   .1534849E-01
   .1799496E-01   .1768390E-01   .9993263E-02   .1514818E-02  -.3088829E-02
  -.1223426E-01  -.3296473E-01  -.5384569E-01  -.5843082E-01  -.4923016E-01
  -.4060985E-01  -.3307197E-01  -.1531184E-01   .1023459E-01   .2528413E-01
   .2094191E-01   .7579859E-02  -.3504438E-02  -.1392190E-01  -.2721451E-01
  -.3466089E-01  -.2334613E-01   .3872889E-02   .2582311E-01   .2394377E-01
   .1723554E-02  -.1989738E-01  -.2502254E-01  -.1674951E-01  -.6836323E-02
   .2094628E-02   .1429610E-01   .2460095E-01   .2049775E-01   .4374302E-02
  -.4915118E-02  -.7413859E-03   .9913927E-04  -.1435300E-01  -.2964497E-01
  -.2581846E-01  -.7690423E-02   .7219309E-03  -.1337673E-01  -.3839063E-01
  -.5431715E-01  -.5234276E-01  -.3634029E-01  -.1376729E-01   .7103358E-02
   .1670199E-01   .1154069E-01   .8153657E-03  -.2622984E-02   .3737017E-02
   .1366484E-01   .2259335E-01   .2689335E-01   .1922412E-01  -.2628196E-02
  -.2554394E-01  -.3172036E-01  -.1822791E-01   .2239517E-02   .1763732E-01
   .2601510E-01   .3002235E-01   .3115766E-01   .3101303E-01   .3137748E-01
   .3028186E-01   .2426962E-01   .1687634E-01   .1731850E-01   .2663230E-01
   .3264951E-01   .2397916E-01   .5187993E-02  -.6800556E-02  -.9206998E-03
   .1697727E-01   .3174907E-01   .3480714E-01   .2978827E-01   .2418053E-01
   .1927638E-01   .1003852E-01  -.6030249E-02  -.2153597E-01  -.2380098E-01
  -.8449797E-02   .1402064E-01   .2760850E-01   .2470518E-01   .9869682E-02
  -.5732535E-02  -.1122508E-01  -.1925525E-02   .1641068E-01   .3088753E-01
   .3356846E-01   .2753373E-01   .1938441E-01   .1202477E-01   .7049697E-02
   .6959628E-02   .1132236E-01   .1501928E-01   .1319734E-01   .6064716E-02
  -.1792329E-02  -.5618400E-02  -.5158973E-02  -.5650635E-02  -.1114152E-01
  -.1851151E-01  -.2179733E-01  -.2079189E-01  -.2135644E-01  -.2790587E-01
  -.3776650E-01  -.4225392E-01  -.3481799E-01  -.1972250E-01  -.8471698E-02
  -.5455205E-02  -.3544813E-02   .3196796E-02   .9211550E-02   .6016217E-02
  -.4145953E-02  -.1076358E-01  -.7985209E-02   .7224054E-03   .8559403E-02
   .1072862E-01   .5417356E-02  -.5974090E-02  -.1883339E-01  -.2678160E-01
  -.2488100E-01  -.1259529E-01   .7206980E-02   .3007262E-01   .4815388E-01
   .5142930E-01   .3752104E-01   .1703281E-01   .2985610E-02  -.1378065E-02
   .9763232E-03   .9786159E-02   .2567938E-01   .4425109E-01   .5729924E-01
   .5790404E-01   .4384044E-01   .1906918E-01  -.7880707E-02  -.2847599E-01
  -.3743568E-01  -.3486551E-01  -.2809278E-01  -.2721214E-01  -.3564972E-01
  -.4740725E-01  -.5350277E-01  -.4813929E-01  -.3193162E-01  -.1484181E-01
  -.1024915E-01  -.1942028E-01  -.2920375E-01  -.3193205E-01  -.3704089E-01
  -.5244450E-01  -.6794227E-01  -.6976184E-01  -.5965161E-01  -.4916456E-01
  -.4572033E-01  -.5062087E-01  -.5966102E-01  -.6241213E-01  -.5015013E-01
  -.2618149E-01  -.2082426E-02   .1661623E-01   .3469306E-01   .5600251E-01
   .7478497E-01   .8291929E-01   .8123849E-01   .7751341E-01   .7593834E-01
   .7465886E-01   .7113051E-01   .6331258E-01   .4876178E-01   .2881749E-01
   .1017231E-01  -.3064451E-02  -.1538275E-01  -.3185351E-01  -.4622007E-01
  -.4567550E-01  -.2914562E-01  -.1158788E-01  -.6311128E-02  -.1177912E-01
  -.1817458E-01  -.1760924E-01  -.6798126E-02   .1096500E-01   .2529974E-01
   .2546285E-01   .9864249E-02  -.1304719E-01  -.3392855E-01  -.5029544E-01
  -.6480255E-01  -.7727128E-01  -.8100121E-01  -.7043415E-01  -.5124534E-01
  -.3621353E-01  -.2863983E-01  -.1774470E-01   .3221271E-02   .2342031E-01
   .2927518E-01   .2578931E-01   .2893367E-01   .4131898E-01   .5071038E-01
   .5001197E-01   .4488312E-01   .4128717E-01   .3842976E-01   .3647631E-01
   .3983266E-01   .4752707E-01   .4937536E-01   .3863038E-01   .2096141E-01
   .4614411E-02  -.9960225E-02  -.2315838E-01  -.2904038E-01  -.2539566E-01
  -.2089432E-01  -.2220792E-01  -.2453120E-01  -.2236726E-01  -.1855277E-01
  -.1627416E-01  -.1412945E-01  -.1350137E-01  -.1852980E-01  -.2638992E-01
  -.2915057E-01  -.2694708E-01  -.2903146E-01  -.4101783E-01  -.5919413E-01
  -.7724093E-01  -.9305032E-01  -.1080977E+00  -.1223621E+00  -.1303553E+00
  -.1239451E+00  -.1022068E+00  -.7513366E-01  -.5341151E-01  -.3713633E-01
  -.1812810E-01   .8840490E-02   .4016727E-01   .6552970E-01   .7460907E-01
   .6669725E-01   .5358049E-01   .4695095E-01   .4504469E-01   .3808861E-01
   .2178395E-01  -.1976044E-02  -.3035456E-01  -.5645587E-01  -.6781447E-01
  -.5749450E-01  -.3368210E-01  -.1145380E-01   .3212256E-02   .1687000E-01
   .3838394E-01   .7054207E-01   .1090796E+00   .1433660E+00   .1613088E+00
   .1604234E+00   .1519115E+00   .1485534E+00   .1526019E+00   .1563730E+00
   .1478609E+00   .1192839E+00   .7762422E-01   .4090872E-01   .1707816E-01
  -.3224941E-02  -.2647738E-01  -.4269251E-01  -.3990149E-01  -.2320510E-01
  -.1209741E-01  -.2103466E-01  -.4570144E-01  -.6891134E-01  -.7886064E-01
  -.7919029E-01  -.8205924E-01  -.9426434E-01  -.1097591E+00  -.1143636E+00
  -.1002863E+00  -.7730586E-01  -.6584621E-01  -.7514366E-01  -.9083877E-01
  -.8905605E-01  -.6079699E-01  -.1853618E-01   .1662709E-01   .2836930E-01
   .1333231E-01  -.1533273E-01  -.3747898E-01  -.4453935E-01  -.4439837E-01
  -.4549261E-01  -.4478881E-01  -.3670257E-01  -.2458947E-01  -.1487332E-01
  -.6786844E-02   .3616562E-02   .1475370E-01   .2291504E-01   .3089656E-01
   .4547702E-01   .6781288E-01   .9037983E-01   .1023120E+00   .9758670E-01
   .8033800E-01   .6173098E-01   .4938381E-01   .3992560E-01   .2343123E-01
  -.5965397E-02  -.4333782E-01  -.7631368E-01  -.9646022E-01  -.1056322E+00
  -.1096432E+00  -.1111710E+00  -.1120403E+00  -.1155944E+00  -.1222688E+00
  -.1269098E+00  -.1234290E+00  -.1102079E+00  -.9152374E-01  -.7470089E-01
  -.6379131E-01  -.5501623E-01  -.4052109E-01  -.1796033E-01   .6755399E-02
   .2743110E-01   .4584749E-01   .6943012E-01   .1027511E+00   .1426403E+00
   .1777452E+00   .1926434E+00   .1805704E+00   .1551287E+00   .1399236E+00
   .1407037E+00   .1388951E+00   .1213191E+00   .1034089E+00   .1081325E+00
   .1324126E+00   .1529520E+00   .1578369E+00   .1526363E+00   .1407038E+00
   .1188950E+00   .9166758E-01   .6901549E-01   .4886263E-01   .2152085E-01
  -.6019219E-02  -.1430045E-01  -.4972382E-02  -.4444455E-02  -.2564629E-01
  -.4977883E-01  -.5663524E-01  -.5141586E-01  -.4792298E-01  -.4429559E-01
  -.3376567E-01  -.2522956E-01  -.3210316E-01  -.4951869E-01  -.6161715E-01
  -.6522931E-01  -.6930298E-01  -.7516019E-01  -.7357422E-01  -.6194005E-01
  -.5013271E-01  -.4618865E-01  -.4766965E-01  -.5150966E-01  -.6125065E-01
  -.7874723E-01  -.9698737E-01  -.1064983E+00  -.1038113E+00  -.9159507E-01
  -.7427196E-01  -.5402056E-01  -.3132250E-01  -.1000086E-01   .3920447E-02
   .1045437E-01   .1552163E-01   .2034755E-01   .1779928E-01   .3719164E-02
  -.1205819E-01  -.1221453E-01   .8222620E-02   .3165509E-01   .3152629E-01
  -.3522429E-02  -.5736897E-01  -.9564110E-01  -.9205720E-01  -.5260416E-01
  -.1055002E-01   .5913620E-02  -.3793618E-02  -.2189958E-01  -.3459076E-01
  -.4102328E-01  -.4595263E-01  -.5133473E-01  -.5654780E-01  -.6121900E-01
  -.6307840E-01  -.5715661E-01  -.4397128E-01  -.3528634E-01  -.4365033E-01
  -.6638445E-01  -.8713801E-01  -.9358584E-01  -.8819800E-01  -.8066768E-01
  -.7549197E-01  -.7038308E-01  -.6325753E-01  -.5527956E-01  -.4727822E-01
  -.3773862E-01  -.2638278E-01  -.1663268E-01  -.1209790E-01  -.1314139E-01
  -.1764288E-01  -.2384821E-01  -.3103052E-01  -.3890155E-01  -.4727066E-01
  -.5654128E-01  -.6866202E-01  -.8507540E-01  -.1034446E+00  -.1193389E+00
  -.1305531E+00  -.1374730E+00  -.1405491E+00  -.1398082E+00  -.1367436E+00
  -.1341350E+00  -.1329662E+00  -.1299932E+00  -.1192644E+00  -.9691000E-01
  -.6436062E-01  -.2619262E-01   .1468518E-01   .5574338E-01   .8756855E-01
   .9504544E-01   .7111432E-01   .2641460E-01  -.1846753E-01  -.4789672E-01
  -.5757683E-01  -.5181098E-01  -.3789674E-01  -.2331866E-01  -.1656409E-01
  -.2357998E-01  -.3893063E-01  -.4758075E-01  -.4122921E-01  -.2648975E-01
  -.1350601E-01  -.4396832E-02   .3500109E-02   .1089374E-01   .1746448E-01
   .2438444E-01   .3361795E-01   .4711103E-01   .6576201E-01   .8681964E-01
   .1041248E+00   .1134438E+00   .1166963E+00   .1185967E+00   .1205130E+00
   .1193336E+00   .1114167E+00   .9639548E-01   .7734060E-01   .5756107E-01
   .3819350E-01   .2004624E-01   .5532342E-02  -.3243523E-02  -.5499246E-02
  -.1391801E-05   .1434057E-01   .3474483E-01   .5512753E-01   .7162127E-01
   .8484101E-01   .9669205E-01   .1077120E+00   .1183278E+00   .1298853E+00
   .1428323E+00   .1555505E+00   .1657304E+00   .1710098E+00   .1684377E+00
   .1563747E+00   .1386826E+00   .1234547E+00   .1146783E+00   .1075812E+00
   .9449574E-01   .7300351E-01   .4652632E-01   .2041044E-01   .3037343E-03
  -.9010038E-02  -.7069192E-02   .2116848E-02   .1586470E-01   .3649729E-01
   .6630561E-01   .1003821E+00   .1276708E+00   .1392939E+00   .1349725E+00
   .1223104E+00   .1112505E+00   .1089421E+00   .1175433E+00   .1343435E+00
   .1517615E+00   .1587896E+00   .1495492E+00   .1310534E+00   .1165121E+00
   .1100745E+00   .1040924E+00   .9122881E-01   .7199148E-01   .4965485E-01
   .2544508E-01   .1673586E-02  -.1526986E-01  -.1904495E-01  -.1038013E-01
   .9244327E-03   .7105578E-03  -.2045141E-01  -.5972587E-01  -.1034634E+00
  -.1363860E+00  -.1497734E+00  -.1452218E+00  -.1338690E+00  -.1263331E+00
  -.1215371E+00  -.1126439E+00  -.1033115E+00  -.1058049E+00  -.1211830E+00
  -.1333059E+00  -.1285878E+00  -.1112899E+00  -.9265028E-01  -.7627594E-01
  -.6288761E-01  -.5840758E-01  -.6555760E-01  -.7477207E-01  -.7350126E-01
  -.6016606E-01  -.4299833E-01  -.2996206E-01  -.2344216E-01  -.2107477E-01
  -.1893217E-01  -.1391145E-01  -.3920683E-02   .1225902E-01   .3366823E-01
   .5552370E-01   .6969316E-01   .6869702E-01   .5041574E-01   .1933544E-01
  -.1686712E-01  -.5173635E-01  -.8060669E-01  -.1002035E+00  -.1100349E+00
  -.1127666E+00  -.1116878E+00  -.1079796E+00  -.1021598E+00  -.9703117E-01
  -.9606853E-01  -.9965615E-01  -.1051018E+00  -.1091246E+00  -.1092797E+00
  -.1052804E+00  -.9993856E-01  -.9691326E-01  -.9758416E-01  -.1015719E+00
  -.1079122E+00  -.1142390E+00  -.1181863E+00  -.1208994E+00  -.1254515E+00
  -.1324524E+00  -.1407262E+00  -.1502758E+00  -.1592766E+00  -.1595156E+00
  -.1406798E+00  -.1007202E+00  -.5144385E-01  -.1240922E-01   .3095149E-02
  -.2627550E-02  -.1662087E-01  -.2761095E-01  -.3060303E-01  -.2356097E-01
  -.7311455E-02   .1221327E-01   .2860368E-01   .4104047E-01   .5123204E-01
   .5715648E-01   .5611156E-01   .5165351E-01   .5019584E-01   .5310401E-01
   .5854692E-01   .6796000E-01   .8401457E-01   .1054181E+00   .1297282E+00
   .1581105E+00   .1915702E+00   .2252858E+00   .2518143E+00   .2679156E+00
   .2745371E+00   .2729527E+00   .2648294E+00   .2541364E+00   .2458269E+00
   .2428620E+00   .2455771E+00   .2522855E+00   .2593467E+00   .2625652E+00
   .2593952E+00   .2493468E+00   .2337758E+00   .2158143E+00   .1987849E+00
   .1834610E+00   .1672929E+00   .1458949E+00   .1148183E+00   .7182634E-01
   .1881365E-01  -.3976849E-01  -.9940680E-01  -.1539015E+00  -.1939105E+00
  -.2120103E+00  -.2091265E+00  -.1946880E+00  -.1805851E+00  -.1739370E+00
  -.1738331E+00  -.1736577E+00  -.1675727E+00  -.1562132E+00  -.1467853E+00
  -.1467145E+00  -.1561198E+00  -.1678164E+00  -.1755071E+00  -.1784137E+00
  -.1760348E+00  -.1627851E+00  -.1336059E+00  -.9552370E-01  -.6717060E-01
  -.6224644E-01  -.7823475E-01  -.1040861E+00  -.1300682E+00  -.1446471E+00
  -.1341568E+00  -.9720628E-01  -.5216652E-01  -.1935588E-01  -.9151093E-03
   .1425017E-01   .3271108E-01   .5255605E-01   .7229953E-01   .9433537E-01
   .1204015E+00   .1483157E+00   .1735869E+00   .1935000E+00   .2088621E+00
   .2198627E+00   .2215652E+00   .2080367E+00   .1813779E+00   .1513786E+00
   .1254143E+00   .1060445E+00   .9717737E-01   .1026994E+00   .1173981E+00
   .1274180E+00   .1219302E+00   .9982018E-01   .6621350E-01   .2929358E-01
  -.1067003E-02  -.1918763E-01  -.2743652E-01  -.3123855E-01  -.3343405E-01
  -.3596168E-01  -.4299022E-01  -.5833046E-01  -.8050369E-01  -.1025050E+00
  -.1176744E+00  -.1261434E+00  -.1340639E+00  -.1458683E+00  -.1596812E+00
  -.1697446E+00  -.1701507E+00  -.1577585E+00  -.1366413E+00  -.1192987E+00
  -.1175900E+00  -.1295247E+00  -.1397941E+00  -.1371583E+00  -.1263907E+00
  -.1206752E+00  -.1283718E+00  -.1488975E+00  -.1738640E+00  -.1900135E+00
  -.1881705E+00  -.1699743E+00  -.1435153E+00  -.1169293E+00  -.9881397E-01
  -.9655343E-01  -.1078625E+00  -.1179985E+00  -.1109994E+00  -.8458394E-01
  -.5155246E-01  -.2670907E-01  -.1519716E-01  -.1367545E-01  -.1750543E-01
  -.2277936E-01  -.2353752E-01  -.1310656E-01   .1015536E-01   .4019792E-01
   .6687596E-01   .8217745E-01   .8311999E-01   .7065839E-01   .4728280E-01
   .1648111E-01  -.1567260E-01  -.4004034E-01  -.4904872E-01  -.4390154E-01
  -.3518550E-01  -.3381773E-01  -.4087241E-01  -.4816000E-01  -.5015748E-01
  -.5205472E-01  -.6243951E-01  -.7933708E-01  -.9033069E-01  -.8797664E-01
  -.7875783E-01  -.7328482E-01  -.7316553E-01  -.7276873E-01  -.6871041E-01
  -.6086412E-01  -.4713344E-01  -.2444765E-01   .5098718E-02   .3443582E-01
   .5970665E-01   .8501937E-01   .1169553E+00   .1563083E+00   .1971210E+00
   .2315700E+00   .2539392E+00   .2628773E+00   .2637482E+00   .2683631E+00
   .2874327E+00   .3194641E+00   .3506579E+00   .3684969E+00   .3723846E+00
   .3693335E+00   .3647131E+00   .3607306E+00   .3585524E+00   .3579992E+00
   .3581692E+00   .3596722E+00   .3632962E+00   .3650093E+00   .3550668E+00
   .3276589E+00   .2927586E+00   .2734061E+00   .2852255E+00   .3201269E+00
   .3559593E+00   .3797370E+00   .3947197E+00   .4072377E+00   .4158257E+00
   .4138580E+00   .3953901E+00   .3600240E+00   .3177441E+00   .2849293E+00
   .2695293E+00   .2635227E+00   .2547412E+00   .2410071E+00   .2281893E+00
   .2208797E+00   .2205374E+00   .2271249E+00   .2373731E+00   .2454229E+00
   .2488441E+00   .2504669E+00   .2523484E+00   .2521534E+00   .2480726E+00
   .2427350E+00   .2389836E+00   .2353336E+00   .2286473E+00   .2184116E+00
   .2040495E+00   .1800806E+00   .1396862E+00   .8243743E-01   .1577290E-01
  -.4854784E-01  -.9741750E-01  -.1225410E+00  -.1283004E+00  -.1283388E+00
  -.1314291E+00  -.1352163E+00  -.1356332E+00  -.1355962E+00  -.1410433E+00
  -.1522601E+00  -.1612401E+00  -.1569113E+00  -.1351215E+00  -.1047717E+00
  -.8121677E-01  -.7255017E-01  -.7379329E-01  -.7452029E-01  -.7054459E-01
  -.6671686E-01  -.6934414E-01  -.7797816E-01  -.8629746E-01  -.9034808E-01
  -.9245496E-01  -.9612466E-01  -.1011743E+00  -.1068448E+00  -.1149148E+00
  -.1248103E+00  -.1293255E+00  -.1206504E+00  -.1006185E+00  -.8042112E-01
  -.6830777E-01  -.6200634E-01  -.5548379E-01  -.4778141E-01  -.4077165E-01
  -.3271156E-01  -.1931248E-01  -.1428740E-04   .1988291E-01   .3388418E-01
   .4044770E-01   .4417994E-01   .5086640E-01   .6173866E-01   .7415468E-01
   .8686463E-01   .1011558E+00   .1161856E+00   .1268442E+00   .1288274E+00
   .1234596E+00   .1146655E+00   .1030684E+00   .8603110E-01   .6300414E-01
   .3763127E-01   .1454716E-01  -.2448574E-02  -.8903468E-02  -.2259790E-02
   .1151130E-01   .2035742E-01   .1997988E-01   .1778452E-01   .1719739E-01
   .9098322E-02  -.1219241E-01  -.3452103E-01  -.4089320E-01  -.3123293E-01
  -.2099550E-01  -.2118496E-01  -.2853753E-01  -.3344833E-01  -.2992083E-01
  -.1847863E-01  -.4669850E-02   .3035458E-02  -.2718503E-02  -.2179638E-01
  -.4527119E-01  -.6335742E-01  -.7313666E-01  -.7695354E-01  -.7768943E-01
  -.7796145E-01  -.7996266E-01  -.8360103E-01  -.8743705E-01  -.9044389E-01
  -.9012863E-01  -.8343915E-01  -.7485172E-01  -.7804785E-01  -.1020275E+00
  -.1398209E+00  -.1764657E+00  -.2022498E+00  -.2136643E+00  -.2104419E+00
  -.1986652E+00  -.1896414E+00  -.1892866E+00  -.1931132E+00  -.1950459E+00
  -.1969694E+00  -.2063703E+00  -.2268916E+00  -.2539337E+00  -.2783751E+00
  -.2928052E+00  -.2945632E+00  -.2844366E+00  -.2640073E+00  -.2358522E+00
  -.2069076E+00  -.1872856E+00  -.1825827E+00  -.1892145E+00  -.1964366E+00
  -.1908214E+00  -.1627244E+00  -.1147243E+00  -.6303739E-01  -.2644755E-01
  -.1352392E-01  -.2064714E-01  -.3863346E-01  -.5913051E-01  -.7696468E-01
  -.8881483E-01  -.9092208E-01  -.8041862E-01  -.6054412E-01  -.4104532E-01
  -.3052536E-01  -.3037906E-01  -.3683467E-01  -.4526131E-01  -.5151921E-01
  -.5191811E-01  -.4379346E-01  -.2592616E-01   .9487381E-03   .3170760E-01
   .5652348E-01   .6609630E-01   .5798280E-01   .3725734E-01   .1085034E-01
  -.1690268E-01  -.4217796E-01  -.5814352E-01  -.5875816E-01  -.4784308E-01
  -.3892885E-01  -.4064182E-01  -.4679963E-01  -.4511191E-01  -.3210784E-01
  -.1498395E-01  -.1692309E-02   .5736147E-02   .9231882E-02   .1119412E-01
   .1443748E-01   .2166147E-01   .3250369E-01   .4342312E-01   .5197072E-01
   .5923850E-01   .6648671E-01   .7077317E-01   .6620658E-01   .5016719E-01
   .2758155E-01   .7757565E-02  -.1667690E-02   .2588235E-02   .1860494E-01
   .4127667E-01   .6790637E-01   .9887336E-01   .1308962E+00   .1559156E+00
   .1699120E+00   .1763172E+00   .1786801E+00   .1761642E+00   .1681294E+00
   .1577375E+00   .1492246E+00   .1450728E+00   .1453909E+00   .1467599E+00
   .1425548E+00   .1274360E+00   .1016620E+00   .7087428E-01   .4225774E-01
   .2034913E-01   .5918752E-02  -.9239891E-03   .2068450E-02   .1579651E-01
   .3339400E-01   .4265812E-01   .3707164E-01   .2151114E-01   .6997218E-02
   .1872979E-02   .7245497E-02   .1782330E-01   .2499613E-01   .2139916E-01
   .5747430E-02  -.1524691E-01  -.3066939E-01  -.3308882E-01  -.2356831E-01
  -.1002602E-01  -.3635704E-03   .3149623E-02   .2340028E-02  -.1889105E-02
  -.1021906E-01  -.2169352E-01  -.3242724E-01  -.3710605E-01  -.3192119E-01
  -.1830031E-01  -.3247453E-02   .6787857E-02   .1103071E-01   .1154330E-01
   .8533167E-02   .1833240E-02  -.6709214E-02  -.1443093E-01  -.1797956E-01
  -.1444035E-01  -.6524259E-02  -.2939244E-02  -.9240372E-02  -.2207908E-01
  -.3385394E-01  -.3845771E-01  -.3354200E-01  -.2218865E-01  -.1142950E-01
  -.6241032E-02  -.6524696E-02  -.9853090E-02  -.1247198E-01  -.8749181E-02
   .4643338E-02   .2497920E-01   .4646845E-01   .6459357E-01   .7660579E-01
   .8168671E-01   .8181071E-01   .7959869E-01   .7566574E-01   .6981001E-01
   .6326563E-01   .5843632E-01   .5654515E-01   .5681809E-01   .5731555E-01
   .5670014E-01   .5491712E-01   .5215217E-01   .4872484E-01   .4516792E-01
   .3965407E-01   .2733120E-01   .7393938E-02  -.1168009E-01  -.2175450E-01
  -.2658843E-01  -.3402342E-01  -.4320167E-01  -.5112937E-01  -.6211247E-01
  -.7785548E-01  -.8746496E-01  -.8005726E-01  -.6223575E-01  -.5254624E-01
  -.6090553E-01  -.8083625E-01  -.1006845E+00  -.1152437E+00  -.1250455E+00
  -.1308037E+00  -.1339189E+00  -.1389022E+00  -.1495192E+00  -.1639896E+00
  -.1775038E+00  -.1876497E+00  -.1937474E+00  -.1934456E+00  -.1847556E+00
  -.1710724E+00  -.1596758E+00  -.1552197E+00  -.1583186E+00  -.1691168E+00
  -.1852823E+00  -.1978056E+00  -.1974889E+00  -.1866143E+00  -.1757914E+00
  -.1688779E+00  -.1609183E+00  -.1511534E+00  -.1470759E+00  -.1538922E+00
  -.1681432E+00  -.1842450E+00  -.2005137E+00  -.2169463E+00  -.2324547E+00
  -.2457022E+00  -.2564350E+00  -.2644120E+00  -.2685039E+00  -.2682324E+00
  -.2657839E+00  -.2660212E+00  -.2729419E+00  -.2849585E+00  -.2954600E+00
  -.2991609E+00  -.2964215E+00  -.2903719E+00  -.2822530E+00  -.2720180E+00
  -.2609809E+00  -.2510155E+00  -.2423828E+00  -.2342117E+00  -.2257473E+00
  -.2163907E+00  -.2070570E+00  -.2010504E+00  -.1999843E+00  -.2005891E+00
  -.1988219E+00  -.1944129E+00  -.1876488E+00  -.1748608E+00  -.1525764E+00
  -.1237380E+00  -.9515111E-01  -.7043085E-01  -.4961446E-01  -.3282384E-01
  -.1910171E-01  -.3302906E-02   .2094458E-01   .5588123E-01   .9836697E-01
   .1404513E+00   .1719310E+00   .1862277E+00   .1840055E+00   .1689466E+00
   .1430755E+00   .1108163E+00   .8205691E-01   .6484530E-01   .5838621E-01
   .5717340E-01   .5894975E-01   .6562281E-01   .7890597E-01   .9748413E-01
   .1177896E+00   .1355158E+00   .1474729E+00   .1541601E+00   .1609067E+00
   .1750653E+00   .1991990E+00   .2259725E+00   .2428355E+00   .2436391E+00
   .2335626E+00   .2224902E+00   .2162420E+00   .2148801E+00   .2151943E+00
   .2109346E+00   .1938365E+00   .1601162E+00   .1155413E+00   .7154252E-01
   .3762651E-01   .1837591E-01   .1322879E-01   .1776329E-01   .2980648E-01
   .5088799E-01   .7627157E-01   .9185215E-01   .9038510E-01   .8063089E-01
   .7174352E-01   .6104912E-01   .4612036E-01   .3650986E-01   .4257981E-01
   .6093679E-01   .8018304E-01   .9599706E-01   .1125959E+00   .1307142E+00
   .1420470E+00   .1392379E+00   .1262548E+00   .1134531E+00   .1064532E+00
   .1052477E+00   .1103259E+00   .1211934E+00   .1297947E+00   .1243331E+00
   .1017700E+00   .7207254E-01   .4898430E-01   .3910655E-01   .3892896E-01
   .3937649E-01   .3475884E-01   .2899321E-01   .2885409E-01   .3101024E-01
   .2284227E-01  -.2300860E-02  -.3690280E-01  -.6848900E-01  -.9091524E-01
  -.1049669E+00  -.1149039E+00  -.1265820E+00  -.1434353E+00  -.1609762E+00
  -.1682979E+00  -.1582230E+00  -.1356789E+00  -.1143477E+00  -.1057096E+00
  -.1126961E+00  -.1313545E+00  -.1537351E+00  -.1706131E+00  -.1758525E+00
  -.1682273E+00  -.1493445E+00  -.1213812E+00  -.8743666E-01  -.5278505E-01
  -.2401856E-01  -.5920958E-02   .1448758E-02   .1503492E-02  -.3319937E-02
  -.1202831E-01  -.2020762E-01  -.1942288E-01  -.3914867E-02   .2315049E-01
   .4928659E-01   .5851637E-01   .4321699E-01   .1293173E-01  -.1176432E-01
  -.1687457E-01  -.5652441E-02   .8838237E-02   .1923285E-01   .2968287E-01
   .4759675E-01   .7262342E-01   .9736158E-01   .1174474E+00   .1340483E+00
   .1461088E+00   .1485062E+00   .1401215E+00   .1272027E+00   .1168749E+00
   .1117121E+00   .1109904E+00   .1129457E+00   .1150745E+00   .1142436E+00
   .1082164E+00   .9747623E-01   .8522233E-01   .7497791E-01   .6905090E-01
   .7002827E-01   .7975570E-01   .9424542E-01   .1039327E+00   .1019661E+00
   .8773286E-01   .6126209E-01   .2299270E-01  -.1717466E-01  -.4132871E-01
  -.4087884E-01  -.2520029E-01  -.8124760E-02   .7957799E-02   .2821311E-01
   .5019368E-01   .6046746E-01   .4840283E-01   .1923963E-01  -.1127526E-01
  -.3269818E-01  -.4427297E-01  -.4699561E-01  -.4077634E-01  -.3004501E-01
  -.2317631E-01  -.2373824E-01  -.2826348E-01  -.3354440E-01  -.3940305E-01
  -.4440216E-01  -.4589811E-01  -.4377086E-01  -.3869358E-01  -.2772624E-01
  -.7865373E-02   .1490783E-01   .2537617E-01   .1075143E-01  -.2822454E-01
  -.7700391E-01  -.1153214E+00  -.1273430E+00  -.1108741E+00  -.8019731E-01
  -.5633001E-01  -.5072994E-01  -.5785145E-01  -.6407033E-01  -.6317572E-01
  -.5998542E-01  -.5994496E-01  -.6407148E-01  -.7399072E-01  -.9070478E-01
  -.1070042E+00  -.1120304E+00  -.1050568E+00  -.9537172E-01  -.9009830E-01
  -.8981251E-01  -.9199970E-01  -.9241050E-01  -.8642634E-01  -.7290570E-01
  -.5697626E-01  -.4780760E-01  -.4985470E-01  -.5472206E-01  -.4796355E-01
  -.2691432E-01  -.4872849E-02   .4194614E-02  -.2636094E-02  -.2160536E-01
  -.4931799E-01  -.8198049E-01  -.1128031E+00  -.1344252E+00  -.1420207E+00
  -.1327288E+00  -.1067362E+00  -.7198484E-01  -.4276150E-01  -.2822439E-01
  -.2482895E-01  -.2394359E-01  -.2315369E-01  -.2424848E-01  -.2415831E-01
  -.1688067E-01  -.4480054E-02   .3263129E-02   .3032991E-02   .2889718E-02
   .8595518E-02   .1165798E-01  -.3818314E-02  -.4472332E-01  -.9914832E-01
  -.1397357E+00  -.1410284E+00  -.1013518E+00  -.4566885E-01  -.2233474E-02
   .2011421E-01   .2715403E-01   .2105374E-01   .4905411E-04  -.2742121E-01
  -.4258563E-01  -.3500341E-01  -.1402124E-01   .2417025E-02   .5230880E-02
  -.1955775E-02  -.1143576E-01  -.1835159E-01  -.2069156E-01  -.1795375E-01
  -.1152329E-01  -.3669356E-02   .4359579E-02   .1139768E-01   .1318828E-01
   .3242885E-02  -.2071446E-01  -.5192138E-01  -.7788905E-01  -.8989159E-01
  -.9020787E-01  -.8921445E-01  -.9321184E-01  -.9516596E-01  -.8069877E-01
  -.4605683E-01  -.7540148E-02   .1102932E-01  -.1993046E-03  -.2914234E-01
  -.5282523E-01  -.5542948E-01  -.3762776E-01  -.1155216E-01   .8431936E-02
   .1010045E-01  -.1067303E-01  -.4199611E-01  -.6373185E-01  -.6898566E-01
  -.6933501E-01  -.7552310E-01  -.8321673E-01  -.8148241E-01  -.6742698E-01
  -.4953980E-01  -.3972436E-01  -.4165945E-01  -.4785824E-01  -.5166069E-01
  -.5492418E-01  -.5709142E-01  -.4769706E-01  -.2043455E-01   .1429357E-01
   .4146117E-01   .5831130E-01   .7012882E-01   .7847516E-01   .8366831E-01
   .9149178E-01   .1064992E+00   .1232555E+00   .1311064E+00   .1258596E+00
   .1143202E+00   .1066512E+00   .1055607E+00   .1062465E+00   .1053543E+00
   .1039123E+00   .1020400E+00   .9778954E-01   .9076129E-01   .8054703E-01
   .6391392E-01   .4042474E-01   .1983689E-01   .1592368E-01   .3188693E-01
   .5727713E-01   .7813368E-01   .8657086E-01   .8332620E-01   .7497280E-01
   .6880950E-01   .6917138E-01   .7687573E-01   .8902626E-01   .9954718E-01
   .1040894E+00   .1043876E+00   .1048569E+00   .1069585E+00   .1084646E+00
   .1062590E+00   .9813958E-01   .8381191E-01   .6531816E-01   .4527419E-01
   .2515897E-01   .5632696E-02  -.1239777E-01  -.2828191E-01  -.4394362E-01
  -.6470488E-01  -.9404056E-01  -.1267039E+00  -.1507662E+00  -.1566171E+00
  -.1424653E+00  -.1146746E+00  -.8608748E-01  -.7054560E-01  -.7410959E-01
  -.8966970E-01  -.9971570E-01  -.8750593E-01  -.5127809E-01  -.8256924E-02
   .1908273E-01   .2115448E-01   .4349906E-02  -.2051895E-01  -.4568539E-01
  -.6301109E-01  -.6399157E-01  -.4856519E-01  -.2669021E-01  -.6898578E-02
   .1109291E-01   .2756968E-01   .3281873E-01   .1583886E-01  -.1832594E-01
  -.4985191E-01  -.6514819E-01  -.6793703E-01  -.6711019E-01  -.6412418E-01
  -.5630790E-01  -.4442198E-01  -.3132898E-01  -.1775431E-01  -.4051250E-02
   .7950889E-02   .1785438E-01   .2723554E-01   .3474999E-01   .3523125E-01
   .2593360E-01   .1009075E-01  -.5806088E-02  -.1371575E-01  -.4606989E-02
   .2528654E-01   .6803524E-01   .1085670E+00   .1353205E+00   .1444152E+00
   .1371512E+00   .1186286E+00   .9833757E-01   .8606453E-01   .8446900E-01
   .8823384E-01   .9152437E-01   .9428046E-01   .9855562E-01   .1014489E+00
   .9787204E-01   .8895227E-01   .8067477E-01   .7486581E-01   .6799082E-01
   .5704983E-01   .4075363E-01   .1773365E-01  -.8625041E-02  -.2614488E-01
  -.2364286E-01  -.4894375E-02   .1390445E-01   .2039868E-01   .1379296E-01
  -.2685163E-02  -.2840706E-01  -.6114386E-01  -.9304518E-01  -.1156577E+00
  -.1274073E+00  -.1323124E+00  -.1337701E+00  -.1339299E+00  -.1351072E+00
  -.1363446E+00  -.1312594E+00  -.1160822E+00  -.9842980E-01  -.9028611E-01
  -.9150092E-01  -.8805477E-01  -.7008132E-01  -.4592743E-01  -.3596260E-01
  -.5596900E-01  -.1057589E+00  -.1663739E+00  -.2070845E+00  -.2014371E+00
  -.1410223E+00  -.3789440E-01   .8074132E-01   .1819051E+00   .2403946E+00
   .2504584E+00   .2263667E+00   .1930660E+00   .1735865E+00   .1772115E+00
   .1965500E+00   .2178334E+00   .2341256E+00   .2461604E+00   .2527453E+00
   .2477407E+00   .2281877E+00   .1996109E+00   .1713324E+00   .1506976E+00
   .1422550E+00   .1452315E+00   .1497675E+00   .1432313E+00   .1236780E+00
   .1014322E+00   .8618753E-01   .7921850E-01   .7922125E-01   .8675536E-01
   .9761809E-01   .9914944E-01   .8048871E-01   .4444026E-01   .4432308E-02
  -.2926423E-01  -.5528111E-01  -.7191757E-01  -.7029695E-01  -.4551860E-01
  -.8815898E-02   .2169919E-01   .3799105E-01   .4196171E-01   .3402496E-01
   .1302703E-01  -.1470063E-01  -.3634965E-01  -.4382168E-01  -.3929578E-01
  -.3067337E-01  -.2551790E-01  -.2899083E-01  -.4362153E-01  -.6796276E-01
  -.9574603E-01  -.1201582E+00  -.1392863E+00  -.1533232E+00  -.1577094E+00
  -.1461242E+00  -.1197487E+00  -.8743605E-01  -.5723149E-01  -.3249940E-01
  -.1551217E-01  -.1143270E-01  -.2854748E-01  -.7209639E-01  -.1324189E+00
  -.1833138E+00  -.2012764E+00  -.1856053E+00  -.1555475E+00  -.1313155E+00
  -.1204609E+00  -.1173505E+00  -.1096020E+00  -.8760164E-01  -.5204296E-01
  -.1116411E-01   .2886476E-01   .6855016E-01   .1110314E+00   .1556246E+00
   .1951981E+00   .2208762E+00   .2305368E+00   .2300525E+00   .2246137E+00
   .2133367E+00   .1953517E+00   .1765450E+00   .1652507E+00   .1638532E+00
   .1694193E+00   .1782401E+00   .1847530E+00   .1805476E+00   .1607924E+00
   .1288649E+00   .9174951E-01   .5422256E-01   .1875145E-01  -.1353579E-01
  -.4384596E-01  -.7391037E-01  -.1016395E+00  -.1214000E+00  -.1305539E+00
  -.1323582E+00  -.1305419E+00  -.1236878E+00  -.1061694E+00  -.7539949E-01
  -.3869715E-01  -.9666438E-02   .3773793E-02   .3744142E-02  -.4894367E-02
  -.1887529E-01  -.3232758E-01  -.3652842E-01  -.2845750E-01  -.1549028E-01
  -.7523445E-02  -.7385937E-02  -.1082548E-01  -.1284003E-01  -.1194087E-01
  -.9846150E-02  -.8121520E-02  -.4643627E-02   .4981841E-02   .2225088E-01
   .4497929E-01   .6897249E-01   .8620246E-01   .8586170E-01   .6308592E-01
   .2267577E-01  -.2922464E-01  -.8777034E-01  -.1393645E+00  -.1613456E+00
  -.1402560E+00  -.8574384E-01  -.2419285E-01   .1814270E-01   .2783815E-01
   .7802642E-02  -.2778668E-01  -.6321301E-01  -.8798950E-01  -.9741103E-01
  -.9097013E-01  -.7286723E-01  -.5239196E-01  -.3981795E-01  -.3963841E-01
  -.4725537E-01  -.5340835E-01  -.5277562E-01  -.4699809E-01  -.4068847E-01
  -.3668139E-01  -.3447354E-01  -.3128601E-01  -.2538699E-01  -.1844352E-01
  -.1358036E-01  -.1204099E-01  -.1291976E-01  -.1453189E-01  -.1449223E-01
  -.9446127E-02   .3604368E-02   .2622336E-01   .5785351E-01   .9483047E-01
   .1307170E+00   .1588564E+00   .1749333E+00   .1768730E+00   .1634650E+00
   .1349253E+00   .9395719E-01   .4671715E-01   .3842403E-02  -.2327651E-01
  -.3166919E-01  -.3067600E-01  -.3350189E-01  -.4568677E-01  -.6305742E-01
  -.7805190E-01  -.8558056E-01  -.8449805E-01  -.7581853E-01  -.6105995E-01
  -.4353014E-01  -.2881397E-01  -.2083318E-01  -.1892679E-01  -.2150417E-01
  -.2891431E-01  -.3919787E-01  -.4613019E-01  -.4522524E-01  -.3676841E-01
  -.2204168E-01  -.2498870E-02   .1657752E-01   .2806260E-01   .2946197E-01
   .2322981E-01   .1270587E-01   .2183917E-02  -.1768038E-02   .5687396E-02
   .2351704E-01   .4794030E-01   .7696711E-01   .1077714E+00   .1316174E+00
   .1375613E+00   .1212191E+00   .8754056E-01   .4720357E-01   .1217261E-01
  -.8987313E-02  -.1651370E-01  -.1909708E-01  -.2584753E-01  -.3971224E-01
  -.5907960E-01  -.8166800E-01  -.1039549E+00  -.1190464E+00  -.1187474E+00
  -.9955209E-01  -.6613999E-01  -.2867854E-01   .1887312E-02   .1558054E-01
   .4701199E-02  -.3133885E-01  -.8241005E-01  -.1319797E+00  -.1666389E+00
  -.1815398E+00  -.1799799E+00  -.1704876E+00  -.1627047E+00  -.1625066E+00
  -.1690372E+00  -.1769967E+00  -.1811364E+00  -.1791097E+00  -.1730736E+00
  -.1690202E+00  -.1717501E+00  -.1799524E+00  -.1895898E+00  -.2003786E+00
  -.2137630E+00  -.2272120E+00  -.2367266E+00  -.2419232E+00  -.2437527E+00
  -.2403574E+00  -.2299073E+00  -.2154453E+00  -.2024179E+00  -.1922325E+00
  -.1812517E+00  -.1640558E+00  -.1356200E+00  -.9313868E-01  -.3940515E-01
   .1517947E-01   .5683045E-01   .7745089E-01   .8170504E-01   .8378784E-01
   .9312207E-01   .1036990E+00   .1013865E+00   .8111814E-01   .5281838E-01
   .3113646E-01   .2301894E-01   .2468483E-01   .2764055E-01   .2710178E-01
   .2580229E-01   .2897330E-01   .3542629E-01   .3701729E-01   .2944228E-01
   .1885601E-01   .1335357E-01   .1204099E-01   .7660124E-02  -.3173994E-02
  -.1703834E-01  -.2799934E-01  -.3124176E-01  -.2414004E-01  -.6932413E-02
   .1652230E-01   .4025626E-01   .5989792E-01   .7455826E-01   .8546104E-01
   .9377010E-01   .1001990E+00   .1058485E+00   .1125496E+00   .1212827E+00
   .1301597E+00   .1351830E+00   .1348964E+00   .1320989E+00   .1291457E+00
   .1258894E+00   .1245509E+00   .1303958E+00   .1415047E+00   .1418473E+00
   .1124169E+00   .5097779E-01  -.2225709E-01  -.7956165E-01  -.1041675E+00
  -.9466903E-01  -.5854819E-01  -.7857751E-02   .4127570E-01   .7416367E-01
   .8661899E-01   .8504212E-01   .7605378E-01   .6021926E-01   .3952947E-01
   .2623140E-01   .3539340E-01   .6711732E-01   .1045735E+00   .1327785E+00
   .1503758E+00   .1599718E+00   .1565064E+00   .1321059E+00   .8801344E-01
   .3439936E-01  -.1984518E-01  -.6979582E-01  -.1054115E+00  -.1077770E+00
  -.6556032E-01   .3655322E-02   .5987522E-01   .7544516E-01   .5586061E-01
   .2271995E-01  -.1124326E-01  -.4218451E-01  -.6149135E-01  -.5526172E-01
  -.1828211E-01   .3604968E-01   .8357607E-01   .1098922E+00   .1195741E+00
   .1221874E+00   .1172382E+00   .1019624E+00   .8562813E-01   .8369519E-01
   .1013121E+00   .1309494E+00   .1623677E+00   .1882603E+00   .2031242E+00
   .2021536E+00   .1829329E+00   .1487471E+00   .1105361E+00   .8142238E-01
   .6691784E-01   .6512424E-01   .7609811E-01   .1017084E+00   .1356962E+00
   .1637162E+00   .1754640E+00   .1702031E+00   .1514382E+00   .1246621E+00
   .9911414E-01   .8423723E-01   .8329951E-01   .9326261E-01   .1097151E+00
   .1286196E+00   .1432639E+00   .1446539E+00   .1299283E+00   .1077555E+00
   .9061294E-01   .8293851E-01   .8111541E-01   .8325357E-01   .9102909E-01
   .1011083E+00   .1018147E+00   .8120540E-01   .3868362E-01  -.1027669E-01
  -.4195964E-01  -.4065624E-01  -.1009415E-01   .3137234E-01   .6629844E-01
   .8714736E-01   .9293075E-01   .8291128E-01   .5604891E-01   .1476621E-01
  -.3243464E-01  -.7375578E-01  -.1007576E+00  -.1110206E+00  -.1068810E+00
  -.9600431E-01  -.8962101E-01  -.9293229E-01  -.9911704E-01  -.9856037E-01
  -.9067463E-01  -.8093067E-01  -.7096626E-01  -.5791770E-01  -.4172784E-01
  -.2930843E-01  -.3034818E-01  -.4848444E-01  -.7759797E-01  -.1090285E+00
  -.1390633E+00  -.1656152E+00  -.1840347E+00  -.1919936E+00  -.1934740E+00
  -.1915390E+00  -.1820768E+00  -.1612766E+00  -.1344855E+00  -.1108282E+00
  -.9267273E-01  -.7497251E-01  -.5036248E-01  -.1239127E-01   .3954561E-01
   .9653277E-01   .1455495E+00   .1784362E+00   .1936027E+00   .1917231E+00
   .1750421E+00   .1500840E+00   .1268170E+00   .1133313E+00   .1112252E+00
   .1169126E+00   .1263208E+00   .1360734E+00   .1417545E+00   .1403370E+00
   .1350083E+00   .1326292E+00   .1352176E+00   .1379371E+00   .1362369E+00
   .1294503E+00   .1165912E+00   .9393302E-01   .5866639E-01   .1237781E-01
  -.3927745E-01  -.8865927E-01  -.1290217E+00  -.1583636E+00  -.1807104E+00
  -.2013287E+00  -.2196620E+00  -.2292694E+00  -.2256102E+00  -.2093867E+00
  -.1819322E+00  -.1447307E+00  -.1055116E+00  -.7577178E-01  -.5839215E-01
  -.4526107E-01  -.2851044E-01  -.7397163E-02   .1620977E-01   .4311157E-01
   .7524397E-01   .1096169E+00   .1353494E+00   .1401894E+00   .1211491E+00
   .8504157E-01   .3849988E-01  -.1401356E-01  -.5815088E-01  -.6734514E-01
  -.2651124E-01   .4346430E-01   .9533406E-01   .9486259E-01   .5064310E-01
   .5297119E-02  -.3586981E-02   .2579852E-01   .6711512E-01   .9490058E-01
   .9854545E-01   .7671457E-01   .3276824E-01  -.2144774E-01  -.6693796E-01
  -.8939174E-01  -.8888226E-01  -.7505226E-01  -.5552541E-01  -.3374444E-01
  -.1462835E-01  -.3727868E-02   .5316258E-03   .7324941E-02   .2254223E-01
   .4055263E-01   .4970442E-01   .4431778E-01   .2850654E-01   .9554190E-02
  -.8642316E-02  -.2559331E-01  -.4109324E-01  -.5318408E-01  -.5888148E-01
  -.5757986E-01  -.5307903E-01  -.5010105E-01  -.4881421E-01  -.4487935E-01
  -.3518851E-01  -.2113549E-01  -.6208129E-02   .7283891E-02   .1888575E-01
   .2939757E-01   .4053639E-01   .5360393E-01   .6682788E-01   .7509236E-01
   .7386115E-01   .6322011E-01   .4732822E-01   .2971431E-01   .1167634E-01
  -.5567821E-02  -.2026837E-01  -.3102861E-01  -.3635530E-01  -.3390257E-01
  -.2316569E-01  -.9078780E-02   .5977714E-03   .1882243E-02  -.3311602E-02
  -.1006314E-01  -.1380000E-01  -.1307733E-01  -.1039383E-01  -.9293050E-02
  -.1182679E-01  -.1929171E-01  -.3151050E-01  -.4455881E-01  -.5376812E-01
  -.5947224E-01  -.6624607E-01  -.7580428E-01  -.8452918E-01  -.8830361E-01
  -.8639186E-01  -.7966668E-01  -.6885301E-01  -.5656820E-01  -.4957241E-01
  -.5468831E-01  -.7030947E-01  -.8632173E-01  -.9521439E-01  -.9990585E-01
  -.1077079E+00  -.1201666E+00  -.1341067E+00  -.1477372E+00  -.1593806E+00
  -.1644697E+00  -.1594435E+00  -.1459655E+00  -.1281512E+00  -.1091070E+00
  -.9143904E-01  -.7738809E-01  -.6665544E-01  -.5683403E-01  -.4626621E-01
  -.3428572E-01  -.1919928E-01   .8415960E-03   .2459661E-01   .4731010E-01
   .6453202E-01   .7662782E-01   .8844320E-01   .1036054E+00   .1205369E+00
   .1350997E+00   .1451386E+00   .1505933E+00   .1512057E+00   .1474966E+00
   .1422336E+00   .1382646E+00   .1359477E+00   .1345905E+00   .1349314E+00
   .1378551E+00   .1417295E+00   .1434320E+00   .1415308E+00   .1367236E+00
   .1296383E+00   .1203635E+00   .1097026E+00   .9876554E-01   .8736641E-01
   .7448146E-01   .5968457E-01   .4234956E-01   .2141428E-01  -.1877992E-02
  -.2222423E-01  -.3313400E-01  -.3150050E-01  -.1940784E-01  -.3120177E-02
   .1019282E-01   .1693634E-01   .1889586E-01   .1979657E-01   .2128700E-01
   .2278220E-01   .2346573E-01   .2349940E-01   .2335789E-01   .2223053E-01
   .1867992E-01   .1309972E-01   .7812172E-02   .5350996E-02   .7747388E-02
   .1643402E-01   .3058284E-01   .4607625E-01   .5727587E-01   .6024117E-01
   .5572004E-01   .4942538E-01   .4736501E-01   .4977231E-01   .5140185E-01
   .4881347E-01   .4421578E-01   .4059064E-01   .3689027E-01   .3033753E-01
   .2095748E-01   .1177283E-01   .6078287E-02   .5445694E-02   .8859569E-02
   .1194625E-01   .9400032E-02   .1965519E-03  -.1145999E-01  -.2124882E-01
  -.2846285E-01  -.3386278E-01  -.3610321E-01  -.3330244E-01  -.2684260E-01
  -.2134585E-01  -.2103871E-01  -.2662061E-01  -.3466747E-01  -.3989224E-01
  -.3936159E-01  -.3487794E-01  -.2984347E-01  -.2475659E-01  -.1793191E-01
  -.9381303E-02  -.1778425E-02   .1498048E-02  -.1460816E-02  -.9849075E-02
  -.1993920E-01  -.2700691E-01  -.2912070E-01  -.2817141E-01  -.2720148E-01
  -.2797149E-01  -.3093392E-01  -.3548049E-01  -.3958797E-01  -.3946690E-01
  -.3134841E-01  -.1447975E-01   .8102237E-02   .3136388E-01   .5052107E-01
   .6203236E-01   .6391364E-01   .5732004E-01   .4711524E-01   .3865572E-01
   .3419113E-01   .3288283E-01   .3316586E-01   .3330080E-01   .3081531E-01
   .2375731E-01   .1256361E-01  -.3947626E-03  -.1252436E-01  -.2179267E-01
  -.2707519E-01  -.2922222E-01  -.3125327E-01  -.3545618E-01  -.4057246E-01
  -.4294403E-01  -.4102190E-01  -.3690047E-01  -.3284918E-01  -.2946094E-01
  -.2803544E-01  -.3162032E-01  -.4128146E-01  -.5278511E-01  -.6020945E-01
  -.6134566E-01  -.5693945E-01  -.4661029E-01  -.2948758E-01  -.8999645E-02
   .6945584E-02   .1229802E-01   .7613341E-02  -.1105642E-02  -.6804589E-02
  -.5659940E-02   .1763790E-02   .1297005E-01   .2549249E-01   .3618661E-01
   .4158547E-01   .4200711E-01   .4258669E-01   .4815630E-01   .5926674E-01
   .7392953E-01   .9051554E-01   .1073691E+00   .1218989E+00   .1324009E+00
   .1394517E+00   .1439995E+00   .1457119E+00   .1441569E+00   .1406935E+00
   .1377952E+00   .1367326E+00   .1366931E+00   .1355919E+00   .1312606E+00
   .1223649E+00   .1096442E+00   .9571706E-01   .8289643E-01   .7222171E-01
   .6395276E-01   .5757347E-01   .5125709E-01   .4256555E-01   .3066190E-01
   .1808797E-01   .9499105E-02   .7947219E-02   .1243392E-01   .1966304E-01
   .2753904E-01   .3572562E-01   .4242949E-01   .4358617E-01   .3710774E-01
   .2499485E-01   .9918847E-02  -.7972901E-02  -.2919092E-01  -.5242285E-01
  -.7502656E-01  -.9406360E-01  -.1072941E+00  -.1143343E+00  -.1168785E+00
  -.1171465E+00  -.1166304E+00  -.1171253E+00  -.1206983E+00  -.1274520E+00
  -.1366473E+00  -.1499647E+00  -.1695428E+00  -.1918846E+00  -.2082250E+00
  -.2122687E+00  -.2060089E+00  -.1970552E+00  -.1904951E+00  -.1857939E+00
  -.1830414E+00  -.1884798E+00  -.2077525E+00  -.2350416E+00  -.2551924E+00
  -.2564618E+00  -.2372676E+00  -.2039249E+00  -.1667939E+00  -.1360399E+00
  -.1156498E+00  -.1000698E+00  -.7964035E-01  -.5168404E-01  -.2297010E-01
   .6137197E-03   .2097548E-01   .4209841E-01   .6237016E-01   .7440381E-01
   .7112352E-01   .5370243E-01   .3468521E-01   .2839964E-01   .3670099E-01
   .4834239E-01   .5214837E-01   .4583086E-01   .3330797E-01   .1941170E-01
   .7012627E-02  -.3527193E-02  -.1199891E-01  -.1639480E-01  -.1527827E-01
  -.1114475E-01  -.1008461E-01  -.1712213E-01  -.3191267E-01  -.4919741E-01
  -.6321324E-01  -.7043769E-01  -.6752186E-01  -.4955228E-01  -.1477008E-01
   .2939031E-01   .6900987E-01   .9344017E-01   .1006784E+00   .9400547E-01
   .7817456E-01   .5963722E-01   .4492099E-01   .3505512E-01   .2408166E-01
   .7078742E-02  -.1102183E-01  -.1889706E-01  -.1126883E-01   .5246098E-02
   .1795833E-01   .1898197E-01   .1106427E-01   .3526162E-02   .2551391E-02
   .5688552E-02   .6003251E-02  -.2152604E-03  -.1082847E-01  -.2093313E-01
  -.2689939E-01  -.2701992E-01  -.1820046E-01   .4281574E-02   .3860242E-01
   .7077240E-01   .8639622E-01   .8881045E-01   .9695730E-01   .1224174E+00
   .1541011E+00   .1685108E+00   .1509466E+00   .1061571E+00   .5402210E-01
   .1626363E-01   .2155741E-02   .4787763E-02   .1316195E-01   .2652577E-01
   .5019214E-01   .7713782E-01   .8597692E-01   .6561573E-01   .3362200E-01
   .1802386E-01   .2596894E-01   .4349497E-01   .6035842E-01   .7901667E-01
   .1013932E+00   .1204091E+00   .1269568E+00   .1186430E+00   .1002333E+00
   .7783323E-01   .5124138E-01   .1390135E-01  -.3548252E-01  -.8432576E-01
  -.1145175E+00  -.1172162E+00  -.9607806E-01  -.6083299E-01  -.2287092E-01
   .6396980E-02   .1918471E-01   .1403022E-01  -.4169075E-02  -.2577225E-01
  -.4107660E-01  -.4717015E-01  -.4924620E-01  -.5306951E-01  -.5782344E-01
  -.5816389E-01  -.4993706E-01  -.3242457E-01  -.9471975E-02   .1080441E-01
   .2136049E-01   .2371207E-01   .2783102E-01   .4232895E-01   .6667916E-01
   .9308550E-01   .1124383E+00   .1184453E+00   .1099133E+00   .9136819E-01
   .7000142E-01   .5094564E-01   .3650087E-01   .2839749E-01   .2890434E-01
   .3921568E-01   .5680187E-01   .7479221E-01   .8488056E-01   .8122352E-01
   .6135881E-01   .2636465E-01  -.1643919E-01  -.5368137E-01  -.7316945E-01
  -.7217379E-01  -.5904319E-01  -.4748979E-01  -.4684162E-01  -.5475456E-01
  -.6205982E-01  -.6579591E-01  -.7171267E-01  -.8262875E-01  -.9182286E-01
  -.9166534E-01  -.8289754E-01  -.7208360E-01  -.6493866E-01  -.6569808E-01
  -.7759187E-01  -.9907105E-01  -.1213489E+00  -.1341897E+00  -.1341603E+00
  -.1240121E+00  -.1053759E+00  -.7793476E-01  -.4572340E-01  -.1761238E-01
   .4692674E-04   .6899433E-02   .5448690E-02   .2740008E-03  -.2988755E-03
   .1149259E-01   .3315746E-01   .5089438E-01   .5349502E-01   .4458513E-01
   .3512379E-01   .2705006E-01   .1269319E-01  -.1090608E-01  -.3709245E-01
  -.5910520E-01  -.7654088E-01  -.9107050E-01  -.1014911E+00  -.1052099E+00
  -.1011806E+00  -.8967822E-01  -.7237099E-01  -.5377035E-01  -.4005532E-01
  -.3530519E-01  -.4005564E-01  -.5264198E-01  -.6942188E-01  -.8381524E-01
  -.8930553E-01  -.8476001E-01  -.7565334E-01  -.7044478E-01  -.7411347E-01
  -.8366616E-01  -.9142649E-01  -.9262252E-01  -.8825369E-01  -.8179593E-01
  -.7644507E-01  -.7428393E-01  -.7471497E-01  -.7424075E-01  -.6999760E-01
  -.6303365E-01  -.5646103E-01  -.5137942E-01  -.4652771E-01  -.4162592E-01
  -.3868196E-01  -.3977515E-01  -.4444670E-01  -.4945437E-01  -.5185400E-01
  -.5202275E-01  -.5268210E-01  -.5542900E-01  -.5876148E-01  -.5969698E-01
  -.5702930E-01  -.5096612E-01  -.3954270E-01  -.1906310E-01   .9662117E-02
   .3694425E-01   .5014615E-01   .4496373E-01   .2981980E-01   .1921533E-01
   .2234630E-01   .3705776E-01   .5430845E-01   .6715884E-01   .7447035E-01
   .7736910E-01   .7542229E-01   .6780640E-01   .5658960E-01   .4599819E-01
   .3877053E-01   .3533455E-01   .3566288E-01   .3983033E-01   .4651715E-01
   .5206530E-01   .5266142E-01   .4846821E-01   .4331725E-01   .3962098E-01
   .3640333E-01   .3354930E-01   .3367754E-01   .3700890E-01   .3880566E-01
   .3568954E-01   .3043089E-01   .2780696E-01   .2987576E-01   .3662436E-01
   .4672347E-01   .5611016E-01   .6018155E-01   .5900499E-01   .5637452E-01
   .5393952E-01   .5042124E-01   .4534064E-01   .3877029E-01   .2928941E-01
   .1684710E-01   .4652543E-02  -.5262845E-02  -.1552030E-01  -.2982238E-01
  -.4814606E-01  -.6653228E-01  -.7981957E-01  -.8434549E-01  -.8024096E-01
  -.7169079E-01  -.6280269E-01  -.5347438E-01  -.4176138E-01  -.2872112E-01
  -.1821093E-01  -.1162110E-01  -.5353288E-02   .4565968E-02   .1629351E-01
   .2197719E-01   .1559938E-01   .3490458E-03  -.1433459E-01  -.2202362E-01
  -.2343659E-01  -.2203035E-01  -.1989121E-01  -.2003846E-01  -.2845182E-01
  -.4859503E-01  -.7397126E-01  -.9057901E-01  -.8879301E-01  -.7102558E-01
  -.4852200E-01  -.3335641E-01  -.3243406E-01  -.4588100E-01  -.6805443E-01
  -.9027955E-01  -.1058012E+00  -.1139067E+00  -.1171398E+00  -.1145790E+00
  -.1027675E+00  -.8354418E-01  -.6479710E-01  -.5248989E-01  -.4697049E-01
  -.4659914E-01  -.4965661E-01  -.5286916E-01  -.5280806E-01  -.4969029E-01
  -.4632219E-01  -.4394707E-01  -.4184391E-01  -.3999279E-01  -.4020586E-01
  -.4366507E-01  -.4913829E-01  -.5449489E-01  -.5927267E-01  -.6478823E-01
  -.7185813E-01  -.7873210E-01  -.8194352E-01  -.7860276E-01  -.6749926E-01
  -.4899971E-01  -.2462589E-01   .2925650E-02   .3008664E-01   .5398383E-01
   .7429079E-01   .9349026E-01   .1139899E+00   .1352153E+00   .1544005E+00
   .1694402E+00   .1796068E+00   .1845074E+00   .1836870E+00   .1764076E+00
   .1615711E+00   .1397513E+00   .1163043E+00   .1006554E+00   .9980736E-01
   .1123943E+00   .1294443E+00   .1415201E+00   .1448928E+00   .1402697E+00
   .1276517E+00   .1060723E+00   .7948034E-01   .5872008E-01   .5340704E-01
   .6178216E-01   .7148499E-01   .7103374E-01   .5856698E-01   .3992004E-01
   .2163388E-01   .7509939E-02  -.4525932E-03  -.8495897E-03   .5821983E-02
   .1608621E-01   .2565372E-01   .3154609E-01   .3132079E-01   .2336950E-01
   .9957734E-02  -.2304610E-02  -.6850503E-02  -.2296885E-02   .6141002E-02
   .1061810E-01   .7682118E-02   .1086548E-02  -.3674798E-02  -.7205480E-02
  -.1523617E-01  -.2929692E-01  -.4279636E-01  -.4609288E-01  -.3264603E-01
  -.2987350E-02   .3396722E-01   .6563298E-01   .8443444E-01   .9137306E-01
   .9160863E-01   .8904637E-01   .8452456E-01   .7712665E-01   .6672303E-01
   .5509548E-01   .4471156E-01   .3667617E-01   .3100365E-01   .2752980E-01
   .2465384E-01   .1894976E-01   .9860421E-02   .3880585E-02   .9744004E-02
   .2848099E-01   .5085921E-01   .6521645E-01   .6586513E-01   .5429412E-01
   .3549362E-01   .1433419E-01  -.5912557E-02  -.2317573E-01  -.3521984E-01
  -.3919808E-01  -.3310246E-01  -.1803370E-01   .2624052E-03   .1401964E-01
   .1896776E-01   .1580655E-01   .6617606E-02  -.7344186E-02  -.2327722E-01
  -.3479115E-01  -.3544754E-01  -.2467685E-01  -.8905354E-02   .2092163E-02
  -.3229716E-03  -.1927819E-01  -.4916917E-01  -.7783318E-01  -.9390357E-01
  -.9196852E-01  -.7194635E-01  -.3750573E-01   .2538303E-02   .3486015E-01
   .4876726E-01   .4244525E-01   .2092510E-01  -.9178171E-02  -.3991578E-01
  -.6187686E-01  -.6840051E-01  -.5825145E-01  -.3315725E-01   .3821384E-02
   .4558171E-01   .8053729E-01   .9892103E-01   .9801909E-01   .8107685E-01
   .5443793E-01   .2606759E-01   .3558873E-02  -.9398752E-02  -.1525457E-01
  -.1970164E-01  -.2540645E-01  -.2895777E-01  -.2601047E-01  -.1790919E-01
  -.1011310E-01  -.5184012E-02  -.7572316E-03   .5348020E-02   .1244602E-01
   .1987125E-01   .2779050E-01   .3413059E-01   .3510831E-01   .3099022E-01
   .2726532E-01   .2682028E-01   .2472500E-01   .1408677E-01  -.5842085E-02
  -.2969578E-01  -.5150562E-01  -.6741139E-01  -.7561824E-01  -.7745608E-01
  -.7701090E-01  -.7705736E-01  -.7547341E-01  -.6688155E-01  -.4856207E-01
  -.2387724E-01  -.1139313E-04   .1612864E-01   .2129558E-01   .1764970E-01
   .1080015E-01   .4367999E-02  -.3305338E-02  -.1533122E-01  -.3095310E-01
  -.4529188E-01  -.5202627E-01  -.4687649E-01  -.3169074E-01  -.1450025E-01
  -.3015119E-02   .1594913E-02   .3161663E-02   .4365484E-02   .4291441E-02
   .9905375E-03  -.5650130E-02  -.1401362E-01  -.2208504E-01  -.2856346E-01
  -.3311523E-01  -.3497332E-01  -.3286050E-01  -.2733738E-01  -.2079450E-01
  -.1333635E-01  -.1208939E-02   .1731474E-01   .3657848E-01   .4886989E-01
   .5396157E-01   .5895676E-01   .6863740E-01   .7980365E-01   .8616092E-01
   .8585702E-01   .8246207E-01   .8029615E-01   .8140574E-01   .8693888E-01
   .9775853E-01   .1108354E+00   .1191216E+00   .1188241E+00   .1147599E+00
   .1157939E+00   .1262766E+00   .1433630E+00   .1601139E+00   .1701422E+00
   .1705990E+00   .1618177E+00   .1462176E+00   .1290606E+00   .1167545E+00
   .1109828E+00   .1070196E+00   .9969723E-01   .8752982E-01   .7092508E-01
   .5097214E-01   .2961262E-01   .7230886E-02  -.1711273E-01  -.4060772E-01
  -.5686380E-01  -.6444743E-01  -.7006791E-01  -.7976137E-01  -.9201889E-01
  -.1022427E+00  -.1089856E+00  -.1137240E+00  -.1178356E+00  -.1215366E+00
  -.1245494E+00  -.1279015E+00  -.1337126E+00  -.1417125E+00  -.1486782E+00
  -.1526128E+00  -.1539480E+00  -.1519886E+00  -.1449392E+00  -.1345056E+00
  -.1250337E+00  -.1173052E+00  -.1082298E+00  -.9649531E-01  -.8446025E-01
  -.7470663E-01  -.6805222E-01  -.6408866E-01  -.6111860E-01  -.5743454E-01
  -.5568778E-01  -.6260997E-01  -.8017632E-01  -.1007093E+00  -.1143645E+00
  -.1182585E+00  -.1153441E+00  -.1086044E+00  -.1001424E+00  -.9250407E-01
  -.8693503E-01  -.8225741E-01  -.7774919E-01  -.7501755E-01  -.7494038E-01
  -.7385820E-01  -.6555710E-01  -.4784958E-01  -.2502245E-01  -.3311536E-02
   .1354889E-01   .2356334E-01   .2580196E-01   .2390449E-01   .2615036E-01
   .3746879E-01   .5246782E-01   .6021248E-01   .5602769E-01   .4611419E-01
   .3983729E-01   .4037172E-01   .4568073E-01   .5526382E-01   .7036265E-01
   .8895879E-01   .1049897E+00   .1135711E+00   .1151510E+00   .1135465E+00
   .1110388E+00   .1070677E+00   .1015956E+00   .9738651E-01   .9768773E-01
   .1030115E+00   .1114147E+00   .1201436E+00   .1260734E+00   .1264876E+00
   .1212063E+00   .1134592E+00   .1069069E+00   .1016196E+00   .9628150E-01
   .9412317E-01   .1006984E+00   .1141037E+00   .1241664E+00   .1247865E+00
   .1200086E+00   .1151817E+00   .1106385E+00   .1069266E+00   .1079433E+00
   .1144759E+00   .1196659E+00   .1153347E+00   .1010303E+00   .8404303E-01
   .7119829E-01   .6367420E-01   .5973534E-01   .5889712E-01   .6093411E-01
   .6249076E-01   .5878307E-01   .4924535E-01   .3760593E-01   .2493913E-01
   .7823748E-02  -.1383288E-01  -.3255918E-01  -.4141416E-01  -.4225483E-01
  -.4241735E-01  -.4702759E-01  -.5743492E-01  -.7242429E-01  -.8781470E-01
  -.9839130E-01  -.1009942E+00  -.9411939E-01  -.7814421E-01  -.5983057E-01
  -.5157217E-01  -.6017766E-01  -.7916740E-01  -.9640032E-01  -.1057469E+00
  -.1082129E+00  -.1070895E+00  -.1061421E+00  -.1081890E+00  -.1127061E+00
  -.1176737E+00  -.1231867E+00  -.1297150E+00  -.1341651E+00  -.1319413E+00
  -.1216632E+00  -.1044565E+00  -.8085771E-01  -.5182207E-01  -.2245846E-01
  -.1926039E-02   .2809741E-02  -.7926426E-02  -.2901516E-01  -.5589395E-01
  -.8434701E-01  -.1068733E+00  -.1150166E+00  -.1061162E+00  -.8548488E-01
  -.6264160E-01  -.4649018E-01  -.4236967E-01  -.5025994E-01  -.6398254E-01
  -.7372977E-01  -.7240764E-01  -.6095996E-01  -.4676813E-01  -.3654655E-01
  -.3215470E-01  -.3231473E-01  -.3474411E-01  -.3604693E-01  -.3320057E-01
  -.2606557E-01  -.1593404E-01  -.2509485E-02   .1422239E-01   .3112628E-01
   .4462542E-01   .5448755E-01   .6217138E-01   .6790800E-01   .7142689E-01
   .7294054E-01   .7179586E-01   .6643616E-01   .5588519E-01   .4029809E-01
   .2180186E-01   .5518362E-02  -.3650180E-02  -.6370326E-02  -.7688956E-02
  -.1094222E-01  -.1680553E-01  -.2635650E-01  -.3928025E-01  -.5047258E-01
  -.5373585E-01  -.4840082E-01  -.3904089E-01  -.3035634E-01  -.2463820E-01
  -.2215988E-01  -.2104388E-01  -.1813975E-01  -.1142884E-01  -.1563671E-02
   .7818994E-02   .1111806E-01   .4503656E-02  -.9774814E-02  -.2505195E-01
  -.3656365E-01  -.4289434E-01  -.4243819E-01  -.3453614E-01  -.2429585E-01
  -.1993013E-01  -.2286317E-01  -.2440267E-01  -.1529749E-01   .3365453E-02
   .2155135E-01   .3111970E-01   .3292599E-01   .3319495E-01   .3515900E-01
   .3636620E-01   .3408680E-01   .3002588E-01   .2808820E-01   .3026668E-01
   .3619491E-01   .4444454E-01   .5290044E-01   .5981815E-01   .6592169E-01
   .7417492E-01   .8653672E-01   .1003612E+00   .1092624E+00   .1098226E+00
   .1059695E+00   .1038046E+00   .1051879E+00   .1091846E+00   .1143350E+00
   .1170283E+00   .1128649E+00   .1014317E+00   .8566037E-01   .6628903E-01
   .4309347E-01   .2091541E-01   .6430381E-02  -.1438660E-02  -.1104621E-01
  -.2707805E-01  -.4489183E-01  -.5704220E-01  -.6161814E-01  -.6173291E-01
  -.5958462E-01  -.5414038E-01  -.4426546E-01  -.3297873E-01  -.2731522E-01
  -.3273752E-01  -.4744693E-01  -.6341902E-01  -.7278849E-01  -.7232116E-01
  -.6286149E-01  -.4748767E-01  -.3103470E-01  -.1850545E-01  -.1180505E-01
  -.9129439E-02  -.8246528E-02  -.9150471E-02  -.1431873E-01  -.2712104E-01
  -.4729275E-01  -.6770106E-01  -.7893421E-01  -.7855432E-01  -.7334299E-01
  -.7140985E-01  -.7423689E-01  -.7783685E-01  -.7896290E-01  -.7771642E-01
  -.7503174E-01  -.6958656E-01  -.5954959E-01  -.4741081E-01  -.3941570E-01
  -.3903155E-01  -.4441330E-01  -.5227190E-01  -.6021257E-01  -.6481273E-01
  -.6331969E-01  -.5860208E-01  -.5735930E-01  -.6162828E-01  -.6546333E-01
  -.6144267E-01  -.4788881E-01  -.2971214E-01  -.1418187E-01  -.5688216E-02
  -.2937007E-02  -.1145926E-02   .3015149E-02   .9585580E-02   .1731436E-01
   .2573891E-01   .3496008E-01   .4389857E-01   .5020534E-01   .5189579E-01
   .4897072E-01   .4356125E-01   .3871508E-01   .3705970E-01   .3976879E-01
   .4628702E-01   .5486441E-01   .6367151E-01   .7129354E-01   .7646797E-01
   .7802606E-01   .7597651E-01   .7284194E-01   .7225615E-01   .7533941E-01
   .8009925E-01   .8445895E-01   .8875356E-01   .9517116E-01   .1047704E+00
   .1152667E+00   .1223585E+00   .1235159E+00   .1197939E+00   .1138769E+00
   .1083491E+00   .1052419E+00   .1036017E+00   .9772098E-01   .8260106E-01
   .6089832E-01   .4044852E-01   .2624353E-01   .1810201E-01   .1437503E-01
   .1430206E-01   .1694843E-01   .2093254E-01   .2660428E-01   .3624589E-01
   .5091907E-01   .6876100E-01   .8699606E-01   .1040054E+00   .1179912E+00
   .1256372E+00   .1251761E+00   .1198370E+00   .1153663E+00   .1146918E+00
   .1168967E+00   .1204170E+00   .1245267E+00   .1276753E+00   .1270508E+00
   .1215380E+00   .1146666E+00   .1112852E+00   .1103158E+00   .1045685E+00
   .9037463E-01   .7293044E-01   .5909425E-01   .4990746E-01   .4229705E-01
   .3307413E-01   .1984605E-01   .2378503E-02  -.1545517E-01  -.2868629E-01
  -.3579336E-01  -.3856039E-01  -.4017699E-01  -.4389109E-01  -.5034599E-01
  -.5662426E-01  -.6008971E-01  -.6198211E-01  -.6489904E-01  -.6914658E-01
  -.7400142E-01  -.7943250E-01  -.8400793E-01  -.8456143E-01  -.8001118E-01
  -.7234625E-01  -.6341861E-01  -.5408973E-01  -.4577326E-01  -.3990250E-01
  -.3614367E-01  -.3246328E-01  -.2709020E-01  -.1965175E-01  -.1085780E-01
  -.2111728E-02   .5031046E-02   .9417693E-02   .9932107E-02   .5951051E-02
  -.7605294E-03  -.6717850E-02  -.9774005E-02  -.1001917E-01  -.8285746E-02
  -.5496767E-02  -.2665971E-02  -.7585597E-03  -.4896493E-03  -.2753304E-02
  -.9191907E-02  -.2063996E-01  -.3479844E-01  -.4697041E-01  -.5324211E-01
  -.5356247E-01  -.5160486E-01  -.5110768E-01  -.5203317E-01  -.5067911E-01
  -.4401426E-01  -.3308355E-01  -.2232994E-01  -.1697509E-01  -.2005627E-01
  -.2983987E-01  -.4036693E-01  -.4584405E-01  -.4492783E-01  -.4097461E-01
  -.3839704E-01  -.3854785E-01  -.3950610E-01  -.3986978E-01  -.4053495E-01
  -.4214561E-01  -.4383361E-01  -.4572993E-01  -.4927452E-01  -.5318738E-01
  -.5262185E-01  -.4525267E-01  -.3582173E-01  -.3071044E-01  -.3054597E-01
  -.3180671E-01  -.3243016E-01  -.3162510E-01  -.2699830E-01  -.1677410E-01
  -.3948068E-02   .5143523E-02   .5776124E-02  -.2292987E-02  -.1603048E-01
  -.3199260E-01  -.4770692E-01  -.6102246E-01  -.6880433E-01  -.6852029E-01
  -.6110973E-01  -.5118378E-01  -.4351127E-01  -.3920651E-01  -.3631089E-01
  -.3307780E-01  -.2899967E-01  -.2296305E-01  -.1394194E-01  -.5940040E-02
  -.7556250E-02  -.2134008E-01  -.3666078E-01  -.3773228E-01  -.1884951E-01
   .8908379E-02   .2641773E-01   .2334183E-01   .5990556E-02  -.1282609E-01
  -.2663388E-01  -.3436255E-01  -.3366986E-01  -.2402288E-01  -.1244377E-01
  -.8041225E-02  -.1232673E-01  -.1988186E-01  -.2583299E-01  -.2927586E-01
  -.3199159E-01  -.3609433E-01  -.4185674E-01  -.4715749E-01  -.5036429E-01
  -.5191363E-01  -.5155186E-01  -.4680885E-01  -.3711009E-01  -.2713125E-01
  -.2303936E-01  -.2640936E-01  -.3289269E-01  -.3632740E-01  -.3376585E-01
  -.2651030E-01  -.1710304E-01  -.6996736E-02   .2409488E-02   .9319166E-02
   .1335280E-01   .1559236E-01   .1655487E-01   .1680075E-01   .1828223E-01
   .2176454E-01   .2460958E-01   .2466140E-01   .2403203E-01   .2609208E-01
   .3107225E-01   .3655437E-01   .3995331E-01   .3977172E-01   .3647533E-01
   .3187116E-01   .2724892E-01   .2390148E-01   .2523875E-01   .3510936E-01
   .5286728E-01   .7250442E-01   .8868414E-01   .1004138E+00   .1074691E+00
   .1080541E+00   .1024146E+00   .9470501E-01   .8922036E-01   .8715227E-01
   .8815086E-01   .9224824E-01   .9905182E-01   .1074163E+00   .1158360E+00
   .1220530E+00   .1234761E+00   .1194899E+00   .1119696E+00   .1030531E+00
   .9384750E-01   .8505578E-01   .7718582E-01   .7015729E-01   .6421355E-01
   .6101687E-01   .6162291E-01   .6413027E-01   .6549060E-01   .6555615E-01
   .6654284E-01   .6903935E-01   .7137652E-01   .7262473E-01   .7330519E-01
   .7311756E-01   .7033865E-01   .6370627E-01   .5400369E-01   .4346600E-01
   .3386769E-01   .2505559E-01   .1593028E-01   .5621598E-02  -.7006311E-02
  -.2324278E-01  -.4266306E-01  -.6196482E-01  -.7637604E-01  -.8323568E-01
  -.8359584E-01  -.7992512E-01  -.7425264E-01  -.6842937E-01  -.6372681E-01
  -.5840306E-01  -.4868224E-01  -.3412744E-01  -.2063226E-01  -.1628652E-01
  -.2444741E-01  -.4248199E-01  -.6547418E-01  -.8836454E-01  -.1061954E+00
  -.1169901E+00  -.1242095E+00  -.1330502E+00  -.1448075E+00  -.1567859E+00
  -.1651394E+00  -.1663826E+00  -.1598248E+00  -.1498666E+00  -.1423770E+00
  -.1387822E+00  -.1366975E+00  -.1341666E+00  -.1303006E+00  -.1245945E+00
  -.1179814E+00  -.1118345E+00  -.1053824E+00  -.9725532E-01  -.8877768E-01
  -.8233795E-01  -.7747385E-01  -.7062305E-01  -.5811700E-01  -.3899889E-01
  -.1747797E-01  -.1213146E-02   .5470212E-02   .4563338E-02  -.4494843E-04
  -.5894353E-02  -.1089848E-01  -.1509616E-01  -.2239492E-01  -.3335695E-01
  -.3980272E-01  -.3485013E-01  -.2455735E-01  -.2028526E-01  -.2350173E-01
  -.2737352E-01  -.2890352E-01  -.2984487E-01  -.2865871E-01  -.2008439E-01
  -.2147678E-02   .2102805E-01   .4186940E-01   .5081424E-01   .3825341E-01
   .1336591E-02  -.5056997E-01  -.1008528E+00  -.1373984E+00  -.1575270E+00
  -.1614868E+00  -.1453269E+00  -.1019371E+00  -.2870795E-01   .6332578E-01
   .1486004E+00   .1998425E+00   .2032889E+00   .1624927E+00   .9363241E-01
   .2000915E-01  -.3672531E-01  -.6422932E-01  -.5756828E-01  -.1961874E-01
   .2704776E-01   .4363604E-01   .1181624E-01  -.4107245E-01  -.7243531E-01
  -.7206162E-01  -.6365960E-01  -.6769550E-01  -.8033251E-01  -.8736048E-01
  -.8468433E-01  -.8002258E-01  -.7988507E-01  -.8191982E-01  -.8215523E-01
  -.8530500E-01  -.1020473E+00  -.1355015E+00  -.1755532E+00  -.2090658E+00
  -.2288166E+00  -.2294453E+00  -.2036206E+00  -.1523842E+00  -.9518560E-01
  -.5702895E-01  -.4568615E-01  -.5028184E-01  -.6012695E-01  -.7515039E-01
  -.9864508E-01  -.1260039E+00  -.1401252E+00  -.1191810E+00  -.5924463E-01
   .8717116E-02   .4164840E-01   .3195338E-01   .1436674E-01   .1890883E-01
   .3939022E-01   .5721010E-01   .7071960E-01   .8694272E-01   .1043409E+00
   .1178884E+00   .1288468E+00   .1389078E+00   .1434951E+00   .1389968E+00
   .1308620E+00   .1283657E+00   .1331864E+00   .1374643E+00   .1342702E+00
   .1269916E+00   .1240331E+00   .1275484E+00   .1339845E+00   .1427905E+00
   .1553156E+00   .1663166E+00   .1659754E+00   .1519180E+00   .1321242E+00
   .1144736E+00   .9971171E-01   .8599369E-01   .7539917E-01   .7379814E-01
   .8422843E-01   .1008632E+00   .1130526E+00   .1163487E+00   .1160622E+00
   .1192597E+00   .1269197E+00   .1359158E+00   .1453140E+00   .1575087E+00
   .1754549E+00   .1985313E+00   .2192763E+00   .2287689E+00   .2280970E+00
   .2284723E+00   .2365657E+00   .2478498E+00   .2556689E+00   .2585410E+00
   .2570222E+00   .2510886E+00   .2432345E+00   .2393348E+00   .2429788E+00
   .2505292E+00   .2535199E+00   .2461811E+00   .2296023E+00   .2075803E+00
   .1800112E+00   .1449430E+00   .1062132E+00   .7318725E-01   .5097314E-01
   .3537119E-01   .1945319E-01   .2980303E-02  -.7839257E-02  -.1033226E-01
  -.9527158E-02  -.8967415E-02  -.4438672E-02   .6969308E-02   .1911149E-01
   .2248067E-01   .1388588E-01  -.9556328E-04  -.7926446E-02  -.3449904E-02
   .6733624E-02   .8957204E-02  -.2951942E-02  -.2157236E-01  -.3523603E-01
  -.3914396E-01  -.3569346E-01  -.2976425E-01  -.2663922E-01  -.2836873E-01
  -.3036465E-01  -.2733479E-01  -.2233745E-01  -.2350289E-01  -.3339062E-01
  -.4756251E-01  -.6159283E-01  -.7488037E-01  -.8823924E-01  -.1013462E+00
  -.1128933E+00  -.1222486E+00  -.1307724E+00  -.1403001E+00  -.1506387E+00
  -.1598872E+00  -.1668943E+00  -.1714530E+00  -.1723838E+00  -.1679169E+00
  -.1579924E+00  -.1448146E+00  -.1318592E+00  -.1230176E+00  -.1203232E+00
  -.1212338E+00  -.1208752E+00  -.1178030E+00  -.1146497E+00  -.1137908E+00
  -.1149124E+00  -.1154566E+00  -.1122693E+00  -.1042850E+00  -.9357482E-01
  -.8109682E-01  -.6305446E-01  -.3598438E-01  -.3678079E-02   .2489096E-01
   .4286354E-01   .4834399E-01   .4343729E-01   .3266983E-01   .2107349E-01
   .1259829E-01   .9425014E-02   .1153348E-01   .1691742E-01   .2282464E-01
   .2628366E-01   .2368306E-01   .1250412E-01  -.5717837E-02  -.2608322E-01
  -.4363181E-01  -.5492220E-01  -.5908546E-01  -.6026379E-01  -.6634031E-01
  -.8158188E-01  -.1018942E+00  -.1182066E+00  -.1224221E+00  -.1117284E+00
  -.9078905E-01  -.7012600E-01  -.5946636E-01  -.6124337E-01  -.7097610E-01
  -.8216938E-01  -.8800056E-01  -.8210623E-01  -.6343295E-01  -.4048185E-01
  -.2728873E-01  -.3295305E-01  -.5561329E-01  -.8616403E-01  -.1141492E+00
  -.1303172E+00  -.1297929E+00  -.1168610E+00  -.1019804E+00  -.9125392E-01
  -.8397004E-01  -.8085102E-01  -.8633792E-01  -.1005460E+00  -.1160523E+00
  -.1257928E+00  -.1287784E+00  -.1269976E+00  -.1220618E+00  -.1160772E+00
  -.1117568E+00  -.1088261E+00  -.1031804E+00  -.9241545E-01  -.8010311E-01
  -.7191918E-01  -.6820237E-01  -.6353265E-01  -.5559115E-01  -.5009551E-01
  -.5320337E-01  -.6430092E-01  -.7810697E-01  -.8835263E-01  -.8897093E-01
  -.7771964E-01  -.6028705E-01  -.4734414E-01  -.4709619E-01  -.6042556E-01
  -.7937922E-01  -.9089965E-01  -.8703393E-01  -.7251954E-01  -.5828897E-01
  -.4958046E-01  -.4501672E-01  -.4349903E-01  -.4432234E-01  -.4426087E-01
  -.4240441E-01  -.4360261E-01  -.5046832E-01  -.5794193E-01  -.6110183E-01
  -.6051546E-01  -.5617419E-01  -.4584422E-01  -.3253202E-01  -.2399367E-01
  -.2151271E-01  -.1801024E-01  -.8595060E-02   .4824548E-02   .1878295E-01
   .3145910E-01   .4048609E-01   .4328459E-01   .3993059E-01   .3413803E-01
   .3182127E-01   .3694279E-01   .4812544E-01   .6086434E-01   .7232251E-01
   .8056532E-01   .8106987E-01   .7087557E-01   .5578069E-01   .4668039E-01
   .4803942E-01   .5500567E-01   .6125464E-01   .6475707E-01   .6553132E-01
   .6269084E-01   .5502233E-01   .4184372E-01   .2360122E-01   .3860631E-02
  -.1122310E-01  -.1878342E-01  -.2295353E-01  -.3058855E-01  -.4463118E-01
  -.6255323E-01  -.7926809E-01  -.9088058E-01  -.9718402E-01  -.1013694E+00
  -.1060522E+00  -.1095481E+00  -.1081895E+00  -.1015739E+00  -.9312583E-01
  -.8632666E-01  -.8297438E-01  -.8359582E-01  -.8715341E-01  -.9010906E-01
  -.8813905E-01  -.8035010E-01  -.7059402E-01  -.6353620E-01  -.6001083E-01
  -.5718286E-01  -.5246179E-01  -.4675587E-01  -.4442931E-01  -.4955880E-01
  -.6117286E-01  -.7257647E-01  -.7638224E-01  -.6947879E-01  -.5313572E-01
  -.3075853E-01  -.7138384E-02   .1222271E-01   .2349294E-01   .2621181E-01
   .2315772E-01   .2010890E-01   .2329517E-01   .3516435E-01   .5273286E-01
   .7106043E-01   .8742460E-01   .1012175E+00   .1118473E+00   .1184385E+00
   .1205942E+00   .1185226E+00   .1126005E+00   .1041426E+00   .9493947E-01
   .8562204E-01   .7573284E-01   .6586818E-01   .5819123E-01   .5398285E-01
   .5275126E-01   .5401515E-01   .5784673E-01   .6358693E-01   .6893111E-01
   .7021932E-01   .6464364E-01   .5383129E-01   .4457531E-01   .4333445E-01
   .5002818E-01   .5900671E-01   .6553216E-01   .6884985E-01   .7026318E-01
   .7025535E-01   .6714447E-01   .5913928E-01   .4830411E-01   .4052141E-01
   .4001817E-01   .4436696E-01   .4738902E-01   .4614595E-01   .4191240E-01
   .3577404E-01   .2775829E-01   .1981949E-01   .1460143E-01   .1097328E-01
   .4397203E-02  -.7996499E-02  -.2416976E-01  -.3907790E-01  -.4942222E-01
  -.5600989E-01  -.6170157E-01  -.6744941E-01  -.7147436E-01  -.7173348E-01
  -.6748195E-01  -.5989788E-01  -.5303582E-01  -.5269251E-01  -.6250292E-01
  -.8126796E-01  -.1034815E+00  -.1221112E+00  -.1324081E+00  -.1330842E+00
  -.1249314E+00  -.1098915E+00  -.9144994E-01  -.7462629E-01  -.6313054E-01
  -.5670055E-01  -.5282135E-01  -.5002628E-01  -.4777349E-01  -.4431219E-01
  -.3727564E-01  -.2621437E-01  -.1290329E-01   .1271107E-02   .1703711E-01
   .3575408E-01   .5704294E-01   .7870952E-01   .9839405E-01   .1144327E+00
   .1260457E+00   .1334280E+00   .1378014E+00   .1414257E+00   .1466400E+00
   .1543502E+00   .1625531E+00   .1662032E+00   .1603510E+00   .1450363E+00
   .1269749E+00   .1152034E+00   .1139868E+00   .1206529E+00   .1304075E+00
   .1398752E+00   .1454165E+00   .1421946E+00   .1288667E+00   .1107691E+00
   .9501146E-01   .8435391E-01   .7821495E-01   .7622561E-01   .7775536E-01
   .8055487E-01   .8179976E-01   .7907997E-01   .7093403E-01   .5858185E-01
   .4570003E-01   .3581846E-01   .3095993E-01   .3194824E-01   .3765852E-01
   .4337525E-01   .4159217E-01   .2512838E-01  -.7401006E-02  -.4634659E-01
  -.7476245E-01  -.8166713E-01  -.6959763E-01  -.4704779E-01  -.1876508E-01
   .1202424E-01   .3725232E-01   .4718747E-01   .3974963E-01   .2229851E-01
   .4604879E-02  -.7334653E-02  -.1091328E-01  -.4600722E-02   .1056247E-01
   .2913693E-01   .4425628E-01   .5335249E-01   .5804870E-01   .5834334E-01
   .5049368E-01   .3236422E-01   .7669869E-02  -.1765305E-01  -.4009582E-01
  -.5706607E-01  -.6409982E-01  -.5808913E-01  -.4219644E-01  -.2505768E-01
  -.1554117E-01  -.1993018E-01  -.3993453E-01  -.6731559E-01  -.8415368E-01
  -.7655651E-01  -.4815646E-01  -.1551552E-01   .8092296E-02   .2071554E-01
   .2567253E-01   .2492098E-01   .2172134E-01   .2278166E-01   .2990973E-01
   .3408118E-01   .2627352E-01   .1052846E-01  -.2351830E-02  -.9639760E-02
  -.1588733E-01  -.2114264E-01  -.1957997E-01  -.9530052E-02   .2366172E-02
   .8688945E-02   .8551755E-02   .5595145E-02   .2070074E-02  -.1900698E-02
  -.5323385E-02  -.5966393E-02  -.2619034E-02   .3650247E-02   .1055321E-01
   .1618783E-01   .2022698E-01   .2406605E-01   .2913110E-01   .3556685E-01
   .4279430E-01   .5053229E-01   .5912322E-01   .6924719E-01   .8089658E-01
   .9286688E-01   .1032028E+00   .1097917E+00   .1105830E+00   .1045362E+00
   .9347029E-01   .8200367E-01   .7489737E-01   .7432519E-01   .7915162E-01
   .8622485E-01   .9124470E-01   .8988353E-01   .7955595E-01   .6057068E-01
   .3622363E-01   .1124176E-01  -.9872363E-02  -.2418922E-01  -.3181349E-01
  -.3579658E-01  -.3967620E-01  -.4501981E-01  -.5147778E-01  -.5803464E-01
  -.6330103E-01  -.6546866E-01  -.6352228E-01  -.5891026E-01  -.5513562E-01
  -.5490977E-01  -.5751999E-01  -.5948252E-01  -.5793378E-01  -.5194559E-01
  -.4126992E-01  -.2624816E-01  -.9733151E-02   .2860970E-02   .7008827E-02
   .2173200E-02  -.9380823E-02  -.2481351E-01  -.3935125E-01  -.4573112E-01
  -.3938003E-01  -.2382283E-01  -.8471368E-02  -.8048764E-03  -.2314746E-02
  -.1120688E-01  -.2557735E-01  -.4288518E-01  -.5874807E-01  -.6846063E-01
  -.6887336E-01  -.5955802E-01  -.4459977E-01  -.3133947E-01  -.2531244E-01
  -.2699866E-01  -.3305568E-01  -.3864549E-01  -.3834536E-01  -.2900027E-01
  -.1350894E-01   .1327496E-02   .1214931E-01   .2026208E-01   .2596763E-01
   .2743378E-01   .2512192E-01   .2283372E-01   .2373331E-01   .2777735E-01
   .3293496E-01   .3716590E-01   .3950440E-01   .4064214E-01   .4230130E-01
   .4585241E-01   .5243290E-01   .6378778E-01   .8070097E-01   .1004532E+00
   .1177769E+00   .1286683E+00   .1328631E+00   .1324134E+00   .1285896E+00
   .1222377E+00   .1152076E+00   .1092313E+00   .1041444E+00   .9839190E-01
   .9150420E-01   .8452979E-01   .7826520E-01   .7277641E-01   .6784423E-01
   .6283725E-01   .5631885E-01   .4661441E-01   .3308358E-01   .1675646E-01
  -.5065242E-03  -.1759563E-01  -.3427451E-01  -.5028175E-01  -.6495696E-01
  -.7696360E-01  -.8408201E-01  -.8425193E-01  -.7819879E-01  -.6995861E-01
  -.6288067E-01  -.5687578E-01  -.5056079E-01  -.4400022E-01  -.3824979E-01
  -.3351183E-01  -.2938307E-01  -.2617894E-01  -.2477684E-01  -.2523555E-01
  -.2538897E-01  -.2185384E-01  -.1378464E-01  -.3687621E-02   .6909285E-02
   .2021862E-01   .3744794E-01   .5415371E-01   .6318378E-01   .6061626E-01
   .4823732E-01   .3157420E-01   .1648638E-01   .6885330E-02   .4524268E-02
   .7858592E-02   .1137362E-01   .1060602E-01   .8004672E-02   .9085401E-02
   .1329881E-01   .1438713E-01   .8993434E-02  -.5736077E-03  -.1127970E-01
  -.2158702E-01  -.2972215E-01  -.3443552E-01  -.3647968E-01  -.3708708E-01
  -.3677312E-01  -.3671886E-01  -.3794767E-01  -.3791712E-01  -.3211058E-01
  -.2043146E-01  -.7879974E-02   .2640876E-02   .1395726E-01   .2944768E-01
   .4631169E-01   .5725466E-01   .5793780E-01   .5039824E-01   .3924478E-01
   .2742706E-01   .1678741E-01   .8974863E-02   .3697977E-02  -.1701010E-02
  -.8947443E-02  -.1645741E-01  -.2129304E-01  -.2245226E-01  -.2145623E-01
  -.2067204E-01  -.2146653E-01  -.2324766E-01  -.2441788E-01  -.2443802E-01
  -.2371582E-01  -.2174786E-01  -.1786008E-01  -.1334281E-01  -.1043730E-01
  -.9118858E-02  -.7048154E-02  -.3497260E-02  -.7020023E-03  -.7899186E-03
  -.2773738E-02  -.3188267E-02   .2742435E-03   .6520171E-02   .1196790E-01
   .1281776E-01   .6729733E-02  -.6329787E-02  -.2337510E-01  -.3939820E-01
  -.5005825E-01  -.5398631E-01  -.5304151E-01  -.5040815E-01  -.4841759E-01
  -.4788859E-01  -.4893569E-01  -.5186438E-01  -.5707322E-01  -.6447920E-01
  -.7336349E-01  -.8268292E-01  -.9121127E-01  -.9763191E-01  -.1013500E+00
  -.1024647E+00  -.1006453E+00  -.9477523E-01  -.8386658E-01  -.6853636E-01
  -.5111159E-01  -.3397841E-01  -.1857652E-01  -.5801036E-02   .3870506E-02
   .1133248E-01   .1878691E-01   .2709181E-01   .3350843E-01   .3386032E-01
   .2701305E-01   .1587383E-01   .3799336E-02  -.7789761E-02  -.1792926E-01
  -.2447514E-01  -.2564823E-01  -.2253271E-01  -.1819033E-01  -.1429318E-01
  -.1038412E-01  -.6087493E-02  -.2446156E-02  -.6914441E-03  -.4394351E-03
  -.7969819E-04   .1734309E-02   .5404175E-02   .1019321E-01   .1458694E-01
   .1747001E-01   .1913748E-01   .2023043E-01   .2036857E-01   .1849046E-01
   .1466595E-01   .1051118E-01   .7657079E-02   .6836978E-02   .8143295E-02
   .1111559E-01   .1490973E-01   .1929349E-01   .2440842E-01   .2965129E-01
   .3333086E-01   .3367484E-01   .3019655E-01   .2451208E-01   .2029361E-01
   .2137949E-01   .2763923E-01   .3361972E-01   .3389735E-01   .2856633E-01
   .2134211E-01   .1432681E-01   .7601274E-02   .2261482E-02   .1310947E-03
   .1001605E-02   .2985124E-02   .5227245E-02   .8819925E-02   .1460031E-01
   .2095345E-01   .2515264E-01   .2623217E-01   .2504003E-01   .2177151E-01
   .1535206E-01   .5653859E-02  -.5097529E-02  -.1347251E-01  -.1729406E-01
  -.1725193E-01  -.1629574E-01  -.1732178E-01  -.2167485E-01  -.2865942E-01
  -.3630581E-01  -.4300826E-01  -.4856585E-01  -.5408330E-01  -.6083933E-01
  -.6878277E-01  -.7586795E-01  -.7932241E-01  -.7779188E-01  -.7202582E-01
  -.6350357E-01  -.5342017E-01  -.4271249E-01  -.3253534E-01  -.2440107E-01
  -.1926906E-01  -.1646401E-01  -.1452695E-01  -.1288191E-01  -.1205360E-01
  -.1214932E-01  -.1205059E-01  -.1099073E-01  -.9646093E-02  -.9125369E-02
  -.1002717E-01  -.1204717E-01  -.1392968E-01  -.1423053E-01  -.1243250E-01
  -.9446265E-02  -.6793024E-02  -.4977033E-02  -.2688240E-02   .2047662E-02
   .9732827E-02   .1903662E-01   .2808737E-01   .3575265E-01   .4158716E-01
   .4485850E-01   .4464398E-01   .4075158E-01   .3423605E-01   .2758824E-01
   .2393359E-01   .2501157E-01   .2955445E-01   .3422245E-01   .3666691E-01
   .3730200E-01   .3798135E-01   .3985896E-01   .4310993E-01   .4758803E-01
   .5267416E-01   .5674152E-01   .5786143E-01   .5548881E-01   .5109077E-01
   .4697607E-01   .4468570E-01   .4407908E-01   .4357850E-01   .4178540E-01
   .3916544E-01   .3741986E-01   .3727093E-01   .3750912E-01   .3639900E-01
   .3343449E-01   .2926333E-01   .2479851E-01   .2112056E-01   .1959243E-01
   .2104857E-01   .2462370E-01   .2805888E-01   .2945542E-01   .2812313E-01
   .2371718E-01   .1619733E-01   .7089606E-02  -.8191502E-03  -.6006502E-02
  -.9974314E-02  -.1567862E-01  -.2492948E-01  -.3712217E-01  -.4998659E-01
  -.6109862E-01  -.6857759E-01  -.7141823E-01  -.6969070E-01  -.6435060E-01
  -.5620244E-01  -.4510058E-01  -.3049942E-01  -.1273975E-01   .6775043E-02
   .2575478E-01   .4153704E-01   .5149976E-01   .5311184E-01   .4520516E-01
   .3043714E-01   .1574991E-01   .8359780E-02   .1083146E-01   .2005048E-01
   .3042074E-01   .3754520E-01   .4032213E-01   .4031607E-01   .3862971E-01
   .3385113E-01   .2416927E-01   .1096155E-01  -.7726480E-03  -.5923291E-02
  -.3281873E-02   .3090300E-02   .7127726E-02   .5849055E-02   .7795324E-03
  -.4607797E-02  -.7506574E-02  -.6380164E-02  -.1330074E-02   .5097993E-02
   .9456732E-02   .1040035E-01   .9027869E-02   .6628895E-02   .3684908E-02
   .1027030E-02  -.4296296E-03  -.1010787E-02  -.1550252E-02  -.2090159E-02
  -.2321583E-02  -.2366063E-02  -.2673014E-02  -.3452858E-02  -.4320558E-02
  -.4171116E-02  -.2063472E-02   .1056015E-02   .2470447E-02   .3388564E-03
  -.4050117E-02  -.7090194E-02  -.5827489E-02  -.6830516E-03   .4563722E-02
   .5721376E-02   .1713706E-02  -.4693169E-02  -.1033523E-01  -.1458352E-01
  -.1780896E-01  -.1945748E-01  -.1958075E-01  -.1997262E-01  -.2195535E-01
  -.2469574E-01  -.2655769E-01  -.2730342E-01  -.2756959E-01  -.2740374E-01
  -.2610030E-01  -.2294169E-01  -.1793328E-01  -.1172451E-01  -.4829855E-02
   .2593081E-02   .1035435E-01   .1778336E-01   .2363391E-01   .2688119E-01
   .2761995E-01   .2711788E-01   .2645002E-01   .2527816E-01   .2240644E-01
   .1733808E-01   .1127338E-01   .6438894E-02   .4699569E-02   .6657118E-02
   .1113781E-01   .1479642E-01   .1409636E-01   .8551919E-02   .1522212E-02
  -.2654863E-02  -.2396802E-02   .5750711E-03   .3521501E-02   .4794420E-02
   .4167681E-02   .1891151E-02  -.1657999E-02  -.6067755E-02  -.1145342E-01
  -.1853176E-01  -.2721814E-01  -.3554294E-01  -.4110064E-01  -.4365930E-01
  -.4522106E-01  -.4776448E-01  -.5133259E-01  -.5444120E-01  -.5564948E-01
  -.5438103E-01  -.5125870E-01  -.4820051E-01  -.4752358E-01  -.5022661E-01
  -.5492946E-01  -.5900239E-01  -.6063663E-01  -.5869641E-01  -.5182801E-01
  -.3985935E-01  -.2569548E-01  -.1367567E-01  -.6451934E-02  -.4026078E-02
  -.4302879E-02  -.4273026E-02  -.1395694E-02   .5172089E-02   .1430695E-01
   .2368834E-01   .3043529E-01   .3253705E-01   .2990844E-01   .2401178E-01
   .1749015E-01   .1360075E-01   .1472040E-01   .2041113E-01   .2801930E-01
   .3523942E-01   .4076205E-01   .4349843E-01   .4375191E-01   .4380438E-01
   .4561122E-01   .4881232E-01   .5213108E-01   .5513105E-01   .5785829E-01
   .6028450E-01   .6231060E-01   .6424482E-01   .6619411E-01   .6757713E-01
   .6792398E-01   .6752452E-01   .6687143E-01   .6601332E-01   .6459999E-01
   .6240675E-01   .5954458E-01   .5652708E-01   .5430276E-01   .5386013E-01
   .5537214E-01   .5800235E-01   .6075317E-01   .6334353E-01   .6617515E-01
   .6953348E-01   .7322531E-01   .7670311E-01   .7913542E-01   .7970525E-01
   .7820544E-01   .7548861E-01   .7358526E-01   .7459655E-01   .7881430E-01
   .8439964E-01   .8886939E-01   .9131164E-01   .9332679E-01   .9753636E-01
   .1048962E+00   .1133758E+00   .1196283E+00   .1215107E+00   .1193208E+00
   .1150793E+00   .1112318E+00   .1092887E+00   .1087775E+00   .1071932E+00
   .1008900E+00   .8689517E-01   .6530068E-01   .4039785E-01   .1858118E-01
   .3270912E-02  -.8202295E-02  -.2100156E-01  -.3565976E-01  -.4773900E-01
  -.5482266E-01  -.5865684E-01  -.6003672E-01  -.5819186E-01  -.5536500E-01
  -.5556769E-01  -.5824548E-01  -.5902082E-01  -.5683083E-01  -.5467599E-01
  -.5353686E-01  -.5105728E-01  -.4637978E-01  -.4181057E-01  -.3931759E-01
  -.3872280E-01  -.3990873E-01  -.4309487E-01  -.4670661E-01  -.4856705E-01
  -.4840325E-01  -.4653612E-01  -.4180417E-01  -.3395819E-01  -.2641332E-01
  -.2327700E-01  -.2456974E-01  -.2675885E-01  -.2742820E-01  -.2731181E-01
  -.2823006E-01  -.3036891E-01  -.3192921E-01  -.3075950E-01  -.2671975E-01
  -.2246085E-01  -.2022841E-01  -.1788154E-01  -.1100710E-01  -.5326880E-03
   .6396687E-02   .4882660E-02  -.1330053E-02  -.4853273E-02  -.3657383E-02
  -.1819745E-02  -.3235166E-02  -.8071000E-02  -.1447763E-01  -.2069528E-01
  -.2554521E-01  -.2891429E-01  -.3165911E-01  -.3453701E-01  -.3759875E-01
  -.4027044E-01  -.4173578E-01  -.4091337E-01  -.3744684E-01  -.3288343E-01
  -.2952385E-01  -.2792923E-01  -.2668514E-01  -.2499571E-01  -.2346859E-01
  -.2295289E-01  -.2400477E-01  -.2697537E-01  -.3106490E-01  -.3373933E-01
  -.3226608E-01  -.2677332E-01  -.2076442E-01  -.1826966E-01  -.2064720E-01
  -.2614062E-01  -.3233219E-01  -.3808383E-01  -.4266604E-01  -.4500274E-01
  -.4478449E-01  -.4337366E-01  -.4305316E-01  -.4465772E-01  -.4691119E-01
  -.4807654E-01  -.4788211E-01  -.4725269E-01  -.4638755E-01  -.4426971E-01
  -.4037344E-01  -.3648291E-01  -.3544180E-01  -.3816138E-01  -.4370316E-01
  -.5117701E-01  -.5964969E-01  -.6731406E-01  -.7291433E-01  -.7783753E-01
  -.8432688E-01  -.9233886E-01  -.9967040E-01  -.1041220E+00  -.1040732E+00
  -.9895946E-01  -.9070910E-01  -.8355218E-01  -.8066287E-01  -.8142892E-01
  -.8291881E-01  -.8267317E-01  -.7963921E-01  -.7317121E-01  -.6239284E-01
  -.4695452E-01  -.2769161E-01  -.6735508E-02   .1316362E-01   .2936928E-01
   .4028914E-01   .4668941E-01   .5149373E-01   .5678528E-01   .6152075E-01
   .6335725E-01   .6131315E-01   .5513415E-01   .4404727E-01   .2820004E-01
   .1002030E-01  -.8041396E-02  -.2595723E-01  -.4416793E-01  -.6077589E-01
  -.7330404E-01  -.8145525E-01  -.8615638E-01  -.8687962E-01  -.8257049E-01
  -.7477643E-01  -.6702659E-01  -.6116895E-01  -.5621848E-01  -.5090791E-01
  -.4548374E-01  -.4034438E-01  -.3413132E-01  -.2513268E-01  -.1405537E-01
  -.3815897E-02   .2892291E-02   .5291545E-02   .4126869E-02  -.2690278E-03
  -.8055236E-02  -.1646999E-01  -.2001781E-01  -.1814148E-01  -.1834102E-01
  -.2614173E-01  -.3666136E-01  -.4247747E-01  -.4487663E-01  -.5014498E-01
  -.5826299E-01  -.6233395E-01  -.5859254E-01  -.5157080E-01  -.4789040E-01
  -.4787370E-01  -.4661475E-01  -.4146416E-01  -.3491686E-01  -.3005879E-01
  -.2586760E-01  -.1895501E-01  -.8581449E-02   .1779960E-02   .8612216E-02
   .1287175E-01   .1767517E-01   .2195399E-01   .2141201E-01   .1680885E-01
   .1495966E-01   .1967382E-01   .2666136E-01   .2922728E-01   .2493660E-01
   .1562577E-01   .4642931E-02  -.3874130E-02  -.5533987E-02   .1346215E-02
   .1387640E-01   .2658105E-01   .3516131E-01   .3854962E-01   .3803256E-01
   .3570055E-01   .3323127E-01   .3136492E-01   .3036687E-01   .3067646E-01
   .3268554E-01   .3530564E-01   .3599511E-01   .3405228E-01   .3187303E-01
   .3131962E-01   .3143516E-01   .3025875E-01   .2537402E-01   .1394354E-01
  -.3381682E-02  -.2043995E-01  -.3109882E-01  -.3560470E-01  -.3788133E-01
  -.3923761E-01  -.3888703E-01  -.3786086E-01  -.3771558E-01  -.3731550E-01
  -.3390096E-01  -.2677077E-01  -.1941626E-01  -.1755720E-01  -.2355183E-01
  -.3329354E-01  -.4057792E-01  -.4347355E-01  -.4385831E-01  -.4252248E-01
  -.3885924E-01  -.3404154E-01  -.3094566E-01  -.3087997E-01  -.3203933E-01
  -.3088317E-01  -.2450139E-01  -.1270515E-01   .2919100E-02   .2152978E-01
   .4296609E-01   .6512130E-01   .8363080E-01   .9536986E-01   .1004120E+00
   .1003712E+00   .9672728E-01   .9109497E-01   .8574233E-01   .8275935E-01
   .8266664E-01   .8395010E-01   .8477718E-01   .8466801E-01   .8443684E-01
   .8541343E-01   .8786470E-01   .9012901E-01   .8997340E-01   .8721903E-01
   .8500195E-01   .8713691E-01   .9451639E-01   .1050642E+00   .1160338E+00
   .1248172E+00   .1287642E+00   .1274706E+00   .1253765E+00   .1278945E+00
   .1332365E+00   .1324464E+00   .1200656E+00   .1008187E+00   .8262694E-01
   .6702101E-01   .5041566E-01   .3204544E-01   .1619582E-01   .5683774E-02
  -.2549628E-02  -.1293345E-01  -.2550503E-01  -.3728201E-01  -.4671950E-01
  -.5439772E-01  -.6141616E-01  -.6868534E-01  -.7663406E-01  -.8482066E-01
  -.9208814E-01  -.9727485E-01  -.9967162E-01  -.9900577E-01  -.9556332E-01
  -.9060925E-01  -.8608632E-01  -.8324060E-01  -.8124001E-01  -.7750505E-01
  -.7027634E-01  -.5993169E-01  -.4794803E-01  -.3560924E-01  -.2375476E-01
  -.1389766E-01  -.8156112E-02  -.6898049E-02  -.7322692E-02  -.5996069E-02
  -.2546229E-02   .1051154E-02   .2979522E-02   .1878654E-02  -.2191763E-02
  -.5586244E-02  -.4558911E-02  -.2355166E-02  -.7362917E-02  -.2132098E-01
  -.3452454E-01  -.3696610E-01  -.2991768E-01  -.2271484E-01  -.2208870E-01
  -.2880643E-01  -.4066816E-01  -.5443362E-01  -.6648437E-01  -.7404786E-01
  -.7588166E-01  -.7216064E-01  -.6474603E-01  -.5764503E-01  -.5544536E-01
  -.5971860E-01  -.6788719E-01  -.7695119E-01  -.8616338E-01  -.9498775E-01
  -.1012106E+00  -.1036619E+00  -.1047498E+00  -.1075925E+00  -.1126367E+00
  -.1186876E+00  -.1249336E+00  -.1301239E+00  -.1316004E+00  -.1272466E+00
  -.1172280E+00  -.1025727E+00  -.8342839E-01  -.6010750E-01  -.3460125E-01
  -.9620346E-02   .1319674E-01   .3320149E-01   .4962739E-01   .6080379E-01
   .6415581E-01   .5744980E-01   .4076629E-01   .1799927E-01  -.4020953E-02
  -.1929217E-01  -.2633053E-01  -.2813198E-01  -.2808639E-01  -.2700701E-01
  -.2429542E-01  -.2043400E-01  -.1657081E-01  -.1245409E-01  -.6847180E-02
  -.1401545E-03   .5532068E-02   .9245785E-02   .1203862E-01   .1411611E-01
   .1388523E-01   .1052017E-01   .5737145E-02   .2209783E-02   .1192966E-02
   .1784971E-02   .2097800E-02   .5776435E-03  -.3211436E-02  -.8757388E-02
  -.1521548E-01  -.2201448E-01  -.2927882E-01  -.3702307E-01  -.4394268E-01
  -.4825246E-01  -.4941070E-01  -.4786960E-01  -.4388577E-01  -.3828013E-01
  -.3348823E-01  -.3221378E-01  -.3552974E-01  -.4291979E-01  -.5289567E-01
  -.6286244E-01  -.6977625E-01  -.7248819E-01  -.7278527E-01  -.7364267E-01
  -.7646066E-01  -.8047623E-01  -.8419657E-01  -.8634401E-01  -.8655989E-01
  -.8547797E-01  -.8420278E-01  -.8340235E-01  -.8240222E-01  -.7910173E-01
  -.7111299E-01  -.5818716E-01  -.4323881E-01  -.3043694E-01  -.2296798E-01
  -.2267034E-01  -.2972382E-01  -.4096187E-01  -.4982159E-01  -.5084112E-01
  -.4403285E-01  -.3391532E-01  -.2518101E-01  -.2015427E-01  -.1905994E-01
  -.2021518E-01  -.2018340E-01  -.1550691E-01  -.5114143E-02   .8755722E-02
   .2188758E-01   .3146302E-01   .3850954E-01   .4580395E-01   .5439111E-01
   .6347753E-01   .7209197E-01   .7933580E-01   .8360725E-01   .8289621E-01
   .7602912E-01   .6371959E-01   .4953666E-01   .3884174E-01   .3483121E-01
   .3633933E-01   .3945849E-01   .4077860E-01   .3876983E-01   .3350545E-01
   .2636993E-01   .1942700E-01   .1468052E-01   .1360887E-01   .1636040E-01
   .2121342E-01   .2556841E-01   .2771421E-01   .2678167E-01   .2229055E-01
   .1561536E-01   .1008367E-01   .8354729E-02   .1055004E-01   .1487138E-01
   .1854368E-01   .1888176E-01   .1579146E-01   .1259462E-01   .1336718E-01
   .1929485E-01   .2794212E-01   .3572925E-01   .3955099E-01   .3723891E-01
   .2932170E-01   .1980198E-01   .1322295E-01   .1076563E-01   .1061540E-01
   .1112151E-01   .1175616E-01   .1197664E-01   .1104673E-01   .8438521E-02
   .4057026E-02  -.1525507E-02  -.6617407E-02  -.8653701E-02  -.6198385E-02
   .5068140E-03   .1054439E-01   .2225811E-01   .3304206E-01   .4039797E-01
   .4327267E-01   .4191755E-01   .3722169E-01   .3024678E-01   .2172619E-01
   .1193251E-01   .2040301E-02  -.5284742E-02  -.8271933E-02  -.7734409E-02
  -.5867007E-02  -.4645130E-02  -.5541193E-02  -.8737977E-02  -.1223471E-01
  -.1360109E-01  -.1235986E-01  -.9765630E-02  -.6960920E-02  -.3949391E-02
  -.4127163E-03   .3209785E-02   .6136710E-02   .7767653E-02   .8264742E-02
   .8699300E-02   .1024613E-01   .1338292E-01   .1801277E-01   .2335599E-01
   .2800936E-01   .3129875E-01   .3390338E-01   .3677589E-01   .3999738E-01
   .4307409E-01   .4599511E-01   .4950691E-01   .5413961E-01   .5926265E-01
   .6369810E-01   .6678027E-01   .6859671E-01   .6968312E-01   .7069243E-01
   .7171744E-01   .7152726E-01   .6831153E-01   .6158594E-01   .5267720E-01
   .4333668E-01   .3412917E-01   .2490146E-01   .1544595E-01   .4914394E-02
  -.7833481E-02  -.2260665E-01  -.3757512E-01  -.5016259E-01  -.5791627E-01
  -.5936843E-01  -.5462907E-01  -.4484441E-01  -.3189884E-01  -.1904599E-01
  -.1021470E-01  -.6710381E-02  -.4958730E-02   .6171277E-03   .1175316E-01
   .2527022E-01   .3779050E-01   .4846181E-01   .5651716E-01   .5976356E-01
   .5761035E-01   .5374112E-01   .5364338E-01   .5912939E-01   .6723391E-01
   .7402711E-01   .7757482E-01   .7828736E-01   .7735552E-01   .7514535E-01
   .7146924E-01   .6672365E-01   .6169803E-01   .5663878E-01   .5218923E-01
   .4993030E-01   .5032875E-01   .5134682E-01   .5066540E-01   .4807413E-01
   .4473536E-01   .4148221E-01   .3924778E-01   .3903778E-01   .4066697E-01
   .4279326E-01   .4405913E-01   .4375624E-01   .4149913E-01   .3707606E-01
   .3084906E-01   .2376772E-01   .1688846E-01   .1052969E-01   .3927817E-02
  -.3726872E-02  -.1184412E-01  -.1863306E-01  -.2343050E-01  -.2755383E-01
  -.3247430E-01  -.3798365E-01  -.4251256E-01  -.4438393E-01  -.4240457E-01
  -.3640632E-01  -.2769732E-01  -.1855712E-01  -.1165815E-01  -.8744388E-02
  -.9274938E-02  -.1096982E-01  -.1180745E-01  -.1144995E-01  -.1084270E-01
  -.1102663E-01  -.1303498E-01  -.1781364E-01  -.2445335E-01  -.2953423E-01
  -.2998150E-01  -.2614317E-01  -.2104862E-01  -.1730305E-01  -.1582125E-01
  -.1649926E-01  -.1834498E-01  -.1944233E-01  -.1765595E-01  -.1171178E-01
  -.2091911E-02   .8994668E-02   .1907384E-01   .2701057E-01   .3326173E-01
   .3895278E-01   .4502328E-01   .5180207E-01   .5926102E-01   .6702444E-01
   .7428892E-01   .8043524E-01   .8585053E-01   .9120529E-01   .9628436E-01
   .1001697E+00   .1028735E+00   .1059729E+00   .1105586E+00   .1155440E+00
   .1189867E+00   .1201680E+00   .1196844E+00   .1179598E+00   .1148289E+00
   .1106249E+00   .1062321E+00   .1015959E+00   .9560770E-01   .8775939E-01
   .7948836E-01   .7264835E-01   .6708000E-01   .6121604E-01   .5450878E-01
   .4767516E-01   .4050601E-01   .3165443E-01   .2097652E-01   .1013457E-01
   .8717476E-04  -.1015714E-01  -.2168747E-01  -.3449838E-01  -.4835603E-01
  -.6283121E-01  -.7650172E-01  -.8717628E-01  -.9315950E-01  -.9491842E-01
  -.9538275E-01  -.9789942E-01  -.1027826E+00  -.1069609E+00  -.1075482E+00
  -.1043795E+00  -.9895887E-01  -.9287578E-01  -.8757527E-01  -.8383659E-01
  -.8121444E-01  -.7884051E-01  -.7655588E-01  -.7450212E-01  -.7214665E-01
  -.6857987E-01  -.6390216E-01  -.5991398E-01  -.5856275E-01  -.5934768E-01
  -.5883692E-01  -.5430422E-01  -.4836292E-01  -.4804143E-01  -.5689718E-01
  -.7051998E-01  -.8117895E-01  -.8362427E-01  -.7502106E-01  -.5384102E-01
  -.2245774E-01   .1074046E-01   .3433925E-01   .4078561E-01   .3137682E-01
   .1539052E-01   .4589739E-02   .7043702E-02   .2360689E-01   .4781051E-01
   .7040219E-01   .8612043E-01   .9600249E-01   .1030168E+00   .1076404E+00
   .1099017E+00   .1123714E+00   .1175267E+00   .1238561E+00   .1273083E+00
   .1256291E+00   .1191772E+00   .1094108E+00   .9898784E-01   .9178925E-01
   .8995484E-01   .9148377E-01   .9293785E-01   .9280397E-01   .8983991E-01
   .8090027E-01   .6355162E-01   .3975340E-01   .1439820E-01  -.9375645E-02
  -.3105807E-01  -.4995520E-01  -.6454038E-01  -.7448748E-01  -.8131638E-01
  -.8670770E-01  -.9104426E-01  -.9368399E-01  -.9402679E-01  -.9188688E-01
  -.8714138E-01  -.7997610E-01  -.7141249E-01  -.6298409E-01  -.5530854E-01
  -.4668656E-01  -.3363463E-01  -.1340100E-01   .1360421E-01   .4389300E-01
   .7316198E-01   .9754978E-01   .1130824E+00   .1167306E+00   .1101053E+00
   .1005325E+00   .9568591E-01   .9678983E-01   .9891022E-01   .9922014E-01
   .1027447E+00   .1161803E+00   .1362223E+00   .1483551E+00   .1401485E+00
   .1133718E+00   .8007690E-01   .5034274E-01   .2818032E-01   .1589810E-01
   .1482446E-01   .2248652E-01   .3503195E-01   .4998326E-01   .6152621E-01
   .5865483E-01   .3677943E-01   .7287614E-02  -.1263037E-01  -.1650261E-01
  -.9981281E-02  -.1457206E-02   .3275657E-02   .2152871E-02  -.2167091E-02
  -.5082799E-02  -.5402072E-02  -.5330385E-02  -.6159493E-02  -.6952364E-02
  -.7366772E-02  -.9388257E-02  -.1482718E-01  -.2208445E-01  -.2744034E-01
  -.2936793E-01  -.2951251E-01  -.2929998E-01  -.2844424E-01  -.2756753E-01
  -.2837100E-01  -.3028953E-01  -.3013679E-01  -.2659951E-01  -.2281463E-01
  -.2235868E-01  -.2462285E-01  -.2613959E-01  -.2473391E-01  -.2082174E-01
  -.1581354E-01  -.1124328E-01  -.9075356E-02  -.1078182E-01  -.1552101E-01
  -.2060866E-01  -.2406900E-01  -.2611967E-01  -.2820244E-01  -.3054772E-01
  -.3142561E-01  -.2887702E-01  -.2265409E-01  -.1410919E-01  -.5612598E-02
  -.4766844E-03  -.1347157E-02  -.6861089E-02  -.1152762E-01  -.1115352E-01
  -.6486816E-02  -.4473121E-03   .6231785E-02   .1468105E-01   .2453781E-01
   .3377068E-01   .4117437E-01   .4770025E-01   .5506860E-01   .6302672E-01
   .6914336E-01   .7169015E-01   .7115718E-01   .6841049E-01   .6386508E-01
   .6034764E-01   .6367150E-01   .7707846E-01   .9626334E-01   .1121102E+00
   .1177221E+00   .1121815E+00   .1001790E+00   .8940222E-01   .8549131E-01
   .8774802E-01   .9087064E-01   .9102977E-01   .8852263E-01   .8481986E-01
   .8012850E-01   .7437845E-01   .6806185E-01   .6180844E-01   .5564793E-01
   .4898722E-01   .4160789E-01   .3443860E-01   .2950011E-01   .2858983E-01
   .3084958E-01   .3258040E-01   .3031165E-01   .2389044E-01   .1548972E-01
   .6208454E-02  -.4063453E-02  -.1477912E-01  -.2475925E-01  -.3360561E-01
  -.4120813E-01  -.4636838E-01  -.4790229E-01  -.4652083E-01  -.4417688E-01
  -.4221650E-01  -.4127265E-01  -.4223500E-01  -.4573771E-01  -.5050851E-01
  -.5393650E-01  -.5491449E-01  -.5500514E-01  -.5636027E-01  -.5903274E-01
  -.6108701E-01  -.6130856E-01  -.6044274E-01  -.5972691E-01  -.5967524E-01
  -.6067860E-01  -.6334968E-01  -.6720816E-01  -.7042624E-01  -.7160057E-01
  -.7079062E-01  -.6863584E-01  -.6537930E-01  -.6193758E-01  -.6035881E-01
  -.6211815E-01  -.6704511E-01  -.7442880E-01  -.8369015E-01  -.9329304E-01
  -.1014390E+00  -.1085534E+00  -.1164134E+00  -.1244653E+00  -.1298186E+00
  -.1310776E+00  -.1295182E+00  -.1271728E+00  -.1256093E+00  -.1259514E+00
  -.1278161E+00  -.1284490E+00  -.1242336E+00  -.1140874E+00  -.1001706E+00
  -.8611444E-01  -.7412087E-01  -.6370725E-01  -.5216109E-01  -.3798516E-01
  -.2203360E-01  -.9948326E-02  -.4954787E-02   .4400617E-02   .1599575E-01
   .2071134E-01   .2098457E-01   .2307171E-01   .2729819E-01   .3039625E-01
   .3068641E-01   .2841568E-01   .2436213E-01   .1957167E-01   .1539701E-01
   .1299206E-01   .1248178E-01   .1205272E-01   .8571057E-02   .6177247E-03
  -.9115457E-02  -.1643218E-01  -.1980499E-01  -.2073890E-01  -.2090062E-01
  -.2047675E-01  -.1915092E-01  -.1715688E-01  -.1523741E-01  -.1418841E-01
  -.1443828E-01  -.1609063E-01  -.1904129E-01  -.2258335E-01  -.2481658E-01
  -.2389489E-01  -.2074950E-01  -.1896363E-01  -.2124036E-01  -.2673601E-01
  -.3257496E-01  -.3670567E-01  -.3831610E-01  -.3771193E-01  -.3663770E-01
  -.3684510E-01  -.3810599E-01  -.3860525E-01  -.3709336E-01  -.3308647E-01
  -.2567475E-01  -.1422019E-01  -.6095335E-04   .1419707E-01   .2641017E-01
   .3510895E-01   .3935065E-01   .3944201E-01   .3680799E-01   .3274565E-01
   .2800785E-01   .2266263E-01   .1558020E-01   .5648749E-02  -.5644122E-02
  -.1308677E-01  -.1091509E-01   .1970718E-02   .2063655E-01   .3670274E-01
   .4178884E-01   .3197496E-01   .1149883E-01  -.9623300E-02  -.2306345E-01
  -.2731002E-01  -.2565652E-01  -.2056904E-01  -.1144890E-01   .1976693E-02
   .1610794E-01   .2550634E-01   .2771207E-01   .2504218E-01   .2181520E-01
   .2105442E-01   .2373092E-01   .2840425E-01   .3201295E-01   .3281541E-01
   .3142622E-01   .2821444E-01   .2243972E-01   .1537510E-01   .1075905E-01
   .1040474E-01   .1204271E-01   .1306810E-01   .1281002E-01   .1060320E-01
   .5434082E-02  -.2309340E-02  -.1113030E-01  -.2015424E-01  -.2827853E-01
  -.3400110E-01  -.3720422E-01  -.3893545E-01  -.3967661E-01  -.3908806E-01
  -.3651059E-01  -.3144364E-01  -.2485925E-01  -.1908787E-01  -.1416373E-01
  -.7125620E-02   .2725762E-02   .1142313E-01   .1559926E-01   .1622195E-01
   .1516052E-01   .1357073E-01   .1445401E-01   .2067681E-01   .2953866E-01
   .3405050E-01   .3120060E-01   .2466500E-01   .1951396E-01   .1819243E-01
   .2089575E-01   .2631941E-01   .3193881E-01   .3628706E-01   .4015307E-01
   .4420973E-01   .4763032E-01   .4961901E-01   .5016029E-01   .4966162E-01
   .4879483E-01   .4817113E-01   .4716310E-01   .4440460E-01   .3999794E-01
   .3595372E-01   .3398492E-01   .3330231E-01   .3102484E-01   .2585866E-01
   .2085338E-01   .2066961E-01   .2641396E-01   .3429661E-01   .3910469E-01
   .3832651E-01   .3343537E-01   .2781703E-01   .2367460E-01   .2079582E-01
   .1759716E-01   .1286220E-01   .6440933E-02  -.1656207E-02  -.1172610E-01
  -.2385473E-01  -.3757362E-01  -.5178466E-01  -.6432618E-01  -.7261260E-01
  -.7586853E-01  -.7618634E-01  -.7661056E-01  -.7804167E-01  -.7930338E-01
  -.7990091E-01  -.8033915E-01  -.8000176E-01  -.7666868E-01  -.6943008E-01
  -.6082338E-01  -.5458287E-01  -.5178935E-01  -.5009594E-01  -.4684487E-01
  -.4264524E-01  -.4016113E-01  -.3966393E-01  -.3845697E-01  -.3466518E-01
  -.2979654E-01  -.2668147E-01  -.2622985E-01  -.2708691E-01  -.2745337E-01
  -.2623690E-01  -.2275709E-01  -.1596956E-01  -.5159110E-02   .8640946E-02
   .2254094E-01   .3398398E-01   .4273129E-01   .4988510E-01   .5536245E-01
   .5820932E-01   .5905245E-01   .5984194E-01   .6117738E-01   .6116560E-01
   .5810121E-01   .5347405E-01   .5039388E-01   .4991671E-01   .4985214E-01
   .4687220E-01   .3872244E-01   .2489918E-01   .7477212E-02  -.9767449E-02
  -.2380433E-01  -.3339536E-01  -.3899369E-01  -.4246088E-01  -.4617225E-01
  -.5135635E-01  -.5689804E-01  -.6065635E-01  -.6161276E-01  -.6059329E-01
  -.5847461E-01  -.5464063E-01  -.4812296E-01  -.3950389E-01  -.3053604E-01
  -.2180650E-01  -.1260381E-01  -.3287278E-02   .4220651E-02   .9588724E-02
   .1482055E-01   .2088414E-01   .2533391E-01   .2517656E-01   .2126624E-01
   .1761098E-01   .1666209E-01   .1673692E-01   .1491755E-01   .1124324E-01
   .8389861E-02   .8014476E-02   .9500419E-02   .1145364E-01   .1306236E-01
   .1454624E-01   .1710151E-01   .2155154E-01   .2658367E-01   .2940490E-01
   .2833171E-01   .2386552E-01   .1751221E-01   .1104529E-01   .6550349E-02
   .5589443E-02   .7581726E-02   .9714023E-02   .9426036E-02   .6337887E-02
   .2170682E-02  -.8169731E-03  -.1775060E-02  -.1863082E-02  -.2436308E-02
  -.3472793E-02  -.4343308E-02  -.4758396E-02  -.4775286E-02  -.4686363E-02
  -.5217847E-02  -.6881762E-02  -.9015827E-02  -.1092310E-01  -.1297410E-01
  -.1574977E-01  -.1886718E-01  -.2168922E-01  -.2416867E-01  -.2635482E-01
  -.2817485E-01  -.2978418E-01  -.3155525E-01  -.3397224E-01  -.3755229E-01
  -.4216377E-01  -.4650673E-01  -.4914924E-01  -.5057412E-01  -.5262490E-01
  -.5587564E-01  -.5915207E-01  -.6155398E-01  -.6336389E-01  -.6511491E-01
  -.6631932E-01  -.6625714E-01  -.6485408E-01  -.6223475E-01  -.5847097E-01
  -.5365420E-01  -.4825264E-01  -.4322744E-01  -.3955375E-01  -.3742939E-01
  -.3628804E-01  -.3576014E-01  -.3588712E-01  -.3655847E-01  -.3737175E-01
  -.3770337E-01  -.3697460E-01  -.3533651E-01  -.3359912E-01  -.3244289E-01
  -.3239533E-01  -.3402755E-01  -.3788654E-01  -.4374563E-01  -.5024817E-01
  -.5568244E-01  -.5878929E-01  -.5945072E-01  -.5850195E-01  -.5685269E-01
  -.5478513E-01  -.5241986E-01  -.5010089E-01  -.4824817E-01  -.4678134E-01
  -.4461407E-01  -.4051234E-01  -.3451645E-01  -.2798127E-01  -.2219820E-01
  -.1755346E-01  -.1377719E-01  -.1067436E-01  -.8068980E-02  -.5769763E-02
  -.3865268E-02  -.2325659E-02  -.8929507E-03   .7744447E-03   .2986093E-02
   .5647912E-02   .7921211E-02   .9122324E-02   .9958988E-02   .1155455E-01
   .1406245E-01   .1679860E-01   .1964420E-01   .2309421E-01   .2718864E-01
   .3155350E-01   .3618928E-01   .4096400E-01   .4513041E-01   .4805655E-01
   .4961416E-01   .4988932E-01   .4898713E-01   .4754557E-01   .4678536E-01
   .4738075E-01   .4876013E-01   .5002950E-01   .5088380E-01   .5139639E-01
   .5200393E-01   .5354923E-01   .5603210E-01   .5807187E-01   .5851857E-01
   .5742108E-01   .5544884E-01   .5337932E-01   .5194692E-01   .5153135E-01
   .5167001E-01   .5140393E-01   .4983628E-01   .4663791E-01   .4254159E-01
   .3943503E-01   .3892025E-01   .4077147E-01   .4339088E-01   .4490481E-01
   .4400502E-01   .4068608E-01   .3651688E-01   .3389159E-01   .3453146E-01
   .3835486E-01   .4341726E-01   .4707800E-01   .4782096E-01   .4585530E-01
   .4228278E-01   .3840765E-01   .3527423E-01   .3328813E-01   .3167205E-01
   .2893055E-01   .2392613E-01   .1654326E-01   .7249003E-02  -.3711997E-02
  -.1648069E-01  -.3072778E-01  -.4458111E-01  -.5564183E-01  -.6302133E-01
  -.6810517E-01  -.7291356E-01  -.7809097E-01  -.8266076E-01  -.8526035E-01
  -.8565736E-01  -.8482909E-01  -.8360271E-01  -.8190430E-01  -.7941390E-01
  -.7651637E-01  -.7385951E-01  -.7181596E-01  -.7094073E-01  -.7221466E-01
  -.7592135E-01  -.8093238E-01  -.8484017E-01  -.8510748E-01  -.8184494E-01
  -.7877624E-01  -.7908324E-01  -.8061612E-01  -.7811931E-01  -.7065621E-01
  -.6406005E-01  -.6433572E-01  -.7081161E-01  -.7766291E-01  -.8060071E-01
  -.7979091E-01  -.7586561E-01  -.6729952E-01  -.5455503E-01  -.4281338E-01
  -.3655784E-01  -.3405154E-01  -.3027308E-01  -.2338234E-01  -.1540578E-01
  -.7682363E-02   .5248510E-03   .8864141E-02   .1464715E-01   .1647167E-01
   .1662916E-01   .1785105E-01   .1979938E-01   .2048257E-01   .1926782E-01
   .1662307E-01   .1251778E-01   .6865985E-02   .1380357E-03  -.7315367E-02
  -.1492395E-01  -.2078064E-01  -.2244495E-01  -.1939993E-01  -.1382279E-01
  -.8473488E-02  -.4449841E-02  -.1455334E-02   .1167845E-02   .4428209E-02
   .9641091E-02   .1689809E-01   .2455214E-01   .3121069E-01   .3756519E-01
   .4528111E-01   .5404536E-01   .6041526E-01   .6108178E-01   .5668924E-01
   .5122407E-01   .4825110E-01   .4774126E-01   .4617322E-01   .3981774E-01
   .2831360E-01   .1509461E-01   .3890471E-02  -.4440164E-02  -.1144961E-01
  -.1849030E-01  -.2555136E-01  -.3122846E-01  -.3351336E-01  -.3185541E-01
  -.2845033E-01  -.2768199E-01  -.3349019E-01  -.4603878E-01  -.6063277E-01
  -.7072097E-01  -.7349827E-01  -.7200541E-01  -.7026547E-01  -.6938605E-01
  -.6882804E-01  -.6800346E-01  -.6587449E-01  -.6147342E-01  -.5569804E-01
  -.5079201E-01  -.4812521E-01  -.4810168E-01  -.5072325E-01  -.5401264E-01
  -.5357812E-01  -.4675458E-01  -.3627601E-01  -.2698648E-01  -.2065442E-01
  -.1674443E-01  -.1591479E-01  -.1829314E-01  -.2010834E-01  -.1712699E-01
  -.1012002E-01  -.2863957E-02   .3866336E-02   .1233904E-01   .2280340E-01
   .3235611E-01   .3936594E-01   .4589852E-01   .5419424E-01   .6323889E-01
   .7047587E-01   .7517781E-01   .7809478E-01   .7889570E-01   .7740107E-01
   .7560667E-01   .7566615E-01   .7663767E-01   .7527407E-01   .6965676E-01
   .6115012E-01   .5322258E-01   .4924007E-01   .5004936E-01   .5310091E-01
   .5494024E-01   .5431520E-01   .5226137E-01   .4964503E-01   .4695952E-01
   .4535856E-01   .4581907E-01   .4720085E-01   .4641197E-01   .4141755E-01
   .3322777E-01   .2524160E-01   .2023682E-01   .1809721E-01   .1691356E-01
   .1553888E-01   .1411626E-01   .1232852E-01   .9569797E-02   .7124006E-02
   .7080798E-02   .9110560E-02   .9632439E-02   .5284101E-02  -.2498908E-02
  -.8406624E-02  -.9120268E-02  -.6654430E-02  -.5448856E-02  -.7381911E-02
  -.1136861E-01  -.1624920E-01  -.2120607E-01  -.2445812E-01  -.2400296E-01
  -.2024226E-01  -.1626962E-01  -.1457353E-01  -.1474834E-01  -.1471325E-01
  -.1350079E-01  -.1190622E-01  -.1019161E-01  -.6490244E-02   .9356367E-03
   .9752848E-02   .1422701E-01   .1175552E-01   .6192158E-02   .3109571E-02
   .4343084E-02   .9156084E-02   .1770342E-01   .2933451E-01   .3803864E-01
   .3429473E-01   .1459715E-01  -.1086258E-01  -.2364655E-01  -.1365649E-01
   .1108049E-01   .3263636E-01   .3991084E-01   .3515457E-01   .2664057E-01
   .1911838E-01   .1263261E-01   .6656333E-02   .1863312E-02  -.1458793E-02
  -.4602010E-02  -.8916355E-02  -.1428276E-01  -.2026695E-01  -.2768544E-01
  -.3682069E-01  -.4499714E-01  -.4833711E-01  -.4597424E-01  -.4068177E-01
  -.3576147E-01  -.3303652E-01  -.3325249E-01  -.3611710E-01  -.3974319E-01
  -.4196833E-01  -.4160281E-01  -.3781149E-01  -.3011332E-01  -.2012258E-01
  -.1135814E-01  -.6762901E-02  -.6914466E-02  -.9784502E-02  -.1175098E-01
  -.9056129E-02  -.2726165E-03   .1248535E-01   .2535092E-01   .3513565E-01
   .4064511E-01   .4326971E-01   .4615602E-01   .5164807E-01   .5955676E-01
   .6752422E-01   .7260524E-01   .7314745E-01   .6989047E-01   .6515657E-01
   .6131641E-01   .5992978E-01   .6107106E-01   .6309644E-01   .6391051E-01
   .6310046E-01   .6097401E-01   .5679501E-01   .5003579E-01   .4213727E-01
   .3560392E-01   .3245760E-01   .3366497E-01   .3815983E-01   .4242923E-01
   .4305669E-01   .3929660E-01   .3255845E-01   .2552641E-01   .2182235E-01
   .2287450E-01   .2486021E-01   .2267445E-01   .1673869E-01   .1147521E-01
   .8288575E-02   .5549432E-02   .3695728E-02   .4669948E-02   .7600903E-02
   .9817350E-02   .1088748E-01   .1211141E-01   .1340322E-01   .1398614E-01
   .1505640E-01   .1863215E-01   .2424734E-01   .2972807E-01   .3402603E-01
   .3732139E-01   .3964461E-01   .4075149E-01   .4105747E-01   .4181794E-01
   .4389285E-01   .4700042E-01   .5033692E-01   .5325389E-01   .5499284E-01
   .5474812E-01   .5291304E-01   .5122529E-01   .5125933E-01   .5305461E-01
   .5534341E-01   .5669687E-01   .5604335E-01   .5318700E-01   .4925865E-01
   .4584343E-01   .4372800E-01   .4282559E-01   .4281595E-01   .4348649E-01
   .4388529E-01   .4225869E-01   .3781472E-01   .3222693E-01   .2829456E-01
   .2708389E-01   .2773276E-01   .2931753E-01   .3119548E-01   .3251222E-01
   .3270711E-01   .3244091E-01   .3309997E-01   .3494608E-01   .3669195E-01
   .3684871E-01   .3490487E-01   .3060912E-01   .2353216E-01   .1391010E-01
   .3456243E-02  -.5067360E-02  -.1003766E-01  -.1267565E-01  -.1563442E-01
  -.2006374E-01  -.2518900E-01  -.2999225E-01  -.3424872E-01  -.3787335E-01
  -.4036144E-01  -.4204263E-01  -.4459487E-01  -.4876717E-01  -.5304877E-01
  -.5609130E-01  -.5858912E-01  -.6210140E-01  -.6718313E-01  -.7293588E-01
  -.7750181E-01  -.7917388E-01  -.7844852E-01  -.7747777E-01  -.7746318E-01
  -.7823124E-01  -.7977213E-01  -.8222253E-01  -.8432591E-01  -.8407178E-01
  -.8114394E-01  -.7701041E-01  -.7266786E-01  -.6777099E-01  -.6170027E-01
  -.5443589E-01  -.4666442E-01  -.3947568E-01  -.3369582E-01  -.2912515E-01
  -.2471140E-01  -.1976319E-01  -.1503854E-01  -.1183836E-01  -.1044417E-01
  -.9920472E-02  -.8859200E-02  -.6173686E-02  -.1598014E-02   .4474002E-02
   .1104869E-01   .1693710E-01   .2168309E-01   .2607145E-01   .3110613E-01
   .3679133E-01   .4203447E-01   .4567905E-01   .4717065E-01   .4634588E-01
   .4325925E-01   .3874371E-01   .3493663E-01   .3408961E-01   .3649438E-01
   .4037060E-01   .4337511E-01   .4437915E-01   .4341756E-01   .4085351E-01
   .3713088E-01   .3304854E-01   .2954579E-01   .2724510E-01   .2610479E-01
   .2539221E-01   .2405938E-01   .2122574E-01   .1728154E-01   .1427826E-01
   .1473693E-01   .1963577E-01   .2709323E-01   .3302077E-01   .3440318E-01
   .3184534E-01   .2846891E-01   .2713833E-01   .2915207E-01   .3439965E-01
   .4094258E-01   .4517966E-01   .4491961E-01   .4194765E-01   .3981115E-01
   .3974657E-01   .4028437E-01   .3961736E-01   .3740870E-01   .3441232E-01
   .3176675E-01   .3018138E-01   .2915880E-01   .2779435E-01   .2596737E-01
   .2379682E-01   .2087498E-01   .1687208E-01   .1248082E-01   .8871791E-02
   .6867964E-02   .7206276E-02   .9882829E-02   .1324263E-01   .1484558E-01
   .1353238E-01   .9859922E-02   .5275829E-02   .1960528E-02   .1658225E-02
   .3913104E-02   .6480774E-02   .7579658E-02   .7058354E-02   .5840235E-02
   .4923588E-02   .4290230E-02   .2494157E-02  -.1850612E-02  -.8183511E-02
  -.1421173E-01  -.1780479E-01  -.1815178E-01  -.1594205E-01  -.1246664E-01
  -.8469363E-02  -.3888475E-02   .6948354E-03   .3524830E-02   .3936765E-02
   .4155342E-02   .7040840E-02   .1325704E-01   .2121927E-01   .2847866E-01
   .3310578E-01   .3456576E-01   .3442106E-01   .3519143E-01   .3836245E-01
   .4373469E-01   .4966440E-01   .5402876E-01   .5558383E-01   .5459286E-01
   .5207496E-01   .4879248E-01   .4541063E-01   .4252908E-01   .4017279E-01
   .3822592E-01   .3689466E-01   .3628087E-01   .3618547E-01   .3671103E-01
   .3834568E-01   .4119631E-01   .4441606E-01   .4706985E-01   .4901212E-01
   .5078361E-01   .5284918E-01   .5493936E-01   .5624111E-01   .5627486E-01
   .5540372E-01   .5405028E-01   .5185227E-01   .4854143E-01   .4484349E-01
   .4158839E-01   .3887741E-01   .3655484E-01   .3457394E-01   .3284707E-01
   .3043363E-01   .2593638E-01   .1892731E-01   .1047340E-01   .2262357E-02
  -.4575693E-02  -.9453832E-02  -.1207142E-01  -.1282877E-01  -.1268659E-01
  -.1242806E-01  -.1293156E-01  -.1531200E-01  -.1979462E-01  -.2514410E-01
  -.2992689E-01  -.3415197E-01  -.3862531E-01  -.4310650E-01  -.4643965E-01
  -.4828394E-01  -.4919908E-01  -.4912955E-01  -.4700222E-01  -.4259772E-01
  -.3743805E-01  -.3314805E-01  -.2990382E-01  -.2683018E-01  -.2304121E-01
  -.1822767E-01  -.1300228E-01  -.8557710E-02  -.5666812E-02  -.4119464E-02
  -.2923055E-02  -.1206003E-02   .1042382E-02   .2913234E-02   .3513208E-02
   .3169872E-02   .3082702E-02   .3717605E-02   .4093414E-02   .2924725E-02
   .1135754E-03  -.3284825E-02  -.6566343E-02  -.9882744E-02  -.1362786E-01
  -.1777235E-01  -.2195263E-01  -.2570228E-01  -.2820541E-01  -.2821088E-01
  -.2545153E-01  -.2163594E-01  -.1921209E-01  -.1917809E-01  -.2032828E-01
  -.2082209E-01  -.1991231E-01  -.1768715E-01  -.1440436E-01  -.1097010E-01
  -.9283266E-02  -.1066773E-01  -.1451920E-01  -.1841990E-01  -.1974161E-01
  -.1785961E-01  -.1467667E-01  -.1278006E-01  -.1315440E-01  -.1490886E-01
  -.1652568E-01  -.1710521E-01  -.1618040E-01  -.1335687E-01  -.8979827E-02
  -.4282226E-02  -.5628162E-04   .3868595E-02   .7007375E-02   .7718019E-02
   .5233423E-02   .7724818E-03  -.3874386E-02  -.7606090E-02  -.9820867E-02
  -.1035618E-01  -.9518183E-02  -.7977521E-02  -.6808165E-02  -.6725877E-02
  -.6750337E-02  -.4774966E-02  -.5250105E-03   .3421818E-02   .4635209E-02
   .3573039E-02   .2410016E-02   .2069975E-02   .1925938E-02   .1096234E-02
  -.1373864E-02  -.6464861E-02  -.1401265E-01  -.2203457E-01  -.2822422E-01
  -.3177876E-01  -.3338623E-01  -.3353238E-01  -.3197572E-01  -.2926590E-01
  -.2702576E-01  -.2626716E-01  -.2677809E-01  -.2796015E-01  -.2921011E-01
  -.2925133E-01  -.2688413E-01  -.2297720E-01  -.2013599E-01  -.2001917E-01
  -.2167729E-01  -.2282502E-01  -.2175496E-01  -.1841026E-01  -.1463481E-01
  -.1262221E-01  -.1288670E-01  -.1432668E-01  -.1581898E-01  -.1718289E-01
  -.1850144E-01  -.1943324E-01  -.1996152E-01  -.2059528E-01  -.2168878E-01
  -.2306372E-01  -.2460131E-01  -.2590812E-01  -.2592373E-01  -.2365998E-01
  -.1927038E-01  -.1401318E-01  -.9516336E-02  -.6756435E-02  -.5404166E-02
  -.4419181E-02  -.2886837E-02  -.2664813E-03   .3378730E-02   .7154240E-02
   .1012897E-01   .1194740E-01   .1240015E-01   .1105660E-01   .7783231E-02
   .3225813E-02  -.1807193E-02  -.6780275E-02  -.1087101E-01  -.1318470E-01
  -.1376120E-01  -.1347573E-01  -.1264478E-01  -.1077372E-01  -.7600906E-02
  -.3812436E-02  -.8990174E-03  -.3218207E-03  -.2666097E-02  -.7134186E-02
  -.1191246E-01  -.1507837E-01  -.1562967E-01  -.1374991E-01  -.1047703E-01
  -.7343852E-02  -.5407817E-02  -.4475571E-02  -.3801025E-02  -.3158366E-02
  -.3019399E-02  -.4026674E-02  -.6499560E-02  -.9728634E-02  -.1202886E-01
  -.1180191E-01  -.8679200E-02  -.3924786E-02   .8017484E-03   .4591709E-02
   .7656347E-02   .1056055E-01   .1316126E-01   .1461554E-01   .1454943E-01
   .1373838E-01   .1322114E-01   .1340231E-01   .1436317E-01   .1620652E-01
   .1891937E-01   .2202513E-01   .2455674E-01   .2570490E-01   .2522712E-01
   .2366104E-01   .2207509E-01   .2124403E-01   .2090634E-01   .1997250E-01
   .1806251E-01   .1608010E-01   .1522390E-01   .1590043E-01   .1800180E-01
   .2078755E-01   .2318221E-01   .2455684E-01   .2519702E-01   .2580446E-01
   .2668159E-01   .2784990E-01   .2941543E-01   .3147341E-01   .3419369E-01
   .3770319E-01   .4138092E-01   .4392103E-01   .4472101E-01   .4490992E-01
   .4586040E-01   .4727244E-01   .4827413E-01   .4891682E-01   .4895456E-01
   .4705923E-01   .4296373E-01   .3876032E-01   .3603569E-01   .3367311E-01
   .2992376E-01   .2457182E-01   .1864694E-01   .1342341E-01   .9847487E-02
   .8320181E-02   .8194416E-02   .8308253E-02   .7740832E-02   .5812586E-02
   .2273316E-02  -.2098251E-02  -.5244062E-02  -.5143811E-02  -.2010447E-02
   .1370608E-02   .2974680E-02   .3944694E-02   .6540460E-02   .1072360E-01
   .1426804E-01   .1580573E-01   .1614270E-01   .1629125E-01   .1601660E-01
   .1476678E-01   .1296170E-01   .1135431E-01   .9723603E-02   .7172071E-02
   .3450693E-02  -.5080282E-03  -.3608522E-02  -.5720372E-02  -.7642316E-02
  -.9905087E-02  -.1239100E-01  -.1480051E-01  -.1691248E-01  -.1885414E-01
  -.2083371E-01  -.2278297E-01  -.2463492E-01  -.2654373E-01  -.2841460E-01
  -.2955463E-01  -.2927200E-01  -.2774071E-01  -.2601034E-01  -.2493974E-01
  -.2430640E-01  -.2345472E-01  -.2211270E-01  -.2044239E-01  -.1876284E-01
  -.1735250E-01  -.1618504E-01  -.1484364E-01  -.1333808E-01  -.1236649E-01
  -.1235597E-01  -.1288373E-01  -.1301926E-01  -.1182934E-01  -.8969146E-02
  -.5169874E-02  -.1750500E-02   .5783103E-03   .2049449E-02   .2741074E-02
   .2369127E-02   .1133578E-02  -.4854207E-03  -.2232936E-02  -.4094745E-02
  -.6029698E-02  -.8174152E-02  -.1069776E-01  -.1334759E-01  -.1562624E-01
  -.1711750E-01  -.1794026E-01  -.1869298E-01  -.2023326E-01  -.2273770E-01
  -.2554380E-01  -.2788009E-01  -.2964477E-01  -.3137536E-01  -.3347430E-01
  -.3582469E-01  -.3801605E-01  -.3965123E-01  -.4045732E-01  -.4037602E-01
  -.3955327E-01  -.3794873E-01  -.3553952E-01  -.3286585E-01  -.3083912E-01
  -.3002900E-01  -.3015567E-01  -.3063387E-01  -.3083111E-01  -.3026112E-01
  -.2883731E-01  -.2681577E-01  -.2442957E-01  -.2167640E-01  -.1863546E-01
  -.1540645E-01  -.1205849E-01  -.8899838E-02  -.6424459E-02  -.4841888E-02
  -.3966225E-02  -.3417633E-02  -.3012138E-02  -.2911379E-02  -.3095658E-02
  -.3049043E-02  -.2683195E-02  -.2609673E-02  -.3427506E-02  -.5175658E-02
  -.7319360E-02  -.9125308E-02  -.1024259E-01  -.1067234E-01  -.1055752E-01
  -.1010618E-01  -.9393320E-02  -.8363535E-02  -.7212058E-02  -.6488813E-02
  -.6577200E-02  -.7389416E-02  -.8699762E-02  -.1030306E-01  -.1202841E-01
  -.1370824E-01  -.1515004E-01  -.1636496E-01  -.1757441E-01  -.1884224E-01
  -.1960390E-01  -.1887582E-01  -.1648458E-01  -.1346041E-01  -.1099178E-01
  -.9422085E-02  -.8431051E-02  -.7591395E-02  -.6053919E-02  -.2801437E-02
   .1920822E-02   .6631446E-02   .1043885E-01   .1331180E-01   .1509087E-01
   .1546377E-01   .1452195E-01   .1265422E-01   .9894479E-02   .5919124E-02
   .6882202E-03  -.5236624E-02  -.1101793E-01  -.1612983E-01  -.2017406E-01
  -.2276705E-01  -.2403880E-01  -.2500229E-01  -.2675592E-01  -.2934890E-01
  -.3211930E-01  -.3487501E-01  -.3775251E-01  -.4028940E-01  -.4189181E-01
  -.4269888E-01  -.4307973E-01  -.4313254E-01  -.4292316E-01  -.4259442E-01
  -.4223896E-01  -.4187317E-01  -.4130481E-01  -.4030512E-01  -.3884929E-01
  -.3714562E-01  -.3537023E-01  -.3305743E-01  -.2926425E-01  -.2346914E-01
  -.1606974E-01  -.8347987E-02  -.1903446E-02   .2348552E-02   .4721241E-02
   .6356304E-02   .8269620E-02   .1065399E-01   .1279557E-01   .1365494E-01
   .1250005E-01   .9463007E-02   .5451758E-02   .1480674E-02  -.2108024E-02
  -.5411273E-02  -.8031389E-02  -.9532229E-02  -.1011942E-01  -.1034189E-01
  -.1040766E-01  -.1021448E-01  -.9760885E-02  -.8995740E-02  -.7385831E-02
  -.4764340E-02  -.1688721E-02   .8187773E-03   .1687615E-02   .8126070E-03
  -.8774360E-03  -.2363516E-02  -.3454468E-02  -.4619108E-02  -.6078575E-02
  -.7451663E-02  -.8310536E-02  -.8327096E-02  -.6796786E-02  -.3013668E-02
   .2800463E-02   .9636598E-02   .1684559E-01   .2395088E-01   .3015273E-01
   .3476969E-01   .3759867E-01   .3879598E-01   .3873247E-01   .3834210E-01
   .3865329E-01   .3972371E-01   .4091065E-01   .4167881E-01   .4176448E-01
   .4131235E-01   .4095297E-01   .4125951E-01   .4226202E-01   .4333915E-01
   .4370987E-01   .4298657E-01   .4117276E-01   .3855120E-01   .3540000E-01
   .3171169E-01   .2777216E-01   .2434297E-01   .2197592E-01   .2063861E-01
   .1979587E-01   .1891075E-01   .1740935E-01   .1492068E-01   .1135933E-01
   .7271227E-02   .3715488E-02   .1255414E-02  -.3170824E-03  -.1263216E-02
  -.1620045E-02  -.1523813E-02  -.1394642E-02  -.1762415E-02  -.3025008E-02
  -.5314622E-02  -.8185014E-02  -.1092126E-01  -.1304419E-01  -.1460788E-01
  -.1601093E-01  -.1757612E-01  -.1895827E-01  -.1925445E-01  -.1794358E-01
  -.1533411E-01  -.1221869E-01  -.9513449E-02  -.8110983E-02  -.8382788E-02
  -.9607018E-02  -.1030213E-01  -.9319415E-02  -.6698525E-02  -.3229128E-02
   .4690085E-03   .3951742E-02   .6517422E-02   .7524589E-02   .6758267E-02
   .4717206E-02   .2667408E-02   .1869840E-02   .2933318E-02   .5643305E-02
   .9176060E-02   .1253896E-01   .1479657E-01   .1550348E-01   .1505710E-01
   .1433202E-01   .1414570E-01   .1490409E-01   .1642382E-01   .1819489E-01
   .1977316E-01   .2066068E-01   .2062406E-01   .2024697E-01   .2020351E-01
   .2033159E-01   .2003505E-01   .1921189E-01   .1861620E-01   .1904565E-01
   .2071607E-01   .2282608E-01   .2372612E-01   .2219196E-01   .1849906E-01
   .1409327E-01   .1016922E-01   .7322553E-02   .6024806E-02   .6705805E-02
   .9084024E-02   .1186726E-01   .1346837E-01   .1327757E-01   .1236652E-01
   .1196324E-01   .1182038E-01   .1065377E-01   .7679917E-02   .3346401E-02
  -.9777862E-03  -.3699333E-02  -.4223068E-02  -.3205050E-02  -.2023808E-02
  -.1753318E-02  -.2055429E-02  -.1926328E-02  -.1001172E-02   .1270299E-03
   .8264214E-03   .1134739E-02   .1267924E-02   .1263006E-02   .1334384E-02
   .1981446E-02   .3668688E-02   .6484377E-02   .1022684E-01   .1449482E-01
   .1877167E-01   .2249903E-01   .2532500E-01   .2722757E-01   .2830840E-01
   .2862684E-01   .2837259E-01   .2776759E-01   .2649512E-01   .2375620E-01
   .1921978E-01   .1369564E-01   .8447270E-02   .4155149E-02   .8981257E-03
  -.1481341E-02  -.3457093E-02  -.5730644E-02  -.8476667E-02  -.1124218E-01
  -.1334678E-01  -.1435248E-01  -.1450345E-01  -.1456812E-01  -.1492547E-01
  -.1545079E-01  -.1579312E-01  -.1612141E-01  -.1701173E-01  -.1865187E-01
  -.2055544E-01  -.2245606E-01  -.2442798E-01  -.2569189E-01  -.2490990E-01
  -.2193167E-01  -.1844343E-01  -.1655625E-01  -.1670496E-01  -.1744870E-01
  -.1749092E-01  -.1720219E-01  -.1792253E-01  -.2005105E-01  -.2247803E-01
  -.2404660E-01  -.2449343E-01  -.2414036E-01  -.2355875E-01  -.2299464E-01
  -.2233426E-01  -.2138368E-01  -.2029547E-01  -.1959879E-01  -.1993011E-01
  -.2114569E-01  -.2228642E-01  -.2251416E-01  -.2180969E-01  -.2048019E-01
  -.1845026E-01  -.1609867E-01  -.1438149E-01  -.1362705E-01  -.1294025E-01
  -.1130039E-01  -.8870648E-02  -.6603950E-02  -.5103702E-02  -.4285128E-02
  -.3712692E-02  -.2741736E-02  -.1046415E-02   .8781991E-03   .2005812E-02
   .1426599E-02  -.1300091E-02  -.5450326E-02  -.9232342E-02  -.1093068E-01
  -.1013357E-01  -.7826526E-02  -.5601813E-02  -.4427881E-02  -.4359735E-02
  -.5227189E-02  -.6809323E-02  -.8165282E-02  -.8068106E-02  -.6686314E-02
  -.5506345E-02  -.5122619E-02  -.5263291E-02  -.6452279E-02  -.9054134E-02
  -.1119733E-01  -.1087845E-01  -.9162883E-02  -.8325104E-02  -.8708697E-02
  -.9528761E-02  -.1054780E-01  -.1147830E-01  -.1093094E-01  -.7726939E-02
  -.3052673E-02   .6578480E-03   .2605106E-02   .3817731E-02   .5170768E-02
   .6482527E-02   .7090341E-02   .6617628E-02   .4869376E-02   .1381070E-02
  -.4011371E-02  -.1050901E-01  -.1635532E-01  -.1984271E-01  -.2070434E-01
  -.2014495E-01  -.1982733E-01  -.2050243E-01  -.2154140E-01  -.2227286E-01
  -.2302226E-01  -.2417469E-01  -.2535974E-01  -.2643605E-01  -.2790299E-01
  -.2965132E-01  -.3113261E-01  -.3282822E-01  -.3543530E-01  -.3790614E-01
  -.3841938E-01  -.3671385E-01  -.3405012E-01  -.3142080E-01  -.2899135E-01
  -.2660008E-01  -.2406990E-01  -.2148601E-01  -.1914040E-01  -.1734501E-01
  -.1612994E-01  -.1501703E-01  -.1381427E-01  -.1303096E-01  -.1316602E-01
  -.1362925E-01  -.1305916E-01  -.1063386E-01  -.6875035E-02  -.3344029E-02
  -.1293640E-02  -.5715544E-03  -.1435622E-03   .1348542E-03  -.6714975E-03
  -.2632602E-02  -.4195361E-02  -.4077673E-02  -.2527751E-02  -.5983944E-03
   .9775663E-03   .2044989E-02   .2726657E-02   .3302487E-02   .4261241E-02
   .5814877E-02   .7697027E-02   .9692740E-02   .1206779E-01   .1529957E-01
   .1970122E-01   .2539701E-01   .3209584E-01   .3895468E-01   .4501793E-01
   .4982416E-01   .5363109E-01   .5706469E-01   .6061093E-01   .6446470E-01
   .6835470E-01   .7159225E-01   .7353710E-01   .7384373E-01   .7293700E-01
   .7213599E-01   .7227739E-01   .7270581E-01   .7255355E-01   .7245847E-01
   .7388464E-01   .7658049E-01   .7888871E-01   .8031263E-01   .8147649E-01
   .8196930E-01   .8058710E-01   .7743119E-01   .7401908E-01   .7137645E-01
   .6950535E-01   .6839991E-01   .6770000E-01   .6586926E-01   .6167998E-01
   .5659662E-01   .5325986E-01   .5163581E-01   .4925417E-01   .4483656E-01
   .3999123E-01   .3652912E-01   .3407780E-01   .3143151E-01   .2825887E-01
   .2497704E-01   .2169253E-01   .1843382E-01   .1568221E-01   .1382789E-01
   .1259379E-01   .1143191E-01   .1020103E-01   .9140593E-02   .8533123E-02
   .8486078E-02   .8853051E-02   .8965216E-02   .8455582E-02   .7892682E-02
   .7625450E-02   .6986199E-02   .5096607E-02   .1964087E-02  -.1661072E-02
  -.4930958E-02  -.7195950E-02  -.8385240E-02  -.9060041E-02  -.9665053E-02
  -.1023672E-01  -.1042129E-01  -.9634747E-02  -.7785006E-02  -.5650377E-02
  -.4333653E-02  -.4154181E-02  -.4456250E-02  -.4331461E-02  -.3725496E-02
  -.3397121E-02  -.3727831E-02  -.4432930E-02  -.5162063E-02  -.5651295E-02
  -.5538567E-02  -.4765688E-02  -.3593575E-02  -.1814016E-02   .1045593E-02
   .4569098E-02   .7491073E-02   .8944306E-02   .8994313E-02   .8134351E-02
   .6987984E-02   .6055316E-02   .5150783E-02   .3790476E-02   .1736133E-02
  -.9795221E-03  -.4017131E-02  -.6778694E-02  -.8536588E-02  -.9139715E-02
  -.8863781E-02  -.7719030E-02  -.6107413E-02  -.4715076E-02  -.3628831E-02
  -.2494619E-02  -.1091273E-02   .3930899E-03   .1348804E-02   .1247626E-02
   .1620970E-03  -.1382018E-02  -.2920402E-02  -.4345274E-02  -.5759169E-02
  -.7177003E-02  -.8394962E-02  -.8990919E-02  -.8927224E-02  -.9022070E-02
  -.1000496E-01  -.1143396E-01  -.1250737E-01  -.1315639E-01  -.1339906E-01
  -.1281823E-01  -.1157713E-01  -.1056969E-01  -.9960670E-02  -.8797948E-02
  -.6383875E-02  -.3057325E-02   .4057169E-03   .3155537E-02   .4625248E-02
   .5083226E-02   .5224721E-02   .5411289E-02   .5609900E-02   .5556846E-02
   .4837636E-02   .3297093E-02   .1138225E-02  -.1362773E-02  -.3871156E-02
  -.5599098E-02  -.5880995E-02  -.4854981E-02  -.3281385E-02  -.1863443E-02
  -.1021599E-02  -.1160509E-02  -.2182635E-02  -.3357165E-02  -.4004364E-02
  -.4371027E-02  -.5445075E-02  -.7876656E-02  -.1128848E-01  -.1473835E-01
  -.1769985E-01  -.2068936E-01  -.2478148E-01  -.3029977E-01  -.3593631E-01
  -.3980845E-01  -.4131021E-01  -.4128334E-01  -.4052008E-01  -.3905977E-01
  -.3722250E-01  -.3615008E-01  -.3657927E-01  -.3767038E-01  -.3770981E-01
  -.3583530E-01  -.3259529E-01  -.2861832E-01  -.2409107E-01  -.1919297E-01
  -.1442922E-01  -.1006137E-01  -.5779629E-02  -.1315022E-02   .3403697E-02
   .7883452E-02   .1104135E-01   .1212333E-01   .1106831E-01   .8678123E-02
   .5776437E-02   .2783582E-02  -.7922280E-04  -.2273676E-02  -.3219398E-02
  -.2837323E-02  -.1506236E-02   .2280280E-04   .7421395E-03  -.2097525E-03
  -.2880416E-02  -.6618852E-02  -.1043458E-01  -.1363097E-01  -.1650759E-01
  -.1997047E-01  -.2416083E-01  -.2790542E-01  -.2978995E-01  -.2969741E-01
  -.2890227E-01  -.2864843E-01  -.2927511E-01  -.3031546E-01  -.3101782E-01
  -.3090557E-01  -.3028579E-01  -.3035283E-01  -.3175340E-01  -.3337154E-01
  -.3356721E-01  -.3226634E-01  -.3085979E-01  -.3001198E-01  -.2921256E-01
  -.2785552E-01  -.2583874E-01  -.2353323E-01  -.2211548E-01  -.2322428E-01
  -.2710428E-01  -.3176343E-01  -.3466461E-01  -.3493568E-01  -.3370085E-01
  -.3287696E-01  -.3364222E-01  -.3579465E-01  -.3819615E-01  -.4010228E-01
  -.4187571E-01  -.4377712E-01  -.4505521E-01  -.4480662E-01  -.4325253E-01
  -.4162026E-01  -.4062626E-01  -.3995316E-01  -.3910989E-01  -.3811855E-01
  -.3715600E-01  -.3587223E-01  -.3386118E-01  -.3128411E-01  -.2920197E-01
  -.2882137E-01  -.3002421E-01  -.3105965E-01  -.3011660E-01  -.2713008E-01
  -.2377568E-01  -.2178725E-01  -.2153694E-01  -.2216130E-01  -.2246732E-01
  -.2157849E-01  -.1947402E-01  -.1710010E-01  -.1570764E-01  -.1569134E-01
  -.1619596E-01  -.1594026E-01  -.1445268E-01  -.1224877E-01  -.1005542E-01
  -.8399184E-02  -.7701986E-02  -.7928486E-02  -.8466842E-02  -.8669806E-02
  -.8147292E-02  -.6628716E-02  -.3996374E-02  -.6186059E-03   .2610634E-02
   .4859641E-02   .5607879E-02   .4570820E-02   .2014784E-02  -.1202915E-02
  -.4403223E-02  -.7299607E-02  -.9822706E-02  -.1193416E-01  -.1393727E-01
  -.1590239E-01  -.1730305E-01  -.1771026E-01  -.1757134E-01  -.1784420E-01
  -.1907983E-01  -.2111102E-01  -.2338351E-01  -.2504461E-01  -.2513187E-01
  -.2330172E-01  -.2009622E-01  -.1668549E-01  -.1421173E-01  -.1321756E-01
  -.1335743E-01  -.1371518E-01  -.1351202E-01  -.1260608E-01  -.1138374E-01
  -.1024113E-01  -.9156608E-02  -.7923991E-02  -.6310040E-02  -.4212350E-02
  -.1656013E-02   .9493791E-03   .2676247E-02   .2676925E-02   .7540098E-03
  -.2812917E-02  -.7230793E-02  -.1168618E-01  -.1544427E-01  -.1776805E-01
  -.1841592E-01  -.1811997E-01  -.1807067E-01  -.1873488E-01  -.1967852E-01
  -.2067097E-01  -.2193097E-01  -.2367362E-01  -.2589662E-01  -.2829384E-01
  -.3024619E-01  -.3112610E-01  -.3086580E-01  -.2990931E-01  -.2862754E-01
  -.2694549E-01  -.2488235E-01  -.2251982E-01  -.1982329E-01  -.1707041E-01
  -.1488601E-01  -.1354010E-01  -.1232256E-01  -.1040912E-01  -.7921679E-02
  -.5762232E-02  -.4627380E-02  -.4309076E-02  -.4164357E-02  -.3872806E-02
  -.3305947E-02  -.2361888E-02  -.1259801E-02  -.4816467E-03  -.1138432E-03
   .1707553E-04  -.1800523E-03  -.8973687E-03  -.2150241E-02  -.3842060E-02
  -.6106716E-02  -.8811746E-02  -.1135039E-01  -.1299303E-01  -.1358458E-01
  -.1324405E-01  -.1233626E-01  -.1145540E-01  -.1118601E-01  -.1181631E-01
  -.1310044E-01  -.1414193E-01  -.1413070E-01  -.1336742E-01  -.1289549E-01
  -.1327987E-01  -.1432128E-01  -.1565997E-01  -.1709783E-01  -.1833956E-01
  -.1908952E-01  -.1946303E-01  -.1980182E-01  -.2008993E-01  -.2000655E-01
  -.1950358E-01  -.1894236E-01  -.1857903E-01  -.1853512E-01  -.1865629E-01
  -.1861533E-01  -.1816176E-01  -.1739338E-01  -.1690309E-01  -.1728103E-01
  -.1820026E-01  -.1863851E-01  -.1792762E-01  -.1609342E-01  -.1370898E-01
  -.1170975E-01  -.1087562E-01  -.1110204E-01  -.1157358E-01  -.1135959E-01
  -.1004376E-01  -.8054468E-02  -.6390000E-02  -.5826991E-02  -.6217676E-02
  -.6619866E-02  -.6005089E-02  -.4111510E-02  -.1390422E-02   .1553941E-02
   .4334898E-02   .6880878E-02   .9590564E-02   .1302235E-01   .1710857E-01
   .2121111E-01   .2487247E-01   .2788324E-01   .3000328E-01   .3119551E-01
   .3171108E-01   .3208753E-01   .3278862E-01   .3401689E-01   .3534139E-01
   .3584433E-01   .3506970E-01   .3353905E-01   .3211811E-01   .3139165E-01
   .3147572E-01   .3198891E-01   .3212319E-01   .3127610E-01   .2946412E-01
   .2697066E-01   .2429086E-01   .2190993E-01   .2026496E-01   .1966902E-01
   .1995515E-01   .2045306E-01   .2061008E-01   .2042423E-01   .2026115E-01
   .2018736E-01   .1989774E-01   .1909932E-01   .1807115E-01   .1722184E-01
   .1672875E-01   .1667069E-01   .1686053E-01   .1693931E-01   .1647545E-01
   .1506833E-01   .1257852E-01   .9622133E-02   .7403051E-02   .6719381E-02
   .7463268E-02   .9128277E-02   .1123618E-01   .1362018E-01   .1625811E-01
   .1872438E-01   .2031225E-01   .2036685E-01   .1856480E-01   .1529295E-01
   .1175571E-01   .9332432E-02   .8590653E-02   .9091501E-02   .1012659E-01
   .1149062E-01   .1320653E-01   .1511164E-01   .1704513E-01   .1889346E-01
   .2060069E-01   .2237600E-01   .2443809E-01   .2673387E-01   .2851473E-01
   .2891743E-01   .2832621E-01   .2826963E-01   .2950802E-01   .3100198E-01
   .3113634E-01   .2933947E-01   .2673690E-01   .2515740E-01   .2530298E-01
   .2596135E-01   .2575956E-01   .2504889E-01   .2450059E-01   .2284342E-01
   .1870113E-01   .1322681E-01   .8761614E-02   .5894052E-02   .3636322E-02
   .1847960E-02   .1006056E-02   .1047457E-03  -.2719769E-02  -.7207834E-02
  -.1085809E-01  -.1239833E-01  -.1322424E-01  -.1487888E-01  -.1715049E-01
  -.1888322E-01  -.1968095E-01  -.1981699E-01  -.1912294E-01  -.1714304E-01
  -.1400892E-01  -.1048546E-01  -.7336649E-02  -.5161458E-02  -.4569938E-02
  -.5781929E-02  -.8161867E-02  -.1052709E-01  -.1199229E-01  -.1212332E-01
  -.1115870E-01  -.1014602E-01  -.1015098E-01  -.1165593E-01  -.1429783E-01
  -.1689986E-01  -.1824410E-01  -.1795048E-01  -.1649412E-01  -.1474407E-01
  -.1369267E-01  -.1412161E-01  -.1554035E-01  -.1604423E-01  -.1431138E-01
  -.1118886E-01  -.8798048E-02  -.8638301E-02  -.1020231E-01  -.1101282E-01
  -.9062228E-02  -.5131596E-02  -.2042329E-02  -.1758514E-02  -.3933153E-02
  -.7184770E-02  -.1032834E-01  -.1230048E-01  -.1233051E-01  -.1020663E-01
  -.6229578E-02  -.1575040E-02   .1681602E-02   .2030734E-02   .4798622E-03
  -.3656083E-03   .8769763E-03   .3352339E-02   .5475398E-02   .6439818E-02
   .6223750E-02   .5111190E-02   .3588905E-02   .1982192E-02   .1701913E-03
  -.1603807E-02  -.2430198E-02  -.1470341E-02   .1267477E-02   .4411057E-02
   .6225221E-02   .5862563E-02   .3683040E-02   .9701147E-03  -.1051017E-02
  -.2033912E-02  -.2400464E-02  -.2802131E-02  -.3715528E-02  -.4953246E-02
  -.5775783E-02  -.5623197E-02  -.4682874E-02  -.3629626E-02  -.2999587E-02
  -.2963260E-02  -.3444153E-02  -.4344882E-02  -.5328244E-02  -.5679266E-02
  -.4992836E-02  -.3886204E-02  -.3530741E-02  -.4115567E-02  -.4844400E-02
  -.5139416E-02  -.4407900E-02  -.1828073E-02   .2054036E-02   .4853786E-02
   .5019896E-02   .3720928E-02   .2989598E-02   .3105762E-02   .2849383E-02
   .1933631E-02   .1317554E-02   .1400807E-02   .1664338E-02   .1860444E-02
   .2729774E-02   .4626615E-02   .6507462E-02   .6896308E-02   .5365972E-02
   .2779943E-02  -.1187202E-04  -.2542056E-02  -.3827736E-02  -.3245412E-02
  -.1793136E-02  -.1075439E-02  -.1345433E-02  -.1624091E-02  -.1418212E-02
  -.1163570E-02  -.1477836E-02  -.2395020E-02  -.3566607E-02  -.4723863E-02
  -.5837243E-02  -.7197185E-02  -.8972670E-02  -.1103478E-01  -.1290107E-01
  -.1387688E-01  -.1358204E-01  -.1219049E-01  -.1015786E-01  -.7759729E-02
  -.5314320E-02  -.3203168E-02  -.1634728E-02  -.5459612E-03   .3588364E-03
   .1525982E-02   .3330539E-02   .5757508E-02   .8158912E-02   .9612211E-02
   .9771547E-02   .9023831E-02   .7939133E-02   .7011423E-02   .6541542E-02
   .6482739E-02   .6426607E-02   .5946433E-02   .5178968E-02   .4737392E-02
   .5111202E-02   .5990654E-02   .6422355E-02   .5771229E-02   .4337448E-02
   .2892648E-02   .1974350E-02   .1604918E-02   .1507086E-02   .1627423E-02
   .2175180E-02   .3249307E-02   .4480457E-02   .5387758E-02   .5370836E-02
   .4024097E-02   .1732477E-02  -.5961110E-03  -.2293291E-02  -.3280020E-02
  -.3956254E-02  -.4767401E-02  -.5943717E-02  -.7260425E-02  -.8055980E-02
  -.7797042E-02  -.6788391E-02  -.6018282E-02  -.5972639E-02  -.6191699E-02
  -.6037725E-02  -.5606710E-02  -.5450309E-02  -.5732409E-02  -.6313129E-02
  -.7071685E-02  -.7881805E-02  -.8524289E-02  -.9084651E-02  -.9899829E-02
  -.1126483E-01  -.1291780E-01  -.1389036E-01  -.1323445E-01  -.1129813E-01
  -.9617912E-02  -.9453537E-02  -.1028617E-01  -.1036623E-01  -.9146674E-02
  -.7830248E-02  -.7371716E-02  -.7486743E-02  -.7827714E-02  -.8453081E-02
  -.8692321E-02  -.7275888E-02  -.4123299E-02  -.7753697E-03   .1173002E-02
   .1344734E-02   .1890532E-03  -.1612260E-02  -.3182506E-02  -.3749362E-02
  -.3103736E-02  -.1937666E-02  -.1180145E-02  -.9506285E-03  -.4793644E-03
   .9130685E-03   .3121381E-02   .5562184E-02   .7602478E-02   .9118940E-02
   .1040182E-01   .1147923E-01   .1183529E-01   .1107401E-01   .9831422E-02
   .9327833E-02   .1021211E-01   .1239849E-01   .1535996E-01   .1847438E-01
   .2135415E-01   .2368687E-01   .2540790E-01   .2684676E-01   .2857607E-01
   .3090003E-01   .3345094E-01   .3554760E-01   .3689453E-01   .3777475E-01
   .3838979E-01   .3861090E-01   .3836703E-01   .3783160E-01   .3676746E-01
   .3492630E-01   .3257805E-01   .3022031E-01   .2801251E-01   .2610480E-01
   .2510497E-01   .2497991E-01   .2453546E-01   .2321647E-01   .2240701E-01
   .2321453E-01   .2424921E-01   .2359439E-01   .2180402E-01   .2107731E-01
   .2210275E-01   .2315845E-01   .2265899E-01   .2094681E-01   .1887932E-01
   .1634487E-01   .1280409E-01   .8600792E-02   .4670493E-02   .1301228E-02
  -.1903896E-02  -.4896385E-02  -.6863462E-02  -.6999181E-02  -.5658116E-02
  -.4123766E-02  -.3235019E-02  -.2478788E-02  -.8284896E-03   .1763332E-02
   .4747061E-02   .7931702E-02   .1151651E-01   .1527201E-01   .1832858E-01
   .2001454E-01   .2058312E-01   .2098533E-01   .2196238E-01   .2343277E-01
   .2479588E-01   .2544642E-01   .2506510E-01   .2353359E-01   .2127529E-01
   .1943874E-01   .1909685E-01   .2019367E-01   .2195252E-01   .2406365E-01
   .2660186E-01   .2931051E-01   .3170039E-01   .3351484E-01   .3429315E-01
   .3304010E-01   .2923655E-01   .2368473E-01   .1786602E-01   .1311289E-01
   .9976605E-02   .8138374E-02   .6917036E-02   .5720891E-02   .4507993E-02
   .3559300E-02   .3198826E-02   .3171798E-02   .2758788E-02   .1543494E-02
  -.2650555E-03  -.2269032E-02  -.4348789E-02  -.6480182E-02  -.8349495E-02
  -.9500392E-02  -.9785551E-02  -.9623144E-02  -.9717639E-02  -.1060402E-01
  -.1221323E-01  -.1408720E-01  -.1568656E-01  -.1666079E-01  -.1720773E-01
  -.1769256E-01  -.1826179E-01  -.1879985E-01  -.1904484E-01  -.1874269E-01
  -.1758170E-01  -.1546792E-01  -.1263703E-01  -.9735854E-02  -.7306434E-02
  -.5338179E-02  -.3635141E-02  -.2340774E-02  -.1605633E-02  -.1162515E-02
  -.8894754E-03  -.1015764E-02  -.1763036E-02  -.3077554E-02  -.4686549E-02
  -.6724380E-02  -.9428324E-02  -.1255742E-01  -.1539262E-01  -.1734612E-01
  -.1845488E-01  -.1903212E-01  -.1927393E-01  -.1880060E-01  -.1687332E-01
  -.1329685E-01  -.8673647E-02  -.4187894E-02  -.1170610E-02  -.4528291E-03
  -.1675869E-02  -.3010664E-02  -.2514932E-02  -.2096789E-03   .1499612E-02
   .2691021E-03  -.4113741E-02  -.9870087E-02  -.1470044E-01  -.1744959E-01
  -.1826915E-01  -.1775942E-01  -.1655139E-01  -.1544607E-01  -.1496533E-01
  -.1480786E-01  -.1379549E-01  -.1105529E-01  -.7115064E-02  -.3872963E-02
  -.3102549E-02  -.4940948E-02  -.7592637E-02  -.8587604E-02  -.6757388E-02
  -.3247533E-02  -.5305769E-03   .9373761E-04  -.6489822E-03  -.9374513E-03
   .7244230E-03   .4400471E-02   .8860279E-02   .1247743E-01   .1444852E-01
   .1498019E-01   .1467865E-01   .1412121E-01   .1392472E-01   .1448215E-01
   .1564237E-01   .1714052E-01   .1867392E-01   .2014911E-01   .2146466E-01
   .2242942E-01   .2277912E-01   .2210564E-01   .2032249E-01   .1773422E-01
   .1467677E-01   .1157194E-01   .8992323E-02   .7598206E-02   .7513465E-02
   .7991701E-02   .8080327E-02   .7488113E-02   .6621585E-02   .5728597E-02
   .4597851E-02   .3192807E-02   .2208966E-02   .2199230E-02   .2683989E-02
   .2529130E-02   .1094652E-02  -.9286223E-03  -.2261568E-02  -.2092863E-02
  -.9249931E-03  -.3576027E-03  -.1822313E-02  -.4935958E-02  -.7557427E-02
  -.7509721E-02  -.4562101E-02  -.6852125E-03   .1713423E-02   .1774138E-02
   .6474896E-03   .6246185E-04   .8758219E-03   .2544982E-02   .3536288E-02
   .2568111E-02  -.4147698E-03  -.4239945E-02  -.7260460E-02  -.8323753E-02
  -.7176576E-02  -.4561199E-02  -.1759243E-02   .5061328E-03   .2344948E-02
   .4285430E-02   .6965054E-02   .1074773E-01   .1529564E-01   .1973733E-01
   .2340460E-01   .2625915E-01   .2862876E-01   .3090909E-01   .3330464E-01
   .3567628E-01   .3736494E-01   .3738257E-01   .3545137E-01   .3254591E-01
   .3000320E-01   .2856265E-01   .2782425E-01   .2676137E-01   .2473171E-01
   .2209500E-01   .1957265E-01   .1773736E-01   .1710757E-01   .1773325E-01
   .1911601E-01   .2067133E-01   .2177468E-01   .2225065E-01   .2241188E-01
   .2260483E-01   .2266343E-01   .2226676E-01   .2139914E-01   .1994328E-01
   .1771671E-01   .1483449E-01   .1168632E-01   .8852662E-02   .6936048E-02
   .6168757E-02   .6188566E-02   .6229678E-02   .5758375E-02   .4778666E-02
   .3502931E-02   .2197699E-02   .1328417E-02   .1374712E-02   .2296136E-02
   .3405465E-02   .4010401E-02   .4074098E-02   .3938710E-02   .3772960E-02
   .3428951E-02   .2675996E-02   .1469838E-02   .2530122E-03  -.1087431E-03
   .7285672E-03   .1971766E-02   .2361365E-02   .1394517E-02  -.3666670E-03
  -.1654700E-02  -.1492080E-02   .1890683E-03   .2805237E-02   .5676657E-02
   .8229204E-02   .9936422E-02   .1081235E-01   .1160571E-01   .1281503E-01
   .1393810E-01   .1451259E-01   .1484122E-01   .1522839E-01   .1551311E-01
   .1556839E-01   .1587518E-01   .1681589E-01   .1791339E-01   .1829029E-01
   .1748949E-01   .1582464E-01   .1420288E-01   .1347246E-01   .1350785E-01
   .1349209E-01   .1324905E-01   .1323609E-01   .1381105E-01   .1479692E-01
   .1584026E-01   .1709163E-01   .1899040E-01   .2151397E-01   .2399175E-01
   .2566445E-01   .2642640E-01   .2646072E-01   .2579603E-01   .2461967E-01
   .2349482E-01   .2297015E-01   .2312182E-01   .2356753E-01   .2374401E-01
   .2326727E-01   .2212989E-01   .2099924E-01   .2065903E-01   .2088277E-01
   .2082603E-01   .2028686E-01   .1967020E-01   .1923859E-01   .1889113E-01
   .1856249E-01   .1816903E-01   .1761541E-01   .1695041E-01   .1616246E-01
   .1548367E-01   .1529296E-01   .1547223E-01   .1541166E-01   .1452694E-01
   .1294415E-01   .1137967E-01   .1035264E-01   .9780318E-02   .9277281E-02
   .8697089E-02   .8125036E-02   .7640824E-02   .7287322E-02   .7129621E-02
   .7156819E-02   .7197928E-02   .7039100E-02   .6576150E-02   .5970272E-02
   .5563988E-02   .5640774E-02   .6261383E-02   .7236883E-02   .8211180E-02
   .8809308E-02   .8850735E-02   .8236869E-02   .6979764E-02   .5461132E-02
   .4212978E-02   .3710668E-02   .4190407E-02   .5230276E-02   .6152923E-02
   .6543533E-02   .6524259E-02   .6861886E-02   .8050695E-02   .9469465E-02
   .1004674E-01   .9502778E-02   .8745418E-02   .8721675E-02   .9585254E-02
   .1097868E-01   .1259438E-01   .1416959E-01   .1538716E-01   .1590111E-01
   .1553610E-01   .1455592E-01   .1340598E-01   .1220166E-01   .1088556E-01
   .9838972E-02   .9373637E-02   .9317404E-02   .9433054E-02   .9717242E-02
   .1025309E-01   .1083193E-01   .1105563E-01   .1062874E-01   .9625718E-02
   .8446996E-02   .7288071E-02   .6236561E-02   .5294978E-02   .4381985E-02
   .3634050E-02   .3210380E-02   .3055468E-02   .3200995E-02   .3781072E-02
   .4424709E-02   .4562605E-02   .4269686E-02   .4068457E-02   .4249932E-02
   .4687466E-02   .5145005E-02   .5332851E-02   .4867995E-02   .3716018E-02
   .2534909E-02   .2065740E-02   .2565416E-02   .3776560E-02   .5114861E-02
   .6202886E-02   .7262089E-02   .8655466E-02   .1017554E-01   .1144828E-01
   .1217079E-01   .1227142E-01   .1195000E-01   .1126079E-01   .1039409E-01
   .9938567E-02   .1045329E-01   .1185738E-01   .1353609E-01   .1477314E-01
   .1539904E-01   .1568061E-01   .1566081E-01   .1510847E-01   .1389447E-01
   .1219669E-01   .1037977E-01   .8767114E-02   .7620903E-02   .6947817E-02
   .6482988E-02   .5948545E-02   .5288828E-02   .4334287E-02   .2920993E-02
   .1148657E-02  -.6364173E-03  -.2107541E-02  -.3332654E-02  -.4722814E-02
  -.6453981E-02  -.8258341E-02  -.9688109E-02  -.1046881E-01  -.1086605E-01
  -.1127423E-01  -.1173489E-01  -.1218130E-01  -.1248304E-01  -.1244780E-01
  -.1197248E-01  -.1110399E-01  -.9871681E-02  -.8116291E-02  -.5893965E-02
  -.3816331E-02  -.2579140E-02  -.2150602E-02  -.2054538E-02  -.1843387E-02
  -.1071059E-02   .4015033E-03   .2311847E-02   .3950667E-02   .4789030E-02
   .4841110E-02   .4351125E-02   .3628249E-02   .3002916E-02   .2763336E-02
   .2862472E-02   .2749265E-02   .2062458E-02   .9646593E-03  -.1496853E-03
  -.1346824E-02  -.3016508E-02  -.5035007E-02  -.6998132E-02  -.8651255E-02
  -.1016825E-01  -.1159241E-01  -.1260744E-01  -.1321757E-01  -.1405764E-01
  -.1565971E-01  -.1789372E-01  -.2034068E-01  -.2259557E-01  -.2434013E-01
  -.2539678E-01  -.2591341E-01  -.2630251E-01  -.2715385E-01  -.2858534E-01
  -.3005975E-01  -.3093875E-01  -.3111156E-01  -.3109266E-01  -.3125678E-01
  -.3133746E-01  -.3099155E-01  -.3032283E-01  -.2982745E-01  -.3014656E-01
  -.3134553E-01  -.3234530E-01  -.3220119E-01  -.3123478E-01  -.3034453E-01
  -.2989023E-01  -.2964828E-01  -.2942961E-01  -.2899735E-01  -.2834582E-01
  -.2759332E-01  -.2687011E-01  -.2618368E-01  -.2519220E-01  -.2368085E-01
  -.2173218E-01  -.1955323E-01  -.1726318E-01  -.1485931E-01  -.1247073E-01
  -.1010381E-01  -.7620395E-02  -.5363834E-02  -.3796261E-02  -.2964084E-02
  -.2420019E-02  -.1865704E-02  -.1351952E-02  -.1007604E-02  -.8776971E-03
  -.7616998E-03  -.4768623E-03  -.1532853E-03   .2625733E-03   .1138392E-02
   .2572268E-02   .4259388E-02   .5624436E-02   .6203929E-02   .6124157E-02
   .5759621E-02   .5082861E-02   .3976816E-02   .2755559E-02   .1738121E-02
   .8225808E-03  -.2905010E-03  -.1763066E-02  -.3529925E-02  -.5319521E-02
  -.6933100E-02  -.8462449E-02  -.1014361E-01  -.1199550E-01  -.1388065E-01
  -.1563105E-01  -.1709707E-01  -.1808061E-01  -.1833641E-01  -.1788892E-01
  -.1700311E-01  -.1585075E-01  -.1479042E-01  -.1450126E-01  -.1521644E-01
  -.1620521E-01  -.1659112E-01  -.1633912E-01  -.1591144E-01  -.1558390E-01
  -.1530784E-01  -.1502103E-01  -.1493130E-01  -.1515662E-01  -.1530577E-01
  -.1502354E-01  -.1451062E-01  -.1418620E-01  -.1431116E-01  -.1488118E-01
  -.1557872E-01  -.1593221E-01  -.1567123E-01  -.1461446E-01  -.1281273E-01
  -.1075354E-01  -.9066411E-02  -.7936276E-02  -.7211751E-02  -.7052597E-02
  -.7902795E-02  -.9605552E-02  -.1111054E-01  -.1133749E-01  -.1019025E-01
  -.8404502E-02  -.6739625E-02  -.5358262E-02  -.3743470E-02  -.1320480E-02
   .1837657E-02   .4906538E-02   .6608602E-02   .6108883E-02   .3975191E-02
   .1394560E-02  -.9794413E-03  -.3133464E-02  -.5231155E-02  -.7010183E-02
  -.8092260E-02  -.8362970E-02  -.8154744E-02  -.8020352E-02  -.8455053E-02
  -.9597346E-02  -.1119180E-01  -.1279464E-01  -.1374425E-01  -.1318984E-01
  -.1084819E-01  -.7349708E-02  -.3829853E-02  -.1234043E-02   .2576647E-04
   .1329902E-03  -.3217429E-03  -.9030968E-03  -.1913328E-02  -.3969936E-02
  -.7206421E-02  -.1090582E-01  -.1413505E-01  -.1638710E-01  -.1771277E-01
  -.1844174E-01  -.1876890E-01  -.1872403E-01  -.1845083E-01  -.1848677E-01
  -.1929280E-01  -.2069416E-01  -.2223350E-01  -.2350384E-01  -.2417239E-01
  -.2400824E-01  -.2313619E-01  -.2207045E-01  -.2129916E-01  -.2105528E-01
  -.2103418E-01  -.2047846E-01  -.1892204E-01  -.1651534E-01  -.1364940E-01
  -.1071980E-01  -.8223939E-02  -.6665426E-02  -.6135058E-02  -.6073275E-02
  -.5815560E-02  -.5090638E-02  -.4339531E-02  -.4147177E-02  -.4515520E-02
  -.5057005E-02  -.5560903E-02  -.6124381E-02  -.6698501E-02  -.6836001E-02
  -.6171463E-02  -.4862849E-02  -.3595126E-02  -.2977595E-02  -.3220998E-02
  -.3972209E-02  -.4568303E-02  -.4821590E-02  -.4878213E-02  -.5042357E-02
  -.5484174E-02  -.6061688E-02  -.6447187E-02  -.6235566E-02  -.5055736E-02
  -.3045943E-02  -.7814646E-03   .1128343E-02   .2051151E-02   .1603063E-02
   .2591396E-03  -.6306642E-03  -.6329049E-04   .1633015E-02   .3426093E-02
   .4513216E-02   .4618437E-02   .3993813E-02   .3079491E-02   .1926967E-02
   .1811889E-03  -.2333748E-02  -.5646531E-02  -.9326034E-02  -.1226598E-01
  -.1380322E-01  -.1412142E-01  -.1385491E-01  -.1355439E-01  -.1331134E-01
  -.1304556E-01  -.1279708E-01  -.1255402E-01  -.1223558E-01  -.1200229E-01
  -.1203593E-01  -.1210665E-01  -.1190765E-01  -.1137488E-01  -.1057058E-01
  -.9452908E-02  -.7942751E-02  -.6235855E-02  -.4626620E-02  -.3107306E-02
  -.1609239E-02  -.2663882E-03   .7239351E-03   .1307662E-02   .1670870E-02
   .1849564E-02   .1657882E-02   .1134625E-02   .7019654E-03   .7742644E-03
   .1281615E-02   .1844318E-02   .2111580E-02   .1894354E-02   .1090924E-02
  -.3657162E-03  -.2358060E-02  -.4645424E-02  -.6928399E-02  -.9007222E-02
  -.1067472E-01  -.1187802E-01  -.1267864E-01  -.1277380E-01  -.1163101E-01
  -.9151918E-02  -.6161951E-02  -.3998645E-02  -.3186266E-02  -.2934165E-02
  -.2078374E-02  -.3185237E-03   .1822129E-02   .3562648E-02   .4293491E-02
   .3916134E-02   .2713104E-02   .1185108E-02  -.2233031E-03  -.1323256E-02
  -.2097675E-02  -.2628152E-02  -.3015812E-02  -.3437020E-02  -.4151261E-02
  -.5392237E-02  -.7193720E-02  -.9079266E-02  -.1036504E-01  -.1066116E-01
  -.9983903E-02  -.8591124E-02  -.6808689E-02  -.4902775E-02  -.3236070E-02
  -.2075593E-02  -.1360779E-02  -.1213731E-02  -.1661847E-02  -.2298433E-02
  -.2606092E-02  -.2280144E-02  -.1506998E-02  -.7098515E-03  -.1671375E-03
   .8555283E-04   .4056638E-03   .1094977E-02   .1928239E-02   .2501804E-02
   .2719899E-02   .2812665E-02   .2835939E-02   .2781964E-02   .2557525E-02
   .1987148E-02   .9236422E-03  -.7743938E-03  -.2976199E-02  -.5251946E-02
  -.7257874E-02  -.8903725E-02  -.1026023E-01  -.1144363E-01  -.1247811E-01
  -.1322728E-01  -.1364222E-01  -.1368964E-01  -.1328128E-01  -.1241073E-01
  -.1128119E-01  -.1005755E-01  -.8865300E-02  -.7909156E-02  -.7363809E-02
  -.7320874E-02  -.7611816E-02  -.7742431E-02  -.7359323E-02  -.6516831E-02
  -.5583833E-02  -.4691306E-02  -.3782595E-02  -.3009322E-02  -.2598727E-02
  -.2670941E-02  -.3234087E-02  -.4209005E-02  -.5363552E-02  -.6277559E-02
  -.6658635E-02  -.6585174E-02  -.6250661E-02  -.5809027E-02  -.5647030E-02
  -.6230377E-02  -.7346268E-02  -.8303487E-02  -.8821774E-02  -.9317396E-02
  -.1011163E-01  -.1096543E-01  -.1141091E-01  -.1121793E-01  -.1057922E-01
  -.9851679E-02  -.9312113E-02  -.8970664E-02  -.8633392E-02  -.8320540E-02
  -.8112915E-02  -.7965005E-02  -.7833553E-02  -.7618810E-02  -.7147254E-02
  -.6254634E-02  -.5277928E-02  -.4909677E-02  -.5558207E-02  -.6911990E-02
  -.8521814E-02  -.1031338E-01  -.1220734E-01  -.1375178E-01  -.1449634E-01
  -.1457515E-01  -.1452206E-01  -.1475524E-01  -.1524191E-01  -.1570522E-01
  -.1596581E-01  -.1587907E-01  -.1524895E-01  -.1412626E-01  -.1282483E-01
  -.1147888E-01  -.1012140E-01  -.8986673E-02  -.8366938E-02  -.8163988E-02
  -.7973920E-02  -.7717673E-02  -.7679706E-02  -.8221910E-02  -.9551262E-02
  -.1136528E-01  -.1306794E-01  -.1428052E-01  -.1515118E-01  -.1607915E-01
  -.1722396E-01  -.1837586E-01  -.1910880E-01  -.1889272E-01  -.1755603E-01
  -.1527122E-01  -.1230235E-01  -.9591906E-02  -.8067418E-02  -.7826027E-02
  -.8359010E-02  -.9171345E-02  -.9972748E-02  -.1050403E-01  -.1060598E-01
  -.1019288E-01  -.9327119E-02  -.8269568E-02  -.7325512E-02  -.6583846E-02
  -.5942939E-02  -.5575752E-02  -.5564610E-02  -.5667597E-02  -.5709940E-02
  -.5694597E-02  -.5498663E-02  -.5036550E-02  -.4396472E-02  -.3569803E-02
  -.2649232E-02  -.1965034E-02  -.1689830E-02  -.1668833E-02  -.1672789E-02
  -.1555474E-02  -.1348906E-02  -.1110900E-02  -.7960772E-03  -.2000991E-03
   .7616371E-03   .1827407E-02   .2722051E-02   .3422511E-02   .4179972E-02
   .5185942E-02   .6306859E-02   .7331446E-02   .7915407E-02   .8024007E-02
   .8009482E-02   .8021141E-02   .7981268E-02   .8018295E-02   .8225576E-02
   .8433207E-02   .8178140E-02   .7374850E-02   .6356641E-02   .5260508E-02
   .4030870E-02   .2710314E-02   .1615209E-02   .1036688E-02   .1071442E-02
   .1678446E-02   .2627490E-02   .3573349E-02   .4309668E-02   .4605618E-02
   .4100311E-02   .2712794E-02   .8143323E-03  -.1060983E-02  -.2550591E-02
  -.3529090E-02  -.4077188E-02  -.4522012E-02  -.5108968E-02  -.5571401E-02
  -.5275776E-02  -.3860001E-02  -.1669001E-02   .3108010E-03   .1178194E-02
   .7696275E-03  -.4811646E-03  -.1789148E-02  -.2661771E-02  -.3143880E-02
  -.3408336E-02  -.3578384E-02  -.3429144E-02  -.2593951E-02  -.8259641E-03
   .1868667E-02   .5075037E-02   .8056221E-02   .1015283E-01   .1123611E-01
   .1173507E-01   .1214840E-01   .1243834E-01   .1218641E-01   .1127978E-01
   .1001274E-01   .8797310E-02   .8119919E-02   .8146705E-02   .8689780E-02
   .9391915E-02   .9965450E-02   .1041852E-01   .1073190E-01   .1078180E-01
   .1043305E-01   .9631620E-02   .8661196E-02   .7922332E-02   .7665237E-02
   .7976918E-02   .8843320E-02   .1006555E-01   .1128949E-01   .1220645E-01
   .1278090E-01   .1313018E-01   .1300899E-01   .1232218E-01   .1153046E-01
   .1109629E-01   .1101660E-01   .1093050E-01   .1055319E-01   .9888267E-02
   .9135569E-02   .8250523E-02   .7006966E-02   .5417998E-02   .3525317E-02
   .1696823E-02   .6581258E-03   .7854340E-03   .1955952E-02   .3784940E-02
   .5727424E-02   .7137866E-02   .7627187E-02   .7352477E-02   .6620616E-02
   .5805198E-02   .5100062E-02   .4473625E-02   .3930007E-02   .3611676E-02
   .3770981E-02   .4285109E-02   .4550538E-02   .4082193E-02   .3065173E-02
   .1914330E-02   .7530453E-03  -.6345617E-03  -.2535123E-02  -.4954405E-02
  -.7665123E-02  -.1000092E-01  -.1130482E-01  -.1156761E-01  -.1106053E-01
  -.1008626E-01  -.8987071E-02  -.7896590E-02  -.6485191E-02  -.4671478E-02
  -.2957692E-02  -.2185137E-02  -.2909769E-02  -.4992444E-02  -.7447829E-02
  -.8877072E-02  -.8697223E-02  -.7386555E-02  -.6056723E-02  -.5432157E-02
  -.5037694E-02  -.3978857E-02  -.2072841E-02   .1508534E-03   .2072673E-02
   .3384793E-02   .3856646E-02   .3431739E-02   .2522381E-02   .1960868E-02
   .1999967E-02   .2079430E-02   .1762618E-02   .1053110E-02  -.1300006E-03
  -.1782985E-02  -.3336414E-02  -.4162016E-02  -.3999345E-02  -.3251409E-02
  -.2612991E-02  -.2418536E-02  -.2451913E-02  -.2123898E-02  -.1186535E-02
  -.2865643E-04   .7830329E-03   .9338606E-03   .6583120E-03   .3337609E-03
   .1399259E-03   .2135993E-03   .5429418E-03   .8207310E-03   .7815104E-03
   .2917889E-03  -.4808168E-03  -.9345555E-03  -.5691835E-03   .2942793E-03
   .9219183E-03   .1008146E-02   .5295061E-03  -.4881281E-03  -.1665608E-02
  -.2587057E-02  -.3318147E-02  -.4025195E-02  -.4701109E-02  -.5528531E-02
  -.6778679E-02  -.8434675E-02  -.1002991E-01  -.1105756E-01  -.1138575E-01
  -.1140423E-01  -.1157712E-01  -.1198160E-01  -.1220262E-01  -.1169902E-01
  -.1041056E-01  -.8736364E-02  -.7127229E-02  -.6033343E-02  -.5591142E-02
  -.5500990E-02  -.5237816E-02  -.4597955E-02  -.3902450E-02  -.3684750E-02
  -.4317330E-02  -.5818365E-02  -.7767598E-02  -.9404344E-02  -.1030978E-01
  -.1048553E-01  -.1032802E-01  -.1026830E-01  -.1040351E-01  -.1053553E-01
  -.1050620E-01  -.1018822E-01  -.9502669E-02  -.8723026E-02  -.8314760E-02
  -.8652143E-02  -.9679535E-02  -.1105147E-01  -.1234106E-01  -.1338652E-01
  -.1418004E-01  -.1464103E-01  -.1481104E-01  -.1479117E-01  -.1465068E-01
  -.1442023E-01  -.1417889E-01  -.1413784E-01  -.1427122E-01  -.1448772E-01
  -.1479365E-01  -.1502861E-01  -.1494965E-01  -.1459670E-01  -.1407966E-01
  -.1346385E-01  -.1287100E-01  -.1229055E-01  -.1169524E-01  -.1100271E-01
  -.1021812E-01  -.9644265E-02  -.9420839E-02  -.9365902E-02  -.9472462E-02
  -.9707301E-02  -.9917696E-02  -.9870171E-02  -.9366279E-02  -.8457603E-02
  -.7256800E-02  -.5874712E-02  -.4592319E-02  -.3678996E-02  -.3119015E-02
  -.2626657E-02  -.1956071E-02  -.1231895E-02  -.7822824E-03  -.6597517E-03
  -.5790272E-03  -.2878586E-03   .2272154E-03   .8743092E-03   .1574160E-02
   .2195195E-02   .2649353E-02   .2988541E-02   .3361090E-02   .3789408E-02
   .4130164E-02   .4222387E-02   .4049190E-02   .3813426E-02   .3752213E-02
   .4004560E-02   .4521093E-02   .5040145E-02   .5273779E-02   .5060778E-02
   .4501528E-02   .3902652E-02   .3214775E-02   .2256915E-02   .1031211E-02
  -.2446758E-03  -.1334557E-02  -.2129790E-02  -.2508851E-02  -.2514189E-02
  -.2272960E-02  -.2074675E-02  -.2196581E-02  -.2522730E-02  -.2674621E-02
  -.2377011E-02  -.1727045E-02  -.9041437E-03  -.1984519E-03   .1143742E-03
   .7497928E-04  -.3678735E-04   .3031973E-04   .2416113E-03   .4255824E-03
   .6124905E-03   .8554598E-03   .1009469E-02   .8126226E-03   .3112511E-03
   .1169086E-03   .6784995E-03   .1779993E-02   .2966035E-02   .4071955E-02
   .5152447E-02   .6162103E-02   .7151240E-02   .8352459E-02   .9781394E-02
   .1114139E-01   .1207816E-01   .1242496E-01   .1224367E-01   .1167557E-01
   .1092417E-01   .1021089E-01   .9762900E-02   .9647818E-02   .9809170E-02
   .1013276E-01   .1053802E-01   .1089555E-01   .1100526E-01   .1068548E-01
   .9976708E-02   .9120837E-02   .8278286E-02   .7665416E-02   .7543305E-02
   .7941926E-02   .8741077E-02   .9829726E-02   .1098776E-01   .1205724E-01
   .1301895E-01   .1376492E-01   .1412601E-01   .1424022E-01   .1434900E-01
   .1458566E-01   .1503005E-01   .1559644E-01   .1619959E-01   .1684437E-01
   .1751165E-01   .1810531E-01   .1841633E-01   .1819037E-01   .1729693E-01
   .1580831E-01   .1406098E-01   .1239674E-01   .1077372E-01   .8969199E-02
   .7127018E-02   .5565584E-02   .4467712E-02   .3853654E-02   .3632112E-02
   .3543244E-02   .3431409E-02   .3313457E-02   .3232821E-02   .3384047E-02
   .3925925E-02   .4699627E-02   .5367082E-02   .5797142E-02   .6038665E-02
   .6302701E-02   .6786701E-02   .7368294E-02   .7741625E-02   .7678024E-02
   .7184881E-02   .6468825E-02   .5818602E-02   .5307115E-02   .4872846E-02
   .4643373E-02   .4693517E-02   .4970314E-02   .5275596E-02   .5515285E-02
   .5870000E-02   .6343511E-02   .6568529E-02   .6464612E-02   .6459936E-02
   .6721960E-02   .7068185E-02   .7277047E-02   .7138713E-02   .6730585E-02
   .6234885E-02   .5756045E-02   .5435821E-02   .5466395E-02   .5957440E-02
   .6947785E-02   .8323586E-02   .9762299E-02   .1074646E-01   .1108558E-01
   .1112257E-01   .1116442E-01   .1138416E-01   .1197447E-01   .1313929E-01
   .1467231E-01   .1603230E-01   .1688400E-01   .1721878E-01   .1732054E-01
   .1739558E-01   .1755410E-01   .1806885E-01   .1877985E-01   .1914611E-01
   .1869393E-01   .1745353E-01   .1590844E-01   .1458360E-01   .1385199E-01
   .1359950E-01   .1333767E-01   .1276252E-01   .1207330E-01   .1169609E-01
   .1191936E-01   .1271147E-01   .1374618E-01   .1482358E-01   .1580212E-01
   .1664558E-01   .1729892E-01   .1752651E-01   .1720325E-01   .1670908E-01
   .1655772E-01   .1687698E-01   .1729772E-01   .1739965E-01   .1719635E-01
   .1697876E-01   .1694117E-01   .1713351E-01   .1743110E-01   .1761445E-01
   .1727489E-01   .1626267E-01   .1512425E-01   .1465662E-01   .1519121E-01
   .1641976E-01   .1777433E-01   .1888588E-01   .1960488E-01   .1963578E-01
   .1906682E-01   .1849613E-01   .1834919E-01   .1852881E-01   .1878330E-01
   .1898496E-01   .1913073E-01   .1916258E-01   .1902082E-01   .1876452E-01
   .1843787E-01   .1785369E-01   .1694638E-01   .1582704E-01   .1460060E-01
   .1329624E-01   .1190693E-01   .1059711E-01   .9617881E-02   .9091937E-02
   .9029594E-02   .9296672E-02   .9661561E-02   .9853028E-02   .9750976E-02
   .9425852E-02   .8895525E-02   .8246967E-02   .7623021E-02   .7177036E-02
   .6973741E-02   .6918803E-02   .6996105E-02   .7483343E-02   .8627027E-02
   .1021308E-01   .1175011E-01   .1280798E-01   .1334238E-01   .1348904E-01
   .1340408E-01   .1336588E-01   .1329978E-01   .1301093E-01   .1240993E-01
   .1166932E-01   .1117765E-01   .1106386E-01   .1124211E-01   .1154329E-01
   .1190198E-01   .1229198E-01   .1242674E-01   .1195526E-01   .1098204E-01
   .1002740E-01   .9483932E-02   .9488136E-02   .9768271E-02   .9932751E-02
   .9824969E-02   .9610168E-02   .9489345E-02   .9413204E-02   .9227065E-02
   .8927381E-02   .8592548E-02   .8232522E-02   .7879101E-02   .7742609E-02
   .8037149E-02   .8406052E-02   .8322060E-02   .7675347E-02   .6774217E-02
   .5892613E-02   .5016393E-02   .4134106E-02   .3279890E-02   .2388165E-02
   .1620144E-02   .1261849E-02   .1239637E-02   .1116208E-02   .7305906E-03
   .3328757E-03   .2862007E-03   .8423963E-03   .1847210E-02   .2843757E-02
   .3676027E-02   .4426808E-02   .5349434E-02   .6603597E-02   .7879319E-02
   .8691575E-02   .8981287E-02   .9056782E-02   .9227291E-02   .9597022E-02
   .1018925E-01   .1097622E-01   .1188247E-01   .1262416E-01   .1301727E-01
   .1318163E-01   .1337703E-01   .1372319E-01   .1407610E-01   .1426816E-01
   .1430842E-01   .1423911E-01   .1405299E-01   .1387402E-01   .1363481E-01
   .1300650E-01   .1196081E-01   .1088289E-01   .9794096E-02   .8506288E-02
   .7264001E-02   .6464005E-02   .5870464E-02   .4898450E-02   .3356163E-02
   .1711624E-02   .6483003E-03   .6110228E-03   .1508546E-02   .2662651E-02
   .3351237E-02   .3438224E-02   .3317182E-02   .3343708E-02   .3677308E-02
   .4296172E-02   .4799436E-02   .4818847E-02   .4607548E-02   .4723991E-02
   .5280481E-02   .5783911E-02   .5711925E-02   .4974738E-02   .3983683E-02
   .3203950E-02   .2659595E-02   .2081709E-02   .1386893E-02   .7105970E-03
  -.8664182E-05  -.8548272E-03  -.1768879E-02  -.2523387E-02  -.2896462E-02
  -.2813929E-02  -.2493301E-02  -.2270324E-02  -.2250396E-02  -.2409356E-02
  -.2707570E-02  -.3130350E-02  -.3608594E-02  -.3992562E-02  -.4254808E-02
  -.4258282E-02  -.3948974E-02  -.3680259E-02  -.3916646E-02  -.4471525E-02
  -.4685393E-02  -.4304090E-02  -.3601145E-02  -.3030619E-02  -.2716803E-02
  -.2442372E-02  -.1957895E-02  -.1353231E-02  -.9106581E-03  -.5850483E-03
  -.3742712E-03  -.3449453E-03  -.7564549E-03  -.1560468E-02  -.2227024E-02
  -.2234427E-02  -.1610786E-02  -.6989804E-03   .1911184E-03   .6052765E-03
   .2505701E-03  -.6865260E-03  -.1740655E-02  -.2690852E-02  -.3617717E-02
  -.4684113E-02  -.5790267E-02  -.6522785E-02  -.6630344E-02  -.6213524E-02
  -.5409669E-02  -.4311033E-02  -.3367543E-02  -.3284565E-02  -.4175012E-02
  -.5226317E-02  -.5422934E-02  -.4615588E-02  -.3568006E-02  -.3034498E-02
  -.3212425E-02  -.3652188E-02  -.3850492E-02  -.3582147E-02  -.2948833E-02
  -.2383941E-02  -.2195644E-02  -.2252379E-02  -.2280343E-02  -.2331369E-02
  -.2536852E-02  -.2911140E-02  -.3244440E-02  -.3166793E-02  -.2626339E-02
  -.1876552E-02  -.1072368E-02  -.3083617E-03   .2976514E-03   .9325310E-03
   .1934673E-02   .3176209E-02   .4067047E-02   .3868671E-02   .2256577E-02
  -.3665135E-03  -.3112283E-02  -.5039053E-02  -.5745371E-02  -.5529439E-02
  -.5003000E-02  -.4643508E-02  -.4651269E-02  -.4788693E-02  -.4743923E-02
  -.4610946E-02  -.4787770E-02  -.5500606E-02  -.6503062E-02  -.7127539E-02
  -.6867591E-02  -.5780205E-02  -.4286741E-02  -.2900451E-02  -.2114604E-02
  -.2073693E-02  -.2509724E-02  -.2841490E-02  -.2501952E-02  -.1452914E-02
  -.9080117E-04   .9636227E-03   .1088650E-02   .1208882E-03  -.1556500E-02
  -.3237567E-02  -.4232073E-02  -.4266566E-02  -.3627171E-02  -.2944334E-02
  -.2772875E-02  -.3211515E-02  -.3785514E-02  -.3853970E-02  -.3361840E-02
  -.2801018E-02  -.2532398E-02  -.2725544E-02  -.3256255E-02  -.3881591E-02
  -.4443615E-02  -.4825772E-02  -.5125496E-02  -.5550392E-02  -.5929026E-02
  -.5961680E-02  -.5640059E-02  -.5162200E-02  -.4782525E-02  -.4489373E-02
  -.4305554E-02  -.4305969E-02  -.4361328E-02  -.4449277E-02  -.4750727E-02
  -.5412217E-02  -.6297735E-02  -.6971078E-02  -.7143403E-02  -.6812128E-02
  -.6306770E-02  -.6159745E-02  -.6516208E-02  -.7205902E-02  -.7848253E-02
  -.7997476E-02  -.7614411E-02  -.7100723E-02  -.7036996E-02  -.7774882E-02
  -.9121954E-02  -.1044497E-01  -.1109291E-01  -.1095335E-01  -.1037117E-01
  -.9673213E-02  -.9102190E-02  -.8844909E-02  -.8690269E-02  -.8033537E-02
  -.6453245E-02  -.4270988E-02  -.2277097E-02  -.1110360E-02  -.8945112E-03
  -.1278244E-02  -.1784867E-02  -.2098921E-02  -.2222067E-02  -.2378203E-02
  -.2798349E-02  -.3426278E-02  -.3845566E-02  -.3868376E-02  -.3783383E-02
  -.4127928E-02  -.5279140E-02  -.7101741E-02  -.9161235E-02  -.1114658E-01
  -.1298557E-01  -.1451613E-01  -.1566325E-01  -.1661220E-01  -.1752783E-01
  -.1846852E-01  -.1934945E-01  -.1988354E-01  -.1995486E-01  -.1974198E-01
  -.1944669E-01  -.1924857E-01  -.1924160E-01  -.1948863E-01  -.2020573E-01
  -.2123399E-01  -.2202539E-01  -.2233659E-01  -.2225287E-01  -.2199128E-01
  -.2162291E-01  -.2110901E-01  -.2044408E-01  -.1964687E-01  -.1878987E-01
  -.1786529E-01  -.1674232E-01  -.1546158E-01  -.1421928E-01  -.1318398E-01
  -.1238550E-01  -.1177429E-01  -.1133553E-01  -.1102329E-01  -.1064943E-01
  -.1015777E-01  -.9588923E-02  -.8808679E-02  -.7735352E-02  -.6486009E-02
  -.5219526E-02  -.3949936E-02  -.2857450E-02  -.2384215E-02  -.2585793E-02
  -.2976216E-02  -.3182819E-02  -.3135186E-02  -.2928004E-02  -.2661543E-02
  -.2469793E-02  -.2544789E-02  -.2709297E-02  -.2722066E-02  -.2663288E-02
  -.2694295E-02  -.2845469E-02  -.2913543E-02  -.2909453E-02  -.2934966E-02
  -.2937736E-02  -.2756798E-02  -.2389772E-02  -.2127760E-02  -.1956258E-02
  -.1557359E-02  -.7425959E-03   .2413781E-03   .8204532E-03   .5097691E-03
  -.7884762E-03  -.2665627E-02  -.4381237E-02  -.5443168E-02  -.5990356E-02
  -.6456021E-02  -.6950065E-02  -.7344959E-02  -.7465882E-02  -.7271268E-02
  -.6757420E-02  -.5900479E-02  -.4891688E-02  -.4130026E-02  -.3965822E-02
  -.4511771E-02  -.5733103E-02  -.7449502E-02  -.9169770E-02  -.1039902E-01
  -.1099081E-01  -.1117764E-01  -.1124702E-01  -.1129601E-01  -.1109129E-01
  -.1024756E-01  -.8691017E-02  -.6776883E-02  -.4997570E-02  -.3650499E-02
  -.2788070E-02  -.2412223E-02  -.2363639E-02  -.2342445E-02  -.2011865E-02
  -.1480601E-02  -.9448048E-03  -.5223184E-03  -.2105218E-03   .1887213E-03
   .7933914E-03   .1493525E-02   .1950489E-02   .1761824E-02   .8079510E-03
  -.6558203E-03  -.2087689E-02  -.2801137E-02  -.2675319E-02  -.2187712E-02
  -.1840569E-02  -.1768712E-02  -.1910055E-02  -.2183519E-02  -.2300360E-02
  -.1998711E-02  -.1303522E-02  -.6852586E-03  -.7370911E-03  -.1610822E-02
  -.3037418E-02  -.4595053E-02  -.5760924E-02  -.5899886E-02  -.4919121E-02
  -.3553249E-02  -.2513557E-02  -.1974377E-02  -.1379797E-02  -.6084689E-04
   .2109939E-02   .4802155E-02   .7369112E-02   .9016978E-02   .9520443E-02
   .9420392E-02   .9405559E-02   .9760623E-02   .1039187E-01   .1106456E-01
   .1160523E-01   .1204927E-01   .1233348E-01   .1223570E-01   .1170404E-01
   .1093049E-01   .9983831E-02   .8863816E-02   .7619084E-02   .6244015E-02
   .4764781E-02   .3371556E-02   .2371104E-02   .1922983E-02   .2079927E-02
   .2578624E-02   .2872103E-02   .2666238E-02   .2019319E-02   .1328448E-02
   .1100273E-02   .1394996E-02   .1756353E-02   .1839699E-02   .1760631E-02
   .1755485E-02   .2038335E-02   .2924700E-02   .4471709E-02   .6134346E-02
   .7208022E-02   .7391664E-02   .6886595E-02   .6133781E-02   .5634634E-02
   .5637229E-02   .5811283E-02   .5819616E-02   .5612713E-02   .5474699E-02
   .5740401E-02   .6177602E-02   .6381227E-02   .6269366E-02   .6036135E-02
   .5644794E-02   .4710028E-02   .3123481E-02   .1129376E-02  -.7659441E-03
  -.2140865E-02  -.3028980E-02  -.3697988E-02  -.4451922E-02  -.5283520E-02
  -.5860980E-02  -.5799713E-02  -.4790605E-02  -.2853212E-02  -.5865244E-03
   .1218698E-02   .2241500E-02   .2786721E-02   .3260854E-02   .3778297E-02
   .4305752E-02   .4824455E-02   .5291925E-02   .5704514E-02   .6162987E-02
   .6631108E-02   .6888405E-02   .6591991E-02   .5813547E-02   .5245825E-02
   .5662100E-02   .7053701E-02   .8738649E-02   .1017464E-01   .1116004E-01
   .1165270E-01   .1192576E-01   .1246671E-01   .1339274E-01   .1446812E-01
   .1547620E-01   .1624644E-01   .1652282E-01   .1610963E-01   .1519526E-01
   .1408374E-01   .1292281E-01   .1193479E-01   .1128440E-01   .1109098E-01
   .1139610E-01   .1180340E-01   .1182558E-01   .1145407E-01   .1100194E-01
   .1060130E-01   .1023839E-01   .9965752E-02   .9821578E-02   .9896801E-02
   .1017795E-01   .1054942E-01   .1098490E-01   .1163468E-01   .1243058E-01
   .1313259E-01   .1382279E-01   .1475261E-01   .1600412E-01   .1733724E-01
   .1837945E-01   .1893502E-01   .1889180E-01   .1825617E-01   .1736430E-01
   .1671767E-01   .1667227E-01   .1709919E-01   .1774562E-01   .1845114E-01
   .1892893E-01   .1903535E-01   .1893348E-01   .1885260E-01   .1877723E-01
   .1867228E-01   .1855228E-01   .1829497E-01   .1780195E-01   .1724592E-01
   .1690318E-01   .1682443E-01   .1705784E-01   .1728296E-01   .1712416E-01
   .1676340E-01   .1640485E-01   .1589421E-01   .1515851E-01   .1425508E-01
   .1336287E-01   .1260925E-01   .1200016E-01   .1153010E-01   .1114492E-01
   .1078981E-01   .1052492E-01   .1020555E-01   .9636638E-02   .8973534E-02
   .8283410E-02   .7521749E-02   .6926721E-02   .6582030E-02   .6156900E-02
   .5298251E-02   .3982738E-02   .2594963E-02   .1461324E-02   .6065559E-03
  -.1515586E-03  -.9675057E-03  -.1937627E-02  -.3053064E-02  -.3991555E-02
  -.4432299E-02  -.4527256E-02  -.4706596E-02  -.5048889E-02  -.5165297E-02
  -.4893726E-02  -.4548802E-02  -.4366778E-02  -.4150867E-02  -.3789139E-02
  -.3440454E-02  -.3086008E-02  -.2263935E-02  -.5872553E-03   .1630974E-02
   .3799227E-02   .5409282E-02   .6342169E-02   .6680087E-02   .6312691E-02
   .5144818E-02   .3593635E-02   .2318175E-02   .1479344E-02   .1069658E-02
   .1066627E-02   .1142944E-02   .8324137E-03   .5171949E-05  -.1076393E-02
  -.2101023E-02  -.2997867E-02  -.3968991E-02  -.5178088E-02  -.6539891E-02
  -.7803536E-02  -.8582160E-02  -.8713272E-02  -.8386441E-02  -.7747830E-02
  -.6961243E-02  -.6254498E-02  -.5822687E-02  -.5682535E-02  -.5567970E-02
  -.5116818E-02  -.4328784E-02  -.3595495E-02  -.3194043E-02  -.3300615E-02
  -.3779894E-02  -.3978039E-02  -.3452503E-02  -.2472103E-02  -.1689366E-02
  -.1726074E-02  -.2736388E-02  -.4441903E-02  -.6315477E-02  -.7777919E-02
  -.8596987E-02  -.8959247E-02  -.9324179E-02  -.9974893E-02  -.1060179E-01
  -.1086804E-01  -.1070895E-01  -.1029315E-01  -.9694505E-02  -.8928631E-02
  -.8008871E-02  -.7060771E-02  -.6150242E-02  -.5207578E-02  -.4321980E-02
  -.3603098E-02  -.3099586E-02  -.3016058E-02  -.3301881E-02  -.3560266E-02
  -.3386004E-02  -.2683009E-02  -.1954321E-02  -.1739934E-02  -.2061403E-02
  -.2579317E-02  -.3004919E-02  -.3192168E-02  -.3203242E-02  -.3135368E-02
  -.3227230E-02  -.3645773E-02  -.4187545E-02  -.4642956E-02  -.5008452E-02
  -.5623239E-02  -.6785289E-02  -.8158963E-02  -.9416394E-02  -.1067394E-01
  -.1213220E-01  -.1378870E-01  -.1550431E-01  -.1698457E-01  -.1806229E-01
  -.1883434E-01  -.1956012E-01  -.2030614E-01  -.2082189E-01  -.2090185E-01
  -.2067072E-01  -.2035704E-01  -.2004051E-01  -.1953987E-01  -.1878238E-01
  -.1788762E-01  -.1678608E-01  -.1529632E-01  -.1354508E-01  -.1179906E-01
  -.1019405E-01  -.8754292E-02  -.7893195E-02  -.8133041E-02  -.9308976E-02
  -.1058086E-01  -.1150859E-01  -.1217643E-01  -.1251942E-01  -.1224590E-01
  -.1115682E-01  -.9441859E-02  -.7464094E-02  -.5469550E-02  -.3279765E-02
  -.7634504E-03   .1908755E-02   .4412588E-02   .6339087E-02   .7182001E-02
   .6714427E-02   .5443872E-02   .4027690E-02   .2563245E-02   .9498903E-03
  -.8610222E-03  -.2972898E-02  -.5456608E-02  -.8254347E-02  -.1096961E-01
  -.1294353E-01  -.1370102E-01  -.1333075E-01  -.1246653E-01  -.1177940E-01
  -.1149421E-01  -.1126309E-01  -.1057240E-01  -.9218480E-02  -.7471541E-02
  -.5867203E-02  -.4883968E-02  -.4625839E-02  -.4706606E-02  -.4549352E-02
  -.3735153E-02  -.2267890E-02  -.5537903E-03   .1018443E-02   .2213391E-02
   .2762550E-02   .2564868E-02   .1519424E-02  -.5222761E-03  -.3369813E-02
  -.6412547E-02  -.8981519E-02  -.1059167E-01  -.1114345E-01  -.1087842E-01
  -.9872613E-02  -.8088870E-02  -.5696069E-02  -.2922093E-02  -.2628575E-03
   .1688184E-02   .2544490E-02   .2180252E-02   .9946652E-03  -.4570277E-03
  -.1912741E-02  -.3345958E-02  -.4691525E-02  -.5674538E-02  -.6153962E-02
  -.6395329E-02  -.6562612E-02  -.6537317E-02  -.6204445E-02  -.5510007E-02
  -.4368969E-02  -.2752033E-02  -.9867607E-03   .3748272E-03   .1174990E-02
   .1684855E-02   .2177720E-02   .2650482E-02   .2874446E-02   .2717888E-02
   .2399166E-02   .2182616E-02   .2053530E-02   .1888557E-02   .1558738E-02
   .1022389E-02   .3463298E-03  -.2844227E-03  -.6544551E-03  -.9396807E-03
  -.1488280E-02  -.2263439E-02  -.2934743E-02  -.3350432E-02  -.3519710E-02
  -.3564794E-02  -.3697863E-02  -.4031925E-02  -.4443001E-02  -.4808426E-02
  -.5186696E-02  -.5643345E-02  -.6059338E-02  -.6358918E-02  -.6617030E-02
  -.6786952E-02  -.6733735E-02  -.6539764E-02  -.6393437E-02  -.6303547E-02
  -.6157244E-02  -.5959123E-02  -.5699504E-02  -.5116510E-02  -.3886998E-02
  -.1992369E-02   .2737657E-03   .2446996E-02   .4230378E-02   .5546356E-02
   .6374521E-02   .6707556E-02   .6581634E-02   .6081437E-02   .5186954E-02
   .3975834E-02   .2585408E-02   .1242065E-02   .2867520E-03   .3428850E-04
   .2967446E-03   .6446008E-03   .7923780E-03   .6715483E-03   .7687693E-03
   .1777899E-02   .3706103E-02   .5773167E-02   .7038567E-02   .6991792E-02
   .5811301E-02   .4167409E-02   .2769990E-02   .1894728E-02   .1279980E-02
   .5901474E-03  -.4043883E-03  -.1527631E-02  -.2425476E-02  -.3100661E-02
  -.3749475E-02  -.4537448E-02  -.5451211E-02  -.6437210E-02  -.7365856E-02
  -.8065753E-02  -.8334860E-02  -.7955741E-02  -.7084770E-02  -.6336967E-02
  -.6129398E-02  -.6239081E-02  -.6145592E-02  -.5568455E-02  -.4491444E-02
  -.3022747E-02  -.1368099E-02  -.1098086E-04   .4688683E-03   .1595260E-03
  -.3536392E-03  -.7085281E-03  -.7963743E-03  -.7177527E-03  -.7079431E-03
  -.9744052E-03  -.1481855E-02  -.2121455E-02  -.2854183E-02  -.3553677E-02
  -.4030938E-02  -.3995051E-02  -.3450996E-02  -.2762280E-02  -.2458283E-02
  -.2710027E-02  -.3029837E-02  -.2727570E-02  -.1858127E-02  -.1152180E-02
  -.9846522E-03  -.1215203E-02  -.1589894E-02  -.1947389E-02  -.2295333E-02
  -.2776050E-02  -.3445696E-02  -.4264543E-02  -.4943554E-02  -.5058224E-02
  -.4313634E-02  -.2856640E-02  -.1120138E-02   .3694043E-03   .1294993E-02
   .1755171E-02   .1939948E-02   .1991993E-02   .1895099E-02   .1604583E-02
   .1286572E-02   .1108798E-02   .1012842E-02   .8412524E-03   .5236593E-03
   .1676187E-03  -.1837800E-03  -.6925174E-03  -.1491865E-02  -.2554385E-02
  -.3650653E-02  -.4536015E-02  -.5088422E-02  -.5377596E-02  -.5488205E-02
  -.5446235E-02  -.5442992E-02  -.5727634E-02  -.6127388E-02  -.6395593E-02
  -.6333888E-02  -.5817321E-02  -.4966995E-02  -.3888281E-02  -.2650819E-02
  -.1443241E-02  -.3776761E-03   .4010612E-03   .7545086E-03   .9006320E-03
   .1043142E-02   .1319776E-02   .1729102E-02   .2301652E-02   .3011944E-02
   .3723559E-02   .4356398E-02   .4880146E-02   .5128538E-02   .4819099E-02
   .3945086E-02   .2722047E-02   .1373233E-02  -.7456600E-04  -.1548677E-02
  -.2938354E-02  -.4229657E-02  -.5497827E-02  -.6745247E-02  -.7795836E-02
  -.8337633E-02  -.8230852E-02  -.7801673E-02  -.7587070E-02  -.7903314E-02
  -.8820074E-02  -.1016256E-01  -.1144570E-01  -.1223298E-01  -.1255905E-01
  -.1254528E-01  -.1210854E-01  -.1127372E-01  -.1024609E-01  -.9188333E-02
  -.8199594E-02  -.7362104E-02  -.6711312E-02  -.6160395E-02  -.5516644E-02
  -.4436327E-02  -.2702916E-02  -.5176440E-03   .1767121E-02   .3903643E-02
   .5850272E-02   .7711564E-02   .9579255E-02   .1164869E-01   .1363982E-01
   .1504946E-01   .1581152E-01   .1630759E-01   .1692930E-01   .1773603E-01
   .1857746E-01   .1911208E-01   .1900905E-01   .1845452E-01   .1779113E-01
   .1697897E-01   .1588323E-01   .1480115E-01   .1419846E-01   .1429460E-01
   .1497748E-01   .1570229E-01   .1599342E-01   .1580139E-01   .1513014E-01
   .1409975E-01   .1295209E-01   .1172101E-01   .1030601E-01   .8750515E-02
   .7207756E-02   .5622216E-02   .3803803E-02   .1907316E-02   .5311496E-03
   .9774794E-04   .5792635E-03   .1642339E-02   .2795718E-02   .3558381E-02
   .3719406E-02   .3438691E-02   .3118022E-02   .3106194E-02   .3444493E-02
   .3882911E-02   .4182306E-02   .4229304E-02   .4186304E-02   .4266873E-02
   .4528235E-02   .4842725E-02   .4970563E-02   .4833339E-02   .4542498E-02
   .4243049E-02   .4146824E-02   .4521271E-02   .5455630E-02   .6716611E-02
   .7928689E-02   .8821249E-02   .9470858E-02   .1008765E-01   .1052812E-01
   .1063217E-01   .1044368E-01   .1018870E-01   .1010087E-01   .1014493E-01
   .1019922E-01   .1024701E-01   .1029473E-01   .1038306E-01   .1033856E-01
   .9966828E-02   .9179527E-02   .8148899E-02   .7368350E-02   .6990464E-02
   .6847643E-02   .6885635E-02   .7035492E-02   .7060860E-02   .6826448E-02
   .6852698E-02   .7688652E-02   .8973030E-02   .9935565E-02   .1028390E-01
   .1028019E-01   .1035595E-01   .1079388E-01   .1156843E-01   .1229076E-01
   .1254027E-01   .1229262E-01   .1184220E-01   .1147265E-01   .1121567E-01
   .1083178E-01   .9934003E-02   .8492371E-02   .6985562E-02   .5712060E-02
   .4837543E-02   .4477100E-02   .4446602E-02   .4420379E-02   .4291083E-02
   .4316302E-02   .4501211E-02   .4582630E-02   .4259442E-02   .3538781E-02
   .2860299E-02   .2343793E-02   .1867728E-02   .1397935E-02   .8707260E-03
   .3771219E-03   .1956921E-03   .4470065E-03   .8965226E-03   .1191581E-02
   .1367444E-02   .1549224E-02   .1640023E-02   .1593027E-02   .1423645E-02
   .1033430E-02   .3930064E-03  -.2286169E-03  -.6283292E-03  -.8239936E-03
  -.8583559E-03  -.8991448E-03  -.1195875E-02  -.1839144E-02  -.2632851E-02
  -.3129910E-02  -.3091829E-02  -.2748209E-02  -.2519441E-02  -.2700729E-02
  -.3288268E-02  -.3986241E-02  -.4545627E-02  -.4744617E-02  -.4487310E-02
  -.4035986E-02  -.3559686E-02  -.3019027E-02  -.2366975E-02  -.1893522E-02
  -.1912777E-02  -.2223767E-02  -.2431602E-02  -.2426540E-02  -.2455357E-02
  -.2844795E-02  -.3471633E-02  -.3915020E-02  -.3957442E-02  -.3958892E-02
  -.4381647E-02  -.5119884E-02  -.6008578E-02  -.7341148E-02  -.9042684E-02
  -.1028927E-01  -.1004627E-01  -.8091285E-02  -.5019674E-02  -.1759200E-02
   .5623583E-03   .7187544E-03  -.1641919E-02  -.5048479E-02  -.6932563E-02
  -.5983482E-02  -.3290007E-02  -.1108492E-02  -.7936109E-03  -.2062651E-02
  -.3664583E-02  -.4298062E-02  -.3327972E-02  -.1397409E-02  -.2851502E-03
  -.1667895E-02  -.5383588E-02  -.9059507E-02  -.9988599E-02  -.7862558E-02
  -.5165521E-02  -.4826607E-02  -.7608318E-02  -.1157397E-01  -.1394474E-01
  -.1327361E-01  -.1023102E-01  -.7005738E-02  -.5623249E-02  -.6920966E-02
  -.1010671E-01  -.1295313E-01  -.1364795E-01  -.1225106E-01  -.1036484E-01
  -.9678082E-02  -.1070506E-01  -.1259486E-01  -.1400237E-01  -.1403593E-01
  -.1305234E-01  -.1213084E-01  -.1204954E-01  -.1282881E-01  -.1395792E-01
  -.1497497E-01  -.1568847E-01  -.1627419E-01  -.1689221E-01  -.1735391E-01
  -.1738670E-01  -.1690404E-01  -.1616175E-01  -.1543483E-01  -.1482681E-01
  -.1428348E-01  -.1364794E-01  -.1279388E-01  -.1184914E-01  -.1105500E-01
  -.1070826E-01  -.1093587E-01  -.1146910E-01  -.1174956E-01  -.1145309E-01
  -.1089318E-01  -.1048600E-01  -.1030252E-01  -.1012770E-01  -.9644043E-02
  -.8643777E-02  -.7269553E-02  -.6018280E-02  -.5352534E-02  -.5466526E-02
  -.6029599E-02  -.6447830E-02  -.6528248E-02  -.6477446E-02  -.6743013E-02
  -.7382333E-02  -.7779081E-02  -.7366416E-02  -.6171543E-02  -.4711608E-02
  -.3685039E-02  -.3668613E-02  -.4655659E-02  -.6153571E-02  -.7533590E-02
  -.8259641E-02  -.8226095E-02  -.7825767E-02  -.7670206E-02  -.8034487E-02
  -.8568097E-02  -.8676204E-02  -.7987907E-02  -.6733532E-02  -.5478256E-02
  -.4817598E-02  -.5070073E-02  -.5976692E-02  -.7069997E-02  -.7958353E-02
  -.8550923E-02  -.9106759E-02  -.9825374E-02  -.1073752E-01  -.1165303E-01
  -.1217749E-01  -.1185363E-01  -.1054509E-01  -.8815103E-02  -.7501293E-02
  -.7086466E-02  -.7514766E-02  -.8356730E-02  -.8913511E-02  -.8580966E-02
  -.7362950E-02  -.6007332E-02  -.5302598E-02  -.5492054E-02  -.6278249E-02
  -.7078520E-02  -.7393009E-02  -.7086888E-02  -.6467870E-02  -.6145438E-02
  -.6433620E-02  -.7301065E-02  -.8527841E-02  -.9831824E-02  -.1093770E-01
  -.1166516E-01  -.1207780E-01  -.1232066E-01  -.1253758E-01  -.1275253E-01
  -.1287510E-01  -.1270510E-01  -.1213141E-01  -.1126939E-01  -.1032356E-01
  -.9403800E-02  -.8535470E-02  -.7820818E-02  -.7254317E-02  -.6606235E-02
  -.5839887E-02  -.5003713E-02  -.4195742E-02  -.3583577E-02  -.3218942E-02
  -.2961822E-02  -.2471213E-02  -.1686019E-02  -.8501914E-03  -.1934040E-03
   .1418569E-03  -.4262804E-05  -.5052598E-03  -.9418835E-03  -.1104746E-02
  -.1102809E-02  -.1171781E-02  -.1458298E-02  -.1763477E-02  -.1643519E-02
  -.8791939E-03   .5146643E-03   .2130086E-02   .3435739E-02   .4216605E-02
   .4622072E-02   .4863333E-02   .5006258E-02   .5127609E-02   .5142015E-02
   .4838289E-02   .4106805E-02   .3177005E-02   .2686998E-02   .2795665E-02
   .3164104E-02   .3574303E-02   .4010340E-02   .4465834E-02   .4868150E-02
   .5125441E-02   .5514394E-02   .6143864E-02   .6756135E-02   .7302471E-02
   .7596460E-02   .7452771E-02   .6933708E-02   .6315750E-02   .5938513E-02
   .6036074E-02   .6369340E-02   .6444249E-02   .5974166E-02   .5129340E-02
   .4547950E-02   .4543434E-02   .4841565E-02   .5098447E-02   .5223879E-02
   .5347943E-02   .5528585E-02   .5673232E-02   .5725904E-02   .5600830E-02
   .5308754E-02   .4914484E-02   .4617758E-02   .4598238E-02   .4893483E-02
   .5368094E-02   .5781235E-02   .5884391E-02   .5615865E-02   .5081347E-02
   .4339722E-02   .3700854E-02   .3226139E-02   .3000938E-02   .2910776E-02
   .2774396E-02   .2596523E-02   .2276342E-02   .1826612E-02   .1506319E-02
   .1551824E-02   .1891119E-02   .2394207E-02   .2994613E-02   .3544525E-02
   .3731099E-02   .3387236E-02   .2601972E-02   .1569260E-02   .4838892E-03
  -.4429506E-03  -.1072567E-02  -.1512972E-02  -.2074081E-02  -.3017261E-02
  -.3941706E-02  -.4157679E-02  -.3576971E-02  -.2713501E-02  -.2229278E-02
  -.2344680E-02  -.2633513E-02  -.2627307E-02  -.2466149E-02  -.2456019E-02
  -.2657974E-02  -.2973127E-02  -.3213519E-02  -.3419026E-02  -.3638877E-02
  -.3511141E-02  -.2752588E-02  -.1692615E-02  -.8610320E-03  -.5072928E-03
  -.2951096E-03   .3081035E-03   .1320195E-02   .2362253E-02   .3221428E-02
   .3996431E-02   .4644205E-02   .4972934E-02   .5042804E-02   .5150675E-02
   .5388320E-02   .5558225E-02   .5414117E-02   .5020567E-02   .4594037E-02
   .4145229E-02   .3668805E-02   .3244500E-02   .2910186E-02   .2503770E-02
   .1876453E-02   .1199657E-02   .8743916E-03   .9974680E-03   .1368407E-02
   .1749783E-02   .2190121E-02   .2765577E-02   .3352953E-02   .3781076E-02
   .4014728E-02   .4099417E-02   .3864382E-02   .3318178E-02   .2803462E-02
   .2491132E-02   .2032073E-02   .1165728E-02   .2768718E-03  -.2573816E-03
  -.4874053E-03  -.4012294E-03  -.1680898E-05   .5942131E-03   .1234716E-02
   .1855306E-02   .2481573E-02   .3147102E-02   .3927953E-02   .4654372E-02
   .5015507E-02   .5124644E-02   .5394274E-02   .6008596E-02   .6741772E-02
   .7296807E-02   .7465519E-02   .7220858E-02   .6724194E-02   .6251748E-02
   .6046207E-02   .6190863E-02   .6588790E-02   .7017376E-02   .7371410E-02
   .7669633E-02   .7930744E-02   .8036124E-02   .7910740E-02   .7667590E-02
   .7400216E-02   .7044842E-02   .6636790E-02   .6429341E-02   .6716900E-02
   .7389920E-02   .7923962E-02   .7912884E-02   .7430030E-02   .6620638E-02
   .5516073E-02   .4344491E-02   .3434655E-02   .2963594E-02   .2941470E-02
   .3300585E-02   .3895417E-02   .4527656E-02   .4969551E-02   .5053120E-02
   .4752363E-02   .4161117E-02   .3481866E-02   .2925161E-02   .2617714E-02
   .2735438E-02   .3337423E-02   .4201668E-02   .4888266E-02   .4952299E-02
   .4243495E-02   .3189151E-02   .2413916E-02   .1979664E-02   .1585163E-02
   .1074629E-02   .3266231E-03  -.6009208E-03  -.1382674E-02  -.1874572E-02
  -.2063128E-02  -.2077375E-02  -.2172028E-02  -.2411850E-02  -.2843087E-02
  -.3420066E-02  -.3675611E-02  -.3244160E-02  -.2343042E-02  -.1536584E-02
  -.9670763E-03  -.5115284E-03  -.2340133E-03  -.3253749E-03  -.8149577E-03
  -.1431298E-02  -.1752509E-02  -.1698595E-02  -.1524838E-02  -.1356334E-02
  -.1119189E-02  -.6995518E-03  -.1402910E-04   .9133128E-03   .1941464E-02
   .2875572E-02   .3565383E-02   .4089649E-02   .4579372E-02   .5026984E-02
   .5523469E-02   .6306565E-02   .7301701E-02   .8248463E-02   .9060253E-02
   .9861991E-02   .1079126E-01   .1182203E-01   .1275147E-01   .1336033E-01
   .1361541E-01   .1370723E-01   .1370493E-01   .1349630E-01   .1279443E-01
   .1150297E-01   .9912511E-02   .8425706E-02   .7274451E-02   .6464444E-02
   .6132907E-02   .6403182E-02   .7007933E-02   .7501126E-02   .7886030E-02
   .8470570E-02   .9223811E-02   .9703531E-02   .9666777E-02   .9401889E-02
   .9157810E-02   .8858498E-02   .8365132E-02   .7658097E-02   .6758139E-02
   .5793669E-02   .5077130E-02   .4783805E-02   .4910163E-02   .5331407E-02
   .5968330E-02   .6759802E-02   .7505336E-02   .7901189E-02   .7763272E-02
   .7317970E-02   .6961237E-02   .6829312E-02   .6771696E-02   .6601940E-02
   .6223744E-02   .5780749E-02   .5574470E-02   .5658330E-02   .5699007E-02
   .5432922E-02   .4956740E-02   .4352714E-02   .3768503E-02   .3400531E-02
   .3152680E-02   .2694256E-02   .1863662E-02   .8230142E-03  -.1781412E-03
  -.9831209E-03  -.1624278E-02  -.2164212E-02  -.2478648E-02  -.2516620E-02
  -.2290776E-02  -.1975133E-02  -.1970478E-02  -.2586771E-02  -.3754771E-02
  -.5070983E-02  -.6197852E-02  -.6878366E-02  -.7002286E-02  -.6850337E-02
  -.6874143E-02  -.7173649E-02  -.7573104E-02  -.7847563E-02  -.7809275E-02
  -.7317946E-02  -.6430693E-02  -.5538372E-02  -.5109866E-02  -.5296824E-02
  -.5834673E-02  -.6237937E-02  -.6084069E-02  -.5307795E-02  -.4222429E-02
  -.3235488E-02  -.2619508E-02  -.2451618E-02  -.2509295E-02  -.2489019E-02
  -.2358758E-02  -.2286699E-02  -.2540229E-02  -.3028374E-02  -.3085244E-02
  -.2253083E-02  -.7326530E-03   .8787045E-03   .2051436E-02   .2419392E-02
   .1833472E-02   .7040115E-03  -.1290975E-03   .1074984E-03   .1452593E-02
   .3120052E-02   .3979372E-02   .3478025E-02   .2063425E-02   .5912363E-03
  -.3908174E-03  -.8197486E-03  -.9542875E-03  -.1108435E-02  -.1246542E-02
  -.1165977E-02  -.1026837E-02  -.1167599E-02  -.1735790E-02  -.2763839E-02
  -.4262257E-02  -.6062997E-02  -.7617182E-02  -.8319720E-02  -.8004650E-02
  -.6945930E-02  -.5722541E-02  -.4780949E-02  -.4202022E-02  -.3927560E-02
  -.3785201E-02  -.3361516E-02  -.2635769E-02  -.2101172E-02  -.1793395E-02
  -.1286878E-02  -.4788119E-03   .3894976E-03   .1205974E-02   .1934687E-02
   .2313094E-02   .2264844E-02   .2116876E-02   .2100235E-02   .2146453E-02
   .2062036E-02   .1762634E-02   .1437645E-02   .1462178E-02   .1946624E-02
   .2600611E-02   .3039277E-02   .2982037E-02   .2398716E-02   .1731288E-02
   .1581336E-02   .1899592E-02   .2283572E-02   .2584117E-02   .2854444E-02
   .3118201E-02   .3442401E-02   .3880985E-02   .4384171E-02   .4861378E-02
   .5177911E-02   .5332646E-02   .5516328E-02   .5903421E-02   .6517174E-02
   .7141912E-02   .7443170E-02   .7195925E-02   .6391479E-02   .5365190E-02
   .4553430E-02   .4231303E-02   .4455384E-02   .4985322E-02   .5534580E-02
   .5919424E-02   .6113842E-02   .6200334E-02   .6254638E-02   .6339579E-02
   .6312572E-02   .5875804E-02   .4871133E-02   .3313806E-02   .1395410E-02
  -.4371581E-03  -.1684430E-02  -.2268177E-02  -.2507716E-02  -.2676248E-02
  -.2829770E-02  -.2856276E-02  -.2758411E-02  -.2567012E-02  -.2174859E-02
  -.1634197E-02  -.9900978E-03  -.2470546E-03   .3634119E-03   .6957465E-03
   .1023371E-02   .1695347E-02   .2627501E-02   .3470150E-02   .3860583E-02
   .3706718E-02   .3155189E-02   .2472495E-02   .1843480E-02   .1453788E-02
   .1487099E-02   .1812807E-02   .2194818E-02   .2609085E-02   .3227710E-02
   .4209304E-02   .5363455E-02   .5976873E-02   .5459789E-02   .3852063E-02
   .1770193E-02  -.1298906E-03  -.1376309E-02  -.1692767E-02  -.1293756E-02
  -.6461295E-03  -.1349313E-04   .6367945E-03   .1472399E-02   .2458159E-02
   .3301039E-02   .3716533E-02   .3778027E-02   .3788076E-02   .3859530E-02
   .3715976E-02   .3021476E-02   .1914271E-02   .8284332E-03   .8753097E-04
  -.1906193E-03  -.1294747E-03   .7934770E-04   .1142344E-03  -.1549789E-03
  -.3806124E-03  -.3700041E-03  -.2979007E-03  -.4218074E-03  -.7898356E-03
  -.1001584E-02  -.5102669E-03   .7334285E-03   .2042882E-02   .2500361E-02
   .1796084E-02   .2971460E-03  -.1288152E-02  -.2336350E-02  -.2532781E-02
  -.1988256E-02  -.1083558E-02  -.1113962E-03   .5869918E-03   .8667281E-03
   .8339157E-03   .6507260E-03   .2520126E-03  -.5249572E-03  -.1520249E-02
  -.2423629E-02  -.3114324E-02  -.3600210E-02  -.3676156E-02  -.3273870E-02
  -.2784892E-02  -.2491735E-02  -.2360046E-02  -.2392839E-02  -.2646745E-02
  -.3013887E-02  -.3266188E-02  -.3333144E-02  -.3230860E-02  -.3038043E-02
  -.2899572E-02  -.2974255E-02  -.3181136E-02  -.3294000E-02  -.3240040E-02
  -.3080202E-02  -.3030294E-02  -.3323600E-02  -.3945292E-02  -.4631817E-02
  -.5078092E-02  -.5186946E-02  -.5169038E-02  -.5354047E-02  -.5769647E-02
  -.6093716E-02  -.5941134E-02  -.5312466E-02  -.4623473E-02  -.4230094E-02
  -.4273416E-02  -.4695870E-02  -.5225117E-02  -.5722603E-02  -.6250060E-02
  -.6909066E-02  -.7664405E-02  -.8125416E-02  -.8001630E-02  -.7411642E-02
  -.6555353E-02  -.5493350E-02  -.4300505E-02  -.3079318E-02  -.1871560E-02
  -.6705092E-03   .3899531E-03   .1009552E-02   .1104622E-02   .9873893E-03
   .1119508E-02   .1645815E-02   .2211737E-02   .2420910E-02   .2222254E-02
   .1862156E-02   .1614449E-02   .1553473E-02   .1675018E-02   .1866633E-02
   .1855970E-02   .1548481E-02   .1108077E-02   .6796088E-03   .3357221E-03
   .4111259E-04  -.1897627E-03  -.3316504E-03  -.3443750E-03  -.2149438E-03
   .5026584E-04   .3103624E-03   .3815591E-03   .2402384E-03  -.3807228E-04
  -.2893667E-03  -.4263985E-03  -.5921970E-03  -.9827493E-03  -.1536530E-02
  -.1925125E-02  -.1924687E-02  -.1618389E-02  -.1095890E-02  -.5048845E-03
  -.5225053E-04   .2435445E-03   .5500404E-03   .8786791E-03   .1019226E-02
   .9583276E-03   .8546253E-03   .8825176E-03   .1096902E-02   .1294666E-02
   .1330062E-02   .1271524E-02   .1262024E-02   .1341747E-02   .1404521E-02
   .1292902E-02   .1008238E-02   .6708456E-03   .5444514E-03   .8876586E-03
   .1540822E-02   .2035715E-02   .2068048E-02   .1649868E-02   .1036797E-02
   .6217288E-03   .5862798E-03   .8065629E-03   .1055726E-02   .1202777E-02
   .1285467E-02   .1408886E-02   .1613243E-02   .1915027E-02   .2270963E-02
   .2573158E-02   .2726757E-02   .2737310E-02   .2664079E-02   .2563399E-02
   .2491570E-02   .2392860E-02   .2237368E-02   .2184285E-02   .2244141E-02
   .2352737E-02   .2532184E-02   .2778690E-02   .2937041E-02   .2865487E-02
   .2569632E-02   .2037739E-02   .1289411E-02   .5537684E-03   .6883802E-05
  -.4175515E-03  -.8378186E-03  -.1184566E-02  -.1239204E-02  -.9100160E-03
  -.2446722E-03   .5873891E-03   .1325086E-02   .1729652E-02   .1643161E-02
   .1115993E-02   .4657995E-03   .4699670E-05  -.1934408E-03  -.2338029E-03
  -.2271217E-03  -.1797629E-03   .5244307E-05   .3911846E-03   .8995752E-03
   .1470536E-02   .2116168E-02   .2688347E-02   .2927636E-02   .2802984E-02
   .2537071E-02   .2401591E-02   .2659274E-02   .3184272E-02   .3626041E-02
   .3930480E-02   .4249270E-02   .4582265E-02   .4649514E-02   .4308553E-02
   .3809027E-02   .3357337E-02   .2898927E-02   .2371421E-02   .1903706E-02
   .1694516E-02   .1731235E-02   .1849206E-02   .1913537E-02   .1879693E-02
   .1831909E-02   .1856068E-02   .1969217E-02   .2168264E-02   .2296203E-02
   .2230844E-02   .1865665E-02   .1090613E-02   .1282199E-03  -.5882460E-03
  -.9782014E-03  -.1243162E-02  -.1381536E-02  -.1317327E-02  -.1099665E-02
  -.8430576E-03  -.6250113E-03  -.4703652E-03  -.3521804E-03  -.1814999E-03
   .5444723E-04   .3056048E-03   .5028066E-03   .6223952E-03   .6427635E-03
   .6016715E-03   .5839120E-03   .5072519E-03   .3106292E-03   .1497283E-03
   .8103174E-04  -.7668874E-04  -.4284982E-03  -.8096641E-03  -.1069416E-02
  -.1236814E-02  -.1401259E-02  -.1553051E-02  -.1638637E-02  -.1644362E-02
  -.1600305E-02  -.1540598E-02  -.1396829E-02  -.1037031E-02  -.5747531E-03
  -.1890381E-03   .9203738E-04   .1560329E-03  -.4019602E-04  -.3618729E-03
  -.6497750E-03  -.7958405E-03  -.7178797E-03  -.3767381E-03   .5665596E-04
   .3353076E-03   .3731348E-03   .2464914E-03   .9859829E-04   .1220707E-04
  -.2877163E-04  -.1025180E-06   .1363284E-03   .3493547E-03   .5704855E-03
   .7956824E-03   .9901123E-03   .1000062E-02   .8112544E-03   .6668857E-03
   .7064386E-03   .8536771E-03   .9592699E-03   .1030276E-02   .1080507E-02
   .1041598E-02   .9175241E-03   .8090999E-03   .8626774E-03   .1073829E-02
   .1243549E-02   .1092222E-02   .4989394E-03  -.3105709E-03  -.9589770E-03
  -.1167200E-02  -.8365489E-03  -.2263315E-03   .1790780E-03   .1601584E-03
  -.1233818E-03  -.4465572E-03  -.6008473E-03  -.5533998E-03  -.4206077E-03
  -.4113402E-03  -.7934751E-03  -.1594743E-02  -.2548972E-02  -.3417689E-02
  -.4193280E-02  -.4895643E-02  -.5430257E-02  -.5738622E-02  -.5745544E-02
  -.5290637E-02  -.4335812E-02  -.3133863E-02  -.1955869E-02  -.8754391E-03
   .6346138E-04   .7563550E-03   .1156173E-02   .1359487E-02   .1435924E-02
   .1374665E-02   .1271088E-02   .1245393E-02   .1283325E-02   .1329788E-02
   .1314651E-02   .1180546E-02   .1026175E-02   .8409730E-03   .5361446E-03
   .1804760E-03  -.1055494E-03  -.4107511E-03  -.8570709E-03  -.1347194E-02
  -.1595117E-02  -.1500529E-02  -.1262976E-02  -.1118023E-02  -.1114147E-02
  -.1118952E-02  -.1146295E-02  -.1244454E-02  -.1438015E-02  -.1665758E-02
  -.1798474E-02  -.1799775E-02  -.1764536E-02  -.1732920E-02  -.1730702E-02
  -.1850984E-02  -.2201443E-02  -.2801790E-02  -.3578808E-02  -.4432213E-02
  -.5236632E-02  -.5948519E-02  -.6582415E-02  -.7151045E-02  -.7628832E-02
  -.7956253E-02  -.8055559E-02  -.7888011E-02  -.7519635E-02  -.7112209E-02
  -.6820346E-02  -.6649871E-02  -.6504941E-02  -.6263035E-02  -.5903275E-02
  -.5494623E-02  -.5079726E-02  -.4687043E-02  -.4395787E-02  -.4216725E-02
  -.4078146E-02  -.3920865E-02  -.3753349E-02  -.3661466E-02  -.3570914E-02
  -.3443693E-02  -.3381295E-02  -.3354261E-02  -.3240326E-02  -.3112756E-02
  -.3039877E-02  -.3019488E-02  -.3102240E-02  -.3282061E-02  -.3478951E-02
  -.3617803E-02  -.3539020E-02  -.3071236E-02  -.2340551E-02  -.1715499E-02
  -.1507850E-02  -.1786000E-02  -.2386597E-02  -.3028061E-02  -.3430806E-02
  -.3523917E-02  -.3535154E-02  -.3790804E-02  -.4383703E-02  -.5127840E-02
  -.5825681E-02  -.6341185E-02  -.6587971E-02  -.6535781E-02  -.6341696E-02
  -.6178116E-02  -.6072660E-02  -.5953624E-02  -.5787022E-02  -.5564376E-02
  -.5260700E-02  -.4907924E-02  -.4577295E-02  -.4379503E-02  -.4446234E-02
  -.4722257E-02  -.4938942E-02  -.4924922E-02  -.4720014E-02  -.4421208E-02
  -.4130759E-02  -.3932440E-02  -.3837089E-02  -.3752337E-02  -.3661797E-02
  -.3554088E-02  -.3352175E-02  -.3072903E-02  -.2828805E-02  -.2612644E-02
  -.2310392E-02  -.1920784E-02  -.1514453E-02  -.1105567E-02  -.6861891E-03
  -.3250670E-03  -.1323831E-03  -.1294785E-03  -.2226193E-03  -.3635439E-03
  -.5599541E-03  -.7858187E-03  -.1060321E-02  -.1378440E-02  -.1678852E-02
  -.1865257E-02  -.1775712E-02  -.1373546E-02  -.8590821E-03  -.4779688E-03
  -.2694496E-03  -.1368277E-03  -.2755206E-04   .7037050E-04   .1752549E-03
   .2474659E-03   .1671216E-03  -.6729519E-04  -.2435150E-03  -.1368293E-03
   .2465919E-03   .7382096E-03   .1190229E-02   .1503204E-02   .1652863E-02
   .1694160E-02   .1706324E-02   .1730011E-02   .1744063E-02   .1750203E-02
   .1774211E-02   .1802539E-02   .1814348E-02   .1781661E-02   .1613189E-02
   .1189066E-02   .5257327E-03  -.1729226E-03  -.7375792E-03  -.1078119E-02
  -.1186993E-02  -.1115012E-02  -.9250600E-03  -.6908429E-03  -.4347681E-03
  -.1562603E-03   .1761095E-04  -.1199493E-03  -.5479693E-03  -.1021296E-02
  -.1335717E-02  -.1475922E-02  -.1542052E-02  -.1557982E-02  -.1509360E-02
  -.1400494E-02  -.1229563E-02  -.9972043E-03  -.7220974E-03  -.4666391E-03
  -.3311599E-03  -.4101751E-03  -.7362986E-03  -.1227502E-02  -.1719798E-02
  -.2033108E-02  -.2018062E-02  -.1655482E-02  -.1113967E-02  -.5489415E-03
   .5392862E-04   .7736566E-03   .1586999E-02   .2310719E-02   .2563433E-02
   .2018434E-02   .8217172E-03  -.3385372E-03  -.9024368E-03  -.9171148E-03
  -.7583365E-03  -.7513951E-03  -.1023701E-02  -.1519167E-02  -.1987186E-02
  -.2115826E-02  -.1891172E-02  -.1677898E-02  -.1792358E-02  -.2163755E-02
  -.2439380E-02  -.2310878E-02  -.1818382E-02  -.1277022E-02  -.9508779E-03
  -.8585625E-03  -.8857731E-03  -.9941142E-03  -.1236811E-02  -.1587397E-02
  -.1945801E-02  -.2238453E-02  -.2389992E-02  -.2361834E-02  -.2261485E-02
  -.2190541E-02  -.2085669E-02  -.1825442E-02  -.1394978E-02  -.8538684E-03
  -.2684375E-03   .2137124E-03   .4560552E-03   .5019127E-03   .5138469E-03
   .5325282E-03   .4587499E-03   .2113364E-03  -.1468235E-03  -.4840721E-03
  -.6966916E-03  -.7740204E-03  -.8148974E-03  -.8978681E-03  -.1009478E-02
  -.1065054E-02  -.1025318E-02  -.9731488E-03  -.9378132E-03  -.8798148E-03
  -.7527280E-03  -.5646233E-03  -.3455110E-03  -.1321783E-03  -.2006737E-04
  -.8858243E-04  -.2971837E-03  -.4714403E-03  -.4303149E-03  -.1863770E-03
   .9142047E-04   .2912924E-03   .4042614E-03   .4842135E-03   .5669561E-03
   .6370050E-03   .6945712E-03   .7191039E-03   .6561135E-03   .5945747E-03
   .6711978E-03   .8995362E-03   .1173450E-02   .1373075E-02   .1453008E-02
   .1400479E-02   .1249965E-02   .1082571E-02   .9752796E-03   .9257829E-03
   .8486036E-03   .6906470E-03   .5092294E-03   .4367399E-03   .5523467E-03
   .8067992E-03   .1179380E-02   .1672877E-02   .2181487E-02   .2585780E-02
   .2883697E-02   .3090063E-02   .3201287E-02   .3249654E-02   .3234062E-02
   .3117309E-02   .2911249E-02   .2622312E-02   .2271901E-02   .1899353E-02
   .1561852E-02   .1267364E-02   .1003648E-02   .8044029E-03   .6943283E-03
   .6326131E-03   .6207119E-03   .6701059E-03   .7343303E-03   .7629835E-03
   .7762882E-03   .7972813E-03   .8354304E-03   .9297281E-03   .1103613E-02
   .1361486E-02   .1663686E-02   .1957334E-02   .2252402E-02   .2584061E-02
   .2942002E-02   .3290282E-02   .3583647E-02   .3800174E-02   .3955442E-02
   .4059644E-02   .4115414E-02   .4124747E-02   .4083215E-02   .3955236E-02
   .3753357E-02   .3585098E-02   .3495700E-02   .3427821E-02   .3337873E-02
   .3294670E-02   .3357157E-02   .3445476E-02   .3422324E-02   .3254053E-02
   .3054184E-02   .2944414E-02   .2862405E-02   .2701268E-02   .2550009E-02
   .2485589E-02   .2455042E-02   .2389938E-02   .2299864E-02   .2246194E-02
   .2254584E-02   .2316018E-02   .2427723E-02   .2580935E-02   .2697371E-02
   .2695797E-02   .2575227E-02   .2392011E-02   .2171431E-02   .1886790E-02
   .1563734E-02   .1293842E-02   .1156519E-02   .1173680E-02   .1276056E-02
   .1396097E-02   .1483723E-02   .1467485E-02   .1337568E-02   .1195301E-02
   .1122706E-02   .1060137E-02   .9465249E-03   .8047393E-03   .6550176E-03
   .4988978E-03   .3567864E-03   .2833553E-03   .2930863E-03   .3379481E-03
   .3068884E-03   .1807822E-03   .9280774E-04   .1490831E-03   .2649456E-03
   .2898227E-03   .2086303E-03   .1365608E-03   .1774940E-03   .2873546E-03
   .3182775E-03   .1995005E-03  -.3345227E-04  -.3034334E-03  -.5181246E-03
  -.5696137E-03  -.3803512E-03   .6239125E-05   .4140899E-03   .6788478E-03
   .7626164E-03   .7163406E-03   .6085546E-03   .4917372E-03   .3917074E-03
   .3210437E-03   .2604493E-03   .1899184E-03   .1478917E-03   .1898759E-03
   .3222202E-03   .4909763E-03   .5990728E-03   .5650912E-03   .4061181E-03
   .2133709E-03   .5048306E-04  -.1095406E-03  -.2988297E-03  -.4583740E-03
  -.5067528E-03  -.4207547E-03  -.2562771E-03  -.8903927E-04   .2156879E-04
   .9247655E-04   .2009224E-03   .3265755E-03   .3733371E-03   .3107026E-03
   .2226137E-03   .1620802E-03   .1067630E-03   .5026097E-04   .2234155E-05
  -.4584903E-04  -.9890955E-04  -.1355207E-03  -.1544869E-03  -.1813552E-03
  -.2208852E-03  -.2529831E-03  -.2594639E-03  -.2264213E-03  -.1434753E-03
  -.2295154E-04   .9471655E-04   .1550435E-03   .1207279E-03   .6322379E-05
  -.9817989E-04  -.1271958E-03  -.1107147E-03  -.1067151E-03  -.1450935E-03
  -.2083998E-03  -.2304638E-03  -.1585047E-03  -.6921241E-07   .1883090E-03
   .3337959E-03   .4116675E-03   .4684746E-03   .5470736E-03   .6182588E-03
   .6284029E-03   .5501529E-03   .3884612E-03   .1725425E-03  -.3472940E-04
  -.1861446E-03  -.2863374E-03  -.3647513E-03  -.4242830E-03  -.4698831E-03
  -.5060592E-03  -.5392910E-03  -.5628319E-03  -.5576678E-03  -.5264078E-03
  -.4866371E-03  -.4541302E-03  -.4257364E-03  -.3973158E-03  -.3615892E-03
  -.2780419E-03  -.1570827E-03  -.7189731E-04  -.6456160E-04  -.1295020E-03
  -.2261615E-03  -.3012028E-03  -.3339724E-03  -.3483867E-03  -.3713744E-03
  -.4123115E-03  -.4601345E-03  -.4881753E-03  -.4837617E-03  -.4604391E-03
  -.4263253E-03  -.3653672E-03  -.2572358E-03  -.1122553E-03   .2266986E-04
   .1214634E-03   .1877768E-03   .2273243E-03   .2512610E-03   .2674812E-03
   .2611313E-03   .2217662E-03   .1642217E-03   .1113159E-03   .7378324E-04
   .5710166E-04   .6109759E-04   .7608657E-04   .8832457E-04   .8955163E-04
   .8824144E-04   .8741615E-04   .7164434E-04   .2084131E-04  -.7065522E-04
  -.1870668E-03  -.3108335E-03  -.4333527E-03  -.5441170E-03  -.6228795E-03
  -.6505115E-03  -.6324177E-03  -.5872800E-03  -.5440029E-03  -.5243705E-03
  -.5104163E-03  -.4819700E-03  -.4375939E-03  -.3960810E-03  -.3710630E-03
  -.3561854E-03  -.3382416E-03  -.3169359E-03  -.2920363E-03  -.2489211E-03
  -.1971836E-03  -.1573277E-03  -.1369361E-03  -.1309820E-03  -.1265295E-03
  -.1085890E-03  -.7646863E-04  -.3416982E-04   .7194971E-05   .2118344E-04
  -.8652512E-06  -.3177572E-04  -.4694855E-04  -.4168205E-04  -.1965362E-04
   .6771957E-05   .2360448E-04   .4192940E-04   .7470391E-04   .1131125E-03
   .1435351E-03   .1724343E-03   .2205808E-03   .2935447E-03   .3700885E-03
   .4211476E-03   .4265653E-03   .3851821E-03   .3262682E-03   .2664013E-03
   .2150689E-03   .1962479E-03   .2164396E-03   .2523389E-03   .2686963E-03
   .2522921E-03   .2257486E-03   .2240035E-03   .2562945E-03   .3028415E-03
   .3392217E-03   .3461994E-03   .3213249E-03   .2839084E-03   .2511388E-03
   .2176577E-03   .1662148E-03   .9100805E-04  -.6747220E-06  -.9266013E-04
  -.1439977E-03  -.1176858E-03  -.2107358E-04   .9448895E-04   .1581111E-03
   .1307766E-03   .3785422E-04  -.5028396E-04  -.7840718E-04  -.5058280E-04
  -.1000627E-04   .1067160E-04   .5865412E-05  -.7471865E-05  -.1520952E-05
   .4100670E-04   .1136047E-03   .1869405E-03   .2367249E-03   .2665221E-03
   .2927238E-03   .3294489E-03   .3696852E-03   .3905533E-03   .3780853E-03
   .3417555E-03   .3088450E-03   .2953147E-03   .3010454E-03   .3091085E-03
   .3040166E-03   .2925866E-03   .2935110E-03   .3124284E-03   .3449605E-03
   .3946393E-03   .4546286E-03   .5010106E-03   .5201937E-03   .5185939E-03
   .5050363E-03   .4807606E-03   .4487913E-03   .4153335E-03   .3821700E-03
   .3517233E-03   .3316898E-03   .3241878E-03   .3226389E-03   .3206950E-03
   .3180659E-03   .3231927E-03   .3382486E-03   .3523568E-03   .3550581E-03
   .3482562E-03   .3409991E-03   .3362539E-03   .3286896E-03   .3138269E-03
   .2920169E-03   .2621964E-03   .2298510E-03   .2062012E-03   .1963417E-03
   .1978398E-03   .2012809E-03   .1941621E-03   .1774154E-03   .1640989E-03
   .1653466E-03   .1848939E-03   .2141685E-03   .2386678E-03   .2508789E-03
   .2553521E-03   .2627297E-03   .2783810E-03   .2964983E-03   .3092720E-03
   .3175784E-03   .3249312E-03   .3320378E-03   .3357459E-03   .3329968E-03
   .3259457E-03   .3195272E-03   .3132086E-03   .3024356E-03   .2834037E-03
   .2555023E-03   .2260998E-03   .2055822E-03   .1996266E-03   .2087195E-03
   .2257616E-03   .2383946E-03   .2396083E-03   .2361191E-03   .2362883E-03
   .2382869E-03   .2353343E-03   .2240111E-03   .2087208E-03   .1924138E-03
   .1754210E-03   .1597725E-03   .1464447E-03   .1321519E-03   .1181891E-03
   .1099873E-03   .1096813E-03   .1132114E-03   .1206719E-03   .1381740E-03
   .1606537E-03   .1765148E-03   .1819801E-03   .1817390E-03   .1817373E-03
   .1820977E-03   .1781064E-03   .1677638E-03   .1532861E-03   .1409640E-03
   .1345072E-03   .1334969E-03   .1360089E-03   .1373804E-03   .1332992E-03
   .1262340E-03   .1224496E-03   .1214717E-03   .1172352E-03   .1062138E-03
   .8696453E-04   .6103113E-04   .3433388E-04   .1439455E-04   .2963362E-05
  -.2905621E-05  -.5114062E-05  -.4653530E-05  -.2395397E-05   .2039317E-05
   .9638001E-05   .1896456E-04   .2834030E-04   .3717022E-04   .4334757E-04
   .4631007E-04   .4727085E-04   .4544631E-04   .4059764E-04   .3541073E-04
   .3148611E-04   .2786015E-04   .2394155E-04   .2015530E-04   .1577477E-04
   .9913690E-05   .3485638E-05  -.1419723E-05  -.2384301E-05   .8712031E-06
   .6068275E-05   .1074490E-04   .1423945E-04   .1788664E-04   .2117588E-04
   .2088861E-04   .1512116E-04   .8075194E-05   .6492783E-05   .1240194E-04
   .2128987E-04   .2829308E-04   .3267796E-04   .3554406E-04   .3763059E-04
   .3902789E-04   .4038288E-04   .4235863E-04   .4234002E-04   .3771017E-04
   .3080742E-04   .2731603E-04   .2999587E-04   .3592793E-04   .4030562E-04
   .4087942E-04   .4021343E-04   .4214885E-04   .4766253E-04   .5560471E-04
   .6329238E-04   .6833951E-04   .6999184E-04   .6896179E-04   .6775581E-04
   .6869985E-04   .7127974E-04   .7372860E-04   .7505100E-04   .7588217E-04
   .7706276E-04   .7807991E-04   .7880691E-04   .7934996E-04   .7907548E-04
   .7806429E-04   .7777189E-04   .7941036E-04   .8270935E-04   .8627701E-04
   .8885033E-04   .8921484E-04   .8708853E-04   .8353929E-04   .8010812E-04
   .7774109E-04   .7626247E-04   .7475403E-04   .7303162E-04   .7150122E-04
   .7041165E-04   .6944800E-04   .6827284E-04   .6676010E-04   .6512769E-04
   .6401921E-04   .6411357E-04   .6552082E-04   .6743351E-04   .6914980E-04
   .7037170E-04   .7103833E-04   .7153922E-04   .7211989E-04   .7329876E-04
   .7569059E-04   .7870656E-04   .8129560E-04   .8341373E-04   .8531190E-04
   .8672417E-04   .8748428E-04   .8778971E-04   .8792082E-04   .8793765E-04
   .8791389E-04   .8786943E-04   .8755582E-04   .8706840E-04   .8677334E-04
   .8675516E-04   .8694067E-04   .8709945E-04   .8722204E-04   .8731459E-04
   .8712179E-04   .8640392E-04   .8517206E-04   .8357823E-04   .8167637E-04
   .7976686E-04   .7821021E-04   .7700751E-04   .7590360E-04   .7494301E-04
   .7435217E-04   .7439812E-04   .7480047E-04   .7481314E-04   .7422137E-04
   .7330365E-04   .7235076E-04   .7154055E-04   .7104901E-04   .7102507E-04
   .7129446E-04   .7135645E-04   .7080340E-04   .6978345E-04   .6870077E-04
   .6775858E-04   .6695782E-04   .6629249E-04   .6578350E-04   .6522862E-04
   .6442325E-04   .6343556E-04   .6247458E-04   .6165474E-04   .6100383E-04
   .6043313E-04   .5980555E-04   .5899314E-04   .5801285E-04   .5698552E-04
   .5603857E-04   .5520553E-04   .5434660E-04   .5326470E-04   .5195141E-04
   .5059708E-04   .4940258E-04   .4842058E-04   .4753910E-04   .4665633E-04
   .4579494E-04   .4507899E-04   .4448573E-04   .4387335E-04   .4321269E-04
   .4252670E-04   .4173900E-04   .4078947E-04   .3973529E-04   .3871614E-04
   .3778410E-04   .3686909E-04   .3587704E-04   .3479119E-04   .3368459E-04
   .3265709E-04   .3177168E-04   .3097464E-04   .3016503E-04   .2930702E-04
   .2841691E-04   .2751735E-04   .2658595E-04   .2558401E-04   .2453658E-04
   .2350372E-04   .2251127E-04   .2154262E-04   .2058847E-04   .1965257E-04
   .1871716E-04   .1776511E-04   .1679233E-04   .1581683E-04   .1485213E-04
   .1387938E-04   .1288489E-04   .1190090E-04   .1095952E-04   .1005116E-04
   .9140104E-05   .8203615E-05   .7243897E-05   .6266703E-05   .5280013E-05
   .4316905E-05   .3411636E-05   .2548323E-05   .1675212E-05   .7693678E-06
  -.1496279E-06  -.1057315E-05  -.1948855E-05  -.2835737E-05  -.3728431E-05
  -.4629983E-05  -.5543875E-05  -.6471685E-05  -.7399866E-05  -.8314323E-05
  -.9214106E-05  -.1010745E-04  -.1100255E-04  -.1190159E-04  -.1280169E-04
  -.1369868E-04  -.1458948E-04  -.1547207E-04  -.1635125E-04  -.1723428E-04
  -.1812198E-04  -.1900899E-04  -.1988884E-04  -.2075896E-04  -.2161990E-04
  -.2247434E-04  -.2332519E-04  -.2417534E-04  -.2502626E-04  -.2587714E-04
  -.2672499E-04  -.2756743E-04  -.2840444E-04  -.2923784E-04  -.3006936E-04
  -.3089937E-04  -.3172755E-04  -.3255359E-04  -.3337709E-04  -.3419765E-04
  -.3501492E-04  -.3582895E-04  -.3664006E-04  -.3744836E-04  -.3825373E-04
  -.3905602E-04  -.3985519E-04  -.4065131E-04  -.4144445E-04  -.4223470E-04
  -.4302200E-04  -.4380626E-04  -.4458741E-04  -.4536542E-04  -.4614028E-04
  -.4691198E-04  -.4768050E-04  -.4844584E-04  -.4920797E-04  -.4996689E-04
  -.5072259E-04  -.5147506E-04  -.5222427E-04  -.5297021E-04  -.5371288E-04
