# Supplementary material for: Earthquake Response Analysis of Tall Reinforced Concrete Chimneys considering Eccentricity
Source: Hindawi journal article supplement (doi:10.1155/2020/1417969), 2020-03-11
Supplement: f1 [file 1417969.f1.zip › 1417969.f1/Four kinds of earthquake records/Stiff soil/CHICHI TCU076-V.txt]

PEER STRONG MOTION DATABASE RECORD. PROCESSING BY PACIFIC ENGINEERING.
CHI-CHI 09/20/99, TCU076, V (CWB)
ACCELERATION TIME HISTORY IN UNITS OF G. FILTER POINTS: HP=0.02 Hz LP=50.0 Hz
NPTS= 18000, DT= .00500 SEC
   .5365238E-06   .5647229E-06   .6117805E-06   .6101196E-06   .5867472E-06
   .5704183E-06   .5695159E-06   .5560400E-06   .5465236E-06   .5372397E-06
   .5456523E-06   .5410264E-06   .5245260E-06   .5128001E-06   .5362317E-06
   .5227018E-06   .5563214E-06   .5987015E-06   .5716691E-06   .5788342E-06
   .6186837E-06   .6155468E-06   .5945704E-06   .5449265E-06   .5001440E-06
   .4188071E-06   .3673896E-06   .4798857E-06   .5798092E-06   .5451573E-06
   .4928108E-06   .5886608E-06   .9193218E-06   .9261847E-06   .6304049E-06
   .5312619E-06   .5730974E-06   .5361214E-06   .5316549E-06   .5909619E-06
   .5071513E-06   .6193633E-06   .9254650E-06   .8028100E-06   .4876041E-06
   .4026690E-06   .4988765E-06   .5389714E-06   .5117798E-06   .4883127E-06
   .5666230E-06   .8341087E-06   .8343926E-06   .1136591E-06  -.3307625E-06
  -.1543417E-06   .1137576E-06   .3710314E-06   .3618887E-06  -.1153605E-06
  -.2566522E-07   .4915065E-06   .6885378E-06   .5298035E-06   .5843427E-06
   .5944114E-06  -.3682854E-06  -.4736987E-06   .2944685E-06   .3548301E-06
   .2254363E-06   .4250329E-06   .7317310E-06   .1215615E-05   .1461546E-05
   .8117775E-06  -.1218107E-06  -.2989614E-07   .5635369E-06   .9028352E-06
   .8710020E-06  -.4188142E-06  -.1264390E-05  -.7709558E-06   .5173631E-06
   .1290661E-05   .7168004E-06   .2651768E-06  -.3344093E-06   .5167720E-06
   .1693567E-05   .3084111E-06  -.1812955E-05  -.8051929E-06   .1407468E-05
   .1184488E-05   .7676778E-06   .9337876E-06   .8148554E-06   .5826147E-06
   .5540294E-06   .6380685E-06   .8857012E-06   .2174436E-05   .3507876E-05
   .2585886E-05   .1764695E-05   .1800021E-05   .1524845E-06  -.1186418E-05
   .8706041E-06   .3021690E-05   .2024207E-05   .6328909E-06   .1468601E-05
   .1405353E-05  -.7618276E-07   .5900860E-06   .1998736E-05   .2445229E-05
   .1593225E-05  -.2205863E-06  -.2411555E-05  -.1622640E-05   .1144406E-05
   .2871630E-05   .1959020E-05   .9692741E-07  -.1301133E-05   .3508888E-06
   .4057874E-05   .4206975E-05   .1967234E-05  -.4555118E-06  -.1573940E-05
  -.2833696E-05  -.1182137E-05   .2574619E-05   .2987841E-05  -.1369160E-06
  -.3164785E-05  -.4458113E-06   .2528170E-05   .2266563E-05   .2816081E-05
   .4551231E-05   .4640035E-05   .1668747E-05  -.1868320E-05  -.7077937E-06
   .2511188E-05   .1691955E-05   .1219641E-05   .2495885E-05   .2381432E-05
  -.2068094E-05  -.3077780E-05   .3842799E-06   .7827551E-06  -.3647910E-05
  -.3355256E-05   .6053192E-07  -.2057812E-06  -.1633511E-05  -.1369435E-05
   .1246697E-05   .7263092E-06  -.1405848E-05  -.1670586E-05   .1898814E-05
   .3502426E-05   .8632822E-06  -.2546647E-05  -.7581664E-06   .4009849E-05
   .6389720E-05   .9901849E-05   .6423468E-05  -.1885214E-05  -.4051592E-05
  -.5743872E-06   .5333337E-05   .2353916E-05  -.4341948E-05  -.3017318E-05
   .7606478E-06  -.8057219E-06  -.1542399E-05  -.1100836E-05  -.5692141E-05
  -.7435460E-05  -.2746600E-05  -.1693622E-05  -.4059064E-05  -.2061258E-05
   .7128052E-06  -.4649662E-06   .3832509E-05   .1115189E-04   .8234995E-05
  -.2604080E-06  -.5583668E-05  -.5717832E-05   .5003014E-07   .4164677E-05
  -.3580776E-05  -.8457053E-05   .3096357E-05   .1142367E-04  -.1585617E-05
  -.4873060E-05   .6148570E-05   .8084450E-05   .1831911E-05  -.2825040E-05
  -.1082800E-04  -.1792129E-04  -.8921562E-05  -.1846915E-06  -.8712684E-05
  -.8435020E-05   .2427360E-05  -.5792832E-06  -.5050897E-05  -.6316399E-06
   .3289361E-05   .5029670E-05   .1202171E-04   .1262324E-04   .1049599E-05
  -.4535640E-05   .2724620E-05   .1229782E-04   .2854578E-05  -.1301852E-04
  -.1069566E-04  -.2325958E-05   .1056743E-05   .2942810E-05   .7068009E-05
   .3493034E-05  -.1022195E-04  -.1353824E-04  -.4229305E-05   .6656349E-06
   .6172803E-05   .6795767E-05  -.1124393E-04  -.1678690E-04   .1014661E-05
   .1384401E-04   .1449724E-04   .2917320E-05  -.5198777E-05  -.8874325E-05
  -.1456550E-04  -.1442891E-04  -.8153280E-05  -.6040437E-07   .3115737E-06
  -.9480087E-05  -.1138100E-04  -.1245979E-04  -.9416426E-05   .3511412E-05
   .1427136E-04   .2485076E-04   .2412180E-04   .1518149E-04   .8649416E-05
  -.8564546E-06  -.1597750E-05   .9195443E-05   .1994385E-04   .1649424E-04
  -.7400845E-05  -.9841915E-05   .7008889E-05   .1269873E-04   .2824537E-05
  -.2059161E-05  -.9789100E-05  -.1450123E-04  -.6324114E-06   .1740710E-04
   .9268200E-05  -.4273070E-05  -.3103940E-06   .1341219E-04   .1412941E-04
  -.9194994E-05  -.1603665E-04   .9283480E-05   .2129990E-04   .1138258E-04
  -.7994749E-05  -.2139217E-04  -.1021212E-04  -.1552967E-05  -.1525637E-04
  -.9673102E-05   .9514815E-05   .1662854E-04   .6605349E-05  -.1017779E-04
  -.1190458E-04   .4115968E-06  -.4579599E-05  -.9016364E-05  -.1175551E-06
   .3527054E-05  -.6342351E-05  -.2052157E-04  -.3107188E-04  -.1394142E-04
   .1412811E-04   .1349289E-04  -.6124086E-05  -.1281849E-04  -.2007554E-04
  -.2575969E-04  -.1618878E-04  -.9989597E-05   .2102637E-05   .7502855E-05
  -.3131042E-05  -.8497374E-05  -.5089958E-05   .1024980E-04   .2112992E-04
   .1242573E-04   .1080769E-05  -.2211510E-05  -.3538464E-05   .8963907E-05
   .2064823E-04   .1611042E-04   .1078950E-04   .1361566E-04   .1860854E-04
   .8671499E-06  -.6116648E-06   .1708662E-04   .1855492E-04   .1855114E-04
   .2818575E-04   .1731391E-04  -.8207644E-05  -.9988612E-05  -.5136583E-05
  -.2439684E-04  -.2183378E-04  -.6747091E-05  -.2159288E-04  -.2136499E-04
  -.4862225E-05  -.1142134E-04  -.9654195E-05   .1181973E-04   .1741345E-04
   .1820270E-05  -.5723717E-05   .1043585E-04  -.4772683E-05  -.3726634E-04
  -.2895734E-04   .3672083E-05  -.2250119E-05  -.9451375E-05   .9362584E-05
   .2395032E-04   .2671154E-04   .7490399E-05  -.1031536E-04  -.8897219E-05
   .2619710E-05  -.5427418E-05  -.4463766E-05  -.5213048E-05  -.7147671E-05
   .1750859E-04   .2145761E-04  -.3998616E-05  -.2181089E-04  -.2900469E-04
   .3910896E-05   .1889841E-04  -.1347161E-04  -.2225377E-04   .1010174E-05
   .8704499E-05  -.3265119E-05   .3930485E-05   .1370725E-04   .8480639E-05
   .1881494E-05   .2721521E-05   .1616481E-05  -.1118853E-04  -.2688297E-04
  -.3008069E-04  -.8641950E-06   .2207962E-04   .2107586E-04  -.1603132E-04
  -.6308059E-04  -.4218081E-04   .8453087E-05   .1843731E-04   .1206914E-04
   .3005156E-04   .4891129E-04   .3496332E-04  -.1354394E-04  -.6222366E-05
   .2246258E-04   .1945323E-04   .2244066E-04   .4008665E-04   .2939528E-04
  -.6829626E-06  -.2057906E-04  -.3339476E-04  -.4503957E-04  -.8939199E-05
   .3015957E-04   .1147257E-04  -.7111285E-05   .1578807E-04   .3985459E-04
   .3534139E-04   .1192816E-04   .3589319E-05   .1012929E-04  -.1973381E-04
  -.4919691E-04  -.3982548E-04  -.6255256E-04  -.8169195E-04  -.4286209E-04
  -.1150004E-04   .1646873E-04   .4274995E-04   .1354343E-04  -.2112716E-04
  -.4716556E-05   .2458115E-05  -.2441590E-04  -.4401535E-04  -.2829487E-04
  -.2537331E-04  -.3291750E-04  -.2173744E-04   .1832270E-04   .2744826E-04
  -.2690372E-04  -.4021861E-04   .4734467E-05   .3107180E-04   .1111880E-04
  -.4379107E-05  -.1518396E-04  -.3511927E-05   .9197729E-06   .2794061E-05
   .1577531E-04   .3998732E-05  -.1580585E-05   .9560131E-05  -.7013216E-05
   .1922596E-05   .3175542E-04   .3203459E-04   .1781261E-04  -.8689572E-05
  -.2575186E-04  -.1025324E-04   .1433111E-04   .2938734E-04   .1476792E-04
  -.8996395E-05   .5340856E-05   .2079593E-04   .1232532E-04  -.2539502E-05
  -.1019147E-04   .1117727E-04   .1238031E-04  -.2615175E-04  -.2833266E-04
   .4333727E-05   .7178930E-05  -.2942786E-04  -.1812659E-04   .4662467E-04
   .7509544E-04   .6089513E-04   .2396680E-04   .5249329E-05   .1959101E-04
   .2823883E-04   .2680949E-04   .2130656E-04   .2847846E-04   .4302854E-04
   .4057009E-04   .2344577E-04   .1492185E-04   .3200014E-05   .1552027E-04
   .4300326E-04   .4012096E-04  -.1106806E-05  -.1640783E-04  -.3940893E-05
  -.2746916E-05   .1678783E-04   .3424713E-04   .5771727E-05  -.1374737E-04
  -.1671122E-05   .2157658E-04   .4406501E-04   .1121520E-04  -.2694129E-04
   .1071318E-06   .2629385E-04   .1488448E-04  -.5458604E-05  -.1853900E-04
  -.9597577E-05   .7521089E-05   .4582097E-05  -.1937824E-04  -.5503203E-04
  -.9490146E-04  -.5672093E-04   .1070150E-04   .3026187E-04   .2704733E-04
   .2170052E-04   .3253463E-04   .4202391E-04   .1876462E-04  -.3065598E-04
  -.5420956E-04  -.6799619E-05   .3081910E-04   .1155892E-04  -.2238497E-04
  -.1077366E-04   .3545653E-04   .5279545E-04   .2424790E-04  -.7076399E-05
  -.2196693E-04  -.1426171E-04  -.2550914E-04  -.5028559E-04  -.4779724E-04
  -.5634627E-04  -.4810740E-04  -.3870392E-04  -.1775156E-04   .7823294E-05
   .8195748E-05  -.2167987E-04  -.2496693E-04   .3884841E-04   .7306015E-04
   .2608234E-04  -.3335151E-04  -.5572444E-04  -.4781461E-04   .1050974E-05
   .3644658E-04   .3287279E-04  -.9680578E-05  -.3276289E-04   .8501261E-05
   .1466212E-04  -.6080546E-04  -.8627267E-04  -.4521164E-04  -.1625375E-04
   .2665882E-05   .3650251E-04   .4700462E-04   .3447644E-05  -.1699379E-04
  -.1789875E-04  -.5021442E-04  -.2390125E-04   .2438183E-04   .1750033E-04
  -.1358042E-04   .6525848E-05   .2128364E-04  -.7457620E-05  -.2390519E-04
  -.1942268E-04  -.1737150E-04  -.3838848E-04  -.4082733E-04  -.4800801E-04
  -.3995957E-04   .1994862E-04   .6052676E-04   .3496515E-04   .5715859E-05
   .3099690E-04   .4218471E-04  -.1710486E-04  -.4541922E-04  -.2486941E-04
  -.1070173E-04  -.5669759E-04  -.1068258E-03  -.5392969E-04   .5952668E-05
  -.1512880E-04  -.1562252E-04  -.1036065E-04  -.2429341E-04  -.2068158E-04
  -.9291599E-05   .2136597E-04   .2265320E-04  -.1156368E-04  -.3771863E-04
  -.6392190E-04  -.7022562E-05   .7686237E-04   .3338381E-04  -.2198301E-04
   .3953766E-04   .5937211E-04   .2830185E-04   .3815306E-05  -.2436039E-04
  -.4985179E-04  -.7856004E-04  -.7915676E-04  -.4773217E-04  -.5832893E-04
  -.5035103E-04  -.2026028E-04   .2864771E-05   .1224163E-04   .1103122E-04
   .1518545E-04   .4941990E-04   .9129002E-04   .8745504E-04   .5126787E-04
   .2556402E-04   .1067178E-04  -.5837686E-04  -.8143634E-04  -.1293935E-04
   .6245479E-04   .4807000E-04  -.4878269E-04  -.2642738E-04   .7325239E-04
   .4887020E-04   .6141208E-05   .7562820E-04   .1091821E-03   .3361433E-04
  -.3882940E-04  -.2577036E-04   .1594858E-04   .1296822E-04  -.1244665E-04
   .9055288E-05   .3907428E-04   .3798460E-04   .4631579E-05   .2439526E-04
   .8917896E-04   .9615483E-04   .7002120E-04   .7032118E-04   .6074066E-04
   .8463040E-04   .1336394E-03   .1049488E-03   .7802692E-05  -.7027352E-04
  -.2937754E-04   .7058040E-04   .7002915E-04   .6719445E-05  -.5174911E-05
   .3497397E-04   .2336995E-04  -.4841164E-04  -.4777330E-04  -.9038342E-05
  -.3257446E-04  -.3003232E-04   .3717736E-04   .7176363E-04   .4223265E-04
   .2543610E-04   .2141696E-04   .1798415E-04   .3348389E-04   .2164780E-04
  -.1997285E-04  -.2344286E-04   .1432442E-04   .3038279E-04  -.1868323E-04
  -.6690285E-05   .5199178E-04   .4557640E-04   .1204446E-04   .2413519E-04
   .2312521E-04  -.1709057E-04  -.2377451E-04   .1163768E-04   .5309992E-04
   .5579220E-04  -.1696803E-04  -.7615045E-04  -.1876350E-04   .4016638E-04
   .2479873E-04  -.1740138E-05   .6379584E-05   .4793087E-04   .4826439E-04
  -.2123614E-04  -.1292538E-04   .6045293E-04   .7771870E-04   .3591907E-04
   .3092414E-04   .5302512E-04   .4302841E-04   .3958809E-04   .5974225E-04
   .4646391E-04  -.3366628E-04  -.3554814E-04   .6664949E-04   .1023269E-03
   .3503817E-04  -.1384183E-04  -.5587765E-05   .2028821E-04   .4707421E-04
   .7523890E-04   .7375263E-04  -.1191613E-04  -.4410858E-04   .3818715E-04
   .1068192E-03   .6230886E-04  -.1512770E-04  -.3599783E-04   .2096733E-04
   .8229737E-04   .1071990E-03   .5350179E-04  -.8035697E-04  -.1130132E-03
  -.2599253E-04   .3136774E-04   .8818914E-05  -.3441972E-04  -.1755520E-04
   .3893707E-04   .3897841E-04   .6978044E-05  -.3083772E-04  -.7262710E-04
  -.5405279E-05   .5643699E-04   .1779572E-04  -.2305104E-04   .3268455E-04
   .5958662E-04   .9682519E-05  -.6488231E-04  -.1279763E-03  -.8947876E-04
   .2012302E-04   .5228578E-04   .1129188E-04  -.1577944E-05   .3318205E-04
   .3567462E-04   .7855097E-05  -.1259755E-04  -.2713770E-04  -.2576411E-04
  -.1725175E-04   .9579952E-05  -.1107663E-05  -.6285860E-05   .2080923E-04
   .1252391E-04   .6995819E-05  -.1858666E-04  -.3820998E-04   .1428427E-04
   .7624994E-04   .6361342E-04  -.6551527E-06  -.1353980E-05   .2574880E-04
   .3575865E-06  -.6288258E-04  -.5164976E-04   .5723098E-05   .1490700E-04
  -.4166221E-04  -.8318103E-04  -.7195679E-05   .5580727E-04  -.7565263E-05
  -.2358947E-04   .7142336E-05  -.3194019E-06   .1003087E-04   .3267460E-04
   .4435270E-04   .2694858E-04   .8945375E-05   .5535820E-04   .1267461E-03
   .9398381E-04   .2957065E-04   .5874445E-05   .4621336E-05   .1355964E-04
   .4406802E-04   .6943206E-04   .7105299E-04   .4696546E-04  -.1048954E-04
  -.2740565E-04  -.2898345E-05   .3017845E-04   .6214137E-04   .2914231E-04
   .8854175E-05   .1502817E-04   .1083631E-04   .1241857E-05   .9053556E-05
   .3570160E-04   .3856685E-04   .4395324E-04   .5356370E-04   .2889078E-04
  -.1534567E-05  -.4934737E-05  -.3716829E-05  -.3495650E-04  -.4740095E-04
   .7506034E-05   .3683672E-04   .1244511E-04  -.6893326E-05  -.7622222E-06
  -.2335078E-05  -.1944041E-04   .8366583E-05   .1980349E-04  -.2062565E-04
  -.3072325E-04   .7603384E-05   .3726837E-04  -.8849408E-05  -.5162968E-04
   .1627344E-04   .1017405E-03   .6827332E-04  -.6971391E-05  -.9666729E-05
   .2830838E-04  -.3110655E-05  -.7206359E-04  -.1004226E-03  -.3474209E-04
   .3799843E-04   .2032534E-04  -.1054831E-04  -.4945817E-04  -.4134426E-04
  -.8729682E-05  -.8230352E-05   .2582577E-05  -.7630557E-05  -.1647915E-04
  -.2799528E-05   .7753418E-05   .5579231E-05  -.6202190E-05  -.3931465E-04
  -.4695481E-04   .8742991E-05   .3745414E-04   .3021033E-05  -.3102039E-04
   .5104376E-05   .2428129E-04  -.1997954E-04  -.2330490E-04   .3052769E-04
   .4000191E-04  -.2063183E-05  -.4925648E-04  -.5817483E-04  -.1231667E-04
   .6036312E-04   .1016975E-03   .4510339E-04  -.3965932E-04  -.3990485E-04
   .1288720E-04   .4147000E-04  -.1981059E-04  -.8538695E-04  -.1843517E-04
   .6999577E-04   .4881109E-04  -.5855416E-05  -.1425795E-04   .2091056E-04
   .7359443E-04   .4696768E-04  -.3195738E-04  -.3977746E-04   .9189469E-06
   .1642861E-04  -.4723361E-05  -.3456114E-04  -.3327842E-04  -.3655766E-04
  -.4859891E-04  -.2317974E-04  -.2411949E-05  -.4542467E-05   .3173018E-04
   .1931200E-04  -.7304909E-05   .2088449E-04   .3227078E-04   .8186384E-05
  -.6621236E-05   .7391037E-05   .3819430E-04   .2106536E-04  -.2200487E-04
  -.1652147E-04  -.3777868E-04  -.3044875E-04   .1819172E-04   .2379509E-04
   .4453500E-04   .3525502E-04  -.2480906E-04  -.3442327E-04  -.1051592E-04
  -.9833314E-05   .1384994E-05   .2973905E-06   .1461642E-04   .3050543E-04
   .4773252E-04   .5548271E-04   .2625589E-04  -.4193403E-05  -.5804408E-05
   .2631403E-05   .1277318E-04   .3359879E-04   .2694935E-04  -.5737773E-05
  -.5477655E-04  -.9077572E-04  -.4836938E-04  -.6790068E-05  -.5575615E-04
  -.9233505E-04  -.8733879E-04  -.1224463E-03  -.1382596E-03  -.8898190E-04
  -.3660936E-04  -.1569603E-04  -.3441880E-04  -.7847612E-04  -.1214509E-03
  -.6906367E-04   .3346298E-05  -.2307185E-04  -.8993340E-04  -.4767194E-04
   .2483718E-04   .2966834E-05  -.1007941E-04  -.5567071E-04  -.6103686E-04
   .3081513E-05   .4548220E-04  -.5189759E-05  -.6083906E-04  -.2479610E-04
   .4526482E-04   .4242505E-04   .2894681E-05  -.1795953E-04  -.1975202E-04
  -.2313272E-05  -.4137181E-04  -.9951116E-04  -.1284519E-03  -.4608279E-04
   .7220201E-04   .3651838E-04  -.5605410E-04  -.4590231E-04   .1862259E-04
   .5417132E-04   .2166198E-04  -.3422057E-04  -.3035105E-04   .5556459E-05
   .1516381E-04   .4677487E-05   .2661860E-06  -.3734458E-05  -.4331721E-04
  -.7917389E-04  -.7729747E-05   .4587411E-04  -.5765829E-04  -.1232777E-03
  -.8679975E-04  -.6091052E-04  -.4101511E-04  -.2035527E-04   .3692389E-04
   .1053834E-03   .9480635E-04   .2409111E-04  -.1318917E-04  -.9412451E-05
  -.4657639E-04  -.1165615E-03  -.7585314E-04  -.6659167E-05  -.2634625E-04
  -.1595067E-04   .3040722E-04   .4448251E-04  -.4377497E-05  -.1842990E-04
   .2162661E-04   .7468445E-05  -.1396257E-05   .5873747E-04   .5500093E-04
  -.3782839E-04  -.1209671E-03  -.1153511E-03  -.5212649E-04  -.3308414E-04
  -.1157903E-04  -.6162300E-05  -.1834079E-04  -.3961542E-04  -.5858839E-04
  -.5109156E-04  -.2297055E-04  -.1163245E-04   .2639198E-04   .5356809E-04
   .5659902E-05  -.3513341E-04  -.3802874E-04  -.3594852E-05   .4998054E-04
   .7799312E-04   .5489910E-04  -.9765286E-05  -.3694327E-04  -.4857437E-04
  -.7679757E-04  -.2769741E-04   .5742819E-04   .8419487E-05  -.4631955E-04
  -.1739279E-04   .2885146E-04   .2170186E-04  -.6108720E-04  -.4499653E-04
   .2428379E-04   .3061316E-04  -.1345650E-04  -.7702229E-04  -.7892627E-04
  -.2642618E-04  -.3214149E-05   .2086706E-04   .2394587E-05  -.8727072E-04
  -.7015866E-04   .2673054E-04   .2571789E-04  -.2509607E-04  -.4367439E-04
  -.7593772E-05   .5323858E-04   .7133003E-04   .3106046E-04  -.1213069E-04
  -.4306301E-04  -.4980090E-04  -.2557568E-04  -.2073316E-04   .3522511E-05
   .6826531E-04   .7198932E-04   .4023738E-04   .1427350E-04   .1209827E-04
   .3605981E-04   .3271099E-04   .1309303E-04   .5507053E-04   .1120362E-03
   .6359729E-05  -.1263071E-03  -.1228189E-03  -.7042393E-04  -.2961338E-04
  -.2282386E-04  -.1468614E-04   .1241400E-04   .4433159E-04   .1676916E-04
  -.7640629E-04  -.1298135E-03  -.6321760E-04   .6126076E-04   .9283837E-04
   .7345408E-04   .4522241E-04   .2814109E-04  -.1769659E-04  -.3573998E-04
   .2974330E-04   .4090008E-04   .3004924E-04   .5498110E-04   .6634294E-04
   .3859193E-04   .3693557E-04   .5572000E-04   .2566099E-04  -.2474597E-04
   .2568044E-04   .1371090E-03   .1197446E-03  -.8250193E-05  -.4196406E-04
   .2801703E-04   .4804478E-04   .8851125E-05  -.1005309E-04   .8780707E-05
   .4194522E-04   .2319282E-04  -.2919872E-04  -.3980612E-04  -.3599120E-04
  -.5396559E-04  -.2840299E-04   .6963723E-04   .5904915E-04  -.1503569E-04
  -.1344673E-04   .4607411E-04   .8187940E-04   .4569520E-04  -.4505892E-04
  -.6672357E-04  -.3300887E-04  -.1323816E-04  -.2441856E-04  -.3836882E-04
  -.5404343E-04  -.8947848E-05   .2266648E-04  -.1482039E-04  -.3725641E-04
  -.4226785E-04  -.5265848E-04  -.6038949E-04  -.5025284E-04  -.1565815E-04
   .1925098E-04   .4299063E-04   .2085277E-04  -.3048475E-04  -.2853093E-04
  -.1265630E-04  -.4211901E-04  -.6781709E-05   .5851368E-04   .4682746E-04
  -.1666194E-04  -.7475340E-04  -.3977571E-04   .4093214E-04   .5490887E-04
   .2947587E-04  -.3241084E-04  -.8672975E-04  -.6877255E-04  -.4471786E-04
   .1384600E-05   .2929095E-04   .1395470E-04  -.1476420E-05  -.1490328E-04
  -.7528457E-04  -.1104289E-03  -.6623166E-04  -.3772868E-04   .1785931E-04
   .1003051E-03   .9936515E-04   .2642324E-04  -.6845274E-05   .3028931E-04
   .2762588E-04  -.6820756E-05   .2365243E-04   .3116113E-04   .2116183E-04
   .2600730E-04   .1515427E-04  -.9328232E-04  -.1741184E-03  -.6609860E-04
   .9856462E-04   .1356638E-03   .7417409E-04  -.4161402E-04  -.8968828E-04
  -.5087579E-05   .1200156E-03   .7834920E-04  -.5669196E-04  -.4513794E-04
   .2987091E-04   .2166762E-04  -.2527965E-04   .7672847E-05   .6417813E-04
   .4111245E-04   .2209539E-04   .8806561E-04   .7678703E-04  -.3184095E-04
  -.7055268E-04   .4828309E-05   .4573348E-04   .1476515E-04  -.1681545E-04
  -.5052544E-04  -.8402090E-04  -.3865466E-04   .3367306E-04   .1303998E-04
  -.2293706E-04  -.1078533E-04   .1933004E-04   .3327364E-04  -.3897781E-05
  -.3316745E-04  -.3634153E-04  -.1500116E-04   .1457980E-04   .4961064E-04
   .6903196E-04   .7008537E-04   .3795782E-04  -.4211417E-04  -.5583824E-04
  -.1601272E-05   .3202578E-05  -.5638757E-04  -.7283680E-04  -.5488006E-04
  -.7663170E-05  -.2266509E-06  -.1329739E-04  -.3995561E-05  -.5195349E-06
  -.3361354E-04  -.5616792E-04  -.2421948E-04   .1143531E-04   .2079331E-04
   .3529237E-04   .2119935E-05  -.9322040E-04  -.6587894E-04   .7515811E-04
   .1148649E-03   .3372313E-04  -.2097859E-04  -.7449051E-05   .3698717E-05
  -.2477503E-04  -.9170714E-05   .7370278E-04   .1058344E-03   .6416420E-04
   .1932200E-04   .2616902E-04   .1127963E-04  -.6612965E-04  -.8952339E-04
  -.1786567E-04   .5352326E-04   .3190094E-04  -.3491418E-04  -.3448816E-04
  -.1312660E-04  -.4092184E-04  -.2391325E-04  -.1693619E-04  -.3111669E-04
  -.4721489E-05   .8012554E-05   .1068668E-04  -.9696794E-05  -.2789391E-04
  -.3357277E-04  -.1767278E-04   .1405700E-04   .4111358E-04   .3048523E-04
  -.1493945E-04  -.7723102E-04  -.8254310E-04  -.1949981E-04   .1980162E-05
  -.4424962E-04  -.2209789E-04   .2655878E-04   .2049702E-04   .7855853E-05
   .2047714E-04   .6957553E-05   .2020758E-04   .6242425E-04   .6827773E-04
   .3367860E-04   .3359818E-04   .5470394E-04   .3252513E-04   .6426001E-05
   .2587338E-04   .2971866E-04   .7053441E-05   .1289258E-05   .5887434E-04
   .1116682E-03   .2678824E-04  -.2616780E-04   .3383717E-05   .2627869E-04
   .5400105E-04   .8746636E-04   .5337606E-04  -.2898413E-05  -.2208412E-04
  -.3747402E-04  -.7533257E-04  -.1383316E-03  -.1291272E-03  -.1836460E-05
   .6664383E-04  -.2882491E-04  -.9712996E-04  -.3887057E-04   .2139747E-04
   .1888384E-04  -.2773963E-04  -.1088587E-03  -.1075620E-03  -.2179502E-04
   .1771354E-04  -.2828113E-04  -.6379394E-04  -.1929044E-04   .3787948E-04
  -.1203813E-05  -.4976802E-04  -.3417703E-05   .4508444E-04   .4947837E-04
   .1121165E-04  -.1863448E-04   .4458957E-04   .9717080E-04   .8061701E-04
   .3834150E-04  -.2399931E-04  -.6017771E-04  -.1909815E-04   .4257731E-04
   .4744506E-04   .3242370E-04   .1820342E-04  -.1446882E-04  -.5821741E-04
  -.9853176E-05   .5337912E-04   .2031675E-04   .1016448E-04   .5370896E-04
   .8692502E-04   .9154657E-04   .4417624E-04  -.1445767E-04  -.4311531E-04
  -.2275621E-04  -.9634409E-05  -.6484287E-04  -.7498113E-04  -.1294594E-04
  -.1201250E-04  -.1625620E-04  -.9314345E-05   .2747528E-04   .5038918E-04
  -.7617912E-05  -.7202139E-04  -.5865603E-04   .1675959E-04   .4828206E-04
   .5627855E-04   .8998193E-04   .7607606E-04  -.7669730E-05  -.3891904E-04
  -.1554969E-04  -.1010746E-04   .1140713E-04   .3107973E-04   .4883458E-04
   .4626522E-04  -.6803921E-05  -.3134050E-04   .1864538E-05   .4271066E-04
   .3907003E-04   .3924523E-04   .4998132E-04   .3630929E-04   .2913348E-04
   .1897515E-04   .1432959E-05   .3816131E-05   .4071296E-04   .4579707E-04
  -.6190084E-04  -.1649914E-03  -.1295851E-03  -.3177685E-04   .1857408E-04
  -.3330579E-04  -.5355602E-04  -.8633391E-05   .1692259E-04   .6496276E-05
  -.1185435E-04  -.3437208E-04  -.1407042E-04   .1753964E-04  -.2919335E-04
  -.5938385E-04  -.4191295E-04  -.1062451E-04   .6550398E-05   .1198648E-04
   .3384255E-04   .1190906E-05  -.8616123E-04  -.6109704E-04  -.6465387E-05
   .2079713E-05  -.1226934E-04  -.2462279E-04   .9011471E-05   .3682293E-04
   .4957250E-04   .6090572E-04   .5017765E-04  -.3488703E-04  -.1211838E-03
  -.4451766E-04   .6955711E-04   .3922068E-04  -.8087068E-04  -.8575097E-04
   .4064901E-04   .7715529E-04   .3421824E-05  -.4689120E-04   .1887753E-04
   .9160693E-04   .4103781E-04   .5519593E-05   .4786982E-04   .6124223E-04
  -.3939395E-05  -.3667437E-04  -.8750807E-05   .1215599E-04  -.2635194E-05
  -.3581595E-04  -.1902035E-04   .3366534E-04   .4444388E-04   .3378900E-04
   .1638009E-04  -.3061032E-06  -.1046347E-04  -.4118125E-04  -.3943538E-04
   .2262869E-04  -.1236633E-04  -.6773476E-04  -.2540891E-05   .6915087E-04
   .6002006E-04   .3973744E-04  -.3488277E-04  -.6504215E-04   .3557705E-04
   .1088103E-03   .4800700E-04  -.8938287E-04  -.1001867E-03  -.5947802E-04
  -.9476019E-04  -.6709480E-04   .2260444E-04   .7902345E-05  -.4472101E-04
  -.3381140E-04  -.6468474E-04  -.7113713E-04  -.5719065E-04  -.6447792E-04
  -.1368005E-04   .1289548E-04  -.4895484E-04  -.5045116E-04   .3604424E-04
   .7051912E-04  -.8513923E-05  -.7051264E-04  -.4392261E-04  -.1949461E-04
  -.3255841E-05   .1512473E-04  -.5060506E-04  -.1135249E-03  -.6100392E-04
   .2451481E-04   .4638793E-04  -.1455732E-04  -.7296260E-04  -.6349508E-04
  -.2336427E-04  -.1812878E-04  -.2766407E-04  -.3327029E-04  -.1951478E-04
   .1364587E-04   .3116018E-04   .1384127E-04   .2988960E-04   .2306431E-04
   .1667028E-04   .8668147E-05  -.2703435E-04  -.1848371E-04   .3154099E-04
   .4666075E-04   .1962084E-04  -.5461602E-04  -.9347476E-04  -.5277935E-04
   .3080429E-04   .8129935E-04   .3930723E-04  -.7185691E-04  -.4598831E-04
   .5484825E-04   .6451666E-04   .2231263E-04  -.5692136E-05   .4097861E-04
   .3697270E-04  -.6226440E-04  -.1064322E-03  -.6136084E-04  -.1975953E-04
  -.6832626E-04  -.9852403E-04   .2657846E-04   .1335750E-03   .8359072E-04
  -.3993234E-06  -.6853815E-04  -.8624706E-04  -.5616308E-04  -.2126871E-05
   .3521029E-04  -.1582849E-04  -.1001598E-03  -.7624778E-04   .5631224E-04
   .1077270E-03   .2825960E-04  -.5224452E-04  -.3596913E-04   .4005336E-06
  -.8807726E-05   .7382226E-05   .7641842E-05  -.5537677E-04  -.3816019E-04
   .4660904E-04   .7652089E-05  -.3894018E-04   .2055635E-04   .8177861E-04
   .7102556E-04   .1705065E-04  -.9270122E-05  -.1150398E-04  -.1797990E-04
   .1762978E-04   .6057440E-04   .1078060E-04  -.1088798E-03  -.1297902E-03
  -.4730647E-04   .2694700E-04   .1423003E-04   .1533880E-04   .5714607E-04
   .7736676E-04   .5025994E-04  -.1454326E-04  -.3207442E-04   .4246501E-05
   .6138577E-04   .9499123E-04   .6039660E-04   .9201545E-05  -.5256428E-04
  -.4058559E-04   .3043987E-04   .5174367E-04   .2729757E-04  -.9229079E-06
   .3803180E-04   .5062605E-04   .2944153E-05  -.6218173E-04  -.8556433E-04
  -.2350198E-04   .5177576E-05  -.1077044E-04   .5238715E-06   .1825922E-04
  -.2461934E-04  -.1892792E-04   .2550193E-04   .5806865E-04   .4081844E-04
  -.4998259E-04  -.9973016E-04  -.6349407E-04  -.2433615E-04  -.5143081E-04
  -.4894606E-04  -.2759466E-05   .1604132E-04   .5034217E-05  -.3555664E-05
   .6661068E-06   .2624917E-05   .1159899E-04   .2448453E-04   .4321762E-05
  -.4408904E-06  -.1174644E-04  -.2596552E-04  -.2756463E-04   .1360543E-04
   .1255757E-04  -.4745044E-04  -.3579159E-04   .9801792E-06   .1757360E-04
  -.1175954E-05   .8699333E-05   .2156002E-04   .9785318E-05  -.1228797E-04
  -.3238278E-04  -.4861841E-04  -.8609532E-04  -.3779671E-04   .2764404E-04
   .2325932E-04  -.4322402E-05   .2184061E-05   .3531956E-04   .3234468E-04
  -.1473910E-04  -.7192292E-04  -.5950688E-04  -.3672138E-04  -.3193286E-04
  -.2184576E-06  -.2290216E-05  -.1600634E-04  -.6136801E-05   .1416316E-04
   .4591640E-04   .5977987E-04   .2708615E-04  -.4888102E-05  -.7387934E-05
   .2064808E-04   .6129099E-04   .2152276E-04  -.1771511E-04   .2638457E-04
   .6689366E-04   .3480005E-04  -.8568361E-05  -.1492592E-05   .3592204E-04
   .3249385E-04  -.7564927E-05  -.4022841E-04  -.4211226E-04  -.6137388E-04
  -.3397330E-04   .2340141E-04   .9962650E-05  -.4949088E-04  -.9066057E-04
  -.2374996E-04  -.5710031E-05  -.3680035E-04  -.4773278E-04  -.1267232E-05
   .6361409E-04   .4489253E-04   .3914835E-04   .2808973E-04  -.3160896E-04
  -.6624010E-04  -.2016029E-04   .4366050E-04   .4636538E-04   .3148954E-04
   .8251913E-05  -.3159008E-04  -.1199853E-04   .6554142E-04   .6275321E-04
   .1875039E-04   .5574571E-04   .8310353E-04   .5150289E-04   .4372772E-04
   .9577117E-06  -.5335419E-04  -.3775386E-04   .1418875E-04   .3690128E-04
  -.5631759E-05  -.3836336E-04  -.4012830E-04  -.1688598E-04   .3960406E-05
   .6018248E-05  -.8285443E-06   .7548835E-05   .3256079E-04   .3654039E-04
   .3247320E-04   .2778714E-04   .2367020E-04  -.2492498E-05   .7270470E-05
  -.3926608E-05  -.9755280E-04  -.1163718E-03  -.2209879E-04   .5087663E-04
  -.1893785E-04  -.1301724E-03  -.9239120E-04   .1824590E-04   .6932976E-04
   .7666369E-04   .6490256E-04  -.2681692E-04  -.9731290E-04  -.7124760E-04
  -.1075200E-04   .1594751E-04  -.5427270E-05  -.2615167E-04  -.2778653E-04
  -.1158793E-03  -.1779555E-03  -.1163599E-03   .6954531E-05   .5779049E-04
   .3348733E-04  -.1825937E-04  -.4468671E-04  -.7466934E-04  -.6635338E-04
   .9188446E-05   .3268651E-04  -.3012402E-04  -.6807111E-04  -.3707460E-04
  -.1931178E-04  -.5567541E-05   .3093975E-04   .3218379E-04   .4182061E-05
  -.7230070E-05   .8466627E-05   .4545851E-04   .6960886E-04   .6033357E-04
   .1168392E-04  -.3082751E-04   .1017009E-04   .6240356E-04   .3861298E-04
  -.1407127E-04  -.3633322E-04   .2690785E-04   .6472656E-04  -.7654607E-04
  -.1280842E-03   .1111439E-04   .5413362E-04   .1996798E-05   .8101192E-05
   .1816225E-04  -.2084666E-04  -.3932920E-04  -.3637970E-04   .1422884E-05
   .6836914E-04   .5914428E-04  -.6378902E-05  -.5650531E-04  -.5914147E-04
  -.1887796E-04   .9534214E-05   .1646748E-04   .2316503E-04  -.7505807E-05
  -.1547657E-04   .2625544E-04   .4294964E-04   .3713655E-04   .1774107E-04
  -.8213923E-05  -.5188072E-04  -.9752441E-04  -.9102231E-04  -.5010229E-04
  -.9360415E-05   .8042035E-05   .4261754E-05   .8569217E-07  -.7632570E-05
  -.3018694E-04  -.2390346E-04  -.7149316E-05  -.1562606E-04   .2512439E-04
   .8972130E-04   .6246154E-04  -.1217636E-04  -.4997858E-04  -.2450160E-04
   .7936123E-05   .1022569E-04  -.1030527E-05   .7284775E-05   .2564896E-04
  -.2529133E-05  -.3339481E-04  -.3894375E-04  -.2641012E-04  -.3458559E-04
  -.6129595E-04  -.3330628E-04   .7765611E-04   .8978720E-04   .1172128E-05
  -.5761358E-04  -.2076936E-04   .1872748E-04  -.7539433E-04  -.1368298E-03
  -.2321373E-04   .8320030E-04   .5121855E-04  -.1227876E-04  -.1530434E-04
   .4714122E-05   .1706520E-04   .3282665E-04   .2623569E-04  -.6912533E-05
  -.3643811E-04  -.4274543E-04  -.4508664E-04   .3103552E-04   .6203442E-04
  -.5677459E-04  -.8220797E-04   .2223137E-05  -.7074151E-06  -.1055913E-04
   .2807375E-05  -.2024822E-04  -.1507534E-04   .4610035E-05  -.5334758E-04
  -.3408448E-04   .4177933E-04   .1689473E-04  -.9042897E-05   .4223922E-04
   .2160479E-04  -.5831369E-04  -.6704847E-04   .1935598E-04   .7521836E-04
   .2895158E-04  -.5153647E-04  -.6052848E-04   .1072025E-04   .4087604E-04
   .9281196E-05  -.1303522E-05   .2982254E-04   .4039957E-04   .4395560E-04
   .5971173E-04   .5881525E-04   .2388902E-04  -.1418576E-04  -.4620187E-04
  -.5580117E-04  -.2213035E-04  -.2761084E-06  -.1542399E-04   .1368298E-04
   .4993044E-04  -.2035579E-04  -.1360099E-03  -.1219527E-03  -.1707825E-04
   .3805999E-04   .4216192E-04   .9934128E-05  -.3332266E-04  -.3767386E-04
  -.2969507E-04  -.2336982E-04  -.3054162E-04  -.1206900E-04   .3468045E-04
   .2644425E-04  -.2983316E-04  -.2685493E-04   .4120841E-04   .6432530E-04
  -.1076065E-04  -.6827529E-04  -.4278174E-04  -.1964613E-04  -.1187281E-04
  -.2033331E-05   .2125414E-04   .6858604E-04   .5295992E-04   .1821600E-04
   .5847575E-04   .1016914E-03   .1069064E-03   .6455482E-04  -.2465478E-04
  -.6038905E-04   .1282517E-05   .3929863E-04   .3301262E-05  -.4922285E-04
  -.8039054E-04  -.8467206E-04  -.7579843E-04  -.1126435E-03  -.5977608E-04
   .3405308E-04   .5336246E-04  -.2506140E-04  -.9977414E-04  -.5758004E-04
  -.4607210E-05  -.3562859E-04  -.1988196E-04   .1149771E-04  -.5304059E-05
  -.4094853E-05  -.9886427E-05  -.1640939E-04   .6144510E-05   .2975822E-04
   .6723246E-05   .6696691E-05   .1964532E-04   .9248819E-05  -.1024497E-05
  -.2539255E-04  -.1031907E-03  -.9920097E-04  -.1004210E-04  -.5158849E-05
  -.7490170E-05   .1273884E-04   .1359814E-04  -.7074431E-05  -.3412521E-04
  -.1654899E-04   .4441805E-04   .6860664E-04   .2985487E-04  -.9548664E-05
   .2939306E-05   .1220459E-04  -.6452300E-04  -.7885859E-04   .8674905E-05
   .9726367E-04   .1021910E-03   .4475450E-04  -.1383027E-04   .1315611E-05
   .2606651E-04   .1249837E-04  -.2051360E-04  -.7612989E-04  -.7335563E-04
   .9195689E-05   .3516002E-04  -.2200642E-04  -.2866887E-04   .3696217E-04
   .8216438E-04   .4663154E-04  -.3984276E-04  -.3627766E-04  -.1796434E-04
  -.2935924E-04  -.5061938E-05  -.4456399E-05  -.6399637E-05   .2696108E-04
   .3184011E-04   .1259365E-04   .3412965E-04   .4972624E-04   .7305468E-05
   .8380355E-06   .1797107E-04   .3656555E-05  -.5109660E-04  -.8570176E-04
  -.1772437E-04   .3509062E-04   .4404972E-04   .6467043E-04  -.2416701E-04
  -.5712243E-04   .4397466E-04   .8346989E-04   .3540968E-04  -.2640720E-04
  -.3890676E-04  -.3181186E-04  -.7264472E-05   .3465203E-04   .3146324E-04
   .2786854E-05  -.2510398E-04  -.5634411E-04  -.8035747E-05   .6093659E-04
   .3355912E-04  -.2867883E-04  -.1504508E-04   .3641860E-05   .2942275E-04
   .4371199E-04   .6642934E-05  -.6359942E-05  -.6122956E-05   .1607817E-04
   .2325648E-04   .6056976E-05  -.1379788E-04  -.2541750E-04   .1654108E-04
   .6918446E-04   .5869140E-04  -.4606822E-05   .4324171E-05   .5230038E-04
   .4750802E-04   .1998693E-04  -.9866614E-05   .1470193E-04   .6436045E-04
   .5846568E-04  -.1158478E-04  -.3678972E-04  -.1509969E-04  -.2130753E-04
  -.1463566E-04   .2865986E-04   .3241140E-04   .3271458E-05  -.1855067E-04
  -.3308880E-04  -.3216431E-04  -.1476599E-04   .4471897E-04   .6108767E-04
   .4670104E-04   .4375535E-04   .2304168E-04  -.2340137E-05  -.7273417E-05
   .7544392E-05   .5096930E-04   .9135167E-04   .5126611E-04   .5879663E-06
   .1531993E-04   .2016631E-04  -.5194305E-04  -.1318173E-03  -.8387917E-04
   .1732137E-04   .6510012E-04   .6608796E-04   .4046211E-04  -.6383629E-05
   .1597544E-04   .1017734E-03   .1178833E-03   .1493554E-04  -.4614003E-04
  -.2560292E-04  -.2010415E-04  -.2080618E-04  -.5403130E-05  -.4614061E-05
  -.3126324E-04  -.2905069E-04  -.2189417E-05   .7195000E-05   .5136563E-06
  -.1201548E-04  -.3450515E-04  -.1806813E-04   .3148540E-04   .3286253E-04
   .7555677E-05   .2962455E-04   .4799554E-04   .4688868E-05   .6623653E-05
   .3899723E-04   .2510798E-05  -.3103117E-04  -.5341817E-05   .3923894E-04
   .2928796E-04   .5541334E-05   .4433481E-05  -.4026944E-04  -.4206787E-04
   .1488338E-04   .1284820E-04   .2693287E-04   .5183385E-04  -.3983071E-04
  -.9138375E-04  -.5265515E-04  -.4963034E-05  -.9629052E-06  -.3351426E-04
  -.3084949E-04   .5615371E-05   .4172337E-04   .7792757E-06  -.1003033E-03
  -.1059465E-03  -.6597384E-04  -.2808711E-04   .1744328E-04   .7780665E-04
   .9266839E-04   .4865290E-04  -.3131221E-04  -.5980148E-04   .9652613E-06
   .4409014E-04   .4091883E-04   .2275730E-04   .2669736E-04   .2083503E-04
   .2073576E-06  -.7797894E-05  -.2285330E-05  -.7484921E-05  -.3357738E-04
  -.2058829E-04   .3074327E-04   .2470030E-04  -.3243002E-04  -.4656783E-04
  -.3637055E-04  -.6993679E-05   .1544793E-04  -.2790275E-04  -.2134967E-04
   .1456602E-04   .2306231E-04   .1135305E-04  -.4518387E-04  -.5401868E-04
   .1068746E-05   .3778568E-04  -.4085718E-05  -.3177368E-04  -.2781938E-04
  -.5720481E-04  -.4965152E-04  -.1221922E-04  -.2111197E-04   .1842259E-06
   .9040454E-04   .9347704E-04   .2624061E-04  -.3287571E-04  -.3112867E-04
   .7258898E-05   .4126677E-04   .8133301E-05  -.6065131E-04  -.3066484E-04
   .2558548E-04   .1630924E-04   .9787308E-05   .4700903E-04   .2139341E-04
  -.3319997E-04  -.4952692E-04  -.2417747E-04   .2193501E-04   .6096911E-04
   .2565646E-04   .2407539E-05   .9090980E-05   .6493945E-05  -.1960363E-04
  -.6971422E-04  -.5372968E-04  -.9606768E-05  -.1786029E-04  -.2736755E-04
   .1195676E-05   .3752424E-04   .2838398E-04  -.4449484E-05   .5937187E-05
   .7805688E-04   .1373540E-03   .9155868E-04  -.6216783E-04  -.9891600E-04
  -.5771263E-05   .5906974E-04   .2360015E-04  -.4508841E-04  -.3036645E-04
   .2316680E-04   .1430908E-04  -.2162897E-04  -.6091900E-04   .2348849E-04
   .6457828E-04  -.3268422E-05  -.3403589E-04  -.4127541E-04  -.2430421E-04
  -.4424461E-04  -.3596974E-04   .8337231E-05  -.3755713E-04  -.8236176E-04
  -.5008774E-04   .3803587E-05   .8290583E-04   .5827662E-04  -.7966378E-04
  -.1412360E-03  -.5049278E-04   .5473451E-04   .2708127E-04  -.7188899E-04
  -.7863036E-04  -.1720082E-04   .6732204E-04   .6939225E-04  -.4763819E-04
  -.9440716E-04  -.4963862E-05   .3711690E-04  -.1981815E-04  -.5001589E-04
  -.4054336E-04  -.1420021E-04  -.1450521E-04  -.6220019E-04  -.5518652E-04
   .5208300E-05   .4784134E-04   .1928428E-04  -.3853398E-04  -.3671119E-04
   .4331389E-06   .2119252E-05  -.3279415E-04  -.2363610E-04   .3902722E-04
   .6729783E-04   .1963445E-04  -.6084128E-04  -.1014740E-03  -.5086169E-04
   .2578722E-05  -.3373599E-04  -.1029389E-03  -.8431205E-04   .1433735E-04
   .2022586E-04  -.1139847E-03  -.2156785E-03  -.1810952E-03  -.4396516E-04
   .6095512E-04   .2557477E-04  -.6352389E-04  -.3485748E-04   .2995259E-04
  -.1063418E-04  -.1438628E-03  -.1449800E-03  -.4931694E-04  -.6267356E-04
  -.5779750E-04   .3992251E-05  -.1667321E-04  -.6991686E-04  -.1018820E-03
  -.3274361E-04   .1796033E-04  -.5153624E-04  -.8307838E-04  -.7553752E-06
   .5403744E-04   .5593074E-04   .4715826E-04   .3117116E-04   .3091729E-04
   .2244877E-04   .2108260E-05   .4376416E-05   .3309085E-04   .3743657E-04
   .5149385E-04   .7618574E-04   .2060218E-04  -.2811665E-04  -.3958877E-04
  -.8824275E-04  -.6318793E-04   .3057200E-04   .4896187E-04  -.3033440E-05
  -.4691540E-04  -.1093688E-04   .7138963E-04   .6325268E-04   .8977802E-05
   .1458420E-04   .2603066E-04   .8572963E-05  -.5878060E-05  -.1722431E-05
   .2251825E-05   .1922075E-04   .6499813E-04   .5347225E-04   .1553691E-05
  -.1441021E-04  -.9231231E-06  -.1092157E-05  -.3964947E-04  -.5087163E-04
  -.2939580E-05   .4401455E-05  -.3337328E-04  -.6572091E-04  -.1592371E-04
   .3111312E-04   .1640645E-04  -.1463361E-04  -.3826772E-04  -.6354683E-05
   .6067909E-04   .1225622E-04  -.9726866E-04  -.1117366E-03  -.4330563E-04
   .2906768E-04   .4471772E-04   .1727944E-04  -.3945412E-04  -.1174293E-04
   .5589642E-04   .4305085E-04   .5381694E-05   .1142382E-04  -.4749758E-05
  -.1136220E-04   .1808982E-04  -.8617905E-05  -.4518162E-04  -.1882022E-04
  -.3226548E-04  -.3834096E-04  -.2500814E-04  -.5226581E-04  -.4837025E-04
   .1480516E-04   .7155966E-04   .1750552E-04  -.7085010E-04  -.6535298E-04
   .5712720E-05   .1968814E-04  -.2862277E-05  -.4905194E-04  -.5515148E-04
  -.3367931E-04  -.1113867E-04   .4284015E-05  -.3162962E-05  -.3904439E-04
  -.5829891E-04  -.2407121E-04   .1380048E-05  -.1367598E-04   .1388861E-04
   .6511970E-04   .7788121E-04   .5496125E-04   .2523190E-04   .2027834E-04
  -.2568434E-04  -.7891046E-04  -.2551369E-04   .3435286E-04   .1236650E-04
  -.3915746E-04  -.3187443E-04  -.4488633E-05  -.1939399E-04  -.3230486E-04
  -.4300649E-04  -.4949938E-04  -.2221994E-04  -.6443818E-06  -.3121004E-04
  -.4988591E-04   .1306802E-04   .7665687E-04   .7187299E-04   .2437233E-05
  -.7494037E-04  -.4855529E-04   .3888464E-04   .2938922E-04  -.6098153E-04
  -.8976185E-04  -.9757623E-04  -.4744637E-04   .3565015E-04   .5424628E-04
   .1917046E-04  -.4903695E-04  -.5232344E-04   .3568829E-06  -.1424606E-04
  -.1255231E-03  -.9121209E-04   .4808146E-04   .3229715E-04  -.5009757E-05
   .3394727E-04   .3310196E-04  -.2618282E-04  -.1975935E-04   .8111437E-04
   .1325005E-03   .5037496E-04  -.5767402E-04  -.6700799E-04   .1458994E-04
   .1930414E-04  -.9573386E-04  -.1138151E-03   .4364168E-05   .4842251E-04
  -.1720544E-04  -.4067863E-04  -.3450264E-05   .1632632E-04   .6291972E-05
   .5708971E-05   .3471079E-04   .5920970E-05  -.9339397E-04  -.7715560E-04
   .3417544E-04   .3912010E-04  -.5827087E-04  -.6740148E-04  -.1686858E-07
   .2438018E-04   .1457624E-04   .2768784E-04   .1998241E-04  -.3500910E-04
  -.6205404E-04  -.3419630E-04  -.1869876E-04  -.2260792E-04  -.3857344E-04
  -.8518769E-04  -.1352509E-03  -.2278781E-04   .9529809E-04   .6138066E-04
  -.2075182E-04  -.3974448E-04  -.3359319E-05  -.2705061E-04  -.3452887E-04
   .3447929E-04   .6555766E-04   .1169474E-04  -.2744702E-05   .2764501E-04
   .3891070E-04  -.5383781E-05  -.1943106E-04   .2919504E-04   .2178679E-04
  -.4985204E-04  -.1172735E-04   .9240423E-04   .6687508E-04  -.2444147E-04
  -.3818316E-04  -.8496709E-04  -.1238134E-03  -.6447487E-04  -.2826877E-04
  -.7712455E-04  -.7636447E-04  -.7601962E-05  -.8649914E-05  -.6842158E-05
   .1710400E-04   .1484601E-04   .3188323E-05  -.8981578E-05  -.2693889E-04
  -.3029653E-04  -.1106969E-04   .4080828E-04   .3382581E-04   .7793272E-05
  -.1793265E-04  -.9253874E-05   .3397799E-04   .4477225E-04   .3771990E-04
   .2069180E-04  -.5238410E-05  -.3366514E-04  -.1333184E-04   .1308000E-04
  -.5979720E-04  -.6549233E-04   .7711899E-05  -.3378286E-05  -.1739370E-04
  -.3448155E-04  -.6707434E-04  -.1645969E-04   .2419187E-04   .5281970E-05
   .4247262E-04   .9192392E-04   .5653462E-04  -.4543741E-04  -.7013833E-04
  -.2541666E-04   .3759114E-04   .7471523E-04   .5639114E-04  -.1957105E-04
  -.4721508E-04   .3710877E-04   .5118228E-04  -.6580395E-04  -.1327107E-03
  -.4692721E-04   .5773445E-04   .5081440E-04  -.9506208E-05  -.5247060E-04
  -.4592088E-04   .2373111E-04   .7880003E-04   .6998686E-04   .2015371E-04
   .1522808E-05   .3855270E-04   .7529895E-04   .5634040E-04  -.1746995E-04
  -.9006250E-04  -.1168296E-03  -.4098043E-04   .1329709E-06  -.3463419E-04
  -.3115543E-04  -.6564979E-05   .8432268E-05   .7592642E-04   .7951242E-04
   .1122755E-04  -.1610908E-04  -.1787833E-04  -.5255648E-04  -.6317836E-04
  -.7124119E-04  -.8307025E-04  -.8529742E-04  -.3003708E-04   .4467520E-04
   .4319166E-04   .4401006E-05  -.3271682E-04  -.9353290E-04  -.6944736E-04
  -.4457046E-05   .2865902E-05   .1222766E-04   .3179587E-04   .4365856E-04
   .2763888E-04  -.6309902E-05  -.3374945E-04  -.2969048E-04  -.2562433E-04
  -.1342097E-04  -.3872023E-05  -.2247998E-04  -.2143178E-04   .1876735E-04
   .7853633E-04   .3407189E-04  -.9401620E-04  -.9146174E-04   .4307726E-05
   .2503411E-04  -.7090697E-05   .1700345E-04  -.2571660E-04  -.1003633E-03
  -.6210881E-04   .7186602E-05  -.1476923E-04  -.3772230E-04   .1903118E-04
  -.7166665E-05  -.7526455E-04  -.8732475E-04  -.8487937E-04  -.5643738E-04
   .1715185E-04   .4998823E-04   .5510291E-04   .3633807E-04  -.2660206E-04
  -.2761736E-04   .1236600E-05   .1236292E-04  -.4509745E-04  -.6936627E-04
   .4707719E-05   .5476814E-04   .5064598E-04   .1214960E-04  -.3201964E-04
  -.1624029E-04   .3210506E-04  -.7428500E-05  -.8473200E-04  -.5119148E-04
   .5381824E-04   .6075428E-04  -.6557506E-04  -.7931682E-04   .4192658E-05
  -.4508025E-04  -.9078912E-04   .8139938E-06   .1013799E-03   .1059637E-03
   .1356302E-04  -.3479567E-04  -.6761188E-05   .1901101E-04  -.4914394E-05
  -.6301530E-04  -.4139667E-04   .4002496E-04   .3266502E-04  -.5707156E-04
  -.6812927E-04  -.4488646E-04  -.7193359E-04  -.9237099E-04  -.1008855E-03
  -.1044442E-03  -.7735401E-04  -.4944903E-04  -.3806417E-04  -.1446517E-04
   .1153379E-04  -.2248850E-05  -.7325698E-04  -.1292415E-03  -.1097850E-03
  -.4509308E-04  -.4830901E-04  -.6524849E-04  -.2476281E-04   .4382976E-04
   .1174063E-03   .7581528E-04  -.1859387E-04  -.1723552E-04   .1857040E-05
  -.1059080E-04  -.2978129E-04  -.3363925E-04  -.4692151E-04   .4741794E-05
   .4961090E-04  -.1613092E-04  -.5945918E-04  -.2933760E-04   .3092462E-04
   .4170900E-04  -.4916503E-05  -.6763523E-04  -.2826425E-04   .5122869E-04
  -.1132066E-04  -.2875615E-04   .3650464E-04   .2433482E-04  -.1545509E-04
   .6295800E-06   .4733028E-04   .1684689E-04  -.9067208E-04  -.7173749E-04
   .2239712E-04   .1370206E-04   .3220748E-04   .7523752E-04   .5709791E-04
   .3277033E-04   .3010909E-04   .3393859E-04   .7385899E-05   .1414113E-04
   .2576183E-04   .4115217E-04   .9221336E-04   .5170602E-04  -.1634170E-04
  -.1510433E-04   .2857160E-04   .8994466E-04   .9070685E-04   .4084187E-04
  -.3511478E-06  -.7170610E-04  -.5881564E-04   .3470308E-04   .5461843E-04
   .1216836E-04  -.1647579E-04  -.2724468E-04  -.1471455E-04   .1815770E-04
   .2104395E-04  -.6391774E-04  -.5720086E-04   .5575612E-04   .5026277E-04
   .4281129E-05   .4664680E-04   .8893518E-04   .1212904E-03   .1198497E-03
   .8548292E-04   .9466966E-05  -.1962055E-04   .3747118E-04   .7372251E-04
   .5464304E-04   .5198581E-04   .1620668E-04  -.1693706E-04   .2179305E-05
   .4475985E-04   .2811497E-04  -.1116285E-04   .4234219E-04   .9148094E-04
   .3504736E-04  -.3142960E-04  -.1875526E-04  -.2832682E-04  -.4964893E-04
  -.7648305E-04  -.6063856E-04   .7006346E-05   .1252175E-04  -.1279539E-04
  -.4833771E-05   .8739287E-06  -.1188471E-04  -.1387897E-04  -.5885476E-04
  -.3128074E-04   .8532286E-05  -.3731604E-04  -.5903127E-04  -.2530271E-04
   .2773290E-04   .4642721E-04   .3237190E-04   .2181947E-06   .9998571E-05
   .3715633E-04   .3787858E-04   .3877193E-05   .4985012E-06  -.5910140E-05
  -.1183979E-04   .9371716E-05   .4309706E-04   .3398292E-04   .2169388E-04
   .6200634E-04   .5849916E-04   .1690741E-04   .3974403E-04   .9340940E-04
   .7305950E-04   .1564887E-04  -.4419912E-04  -.4355635E-05   .2923382E-04
  -.8190375E-04  -.1062940E-03  -.9178678E-05   .2955285E-04  -.1834680E-04
  -.2390666E-04   .4193323E-04   .8386597E-04   .7598769E-04   .5234636E-04
   .2297942E-04  -.1536930E-04  -.6438521E-04  -.4598297E-04  -.9611291E-05
  -.5224813E-04  -.7868097E-04  -.3460289E-04  -.2087093E-04  -.3303147E-04
   .6585205E-05   .4427995E-04   .2478416E-04  -.9003377E-04  -.1409131E-03
  -.7804764E-04  -.6687858E-04  -.4535424E-04   .3234577E-04   .3118871E-04
  -.5179441E-04  -.8475730E-04  -.8525443E-04  -.2029731E-04   .4354285E-04
   .6417331E-04   .5851823E-04   .2718959E-04  -.6739679E-05  -.3201063E-04
  -.1766784E-04   .6437263E-08  -.1744126E-04  -.2859320E-04  -.2011016E-04
   .2019472E-04   .3532567E-04   .4068524E-05  -.3348110E-04  -.2215184E-04
   .8884113E-05   .2418216E-04   .3914612E-04   .3000322E-04  -.7360590E-06
  -.4113461E-04  -.4395573E-04   .6542254E-05   .8668064E-05  -.3642138E-05
   .3712442E-04   .6990448E-04   .2976371E-04  -.3498941E-04  -.2119136E-04
   .3237062E-04   .1324316E-04  -.2827366E-04  -.2170937E-04   .4422196E-04
   .2263575E-04  -.3586251E-04  -.3007846E-04  -.5200053E-04  -.1783338E-04
   .6564559E-04   .7509131E-04  -.9871299E-05  -.6690556E-04  -.2708487E-04
   .9374865E-05   .3344560E-05   .4096163E-04   .5597353E-04  -.8831644E-05
  -.1037108E-03  -.6909189E-04   .4281952E-04   .5855654E-04   .8551121E-05
  -.1128537E-04   .2161362E-04   .7738695E-04   .6144901E-04  -.3772900E-05
  -.2657166E-04   .6082623E-04   .1290164E-03   .8474324E-04   .5501366E-04
   .3702405E-04   .3575300E-04   .8711317E-04   .4938270E-04  -.8865851E-05
   .1423458E-04   .5301989E-04   .7919929E-04   .4145839E-04  -.3134816E-04
  -.3296567E-04  -.1205307E-04  -.3860428E-04  -.6911380E-05   .7582756E-04
   .1111318E-03   .6199836E-04   .2432207E-04   .1565065E-04   .1682250E-04
   .3527650E-04   .2182391E-04  -.3575416E-04  -.6022749E-04  -.4772089E-04
  -.8248200E-04  -.7216636E-04  -.5633827E-04  -.9037100E-04  -.3833683E-04
   .2358683E-04  -.3887901E-05  -.2713112E-04   .4898264E-05   .3926350E-04
   .3036565E-05  -.2187465E-04  -.3773472E-04  -.1083270E-03  -.5433447E-04
   .4438306E-04  -.2671988E-05  -.5066565E-04  -.5927486E-05   .6214405E-04
   .7306764E-04   .2831623E-04  -.1386703E-04  -.3358785E-04  -.1754731E-04
   .1618624E-04   .5340055E-04   .4850513E-04  -.4413099E-04  -.7788603E-04
  -.1349410E-04  -.1492951E-04  -.2708727E-04   .2637831E-04   .8790286E-05
  -.1170703E-03  -.1109256E-03   .1949806E-05   .4089439E-04   .1144368E-04
  -.6944596E-05   .1222212E-04   .3478956E-04  -.6165213E-05  -.4725364E-04
   .2854604E-04   .1362179E-03   .1060336E-03   .3657199E-04   .5333829E-04
   .8852932E-04   .3835082E-04  -.1285663E-04  -.4328121E-04  -.4205524E-05
  -.1013715E-04  -.1524390E-03  -.1652356E-03  -.2777910E-04   .4773148E-04
   .3045090E-05  -.6450059E-04  -.1224761E-04   .6110710E-04   .1827486E-04
  -.2635779E-04  -.3479264E-04  -.7385460E-04  -.2583364E-04   .6113559E-04
   .6184346E-04   .3454594E-04   .1611458E-04   .1500227E-04   .3621465E-04
   .3221517E-04   .1380599E-04   .4782187E-04   .8710765E-04   .3761887E-04
   .4740204E-05   .1431093E-04   .1454165E-04  -.2767351E-05  -.3891588E-04
  -.5293072E-04  -.2844597E-04  -.1882983E-04  -.1299216E-04   .1119852E-04
   .5115826E-04   .5039425E-04  -.4373469E-04  -.7023909E-04   .2574749E-04
   .5333043E-04   .1481519E-04  -.3747691E-05   .2779448E-04   .2740969E-05
  -.2365022E-04  -.4846637E-04  -.3540129E-04   .3362925E-05   .2553027E-04
   .3907872E-04   .2918395E-04  -.1204598E-04  -.6472543E-04  -.6424587E-04
  -.5744189E-04  -.3822181E-04  -.5136395E-04  -.9976320E-04  -.3965558E-04
   .2759593E-04  -.8899101E-05  -.8457904E-04  -.1264719E-03  -.6408534E-04
   .2654338E-04   .6026848E-04   .2340269E-04  -.4213299E-04  -.5851458E-04
  -.3481390E-04  -.4653023E-04  -.5435077E-04  -.7667068E-04  -.1229744E-03
  -.1405111E-03  -.6865876E-04  -.1822355E-04  -.2145880E-04   .9794067E-05
   .3482557E-04   .1596784E-05  -.7170172E-04  -.8125888E-04  -.1676421E-04
   .2544494E-04   .1687281E-04   .1064276E-04   .4531837E-04   .6859601E-04
   .4419630E-04   .4077136E-04   .5711161E-04   .4491543E-04   .3633389E-04
   .2455597E-04   .1682270E-04   .3542276E-04   .3343810E-04   .1467818E-05
  -.4074412E-04  -.5254728E-04  -.1691105E-04   .1641308E-04   .6696567E-05
  -.2628781E-04  -.3835849E-04  -.5659684E-04  -.5108121E-04  -.8228742E-04
  -.1282291E-03  -.9567713E-04  -.7811704E-04  -.4679699E-04   .1434732E-04
   .5628447E-04   .2135402E-04  -.6875956E-04  -.9337745E-04  -.5044247E-04
   .1789899E-04   .8289752E-04   .5606485E-04  -.4207504E-04  -.1072797E-03
  -.6892954E-04   .2847789E-04   .5958701E-04   .5599568E-04   .3665392E-04
  -.2220784E-04  -.3170394E-04  -.2793127E-04  -.4159639E-05   .7751098E-05
   .1633440E-04   .5136484E-05   .2068121E-04   .4669878E-05  -.7375951E-04
  -.3516737E-04   .6497499E-04   .6005318E-04   .1465807E-04   .6643790E-05
  -.2054020E-04  -.1303269E-04  -.4776178E-05  -.4269078E-05  -.3278848E-05
  -.2040571E-04  -.1549890E-04   .8204487E-05   .8603381E-05  -.3061205E-04
  -.5158381E-04  -.2638739E-04  -.1446175E-04  -.8375466E-05   .1486082E-04
   .4687526E-04   .2850162E-04  -.2291680E-04  -.5023034E-04  -.8860418E-04
  -.5824153E-04  -.6300741E-05  -.4361812E-04  -.7394573E-04  -.2391607E-04
   .2398458E-04   .2231852E-04   .5403112E-05   .6299105E-05   .1810985E-05
  -.1077928E-04  -.9263248E-05  -.6156084E-04  -.6113316E-04   .2518020E-05
   .3035253E-04   .6974008E-05  -.3730152E-04  -.4334014E-04   .3500507E-04
   .1099865E-03   .7176259E-04  -.7967148E-05  -.3394144E-04   .1891138E-04
   .2675945E-04  -.4620065E-04  -.5343192E-04   .1485253E-04   .5254646E-04
   .1646122E-04   .1091268E-05   .2406670E-05   .2610063E-04   .3212590E-04
   .2337217E-04   .2716095E-04   .1091798E-04   .2093398E-05  -.4412377E-04
  -.6064574E-04   .1097049E-04   .4853742E-04   .2217446E-04  -.1080471E-04
  -.1040514E-04   .5106978E-04   .8178622E-04   .6617814E-04  -.2730349E-04
  -.6904096E-04  -.2808443E-04  -.8526024E-04  -.1231109E-03  -.6236149E-04
   .1648814E-04   .6644947E-04   .6093633E-04  -.4263924E-06  -.2452281E-04
   .1171685E-04   .5280407E-04   .3278587E-04  -.4979638E-04  -.1236181E-03
  -.5973872E-04   .3655317E-04  -.3222115E-05  -.4375493E-04  -.1445104E-04
  -.8337352E-05   .9656282E-05   .5362144E-04   .3605226E-05  -.3979581E-04
  -.6435813E-05   .2265651E-04   .3520527E-04   .7047313E-04   .7636695E-04
   .8545537E-04   .7327284E-04   .2077839E-05  -.1052801E-04   .7431935E-04
   .1060908E-03   .4081545E-04  -.9268855E-05   .5755899E-05   .5729105E-04
   .5602739E-04  -.2216429E-04  -.2040918E-04   .2675844E-04   .3648878E-04
   .3130834E-04  -.2775992E-04  -.1225945E-03  -.9102698E-04   .5405080E-04
   .8844202E-04   .1791825E-04  -.1453061E-04   .3803428E-05   .2676822E-04
   .3639342E-04   .2238154E-06  -.1005784E-04   .4280392E-04   .7597052E-04
   .4642145E-04   .4135088E-04   .3247279E-04  -.5011623E-04  -.4160852E-04
   .1793993E-04  -.1566957E-04  -.8391969E-04  -.5296364E-04   .1653199E-04
   .2953650E-04   .6618899E-06  -.3815234E-04  -.6536660E-04  -.8826913E-04
  -.5872533E-04   .1392351E-04   .1803887E-04  -.2657434E-04  -.6693722E-04
  -.3891700E-04   .1493751E-04   .2343807E-04   .2698429E-04   .5321659E-04
  -.2970175E-05  -.2379902E-04   .5873490E-04   .7604604E-04   .1778342E-04
  -.2578370E-04  -.6891238E-04  -.5152361E-04   .4165606E-04   .4313405E-04
   .5732223E-06   .1510070E-04  -.1010166E-04  -.6536560E-04  -.1842790E-04
   .2360206E-04  -.3554621E-04  -.5724054E-04  -.5546216E-04  -.9579114E-04
  -.5668502E-04   .4437831E-04   .5042978E-04  -.1941641E-04  -.3242090E-04
   .1710647E-04   .4768191E-04   .7244145E-05  -.2918040E-04  -.3054059E-04
  -.2348289E-04  -.5111058E-04  -.2798706E-04   .1711984E-04  -.5451797E-04
  -.9841940E-04  -.3712582E-04  -.3808096E-06   .4534259E-06  -.1252174E-04
  -.4339129E-04  -.6583256E-05   .3709737E-04   .1066845E-04  -.6908713E-04
  -.7019403E-04   .8280886E-06   .7981635E-05   .3199478E-04   .5894081E-04
   .5498766E-04   .3686047E-04   .3888742E-04   .3276203E-04   .2047210E-04
   .4601300E-04   .6830156E-04   .4049053E-04  -.1247021E-04  -.6387033E-04
  -.3888159E-04  -.2635499E-04  -.1527664E-03  -.1768906E-03  -.1695224E-04
   .8517056E-04   .4974828E-04  -.5454253E-04  -.8337823E-04  -.8769420E-05
   .7151095E-04   .7253502E-04   .7328438E-05   .1508953E-04   .5412159E-04
   .2693928E-04   .3786392E-05   .1010895E-04   .4890662E-04   .4594257E-04
   .5460614E-04   .4966740E-04   .8716025E-05  -.3981260E-04  -.4984864E-04
  -.2127508E-04  -.3618108E-05   .1628326E-04   .2441609E-05  -.9912449E-05
   .4231799E-05   .3247632E-04   .8776308E-04   .8609753E-04   .4965826E-05
  -.3129031E-04   .1099989E-04   .3888523E-04  -.2250455E-04  -.5425731E-04
  -.3202699E-04   .8528133E-05   .5702653E-04   .6405611E-04   .3341976E-05
  -.2321292E-04  -.6553724E-05   .5308774E-05   .5328447E-04   .5244624E-04
  -.3105744E-04  -.9496287E-04  -.2924312E-04   .8738568E-04   .8254237E-04
   .8236019E-07  -.3620045E-04   .2363155E-04   .8548622E-04   .7938877E-04
   .1860558E-04  -.3285847E-04  -.3040195E-04  -.1655823E-05   .5149720E-04
   .1339106E-04  -.6803276E-04  -.1740283E-04   .8189613E-04   .9133069E-04
   .2970497E-04  -.6075539E-05   .3992629E-05   .7313809E-05  -.1157610E-04
   .1536591E-04   .2543634E-04   .4042167E-05   .2525372E-04  -.5786375E-05
  -.2457128E-04   .2966402E-04   .3797127E-04  -.6454262E-05  -.1222527E-04
  -.2333963E-04   .1485247E-05   .3061037E-04   .2126028E-04   .5189840E-05
   .1374634E-04   .3691809E-04  -.1932138E-04  -.1054244E-03  -.4540352E-04
   .4222457E-04   .4665967E-04   .2651936E-04  -.6382612E-05  -.1433619E-04
   .1415059E-04   .5769499E-04   .5569713E-04  -.5524657E-04  -.1481148E-03
  -.7795999E-04   .2839111E-04   .2953744E-04  -.9200453E-05   .3118893E-04
  -.9247643E-06  -.1567727E-03  -.2315333E-03  -.1734562E-03  -.5627005E-04
   .4346662E-04   .4214855E-04  -.2071422E-04  -.3443302E-04  -.3087611E-04
  -.1830412E-04   .5156662E-04   .5988031E-04  -.2045734E-04  -.6359206E-04
  -.1115972E-04   .5723608E-04   .4870098E-04   .1599841E-04   .3999377E-04
   .7855483E-04   .7593681E-04   .2144658E-04  -.2202013E-04   .1965182E-05
   .2461818E-04   .6039258E-04   .5500295E-04   .3138938E-04   .6360513E-04
   .6106022E-04   .1641734E-04  -.1275107E-04  -.8157197E-05   .4647854E-04
   .2350570E-04  -.3269125E-04  -.1879314E-06   .4996070E-04   .4842641E-04
  -.2191544E-05  -.3121101E-04  -.1003922E-04   .4167470E-04   .8746213E-05
   .1209574E-04   .7666937E-04   .4379281E-04  -.2371370E-04  -.5111864E-04
  -.4213581E-04  -.8626482E-05   .1741950E-04   .7047581E-05  -.2209470E-04
  -.4298151E-04  -.8607644E-04  -.6021319E-04   .1097721E-04   .3072129E-04
   .1391322E-04  -.1340886E-04  -.4674239E-04  -.7042067E-05   .3764687E-04
   .2588077E-04   .4692627E-05  -.3159554E-05  -.1990561E-04  -.1203054E-04
  -.6531577E-05  -.3891354E-04  -.1072626E-06   .6670355E-04   .6109822E-04
   .3878518E-04   .1522357E-04  -.2060432E-04  -.1806512E-04   .9552881E-05
   .2783325E-04   .4418368E-04   .3440492E-04   .9722725E-05   .2025519E-04
   .7544430E-04   .5755130E-04  -.2840024E-04  -.7391567E-04  -.4170221E-04
   .2916784E-04   .5532462E-04   .4622362E-04   .2749417E-04  -.1673805E-04
  -.9020566E-04  -.6920744E-04   .2745799E-04   .9958097E-04   .5618178E-04
  -.1272196E-04   .2348489E-04   .3227896E-04  -.9196290E-05  -.3764750E-04
  -.2165605E-04  -.3465938E-04  -.6223632E-04  -.4536092E-04  -.7945171E-04
  -.4602493E-04   .2902773E-04   .3465414E-04   .2558026E-04   .6605430E-04
   .7214326E-04   .4024947E-04  -.4322330E-04  -.1486447E-03  -.8870319E-04
   .4190682E-04   .4649387E-04   .2511942E-04   .5826199E-04   .8316856E-04
   .8724857E-04   .9136973E-04   .5604931E-04  -.1130310E-04  -.6625660E-04
  -.5155393E-04  -.8247881E-05   .1502575E-04  -.2684801E-04  -.6474453E-04
  -.9495123E-04  -.4560016E-04   .3063139E-04  -.9862338E-05  -.2402106E-04
   .5205571E-04   .4616911E-04  -.1633217E-04  -.4220681E-04  -.4288994E-05
   .5144714E-04   .3617127E-04  -.2274773E-04  -.3482116E-04  -.1397641E-04
   .3692568E-04   .7084804E-04   .4119638E-04   .3564061E-05   .5036468E-06
   .2103181E-04   .4683832E-04   .3681919E-04   .9230368E-05   .3281799E-05
   .1749509E-05  -.3641080E-05   .7394368E-04   .1593957E-03   .9729628E-04
   .1280905E-04   .4767763E-04   .5678224E-04  -.1105437E-04  -.3327495E-04
   .1308325E-04   .4638147E-04   .8249220E-05  -.3049282E-04  -.1512549E-04
   .4785360E-04   .4253915E-04   .2143320E-04   .1833207E-04   .3059447E-04
   .7327743E-04   .6022300E-04   .1075144E-04  -.6952613E-05   .2511297E-04
   .6254117E-04   .6119982E-05  -.1156466E-04   .1392694E-05  -.3144670E-04
  -.3569480E-04  -.8440086E-04  -.1185642E-03  -.6476277E-04  -.3881550E-04
  -.1547165E-04   .3661145E-04   .5323694E-04   .4462389E-04   .3405626E-04
   .4013034E-04   .3223726E-04   .2083229E-05  -.3733898E-04  -.5768884E-04
  -.7112389E-04  -.1228503E-03  -.1259873E-03  -.4704276E-04   .7057181E-05
   .3167446E-04   .3132377E-04  -.4503566E-05  -.5217488E-04   .5276797E-05
   .1028383E-03   .7957844E-04   .1148959E-04   .2930376E-04   .4525299E-04
  -.6140567E-04  -.9917417E-04  -.2137821E-04  -.3594154E-04  -.4632988E-04
   .3478319E-04   .7804433E-04   .3986291E-05  -.6129143E-04  -.2101342E-04
   .7089856E-04   .1142216E-03   .6924093E-04   .2162635E-04  -.1141622E-04
  -.2086741E-04  -.3271569E-04  -.4271815E-04  -.7584725E-05   .4868159E-04
   .3531143E-04  -.6457552E-05   .3722996E-04   .6263695E-04   .1376901E-04
  -.2883847E-04   .1822999E-04   .7320652E-04   .3959799E-04  -.5500410E-04
  -.1352969E-03  -.9129626E-04   .1164925E-04  -.1302233E-04  -.6122058E-04
   .7790921E-05   .8135815E-04   .5137041E-04   .1610667E-04   .6074448E-04
   .6489491E-04   .2498574E-04   .1750356E-04   .8129801E-05   .2970278E-04
   .6260067E-04   .4099746E-04   .6082928E-05  -.2565100E-04  -.7891619E-04
  -.3234222E-04   .1813347E-04  -.2396615E-04  -.1681990E-04   .2837936E-04
   .2406710E-05  -.9050830E-04  -.6767512E-04   .4166962E-04   .7053877E-04
   .4545299E-04   .1860624E-04   .1628295E-04   .3987794E-04   .4550617E-04
   .4231248E-04   .3676909E-04   .3283942E-04   .6088316E-05   .2483667E-04
   .3742138E-04  -.5466770E-04  -.5788953E-04   .6193963E-04   .9460738E-04
   .4920296E-04   .3652617E-05  -.3545211E-04  -.4979466E-04  -.1417251E-04
  -.8805733E-05  -.7844413E-04  -.9684634E-04  -.9127871E-04  -.4591095E-04
   .2066362E-04   .5797148E-04   .2817556E-04  -.1944308E-04   .1547205E-04
   .7748545E-04   .8852256E-04   .3879288E-04  -.1070876E-03  -.2042057E-03
  -.1176066E-03  -.3001445E-04  -.1554672E-04  -.3641119E-04  -.3877790E-04
   .2824968E-04   .6712285E-04   .2216174E-04  -.1019534E-04  -.3850020E-04
  -.4123859E-04  -.7547892E-05   .4432608E-04  -.7863350E-05  -.6219376E-04
   .7891448E-05   .9039168E-04   .7685940E-04  -.1419530E-04  -.7046826E-04
  -.5433734E-04   .5043637E-05   .4574359E-04  -.6850840E-05  -.9260693E-04
  -.8314201E-04  -.3257624E-04  -.7429292E-04  -.9433756E-04  -.2162170E-04
   .2190443E-04   .1670372E-04   .6795991E-04   .5216155E-04   .4742854E-05
   .5819216E-05  -.1678486E-04  -.8243756E-05  -.2820119E-04  -.9221123E-04
  -.3856083E-04   .2326081E-04  -.1972093E-04  -.6937019E-05   .5236788E-04
   .2178922E-04   .8023309E-05   .9378478E-04   .9833057E-04   .1782038E-04
  -.6185285E-05   .3873493E-04   .4617287E-04   .1453588E-04  -.9014882E-05
  -.7144357E-05   .5352510E-04   .6375557E-04   .3461333E-04   .6010469E-04
   .5986441E-04   .1644512E-04  -.3088158E-05   .1433520E-04   .6446208E-04
   .9524238E-04   .2130571E-04  -.4938692E-04   .9459271E-05   .5321288E-04
  -.4574625E-04  -.7855417E-04  -.1280041E-04  -.4333890E-05  -.4098079E-04
  -.2414410E-04  -.2361476E-05  -.4239529E-04  -.4305948E-04   .6678826E-05
   .9437072E-05  -.5057870E-04  -.5533698E-04  -.3201861E-04  -.3050058E-04
  -.5595254E-05   .4586122E-04   .2770460E-04  -.5220250E-04  -.6887510E-04
  -.6246099E-04  -.7888822E-04  -.1263935E-03  -.1326206E-03  -.5823995E-04
   .3898380E-04   .5249553E-04   .2312565E-04   .3001101E-04   .5469147E-04
   .6400744E-04   .1047292E-04   .5641592E-05  -.1510590E-04  -.8479774E-05
   .6603115E-04   .8231914E-04   .4841516E-04   .2041823E-04  -.9480459E-06
  -.1295138E-04   .1616791E-05  -.2651654E-04  -.3364040E-04  -.4213990E-05
  -.1903893E-05   .3932235E-04   .8104215E-04   .1466946E-04  -.1472436E-04
   .1979661E-04   .1841645E-04  -.1138663E-04   .2552176E-05   .1276991E-04
   .2755573E-04   .2333776E-04  -.2602934E-04  -.4431631E-04   .1545946E-04
   .3895724E-04  -.1165100E-04  -.1728332E-04   .3938112E-04   .4087333E-04
  -.1795270E-04  -.2691392E-04   .9137414E-05   .7909912E-05  -.6862539E-04
  -.1017910E-03  -.1893598E-04   .2193857E-04   .1150183E-04   .3149668E-04
   .3827562E-04   .9077836E-05  -.3689344E-04  -.4885361E-04  -.2165682E-04
  -.3164808E-05   .2458912E-04   .4464618E-04   .3272198E-04  -.4072246E-04
  -.7645811E-04  -.1197624E-04   .5106578E-04   .2565931E-04   .2101949E-04
   .6634338E-04   .7895095E-04   .3639636E-04  -.3905953E-06   .1986063E-04
   .7952694E-04   .5961390E-04  -.2251000E-04  -.2276137E-04   .1711381E-04
  -.3830711E-04  -.1649181E-04   .8017510E-04   .5427057E-04  -.2423773E-04
  -.3701377E-04   .2307241E-04   .3883510E-04  -.2287823E-04  -.5063536E-04
   .2191641E-04   .8065275E-04   .4929661E-04  -.1697459E-04  -.5010096E-04
   .3389716E-04   .1009635E-03   .5247444E-04   .4001418E-05   .1253540E-04
  -.3220265E-04  -.5158345E-04   .3927924E-04   .8392365E-04   .5712508E-04
   .1310757E-05  -.4478082E-04   .3833493E-04   .1137750E-03   .7086195E-05
  -.8109119E-04   .6490002E-06   .9615745E-04   .8056006E-04  -.2520017E-04
  -.8845891E-04  -.6697556E-05   .8177827E-04   .6330535E-04   .4076149E-04
   .4531650E-04  -.9065105E-06  -.5066672E-04  -.1745473E-04   .5001829E-04
   .4025739E-04  -.1600920E-04   .1240836E-04   .7463668E-04   .9970148E-04
   .6944838E-04  -.3867354E-04  -.4381836E-04   .3167113E-04   .7546870E-04
   .5942127E-04  -.6053197E-05  -.2346844E-04  -.1372895E-04  -.2024268E-04
   .4980909E-04   .2688873E-04  -.8994906E-04  -.7456560E-04  -.2970873E-04
  -.2666460E-05   .2070110E-04  -.4080107E-04  -.1133992E-03  -.9207735E-04
  -.4437264E-04  -.1935646E-04   .4499935E-05  -.3530776E-04  -.6086130E-04
   .2560793E-04   .1059064E-03   .4315675E-04  -.1890308E-04   .3735752E-04
   .1204793E-03   .8852467E-04  -.4652283E-04  -.9494425E-04  -.2257989E-04
   .2456599E-04  -.2581278E-04  -.1116587E-03  -.1768866E-03  -.2206362E-03
  -.2456673E-03  -.2995924E-03  -.4176367E-03  -.4969851E-03  -.4836874E-03
  -.4168089E-03  -.3660639E-03  -.3701231E-03  -.4109451E-03  -.6369688E-03
  -.1278873E-02  -.2551712E-02  -.4831446E-02  -.8696873E-02  -.1455452E-01
  -.2221880E-01  -.3020878E-01  -.3529705E-01  -.3341070E-01  -.2185481E-01
  -.2126823E-02   .1934506E-01   .3463452E-01   .3973119E-01   .3686715E-01
   .3124784E-01   .2570586E-01   .1958712E-01   .1204535E-01   .4381615E-02
  -.1231300E-02  -.4473479E-02  -.6835287E-02  -.1028326E-01  -.1644867E-01
  -.2467222E-01  -.2994108E-01  -.2634401E-01  -.1469027E-01  -.3501279E-02
  -.1868776E-03  -.4214178E-02  -.1170998E-01  -.2223026E-01  -.3548704E-01
  -.4499153E-01  -.4282847E-01  -.3008692E-01  -.1647727E-01  -.8537685E-02
  -.3943796E-02   .7030566E-03   .4119540E-02   .5986456E-02   .1137428E-01
   .2389667E-01   .3973036E-01   .5340156E-01   .6355194E-01   .6689494E-01
   .5460660E-01   .2436067E-01  -.9165493E-02  -.2646986E-01  -.2261998E-01
  -.5861091E-02   .1665148E-01   .4019077E-01   .5484469E-01   .5265733E-01
   .3997806E-01   .2790628E-01   .1358755E-01  -.1261346E-01  -.4348234E-01
  -.5809189E-01  -.5091976E-01  -.3954173E-01  -.3781121E-01  -.3976947E-01
  -.3791793E-01  -.3919903E-01  -.5027186E-01  -.6203640E-01  -.6227399E-01
  -.5264279E-01  -.4039812E-01  -.2296058E-01   .4865508E-02   .3582278E-01
   .5622387E-01   .6317234E-01   .6409778E-01   .6198911E-01   .5311555E-01
   .3664712E-01   .1533445E-01  -.1155908E-01  -.4471628E-01  -.7562664E-01
  -.9156895E-01  -.8949145E-01  -.7534385E-01  -.5044531E-01  -.9958661E-02
   .4325644E-01   .9285938E-01   .1217946E+00   .1256596E+00   .1099158E+00
   .7906580E-01   .3555135E-01  -.1155760E-01  -.4681339E-01  -.6077663E-01
  -.5565244E-01  -.3734851E-01  -.1086283E-01   .1291207E-01   .1882709E-01
   .4247800E-02  -.1474964E-01  -.2190842E-01  -.1860175E-01  -.1597079E-01
  -.1723601E-01  -.1855312E-01  -.2174292E-01  -.3317530E-01  -.5044447E-01
  -.6175535E-01  -.5840389E-01  -.3852359E-01  -.3447739E-02   .3939829E-01
   .7437554E-01   .8610062E-01   .6969391E-01   .3531322E-01   .5230374E-02
  -.2034358E-02   .9467831E-02   .1754687E-01   .8612249E-02  -.7386288E-02
  -.1193396E-01  -.1336968E-02   .1259210E-01   .2259555E-01   .3362705E-01
   .4714654E-01   .5576916E-01   .6038893E-01   .7340068E-01   .9518267E-01
   .1038056E+00   .8038572E-01   .3486838E-01  -.6327469E-02  -.3344278E-01
  -.5904870E-01  -.9084903E-01  -.1169211E+00  -.1241021E+00  -.1150382E+00
  -.9879115E-01  -.7708092E-01  -.4774794E-01  -.1367400E-01   .1604428E-01
   .3011874E-01   .2325681E-01   .4281549E-02  -.1209348E-01  -.2434580E-01
  -.4177412E-01  -.6187060E-01  -.6851344E-01  -.5559021E-01  -.3308181E-01
  -.9396085E-02   .1304575E-01   .2866815E-01   .3366739E-01   .3610509E-01
   .4664359E-01   .6346415E-01   .7319130E-01   .6264804E-01   .3046374E-01
  -.7825781E-02  -.3150502E-01  -.3594927E-01  -.3485031E-01  -.3936717E-01
  -.4508625E-01  -.4297599E-01  -.3364743E-01  -.2383525E-01  -.1401399E-01
   .1706631E-02   .2380998E-01   .4390401E-01   .5605388E-01   .6376439E-01
   .7032272E-01   .6973899E-01   .5546055E-01   .3196693E-01   .7437743E-02
  -.1824930E-01  -.4504675E-01  -.5887002E-01  -.4422729E-01  -.1074403E-01
   .1201220E-01   .1123674E-01   .3987840E-02   .6792110E-02   .1271162E-01
   .9281387E-02   .9764161E-04  -.5246638E-02  -.8840819E-02  -.1911585E-01
  -.3575390E-01  -.4925843E-01  -.5224719E-01  -.4397949E-01  -.2533818E-01
   .3105234E-02   .3612706E-01   .6214117E-01   .7104511E-01   .6394968E-01
   .5104959E-01   .3694052E-01   .1448508E-01  -.1995695E-01  -.5473393E-01
  -.7666752E-01  -.8649365E-01  -.8943015E-01  -.8210995E-01  -.6179499E-01
  -.3733287E-01  -.1822756E-01  -.1284125E-02   .2300057E-01   .5509746E-01
   .8035049E-01   .7929289E-01   .4995818E-01   .1663235E-01   .4017533E-02
   .6761254E-02   .4475781E-03  -.1993303E-01  -.3151578E-01  -.1678825E-01
   .1178032E-01   .2901299E-01   .2761533E-01   .2135821E-01   .2227156E-01
   .2649279E-01   .2579538E-01   .2177643E-01   .1827001E-01   .8425306E-02
  -.1525765E-01  -.4372631E-01  -.6048971E-01  -.6287930E-01  -.5876843E-01
  -.4968848E-01  -.3339741E-01  -.1609383E-01  -.4400773E-02   .9554936E-02
   .3609354E-01   .6411747E-01   .6958717E-01   .5100868E-01   .3546547E-01
   .4032058E-01   .4821461E-01   .3500737E-01   .4795222E-02  -.2201334E-01
  -.4107680E-01  -.6063019E-01  -.7535669E-01  -.7112329E-01  -.5183965E-01
  -.3723769E-01  -.3437141E-01  -.2964423E-01  -.1107654E-01   .1365350E-01
   .2672164E-01   .2444049E-01   .2355181E-01   .3647486E-01   .5019969E-01
   .4575889E-01   .2993143E-01   .2465616E-01   .3221484E-01   .3900233E-01
   .4776612E-01   .7186409E-01   .9903302E-01   .9608757E-01   .5457313E-01
   .3694011E-02  -.2703751E-01  -.3656616E-01  -.3994852E-01  -.4451545E-01
  -.4659630E-01  -.4353594E-01  -.3989795E-01  -.4025509E-01  -.4261735E-01
  -.4478795E-01  -.4948862E-01  -.5684694E-01  -.5860536E-01  -.4726737E-01
  -.2577043E-01  -.3683541E-02   .9728104E-02   .8355775E-02  -.4728975E-02
  -.1552709E-01  -.1320579E-01  -.1286644E-02   .1301256E-01   .2878068E-01
   .4173672E-01   .4085984E-01   .2587055E-01   .1284333E-01   .1208822E-01
   .1616303E-01   .1863101E-01   .2673195E-01   .4529974E-01   .6334968E-01
   .6555850E-01   .4752161E-01   .1647610E-01  -.1722899E-01  -.4866838E-01
  -.7888200E-01  -.1053854E+00  -.1150747E+00  -.9387057E-01  -.4496865E-01
   .6893239E-02   .3420582E-01   .3076222E-01   .1424833E-01   .4650880E-02
   .4644748E-02   .5076191E-02   .1441681E-02  -.3554558E-02  -.7541147E-02
  -.1043463E-01  -.1091779E-01  -.6029967E-02   .5005115E-02   .1685784E-01
   .1947149E-01   .7656993E-02  -.1033175E-01  -.1841852E-01  -.9209260E-02
   .7867577E-02   .1651368E-01   .1043459E-01  -.1430361E-02  -.5348413E-02
   .4308820E-02   .2184327E-01   .3764816E-01   .4832796E-01   .5718608E-01
   .6367155E-01   .5927646E-01   .3991543E-01   .1465656E-01  -.7555196E-02
  -.3192843E-01  -.6550831E-01  -.9768026E-01  -.1094567E+00  -.9905796E-01
  -.8222212E-01  -.6788162E-01  -.4890169E-01  -.1900537E-01   .1468806E-01
   .4123010E-01   .5778706E-01   .6908974E-01   .8291646E-01   .1041756E+00
   .1246472E+00   .1226314E+00   .8604720E-01   .3192325E-01  -.1226786E-01
  -.4072941E-01  -.6402057E-01  -.7819442E-01  -.6383252E-01  -.1693128E-01
   .3941052E-01   .7738875E-01   .8784280E-01   .8312751E-01   .8221277E-01
   .8662354E-01   .7469877E-01   .3493595E-01  -.4559608E-02  -.7524048E-02
   .1785311E-01   .3020679E-01   .1436337E-01  -.4429056E-02  -.6206251E-02
  -.3196716E-02  -.1248080E-01  -.2744113E-01  -.3211807E-01  -.2948866E-01
  -.3721544E-01  -.5927993E-01  -.7870842E-01  -.8040821E-01  -.6858220E-01
  -.5588497E-01  -.4575966E-01  -.3226874E-01  -.1090775E-01   .1377178E-01
   .3050404E-01   .3532235E-01   .3983492E-01   .5285321E-01   .6188047E-01
   .5318700E-01   .3611215E-01   .2165282E-01  -.3063289E-02  -.4776294E-01
  -.8921659E-01  -.1009916E+00  -.9170670E-01  -.8332863E-01  -.7147479E-01
  -.3768256E-01   .1374927E-01   .5777088E-01   .7895717E-01   .8104711E-01
   .7108418E-01   .4869527E-01   .1225375E-01  -.2933148E-01  -.5460686E-01
  -.4617785E-01  -.1233030E-01   .1558431E-01   .1491210E-01  -.3117366E-02
  -.8816488E-02   .8407691E-02   .3135984E-01   .4335715E-01   .4633759E-01
   .4613451E-01   .4036242E-01   .2888198E-01   .1908249E-01   .1302678E-01
   .1940508E-02  -.2075950E-01  -.4736488E-01  -.6224403E-01  -.6015293E-01
  -.5349101E-01  -.5579744E-01  -.6129628E-01  -.5255380E-01  -.2688091E-01
   .1055949E-02   .2424039E-01   .5094188E-01   .8086593E-01   .9520246E-01
   .8348039E-01   .6174054E-01   .4829404E-01   .3878844E-01   .2354328E-01
   .9658277E-02   .3864059E-02  -.6517827E-02  -.3214256E-01  -.5848693E-01
  -.6590432E-01  -.5865626E-01  -.5373818E-01  -.5248099E-01  -.4374188E-01
  -.2742478E-01  -.1673253E-01  -.2043522E-01  -.3434168E-01  -.4702963E-01
  -.4854247E-01  -.3740317E-01  -.1995437E-01  -.1072355E-02   .1818444E-01
   .3217438E-01   .3345724E-01   .2691194E-01   .2577484E-01   .3041779E-01
   .2870879E-01   .1982813E-01   .1618529E-01   .1905177E-01   .1483789E-01
   .5878846E-03  -.8294809E-02  -.3473674E-02   .1564025E-02  -.9305665E-02
  -.3412416E-01  -.5853336E-01  -.7239136E-01  -.7428896E-01  -.6882797E-01
  -.6570753E-01  -.7149370E-01  -.7641321E-01  -.5903220E-01  -.1041753E-01
   .5262437E-01   .1012919E+00   .1158446E+00   .9385823E-01   .4881231E-01
   .5301550E-02  -.1383147E-01  -.3230290E-02   .2460990E-01   .5217384E-01
   .6297763E-01   .4261016E-01  -.6714681E-02  -.5441160E-01  -.6655692E-01
  -.4304327E-01  -.1273942E-01   .2723431E-02   .2044468E-02  -.9155801E-02
  -.2478723E-01  -.3839918E-01  -.5122615E-01  -.7035047E-01  -.8936944E-01
  -.8585634E-01  -.4827125E-01   .7803933E-02   .5681994E-01   .8382287E-01
   .8664863E-01   .7154581E-01   .5059104E-01   .3382799E-01   .1923777E-01
  -.2947288E-02  -.3307541E-01  -.5765120E-01  -.6689345E-01  -.6753016E-01
  -.6877967E-01  -.6535288E-01  -.4618925E-01  -.1219204E-01   .2477150E-01
   .5337051E-01   .6533362E-01   .5677872E-01   .3745556E-01   .2888039E-01
   .4075601E-01   .5596888E-01   .5158868E-01   .2906960E-01   .9941541E-02
   .3973900E-02  -.1674451E-02  -.1472749E-01  -.1776708E-01   .7220614E-02
   .4647793E-01   .6828494E-01   .6335056E-01   .5046217E-01   .4528007E-01
   .4521234E-01   .4495620E-01   .4502157E-01   .4153934E-01   .2552839E-01
  -.1380987E-02  -.2319855E-01  -.2826123E-01  -.2326903E-01  -.2182878E-01
  -.2410268E-01  -.1564214E-01   .1059852E-01   .3723471E-01   .3849594E-01
   .1202863E-01  -.1925841E-01  -.3933611E-01  -.5398121E-01  -.6708790E-01
  -.6365384E-01  -.3130250E-01   .1582283E-01   .5220292E-01   .7123885E-01
   .8352272E-01   .8971089E-01   .7430196E-01   .3114596E-01  -.1944752E-01
  -.5081635E-01  -.5934954E-01  -.6100001E-01  -.6370517E-01  -.5946729E-01
  -.4442164E-01  -.2975721E-01  -.2469421E-01  -.2295114E-01  -.1698630E-01
  -.1179343E-01  -.1202133E-01  -.8491293E-02   .9881990E-02   .4250619E-01
   .8396922E-01   .1295732E+00   .1658208E+00   .1718493E+00   .1397210E+00
   .8242923E-01   .1871754E-01  -.3877278E-01  -.8010096E-01  -.9702790E-01
  -.9044368E-01  -.7151784E-01  -.5211499E-01  -.3715286E-01  -.2612922E-01
  -.1710214E-01  -.7397516E-02   .6450852E-02   .2880559E-01   .6113116E-01
   .9267082E-01   .1004282E+00   .7001735E-01   .1444110E-01  -.4081053E-01
  -.8635579E-01  -.1251729E+00  -.1455950E+00  -.1236832E+00  -.6048033E-01
   .4515832E-02   .3234794E-01   .2570400E-01   .1578047E-01   .1713418E-01
   .1802734E-01   .1341161E-01   .1784259E-01   .3604801E-01   .4632641E-01
   .2945394E-01  -.3563980E-02  -.2917373E-01  -.4300845E-01  -.5772743E-01
  -.7693075E-01  -.8529179E-01  -.6707601E-01  -.2811086E-01   .5868930E-02
   .1239981E-01  -.8615178E-02  -.3914800E-01  -.6135280E-01  -.6815301E-01
  -.6217057E-01  -.4974720E-01  -.3455989E-01  -.1651820E-01   .2139085E-02
   .1492701E-01   .2252381E-01   .3826248E-01   .6803377E-01   .9265982E-01
   .8910196E-01   .6378602E-01   .4480022E-01   .4467809E-01   .5265624E-01
   .5924079E-01   .6341954E-01   .5827849E-01   .3555793E-01   .3160251E-02
  -.2243839E-01  -.3528685E-01  -.3844993E-01  -.3601579E-01  -.3509322E-01
  -.4024621E-01  -.4199284E-01  -.2876885E-01  -.1010879E-01  -.7204432E-02
  -.2210594E-01  -.3680810E-01  -.3979176E-01  -.3372937E-01  -.2040397E-01
   .6211328E-03   .1977505E-01   .2428267E-01   .1841305E-01   .1914163E-01
   .3070248E-01   .4046172E-01   .3875886E-01   .2790247E-01   .1514521E-01
   .6685092E-02   .4342815E-02   .7466980E-03  -.1687762E-01  -.5169692E-01
  -.8998367E-01  -.1118006E+00  -.1073748E+00  -.8344947E-01  -.5710061E-01
  -.4205843E-01  -.3697663E-01  -.2826985E-01  -.6762999E-02   .2182428E-01
   .4568177E-01   .6005537E-01   .6534298E-01   .5911095E-01   .3927930E-01
   .1060456E-01  -.1826365E-01  -.3883000E-01  -.4388091E-01  -.3458796E-01
  -.2505261E-01  -.2725493E-01  -.3453863E-01  -.3312659E-01  -.2518443E-01
  -.2431867E-01  -.3127137E-01  -.3186372E-01  -.2076428E-01  -.1023373E-01
  -.9591843E-02  -.1050570E-01  -.1842757E-02   .9797274E-02   .6101347E-02
  -.1685638E-01  -.3958932E-01  -.4147308E-01  -.2400588E-01  -.3735200E-02
   .1186530E-01   .2937436E-01   .5214839E-01   .7134531E-01   .7875690E-01
   .7839507E-01   .7970096E-01   .8598526E-01   .9393270E-01   .9955635E-01
   .9788204E-01   .8096280E-01   .4550233E-01   .2398594E-02  -.2905039E-01
  -.3840852E-01  -.3152406E-01  -.2120051E-01  -.1454161E-01  -.9643783E-02
  -.1965070E-02   .7405961E-02   .1025662E-01   .4174726E-03  -.1556870E-01
  -.2289700E-01  -.1749450E-01  -.1196311E-01  -.1417956E-01  -.1143216E-01
   .1034372E-01   .4130276E-01   .5935422E-01   .6202758E-01   .6869222E-01
   .9078570E-01   .1143697E+00   .1172839E+00   .9605470E-01   .6991807E-01
   .5892132E-01   .6088464E-01   .5768107E-01   .4614586E-01   .4604163E-01
   .6565952E-01   .7947293E-01   .6135648E-01   .2258368E-01  -.7090111E-02
  -.2124091E-01  -.3362092E-01  -.4626004E-01  -.4776489E-01  -.3412115E-01
  -.1018304E-01   .2084640E-01   .5200205E-01   .6748175E-01   .6026556E-01
   .4604796E-01   .4461091E-01   .5357204E-01   .5369172E-01   .3595994E-01
   .1028287E-01  -.1234643E-01  -.3416279E-01  -.6231849E-01  -.9382965E-01
  -.1150536E+00  -.1154602E+00  -.9814381E-01  -.7536259E-01  -.5749034E-01
  -.4724486E-01  -.4099470E-01  -.3490841E-01  -.3079016E-01  -.3337435E-01
  -.4011883E-01  -.3908711E-01  -.2302440E-01  -.2244951E-02   .4273720E-02
  -.9152334E-02  -.2919930E-01  -.4186680E-01  -.4710761E-01  -.5081296E-01
  -.5301449E-01  -.5157277E-01  -.5014790E-01  -.5373100E-01  -.5980639E-01
  -.5991357E-01  -.4909014E-01  -.3169376E-01  -.1756545E-01  -.1280674E-01
  -.1662161E-01  -.2615935E-01  -.3888006E-01  -.5003667E-01  -.5288837E-01
  -.4427062E-01  -.2784384E-01  -.9796572E-02   .6926259E-02   .2252066E-01
   .3695678E-01   .4968920E-01   .6101965E-01   .6930353E-01   .6743624E-01
   .4717584E-01   .1019681E-01  -.2788129E-01  -.4952142E-01  -.5417618E-01
  -.6200297E-01  -.9261724E-01  -.1404241E+00  -.1760370E+00  -.1741904E+00
  -.1395259E+00  -.1038290E+00  -.9526786E-01  -.1092788E+00  -.1147429E+00
  -.9171443E-01  -.5340931E-01  -.2459519E-01  -.1078235E-01  -.6441411E-03
   .1156918E-01   .2213866E-01   .2947406E-01   .3246454E-01   .2256300E-01
  -.4516828E-02  -.3117689E-01  -.3035663E-01  -.5098532E-04   .2996925E-01
   .3381796E-01   .1869735E-01   .8112788E-02   .7301633E-02   .2369771E-02
  -.1269623E-01  -.2929933E-01  -.4329982E-01  -.5995311E-01  -.7596718E-01
  -.7589266E-01  -.5595326E-01  -.3371034E-01  -.2296949E-01  -.1443547E-01
   .6595899E-02   .3486049E-01   .5013148E-01   .4232934E-01   .2107566E-01
   .6454631E-03  -.1470201E-01  -.2782829E-01  -.4032759E-01  -.5149759E-01
  -.6144568E-01  -.7079477E-01  -.7739280E-01  -.7530180E-01  -.5816614E-01
  -.2577187E-01   .1306936E-01   .4670934E-01   .6849554E-01   .7624420E-01
   .6858479E-01   .4774394E-01   .2098799E-01  -.7046960E-02  -.3758960E-01
  -.6715669E-01  -.8284765E-01  -.7790254E-01  -.6265856E-01  -.4741108E-01
  -.2658387E-01   .4374311E-02   .3164062E-01   .4151772E-01   .4283820E-01
   .5263756E-01   .7083833E-01   .8390333E-01   .8419860E-01   .7454823E-01
   .6168556E-01   .5316474E-01   .5499303E-01   .6613256E-01   .7857748E-01
   .8650259E-01   .9169329E-01   .9838111E-01   .1069929E+00   .1143851E+00
   .1178265E+00   .1172172E+00   .1148581E+00   .1136594E+00   .1153322E+00
   .1201761E+00   .1274079E+00   .1333648E+00   .1308408E+00   .1146263E+00
   .8789004E-01   .6104099E-01   .4580416E-01   .5005710E-01   .7239731E-01
   .1006256E+00   .1209271E+00   .1293127E+00   .1304754E+00   .1279129E+00
   .1209077E+00   .1091802E+00   .9423558E-01   .7689411E-01   .5745082E-01
   .3760760E-01   .1989646E-01   .7207097E-02   .2486931E-02   .6327751E-02
   .1588349E-01   .2895772E-01   .4700502E-01   .7040184E-01   .9419190E-01
   .1137680E+00   .1316425E+00   .1510209E+00   .1646943E+00   .1592133E+00
   .1319649E+00   .9621638E-01   .6527351E-01   .3857709E-01   .1056300E-01
  -.1435451E-01  -.2722018E-01  -.2868653E-01  -.2662683E-01  -.2513685E-01
  -.2391144E-01  -.2224863E-01  -.1789430E-01  -.8169295E-02   .2945324E-02
   .5072119E-02  -.6833226E-02  -.2639302E-01  -.4375463E-01  -.5458409E-01
  -.5934602E-01  -.5873880E-01  -.5369328E-01  -.4781895E-01  -.4595538E-01
  -.4912202E-01  -.5259331E-01  -.4989828E-01  -.3967394E-01  -.2825666E-01
  -.2356511E-01  -.2693585E-01  -.3321815E-01  -.3906675E-01  -.4707905E-01
  -.6056353E-01  -.7842119E-01  -.9764148E-01  -.1169073E+00  -.1336498E+00
  -.1405878E+00  -.1320119E+00  -.1125921E+00  -.9330651E-01  -.7884424E-01
  -.6521712E-01  -.4931538E-01  -.3375747E-01  -.2147138E-01  -.1305566E-01
  -.1183192E-01  -.2413100E-01  -.5074750E-01  -.8278224E-01  -.1087920E+00
  -.1224921E+00  -.1221936E+00  -.1080725E+00  -.8259363E-01  -.5075714E-01
  -.1854089E-01   .6768506E-02   .1614317E-01   .4035263E-02  -.2557539E-01
  -.6123916E-01  -.9209533E-01  -.1129027E+00  -.1228855E+00  -.1229877E+00
  -.1143045E+00  -.9728275E-01  -.7261049E-01  -.4265231E-01  -.1073286E-01
   .1981736E-01   .4445691E-01   .5717288E-01   .5503427E-01   .4290278E-01
   .2881915E-01   .1328915E-01  -.1057535E-01  -.4348498E-01  -.7411004E-01
  -.9247782E-01  -.1028199E+00  -.1155177E+00  -.1302675E+00  -.1356154E+00
  -.1239578E+00  -.9945702E-01  -.7129005E-01  -.4523857E-01  -.2332432E-01
  -.7915525E-02  -.3095626E-02  -.1021974E-01  -.2441496E-01  -.3998384E-01
  -.5528554E-01  -.6711806E-01  -.6674080E-01  -.4974458E-01  -.2323308E-01
   .5534002E-02   .4003882E-01   .8243444E-01   .1193481E+00   .1346964E+00
   .1301407E+00   .1178897E+00   .9886726E-01   .6580309E-01   .2425332E-01
  -.7803810E-02  -.2161231E-01  -.2643435E-01  -.3491107E-01  -.4710553E-01
  -.5165539E-01  -.4048054E-01  -.2006515E-01  -.5330113E-02  -.2230899E-02
  -.2472251E-02   .2625349E-02   .1061913E-01   .1344131E-01   .8273281E-02
  -.1143579E-02  -.1084792E-01  -.1986854E-01  -.2819521E-01  -.3470190E-01
  -.3701754E-01  -.3213169E-01  -.1867076E-01   .9391283E-03   .2222599E-01
   .4298125E-01   .6303617E-01   .7976670E-01   .8721618E-01   .8152780E-01
   .6612297E-01   .4961815E-01   .3792421E-01   .3066560E-01   .2624355E-01
   .2513273E-01   .2586511E-01   .2410173E-01   .1845222E-01   .1176449E-01
   .5523594E-02  -.1390325E-02  -.9023170E-02  -.1701047E-01  -.2756639E-01
  -.4085140E-01  -.4859750E-01  -.3988211E-01  -.1455381E-01   .1622934E-01
   .4292078E-01   .6389331E-01   .7853772E-01   .8394405E-01   .8097555E-01
   .7486645E-01   .6822911E-01   .6134727E-01   .5869611E-01   .6515438E-01
   .7571342E-01   .7784837E-01   .6548896E-01   .4533774E-01   .2849113E-01
   .1974467E-01   .1694804E-01   .1754473E-01   .2132499E-01   .2775582E-01
   .3636579E-01   .4996953E-01   .7160268E-01   .9673183E-01   .1136330E+00
   .1138664E+00   .9910536E-01   .7730683E-01   .5555658E-01   .3727101E-01
   .2295581E-01   .1179617E-01   .4152655E-02   .1635020E-02   .3475221E-02
   .6157166E-02   .8303919E-02   .1241593E-01   .1890172E-01   .2269563E-01
   .1876126E-01   .7837997E-02  -.5322840E-02  -.1557064E-01  -.1843142E-01
  -.1236022E-01  -.2356310E-02   .3833651E-02   .4740050E-02   .6138895E-02
   .1238110E-01   .2072338E-01   .2469788E-01   .2021296E-01   .7347944E-02
  -.1170167E-01  -.3347031E-01  -.5275754E-01  -.6380829E-01  -.6389331E-01
  -.5685297E-01  -.5167305E-01  -.5531462E-01  -.6655015E-01  -.7762749E-01
  -.8296397E-01  -.8216931E-01  -.7411626E-01  -.5606372E-01  -.3191652E-01
  -.1344328E-01  -.7390377E-02  -.6273690E-02   .2827986E-02   .2293610E-01
   .4458199E-01   .5654765E-01   .5479819E-01   .4270604E-01   .2750612E-01
   .1603693E-01   .1014157E-01   .5879046E-02  -.1587195E-02  -.1227133E-01
  -.2025431E-01  -.1801777E-01  -.2897442E-02   .2062348E-01   .4483768E-01
   .6448407E-01   .7897128E-01   .8953276E-01   .9486126E-01   .9174970E-01
   .8086883E-01   .6918463E-01   .6539894E-01   .7453301E-01   .9595265E-01
   .1232793E+00   .1472575E+00   .1621464E+00   .1682108E+00   .1668665E+00
   .1572412E+00   .1396751E+00   .1171805E+00   .9074829E-01   .5864477E-01
   .2340598E-01  -.6750068E-02  -.2705347E-01  -.4013737E-01  -.4794881E-01
  -.4688243E-01  -.3498487E-01  -.1788897E-01  -.3330101E-02   .6683984E-02
   .1462761E-01   .2195408E-01   .2942099E-01   .3899975E-01   .5010884E-01
   .5690796E-01   .5578179E-01   .5351710E-01   .6105258E-01   .7844867E-01
   .9310529E-01   .9712554E-01   .9997188E-01   .1143975E+00   .1358115E+00
   .1483578E+00   .1468179E+00   .1388059E+00   .1290907E+00   .1147470E+00
   .9480178E-01   .7439392E-01   .5738972E-01   .4034922E-01   .1669132E-01
  -.1349337E-01  -.4131754E-01  -.6090196E-01  -.7596948E-01  -.8876022E-01
  -.9167380E-01  -.7750384E-01  -.4973037E-01  -.1512437E-01   .2521298E-01
   .7013232E-01   .1112587E+00   .1401769E+00   .1572767E+00   .1658336E+00
   .1617153E+00   .1368352E+00   .9132393E-01   .3715314E-01  -.9445268E-02
  -.3703940E-01  -.4295429E-01  -.3143993E-01  -.8463591E-02   .2067935E-01
   .4890631E-01   .6699562E-01   .7112119E-01   .6826440E-01   .6734366E-01
   .6547039E-01   .5054129E-01   .1896978E-01  -.1595546E-01  -.3813763E-01
  -.4627497E-01  -.5084201E-01  -.5805609E-01  -.6512292E-01  -.6958763E-01
  -.7369923E-01  -.7768948E-01  -.7673652E-01  -.6822326E-01  -.5650852E-01
  -.4694188E-01  -.3766982E-01  -.2170446E-01   .2512466E-02   .2780763E-01
   .4622260E-01   .5615384E-01   .6132102E-01   .6649391E-01   .7467299E-01
   .8524248E-01   .9304262E-01   .9181988E-01   .8052569E-01   .6512434E-01
   .5317614E-01   .4747479E-01   .4477155E-01   .3930276E-01   .2748344E-01
   .9373032E-02  -.1414764E-01  -.4405131E-01  -.8164792E-01  -.1253779E+00
  -.1699885E+00  -.2070509E+00  -.2256640E+00  -.2180960E+00  -.1887327E+00
  -.1524900E+00  -.1208450E+00  -.9295574E-01  -.6258541E-01  -.2951889E-01
  -.2376791E-02   .6551756E-02  -.8995038E-02  -.3976323E-01  -.6403653E-01
  -.6640727E-01  -.5204237E-01  -.3782960E-01  -.3389564E-01  -.3884495E-01
  -.4799153E-01  -.5881809E-01  -.7032790E-01  -.8320279E-01  -.9991431E-01
  -.1205287E+00  -.1392642E+00  -.1494314E+00  -.1513672E+00  -.1512907E+00
  -.1534734E+00  -.1576412E+00  -.1638422E+00  -.1742972E+00  -.1891829E+00
  -.2058215E+00  -.2247634E+00  -.2493895E+00  -.2744673E+00  -.2807423E+00
  -.2485811E+00  -.1778174E+00  -.8978645E-01  -.9071780E-02   .5265726E-01
   .9442155E-01   .1146077E+00   .1091259E+00   .7936569E-01   .3520860E-01
  -.1174884E-01  -.5417649E-01  -.8775907E-01  -.1093995E+00  -.1203845E+00
  -.1277100E+00  -.1373684E+00  -.1471810E+00  -.1477706E+00  -.1294809E+00
  -.8941150E-01  -.3623593E-01   .1256129E-01   .4321433E-01   .5509586E-01
   .5462139E-01   .4415175E-01   .2263599E-01  -.7165876E-02  -.3779496E-01
  -.6235752E-01  -.7647663E-01  -.7710666E-01  -.6493607E-01  -.4650576E-01
  -.2796085E-01  -.6798502E-02   .2383072E-01   .6197423E-01   .9438781E-01
   .1086124E+00   .1035482E+00   .8766462E-01   .7128288E-01   .6079801E-01
   .5782979E-01   .6294972E-01   .7675353E-01   .9525365E-01   .1090117E+00
   .1112264E+00   .1033216E+00   .8961344E-01   .7073897E-01   .4606781E-01
   .1880292E-01  -.6257931E-02  -.2930222E-01  -.5490184E-01  -.8399748E-01
  -.1102408E+00  -.1240347E+00  -.1159952E+00  -.7793274E-01  -.9975753E-02
   .6946886E-01   .1308833E+00   .1590207E+00   .1652353E+00   .1659958E+00
   .1573172E+00   .1242996E+00   .6980223E-01   .1742372E-01  -.1363251E-01
  -.2376636E-01  -.2327612E-01  -.2021507E-01  -.1901799E-01  -.2052746E-01
  -.2066070E-01  -.1512028E-01  -.6321048E-02   .3627494E-03   .5140097E-02
   .1162920E-01   .1911863E-01   .2244798E-01   .1846416E-01   .1264436E-01
   .1643701E-01   .3327200E-01   .5224733E-01   .6154273E-01   .6291415E-01
   .6773545E-01   .8173959E-01   .9730623E-01   .1010441E+00   .8828962E-01
   .6786011E-01   .5008400E-01   .3644561E-01   .2585897E-01   .2292580E-01
   .2996990E-01   .3711936E-01   .3374178E-01   .2427256E-01   .2142776E-01
   .2784411E-01   .3458477E-01   .3476066E-01   .2928912E-01   .2023591E-01
   .7111616E-02  -.9280670E-02  -.2596305E-01  -.4300601E-01  -.6469551E-01
  -.9219017E-01  -.1186724E+00  -.1350697E+00  -.1382128E+00  -.1304721E+00
  -.1133702E+00  -.8657026E-01  -.5333459E-01  -.2249757E-01  -.3295138E-02
   .1388920E-02  -.2769867E-02  -.7003449E-02  -.9651462E-02  -.1890176E-01
  -.4175475E-01  -.7273978E-01  -.9807681E-01  -.1088174E+00  -.1067839E+00
  -.9941521E-01  -.9207328E-01  -.8372731E-01  -.6745937E-01  -.3647355E-01
   .7175097E-02   .5176642E-01   .8597748E-01   .1069876E+00   .1173751E+00
   .1176609E+00   .1055258E+00   .8111005E-01   .4906621E-01   .1467254E-01
  -.1851121E-01  -.4702632E-01  -.6648518E-01  -.7241900E-01  -.6227045E-01
  -.3751635E-01  -.3205755E-02   .3466413E-01   .6993572E-01   .9711604E-01
   .1149749E+00   .1275227E+00   .1374942E+00   .1402864E+00   .1288133E+00
   .1034627E+00   .7369547E-01   .4978970E-01   .3558657E-01   .3016979E-01
   .3131807E-01   .3525391E-01   .3733504E-01   .3633979E-01   .3667951E-01
   .4406466E-01   .5977241E-01   .8018669E-01   .9977476E-01   .1139226E+00
   .1228263E+00   .1336517E+00   .1539924E+00   .1797171E+00   .1941063E+00
   .1834940E+00   .1511093E+00   .1125732E+00   .8099628E-01   .6128096E-01
   .5447625E-01   .5932550E-01   .6987616E-01   .7698287E-01   .7399729E-01
   .5991358E-01   .3808023E-01   .1260533E-01  -.1483549E-01  -.4502581E-01
  -.7737302E-01  -.1066293E+00  -.1254219E+00  -.1299677E+00  -.1223891E+00
  -.1084317E+00  -.9475339E-01  -.8475917E-01  -.7418751E-01  -.5419779E-01
  -.2251666E-01   .1007306E-01   .2897173E-01   .3056309E-01   .2430051E-01
   .2118068E-01   .2487161E-01   .3430362E-01   .4784160E-01   .6091512E-01
   .6436864E-01   .5134216E-01   .2446379E-01  -.6381005E-02  -.3290248E-01
  -.5365668E-01  -.7064257E-01  -.8284584E-01  -.8549299E-01  -.7652899E-01
  -.6067828E-01  -.4427535E-01  -.2913282E-01  -.1406088E-01  -.7058172E-04
   .9518213E-02   .1310788E-01   .1236441E-01   .1000065E-01   .8239679E-02
   .8454339E-02   .9583596E-02   .7696657E-02  -.2995710E-03  -.1286941E-01
  -.2638237E-01  -.4082158E-01  -.5985344E-01  -.8487654E-01  -.1113234E+00
  -.1317684E+00  -.1424594E+00  -.1455711E+00  -.1445276E+00  -.1384871E+00
  -.1229381E+00  -.9589280E-01  -.6204507E-01  -.2967160E-01  -.4436658E-02
   .1267796E-01   .2218128E-01   .2482337E-01   .2310272E-01   .1955876E-01
   .1227623E-01  -.5034893E-02  -.3541343E-01  -.7372319E-01  -.1118167E+00
  -.1454294E+00  -.1731557E+00  -.1917406E+00  -.1969337E+00  -.1867168E+00
  -.1610033E+00  -.1220077E+00  -.7736028E-01  -.3785192E-01  -.1113373E-01
  -.9789606E-03  -.8467707E-02  -.2719952E-01  -.4417008E-01  -.5484069E-01
  -.6904907E-01  -.9247969E-01  -.1127657E+00  -.1152011E+00  -.1036597E+00
  -.9413937E-01  -.9234700E-01  -.9100885E-01  -.8736438E-01  -.8858904E-01
  -.9727987E-01  -.1032403E+00  -.9609442E-01  -.7897523E-01  -.6335150E-01
  -.5536145E-01  -.5330486E-01  -.5452930E-01  -.5814114E-01  -.6201037E-01
  -.6234593E-01  -.5820346E-01  -.5409742E-01  -.5701087E-01  -.7042102E-01
  -.8953912E-01  -.1025713E+00  -.9937664E-01  -.7892690E-01  -.4756870E-01
  -.1209126E-01   .2509475E-01   .6531088E-01   .1080849E+00   .1454528E+00
   .1634941E+00   .1519264E+00   .1127629E+00   .5947457E-01   .9051041E-02
  -.2768251E-01  -.5169362E-01  -.7092996E-01  -.8817672E-01  -.9583841E-01
  -.8479962E-01  -.5560712E-01  -.1977813E-01   .7490695E-02   .1575074E-01
   .5115263E-02  -.1393385E-01  -.2888119E-01  -.3495206E-01  -.3654238E-01
  -.4010146E-01  -.4766676E-01  -.5667573E-01  -.6229580E-01  -.5967499E-01
  -.4725645E-01  -.2965363E-01  -.1469853E-01  -.5824298E-02  -.3334986E-03
   .5148194E-02   .1142110E-01   .1878432E-01   .2592921E-01   .2517862E-01
   .6825630E-02  -.2848348E-01  -.6669104E-01  -.9173590E-01  -.9746629E-01
  -.8751524E-01  -.6793947E-01  -.4411728E-01  -.2197293E-01  -.5849075E-02
   .5645190E-02   .1652515E-01   .2525374E-01   .2537371E-01   .1531671E-01
   .3516979E-02   .9989266E-03   .1021343E-01   .2186101E-01   .2342610E-01
   .1313223E-01   .2652397E-02   .1613629E-02   .3222256E-02  -.7648760E-02
  -.3499437E-01  -.6848980E-01  -.9685932E-01  -.1153373E+00  -.1219520E+00
  -.1173354E+00  -.1099482E+00  -.1124313E+00  -.1297211E+00  -.1544081E+00
  -.1734981E+00  -.1765372E+00  -.1592929E+00  -.1249904E+00  -.8448665E-01
  -.5346395E-01  -.4364700E-01  -.5380824E-01  -.7180582E-01  -.8728433E-01
  -.9821545E-01  -.1047611E+00  -.1047285E+00  -.9728837E-01  -.8312104E-01
  -.5860960E-01  -.2140271E-01   .1569402E-01   .3097396E-01   .1902623E-01
  -.4376233E-02  -.2651869E-01  -.4989169E-01  -.7583911E-01  -.9480015E-01
  -.1012535E+00  -.1038193E+00  -.1116024E+00  -.1212880E+00  -.1261697E+00
  -.1278960E+00  -.1290881E+00  -.1208094E+00  -.8937971E-01  -.3426647E-01
   .2814529E-01   .7795236E-01   .1047765E+00   .1103153E+00   .1027482E+00
   .8828221E-01   .6712483E-01   .3781618E-01   .3166672E-02  -.2892543E-01
  -.4822186E-01  -.4527859E-01  -.1567125E-01   .3431321E-01   .8668686E-01
   .1220363E+00   .1349252E+00   .1354993E+00   .1326475E+00   .1217516E+00
   .9510915E-01   .5895961E-01   .3144277E-01   .2622475E-01   .4269851E-01
   .6868218E-01   .8853945E-01   .9182987E-01   .7788166E-01   .5286141E-01
   .2361213E-01  -.4294080E-02  -.2524779E-01  -.3497744E-01  -.3280158E-01
  -.1969148E-01   .5529212E-02   .4402175E-01   .8976988E-01   .1279441E+00
   .1436722E+00   .1328255E+00   .1028280E+00   .6447527E-01   .2592617E-01
  -.5400930E-02  -.2039281E-01  -.1332898E-01   .1115340E-01   .4035334E-01
   .6390183E-01   .7994505E-01   .9124452E-01   .9816531E-01   .9643250E-01
   .8192719E-01   .5770246E-01   .3391769E-01   .2077018E-01   .2308894E-01
   .4013412E-01   .6570344E-01   .8927106E-01   .1029993E+00   .1065575E+00
   .1022881E+00   .9127005E-01   .7809968E-01   .7247203E-01   .7884924E-01
   .8923102E-01   .9140924E-01   .8083309E-01   .6139994E-01   .3890360E-01
   .1845835E-01   .6687229E-02   .1056408E-01   .3231387E-01   .6814482E-01
   .1118441E+00   .1548747E+00   .1857056E+00   .1980479E+00   .1987594E+00
   .1969467E+00   .1876286E+00   .1602832E+00   .1197860E+00   .8137991E-01
   .4852810E-01   .1443165E-01  -.1578956E-01  -.2353041E-01  -.1969240E-02
   .3034337E-01   .4612113E-01   .3276288E-01  -.5385132E-03  -.3202992E-01
  -.4282489E-01  -.2668191E-01   .1026731E-01   .5303582E-01   .8270832E-01
   .8880674E-01   .7961397E-01   .7119122E-01   .6634085E-01   .5301969E-01
   .2241813E-01  -.1965612E-01  -.5961628E-01  -.8612719E-01  -.9336190E-01
  -.8276293E-01  -.6290870E-01  -.4138197E-01  -.1618572E-01   .1962638E-01
   .6497143E-01   .1079302E+00   .1350041E+00   .1375558E+00   .1129894E+00
   .6815292E-01   .1996412E-01  -.1390503E-01  -.2554343E-01  -.1977505E-01
  -.1209283E-01  -.2042787E-01  -.4959674E-01  -.8538115E-01  -.1084957E+00
  -.1096039E+00  -.8767924E-01  -.4271947E-01   .1770406E-01   .6884958E-01
   .8266979E-01   .5718498E-01   .2077165E-01   .1538726E-02   .5405476E-03
  -.1507663E-02  -.1984253E-01  -.5189281E-01  -.8007855E-01  -.8426302E-01
  -.5721998E-01  -.1160075E-01   .2884819E-01   .4581352E-01   .3910240E-01
   .2661850E-01   .2831668E-01   .4603065E-01   .6145215E-01   .5667978E-01
   .3376347E-01   .1160108E-01   .6181067E-02   .1673680E-01   .3055356E-01
   .3592489E-01   .2896726E-01   .1366301E-01   .1111367E-03  -.1330615E-02
   .1165214E-01   .3126581E-01   .4768926E-01   .5836860E-01   .6657497E-01
   .7114188E-01   .6405496E-01   .4157140E-01   .1337073E-01  -.4462479E-02
  -.4849031E-02   .6807799E-02   .2242280E-01   .3638566E-01   .4270747E-01
   .3832058E-01   .3057508E-01   .3160597E-01   .4368578E-01   .5805311E-01
   .6763184E-01   .7006834E-01   .5931910E-01   .3006079E-01  -.6538942E-02
  -.2618142E-01  -.1603511E-01   .1555850E-01   .5548311E-01   .9842972E-01
   .1410079E+00   .1760291E+00   .1968271E+00   .2013290E+00   .1907344E+00
   .1686925E+00   .1424828E+00   .1200132E+00   .1034423E+00   .8913735E-01
   .7600611E-01   .7018425E-01   .7642840E-01   .8863732E-01   .9638809E-01
   .9771313E-01   .9512914E-01   .8409413E-01   .5858721E-01   .2548705E-01
   .1525919E-02  -.3995297E-02   .5839542E-02   .2459416E-01   .4610595E-01
   .6037331E-01   .5721914E-01   .3915526E-01   .2224073E-01   .1811796E-01
   .2167564E-01   .2127269E-01   .1575925E-01   .1532728E-01   .2850875E-01
   .5353088E-01   .8194635E-01   .1056473E+00   .1172900E+00   .1097247E+00
   .8269281E-01   .4858820E-01   .2294280E-01   .7443219E-02  -.9636345E-02
  -.3456970E-01  -.5878745E-01  -.7140361E-01  -.7283606E-01  -.7033459E-01
  -.6585803E-01  -.5600283E-01  -.4038785E-01  -.2201311E-01  -.7908856E-03
   .2500545E-01   .4917019E-01   .5918854E-01   .5050727E-01   .3075686E-01
   .8041134E-02  -.1615161E-01  -.3919346E-01  -.5253569E-01  -.5207598E-01
  -.4719509E-01  -.5133908E-01  -.6684149E-01  -.8422384E-01  -.9375378E-01
  -.9267043E-01  -.8404034E-01  -.7337328E-01  -.6417368E-01  -.5532946E-01
  -.4391338E-01  -.2816908E-01  -.5639004E-02   .2585704E-01   .6105581E-01
   .8606720E-01   .8897619E-01   .7001036E-01   .3979081E-01   .1019848E-01
  -.1368685E-01  -.3646803E-01  -.6635903E-01  -.1035069E+00  -.1355159E+00
  -.1461912E+00  -.1281561E+00  -.8678960E-01  -.3472796E-01   .1474118E-01
   .5046761E-01   .6542815E-01   .5940101E-01   .3804840E-01   .8232100E-02
  -.2483601E-01  -.5667364E-01  -.8175511E-01  -.9269527E-01  -.8439237E-01
  -.6291022E-01  -.4583932E-01  -.4538385E-01  -.5269259E-01  -.4740620E-01
  -.2219008E-01   .8600684E-02   .2435504E-01   .1552989E-01  -.1392956E-01
  -.5141038E-01  -.8043177E-01  -.9107706E-01  -.8967071E-01  -.8996792E-01
  -.9481634E-01  -.9659183E-01  -.9307379E-01  -.8846142E-01  -.8198291E-01
  -.6896821E-01  -.5081198E-01  -.3350220E-01  -.2088431E-01  -.1596791E-01
  -.2166936E-01  -.3473188E-01  -.4456888E-01  -.4233723E-01  -.2847040E-01
  -.1033648E-01   .4176389E-02   .1047725E-01   .7491814E-02  -.3332989E-02
  -.1959026E-01  -.4035213E-01  -.6583359E-01  -.9181254E-01  -.1066393E+00
  -.9956865E-01  -.7183699E-01  -.3520977E-01   .1273945E-02   .3779143E-01
   .7366341E-01   .9713604E-01   .9293469E-01   .5940198E-01   .1321054E-01
  -.2247933E-01  -.3302622E-01  -.2113804E-01  -.4546649E-02  -.1639216E-02
  -.1683620E-01  -.3972282E-01  -.5636670E-01  -.5903624E-01  -.4909283E-01
  -.3634886E-01  -.3433768E-01  -.4928663E-01  -.7186701E-01  -.8582173E-01
  -.8582192E-01  -.8164703E-01  -.8543351E-01  -.9883131E-01  -.1131375E+00
  -.1190009E+00  -.1134966E+00  -.9820374E-01  -.7274716E-01  -.3423660E-01
   .1335436E-01   .5198270E-01   .5999564E-01   .3309927E-01  -.9861297E-02
  -.4362793E-01  -.5457254E-01  -.4600256E-01  -.3473327E-01  -.3788259E-01
  -.5457097E-01  -.6577928E-01  -.5749864E-01  -.3628546E-01  -.1739259E-01
  -.6961372E-02  -.5862349E-03   .7685013E-02   .1749775E-01   .2224571E-01
   .1911640E-01   .1641812E-01   .2467019E-01   .4225355E-01   .5845642E-01
   .6885611E-01   .7714337E-01   .8262989E-01   .7769145E-01   .6051271E-01
   .4206083E-01   .3546959E-01   .4115017E-01   .4673718E-01   .4170836E-01
   .2797117E-01   .1541871E-01   .1192490E-01   .1809376E-01   .2881100E-01
   .3672662E-01   .3407881E-01   .1522059E-01  -.1907123E-01  -.5905932E-01
  -.9002215E-01  -.1016224E+00  -.9476463E-01  -.7827630E-01  -.5996130E-01
  -.4341679E-01  -.3068811E-01  -.2327502E-01  -.1950334E-01  -.1450805E-01
  -.7039511E-02  -.6063033E-02  -.2369938E-01  -.5810993E-01  -.9125389E-01
  -.1101834E+00  -.1205805E+00  -.1311682E+00  -.1373731E+00  -.1318770E+00
  -.1184718E+00  -.1021229E+00  -.7665122E-01  -.3690376E-01   .5397740E-02
   .3152423E-01   .3646968E-01   .2920012E-01   .1897598E-01   .1083213E-01
   .8837769E-02   .1536343E-01   .2684735E-01   .3369105E-01   .2632991E-01
   .3001306E-02  -.2644904E-01  -.4630766E-01  -.4999307E-01  -.5072317E-01
  -.6910180E-01  -.1049656E+00  -.1324530E+00  -.1314128E+00  -.1113049E+00
  -.9424542E-01  -.8776083E-01  -.8452007E-01  -.7681989E-01  -.5954025E-01
  -.2899373E-01   .7648372E-02   .2913190E-01   .2075774E-01  -.4097333E-02
  -.1588117E-01  -.1734779E-02   .2650051E-01   .5354579E-01   .7322939E-01
   .8016593E-01   .6713228E-01   .3666536E-01   .3572468E-02  -.1928145E-01
  -.3069802E-01  -.3593320E-01  -.4009838E-01  -.4686698E-01  -.5554712E-01
  -.5973040E-01  -.5560791E-01  -.4832505E-01  -.4350702E-01  -.3807046E-01
  -.2655358E-01  -.1235047E-01  -.4526377E-02  -.4749614E-02  -.5250028E-02
   .1207285E-03   .9324296E-02   .1789622E-01   .2477288E-01   .2933057E-01
   .2783525E-01   .1757732E-01   .3329410E-02  -.2579200E-02   .1160083E-01
   .4482473E-01   .7759784E-01   .8230857E-01   .4601321E-01  -.1498232E-01
  -.6636127E-01  -.8324687E-01  -.6567412E-01  -.3081422E-01   .9764358E-03
   .1287523E-01  -.7476776E-03  -.2535790E-01  -.3530775E-01  -.2045602E-01
   .1790126E-02   .6762117E-02  -.1104372E-01  -.3594603E-01  -.4780600E-01
  -.3696025E-01  -.1001531E-01   .1429846E-01   .1920108E-01   .3616986E-02
  -.1980338E-01  -.3943710E-01  -.5206140E-01  -.5677271E-01  -.5012731E-01
  -.3039547E-01  -.8952499E-03   .3305345E-01   .6598777E-01   .9214252E-01
   .1097988E+00   .1245261E+00   .1430088E+00   .1638337E+00   .1784016E+00
   .1804560E+00   .1705746E+00   .1515846E+00   .1237739E+00   .8654534E-01
   .4377070E-01   .5315779E-02  -.1863053E-01  -.2486026E-01  -.1780373E-01
  -.5097095E-02   .6192314E-02   .1203942E-01   .1325518E-01   .1410935E-01
   .1728473E-01   .2141141E-01   .2398295E-01   .2427663E-01   .2317965E-01
   .2200919E-01   .2124570E-01   .1829397E-01   .8009650E-02  -.1210378E-01
  -.3673809E-01  -.5338672E-01  -.4963612E-01  -.2228581E-01   .1979743E-01
   .6229144E-01   .9605997E-01   .1227585E+00   .1500882E+00   .1809179E+00
   .2056494E+00   .2063608E+00   .1729633E+00   .1163916E+00   .6140952E-01
   .2461740E-01   .2513431E-02  -.1769323E-01  -.4027001E-01  -.5689695E-01
  -.5667529E-01  -.3682352E-01  -.5349972E-02   .2418825E-01   .4110431E-01
   .4372487E-01   .3914666E-01   .3624906E-01   .3829333E-01   .4138843E-01
   .3896509E-01   .2790740E-01   .1078154E-01  -.7220857E-02  -.2255354E-01
  -.3347927E-01  -.3818814E-01  -.3556849E-01  -.2836827E-01  -.2267602E-01
  -.2072236E-01  -.1574215E-01   .7562638E-03   .2635515E-01   .4688241E-01
   .4975561E-01   .3496911E-01   .1170659E-01  -.1257663E-01  -.3649738E-01
  -.5933289E-01  -.7593169E-01  -.8004503E-01  -.7041465E-01  -.5089685E-01
  -.2603131E-01   .6503519E-03   .2515597E-01   .4319331E-01   .5234987E-01
   .5127907E-01   .3876977E-01   .1624820E-01  -.9706181E-02  -.2971152E-01
  -.3806583E-01  -.3620067E-01  -.2899118E-01  -.1918896E-01  -.7360345E-02
   .3647881E-02   .8010733E-02   .3847500E-02  -.1694213E-02   .9417912E-03
   .1334064E-01   .2964778E-01   .4545005E-01   .5923547E-01   .6571024E-01
   .5775273E-01   .3815172E-01   .1879544E-01   .4634187E-02  -.1166642E-01
  -.3598668E-01  -.6320296E-01  -.8484563E-01  -.9882908E-01  -.1070469E+00
  -.1083458E+00  -.9903649E-01  -.7829066E-01  -.5023687E-01  -.2259072E-01
  -.4182667E-02  -.4038946E-03  -.8248806E-02  -.1736200E-01  -.1736578E-01
  -.6942972E-02   .9621104E-03  -.1357990E-01  -.5678922E-01  -.1086648E+00
  -.1406645E+00  -.1455555E+00  -.1406245E+00  -.1417417E+00  -.1448415E+00
  -.1371777E+00  -.1160588E+00  -.8749834E-01  -.5572150E-01  -.2445627E-01
  -.2634758E-02   .2422466E-02  -.4652597E-02  -.1346776E-01  -.2127143E-01
  -.3246220E-01  -.4921186E-01  -.7081713E-01  -.9862521E-01  -.1316091E+00
  -.1590945E+00  -.1663074E+00  -.1472720E+00  -.1077601E+00  -.5882272E-01
  -.1239268E-01   .2076797E-01   .3572086E-01   .3687351E-01   .3295070E-01
   .2693464E-01   .1296930E-01  -.1603828E-01  -.5883638E-01  -.1032748E+00
  -.1337955E+00  -.1413755E+00  -.1276444E+00  -.1031026E+00  -.8000719E-01
  -.6117907E-01  -.3575214E-01   .7213381E-02   .5989600E-01   .9803489E-01
   .1061013E+00   .9250821E-01   .7347783E-01   .5015400E-01   .1302076E-01
  -.3575889E-01  -.7846370E-01  -.1003705E+00  -.1019786E+00  -.9217707E-01
  -.7745709E-01  -.5953063E-01  -.3868596E-01  -.1649196E-01   .3525773E-02
   .1842344E-01   .2904301E-01   .3827783E-01   .4671241E-01   .5131696E-01
   .4761495E-01   .3129786E-01   .1341152E-03  -.4198040E-01  -.8254149E-01
  -.1050124E+00  -.9938963E-01  -.7078671E-01  -.3488757E-01  -.7900572E-03
   .3540923E-01   .7413756E-01   .1003578E+00   .9971641E-01   .8037759E-01
   .6632419E-01   .6973450E-01   .7937065E-01   .7754971E-01   .6116775E-01
   .4348047E-01   .3955884E-01   .5200761E-01   .6990949E-01   .7970380E-01
   .7444400E-01   .5510868E-01   .3085230E-01   .1765846E-01   .2657017E-01
   .5107517E-01   .7348666E-01   .8418486E-01   .8787527E-01   .9113572E-01
   .9212589E-01   .8446554E-01   .6570185E-01   .4101403E-01   .2143140E-01
   .1840784E-01   .3684664E-01   .7052174E-01   .1040312E+00   .1212839E+00
   .1163029E+00   .9786770E-01   .8125608E-01   .7496088E-01   .7593003E-01
   .7618407E-01   .7172803E-01   .6526508E-01   .6333537E-01   .7210044E-01
   .9205269E-01   .1127671E+00   .1149711E+00   .8565932E-01   .3293203E-01
  -.1907579E-01  -.5080102E-01  -.5958973E-01  -.5386609E-01  -.4313198E-01
  -.3435981E-01  -.3150834E-01  -.3522131E-01  -.4171864E-01  -.4316443E-01
  -.3281680E-01  -.1079228E-01   .1607984E-01   .3848745E-01   .4851439E-01
   .4405507E-01   .3229657E-01   .2589822E-01   .3311230E-01   .5185896E-01
   .7509221E-01   .9872534E-01   .1197507E+00   .1317732E+00   .1301687E+00
   .1184488E+00   .1036282E+00   .8779507E-01   .6961010E-01   .5157105E-01
   .3888764E-01   .3103468E-01   .2047416E-01   .2606105E-02  -.1654007E-01
  -.2583971E-01  -.2125685E-01  -.1014259E-01  -.4156300E-02  -.8689514E-02
  -.1846228E-01  -.2187326E-01  -.9934185E-02   .1691890E-01   .4951969E-01
   .7630648E-01   .8902545E-01   .8526848E-01   .6974730E-01   .5294073E-01
   .4471885E-01   .4747394E-01   .5519402E-01   .5899176E-01   .5465106E-01
   .4668540E-01   .4493268E-01   .5479316E-01   .7022418E-01   .7908406E-01
   .7552701E-01   .6404985E-01   .5149568E-01   .3911732E-01   .2465920E-01
   .9449114E-02  -.8714423E-03  -.4038621E-02  -.4906254E-02  -.7728612E-02
  -.9976480E-02  -.7961796E-02  -.2809724E-02   .2988812E-02   .9912432E-02
   .1969053E-01   .3304467E-01   .4984022E-01   .6748160E-01   .7879337E-01
   .7539986E-01   .5481152E-01   .2334616E-01  -.8212339E-02  -.3223849E-01
  -.4819075E-01  -.5806743E-01  -.6055128E-01  -.5375056E-01  -.4016515E-01
  -.2345264E-01  -.4778614E-02   .1194403E-01   .1832607E-01   .1208052E-01
   .2612166E-02  -.2423799E-02  -.8020470E-02  -.1996690E-01  -.3049541E-01
  -.2691712E-01  -.1045169E-01   .2986582E-02   .1060180E-02  -.1117158E-01
  -.1826940E-01  -.1341264E-01  -.6583766E-02  -.1237333E-01  -.3175933E-01
  -.4668922E-01  -.3508505E-01   .2553180E-02   .3533650E-01   .3402456E-01
   .8409892E-02  -.2151379E-02   .2486512E-01   .7116539E-01   .1031089E+00
   .1097685E+00   .1069823E+00   .1116446E+00   .1241163E+00   .1339172E+00
   .1328212E+00   .1206638E+00   .1044536E+00   .9381524E-01   .9346702E-01
   .9963269E-01   .1052922E+00   .1081018E+00   .1116090E+00   .1202554E+00
   .1354927E+00   .1544115E+00   .1698365E+00   .1735756E+00   .1619888E+00
   .1390925E+00   .1130964E+00   .8904276E-01   .6473562E-01   .3442083E-01
  -.2287375E-02  -.3767954E-01  -.6260980E-01  -.7332712E-01  -.7238471E-01
  -.6576071E-01  -.5923542E-01  -.5497569E-01  -.5120261E-01  -.4610591E-01
  -.4086651E-01  -.3682517E-01  -.3061761E-01  -.1698012E-01   .2063191E-02
   .1442692E-01   .8478424E-02  -.1421687E-01  -.3964482E-01  -.5484806E-01
  -.5899690E-01  -.6138514E-01  -.7100615E-01  -.8733205E-01  -.9939605E-01
  -.9525699E-01  -.7342560E-01  -.4531704E-01  -.2655982E-01  -.2596792E-01
  -.4201441E-01  -.6676101E-01  -.9108335E-01  -.1076392E+00  -.1122542E+00
  -.1045637E+00  -.8779970E-01  -.6626234E-01  -.4174903E-01  -.1419383E-01
   .1267719E-01   .2969814E-01   .3049816E-01   .1974052E-01   .8481299E-02
   .1966337E-02  -.4095217E-02  -.1502511E-01  -.2941489E-01  -.4091490E-01
  -.4385050E-01  -.3567649E-01  -.1700153E-01   .6928417E-02   .2663293E-01
   .3497529E-01   .3354730E-01   .2960789E-01   .2690937E-01   .2276871E-01
   .1551789E-01   .1151950E-01   .2050524E-01   .4440889E-01   .7420961E-01
   .9727300E-01   .1063319E+00   .1027338E+00   .9374151E-01   .8711329E-01
   .8491289E-01   .8211670E-01   .7308897E-01   .5882331E-01   .4504966E-01
   .3458363E-01   .2581996E-01   .1804071E-01   .1409539E-01   .1717338E-01
   .2767270E-01   .4293753E-01   .5677536E-01   .6148321E-01   .5424869E-01
   .4124806E-01   .3296479E-01   .3480681E-01   .4346908E-01   .5085403E-01
   .5009427E-01   .3935302E-01   .2330006E-01   .1090018E-01   .8436400E-02
   .1296895E-01   .1518327E-01   .1056623E-01   .5151603E-02   .8240382E-02
   .2222112E-01   .4149443E-01   .5860522E-01   .6974817E-01   .7670854E-01
   .8274442E-01   .8511438E-01   .7489244E-01   .4660601E-01   .7076531E-02
  -.2877476E-01  -.5040357E-01  -.5819777E-01  -.5977672E-01  -.6223046E-01
  -.6689409E-01  -.6793036E-01  -.5614100E-01  -.2862415E-01   .4064130E-02
   .2500218E-01   .2770290E-01   .2225199E-01   .2236744E-01   .2991425E-01
   .3562612E-01   .3254521E-01   .2320615E-01   .1275065E-01   .1111853E-02
  -.1302495E-01  -.2556090E-01  -.2974489E-01  -.2389450E-01  -.1347702E-01
  -.5964456E-02  -.4782391E-02  -.7942427E-02  -.1194157E-01  -.1541117E-01
  -.1837069E-01  -.2090599E-01  -.2384655E-01  -.2842790E-01  -.3385438E-01
  -.3671795E-01  -.3440058E-01  -.2691083E-01  -.1380145E-01   .7068179E-02
   .3474264E-01   .6178292E-01   .7915673E-01   .8350813E-01   .7870011E-01
   .7141145E-01   .6561132E-01   .5989786E-01   .4939097E-01   .3126561E-01
   .8679823E-02  -.1122730E-01  -.2376789E-01  -.2966331E-01  -.3059962E-01
  -.2438417E-01  -.8223751E-02   .1390224E-01   .3119943E-01   .3479513E-01
   .2586179E-01   .1456067E-01   .1040489E-01   .1277785E-01   .1152282E-01
  -.2478986E-02  -.2822686E-01  -.5646370E-01  -.7846420E-01  -.9128279E-01
  -.9527069E-01  -.9046613E-01  -.7878276E-01  -.6834745E-01  -.7015579E-01
  -.8674689E-01  -.1068152E+00  -.1147529E+00  -.1052685E+00  -.8735513E-01
  -.7438763E-01  -.7127944E-01  -.7078690E-01  -.6189150E-01  -.4117046E-01
  -.1611950E-01   .2254979E-02   .8914778E-02   .7541495E-02   .5373514E-02
   .6814259E-02   .1174912E-01   .1743206E-01   .2067040E-01   .1821967E-01
   .6898416E-02  -.1446685E-01  -.4299956E-01  -.7295026E-01  -.9873699E-01
  -.1169514E+00  -.1263668E+00  -.1262217E+00  -.1149633E+00  -.9167708E-01
  -.5953177E-01  -.2667154E-01  -.1126935E-02   .1568130E-01   .2749808E-01
   .3453751E-01   .3055448E-01   .1111280E-01  -.1831313E-01  -.4628356E-01
  -.6523331E-01  -.7364316E-01  -.7142917E-01  -.5919886E-01  -.4203525E-01
  -.2846540E-01  -.2319638E-01  -.2372432E-01  -.2459374E-01  -.2264022E-01
  -.1776995E-01  -.1162203E-01  -.7144199E-02  -.6804439E-02  -.1017148E-01
  -.1479110E-01  -.1814486E-01  -.1803403E-01  -.1238578E-01  -.1202076E-02
   .1173300E-01   .2108494E-01   .2374333E-01   .1987482E-01   .1095834E-01
  -.3638148E-03  -.9124718E-02  -.1019469E-01  -.2140255E-02   .1164760E-01
   .2489416E-01   .3020485E-01   .2193303E-01   .1434110E-02  -.2231364E-01
  -.3995232E-01  -.4984633E-01  -.5725644E-01  -.6516792E-01  -.6916068E-01
  -.6283923E-01  -.4514062E-01  -.1954784E-01   .1057077E-01   .4191371E-01
   .6890537E-01   .8521099E-01   .8790337E-01   .7846173E-01   .6006324E-01
   .3532634E-01   .6186519E-02  -.2598684E-01  -.5933032E-01  -.8956343E-01
  -.1103335E+00  -.1169117E+00  -.1101218E+00  -.9577230E-01  -.7937881E-01
  -.6264706E-01  -.4561727E-01  -.3091547E-01  -.2368294E-01  -.2619863E-01
  -.3436591E-01  -.4175170E-01  -.4656959E-01  -.5121340E-01  -.5702112E-01
  -.6485705E-01  -.7701564E-01  -.9116107E-01  -.9746058E-01  -.9018561E-01
  -.7621304E-01  -.6497227E-01  -.5696867E-01  -.4748656E-01  -.3533873E-01
  -.2324419E-01  -.1365317E-01  -.9102806E-02  -.1501110E-01  -.3622871E-01
  -.6811722E-01  -.9416411E-01  -.9760794E-01  -.7834573E-01  -.5769322E-01
  -.6415059E-01  -.1086952E+00  -.1704307E+00  -.2120861E+00  -.2136321E+00
  -.1852143E+00  -.1465389E+00  -.1055117E+00  -.6257787E-01  -.2417296E-01
  -.7282085E-03   .5344961E-02   .1868024E-02  -.2799429E-02  -.6420722E-02
  -.1147478E-01  -.2266018E-01  -.4377512E-01  -.7114683E-01  -.9114187E-01
  -.9091047E-01  -.7274392E-01  -.5265762E-01  -.4293855E-01  -.4054473E-01
  -.3562472E-01  -.2741476E-01  -.2585574E-01  -.3799598E-01  -.5802004E-01
  -.7176370E-01  -.6822405E-01  -.4828491E-01  -.2525510E-01  -.1522547E-01
  -.2222241E-01  -.3388198E-01  -.3507889E-01  -.2379707E-01  -.1227316E-01
  -.1394958E-01  -.2992168E-01  -.4828108E-01  -.5686086E-01  -.5480478E-01
  -.4901879E-01  -.4168637E-01  -.2754215E-01  -.4708712E-02   .1735593E-01
   .2407547E-01   .8038458E-02  -.2417401E-01  -.5495531E-01  -.6895541E-01
  -.6770423E-01  -.6732131E-01  -.7768199E-01  -.8789048E-01  -.8043092E-01
  -.5624067E-01  -.3512973E-01  -.3191763E-01  -.4069671E-01  -.4500869E-01
  -.3764458E-01  -.2512151E-01  -.1452326E-01  -.3872443E-02   .1181419E-01
   .3052225E-01   .4500062E-01   .5024583E-01   .4250126E-01   .1759171E-01
  -.2031611E-01  -.5430984E-01  -.6823029E-01  -.6140180E-01  -.4530535E-01
  -.3132577E-01  -.2558085E-01  -.2966381E-01  -.4058401E-01  -.4976273E-01
  -.4794028E-01  -.3611049E-01  -.2930724E-01  -.4282941E-01  -.7275005E-01
  -.9644000E-01  -.9490136E-01  -.6936603E-01  -.3636854E-01  -.1268601E-01
  -.3779239E-02  -.2040032E-02   .3452969E-02   .1539714E-01   .2842911E-01
   .3783044E-01   .4249041E-01   .4128723E-01   .3451798E-01   .2916591E-01
   .3533492E-01   .5481941E-01   .7793709E-01   .9375074E-01   .9973422E-01
   .1004743E+00   .1015731E+00   .1051537E+00   .1085416E+00   .1073691E+00
   .9941919E-01   .8476596E-01   .6377435E-01   .3691114E-01   .7207915E-02
  -.1803315E-01  -.2988942E-01  -.2498112E-01  -.9162206E-02   .8374255E-02
   .2273249E-01   .3211583E-01   .3228552E-01   .1856266E-01  -.5724045E-02
  -.2754624E-01  -.3416394E-01  -.2371645E-01  -.4270747E-02   .1538719E-01
   .3143038E-01   .4303414E-01   .5018769E-01   .5539265E-01   .6300989E-01
   .7311188E-01   .7890241E-01   .7427148E-01   .6127194E-01   .4648606E-01
   .3394161E-01   .2500091E-01   .2131905E-01   .2275109E-01   .2425351E-01
   .1879660E-01   .3650548E-02  -.1553816E-01  -.2558892E-01  -.1335892E-01
   .2397613E-01   .7484497E-01   .1202893E+00   .1467009E+00   .1527748E+00
   .1469584E+00   .1394516E+00   .1347762E+00   .1303238E+00   .1221459E+00
   .1103153E+00   .9736163E-01   .8454302E-01   .7239131E-01   .6204719E-01
   .5261438E-01   .4008221E-01   .2244783E-01   .3820387E-02  -.9249986E-02
  -.1375705E-01  -.1108731E-01  -.3869150E-02   .6747544E-02   .2069706E-01
   .3717715E-01   .5343259E-01   .6498489E-01   .6840841E-01   .6357737E-01
   .5332906E-01   .4191737E-01   .3172576E-01   .2091346E-01   .6842311E-02
  -.6897999E-02  -.1084821E-01   .3866882E-03   .2106031E-01   .4022819E-01
   .5292866E-01   .6057212E-01   .6285456E-01   .5554558E-01   .3675919E-01
   .1128035E-01  -.1316209E-01  -.3121825E-01  -.4055085E-01  -.4124628E-01
  -.3670358E-01  -.3160749E-01  -.2615691E-01  -.1383193E-01   .1060063E-01
   .4048246E-01   .5967943E-01   .5811231E-01   .4137873E-01   .2293617E-01
   .1100338E-01   .6253774E-02   .7043436E-02   .1046648E-01   .1165659E-01
   .8979982E-02   .8921318E-02   .2018618E-01   .4192104E-01   .6215751E-01
   .7003313E-01   .6647228E-01   .5942647E-01   .5096131E-01   .3521417E-01
   .9945572E-02  -.1606606E-01  -.3019910E-01  -.2716609E-01  -.1116339E-01
   .9520012E-02   .2702628E-01   .3647063E-01   .3810422E-01   .3616287E-01
   .3395419E-01   .3060958E-01   .2353746E-01   .1336401E-01   .5364634E-02
   .4992512E-02   .1241216E-01   .2215858E-01   .2881198E-01   .3141155E-01
   .3251247E-01   .3610947E-01   .4578528E-01   .6157366E-01   .7767860E-01
   .8471682E-01   .7675167E-01   .5770520E-01   .3999716E-01   .3371651E-01
   .3678735E-01   .3832279E-01   .3142042E-01   .1909114E-01   .7727504E-02
  -.3612477E-03  -.5620409E-02  -.8042581E-02  -.8490839E-02  -.9675771E-02
  -.1220747E-01  -.1241413E-01  -.7756497E-02  -.8270708E-03   .6183605E-02
   .1502943E-01   .2451618E-01   .2720372E-01   .1982803E-01   .1106129E-01
   .1129628E-01   .1978561E-01   .2872779E-01   .3542015E-01   .4240919E-01
   .4840678E-01   .4719221E-01   .3563021E-01   .1755593E-01   .2283236E-03
  -.9602269E-02  -.7167174E-02   .8576984E-02   .3321437E-01   .5823544E-01
   .7625279E-01   .8528198E-01   .8670198E-01   .8135216E-01   .6952843E-01
   .5259458E-01   .3251204E-01   .1168952E-01  -.4912375E-02  -.1035794E-01
  -.1386751E-02   .1702855E-01   .3369673E-01   .3846201E-01   .2946501E-01
   .1443646E-01   .4804219E-02   .8380870E-02   .2421594E-01   .4212341E-01
   .5006130E-01   .4443179E-01   .3110741E-01   .1592061E-01   .1348031E-02
  -.7971000E-02  -.5828333E-02   .7350192E-02   .2331331E-01   .3455603E-01
   .3934839E-01   .3847774E-01   .3249816E-01   .2292890E-01   .1132972E-01
  -.4880541E-02  -.3146425E-01  -.6888756E-01  -.1073136E+00  -.1325312E+00
  -.1369024E+00  -.1242372E+00  -.1051122E+00  -.8728637E-01  -.6938118E-01
  -.4422948E-01  -.9526240E-02   .2635165E-01   .5131569E-01   .6119350E-01
   .6297636E-01   .6653553E-01   .7459885E-01   .8154451E-01   .8117217E-01
   .7498468E-01   .7270222E-01   .8403526E-01   .1091531E+00   .1371079E+00
   .1539895E+00   .1542628E+00   .1433704E+00   .1285387E+00   .1102271E+00
   .8675178E-01   .6315219E-01   .4727084E-01   .3943477E-01   .3321598E-01
   .2455565E-01   .1426525E-01   .4202788E-02  -.4160880E-02  -.9014145E-02
  -.9527157E-02  -.7744577E-02  -.7942014E-02  -.1342948E-01  -.2186719E-01
  -.2366940E-01  -.8868552E-02   .2125744E-01   .5086559E-01   .6065098E-01
   .4392697E-01   .1187047E-01  -.1760697E-01  -.3573524E-01  -.4725937E-01
  -.6006427E-01  -.7427694E-01  -.8332904E-01  -.8321170E-01  -.7740421E-01
  -.7180640E-01  -.6752648E-01  -.6039753E-01  -.4696484E-01  -.2910740E-01
  -.1247312E-01  -.2153336E-02   .2767288E-03  -.2482198E-02  -.6556766E-02
  -.1092272E-01  -.1718930E-01  -.2580892E-01  -.3476469E-01  -.4309556E-01
  -.5300460E-01  -.6617823E-01  -.7957406E-01  -.8661716E-01  -.8267856E-01
  -.6884471E-01  -.5057818E-01  -.3457191E-01  -.2529513E-01  -.2067835E-01
  -.1168164E-01   .9681451E-02   .4199206E-01   .7694932E-01   .1066772E+00
   .1253756E+00   .1295006E+00   .1209276E+00   .1072338E+00   .9482766E-01
   .8354222E-01   .6981176E-01   .5202612E-01   .2984648E-01   .1990755E-02
  -.2896885E-01  -.5114306E-01  -.5278121E-01  -.3812258E-01  -.2457589E-01
  -.2112421E-01  -.1964253E-01  -.1183464E-01  -.3167063E-02  -.3104902E-02
  -.1130526E-01  -.2093436E-01  -.2917382E-01  -.3807603E-01  -.5039310E-01
  -.7029136E-01  -.1023901E+00  -.1425005E+00  -.1733189E+00  -.1772500E+00
  -.1542029E+00  -.1229489E+00  -.1042773E+00  -.1035783E+00  -.1100142E+00
  -.1107185E+00  -.1031522E+00  -.9443867E-01  -.9208526E-01  -.9666883E-01
  -.1021666E+00  -.1014401E+00  -.9113744E-01  -.7273167E-01  -.5111055E-01
  -.3248873E-01  -.2020160E-01  -.1187276E-01  -.3233941E-02   .4873366E-02
   .6246303E-02  -.1953766E-02  -.1249377E-01  -.1415263E-01  -.4575459E-02
   .7197898E-02   .1186375E-01   .8789387E-02   .2301418E-02  -.4776075E-02
  -.1031964E-01  -.9970856E-02  -.9963810E-03   .1202073E-01   .1875395E-01
   .1087605E-01  -.1071847E-01  -.3519980E-01  -.4961186E-01  -.4953875E-01
  -.4192970E-01  -.3566219E-01  -.3100484E-01  -.2112824E-01  -.2956072E-02
   .1579471E-01   .2183466E-01   .8665664E-02  -.1606033E-01  -.3666202E-01
  -.4458766E-01  -.4540758E-01  -.4851742E-01  -.5344022E-01  -.5201974E-01
  -.4293107E-01  -.3485243E-01  -.3283429E-01  -.3044888E-01  -.2027464E-01
  -.4401624E-02   .9466217E-02   .1810574E-01   .2500343E-01   .3368416E-01
   .4218115E-01   .4512192E-01   .3976837E-01   .2946690E-01   .1984844E-01
   .1266602E-01   .5029875E-02  -.5297561E-02  -.1586935E-01  -.2247281E-01
  -.2467014E-01  -.2568730E-01  -.2699405E-01  -.2583967E-01  -.2030697E-01
  -.1338260E-01  -.7704863E-02   .5266658E-03   .1545501E-01   .3110609E-01
   .3627042E-01   .2993528E-01   .2182762E-01   .1711842E-01   .1234876E-01
   .6504735E-02   .3728295E-02   .3845413E-02   .1103840E-02  -.6188942E-02
  -.1428261E-01  -.2179280E-01  -.3001016E-01  -.3651482E-01  -.3531979E-01
  -.2356869E-01  -.5132382E-02   .1204805E-01   .1985341E-01   .1353659E-01
  -.4883582E-02  -.2713052E-01  -.4449585E-01  -.5428263E-01  -.5969238E-01
  -.6351053E-01  -.6378581E-01  -.5635938E-01  -.3989761E-01  -.1831358E-01
   .4863704E-03   .9324739E-02   .7390169E-02   .1142985E-02  -.2948792E-02
  -.4399722E-02  -.5850933E-02  -.8662574E-02  -.1390857E-01  -.2355203E-01
  -.3742776E-01  -.5096335E-01  -.5894648E-01  -.6148459E-01  -.6322892E-01
  -.6698808E-01  -.7210854E-01  -.7693131E-01  -.7877335E-01  -.7382621E-01
  -.6006922E-01  -.3989782E-01  -.1927301E-01  -.5242965E-02  -.2907848E-02
  -.1137769E-01  -.2238142E-01  -.2552260E-01  -.1693795E-01  -.2570361E-02
   .7622453E-02   .8219553E-02   .1454678E-02  -.5921995E-02  -.7810126E-02
  -.2880362E-02   .3661580E-02   .4661964E-02  -.1667176E-02  -.1169587E-01
  -.2152203E-01  -.2904934E-01  -.3428711E-01  -.4019787E-01  -.5049792E-01
  -.6506874E-01  -.7853118E-01  -.8257855E-01  -.7031641E-01  -.4158883E-01
  -.5569715E-02   .2405232E-01   .3866840E-01   .4019976E-01   .3729653E-01
   .3663666E-01   .3719625E-01   .3291647E-01   .2148181E-01   .8041677E-02
  -.5292993E-03  -.2077908E-02   .1956755E-02   .1018179E-01   .2041319E-01
   .2871710E-01   .3135274E-01   .2613346E-01   .1232829E-01  -.8014408E-02
  -.2887025E-01  -.4370681E-01  -.5073907E-01  -.5283029E-01  -.5261712E-01
  -.4969405E-01  -.4261944E-01  -.3262482E-01  -.2386851E-01  -.1988132E-01
  -.2084265E-01  -.2432394E-01  -.2783289E-01  -.2997602E-01  -.3002858E-01
  -.2765266E-01  -.2326831E-01  -.1826052E-01  -.1417298E-01  -.1119526E-01
  -.8725476E-02  -.7185643E-02  -.7754179E-02  -.1082566E-01  -.1541086E-01
  -.1834941E-01  -.1570423E-01  -.8928997E-02  -.5173812E-02  -.6559565E-02
  -.4801902E-02   .6762172E-02   .2119440E-01   .2539314E-01   .1568956E-01
  -.9157483E-03  -.1940627E-01  -.4219064E-01  -.7053661E-01  -.9749028E-01
  -.1131993E+00  -.1146966E+00  -.1069362E+00  -.9476841E-01  -.7795438E-01
  -.5466646E-01  -.2686146E-01  -.7021960E-03   .1722864E-01   .2271761E-01
   .1362223E-01  -.8301277E-02  -.3246982E-01  -.4290315E-01  -.3304738E-01
  -.1383540E-01  -.2434271E-02  -.6066802E-02  -.1832218E-01  -.2799422E-01
  -.2920324E-01  -.2343833E-01  -.1551402E-01  -.1065411E-01  -.1388112E-01
  -.2625183E-01  -.4014865E-01  -.4281196E-01  -.2828957E-01  -.4993358E-02
   .1043090E-01   .8190045E-02  -.5810212E-02  -.1761012E-01  -.2021722E-01
  -.1871326E-01  -.2223329E-01  -.3334081E-01  -.4505121E-01  -.4610702E-01
  -.2867794E-01   .5875950E-02   .4666730E-01   .7868592E-01   .9020894E-01
   .7818527E-01   .4925576E-01   .1671535E-01  -.6347205E-02  -.1632861E-01
  -.2057745E-01  -.2659332E-01  -.3142917E-01  -.2571777E-01  -.5941098E-02
   .2025428E-01   .4020744E-01   .4732051E-01   .4582435E-01   .4363820E-01
   .4236658E-01   .3828236E-01   .3064197E-01   .2322773E-01   .1890866E-01
   .1692125E-01   .1573110E-01   .1494025E-01   .1388518E-01   .1073779E-01
   .3652462E-02  -.7392510E-02  -.1983467E-01  -.2930828E-01  -.3167789E-01
  -.2578298E-01  -.1403311E-01   .1123813E-03   .1507012E-01   .3176419E-01
   .5061363E-01   .6775088E-01   .7597604E-01   .7085372E-01   .5526335E-01
   .3726166E-01   .2491837E-01   .2230618E-01   .2770020E-01   .3536053E-01
   .4055515E-01   .4347241E-01   .4829459E-01   .5866498E-01   .7376533E-01
   .8726734E-01   .9046751E-01   .7909767E-01   .5878879E-01   .4119003E-01
   .3308332E-01   .3062328E-01   .2564038E-01   .1582959E-01   .5653771E-02
  -.1088518E-02  -.6303980E-02  -.1365386E-01  -.2075719E-01  -.1836312E-01
   .6142422E-03   .3173997E-01   .6111131E-01   .7727063E-01   .8000446E-01
   .7850885E-01   .8094844E-01   .8453337E-01   .7859526E-01   .5913926E-01
   .3597995E-01   .2064833E-01   .1280944E-01   .4916153E-02  -.5368003E-02
  -.1498830E-01  -.2254133E-01  -.2758308E-01  -.2648617E-01  -.1634460E-01
  -.9207713E-03   .1299379E-01   .2342386E-01   .3365853E-01   .4581344E-01
   .5592216E-01   .5570217E-01   .4029518E-01   .1511185E-01  -.7754141E-02
  -.2034829E-01  -.2322565E-01  -.1895408E-01  -.7312470E-02   .9454260E-02
   .2258904E-01   .2543181E-01   .2298114E-01   .2526243E-01   .3310668E-01
   .3676367E-01   .2922484E-01   .1561334E-01   .6433509E-02   .4569474E-02
   .3413876E-02  -.2607221E-02  -.1125109E-01  -.1769958E-01  -.2132146E-01
  -.2424138E-01  -.2692282E-01  -.2845859E-01  -.2970907E-01  -.3355252E-01
  -.4203284E-01  -.5408518E-01  -.6542569E-01  -.7113362E-01  -.6910078E-01
  -.6074594E-01  -.4914914E-01  -.3858272E-01  -.3412811E-01  -.3788171E-01
  -.4495254E-01  -.4522705E-01  -.3195232E-01  -.9046762E-02   .1208407E-01
   .2390456E-01   .2929589E-01   .3572372E-01   .4514991E-01   .5254908E-01
   .5259737E-01   .4521043E-01   .3415146E-01   .2271187E-01   .1244392E-01
   .3937783E-02  -.2935099E-02  -.7490614E-02  -.7196905E-02  -.1121264E-02
   .5759888E-02   .6659092E-02   .1172120E-02  -.5219887E-02  -.8320048E-02
  -.8472620E-02  -.8775959E-02  -.1233458E-01  -.1974812E-01  -.2716459E-01
  -.2862340E-01  -.2201593E-01  -.1018851E-01   .3475033E-02   .1826252E-01
   .3458766E-01   .5126104E-01   .6548558E-01   .7488972E-01   .7858127E-01
   .7736167E-01   .7342784E-01   .6831782E-01   .6050152E-01   .4737460E-01
   .2962777E-01   .1181136E-01  -.1272796E-02  -.7872170E-02  -.9607446E-02
  -.9259952E-02  -.8443749E-02  -.7150168E-02  -.5430567E-02  -.4748275E-02
  -.6900814E-02  -.1148200E-01  -.1482257E-01  -.1262279E-01  -.5213219E-02
   .9982647E-03   .1622719E-03  -.6004719E-02  -.1067561E-01  -.9500863E-02
  -.2808669E-02   .6707963E-02   .1446287E-01   .1563103E-01   .1093276E-01
   .8120297E-02   .1247230E-01   .1836570E-01   .1739732E-01   .1372660E-01
   .2096662E-01   .4021144E-01   .5207410E-01   .3919480E-01   .7518177E-02
  -.2458111E-01  -.5075264E-01  -.7789075E-01  -.1064596E+00  -.1231392E+00
  -.1173946E+00  -.9672518E-01  -.7777105E-01  -.6717444E-01  -.5881498E-01
  -.4691285E-01  -.3346604E-01  -.2312919E-01  -.1818065E-01  -.1965918E-01
  -.2772327E-01  -.3976729E-01  -.5150878E-01  -.6007099E-01  -.6461095E-01
  -.6553904E-01  -.6467961E-01  -.6362280E-01  -.6107921E-01  -.5457423E-01
  -.4544306E-01  -.3787915E-01  -.3250073E-01  -.2559154E-01  -.1580266E-01
  -.8060676E-02  -.8243513E-02  -.1598057E-01  -.2473350E-01  -.2709974E-01
  -.1940633E-01  -.4477581E-02   .8701052E-02   .1130882E-01   .2946805E-02
  -.8242270E-02  -.1465950E-01  -.1652957E-01  -.1957856E-01  -.2714812E-01
  -.3702317E-01  -.4537440E-01  -.5093784E-01  -.5465236E-01  -.5699095E-01
  -.5681537E-01  -.5221544E-01  -.4212870E-01  -.2744106E-01  -.1063565E-01
   .5600530E-02   .1983924E-01   .3275811E-01   .4672110E-01   .6288941E-01
   .7772103E-01   .8344339E-01   .7496108E-01   .5584948E-01   .3524790E-01
   .1881702E-01   .4366362E-02  -.1400819E-01  -.3793516E-01  -.6043953E-01
  -.6955396E-01  -.5764518E-01  -.2819185E-01   .6130883E-02   .3211611E-01
   .4444480E-01   .4696783E-01   .4673736E-01   .4750204E-01   .4732288E-01
   .4099971E-01   .2529722E-01   .3073647E-02  -.1818096E-01  -.3289927E-01
  -.4150519E-01  -.4714932E-01  -.5054181E-01  -.4931769E-01  -.4145623E-01
  -.2797593E-01  -.1214737E-01   .2662129E-02   .1365393E-01   .1858082E-01
   .1604767E-01   .6620362E-02  -.6761173E-02  -.2102437E-01  -.3556162E-01
  -.5139676E-01  -.6746613E-01  -.7902253E-01  -.8000159E-01  -.6808369E-01
  -.4771027E-01  -.2810240E-01  -.1679035E-01  -.1417691E-01  -.1428403E-01
  -.9781728E-02   .1472984E-02   .1414748E-01   .2091117E-01   .1896683E-01
   .9845146E-02  -.3236851E-02  -.1499681E-01  -.1998878E-01  -.1812141E-01
  -.1498533E-01  -.1497098E-01  -.1681317E-01  -.1740862E-01  -.1601629E-01
  -.1093927E-01   .4107930E-02   .3270506E-01   .6433853E-01   .7942203E-01
   .6922335E-01   .4366899E-01   .1703381E-01  -.6278803E-02  -.2817318E-01
  -.4636213E-01  -.5403865E-01  -.4704770E-01  -.2705324E-01   .5059187E-03
   .2866764E-01   .5133748E-01   .6625489E-01   .7383482E-01   .7239914E-01
   .5923670E-01   .3812324E-01   .2030775E-01   .1360113E-01   .1343670E-01
   .9323084E-02  -.2501821E-02  -.1713142E-01  -.2916064E-01  -.3716883E-01
  -.4097371E-01  -.4000349E-01  -.3504476E-01  -.2763778E-01  -.1771962E-01
  -.4411511E-02   .1152792E-01   .2759495E-01   .4078764E-01   .4790775E-01
   .4702908E-01   .4063071E-01   .3540494E-01   .3673979E-01   .4372275E-01
   .5147473E-01   .5710135E-01   .6099875E-01   .6377452E-01   .6469652E-01
   .6304023E-01   .5847066E-01   .5040855E-01   .3938943E-01   .2871052E-01
   .2234039E-01   .2108688E-01   .2205793E-01   .2180674E-01   .1947527E-01
   .1559879E-01   .9943318E-02   .3503095E-02   .9731654E-03   .6393534E-02
   .1561857E-01   .1934232E-01   .1657502E-01   .1788682E-01   .3075242E-01
   .4820226E-01   .5779023E-01   .5638702E-01   .4997846E-01   .4262708E-01
   .3185660E-01   .1439168E-01  -.7730683E-02  -.2816986E-01  -.4157468E-01
  -.4633785E-01  -.4340333E-01  -.3491815E-01  -.2442589E-01  -.1606194E-01
  -.1153810E-01  -.8701736E-02  -.4593326E-02   .1040128E-02   .6149263E-02
   .9382889E-02   .1177914E-01   .1485348E-01   .1782614E-01   .1845846E-01
   .1633353E-01   .1321645E-01   .1051980E-01   .8819989E-02   .9616591E-02
   .1410676E-01   .1888777E-01   .1645201E-01   .3474915E-02  -.1195974E-01
  -.1564279E-01  -.2147370E-02   .1846030E-01   .3105288E-01   .2976657E-01
   .1962292E-01   .7835126E-02  -.2159716E-02  -.1009986E-01  -.1683150E-01
  -.2314448E-01  -.2897676E-01  -.3330460E-01  -.3467687E-01  -.3113317E-01
  -.2055845E-01  -.4254819E-02   .1244538E-01   .2690667E-01   .4186646E-01
   .5667249E-01   .6212865E-01   .5236740E-01   .3631562E-01   .2742832E-01
   .2655003E-01   .2374978E-01   .1347903E-01   .4791734E-03  -.7772847E-02
  -.8026049E-02  -.1938099E-02   .5638176E-02   .9540023E-02   .8544696E-02
   .5876859E-02   .3831969E-02   .6529791E-03  -.5619142E-02  -.1306919E-01
  -.1714696E-01  -.1481223E-01  -.6466837E-02   .4596643E-02   .1405455E-01
   .1885589E-01   .1933024E-01   .1931897E-01   .2171465E-01   .2392446E-01
   .2103188E-01   .1350059E-01   .8638630E-02   .1324936E-01   .2486891E-01
   .3278045E-01   .3081882E-01   .2510214E-01   .2423432E-01   .2681814E-01
   .2517920E-01   .1837257E-01   .1366328E-01   .1502728E-01   .1766748E-01
   .1673319E-01   .1535852E-01   .1874065E-01   .2432866E-01   .2514872E-01
   .2052566E-01   .1638196E-01   .1684620E-01   .2196540E-01   .3257704E-01
   .5027960E-01   .7234527E-01   .9010274E-01   .9312265E-01   .7539755E-01
   .4056221E-01   .2453263E-02  -.2227060E-01  -.2434342E-01  -.6414084E-02
   .2110922E-01   .4948321E-01   .7673225E-01   .1006150E+00   .1084520E+00
   .8547307E-01   .3966081E-01   .3722769E-02  -.2415949E-02   .4244316E-02
   .2104185E-02   .2828476E-03   .1537969E-01   .3529681E-01   .3892039E-01
   .3257821E-01   .3562493E-01   .4600309E-01   .4714980E-01   .3585154E-01
   .2174592E-01   .8818230E-02  -.5376970E-02  -.1705806E-01  -.1510468E-01
   .6956345E-02   .4374265E-01   .8245928E-01   .1105088E+00   .1198561E+00
   .1095418E+00   .8763773E-01   .6808456E-01   .6025688E-01   .6139757E-01
   .6258580E-01   .6059864E-01   .5788474E-01   .5304365E-01   .4009738E-01
   .1836562E-01  -.4816848E-02  -.2168739E-01  -.2731546E-01  -.1846087E-01
   .9634361E-03   .1658310E-01   .1591824E-01   .2167329E-02  -.1037575E-01
  -.1159314E-01  -.3647533E-02   .4194939E-02   .6929591E-02   .8070441E-02
   .1177048E-01   .1546831E-01   .1491437E-01   .1285360E-01   .1771150E-01
   .3484799E-01   .6183538E-01   .9013714E-01   .1091215E+00   .1116107E+00
   .9927513E-01   .8089958E-01   .6284781E-01   .4233567E-01   .1300462E-01
  -.2317284E-01  -.5421017E-01  -.7068785E-01  -.7600804E-01  -.8026805E-01
  -.8799848E-01  -.9532396E-01  -.9562640E-01  -.8559782E-01  -.6684735E-01
  -.4381340E-01  -.2190651E-01  -.6992425E-02  -.2406293E-02  -.4339244E-02
  -.3946944E-02   .3146771E-02   .1154905E-01   .1252095E-01   .3296216E-02
  -.1149853E-01  -.2546488E-01  -.3579564E-01  -.4416481E-01  -.5346024E-01
  -.6399394E-01  -.7359512E-01  -.8084675E-01  -.8577455E-01  -.8640270E-01
  -.7833378E-01  -.6259613E-01  -.5044812E-01  -.5321118E-01  -.6843969E-01
  -.8369771E-01  -.9095186E-01  -.9061730E-01  -.8479535E-01  -.7361038E-01
  -.5842888E-01  -.4313447E-01  -.3131308E-01  -.2486540E-01  -.2472073E-01
  -.3097784E-01  -.4136874E-01  -.5157863E-01  -.5893731E-01  -.6413825E-01
  -.6720722E-01  -.6604304E-01  -.6216735E-01  -.6327509E-01  -.7416204E-01
  -.8676566E-01  -.8746698E-01  -.7619968E-01  -.6727682E-01  -.6822821E-01
  -.7279942E-01  -.7944864E-01  -.9748259E-01  -.1265172E+00  -.1468563E+00
  -.1410431E+00  -.1147949E+00  -.8860079E-01  -.7592646E-01  -.7510947E-01
  -.7678666E-01  -.7240922E-01  -.5868822E-01  -.3973033E-01  -.2472610E-01
  -.2042890E-01  -.2670862E-01  -.3916295E-01  -.5339371E-01  -.6765504E-01
  -.8235883E-01  -.9716165E-01  -.1094176E+00  -.1164559E+00  -.1178927E+00
  -.1138770E+00  -.1041086E+00  -.9040873E-01  -.7713301E-01  -.6768018E-01
  -.6219524E-01  -.5886728E-01  -.5575547E-01  -.5165472E-01  -.4647535E-01
  -.4055505E-01  -.3282425E-01  -.2124531E-01  -.5422310E-02   .1260188E-01
   .3046711E-01   .4725430E-01   .6162603E-01   .6980669E-01   .6796853E-01
   .5625203E-01   .3866997E-01   .1905596E-01  -.1096220E-02  -.2029131E-01
  -.3498100E-01  -.4188226E-01  -.4178047E-01  -.3836891E-01  -.3328623E-01
  -.2610227E-01  -.1859968E-01  -.1358654E-01  -.9882255E-02  -.3312046E-02
   .7383009E-02   .1932986E-01   .2932702E-01   .3592419E-01   .3823747E-01
   .3471765E-01   .2495871E-01   .1324850E-01   .7986201E-02   .1373291E-01
   .2433564E-01   .2832044E-01   .2172060E-01   .1094841E-01   .2636549E-02
  -.3743735E-02  -.1051778E-01  -.1527999E-01  -.1423140E-01  -.8937449E-02
  -.5063845E-02  -.5274548E-02  -.8350675E-02  -.1366590E-01  -.2048912E-01
  -.2355914E-01  -.1733562E-01  -.5671676E-02   .6795838E-03  -.2107977E-02
  -.7227950E-02  -.8426607E-02  -.7471560E-02  -.7199027E-02  -.4553770E-02
   .4079919E-02   .1493643E-01   .1984589E-01   .1758007E-01   .1693174E-01
   .2288726E-01   .2525474E-01   .1209838E-01  -.9101859E-02  -.1957552E-01
  -.1711541E-01  -.1862670E-01  -.3397735E-01  -.5220873E-01  -.5587086E-01
  -.3875362E-01  -.7651610E-02   .2599491E-01   .5386765E-01   .7371962E-01
   .8593211E-01   .8825169E-01   .7902163E-01   .6384975E-01   .5186291E-01
   .4601538E-01   .4394990E-01   .4655512E-01   .5668677E-01   .7095146E-01
   .8199087E-01   .8884079E-01   .9631467E-01   .1031158E+00   .1001867E+00
   .8430353E-01   .6564425E-01   .5638312E-01   .5637797E-01   .5557045E-01
   .4705604E-01   .3326933E-01   .2130826E-01   .1679812E-01   .2110494E-01
   .3057792E-01   .3882084E-01   .4191795E-01   .4122544E-01   .3976591E-01
   .3675387E-01   .2806746E-01   .1226059E-01  -.6516752E-02  -.2292520E-01
  -.3528014E-01  -.4460830E-01  -.5133104E-01  -.5478419E-01  -.5433753E-01
  -.4892169E-01  -.3743736E-01  -.2251592E-01  -.1101541E-01  -.6063667E-02
  -.1404157E-02   .1039787E-01   .2650557E-01   .3662632E-01   .3518515E-01
   .2433817E-01   .6418181E-02  -.1859078E-01  -.4696745E-01  -.7052962E-01
  -.8410048E-01  -.8944540E-01  -.9043823E-01  -.8763179E-01  -.7945238E-01
  -.6620057E-01  -.5072299E-01  -.3605335E-01  -.2428966E-01  -.1736018E-01
  -.1724758E-01  -.2400372E-01  -.3409132E-01  -.4233403E-01  -.4537200E-01
  -.4288018E-01  -.3582200E-01  -.2500995E-01  -.1235631E-01  -.1220607E-02
   .6935484E-02   .1555649E-01   .2989838E-01   .5090944E-01   .7264766E-01
   .8527855E-01   .8133536E-01   .6082986E-01   .3103743E-01   .8772459E-03
  -.2375214E-01  -.3880616E-01  -.4076269E-01  -.3014218E-01  -.1399006E-01
  -.6094647E-03   .7988905E-02   .1494276E-01   .2142042E-01   .2441844E-01
   .2198749E-01   .1760522E-01   .1673213E-01   .2016994E-01   .2327704E-01
   .2214448E-01   .1768983E-01   .1252665E-01   .7109761E-02   .2397128E-03
  -.8746359E-02  -.1936949E-01  -.2905479E-01  -.3238606E-01  -.2474907E-01
  -.7618633E-02   .1180663E-01   .2707285E-01   .3729612E-01   .4562832E-01
   .5451932E-01   .6255870E-01   .6602944E-01   .6333104E-01   .5733618E-01
   .5283312E-01   .5235913E-01   .5534804E-01   .5947328E-01   .6220126E-01
   .6268454E-01   .6318308E-01   .6730559E-01   .7485356E-01   .7941345E-01
   .7384716E-01   .5795112E-01   .3892221E-01   .2518035E-01   .2031981E-01
   .2222584E-01   .2645932E-01   .3007234E-01   .3309444E-01   .3644254E-01
   .3923506E-01   .3984980E-01   .3889463E-01   .3962175E-01   .4566189E-01
   .5837568E-01   .7531184E-01   .9055228E-01   .9863838E-01   .9849569E-01
   .9251012E-01   .8400592E-01   .7650042E-01   .7229324E-01   .6930982E-01
   .6191286E-01   .4812057E-01   .3452563E-01   .3073413E-01   .3918914E-01
   .5227268E-01   .6085147E-01   .6358667E-01   .6602889E-01   .7279625E-01
   .8214872E-01   .8752033E-01   .8362106E-01   .7102387E-01   .5421012E-01
   .3649249E-01   .1895093E-01   .3469698E-02  -.5076354E-02  -.2222609E-02
   .1033612E-01   .2498586E-01   .3471885E-01   .3843331E-01   .3974263E-01
   .4237120E-01   .4704763E-01   .5091750E-01   .4944842E-01   .4023732E-01
   .2651973E-01   .1613461E-01   .1439652E-01   .1784196E-01   .1789109E-01
   .1081915E-01   .9986225E-03  -.5940543E-02  -.9318326E-02  -.1181119E-01
  -.1499174E-01  -.1849232E-01  -.2135367E-01  -.2285712E-01  -.2211323E-01
  -.1767733E-01  -.8510768E-02   .3762536E-02   .1515615E-01   .2382170E-01
   .3231621E-01   .4308303E-01   .5233951E-01   .5263568E-01   .4208888E-01
   .2725054E-01   .1496935E-01   .4624872E-02  -.8848766E-02  -.2624346E-01
  -.4242808E-01  -.5278406E-01  -.5750696E-01  -.5888698E-01  -.5779555E-01
  -.5414648E-01  -.4846862E-01  -.4174459E-01  -.3473338E-01  -.2762429E-01
  -.1931623E-01  -.7613591E-02   .8664864E-02   .2711951E-01   .4157403E-01
   .4544757E-01   .3644168E-01   .1947974E-01   .5408014E-02   .3951439E-02
   .1457326E-01   .2494139E-01   .2338207E-01   .1352251E-01   .1056543E-01
   .2169132E-01   .3663304E-01   .4073991E-01   .3055181E-01   .1277321E-01
  -.5961499E-02  -.2276668E-01  -.3547875E-01  -.4189191E-01  -.4198553E-01
  -.3693354E-01  -.2650898E-01  -.1079500E-01   .6155766E-02   .1814178E-01
   .2266294E-01   .2342042E-01   .2778427E-01   .4024293E-01   .5561620E-01
   .6093745E-01   .4921496E-01   .3051596E-01   .2359477E-01   .3545391E-01
   .5334713E-01   .5729196E-01   .3789146E-01   .3421004E-02  -.2569501E-01
  -.3145575E-01  -.1470638E-01   .4970524E-02   .1157932E-01   .8948030E-02
   .1024035E-01   .1986478E-01   .3259112E-01   .4330128E-01   .5010188E-01
   .5166589E-01   .4859635E-01   .4594348E-01   .4894385E-01   .5629766E-01
   .6148310E-01   .6080489E-01   .5675736E-01   .5359799E-01   .5261242E-01
   .5326555E-01   .5621311E-01   .6221541E-01   .6865408E-01   .6957502E-01
   .6065508E-01   .4349715E-01   .2409805E-01   .7425844E-02  -.5978834E-02
  -.1851142E-01  -.3082772E-01  -.4004178E-01  -.4201416E-01  -.3468796E-01
  -.2047548E-01  -.5295355E-02   .5738504E-02   .1248308E-01   .1859894E-01
   .2628948E-01   .3326050E-01   .3499166E-01   .2867708E-01   .1504315E-01
  -.1668175E-02  -.1518807E-01  -.2058975E-01  -.1734106E-01  -.8630674E-02
   .2017323E-02   .1237954E-01   .2006071E-01   .2284147E-01   .2183928E-01
   .2110437E-01   .2249864E-01   .2271842E-01   .1689262E-01   .4631609E-02
  -.9097443E-02  -.1823359E-01  -.1953709E-01  -.1384791E-01  -.5887890E-02
  -.2336873E-02  -.7471066E-02  -.1912840E-01  -.3051344E-01  -.3714374E-01
  -.3997329E-01  -.4183393E-01  -.4307540E-01  -.4169530E-01  -.3584910E-01
  -.2534929E-01  -.1199643E-01   .1192709E-03   .6208392E-02   .4414479E-02
  -.3187869E-02  -.1403152E-01  -.2780889E-01  -.4312021E-01  -.5352420E-01
  -.5195407E-01  -.4052365E-01  -.3024047E-01  -.2762166E-01  -.2623164E-01
  -.1503159E-01   .7510044E-02   .3067674E-01   .4260770E-01   .4194268E-01
   .3699943E-01   .3469725E-01   .3314787E-01   .2569194E-01   .9308452E-02
  -.1291905E-01  -.3524841E-01  -.5288755E-01  -.6363367E-01  -.6822842E-01
  -.6943353E-01  -.6962568E-01  -.6888617E-01  -.6540844E-01  -.5815151E-01
  -.4798670E-01  -.3665167E-01  -.2617947E-01  -.1910001E-01  -.1756906E-01
  -.2198350E-01  -.3052622E-01  -.4048907E-01  -.5017839E-01  -.5934565E-01
  -.6772708E-01  -.7378911E-01  -.7550800E-01  -.7242753E-01  -.6588392E-01
  -.5660026E-01  -.4417715E-01  -.2981655E-01  -.1803069E-01  -.1380441E-01
  -.1811519E-01  -.2745522E-01  -.3741416E-01  -.4567574E-01  -.5212372E-01
  -.5795800E-01  -.6533223E-01  -.7557010E-01  -.8670871E-01  -.9329817E-01
  -.8993372E-01  -.7591110E-01  -.5616420E-01  -.3744905E-01  -.2361479E-01
  -.1438885E-01  -.8188872E-02  -.4526927E-02  -.3621105E-02  -.5358071E-02
  -.9360781E-02  -.1518390E-01  -.2165363E-01  -.2643926E-01  -.2638379E-01
  -.1844785E-01  -.1161278E-02   .2331731E-01   .4812336E-01   .6478231E-01
   .6903180E-01   .6273794E-01   .5025577E-01   .3509269E-01   .2019191E-01
   .7983479E-02  -.1522610E-02  -.1137102E-01  -.2460511E-01  -.3930277E-01
  -.4775619E-01  -.4349030E-01  -.2951912E-01  -.1748978E-01  -.1681198E-01
  -.2578421E-01  -.3454958E-01  -.3542882E-01  -.2952738E-01  -.2371498E-01
  -.2376928E-01  -.3067230E-01  -.3954178E-01  -.4146180E-01  -.3020993E-01
  -.9552612E-02   .8080367E-02   .1325520E-01   .9861373E-02   .1223735E-01
   .3017115E-01   .5615130E-01   .7101181E-01   .6507698E-01   .4867553E-01
   .3636912E-01   .2829115E-01   .1626531E-01   .9756698E-03  -.9373233E-02
  -.1353677E-01  -.1827761E-01  -.2582013E-01  -.3001676E-01  -.2603836E-01
  -.1736510E-01  -.1050125E-01  -.6791225E-02  -.1826758E-02   .8310223E-02
   .2195102E-01   .3277978E-01   .3528464E-01   .2909650E-01   .1806358E-01
   .5849145E-02  -.6483171E-02  -.1902399E-01  -.2985037E-01  -.3498721E-01
  -.3259755E-01  -.2541849E-01  -.1708011E-01  -.7652125E-02   .4906033E-02
   .1966159E-01   .3158202E-01   .3461343E-01   .2539264E-01   .6025185E-02
  -.1580481E-01  -.3176147E-01  -.4030473E-01  -.4705745E-01  -.5589485E-01
  -.6212026E-01  -.5817944E-01  -.4394116E-01  -.2719845E-01  -.1547991E-01
  -.1048654E-01  -.1106590E-01  -.1651316E-01  -.2455022E-01  -.3058223E-01
  -.3104665E-01  -.2596587E-01  -.1801599E-01  -.1066366E-01  -.7459045E-02
  -.1060941E-01  -.1887775E-01  -.2784882E-01  -.3329279E-01  -.3440478E-01
  -.3347023E-01  -.3332333E-01  -.3458193E-01  -.3467294E-01  -.3007175E-01
  -.2001528E-01  -.7863755E-02   .1391324E-02   .5305314E-02   .5417729E-02
   .3880090E-02   .3583659E-03  -.6310867E-02  -.1419491E-01  -.1843824E-01
  -.1559976E-01  -.5796541E-02   .8247263E-02   .2204415E-01   .3088738E-01
   .3289778E-01   .3046960E-01   .2765449E-01   .2607980E-01   .2483612E-01
   .2305663E-01   .2135121E-01   .2134850E-01   .2361439E-01   .2622283E-01
   .2624754E-01   .2348952E-01   .2201576E-01   .2553200E-01   .3159525E-01
   .3295737E-01   .2586886E-01   .1523536E-01   .9765318E-02   .1281256E-01
   .1938740E-01   .2174709E-01   .1603666E-01   .4490133E-02  -.7376000E-02
  -.1569535E-01  -.2066479E-01  -.2435475E-01  -.2748387E-01  -.2907949E-01
  -.2835402E-01  -.2600640E-01  -.2388685E-01  -.2405196E-01  -.2739719E-01
  -.3291569E-01  -.3863836E-01  -.4348151E-01  -.4759402E-01  -.4961387E-01
  -.4560139E-01  -.3412625E-01  -.2056552E-01  -.1222823E-01  -.1015301E-01
  -.1017477E-01  -.1158284E-01  -.1843807E-01  -.3182727E-01  -.4590834E-01
  -.5348489E-01  -.5234245E-01  -.4514012E-01  -.3635073E-01  -.2983511E-01
  -.2631258E-01  -.2235003E-01  -.1414718E-01  -.2612144E-02   .6324393E-02
   .6967700E-02  -.5970012E-03  -.1066777E-01  -.1657303E-01  -.1525831E-01
  -.8241314E-02   .6025542E-03   .8084565E-02   .1320657E-01   .1666717E-01
   .1952446E-01   .2206470E-01   .2364242E-01   .2367014E-01   .2302156E-01
   .2346607E-01   .2512428E-01   .2624045E-01   .2613959E-01   .2663350E-01
   .2991439E-01   .3555492E-01   .4024913E-01   .4106115E-01   .3854293E-01
   .3624276E-01   .3713912E-01   .4011081E-01   .4071592E-01   .3641284E-01
   .2967687E-01   .2507509E-01   .2396793E-01   .2393947E-01   .2275405E-01
   .2072655E-01   .1918792E-01   .1764378E-01   .1414248E-01   .8292609E-02
   .3018674E-02   .1974084E-02   .5716525E-02   .1104065E-01   .1359751E-01
   .1148273E-01   .6156543E-02   .1066457E-02  -.1262964E-02  -.1511948E-02
  -.3639709E-02  -.1234854E-01  -.2916438E-01  -.4998629E-01  -.6688462E-01
  -.7317830E-01  -.6700322E-01  -.5122365E-01  -.3059603E-01  -.9947760E-02
   .6369778E-02   .1581879E-01   .1933517E-01   .2067625E-01   .2189987E-01
   .2017444E-01   .1050181E-01  -.7829519E-02  -.2886046E-01  -.4473821E-01
  -.5176998E-01  -.5203477E-01  -.4973552E-01  -.4690212E-01  -.4293094E-01
  -.3740960E-01  -.3201747E-01  -.2847478E-01  -.2545414E-01  -.1979621E-01
  -.1092715E-01  -.1831213E-02   .4106454E-02   .5923792E-02   .4427017E-02
   .6609954E-03  -.4702113E-02  -.1092982E-01  -.1691075E-01  -.2183543E-01
  -.2577929E-01  -.2931931E-01  -.3241357E-01  -.3338736E-01  -.2982068E-01
  -.2082385E-01  -.8389278E-02   .2757847E-02   .7191504E-02   .1947069E-02
  -.1149908E-01  -.2896029E-01  -.4693990E-01  -.6367399E-01  -.7716004E-01
  -.8372989E-01  -.7954624E-01  -.6349541E-01  -.3858590E-01  -.1106750E-01
   .1221321E-01   .2668622E-01   .3092208E-01   .2677810E-01   .1909742E-01
   .1369686E-01   .1424901E-01   .2033081E-01   .2803018E-01   .3275003E-01
   .3249002E-01   .2786972E-01   .1918948E-01   .6220617E-02  -.8581306E-02
  -.2003636E-01  -.2506492E-01  -.2573516E-01  -.2602971E-01  -.2712710E-01
  -.2717652E-01  -.2468384E-01  -.2043721E-01  -.1612367E-01  -.1235127E-01
  -.8280834E-02  -.2953101E-02   .3701559E-02   .1113966E-01   .1890922E-01
   .2595738E-01   .3030992E-01   .3061519E-01   .2820698E-01   .2628933E-01
   .2623647E-01   .2633215E-01   .2463057E-01   .2170943E-01   .2001406E-01
   .2017447E-01   .1900334E-01   .1229980E-01  -.5093785E-03  -.1543579E-01
  -.2792934E-01  -.3622578E-01  -.4008960E-01  -.3890442E-01  -.3290812E-01
  -.2456872E-01  -.1682654E-01  -.1042160E-01  -.3527783E-02   .5199721E-02
   .1434525E-01   .2147591E-01   .2598146E-01   .2820198E-01   .2766330E-01
   .2537113E-01   .2554378E-01   .3125337E-01   .3955899E-01   .4407071E-01
   .4215980E-01   .3753832E-01   .3532584E-01   .3634864E-01   .3754390E-01
   .3632155E-01   .3278942E-01   .2839007E-01   .2399334E-01   .1977593E-01
   .1592755E-01   .1220146E-01   .7663986E-02   .1505924E-02  -.5496835E-02
  -.1068709E-01  -.1177765E-01  -.8200492E-02  -.3746327E-03   .1096769E-01
   .2404651E-01   .3632367E-01   .4688299E-01   .5638688E-01   .6391414E-01
   .6607822E-01   .6059736E-01   .4878164E-01   .3381884E-01   .1839180E-01
   .4271328E-02  -.7189738E-02  -.1493161E-01  -.1749050E-01  -.1253071E-01
   .1585399E-02   .2288518E-01   .4542607E-01   .6323066E-01   .7446828E-01
   .8126238E-01   .8552815E-01   .8627348E-01   .8122632E-01   .7007040E-01
   .5572121E-01   .4258871E-01   .3371307E-01   .2891317E-01   .2546052E-01
   .2062372E-01   .1410184E-01   .7968637E-02   .5040222E-02   .7993585E-02
   .1835671E-01   .3474021E-01   .5262575E-01   .6666061E-01   .7374026E-01
   .7384477E-01   .6838831E-01   .5878570E-01   .4639594E-01   .3305852E-01
   .2047091E-01   .9056022E-02  -.1832405E-02  -.1271680E-01  -.2260150E-01
  -.2913322E-01  -.3067088E-01  -.2799578E-01  -.2403500E-01  -.2175932E-01
  -.2204260E-01  -.2353446E-01  -.2369640E-01  -.2088689E-01  -.1591921E-01
  -.1157951E-01  -.1032740E-01  -.1252447E-01  -.1708312E-01  -.2271188E-01
  -.2851508E-01  -.3399362E-01  -.3814576E-01  -.3928738E-01  -.3600519E-01
  -.2803125E-01  -.1666739E-01  -.4533866E-02   .5141892E-02   .1030581E-01
   .1104611E-01   .8736260E-02   .4552463E-02  -.1680273E-02  -.1131725E-01
  -.2532717E-01  -.4268345E-01  -.5992412E-01  -.7295200E-01  -.7952078E-01
  -.8021316E-01  -.7755431E-01  -.7411499E-01  -.7137852E-01  -.6951947E-01
  -.6749912E-01  -.6373152E-01  -.5794170E-01  -.5197528E-01  -.4851426E-01
  -.4944358E-01  -.5516234E-01  -.6463847E-01  -.7559198E-01  -.8533896E-01
  -.9272592E-01  -.9837137E-01  -.1026886E+00  -.1046632E+00  -.1034161E+00
  -.1001430E+00  -.9729229E-01  -.9599814E-01  -.9511632E-01  -.9318474E-01
  -.9027893E-01  -.8714485E-01  -.8409209E-01  -.8113488E-01  -.7840842E-01
  -.7619899E-01  -.7441229E-01  -.7227749E-01  -.6880474E-01  -.6416760E-01
  -.6102554E-01  -.6278898E-01  -.7005599E-01  -.7937959E-01  -.8720592E-01
  -.9449119E-01  -.1037462E+00  -.1127467E+00  -.1175761E+00  -.1204500E+00
  -.1263938E+00  -.1322947E+00  -.1283053E+00  -.1121397E+00  -.9324879E-01
  -.7980858E-01  -.6969793E-01  -.5791259E-01  -.4593813E-01  -.3965888E-01
  -.4193633E-01  -.5084445E-01  -.6278662E-01  -.7419565E-01  -.8165150E-01
  -.8295998E-01  -.7850942E-01  -.7079161E-01  -.6127244E-01  -.4894643E-01
  -.3334847E-01  -.1803489E-01  -.8014381E-02  -.3691157E-02  -.3058183E-03
   .6085743E-02   .1425282E-01   .2052573E-01   .2379069E-01   .2619774E-01
   .2970052E-01   .3383604E-01   .3774514E-01   .4244008E-01   .4917828E-01
   .5683354E-01   .6248403E-01   .6411595E-01   .6172762E-01   .5662791E-01
   .4981235E-01   .4148238E-01   .3204692E-01   .2281413E-01   .1513774E-01
   .9072680E-02   .3927180E-02   .3832714E-03   .2774928E-03   .4840121E-02
   .1323831E-01   .2270344E-01   .3026044E-01   .3469659E-01   .3746307E-01
   .4127008E-01   .4785310E-01   .5690589E-01   .6682326E-01   .7573718E-01
   .8205861E-01   .8497810E-01   .8483286E-01   .8275622E-01   .8031789E-01
   .7917197E-01   .7978913E-01   .8095146E-01   .8132609E-01   .8090134E-01
   .8088292E-01   .8299467E-01   .8824228E-01   .9536092E-01   .1016808E+00
   .1059598E+00   .1088049E+00   .1098959E+00   .1070990E+00   .9995046E-01
   .9187802E-01   .8653613E-01   .8405789E-01   .8290927E-01   .8367031E-01
   .8890253E-01   .9937121E-01   .1120151E+00   .1222990E+00   .1285058E+00
   .1320178E+00   .1336317E+00   .1315309E+00   .1234969E+00   .1098882E+00
   .9393917E-01   .7948094E-01   .6870158E-01   .6193419E-01   .5835186E-01
   .5668332E-01   .5635927E-01   .5778516E-01   .6108320E-01   .6504632E-01
   .6802039E-01   .6973986E-01   .7093983E-01   .7134522E-01   .6909893E-01
   .6265083E-01   .5213046E-01   .3841755E-01   .2214166E-01   .5006530E-02
  -.9313117E-02  -.1789960E-01  -.2175141E-01  -.2459194E-01  -.2746590E-01
  -.2660315E-01  -.1760258E-01  -.2980175E-03   .1997831E-01   .3465004E-01
   .3746803E-01   .2928920E-01   .1704760E-01   .7225752E-02   .9644865E-03
  -.3799214E-02  -.7974581E-02  -.1039167E-01  -.9450188E-02  -.4244045E-02
   .4813580E-02   .1509148E-01   .2318947E-01   .2826112E-01   .3177781E-01
   .3389813E-01   .3206807E-01   .2392858E-01   .1058522E-01  -.3675358E-02
  -.1506992E-01  -.2289578E-01  -.2772726E-01  -.2939407E-01  -.3023242E-01
  -.3590749E-01  -.4456002E-01  -.4255548E-01  -.2304527E-01  -.2052143E-02
  -.7029061E-03  -.1590248E-01  -.2489719E-01  -.1722530E-01  -.6437526E-02
  -.8066957E-02  -.1925643E-01  -.2663357E-01  -.2576951E-01  -.2409254E-01
  -.2710401E-01  -.3013850E-01  -.2634024E-01  -.1671471E-01  -.7895240E-02
  -.2859099E-02   .1329548E-02   .6684457E-02   .9671842E-02   .7015954E-02
   .2682566E-02   .4364062E-02   .1344893E-01   .2229035E-01   .2385095E-01
   .2065535E-01   .1992550E-01   .2277982E-01   .2380481E-01   .1992422E-01
   .1341269E-01   .6140837E-02  -.2801693E-02  -.1244067E-01  -.1857957E-01
  -.1905427E-01  -.1667505E-01  -.1427696E-01  -.1018813E-01  -.1882136E-02
   .7997616E-02   .1314731E-01   .1081958E-01   .4781925E-02   .5617814E-03
  -.1880052E-03   .4492395E-03   .7543178E-03   .5895478E-03   .3557026E-03
   .1973831E-02   .8786394E-02   .2117016E-01   .3199862E-01   .3149363E-01
   .1862904E-01   .4144955E-02  -.1552295E-02  -.1223006E-02  -.6348498E-02
  -.2120132E-01  -.3677820E-01  -.4205975E-01  -.3685234E-01  -.2978888E-01
  -.2621439E-01  -.2277503E-01  -.1375707E-01   .9152476E-03   .1580620E-01
   .2568492E-01   .2902283E-01   .2724715E-01   .2284762E-01   .1834934E-01
   .1583823E-01   .1624129E-01   .1953991E-01   .2482743E-01   .2914594E-01
   .2893171E-01   .2400240E-01   .1833774E-01   .1560342E-01   .1629555E-01
   .1995881E-01   .2647514E-01   .3351828E-01   .3600902E-01   .3071848E-01
   .1935238E-01   .6314812E-02  -.5144834E-02  -.1413442E-01  -.2099757E-01
  -.2670235E-01  -.3236787E-01  -.3770983E-01  -.4020728E-01  -.3684573E-01
  -.2642214E-01  -.1049486E-01   .6680836E-02   .1956761E-01   .2371970E-01
   .1845057E-01   .7595416E-02  -.2642774E-02  -.6546873E-02  -.1225136E-02
   .1105895E-01   .2294135E-01   .2783601E-01   .2715896E-01   .2828428E-01
   .3371828E-01   .3654498E-01   .2984225E-01   .1675512E-01   .6110384E-02
   .1157994E-02  -.1772172E-02  -.4480810E-02  -.3198654E-02   .4265180E-02
   .1258950E-01   .1358981E-01   .4642364E-02  -.1009215E-01  -.2453161E-01
  -.3453847E-01  -.3912442E-01  -.4046314E-01  -.4224436E-01  -.4631338E-01
  -.5097120E-01  -.5236152E-01  -.4657199E-01  -.3202788E-01  -.1177511E-01
   .6986440E-02   .1821333E-01   .2219059E-01   .2402098E-01   .2734509E-01
   .3142096E-01   .3394593E-01   .3476341E-01   .3570467E-01   .3797671E-01
   .4049824E-01   .4109894E-01   .3829871E-01   .3294028E-01   .2870305E-01
   .2910893E-01   .3290776E-01   .3399898E-01   .2849298E-01   .2038955E-01
   .1728587E-01   .2125918E-01   .2657706E-01   .2683628E-01   .2154421E-01
   .1434980E-01   .8373491E-02   .4779174E-02   .3549937E-02   .4091299E-02
   .4455949E-02   .2232625E-02  -.2229810E-02  -.4998162E-02  -.2721105E-02
   .2514313E-02   .4845879E-02   .1072477E-02  -.6128837E-02  -.1181062E-01
  -.1377227E-01  -.1415954E-01  -.1751819E-01  -.2623824E-01  -.3730152E-01
  -.4427893E-01  -.4336522E-01  -.3652085E-01  -.2801377E-01  -.1988662E-01
  -.1187186E-01  -.3448628E-02   .6133212E-02   .1813298E-01   .3265256E-01
   .4702492E-01   .5666996E-01   .5818723E-01   .5204121E-01   .4198384E-01
   .3287821E-01   .2787200E-01   .2681387E-01   .2740908E-01   .2754470E-01
   .2608977E-01   .2189514E-01   .1396720E-01   .3998708E-02  -.2990209E-02
  -.3823247E-02  -.1746157E-02  -.2899710E-02  -.9086697E-02  -.1629061E-01
  -.1986839E-01  -.1856165E-01  -.1290387E-01  -.3512523E-02   .7368392E-02
   .1506478E-01   .1653911E-01   .1504249E-01   .1751155E-01   .2608747E-01
   .3483118E-01   .3648186E-01   .3051982E-01   .2277529E-01   .1846253E-01
   .1845687E-01   .2101373E-01   .2357474E-01   .2314697E-01   .1759914E-01
   .7987729E-02  -.1479148E-02  -.6615382E-02  -.6019418E-02  -.1239392E-02
   .5414551E-02   .1227725E-01   .1799600E-01   .2166576E-01   .2325898E-01
   .2296582E-01   .1989398E-01   .1238939E-01   .3239239E-03  -.1292057E-01
  -.2189976E-01  -.2362534E-01  -.1979894E-01  -.1425942E-01  -.8953993E-02
  -.3439053E-02   .2913309E-02   .9140714E-02   .1301881E-01   .1274446E-01
   .8802905E-02   .4262038E-02   .1945167E-02   .1382864E-02   .2526571E-03
  -.1664468E-02  -.1901751E-02   .9030858E-03   .4388055E-02   .4729436E-02
   .7181253E-03  -.5487756E-02  -.1113469E-01  -.1428414E-01  -.1271274E-01
  -.4966549E-02   .6071603E-02   .1373014E-01   .1352142E-01   .6674150E-02
  -.1771821E-02  -.7196090E-02  -.8491564E-02  -.8072267E-02  -.9344589E-02
  -.1338614E-01  -.1764462E-01  -.1828689E-01  -.1408858E-01  -.7594190E-02
  -.2344879E-02   .1286794E-03  -.1362183E-03  -.3595872E-02  -.1111110E-01
  -.2170782E-01  -.3197479E-01  -.3852294E-01  -.4053619E-01  -.3957563E-01
  -.3742939E-01  -.3498459E-01  -.3257154E-01  -.2988222E-01  -.2563737E-01
  -.1921029E-01  -.1229872E-01  -.7738482E-02  -.6197814E-02  -.5130943E-02
  -.1815605E-02   .4113297E-02   .1085216E-01   .1568240E-01   .1614492E-01
   .1077997E-01   .9874871E-04  -.1272656E-01  -.2277550E-01  -.2666681E-01
  -.2507750E-01  -.2091310E-01  -.1543313E-01  -.8088949E-02   .2401943E-03
   .6686965E-02   .9350026E-02   .8453547E-02   .4071627E-02  -.4732386E-02
  -.1732148E-01  -.2995533E-01  -.3826893E-01  -.4036331E-01  -.3692891E-01
  -.3008245E-01  -.2275696E-01  -.1816980E-01  -.1802534E-01  -.2141412E-01
  -.2613250E-01  -.3106436E-01  -.3665700E-01  -.4316894E-01  -.4919776E-01
  -.5195505E-01  -.4864652E-01  -.3867141E-01  -.2526206E-01  -.1373199E-01
  -.7302698E-02  -.5037408E-02  -.3968454E-02  -.2553230E-02  -.1206040E-02
  -.3983296E-03   .6130522E-03   .3239193E-02   .7145511E-02   .9263548E-02
   .6348502E-02  -.1827677E-02  -.1249619E-01  -.2219191E-01  -.2887007E-01
  -.3273396E-01  -.3532447E-01  -.3725633E-01  -.3657978E-01  -.3094365E-01
  -.2091195E-01  -.9673104E-02   .5979811E-03   .1010841E-01   .1861625E-01
   .2389403E-01   .2426220E-01   .2052880E-01   .1424552E-01   .6167330E-02
  -.2805066E-02  -.1131744E-01  -.1886878E-01  -.2637197E-01  -.3442017E-01
  -.4138237E-01  -.4400730E-01  -.3986940E-01  -.2940434E-01  -.1609801E-01
  -.4469394E-02   .2372097E-02   .3976104E-02   .1626046E-02  -.3003852E-02
  -.8383877E-02  -.1368963E-01  -.1844686E-01  -.2214654E-01  -.2464745E-01
  -.2646675E-01  -.2793649E-01  -.2819993E-01  -.2638008E-01  -.2298963E-01
  -.1899458E-01  -.1432909E-01  -.8804414E-02  -.4167150E-02  -.3722798E-02
  -.9019935E-02  -.1796999E-01  -.2662190E-01  -.3231754E-01  -.3482127E-01
  -.3436222E-01  -.3010551E-01  -.2111439E-01  -.8562391E-02   .3465517E-02
   .1005220E-01   .9704334E-02   .5882901E-02   .2626986E-02  -.3100610E-03
  -.5835980E-02  -.1360295E-01  -.1890681E-01  -.1861772E-01  -.1535748E-01
  -.1413290E-01  -.1696434E-01  -.2235730E-01  -.2748545E-01  -.2970411E-01
  -.2767169E-01  -.2229753E-01  -.1675148E-01  -.1446813E-01  -.1579681E-01
  -.1746612E-01  -.1632382E-01  -.1299296E-01  -.1049678E-01  -.1058838E-01
  -.1306802E-01  -.1761758E-01  -.2318677E-01  -.2660655E-01  -.2556485E-01
  -.2297430E-01  -.2394707E-01  -.2898833E-01  -.3416478E-01  -.3698432E-01
  -.3877887E-01  -.4060133E-01  -.4049634E-01  -.3614217E-01  -.2833898E-01
  -.2011259E-01  -.1398988E-01  -.1075895E-01  -.9582427E-02  -.9502138E-02
  -.1054360E-01  -.1338985E-01  -.1878108E-01  -.2708767E-01  -.3769992E-01
  -.4811394E-01  -.5473516E-01  -.5598744E-01  -.5488190E-01  -.5634863E-01
  -.6129956E-01  -.6541515E-01  -.6452950E-01  -.5962653E-01  -.5505592E-01
  -.5313240E-01  -.5276855E-01  -.5211561E-01  -.5015442E-01  -.4605225E-01
  -.3963130E-01  -.3277405E-01  -.2804039E-01  -.2552736E-01  -.2286663E-01
  -.1892132E-01  -.1583984E-01  -.1632556E-01  -.1998643E-01  -.2445419E-01
  -.2856016E-01  -.3242177E-01  -.3497779E-01  -.3360709E-01  -.2699714E-01
  -.1729602E-01  -.9124736E-02  -.5820260E-02  -.6673044E-02  -.7678726E-02
  -.5499447E-02  -.1212432E-02   .8967491E-03  -.1779564E-02  -.7006840E-02
  -.1031498E-01  -.9960272E-02  -.7987024E-02  -.7034007E-02  -.7533806E-02
  -.7860185E-02  -.6482326E-02  -.3349444E-02   .5276579E-04   .2141917E-02
   .3146247E-02   .5135775E-02   .9173108E-02   .1377121E-01   .1707694E-01
   .1920203E-01   .2185670E-01   .2560874E-01   .2855863E-01   .2930689E-01
   .2919628E-01   .3025295E-01   .3200707E-01   .3263653E-01   .3223173E-01
   .3314545E-01   .3681101E-01   .4194808E-01   .4620572E-01   .4802908E-01
   .4760254E-01   .4645432E-01   .4607768E-01   .4668764E-01   .4694277E-01
   .4517272E-01   .4114808E-01   .3635091E-01   .3285587E-01   .3226675E-01
   .3512957E-01   .4029025E-01   .4526204E-01   .4803577E-01   .4794748E-01
   .4526324E-01   .4078850E-01   .3520836E-01   .2857053E-01   .2074026E-01
   .1317521E-01   .9269772E-02   .1169432E-01   .1900612E-01   .2600702E-01
   .2882241E-01   .2809249E-01   .2690887E-01   .2754676E-01   .3035205E-01
   .3410815E-01   .3632988E-01   .3406843E-01   .2687330E-01   .1943453E-01
   .1868235E-01   .2612093E-01   .3475060E-01   .3661704E-01   .3171689E-01
   .2663438E-01   .2617622E-01   .2980231E-01   .3501077E-01   .4041843E-01
   .4577249E-01   .5074754E-01   .5429841E-01   .5523437E-01   .5355523E-01
   .5093836E-01   .4852378E-01   .4437104E-01   .3554016E-01   .2259867E-01
   .9931587E-02   .4859237E-03  -.7425910E-02  -.1585710E-01  -.2304342E-01
  -.2612394E-01  -.2540727E-01  -.2291422E-01  -.1853219E-01  -.1095456E-01
  -.1962742E-02   .3719270E-02   .3527244E-02  -.5887200E-03  -.5399645E-02
  -.1051664E-01  -.1745084E-01  -.2593571E-01  -.3285888E-01  -.3508717E-01
  -.3204060E-01  -.2551261E-01  -.1777855E-01  -.1052688E-01  -.4774939E-02
  -.4642455E-04   .5906029E-02   .1503886E-01   .2611367E-01   .3436625E-01
   .3517575E-01   .2775258E-01   .1564422E-01   .4624672E-02  -.5792646E-03
   .1608757E-02   .8487656E-02   .1269067E-01   .5800091E-02  -.1363436E-01
  -.3597812E-01  -.4790556E-01  -.4475978E-01  -.3482000E-01  -.2974278E-01
  -.3226776E-01  -.3571770E-01  -.3507122E-01  -.3348501E-01  -.3518218E-01
  -.3726342E-01  -.3409186E-01  -.2742700E-01  -.2559850E-01  -.3152585E-01
  -.3804361E-01  -.3688020E-01  -.2833855E-01  -.1942451E-01  -.1607719E-01
  -.2000946E-01  -.2875038E-01  -.3586869E-01  -.3510981E-01  -.2745665E-01
  -.2012116E-01  -.1708744E-01  -.1564153E-01  -.1346411E-01  -.1227986E-01
  -.1213218E-01  -.9551503E-02  -.3985429E-02  -.2193770E-03  -.2161429E-02
  -.8667596E-02  -.1680276E-01  -.2458138E-01  -.2961251E-01  -.2932996E-01
  -.2451936E-01  -.1917620E-01  -.1519077E-01  -.9841794E-02  -.1728584E-03
   .1190728E-01   .2125510E-01   .2505215E-01   .2473823E-01   .2311118E-01
   .2157426E-01   .2035962E-01   .1885310E-01   .1531374E-01   .8980509E-02
   .3004493E-02   .2353905E-02   .7489264E-02   .1251129E-01   .1216806E-01
   .8649241E-02   .8907755E-02   .1598729E-01   .2591475E-01   .3275186E-01
   .3461351E-01   .3408055E-01   .3431490E-01   .3594085E-01   .3657093E-01
   .3195371E-01   .1963496E-01   .2788899E-02  -.1126343E-01  -.1760061E-01
  -.1773839E-01  -.1657563E-01  -.1670151E-01  -.1674136E-01  -.1435982E-01
  -.1004361E-01  -.6774618E-02  -.6553683E-02  -.9048929E-02  -.1334752E-01
  -.1948434E-01  -.2724884E-01  -.3472681E-01  -.3956616E-01  -.4066158E-01
  -.3801062E-01  -.3219110E-01  -.2498020E-01  -.2056751E-01  -.2258727E-01
  -.2895385E-01  -.3310394E-01  -.3210695E-01  -.2921396E-01  -.2656223E-01
  -.2078206E-01  -.9125860E-02   .4469926E-02   .1342699E-01   .1583735E-01
   .1455950E-01   .1216381E-01   .8753056E-02   .3281526E-02  -.5556221E-02
  -.1820988E-01  -.3234177E-01  -.4241185E-01  -.4345809E-01  -.3595177E-01
  -.2548514E-01  -.1789572E-01  -.1504130E-01  -.1482032E-01  -.1396796E-01
  -.1010018E-01  -.2750044E-02   .6515204E-02   .1505606E-01   .2053309E-01
   .2221533E-01   .2101420E-01   .1820913E-01   .1391319E-01   .7247002E-02
  -.1302704E-02  -.9009207E-02  -.1279763E-01  -.1127431E-01  -.5616239E-02
   .1284534E-02   .6334516E-02   .7976914E-02   .7288852E-02   .6839007E-02
   .7800262E-02   .8574394E-02   .7264460E-02   .4151340E-02   .7608082E-03
  -.2552939E-02  -.6410360E-02  -.1076778E-01  -.1450371E-01  -.1610232E-01
  -.1432195E-01  -.9204458E-02  -.2902941E-02   .1761711E-02   .4073535E-02
   .5752358E-02   .8696361E-02   .1307876E-01   .1772808E-01   .2114140E-01
   .2212662E-01   .2013414E-01   .1543188E-01   .9792555E-02   .6049025E-02
   .5438673E-02   .6013366E-02   .5450449E-02   .4599214E-02   .6346130E-02
   .1137367E-01   .1720928E-01   .2085161E-01   .2090437E-01   .1779754E-01
   .1322626E-01   .9380402E-02   .7284280E-02   .5740721E-02   .3121795E-02
  -.6104595E-03  -.4870599E-02  -.1005285E-01  -.1681043E-01  -.2430611E-01
  -.3030297E-01  -.3318869E-01  -.3334025E-01  -.3211718E-01  -.3095092E-01
  -.3103521E-01  -.3206519E-01  -.3097273E-01  -.2391467E-01  -.1086524E-01
   .2845866E-02   .1006317E-01   .7050058E-02  -.4341893E-02  -.1839949E-01
  -.2893775E-01  -.3276321E-01  -.3164449E-01  -.3033916E-01  -.3145739E-01
  -.3231849E-01  -.2797292E-01  -.1760175E-01  -.6607839E-02  -.1312205E-02
  -.3237514E-02  -.9560385E-02  -.1732404E-01  -.2501455E-01  -.3092007E-01
  -.3317993E-01  -.3208190E-01  -.3032410E-01  -.2909307E-01  -.2574475E-01
  -.1765954E-01  -.6543906E-02   .2856638E-02   .7856108E-02   .9229755E-02
   .8690818E-02   .6745140E-02   .2748166E-02  -.3693363E-02  -.1118105E-01
  -.1664415E-01  -.1775356E-01  -.1468438E-01  -.9543174E-02  -.4205156E-02
   .1062590E-02   .6870941E-02   .1324571E-01   .1922955E-01   .2331213E-01
   .2478348E-01   .2494359E-01   .2634412E-01   .3059702E-01   .3679549E-01
   .4135412E-01   .4017295E-01   .3205401E-01   .2040821E-01   .1084932E-01
   .6194425E-02   .4136869E-02   .5139943E-03  -.4598524E-02  -.6104826E-02
  -.8140743E-03   .7146627E-02   .1049863E-01   .8048405E-02   .5665166E-02
   .7776381E-02   .1144693E-01   .1038147E-01   .2983297E-02  -.6185997E-02
  -.1175012E-01  -.1189816E-01  -.8276283E-02  -.3841400E-02  -.1319449E-02
  -.1724368E-02  -.4238622E-02  -.7154578E-02  -.8278840E-02  -.5448458E-02
   .1930546E-02   .1205910E-01   .2188115E-01   .2836781E-01   .2909805E-01
   .2367175E-01   .1505411E-01   .8184857E-02   .6000408E-02   .6655969E-02
   .5566747E-02   .1120309E-02  -.2782160E-02  -.1372800E-02   .5689733E-02
   .1564675E-01   .2603739E-01   .3363121E-01   .3484724E-01   .3183985E-01
   .3239787E-01   .3904530E-01   .4564852E-01   .4833322E-01   .4993986E-01
   .5039427E-01   .4447397E-01   .3354504E-01   .2762648E-01   .3074054E-01
   .3438517E-01   .3078297E-01   .2358540E-01   .2011761E-01   .2000386E-01
   .1788362E-01   .1332573E-01   .1132654E-01   .1426548E-01   .1806539E-01
   .1785545E-01   .1397106E-01   .9749833E-02   .6076420E-02   .1504995E-02
  -.3639817E-02  -.6836306E-02  -.6012935E-02  -.1187366E-02   .5849230E-02
   .1307941E-01   .1952668E-01   .2569603E-01   .3200755E-01   .3732889E-01
   .4033427E-01   .4212751E-01   .4505259E-01   .4877259E-01   .5016882E-01
   .4754122E-01   .4287633E-01   .3906775E-01   .3692377E-01   .3570257E-01
   .3491212E-01   .3425240E-01   .3263619E-01   .2918809E-01   .2495011E-01
   .2219710E-01   .2157759E-01   .2060221E-01   .1642504E-01   .9922383E-02
   .5115039E-02   .4672230E-02   .8172958E-02   .1497618E-01   .2472868E-01
   .3404530E-01   .3805558E-01   .3711097E-01   .3752092E-01   .4352893E-01
   .5146704E-01   .5345871E-01   .4618303E-01   .3519449E-01   .2916994E-01
   .2992917E-01   .3054126E-01   .2525978E-01   .1824678E-01   .1733855E-01
   .2194458E-01   .2410962E-01   .2042222E-01   .1603137E-01   .1583311E-01
   .1792622E-01   .1848433E-01   .1844675E-01   .2089051E-01   .2398343E-01
   .2227948E-01   .1443290E-01   .5285400E-02  -.7699473E-03  -.4703968E-02
  -.9368285E-02  -.1470234E-01  -.1849676E-01  -.1985663E-01  -.1964362E-01
  -.1816933E-01  -.1463581E-01  -.8782192E-02  -.1670512E-02   .4560275E-02
   .7874606E-02   .7745300E-02   .5320199E-02   .2279666E-02  -.4304994E-03
  -.2494719E-02  -.3141283E-02  -.1028561E-02   .3985019E-02   .9360392E-02
   .1106452E-01   .7303119E-02   .9531634E-03  -.3356965E-02  -.4107840E-02
  -.3340864E-02  -.3012795E-02  -.3333230E-02  -.5140241E-02  -.9905646E-02
  -.1568005E-01  -.1847165E-01  -.1978037E-01  -.2618899E-01  -.3820945E-01
  -.4633971E-01  -.4245034E-01  -.2990338E-01  -.1798866E-01  -.1072272E-01
  -.5067871E-02   .2501937E-02   .1098656E-01   .1625631E-01   .1536041E-01
   .8930339E-02   .1033275E-03  -.8724973E-02  -.1775682E-01  -.2787498E-01
  -.3716539E-01  -.4152280E-01  -.3931196E-01  -.3361630E-01  -.2862703E-01
  -.2503070E-01  -.2047374E-01  -.1363657E-01  -.5999894E-02   .2129594E-03
   .4049049E-02   .5710500E-02   .5340172E-02   .2522918E-02  -.2762214E-02
  -.9247039E-02  -.1536179E-01  -.1997907E-01  -.2273491E-01  -.2405392E-01
  -.2393900E-01  -.2137109E-01  -.1549304E-01  -.7198009E-02   .1148110E-02
   .7971310E-02   .1381535E-01   .1973728E-01   .2554008E-01   .2975602E-01
   .3113410E-01   .2987331E-01   .2740242E-01   .2502717E-01   .2296757E-01
   .2051432E-01   .1703572E-01   .1260841E-01   .7955781E-02   .4911220E-02
   .5945033E-02   .1202023E-01   .2060403E-01   .2775085E-01   .3246704E-01
   .3741614E-01   .4444212E-01   .5054718E-01   .5024707E-01   .4164425E-01
   .2867364E-01   .1707050E-01   .9219543E-02   .4178729E-02   .9908721E-03
  -.3461115E-04   .1486843E-02   .5721792E-02   .1334966E-01   .2466754E-01
   .3779418E-01   .4849688E-01   .5238805E-01   .4802904E-01   .3869876E-01
   .2995041E-01   .2475124E-01   .2182920E-01   .1876559E-01   .1504126E-01
   .1141959E-01   .8201929E-02   .5299734E-02   .3389957E-02   .4129349E-02
   .8996373E-02   .1736129E-01   .2594323E-01   .3069670E-01   .3007271E-01
   .2667312E-01   .2495063E-01   .2670392E-01   .2961686E-01   .3037076E-01
   .2811699E-01   .2478332E-01   .2235433E-01   .2075466E-01   .1891297E-01
   .1687221E-01   .1568854E-01   .1499258E-01   .1306477E-01   .1032398E-01
   .9717392E-02   .1202117E-01   .1399794E-01   .1343937E-01   .1311465E-01
   .1677050E-01   .2306586E-01   .2747740E-01   .2814107E-01   .2668062E-01
   .2522895E-01   .2481004E-01   .2605855E-01   .2895301E-01   .3188473E-01
   .3282405E-01   .3174599E-01   .3054907E-01   .3047933E-01   .3049617E-01
   .2845264E-01   .2398834E-01   .1960199E-01   .1850177E-01   .2138645E-01
   .2539414E-01   .2684611E-01   .2513792E-01   .2278029E-01   .2224266E-01
   .2348191E-01   .2430066E-01   .2257296E-01   .1791528E-01   .1188417E-01
   .6536374E-02   .2861317E-02   .7521483E-03   .3290765E-04   .5486493E-03
   .1709786E-02   .3043938E-02   .4652289E-02   .6512435E-02   .7939756E-02
   .8187362E-02   .7295073E-02   .5844765E-02   .4468055E-02   .3369500E-02
   .2392982E-02   .1100890E-02  -.7810036E-03  -.2624550E-02  -.3015080E-02
  -.1035160E-02   .2967004E-02   .7524543E-02   .1048669E-01   .1011954E-01
   .6481232E-02   .1306559E-02  -.3710327E-02  -.7908531E-02  -.1094416E-01
  -.1233006E-01  -.1230920E-01  -.1199712E-01  -.1245787E-01  -.1386584E-01
  -.1550787E-01  -.1600414E-01  -.1420492E-01  -.1056181E-01  -.7188285E-02
  -.5887252E-02  -.6798485E-02  -.9472817E-02  -.1355052E-01  -.1847198E-01
  -.2326415E-01  -.2688974E-01  -.2870496E-01  -.2849781E-01  -.2615804E-01
  -.2243229E-01  -.1970531E-01  -.2067068E-01  -.2572270E-01  -.3262298E-01
  -.3840065E-01  -.4096398E-01  -.3958078E-01  -.3548602E-01  -.3165247E-01
  -.3086958E-01  -.3341734E-01  -.3616647E-01  -.3425370E-01  -.2547204E-01
  -.1508966E-01  -.1350828E-01  -.2502981E-01  -.4081778E-01  -.4816564E-01
  -.4530030E-01  -.4070629E-01  -.3908392E-01  -.3733792E-01  -.3520792E-01
  -.3754234E-01  -.4256317E-01  -.4136213E-01  -.3304422E-01  -.2823716E-01
  -.3306725E-01  -.4082396E-01  -.4365473E-01  -.4255509E-01  -.4168516E-01
  -.4076900E-01  -.3847816E-01  -.3727552E-01  -.3954147E-01  -.4262718E-01
  -.4206948E-01  -.3792211E-01  -.3441844E-01  -.3454330E-01  -.3719261E-01
  -.3860935E-01  -.3582857E-01  -.2958909E-01  -.2382264E-01  -.2220585E-01
  -.2534340E-01  -.3038291E-01  -.3270506E-01  -.2919262E-01  -.2151265E-01
  -.1519253E-01  -.1419968E-01  -.1701189E-01  -.1835380E-01  -.1489924E-01
  -.8855191E-02  -.5651729E-02  -.8458863E-02  -.1526579E-01  -.2071347E-01
  -.2020328E-01  -.1293851E-01  -.1723572E-02   .8891504E-02   .1389197E-01
   .1028017E-01   .3619521E-03  -.8271961E-02  -.8738406E-02  -.1763895E-02
   .5207580E-02   .5977183E-02   .1271794E-02  -.3877422E-02  -.5785824E-02
  -.2920117E-02   .5635369E-02   .1829978E-01   .2862047E-01   .2996539E-01
   .2313474E-01   .1501786E-01   .1057982E-01   .9754587E-02   .1088950E-01
   .1248677E-01   .1086495E-01   .1910976E-02  -.1167890E-01  -.2022160E-01
  -.1778266E-01  -.9695499E-02  -.5953576E-02  -.9024787E-02  -.1168791E-01
  -.6970128E-02   .2937714E-02   .1029017E-01   .1141710E-01   .9316266E-02
   .7227739E-02   .3379136E-02  -.4812216E-02  -.1411207E-01  -.1846907E-01
  -.1741984E-01  -.1625881E-01  -.1743624E-01  -.1734447E-01  -.1289694E-01
  -.5477675E-02   .2543974E-02   .1090158E-01   .1964226E-01   .2661006E-01
   .2870651E-01   .2516334E-01   .1853036E-01   .1239274E-01   .8857897E-02
   .8128656E-02   .9182037E-02   .1019837E-01   .9992204E-02   .9092572E-02
   .9507741E-02   .1300269E-01   .1910691E-01   .2517846E-01   .2848895E-01
   .2798796E-01   .2442020E-01   .1877454E-01   .1197035E-01   .5471209E-02
   .7373257E-03  -.1940000E-02  -.4236452E-02  -.8701325E-02  -.1691229E-01
  -.2814850E-01  -.3929968E-01  -.4648985E-01  -.4754938E-01  -.4360908E-01
  -.3766517E-01  -.3158183E-01  -.2535822E-01  -.1891589E-01  -.1306332E-01
  -.8285147E-02  -.3613064E-02   .2054862E-02   .7319016E-02   .9054545E-02
   .6407816E-02   .2435096E-02   .6406671E-03   .1346945E-02   .2816703E-02
   .4501543E-02   .7140080E-02   .1041448E-01   .1308985E-01   .1473767E-01
   .1593773E-01   .1660814E-01   .1588072E-01   .1444888E-01   .1463752E-01
   .1684158E-01   .1731398E-01   .1220327E-01   .3360651E-02  -.2844584E-02
  -.2672790E-02   .8071504E-03   .2578582E-02   .2532815E-02   .3836032E-02
   .6033323E-02   .5164551E-02   .1962523E-02   .4112655E-02   .1531653E-01
   .2594914E-01   .2147630E-01   .9726833E-03  -.1827449E-01  -.1871868E-01
  -.2682684E-02   .1122608E-01   .1041448E-01  -.8858904E-05  -.7555584E-02
  -.5185621E-02   .6573340E-02   .2170108E-01   .3128747E-01   .2990005E-01
   .2062621E-01   .1085845E-01   .4418903E-02   .8203988E-03  -.1193827E-02
  -.3240920E-02  -.8268081E-02  -.1740936E-01  -.2605741E-01  -.2763612E-01
  -.2155234E-01  -.1436037E-01  -.1213484E-01  -.1424749E-01  -.1609435E-01
  -.1536817E-01  -.1301612E-01  -.1014837E-01  -.6828078E-02  -.3958230E-02
  -.3211100E-02  -.4700710E-02  -.6689398E-02  -.7967287E-02  -.9350060E-02
  -.1219874E-01  -.1660571E-01  -.2095291E-01  -.2238756E-01  -.1896609E-01
  -.1180266E-01  -.4415402E-02   .4825639E-03   .3058674E-02   .4348552E-02
   .3184306E-02  -.2627204E-02  -.1223830E-01  -.2132044E-01  -.2576466E-01
  -.2449120E-01  -.1906875E-01  -.1237117E-01  -.7374980E-02  -.5384573E-02
  -.4765326E-02  -.2517708E-02   .2150103E-02   .6474170E-02   .6827996E-02
   .2301174E-02  -.4351947E-02  -.8316254E-02  -.5687304E-02   .3458770E-02
   .1373526E-01   .1717360E-01   .1077618E-01   .1559986E-02   .3735880E-03
   .9568064E-02   .2007116E-01   .2258287E-01   .1732837E-01   .1028065E-01
   .4262760E-02  -.1701329E-02  -.6921572E-02  -.8722747E-02  -.7556450E-02
  -.7262314E-02  -.9069730E-02  -.9635283E-02  -.6504198E-02  -.1955733E-02
   .3511588E-03  -.1605871E-03  -.1663174E-02  -.2649414E-02  -.2451223E-02
  -.9204830E-03   .1335300E-02   .3044084E-02   .3054197E-02   .1192450E-02
  -.1463751E-02  -.3255594E-02  -.2623441E-02   .1117646E-02   .7026614E-02
   .1260038E-01   .1547594E-01   .1566256E-01   .1548084E-01   .1659597E-01
   .1768411E-01   .1639560E-01   .1277760E-01   .9305060E-02   .7452769E-02
   .5943853E-02   .2940323E-02  -.1305551E-02  -.4934191E-02  -.6772063E-02
  -.7351601E-02  -.7883922E-02  -.8950712E-02  -.1032091E-01  -.1153065E-01
  -.1245218E-01  -.1340505E-01  -.1465529E-01  -.1597175E-01  -.1668637E-01
  -.1638870E-01  -.1559524E-01  -.1581261E-01  -.1822595E-01  -.2194928E-01
  -.2441733E-01  -.2424900E-01  -.2277293E-01  -.2250770E-01  -.2495708E-01
  -.2967148E-01  -.3441372E-01  -.3637536E-01  -.3488228E-01  -.3322335E-01
  -.3580692E-01  -.4222930E-01  -.4642208E-01  -.4319940E-01  -.3450547E-01
  -.2692399E-01  -.2395289E-01  -.2339697E-01  -.2184861E-01  -.1846463E-01
  -.1408259E-01  -.1010193E-01  -.9400690E-02  -.1557339E-01  -.2814746E-01
  -.4045138E-01  -.4544072E-01  -.4280370E-01  -.3819677E-01  -.3633518E-01
  -.3740374E-01  -.3953399E-01  -.4148861E-01  -.4217979E-01  -.3989541E-01
  -.3420236E-01  -.2739647E-01  -.2330207E-01  -.2386589E-01  -.2633630E-01
  -.2522731E-01  -.1814838E-01  -.9193580E-02  -.4826931E-02  -.7139143E-02
  -.1302703E-01  -.1885783E-01  -.2389016E-01  -.2881061E-01  -.3262522E-01
  -.3348597E-01  -.3162755E-01  -.2950957E-01  -.2861370E-01  -.2789022E-01
  -.2593483E-01  -.2298968E-01  -.2017356E-01  -.1746424E-01  -.1383468E-01
  -.9064037E-02  -.4712438E-02  -.3062812E-02  -.4840231E-02  -.8356475E-02
  -.1076727E-01  -.1044909E-01  -.8197922E-02  -.5813441E-02  -.4240277E-02
  -.2838713E-02  -.6797749E-03   .2332085E-02   .5693340E-02   .8347835E-02
   .8919335E-02   .6702366E-02   .2790408E-02  -.4674648E-03  -.1012434E-02
   .1531664E-02   .5300974E-02   .7740921E-02   .7811865E-02   .6666495E-02
   .6477703E-02   .8230892E-02   .1087744E-01   .1294037E-01   .1416995E-01
   .1540177E-01   .1732296E-01   .1974159E-01   .2242654E-01   .2549365E-01
   .2838855E-01   .2944094E-01   .2685010E-01   .2024708E-01   .1119362E-01
   .2371270E-02  -.3426808E-02  -.4229469E-02   .1906143E-03   .7929140E-02
   .1548546E-01   .1977732E-01   .1997706E-01   .1752156E-01   .1443569E-01
   .1176850E-01   .9713532E-02   .8122736E-02   .6199712E-02   .3349882E-02
   .8301976E-03   .1307748E-02   .5724568E-02   .1125159E-01   .1412908E-01
   .1390030E-01   .1315989E-01   .1375723E-01   .1456726E-01   .1349102E-01
   .1007743E-01   .5867875E-02   .2822711E-02   .1530169E-02   .6235081E-03
  -.1405472E-02  -.3899403E-02  -.4579227E-02  -.2362287E-02   .8031986E-03
   .2013862E-02   .1208955E-02   .8036319E-03   .1625315E-02   .1600790E-02
  -.6659315E-03  -.2811493E-02  -.1310421E-02   .3743853E-02   .8772121E-02
   .1135917E-01   .1206957E-01   .1199061E-01   .1112841E-01   .9743946E-02
   .9186280E-02   .1050292E-01   .1293821E-01   .1524470E-01   .1732765E-01
   .1947156E-01   .2106093E-01   .2091187E-01   .1860397E-01   .1484871E-01
   .1032429E-01   .5152207E-02   .4463405E-05  -.3587852E-02  -.4277076E-02
  -.2371200E-02   .4380108E-03   .2411294E-02   .2914996E-02   .2521804E-02
   .2394229E-02   .3507955E-02   .5986165E-02   .8904996E-02   .1117244E-01
   .1288559E-01   .1497097E-01   .1745767E-01   .1853696E-01   .1566679E-01
   .8097846E-02  -.1944985E-02  -.1102410E-01  -.1705623E-01  -.1995311E-01
  -.2063211E-01  -.1964429E-01  -.1680474E-01  -.1207427E-01  -.6535940E-02
  -.2149316E-02  -.2788903E-03  -.5449816E-03  -.1688670E-02  -.3281628E-02
  -.5879918E-02  -.9701677E-02  -.1321903E-01  -.1389257E-01  -.1078327E-01
  -.5786269E-02  -.1782127E-02   .1948405E-03   .1318059E-02   .2722767E-02
   .4137876E-02   .4488805E-02   .3586681E-02   .2163497E-02   .6806781E-03
  -.8968250E-03  -.2772708E-02  -.4735657E-02  -.5505795E-02  -.3253643E-02
   .2402058E-02   .8450295E-02   .1037850E-01   .7597860E-02   .5181821E-02
   .7907150E-02   .1438819E-01   .1890458E-01   .1815479E-01   .1438120E-01
   .1188098E-01   .1246482E-01   .1487330E-01   .1696154E-01   .1729876E-01
   .1560166E-01   .1335197E-01   .1332349E-01   .1685774E-01   .2154890E-01
   .2378241E-01   .2309895E-01   .2172370E-01   .2064592E-01   .1914673E-01
   .1741864E-01   .1708886E-01   .1844702E-01   .1984070E-01   .2104336E-01
   .2454656E-01   .3167799E-01   .3949396E-01   .4376970E-01   .4411098E-01
   .4391292E-01   .4533987E-01   .4651002E-01   .4416711E-01   .3782317E-01
   .3040694E-01   .2551001E-01   .2443768E-01   .2580964E-01   .2702004E-01
   .2638497E-01   .2470771E-01   .2453079E-01   .2730391E-01   .3152031E-01
   .3416181E-01   .3444247E-01   .3435971E-01   .3501313E-01   .3544569E-01
   .3496713E-01   .3456181E-01   .3489467E-01   .3470122E-01   .3220326E-01
   .2742734E-01   .2246532E-01   .1935000E-01   .1836171E-01   .1819012E-01
   .1757260E-01   .1662720E-01   .1613154E-01   .1606168E-01   .1556234E-01
   .1413612E-01   .1212934E-01   .9904177E-02   .7127462E-02   .3749859E-02
   .9019437E-03  -.3510668E-03  -.5530258E-03  -.7833463E-03  -.1165693E-02
  -.1518389E-02  -.2676486E-02  -.5598771E-02  -.9431753E-02  -.1235647E-01
  -.1430202E-01  -.1691548E-01  -.2029914E-01  -.2197714E-01  -.1997107E-01
  -.1570183E-01  -.1247900E-01  -.1125621E-01  -.9756402E-02  -.6095758E-02
  -.1571910E-02   .9524073E-03   .3494500E-03  -.1490945E-02  -.2006112E-02
  -.1097483E-02  -.7972372E-03  -.2574754E-02  -.5694630E-02  -.8264798E-02
  -.9029607E-02  -.8026701E-02  -.6702672E-02  -.7182188E-02  -.1030087E-01
  -.1454339E-01  -.1810201E-01  -.2079608E-01  -.2390660E-01  -.2841853E-01
  -.3360422E-01  -.3761072E-01  -.3882665E-01  -.3686707E-01  -.3224891E-01
  -.2606556E-01  -.1975854E-01  -.1485313E-01  -.1259190E-01  -.1335215E-01
  -.1620388E-01  -.1913925E-01  -.2073184E-01  -.2134210E-01  -.2201681E-01
  -.2277697E-01  -.2230686E-01  -.1940956E-01  -.1462190E-01  -.1016903E-01
  -.8619543E-02  -.1105074E-01  -.1632195E-01  -.2237635E-01  -.2761327E-01
  -.3128421E-01  -.3313953E-01  -.3298663E-01  -.3092199E-01  -.2736284E-01
  -.2301180E-01  -.1889457E-01  -.1611839E-01  -.1555819E-01  -.1749680E-01
  -.2171893E-01  -.2779669E-01  -.3448198E-01  -.3940296E-01  -.4068398E-01
  -.3830073E-01  -.3365058E-01  -.2851927E-01  -.2416185E-01  -.2091086E-01
  -.1848797E-01  -.1659224E-01  -.1532652E-01  -.1474032E-01  -.1465199E-01
  -.1462720E-01  -.1418697E-01  -.1315018E-01  -.1162649E-01  -.9605249E-02
  -.6923679E-02  -.3858283E-02  -.1802737E-02  -.2138504E-02  -.4558813E-02
  -.7243160E-02  -.8745962E-02  -.9525295E-02  -.1071468E-01  -.1205577E-01
  -.1210554E-01  -.9837185E-02  -.5574178E-02  -.8324819E-03   .2599804E-02
   .3766112E-02   .2749886E-02   .4577687E-03  -.2197154E-02  -.4805467E-02
  -.6765014E-02  -.6734355E-02  -.3856525E-02   .6354285E-03   .4048069E-02
   .5163984E-02   .5481461E-02   .6739524E-02   .8775600E-02   .1016672E-01
   .9978389E-02   .8391759E-02   .6076500E-02   .3632356E-02   .1898083E-02
   .1606267E-02   .2018273E-02   .1312638E-02  -.1174852E-02  -.3781816E-02
  -.4902530E-02  -.5318905E-02  -.6042386E-02  -.5713345E-02  -.3363895E-02
  -.1294566E-02  -.1754718E-02  -.3308781E-02  -.3589544E-02  -.3316741E-02
  -.4484503E-02  -.7232108E-02  -.1071565E-01  -.1408907E-01  -.1544508E-01
  -.1315916E-01  -.8636959E-02  -.5100334E-02  -.3075842E-02   .2607641E-04
   .5264350E-02   .1055206E-01   .1451228E-01   .1840605E-01   .2266825E-01
   .2449570E-01   .2117275E-01   .1439423E-01   .9098142E-02   .8295231E-02
   .1065146E-01   .1284789E-01   .1274039E-01   .1038076E-01   .7407472E-02
   .6267867E-02   .8728975E-02   .1364552E-01   .1754405E-01   .1795863E-01
   .1595476E-01   .1460690E-01   .1550940E-01   .1719574E-01   .1702539E-01
   .1412263E-01   .9882337E-02   .6200705E-02   .4155487E-02   .3673279E-02
   .4040628E-02   .4978549E-02   .6797496E-02   .9936308E-02   .1401197E-01
   .1810792E-01   .2151981E-01   .2394394E-01   .2497208E-01   .2414015E-01
   .2160858E-01   .1846043E-01   .1616144E-01   .1576248E-01   .1738452E-01
   .1999920E-01   .2182588E-01   .2174938E-01   .2032412E-01   .1895623E-01
   .1839534E-01   .1801079E-01   .1649522E-01   .1347294E-01   .9827353E-02
   .6493205E-02   .3794391E-02   .1765708E-02   .5188676E-03   .1796902E-03
   .6391447E-03   .1453414E-02   .2119828E-02   .2620142E-02   .3342909E-02
   .4020010E-02   .3667328E-02   .1925525E-02  -.2246975E-03  -.1520961E-02
  -.1785547E-02  -.2124381E-02  -.3446412E-02  -.4927965E-02  -.4737750E-02
  -.2417092E-02   .6972204E-03   .2645026E-02   .2166105E-02  -.3663704E-03
  -.3102739E-02  -.4298913E-02  -.4301174E-02  -.4687959E-02  -.5932832E-02
  -.6655146E-02  -.5716134E-02  -.3882089E-02  -.2554558E-02  -.1873316E-02
  -.1019321E-02   .2846241E-03   .1424474E-02   .1914019E-02   .2070543E-02
   .2432387E-02   .2668059E-02   .1859236E-02  -.3018147E-03  -.2970428E-02
  -.5266454E-02  -.7063855E-02  -.8371567E-02  -.8968257E-02  -.8949294E-02
  -.9263357E-02  -.1062898E-01  -.1217734E-01  -.1223830E-01  -.1029240E-01
  -.7211852E-02  -.3881825E-02  -.3806295E-03   .3390620E-02   .7041400E-02
   .9783749E-02   .1111184E-01   .1124058E-01   .1066713E-01   .9544065E-02
   .8007104E-02   .6277225E-02   .4373553E-02   .2512869E-02   .1189957E-02
   .5300325E-03  -.1423423E-03  -.1678871E-02  -.4238030E-02  -.7304641E-02
  -.1024388E-01  -.1278552E-01  -.1492688E-01  -.1623867E-01  -.1579722E-01
  -.1312036E-01  -.9177901E-02  -.5977097E-02  -.4712511E-02  -.4705555E-02
  -.4939474E-02  -.5615102E-02  -.7395714E-02  -.9812667E-02  -.1165222E-01
  -.1254099E-01  -.1279385E-01  -.1180138E-01  -.8071970E-02  -.1732188E-02
   .4685064E-02   .8758288E-02   .1037530E-01   .1057149E-01   .9809127E-02
   .7861228E-02   .4700340E-02   .8195056E-03  -.3307391E-02  -.7119581E-02
  -.1004661E-01  -.1232392E-01  -.1449298E-01  -.1582477E-01  -.1482833E-01
  -.1149014E-01  -.7955835E-02  -.6018888E-02  -.5063933E-02  -.3451614E-02
  -.1113658E-02   .4404794E-03   .2903214E-03  -.8367489E-03  -.1710186E-02
  -.2005641E-02  -.1907840E-02  -.1347398E-02  -.1624931E-03   .1259911E-02
   .2335787E-02   .3171191E-02   .4389844E-02   .6017738E-02   .7059351E-02
   .6383276E-02   .3966398E-02   .1127093E-02  -.7354784E-03  -.1185543E-02
  -.8958830E-03  -.7470689E-03  -.1310246E-02  -.2976110E-02  -.5735345E-02
  -.8495154E-02  -.9738082E-02  -.9054084E-02  -.7582692E-02  -.6767735E-02
  -.6782523E-02  -.6339506E-02  -.4027159E-02  -.3761543E-03   .2216678E-02
   .2259048E-02   .8528830E-03  -.2436639E-03  -.1250164E-02  -.4266988E-02
  -.1000675E-01  -.1620550E-01  -.2013892E-01  -.2115268E-01  -.2044877E-01
  -.1935490E-01  -.1832783E-01  -.1723766E-01  -.1580504E-01  -.1393745E-01
  -.1218247E-01  -.1177849E-01  -.1339973E-01  -.1617725E-01  -.1846942E-01
  -.1928515E-01  -.1875361E-01  -.1733897E-01  -.1529733E-01  -.1278181E-01
  -.1000409E-01  -.7440091E-02  -.5832390E-02  -.5749730E-02  -.7232970E-02
  -.9562700E-02  -.1161226E-01  -.1284417E-01  -.1371668E-01  -.1489082E-01
  -.1603369E-01  -.1581337E-01  -.1337584E-01  -.9530176E-02  -.6196278E-02
  -.4923632E-02  -.5833452E-02  -.7758222E-02  -.9565699E-02  -.1110185E-01
  -.1269846E-01  -.1406319E-01  -.1411655E-01  -.1207013E-01  -.8348364E-02
  -.4309318E-02  -.1450137E-02  -.4654945E-03  -.1180219E-02  -.3091715E-02
  -.5711868E-02  -.8567880E-02  -.1110428E-01  -.1258338E-01  -.1224376E-01
  -.9888695E-02  -.6447600E-02  -.3681063E-02  -.3004588E-02  -.4558759E-02
  -.7461247E-02  -.1083028E-01  -.1419050E-01  -.1685706E-01  -.1818142E-01
  -.1831117E-01  -.1785346E-01  -.1670270E-01  -.1398149E-01  -.9174177E-02
  -.2982016E-02   .2889584E-02   .6604706E-02   .6844866E-02   .3685018E-02
  -.1095635E-02  -.5197775E-02  -.7708793E-02  -.9534753E-02  -.1123154E-01
  -.1181927E-01  -.1010314E-01  -.6449296E-02  -.2284831E-02   .1276777E-02
   .3539267E-02   .3779174E-02   .1876630E-02  -.9129775E-03  -.3142957E-02
  -.4769366E-02  -.6915486E-02  -.1008607E-01  -.1331421E-01  -.1556025E-01
  -.1660141E-01  -.1627425E-01  -.1422934E-01  -.1062930E-01  -.6556645E-02
  -.3448050E-02  -.1947452E-02  -.1290051E-02  -.6358451E-03  -.3466655E-03
  -.1319797E-02  -.3345553E-02  -.4862077E-02  -.4387513E-02  -.2068786E-02
   .3074047E-03   .9727585E-03  -.6505448E-04  -.1073865E-02  -.3965183E-03
   .1788666E-02   .3528534E-02   .3564265E-02   .3073336E-02   .4528465E-02
   .8932935E-02   .1435415E-01   .1780558E-01   .1788505E-01   .1568912E-01
   .1317065E-01   .1099777E-01   .8410993E-02   .4700693E-02   .4254013E-03
  -.2858510E-02  -.3919330E-02  -.2316297E-02   .1542804E-02   .6176390E-02
   .9465841E-02   .1036031E-01   .1012281E-01   .1017992E-01   .1021157E-01
   .9374211E-02   .7899953E-02   .6891066E-02   .7033949E-02   .8156203E-02
   .9742184E-02   .1135626E-01   .1282745E-01   .1394806E-01   .1444014E-01
   .1439557E-01   .1421740E-01   .1403753E-01   .1357376E-01   .1240811E-01
   .1055842E-01   .8718546E-02   .7779934E-02   .7758686E-02   .7911472E-02
   .7869948E-02   .8237162E-02   .9690418E-02   .1177510E-01   .1341530E-01
   .1421330E-01   .1455409E-01   .1452999E-01   .1341417E-01   .1047620E-01
   .6131167E-02   .1749190E-02  -.1621334E-02  -.3759460E-02  -.4491710E-02
  -.3622327E-02  -.1913119E-02  -.9859414E-03  -.1415976E-02  -.1321690E-02
   .1538395E-02   .6189477E-02   .9070586E-02   .8280134E-02   .6012444E-02
   .5781860E-02   .8599668E-02   .1247286E-01   .1496791E-01   .1567008E-01
   .1555924E-01   .1534625E-01   .1527033E-01   .1555748E-01   .1592517E-01
   .1550856E-01   .1387067E-01   .1222861E-01   .1221164E-01   .1339824E-01
   .1396567E-01   .1317396E-01   .1192457E-01   .1093142E-01   .9570607E-02
   .7232732E-02   .4787135E-02   .3777657E-02   .4712620E-02   .6862257E-02
   .9500459E-02   .1208998E-01   .1367273E-01   .1334701E-01   .1109328E-01
   .7471437E-02   .3391238E-02  -.1501256E-03  -.2396858E-02  -.3012449E-02
  -.2131961E-02  -.3211058E-03   .1374083E-02   .2063474E-02   .1812231E-02
   .1786436E-02   .2609068E-02   .3405186E-02   .2956392E-02   .1163743E-02
  -.9095137E-03  -.2103483E-02  -.1989682E-02  -.9152645E-03   .2518329E-03
   .8894139E-03   .8181377E-03  -.4713641E-03  -.3954986E-02  -.9577905E-02
  -.1481491E-01  -.1687209E-01  -.1691511E-01  -.1887967E-01  -.2291716E-01
  -.2434927E-01  -.2079208E-01  -.1553214E-01  -.1170018E-01  -.8007809E-02
  -.2680275E-02   .2242100E-02   .3964682E-02   .2792846E-02   .5665391E-03
  -.2188617E-02  -.5352449E-02  -.7615454E-02  -.8331166E-02  -.9369695E-02
  -.1219882E-01  -.1470164E-01  -.1396185E-01  -.1064187E-01  -.8332882E-02
  -.8841096E-02  -.1059140E-01  -.1127437E-01  -.1018645E-01  -.7882511E-02
  -.5426679E-02  -.4124970E-02  -.4483476E-02  -.5287083E-02  -.4875709E-02
  -.3247488E-02  -.1991931E-02  -.2461734E-02  -.4277248E-02  -.5256035E-02
  -.3700187E-02  -.7346419E-03   .5842396E-03  -.9621172E-03  -.3354973E-02
  -.4385308E-02  -.4527760E-02  -.5938805E-02  -.9446467E-02  -.1325874E-01
  -.1437487E-01  -.1133590E-01  -.5636476E-02  -.2518793E-03   .3137105E-02
   .4838492E-02   .5222918E-02   .4255000E-02   .2553137E-02   .1566425E-02
   .2009077E-02   .2997091E-02   .3448266E-02   .3731952E-02   .5009406E-02
   .7598859E-02   .1074706E-01   .1332993E-01   .1417088E-01   .1239978E-01
   .8572223E-02   .4718317E-02   .2636178E-02   .2671541E-02   .3910302E-02
   .5298849E-02   .6402285E-02   .7276228E-02   .8008149E-02   .8699194E-02
   .9557221E-02   .1041158E-01   .1083729E-01   .1086417E-01   .1108608E-01
   .1177094E-01   .1229549E-01   .1163100E-01   .9558899E-02   .6948448E-02
   .5150108E-02   .4935291E-02   .5910835E-02   .7124454E-02   .7996134E-02
   .8678640E-02   .9785745E-02   .1149803E-01   .1276715E-01   .1240088E-01
   .1115189E-01   .1073890E-01   .1062042E-01   .8892144E-02   .6237365E-02
   .5854656E-02   .8990027E-02   .1309037E-01   .1564093E-01   .1663232E-01
   .1642042E-01   .1538729E-01   .1519581E-01   .1707900E-01   .1956497E-01
   .2052888E-01   .2087974E-01   .2302508E-01   .2655002E-01   .2842182E-01
   .2771693E-01   .2726455E-01   .2900559E-01   .3038391E-01   .2794987E-01
   .2228106E-01   .1675971E-01   .1324467E-01   .1152064E-01   .1173240E-01
   .1405990E-01   .1717085E-01   .1932882E-01   .2025505E-01   .2083689E-01
   .2138046E-01   .2101475E-01   .1882004E-01   .1534982E-01   .1246786E-01
   .1126039E-01   .1124826E-01   .1151827E-01   .1199706E-01   .1374523E-01
   .1776485E-01   .2267263E-01   .2483369E-01   .2215558E-01   .1667046E-01
   .1255774E-01   .1191398E-01   .1342493E-01   .1459889E-01   .1424804E-01
   .1269847E-01   .1065323E-01   .9280826E-02   .1038347E-01   .1422148E-01
   .1795461E-01   .1835736E-01   .1559776E-01   .1297193E-01   .1279535E-01
   .1381092E-01   .1361879E-01   .1210218E-01   .1078975E-01   .1004691E-01
   .9026934E-02   .7242789E-02   .4922898E-02   .2087072E-02  -.1365025E-02
  -.5037686E-02  -.7997565E-02  -.9064679E-02  -.7206874E-02  -.2186472E-02
   .4539690E-02   .1072158E-01   .1491219E-01   .1710485E-01   .1805558E-01
   .1816663E-01   .1716519E-01   .1449755E-01   .1004525E-01   .4605035E-02
  -.3807843E-03  -.3657428E-02  -.4684485E-02  -.3920218E-02  -.2337696E-02
  -.2604872E-03   .2480088E-02   .5432173E-02   .7627766E-02   .8594562E-02
   .8899756E-02   .9449518E-02   .1041165E-01   .1099283E-01   .1052834E-01
   .9077234E-02   .7104271E-02   .5124573E-02   .3417777E-02   .1877154E-02
   .9443618E-03   .2036084E-02   .5428999E-02   .8437024E-02   .8458972E-02
   .6533361E-02   .5425425E-02   .5910888E-02   .6404361E-02   .5408314E-02
   .3099542E-02   .6806652E-03  -.8617204E-03  -.1606388E-02  -.2459684E-02
  -.3813718E-02  -.4917406E-02  -.5093754E-02  -.4668661E-02  -.4261271E-02
  -.3768657E-02  -.2952109E-02  -.1979859E-02  -.1092319E-02  -.1423655E-03
   .1174262E-02   .2536832E-02   .2905218E-02   .1595662E-02  -.9571295E-03
  -.4050905E-02  -.7217229E-02  -.9773828E-02  -.1072944E-01  -.9287949E-02
  -.5611898E-02  -.6564420E-03   .4746500E-02   .9631040E-02   .1258461E-01
   .1257892E-01   .1032477E-01   .8170355E-02   .7533282E-02   .7277543E-02
   .5535498E-02   .2276789E-02  -.6673574E-03  -.1869446E-02  -.1598323E-02
  -.8301515E-03  -.2098640E-03  -.6262297E-04  -.5987533E-03  -.1809740E-02
  -.3149047E-02  -.4315936E-02  -.5943156E-02  -.8796659E-02  -.1225550E-01
  -.1446641E-01  -.1458810E-01  -.1401297E-01  -.1452736E-01  -.1609252E-01
  -.1737763E-01  -.1773656E-01  -.1749195E-01  -.1705278E-01  -.1662801E-01
  -.1637389E-01  -.1607962E-01  -.1483436E-01  -.1184960E-01  -.7520195E-02
  -.3190174E-02  -.1014315E-03   .9368741E-03  -.3203669E-05  -.1753554E-02
  -.2934370E-02  -.3018887E-02  -.2664219E-02  -.2275108E-02  -.1397585E-02
  -.5174309E-04   .8137671E-03   .7759282E-03   .7244348E-03   .1594304E-02
   .3025829E-02   .3937746E-02   .3835401E-02   .2940680E-02   .1492734E-02
  -.4538738E-03  -.2895326E-02  -.5896031E-02  -.9575514E-02  -.1330672E-01
  -.1567304E-01  -.1566517E-01  -.1405658E-01  -.1265541E-01  -.1161835E-01
  -.9210460E-02  -.4772922E-02  -.5383398E-03   .6874186E-03  -.8867186E-03
  -.2373547E-02  -.1599327E-02   .9068902E-03   .3200747E-02   .4082270E-02
   .2937011E-02  -.9919576E-04  -.2939105E-02  -.2695428E-02   .7286101E-03
   .3592451E-02   .3090664E-02   .8123175E-03  -.3154061E-03  -.3176315E-03
  -.1299521E-02  -.3558989E-02  -.5067933E-02  -.4570899E-02  -.2787524E-02
  -.7904053E-03   .1139268E-02   .2803115E-02   .3879141E-02   .4847776E-02
   .6492553E-02   .8371047E-02   .9122161E-02   .8138277E-02   .6178859E-02
   .4712481E-02   .4882363E-02   .6622639E-02   .8759774E-02   .1033233E-01
   .1127885E-01   .1194363E-01   .1226144E-01   .1176632E-01   .1063503E-01
   .9785613E-02   .9690826E-02   .9963473E-02   .1013867E-01   .9869572E-02
   .8807579E-02   .6926054E-02   .4882824E-02   .3781294E-02   .3747515E-02
   .3783021E-02   .3272422E-02   .2769705E-02   .3210736E-02   .4940278E-02
   .7440144E-02   .9457769E-02   .9962036E-02   .8810103E-02   .6466775E-02
   .3349674E-02  -.2129650E-03  -.3500862E-02  -.5748628E-02  -.6276154E-02
  -.4672534E-02  -.1343909E-02   .2414862E-02   .5298720E-02   .7020720E-02
   .8076275E-02   .8641548E-02   .8066166E-02   .5897399E-02   .2643794E-02
  -.1868111E-03  -.6636805E-03   .1905444E-02   .6068228E-02   .9674711E-02
   .1181803E-01   .1290191E-01   .1323864E-01   .1252186E-01   .1055459E-01
   .7716203E-02   .4563140E-02   .1497021E-02  -.7814871E-03  -.1413985E-02
  -.1854471E-03   .2065356E-02   .3994715E-02   .4855134E-02   .4851449E-02
   .4405462E-02   .3753799E-02   .2895401E-02   .1641300E-02  -.1006267E-03
  -.1567298E-02  -.1299897E-02   .1160002E-02   .4724827E-02   .7661236E-02
   .9096184E-02   .9524933E-02   .9534107E-02   .9110495E-02   .8186807E-02
   .7156413E-02   .6787316E-02   .7673804E-02   .9732442E-02   .1188118E-01
   .1273941E-01   .1204539E-01   .1081807E-01   .1006016E-01   .9926192E-02
   .1007661E-01   .1043896E-01   .1086209E-01   .1079361E-01   .1023122E-01
   .9983356E-02   .1068403E-01   .1189713E-01   .1245109E-01   .1195909E-01
   .1109304E-01   .1069800E-01   .1114094E-01   .1228894E-01   .1323178E-01
   .1290476E-01   .1135211E-01   .1002770E-01   .1017725E-01   .1135017E-01
   .1218247E-01   .1196887E-01   .1115442E-01   .1061287E-01   .1069128E-01
   .1103170E-01   .1131581E-01   .1135751E-01   .1081350E-01   .9504042E-02
   .7847158E-02   .6827895E-02   .7152494E-02   .8561678E-02   .1019607E-01
   .1117603E-01   .1101465E-01   .9798082E-02   .8125113E-02   .6369063E-02
   .4012673E-02   .1229740E-03  -.5428364E-02  -.1139954E-01  -.1593515E-01
  -.1795427E-01  -.1785724E-01  -.1700574E-01  -.1647042E-01  -.1627351E-01
  -.1572116E-01  -.1418313E-01  -.1162753E-01  -.8613313E-02  -.6171727E-02
  -.5295357E-02  -.6234333E-02  -.8089454E-02  -.9850391E-02  -.1144324E-01
  -.1322071E-01  -.1513740E-01  -.1637224E-01  -.1630009E-01  -.1531505E-01
  -.1410655E-01  -.1270569E-01  -.1061664E-01  -.7767011E-02  -.5180503E-02
  -.4215510E-02  -.5276237E-02  -.7712008E-02  -.1029147E-01  -.1180809E-01
  -.1174357E-01  -.1063403E-01  -.9628157E-02  -.9543046E-02  -.1017310E-01
  -.1048446E-01  -.9466406E-02  -.7058965E-02  -.4049584E-02  -.1431748E-02
   .1807762E-03   .1022964E-02   .1748263E-02   .2281573E-02   .1965648E-02
   .4852544E-03  -.1686866E-02  -.3925011E-02  -.6156739E-02  -.8299683E-02
  -.1015338E-01  -.1143528E-01  -.1186752E-01  -.1159491E-01  -.1117333E-01
  -.1127501E-01  -.1206549E-01  -.1272798E-01  -.1179656E-01  -.8476743E-02
  -.4072370E-02  -.1172410E-02  -.1141890E-02  -.3172161E-02  -.5639625E-02
  -.7912509E-02  -.1017804E-01  -.1258249E-01  -.1457291E-01  -.1527530E-01
  -.1436226E-01  -.1231885E-01  -.1001959E-01  -.7995694E-02  -.6217709E-02
  -.4554100E-02  -.3666392E-02  -.4925923E-02  -.8316230E-02  -.1143925E-01
  -.1184608E-01  -.9503873E-02  -.6495346E-02  -.4697436E-02  -.4441219E-02
  -.4919186E-02  -.5367013E-02  -.5594343E-02  -.5652259E-02  -.5695748E-02
  -.5880040E-02  -.5992554E-02  -.5623525E-02  -.4788334E-02  -.3507064E-02
  -.1641593E-02   .3403394E-03   .1309075E-02   .3238270E-03  -.2412405E-02
  -.5663832E-02  -.8123979E-02  -.8894695E-02  -.7714016E-02  -.5288396E-02
  -.2885595E-02  -.1290953E-02  -.2386650E-03   .1026780E-02   .2135263E-02
   .1094416E-02  -.3199626E-02  -.8407872E-02  -.1056801E-01  -.9128384E-02
  -.7227428E-02  -.6279864E-02  -.4046769E-02  -.6726172E-04   .1949101E-02
   .1358679E-03  -.1595010E-02   .2467133E-03   .2240187E-02  -.8083769E-03
  -.6841339E-02  -.8811500E-02  -.4817320E-02  -.2017240E-03   .7852381E-03
   .1025993E-03   .1098994E-02   .3312376E-02   .4667299E-02   .5121722E-02
   .5287283E-02   .4383565E-02   .2469331E-02   .2066947E-02   .5030901E-02
   .9205813E-02   .1044724E-01   .7577371E-02   .3958842E-02   .3356240E-02
   .5572219E-02   .7105225E-02   .5437187E-02   .1935153E-02  -.6367951E-04
   .7186484E-03   .2477218E-02   .2669974E-02   .6267346E-03  -.2223145E-02
  -.3878006E-02  -.3648615E-02  -.2601304E-02  -.1917999E-02  -.1862467E-02
  -.1740346E-02  -.8703139E-03   .7283731E-03   .2820314E-02   .5745920E-02
   .9145761E-02   .1075321E-01   .8717376E-02   .4704445E-02   .2816254E-02
   .5185534E-02   .9422843E-02   .1109230E-01   .8233240E-02   .2609644E-02
  -.2621393E-02  -.4929272E-02  -.3928972E-02  -.2181766E-02  -.3535288E-02
  -.9020106E-02  -.1513566E-01  -.1752156E-01  -.1537837E-01  -.1140262E-01
  -.8064203E-02  -.5434281E-02  -.2643231E-02   .2298324E-03   .2026128E-02
   .1548030E-02  -.1517517E-02  -.5879587E-02  -.9391207E-02  -.1094678E-01
  -.1121201E-01  -.1143986E-01  -.1219621E-01  -.1294327E-01  -.1271568E-01
  -.1118667E-01  -.9016631E-02  -.7265674E-02  -.6631847E-02  -.7046033E-02
  -.7994817E-02  -.8810676E-02  -.9208389E-02  -.9310142E-02  -.9192026E-02
  -.8597109E-02  -.7606716E-02  -.6933661E-02  -.6920229E-02  -.6839297E-02
  -.5504740E-02  -.2889789E-02  -.3183847E-03   .1043936E-02   .1451131E-02
   .1212318E-02  -.6980380E-03  -.4627690E-02  -.8506716E-02  -.1088744E-01
  -.1301198E-01  -.1531306E-01  -.1560522E-01  -.1344785E-01  -.1230618E-01
  -.1335649E-01  -.1246074E-01  -.7512508E-02  -.3953796E-02  -.7433217E-02
  -.1481450E-01  -.1830195E-01  -.1615620E-01  -.1358092E-01  -.1378504E-01
  -.1427789E-01  -.1288889E-01  -.1162292E-01  -.1222844E-01  -.1271700E-01
  -.1104923E-01  -.8774522E-02  -.8163308E-02  -.8390017E-02  -.7333810E-02
  -.5299189E-02  -.4590816E-02  -.5679674E-02  -.6621468E-02  -.6523572E-02
  -.6831510E-02  -.8452982E-02  -.1033171E-01  -.1130300E-01  -.1149364E-01
  -.1160369E-01  -.1164972E-01  -.1086050E-01  -.8678263E-02  -.5443524E-02
  -.2257589E-02  -.1649199E-03   .4880501E-03   .1881900E-03  -.2965387E-03
  -.6888534E-03  -.1589094E-02  -.3512313E-02  -.5787841E-02  -.7098211E-02
  -.6874810E-02  -.5583825E-02  -.4321308E-02  -.3729697E-02  -.3260261E-02
  -.1885498E-02   .2157821E-04   .9423775E-03   .1928811E-03  -.1344619E-02
  -.2253893E-02  -.2076414E-02  -.1690337E-02  -.2223957E-02  -.3710343E-02
  -.5155050E-02  -.5610795E-02  -.4712782E-02  -.2872053E-02  -.8950130E-03
   .4148129E-03   .7903569E-03   .8092933E-03   .1363426E-02   .2429753E-02
   .2974707E-02   .2091749E-02   .1181550E-03  -.1827123E-02  -.3452116E-02
  -.5414819E-02  -.7687474E-02  -.9047131E-02  -.8791411E-02  -.7910869E-02
  -.7754525E-02  -.8025718E-02  -.7520918E-02  -.5993872E-02  -.4520123E-02
  -.4058528E-02  -.4509228E-02  -.5207498E-02  -.5555352E-02  -.5348606E-02
  -.5036301E-02  -.5319396E-02  -.6361391E-02  -.7620873E-02  -.8605204E-02
  -.9371875E-02  -.1018597E-01  -.1132983E-01  -.1287969E-01  -.1495727E-01
  -.1751555E-01  -.1937395E-01  -.1842129E-01  -.1397956E-01  -.8758396E-02
  -.6995193E-02  -.9528429E-02  -.1222133E-01  -.1096158E-01  -.6988050E-02
  -.5323967E-02  -.8323724E-02  -.1360254E-01  -.1791409E-01  -.1978561E-01
  -.1915683E-01  -.1715768E-01  -.1597917E-01  -.1701317E-01  -.1914788E-01
  -.2012503E-01  -.1954854E-01  -.1896074E-01  -.1906430E-01  -.1870598E-01
  -.1717846E-01  -.1586851E-01  -.1632439E-01  -.1806516E-01  -.1945803E-01
  -.2008131E-01  -.2047383E-01  -.2059404E-01  -.2004274E-01  -.1921332E-01
  -.1870002E-01  -.1803085E-01  -.1617816E-01  -.1334114E-01  -.1127717E-01
  -.1125337E-01  -.1245147E-01  -.1311965E-01  -.1265624E-01  -.1198106E-01
  -.1206063E-01  -.1279813E-01  -.1360304E-01  -.1426529E-01  -.1499165E-01
  -.1592852E-01  -.1695396E-01  -.1772453E-01  -.1796634E-01  -.1777894E-01
  -.1750952E-01  -.1728885E-01  -.1691807E-01  -.1626768E-01  -.1558496E-01
  -.1462944E-01  -.1260290E-01  -.9777332E-02  -.8021700E-02  -.7959544E-02
  -.7090753E-02  -.4117290E-02  -.2350061E-02  -.4759459E-02  -.8181007E-02
  -.7726532E-02  -.4608448E-02  -.4065056E-02  -.7125979E-02  -.9208642E-02
  -.6972984E-02  -.2627573E-02  -.6149583E-04   .3060817E-03   .2958174E-03
   .1096767E-03  -.1271197E-02  -.3406299E-02  -.4849124E-02  -.5670393E-02
  -.7298312E-02  -.1015030E-01  -.1302332E-01  -.1467637E-01  -.1508876E-01
  -.1441021E-01  -.1206027E-01  -.7701576E-02  -.2448786E-02   .1885581E-02
   .4431988E-02   .5720788E-02   .6547158E-02   .6761762E-02   .5855307E-02
   .3990187E-02   .2040923E-02   .6481533E-03  -.3374327E-03  -.1203947E-02
  -.1579197E-02  -.6981174E-03   .1378067E-02   .3451137E-02   .3877293E-02
   .2029882E-02  -.9353034E-03  -.2907334E-02  -.2325682E-02   .6418188E-03
   .4324088E-02   .7148878E-02   .8971304E-02   .1067917E-01   .1249492E-01
   .1341591E-01   .1297940E-01   .1222955E-01   .1187878E-01   .1099156E-01
   .8398493E-02   .4833043E-02   .2476653E-02   .2396644E-02   .3534636E-02
   .3932376E-02   .2705894E-02   .7170297E-03  -.4412999E-03  -.5787768E-03
  -.8789322E-03  -.1883216E-02  -.2557867E-02  -.1497867E-02   .1355192E-02
   .4873727E-02   .7967836E-02   .1026062E-01   .1218000E-01   .1414362E-01
   .1585321E-01   .1628969E-01   .1506580E-01   .1287996E-01   .1074227E-01
   .9121227E-02   .7490781E-02   .5403281E-02   .3411345E-02   .2976700E-02
   .4874716E-02   .8036512E-02   .1029183E-01   .1064673E-01   .1023574E-01
   .1040803E-01   .1135053E-01   .1239976E-01   .1265302E-01   .1102456E-01
   .6538156E-02  -.2112551E-03  -.6512988E-02  -.9692396E-02  -.9761090E-02
  -.9254674E-02  -.1038290E-01  -.1245101E-01  -.1312874E-01  -.1092326E-01
  -.5860573E-02   .1211051E-02   .8822925E-02   .1479642E-01   .1746946E-01
   .1715156E-01   .1548659E-01   .1370973E-01   .1194586E-01   .1001926E-01
   .8016240E-02   .6016208E-02   .4076963E-02   .2546112E-02   .2045944E-02
   .3137950E-02   .5483699E-02   .7428792E-02   .6638563E-02   .1819766E-02
  -.5196059E-02  -.1042172E-01  -.1137186E-01  -.9527862E-02  -.8370619E-02
  -.9225217E-02  -.1022456E-01  -.8792301E-02  -.4223277E-02   .1876081E-02
   .7110395E-02   .1009029E-01   .1114601E-01   .1130943E-01   .1128287E-01
   .1099792E-01   .1006936E-01   .8631602E-02   .7148424E-02   .5748800E-02
   .4113473E-02   .2369048E-02   .1366849E-02   .1663550E-02   .2458942E-02
   .2452344E-02   .1605257E-02   .1223357E-02   .2526242E-02   .5595884E-02
   .9334892E-02   .1214908E-01   .1320718E-01   .1316295E-01   .1342810E-01
   .1445681E-01   .1523340E-01   .1433530E-01   .1108047E-01   .6258605E-02
   .1978063E-02   .4296805E-03   .2195346E-02   .5799280E-02   .8948575E-02
   .1039628E-01   .1080672E-01   .1167025E-01   .1351211E-01   .1520523E-01
   .1499960E-01   .1244576E-01   .8884730E-02   .6467455E-02   .6663843E-02
   .9253408E-02   .1236770E-01   .1407313E-01   .1437149E-01   .1464128E-01
   .1555557E-01   .1634386E-01   .1614187E-01   .1510526E-01   .1385352E-01
   .1266915E-01   .1140823E-01   .1036538E-01   .1063385E-01   .1277881E-01
   .1585553E-01   .1822591E-01   .1919933E-01   .1928836E-01   .1957681E-01
   .2059250E-01   .2193078E-01   .2275372E-01   .2241000E-01   .2101599E-01
   .1932560E-01   .1816124E-01   .1787034E-01   .1782751E-01   .1687009E-01
   .1437455E-01   .1110655E-01   .8781060E-02   .8165680E-02   .8577195E-02
   .9088596E-02   .9318900E-02   .9227189E-02   .9130448E-02   .9473611E-02
   .9790261E-02   .8861752E-02   .5940984E-02   .1884034E-02  -.1333017E-02
  -.2592345E-02  -.2168756E-02  -.8208853E-03   .9064305E-03   .2873491E-02
   .5184303E-02   .7551284E-02   .8691365E-02   .7376922E-02   .4212312E-02
   .1094627E-02  -.8047907E-03  -.1792288E-02  -.2471509E-02  -.2771380E-02
  -.2092568E-02  -.5822907E-03   .8534182E-03   .1397142E-02   .1165141E-02
   .1013700E-02   .1589198E-02   .2780550E-02   .3959323E-02   .4671155E-02
   .5165587E-02   .6004197E-02   .7219207E-02   .8196369E-02   .8383804E-02
   .7747619E-02   .6626656E-02   .5629643E-02   .5149863E-02   .4916952E-02
   .4531332E-02   .4198633E-02   .4422937E-02   .5118463E-02   .5609142E-02
   .5825639E-02   .6459840E-02   .7634301E-02   .8618373E-02   .9194816E-02
   .1000414E-01   .1095039E-01   .1068841E-01   .8510706E-02   .5656745E-02
   .3934029E-02   .3833460E-02   .4470724E-02   .4731394E-02   .4345316E-02
   .3791878E-02   .3851253E-02   .5192906E-02   .7479667E-02   .8906376E-02
   .7973856E-02   .5786784E-02   .4738805E-02   .5462272E-02   .6122380E-02
   .4767322E-02   .1652934E-02  -.1363678E-02  -.3015787E-02  -.3642706E-02
  -.4214397E-02  -.5153413E-02  -.6267575E-02  -.7028335E-02  -.6805025E-02
  -.5816977E-02  -.5025552E-02  -.5057313E-02  -.5698730E-02  -.6064012E-02
  -.5534237E-02  -.4172835E-02  -.2577093E-02  -.1598594E-02  -.1557648E-02
  -.1910943E-02  -.2013699E-02  -.1969640E-02  -.2382468E-02  -.3120432E-02
  -.3227949E-02  -.2361002E-02  -.1327383E-02  -.9245990E-03  -.1134385E-02
  -.1478600E-02  -.1601665E-02  -.1451868E-02  -.1153101E-02  -.9137686E-03
  -.7662766E-03  -.5771179E-03  -.2362788E-03   .5034844E-04  -.1603403E-03
  -.8580649E-03  -.1563842E-02  -.1995418E-02  -.2402342E-02  -.3391545E-02
  -.4845349E-02  -.5722668E-02  -.5338253E-02  -.4309072E-02  -.3668392E-02
  -.3436775E-02  -.2700668E-02  -.9039831E-03   .1352598E-02   .3406080E-02
   .5281156E-02   .7290867E-02   .9247916E-02   .1051091E-01   .1054629E-01
   .8955088E-02   .5707762E-02   .1639251E-02  -.1886450E-02  -.4051124E-02
  -.5030872E-02  -.5447380E-02  -.5457105E-02  -.4761078E-02  -.3321690E-02
  -.1850216E-02  -.1137200E-02  -.1345920E-02  -.2272114E-02  -.3931942E-02
  -.6511206E-02  -.9933388E-02  -.1350086E-01  -.1631009E-01  -.1811177E-01
  -.1908960E-01  -.1924569E-01  -.1856357E-01  -.1706675E-01  -.1513127E-01
  -.1375561E-01  -.1353053E-01  -.1390882E-01  -.1408686E-01  -.1394301E-01
  -.1377263E-01  -.1341216E-01  -.1248791E-01  -.1140623E-01  -.1120154E-01
  -.1229716E-01  -.1393461E-01  -.1522063E-01  -.1613540E-01  -.1676511E-01
  -.1647706E-01  -.1450418E-01  -.1147096E-01  -.9128182E-02  -.8403700E-02
  -.8691898E-02  -.8773747E-02  -.8448275E-02  -.8576376E-02  -.9803552E-02
  -.1171087E-01  -.1320045E-01  -.1351406E-01  -.1256586E-01  -.1085140E-01
  -.9187874E-02  -.8081165E-02  -.7516991E-02  -.7075949E-02  -.6209067E-02
  -.4630958E-02  -.2621914E-02  -.1061233E-02  -.6443417E-03  -.1048469E-02
  -.1251007E-02  -.7929007E-03  -.1344184E-03  -.6373627E-04  -.8626749E-03
  -.2357263E-02  -.4247628E-02  -.6202727E-02  -.7935581E-02  -.9049990E-02
  -.9304868E-02  -.8806951E-02  -.7851329E-02  -.6743040E-02  -.5662025E-02
  -.4634646E-02  -.3484086E-02  -.2227163E-02  -.1320841E-02  -.1340337E-02
  -.2201199E-02  -.2960435E-02  -.2903751E-02  -.2173719E-02  -.1435384E-02
  -.1174187E-02  -.1227436E-02  -.1271868E-02  -.1259050E-02  -.1101773E-02
  -.5428109E-03   .4600995E-03   .1570959E-02   .2245871E-02   .2453790E-02
   .2571392E-02   .2852460E-02   .3023867E-02   .2438666E-02   .6009983E-03
  -.2246075E-02  -.5158536E-02  -.7234105E-02  -.8265801E-02  -.8663942E-02
  -.8901610E-02  -.8931415E-02  -.8278887E-02  -.6854813E-02  -.5385047E-02
  -.4807906E-02  -.5303876E-02  -.6478378E-02  -.8026612E-02  -.9689820E-02
  -.1103527E-01  -.1209232E-01  -.1304705E-01  -.1353086E-01  -.1295174E-01
  -.1154657E-01  -.1031473E-01  -.9590295E-02  -.8626745E-02  -.6803127E-02
  -.4614613E-02  -.3117219E-02  -.2821213E-02  -.3447265E-02  -.4537088E-02
  -.5876794E-02  -.7756983E-02  -.1051522E-01  -.1342462E-01  -.1489853E-01
  -.1462570E-01  -.1379745E-01  -.1327742E-01  -.1254863E-01  -.1077545E-01
  -.8286023E-02  -.6262862E-02  -.4930754E-02  -.3173149E-02  -.5001640E-03
   .1999802E-02   .3115360E-02   .2726867E-02   .1602821E-02   .3487233E-03
  -.6579855E-03  -.9706889E-03  -.4299793E-03   .6703223E-03   .1928293E-02
   .3260862E-02   .4572535E-02   .5287026E-02   .4962149E-02   .3925040E-02
   .2824234E-02   .1714531E-02   .2368112E-03  -.1830538E-02  -.4121357E-02
  -.5711921E-02  -.5995181E-02  -.5271801E-02  -.4500235E-02  -.4404492E-02
  -.4735248E-02  -.4614822E-02  -.3553518E-02  -.1790722E-02  -.1546551E-03
   .7094362E-03   .8935961E-03   .8486627E-03   .9198110E-03   .1145544E-02
   .1551823E-02   .2099106E-02   .2464276E-02   .2301701E-02   .1674574E-02
   .8997152E-03   .2990697E-03   .2506127E-03   .8324804E-03   .1676890E-02
   .2476251E-02   .3224615E-02   .4147335E-02   .5376758E-02   .6754160E-02
   .8033913E-02   .8776311E-02   .8420311E-02   .6787462E-02   .4433767E-02
   .2418124E-02   .1435463E-02   .8904653E-03   .1015983E-03  -.5349894E-03
  -.1203479E-03   .1147593E-02   .1928347E-02   .1701897E-02   .1721704E-02
   .3177618E-02   .5384949E-02   .6673354E-02   .6641079E-02   .6458228E-02
   .6966041E-02   .7701082E-02   .7882962E-02   .7394653E-02   .6634766E-02
   .5700243E-02   .4483852E-02   .3137717E-02   .2047588E-02   .1341918E-02
   .8373717E-03   .7740946E-03   .1696651E-02   .3779798E-02   .6634402E-02
   .9716590E-02   .1273126E-01   .1507669E-01   .1559614E-01   .1389979E-01
   .1111481E-01   .8850669E-02   .7566214E-02   .6324173E-02   .4241140E-02
   .1883876E-02   .8125553E-03   .1692404E-02   .3810348E-02   .6235404E-02
   .8909098E-02   .1188834E-01   .1412057E-01   .1415795E-01   .1173515E-01
   .8237287E-02   .5592792E-02   .4700800E-02   .5065110E-02   .5708020E-02
   .6276657E-02   .7455128E-02   .1043473E-01   .1542882E-01   .2085232E-01
   .2445651E-01   .2526268E-01   .2402609E-01   .2183798E-01   .1913926E-01
   .1587161E-01   .1242522E-01   .9691938E-02   .8232678E-02   .8025471E-02
   .8483202E-02   .8879174E-02   .9021100E-02   .9578663E-02   .1130367E-01
   .1380519E-01   .1556343E-01   .1546075E-01   .1411203E-01   .1322837E-01
   .1381780E-01   .1531900E-01   .1632382E-01   .1607042E-01   .1485651E-01
   .1354469E-01   .1255919E-01   .1137010E-01   .9451695E-02   .7359891E-02
   .6307596E-02   .7030494E-02   .9004310E-02   .1103623E-01   .1235053E-01
   .1280840E-01   .1237270E-01   .1112025E-01   .9396514E-02   .7387624E-02
   .5025363E-02   .2451900E-02   .4378573E-03  -.1838486E-03   .3943624E-03
   .1123779E-02   .1360845E-02   .1539721E-02   .2060736E-02   .2331877E-02
   .1611128E-02   .1493132E-03  -.8779351E-03  -.6765568E-03   .2441778E-03
   .9955732E-03   .1449022E-02   .2214090E-02   .3500765E-02   .4661443E-02
   .5212323E-02   .5593454E-02   .6179037E-02   .6701067E-02   .6905311E-02
   .6952651E-02   .7154935E-02   .7383344E-02   .7160716E-02   .6434308E-02
   .5634863E-02   .4978904E-02   .4169839E-02   .3122176E-02   .2454661E-02
   .2676068E-02   .3215955E-02   .3188895E-02   .2475729E-02   .1847436E-02
   .2371668E-02   .4143832E-02   .6175327E-02   .7391836E-02   .7613386E-02
   .7554152E-02   .7725652E-02   .7739630E-02   .6841841E-02   .4654628E-02
   .1738674E-02  -.6276205E-03  -.1364515E-02  -.5339224E-03   .6074800E-03
   .1017919E-02   .1164363E-02   .2267240E-02   .4387352E-02   .6037672E-02
   .5997846E-02   .4785117E-02   .3789267E-02   .3398908E-02   .2846054E-02
   .1729277E-02   .5420569E-03  -.2027890E-03  -.3211576E-03   .3572803E-03
   .1978882E-02   .4227696E-02   .6340714E-02   .7557506E-02   .7598762E-02
   .6547675E-02   .4470515E-02   .1626947E-02  -.1152371E-02  -.2850840E-02
  -.3104152E-02  -.2527372E-02  -.2029570E-02  -.1680306E-02  -.7652798E-03
   .9633210E-03   .2846335E-02   .4115161E-02   .4563251E-02   .4319141E-02
   .3616496E-02   .2825850E-02   .2431365E-02   .2791051E-02   .3778114E-02
   .4782154E-02   .5276808E-02   .5101593E-02   .4572819E-02   .4091845E-02
   .3597676E-02   .2903749E-02   .2080704E-02   .1249211E-02   .2722322E-03
  -.8724094E-03  -.1724642E-02  -.1611835E-02  -.4559485E-03   .8466256E-03
   .1479696E-02   .1462732E-02   .1304786E-02   .1437881E-02   .1864788E-02
   .2334419E-02   .2554204E-02   .2173056E-02   .1323555E-02   .7388338E-03
   .7271210E-03   .4244999E-03  -.1043451E-02  -.3024145E-02  -.4002019E-02
  -.3519723E-02  -.2663519E-02  -.2677318E-02  -.3506067E-02  -.4197719E-02
  -.4405414E-02  -.4461614E-02  -.4645820E-02  -.5132845E-02  -.5981896E-02
  -.6811566E-02  -.6900950E-02  -.5955698E-02  -.4561894E-02  -.3551381E-02
  -.3055820E-02  -.2577270E-02  -.1486129E-02   .2835005E-03   .2247909E-02
   .3787208E-02   .4500797E-02   .4328158E-02   .3480045E-02   .2386927E-02
   .1182692E-02  -.3508461E-03  -.2227732E-02  -.4011096E-02  -.5114851E-02
  -.5273544E-02  -.4966114E-02  -.5024966E-02  -.5647768E-02  -.5969454E-02
  -.5203027E-02  -.3771513E-02  -.2773627E-02  -.2542640E-02  -.2334115E-02
  -.1439890E-02  -.2121760E-03   .3684647E-03  -.1861717E-03  -.1504010E-02
  -.3023880E-02  -.4272136E-02  -.4556293E-02  -.3313557E-02  -.9254034E-03
   .1388334E-02   .2888997E-02   .3808166E-02   .4409226E-02   .4489413E-02
   .3792615E-02   .2573975E-02   .1440370E-02   .6380595E-03  -.4436010E-04
  -.6403288E-03  -.1099057E-02  -.1395711E-02  -.1399759E-02  -.1195745E-02
  -.9185469E-03  -.8886267E-03  -.1201327E-02  -.1475579E-02  -.1336994E-02
  -.8168208E-03  -.1207121E-03   .6714791E-03   .1712024E-02   .3084958E-02
   .4210191E-02   .4324462E-02   .3295264E-02   .1905746E-02   .9655822E-03
   .6343797E-03   .5842385E-03   .7231796E-03   .1427432E-02   .2793883E-02
   .3859262E-02   .3607753E-02   .2578974E-02   .2138575E-02   .2512173E-02
   .2777482E-02   .2458233E-02   .2008477E-02   .2097954E-02   .2854338E-02
   .3844075E-02   .4748170E-02   .5550038E-02   .6179793E-02   .6392507E-02
   .6214788E-02   .5930157E-02   .5459066E-02   .4475030E-02   .3162686E-02
   .2017290E-02   .1242646E-02   .7034777E-03   .4107230E-03   .5683071E-03
   .1119788E-02   .1999368E-02   .3325163E-02   .5069081E-02   .6624074E-02
   .7127273E-02   .6549721E-02   .5724289E-02   .5063217E-02   .4058697E-02
   .2425928E-02   .1009479E-02   .8741141E-03   .2170723E-02   .4298977E-02
   .6655555E-02   .8635675E-02   .9646268E-02   .9470829E-02   .8488278E-02
   .7090692E-02   .5203437E-02   .2763339E-02   .4271151E-03  -.9515355E-03
  -.1092384E-02  -.4245087E-03   .3070419E-03   .5449942E-03   .2037208E-03
  -.4933445E-03  -.1323660E-02  -.2187602E-02  -.3176689E-02  -.4234192E-02
  -.4974472E-02  -.4961298E-02  -.4160627E-02  -.2968916E-02  -.1768668E-02
  -.9931296E-03  -.8947768E-03  -.1248959E-02  -.1591829E-02  -.1678508E-02
  -.1548150E-02  -.1013999E-02   .3046183E-03   .2133240E-02   .3820308E-02
   .4943863E-02   .5616306E-02   .5871444E-02   .5437318E-02   .4297172E-02
   .2769310E-02   .1163064E-02  -.1629796E-03  -.7286797E-03  -.3647559E-03
   .6268571E-03   .1682710E-02   .2475666E-02   .3206420E-02   .4110136E-02
   .5051920E-02   .5706320E-02   .5895694E-02   .5703720E-02   .5150066E-02
   .4146758E-02   .2951109E-02   .2070633E-02   .1758917E-02   .2008016E-02
   .2533506E-02   .2623378E-02   .1840447E-02   .5378738E-03  -.7606090E-03
  -.1849973E-02  -.2814473E-02  -.3695536E-02  -.4414976E-02  -.4824490E-02
  -.4869571E-02  -.4610599E-02  -.4011740E-02  -.2996694E-02  -.1713730E-02
  -.6643241E-03  -.2118304E-03  -.2846978E-03  -.3337447E-03   .2923144E-03
   .1543948E-02   .2678579E-02   .3171813E-02   .3235017E-02   .3466135E-02
   .4121811E-02   .5047322E-02   .5612931E-02   .5064250E-02   .3100080E-02
   .5987197E-03  -.1304731E-02  -.2341348E-02  -.3102296E-02  -.3898766E-02
  -.4429877E-02  -.4354678E-02  -.3636100E-02  -.2572202E-02  -.1578212E-02
  -.9908755E-03  -.7697461E-03  -.4850219E-03   .7943318E-06   .3839708E-03
   .4009011E-03   .9404756E-04  -.5038734E-03  -.1329715E-02  -.1901791E-02
  -.1882514E-02  -.1255769E-02  -.2221958E-03   .9840947E-03   .2380164E-02
   .3780772E-02   .4795065E-02   .5087414E-02   .4686858E-02   .3814636E-02
   .2531906E-02   .7612552E-03  -.1379436E-02  -.3481825E-02  -.4984842E-02
  -.5580454E-02  -.5385428E-02  -.4923150E-02  -.4603033E-02  -.4380689E-02
  -.4129698E-02  -.3705737E-02  -.3092910E-02  -.2346780E-02  -.1599201E-02
  -.9630249E-03  -.4179431E-03  -.5280867E-04   .1741645E-04  -.3040605E-03
  -.1093448E-02  -.2695027E-02  -.5329380E-02  -.8500568E-02  -.1128427E-01
  -.1289622E-01  -.1319870E-01  -.1257870E-01  -.1139862E-01  -.9943052E-02
  -.8529137E-02  -.7507221E-02  -.7250824E-02  -.7904432E-02  -.9340074E-02
  -.1116377E-01  -.1293406E-01  -.1418692E-01  -.1450587E-01  -.1392270E-01
  -.1294814E-01  -.1184027E-01  -.1036361E-01  -.8495130E-02  -.6668112E-02
  -.5303043E-02  -.4472821E-02  -.4115647E-02  -.4356172E-02  -.5147163E-02
  -.6061854E-02  -.6674502E-02  -.6868278E-02  -.6825053E-02  -.6846725E-02
  -.7094794E-02  -.7564005E-02  -.8055291E-02  -.8349423E-02  -.8552423E-02
  -.8743293E-02  -.8682039E-02  -.8224470E-02  -.7457512E-02  -.6799885E-02
  -.6639660E-02  -.7085283E-02  -.7930270E-02  -.8900712E-02  -.9858892E-02
  -.1056954E-01  -.1081316E-01  -.1061242E-01  -.1031029E-01  -.9953565E-02
  -.8918382E-02  -.6839673E-02  -.4724425E-02  -.3893765E-02  -.4066667E-02
  -.3684240E-02  -.2172353E-02  -.9537106E-03  -.1378497E-02  -.2853355E-02
  -.3897579E-02  -.4311208E-02  -.4992954E-02  -.6282333E-02  -.7631589E-02
  -.8662303E-02  -.9289633E-02  -.9180002E-02  -.8161981E-02  -.6927201E-02
  -.6261801E-02  -.5873171E-02  -.4870411E-02  -.3192587E-02  -.1812386E-02
  -.1489238E-02  -.1619543E-02  -.1489451E-02  -.1436742E-02  -.1909411E-02
  -.2641259E-02  -.2803203E-02  -.1947683E-02  -.5660212E-03   .4105887E-03
   .5430884E-03   .8372864E-04  -.4685498E-03  -.6409498E-03  -.4776608E-03
  -.2584115E-03  -.2944289E-03  -.7851571E-03  -.1648908E-02  -.2571744E-02
  -.3344460E-02  -.3997957E-02  -.4518263E-02  -.4913651E-02  -.5431128E-02
  -.6138227E-02  -.6568899E-02  -.6191364E-02  -.5069287E-02  -.3683046E-02
  -.2612404E-02  -.1992699E-02  -.1583391E-02  -.1204949E-02  -.8592166E-03
  -.8211490E-03  -.1156923E-02  -.1623998E-02  -.1913413E-02  -.2077961E-02
  -.2446922E-02  -.3049181E-02  -.3784631E-02  -.4454724E-02  -.5092023E-02
  -.5806179E-02  -.6505974E-02  -.7133061E-02  -.7712255E-02  -.8181804E-02
  -.8444716E-02  -.8511334E-02  -.8390928E-02  -.8181582E-02  -.7857639E-02
  -.7276080E-02  -.6498554E-02  -.5856474E-02  -.5363120E-02  -.4581468E-02
  -.3153915E-02  -.1263965E-02   .6898640E-03   .2426145E-02   .3625714E-02
   .4095511E-02   .3767845E-02   .2787076E-02   .1463817E-02  -.1124384E-04
  -.1375555E-02  -.2198096E-02  -.2203415E-02  -.1525139E-02  -.5829370E-03
   .1762211E-03   .6144284E-03   .7875304E-03   .8800920E-03   .1140350E-02
   .1405388E-02   .1202322E-02   .2788708E-03  -.1273963E-02  -.2927277E-02
  -.4027403E-02  -.4262136E-02  -.3689622E-02  -.2550916E-02  -.1158323E-02
   .2068817E-03   .1372251E-02   .2050486E-02   .2260421E-02   .2479928E-02
   .2935830E-02   .3227862E-02   .2735210E-02   .1523218E-02   .3365375E-03
  -.4099892E-03  -.1019365E-02  -.1672202E-02  -.2250662E-02  -.2391738E-02
  -.1893177E-02  -.9176961E-03   .3259426E-05   .3952247E-03   .1691045E-03
  -.5583066E-03  -.1630989E-02  -.2809526E-02  -.3910986E-02  -.4744124E-02
  -.5233259E-02  -.5598187E-02  -.5879075E-02  -.5873543E-02  -.5482728E-02
  -.4826288E-02  -.4058838E-02  -.3367677E-02  -.2880614E-02  -.2536003E-02
  -.2406803E-02  -.2528531E-02  -.2659171E-02  -.2583219E-02  -.2267413E-02
  -.1741025E-02  -.1268113E-02  -.1156062E-02  -.1414387E-02  -.1660349E-02
  -.1560546E-02  -.1050649E-02  -.3902786E-03   .1539730E-04   .2846319E-03
   .6986202E-03   .1183769E-02   .1533629E-02   .1726941E-02   .1915404E-02
   .2067918E-02   .1740420E-02   .6062580E-03  -.1053378E-02  -.2603422E-02
  -.3603581E-02  -.4046882E-02  -.4232315E-02  -.4489085E-02  -.4826552E-02
  -.4867963E-02  -.4297148E-02  -.3454875E-02  -.2963803E-02  -.3076068E-02
  -.3569223E-02  -.4171886E-02  -.5027218E-02  -.6394220E-02  -.8229077E-02
  -.1004972E-01  -.1103297E-01  -.1062923E-01  -.8978683E-02  -.6772850E-02
  -.4855042E-02  -.3692047E-02  -.3232699E-02  -.3328221E-02  -.3999151E-02
  -.5297256E-02  -.6990513E-02  -.8524496E-02  -.9542259E-02  -.1002048E-01
  -.1000548E-01  -.9565168E-02  -.8646510E-02  -.7486061E-02  -.6664345E-02
  -.6404307E-02  -.6441462E-02  -.6616871E-02  -.7173342E-02  -.8383976E-02
  -.9898278E-02  -.1098915E-01  -.1125116E-01  -.1078785E-01  -.9853435E-02
  -.8630882E-02  -.7431337E-02  -.6548723E-02  -.5784492E-02  -.4790385E-02
  -.3687967E-02  -.2972327E-02  -.2909647E-02  -.3271281E-02  -.3534554E-02
  -.3433164E-02  -.3116859E-02  -.2824709E-02  -.2520001E-02  -.2029366E-02
  -.1201560E-02   .7291729E-05   .1460544E-02   .3021645E-02   .4609414E-02
   .6202952E-02   .7683369E-02   .8530412E-02   .8475954E-02   .7885941E-02
   .7045430E-02   .5741940E-02   .3733178E-02   .1249217E-02  -.9615358E-03
  -.2082002E-02  -.2007046E-02  -.1234100E-02  -.1983074E-03   .1249919E-02
   .3298310E-02   .5739598E-02   .8208481E-02   .1017702E-01   .1119278E-01
   .1120449E-01   .1044200E-01   .9473773E-02   .8790952E-02   .8247288E-02
   .7414679E-02   .6205060E-02   .5092712E-02   .4616834E-02   .4692899E-02
   .4729519E-02   .4239340E-02   .3346372E-02   .2675702E-02   .2817882E-02
   .3536564E-02   .4197317E-02   .4596281E-02   .5053898E-02   .5829002E-02
   .6765326E-02   .7714074E-02   .8689079E-02   .9784310E-02   .1076325E-01
   .1121155E-01   .1092439E-01   .1003925E-01   .8954533E-02   .7967326E-02
   .7411479E-02   .7647264E-02   .8729821E-02   .1005443E-01   .1098421E-01
   .1140166E-01   .1158192E-01   .1186270E-01   .1218062E-01   .1206342E-01
   .1127516E-01   .1028399E-01   .9808462E-02   .9958376E-02   .1011029E-01
   .9712865E-02   .9053968E-02   .8859321E-02   .9548380E-02   .1077884E-01
   .1163382E-01   .1160192E-01   .1108255E-01   .1094784E-01   .1140172E-01
   .1182615E-01   .1175405E-01   .1135499E-01   .1097568E-01   .1061836E-01
   .1031408E-01   .1004488E-01   .9672419E-02   .8856506E-02   .7401944E-02
   .5741136E-02   .4460981E-02   .4117255E-02   .4891620E-02   .6497801E-02
   .8265418E-02   .9556335E-02   .1007360E-01   .9962334E-02   .9383312E-02
   .8436525E-02   .7385886E-02   .6453686E-02   .5822279E-02   .5614887E-02
   .5985963E-02   .7188622E-02   .9225950E-02   .1175332E-01   .1410538E-01
   .1558759E-01   .1579921E-01   .1453652E-01   .1206328E-01   .9157070E-02
   .6479210E-02   .4278754E-02   .2520118E-02   .1273544E-02   .8963272E-03
   .1626017E-02   .3322566E-02   .5414802E-02   .7112814E-02   .7820242E-02
   .7683429E-02   .7380268E-02   .7135501E-02   .6611936E-02   .5398265E-02
   .3387479E-02   .1147078E-02  -.5770552E-03  -.1493856E-02  -.1980526E-02
  -.2437175E-02  -.2728056E-02  -.2397041E-02  -.1220408E-02   .3969412E-03
   .1745834E-02   .2417110E-02   .2443114E-02   .2059866E-02   .1459227E-02
   .6761493E-03  -.3998138E-03  -.1624699E-02  -.2558284E-02  -.2863662E-02
  -.2698281E-02  -.2466847E-02  -.2264385E-02  -.1906291E-02  -.1025486E-02
   .3737739E-03   .1710343E-02   .2496105E-02   .2895430E-02   .3294512E-02
   .3746488E-02   .4092671E-02   .4266419E-02   .4271621E-02   .3982003E-02
   .3405499E-02   .2866969E-02   .2602171E-02   .2615570E-02   .2746476E-02
   .3031747E-02   .3624824E-02   .4454221E-02   .5214174E-02   .5545351E-02
   .5220982E-02   .4299671E-02   .3049134E-02   .1861703E-02   .1164884E-02
   .1187978E-02   .1814712E-02   .2628218E-02   .3377198E-02   .4370746E-02
   .5769264E-02   .7212310E-02   .8208432E-02   .8734550E-02   .9081939E-02
   .9382813E-02   .9427505E-02   .9117050E-02   .8475944E-02   .7476486E-02
   .6349685E-02   .5657281E-02   .5623324E-02   .5716087E-02   .5314528E-02
   .4506815E-02   .3811818E-02   .3528265E-02   .3521358E-02   .3646279E-02
   .4175443E-02   .5475718E-02   .7386880E-02   .9347885E-02   .1088888E-01
   .1208175E-01   .1332270E-01   .1467126E-01   .1569740E-01   .1595568E-01
   .1555116E-01   .1508448E-01   .1494989E-01   .1501435E-01   .1501815E-01
   .1479128E-01   .1427012E-01   .1341508E-01   .1228035E-01   .1120549E-01
   .1035268E-01   .9511969E-02   .8694022E-02   .8050350E-02   .7584555E-02
   .7221204E-02   .7088061E-02   .7367044E-02   .7873953E-02   .8298976E-02
   .8681364E-02   .9314747E-02   .1043792E-01   .1176964E-01   .1303162E-01
   .1413020E-01   .1470903E-01   .1437554E-01   .1316547E-01   .1176076E-01
   .1075659E-01   .1012205E-01   .9441420E-02   .8628871E-02   .7892020E-02
   .7413066E-02   .7212569E-02   .6897600E-02   .6321417E-02   .6101885E-02
   .6724294E-02   .7817159E-02   .8555800E-02   .8708266E-02   .9023145E-02
   .1020539E-01   .1181216E-01   .1267769E-01   .1237528E-01   .1146283E-01
   .1076660E-01   .1044719E-01   .1015988E-01   .9847666E-02   .9828405E-02
   .1019076E-01   .1046625E-01   .1044813E-01   .1017361E-01   .9852580E-02
   .9736909E-02   .9511093E-02   .8765448E-02   .7943233E-02   .7831551E-02
   .8455649E-02   .8688841E-02   .7655138E-02   .5854720E-02   .4613769E-02
   .4627335E-02   .5093936E-02   .4784331E-02   .3505819E-02   .2132391E-02
   .1386677E-02   .8578995E-03  -.4655248E-04  -.9807106E-03  -.1309648E-02
  -.1007813E-02  -.5689034E-03   .9025247E-05   .1434190E-02   .3833598E-02
   .6208586E-02   .7257585E-02   .6726792E-02   .5638448E-02   .5153036E-02
   .5168373E-02   .4674254E-02   .3357125E-02   .1644886E-02   .6599213E-04
  -.9324238E-03  -.8934607E-03   .6319994E-04   .1113093E-02   .1719396E-02
   .2168313E-02   .3021618E-02   .4027521E-02   .4437056E-02   .3874367E-02
   .2743711E-02   .1735567E-02   .9882268E-03   .2632575E-03  -.6191579E-03
  -.1827383E-02  -.3275185E-02  -.4228699E-02  -.3620945E-02  -.1376452E-02
   .1450999E-02   .3578021E-02   .4112083E-02   .2764198E-02   .6176728E-04
  -.2567681E-02  -.3893374E-02  -.4048611E-02  -.4103585E-02  -.4640342E-02
  -.5236659E-02  -.5210819E-02  -.4533698E-02  -.3857178E-02  -.3641116E-02
  -.3892195E-02  -.4262843E-02  -.4339373E-02  -.3965889E-02  -.3504414E-02
  -.3289227E-02  -.3132241E-02  -.2733663E-02  -.2730080E-02  -.4212483E-02
  -.7077876E-02  -.1017260E-01  -.1217645E-01  -.1260637E-01  -.1190102E-01
  -.1082584E-01  -.9891621E-02  -.9124943E-02  -.8285149E-02  -.7355847E-02
  -.6751775E-02  -.6993887E-02  -.8438082E-02  -.1080377E-01  -.1307995E-01
  -.1441487E-01  -.1441343E-01  -.1316598E-01  -.1137171E-01  -.9856151E-02
  -.8874078E-02  -.7882879E-02  -.6251692E-02  -.4328922E-02  -.3149159E-02
  -.3310747E-02  -.4332682E-02  -.5328964E-02  -.5987610E-02  -.6392806E-02
  -.6662924E-02  -.7060764E-02  -.7799472E-02  -.8767443E-02  -.9784236E-02
  -.1065565E-01  -.1097814E-01  -.1041603E-01  -.9019872E-02  -.7328983E-02
  -.5948694E-02  -.5013273E-02  -.4107376E-02  -.3078303E-02  -.2410288E-02
  -.2498171E-02  -.3091167E-02  -.3632699E-02  -.3775000E-02  -.3593577E-02
  -.3455238E-02  -.3770820E-02  -.4682368E-02  -.5997331E-02  -.7212929E-02
  -.7672180E-02  -.7275742E-02  -.6638403E-02  -.6530738E-02  -.7164963E-02
  -.8156935E-02  -.8830709E-02  -.8590566E-02  -.7315867E-02  -.5496951E-02
  -.3802492E-02  -.2652041E-02  -.2261409E-02  -.2495883E-02  -.2968641E-02
  -.3525818E-02  -.3946976E-02  -.4008260E-02  -.3924806E-02  -.4014113E-02
  -.4172428E-02  -.3857316E-02  -.3061989E-02  -.2365452E-02  -.2194933E-02
  -.2338077E-02  -.2467948E-02  -.2649800E-02  -.3038791E-02  -.3871252E-02
  -.5147710E-02  -.6566172E-02  -.7869668E-02  -.9113337E-02  -.1029743E-01
  -.1102636E-01  -.1081404E-01  -.9461328E-02  -.7550441E-02  -.6099014E-02
  -.5559245E-02  -.5584807E-02  -.5464121E-02  -.5023780E-02  -.4664560E-02
  -.4705059E-02  -.4940377E-02  -.4806777E-02  -.4105163E-02  -.3139420E-02
  -.2453354E-02  -.2283163E-02  -.2577550E-02  -.3232345E-02  -.4061862E-02
  -.4926297E-02  -.5752239E-02  -.6351195E-02  -.6667259E-02  -.6818448E-02
  -.6825305E-02  -.6664220E-02  -.6369146E-02  -.6173657E-02  -.6300017E-02
  -.6626582E-02  -.6834355E-02  -.6748196E-02  -.6663825E-02  -.7126696E-02
  -.8278800E-02  -.9646176E-02  -.1052745E-01  -.1070761E-01  -.1051903E-01
  -.1049187E-01  -.1091835E-01  -.1142229E-01  -.1131373E-01  -.1033437E-01
  -.8725130E-02  -.7012965E-02  -.5963967E-02  -.6209530E-02  -.7499293E-02
  -.8936678E-02  -.1001906E-01  -.1117621E-01  -.1277925E-01  -.1450942E-01
  -.1602666E-01  -.1743045E-01  -.1867946E-01  -.1934561E-01  -.1903294E-01
  -.1790052E-01  -.1644085E-01  -.1532103E-01  -.1489220E-01  -.1495674E-01
  -.1496471E-01  -.1463841E-01  -.1423786E-01  -.1415127E-01  -.1456852E-01
  -.1537179E-01  -.1619965E-01  -.1679843E-01  -.1713649E-01  -.1746631E-01
  -.1794150E-01  -.1838097E-01  -.1857159E-01  -.1876471E-01  -.1954596E-01
  -.2080222E-01  -.2175590E-01  -.2198653E-01  -.2203325E-01  -.2265536E-01
  -.2362369E-01  -.2433427E-01  -.2437432E-01  -.2365170E-01  -.2245965E-01
  -.2119982E-01  -.2012457E-01  -.1910614E-01  -.1799068E-01  -.1711980E-01
  -.1707275E-01  -.1800606E-01  -.1942658E-01  -.2089978E-01  -.2240177E-01
  -.2412955E-01  -.2592361E-01  -.2705004E-01  -.2697441E-01  -.2578344E-01
  -.2397328E-01  -.2196660E-01  -.2002985E-01  -.1844231E-01  -.1732247E-01
  -.1664710E-01  -.1637637E-01  -.1625830E-01  -.1595089E-01  -.1569547E-01
  -.1584073E-01  -.1644590E-01  -.1722240E-01  -.1795439E-01  -.1865004E-01
  -.1934659E-01  -.1991492E-01  -.2023877E-01  -.2037665E-01  -.2038122E-01
  -.2023794E-01  -.1981780E-01  -.1897269E-01  -.1772187E-01  -.1641514E-01
  -.1559351E-01  -.1542698E-01  -.1554572E-01  -.1546904E-01  -.1525106E-01
  -.1546578E-01  -.1633253E-01  -.1743339E-01  -.1826983E-01  -.1853067E-01
  -.1818456E-01  -.1748026E-01  -.1662905E-01  -.1568295E-01  -.1436773E-01
  -.1265606E-01  -.1108233E-01  -.1043131E-01  -.1096088E-01  -.1207279E-01
  -.1318366E-01  -.1421568E-01  -.1544650E-01  -.1684194E-01  -.1792962E-01
  -.1813478E-01  -.1738505E-01  -.1617997E-01  -.1493315E-01  -.1388550E-01
  -.1304687E-01  -.1248703E-01  -.1225767E-01  -.1192824E-01  -.1105798E-01
  -.9604080E-02  -.7981021E-02  -.6943847E-02  -.6768855E-02  -.6950332E-02
  -.6920451E-02  -.6670778E-02  -.6427462E-02  -.6280927E-02  -.6102396E-02
  -.5757619E-02  -.5194917E-02  -.4479731E-02  -.3651019E-02  -.2645316E-02
  -.1594111E-02  -.8078516E-03  -.4026094E-03  -.1701180E-03   .3367067E-04
  -.5581137E-04  -.4657441E-03  -.8792189E-03  -.1051062E-02  -.1080407E-02
  -.1289682E-02  -.1656919E-02  -.1591851E-02  -.6793264E-03   .6277934E-03
   .1692236E-02   .2153011E-02   .2388041E-02   .3118615E-02   .4402317E-02
   .5470354E-02   .5497407E-02   .4508849E-02   .3285258E-02   .2459342E-02
   .1964323E-02   .1455152E-02   .9929377E-03   .1032760E-02   .1701146E-02
   .2565336E-02   .3183304E-02   .3639400E-02   .4265388E-02   .4984729E-02
   .5415115E-02   .5311826E-02   .4852121E-02   .4448792E-02   .4256428E-02
   .4248239E-02   .4418651E-02   .4556072E-02   .4321094E-02   .3764687E-02
   .3001932E-02   .2098423E-02   .1270850E-02   .9230167E-03   .1361308E-02
   .2407774E-02   .3347624E-02   .3584490E-02   .3291596E-02   .3082258E-02
   .3155637E-02   .3153508E-02   .2673028E-02   .1935957E-02   .1424989E-02
   .1223730E-02   .9504968E-03   .4172201E-03  -.5778944E-04  -.1158162E-03
   .2425728E-03   .5942455E-03   .4522715E-03  -.1672523E-03  -.8080836E-03
  -.1215601E-02  -.1492141E-02  -.1987578E-02  -.2936023E-02  -.3959126E-02
  -.4510505E-02  -.4385384E-02  -.3674920E-02  -.2865881E-02  -.2356196E-02
  -.2214532E-02  -.2393429E-02  -.2851370E-02  -.3431220E-02  -.3846012E-02
  -.3632794E-02  -.2642459E-02  -.1414648E-02  -.7565668E-03  -.1069217E-02
  -.1810613E-02  -.2306970E-02  -.2398799E-02  -.2434674E-02  -.2836207E-02
  -.3680835E-02  -.4682009E-02  -.5405642E-02  -.5475817E-02  -.4795723E-02
  -.3573704E-02  -.2328858E-02  -.1462155E-02  -.9857560E-03  -.8395715E-03
  -.1094229E-02  -.1661941E-02  -.2411137E-02  -.3236491E-02  -.3993174E-02
  -.4510879E-02  -.4617674E-02  -.4335115E-02  -.3777027E-02  -.3021590E-02
  -.2211670E-02  -.1541397E-02  -.1080966E-02  -.7376067E-03  -.4406378E-03
  -.1781916E-03   .1814895E-03   .7893431E-03   .1683854E-02   .2606348E-02
   .3261179E-02   .3864044E-02   .4687524E-02   .5619822E-02   .6185048E-02
   .6003550E-02   .5265309E-02   .4475015E-02   .4106860E-02   .4266887E-02
   .4633882E-02   .4889626E-02   .5122447E-02   .5621748E-02   .6316548E-02
   .6788690E-02   .6747271E-02   .6311841E-02   .5698495E-02   .5250506E-02
   .5319929E-02   .5929196E-02   .6801827E-02   .7878555E-02   .9501455E-02
   .1171499E-01   .1378484E-01   .1485818E-01   .1479838E-01   .1399940E-01
   .1285048E-01   .1182856E-01   .1139286E-01   .1151681E-01   .1183832E-01
   .1201680E-01   .1231313E-01   .1312807E-01   .1430035E-01   .1507696E-01
   .1478931E-01   .1362747E-01   .1213867E-01   .1075873E-01   .9739595E-02
   .9335884E-02   .9709081E-02   .1055548E-01   .1141403E-01   .1234984E-01
   .1352222E-01   .1454708E-01   .1487237E-01   .1439740E-01   .1368066E-01
   .1318936E-01   .1270871E-01   .1193356E-01   .1108042E-01   .1065089E-01
   .1104451E-01   .1232054E-01   .1382549E-01   .1471953E-01   .1462076E-01
   .1405079E-01   .1401047E-01   .1475597E-01   .1556632E-01   .1555195E-01
   .1464219E-01   .1370382E-01   .1323096E-01   .1290493E-01   .1233345E-01
   .1176905E-01   .1160498E-01   .1170842E-01   .1180705E-01   .1164866E-01
   .1132617E-01   .1122277E-01   .1148443E-01   .1176759E-01   .1151031E-01
   .1073023E-01   .9940268E-02   .9667479E-02   .9963386E-02   .1053578E-01
   .1118491E-01   .1184877E-01   .1246696E-01   .1312848E-01   .1392282E-01
   .1462649E-01   .1487911E-01   .1465094E-01   .1433935E-01   .1416942E-01
   .1395141E-01   .1345932E-01   .1270211E-01   .1174869E-01   .1057458E-01
   .9098481E-02   .7582701E-02   .6463392E-02   .5941739E-02   .5924780E-02
   .6330362E-02   .7054945E-02   .7839443E-02   .8459930E-02   .8919573E-02
   .9422259E-02   .1009064E-01   .1089095E-01   .1173695E-01   .1265509E-01
   .1349434E-01   .1381527E-01   .1349888E-01   .1282104E-01   .1205259E-01
   .1119337E-01   .1010177E-01   .9044403E-02   .8418028E-02   .8256915E-02
   .8398999E-02   .8699688E-02   .9043000E-02   .9150165E-02   .8757512E-02
   .7834117E-02   .6541600E-02   .5358189E-02   .4713064E-02   .4889312E-02
   .5871200E-02   .7060563E-02   .7897294E-02   .8519361E-02   .9128143E-02
   .9584392E-02   .9684563E-02   .9366540E-02   .8775611E-02   .8188413E-02
   .7597830E-02   .6917058E-02   .6262742E-02   .6113806E-02   .6619365E-02
   .7267749E-02   .7485208E-02   .7254335E-02   .7043703E-02   .7176511E-02
   .7691649E-02   .8204396E-02   .8383993E-02   .8340513E-02   .8409046E-02
   .8768416E-02   .9147367E-02   .8975100E-02   .7901385E-02   .6348464E-02
   .5187433E-02   .4658128E-02   .4192290E-02   .3660522E-02   .3646851E-02
   .4775421E-02   .7016290E-02   .9468358E-02   .1136077E-01   .1265238E-01
   .1364158E-01   .1424528E-01   .1413855E-01   .1329362E-01   .1194136E-01
   .1047909E-01   .9276722E-02   .8494323E-02   .8203005E-02   .8357860E-02
   .8808849E-02   .9339135E-02   .9738190E-02   .9903005E-02   .9918769E-02
   .1012371E-01   .1072674E-01   .1151096E-01   .1194210E-01   .1171574E-01
   .1106213E-01   .1041807E-01   .9967434E-02   .9421123E-02   .8453731E-02
   .7378075E-02   .6734085E-02   .6997219E-02   .8224316E-02   .9718997E-02
   .1076762E-01   .1135161E-01   .1189094E-01   .1258767E-01   .1332871E-01
   .1384592E-01   .1379404E-01   .1318918E-01   .1238168E-01   .1180388E-01
   .1161027E-01   .1140699E-01   .1089931E-01   .1023393E-01   .9624528E-02
   .9089921E-02   .8417645E-02   .7539076E-02   .6682167E-02   .6165584E-02
   .6047488E-02   .6092557E-02   .5963094E-02   .5713495E-02   .5699536E-02
   .6151922E-02   .6897542E-02   .7527335E-02   .7861082E-02   .7881474E-02
   .7681651E-02   .7211557E-02   .6262151E-02   .5037459E-02   .4102220E-02
   .3867742E-02   .4172895E-02   .4601165E-02   .5036101E-02   .5411979E-02
   .5372840E-02   .4626476E-02   .3367885E-02   .2043360E-02   .1232627E-02
   .1277425E-02   .1763181E-02   .1937460E-02   .1707430E-02   .1438826E-02
   .1448638E-02   .1659099E-02   .1486065E-02   .5226394E-03  -.1064211E-02
  -.2507399E-02  -.3249550E-02  -.3401228E-02  -.3283944E-02  -.3220336E-02
  -.3439720E-02  -.4044741E-02  -.4863401E-02  -.5402311E-02  -.5395396E-02
  -.5011503E-02  -.4390044E-02  -.3571042E-02  -.2833438E-02  -.2321957E-02
  -.1804588E-02  -.1013055E-02  -.8629149E-04   .5047897E-03   .5124188E-03
   .1613959E-03  -.1887102E-03  -.2395896E-03   .7439411E-04   .7915024E-03
   .1684528E-02   .2332773E-02   .2547971E-02   .2495774E-02   .2423547E-02
   .2262954E-02   .1794286E-02   .9995697E-03   .2528989E-03  -.9116755E-04
   .8880994E-04   .7556019E-03   .1581108E-02   .2083853E-02   .1979234E-02
   .1301540E-02   .2467695E-03  -.9808112E-03  -.2272228E-02  -.3364087E-02
  -.3879899E-02  -.3691936E-02  -.3169233E-02  -.2809923E-02  -.2543060E-02
  -.1778867E-02  -.3501842E-03   .1030362E-02   .1560646E-02   .1350147E-02
   .1299204E-02   .1886457E-02   .2725780E-02   .3149125E-02   .2918740E-02
   .2517041E-02   .2460269E-02   .2561161E-02   .2383509E-02   .1808597E-02
   .1323196E-02   .1470006E-02   .2147064E-02   .2857964E-02   .3108118E-02
   .2830475E-02   .2474222E-02   .2542909E-02   .3149260E-02   .3756779E-02
   .3761694E-02   .3276143E-02   .2882149E-02   .2773727E-02   .2689154E-02
   .2410992E-02   .2113659E-02   .2131907E-02   .2544133E-02   .3250673E-02
   .4126880E-02   .4871841E-02   .5437864E-02   .5988662E-02   .6488494E-02
   .6680497E-02   .6127708E-02   .4713259E-02   .2837981E-02   .1361974E-02
   .7222824E-03   .4845051E-03   .3657703E-03   .6183065E-03   .1395346E-02
   .2533788E-02   .3679077E-02   .4453665E-02   .4692710E-02   .4462219E-02
   .4037163E-02   .3694681E-02   .3542176E-02   .3513007E-02   .3422394E-02
   .3114412E-02   .2478251E-02   .1605972E-02   .8341277E-03   .3160919E-03
   .9884962E-04  -.1055216E-03  -.6112062E-03  -.1224558E-02  -.1638665E-02
  -.1778298E-02  -.1701930E-02  -.1698881E-02  -.2064576E-02  -.2811571E-02
  -.3857301E-02  -.4964037E-02  -.5815411E-02  -.6366661E-02  -.6608890E-02
  -.6399936E-02  -.5935348E-02  -.5612259E-02  -.5536113E-02  -.5429181E-02
  -.4970542E-02  -.4203009E-02  -.3668744E-02  -.3864160E-02  -.4882810E-02
  -.6258140E-02  -.7542393E-02  -.8483443E-02  -.9116774E-02  -.9464091E-02
  -.9371521E-02  -.8782658E-02  -.7955463E-02  -.7261332E-02  -.6826016E-02
  -.6751875E-02  -.6929649E-02  -.7141847E-02  -.7146689E-02  -.6692054E-02
  -.5730311E-02  -.4755956E-02  -.4134328E-02  -.3944323E-02  -.4302203E-02
  -.5227394E-02  -.6303456E-02  -.7084354E-02  -.7545655E-02  -.7781984E-02
  -.7721504E-02  -.7204170E-02  -.6307765E-02  -.5376929E-02  -.4751941E-02
  -.4655484E-02  -.5080968E-02  -.5769532E-02  -.6555135E-02  -.7717330E-02
  -.9473623E-02  -.1147053E-01  -.1287463E-01  -.1301178E-01  -.1209600E-01
  -.1080955E-01  -.9666153E-02  -.8710534E-02  -.7848840E-02  -.6993099E-02
  -.6136969E-02  -.5455454E-02  -.5044720E-02  -.4848545E-02  -.4631827E-02
  -.4208614E-02  -.3807233E-02  -.3752299E-02  -.3958903E-02  -.3980603E-02
  -.3706026E-02  -.3530148E-02  -.3636681E-02  -.3873905E-02  -.4164086E-02
  -.4759030E-02  -.5753744E-02  -.6805557E-02  -.7498361E-02  -.7784691E-02
  -.7796688E-02  -.7588560E-02  -.7187237E-02  -.6727312E-02  -.6225151E-02
  -.5757458E-02  -.5470746E-02  -.5347816E-02  -.5346898E-02  -.5362486E-02
  -.5159684E-02  -.4723003E-02  -.4425205E-02  -.4468427E-02  -.4375182E-02
  -.3844966E-02  -.3473184E-02  -.3939208E-02  -.5152668E-02  -.6393080E-02
  -.7284135E-02  -.7832913E-02  -.8079819E-02  -.7891088E-02  -.6990621E-02
  -.5601280E-02  -.4395682E-02  -.3910286E-02  -.4180620E-02  -.4793641E-02
  -.5375127E-02  -.5827598E-02  -.6269775E-02  -.6979551E-02  -.7830964E-02
  -.8107395E-02  -.7235547E-02  -.5529751E-02  -.3858905E-02  -.2732989E-02
  -.2142787E-02  -.1857267E-02  -.1763611E-02  -.1950673E-02  -.2371038E-02
  -.2804593E-02  -.3143414E-02  -.3366434E-02  -.3384813E-02  -.3068398E-02
  -.2461719E-02  -.1870838E-02  -.1550349E-02  -.1604178E-02  -.2026447E-02
  -.2500078E-02  -.2636550E-02  -.2440296E-02  -.2325718E-02  -.2741747E-02
  -.3540560E-02  -.4246800E-02  -.4657313E-02  -.4834307E-02  -.4880077E-02
  -.4812709E-02  -.4606729E-02  -.4344657E-02  -.4111168E-02  -.3740421E-02
  -.3187478E-02  -.2725550E-02  -.2468273E-02  -.2202331E-02  -.1729471E-02
  -.1163411E-02  -.8319521E-03  -.7513046E-03  -.5121125E-03  -.9426832E-04
   .1102904E-03  -.1041918E-03  -.4350472E-03  -.7269711E-03  -.1005857E-02
  -.1290080E-02  -.1521786E-02  -.1613989E-02  -.1638738E-02  -.1597496E-02
  -.1449283E-02  -.1308286E-02  -.1226638E-02  -.1265975E-02  -.1462751E-02
  -.1755635E-02  -.1895586E-02  -.1762793E-02  -.1607096E-02  -.1627298E-02
  -.1719882E-02  -.1551279E-02  -.1067023E-02  -.4236793E-03   .3354120E-03
   .1188207E-02   .1925541E-02   .2370548E-02   .2626834E-02   .2917830E-02
   .3273135E-02   .3365330E-02   .3113373E-02   .2752713E-02   .2435671E-02
   .2306239E-02   .2406621E-02   .2739605E-02   .3283602E-02   .3855254E-02
   .4183089E-02   .4036829E-02   .3279598E-02   .1891461E-02   .1910918E-03
  -.7437499E-03   .7197348E-03   .5121027E-02   .1050266E-01   .1358116E-01
   .1223079E-01   .7163234E-02   .1438680E-02  -.1891459E-02  -.1897500E-02
  -.2518540E-03   .5615385E-03  -.3135864E-03  -.1546342E-02  -.1283100E-02
   .1163515E-02   .5156246E-02   .9050025E-02   .1101452E-01   .1032476E-01
   .7937597E-02   .5758074E-02   .5349142E-02   .6571154E-02   .7553551E-02
   .6420252E-02   .3033741E-02  -.4693045E-03  -.1348711E-02   .8899431E-03
   .3995461E-02   .5765938E-02   .6215130E-02   .6828322E-02   .8587178E-02
   .1132048E-01   .1429653E-01   .1690708E-01   .1840142E-01   .1782552E-01
   .1506034E-01   .1170724E-01   .1001500E-01   .1059791E-01   .1195330E-01
   .1223089E-01   .1112507E-01   .9672916E-02   .9020130E-02   .9516479E-02
   .1056570E-01   .1125098E-01   .1111105E-01   .1042309E-01   .9797876E-02
   .9656348E-02   .1007973E-01   .1069236E-01   .1096003E-01   .1061202E-01
   .9947896E-02   .9580944E-02   .9838451E-02   .1039949E-01   .1060422E-01
   .1009708E-01   .9307518E-02   .8933906E-02   .8907626E-02   .8492572E-02
   .7028364E-02   .4588143E-02   .2127852E-02   .8933700E-03   .1449795E-02
   .3061883E-02   .4303286E-02   .4511234E-02   .4226753E-02   .4270655E-02
   .4802633E-02   .5394081E-02   .5572942E-02   .5140589E-02   .4351378E-02
   .4038859E-02   .4939036E-02   .6975738E-02   .9299314E-02   .1068881E-01
   .1060103E-01   .9418772E-02   .7865814E-02   .6554668E-02   .5830450E-02
   .5767156E-02   .6130757E-02   .6451674E-02   .6242561E-02   .5536890E-02
   .4803511E-02   .4450016E-02   .4452938E-02   .4440488E-02   .4184428E-02
   .3695566E-02   .3107470E-02   .2579077E-02   .2028911E-02   .1117587E-02
  -.3959766E-03  -.2267652E-02  -.3805524E-02  -.4435544E-02  -.4374086E-02
  -.4241801E-02  -.4211839E-02  -.3679762E-02  -.1949969E-02   .5164429E-03
   .2426130E-02   .3105880E-02   .2982327E-02   .2893886E-02   .3084305E-02
   .3086141E-02   .2495151E-02   .1545139E-02   .8172173E-03   .5805560E-03
   .5757426E-03   .6242137E-03   .8546329E-03   .1219738E-02   .1615128E-02
   .2058456E-02   .2661007E-02   .3410002E-02   .4063516E-02   .4337340E-02
   .4087854E-02   .3330202E-02   .2180702E-02   .1043379E-02   .2935911E-03
  -.1338005E-03  -.4975593E-03  -.8959051E-03  -.1012870E-02  -.4325298E-03
   .7762121E-03   .2188795E-02   .3261946E-02   .3659239E-02   .3379765E-02
   .2579648E-02   .1546228E-02   .3942850E-03  -.9996772E-03  -.2642571E-02
  -.4191951E-02  -.5076430E-02  -.5019078E-02  -.4428402E-02  -.3641132E-02
  -.2549607E-02  -.1000575E-02   .6931805E-03   .1738490E-02   .1651471E-02
   .5896612E-03  -.9519784E-03  -.2493379E-02  -.3722036E-02  -.4600780E-02
  -.5248706E-02  -.5571284E-02  -.5270481E-02  -.4317656E-02  -.3145048E-02
  -.2294422E-02  -.2062893E-02  -.2334153E-02  -.2676661E-02  -.2750759E-02
  -.2697118E-02  -.2916219E-02  -.3531554E-02  -.4202823E-02  -.4561222E-02
  -.4481301E-02  -.4225217E-02  -.4266326E-02  -.4705112E-02  -.5115444E-02
  -.5166586E-02  -.4797260E-02  -.4141052E-02  -.3648457E-02  -.3554877E-02
  -.3614720E-02  -.3586184E-02  -.3425042E-02  -.3274996E-02  -.3461121E-02
  -.4086498E-02  -.4923127E-02  -.5804555E-02  -.6357765E-02  -.6222636E-02
  -.5634881E-02  -.5054810E-02  -.4536645E-02  -.4184403E-02  -.4193313E-02
  -.4407922E-02  -.4389518E-02  -.4071550E-02  -.3968499E-02  -.4630305E-02
  -.5919269E-02  -.6950308E-02  -.6957732E-02  -.6017037E-02  -.4850300E-02
  -.4233971E-02  -.4408631E-02  -.4973164E-02  -.5585935E-02  -.6073592E-02
  -.6370462E-02  -.6469418E-02  -.6312687E-02  -.5825259E-02  -.4967217E-02
  -.3891834E-02  -.2973393E-02  -.2552026E-02  -.2567913E-02  -.2719536E-02
  -.3092047E-02  -.3482176E-02  -.3917621E-02  -.4113135E-02  -.4160692E-02
  -.4421203E-02  -.5116810E-02  -.5875501E-02  -.6131372E-02  -.5919737E-02
  -.5609932E-02  -.5243139E-02  -.4874368E-02  -.4690487E-02  -.4765251E-02
  -.4773831E-02  -.4077043E-02  -.2888776E-02  -.2345617E-02  -.2935551E-02
  -.3687715E-02  -.3436771E-02  -.2633247E-02  -.2866196E-02  -.4391308E-02
  -.5689579E-02  -.5275693E-02  -.3570366E-02  -.2221958E-02  -.2078250E-02
  -.2404496E-02  -.1911087E-02  -.6008635E-03   .2877869E-03   .2542178E-04
  -.7422681E-03  -.9632061E-03  -.6933913E-03  -.9183365E-03  -.1926470E-02
  -.2918912E-02  -.3182221E-02  -.2914957E-02  -.2672324E-02  -.2678557E-02
  -.2995858E-02  -.3629002E-02  -.4288298E-02  -.4446137E-02  -.4024133E-02
  -.3739227E-02  -.4063794E-02  -.4555144E-02  -.4619768E-02  -.4339820E-02
  -.4026549E-02  -.3611095E-02  -.2908311E-02  -.1869307E-02  -.7930929E-03
  -.8756915E-04   .2653685E-03   .5995370E-03   .1020591E-02   .1172062E-02
   .7800667E-03   .2590172E-03   .2244352E-03   .7701227E-03   .1195522E-02
   .9144689E-03   .2907034E-03  -.1354478E-03  -.4056278E-03  -.7049498E-03
  -.1071164E-02  -.1630922E-02  -.2178648E-02  -.2416320E-02  -.2247534E-02
  -.1907622E-02  -.1774090E-02  -.1877705E-02  -.2062723E-02  -.2202344E-02
  -.2323705E-02  -.2559893E-02  -.3028052E-02  -.3461241E-02  -.3519807E-02
  -.3189486E-02  -.2802850E-02  -.2718103E-02  -.2940064E-02  -.3176925E-02
  -.3086372E-02  -.2717194E-02  -.2268644E-02  -.1855578E-02  -.1481972E-02
  -.1214850E-02  -.1144689E-02  -.1325122E-02  -.1986950E-02  -.3214446E-02
  -.4677929E-02  -.5784335E-02  -.6092432E-02  -.5469881E-02  -.4212779E-02
  -.2830641E-02  -.1822401E-02  -.1455794E-02  -.1726923E-02  -.2481875E-02
  -.3583654E-02  -.4867739E-02  -.5904645E-02  -.6342129E-02  -.6063979E-02
  -.5271729E-02  -.4244323E-02  -.3169845E-02  -.2237960E-02  -.1633565E-02
  -.1443353E-02  -.1746423E-02  -.2662003E-02  -.3955356E-02  -.5025210E-02
  -.5283967E-02  -.4483405E-02  -.3193420E-02  -.2404571E-02  -.2564208E-02
  -.3234274E-02  -.3827676E-02  -.4231980E-02  -.4761845E-02  -.5566481E-02
  -.6276400E-02  -.6316356E-02  -.5452669E-02  -.4130590E-02  -.2995961E-02
  -.2263100E-02  -.1879291E-02  -.1911966E-02  -.2567100E-02  -.3612201E-02
  -.4442725E-02  -.4712824E-02  -.4613353E-02  -.4517549E-02  -.4457954E-02
  -.4049816E-02  -.3086574E-02  -.1927479E-02  -.1107098E-02  -.7841135E-03
  -.7223909E-03  -.7928335E-03  -.1062658E-02  -.1534643E-02  -.2049567E-02
  -.2498379E-02  -.2716109E-02  -.2514486E-02  -.1999166E-02  -.1510801E-02
  -.1150825E-02  -.7231201E-03  -.4027827E-04   .8154473E-03   .1391545E-02
   .1439911E-02   .1149342E-02   .6299859E-03  -.9302621E-04  -.9974170E-03
  -.1881506E-02  -.2494440E-02  -.2864108E-02  -.3204241E-02  -.3361899E-02
  -.2871246E-02  -.1885871E-02  -.1247749E-02  -.1495054E-02  -.2311792E-02
  -.3101021E-02  -.3691269E-02  -.4189866E-02  -.4562899E-02  -.4569376E-02
  -.4186289E-02  -.3710367E-02  -.3251047E-02  -.2645309E-02  -.1943356E-02
  -.1298231E-02  -.8515520E-03  -.7546253E-03  -.8341272E-03  -.7717900E-03
  -.6937978E-03  -.1053455E-02  -.2173042E-02  -.3807499E-02  -.5333023E-02
  -.6301870E-02  -.6684678E-02  -.6726970E-02  -.6324407E-02  -.5163214E-02
  -.3426937E-02  -.1632066E-02  -.8340766E-04   .9413403E-03   .1244528E-02
   .1110072E-02   .9294650E-03   .6173830E-03  -.2611436E-03  -.1838394E-02
  -.3559948E-02  -.4761052E-02  -.5229613E-02  -.5225528E-02  -.5197007E-02
  -.5281098E-02  -.5039667E-02  -.4074344E-02  -.2528692E-02  -.9813983E-03
   .1221529E-03   .9035837E-03   .1566810E-02   .1814631E-02   .1156444E-02
  -.4113478E-03  -.2420946E-02  -.4212352E-02  -.5245951E-02  -.5511379E-02
  -.5443160E-02  -.5506205E-02  -.5786572E-02  -.5843913E-02  -.5402946E-02
  -.4668247E-02  -.4150709E-02  -.4058475E-02  -.4355813E-02  -.5013410E-02
  -.5801537E-02  -.6301923E-02  -.6105807E-02  -.5217674E-02  -.4066443E-02
  -.3017968E-02  -.2363013E-02  -.2476720E-02  -.3363294E-02  -.4376637E-02
  -.4846019E-02  -.4855114E-02  -.4734820E-02  -.4626830E-02  -.4425381E-02
  -.4023564E-02  -.3401467E-02  -.2735841E-02  -.2307358E-02  -.2373849E-02
  -.3241720E-02  -.4658781E-02  -.5685021E-02  -.5443011E-02  -.3863938E-02
  -.1772110E-02  -.1030760E-03   .5940408E-03   .3584297E-03  -.4805194E-03
  -.1419578E-02  -.1935664E-02  -.1657914E-02  -.7362444E-03   .1882248E-03
   .5462104E-03   .2147370E-03  -.3984751E-03  -.7422796E-03  -.7547718E-03
  -.1058459E-02  -.2122952E-02  -.3559551E-02  -.4437881E-02  -.4132267E-02
  -.2882316E-02  -.1463610E-02  -.4679367E-03  -.1021636E-03  -.4930338E-03
  -.1620726E-02  -.2981106E-02  -.3671809E-02  -.3328919E-02  -.2697938E-02
  -.2741429E-02  -.3544073E-02  -.4328184E-02  -.4498292E-02  -.4347220E-02
  -.4448871E-02  -.4779803E-02  -.5078569E-02  -.5132026E-02  -.4546883E-02
  -.3191259E-02  -.1224564E-02   .9825416E-03   .2829357E-02   .3742785E-02
   .3376373E-02   .1810154E-02  -.3986791E-03  -.2570706E-02  -.4415293E-02
  -.5982505E-02  -.7091695E-02  -.7456808E-02  -.7173312E-02  -.6729513E-02
  -.6460068E-02  -.6278210E-02  -.5840028E-02  -.5072562E-02  -.4302328E-02
  -.3814912E-02  -.3524765E-02  -.3131987E-02  -.2468889E-02  -.1599477E-02
  -.7941449E-03  -.3513450E-03  -.3713929E-03  -.8384427E-03  -.1591948E-02
  -.2330996E-02  -.2748493E-02  -.2736339E-02  -.2534354E-02  -.2482634E-02
  -.2889740E-02  -.3841066E-02  -.4921831E-02  -.5581015E-02  -.5739283E-02
  -.5681061E-02  -.5706907E-02  -.5709453E-02  -.5194894E-02  -.3916161E-02
  -.2333205E-02  -.1242984E-02  -.8751233E-03  -.1027542E-02  -.1431214E-02
  -.2049850E-02  -.3181361E-02  -.4813926E-02  -.6439649E-02  -.7652707E-02
  -.8485489E-02  -.9026742E-02  -.9111577E-02  -.8502482E-02  -.7152685E-02
  -.5292907E-02  -.3459714E-02  -.2130477E-02  -.1293117E-02  -.7151671E-03
  -.3733713E-03  -.4240917E-03  -.9187442E-03  -.1738088E-02  -.2558828E-02
  -.3093053E-02  -.3393236E-02  -.3763285E-02  -.4243437E-02  -.4533675E-02
  -.4348656E-02  -.3761624E-02  -.3231153E-02  -.3216997E-02  -.3611819E-02
  -.3954971E-02  -.4018025E-02  -.3905912E-02  -.3767018E-02  -.3690598E-02
  -.3870059E-02  -.4451911E-02  -.5315178E-02  -.6152379E-02  -.6554842E-02
  -.6302445E-02  -.5685331E-02  -.5272264E-02  -.5006943E-02  -.4298567E-02
  -.3038172E-02  -.1934865E-02  -.1815156E-02  -.2762457E-02  -.4029428E-02
  -.4935426E-02  -.5281027E-02  -.5101686E-02  -.4739013E-02  -.4624260E-02
  -.4828875E-02  -.4943259E-02  -.4467752E-02  -.3311102E-02  -.2103526E-02
  -.1545062E-02  -.1642033E-02  -.1984059E-02  -.2204139E-02  -.2278678E-02
  -.2568832E-02  -.3413115E-02  -.4559645E-02  -.5391198E-02  -.5613005E-02
  -.5201077E-02  -.4110365E-02  -.2530570E-02  -.1085290E-02  -.4431292E-03
  -.7015169E-03  -.1424683E-02  -.2020638E-02  -.2091880E-02  -.1678473E-02
  -.1040625E-02  -.3627985E-03   .3292543E-03   .1046580E-02   .1782257E-02
   .2401936E-02   .2545567E-02   .1874284E-02   .4752405E-03  -.1259792E-02
  -.2712953E-02  -.3383638E-02  -.3252225E-02  -.2594244E-02  -.1585701E-02
  -.3742762E-03   .8194045E-03   .1756801E-02   .2298560E-02   .2436248E-02
   .2251472E-02   .1918796E-02   .1618295E-02   .1372754E-02   .1232785E-02
   .1216984E-02   .1319870E-02   .1528692E-02   .1729697E-02   .1786473E-02
   .1678553E-02   .1625319E-02   .1746490E-02   .1938170E-02   .2114252E-02
   .2223107E-02   .2312459E-02   .2353101E-02   .2329681E-02   .2279865E-02
   .2210395E-02   .2067719E-02   .1947429E-02   .2112649E-02   .2629244E-02
   .3314058E-02   .3928242E-02   .4341327E-02   .4538691E-02   .4670840E-02
   .4796836E-02   .4853660E-02   .4787052E-02   .4566929E-02   .4276620E-02
   .4101708E-02   .4148465E-02   .4402388E-02   .4771533E-02   .5183782E-02
   .5576862E-02   .5866985E-02   .5990262E-02   .5958094E-02   .5832160E-02
   .5693969E-02   .5469527E-02   .5048129E-02   .4525559E-02   .4030971E-02
   .3643144E-02   .3395754E-02   .3121689E-02   .2728919E-02   .2504132E-02
   .2704568E-02   .3183537E-02   .3704244E-02   .4246243E-02   .4699733E-02
   .4868549E-02   .4666500E-02   .4249090E-02   .3963276E-02   .4051020E-02
   .4396848E-02   .4589611E-02   .4574616E-02   .4658260E-02   .4957808E-02
   .5439263E-02   .6041353E-02   .6602870E-02   .6793030E-02   .6426712E-02
   .5744306E-02   .5197752E-02   .4875113E-02   .4531695E-02   .4204334E-02
   .4170486E-02   .4335763E-02   .4378891E-02   .4291172E-02   .4301127E-02
   .4581920E-02   .4987664E-02   .5281778E-02   .5470257E-02   .5759080E-02
   .6125393E-02   .6398842E-02   .6394829E-02   .6020430E-02   .5303438E-02
   .4342490E-02   .3414351E-02   .2996944E-02   .3364042E-02   .4216326E-02
   .4997479E-02   .5537228E-02   .6106954E-02   .6833427E-02   .7454314E-02
   .7694937E-02   .7604096E-02   .7314543E-02   .6786428E-02   .6117461E-02
   .5605759E-02   .5461059E-02   .5566983E-02   .5710059E-02   .5810232E-02
   .5929763E-02   .5976665E-02   .5862442E-02   .5684386E-02   .5653872E-02
   .5767034E-02   .5856724E-02   .5897923E-02   .5835535E-02   .5684967E-02
   .5619424E-02   .5793828E-02   .6220487E-02   .6831237E-02   .7470387E-02
   .7853014E-02   .7845703E-02   .7519564E-02   .7115218E-02   .6787007E-02
   .6370499E-02   .5672291E-02   .4878702E-02   .4446490E-02   .4537453E-02
   .4869988E-02   .5122291E-02   .5143198E-02   .4966745E-02   .4809103E-02
   .4897294E-02   .5207764E-02   .5604391E-02   .5972191E-02   .6221823E-02
   .6266897E-02   .6262235E-02   .6539798E-02   .7208621E-02   .8020425E-02
   .8668419E-02   .9054645E-02   .9113317E-02   .8646321E-02   .7697318E-02
   .6772123E-02   .6465681E-02   .6752327E-02   .6845765E-02   .6206576E-02
   .5288789E-02   .4838340E-02   .4930403E-02   .4885937E-02   .4261689E-02
   .3466782E-02   .3027145E-02   .2920187E-02   .2837635E-02   .2708235E-02
   .2833293E-02   .3344111E-02   .3810628E-02   .3819791E-02   .3550950E-02
   .3467116E-02   .3871566E-02   .4528044E-02   .4873618E-02   .4652427E-02
   .4022824E-02   .3478677E-02   .3381424E-02   .3587714E-02   .3630551E-02
   .3345442E-02   .3101982E-02   .3283719E-02   .3874298E-02   .4583082E-02
   .5131205E-02   .5372634E-02   .5264675E-02   .4976101E-02   .4687978E-02
   .4480161E-02   .4247571E-02   .3794050E-02   .3241012E-02   .2958076E-02
   .2951440E-02   .2899286E-02   .2759412E-02   .2795933E-02   .3094620E-02
   .3391549E-02   .3404262E-02   .3260423E-02   .3231033E-02   .3330485E-02
   .3399124E-02   .3394902E-02   .3277762E-02   .3002270E-02   .2660026E-02
   .2314693E-02   .2003140E-02   .1779564E-02   .1719290E-02   .1860595E-02
   .2142533E-02   .2484889E-02   .2792474E-02   .3048438E-02   .3218752E-02
   .3238275E-02   .3159576E-02   .3160362E-02   .3326207E-02   .3553537E-02
   .3650393E-02   .3509989E-02   .3201097E-02   .2926844E-02   .2946395E-02
   .3222670E-02   .3475326E-02   .3646621E-02   .3806961E-02   .3941801E-02
   .3953040E-02   .3867114E-02   .3673162E-02   .3429515E-02   .3354783E-02
   .3369102E-02   .3158604E-02   .2726545E-02   .2443019E-02   .2565887E-02
   .2987425E-02   .3477807E-02   .3958971E-02   .4380254E-02   .4746097E-02
   .4909027E-02   .4599797E-02   .3876883E-02   .3029397E-02   .2403368E-02
   .2231973E-02   .2443681E-02   .2649875E-02   .2425983E-02   .1799841E-02
   .1202018E-02   .8695422E-03   .7652553E-03   .7832607E-03   .9208761E-03
   .1246064E-02   .1728260E-02   .2160826E-02   .2280230E-02   .2053330E-02
   .1540450E-02   .7999107E-03   .1374842E-04  -.5148338E-03  -.6570022E-03
  -.5302249E-03  -.2756953E-03   .9059372E-04   .5433126E-03   .1026789E-02
   .1521214E-02   .1935054E-02   .2155839E-02   .2133104E-02   .1909137E-02
   .1630882E-02   .1443194E-02   .1375450E-02   .1452169E-02   .1687064E-02
   .2042876E-02   .2302135E-02   .2219675E-02   .1820284E-02   .1397680E-02
   .1233978E-02   .1292428E-02   .1250120E-02   .1017897E-02   .9358430E-03
   .1244204E-02   .1765489E-02   .2072521E-02   .1952476E-02   .1591530E-02
   .1273813E-02   .1147838E-02   .1159174E-02   .1119285E-02   .9369938E-03
   .7586531E-03   .8393292E-03   .1240892E-02   .1696630E-02   .1975076E-02
   .2021714E-02   .1841968E-02   .1538358E-02   .1259819E-02   .1061403E-02
   .9378724E-03   .7959124E-03   .5501065E-03   .3218237E-03   .2078633E-03
   .1180008E-03  -.4039902E-04  -.2476289E-03  -.3655241E-03  -.3867342E-03
  -.4809638E-03  -.6900513E-03  -.8639213E-03  -.8627310E-03  -.6768724E-03
  -.3263275E-03   .2235688E-03   .9066673E-03   .1357236E-02   .1223732E-02
   .6615240E-03   .1933559E-03   .1108663E-03   .2564168E-03   .3451138E-03
   .2976037E-03   .2964166E-03   .4644439E-03   .7613341E-03   .1105414E-02
   .1437602E-02   .1670464E-02   .1768470E-02   .1749692E-02   .1604810E-02
   .1413062E-02   .1293845E-02   .1314460E-02   .1428303E-02   .1508488E-02
   .1468011E-02   .1296983E-02   .1078892E-02   .9957848E-03   .1116310E-02
   .1291940E-02   .1342738E-02   .1306795E-02   .1277486E-02   .1163217E-02
   .8430417E-03   .3061746E-03  -.2102236E-03  -.5503729E-03  -.7236027E-03
  -.7721434E-03  -.7296927E-03  -.5868069E-03  -.3486539E-03  -.5218851E-04
   .2988168E-03   .5982519E-03   .6576598E-03   .4528007E-03   .1558731E-03
  -.1602939E-03  -.5854992E-03  -.1058443E-02  -.1389552E-02  -.1520251E-02
  -.1457667E-02  -.1182367E-02  -.7554454E-03  -.3809719E-03  -.2359095E-03
  -.2386887E-03  -.1976428E-03  -.7752389E-04   .5732143E-05  -.3423217E-04
  -.1397953E-03  -.1833456E-03  -.1415595E-03  -.1049548E-03  -.1278178E-03
  -.1982619E-03  -.2320958E-03  -.1754942E-03  -.9158916E-04  -.5935342E-04
  -.8533191E-04  -.1257919E-03  -.2169438E-03  -.4274543E-03  -.6578979E-03
  -.7816162E-03  -.8598600E-03  -.9996849E-03  -.1204074E-02  -.1373512E-02
  -.1445983E-02  -.1458686E-02  -.1376600E-02  -.1200877E-02  -.1052958E-02
  -.1059913E-02  -.1230992E-02  -.1409362E-02  -.1424469E-02  -.1289936E-02
  -.1176614E-02  -.1209298E-02  -.1412174E-02  -.1725161E-02  -.2100019E-02
  -.2509232E-02  -.2883628E-02  -.3160880E-02  -.3305687E-02  -.3294892E-02
  -.3123732E-02  -.2801317E-02  -.2357813E-02  -.1942456E-02  -.1728044E-02
  -.1800045E-02  -.2065178E-02  -.2339674E-02  -.2531215E-02  -.2678126E-02
  -.2803394E-02  -.2887259E-02  -.2866005E-02  -.2727919E-02  -.2583844E-02
  -.2491165E-02  -.2469317E-02  -.2548704E-02  -.2728917E-02  -.2948349E-02
  -.3089933E-02  -.3107274E-02  -.3064866E-02  -.3075412E-02  -.3178793E-02
  -.3331041E-02  -.3481560E-02  -.3504295E-02  -.3259800E-02  -.2706879E-02
  -.2013479E-02  -.1549412E-02  -.1556508E-02  -.1963953E-02  -.2542586E-02
  -.3044395E-02  -.3338443E-02  -.3494778E-02  -.3533832E-02  -.3360686E-02
  -.2964617E-02  -.2476851E-02  -.2086050E-02  -.1892251E-02  -.1895540E-02
  -.2030621E-02  -.2338146E-02  -.2928711E-02  -.3585176E-02  -.3826650E-02
  -.3441495E-02  -.2692887E-02  -.1956227E-02  -.1483916E-02  -.1485212E-02
  -.1923938E-02  -.2347921E-02  -.2285412E-02  -.1925656E-02  -.1896144E-02
  -.2307765E-02  -.2570558E-02  -.2204639E-02  -.1404196E-02  -.6148982E-03
  -.1168729E-03  -.5340776E-04  -.4465532E-03  -.1112937E-02  -.1672533E-02
  -.1895407E-02  -.1899043E-02  -.2022103E-02  -.2383193E-02  -.2720124E-02
  -.2737539E-02  -.2453982E-02  -.2125037E-02  -.1964916E-02  -.2003265E-02
  -.2085116E-02  -.2089697E-02  -.2022529E-02  -.1921333E-02  -.1852191E-02
  -.1850691E-02  -.1866116E-02  -.1836957E-02  -.1759968E-02  -.1628299E-02
  -.1467515E-02  -.1301038E-02  -.1121823E-02  -.9380986E-03  -.8217022E-03
  -.7534944E-03  -.6395113E-03  -.5015271E-03  -.4467289E-03  -.4759292E-03
  -.4502697E-03  -.3560632E-03  -.3121398E-03  -.3970704E-03  -.5662240E-03
  -.7346060E-03  -.8660667E-03  -.9679641E-03  -.1011111E-02  -.9081885E-03
  -.6429395E-03  -.2979160E-03  -.2835586E-04   .1290893E-03   .2556993E-03
   .3734713E-03   .4456959E-03   .3745953E-03   .1230572E-03  -.2000190E-03
  -.4917769E-03  -.7327186E-03  -.9170541E-03  -.1026090E-02  -.1003363E-02
  -.8490312E-03  -.6961368E-03  -.6136942E-03  -.5151062E-03  -.3359136E-03
  -.1409543E-03   .1852268E-04   .1581583E-03   .2842076E-03   .3658146E-03
   .4416839E-03   .5657202E-03   .6905721E-03   .7520101E-03   .7400243E-03
   .6805032E-03   .6164498E-03   .5700115E-03   .5392904E-03   .5012180E-03
   .3889670E-03   .1755754E-03  -.2684321E-04  -.1485818E-03  -.2846982E-03
  -.5438571E-03  -.8606015E-03  -.1099317E-02  -.1196073E-02  -.1148978E-02
  -.9996006E-03  -.7337325E-03  -.4001281E-03  -.2047429E-03  -.2570060E-03
  -.4127688E-03  -.4730835E-03  -.4361826E-03  -.4288461E-03  -.5178374E-03
  -.6364849E-03  -.6827055E-03  -.6240608E-03  -.4582910E-03  -.2074639E-03
   .4241953E-04   .1946326E-03   .2742363E-03   .3446744E-03   .4581209E-03
   .5910420E-03   .6114192E-03   .4457373E-03   .2106129E-03   .7153396E-04
   .1338745E-04  -.9318970E-04  -.2657418E-03  -.3832560E-03  -.4128215E-03
  -.4339008E-03  -.4863400E-03  -.5368701E-03  -.5290629E-03  -.4183942E-03
  -.1591668E-03   .2015515E-03   .4470907E-03   .4099655E-03   .1756383E-03
  -.3021578E-04  -.1410007E-03  -.2882957E-03  -.5628794E-03  -.8209558E-03
  -.8643658E-03  -.7267099E-03  -.5862797E-03  -.4828961E-03  -.2689040E-03
   .7535948E-04   .3514366E-03   .4015338E-03   .3214775E-03   .2562155E-03
   .1840779E-03   .5148214E-04  -.9748262E-04  -.1844304E-03  -.2336299E-03
  -.2973852E-03  -.3175082E-03  -.2477074E-03  -.1418487E-03  -.9471429E-04
  -.8892742E-04   .6140724E-05   .1782800E-03   .2818495E-03   .2711616E-03
   .2366701E-03   .2521370E-03   .3083527E-03   .3650692E-03   .3986554E-03
   .3898530E-03   .3212036E-03   .2463558E-03   .2938160E-03   .5471794E-03
   .9340550E-03   .1269937E-02   .1442957E-02   .1470333E-02   .1359979E-02
   .1080676E-02   .6842638E-03   .3257315E-03   .1198110E-03  -.2083980E-04
  -.2292306E-03  -.4072354E-03  -.3077211E-03   .1007988E-03   .5271743E-03
   .7236305E-03   .7313216E-03   .6881218E-03   .6341366E-03   .5735957E-03
   .5746431E-03   .6386895E-03   .6302729E-03   .4269946E-03   .9949104E-04
  -.1242327E-03  -.1281215E-03  -.7183892E-04  -.1360776E-03  -.2602656E-03
  -.2885142E-03  -.2019873E-03  -.1094103E-03  -.6205090E-04   .5846682E-05
   .1080807E-03   .1387501E-03   .6052539E-04  -.5819264E-04  -.1460575E-03
  -.1573453E-03  -.1216010E-03  -.9717526E-04  -.7331675E-04  -.1877492E-05
   .1313409E-03   .2808198E-03   .3992293E-03   .4572770E-03   .4517305E-03
   .4188853E-03   .3890810E-03   .3185967E-03   .1457895E-03  -.1480340E-03
  -.4904033E-03  -.7504893E-03  -.8483106E-03  -.8105931E-03  -.7140564E-03
  -.6043507E-03  -.4944218E-03  -.3821033E-03  -.2532000E-03  -.1433187E-03
  -.8357943E-04  -.7057367E-04  -.1238852E-03  -.2543723E-03  -.4126886E-03
  -.5381366E-03  -.5798401E-03  -.5392200E-03  -.4433649E-03  -.3178201E-03
  -.2181030E-03  -.1896078E-03  -.1746429E-03  -.1038818E-03  -.1178014E-04
   .2820425E-05  -.9059417E-04  -.2135323E-03  -.2707750E-03  -.2415922E-03
  -.1794105E-03  -.1249510E-03  -.9569356E-04  -.1019704E-03  -.1330105E-03
  -.1815682E-03  -.2258005E-03  -.2495973E-03  -.2574363E-03  -.2547431E-03
  -.2359571E-03  -.1860895E-03  -.1246952E-03  -.1110954E-03  -.1706754E-03
  -.2660477E-03  -.3591637E-03  -.4422935E-03  -.5332832E-03  -.6260998E-03
  -.6629999E-03  -.6305365E-03  -.5866203E-03  -.5645012E-03  -.5495177E-03
  -.5269522E-03  -.5149082E-03  -.5362150E-03  -.5889279E-03  -.6464437E-03
  -.6894230E-03  -.7055606E-03  -.6948219E-03  -.6491016E-03  -.5581775E-03
  -.4519189E-03  -.3737183E-03  -.3314716E-03  -.3069479E-03  -.2929617E-03
  -.3166186E-03  -.3991767E-03  -.5071445E-03  -.5928592E-03  -.6376541E-03
  -.6602034E-03  -.6811942E-03  -.7052632E-03  -.7117045E-03  -.6719058E-03
  -.5897898E-03  -.5010382E-03  -.4469931E-03  -.4502647E-03  -.4801585E-03
  -.5132747E-03  -.5700147E-03  -.6552502E-03  -.7403118E-03  -.7849966E-03
  -.7701545E-03  -.7095051E-03  -.6471922E-03  -.6178394E-03  -.6066222E-03
  -.5734195E-03  -.5024490E-03  -.4269952E-03  -.3926906E-03  -.4102265E-03
  -.4523456E-03  -.4951291E-03  -.5383846E-03  -.5910309E-03  -.6494423E-03
  -.6982998E-03  -.7316312E-03  -.7559680E-03  -.7745372E-03  -.7681459E-03
  -.7220959E-03  -.6539652E-03  -.6046440E-03  -.5960222E-03  -.6117684E-03
  -.6171704E-03  -.6009207E-03  -.5833217E-03  -.5775282E-03  -.5805497E-03
  -.5930158E-03  -.6076808E-03  -.6101778E-03  -.5986926E-03  -.6007529E-03
  -.6358893E-03  -.6684885E-03  -.6430962E-03  -.5476877E-03  -.4298231E-03
  -.3697723E-03  -.4123612E-03  -.5178579E-03  -.6188394E-03  -.6866005E-03
  -.7182611E-03  -.7009308E-03  -.6319901E-03  -.5610495E-03  -.5573960E-03
  -.6205503E-03  -.6608031E-03  -.6233420E-03  -.5660178E-03  -.5708881E-03
  -.6410161E-03  -.7072304E-03  -.7128739E-03  -.6690872E-03  -.6297353E-03
  -.6308407E-03  -.6666773E-03  -.7006133E-03  -.7089883E-03  -.6927789E-03
  -.6508449E-03  -.5903865E-03  -.5452627E-03  -.5543813E-03  -.6031088E-03
  -.6395548E-03  -.6281569E-03  -.5848574E-03  -.5571473E-03  -.5727831E-03
  -.6303717E-03  -.7033625E-03  -.7528061E-03  -.7473342E-03  -.6913021E-03
  -.6256273E-03  -.5913907E-03  -.5955094E-03  -.6179481E-03  -.6219751E-03
  -.5880105E-03  -.5358359E-03  -.5014933E-03  -.5047637E-03  -.5331530E-03
  -.5614253E-03  -.5713007E-03  -.5573373E-03  -.5339685E-03  -.5209942E-03
  -.5178200E-03  -.5166529E-03  -.5093032E-03  -.4861450E-03  -.4415235E-03
  -.3955145E-03  -.3725671E-03  -.3760793E-03  -.3920204E-03  -.4131853E-03
  -.4339557E-03  -.4478022E-03  -.4529720E-03  -.4486596E-03  -.4340438E-03
  -.4098567E-03  -.3784350E-03  -.3454915E-03  -.3135094E-03  -.2818561E-03
  -.2548485E-03  -.2371957E-03  -.2254627E-03  -.2181875E-03  -.2198480E-03
  -.2226291E-03  -.2101316E-03  -.1837648E-03  -.1685288E-03  -.1831953E-03
  -.2142452E-03  -.2277920E-03  -.2142868E-03  -.1920522E-03  -.1801732E-03
  -.1808466E-03  -.1856619E-03  -.1867027E-03  -.1793579E-03  -.1672286E-03
  -.1539568E-03  -.1419380E-03  -.1296058E-03  -.1151474E-03  -.1033524E-03
  -.9623383E-04  -.8734164E-04  -.6973445E-04  -.5191889E-04  -.5173275E-04
  -.6714058E-04  -.8113356E-04  -.7997996E-04  -.6651171E-04  -.5745676E-04
  -.6286094E-04  -.7501910E-04  -.8430336E-04  -.9245981E-04  -.1036836E-03
  -.1144056E-03  -.1177685E-03  -.1112949E-03  -.9960436E-04  -.8926200E-04
  -.8272066E-04  -.7478800E-04  -.5858825E-04  -.4221196E-04  -.3813205E-04
  -.4488952E-04  -.5058101E-04  -.4576679E-04  -.3174295E-04  -.1518865E-04
  -.1067859E-05   .8253648E-05   .1064681E-04   .6609021E-05   .1554314E-05
  -.4151502E-05  -.1256566E-04  -.1881433E-04  -.1527202E-04  -.4479549E-05
   .3781116E-05   .6046830E-05   .9540682E-05   .2171463E-04   .4079974E-04
   .5606491E-04   .5648406E-04   .4122479E-04   .1966740E-04   .3685067E-05
  -.2606785E-05  -.6057963E-05  -.1061555E-04  -.9703561E-05  -.5350959E-06
   .1061468E-04   .1854699E-04   .2425955E-04   .3045651E-04   .3704883E-04
   .4119604E-04   .4070648E-04   .3672250E-04   .3555645E-04   .4022348E-04
   .4567010E-04   .4648444E-04   .4299299E-04   .3652806E-04   .2974593E-04
   .2512206E-04   .2350529E-04   .2458682E-04   .2645438E-04   .2843683E-04
   .3146257E-04   .3473553E-04   .3722251E-04   .3888884E-04   .3948582E-04
   .3921053E-04   .3714078E-04   .3260864E-04   .2663305E-04   .1996603E-04
   .1521056E-04   .1336850E-04   .1395208E-04   .1630730E-04   .1877599E-04
   .2162214E-04   .2753386E-04   .3758519E-04   .4609364E-04   .4352329E-04
   .2523472E-04   .3553825E-06  -.1313192E-04  -.8113720E-05   .2652737E-05
   .4090108E-05  -.5882591E-06   .3232038E-05   .2123684E-04   .4251160E-04
   .5279766E-04   .5162184E-04   .4840902E-04   .4789874E-04   .4685916E-04
   .4268968E-04   .3873685E-04   .3904415E-04   .4205512E-04   .4163448E-04
   .3699569E-04   .3418332E-04   .3652623E-04   .4113965E-04   .4366386E-04
   .4315356E-04   .4073446E-04   .3885128E-04   .3966740E-04   .4255578E-04
   .4456333E-04   .4369841E-04   .4121004E-04   .3998746E-04   .4062286E-04
   .4157474E-04   .4174937E-04   .4110864E-04   .3921429E-04   .3484674E-04
   .2896056E-04   .2462398E-04   .2446949E-04   .2797723E-04   .3208660E-04
   .3507772E-04   .3680742E-04   .3787387E-04   .3906574E-04   .4010927E-04
   .4004690E-04   .3853262E-04   .3657267E-04   .3539298E-04   .3621791E-04
   .3863059E-04   .4044107E-04   .4029415E-04   .3877114E-04   .3751942E-04
   .3751921E-04   .3802063E-04   .3802092E-04   .3757791E-04   .3719063E-04
   .3716592E-04   .3706308E-04   .3660254E-04   .3688934E-04   .3838159E-04
   .4021872E-04   .4165913E-04   .4250008E-04   .4313028E-04   .4380757E-04
   .4438193E-04   .4451431E-04   .4421469E-04   .4405129E-04   .4404475E-04
   .4351078E-04   .4197064E-04   .3943236E-04   .3659981E-04   .3437459E-04
   .3303525E-04   .3231464E-04   .3216780E-04   .3282472E-04   .3403459E-04
   .3537870E-04   .3622113E-04   .3609260E-04   .3529121E-04   .3436194E-04
   .3384525E-04   .3404900E-04   .3482932E-04   .3569214E-04   .3643073E-04
   .3741576E-04   .3843440E-04   .3882418E-04   .3852939E-04   .3791280E-04
   .3730773E-04   .3691711E-04   .3679983E-04   .3692705E-04   .3726669E-04
   .3768895E-04   .3798922E-04   .3805308E-04   .3792372E-04   .3753675E-04
   .3693783E-04   .3645236E-04   .3618168E-04   .3593775E-04   .3574363E-04
   .3577013E-04   .3610132E-04   .3659632E-04   .3700498E-04   .3715596E-04
   .3694463E-04   .3646343E-04   .3607342E-04   .3615870E-04   .3677354E-04
   .3765097E-04   .3839844E-04   .3882019E-04   .3907945E-04   .3950134E-04
   .4011027E-04   .4053477E-04   .4055653E-04   .4035224E-04   .4020505E-04
   .4022253E-04   .4026370E-04   .4021252E-04   .4017003E-04   .4021529E-04
   .4033423E-04   .4047892E-04   .4059716E-04   .4062620E-04   .4065168E-04
   .4081747E-04   .4103055E-04   .4103954E-04   .4076925E-04   .4046540E-04
   .4040424E-04   .4062900E-04   .4098139E-04   .4128247E-04   .4149849E-04
   .4170755E-04   .4188708E-04   .4194009E-04   .4183115E-04   .4165857E-04
   .4154230E-04   .4145083E-04   .4129704E-04   .4114472E-04   .4111683E-04
   .4123851E-04   .4141664E-04   .4156070E-04   .4165810E-04   .4169432E-04
   .4163612E-04   .4151644E-04   .4145733E-04   .4154577E-04   .4171677E-04
   .4182691E-04   .4180465E-04   .4170550E-04   .4162607E-04   .4160336E-04
   .4161543E-04   .4161332E-04   .4155948E-04   .4146453E-04   .4138514E-04
   .4137035E-04   .4141398E-04   .4146520E-04   .4148156E-04   .4146797E-04
   .4144563E-04   .4141218E-04   .4135665E-04   .4129821E-04   .4126679E-04
   .4126774E-04   .4127341E-04   .4125645E-04   .4122139E-04   .4118756E-04
   .4117075E-04   .4116973E-04   .4116025E-04   .4111858E-04   .4104791E-04
   .4097414E-04   .4091993E-04   .4088396E-04   .4084877E-04   .4080125E-04
   .4074271E-04   .4067970E-04   .4061098E-04   .4053141E-04   .4044109E-04
   .4034961E-04   .4026725E-04   .4019449E-04   .4012487E-04   .4005249E-04
   .3997639E-04   .3989824E-04   .3981638E-04   .3972746E-04   .3963213E-04
   .3953415E-04   .3943584E-04   .3933690E-04   .3923640E-04   .3913426E-04
   .3903063E-04   .3892519E-04   .3881749E-04   .3870743E-04   .3859502E-04
   .3848018E-04   .3836306E-04   .3824381E-04   .3812252E-04   .3799928E-04
   .3787425E-04   .3774762E-04   .3761936E-04   .3748933E-04   .3735750E-04
   .3722397E-04   .3708871E-04   .3695168E-04   .3681284E-04   .3667225E-04
   .3652999E-04   .3638608E-04   .3624051E-04   .3609327E-04   .3594439E-04
   .3579387E-04   .3564172E-04   .3548795E-04   .3533256E-04   .3517556E-04
