# Supplementary material for: Earthquake Response Analysis of Tall Reinforced Concrete Chimneys considering Eccentricity
Source: Hindawi journal article supplement (doi:10.1155/2020/1417969), 2020-03-11
Supplement: f1 [file 1417969.f1.zip › 1417969.f1/Four kinds of earthquake records/Stiff soil/MORGAN G03-UP.txt]

PEER STRONG MOTION DATABASE RECORD. PROCESSING BY PACIFIC ENGINEERING.
MORGAN HILL 04/24/84 04:24, GILROY ARRAY #3,  UP (CDMG STATION 47381)
ACCELERATION TIME HISTORY IN UNITS OF G. FILTER POINTS: HP=0.1 Hz LP=42.0 Hz
NPTS=  7996, DT= .00500 SEC
  -.2881063E-04  -.3136394E-04  -.2641901E-04  -.2169922E-04  -.2207339E-04
  -.3022542E-04  -.4076366E-04  -.5437551E-04  -.8304663E-04  -.1315192E-03
  -.1898088E-03  -.2443262E-03  -.3066979E-03  -.3891846E-03  -.4792173E-03
  -.5439340E-03  -.5759275E-03  -.5839905E-03  -.5640626E-03  -.4812931E-03
  -.3111472E-03  -.6725625E-04   .2074115E-03   .4630624E-03   .6537934E-03
   .7739975E-03   .7884525E-03   .6907221E-03   .4939030E-03   .2764404E-03
   .8443336E-04  -.7784615E-04  -.1999300E-03  -.3070601E-03  -.4302143E-03
  -.5345352E-03  -.6974710E-03  -.9169316E-03  -.1108757E-02  -.1309135E-02
  -.1372349E-02  -.1220383E-02  -.8834169E-03  -.3208650E-03   .3519848E-03
   .9748665E-03   .1400945E-02   .1687647E-02   .1692688E-02   .1253199E-02
   .4382042E-03  -.5592797E-03  -.1576538E-02  -.2238196E-02  -.2651785E-02
  -.2985959E-02  -.2927911E-02  -.2384216E-02  -.1677921E-02  -.9620421E-03
  -.3801441E-03  -.1588616E-03  -.2380967E-03  -.2722895E-03  -.1588712E-03
   .6264962E-04   .6574270E-03   .1436689E-02   .1734356E-02   .8666154E-03
  -.1079094E-02  -.3049625E-02  -.4464693E-02  -.4702481E-02  -.3149721E-02
  -.1303722E-03   .2558881E-02   .4016897E-02   .4494378E-02   .3736467E-02
   .1417110E-02  -.1222549E-02  -.3387460E-02  -.4768953E-02  -.5110280E-02
  -.4899444E-02  -.4294606E-02  -.2907516E-02  -.4489507E-03   .2530071E-02
   .4772122E-02   .5154728E-02   .3673212E-02   .1320334E-02  -.1448715E-02
  -.3476565E-02  -.4549641E-02  -.4147326E-02  -.9736894E-03   .4415375E-02
   .1024165E-01   .1621748E-01   .2132660E-01   .2294455E-01   .2006342E-01
   .1318747E-01   .3493690E-02  -.6118110E-02  -.1191670E-01  -.1289296E-01
  -.1004388E-01  -.5000910E-02   .4328982E-03   .5116087E-02   .7951118E-02
   .8218353E-02   .6024463E-02   .3208343E-02   .6738569E-03  -.1034714E-02
  -.1453404E-02  -.7897769E-03  -.4781995E-03  -.3046738E-02  -.8213659E-02
  -.1373645E-01  -.1621724E-01  -.1411533E-01  -.9374784E-02  -.4841900E-02
  -.1675662E-02   .1068104E-02   .3445914E-02   .5361026E-02   .7858187E-02
   .1138900E-01   .1577075E-01   .2057289E-01   .2522833E-01   .2672138E-01
   .2362774E-01   .1801978E-01   .1052232E-01   .2167059E-02  -.4957252E-02
  -.9633437E-02  -.1215505E-01  -.1356714E-01  -.1514597E-01  -.1682241E-01
  -.1738290E-01  -.1570162E-01  -.1079153E-01  -.4138798E-02   .1084442E-02
   .3451599E-02   .4469613E-02   .5796563E-02   .8169261E-02   .1034999E-01
   .9959836E-02   .7167151E-02   .4056225E-02   .1783166E-02  -.1745341E-03
  -.2564019E-02  -.5393661E-02  -.8263460E-02  -.1093847E-01  -.1249828E-01
  -.9937175E-02  -.2266620E-02   .5412319E-02   .6839867E-02   .1852752E-03
  -.9555936E-02  -.1622180E-01  -.1860058E-01  -.1874816E-01  -.1824532E-01
  -.1834922E-01  -.1899498E-01  -.2123965E-01  -.2452199E-01  -.2624203E-01
  -.2557379E-01  -.1970631E-01  -.6865618E-02   .1256264E-01   .3343389E-01
   .4848359E-01   .5296263E-01   .4662782E-01   .3365462E-01   .1821753E-01
   .4162726E-02  -.9276656E-02  -.1967610E-01  -.2501599E-01  -.2562929E-01
  -.2327837E-01  -.1947149E-01  -.1695182E-01  -.1584318E-01  -.1636116E-01
  -.1920079E-01  -.2356237E-01  -.3014333E-01  -.4026932E-01  -.5321168E-01
  -.6440838E-01  -.6950190E-01  -.6714250E-01  -.5850159E-01  -.4548544E-01
  -.3041086E-01  -.1618639E-01  -.1523223E-02   .1255995E-01   .2005248E-01
   .1448476E-01  -.6969551E-02  -.4146563E-01  -.8402945E-01  -.1325541E+00
  -.1836552E+00  -.2272973E+00  -.2523804E+00  -.2480619E+00  -.1995764E+00
  -.8533296E-01   .6972166E-01   .2252766E+00   .3402839E+00   .3663560E+00
   .3372082E+00   .2976002E+00   .2126601E+00   .9276941E-01   .2176366E-01
   .2823230E-01   .7678298E-01   .1332933E+00   .1791060E+00   .1943129E+00
   .1571997E+00   .4041627E-01  -.1051146E+00  -.2228782E+00  -.3051434E+00
  -.3525861E+00  -.3522600E+00  -.3035387E+00  -.2103264E+00  -.9775706E-01
   .3836968E-02   .3578779E-01   .4658633E-02  -.2579721E-01  -.2017120E-01
   .2348423E-01   .1022697E+00   .2257903E+00   .3541454E+00   .3952829E+00
   .3584598E+00   .3011191E+00   .2253601E+00   .1445430E+00   .8316699E-01
   .3733122E-01  -.2784922E-02  -.3091383E-01  -.4107839E-01  -.3955425E-01
  -.4261116E-01  -.5953285E-01  -.8477652E-01  -.1062869E+00  -.1205491E+00
  -.1306218E+00  -.1366488E+00  -.1368121E+00  -.1280631E+00  -.1078516E+00
  -.7616337E-01  -.3776244E-01  -.2003612E-02   .1978005E-01   .2543850E-01
   .2621875E-01   .3386359E-01   .5017955E-01   .6345545E-01   .5843356E-01
   .3592754E-01   .1733965E-01   .2401736E-01   .5315376E-01   .7963503E-01
   .8606064E-01   .7947534E-01   .8110605E-01   .1031264E+00   .1366196E+00
   .1597189E+00   .1493309E+00   .9638434E-01   .1905584E-01  -.4724882E-01
  -.8636269E-01  -.1061942E+00  -.1163353E+00  -.1231382E+00  -.1291490E+00
  -.1349323E+00  -.1377069E+00  -.1325453E+00  -.1184321E+00  -.9627448E-01
  -.6384606E-01  -.1984948E-01   .3370270E-01   .8911424E-01   .1344985E+00
   .1547172E+00   .1467028E+00   .1160662E+00   .7435775E-01   .3367218E-01
   .2709746E-02  -.1453590E-01  -.1939911E-01  -.1470588E-01  -.9587725E-03
   .1901754E-01   .3530084E-01   .3775215E-01   .2486823E-01   .4677064E-02
  -.1773029E-01  -.4161954E-01  -.6267475E-01  -.7166930E-01  -.6175697E-01
  -.4089139E-01  -.2666275E-01  -.2808993E-01  -.4047991E-01  -.5042537E-01
  -.4852527E-01  -.3628079E-01  -.2303477E-01  -.1273698E-01  -.2305367E-02
   .8333246E-02   .1281209E-01   .3249190E-02  -.1618292E-01  -.2816850E-01
  -.1530910E-01   .2294630E-01   .6734863E-01   .9565733E-01   .9965482E-01
   .8801070E-01   .7092119E-01   .4797477E-01   .1398100E-01  -.2770817E-01
  -.6564375E-01  -.8761950E-01  -.9072582E-01  -.8194181E-01  -.7537889E-01
  -.8048742E-01  -.9223958E-01  -.1013148E+00  -.9863276E-01  -.8125846E-01
  -.5306022E-01  -.2115181E-01   .7178904E-02   .2754133E-01   .3795700E-01
   .3603410E-01   .2385607E-01   .9900250E-02   .3023080E-02   .6319264E-02
   .1968235E-01   .4277436E-01   .6728321E-01   .8026633E-01   .7998471E-01
   .6630783E-01   .3973049E-01   .4824475E-02  -.2917425E-01  -.4994721E-01
  -.5657443E-01  -.5339874E-01  -.4161562E-01  -.2418744E-01  -.5388350E-02
   .1080320E-01   .1945895E-01   .2039147E-01   .1434937E-01  -.1407532E-02
  -.2811426E-01  -.5958443E-01  -.8689740E-01  -.1008244E+00  -.9843031E-01
  -.8445122E-01  -.5772400E-01  -.2261940E-01   .1559325E-01   .4829490E-01
   .6660748E-01   .7340103E-01   .7131280E-01   .6164254E-01   .4974261E-01
   .4185451E-01   .4071258E-01   .4349730E-01   .4516044E-01   .4162978E-01
   .3394374E-01   .2561239E-01   .1809741E-01   .1328933E-01   .1406954E-01
   .2012136E-01   .2901324E-01   .3654890E-01   .3381297E-01   .1511950E-01
  -.1656515E-01  -.5157932E-01  -.7693830E-01  -.8750462E-01  -.8633193E-01
  -.7772304E-01  -.6409911E-01  -.4568336E-01  -.2891749E-01  -.2061992E-01
  -.1946826E-01  -.1755505E-01  -.6320576E-02   .1566383E-01   .4203065E-01
   .6191459E-01   .7101635E-01   .7497512E-01   .7810704E-01   .7978375E-01
   .7790282E-01   .7355134E-01   .6798470E-01   .5929864E-01   .4450460E-01
   .2169718E-01  -.5807138E-02  -.3051775E-01  -.5002082E-01  -.6667770E-01
  -.8067740E-01  -.8825093E-01  -.8493166E-01  -.6814636E-01  -.4239595E-01
  -.1605525E-01   .8051647E-02   .3213788E-01   .5445967E-01   .7072009E-01
   .7582527E-01   .6847764E-01   .5471259E-01   .3999690E-01   .2570131E-01
   .1183333E-01  -.2520756E-02  -.1365062E-01  -.1754860E-01  -.1355948E-01
  -.3685639E-02   .7499962E-02   .1453696E-01   .1733781E-01   .1956889E-01
   .2195492E-01   .2242508E-01   .1934995E-01   .1220167E-01   .2177496E-02
  -.8875014E-02  -.1656638E-01  -.1786784E-01  -.1216255E-01  -.6910708E-02
  -.9603110E-02  -.2023198E-01  -.3451133E-01  -.4617938E-01  -.4976464E-01
  -.4539795E-01  -.3674804E-01  -.2796869E-01  -.2076658E-01  -.1400201E-01
  -.8833082E-02  -.5501016E-02  -.1514591E-02   .3336507E-02   .7512481E-02
   .1222962E-01   .1918832E-01   .2757561E-01   .3499821E-01   .3489373E-01
   .2286656E-01   .3726941E-02  -.1130664E-01  -.1728453E-01  -.1676846E-01
  -.1630101E-01  -.1976405E-01  -.2517431E-01  -.2858384E-01  -.2767336E-01
  -.2218207E-01  -.1469915E-01  -.6825919E-02   .9670870E-03   .9168836E-02
   .1731209E-01   .2282628E-01   .2672174E-01   .2948532E-01   .3039512E-01
   .2811092E-01   .2205028E-01   .1339205E-01   .3038563E-02  -.6147622E-02
  -.1189056E-01  -.1497044E-01  -.1802973E-01  -.2242705E-01  -.2562484E-01
  -.2426705E-01  -.1729845E-01  -.7480662E-02   .2205733E-02   .1064842E-01
   .1752240E-01   .2216184E-01   .2316313E-01   .1939021E-01   .1367728E-01
   .7894043E-02   .3195110E-02  -.1156573E-02  -.7354103E-02  -.1443763E-01
  -.2083291E-01  -.2440490E-01  -.2452697E-01  -.2229676E-01  -.1798175E-01
  -.1033569E-01  -.1212066E-02   .6118269E-02   .7270767E-02   .2013240E-02
  -.6066309E-02  -.1332351E-01  -.1717032E-01  -.1447743E-01  -.3987630E-02
   .7690921E-02   .1306320E-01   .9723369E-02   .1023466E-02  -.6403898E-02
  -.1045642E-01  -.1273453E-01  -.1413004E-01  -.1129930E-01  -.2997312E-02
   .7945517E-02   .1529349E-01   .1343764E-01   .3628948E-02  -.7596734E-02
  -.1566806E-01  -.1921173E-01  -.2100741E-01  -.2369719E-01  -.2913568E-01
  -.3611050E-01  -.4212963E-01  -.4638196E-01  -.4748943E-01  -.4263430E-01
  -.3140396E-01  -.1633578E-01  -.4130868E-03   .1348307E-01   .2322316E-01
   .2548618E-01   .2015577E-01   .1366038E-01   .1166077E-01   .1439803E-01
   .2002095E-01   .2606755E-01   .3156794E-01   .3427652E-01   .3182046E-01
   .2138515E-01   .6744542E-02  -.3925397E-02  -.6328854E-02  -.1168261E-02
   .5836886E-02   .8956743E-02   .8759764E-02   .9263018E-02   .1497875E-01
   .2464799E-01   .3350814E-01   .3807382E-01   .3823875E-01   .3624056E-01
   .3500403E-01   .3721097E-01   .4199699E-01   .4550618E-01   .4384551E-01
   .3722941E-01   .2811652E-01   .1659200E-01   .2331795E-02  -.1529626E-01
  -.3246693E-01  -.4353689E-01  -.4719451E-01  -.4270862E-01  -.3473676E-01
  -.2941682E-01  -.2748873E-01  -.2807284E-01  -.3123842E-01  -.3524047E-01
  -.3710369E-01  -.3518835E-01  -.3238235E-01  -.3120058E-01  -.3069545E-01
  -.2804997E-01  -.2097381E-01  -.1137252E-01  -.3560224E-02  -.5485167E-03
  -.3622996E-03   .3505091E-02   .1692421E-01   .3517292E-01   .4726369E-01
   .5017572E-01   .4701923E-01   .4269709E-01   .4097367E-01   .4152101E-01
   .4209472E-01   .4073942E-01   .3729666E-01   .3341418E-01   .2954457E-01
   .2467397E-01   .1902557E-01   .1430411E-01   .1137728E-01   .8846590E-02
   .4499840E-02  -.2816472E-02  -.1265822E-01  -.2434790E-01  -.3414338E-01
  -.4185246E-01  -.4757966E-01  -.5191948E-01  -.5637198E-01  -.6120624E-01
  -.6544861E-01  -.7063202E-01  -.7736957E-01  -.8219579E-01  -.8221734E-01
  -.7597123E-01  -.6575753E-01  -.5658101E-01  -.4906035E-01  -.4243216E-01
  -.3539875E-01  -.2670445E-01  -.1722157E-01  -.8852952E-02  -.2555976E-02
   .4142690E-02   .1239032E-01   .1838836E-01   .1717217E-01   .9826104E-02
   .1682543E-02  -.4102737E-02  -.5476522E-02  -.1380678E-02   .8102795E-02
   .2150221E-01   .3524845E-01   .4749957E-01   .5360488E-01   .5265799E-01
   .4655460E-01   .3918474E-01   .3328871E-01   .2921170E-01   .2571279E-01
   .2316394E-01   .2211413E-01   .2307354E-01   .2586292E-01   .2878494E-01
   .3023713E-01   .3080092E-01   .3275335E-01   .3617816E-01   .4082779E-01
   .4535291E-01   .4853646E-01   .4849818E-01   .4346208E-01   .3569364E-01
   .3047009E-01   .3083351E-01   .3451826E-01   .3640662E-01   .3316019E-01
   .2463512E-01   .1242882E-01  -.1392018E-02  -.1489939E-01  -.2540613E-01
  -.2958577E-01  -.2528354E-01  -.1707132E-01  -.1215155E-01  -.1168019E-01
  -.1326767E-01  -.1574057E-01  -.1968519E-01  -.2715502E-01  -.3770109E-01
  -.4914436E-01  -.5832577E-01  -.6190610E-01  -.6011886E-01  -.5566834E-01
  -.5053504E-01  -.4537584E-01  -.4127340E-01  -.3855835E-01  -.3752699E-01
  -.3830193E-01  -.3949164E-01  -.3821491E-01  -.3349438E-01  -.2750236E-01
  -.2200896E-01  -.1698613E-01  -.1086084E-01  -.2186237E-02   .7156030E-02
   .1514017E-01   .2299656E-01   .3095774E-01   .3955143E-01   .5041628E-01
   .6314624E-01   .7401150E-01   .7997141E-01   .8177441E-01   .8084299E-01
   .7698990E-01   .6764365E-01   .5139541E-01   .3038275E-01   .9145341E-02
  -.5594831E-02  -.1297689E-01  -.1558220E-01  -.1630033E-01  -.1789652E-01
  -.2135881E-01  -.2459833E-01  -.2608110E-01  -.2759198E-01  -.3054948E-01
  -.3476666E-01  -.3852619E-01  -.3772763E-01  -.3234374E-01  -.2615830E-01
  -.2115247E-01  -.1643997E-01  -.1010652E-01  -.2515874E-02   .8004186E-03
  -.3767254E-03  -.1203241E-02   .1078810E-02   .4749328E-02   .5400048E-02
   .1648725E-02  -.3736154E-02  -.7501246E-02  -.7892386E-02  -.5488804E-02
  -.2106333E-02   .1014207E-02   .2340263E-02   .3002527E-02   .5407822E-02
   .9115598E-02   .1219339E-01   .1307988E-01   .1085802E-01   .5589739E-02
   .1002711E-02   .1563097E-03   .1946317E-02   .4749812E-02   .7116067E-02
   .8399954E-02   .1089936E-01   .1718058E-01   .2415436E-01   .2808364E-01
   .2832980E-01   .2592990E-01   .2151567E-01   .1516770E-01   .7977778E-02
   .8510699E-03  -.4192587E-02  -.8382654E-02  -.1237860E-01  -.1757301E-01
  -.2293121E-01  -.2702847E-01  -.2908353E-01  -.2807030E-01  -.2548812E-01
  -.2176411E-01  -.1662449E-01  -.1117861E-01  -.6912084E-02  -.3512411E-02
  -.9279620E-03   .4001968E-03   .3831974E-02   .1025066E-01   .1668777E-01
   .2066818E-01   .2223834E-01   .2259673E-01   .2435792E-01   .2601191E-01
   .2588590E-01   .2406679E-01   .2119804E-01   .1875348E-01   .1873804E-01
   .2025386E-01   .1921372E-01   .1380730E-01   .5143642E-02  -.6112580E-02
  -.1894409E-01  -.3289663E-01  -.4805291E-01  -.6000682E-01  -.6515523E-01
  -.6179385E-01  -.5243842E-01  -.4145263E-01  -.3095410E-01  -.2259114E-01
  -.1745365E-01  -.1454482E-01  -.1445298E-01  -.1517392E-01  -.1252791E-01
  -.7677534E-02  -.5209669E-02  -.7150190E-02  -.9362791E-02  -.6752870E-02
   .1197942E-02   .1123551E-01   .1995595E-01   .2495950E-01   .2646657E-01
   .2770197E-01   .3107398E-01   .3498422E-01   .3701362E-01   .3780581E-01
   .3964096E-01   .4345738E-01   .4557081E-01   .4120883E-01   .3053078E-01
   .1711000E-01   .2917197E-02  -.1012271E-01  -.2034721E-01  -.2563114E-01
  -.2563699E-01  -.2297926E-01  -.2240196E-01  -.2753892E-01  -.3640391E-01
  -.4404314E-01  -.4801259E-01  -.4723249E-01  -.4275612E-01  -.3677693E-01
  -.3102625E-01  -.2692844E-01  -.2456684E-01  -.2103429E-01  -.1362307E-01
  -.4119070E-02   .5777102E-02   .1463157E-01   .2173248E-01   .2817125E-01
   .3238798E-01   .3310658E-01   .3115792E-01   .2805547E-01   .2439329E-01
   .1980124E-01   .1360968E-01   .8271196E-02   .7217330E-02   .1251796E-01
   .2252578E-01   .3151608E-01   .3623476E-01   .3534534E-01   .3026733E-01
   .2298385E-01   .1585156E-01   .1074176E-01   .8237706E-02   .9836127E-02
   .1627971E-01   .2418925E-01   .2890815E-01   .2712830E-01   .2114669E-01
   .1422606E-01   .8536903E-02   .4912454E-02   .1560598E-02  -.1633115E-02
  -.4420302E-02  -.7354332E-02  -.1181830E-01  -.1789702E-01  -.2621377E-01
  -.3516724E-01  -.4098229E-01  -.4227003E-01  -.3969524E-01  -.3546436E-01
  -.3343713E-01  -.3486181E-01  -.3728608E-01  -.3853660E-01  -.3600774E-01
  -.2940675E-01  -.2203254E-01  -.1695158E-01  -.1503568E-01  -.1687160E-01
  -.2020186E-01  -.2146586E-01  -.1909845E-01  -.1537220E-01  -.1217747E-01
  -.7980889E-02  -.1405056E-02   .8043273E-02   .1702786E-01   .2187451E-01
   .2105444E-01   .1746961E-01   .1414330E-01   .1119996E-01   .7973046E-02
   .5260301E-02   .3231436E-02   .1253681E-02   .4027153E-03   .1903757E-02
   .4441568E-02   .5659302E-02   .4553003E-02   .1542044E-04  -.7863206E-02
  -.1658002E-01  -.2275909E-01  -.2445541E-01  -.2133553E-01  -.1416882E-01
  -.5524192E-02   .2570084E-02   .8398557E-02   .1139429E-01   .1199231E-01
   .9955111E-02   .7282394E-02   .6136237E-02   .8018919E-02   .1235029E-01
   .1525301E-01   .1398218E-01   .9330325E-02   .2970139E-02  -.3552491E-02
  -.7761974E-02  -.9308972E-02  -.9852643E-02  -.9946623E-02  -.8942494E-02
  -.6316581E-02  -.3565070E-02  -.3342788E-02  -.6908565E-02  -.1079914E-01
  -.8647561E-02   .2991411E-03   .1125969E-01   .2003811E-01   .2262351E-01
   .1884264E-01   .1171740E-01   .4308713E-02  -.1686747E-02  -.6316829E-02
  -.1016458E-01  -.1253564E-01  -.1311392E-01  -.1329702E-01  -.1493917E-01
  -.1898507E-01  -.2399535E-01  -.2774044E-01  -.2842784E-01  -.2730774E-01
  -.2700851E-01  -.2752520E-01  -.2646712E-01  -.2413785E-01  -.2228888E-01
  -.2059064E-01  -.1933157E-01  -.1724879E-01  -.1191332E-01  -.3337542E-02
   .5857008E-02   .1396859E-01   .2150655E-01   .2845253E-01   .3289766E-01
   .3172268E-01   .2507559E-01   .1446647E-01   .3947871E-02  -.2567783E-02
  -.5056619E-02  -.3526219E-02   .7602128E-03   .5751304E-02   .1156356E-01
   .1892077E-01   .2614849E-01   .2947719E-01   .2604051E-01   .1745742E-01
   .8683352E-02   .2841879E-02  -.1805432E-03  -.1144278E-02   .4225782E-03
   .4090507E-02   .7839587E-02   .9558461E-02   .9459669E-02   .7488936E-02
   .3628915E-02  -.5080231E-03  -.3178383E-02  -.3874242E-02  -.2559391E-02
   .4418893E-03   .1576967E-02  -.1919351E-02  -.9585564E-02  -.1996316E-01
  -.2977312E-01  -.3548876E-01  -.3706382E-01  -.3574715E-01  -.3192127E-01
  -.2834903E-01  -.2651969E-01  -.2440109E-01  -.1935357E-01  -.1109072E-01
   .9730667E-04   .1414057E-01   .2976440E-01   .4122352E-01   .4451855E-01
   .4071319E-01   .3342308E-01   .2563571E-01   .1925555E-01   .1432916E-01
   .8185592E-02  -.7724097E-03  -.1144620E-01  -.2125513E-01  -.2651050E-01
  -.2597555E-01  -.2164460E-01  -.1559548E-01  -.6241155E-02   .5706314E-02
   .1733083E-01   .2550208E-01   .2981382E-01   .3104944E-01   .3087171E-01
   .3055462E-01   .3014850E-01   .3012981E-01   .3084799E-01   .3373644E-01
   .3825854E-01   .4122773E-01   .3992420E-01   .3420136E-01   .2716654E-01
   .2346158E-01   .2342323E-01   .2340708E-01   .2197015E-01   .1886878E-01
   .1435452E-01   .9744996E-02   .5751909E-02   .2147294E-02  -.6782683E-03
  -.1520497E-02  -.6475463E-03   .2243541E-02   .6914699E-02   .1283062E-01
   .1820471E-01   .1913892E-01   .1435412E-01   .6503827E-02  -.8733183E-03
  -.5074733E-02  -.6018223E-02  -.4552130E-02  -.2905996E-02  -.5493505E-02
  -.1381655E-01  -.2397505E-01  -.3255701E-01  -.3866776E-01  -.4206183E-01
  -.4186202E-01  -.3722443E-01  -.3028548E-01  -.2282621E-01  -.1461309E-01
  -.6511676E-02  -.3389062E-03   .4098013E-02   .8342675E-02   .1379257E-01
   .1981242E-01   .2647270E-01   .3369336E-01   .4005688E-01   .4476808E-01
   .4475840E-01   .3878973E-01   .3128268E-01   .2561812E-01   .2037410E-01
   .1499805E-01   .9166714E-02   .2315716E-02  -.5224822E-02  -.1225933E-01
  -.1624994E-01  -.1711593E-01  -.1558772E-01  -.1186848E-01  -.6179366E-02
   .1382368E-02   .9079716E-02   .1479460E-01   .1740903E-01   .1767467E-01
   .1922583E-01   .2466693E-01   .3203914E-01   .3853596E-01   .4228841E-01
   .4159698E-01   .3670461E-01   .2978751E-01   .2341272E-01   .1912721E-01
   .1736199E-01   .1646086E-01   .1414687E-01   .9930531E-02   .4436744E-02
  -.7688002E-03  -.3557737E-02  -.3638668E-02  -.2936195E-02  -.2128779E-02
  -.4187748E-03   .2668613E-02   .7528172E-02   .1049754E-01   .8206878E-02
   .2045083E-02  -.4041322E-02  -.7556840E-02  -.8371207E-02  -.6787046E-02
  -.3147334E-02   .2553205E-03   .2973876E-02   .5285104E-02   .8008618E-02
   .1241472E-01   .2022080E-01   .3030938E-01   .3867231E-01   .4397983E-01
   .4625355E-01   .4441030E-01   .3974945E-01   .3427025E-01   .2580880E-01
   .1195709E-01  -.5177451E-02  -.2178130E-01  -.3584921E-01  -.4667784E-01
  -.5310857E-01  -.5571009E-01  -.5501519E-01  -.5090797E-01  -.4585398E-01
  -.4156026E-01  -.3643336E-01  -.3092417E-01  -.2715657E-01  -.2464853E-01
  -.2306924E-01  -.2113243E-01  -.1905413E-01  -.1857348E-01  -.1894454E-01
  -.1792320E-01  -.1462887E-01  -.1101910E-01  -.8343930E-02  -.6055424E-02
  -.3338618E-02   .3157974E-03   .5347305E-02   .1070224E-01   .1385642E-01
   .1404287E-01   .1277337E-01   .1154590E-01   .1139906E-01   .1316088E-01
   .1651988E-01   .2001713E-01   .2207749E-01   .2160031E-01   .2017831E-01
   .1837479E-01   .1595385E-01   .1325173E-01   .1055023E-01   .7849668E-02
   .5567121E-02   .4116486E-02   .2885169E-02   .1767786E-02  -.1567203E-03
  -.4479412E-02  -.9453488E-02  -.1299010E-01  -.1448516E-01  -.1362525E-01
  -.1003711E-01  -.4976513E-02   .3320315E-03   .4830244E-02   .7287536E-02
   .5963476E-02   .8613036E-04  -.8183957E-02  -.1681427E-01  -.2475893E-01
  -.3127118E-01  -.3715023E-01  -.4177445E-01  -.4264204E-01  -.3949641E-01
  -.3613657E-01  -.3526052E-01  -.3645286E-01  -.3710509E-01  -.3583091E-01
  -.3184331E-01  -.2501560E-01  -.1742465E-01  -.1068744E-01  -.4578402E-02
  -.6965102E-05   .1988747E-02   .3300073E-02   .5568130E-02   .9797678E-02
   .1413095E-01   .1756738E-01   .1988510E-01   .2056884E-01   .1850018E-01
   .1467207E-01   .1056420E-01   .7416065E-02   .5829949E-02   .6498446E-02
   .9522367E-02   .1308587E-01   .1568503E-01   .1691119E-01   .1678707E-01
   .1370887E-01   .9432239E-02   .5631589E-02   .1418095E-02  -.2929605E-02
  -.7626013E-02  -.1231654E-01  -.1647231E-01  -.2066960E-01  -.2328522E-01
  -.2381429E-01  -.2350979E-01  -.2374861E-01  -.2524136E-01  -.2617875E-01
  -.2293058E-01  -.1675367E-01  -.1063497E-01  -.5768994E-02  -.2546530E-02
  -.9606862E-03  -.1784801E-03  -.1032534E-02  -.2641234E-02  -.4998694E-02
  -.8980928E-02  -.1352217E-01  -.1744757E-01  -.2089555E-01  -.2480725E-01
  -.2852383E-01  -.3033341E-01  -.3046907E-01  -.2949746E-01  -.2807451E-01
  -.2434731E-01  -.1837653E-01  -.1235992E-01  -.7553520E-02  -.4150744E-02
  -.2275645E-02  -.2034626E-02  -.2113053E-02  -.1615485E-02  -.2282091E-03
   .2977196E-02   .7474608E-02   .1135101E-01   .1299114E-01   .1201277E-01
   .8926412E-02   .3673741E-02  -.2803417E-02  -.1017369E-01  -.1651323E-01
  -.2018262E-01  -.2196539E-01  -.2297459E-01  -.2353917E-01  -.2389806E-01
  -.2352906E-01  -.2183154E-01  -.2065000E-01  -.1982285E-01  -.1890451E-01
  -.1790286E-01  -.1614994E-01  -.1467534E-01  -.1318461E-01  -.1232353E-01
  -.1130501E-01  -.9420362E-02  -.7173976E-02  -.5888897E-02  -.4260651E-02
  -.1996767E-02   .1647658E-02   .7347832E-02   .1354171E-01   .1856056E-01
   .2119074E-01   .2105498E-01   .2048574E-01   .2100088E-01   .2192078E-01
   .2261751E-01   .2419939E-01   .2482644E-01   .2296709E-01   .1915019E-01
   .1375250E-01   .8009819E-02   .3043884E-02  -.2125333E-03  -.2171748E-03
   .1800975E-02  -.5562308E-05  -.6493488E-02  -.1478501E-01  -.2315722E-01
  -.3129363E-01  -.3656451E-01  -.3634259E-01  -.2887909E-01  -.1652094E-01
  -.5874155E-02   .2883657E-02   .1041472E-01   .1552563E-01   .1625605E-01
   .1341558E-01   .1065129E-01   .9992227E-02   .1107155E-01   .1315573E-01
   .1420419E-01   .1368246E-01   .1068223E-01   .5789962E-02   .1395017E-02
  -.1798309E-02  -.3202864E-02  -.2107354E-02   .9790860E-03   .5674377E-02
   .1091259E-01   .1453274E-01   .1695250E-01   .1812581E-01   .1792280E-01
   .1686331E-01   .1491865E-01   .1310541E-01   .1151525E-01   .1017206E-01
   .8747236E-02   .6432363E-02   .3135844E-02  -.1333714E-02  -.5852828E-02
  -.9681427E-02  -.1203268E-01  -.1238907E-01  -.1203064E-01  -.1225436E-01
  -.1285286E-01  -.1306503E-01  -.1218809E-01  -.1032947E-01  -.7941575E-02
  -.5149258E-02  -.2532048E-02  -.1370116E-02  -.1980210E-02  -.3757582E-02
  -.5765402E-02  -.6715892E-02  -.5888790E-02  -.2417114E-02   .2986918E-02
   .7642230E-02   .1048281E-01   .1162973E-01   .1078141E-01   .9892992E-02
   .9754753E-02   .1084754E-01   .1270261E-01   .1421276E-01   .1520479E-01
   .1571016E-01   .1559508E-01   .1490393E-01   .1305098E-01   .1011878E-01
   .7155700E-02   .4703039E-02   .3897666E-02   .6064067E-02   .9492205E-02
   .1210468E-01   .1303570E-01   .1247971E-01   .1211755E-01   .1256826E-01
   .1317443E-01   .1378595E-01   .1400735E-01   .1314261E-01   .1264223E-01
   .1299130E-01   .1435710E-01   .1614333E-01   .1620456E-01   .1377690E-01
   .9053364E-02   .3826498E-02  -.1274790E-02  -.5874471E-02  -.8748280E-02
  -.9159170E-02  -.7132465E-02  -.3028004E-02   .5777641E-03   .8758181E-03
  -.3363099E-02  -.1053547E-01  -.1807615E-01  -.2396290E-01  -.2718358E-01
  -.2866044E-01  -.2723176E-01  -.2244284E-01  -.1638052E-01  -.1019170E-01
  -.3097795E-02   .3340953E-02   .6453858E-02   .5708137E-02   .3392963E-02
   .1161563E-02  -.3606221E-03  -.6189388E-04   .3180501E-02   .7474053E-02
   .9790056E-02   .9376238E-02   .7010328E-02   .4112467E-02   .1780662E-02
   .7812248E-03   .1816304E-02   .2600376E-02   .2138862E-02   .2149665E-02
   .3944167E-02   .5691829E-02   .7146759E-02   .8131305E-02   .9583976E-02
   .1066248E-01   .1173149E-01   .1278361E-01   .1265499E-01   .1111202E-01
   .9431456E-02   .9016659E-02   .1026086E-01   .1099412E-01   .1045710E-01
   .9398656E-02   .7325860E-02   .3612023E-02  -.8695281E-03  -.6079563E-02
  -.9487291E-02  -.1058968E-01  -.9554289E-02  -.6157280E-02  -.1131942E-02
   .2869918E-02   .4996494E-02   .6936202E-02   .9159763E-02   .1001052E-01
   .9835407E-02   .1051438E-01   .1275305E-01   .1457549E-01   .1658985E-01
   .1855623E-01   .1811844E-01   .1518388E-01   .1186225E-01   .7591412E-02
   .2786391E-02  -.2534523E-02  -.8207233E-02  -.1347300E-01  -.1694558E-01
  -.1746046E-01  -.1503042E-01  -.1118920E-01  -.8409937E-02  -.7336166E-02
  -.7677127E-02  -.7914112E-02  -.6760133E-02  -.4341157E-02  -.2636969E-02
  -.6465132E-03   .2135062E-02   .4780511E-02   .6643032E-02   .8491621E-02
   .9424486E-02   .7844767E-02   .4613600E-02   .1671926E-02  -.2046906E-03
  -.8482507E-03  -.5689775E-03   .2276346E-03   .1672546E-02   .2048086E-02
   .1449220E-02   .1155462E-02   .1466160E-02   .1854095E-02   .1897391E-02
   .1787600E-02   .2560200E-02   .5282267E-02   .8636169E-02   .1063547E-01
   .1040506E-01   .1003098E-01   .1142221E-01   .1298621E-01   .1242350E-01
   .1105966E-01   .1012828E-01   .9854084E-02   .8962286E-02   .6917574E-02
   .4278734E-02   .2180360E-02   .2731811E-03  -.8529030E-03  -.7792387E-03
  -.5480626E-03  -.1146296E-02  -.2589859E-02  -.4586937E-02  -.7949246E-02
  -.9938548E-02  -.1157068E-01  -.1423317E-01  -.1710093E-01  -.1881107E-01
  -.1982440E-01  -.2072683E-01  -.2101072E-01  -.2016399E-01  -.1761047E-01
  -.1512777E-01  -.1424317E-01  -.1255954E-01  -.9342281E-02  -.5987452E-02
  -.3229023E-02  -.1045174E-02   .4018026E-03   .1271605E-02   .1525745E-02
   .1910950E-02   .2981905E-02   .3490870E-02   .2927652E-02   .1766755E-02
   .1549384E-02   .3191674E-02   .7228989E-02   .1161348E-01   .1518661E-01
   .1760063E-01   .1824622E-01   .1673727E-01   .1370117E-01   .9816888E-02
   .6053896E-02   .3575290E-02   .2682837E-02   .2987398E-02   .4299720E-02
   .6455379E-02   .7782041E-02   .6814854E-02   .2749660E-02  -.2220553E-02
  -.5934354E-02  -.7871316E-02  -.8627173E-02  -.8557141E-02  -.7589309E-02
  -.6524871E-02  -.6511930E-02  -.7483673E-02  -.9746805E-02  -.1216055E-01
  -.1474083E-01  -.1507095E-01  -.1175686E-01  -.7000165E-02  -.3656022E-02
  -.6709362E-03   .2339626E-02   .3971451E-02   .3122835E-02   .2389183E-03
  -.3454558E-02  -.6429523E-02  -.7937189E-02  -.6522733E-02  -.2850413E-02
   .9658789E-03   .3530990E-02   .4498211E-02   .4462022E-02   .4434052E-02
   .4842680E-02   .5282083E-02   .5265163E-02   .4051232E-02   .1492942E-02
  -.6548670E-03  -.1375196E-02  -.5132863E-03   .5503375E-03   .1214179E-02
   .2149717E-02   .3229909E-02   .2852765E-02   .8768563E-03  -.1623580E-02
  -.3359801E-02  -.4114058E-02  -.4154754E-02  -.3405631E-02  -.2685703E-02
  -.2728617E-02  -.1687518E-02   .1317838E-02   .3394060E-02   .3473503E-02
   .2693660E-02   .1196770E-02  -.8518075E-03  -.2823378E-02  -.4033523E-02
  -.5011793E-02  -.5686304E-02  -.5588476E-02  -.4150060E-02  -.1844025E-02
  -.3261970E-03   .5880749E-03   .1853173E-02   .4117984E-02   .6794121E-02
   .9701859E-02   .1311043E-01   .1594549E-01   .1701158E-01   .1654253E-01
   .1619974E-01   .1589805E-01   .1489110E-01   .1407572E-01   .1415347E-01
   .1399974E-01   .1313638E-01   .1319762E-01   .1435598E-01   .1531639E-01
   .1634278E-01   .1716854E-01   .1715476E-01   .1683104E-01   .1628797E-01
   .1507923E-01   .1407904E-01   .1360663E-01   .1254869E-01   .1139531E-01
   .1071773E-01   .9654007E-02   .8579203E-02   .7895104E-02   .6698685E-02
   .4997675E-02   .2790468E-02  -.6400868E-03  -.5550975E-02  -.1032999E-01
  -.1351600E-01  -.1583913E-01  -.1677103E-01  -.1659148E-01  -.1560210E-01
  -.1422467E-01  -.1444906E-01  -.1561146E-01  -.1518700E-01  -.1346713E-01
  -.1137449E-01  -.1059944E-01  -.1049375E-01  -.1081475E-01  -.1159358E-01
  -.1182065E-01  -.1143474E-01  -.1109629E-01  -.1050093E-01  -.8892268E-02
  -.8155988E-02  -.8212094E-02  -.7273327E-02  -.5746734E-02  -.4606030E-02
  -.3149357E-02  -.2262797E-02  -.2050735E-02  -.2849852E-02  -.3638067E-02
  -.3863204E-02  -.2826678E-02  -.9857035E-03   .2316794E-02   .5280439E-02
   .6735789E-02   .7474510E-02   .6328970E-02   .3647818E-02   .5913208E-03
  -.3041828E-02  -.6946947E-02  -.9753361E-02  -.1076993E-01  -.1018194E-01
  -.7865177E-02  -.4941827E-02  -.2855774E-02  -.2850682E-02  -.3860473E-02
  -.5220797E-02  -.7460796E-02  -.1003157E-01  -.1133223E-01  -.1066306E-01
  -.8450399E-02  -.7612967E-02  -.8104627E-02  -.6964061E-02  -.5622602E-02
  -.5579773E-02  -.6009338E-02  -.6041071E-02  -.5739540E-02  -.5134099E-02
  -.3324286E-02  -.2342571E-02  -.3052452E-02  -.4688856E-02  -.5939911E-02
  -.5531708E-02  -.2987229E-02   .4084296E-03   .3010001E-02   .4416163E-02
   .6081572E-02   .8139216E-02   .9505621E-02   .8947583E-02   .6899516E-02
   .4530614E-02   .2883386E-02   .1927466E-02   .7495447E-03  -.8572411E-03
  -.2501091E-02  -.3984675E-02  -.5256022E-02  -.5737869E-02  -.5691039E-02
  -.6536735E-02  -.8408443E-02  -.1017691E-01  -.1141098E-01  -.1255558E-01
  -.1378491E-01  -.1438101E-01  -.1396318E-01  -.1217926E-01  -.1075472E-01
  -.1038754E-01  -.1040673E-01  -.1045003E-01  -.1030606E-01  -.9963215E-02
  -.9111166E-02  -.8478179E-02  -.8631949E-02  -.9107789E-02  -.1006897E-01
  -.1133802E-01  -.1148400E-01  -.9339695E-02  -.6610690E-02  -.4420034E-02
  -.2273343E-02  -.7051766E-03  -.5803535E-03  -.1970399E-02  -.4468108E-02
  -.6972281E-02  -.7743168E-02  -.7573311E-02  -.7223022E-02  -.6104910E-02
  -.4775404E-02  -.4375125E-02  -.5570012E-02  -.8036273E-02  -.1023742E-01
  -.1112201E-01  -.1095760E-01  -.9216410E-02  -.5557401E-02  -.1748026E-02
   .1157787E-02   .2607401E-02   .2157662E-02   .9663226E-03  -.8959919E-03
  -.3413532E-02  -.5355149E-02  -.5536770E-02  -.3625363E-02  -.1156383E-02
  -.4648494E-04  -.2269397E-03  -.7686436E-03  -.1480375E-02  -.3188823E-02
  -.4744743E-02  -.5224058E-02  -.5280419E-02  -.4029925E-02  -.2460810E-02
  -.2541061E-02  -.3404618E-02  -.4336905E-02  -.5542025E-02  -.6843096E-02
  -.8153257E-02  -.9509839E-02  -.1080712E-01  -.1139352E-01  -.1054396E-01
  -.8930247E-02  -.8161813E-02  -.8033782E-02  -.7683664E-02  -.7480633E-02
  -.7448406E-02  -.7318965E-02  -.6463624E-02  -.4716777E-02  -.2188616E-02
   .1980815E-02   .6383660E-02   .8357114E-02   .8728961E-02   .9021528E-02
   .8785782E-02   .8424581E-02   .9744462E-02   .1180629E-01   .1203459E-01
   .1059465E-01   .8276473E-02   .6037572E-02   .4921306E-02   .5116902E-02
   .5717153E-02   .5535506E-02   .5622611E-02   .5748624E-02   .5802772E-02
   .6820608E-02   .8730289E-02   .9716944E-02   .1049213E-01   .1127344E-01
   .1095079E-01   .1034444E-01   .1061200E-01   .1093774E-01   .1170294E-01
   .1305456E-01   .1571410E-01   .1832237E-01   .1949735E-01   .1918906E-01
   .1813806E-01   .1757734E-01   .1734381E-01   .1749276E-01   .1764458E-01
   .1754396E-01   .1731285E-01   .1666595E-01   .1526960E-01   .1424083E-01
   .1439325E-01   .1483255E-01   .1476187E-01   .1395796E-01   .1297337E-01
   .1334922E-01   .1458158E-01   .1437261E-01   .1292555E-01   .1193983E-01
   .1149839E-01   .1165707E-01   .1191806E-01   .1238726E-01   .1359522E-01
   .1458468E-01   .1393140E-01   .1206573E-01   .1094442E-01   .1079800E-01
   .9977364E-02   .8840682E-02   .8606565E-02   .8991195E-02   .1011142E-01
   .1173053E-01   .1195052E-01   .1124691E-01   .1038814E-01   .8625860E-02
   .5759707E-02   .2738790E-02  -.3568113E-03  -.3344044E-02  -.5403946E-02
  -.7263149E-02  -.8380194E-02  -.8364713E-02  -.7622238E-02  -.6360345E-02
  -.5476179E-02  -.4619938E-02  -.2597586E-02  -.6362836E-03   .6714210E-03
   .1801564E-02   .2642420E-02   .2732124E-02   .2538303E-02   .2064454E-02
   .8473280E-03  -.1394239E-03   .5258144E-03   .2392453E-02   .3463393E-02
   .3025077E-02   .2448229E-02   .3020239E-02   .4292801E-02   .4646127E-02
   .4153151E-02   .3251049E-02   .2495497E-02   .1929660E-02   .8098454E-03
   .9150263E-04   .1494161E-02   .3553699E-02   .4357881E-02   .5123931E-02
   .7031620E-02   .8781943E-02   .8772464E-02   .8076189E-02   .7287341E-02
   .6571962E-02   .5103489E-02   .2930695E-02   .1042133E-02   .1770099E-02
   .3908477E-02   .5623680E-02   .6052907E-02   .5273027E-02   .4009676E-02
   .2675551E-02   .1475584E-02   .4568729E-03   .1192950E-03   .7508485E-03
   .3074809E-02   .5765997E-02   .6238849E-02   .5262620E-02   .4908808E-02
   .5455347E-02   .6186934E-02   .7329155E-02   .8611757E-02   .8841231E-02
   .8097537E-02   .6246038E-02   .2344382E-02  -.2471139E-02  -.5940676E-02
  -.8414252E-02  -.9815745E-02  -.9934202E-02  -.8439481E-02  -.7081977E-02
  -.5238013E-02  -.3233937E-02  -.2850620E-02  -.3090109E-02  -.2341411E-02
  -.1936125E-02  -.3185818E-02  -.5205401E-02  -.6832772E-02  -.7947970E-02
  -.9153091E-02  -.1065493E-01  -.1220079E-01  -.1363801E-01  -.1508364E-01
  -.1705561E-01  -.1927184E-01  -.1925269E-01  -.1696664E-01  -.1517439E-01
  -.1417855E-01  -.1338472E-01  -.1136064E-01  -.9330950E-02  -.8842569E-02
  -.1054843E-01  -.1237350E-01  -.1214663E-01  -.1116994E-01  -.1098256E-01
  -.1144344E-01  -.1176752E-01  -.1171175E-01  -.1154912E-01  -.1152616E-01
  -.1180388E-01  -.1323291E-01  -.1489134E-01  -.1494015E-01  -.1456611E-01
  -.1603046E-01  -.1775293E-01  -.1759993E-01  -.1596355E-01  -.1431747E-01
  -.1375319E-01  -.1280589E-01  -.1170604E-01  -.1158565E-01  -.1166453E-01
  -.1073476E-01  -.9746559E-02  -.8936190E-02  -.8722040E-02  -.8978394E-02
  -.9290940E-02  -.1004921E-01  -.1061825E-01  -.1103369E-01  -.1040016E-01
  -.9434286E-02  -.8665561E-02  -.8256265E-02  -.7270412E-02  -.6048597E-02
  -.5810907E-02  -.6554137E-02  -.7980395E-02  -.9546401E-02  -.1088114E-01
  -.1151546E-01  -.1128796E-01  -.1008060E-01  -.7890258E-02  -.6320632E-02
  -.5962689E-02  -.6338715E-02  -.6510859E-02  -.6859107E-02  -.8106346E-02
  -.8846076E-02  -.7139644E-02  -.3651808E-02  -.1200957E-02  -.4189160E-03
   .8057189E-03   .2513729E-02   .3566755E-02   .4088967E-02   .3949828E-02
   .3368485E-02   .4388362E-02   .6331023E-02   .8094104E-02   .8817306E-02
   .8365674E-02   .7832426E-02   .6856999E-02   .4296757E-02   .1220380E-02
  -.2368666E-03   .2118750E-03   .1256712E-02   .2906003E-02   .3848862E-02
   .4968530E-02   .5611895E-02   .5449740E-02   .5297623E-02   .5491517E-02
   .5764446E-02   .6202227E-02   .7393031E-02   .8643624E-02   .8740837E-02
   .7867411E-02   .6446353E-02   .5445214E-02   .5589674E-02   .6070010E-02
   .6162023E-02   .6891472E-02   .8529513E-02   .8959614E-02   .8350382E-02
   .7442956E-02   .5704201E-02   .3445457E-02   .1828610E-02   .6495184E-03
  -.6409319E-03  -.2117171E-02  -.3076947E-02  -.3712766E-02  -.4975607E-02
  -.5991231E-02  -.5947122E-02  -.5583869E-02  -.5297463E-02  -.3926204E-02
  -.2357867E-02  -.9043655E-03  -.5113852E-04  -.7867513E-04   .6300665E-03
   .2457359E-02   .4309245E-02   .5477047E-02   .5647572E-02   .5339523E-02
   .5312521E-02   .5446117E-02   .4864361E-02   .4020757E-02   .3199926E-02
   .2754926E-02   .2887562E-02   .3049606E-02   .2942378E-02   .2610499E-02
   .1721351E-02   .9070570E-03   .2782244E-03  -.7750845E-04   .3191133E-05
   .8099859E-04  -.2184592E-03  -.1043301E-02  -.7050798E-03   .1262252E-03
   .6535161E-03   .2205654E-02   .3598980E-02   .5150657E-02   .6252777E-02
   .7780661E-02   .8649638E-02   .8427744E-02   .8161632E-02   .8334830E-02
   .8600425E-02   .8426078E-02   .7159365E-02   .5626285E-02   .5346878E-02
   .5895391E-02   .6127437E-02   .6084039E-02   .6946392E-02   .8462270E-02
   .9359847E-02   .1075935E-01   .1159738E-01   .1135563E-01   .1105974E-01
   .1120859E-01   .1145019E-01   .1110937E-01   .9681714E-02   .7954965E-02
   .6909287E-02   .6654639E-02   .5767083E-02   .4059411E-02   .2664207E-02
   .2268397E-02   .2183273E-02   .2683539E-02   .2258856E-02   .2301591E-03
  -.4152782E-05   .2773228E-02   .4656151E-02   .3376565E-02   .1892682E-02
   .2091984E-02   .3310080E-02   .4869947E-02   .5863346E-02   .5662949E-02
   .4798820E-02   .3509586E-02   .2133829E-02   .9255621E-03   .5667031E-04
  -.4014382E-04   .1942519E-03   .6282532E-03   .1868320E-02   .2953198E-02
   .3426656E-02   .4389917E-02   .4964868E-02   .4178061E-02   .3098748E-02
   .1884077E-02   .6265463E-03  -.1562257E-03  -.6482034E-04   .1785312E-03
   .1146728E-03   .4396237E-03   .1782009E-02   .2913878E-02   .2781373E-02
   .1810187E-02   .8725533E-03   .4346620E-03  -.7588495E-04  -.7426434E-03
  -.2110185E-02  -.3766138E-02  -.4699968E-02  -.4989583E-02  -.5523255E-02
  -.5735912E-02  -.4621312E-02  -.2170486E-02   .1632441E-03   .2533406E-02
   .4696866E-02   .6023600E-02   .6605889E-02   .6602888E-02   .6120435E-02
   .5410307E-02   .4824699E-02   .3756359E-02   .2697473E-02   .2037387E-02
   .8670450E-03  -.7917997E-03  -.2362957E-02  -.3761583E-02  -.5591233E-02
  -.7888424E-02  -.9035398E-02  -.8710935E-02  -.8317788E-02  -.8504756E-02
  -.8412817E-02  -.8085847E-02  -.8218218E-02  -.8252950E-02  -.8779524E-02
  -.8993627E-02  -.8797547E-02  -.8650584E-02  -.8717922E-02  -.8827349E-02
  -.8836805E-02  -.8615808E-02  -.7202927E-02  -.4829224E-02  -.3255759E-02
  -.2862229E-02  -.2058998E-02  -.1155533E-02  -.1633771E-02  -.2637618E-02
  -.2542950E-02  -.7588973E-03   .6425766E-03   .1605458E-02   .2603941E-02
   .2662237E-02   .2263811E-02   .1557981E-02   .2491972E-03  -.1232374E-02
  -.2569721E-02  -.3815370E-02  -.4547539E-02  -.5160595E-02  -.6558049E-02
  -.8247122E-02  -.8975931E-02  -.7859853E-02  -.5914676E-02  -.4498988E-02
  -.3420310E-02  -.1671219E-02  -.1069317E-03  -.7910019E-04  -.5506688E-03
  -.4994388E-03  -.1121901E-03   .8400177E-04   .9659336E-05  -.1071264E-03
  -.1306499E-03  -.1796360E-03  -.8896277E-03  -.2429584E-02  -.3928745E-02
  -.4539805E-02  -.4944646E-02  -.6224792E-02  -.7374977E-02  -.7994808E-02
  -.8535741E-02  -.9264504E-02  -.9992496E-02  -.9979889E-02  -.9114397E-02
  -.8119223E-02  -.7427943E-02  -.6348084E-02  -.5359086E-02  -.4086756E-02
  -.2512501E-02  -.1044380E-02   .1725381E-03   .1978253E-03  -.1278197E-03
  -.5567508E-04   .4262043E-03   .1557283E-02   .3164967E-02   .4623341E-02
   .5871076E-02   .7181309E-02   .8463726E-02   .8993763E-02   .8949373E-02
   .9498925E-02   .9569327E-02   .8810499E-02   .7837143E-02   .7255764E-02
   .6693900E-02   .6253156E-02   .6291967E-02   .6403142E-02   .6330373E-02
   .6207793E-02   .6223004E-02   .6312865E-02   .6335505E-02   .6293453E-02
   .6124763E-02   .5341807E-02   .4482440E-02   .3655102E-02   .2511211E-02
   .1909860E-02   .2097586E-02   .2162425E-02   .1244230E-02   .1828901E-03
  -.7563151E-03  -.1872578E-02  -.2359502E-02  -.1921834E-02  -.5893428E-03
   .7928157E-03   .1140294E-02   .1741604E-02   .3071348E-02   .3905114E-02
   .4611347E-02   .4940955E-02   .4614021E-02   .3586652E-02   .3355985E-02
   .4686559E-02   .5562420E-02   .5046130E-02   .3597925E-02   .3003615E-02
   .3280774E-02   .2786856E-02   .1912502E-02   .8943014E-03   .5174486E-03
   .7823573E-03   .9740273E-03   .1066320E-02   .2012076E-02   .3513498E-02
   .4364393E-02   .5753757E-02   .6608210E-02   .6384593E-02   .6090725E-02
   .6221611E-02   .6269683E-02   .5238139E-02   .3746989E-02   .3604703E-02
   .5231831E-02   .6966307E-02   .7089719E-02   .6565891E-02   .7258896E-02
   .8120970E-02   .7860323E-02   .6721674E-02   .6354445E-02   .6784303E-02
   .7041435E-02   .6514094E-02   .4995530E-02   .3286887E-02   .2330174E-02
   .2120992E-02   .1186905E-02  -.6146011E-03  -.2302245E-02  -.3223233E-02
  -.3448576E-02  -.3669545E-02  -.3208069E-02  -.2856129E-02  -.2662915E-02
  -.1966156E-02  -.1552946E-02  -.1715902E-02  -.1845515E-02  -.1728348E-02
  -.1587266E-02  -.1566365E-02  -.1615411E-02  -.1661759E-02  -.1898525E-02
  -.3077932E-02  -.4786502E-02  -.6388173E-02  -.8471165E-02  -.1033673E-01
  -.1157834E-01  -.1258818E-01  -.1293872E-01  -.1261640E-01  -.1169134E-01
  -.1107984E-01  -.1049375E-01  -.1002759E-01  -.9229299E-02  -.8531574E-02
  -.7668230E-02  -.7233784E-02  -.7205824E-02  -.6673822E-02  -.6967511E-02
  -.7839568E-02  -.8804503E-02  -.9252377E-02  -.9820373E-02  -.1021175E-01
  -.1022706E-01  -.1016323E-01  -.1001174E-01  -.9206835E-02  -.8723997E-02
  -.9141235E-02  -.1030717E-01  -.1100641E-01  -.1171676E-01  -.1280986E-01
  -.1322882E-01  -.1299245E-01  -.1309471E-01  -.1444859E-01  -.1612602E-01
  -.1666806E-01  -.1704393E-01  -.1736594E-01  -.1740514E-01  -.1738206E-01
  -.1724992E-01  -.1645402E-01  -.1614017E-01  -.1702074E-01  -.1690017E-01
  -.1605701E-01  -.1538822E-01  -.1377759E-01  -.1261367E-01  -.1182788E-01
  -.1080504E-01  -.1036826E-01  -.1053789E-01  -.1063404E-01  -.1046921E-01
  -.1026585E-01  -.9803203E-02  -.7959675E-02  -.6410077E-02  -.5025355E-02
  -.4526062E-02  -.4864272E-02  -.5042368E-02  -.5040329E-02  -.6190426E-02
  -.8805788E-02  -.1066453E-01  -.1049771E-01  -.9756258E-02  -.9760001E-02
  -.9967799E-02  -.8630614E-02  -.6854795E-02  -.5287358E-02  -.4352690E-02
  -.3850091E-02  -.3468671E-02  -.3375929E-02  -.3503573E-02  -.4192726E-02
  -.4763911E-02  -.4492878E-02  -.3289557E-02  -.1801253E-02  -.1197066E-02
  -.7526989E-03   .4480454E-03   .1290846E-02   .1197956E-02   .1095394E-02
   .2151727E-02   .4018439E-02   .5589667E-02   .6564048E-02   .6927289E-02
   .7543045E-02   .8248044E-02   .8230545E-02   .7259274E-02   .6528657E-02
   .6745444E-02   .7138774E-02   .7129879E-02   .6901617E-02   .6783599E-02
   .6828317E-02   .6914690E-02   .6994989E-02   .7174447E-02   .8068773E-02
   .9500448E-02   .1025147E-01   .1084759E-01   .1202807E-01   .1275995E-01
   .1261724E-01   .1237585E-01   .1247618E-01   .1270911E-01   .1283961E-01
   .1282238E-01   .1275008E-01   .1273316E-01   .1276415E-01   .1277553E-01
   .1271580E-01   .1265517E-01   .1265864E-01   .1268326E-01   .1268720E-01
   .1269840E-01   .1299926E-01   .1459785E-01   .1600335E-01   .1611830E-01
   .1710764E-01   .1863496E-01   .1974682E-01   .2097923E-01   .2244794E-01
   .2380685E-01   .2444037E-01   .2511741E-01   .2648149E-01   .2731739E-01
   .2713209E-01   .2664350E-01   .2557316E-01   .2319690E-01   .2040336E-01
   .1925695E-01   .1852262E-01   .1682062E-01   .1562268E-01   .1569511E-01
   .1604800E-01   .1613513E-01   .1716133E-01   .1861658E-01   .1806508E-01
   .1651745E-01   .1564345E-01   .1546017E-01   .1584565E-01   .1667701E-01
   .1736480E-01   .1719046E-01   .1671022E-01   .1600731E-01   .1528923E-01
   .1464660E-01   .1346325E-01   .1257773E-01   .1267407E-01   .1297840E-01
   .1291565E-01   .1266765E-01   .1255411E-01   .1252703E-01   .1195487E-01
   .1115207E-01   .1100561E-01   .1067620E-01   .9946561E-02   .9661967E-02
   .9173267E-02   .8400363E-02   .8255804E-02   .8497965E-02   .8572966E-02
   .8350052E-02   .7537629E-02   .6591001E-02   .5875259E-02   .4707955E-02
   .3155002E-02   .1674570E-02   .1145090E-02   .1453016E-02   .1627030E-02
   .1393763E-02   .1133616E-02   .1100660E-02   .1196901E-02   .1252750E-02
   .1235445E-02   .1205114E-02   .1202537E-02   .1204334E-02   .1159081E-02
   .1121069E-02   .1167050E-02   .1075959E-02   .2354911E-03  -.6595150E-03
  -.1346677E-02  -.1836007E-02  -.2548249E-02  -.3154139E-02  -.3142669E-02
  -.2805335E-02  -.2007545E-02  -.1441611E-02  -.1612078E-02  -.1898472E-02
  -.1860316E-02  -.1674346E-02  -.1747792E-02  -.2634729E-02  -.3556275E-02
  -.4226230E-02  -.4544656E-02  -.4431791E-02  -.4337008E-02  -.4448417E-02
  -.4600995E-02  -.4684891E-02  -.4684941E-02  -.4645958E-02  -.4629481E-02
  -.4643287E-02  -.4647128E-02  -.4579273E-02  -.4374928E-02  -.3619621E-02
  -.3125529E-02  -.3991225E-02  -.4939747E-02  -.4840833E-02  -.4364044E-02
  -.4265226E-02  -.4478128E-02  -.4627936E-02  -.4600035E-02  -.4521244E-02
  -.4499955E-02  -.4525037E-02  -.4555271E-02  -.4699052E-02  -.5366138E-02
  -.5422232E-02  -.5585505E-02  -.6866793E-02  -.7914231E-02  -.8684900E-02
  -.9946601E-02  -.1153076E-01  -.1285886E-01  -.1324227E-01  -.1312464E-01
  -.1400346E-01  -.1572819E-01  -.1651315E-01  -.1609989E-01  -.1555009E-01
  -.1487190E-01  -.1446615E-01  -.1466769E-01  -.1506906E-01  -.1597539E-01
  -.1728757E-01  -.1795459E-01  -.1856468E-01  -.1980236E-01  -.2070821E-01
  -.2138451E-01  -.2184970E-01  -.2184370E-01  -.2173262E-01  -.2164282E-01
  -.2095981E-01  -.2035935E-01  -.2062458E-01  -.2167374E-01  -.2233695E-01
  -.2222465E-01  -.2266645E-01  -.2341130E-01  -.2352050E-01  -.2309912E-01
  -.2221941E-01  -.2168761E-01  -.2190390E-01  -.2219441E-01  -.2213929E-01
  -.2193884E-01  -.2185760E-01  -.2189699E-01  -.2178887E-01  -.2095943E-01
  -.2022228E-01  -.2031774E-01  -.2065865E-01  -.2083130E-01  -.2146274E-01
  -.2205672E-01  -.2181638E-01  -.2057257E-01  -.1892502E-01  -.1755139E-01
  -.1640295E-01  -.1513454E-01  -.1382730E-01  -.1327872E-01  -.1346809E-01
  -.1359564E-01  -.1340762E-01  -.1319618E-01  -.1316886E-01  -.1324377E-01
  -.1328635E-01  -.1327439E-01  -.1324722E-01  -.1322769E-01  -.1306753E-01
  -.1209767E-01  -.1059867E-01  -.9871650E-02  -.9356220E-02  -.8160190E-02
  -.7194947E-02  -.6382429E-02  -.5156166E-02  -.4452432E-02  -.4484658E-02
  -.3945167E-02  -.3069897E-02  -.2251837E-02  -.1617222E-02  -.1562200E-02
  -.1055616E-02   .4562636E-03   .1521734E-02   .1320402E-02   .8720480E-03
   .1005377E-02   .2047758E-02   .3769523E-02   .5326706E-02   .6489293E-02
   .7668164E-02   .9012349E-02   .9872648E-02   .1050259E-01   .1180337E-01
   .1283234E-01   .1277275E-01   .1241835E-01   .1244508E-01   .1270460E-01
   .1292148E-01   .1356514E-01   .1443089E-01   .1501524E-01   .1485314E-01
   .1402048E-01   .1383869E-01   .1421720E-01   .1443394E-01   .1423334E-01
   .1338305E-01   .1248877E-01   .1242660E-01   .1215922E-01   .1133080E-01
   .1040595E-01   .9737793E-02   .9890419E-02   .1082616E-01   .1165094E-01
   .1149516E-01   .1104547E-01   .1091484E-01   .1046546E-01   .9754970E-02
   .9725928E-02   .1005876E-01   .1020913E-01   .1067834E-01   .1144152E-01
   .1214239E-01   .1268978E-01   .1266358E-01   .1239850E-01   .1178545E-01
   .1104988E-01   .1040382E-01   .9836914E-02   .9827752E-02   .9999055E-02
   .9966122E-02   .9807833E-02   .9727132E-02   .9747584E-02   .9748505E-02
   .9248654E-02   .8351166E-02   .8160321E-02   .8525848E-02   .9176224E-02
   .9906134E-02   .9934005E-02   .9608699E-02   .9529579E-02   .9658451E-02
   .9285861E-02   .8348768E-02   .7560910E-02   .6915635E-02   .6876962E-02
   .7086399E-02   .7076782E-02   .6855662E-02   .6199628E-02   .4838549E-02
   .3783716E-02   .3382783E-02   .2833256E-02   .2115068E-02   .1322666E-02
   .1636125E-02   .2728168E-02   .2979439E-02   .2527761E-02   .2266837E-02
   .2411728E-02   .2619979E-02   .2707065E-02   .3176507E-02   .4063965E-02
   .4222036E-02   .3368661E-02   .2336607E-02   .2798382E-02   .4176755E-02
   .4599473E-02   .4672967E-02   .5732003E-02   .6927710E-02   .7075888E-02
   .7214613E-02   .8081499E-02   .8513422E-02   .8315116E-02   .7758829E-02
   .6848451E-02   .6239329E-02   .5670854E-02   .5491674E-02   .5618734E-02
   .5647326E-02   .5522817E-02   .5391882E-02   .5030364E-02   .4151082E-02
   .3424331E-02   .2727302E-02   .2541038E-02   .2727374E-02   .2782469E-02
   .2636233E-02   .2509563E-02   .2507156E-02   .2530924E-02   .2226423E-02
   .1688608E-02   .2229605E-02   .2918418E-02   .2884271E-02   .2534760E-02
   .2389253E-02   .2497501E-02   .2618338E-02   .2623854E-02   .2600085E-02
   .2958587E-02   .3922856E-02   .4322481E-02   .4064862E-02   .4200693E-02
   .5234011E-02   .6132272E-02   .6758891E-02   .6483191E-02   .5321914E-02
   .4194273E-02   .2756301E-02   .1944753E-02   .1107905E-02  -.3059853E-04
  -.7636694E-03  -.1435471E-02  -.1734260E-02  -.2023425E-02  -.2939576E-02
  -.3462833E-02  -.3633932E-02  -.4303303E-02  -.4697435E-02  -.4232143E-02
  -.3189178E-02  -.2888008E-02  -.3282699E-02  -.3530865E-02  -.3423370E-02
  -.3612842E-02  -.4851720E-02  -.6261258E-02  -.6779922E-02  -.7194081E-02
  -.7793263E-02  -.8749612E-02  -.9153978E-02  -.8956147E-02  -.8804432E-02
  -.8912571E-02  -.9034648E-02  -.8677994E-02  -.7675810E-02  -.7256973E-02
  -.7521604E-02  -.7364154E-02  -.6009421E-02  -.4866520E-02  -.5308665E-02
  -.5682394E-02  -.6151297E-02  -.6642474E-02  -.7265109E-02  -.7458032E-02
  -.7288606E-02  -.7252406E-02  -.7759338E-02  -.8825023E-02  -.9211044E-02
  -.8877061E-02  -.8659192E-02  -.8840733E-02  -.9061917E-02  -.9056010E-02
  -.8593765E-02  -.7607122E-02  -.7249570E-02  -.7564146E-02  -.7782262E-02
  -.7654401E-02  -.7456530E-02  -.7381791E-02  -.7079971E-02  -.6199670E-02
  -.5445549E-02  -.4742243E-02  -.4562240E-02  -.4728423E-02  -.4431104E-02
  -.3430300E-02  -.3308121E-02  -.4463017E-02  -.5077408E-02  -.4728049E-02
  -.4340808E-02  -.4399162E-02  -.4666004E-02  -.5139476E-02  -.6050158E-02
  -.6709576E-02  -.7298320E-02  -.7453099E-02  -.7301724E-02  -.7282975E-02
  -.7440147E-02  -.7567607E-02  -.7574523E-02  -.7529622E-02  -.7503533E-02
  -.7493472E-02  -.7458523E-02  -.7053942E-02  -.5757661E-02  -.4408542E-02
  -.3904534E-02  -.3100207E-02  -.1525016E-02   .1313722E-03   .1465810E-02
   .2353938E-02   .2436156E-02   .2209549E-02   .1931879E-02   .1279471E-02
   .6746510E-03  -.4060533E-04  -.2867288E-03  -.1337137E-03  -.6824045E-04
   .9318361E-04   .8540567E-03   .1266367E-02   .1053370E-02   .8568497E-03
   .9808462E-03   .1217976E-02   .1334827E-02   .1337086E-02   .1511003E-02
   .2390769E-02   .2904013E-02   .2651351E-02   .2343521E-02   .2380001E-02
   .2549031E-02   .2399879E-02   .1238020E-02  -.3101708E-03  -.8597007E-03
  -.1221606E-02  -.1516653E-02  -.1557289E-02  -.1543437E-02  -.1588351E-02
  -.1629181E-02  -.1627116E-02  -.1617662E-02  -.1633655E-02  -.1650012E-02
  -.1450018E-02  -.4901716E-03   .2777738E-03   .9435469E-03   .1377511E-02
   .2092986E-02   .2521433E-02   .2397022E-02   .2210686E-02   .2061728E-02
   .1324428E-02   .8746411E-03   .1107226E-02   .1397727E-02   .1367492E-02
   .9951360E-03  -.2945695E-04  -.7535598E-03  -.1354783E-02  -.1564427E-02
  -.1193482E-02  -.1759985E-04   .1326852E-02   .1693787E-02   .2105150E-02
   .3340417E-02   .4191616E-02   .4069829E-02   .3928490E-02   .4953289E-02
   .6671737E-02   .7358958E-02   .7057714E-02   .7474787E-02   .8338236E-02
   .8569628E-02   .8362952E-02   .8270730E-02   .8388481E-02   .8508442E-02
   .8494059E-02   .8380610E-02   .8145376E-02   .7317282E-02   .6520414E-02
   .5915143E-02   .5604093E-02   .5728992E-02   .5982493E-02   .6651851E-02
   .7191318E-02   .7227602E-02   .7808684E-02   .8565012E-02   .8648621E-02
   .8406935E-02   .8321878E-02   .8377234E-02   .8356035E-02   .8354744E-02
   .9030654E-02   .9707477E-02   .9671570E-02   .9443766E-02   .9378467E-02
   .8821544E-02   .8149686E-02   .7503239E-02   .6972240E-02   .6251965E-02
   .5799261E-02   .6560376E-02   .7381268E-02   .7241704E-02   .6798770E-02
   .6747877E-02   .6991084E-02   .7176969E-02   .7216412E-02   .7231833E-02
   .7289299E-02   .7346436E-02   .7344175E-02   .7272356E-02   .7087989E-02
   .6342961E-02   .5456437E-02   .5366683E-02   .5562910E-02   .4903115E-02
   .3894950E-02   .3881778E-02   .4497752E-02   .4937284E-02   .5100360E-02
   .5283948E-02   .5572092E-02   .5799767E-02   .5783995E-02   .5414579E-02
   .4584001E-02   .3429579E-02   .1702052E-02   .8477626E-05  -.8840250E-03
  -.1799494E-02  -.2341733E-02  -.1636881E-02  -.5213443E-03  -.6664835E-04
   .1992813E-03  -.6438926E-04  -.1119677E-02  -.1056999E-02  -.1049537E-03
  -.2432177E-03  -.6814125E-03   .4143526E-05   .6292321E-03   .4789137E-03
  -.8578160E-04  -.7835393E-03  -.1115892E-02  -.1665252E-02  -.3150082E-02
  -.4803726E-02  -.5073788E-02  -.4463063E-02  -.4146242E-02  -.4377709E-02
  -.4837730E-02  -.5294176E-02  -.5434944E-02  -.5462236E-02  -.5662184E-02
  -.5636253E-02  -.4713809E-02  -.3749952E-02  -.3205915E-02  -.2348047E-02
  -.1810184E-02  -.1646840E-02  -.1521190E-02  -.9106354E-03   .3239337E-04
   .2494485E-03  -.2141598E-04  -.5098708E-03  -.1097047E-02  -.1094033E-02
  -.1266055E-02  -.1925048E-02  -.1649373E-02  -.6694517E-03  -.5962011E-03
  -.1280932E-02  -.2265472E-02  -.3231178E-02  -.3370219E-02  -.3113549E-02
  -.3585671E-02  -.4712376E-02  -.4616427E-02  -.3411769E-02  -.2957973E-02
  -.3272620E-02  -.3517261E-02  -.3507770E-02  -.3498256E-02  -.3602470E-02
  -.3703210E-02  -.3715849E-02  -.3729313E-02  -.3859326E-02  -.4078752E-02
  -.4234806E-02  -.4157302E-02  -.3822338E-02  -.3787134E-02  -.4173550E-02
  -.3569606E-02  -.2195139E-02  -.1798200E-02  -.2236772E-02  -.2500395E-02
  -.2359215E-02  -.2616251E-02  -.3095920E-02  -.3102349E-02  -.3657492E-02
  -.4168732E-02  -.3914875E-02  -.3272246E-02  -.3424799E-02  -.3579621E-02
  -.2936036E-02  -.2499787E-02  -.2395751E-02  -.1743131E-02  -.5119285E-03
   .1758470E-05  -.1798449E-03  -.3364336E-03  -.2972871E-03  -.7406708E-03
  -.1734969E-02  -.2129545E-02  -.2351796E-02  -.2548498E-02  -.2298105E-02
  -.2641162E-02  -.2916475E-02  -.3250236E-02  -.3976284E-02  -.4299903E-02
  -.4708210E-02  -.5605282E-02  -.5967270E-02  -.5709312E-02  -.5492051E-02
  -.5590607E-02  -.5807397E-02  -.5926251E-02  -.5946400E-02  -.5935700E-02
  -.5469614E-02  -.4569576E-02  -.4258259E-02  -.3945129E-02  -.3087703E-02
  -.2307737E-02  -.1751299E-02  -.1429712E-02  -.4460227E-03   .6356401E-03
   .7851615E-03   .5458158E-03   .6304800E-03   .5707230E-03   .5660356E-04
  -.4036985E-03  -.9839329E-03  -.1608081E-02  -.2458849E-02  -.3187155E-02
  -.3841389E-02  -.3898606E-02  -.3664204E-02  -.3660938E-02  -.3922835E-02
  -.4187380E-02  -.4033435E-02  -.3285443E-02  -.3043969E-02  -.3356933E-02
  -.3168308E-02  -.2023133E-02  -.1336551E-02  -.1176037E-02  -.5619581E-03
   .1172062E-03   .4424672E-03  -.4345965E-03  -.1134645E-02  -.9384300E-03
  -.4727668E-03  -.2430798E-03  -.1395348E-03   .3704095E-03   .1475895E-02
   .1947677E-02   .1644294E-02   .1322131E-02   .1299783E-02   .1357164E-02
   .1291665E-02   .1143516E-02   .7449240E-03   .1988879E-03   .5203514E-03
   .4307070E-03   .1812966E-03   .3170319E-03   .5545932E-03   .5435285E-03
   .1407137E-03  -.1004911E-02  -.1761914E-02  -.1765063E-02  -.1703423E-02
  -.1908644E-02  -.2372296E-02  -.3379743E-02  -.3819383E-02  -.3447484E-02
  -.3110065E-02  -.3196453E-02  -.3438949E-02  -.3737824E-02  -.4594551E-02
  -.4973239E-02  -.4430806E-02  -.3234424E-02  -.2768706E-02  -.3187726E-02
  -.3533688E-02  -.3244209E-02  -.2096081E-02  -.1446093E-02  -.1626633E-02
  -.1754203E-02  -.1442048E-02  -.1046397E-02  -.9056803E-03  -.9882523E-03
  -.1129311E-02  -.1432280E-02  -.2280879E-02  -.2215526E-02  -.2431076E-02
  -.2958343E-02  -.3088551E-02  -.3010621E-02  -.3097192E-02  -.3339414E-02
  -.3382103E-02  -.2611935E-02  -.1890068E-02  -.1986834E-02  -.2174531E-02
  -.1404216E-02  -.5059668E-03  -.4000035E-03  -.6242293E-03  -.5831322E-03
  -.1280959E-03   .9467803E-03   .1755143E-02   .1573473E-02   .5385507E-03
  -.8973493E-04   .1005863E-03  -.2816373E-03  -.1101399E-02  -.1435623E-02
  -.1425744E-02  -.1522084E-02  -.1789522E-02  -.2030918E-02  -.2131340E-02
  -.2105798E-02  -.1882885E-02  -.1028723E-02  -.2773404E-03  -.2762230E-03
  -.4759749E-03  -.3804135E-03  -.1253960E-03  -.1209295E-04  -.8066610E-04
  -.2007751E-03  -.2865308E-03  -.3137028E-03  -.3178834E-03  -.3221855E-03
  -.1837526E-03   .6372963E-03   .1374887E-02   .1337021E-02   .1236355E-02
   .2074659E-02   .2980395E-02   .2994381E-02   .2620396E-02   .2527410E-02
   .2736056E-02   .3089808E-02   .3997194E-02   .4812217E-02   .5364042E-02
   .5918652E-02   .6542718E-02   .7150868E-02   .7167382E-02   .7022094E-02
   .7673552E-02   .8659733E-02   .8762889E-02   .8445405E-02   .8935773E-02
   .9878607E-02   .1001679E-01   .9629597E-02   .9439287E-02   .9590043E-02
   .9824550E-02   .9960806E-02   .9996985E-02   .1000496E-01   .1002145E-01
   .1012919E-01   .1084354E-01   .1173182E-01   .1178633E-01   .1143969E-01
   .1141809E-01   .1223775E-01   .1317338E-01   .1309325E-01   .1256060E-01
   .1232196E-01   .1187909E-01   .1129994E-01   .1186774E-01   .1290796E-01
   .1300701E-01   .1258177E-01   .1246481E-01   .1272012E-01   .1296080E-01
   .1299735E-01   .1293872E-01   .1292086E-01   .1288807E-01   .1229059E-01
   .1147817E-01   .1138489E-01   .1162686E-01   .1146512E-01   .9908935E-02
   .8072308E-02   .7991158E-02   .8723742E-02   .8922182E-02   .8589002E-02
   .8347958E-02   .8412656E-02   .8572522E-02   .8648205E-02   .8565036E-02
   .7886040E-02   .7054127E-02   .7028997E-02   .7281170E-02   .6680530E-02
   .5631536E-02   .5374696E-02   .5363759E-02   .3906514E-02   .2416846E-02
   .2508276E-02   .3012187E-02   .2286577E-02   .1213281E-02   .1063958E-02
   .1248423E-02   .5126544E-03  -.3729215E-03  -.5173340E-03  -.1060034E-02
  -.2444855E-02  -.3209836E-02  -.2928742E-02  -.2612114E-02  -.2776747E-02
  -.3119380E-02  -.3264376E-02  -.3315706E-02  -.3943566E-02  -.4551934E-02
  -.4628540E-02  -.5257226E-02  -.5855630E-02  -.5797205E-02  -.5545614E-02
  -.5514410E-02  -.5629560E-02  -.5691048E-02  -.5897532E-02  -.7061726E-02
  -.8601215E-02  -.9014525E-02  -.8617063E-02  -.8498023E-02  -.8816183E-02
  -.9084397E-02  -.9054966E-02  -.8898572E-02  -.8838349E-02  -.8884236E-02
  -.8968885E-02  -.9226575E-02  -.1017855E-01  -.1107586E-01  -.1171937E-01
  -.1170024E-01  -.1103501E-01  -.1009222E-01  -.1025577E-01  -.1159526E-01
  -.1228364E-01  -.1225569E-01  -.1269667E-01  -.1276401E-01  -.1189534E-01
  -.1145673E-01  -.1145852E-01  -.1090547E-01  -.1048626E-01  -.1057551E-01
  -.1106577E-01  -.1192161E-01  -.1219245E-01  -.1190487E-01  -.1171318E-01
  -.1173687E-01  -.1134907E-01  -.1036105E-01  -.9963078E-02  -.1012925E-01
  -.1018928E-01  -.9994627E-02  -.9811280E-02  -.9818702E-02  -.9888353E-02
  -.9451045E-02  -.8574430E-02  -.8365847E-02  -.8658400E-02  -.8822911E-02
  -.9175734E-02  -.9912779E-02  -.1010083E-01  -.9807386E-02  -.9192749E-02
  -.8417269E-02  -.7875297E-02  -.7324529E-02  -.7264025E-02  -.7453119E-02
  -.7470801E-02  -.7387014E-02  -.7443994E-02  -.7595748E-02  -.7701772E-02
  -.7766456E-02  -.8367389E-02  -.9191793E-02  -.9235516E-02  -.8806775E-02
  -.8033579E-02  -.7338714E-02  -.7424483E-02  -.7826051E-02  -.8500114E-02
  -.9121096E-02  -.9000842E-02  -.8649121E-02  -.8520191E-02  -.7924702E-02
  -.6507169E-02  -.5588127E-02  -.5774197E-02  -.6085040E-02  -.5932146E-02
  -.5581178E-02  -.5338118E-02  -.4689356E-02  -.3787912E-02  -.2980546E-02
  -.1690217E-02  -.1765639E-03   .6467940E-03   .1104772E-02   .1711535E-02
   .1876362E-02   .1718170E-02   .1496836E-02   .7643245E-03   .7147646E-04
   .6452532E-04   .2755777E-03   .2250015E-03  -.1327151E-04  -.3166783E-03
  -.1262017E-02  -.2753798E-02  -.3399327E-02  -.2989034E-02  -.2451875E-02
  -.1593593E-02  -.3439977E-03   .3175953E-03   .7886722E-03   .1196316E-02
   .1163871E-02   .8413130E-03  -.6251989E-05  -.4869537E-03   .4973428E-03
   .1560214E-02   .1633221E-02   .1927878E-02   .2521883E-02   .2686320E-02
   .2590296E-02   .2766668E-02   .3669498E-02   .4398947E-02   .4486853E-02
   .5107568E-02   .5664630E-02   .5597383E-02   .5323116E-02   .5281750E-02
   .5427717E-02   .5704901E-02   .6586077E-02   .7323909E-02   .8107629E-02
   .8438863E-02   .8040307E-02   .6963389E-02   .6740475E-02   .8113339E-02
   .9052286E-02   .8780472E-02   .8373413E-02   .8687122E-02   .9927799E-02
   .1060127E-01   .1027464E-01   .9866794E-02   .9912194E-02   .1036248E-01
   .1140884E-01   .1188601E-01   .1162170E-01   .1122321E-01   .1049387E-01
   .1022003E-01   .1039735E-01   .9806908E-02   .8957349E-02   .8673497E-02
   .7946282E-02   .6512001E-02   .5922543E-02   .6975457E-02   .7951672E-02
   .7729907E-02   .7158128E-02   .6911441E-02   .6368417E-02   .5834024E-02
   .5855883E-02   .6020786E-02   .5925597E-02   .5820762E-02   .6457778E-02
   .7202138E-02   .7046455E-02   .5972616E-02   .4998351E-02   .5056375E-02
   .5267781E-02   .3962596E-02   .2075273E-02   .1849960E-02   .2546588E-02
   .2799873E-02   .2542230E-02   .2375574E-02   .2538548E-02   .2810407E-02
   .2952341E-02   .2960276E-02   .2940967E-02   .2947139E-02   .2975744E-02
   .3006756E-02   .3027669E-02   .3064003E-02   .3084283E-02   .2530950E-02
   .1062865E-02  -.2096737E-04   .1819069E-03   .6039634E-03  -.1144106E-04
  -.1360766E-02  -.2256027E-02  -.2765991E-02  -.2756415E-02  -.2658471E-02
  -.3253741E-02  -.4352606E-02  -.4605314E-02  -.4174654E-02  -.3904884E-02
  -.4022964E-02  -.4189250E-02  -.4153468E-02  -.3712837E-02  -.2826971E-02
  -.2869229E-02  -.4075534E-02  -.4681253E-02  -.4686771E-02  -.5272817E-02
  -.5747576E-02  -.5709617E-02  -.5571827E-02  -.5598644E-02  -.5681280E-02
  -.5693506E-02  -.5657693E-02  -.5642321E-02  -.5668063E-02  -.5698146E-02
  -.5709098E-02  -.5720788E-02  -.5760544E-02  -.5789776E-02  -.5586696E-02
  -.4623764E-02  -.4037566E-02  -.4227995E-02  -.4259788E-02  -.3246733E-02
  -.2467960E-02  -.2576825E-02  -.2833387E-02  -.2826230E-02  -.2651044E-02
  -.2511036E-02  -.2442854E-02  -.2474491E-02  -.2791240E-02  -.3752132E-02
  -.4437963E-02  -.5142793E-02  -.5498726E-02  -.5375324E-02  -.5227370E-02
  -.5303349E-02  -.5306630E-02  -.4550448E-02  -.3817171E-02  -.3756400E-02
  -.3281300E-02  -.2610715E-02  -.2529602E-02  -.2737921E-02  -.2728199E-02
  -.2537367E-02  -.2385227E-02  -.2353511E-02  -.2389541E-02  -.2398995E-02
  -.2310919E-02  -.2026931E-02  -.1164749E-02  -.4111541E-03  -.3519264E-03
  -.5058656E-03  -.3994403E-03   .7037290E-04   .1069750E-02   .1759839E-02
   .1774482E-02   .2268805E-02   .2939755E-02   .3107790E-02   .3650988E-02
   .4305157E-02   .4385273E-02   .4209109E-02   .4092573E-02   .3476195E-02
   .2861593E-02   .2917151E-02   .3227654E-02   .3219938E-02   .2400455E-02
   .1436148E-02   .1399510E-02   .1789681E-02   .1863430E-02   .1734700E-02
   .2269755E-02   .3179963E-02   .3327753E-02   .3084868E-02   .3647431E-02
   .4651110E-02   .4763397E-02   .3773632E-02   .2816136E-02   .3035452E-02
   .3686631E-02   .3921131E-02   .3795717E-02   .3607850E-02   .3017853E-02
   .2301239E-02   .2276100E-02   .2488820E-02   .1925739E-02   .9303375E-03
   .1900184E-03  -.2383088E-03  -.1072213E-03   .9345971E-04  -.8910357E-05
  -.2326254E-03  -.2941806E-03  -.1940224E-03  -.1502153E-03  -.2224579E-03
  -.3137638E-03  -.2959433E-03   .2393226E-03   .1126663E-02   .1252911E-02
   .3650570E-03  -.7256108E-03  -.7529071E-03  -.1933678E-03   .5627889E-04
  -.1197099E-03  -.2946809E-03  -.2623937E-03  -.1564695E-03  -.1151048E-03
  -.1462562E-03  -.2215854E-03  -.2780217E-03  -.3152823E-03  -.8482274E-03
  -.2235072E-02  -.3258761E-02  -.3073443E-02  -.2595060E-02  -.2624669E-02
  -.2977442E-02  -.3190846E-02  -.3162350E-02  -.3056374E-02  -.3046033E-02
  -.3529930E-02  -.3952199E-02  -.3641691E-02  -.3486780E-02  -.3423317E-02
  -.3634194E-02  -.3640859E-02  -.4136768E-02  -.4334631E-02  -.4103928E-02
  -.3898715E-02  -.3873330E-02  -.3468371E-02  -.2636349E-02  -.2446683E-02
  -.2748510E-02  -.2880065E-02  -.2730841E-02  -.2574266E-02  -.2581120E-02
  -.2686828E-02  -.2765876E-02  -.2785623E-02  -.2777408E-02  -.2760529E-02
  -.2742350E-02  -.2765778E-02  -.3141829E-02  -.4053786E-02  -.4427589E-02
  -.4155206E-02  -.3634379E-02  -.2890785E-02  -.2706163E-02  -.3017565E-02
  -.3174797E-02  -.3022936E-02  -.2833393E-02  -.2782550E-02  -.2787860E-02
  -.2445179E-02  -.1500339E-02  -.7260138E-03  -.3621614E-04   .1219275E-03
  -.8573497E-04  -.1404546E-03   .1877043E-04   .1766953E-03   .2301996E-03
   .2410997E-03   .2633253E-03   .2806172E-03   .2630577E-03   .1898065E-03
   .8707507E-04   .4389957E-04  -.1230265E-04  -.5960974E-04  -.6530903E-04
  -.4022778E-04  -.2011661E-04  -.1638608E-04  -.8621160E-05   .2751825E-04
   .6797155E-04   .4195841E-03   .1323959E-02   .1727934E-02   .1482844E-02
   .9488804E-03   .1732179E-03   .1896274E-04   .6859271E-03   .1716449E-02
   .1941914E-02   .1852148E-02   .2518177E-02   .3063502E-02   .2995913E-02
   .2479364E-02   .1580033E-02   .1426167E-02   .2564731E-02   .3275161E-02
   .2958679E-02   .2561218E-02   .2640278E-02   .2928992E-02   .3065469E-02
   .3027896E-02   .2970722E-02   .2973517E-02   .3038249E-02   .3340465E-02
   .4278488E-02   .4586354E-02   .3405817E-02   .2580539E-02   .2882949E-02
   .3358011E-02   .3357428E-02   .3093952E-02   .2957670E-02   .3004175E-02
   .3070329E-02   .3068488E-02   .3023144E-02   .2969013E-02   .2911778E-02
   .2854963E-02   .2803172E-02   .2756873E-02   .2708570E-02   .2674490E-02
   .2684315E-02   .2734253E-02   .2798639E-02   .2814369E-02   .2818058E-02
   .2893422E-02   .2940729E-02   .2860102E-02   .2799823E-02   .2807697E-02
   .2787410E-02   .2729692E-02   .2694342E-02   .2716963E-02   .2780677E-02
   .2846042E-02   .2899495E-02   .2968921E-02   .3015878E-02   .2996823E-02
   .2953214E-02   .2929340E-02   .2932168E-02   .2950965E-02   .3017882E-02
   .3089538E-02   .3110565E-02   .3108371E-02   .3112604E-02   .3116385E-02
   .3112020E-02   .3145408E-02   .3054060E-02   .2181110E-02   .7984704E-03
   .2983367E-03   .7861514E-03   .1295563E-02   .1222305E-02   .8642207E-03
   .6774473E-03   .3119208E-03   .1963319E-04   .1856361E-03  -.8220683E-03
  -.2237873E-02  -.2491910E-02  -.2066797E-02  -.1912897E-02  -.2073918E-02
  -.1665971E-02  -.2650474E-03   .4525353E-03  -.4956175E-03  -.1670385E-02
  -.2237389E-02  -.1906968E-02  -.1442865E-02  -.1410680E-02  -.1648466E-02
  -.1735937E-02  -.1636584E-02  -.1103145E-02  -.3005617E-03  -.2745545E-03
  -.1180464E-02  -.2236477E-02  -.2287536E-02  -.1777665E-02  -.1077906E-02
   .1326790E-03   .1076954E-02   .9664134E-03   .5678932E-03   .5780374E-03
   .8027329E-03   .8965725E-03   .8203324E-03   .2442881E-03  -.6157378E-03
  -.6939602E-03   .1529809E-03   .1160346E-02   .1191689E-02   .7427916E-03
   .6333908E-03   .8769170E-03   .1084202E-02   .1096844E-02   .1010183E-02
   .9451749E-03   .9750674E-03   .9631148E-03   .9344234E-03   .9180701E-03
   .8699275E-03   .8698091E-03   .8966276E-03   .9589654E-03   .7132739E-03
   .2074107E-03   .7280507E-03   .1339427E-02   .1251548E-02   .9623270E-03
   .1352777E-02   .2492866E-02   .3030045E-02   .3115474E-02   .3467857E-02
   .3060331E-02   .2585662E-02   .2958689E-02   .4086129E-02   .4462294E-02
   .4015205E-02   .3698006E-02   .3828346E-02   .3991016E-02   .3989589E-02
   .3911817E-02   .3500107E-02   .2560225E-02   .2165583E-02   .2378866E-02
   .2205216E-02   .1194459E-02   .6933550E-03   .9819485E-03   .1294000E-02
   .1251768E-02   .7789890E-03  -.1594651E-03  -.4512665E-03  -.7736125E-04
   .2025498E-03   .4463455E-03   .1157895E-02   .1489390E-02   .1208349E-02
   .9484283E-03   .9607381E-03   .6992311E-03  -.5511236E-03  -.1914964E-02
  -.2078704E-02  -.1615732E-02  -.1528415E-02  -.1846628E-02  -.2095984E-02
  -.2075501E-02  -.1937225E-02  -.1851932E-02  -.1838534E-02  -.1838856E-02
  -.1827087E-02  -.1809759E-02  -.1811132E-02  -.1822883E-02  -.1750640E-02
  -.1670450E-02  -.1655625E-02  -.1680245E-02  -.1724070E-02  -.2105151E-02
  -.3060162E-02  -.3462945E-02  -.3211500E-02  -.3014206E-02  -.3136848E-02
  -.3633696E-02  -.4519017E-02  -.4791393E-02  -.4480306E-02  -.4301692E-02
  -.4453244E-02  -.4647655E-02  -.4686186E-02  -.4547982E-02  -.3719785E-02
  -.1898654E-02  -.1256982E-02  -.1900934E-02  -.2364228E-02  -.2169664E-02
  -.1836568E-02  -.1767823E-02  -.2054620E-02  -.2945525E-02  -.3408837E-02
  -.3054169E-02  -.2852568E-02  -.3772006E-02  -.4453947E-02  -.4210899E-02
  -.3805764E-02  -.3736113E-02  -.3890326E-02  -.3804840E-02  -.2703303E-02
  -.1385026E-02  -.1789426E-02  -.1960365E-02  -.1426116E-02  -.1151327E-02
  -.1456970E-02  -.2498404E-02  -.3056148E-02  -.2523036E-02  -.1272177E-02
  -.8309566E-03  -.1309671E-02  -.1678376E-02  -.1561943E-02  -.1309075E-02
  -.1052508E-02  -.2744089E-03   .1257321E-03   .1024311E-03   .5981097E-03
   .5169964E-03   .8266552E-03   .1363765E-02   .1416054E-02   .1156620E-02
   .1038638E-02   .1118798E-02   .1199407E-02   .1194430E-02   .1153224E-02
   .1147263E-02   .1182431E-02   .1215787E-02   .1218310E-02   .1177656E-02
   .1313610E-02   .2165434E-02   .2894501E-02   .2631772E-02   .1485589E-02
   .7944914E-03   .1123119E-02   .1563756E-02   .1488209E-02   .1174886E-02
   .1030264E-02   .1033196E-02   .1070706E-02   .1032112E-02   .9469310E-03
   .9450537E-03   .1169692E-02   .2174088E-02   .3717518E-02   .4367734E-02
   .3963847E-02   .3679707E-02   .3886577E-02   .4149284E-02   .4181746E-02
   .4073318E-02   .4009902E-02   .4030605E-02   .4064031E-02   .4061482E-02
   .4013034E-02   .3903378E-02   .3795439E-02   .3624042E-02   .2984642E-02
   .3047440E-02   .3623635E-02   .3008897E-02   .2183946E-02   .2826413E-02
   .3650768E-02   .2838039E-02   .1697667E-02   .1517122E-02   .1392962E-02
   .1543723E-02   .1496538E-02   .1538917E-02   .2066330E-02   .2230185E-02
   .2029249E-02   .1893964E-02   .1939715E-02   .1935814E-02   .1264208E-02
   .3928138E-03   .3669611E-03   .7510617E-03   .8689286E-03   .7110826E-03
   .5590089E-03   .5487348E-03   .6415382E-03   .7144615E-03   .7166732E-03
   .6890038E-03   .6735710E-03   .6399836E-03   .6011161E-03   .6038748E-03
   .5995186E-03   .5585853E-03   .4643057E-03   .3674984E-03   .3445012E-03
   .3623768E-03   .3651414E-03   .3589928E-03   .3548917E-03   .3322652E-03
   .3476860E-03   .3897254E-03   .3830663E-03   .3848225E-03   .4173591E-03
   .4513479E-03   .4612032E-03   .4525513E-03   .4106338E-03   .3690443E-03
   .3081822E-03  -.3145798E-03  -.1797581E-02  -.2947872E-02  -.2840649E-02
  -.2375915E-02  -.2382751E-02  -.2738866E-02  -.3420752E-02  -.4330018E-02
  -.5009723E-02  -.5598751E-02  -.5674870E-02  -.5479047E-02  -.4986349E-02
  -.4287561E-02  -.4660797E-02  -.5785472E-02  -.6010153E-02  -.5497426E-02
  -.5199569E-02  -.5333332E-02  -.5488156E-02  -.4973584E-02  -.3940339E-02
  -.3221700E-02  -.2661460E-02  -.2625875E-02  -.2809084E-02  -.2806863E-02
  -.2693900E-02  -.3071665E-02  -.3516561E-02  -.3342812E-02  -.3231264E-02
  -.2706865E-02  -.2522695E-02  -.3051422E-02  -.3732604E-02  -.3150344E-02
  -.2427639E-02  -.2490221E-02  -.2874971E-02  -.3012019E-02  -.2903114E-02
  -.2772865E-02  -.2372111E-02  -.1177823E-02  -.6754190E-03  -.2433871E-02
  -.3649150E-02  -.3199611E-02  -.2500632E-02  -.2494356E-02  -.2842894E-02
  -.2980629E-02  -.2850865E-02  -.2668235E-02  -.2221997E-02  -.9605895E-03
   .2693809E-03   .3591344E-03  -.1020510E-03  -.5312651E-03  -.1467343E-02
  -.2511646E-02  -.2608118E-02  -.2155341E-02  -.1408941E-02  -.2361934E-03
  -.2902808E-03  -.3585252E-03  -.1186847E-03   .2938540E-04   .4418653E-04
   .5151429E-04   .8598921E-04   .1151659E-03   .1474535E-03   .5419138E-03
   .1839570E-02   .3113104E-02   .3204656E-02   .2748841E-02   .2654630E-02
   .2632076E-02   .2323413E-02   .2821364E-02   .3324220E-02   .3196267E-02
   .2883880E-02   .2820831E-02   .2935685E-02   .3009981E-02   .2990750E-02
   .2953955E-02   .2958506E-02   .2985405E-02   .3007150E-02   .3016246E-02
   .3054439E-02   .3454557E-02   .4428105E-02   .4838730E-02   .4549745E-02
   .4001803E-02   .3531254E-02   .3929849E-02   .4037584E-02   .4092792E-02
   .3443375E-02   .2932938E-02   .3049885E-02   .3291469E-02   .3280688E-02
   .3123170E-02   .3035887E-02   .3058524E-02   .3107603E-02   .3125375E-02
   .3122189E-02   .3119343E-02   .3116735E-02   .3097870E-02   .3063310E-02
   .3048876E-02   .3259715E-02   .4215518E-02   .4791001E-02   .4574423E-02
   .4482276E-02   .5224472E-02   .5045175E-02   .4372902E-02   .4477201E-02
   .5650592E-02   .6308837E-02   .5994696E-02   .5628586E-02   .5705149E-02
   .5958768E-02   .6063093E-02   .6004849E-02   .5924222E-02   .5902507E-02
   .5914903E-02   .5921319E-02   .5918755E-02   .5913288E-02   .5910603E-02
   .5910930E-02   .5909010E-02   .5907419E-02   .5913398E-02   .5917202E-02
   .5914091E-02   .5886823E-02   .5642900E-02   .4517362E-02   .3045474E-02
   .2737572E-02   .3298937E-02   .3758811E-02   .4411996E-02   .4961137E-02
   .5569578E-02   .6013848E-02   .5812105E-02   .4875856E-02   .4103219E-02
   .3539790E-02   .3227731E-02   .3341934E-02   .3334400E-02   .2491842E-02
   .1681195E-02   .1565169E-02   .1045340E-02   .3323445E-03   .2102191E-03
   .3690922E-03   .3615341E-03   .2128690E-03   .1289975E-03   .1495100E-03
   .6014593E-04  -.6991477E-03  -.1541876E-02  -.2305738E-02  -.2747286E-02
  -.2648589E-02  -.2509110E-02  -.2669659E-02  -.3451215E-02  -.4282910E-02
  -.4256467E-02  -.3814675E-02  -.3114682E-02  -.2576550E-02  -.3233453E-02
  -.3708346E-02  -.2954981E-02  -.2417069E-02  -.2569817E-02  -.2854655E-02
  -.2876892E-02  -.2750951E-02  -.2695757E-02  -.2809984E-02  -.3483121E-02
  -.4284630E-02  -.4389463E-02  -.4752584E-02  -.5546984E-02  -.5753468E-02
  -.5525620E-02  -.5415221E-02  -.5508705E-02  -.5595686E-02  -.5562877E-02
  -.5490659E-02  -.5461542E-02  -.5481653E-02  -.5516310E-02  -.5501070E-02
  -.4979187E-02  -.4050278E-02  -.3864622E-02  -.4176170E-02  -.3870709E-02
  -.3344524E-02  -.3924759E-02  -.4925698E-02  -.5274158E-02  -.4833964E-02
  -.5228356E-02  -.5732481E-02  -.5746356E-02  -.5557402E-02  -.5489322E-02
  -.5537880E-02  -.5560628E-02  -.5511880E-02  -.5446455E-02  -.5415425E-02
  -.5423688E-02  -.5449033E-02  -.5474228E-02  -.5487576E-02  -.5488533E-02
  -.5436314E-02  -.4891776E-02  -.3921448E-02  -.3307673E-02  -.2791601E-02
  -.2675612E-02  -.2819918E-02  -.2846998E-02  -.2730888E-02  -.2652741E-02
  -.2691223E-02  -.2784485E-02  -.2801114E-02  -.2749989E-02  -.2712239E-02
  -.2716205E-02  -.2736280E-02  -.2746563E-02  -.2750554E-02  -.2748452E-02
  -.2746429E-02  -.2772645E-02  -.2838891E-02  -.2866335E-02  -.2845889E-02
  -.2825322E-02  -.2775639E-02  -.2087852E-02  -.3394614E-03   .3633149E-03
  -.1693657E-03  -.5762382E-03  -.3808369E-03  -.5131583E-04   .2629815E-04
  -.9344549E-04  -.2319940E-03  -.2511814E-03  -.1867156E-03  -.1431025E-03
  -.1440256E-03  -.1540931E-03  -.1442558E-03  -.1288652E-03  -.1395341E-03
  -.1928742E-03  -.1806309E-03  -.1776959E-03  -.1621594E-03   .2971672E-03
   .2179739E-02   .3288494E-02   .2840567E-02   .2294629E-02   .2433415E-02
   .2830574E-02   .2963411E-02   .2802309E-02   .2656324E-02   .2821436E-02
   .3846041E-02   .5223496E-02   .4810139E-02   .2809402E-02   .1854592E-02
   .2454317E-02   .3063552E-02   .2931316E-02   .2530133E-02   .2393165E-02
   .2502303E-02   .2600750E-02   .2592737E-02   .2548703E-02   .2538786E-02
   .2554312E-02   .2556043E-02   .2526963E-02   .2491319E-02   .2465696E-02
   .2452172E-02   .2450946E-02   .2462393E-02   .2483140E-02   .2509182E-02
   .2528118E-02   .2498842E-02   .2446780E-02   .2441887E-02   .2455562E-02
   .2446258E-02   .2425777E-02   .2425251E-02   .2455179E-02   .2493047E-02
   .2513034E-02   .2477992E-02   .2424001E-02   .2421150E-02   .2437548E-02
   .2429969E-02   .2372631E-02   .2313446E-02   .2328393E-02   .2372869E-02
   .2396699E-02   .2384409E-02   .2349843E-02   .2312251E-02   .2250180E-02
   .2175234E-02   .2151236E-02   .2163679E-02   .2176305E-02   .2185577E-02
   .2202322E-02   .2222877E-02   .2237041E-02   .2227539E-02   .2200477E-02
   .2173470E-02   .2151560E-02   .2101241E-02   .2045245E-02   .2043666E-02
   .2063608E-02   .2066317E-02   .2055212E-02   .2055187E-02   .2074607E-02
   .2093965E-02   .2099458E-02   .2091535E-02   .2084001E-02   .2080199E-02
   .2074718E-02   .2068339E-02   .2071657E-02   .2086543E-02   .2103654E-02
   .2115307E-02   .2115963E-02   .2067078E-02   .1520501E-02   .5739123E-03
   .3325291E-03   .1584062E-03  -.5901451E-03  -.9453788E-03  -.8245286E-03
  -.7177987E-03  -.7694921E-03  -.8695133E-03  -.8791492E-03  -.8764513E-03
  -.8676528E-03  -.8569831E-03  -.8585503E-03  -.8742743E-03  -.8966091E-03
  -.9386418E-03  -.9719738E-03  -.9660675E-03  -.1008903E-02  -.1052927E-02
  -.1069891E-02  -.1082626E-02  -.1101400E-02  -.1117246E-02  -.1169121E-02
  -.1752773E-02  -.3192093E-02  -.4256057E-02  -.4096515E-02  -.3634078E-02
  -.3652853E-02  -.3987713E-02  -.4177907E-02  -.4114103E-02  -.4053404E-02
  -.4072404E-02  -.4111247E-02  -.4120919E-02  -.4111549E-02  -.4104458E-02
  -.4136453E-02  -.4564440E-02  -.5102796E-02  -.4441900E-02  -.3750304E-02
  -.3849738E-02  -.4189694E-02  -.4242344E-02  -.4082056E-02  -.3976280E-02
  -.4045861E-02  -.4511110E-02  -.5445675E-02  -.6114470E-02  -.6733289E-02
  -.6874200E-02  -.6632805E-02  -.6582301E-02  -.6805841E-02  -.6947877E-02
  -.6870011E-02  -.6790148E-02  -.6846180E-02  -.6893849E-02  -.6836218E-02
  -.6796153E-02  -.6834746E-02  -.6869257E-02  -.6471175E-02  -.5520788E-02
  -.5164107E-02  -.5492084E-02  -.6068675E-02  -.6846719E-02  -.7035302E-02
  -.6731883E-02  -.6558914E-02  -.6383623E-02  -.6027381E-02  -.6581163E-02
  -.7153865E-02  -.7062848E-02  -.6770085E-02  -.6718136E-02  -.6848476E-02
  -.6934013E-02  -.6920475E-02  -.6884043E-02  -.6862899E-02  -.6506485E-02
  -.5254338E-02  -.3951395E-02  -.3824895E-02  -.4298110E-02  -.4395421E-02
  -.4091650E-02  -.3846742E-02  -.3845915E-02  -.3942279E-02  -.3982647E-02
  -.3969668E-02  -.3963665E-02  -.3995113E-02  -.4199895E-02  -.4698313E-02
  -.3162518E-02  -.8490069E-03  -.4365982E-03  -.1279593E-02  -.1435743E-02
  -.1674098E-03   .7669435E-03   .7748669E-03   .1064543E-02   .6453782E-03
   .6872648E-04   .1348571E-03   .4247755E-03   .2884569E-03  -.5390568E-03
  -.2814379E-03   .4799466E-03   .5843554E-03   .2945352E-03   .3885177E-03
   .1455617E-02   .2126058E-02   .1903680E-02   .1988282E-02   .3881680E-02
   .5178353E-02   .4790953E-02   .4198844E-02   .4682535E-02   .6683647E-02
   .7234781E-02   .7071558E-02   .7173562E-02   .7329761E-02   .7201828E-02
   .6143575E-02   .4928565E-02   .5317641E-02   .5446634E-02   .4920278E-02
   .4842775E-02   .5848278E-02   .6714411E-02   .7378191E-02   .7573678E-02
   .7396966E-02   .7338735E-02   .7482043E-02   .7603232E-02   .7599916E-02
   .7544272E-02   .7519301E-02   .7532645E-02   .7547343E-02   .7545964E-02
   .7532385E-02   .7525216E-02   .7527860E-02   .7533577E-02   .7540280E-02
   .7547920E-02   .7547496E-02   .7532391E-02   .7516205E-02   .7531607E-02
   .7885146E-02   .9409606E-02   .1007266E-01   .1001295E-01   .1011260E-01
   .1009053E-01   .9317788E-02   .8898331E-02   .9586567E-02   .9235157E-02
   .9152997E-02   .9466722E-02   .9149255E-02   .8884292E-02   .8952829E-02
   .8953474E-02   .8298613E-02   .8317922E-02   .8921686E-02   .8463356E-02
   .8266290E-02   .8877905E-02   .9178894E-02   .9010823E-02   .8863202E-02
   .9058944E-02   .9802051E-02   .9740686E-02   .9072165E-02   .9456214E-02
   .9777774E-02   .9825531E-02   .9283246E-02   .7861945E-02   .7118254E-02
   .7488764E-02   .7895850E-02   .7788428E-02   .7475665E-02   .7214840E-02
   .6517447E-02   .5786978E-02   .5115396E-02   .4721508E-02   .4818407E-02
   .4956282E-02   .4884951E-02   .4748609E-02   .4707098E-02   .4729313E-02
   .4593553E-02   .3750437E-02   .2871423E-02   .2196245E-02   .1854755E-02
   .1960793E-02   .2065979E-02   .1959773E-02   .1805105E-02   .1752561E-02
   .1767678E-02   .1760485E-02   .1597116E-02   .9151087E-03   .1020878E-02
   .1830919E-02   .1894984E-02   .7464435E-03  -.1912871E-03  -.1506996E-03
  -.4495364E-03  -.1067334E-02  -.1200177E-02  -.1030683E-02  -.9806658E-03
  -.1084733E-02  -.1166685E-02  -.1162650E-02  -.1135818E-02  -.1268661E-02
  -.1951447E-02  -.1876105E-02  -.1241877E-02  -.2029022E-02  -.3932166E-02
  -.4609945E-02  -.4004225E-02  -.3571596E-02  -.3784034E-02  -.4133446E-02
  -.4213915E-02  -.4113735E-02  -.4048747E-02  -.4074094E-02  -.4113222E-02
  -.4114704E-02  -.4096646E-02  -.4102552E-02  -.4334845E-02  -.5303757E-02
  -.5886825E-02  -.5857466E-02  -.6459005E-02  -.7042851E-02  -.7014997E-02
  -.6816388E-02  -.6824359E-02  -.6956230E-02  -.7018179E-02  -.6983060E-02
  -.6944587E-02  -.6947284E-02  -.6960893E-02  -.6958415E-02  -.6948400E-02
  -.6939749E-02  -.6939990E-02  -.6943975E-02  -.6950294E-02  -.6992265E-02
  -.7385753E-02  -.8361447E-02  -.9088878E-02  -.9679845E-02  -.9816019E-02
  -.9651335E-02  -.9621380E-02  -.9762901E-02  -.9874198E-02  -.9873324E-02
  -.9807071E-02  -.9459794E-02  -.8911847E-02  -.9120217E-02  -.9175156E-02
  -.9287815E-02  -.9054601E-02  -.9435941E-02  -.9867174E-02  -.9817287E-02
  -.9612012E-02  -.9584420E-02  -.9690944E-02  -.9787700E-02  -.1010950E-01
  -.1063668E-01  -.1043290E-01  -.1036264E-01  -.9917368E-02  -.9607261E-02
  -.9741241E-02  -.9921165E-02  -.9891069E-02  -.9725069E-02  -.9121452E-02
  -.7725135E-02  -.6630462E-02  -.6756026E-02  -.7232121E-02  -.7235815E-02
  -.6928229E-02  -.6758892E-02  -.6817476E-02  -.6921555E-02  -.6939430E-02
  -.6901237E-02  -.6874368E-02  -.6876287E-02  -.6881585E-02  -.6826318E-02
  -.6262571E-02  -.4854297E-02  -.3749502E-02  -.3878311E-02  -.4396949E-02
  -.4472534E-02  -.4156950E-02  -.3937050E-02  -.4021019E-02  -.4094731E-02
  -.3399672E-02  -.1760731E-02  -.8150040E-03  -.1147647E-02  -.1610995E-02
  -.1521897E-02  -.1202378E-02  -.1081369E-02  -.1163175E-02  -.1245296E-02
  -.1236497E-02  -.1189275E-02  -.1160547E-02  -.1090407E-02  -.5043970E-03
   .3144169E-03   .1019004E-02   .1575751E-02   .1549383E-02   .1359573E-02
   .1395615E-02   .1558596E-02   .1623001E-02   .1536967E-02   .1478249E-02
   .1483694E-02   .1538718E-02   .1610244E-02   .1628350E-02   .1572648E-02
   .1537238E-02   .1584825E-02   .1818529E-02   .2635933E-02   .3417758E-02
   .4049530E-02   .4405628E-02   .4321027E-02   .4211710E-02   .4292472E-02
   .4429593E-02   .4478104E-02   .4451468E-02   .4426897E-02   .4438272E-02
   .4477207E-02   .4554809E-02   .4583197E-02   .4521502E-02   .4522900E-02
   .4533109E-02   .4542198E-02   .4599435E-02   .4611975E-02   .4534180E-02
   .4514810E-02   .4501091E-02   .4479791E-02   .4512916E-02   .4491858E-02
   .4467810E-02   .4681513E-02   .5431668E-02   .5038035E-02   .4224727E-02
   .4168684E-02   .4525984E-02   .4663664E-02   .4532231E-02   .4404650E-02
   .4406650E-02   .4470313E-02   .4478529E-02   .4399359E-02   .4353828E-02
   .4383528E-02   .4414545E-02   .4384531E-02   .4329113E-02   .4673551E-02
   .5651425E-02   .6366236E-02   .6986824E-02   .7153450E-02   .6985755E-02
   .6913570E-02   .6984913E-02   .7071411E-02   .7088236E-02   .7054804E-02
   .7028903E-02   .7032140E-02   .7010713E-02   .6955037E-02   .6929920E-02
   .6906650E-02   .6849093E-02   .6824341E-02   .6829482E-02   .6829998E-02
   .6822520E-02   .6815016E-02   .6781934E-02   .6726722E-02   .6644334E-02
   .6024313E-02   .5188766E-02   .5169799E-02   .6154739E-02   .7099033E-02
   .6965606E-02   .6436676E-02   .6309070E-02   .6554136E-02   .6746063E-02
   .6721892E-02   .6612041E-02   .6548682E-02   .6507853E-02   .6481241E-02
   .6475809E-02   .6463002E-02   .6398233E-02   .6338909E-02   .6343308E-02
   .6369897E-02   .6346907E-02   .6091524E-02   .5108808E-02   .4524184E-02
   .4556145E-02   .3939149E-02   .3303124E-02   .3515247E-02   .4485059E-02
   .4112777E-02   .3166029E-02   .3026892E-02   .3394630E-02   .3569568E-02
   .3437819E-02   .3266090E-02   .3196145E-02   .3231240E-02   .3278049E-02
   .3276518E-02   .3244050E-02   .3169609E-02   .2578690E-02   .1143829E-02
   .7959838E-04   .2388606E-03   .6749169E-03   .6302229E-03   .3651683E-03
   .1916167E-03  -.3127558E-03  -.1234689E-02  -.1925227E-02  -.2483383E-02
  -.2527349E-02  -.2363784E-02  -.2494708E-02  -.3335661E-02  -.4220458E-02
  -.4206289E-02  -.3904631E-02  -.4470080E-02  -.5464243E-02  -.5624914E-02
  -.5270007E-02  -.5130115E-02  -.5295330E-02  -.5503344E-02  -.5657988E-02
  -.6330809E-02  -.7111562E-02  -.7734439E-02  -.7410739E-02  -.6640507E-02
  -.6697134E-02  -.7869881E-02  -.8765081E-02  -.8557651E-02  -.8095394E-02
  -.8083847E-02  -.8377679E-02  -.8481807E-02  -.8390778E-02  -.8367556E-02
  -.8414972E-02  -.8438352E-02  -.8428798E-02  -.8415844E-02  -.8392876E-02
  -.8353260E-02  -.8354207E-02  -.8014235E-02  -.7366312E-02  -.7529291E-02
  -.6860201E-02  -.5506804E-02  -.5190221E-02  -.5683068E-02  -.6322799E-02
  -.6459361E-02  -.5570195E-02  -.5041632E-02  -.5294187E-02  -.5631396E-02
  -.5641853E-02  -.5514933E-02  -.5446444E-02  -.5431980E-02  -.5459671E-02
  -.5482745E-02  -.5477585E-02  -.5455569E-02  -.5440703E-02  -.5443297E-02
  -.5451253E-02  -.5451738E-02  -.5434768E-02  -.5376651E-02  -.5350597E-02
  -.5373053E-02  -.5402259E-02  -.5401524E-02  -.5363803E-02  -.5075963E-02
  -.3776022E-02  -.2359297E-02  -.2227023E-02  -.2756574E-02  -.2883560E-02
  -.2581502E-02  -.2343521E-02  -.2353666E-02  -.2447429E-02  -.2430611E-02
  -.1888153E-02  -.9363010E-03  -.2604530E-03  -.1002916E-03  -.3313212E-03
   .1681310E-03   .5662736E-03   .5173753E-03   .3746407E-03   .3771567E-03
   .4584652E-03   .4924786E-03   .4636672E-03   .4293511E-03   .4279542E-03
   .4437765E-03   .4579461E-03   .4660398E-03   .4866620E-03   .7071572E-03
   .1624157E-02   .2378349E-02   .3097433E-02   .3174622E-02   .2293264E-02
   .2608628E-02   .3478516E-02   .3644347E-02   .3332586E-02   .3169576E-02
   .3272174E-02   .3383352E-02   .3364529E-02   .3315315E-02   .3261891E-02
   .3252406E-02   .3268952E-02   .3267907E-02   .3251788E-02   .3244917E-02
   .3257598E-02   .3352754E-02   .3999042E-02   .4810656E-02   .4938020E-02
   .5310497E-02   .6108375E-02   .6320284E-02   .6099743E-02   .5997943E-02
   .5971673E-02   .5404663E-02   .5353742E-02   .5437055E-02   .5716306E-02
   .6148686E-02   .5977026E-02   .4986878E-02   .4293851E-02   .4682500E-02
   .5937419E-02   .6517159E-02   .6111088E-02   .5721666E-02   .5814998E-02
   .6064249E-02   .5961775E-02   .5213126E-02   .5523800E-02   .6290999E-02
   .6369050E-02   .5840563E-02   .4801486E-02   .4362953E-02   .4443252E-02
   .3754974E-02   .3196878E-02   .3281954E-02   .3480443E-02   .3448982E-02
   .3278651E-02   .2866753E-02   .2306446E-02   .2562121E-02   .2634023E-02
   .2731057E-02   .2108689E-02   .1552696E-02   .1311373E-02   .9919156E-03
   .1172261E-02   .7699638E-03   .2729188E-03   .2621406E-03   .4172713E-03
   .4246480E-03   .3687381E-03   .3319552E-03   .3253088E-03   .3314946E-03
   .3396855E-03   .3417884E-03   .3436724E-03   .3519727E-03   .3630315E-03
   .3727414E-03   .3810781E-03   .3848944E-03   .3894276E-03   .3992469E-03
   .4109497E-03   .4150576E-03   .4061629E-03   .3858336E-03   .2916090E-03
  -.3184357E-03  -.5936250E-03  -.4684972E-03  -.9509965E-03  -.1338444E-02
  -.1893587E-02  -.2574598E-02  -.2638163E-02  -.2399988E-02  -.2356216E-02
  -.2501491E-02  -.2604914E-02  -.2585556E-02  -.2523775E-02  -.2498778E-02
  -.2511489E-02  -.2521963E-02  -.2511500E-02  -.2497269E-02  -.2492347E-02
  -.2502749E-02  -.2647427E-02  -.3306760E-02  -.3194234E-02  -.2387401E-02
  -.2195694E-02  -.2743290E-02  -.3910545E-02  -.4394235E-02  -.4022693E-02
  -.3703433E-02  -.3619487E-02  -.3128524E-02  -.3585194E-02  -.4312280E-02
  -.4289786E-02  -.3733620E-02  -.2885825E-02  -.3221050E-02  -.3420662E-02
  -.3866626E-02  -.4267635E-02  -.4154823E-02  -.3720310E-02  -.2764780E-02
  -.2331260E-02  -.2635134E-02  -.2911183E-02  -.3027389E-02  -.3763431E-02
  -.4057880E-02  -.3129762E-02  -.3058756E-02  -.2961945E-02  -.2624112E-02
  -.2586876E-02  -.2904835E-02  -.3655554E-02  -.3186451E-02  -.2330558E-02
  -.2286867E-02  -.2663109E-02  -.2800638E-02  -.2656170E-02  -.2515573E-02
  -.2514914E-02  -.2576631E-02  -.2601284E-02  -.2578302E-02  -.2554408E-02
  -.2548739E-02  -.2549271E-02  -.2550307E-02  -.2552149E-02  -.2559569E-02
  -.2569327E-02  -.2572616E-02  -.2577822E-02  -.2587021E-02  -.2591097E-02
  -.2577654E-02  -.2347969E-02  -.1218928E-02   .2780422E-03   .6215503E-03
   .1018482E-03  -.1319582E-03   .1260071E-03   .4027531E-03   .4245267E-03
   .3145048E-03   .2654911E-03   .2959409E-03   .3358511E-03   .3402598E-03
   .3235608E-03   .3141073E-03   .3019894E-03   .1202870E-03  -.6437880E-03
  -.5631450E-03  -.4054625E-03  -.4324419E-03  -.1407861E-02  -.1968701E-02
  -.1150761E-02   .1398652E-03   .6759795E-03   .2908769E-03  -.5508461E-04
   .5519367E-04   .3043064E-03   .3801403E-03   .3053222E-03   .2334631E-03
   .2344784E-03   .2681516E-03   .2854867E-03   .2772301E-03   .2646658E-03
   .2634846E-03   .2709312E-03   .2824881E-03   .2921190E-03   .2964973E-03
   .2969019E-03   .3036588E-03   .3149059E-03   .3149248E-03   .2656407E-03
   .2295655E-03   .2923271E-03   .3569754E-03   .3467472E-03   .3010690E-03
   .2439622E-03   .2627525E-03   .3191163E-03   .2878441E-03   .2663026E-03
   .2947384E-03   .2710460E-03   .2578132E-03   .2467951E-03   .2416525E-03
   .5529126E-03   .2167018E-02   .3453260E-02   .2487359E-02   .1158366E-02
   .1234429E-02   .1921182E-02   .1991284E-02   .9507160E-03   .6938129E-06
   .5895625E-04   .4648061E-03   .5457134E-03   .5236220E-03   .1059779E-02
   .1120290E-02   .1178012E-02   .1657094E-02   .1838407E-02   .1716419E-02
   .1635325E-02   .1695081E-02   .1773458E-02   .1789187E-02   .1763098E-02
   .1744549E-02   .1736599E-02   .1594953E-02   .8206718E-03   .1484283E-03
   .2441714E-03   .5499719E-03   .5604013E-03   .3856730E-03   .2952821E-03
   .3313160E-03   .3851524E-03   .3941914E-03   .3826365E-03   .3807637E-03
   .3873290E-03   .3966114E-03   .3995719E-03   .3966936E-03   .3941061E-03
   .3931786E-03   .3878660E-03   .3860240E-03   .3913671E-03   .3896170E-03
   .3830014E-03   .3785049E-03   .3666249E-03   .3586436E-03   .3530345E-03
   .3456362E-03   .3426049E-03   .3436907E-03   .3439108E-03   .3421250E-03
   .3400173E-03   .3366176E-03   .3229010E-03   .3122589E-03   .3026238E-03
   .2994854E-03   .3016931E-03   .3021622E-03   .3016722E-03   .3096587E-03
   .3276341E-03   .3390299E-03   .3364749E-03   .3307041E-03   .3304692E-03
   .3318437E-03   .3214331E-03   .3088703E-03   .2981377E-03   .2913576E-03
   .2881364E-03   .2839278E-03   .2691214E-03   .2220018E-03   .2688552E-03
   .5239663E-03   .1224155E-02   .1018400E-02   .9315825E-03   .5194769E-03
   .1054941E-03   .1751336E-03   .3755708E-03   .3828167E-03   .2638678E-03
   .1909818E-03   .2001661E-03   .2274064E-03   .2265002E-03   .2098466E-03
   .1966078E-03   .1941400E-03   .1993507E-03   .2065359E-03   .2088454E-03
   .2037801E-03   .1847008E-03  -.2644552E-04  -.7589319E-03  -.3814824E-03
   .1930938E-03  -.7172678E-03  -.1625147E-02  -.1459204E-02  -.1007682E-02
  -.9733592E-03  -.1200807E-02  -.1328141E-02  -.1290015E-02  -.1220622E-02
  -.1210286E-02  -.1254793E-02  -.1486371E-02  -.2379019E-02  -.2882286E-02
  -.2447075E-02  -.1447598E-02  -.1907938E-02  -.2899550E-02  -.3000452E-02
  -.2527855E-02  -.2304850E-02  -.2454061E-02  -.2624412E-02  -.2627058E-02
  -.2551067E-02  -.2519852E-02  -.2551608E-02  -.2584204E-02  -.2584022E-02
  -.2563813E-02  -.2341040E-02  -.1389075E-02  -.8341861E-03  -.1067716E-02
  -.1167697E-02  -.4055413E-03  -.3827985E-03  -.3896699E-03  -.8690463E-03
  -.1340551E-02  -.1256955E-02  -.1015383E-02  -.9819345E-03  -.1091203E-02
  -.1157889E-02  -.1131896E-02  -.1093398E-02  -.1129147E-02  -.1133905E-02
  -.1141134E-02  -.9765986E-03  -.3018748E-03  -.6538514E-03  -.1184551E-02
  -.3299621E-03   .5307757E-03   .4331668E-03   .2118438E-04  -.2691523E-03
  -.1030189E-02  -.1266147E-02  -.3230804E-03  -.4899243E-03  -.1370061E-02
  -.1595672E-02  -.1285982E-02  -.1076423E-02  -.9490173E-03  -.1843820E-03
   .3233759E-03   .1507417E-03  -.9011892E-04  -.3861900E-04   .1363373E-03
   .2041449E-03   .1580961E-03   .1128068E-03   .1181784E-03   .1398274E-03
   .1508010E-03   .1480370E-03   .1239040E-03  -.1082376E-03  -.1068376E-02
  -.1632250E-02  -.1390417E-02  -.1111368E-02  -.1369739E-02  -.2427523E-02
  -.3136132E-02  -.2925285E-02  -.2557741E-02  -.2538480E-02  -.2764351E-02
  -.2917846E-02  -.2881499E-02  -.2797439E-02  -.2780371E-02  -.2813843E-02
  -.2836541E-02  -.2832811E-02  -.2821581E-02  -.2819564E-02  -.2823938E-02
  -.2827474E-02  -.2828117E-02  -.2825723E-02  -.2810472E-02  -.2761172E-02
  -.2765497E-02  -.2817421E-02  -.2826717E-02  -.2792048E-02  -.2725989E-02
  -.2697639E-02  -.2764376E-02  -.2784438E-02  -.2726328E-02  -.2695426E-02
  -.2710906E-02  -.2717541E-02  -.2566529E-02  -.1781522E-02  -.1108128E-02
  -.1201600E-02  -.1489390E-02  -.1357738E-02  -.4288769E-03   .4385443E-03
   .3737270E-03  -.8677833E-05  -.5852408E-04   .1462709E-03   .2758340E-03
   .2447138E-03   .1743796E-03   .1571731E-03   .1791441E-03   .1896680E-03
   .1815876E-03   .1783921E-03   .1820746E-03   .1826462E-03   .1806538E-03
   .1788801E-03   .1782730E-03   .1781520E-03   .1771682E-03   .1761115E-03
   .1750304E-03   .1742167E-03   .1733058E-03   .1735129E-03   .1774992E-03
   .1761387E-03   .1770019E-03   .1849983E-03   .1908681E-03   .1951704E-03
   .2028143E-03   .2126700E-03   .2207513E-03   .2215781E-03   .2200354E-03
   .2291497E-03   .2865675E-03   .7962271E-03   .1670866E-02   .1895129E-02
   .2070358E-02   .2374872E-02   .2320662E-02   .2878831E-02   .3277205E-02
   .3189591E-02   .3018312E-02   .2992550E-02   .2615432E-02   .2268631E-02
   .2986975E-02   .3488759E-02   .3264462E-02   .2945368E-02   .2992712E-02
   .3173082E-02   .3223549E-02   .3136736E-02   .3070097E-02   .3126724E-02
   .3147941E-02   .3085531E-02   .3081654E-02   .3123518E-02   .3091340E-02
   .3046282E-02   .3042935E-02   .3059492E-02   .3068090E-02   .3096009E-02
   .3151258E-02   .3159729E-02   .3089977E-02   .2537914E-02   .1602955E-02
   .1414717E-02   .1786199E-02   .1962103E-02   .1791267E-02   .1660119E-02
   .1682485E-02   .1748211E-02   .1809807E-02   .2322671E-02   .3236743E-02
   .3426561E-02   .3087228E-02   .2934924E-02   .3120756E-02   .3341489E-02
   .3320622E-02   .2767570E-02   .2307993E-02   .2520860E-02   .2174432E-02
   .1816327E-02   .1824044E-02   .1516361E-02   .1086887E-02   .1221758E-02
   .8220666E-03   .4655526E-03   .5066638E-03   .6385543E-03   .6262898E-03
   .5591184E-03   .5540377E-03   .5660247E-03   .9756227E-03   .1549324E-02
   .9695377E-03   .3315086E-03   .4635102E-03   .7877685E-03   .7757400E-03
   .6157787E-03   .5951578E-03   .6589223E-03   .6856973E-03   .6472870E-03
   .5922975E-03   .6259804E-03   .6656216E-03   .6289957E-03   .5579627E-03
   .5802466E-03   .6225596E-03   .5860111E-03   .1729206E-03  -.7951592E-03
  -.1175186E-02  -.8782770E-03  -.6575227E-03  -.7734970E-03  -.9641746E-03
  -.1062309E-02  -.1429961E-02  -.2331443E-02  -.2745253E-02  -.2508653E-02
  -.2292062E-02  -.2385065E-02  -.2562995E-02  -.2610878E-02  -.2555341E-02
  -.2507035E-02  -.2507801E-02  -.2529910E-02  -.2534352E-02  -.2522407E-02
  -.2513609E-02  -.2536081E-02  -.2604452E-02  -.2637936E-02  -.2624043E-02
  -.2607559E-02  -.2612465E-02  -.2624920E-02  -.2624950E-02  -.2616725E-02
  -.2614659E-02  -.2618384E-02  -.2621615E-02  -.2628597E-02  -.2665677E-02
  -.3032467E-02  -.3946922E-02  -.4340651E-02  -.4032383E-02  -.3779704E-02
  -.3883797E-02  -.4072119E-02  -.4110749E-02  -.4045239E-02  -.3999924E-02
  -.4007677E-02  -.4000920E-02  -.3744637E-02  -.2998334E-02  -.3163354E-02
  -.3019064E-02  -.2467700E-02  -.2307878E-02  -.2465523E-02  -.2552456E-02
  -.2472400E-02  -.2328183E-02  -.2282612E-02  -.2331365E-02  -.2369024E-02
  -.2355109E-02  -.2324450E-02  -.2299185E-02  -.2239496E-02  -.2208508E-02
  -.2225933E-02  -.2242751E-02  -.2237039E-02  -.2220731E-02  -.2206720E-02
  -.2189220E-02  -.2125423E-02  -.2067824E-02  -.1863879E-02  -.9805031E-03
  -.4522025E-03  -.6712872E-03  -.1073123E-02  -.1672437E-02  -.1183959E-02
  -.3789616E-03  -.5405197E-03  -.1805207E-02  -.2480410E-02  -.2117009E-02
  -.1518909E-02  -.8909398E-03  -.1500268E-02  -.2344831E-02  -.2317330E-02
  -.1691317E-02  -.6072659E-03  -.2178608E-03  -.6599919E-03  -.9779074E-03
  -.8227770E-03  -.4224472E-03   .3149008E-03   .1839695E-04  -.7692831E-03
  -.7063121E-03   .4147415E-03   .1229666E-02   .9648062E-03   .4882854E-03
   .3875715E-03  -.9062632E-04  -.6945225E-03  -.7152531E-03  -.3360190E-03
   .4697438E-03   .9988584E-03   .8080267E-03   .5237474E-03   .5648452E-03
   .7579136E-03   .8395741E-03   .8019525E-03   .7918546E-03   .7936899E-03
   .8203515E-03   .8585327E-03   .8601128E-03   .8351898E-03   .7881017E-03
   .9073601E-03   .1744267E-02   .2475905E-02   .2370913E-02   .2037479E-02
   .2022995E-02   .2222662E-02   .2474751E-02   .3104046E-02   .2927553E-02
   .2094959E-02   .1894431E-02   .2217208E-02   .2418575E-02   .2371986E-02
   .2254260E-02   .2320171E-02   .3055174E-02   .3907673E-02   .3849830E-02
   .2939065E-02   .2632499E-02   .3036498E-02   .3414700E-02   .3974753E-02
   .4027832E-02   .3776728E-02   .3697705E-02   .3824339E-02   .3972785E-02
   .4020202E-02   .3973199E-02   .3933773E-02   .3942377E-02   .3966316E-02
   .3976305E-02   .3977631E-02   .3985961E-02   .4034276E-02   .4096835E-02
   .4103737E-02   .4085935E-02   .4081414E-02   .4091440E-02   .4099260E-02
   .4098577E-02   .4094121E-02   .4089953E-02   .4086240E-02   .4113819E-02
   .4098779E-02   .3577509E-02   .2718553E-02   .2553358E-02   .2869920E-02
   .3001018E-02   .2858105E-02   .2714924E-02   .2713563E-02   .2775538E-02
   .2800874E-02   .2785017E-02   .2769811E-02   .2775883E-02   .2781508E-02
   .2735912E-02   .2226808E-02   .1349485E-02   .1167528E-02   .1483099E-02
   .1618503E-02   .1465013E-02   .1310552E-02   .1304752E-02   .1368145E-02
   .1396168E-02   .1378943E-02   .1359266E-02   .1355455E-02   .1356885E-02
   .1355728E-02   .1348540E-02   .1344650E-02   .1345300E-02   .1343966E-02
   .1336900E-02   .1336020E-02   .1343596E-02   .1347078E-02   .1343973E-02
   .1340900E-02   .1338989E-02   .1314509E-02   .1248525E-02   .9384295E-03
   .3886390E-03   .5705883E-03   .2682879E-03  -.1873805E-03  -.2203967E-03
  -.6492621E-04  -.3473479E-04  -.1224464E-03  -.2132140E-03  -.5545704E-03
  -.1092148E-02  -.5471026E-03  -.2505799E-03  -.1225763E-02  -.1945454E-02
  -.1810240E-02  -.1493114E-02  -.1489559E-02  -.1675992E-02  -.1781452E-02
  -.1755595E-02  -.1702145E-02  -.1708251E-02  -.1925854E-02  -.2634562E-02
  -.2470965E-02  -.2605899E-02  -.3084449E-02  -.3197225E-02  -.3039921E-02
  -.2783652E-02  -.2174733E-02  -.2614933E-02  -.3365681E-02  -.3383192E-02
  -.3040272E-02  -.2937474E-02  -.3118923E-02  -.3225485E-02  -.3217085E-02
  -.3139922E-02  -.3095026E-02  -.3129895E-02  -.3222943E-02  -.3260610E-02
  -.3213956E-02  -.3105219E-02  -.2853344E-02  -.1979438E-02  -.1473226E-02
  -.1684185E-02  -.1935457E-02  -.1869691E-02  -.1688124E-02  -.1626271E-02
  -.1677929E-02  -.1727156E-02  -.1725210E-02  -.1703811E-02  -.1696162E-02
  -.1704911E-02  -.1718898E-02  -.1724208E-02  -.1726291E-02  -.1728734E-02
  -.1735356E-02  -.1739646E-02  -.1739342E-02  -.1738199E-02  -.1737992E-02
  -.1733204E-02  -.1731060E-02  -.1732974E-02  -.1735398E-02  -.1734771E-02
  -.1732790E-02  -.1726131E-02  -.1722145E-02  -.1718773E-02  -.1718128E-02
  -.1721287E-02  -.1730778E-02  -.1740402E-02  -.1743616E-02  -.1747043E-02
  -.1756740E-02  -.1762700E-02  -.1762092E-02  -.1761922E-02  -.1770489E-02
  -.1783115E-02  -.1787526E-02  -.1785666E-02  -.1789275E-02  -.1795132E-02
  -.1788679E-02  -.1680917E-02  -.9231298E-03  -.1596920E-03  -.2049087E-03
  -.4976579E-03  -.5635205E-03  -.4865752E-03  -.9173933E-03  -.1081504E-02
  -.3320523E-03  -.1580122E-04  -.2386896E-03   .1222071E-03   .4037770E-03
  -.2180190E-03  -.5268814E-03   .2479426E-03   .1259922E-02   .1288454E-02
   .8384848E-03   .6288903E-03   .2674711E-03   .2701812E-03   .1024687E-02
   .1299817E-02   .1015282E-02   .7957476E-03   .8616471E-03   .1003957E-02
   .1044119E-02   .1001891E-02   .9706492E-03   .9797025E-03   .1001661E-02
   .1008746E-02   .9963023E-03   .9852441E-03   .9866783E-03   .9915997E-03
   .9918793E-03   .9892425E-03   .9866665E-03   .9866059E-03   .9867882E-03
   .9861625E-03   .9853971E-03   .9843522E-03   .9839329E-03   .9843158E-03
   .9881618E-03   .9928647E-03   .9918562E-03   .9887758E-03   .9931203E-03
   .9998282E-03   .9998586E-03   .9964622E-03   .9972523E-03   .1023859E-02
   .1087570E-02   .1112305E-02   .1092048E-02   .1076549E-02   .1083822E-02
   .1095415E-02   .1097973E-02   .1098180E-02   .1101333E-02   .1106692E-02
   .1115916E-02   .1120479E-02   .1118182E-02   .1112264E-02   .1080402E-02
   .7179500E-03  -.1671879E-03  -.4891440E-03   .1068416E-03   .8621438E-03
   .5880901E-03   .6625989E-03   .9834494E-03   .1054945E-02   .9804237E-03
   .9623540E-03   .1013489E-02   .1049306E-02   .1044336E-02   .1030751E-02
   .1031358E-02   .1036286E-02   .1039670E-02   .1054999E-02   .1267492E-02
   .2163506E-02   .2674326E-02   .2233066E-02   .1061215E-02   .7593585E-03
   .2096082E-02   .3010081E-02   .2673014E-02   .2140224E-02   .2124965E-02
   .2395331E-02   .2528250E-02   .2454750E-02   .2334246E-02   .2559553E-02
   .3543344E-02   .4094087E-02   .3831293E-02   .3385913E-02   .2643041E-02
   .2293197E-02   .3292693E-02   .4263516E-02   .4092534E-02   .3422662E-02
   .2516501E-02   .2046341E-02   .2309693E-02   .2593438E-02   .2514761E-02
   .2316190E-02   .2293434E-02   .2350356E-02   .2387450E-02   .2371379E-02
   .2361557E-02   .2355633E-02   .2377698E-02   .2420141E-02   .2425929E-02
   .2409053E-02   .2402254E-02   .2409253E-02   .2415833E-02   .2415724E-02
   .2412352E-02   .2411325E-02   .2412157E-02   .2416301E-02   .2422286E-02
   .2418197E-02   .2409350E-02   .2407680E-02   .2411319E-02   .2412923E-02
   .2412157E-02   .2414266E-02   .2417565E-02   .2422036E-02   .2465290E-02
   .2484435E-02   .2471445E-02   .2495968E-02   .2515587E-02   .2508454E-02
   .2494576E-02   .2494540E-02   .2501235E-02   .2501114E-02   .2497930E-02
   .2533280E-02   .2501247E-02   .1817781E-02   .9345264E-03   .8904273E-03
   .1210810E-02   .1247910E-02   .1108334E-02   .1050235E-02   .1072278E-02
   .1108224E-02   .1118407E-02   .1113619E-02   .1111067E-02   .1071792E-02
   .6139606E-03   .2073852E-03   .4384641E-03   .5240127E-03   .9305273E-03
   .6272422E-03  -.4075819E-03  -.7208679E-03  -.3530326E-03  -.1177614E-03
  -.2782627E-03  -.5313972E-03  -.5776348E-03  -.4861926E-03  -.3939969E-03
   .7998448E-04   .8729631E-03   .5842967E-03  -.1424304E-03  -.9342229E-04
  -.3313306E-03  -.5769674E-03  -.6008458E-03  -.5398681E-03  -.5418368E-03
  -.5938831E-03  -.6214557E-03  -.6094862E-03  -.5870177E-03  -.5788397E-03
  -.5822909E-03  -.6087334E-03  -.6416648E-03  -.6026819E-03  -.5890234E-03
  -.6602575E-03  -.7082573E-03  -.6981228E-03  -.6765414E-03  -.6760918E-03
  -.6946963E-03  -.7472409E-03  -.1181607E-02  -.2042624E-02  -.2324839E-02
  -.2050755E-02  -.1881699E-02  -.1992851E-02  -.2116751E-02  -.1791532E-02
  -.1171073E-02  -.1702363E-02  -.2347248E-02  -.1915470E-02  -.6454349E-03
  -.1882109E-03  -.6118233E-03  -.9318902E-03  -.8025465E-03  -.5324966E-03
  -.5824804E-04   .3985628E-03   .1592630E-04  -.1372475E-03  -.5135407E-03
  -.3810496E-03   .2199302E-03  -.2120303E-03  -.7543781E-03  -.3172411E-03
   .8413796E-03   .1172637E-02   .7626657E-03   .4841580E-03   .5617593E-03
   .7400020E-03   .7931781E-03   .7382153E-03   .6632627E-03   .5969015E-03
   .5606646E-03   .2271579E-03  -.6805584E-03  -.1113613E-02  -.8709292E-03
  -.6692577E-03  -.7930849E-03  -.9380320E-03  -.9792755E-03  -.9941738E-03
  -.9876972E-03  -.9773075E-03  -.9874363E-03  -.1024098E-02  -.1060645E-02
  -.1020173E-02  -.1005908E-02  -.1077574E-02  -.1124006E-02  -.1107844E-02
  -.1083248E-02  -.1083359E-02  -.1091701E-02  -.1099454E-02  -.1094624E-02
  -.1087145E-02  -.1086252E-02  -.1089168E-02  -.1090402E-02  -.1089399E-02
  -.1089595E-02  -.1095573E-02  -.1100811E-02  -.1099826E-02  -.1098533E-02
  -.1104093E-02  -.1110108E-02  -.1110023E-02  -.1108013E-02  -.1107636E-02
  -.1109829E-02  -.1115972E-02  -.1117492E-02  -.1080988E-02  -.6874762E-03
   .2667873E-03   .6464765E-03   .3611333E-03   .1447215E-03   .2330102E-03
   .3758909E-03   .4529028E-03   .4371174E-03   .3901260E-03   .3770686E-03
   .3946824E-03   .4084866E-03   .4015233E-03   .3902157E-03   .3840667E-03
   .3337518E-03  -.5610296E-04  -.6127717E-03  -.9292962E-04   .2182537E-03
  -.3819611E-03  -.1946776E-03   .3209843E-03   .4056942E-03   .1758121E-03
   .6303078E-04   .1605670E-03   .2846610E-03   .2514559E-03   .1904048E-03
   .2102059E-03   .2219199E-03   .2242832E-03  -.1377378E-03  -.1094547E-02
  -.1461600E-02  -.1109434E-02  -.8650314E-03  -.1021267E-02  -.1263381E-02
  -.1287143E-02  -.1213121E-02  -.1161391E-02  -.1189256E-02  -.1185616E-02
  -.1163774E-02  -.1163725E-02  -.1171661E-02  -.1172895E-02  -.1173083E-02
  -.1175854E-02  -.1176481E-02  -.1175721E-02  -.1175613E-02  -.1176515E-02
  -.1176992E-02  -.1177015E-02  -.1176604E-02  -.1176799E-02  -.1176502E-02
  -.1175226E-02  -.1154474E-02  -.1097203E-02  -.1071326E-02  -.1088211E-02
  -.1103104E-02  -.1102187E-02  -.1096455E-02  -.1090965E-02  -.1066018E-02
  -.1007338E-02  -.1012526E-02  -.1409933E-02  -.2352798E-02  -.2670712E-02
  -.2345002E-02  -.2139532E-02  -.2268267E-02  -.2444852E-02  -.2447236E-02
  -.2318389E-02  -.2253416E-02  -.2284829E-02  -.2321610E-02  -.2311415E-02
  -.2262344E-02  -.2222590E-02  -.2556802E-02  -.3145790E-02  -.2580233E-02
  -.1889140E-02  -.1945858E-02  -.2279502E-02  -.2354032E-02  -.2185684E-02
  -.2010140E-02  -.1680355E-02  -.8277323E-03  -.4566892E-03  -.7051061E-03
  -.9013037E-03  -.7958780E-03  -.6251667E-03  -.5566613E-03  -.2485768E-03
   .6046988E-03   .9687029E-03   .7200885E-03   .5311759E-03   .6381479E-03
   .8040895E-03   .8701616E-03   .1180616E-02   .2032600E-02   .2364295E-02
   .1756919E-02   .9432905E-03   .1224602E-02   .1504686E-02   .1999923E-02
   .1948104E-02   .1081324E-02   .1362008E-02   .1947948E-02   .1387318E-02
   .1161946E-02   .8259411E-03   .4617868E-03   .4737862E-03   .6194943E-03
   .6260987E-03   .5367293E-03   .4853639E-03   .5010299E-03   .5453328E-03
   .7494668E-03   .1439534E-02   .1262473E-02   .1214853E-02   .1023117E-02
   .1513294E-02   .2121405E-02   .2118141E-02   .1904408E-02   .1835786E-02
   .1953262E-02   .1863869E-02   .1105772E-02   .1216813E-02   .1044174E-02
   .5647144E-03   .5298153E-03   .7264463E-03   .7729782E-03   .6810401E-03
   .6157478E-03   .6264197E-03   .6568412E-03   .6673154E-03   .6643256E-03
   .6605094E-03   .6755376E-03   .7324440E-03   .7074198E-03   .6456669E-03
   .6378436E-03   .6619431E-03   .6672407E-03   .6558964E-03   .6483739E-03
   .6518488E-03   .6616274E-03   .6645039E-03   .6609306E-03   .6589128E-03
   .6595715E-03   .6577633E-03   .6507936E-03   .6382159E-03   .5852882E-03
   .5392444E-03   .5450006E-03   .5653484E-03   .5653022E-03   .5520258E-03
   .5318683E-03   .4829445E-03   .4826524E-03   .4851702E-03   .4520286E-03
   .4396301E-03   .4534036E-03   .4609827E-03   .4552859E-03   .4449107E-03
   .4282834E-03   .3824157E-03   .3884241E-03   .5370402E-03   .1274783E-02
   .1925520E-02   .1837929E-02   .1546644E-02   .1538386E-02   .1712830E-02
   .1808908E-02   .1781578E-02   .1731470E-02   .1712105E-02   .1675381E-02
   .1645956E-02   .1699156E-02   .1761353E-02   .1746972E-02   .1675804E-02
   .1672212E-02   .1695179E-02   .1715064E-02   .1701302E-02   .1690839E-02
   .1675034E-02   .1689786E-02   .1734547E-02   .1744644E-02   .1727473E-02
   .1719063E-02   .1724306E-02   .1727344E-02   .1721771E-02   .1713926E-02
   .1704047E-02   .1694993E-02   .1691504E-02   .1689960E-02   .1696497E-02
   .1750220E-02   .1799677E-02   .1805193E-02   .1844163E-02   .1896233E-02
   .1901495E-02   .1885514E-02   .1882147E-02   .1881892E-02   .1752219E-02
   .1135926E-02   .1142572E-02   .1128075E-02   .6097630E-03   .4066447E-03
   .5903794E-03   .7308293E-03   .6662417E-03   .5689901E-03   .6058944E-03
   .6963395E-03   .7185645E-03   .7063026E-03   .7495745E-03   .8001740E-03
   .7991646E-03   .7794535E-03   .7728544E-03   .7804484E-03   .7990401E-03
   .8544394E-03   .8967879E-03   .8828490E-03   .8582044E-03   .8577417E-03
   .8544357E-03   .7091964E-03   .3103941E-04  -.8065897E-05   .3608087E-04
  -.4106084E-03  -.6299860E-03  -.5354941E-03  -.4366156E-03  -.4350245E-03
  -.5069519E-03  -.5297737E-03  -.5085088E-03  -.4682385E-03  -.4364380E-03
  -.4645095E-03  -.6748339E-03  -.1436862E-02  -.2028000E-02  -.1770043E-02
  -.7277825E-03  -.7039455E-04  -.3274913E-03  -.6699544E-03  -.7542281E-03
  -.1360604E-02  -.1993921E-02  -.1944538E-02  -.1676942E-02  -.1662568E-02
  -.1826691E-02  -.1920699E-02  -.1877427E-02  -.1775693E-02  -.1877598E-02
  -.2723256E-02  -.3458988E-02  -.3349708E-02  -.3007587E-02  -.2932952E-02
  -.2930151E-02  -.2273152E-02  -.1602919E-02  -.1782014E-02  -.2823109E-02
  -.3509670E-02  -.3252714E-02  -.2857258E-02  -.2878306E-02  -.3116282E-02
  -.3227423E-02  -.3160759E-02  -.2935697E-02  -.2247061E-02  -.2228578E-02
  -.2233142E-02  -.1721728E-02  -.1488402E-02  -.1608207E-02  -.1711414E-02
  -.1668768E-02  -.1671108E-02  -.2295266E-02  -.3125614E-02  -.3177744E-02
  -.2848768E-02  -.2766006E-02  -.2934097E-02  -.3065164E-02  -.3051512E-02
  -.2989333E-02  -.2969192E-02  -.2994861E-02  -.3057006E-02  -.3108279E-02
  -.3091933E-02  -.3058796E-02  -.3058241E-02  -.3075840E-02  -.3080202E-02
  -.3068522E-02  -.3057646E-02  -.3047230E-02  -.2970870E-02  -.2416178E-02
  -.2251119E-02  -.3005123E-02  -.3349309E-02  -.2458132E-02  -.1421169E-02
  -.1514290E-02  -.2576131E-02  -.2864477E-02  -.1828497E-02  -.1284892E-02
  -.1572744E-02  -.1903353E-02  -.1882655E-02  -.1743179E-02  -.1684319E-02
  -.1719035E-02  -.1800731E-02  -.1820505E-02  -.1789621E-02  -.1768549E-02
  -.1767021E-02  -.1686330E-02  -.9996769E-03  -.1361936E-03  -.9625739E-04
  -.4430476E-03  -.5196757E-03  -.3359645E-03  -.1976657E-03  -.2141487E-03
  -.2859366E-03  -.3081726E-03  -.2839737E-03  -.2638568E-03  -.2673799E-03
  -.2296571E-03   .3095021E-03   .1248551E-02   .1446238E-02   .1109419E-02
   .9605323E-03   .1115478E-02   .1277996E-02   .1288961E-02   .1229595E-02
   .1205873E-02   .1268382E-02   .1745673E-02   .2112275E-02   .1415375E-02
   .9176510E-03   .1095016E-02   .1373004E-02   .1377164E-02   .1278530E-02
   .1704187E-02   .2595864E-02   .2818268E-02   .2509879E-02   .2352370E-02
   .2482659E-02   .2632997E-02   .2643730E-02   .2580068E-02   .2545448E-02
   .2554702E-02   .2568819E-02   .2561438E-02   .2545813E-02   .2538178E-02
   .2537791E-02   .2536444E-02   .2532491E-02   .2554001E-02   .2922341E-02
   .3847124E-02   .4209099E-02   .3914310E-02   .3688973E-02   .3755603E-02
   .3575846E-02   .3023393E-02   .3137250E-02   .2815700E-02   .2384682E-02
   .2364165E-02   .2506630E-02   .2521685E-02   .2432964E-02   .2393481E-02
   .2609585E-02   .3341099E-02   .2952995E-02   .2156414E-02   .2096289E-02
   .2447448E-02   .2772072E-02   .3344436E-02   .2831885E-02   .2045460E-02
   .2037844E-02   .2394795E-02   .2509393E-02   .2366207E-02   .2235261E-02
   .2232280E-02   .2281079E-02   .2293976E-02   .2270825E-02   .2250983E-02
   .2248336E-02   .2246724E-02   .2239508E-02   .2232830E-02   .2228328E-02
   .2213550E-02   .2076683E-02   .1467935E-02   .1416159E-02   .1400148E-02
   .9573924E-03   .7652637E-03   .8656444E-03   .9421974E-03   .8894924E-03
   .8013669E-03   .6314348E-03  -.1276394E-03  -.7887430E-03  -.6990948E-03
  -.4048322E-03  -.3966947E-03  -.5759729E-03  -.6761535E-03  -.6448040E-03
  -.5897753E-03  -.5817210E-03  -.6043472E-03  -.6185070E-03  -.6163469E-03
  -.6116296E-03  -.6209739E-03  -.7388955E-03  -.1313825E-02  -.1458673E-02
  -.1273940E-02  -.1694310E-02  -.1987325E-02  -.1913257E-02  -.1787663E-02
  -.1800599E-02  -.1874163E-02  -.1900931E-02  -.1876766E-02  -.1850881E-02
  -.1843977E-02  -.1846993E-02  -.1849631E-02  -.1844390E-02  -.1845534E-02
  -.1936932E-02  -.2625851E-02  -.3344995E-02  -.3299857E-02  -.2979641E-02
  -.2932805E-02  -.3096661E-02  -.3199733E-02  -.3169874E-02  -.3102009E-02
  -.3076647E-02  -.3085611E-02  -.3090456E-02  -.3077258E-02  -.3059107E-02
  -.3046420E-02  -.3037611E-02  -.3028953E-02  -.3028502E-02  -.3148189E-02
  -.3813534E-02  -.4382543E-02  -.4279129E-02  -.3995563E-02  -.3972662E-02
  -.4113575E-02  -.4174483E-02  -.4010522E-02  -.3395627E-02  -.3332249E-02
  -.3326448E-02  -.2923491E-02  -.2736330E-02  -.2815264E-02  -.2876666E-02
  -.2825559E-02  -.2755213E-02  -.2733768E-02  -.2746709E-02  -.2748198E-02
  -.2729687E-02  -.2707648E-02  -.2693769E-02  -.2693526E-02  -.2807516E-02
  -.3433109E-02  -.3849077E-02  -.3099023E-02  -.2272029E-02  -.2334375E-02
  -.2721327E-02  -.2790842E-02  -.2595909E-02  -.2452988E-02  -.2459626E-02
  -.2509481E-02  -.2511551E-02  -.2474617E-02  -.2443325E-02  -.2430536E-02
  -.2424072E-02  -.2412454E-02  -.2398988E-02  -.2383152E-02  -.2365401E-02
  -.2347259E-02  -.2327297E-02  -.2310111E-02  -.2297940E-02  -.2287340E-02
  -.2272083E-02  -.2255126E-02  -.2241393E-02  -.2217227E-02  -.2071201E-02
  -.1390925E-02  -.8042346E-03  -.8768573E-03  -.1128574E-02  -.1125959E-02
  -.9600574E-03  -.8653914E-03  -.8848581E-03  -.9242327E-03  -.9216403E-03
  -.8931091E-03  -.8718207E-03  -.8655928E-03  -.8620536E-03  -.8544357E-03
  -.8469081E-03  -.8357383E-03  -.8094606E-03  -.6803135E-03  -.7978558E-04
   .4352164E-03   .3647985E-03   .1414402E-03   .1420088E-03   .2829702E-03
   .3598585E-03   .3373981E-03   .3079463E-03   .4261182E-03   .1065680E-02
   .1600343E-02   .1404795E-02   .6584967E-03   .7383395E-03   .1491068E-02
   .1726428E-02   .1459459E-02   .1262729E-02   .1318090E-02   .1434741E-02
   .1456887E-02   .1410515E-02   .1376708E-02   .1378247E-02   .1388437E-02
   .1387549E-02   .1386151E-02   .1485668E-02   .2034750E-02   .2493522E-02
   .2271096E-02   .1555625E-02   .1808597E-02   .2462126E-02   .2551176E-02
   .2277015E-02   .2135170E-02   .2202892E-02   .2288614E-02   .2282664E-02
   .2229375E-02   .2195924E-02   .2192236E-02   .2191551E-02   .2179408E-02
   .2160702E-02   .2144500E-02   .2132820E-02   .2125049E-02   .2118646E-02
   .2106462E-02   .2089671E-02   .2073716E-02   .2060592E-02   .2048305E-02
   .2034645E-02   .2022278E-02   .2009533E-02   .1994321E-02   .1984848E-02
   .1976435E-02   .1962262E-02   .1945016E-02   .1929786E-02   .1915995E-02
   .1899923E-02   .1878748E-02   .1861671E-02   .1852109E-02   .1842705E-02
   .1830316E-02   .1814278E-02   .1797540E-02   .1783067E-02   .1769409E-02
   .1754871E-02   .1739035E-02   .1721570E-02   .1702591E-02   .1687751E-02
   .1676605E-02   .1665666E-02   .1649995E-02   .1632557E-02   .1614611E-02
   .1594228E-02   .1574295E-02   .1549669E-02   .1405647E-02   .8454426E-03
   .5151159E-03   .6439818E-03   .8004390E-03   .7573122E-03   .6404696E-03
   .5939320E-03   .6144979E-03   .6333495E-03   .6252828E-03   .6063669E-03
   .5946810E-03   .5899035E-03   .5860265E-03   .5787740E-03   .5702082E-03
   .5616044E-03   .5448268E-03   .4164441E-03  -.1876311E-04   .7428592E-04
  -.1761619E-04  -.3103373E-03  -.3748244E-03  -.2860050E-03  -.2477687E-03
  -.2862248E-03  -.3277667E-03  -.3284784E-03  -.3096606E-03  -.3088203E-03
  -.4306039E-03  -.9275528E-03  -.1208112E-02  -.1073803E-02  -.9179452E-03
  -.9415260E-03  -.1032952E-02  -.1059994E-02  -.1025822E-02  -.9901644E-03
  -.9803502E-03  -.9885454E-03  -.1067749E-02  -.1485312E-02  -.1836920E-02
  -.1764149E-02  -.1580198E-02  -.1557168E-02  -.1636802E-02  -.1671621E-02
  -.1633213E-02  -.1579945E-02  -.1555177E-02  -.1549276E-02  -.1537991E-02
  -.1516632E-02  -.1492272E-02  -.1469634E-02  -.1451765E-02  -.1435248E-02
  -.1417149E-02  -.1398923E-02  -.1382528E-02  -.1365118E-02  -.1345665E-02
  -.1326186E-02  -.1307828E-02  -.1287894E-02  -.1265047E-02  -.1241996E-02
  -.1223040E-02  -.1205975E-02  -.1187623E-02  -.1167842E-02  -.1148267E-02
  -.1129534E-02  -.1111044E-02  -.1092273E-02  -.1073508E-02  -.1054480E-02
  -.1035558E-02  -.1016888E-02  -.9979231E-03  -.9789478E-03  -.9604214E-03
  -.9417525E-03  -.9227070E-03  -.9039573E-03  -.8850773E-03  -.8651044E-03
  -.8435427E-03  -.8238722E-03  -.8062447E-03  -.7882640E-03  -.7692669E-03
  -.7484863E-03  -.7226833E-03  -.6470533E-03  -.3266807E-03  -.3731394E-05
  -.7481733E-05  -.1287172E-03  -.1346106E-03  -.5169779E-04   .1718432E-05
  -.5230064E-05  -.2205660E-04  -.1414781E-04   .3698645E-04   .2935684E-03
   .5978170E-03   .6062925E-03   .4846485E-03   .4629032E-03   .5296122E-03
   .5757962E-03   .5691615E-03   .5495596E-03   .5473015E-03   .5837540E-03
   .8005641E-03   .8875513E-03   .8320022E-03   .9894721E-03   .1084584E-02
   .1042590E-02   .9928927E-03   .9942968E-03   .1013586E-02   .1016065E-02
   .1027237E-02   .1221033E-02   .1468067E-02   .1462471E-02   .1338873E-02
   .1298015E-02   .1336515E-02   .1360646E-02   .1338384E-02   .1301335E-02
   .1277923E-02   .1265304E-02   .1252530E-02   .1235446E-02   .1215148E-02
   .1198152E-02   .1181570E-02   .1164704E-02   .1148239E-02   .1132238E-02
   .1116132E-02   .1099922E-02   .1085486E-02   .1092433E-02   .1237708E-02
   .1276260E-02   .1050963E-02   .9221503E-03   .9579283E-03   .1008765E-02
   .9894061E-03   .9372004E-03   .9256397E-03   .1068260E-02   .1126639E-02
   .1073283E-02   .1142780E-02   .1049822E-02   .9701399E-03   .1117295E-02
   .1191801E-02   .1125081E-02   .1048898E-02   .1032402E-02   .1040684E-02
   .1030253E-02   .1000050E-02   .9681664E-03   .9440937E-03   .9243355E-03
   .8960880E-03   .8616395E-03   .8234292E-03   .6943277E-03   .6294927E-03
   .6373559E-03   .5318316E-03   .4549106E-03   .4567553E-03   .4761044E-03
   .4540207E-03   .4119127E-03   .3914782E-03   .3892696E-03   .3845051E-03
   .3626051E-03   .3362010E-03   .3249548E-03   .3208362E-03   .3106526E-03
   .2963055E-03   .2850954E-03   .2764605E-03   .2670833E-03   .2573695E-03
   .2465525E-03   .2363732E-03   .2262909E-03   .2156336E-03   .2056046E-03
   .1952982E-03   .1799806E-03   .1706542E-03   .1685300E-03   .1624780E-03
   .1503027E-03   .1191681E-03   .2014804E-04   .8991736E-05   .3416274E-05
  -.6573987E-04  -.9669445E-04  -.8403199E-04  -.7498210E-04  -.8453596E-04
  -.9735040E-04  -.1018054E-03  -.1007741E-03  -.1000690E-03  -.9956301E-04
  -.1209742E-03  -.2139991E-03  -.2867014E-03  -.2705161E-03  -.2345243E-03
  -.2321355E-03  -.2458364E-03  -.2535730E-03  -.2471927E-03  -.2356271E-03
  -.2314618E-03  -.2326221E-03  -.2324000E-03  -.2285291E-03  -.2203965E-03
  -.2142113E-03  -.2137096E-03  -.2141984E-03  -.2123573E-03  -.2093147E-03
  -.2070430E-03  -.2050506E-03  -.2022241E-03  -.1995925E-03  -.1981878E-03
  -.1971060E-03  -.1964711E-03  -.2060605E-03  -.2614467E-03  -.2964422E-03
  -.2371690E-03  -.2185659E-03  -.2699700E-03  -.2928106E-03  -.2737123E-03
  -.2536428E-03  -.2502545E-03  -.2528848E-03  -.2507588E-03  -.2439011E-03
  -.2370868E-03  -.2328997E-03  -.2321701E-03  -.2308610E-03  -.2268058E-03
  -.2239813E-03  -.2214530E-03  -.2090296E-03  -.1638450E-03  -.1341693E-03
  -.1769663E-03  -.2218865E-03  -.2116316E-03  -.1836674E-03  -.1771482E-03
  -.1857636E-03  -.1883894E-03  -.1816727E-03  -.1749049E-03  -.1706000E-03
  -.1688019E-03  -.1657434E-03  -.1538834E-03  -.1245734E-03  -.1346756E-03
  -.1580002E-03  -.1558413E-03  -.1413726E-03  -.1354091E-03  -.1351836E-03
  -.1280769E-03  -.1032567E-03  -.1040789E-03  -.9723259E-04  -.8179455E-04
  -.7721096E-04  -.7948851E-04  -.7929153E-04  -.7592978E-04  -.7328506E-04
  -.7239694E-04  -.7150732E-04  -.6994472E-04  -.6793436E-04  -.6566660E-04
  -.6366824E-04  -.6227638E-04  -.6115970E-04  -.6008145E-04  -.5904953E-04
  -.5661708E-04  -.5443388E-04  -.5342855E-04  -.5249887E-04  -.5036023E-04
  -.4817548E-04  -.4709745E-04  -.4639882E-04  -.4541786E-04  -.4430677E-04
  -.4352688E-04  -.4222489E-04  -.4065716E-04  -.3961849E-04  -.3886587E-04
  -.3789267E-04  -.3656892E-04  -.3518663E-04  -.3405494E-04  -.3331814E-04
  -.3263785E-04  -.3179526E-04  -.3080804E-04  -.2948775E-04  -.2836321E-04
  -.2767374E-04  -.2597847E-04  -.1992011E-04  -.1892538E-04  -.1981572E-04
  -.2093760E-04  -.1856963E-04  -.1380642E-04  -.1291644E-04  -.1470210E-04
  -.1552334E-04  -.1482638E-04  -.1424427E-04  -.1428157E-04  -.1461879E-04
  -.1464215E-04  -.1447956E-04  -.1445584E-04  -.1450971E-04  -.1452374E-04
  -.1449294E-04  -.1441314E-04  -.1436408E-04  -.1430384E-04  -.1421800E-04
  -.1413210E-04  -.1402203E-04  -.1391451E-04  -.1378801E-04  -.1366090E-04
  -.1351342E-04  -.1340523E-04  -.1338911E-04  -.1327042E-04  -.1303482E-04
  -.1281029E-04  -.1270953E-04  -.1245202E-04  -.1212968E-04  -.1194595E-04
  -.1210046E-04  -.1306291E-04  -.1356133E-04  -.1263634E-04  -.1075687E-04
  -.9640304E-05  -.9798591E-05  -.1001243E-04  -.9736503E-05  -.9705514E-05
  -.9297204E-05  -.8352263E-05  -.7898343E-05  -.7863425E-05  -.7750444E-05
  -.7397755E-05  -.6973252E-05  -.6661358E-05  -.6422656E-05  -.6170270E-05
  -.5881733E-05  -.5578904E-05  -.5284449E-05  -.4951074E-05  -.4611348E-05
  -.4346860E-05  -.4123106E-05  -.3892384E-05  -.3668874E-05  -.3440624E-05
  -.3215212E-05  -.2992833E-05  -.2819053E-05  -.2547773E-05  -.2169014E-05
  -.1880552E-05  -.1694002E-05  -.1513933E-05  -.1297486E-05  -.1059581E-05
  -.8463075E-06  -.6704086E-06  -.4855912E-06  -.3046696E-06  -.1408866E-06
   .1162013E-07   .1618819E-06   .3086106E-06   .4486684E-06   .5825562E-06
   .7106271E-06   .8367690E-06   .9491868E-06   .1053490E-05   .1155274E-05
   .1248731E-05   .1334884E-05   .1413415E-05   .1483761E-05   .1545379E-05
   .1597931E-05   .1644570E-05   .1685268E-05   .1719582E-05   .1748048E-05
   .1768597E-05   .1781609E-05   .1788068E-05   .1787270E-05   .1778801E-05
   .1762734E-05
