# Supplementary material for: Earthquake Response Analysis of Tall Reinforced Concrete Chimneys considering Eccentricity
Source: Hindawi journal article supplement (doi:10.1155/2020/1417969), 2020-03-11
Supplement: f1 [file 1417969.f1.zip › 1417969.f1/Four kinds of earthquake records/Stiff soil/MORGAN G03090.txt]

PEER STRONG MOTION DATABASE RECORD. PROCESSING BY PACIFIC ENGINEERING.
MORGAN HILL 04/24/84 04:24, GILROY ARRAY #3, 090 (CDMG STATION 47381)
ACCELERATION TIME HISTORY IN UNITS OF G. FILTER POINTS: HP=0.1 Hz LP=32.0 Hz
NPTS=  7996, DT= .00500 SEC
   .7815019E-03   .8469694E-03   .8575224E-03   .8620527E-03   .8663677E-03
   .8691855E-03   .8711343E-03   .8705975E-03   .8675368E-03   .8677425E-03
   .8690014E-03   .8627605E-03   .8528700E-03   .8425871E-03   .8386185E-03
   .8391264E-03   .8382863E-03   .8332947E-03   .8242278E-03   .8158140E-03
   .8069780E-03   .7994769E-03   .7913913E-03   .7796676E-03   .7637077E-03
   .7454708E-03   .7276028E-03   .7093264E-03   .6906536E-03   .6689884E-03
   .6460000E-03   .6216159E-03   .5981567E-03   .5741782E-03   .5490634E-03
   .5233349E-03   .4963731E-03   .4729748E-03   .4799954E-03   .5291800E-03
   .5576669E-03   .5175599E-03   .4132062E-03   .3009265E-03   .2271712E-03
   .1471334E-03   .1694803E-04  -.1187664E-03  -.2034036E-03  -.2176090E-03
  -.1398251E-03   .2149641E-04   .2320996E-03   .4476638E-03   .6542873E-03
   .8363005E-03   .9417784E-03   .9702047E-03   .9241101E-03   .8192613E-03
   .6932563E-03   .4986209E-03   .2180602E-03  -.9612474E-04  -.3455678E-03
  -.5386507E-03  -.7826345E-03  -.1027502E-02  -.1187380E-02  -.1320178E-02
  -.1351202E-02  -.1216645E-02  -.8150539E-03  -.1496991E-03   .5796744E-03
   .1093875E-02   .1298850E-02   .1141016E-02   .6768266E-03  -.4578667E-04
  -.8537633E-03  -.1419728E-02  -.1589260E-02  -.1429779E-02  -.1062108E-02
  -.7309124E-03  -.6051194E-03  -.5153262E-03  -.2336740E-03   .1719054E-03
   .6213043E-03   .1106111E-02   .1466488E-02   .1591637E-02   .1514477E-02
   .1202892E-02   .6835247E-03   .7759643E-04  -.4622655E-03  -.7602091E-03
  -.8109029E-03  -.7679518E-03  -.7616048E-03  -.8229465E-03  -.9140269E-03
  -.9655529E-03  -.9578692E-03  -.9329969E-03  -.9369184E-03  -.1008471E-02
  -.1285651E-02  -.1849066E-02  -.2343041E-02  -.2118654E-02  -.1432722E-02
  -.9576003E-03  -.9180909E-03  -.1116595E-02  -.1281401E-02  -.1289064E-02
  -.1036157E-02  -.3293727E-03   .6450076E-03   .1699018E-02   .2619923E-02
   .3762070E-02   .5389706E-02   .7057693E-02   .7771175E-02   .7030210E-02
   .4868126E-02   .1877718E-02  -.8410003E-03  -.2566326E-02  -.3138626E-02
  -.2614652E-02  -.1572782E-02  -.4572808E-03   .2747604E-03   .3538727E-03
  -.2151653E-03  -.1142296E-02  -.1807911E-02  -.1924853E-02  -.1732953E-02
  -.1590752E-02  -.1757604E-02  -.2450466E-02  -.3576816E-02  -.4852476E-02
  -.5913270E-02  -.6083203E-02  -.4991346E-02  -.3183986E-02  -.1281775E-02
   .3623228E-03   .1718282E-02   .2470620E-02   .2657012E-02   .2659858E-02
   .3162110E-02   .4813547E-02   .6919650E-02   .8533826E-02   .9129017E-02
   .8228341E-02   .6088677E-02   .3027284E-02  -.2747605E-03  -.3291644E-02
  -.5574343E-02  -.6280867E-02  -.5406361E-02  -.3621518E-02  -.1758477E-02
  -.4416053E-03   .9477701E-04  -.2964615E-03  -.1669719E-02  -.3612787E-02
  -.5953840E-02  -.8669773E-02  -.1140444E-01  -.1366420E-01  -.1488508E-01
  -.1499524E-01  -.1401570E-01  -.1268549E-01  -.1111814E-01  -.8662477E-02
  -.5229433E-02  -.1496440E-02   .2542341E-02   .7163115E-02   .1213631E-01
   .1643771E-01   .1872681E-01   .1880074E-01   .1702700E-01   .1405177E-01
   .1069533E-01   .7110326E-02   .3487682E-02  -.3704413E-03  -.4186622E-02
  -.7278422E-02  -.9464500E-02  -.1109356E-01  -.1200619E-01  -.1187647E-01
  -.1035496E-01  -.7661434E-02  -.4324858E-02  -.1016227E-02   .1731572E-02
   .3061912E-02   .2616246E-02   .3889235E-03  -.3088845E-02  -.6965341E-02
  -.1048715E-01  -.1321820E-01  -.1469374E-01  -.1421290E-01  -.1156867E-01
  -.7157120E-02  -.1942505E-02   .3284225E-02   .8216907E-02   .1235111E-01
   .1496837E-01   .1530114E-01   .1284648E-01   .8180570E-02   .2464728E-02
  -.2901322E-02  -.5931369E-02  -.6151646E-02  -.5637935E-02  -.6492816E-02
  -.8288910E-02  -.9438402E-02  -.8634057E-02  -.5495893E-02  -.3970232E-03
   .5047881E-02   .9215023E-02   .1066871E-01   .9010634E-02   .4712171E-02
  -.4316626E-03  -.4824921E-02  -.8473244E-02  -.1261522E-01  -.1708123E-01
  -.1917868E-01  -.1455126E-01  -.1725699E-02   .1579157E-01   .3183034E-01
   .4025830E-01   .3784560E-01   .2603489E-01   .8106074E-02  -.1142508E-01
  -.2727848E-01  -.3584098E-01  -.3512711E-01  -.2638673E-01  -.1455321E-01
  -.4767060E-02  -.9892462E-04  -.5328850E-03  -.3021704E-02  -.5375372E-02
  -.8227665E-02  -.1228490E-01  -.1489060E-01  -.1202839E-01  -.2090152E-02
   .1166826E-01   .2338211E-01   .2842025E-01   .2584838E-01   .1922965E-01
   .1351011E-01   .1244139E-01   .1713597E-01   .2505747E-01   .3208863E-01
   .3463840E-01   .2888449E-01   .1210639E-01  -.1293285E-01  -.3695752E-01
  -.4805794E-01  -.4145211E-01  -.2414777E-01  -.7798153E-02   .1286137E-03
  -.3046841E-03  -.4362455E-02  -.7699537E-02  -.8563631E-02  -.7657749E-02
  -.6505605E-02  -.5308148E-02  -.3155619E-02   .9301052E-03   .6843949E-02
   .1337082E-01   .1891124E-01   .2182266E-01   .2128272E-01   .1840141E-01
   .1526698E-01   .1387202E-01   .1452946E-01   .1568763E-01   .1407902E-01
   .7984964E-02  -.1118558E-02  -.9981686E-02  -.1566313E-01  -.1667291E-01
  -.1373978E-01  -.8916001E-02  -.3611572E-02   .1598860E-02   .7254040E-02
   .1380828E-01   .2025779E-01   .2460135E-01   .2564880E-01   .2307897E-01
   .1695801E-01   .8122896E-02  -.1865513E-02  -.1061318E-01  -.1620013E-01
  -.1738630E-01  -.1544532E-01  -.1365245E-01  -.1531714E-01  -.2129320E-01
  -.2939112E-01  -.3656972E-01  -.3938269E-01  -.3587854E-01  -.2722334E-01
  -.1689362E-01  -.7764919E-02  -.1043745E-02   .3647043E-02   .8082120E-02
   .1381665E-01   .2104657E-01   .2954499E-01   .3933958E-01   .4932402E-01
   .5782258E-01   .6303561E-01   .6330003E-01   .5849042E-01   .5042811E-01
   .3957465E-01   .2478030E-01   .4626367E-02  -.2087556E-01  -.4919605E-01
  -.7689956E-01  -.9923184E-01  -.1103938E+00  -.1066920E+00  -.9050157E-01
  -.6724794E-01  -.4433412E-01  -.2642677E-01  -.1424695E-01  -.6960412E-02
  -.4140080E-02  -.4207018E-02  -.4676813E-02  -.2904963E-02   .2685886E-02
   .1165888E-01   .2171143E-01   .3021528E-01   .3439738E-01   .3296227E-01
   .2783853E-01   .2231701E-01   .1833460E-01   .1641864E-01   .1707407E-01
   .2035740E-01   .2516918E-01   .2978113E-01   .3233492E-01   .3133573E-01
   .2569776E-01   .1520446E-01   .1246385E-02  -.1343341E-01  -.2641630E-01
  -.3621391E-01  -.4207250E-01  -.4401815E-01  -.4252998E-01  -.3913895E-01
  -.3655094E-01  -.3673259E-01  -.3922829E-01  -.4151199E-01  -.4071523E-01
  -.3604215E-01  -.2822410E-01  -.1823453E-01  -.8139639E-02   .4431817E-03
   .7217278E-02   .1217346E-01   .1562759E-01   .1813445E-01   .1949992E-01
   .1893782E-01   .1645767E-01   .1326021E-01   .1025849E-01   .8499655E-02
   .9248735E-02   .1222070E-01   .1644376E-01   .2090362E-01   .2453494E-01
   .2609007E-01   .2470552E-01   .2136061E-01   .1780842E-01   .1560620E-01
   .1575927E-01   .1765061E-01   .1970729E-01   .2043715E-01   .1914731E-01
   .1552907E-01   .9679198E-02   .2079379E-02  -.6433292E-02  -.1555967E-01
  -.2446761E-01  -.3201325E-01  -.3794161E-01  -.4263799E-01  -.4604212E-01
  -.4739810E-01  -.4528398E-01  -.3899025E-01  -.2892778E-01  -.1637418E-01
  -.2967675E-02   .1098372E-01   .2550972E-01   .4090291E-01   .5679210E-01
   .7116519E-01   .8147940E-01   .8543355E-01   .8179553E-01   .7122269E-01
   .5578628E-01   .3868535E-01   .2235636E-01   .8026803E-02  -.4205461E-02
  -.1514496E-01  -.2544459E-01  -.3451973E-01  -.4106330E-01  -.4386812E-01
  -.4262671E-01  -.3801080E-01  -.3120147E-01  -.2343036E-01  -.1557814E-01
  -.8614632E-02  -.3075881E-02   .8861878E-03   .3505493E-02   .5525515E-02
   .6550272E-02   .5263474E-02   .1532474E-02  -.2900604E-02  -.4344250E-02
  -.6121365E-03   .7508836E-02   .1671460E-01   .2348585E-01   .2675660E-01
   .2797191E-01   .2881751E-01   .2950536E-01   .2891578E-01   .2571791E-01
   .1885259E-01   .9297440E-02  -.8235064E-03  -.9244245E-02  -.1502066E-01
  -.1855948E-01  -.2125724E-01  -.2458249E-01  -.2886367E-01  -.3343828E-01
  -.3700352E-01  -.3730690E-01  -.3287430E-01  -.2392909E-01  -.1189325E-01
   .1105686E-02   .1225521E-01   .1983076E-01   .2331365E-01   .2268259E-01
   .1930726E-01   .1498076E-01   .1099254E-01   .7675764E-02   .5153742E-02
   .3765554E-02   .3343586E-02   .3292630E-02   .3202769E-02   .3132210E-02
   .3436034E-02   .4015850E-02   .4765770E-02   .5612504E-02   .7042511E-02
   .9254820E-02   .1162902E-01   .1264845E-01   .1072936E-01   .5463134E-02
  -.2596336E-02  -.1320448E-01  -.2548810E-01  -.3793059E-01  -.4937239E-01
  -.5867303E-01  -.6477752E-01  -.6622764E-01  -.6167641E-01  -.5077130E-01
  -.3460407E-01  -.1486960E-01   .7127262E-02   .2996348E-01   .5071331E-01
   .6669785E-01   .7685709E-01   .8156102E-01   .8242837E-01   .8059549E-01
   .7630601E-01   .6910790E-01   .5747935E-01   .4061580E-01   .1870939E-01
  -.6094969E-02  -.3020500E-01  -.5155353E-01  -.6874798E-01  -.8130085E-01
  -.8939557E-01  -.9275175E-01  -.9110857E-01  -.8481126E-01  -.7419202E-01
  -.6069192E-01  -.4640492E-01  -.3318927E-01  -.2247512E-01  -.1456929E-01
  -.8567909E-02  -.3127935E-02   .2692049E-02   .9342538E-02   .1662731E-01
   .2324717E-01   .2771340E-01   .2875601E-01   .2643083E-01   .2221952E-01
   .1734649E-01   .1241671E-01   .8310251E-02   .5305661E-02   .3834800E-02
   .4120801E-02   .5702306E-02   .7391623E-02   .8136306E-02   .7648260E-02
   .5994539E-02   .3888748E-02   .1889016E-02   .5577564E-03   .1852746E-03
   .9361065E-03   .3279895E-02   .6921108E-02   .1098749E-01   .1468547E-01
   .1740709E-01   .1871328E-01   .1846453E-01   .1729850E-01   .1616751E-01
   .1575853E-01   .1597157E-01   .1634339E-01   .1691275E-01   .1831222E-01
   .2065395E-01   .2385798E-01   .2817801E-01   .3370985E-01   .4032604E-01
   .4688067E-01   .5148089E-01   .5252404E-01   .4923135E-01   .4175621E-01
   .3093603E-01   .1697787E-01   .3378773E-03  -.1749166E-01  -.3428065E-01
  -.4787229E-01  -.5756011E-01  -.6354135E-01  -.6620094E-01  -.6583809E-01
  -.6252828E-01  -.5662436E-01  -.4846266E-01  -.3831113E-01  -.2641102E-01
  -.1363637E-01  -.1321390E-02   .9369333E-02   .1709315E-01   .2070177E-01
   .2043232E-01   .1746617E-01   .1243311E-01   .5009749E-02  -.5076492E-02
  -.1727383E-01  -.3018960E-01  -.4197224E-01  -.5159975E-01  -.5870345E-01
  -.6327339E-01  -.6467221E-01  -.6220252E-01  -.5608399E-01  -.4678825E-01
  -.3481171E-01  -.2162366E-01  -.8902119E-02   .2094492E-02   .1090222E-01
   .1816856E-01   .2451904E-01   .2994522E-01   .3376035E-01   .3512421E-01
   .3361846E-01   .2940911E-01   .2359092E-01   .1714030E-01   .1039914E-01
   .2995866E-02  -.5831361E-02  -.1601580E-01  -.2640293E-01  -.3546439E-01
  -.4252324E-01  -.4728161E-01  -.5006262E-01  -.5160454E-01  -.5238639E-01
  -.5255414E-01  -.5104689E-01  -.4637043E-01  -.3825818E-01  -.2721258E-01
  -.1425379E-01  -.9692931E-04   .1453618E-01   .2902950E-01   .4319666E-01
   .5797783E-01   .7334730E-01   .8798051E-01   .1003218E+00   .1102322E+00
   .1186601E+00   .1262908E+00   .1322541E+00   .1349367E+00   .1336949E+00
   .1293725E+00   .1225717E+00   .1139847E+00   .1043325E+00   .9433222E-01
   .8492234E-01   .7694598E-01   .7028981E-01   .6433948E-01   .5832521E-01
   .5195707E-01   .4482492E-01   .3648810E-01   .2585963E-01   .1176994E-01
  -.5432947E-02  -.2478447E-01  -.4444290E-01  -.6193840E-01  -.7559287E-01
  -.8501627E-01  -.9075709E-01  -.9358452E-01  -.9392010E-01  -.9202612E-01
  -.8741453E-01  -.7922505E-01  -.6694360E-01  -.5022361E-01  -.3023030E-01
  -.8330456E-02   .1415963E-01   .3554427E-01   .5381249E-01   .6678970E-01
   .7354123E-01   .7417175E-01   .6945204E-01   .5998981E-01   .4568658E-01
   .2716260E-01   .6166547E-02  -.1581682E-01  -.3814126E-01  -.6040080E-01
  -.8128037E-01  -.9942112E-01  -.1140835E+00  -.1250447E+00  -.1315732E+00
  -.1324204E+00  -.1268729E+00  -.1160786E+00  -.1027132E+00  -.8958131E-01
  -.7787549E-01  -.6750193E-01  -.5849189E-01  -.5081530E-01  -.4413770E-01
  -.3837453E-01  -.3327646E-01  -.2820819E-01  -.2286236E-01  -.1733849E-01
  -.1158865E-01  -.5379753E-02   .1396482E-02   .8341873E-02   .1460472E-01
   .2010229E-01   .2573956E-01   .3207741E-01   .3839626E-01   .4414036E-01
   .4939354E-01   .5429850E-01   .5805169E-01   .5920364E-01   .5743803E-01
   .5316401E-01   .4659751E-01   .3866838E-01   .3090556E-01   .2410770E-01
   .1825541E-01   .1297319E-01   .7924858E-02   .2422538E-02  -.4637827E-02
  -.1365430E-01  -.2330861E-01  -.3134454E-01  -.3640286E-01  -.3862800E-01
  -.3853089E-01  -.3648638E-01  -.3310827E-01  -.2861879E-01  -.2288402E-01
  -.1576505E-01  -.7734451E-02   .1230862E-02   .1143678E-01   .2251179E-01
   .3341100E-01   .4288821E-01   .5021422E-01   .5511733E-01   .5727916E-01
   .5629019E-01   .5250826E-01   .4700447E-01   .4120116E-01   .3593645E-01
   .3113832E-01   .2670068E-01   .2275917E-01   .2019714E-01   .1949193E-01
   .2059956E-01   .2291402E-01   .2542034E-01   .2707270E-01   .2830747E-01
   .3011741E-01   .3270508E-01   .3549924E-01   .3735110E-01   .3784176E-01
   .3757048E-01   .3730951E-01   .3737152E-01   .3761801E-01   .3766404E-01
   .3668947E-01   .3422342E-01   .2977955E-01   .2340806E-01   .1509018E-01
   .5367080E-02  -.3956183E-02  -.1084300E-01  -.1513926E-01  -.1805200E-01
  -.2083239E-01  -.2440420E-01  -.2910681E-01  -.3431299E-01  -.3984468E-01
  -.4582309E-01  -.5192642E-01  -.5842676E-01  -.6541862E-01  -.7279242E-01
  -.8018722E-01  -.8738037E-01  -.9355084E-01  -.9810208E-01  -.1007054E+00
  -.1006649E+00  -.9763565E-01  -.9231202E-01  -.8618612E-01  -.7972616E-01
  -.7277216E-01  -.6574385E-01  -.5927879E-01  -.5310140E-01  -.4618702E-01
  -.3771069E-01  -.2689841E-01  -.1228726E-01   .6997567E-02   .3007201E-01
   .5451387E-01   .7895700E-01   .1007663E+00   .1187641E+00   .1345454E+00
   .1496020E+00   .1648448E+00   .1795783E+00   .1918060E+00   .1991769E+00
   .2003965E+00   .1954752E+00   .1854139E+00   .1717041E+00   .1566802E+00
   .1420771E+00   .1291013E+00   .1179880E+00   .1081083E+00   .9831771E-01
   .8727804E-01   .7455186E-01   .6089303E-01   .4753400E-01   .3572477E-01
   .2601227E-01   .1826252E-01   .1195854E-01   .7039095E-02   .3076825E-02
  -.2949661E-03  -.3022029E-02  -.4314013E-02  -.3463973E-02  -.8364609E-03
   .2890157E-02   .7348801E-02   .1227796E-01   .1728100E-01   .2173109E-01
   .2517385E-01   .2754549E-01   .2835432E-01   .2682085E-01   .2310317E-01
   .1787011E-01   .1251437E-01   .8617035E-02   .6736125E-02   .6354264E-02
   .6467809E-02   .6372536E-02   .5864297E-02   .4882621E-02   .3708074E-02
   .2988879E-02   .3187193E-02   .4672434E-02   .7141874E-02   .9767249E-02
   .1147627E-01   .1131568E-01   .8913114E-02   .4181293E-02  -.2501624E-02
  -.1101684E-01  -.2063252E-01  -.2971391E-01  -.3726846E-01  -.4356504E-01
  -.4920718E-01  -.5455631E-01  -.5936591E-01  -.6319558E-01  -.6602296E-01
  -.6811269E-01  -.6990553E-01  -.7116757E-01  -.7169252E-01  -.7174113E-01
  -.7169408E-01  -.7188715E-01  -.7275325E-01  -.7448677E-01  -.7660858E-01
  -.7884861E-01  -.8111731E-01  -.8307735E-01  -.8434103E-01  -.8424489E-01
  -.8223363E-01  -.7902010E-01  -.7553380E-01  -.7253035E-01  -.7025457E-01
  -.6862884E-01  -.6710724E-01  -.6501032E-01  -.6206337E-01  -.5814989E-01
  -.5331082E-01  -.4777968E-01  -.4129205E-01  -.3351779E-01  -.2479794E-01
  -.1573718E-01  -.7617728E-02  -.1153385E-02   .3420349E-02   .6132467E-02
   .6866636E-02   .5690939E-02   .3358627E-02   .7620380E-03  -.1491992E-02
  -.3136523E-02  -.4767055E-02  -.7329358E-02  -.1109993E-01  -.1623475E-01
  -.2177480E-01  -.2637921E-01  -.2948888E-01  -.3115656E-01  -.3101763E-01
  -.2881912E-01  -.2451028E-01  -.1810660E-01  -.9641513E-02  -.4271348E-03
   .7834795E-02   .1455560E-01   .1894853E-01   .2027421E-01   .1854431E-01
   .1388203E-01   .6735494E-02  -.2155761E-02  -.1202294E-01  -.2195915E-01
  -.3083795E-01  -.3765022E-01  -.4236030E-01  -.4553880E-01  -.4708002E-01
  -.4637725E-01  -.4296179E-01  -.3698495E-01  -.2910543E-01  -.2001748E-01
  -.1072168E-01  -.2730359E-02   .3057256E-02   .6806574E-02   .8479246E-02
   .7768167E-02   .5274516E-02   .2117522E-02  -.4874397E-03  -.2211005E-02
  -.3114471E-02  -.2848251E-02  -.1460078E-02   .7550496E-03   .3360736E-02
   .6295690E-02   .1000520E-01   .1465220E-01   .1953747E-01   .2446186E-01
   .3003684E-01   .3583058E-01   .4111383E-01   .4520272E-01   .4748213E-01
   .4713478E-01   .4448968E-01   .4050119E-01   .3548256E-01   .2949081E-01
   .2235204E-01   .1431662E-01   .6485865E-02  -.4080244E-04  -.4471087E-02
  -.5814430E-02  -.3500532E-02   .2098663E-02   .1026821E-01   .2003652E-01
   .3027380E-01   .3985163E-01   .4849547E-01   .5630807E-01   .6304134E-01
   .6840730E-01   .7207585E-01   .7415194E-01   .7509005E-01   .7509496E-01
   .7437188E-01   .7348004E-01   .7237407E-01   .7066883E-01   .6887123E-01
   .6720458E-01   .6520605E-01   .6271152E-01   .5995773E-01   .5714318E-01
   .5396610E-01   .4952174E-01   .4313952E-01   .3485645E-01   .2473185E-01
   .1241400E-01  -.2687018E-02  -.2059490E-01  -.4036416E-01  -.6119848E-01
  -.8095055E-01  -.9712276E-01  -.1089292E+00  -.1170377E+00  -.1222229E+00
  -.1250025E+00  -.1253039E+00  -.1228988E+00  -.1175482E+00  -.1091857E+00
  -.9850128E-01  -.8633545E-01  -.7313302E-01  -.5918528E-01  -.4513146E-01
  -.3160935E-01  -.1931722E-01  -.9275138E-02  -.1743622E-02   .3424312E-02
   .5807585E-02   .5238551E-02   .1812752E-02  -.4189011E-02  -.1209120E-01
  -.2113195E-01  -.2992258E-01  -.3730444E-01  -.4318118E-01  -.4751922E-01
  -.4984398E-01  -.4946485E-01  -.4646284E-01  -.4125387E-01  -.3427396E-01
  -.2596922E-01  -.1598039E-01  -.4324220E-02   .8224957E-02   .2050110E-01
   .3156304E-01   .4069761E-01   .4726049E-01   .5118867E-01   .5202295E-01
   .4944285E-01   .4419145E-01   .3696990E-01   .2785189E-01   .1736472E-01
   .6694588E-02  -.2742049E-02  -.1041429E-01  -.1610532E-01  -.1952054E-01
  -.2101426E-01  -.2144025E-01  -.2163193E-01  -.2193208E-01  -.2226811E-01
  -.2246934E-01  -.2248643E-01  -.2239509E-01  -.2231839E-01  -.2235818E-01
  -.2280896E-01  -.2383490E-01  -.2521989E-01  -.2658901E-01  -.2750268E-01
  -.2765181E-01  -.2673031E-01  -.2468283E-01  -.2204010E-01  -.1937172E-01
  -.1699579E-01  -.1548722E-01  -.1553325E-01  -.1673254E-01  -.1817457E-01
  -.1944205E-01  -.2020932E-01  -.2033327E-01  -.1908285E-01  -.1600937E-01
  -.1113042E-01  -.4688157E-02   .2490403E-02   .9683741E-02   .1615794E-01
   .2145573E-01   .2572588E-01   .2937220E-01   .3254066E-01   .3510324E-01
   .3643702E-01   .3604388E-01   .3352433E-01   .2848720E-01   .2132706E-01
   .1251592E-01   .2900486E-02  -.6307868E-02  -.1422195E-01  -.2039814E-01
  -.2453087E-01  -.2705315E-01  -.2875436E-01  -.2977881E-01  -.3024500E-01
  -.3046816E-01  -.3117224E-01  -.3327314E-01  -.3682327E-01  -.4132075E-01
  -.4656115E-01  -.5228786E-01  -.5809546E-01  -.6355260E-01  -.6766215E-01
  -.6976615E-01  -.7068931E-01  -.7161275E-01  -.7250986E-01  -.7301779E-01
  -.7256721E-01  -.7047135E-01  -.6676399E-01  -.6136412E-01  -.5380394E-01
  -.4455962E-01  -.3410342E-01  -.2191817E-01  -.8331081E-02   .4448739E-02
   .1496910E-01   .2331458E-01   .2971984E-01   .3438244E-01   .3781858E-01
   .4078246E-01   .4372455E-01   .4669718E-01   .4959700E-01   .5260792E-01
   .5592828E-01   .5932320E-01   .6265990E-01   .6583657E-01   .6812452E-01
   .6900945E-01   .6841947E-01   .6685606E-01   .6443882E-01   .6105828E-01
   .5721559E-01   .5302540E-01   .4857142E-01   .4349366E-01   .3709281E-01
   .2878476E-01   .1897100E-01   .8906874E-02  -.7660686E-03  -.9897041E-02
  -.1788160E-01  -.2464812E-01  -.3082533E-01  -.3708823E-01  -.4274805E-01
  -.4720380E-01  -.5042748E-01  -.5259979E-01  -.5347267E-01  -.5300070E-01
  -.5155473E-01  -.4944974E-01  -.4701666E-01  -.4448334E-01  -.4193710E-01
  -.3937326E-01  -.3674565E-01  -.3404688E-01  -.3131390E-01  -.2857089E-01
  -.2567138E-01  -.2244667E-01  -.1907634E-01  -.1569522E-01  -.1260886E-01
  -.9865562E-02  -.7281699E-02  -.4693752E-02  -.2215852E-02  -.2046797E-03
   .1526321E-02   .3746699E-02   .7023897E-02   .1112071E-01   .1557089E-01
   .2014950E-01   .2470439E-01   .2966943E-01   .3531487E-01   .4093892E-01
   .4558422E-01   .4907937E-01   .5193709E-01   .5432818E-01   .5632273E-01
   .5750679E-01   .5786357E-01   .5779678E-01   .5753673E-01   .5690003E-01
   .5603039E-01   .5541897E-01   .5489114E-01   .5390261E-01   .5259041E-01
   .5108052E-01   .4970198E-01   .4840350E-01   .4761284E-01   .4779759E-01
   .4899553E-01   .5046645E-01   .5184982E-01   .5260078E-01   .5263336E-01
   .5198364E-01   .5018925E-01   .4721504E-01   .4337962E-01   .3852051E-01
   .3307949E-01   .2762839E-01   .2238729E-01   .1742906E-01   .1299124E-01
   .9547947E-02   .7879916E-02   .8296335E-02   .1138952E-01   .1737714E-01
   .2516426E-01   .3347790E-01   .4194643E-01   .5044919E-01   .5830690E-01
   .6443127E-01   .6814305E-01   .6922744E-01   .6749556E-01   .6373608E-01
   .5897636E-01   .5397905E-01   .4901606E-01   .4403080E-01   .3904719E-01
   .3425598E-01   .2978138E-01   .2625648E-01   .2390311E-01   .2249583E-01
   .2252140E-01   .2398788E-01   .2624238E-01   .2900911E-01   .3182289E-01
   .3421932E-01   .3572332E-01   .3566509E-01   .3364089E-01   .3057728E-01
   .2723980E-01   .2346866E-01   .1925052E-01   .1449129E-01   .9282921E-02
   .3902680E-02  -.1276131E-02  -.6008922E-02  -.1031747E-01  -.1373379E-01
  -.1613460E-01  -.1823326E-01  -.2030422E-01  -.2204913E-01  -.2357967E-01
  -.2477852E-01  -.2602102E-01  -.2731387E-01  -.2912615E-01  -.3192787E-01
  -.3547814E-01  -.3965613E-01  -.4429414E-01  -.4954625E-01  -.5529406E-01
  -.6141584E-01  -.6769445E-01  -.7326717E-01  -.7698961E-01  -.7876864E-01
  -.7853810E-01  -.7694255E-01  -.7463585E-01  -.7170119E-01  -.6821882E-01
  -.6453167E-01  -.6119545E-01  -.5838646E-01  -.5583395E-01  -.5322339E-01
  -.5048208E-01  -.4770085E-01  -.4498006E-01  -.4257675E-01  -.4091058E-01
  -.3963895E-01  -.3860796E-01  -.3758095E-01  -.3644747E-01  -.3520048E-01
  -.3287370E-01  -.2852289E-01  -.2180960E-01  -.1311116E-01  -.3159361E-02
   .7253332E-02   .1752847E-01   .2726331E-01   .3625266E-01   .4387749E-01
   .4946771E-01   .5302484E-01   .5512523E-01   .5621493E-01   .5596517E-01
   .5455203E-01   .5200098E-01   .4777600E-01   .4220430E-01   .3579194E-01
   .2868570E-01   .2120024E-01   .1407835E-01   .7924326E-02   .2740193E-02
  -.1463265E-02  -.4347765E-02  -.5841296E-02  -.5813493E-02  -.4339406E-02
  -.1641801E-02   .1635956E-02   .5327823E-02   .8938857E-02   .1191038E-01
   .1406019E-01   .1581500E-01   .1718721E-01   .1831485E-01   .1944341E-01
   .2030692E-01   .2068013E-01   .2085132E-01   .2163016E-01   .2275882E-01
   .2361547E-01   .2457653E-01   .2553648E-01   .2603908E-01   .2607660E-01
   .2580129E-01   .2480562E-01   .2313057E-01   .2090907E-01   .1786732E-01
   .1375369E-01   .8973171E-02   .4009105E-02  -.1041577E-02  -.6136881E-02
  -.1103231E-01  -.1568048E-01  -.1984554E-01  -.2324493E-01  -.2633120E-01
  -.2948435E-01  -.3256887E-01  -.3535115E-01  -.3726268E-01  -.3801707E-01
  -.3825126E-01  -.3835868E-01  -.3862777E-01  -.3941982E-01  -.4035653E-01
  -.4085622E-01  -.4085362E-01  -.4064582E-01  -.4043070E-01  -.3978667E-01
  -.3815698E-01  -.3536453E-01  -.3145263E-01  -.2708169E-01  -.2292694E-01
  -.1885034E-01  -.1484463E-01  -.1115882E-01  -.8261111E-02  -.6082715E-02
  -.3963967E-02  -.1991698E-02  -.8910047E-03  -.9550872E-03  -.1979643E-02
  -.3403866E-02  -.5031857E-02  -.7066798E-02  -.9514941E-02  -.1217404E-01
  -.1487405E-01  -.1757672E-01  -.2051973E-01  -.2403498E-01  -.2820648E-01
  -.3256182E-01  -.3613939E-01  -.3908552E-01  -.4217058E-01  -.4508347E-01
  -.4770172E-01  -.4986100E-01  -.5101970E-01  -.5121393E-01  -.5063653E-01
  -.4908727E-01  -.4674843E-01  -.4407202E-01  -.4123112E-01  -.3815020E-01
  -.3511837E-01  -.3231898E-01  -.2950550E-01  -.2638997E-01  -.2361469E-01
  -.2178453E-01  -.2053182E-01  -.1980650E-01  -.1953635E-01  -.1943981E-01
  -.1896200E-01  -.1737964E-01  -.1459027E-01  -.1072239E-01  -.5805473E-02
  -.7069207E-04   .5883113E-02   .1176653E-01   .1710984E-01   .2120743E-01
   .2329229E-01   .2320101E-01   .2167785E-01   .1928287E-01   .1617065E-01
   .1239931E-01   .8227445E-02   .4164363E-02   .2042330E-03  -.3280032E-02
  -.6331498E-02  -.9034645E-02  -.1065336E-01  -.1105680E-01  -.1049315E-01
  -.8899224E-02  -.6555770E-02  -.3931270E-02  -.1329907E-02   .1157618E-02
   .3243356E-02   .4340129E-02   .4540586E-02   .4380182E-02   .4002796E-02
   .3024721E-02   .1560282E-02  -.9265578E-04  -.1935648E-02  -.3721381E-02
  -.5356043E-02  -.6969220E-02  -.8113921E-02  -.8499377E-02  -.8155238E-02
  -.6830979E-02  -.4704024E-02  -.2361251E-02   .2661660E-03   .3087137E-02
   .5840349E-02   .8347999E-02   .1031941E-01   .1163696E-01   .1201483E-01
   .1118783E-01   .9817300E-02   .8231052E-02   .6543600E-02   .4564703E-02
   .2139979E-02  -.7002394E-03  -.3939134E-02  -.7130298E-02  -.9705220E-02
  -.1131820E-01  -.1279158E-01  -.1492223E-01  -.1770471E-01  -.2069493E-01
  -.2350414E-01  -.2582144E-01  -.2709670E-01  -.2736170E-01  -.2722687E-01
  -.2732943E-01  -.2809966E-01  -.2932845E-01  -.3037915E-01  -.3123454E-01
  -.3205706E-01  -.3263412E-01  -.3285519E-01  -.3299284E-01  -.3358984E-01
  -.3479471E-01  -.3628501E-01  -.3761432E-01  -.3844668E-01  -.3910151E-01
  -.3977365E-01  -.3984501E-01  -.3886431E-01  -.3669273E-01  -.3328944E-01
  -.2876761E-01  -.2357927E-01  -.1812670E-01  -.1228683E-01  -.5822846E-02
   .1420023E-02   .9147218E-02   .1672994E-01   .2392576E-01   .3046344E-01
   .3639548E-01   .4140163E-01   .4514303E-01   .4767216E-01   .4885176E-01
   .4864042E-01   .4742407E-01   .4575529E-01   .4460155E-01   .4412568E-01
   .4360792E-01   .4339278E-01   .4398190E-01   .4523636E-01   .4680958E-01
   .4862205E-01   .5051880E-01   .5264119E-01   .5524809E-01   .5854434E-01
   .6227680E-01   .6572860E-01   .6846549E-01   .7049075E-01   .7215614E-01
   .7299737E-01   .7219399E-01   .6979324E-01   .6646605E-01   .6321395E-01
   .6053285E-01   .5834601E-01   .5668515E-01   .5555219E-01   .5437325E-01
   .5331052E-01   .5275436E-01   .5265505E-01   .5262803E-01   .5234902E-01
   .5227553E-01   .5273884E-01   .5391705E-01   .5535400E-01   .5711317E-01
   .5933389E-01   .6165357E-01   .6339731E-01   .6498380E-01   .6682966E-01
   .6853918E-01   .7031432E-01   .7230819E-01   .7402607E-01   .7547087E-01
   .7653342E-01   .7718592E-01   .7703690E-01   .7575562E-01   .7281011E-01
   .6781222E-01   .6108352E-01   .5275535E-01   .4277491E-01   .3191372E-01
   .2122752E-01   .1152337E-01   .3128898E-02  -.3836327E-02  -.9028358E-02
  -.1231577E-01  -.1441015E-01  -.1592514E-01  -.1748155E-01  -.1900197E-01
  -.2052241E-01  -.2166993E-01  -.2223941E-01  -.2301441E-01  -.2407813E-01
  -.2521418E-01  -.2649362E-01  -.2820236E-01  -.3017309E-01  -.3240251E-01
  -.3531408E-01  -.3891355E-01  -.4254879E-01  -.4595985E-01  -.4904057E-01
  -.5178804E-01  -.5433963E-01  -.5656798E-01  -.5864701E-01  -.6056214E-01
  -.6219592E-01  -.6366017E-01  -.6532517E-01  -.6687855E-01  -.6835053E-01
  -.6948735E-01  -.7000633E-01  -.7044739E-01  -.7130745E-01  -.7221594E-01
  -.7267416E-01  -.7267255E-01  -.7259286E-01  -.7316880E-01  -.7430535E-01
  -.7512515E-01  -.7519743E-01  -.7424585E-01  -.7234171E-01  -.6927559E-01
  -.6454929E-01  -.5858109E-01  -.5173033E-01  -.4460912E-01  -.3763772E-01
  -.3039519E-01  -.2264866E-01  -.1462054E-01  -.6831273E-02   .5623764E-03
   .7382995E-02   .1336135E-01   .1871315E-01   .2365452E-01   .2851500E-01
   .3366878E-01   .3899249E-01   .4372689E-01   .4752841E-01   .5068065E-01
   .5342314E-01   .5573845E-01   .5751030E-01   .5859241E-01   .5899369E-01
   .5901950E-01   .5895295E-01   .5868080E-01   .5790763E-01   .5644611E-01
   .5452039E-01   .5278510E-01   .5172056E-01   .5149660E-01   .5217527E-01
   .5368614E-01   .5544188E-01   .5742131E-01   .5997631E-01   .6284894E-01
   .6569674E-01   .6856584E-01   .7116784E-01   .7302970E-01   .7432586E-01
   .7494210E-01   .7474991E-01   .7326817E-01   .6999000E-01   .6518234E-01
   .5968671E-01   .5373378E-01   .4690544E-01   .3923453E-01   .3119189E-01
   .2345497E-01   .1674251E-01   .1160764E-01   .7873431E-02   .4792510E-02
   .2365454E-02   .1069586E-02   .7534452E-03   .8261627E-03   .8374403E-03
   .6745096E-03   .1005561E-03  -.1089932E-02  -.2495847E-02  -.4114856E-02
  -.5906908E-02  -.8053210E-02  -.1059887E-01  -.1353280E-01  -.1698158E-01
  -.2083847E-01  -.2503862E-01  -.2956950E-01  -.3401589E-01  -.3810055E-01
  -.4157538E-01  -.4414963E-01  -.4597648E-01  -.4693812E-01  -.4718680E-01
  -.4679862E-01  -.4572421E-01  -.4424081E-01  -.4219911E-01  -.4007331E-01
  -.3794995E-01  -.3574902E-01  -.3376020E-01  -.3205632E-01  -.3039989E-01
  -.2933723E-01  -.2951912E-01  -.3072478E-01  -.3224011E-01  -.3345821E-01
  -.3425210E-01  -.3518891E-01  -.3622361E-01  -.3733793E-01  -.3872110E-01
  -.4055184E-01  -.4242351E-01  -.4383220E-01  -.4446652E-01  -.4450767E-01
  -.4440267E-01  -.4437824E-01  -.4421820E-01  -.4341465E-01  -.4245242E-01
  -.4209791E-01  -.4273509E-01  -.4422227E-01  -.4620932E-01  -.4814608E-01
  -.4990439E-01  -.5140669E-01  -.5237954E-01  -.5296833E-01  -.5296922E-01
  -.5216040E-01  -.5069037E-01  -.4827862E-01  -.4484093E-01  -.4077221E-01
  -.3635872E-01  -.3229281E-01  -.2877481E-01  -.2562069E-01  -.2248697E-01
  -.1965871E-01  -.1734501E-01  -.1590346E-01  -.1544320E-01  -.1550270E-01
  -.1558192E-01  -.1547702E-01  -.1513813E-01  -.1413964E-01  -.1281101E-01
  -.1123390E-01  -.9292623E-02  -.7693734E-02  -.6638761E-02  -.5609648E-02
  -.4081046E-02  -.2475256E-02  -.9001859E-03   .4459445E-03   .1753967E-02
   .2831591E-02   .3391547E-02   .3735590E-02   .3866733E-02   .3650432E-02
   .3351013E-02   .2873302E-02   .1959292E-02   .6735340E-03  -.7423942E-03
  -.2097369E-02  -.3432512E-02  -.5054049E-02  -.6987450E-02  -.9091270E-02
  -.1115454E-01  -.1307657E-01  -.1444807E-01  -.1439519E-01  -.1328160E-01
  -.1229069E-01  -.1148031E-01  -.1061179E-01  -.9358406E-02  -.7332258E-02
  -.4684523E-02  -.1855774E-02   .8499988E-03   .3406060E-02   .5830397E-02
   .7616520E-02   .8351853E-02   .8368866E-02   .8346897E-02   .9086311E-02
   .1041281E-01   .1144902E-01   .1231831E-01   .1323397E-01   .1415906E-01
   .1519994E-01   .1608265E-01   .1648998E-01   .1650330E-01   .1639345E-01
   .1624763E-01   .1554166E-01   .1400693E-01   .1189417E-01   .9503087E-02
   .7282076E-02   .5354994E-02   .3853954E-02   .2637364E-02   .1508851E-02
   .8509045E-03   .1151979E-02   .2337074E-02   .3850802E-02   .5797086E-02
   .8189731E-02   .1082712E-01   .1350455E-01   .1606217E-01   .1804257E-01
   .1895629E-01   .1925600E-01   .1939327E-01   .1924443E-01   .1879128E-01
   .1785559E-01   .1606169E-01   .1323955E-01   .9834274E-02   .6152519E-02
   .2582463E-02  -.6498205E-03  -.3272959E-02  -.5029429E-02  -.6029181E-02
  -.5931480E-02  -.5104815E-02  -.3973140E-02  -.2267073E-02   .8479022E-04
   .2981055E-02   .5984789E-02   .8504641E-02   .1072974E-01   .1281018E-01
   .1451031E-01   .1514405E-01   .1418416E-01   .1217391E-01   .9696935E-02
   .7181121E-02   .4988596E-02   .3384557E-02   .2455091E-02   .2411102E-02
   .3471131E-02   .5343872E-02   .7495473E-02   .1025049E-01   .1379860E-01
   .1754637E-01   .2126370E-01   .2452389E-01   .2701727E-01   .2925845E-01
   .3165887E-01   .3379623E-01   .3490618E-01   .3502491E-01   .3449722E-01
   .3334346E-01   .3153049E-01   .2935850E-01   .2729510E-01   .2537738E-01
   .2373411E-01   .2235836E-01   .2108492E-01   .1996742E-01   .1949329E-01
   .1968546E-01   .1989822E-01   .1996317E-01   .1959854E-01   .1892604E-01
   .1798488E-01   .1698749E-01   .1605177E-01   .1491329E-01   .1384600E-01
   .1278133E-01   .1138225E-01   .9496483E-02   .7421367E-02   .5131407E-02
   .2629860E-02  -.5623024E-05  -.2678437E-02  -.5338808E-02  -.7969212E-02
  -.1061422E-01  -.1329579E-01  -.1599662E-01  -.1867153E-01  -.2132301E-01
  -.2379298E-01  -.2590584E-01  -.2785869E-01  -.2978397E-01  -.3179797E-01
  -.3365161E-01  -.3519787E-01  -.3670895E-01  -.3834040E-01  -.3981289E-01
  -.4121777E-01  -.4213252E-01  -.4236384E-01  -.4185544E-01  -.4043932E-01
  -.3827960E-01  -.3504542E-01  -.3057363E-01  -.2532680E-01  -.1990651E-01
  -.1447113E-01  -.9048309E-02  -.4352749E-02  -.8495256E-03   .1810653E-02
   .3921424E-02   .5188665E-02   .5986798E-02   .7033361E-02   .8027916E-02
   .8896239E-02   .9990025E-02   .1085725E-01   .1120606E-01   .1154673E-01
   .1252964E-01   .1392236E-01   .1545706E-01   .1642218E-01   .1661180E-01
   .1637722E-01   .1581866E-01   .1476070E-01   .1351922E-01   .1215676E-01
   .1087907E-01   .9387546E-02   .7786435E-02   .6285869E-02   .4903505E-02
   .3418567E-02   .1754754E-02   .2533382E-03  -.1129744E-02  -.1997151E-02
  -.2232870E-02  -.2149568E-02  -.2075818E-02  -.2130377E-02  -.2253608E-02
  -.2350870E-02  -.2429648E-02  -.2921030E-02  -.4029469E-02  -.5425042E-02
  -.6867352E-02  -.8194184E-02  -.9724520E-02  -.1158436E-01  -.1388362E-01
  -.1627087E-01  -.1841294E-01  -.2032150E-01  -.2187722E-01  -.2298792E-01
  -.2392799E-01  -.2441377E-01  -.2397941E-01  -.2276583E-01  -.2132939E-01
  -.1992648E-01  -.1843142E-01  -.1690632E-01  -.1521216E-01  -.1370320E-01
  -.1287288E-01  -.1215330E-01  -.1132032E-01  -.1131205E-01  -.1220438E-01
  -.1310444E-01  -.1382510E-01  -.1459693E-01  -.1522808E-01  -.1549722E-01
  -.1550840E-01  -.1553601E-01  -.1591058E-01  -.1613048E-01  -.1600624E-01
  -.1607195E-01  -.1607535E-01  -.1582356E-01  -.1539757E-01  -.1437847E-01
  -.1300823E-01  -.1153718E-01  -.1050699E-01  -.9945384E-02  -.9121879E-02
  -.8200284E-02  -.7693794E-02  -.7635464E-02  -.7757953E-02  -.7823474E-02
  -.7752700E-02  -.7370452E-02  -.6154977E-02  -.4313053E-02  -.2342514E-02
  -.2145836E-03   .2153271E-02   .4720319E-02   .7198318E-02   .9175857E-02
   .1082364E-01   .1279622E-01   .1529327E-01   .1770722E-01   .1941207E-01
   .2068538E-01   .2180243E-01   .2312906E-01   .2442848E-01   .2564955E-01
   .2663322E-01   .2709902E-01   .2713261E-01   .2696948E-01   .2639898E-01
   .2528320E-01   .2393746E-01   .2260004E-01   .2183088E-01   .2144518E-01
   .2078573E-01   .1985228E-01   .1923482E-01   .1938030E-01   .2002652E-01
   .2056890E-01   .2100532E-01   .2142612E-01   .2172109E-01   .2211136E-01
   .2263342E-01   .2299748E-01   .2309156E-01   .2296080E-01   .2249377E-01
   .2201582E-01   .2208824E-01   .2225454E-01   .2213045E-01   .2188241E-01
   .2171476E-01   .2168809E-01   .2174489E-01   .2197271E-01   .2291008E-01
   .2430769E-01   .2587489E-01   .2722890E-01   .2873572E-01   .3072192E-01
   .3275895E-01   .3455557E-01   .3624748E-01   .3769775E-01   .3904813E-01
   .3958687E-01   .3865062E-01   .3684654E-01   .3474321E-01   .3219275E-01
   .2939972E-01   .2664802E-01   .2402818E-01   .2161595E-01   .1962471E-01
   .1812002E-01   .1712319E-01   .1668204E-01   .1666240E-01   .1719698E-01
   .1830245E-01   .1962389E-01   .2099764E-01   .2233065E-01   .2356050E-01
   .2423430E-01   .2428709E-01   .2370545E-01   .2226911E-01   .1996232E-01
   .1684999E-01   .1290163E-01   .8719556E-02   .4663962E-02   .4710049E-03
  -.3098516E-02  -.5612967E-02  -.7064379E-02  -.8250589E-02  -.9358639E-02
  -.9921703E-02  -.9309444E-02  -.8000061E-02  -.6427226E-02  -.4995449E-02
  -.3707842E-02  -.2838159E-02  -.2541848E-02  -.2571885E-02  -.2619325E-02
  -.2559536E-02  -.2442100E-02  -.2359174E-02  -.2346535E-02  -.2380655E-02
  -.2416138E-02  -.2430037E-02  -.2417009E-02  -.2369178E-02  -.1956307E-02
  -.8493236E-03   .5840087E-03   .2476874E-02   .4945443E-02   .7795871E-02
   .1058146E-01   .1267303E-01   .1379391E-01   .1460468E-01   .1545259E-01
   .1608206E-01   .1634911E-01   .1629525E-01   .1562389E-01   .1435640E-01
   .1284015E-01   .1144153E-01   .1011776E-01   .8557083E-02   .6653915E-02
   .4582567E-02   .2563715E-02   .9769815E-03  -.4804673E-04  -.9419325E-03
  -.1751825E-02  -.2323737E-02  -.3025040E-02  -.3419633E-02  -.3048466E-02
  -.2527589E-02  -.2640940E-02  -.3529577E-02  -.4223297E-02  -.3866129E-02
  -.2948812E-02  -.2647348E-02  -.3433229E-02  -.4593579E-02  -.5324242E-02
  -.5839186E-02  -.6576557E-02  -.7446041E-02  -.8752409E-02  -.1051889E-01
  -.1267676E-01  -.1517148E-01  -.1787395E-01  -.2084248E-01  -.2358976E-01
  -.2589481E-01  -.2773829E-01  -.2920477E-01  -.3060709E-01  -.3230489E-01
  -.3376126E-01  -.3440657E-01  -.3438746E-01  -.3418754E-01  -.3413111E-01
  -.3424076E-01  -.3437389E-01  -.3427954E-01  -.3333467E-01  -.3155929E-01
  -.2930410E-01  -.2680902E-01  -.2430684E-01  -.2213358E-01  -.2009589E-01
  -.1794388E-01  -.1614721E-01  -.1460670E-01  -.1351000E-01  -.1306853E-01
  -.1307167E-01  -.1329585E-01  -.1391374E-01  -.1498541E-01  -.1633222E-01
  -.1783951E-01  -.1962310E-01  -.2140853E-01  -.2292217E-01  -.2421228E-01
  -.2531509E-01  -.2599573E-01  -.2621022E-01  -.2616225E-01  -.2584981E-01
  -.2491067E-01  -.2365060E-01  -.2224414E-01  -.2098057E-01  -.1969703E-01
  -.1845814E-01  -.1709255E-01  -.1575701E-01  -.1436518E-01  -.1330039E-01
  -.1263419E-01  -.1171597E-01  -.1035966E-01  -.8345958E-02  -.5766541E-02
  -.2819578E-02   .3898387E-03   .3444636E-02   .6179063E-02   .8748154E-02
   .1132582E-01   .1381009E-01   .1601761E-01   .1820672E-01   .2026225E-01
   .2147451E-01   .2174644E-01   .2158302E-01   .2144197E-01   .2113081E-01
   .2020564E-01   .1892092E-01   .1728743E-01   .1560110E-01   .1394511E-01
   .1214828E-01   .1043719E-01   .9116359E-02   .8136105E-02   .7032382E-02
   .5952550E-02   .4856447E-02   .3788924E-02   .2774335E-02   .1557088E-02
   .4439722E-03  -.5885779E-03  -.1537293E-02  -.2083327E-02  -.2211959E-02
  -.2163823E-02  -.2351093E-02  -.3134252E-02  -.4223709E-02  -.4932277E-02
  -.5044478E-02  -.4851206E-02  -.4697428E-02  -.4729043E-02  -.5071133E-02
  -.5917493E-02  -.6969570E-02  -.7610138E-02  -.7705889E-02  -.7727725E-02
  -.8290951E-02  -.8954427E-02  -.8681238E-02  -.7699015E-02  -.6441010E-02
  -.5282487E-02  -.4225777E-02  -.3052292E-02  -.1785579E-02  -.4542012E-03
   .4000607E-03   .8839112E-03   .1566839E-02   .2450053E-02   .3058434E-02
   .3287583E-02   .3745531E-02   .4781104E-02   .5684660E-02   .6040755E-02
   .6233230E-02   .6863351E-02   .7833793E-02   .8785620E-02   .9780620E-02
   .1072414E-01   .1171404E-01   .1291503E-01   .1401060E-01   .1505657E-01
   .1597019E-01   .1643137E-01   .1648096E-01   .1639696E-01   .1637720E-01
   .1646512E-01   .1657899E-01   .1662910E-01   .1655575E-01   .1597301E-01
   .1475826E-01   .1333166E-01   .1194072E-01   .1068082E-01   .9180999E-02
   .7343159E-02   .5275722E-02   .3244355E-02   .1560164E-02   .7421299E-03
   .6059097E-03   .2397042E-03  -.8125927E-03  -.1807168E-02  -.2216999E-02
  -.2200908E-02  -.2542810E-02  -.3575396E-02  -.4513247E-02  -.4895615E-02
  -.5077793E-02  -.5696562E-02  -.6555864E-02  -.6639879E-02  -.5670188E-02
  -.4655292E-02  -.4252116E-02  -.4327456E-02  -.4044341E-02  -.3009322E-02
  -.1969854E-02  -.1046314E-02  -.2490418E-04   .6031517E-03   .3864865E-03
  -.6108355E-03  -.1625801E-02  -.2014391E-02  -.1867741E-02  -.1609951E-02
  -.1521922E-02  -.1562191E-02  -.1304110E-02  -.4579285E-03   .5150931E-03
   .9761832E-03   .6928288E-03   .2883452E-03   .2644320E-03  -.5890182E-04
  -.9578186E-03  -.2078748E-02  -.3267559E-02  -.4495741E-02  -.5768860E-02
  -.7077658E-02  -.8366224E-02  -.9644701E-02  -.1089647E-01  -.1193142E-01
  -.1301249E-01  -.1423646E-01  -.1561116E-01  -.1694357E-01  -.1797893E-01
  -.1893111E-01  -.1973436E-01  -.2024978E-01  -.2099925E-01  -.2205134E-01
  -.2278502E-01  -.2297819E-01  -.2290640E-01  -.2311066E-01  -.2360642E-01
  -.2372868E-01  -.2320015E-01  -.2193006E-01  -.2043268E-01  -.1886469E-01
  -.1727527E-01  -.1576076E-01  -.1395517E-01  -.1159867E-01  -.8963063E-02
  -.6680148E-02  -.4970702E-02  -.3394537E-02  -.2149217E-02  -.1425916E-02
  -.5085498E-03   .5717965E-03   .1247779E-02   .1383031E-02   .1109567E-02
   .2812532E-03   .5068428E-05   .6057099E-03   .1289251E-02   .1564564E-02
   .1612468E-02   .2244826E-02   .3261010E-02   .3941879E-02   .4219597E-02
   .4930140E-02   .6108041E-02   .7630470E-02   .8916402E-02   .9571533E-02
   .1033909E-01   .1127617E-01   .1187049E-01   .1186254E-01   .1088568E-01
   .9669825E-02   .8840430E-02   .8001070E-02   .7237741E-02   .6605800E-02
   .5631592E-02   .4648839E-02   .4152135E-02   .4127857E-02   .4280085E-02
   .4377472E-02   .4354445E-02   .4272690E-02   .4213548E-02   .4209078E-02
   .4240857E-02   .4292527E-02   .4483094E-02   .5126279E-02   .6149724E-02
   .6941618E-02   .7177212E-02   .7048805E-02   .6895245E-02   .6886224E-02
   .6988356E-02   .7089111E-02   .7124423E-02   .7113804E-02   .7183076E-02
   .7671207E-02   .8662475E-02   .9588571E-02   .9976941E-02   .9905957E-02
   .9732690E-02   .9760346E-02   .1034218E-01   .1144939E-01   .1238466E-01
   .1270024E-01   .1255496E-01   .1234861E-01   .1229642E-01   .1237713E-01
   .1248251E-01   .1253001E-01   .1250603E-01   .1238030E-01   .1184598E-01
   .1076197E-01   .9371095E-02   .7981439E-02   .6687807E-02   .5447352E-02
   .4177028E-02   .2930836E-02   .2081937E-02   .1801692E-02   .1854506E-02
   .1945185E-02   .2070082E-02   .2806217E-02   .3859027E-02   .4500280E-02
   .4576522E-02   .4391330E-02   .4266629E-02   .4296306E-02   .4323819E-02
   .3879162E-02   .2785476E-02   .1247739E-02  -.6617470E-03  -.2632624E-02
  -.4601216E-02  -.6413366E-02  -.7983645E-02  -.9640251E-02  -.1114771E-01
  -.1261071E-01  -.1377782E-01  -.1428748E-01  -.1429635E-01  -.1418084E-01
  -.1415766E-01  -.1410101E-01  -.1334941E-01  -.1224951E-01  -.1158640E-01
  -.1151121E-01  -.1162646E-01  -.1126198E-01  -.1022741E-01  -.9205841E-02
  -.8763149E-02  -.8681482E-02  -.7951476E-02  -.6375395E-02  -.4510219E-02
  -.2464436E-02  -.1369530E-03   .2318320E-02   .4431504E-02   .6241826E-02
   .8033609E-02   .9960686E-02   .1170353E-01   .1316428E-01   .1431523E-01
   .1488816E-01   .1503223E-01   .1527374E-01   .1550281E-01   .1540487E-01
   .1517527E-01   .1498329E-01   .1459168E-01   .1376046E-01   .1287928E-01
   .1243692E-01   .1243969E-01   .1259642E-01   .1266860E-01   .1265830E-01
   .1283647E-01   .1302860E-01   .1314625E-01   .1320043E-01   .1357101E-01
   .1438651E-01   .1504728E-01   .1534324E-01   .1592740E-01   .1693333E-01
   .1779751E-01   .1871867E-01   .1974117E-01   .2037434E-01   .2049795E-01
   .2032223E-01   .1982114E-01   .1889041E-01   .1760198E-01   .1584867E-01
   .1360151E-01   .1136174E-01   .9569058E-02   .7930799E-02   .6147352E-02
   .4139097E-02   .2084810E-02   .2875097E-03  -.1453795E-02  -.3305438E-02
  -.5338726E-02  -.7653742E-02  -.9907951E-02  -.1168542E-01  -.1300899E-01
  -.1420176E-01  -.1545851E-01  -.1649797E-01  -.1699016E-01  -.1703313E-01
  -.1693130E-01  -.1690899E-01  -.1704183E-01  -.1753135E-01  -.1847005E-01
  -.1944102E-01  -.2026516E-01  -.2119968E-01  -.2236978E-01  -.2371134E-01
  -.2505045E-01  -.2630599E-01  -.2758300E-01  -.2917099E-01  -.3129722E-01
  -.3339642E-01  -.3500899E-01  -.3651288E-01  -.3800474E-01  -.3940690E-01
  -.4050564E-01  -.4124774E-01  -.4182951E-01  -.4217078E-01  -.4226055E-01
  -.4200771E-01  -.4146130E-01  -.4099668E-01  -.4036644E-01  -.3929620E-01
  -.3799007E-01  -.3660741E-01  -.3551516E-01  -.3455026E-01  -.3370915E-01
  -.3321443E-01  -.3281783E-01  -.3203506E-01  -.3103419E-01  -.3039617E-01
  -.3028092E-01  -.3042723E-01  -.3054641E-01  -.3052799E-01  -.3042980E-01
  -.3031888E-01  -.3001061E-01  -.2923542E-01  -.2829166E-01  -.2768863E-01
  -.2707511E-01  -.2600838E-01  -.2464883E-01  -.2319625E-01  -.2185809E-01
  -.2055142E-01  -.1924729E-01  -.1743405E-01  -.1522825E-01  -.1323535E-01
  -.1152428E-01  -.1004437E-01  -.8970353E-02  -.8006955E-02  -.7045112E-02
  -.5900117E-02  -.4603858E-02  -.3695679E-02  -.2830858E-02  -.1791827E-02
  -.7433670E-03   .4044462E-03   .1686805E-02   .3076487E-02   .4707165E-02
   .6304206E-02   .7848752E-02   .9791781E-02   .1197006E-01   .1416079E-01
   .1649842E-01   .1905419E-01   .2174946E-01   .2446681E-01   .2713106E-01
   .2975129E-01   .3233787E-01   .3465519E-01   .3671798E-01   .3861716E-01
   .4030957E-01   .4201335E-01   .4349612E-01   .4434632E-01   .4513458E-01
   .4614522E-01   .4698442E-01   .4793028E-01   .4906413E-01   .5013802E-01
   .5119898E-01   .5214069E-01   .5318436E-01   .5429511E-01   .5501705E-01
   .5556643E-01   .5638092E-01   .5724864E-01   .5773599E-01   .5780056E-01
   .5768516E-01   .5761674E-01   .5765487E-01   .5773861E-01   .5779155E-01
   .5779451E-01   .5776900E-01   .5774819E-01   .5774780E-01   .5775796E-01
   .5777318E-01   .5778077E-01   .5777401E-01   .5765133E-01   .5688606E-01
   .5530001E-01   .5322575E-01   .5117831E-01   .4951682E-01   .4788449E-01
   .4576433E-01   .4307159E-01   .3987451E-01   .3647754E-01   .3310887E-01
   .2992101E-01   .2704472E-01   .2438270E-01   .2176083E-01   .1906449E-01
   .1630554E-01   .1356507E-01   .1088739E-01   .8263379E-02   .5704597E-02
   .3460888E-02   .1689349E-02  -.7295351E-04  -.2313843E-02  -.5008434E-02
  -.7909020E-02  -.1105799E-01  -.1457744E-01  -.1813822E-01  -.2154918E-01
  -.2482298E-01  -.2808871E-01  -.3128375E-01  -.3394081E-01  -.3607808E-01
  -.3793244E-01  -.3949594E-01  -.4060545E-01  -.4142089E-01  -.4229630E-01
  -.4278616E-01  -.4235277E-01  -.4147959E-01  -.4093082E-01  -.4088095E-01
  -.4106225E-01  -.4120835E-01  -.4122056E-01  -.4111989E-01  -.4105544E-01
  -.4136604E-01  -.4197722E-01  -.4246543E-01  -.4283814E-01  -.4287946E-01
  -.4222341E-01  -.4121457E-01  -.4002860E-01  -.3882358E-01  -.3757861E-01
  -.3631721E-01  -.3498787E-01  -.3364244E-01  -.3226585E-01  -.3092025E-01
  -.2958920E-01  -.2839936E-01  -.2767251E-01  -.2688600E-01  -.2585059E-01
  -.2501175E-01  -.2410731E-01  -.2298406E-01  -.2163507E-01  -.2023516E-01
  -.1875437E-01  -.1679857E-01  -.1464945E-01  -.1278542E-01  -.1103713E-01
  -.9265567E-02  -.7592880E-02  -.5825008E-02  -.3937454E-02  -.2174418E-02
  -.4322846E-03   .1033080E-02   .1842708E-02   .2577384E-02   .3535628E-02
   .4246462E-02   .4492963E-02   .4440761E-02   .4342005E-02   .4304165E-02
   .4075919E-02   .3338816E-02   .2383782E-02   .1778745E-02   .1400254E-02
   .7124872E-03  -.1873288E-03  -.7844674E-03  -.9233004E-03  -.8179671E-03
  -.7234851E-03  -.7404355E-03  -.8332011E-03  -.9593596E-03  -.1306414E-02
  -.2121544E-02  -.3078473E-02  -.3619483E-02  -.3722297E-02  -.4108165E-02
  -.5211742E-02  -.6721982E-02  -.8487966E-02  -.1013454E-01  -.1148925E-01
  -.1268692E-01  -.1389512E-01  -.1496269E-01  -.1578145E-01  -.1645357E-01
  -.1684036E-01  -.1694640E-01  -.1692196E-01  -.1687860E-01  -.1662915E-01
  -.1606584E-01  -.1536454E-01  -.1462610E-01  -.1372014E-01  -.1254973E-01
  -.1171033E-01  -.1120350E-01  -.1050322E-01  -.9602136E-02  -.8930138E-02
  -.8223777E-02  -.7151644E-02  -.6053265E-02  -.4984049E-02  -.4069357E-02
  -.3351717E-02  -.2459773E-02  -.1231077E-02   .1688611E-03   .1369947E-02
   .2385258E-02   .3485435E-02   .4508766E-02   .5569279E-02   .6515616E-02
   .7009564E-02   .7074943E-02   .7001644E-02   .7178965E-02   .7965480E-02
   .9088261E-02   .9828746E-02   .9956584E-02   .9758707E-02   .9612788E-02
   .9835458E-02   .1067826E-01   .1181265E-01   .1253327E-01   .1265496E-01
   .1281230E-01   .1368895E-01   .1469342E-01   .1519711E-01   .1518841E-01
   .1502778E-01   .1533218E-01   .1644985E-01   .1754986E-01   .1799090E-01
   .1790377E-01   .1806009E-01   .1904249E-01   .2012665E-01   .2063666E-01
   .2058644E-01   .2036094E-01   .2025647E-01   .2035394E-01   .2086601E-01
   .2197419E-01   .2292901E-01   .2324375E-01   .2308958E-01   .2286960E-01
   .2282424E-01   .2293166E-01   .2305819E-01   .2311543E-01   .2309829E-01
   .2304850E-01   .2301349E-01   .2300302E-01   .2301513E-01   .2302835E-01
   .2303766E-01   .2304303E-01   .2303900E-01   .2302825E-01   .2300806E-01
   .2285814E-01   .2226080E-01   .2127252E-01   .2035457E-01   .1949714E-01
   .1860170E-01   .1794915E-01   .1745097E-01   .1651908E-01   .1550854E-01
   .1496968E-01   .1479547E-01   .1435003E-01   .1344462E-01   .1262982E-01
   .1229250E-01   .1219849E-01   .1171747E-01   .1074387E-01   .9882943E-02
   .9406349E-02   .8862581E-02   .8023671E-02   .7164051E-02   .6223453E-02
   .5058193E-02   .3716926E-02   .2219241E-02   .4083302E-03  -.1441904E-02
  -.3021200E-02  -.4449377E-02  -.6148005E-02  -.7970775E-02  -.9610541E-02
  -.1099541E-01  -.1224714E-01  -.1352764E-01  -.1487251E-01  -.1613722E-01
  -.1704695E-01  -.1784217E-01  -.1874704E-01  -.1959436E-01  -.2052946E-01
  -.2181721E-01  -.2351307E-01  -.2509771E-01  -.2663949E-01  -.2806572E-01
  -.2918354E-01  -.3048674E-01  -.3207866E-01  -.3367365E-01  -.3511503E-01
  -.3641323E-01  -.3754921E-01  -.3826932E-01  -.3874384E-01  -.3963262E-01
  -.4063081E-01  -.4117937E-01  -.4124403E-01  -.4125575E-01  -.4180983E-01
  -.4287332E-01  -.4375099E-01  -.4403431E-01  -.4390164E-01  -.4371385E-01
  -.4367652E-01  -.4376421E-01  -.4373033E-01  -.4315329E-01  -.4196711E-01
  -.4051104E-01  -.3910838E-01  -.3781970E-01  -.3646069E-01  -.3471141E-01
  -.3271361E-01  -.3059850E-01  -.2856040E-01  -.2641103E-01  -.2397129E-01
  -.2130265E-01  -.1855664E-01  -.1584280E-01  -.1306703E-01  -.9961411E-02
  -.6784439E-02  -.3864308E-02  -.1213656E-02   .1352905E-02   .3984988E-02
   .6682012E-02   .9396924E-02   .1196670E-01   .1414148E-01   .1598972E-01
   .1742694E-01   .1879417E-01   .2010404E-01   .2150295E-01   .2272315E-01
   .2377603E-01   .2476825E-01   .2558155E-01   .2643543E-01   .2743776E-01
   .2831425E-01   .2917678E-01   .3013839E-01   .3084227E-01   .3108813E-01
   .3104958E-01   .3111112E-01   .3161209E-01   .3220160E-01   .3236290E-01
   .3187414E-01   .3122324E-01   .3090248E-01   .3092392E-01   .3081041E-01
   .2991780E-01   .2866276E-01   .2745658E-01   .2641923E-01   .2569231E-01
   .2497159E-01   .2404191E-01   .2326983E-01   .2280984E-01   .2223014E-01
   .2134143E-01   .2058323E-01   .2013489E-01   .1952663E-01   .1844058E-01
   .1702692E-01   .1556379E-01   .1407239E-01   .1234251E-01   .1056713E-01
   .8867848E-02   .6929780E-02   .4672606E-02   .2581743E-02   .8452739E-03
  -.7743184E-03  -.2046296E-02  -.3052197E-02  -.4077688E-02  -.5313064E-02
  -.6753321E-02  -.8093203E-02  -.9023204E-02  -.1003623E-01  -.1105240E-01
  -.1161565E-01  -.1177860E-01  -.1216774E-01  -.1311630E-01  -.1408186E-01
  -.1452370E-01  -.1448341E-01  -.1437203E-01  -.1478697E-01  -.1584759E-01
  -.1686450E-01  -.1727721E-01  -.1718074E-01  -.1695493E-01  -.1679003E-01
  -.1634819E-01  -.1543739E-01  -.1457873E-01  -.1414073E-01  -.1370305E-01
  -.1286943E-01  -.1202176E-01  -.1158464E-01  -.1140663E-01  -.1065710E-01
  -.9413267E-02  -.7881322E-02  -.6501835E-02  -.5114146E-02  -.3572724E-02
  -.1970202E-02  -.1945658E-03   .1295151E-02   .2359724E-02   .3370962E-02
   .4587323E-02   .5908421E-02   .6837659E-02   .7219287E-02   .7639584E-02
   .8532670E-02   .9456807E-02   .9905587E-02   .9892086E-02   .9718949E-02
   .9626893E-02   .9598041E-02   .9231548E-02   .8364104E-02   .7486939E-02
   .7075659E-02   .7085888E-02   .7165743E-02   .6798613E-02   .5796366E-02
   .4731841E-02   .4216130E-02   .4263502E-02   .4559956E-02   .5096364E-02
   .5972466E-02   .6804832E-02   .7274932E-02   .7944976E-02   .9051667E-02
   .1049004E-01   .1194556E-01   .1329852E-01   .1453220E-01   .1579335E-01
   .1700568E-01   .1770893E-01   .1791921E-01   .1822528E-01   .1902886E-01
   .1963574E-01   .1929937E-01   .1842505E-01   .1776190E-01   .1730598E-01
   .1684395E-01   .1619178E-01   .1512643E-01   .1374128E-01   .1229152E-01
   .1096919E-01   .1002081E-01   .9324100E-02   .8483560E-02   .7571981E-02
   .6675446E-02   .5673311E-02   .4820352E-02   .4444862E-02   .4468195E-02
   .4598608E-02   .4639490E-02   .4574746E-02   .4458284E-02   .4149191E-02
   .3576648E-02   .2904799E-02   .2245443E-02   .1875688E-02   .1813570E-02
   .1875886E-02   .1849396E-02   .1252889E-02  -.1511309E-03  -.1370734E-02
  -.1743988E-02  -.1795608E-02  -.2069169E-02  -.2738295E-02  -.3628001E-02
  -.4739648E-02  -.5778335E-02  -.6326040E-02  -.6622398E-02  -.7073277E-02
  -.7736766E-02  -.8484539E-02  -.8930508E-02  -.8980598E-02  -.8841191E-02
  -.8760843E-02  -.9073533E-02  -.1000025E-01  -.1107575E-01  -.1164115E-01
  -.1163355E-01  -.1140407E-01  -.1122403E-01  -.1075721E-01  -.9793809E-02
  -.8966222E-02  -.8227269E-02  -.7255000E-02  -.6487053E-02  -.6153606E-02
  -.5873457E-02  -.5116836E-02  -.4080650E-02  -.3410598E-02  -.3331294E-02
  -.3804022E-02  -.4807785E-02  -.5928473E-02  -.6822128E-02  -.7704810E-02
  -.8544211E-02  -.9035457E-02  -.9351634E-02  -.9754697E-02  -.1001498E-01
  -.9794602E-02  -.9141526E-02  -.8639339E-02  -.8565698E-02  -.8739419E-02
  -.8644931E-02  -.7880125E-02  -.6769800E-02  -.5643320E-02  -.4480111E-02
  -.3725087E-02  -.3520790E-02  -.3611684E-02  -.3700191E-02  -.3673131E-02
  -.3611879E-02  -.3595895E-02  -.3622968E-02  -.3628384E-02  -.3405467E-02
  -.2632799E-02  -.1586925E-02  -.9610482E-03  -.9218635E-03  -.1159298E-02
  -.1319375E-02  -.1257500E-02  -.1023520E-02  -.7581597E-03  -.5776481E-03
  -.5474088E-03  -.6597193E-03  -.1007577E-02  -.1666751E-02  -.2234582E-02
  -.2593715E-02  -.2823574E-02  -.2643905E-02  -.2105158E-02  -.1368332E-02
  -.8421080E-03  -.3529376E-03   .6134555E-03   .1884339E-02   .3325548E-02
   .4457268E-02   .5377482E-02   .6232880E-02   .6792752E-02   .6989461E-02
   .6988623E-02   .6972505E-02   .6993428E-02   .7016266E-02   .7038474E-02
   .7071983E-02   .7118350E-02   .7165208E-02   .7198122E-02   .7204399E-02
   .7186890E-02   .7155563E-02   .7121029E-02   .7102231E-02   .7259367E-02
   .7730336E-02   .8150026E-02   .8108248E-02   .7533759E-02   .6975190E-02
   .6817157E-02   .6983674E-02   .7216759E-02   .7334693E-02   .7331595E-02
   .7292322E-02   .7264714E-02   .7268458E-02   .7308609E-02   .7390853E-02
   .7648059E-02   .8177928E-02   .8432559E-02   .8027686E-02   .7396229E-02
   .6839190E-02   .6093093E-02   .5152568E-02   .4306220E-02   .3406963E-02
   .2463302E-02   .1840013E-02   .1619288E-02   .1401845E-02   .6503046E-03
  -.4705291E-03  -.1261976E-02  -.1442380E-02  -.1266470E-02  -.1278086E-02
  -.1949643E-02  -.2982012E-02  -.3605812E-02  -.3571446E-02  -.3169876E-02
  -.2780458E-02  -.2621657E-02  -.2695661E-02  -.2872153E-02  -.3017123E-02
  -.2929532E-02  -.2331904E-02  -.1419448E-02  -.7699331E-03  -.3777446E-03
   .4196340E-03   .1360379E-02   .1893699E-02   .1946050E-02   .1767517E-02
   .1474999E-02   .8078413E-03  -.1890441E-03  -.1090174E-02  -.1942574E-02
  -.2966217E-02  -.4204948E-02  -.5561356E-02  -.6912126E-02  -.8089102E-02
  -.8918415E-02  -.9725074E-02  -.1069496E-01  -.1145241E-01  -.1173656E-01
  -.1166481E-01  -.1149905E-01  -.1139236E-01  -.1134890E-01  -.1119941E-01
  -.1070801E-01  -.1026559E-01  -.1031197E-01  -.1039257E-01  -.1038786E-01
  -.1065814E-01  -.1105245E-01  -.1127121E-01  -.1128760E-01  -.1133967E-01
  -.1176837E-01  -.1237054E-01  -.1282972E-01  -.1329173E-01  -.1347069E-01
  -.1362568E-01  -.1394494E-01  -.1423409E-01  -.1436297E-01  -.1435927E-01
  -.1430699E-01  -.1426698E-01  -.1425453E-01  -.1425753E-01  -.1425564E-01
  -.1417743E-01  -.1367058E-01  -.1267999E-01  -.1181414E-01  -.1150695E-01
  -.1154236E-01  -.1121563E-01  -.1023247E-01  -.9211260E-02  -.8737509E-02
  -.8789518E-02  -.9010899E-02  -.9191596E-02  -.9584609E-02  -.1013708E-01
  -.1079680E-01  -.1133458E-01  -.1159492E-01  -.1200269E-01  -.1286153E-01
  -.1377795E-01  -.1462138E-01  -.1550214E-01  -.1626649E-01  -.1691399E-01
  -.1751341E-01  -.1816072E-01  -.1881288E-01  -.1923022E-01  -.1939110E-01
  -.1949250E-01  -.1997371E-01  -.2102936E-01  -.2213304E-01  -.2271054E-01
  -.2276727E-01  -.2264021E-01  -.2258217E-01  -.2262086E-01  -.2260677E-01
  -.2217285E-01  -.2113552E-01  -.1996388E-01  -.1897992E-01  -.1802810E-01
  -.1712585E-01  -.1600778E-01  -.1471493E-01  -.1353883E-01  -.1239442E-01
  -.1119295E-01  -.9912338E-02  -.8602081E-02  -.7367551E-02  -.6407362E-02
  -.5407996E-02  -.4223632E-02  -.2849018E-02  -.1454183E-02  -.8880471E-04
   .1161666E-02   .2172212E-02   .3162148E-02   .4107171E-02   .5226110E-02
   .6451597E-02   .7505792E-02   .8539767E-02   .9708676E-02   .1097169E-01
   .1200479E-01   .1278785E-01   .1364557E-01   .1445877E-01   .1491578E-01
   .1502991E-01   .1501960E-01   .1505032E-01   .1515143E-01   .1525792E-01
   .1534790E-01   .1561140E-01   .1593751E-01   .1607045E-01   .1606214E-01
   .1575062E-01   .1541222E-01   .1525288E-01   .1524564E-01   .1525045E-01
   .1518974E-01   .1508164E-01   .1498160E-01   .1490087E-01   .1461787E-01
   .1385144E-01   .1291804E-01   .1239517E-01   .1237247E-01   .1255912E-01
   .1266854E-01   .1262635E-01   .1251630E-01   .1244218E-01   .1244242E-01
   .1248267E-01   .1254697E-01   .1284542E-01   .1363439E-01   .1458782E-01
   .1515160E-01   .1548748E-01   .1615741E-01   .1711164E-01   .1805659E-01
   .1911113E-01   .2037880E-01   .2174698E-01   .2286883E-01   .2343271E-01
   .2380389E-01   .2457501E-01   .2557670E-01   .2625690E-01   .2686116E-01
   .2774128E-01   .2837742E-01   .2848749E-01   .2825458E-01   .2802749E-01
   .2821597E-01   .2906554E-01   .3014146E-01   .3075106E-01   .3079035E-01
   .3060403E-01   .3052592E-01   .3065577E-01   .3089528E-01   .3112967E-01
   .3130205E-01   .3142470E-01   .3152925E-01   .3163298E-01   .3172324E-01
   .3175766E-01   .3149523E-01   .3084044E-01   .2999093E-01   .2924024E-01
   .2886538E-01   .2874455E-01   .2834922E-01   .2737056E-01   .2630247E-01
   .2568408E-01   .2525382E-01   .2449370E-01   .2353332E-01   .2257731E-01
   .2156025E-01   .2072071E-01   .2029637E-01   .1989750E-01   .1909072E-01
   .1813335E-01   .1725307E-01   .1626333E-01   .1507090E-01   .1373984E-01
   .1229970E-01   .1083779E-01   .9433917E-02   .8100720E-02   .6784337E-02
   .5464457E-02   .4196196E-02   .3272368E-02   .2591963E-02   .2105114E-02
   .1877050E-02   .1816388E-02   .1799279E-02   .1750575E-02   .1681359E-02
   .1575395E-02   .1076297E-02   .1015280E-03  -.7682497E-03  -.1173050E-02
  -.1600211E-02  -.2517525E-02  -.3885042E-02  -.5469151E-02  -.6980448E-02
  -.8180756E-02  -.8948943E-02  -.9701675E-02  -.1068927E-01  -.1166054E-01
  -.1265865E-01  -.1369865E-01  -.1453848E-01  -.1534877E-01  -.1623964E-01
  -.1687153E-01  -.1717494E-01  -.1765042E-01  -.1846536E-01  -.1914052E-01
  -.1935828E-01  -.1937528E-01  -.1981265E-01  -.2078441E-01  -.2167295E-01
  -.2216262E-01  -.2271528E-01  -.2362317E-01  -.2458851E-01  -.2566044E-01
  -.2675702E-01  -.2745002E-01  -.2764556E-01  -.2758971E-01  -.2753834E-01
  -.2757265E-01  -.2764134E-01  -.2766880E-01  -.2762141E-01  -.2752089E-01
  -.2740772E-01  -.2731031E-01  -.2723801E-01  -.2718379E-01  -.2714138E-01
  -.2710993E-01  -.2707554E-01  -.2686295E-01  -.2615339E-01  -.2518612E-01
  -.2459510E-01  -.2454722E-01  -.2458719E-01  -.2407863E-01  -.2309670E-01
  -.2213994E-01  -.2116570E-01  -.2018143E-01  -.1914985E-01  -.1795688E-01
  -.1686962E-01  -.1579181E-01  -.1484097E-01  -.1429265E-01  -.1388850E-01
  -.1329116E-01  -.1252085E-01  -.1171536E-01  -.1121921E-01  -.1109775E-01
  -.1114889E-01  -.1114680E-01  -.1080181E-01  -.9891308E-02  -.8818437E-02
  -.8227240E-02  -.8179979E-02  -.8122173E-02  -.7482329E-02  -.6526371E-02
  -.5937129E-02  -.5906579E-02  -.6125603E-02  -.6037234E-02  -.5536166E-02
  -.5099163E-02  -.5011280E-02  -.5186241E-02  -.5449449E-02  -.5918533E-02
  -.6518248E-02  -.6907204E-02  -.7039780E-02  -.7303230E-02  -.7828211E-02
  -.8523102E-02  -.9157257E-02  -.9481296E-02  -.9830320E-02  -.1058422E-01
  -.1142823E-01  -.1187199E-01  -.1191722E-01  -.1202319E-01  -.1210993E-01
  -.1187710E-01  -.1122182E-01  -.1014683E-01  -.9075567E-02  -.8172056E-02
  -.7156697E-02  -.5855043E-02  -.4401152E-02  -.3170609E-02  -.1998056E-02
  -.8448005E-03  -.5590448E-04   .7998265E-03   .1843424E-02   .2541134E-02
   .2696288E-02   .2547307E-02   .2443677E-02   .2833021E-02   .3669991E-02
   .3963286E-02   .3180078E-02   .2053752E-02   .1400616E-02   .1278952E-02
   .1051471E-02   .6072982E-03   .2000670E-03  -.2822624E-03  -.7061659E-03
  -.8338085E-03  -.6901734E-03  -.4645383E-03  -.2846911E-03  -.1755189E-03
  -.1019272E-03  -.4427868E-04   .2177890E-04   .1350828E-03   .3219780E-03
   .8525751E-03   .1783599E-02   .2581973E-02   .2841488E-02   .2683466E-02
   .2441548E-02   .2329752E-02   .2348854E-02   .2403003E-02   .2413308E-02
   .2371506E-02   .2357751E-02   .2642395E-02   .3208913E-02   .3891991E-02
   .4478389E-02   .4711899E-02   .4645016E-02   .4493215E-02   .4371259E-02
   .4054243E-02   .3544257E-02   .3145167E-02   .2973074E-02   .2745009E-02
   .2227147E-02   .1727489E-02   .1503240E-02   .1554302E-02   .1949430E-02
   .2837363E-02   .3866599E-02   .4487969E-02   .4873425E-02   .5591160E-02
   .6577208E-02   .7502908E-02   .8269591E-02   .8912303E-02   .9564318E-02
   .1001768E-01   .1022907E-01   .1049116E-01   .1082249E-01   .1094467E-01
   .1098307E-01   .1073233E-01   .1038622E-01   .1019096E-01   .1016401E-01
   .1019359E-01   .1017921E-01   .1010117E-01   .9991725E-02   .9889334E-02
   .9815817E-02   .9766286E-02   .9732200E-02   .9717703E-02   .9726794E-02
   .9723817E-02   .9719235E-02   .9732657E-02   .9640893E-02   .9234586E-02
   .8781171E-02   .8455048E-02   .8042490E-02   .7641119E-02   .7440748E-02
   .7419766E-02   .7441029E-02   .7290530E-02   .6746570E-02   .6140407E-02
   .5833030E-02   .5720146E-02   .5498996E-02   .5496181E-02   .5716346E-02
   .5774508E-02   .5344616E-02   .4767369E-02   .4465654E-02   .4466965E-02
   .4504119E-02   .4160976E-02   .3527733E-02   .2759338E-02   .2190226E-02
   .2048506E-02   .2188258E-02   .2342355E-02   .2377358E-02   .2313045E-02
   .2175566E-02   .1749785E-02   .1165459E-02   .4739783E-03  -.7745255E-04
  -.2559747E-03  -.1482183E-03  -.6444358E-04  -.5111623E-03  -.1532200E-02
  -.2414033E-02  -.2676384E-02  -.2487782E-02  -.2244641E-02  -.2179058E-02
  -.2279548E-02  -.2418546E-02  -.2481614E-02  -.2459972E-02  -.2428814E-02
  -.2436926E-02  -.2428029E-02  -.2068452E-02  -.1165578E-02  -.2213637E-03
   .2029656E-03   .1304923E-03  -.1175261E-03  -.3035277E-03  -.4370213E-03
  -.8024203E-03  -.1413778E-02  -.1952054E-02  -.2478762E-02  -.3028690E-02
  -.3395833E-02  -.3528463E-02  -.3541472E-02  -.3568715E-02  -.3632582E-02
  -.3664242E-02  -.3616018E-02  -.3458160E-02  -.2970831E-02  -.2243404E-02
  -.1707256E-02  -.1529040E-02  -.1587494E-02  -.1873292E-02  -.2328265E-02
  -.2575591E-02  -.2502432E-02  -.2269326E-02  -.2111022E-02  -.2306672E-02
  -.2857929E-02  -.3306996E-02  -.3631498E-02  -.4025384E-02  -.4291919E-02
  -.4349878E-02  -.4285693E-02  -.4241848E-02  -.4527581E-02  -.5386671E-02
  -.6426118E-02  -.7036673E-02  -.7340742E-02  -.7735044E-02  -.8117322E-02
  -.8544574E-02  -.9143781E-02  -.9876536E-02  -.1105511E-01  -.1252028E-01
  -.1365901E-01  -.1432501E-01  -.1455582E-01  -.1482714E-01  -.1562846E-01
  -.1666314E-01  -.1729814E-01  -.1740748E-01  -.1742503E-01  -.1778392E-01
  -.1806283E-01  -.1780692E-01  -.1753007E-01  -.1780759E-01  -.1850166E-01
  -.1914167E-01  -.1890731E-01  -.1789492E-01  -.1699559E-01  -.1667935E-01
  -.1680296E-01  -.1715055E-01  -.1746990E-01  -.1705357E-01  -.1581944E-01
  -.1444463E-01  -.1371183E-01  -.1368947E-01  -.1392273E-01  -.1382401E-01
  -.1298646E-01  -.1177779E-01  -.1097028E-01  -.1061846E-01  -.1008976E-01
  -.9240885E-02  -.8555087E-02  -.8268983E-02  -.7911136E-02  -.6931360E-02
  -.5934279E-02  -.5482280E-02  -.5516743E-02  -.5677779E-02  -.5538373E-02
  -.4756429E-02  -.3634038E-02  -.2901235E-02  -.2762316E-02  -.2575518E-02
  -.1661653E-02  -.4431185E-03   .7709935E-03   .1767588E-02   .2273103E-02
   .2666724E-02   .3548995E-02   .4448666E-02   .5032391E-02   .5678526E-02
   .6497704E-02   .7097664E-02   .7292482E-02   .7480106E-02   .8340065E-02
   .9430619E-02   .1017805E-01   .1083221E-01   .1166651E-01   .1236451E-01
   .1268176E-01   .1295066E-01   .1381713E-01   .1486822E-01   .1547809E-01
   .1581907E-01   .1663130E-01   .1762512E-01   .1822343E-01   .1832405E-01
   .1819120E-01   .1821478E-01   .1880210E-01   .1981823E-01   .2058532E-01
   .2076157E-01   .2055836E-01   .2034775E-01   .2031890E-01   .2043714E-01
   .2058119E-01   .2066919E-01   .2069255E-01   .2056816E-01   .2000850E-01
   .1909049E-01   .1838251E-01   .1805045E-01   .1756448E-01   .1668258E-01
   .1585727E-01   .1535089E-01   .1473929E-01   .1381798E-01   .1302309E-01
   .1267131E-01   .1266621E-01   .1274296E-01   .1274214E-01   .1266340E-01
   .1259137E-01   .1257455E-01   .1261049E-01   .1265820E-01   .1268820E-01
   .1269366E-01   .1268152E-01   .1266400E-01   .1264774E-01   .1263214E-01
   .1260477E-01   .1242123E-01   .1175304E-01   .1069785E-01   .9886243E-02
   .9629779E-02   .9722521E-02   .9757252E-02   .9213822E-02   .8087178E-02
   .7097436E-02   .6683715E-02   .6422306E-02   .6036146E-02   .5296367E-02
   .4148798E-02   .2880513E-02   .1981862E-02   .1368633E-02   .9024650E-03
   .2937318E-03  -.4983235E-03  -.1751613E-02  -.3089576E-02  -.4155948E-02
  -.4843959E-02  -.5459982E-02  -.6044655E-02  -.6475899E-02  -.7022245E-02
  -.7695553E-02  -.8472225E-02  -.9096876E-02  -.9339183E-02  -.9292181E-02
  -.9160382E-02  -.9053508E-02  -.8704957E-02  -.8148685E-02  -.7414824E-02
  -.6774666E-02  -.6497507E-02  -.6514873E-02  -.6618370E-02  -.6661206E-02
  -.6637510E-02  -.6867800E-02  -.7399150E-02  -.8078291E-02  -.8662478E-02
  -.8918093E-02  -.9137226E-02  -.9518507E-02  -.1012136E-01  -.1099284E-01
  -.1175808E-01  -.1204366E-01  -.1192852E-01  -.1168079E-01  -.1131875E-01
  -.1111312E-01  -.1104306E-01  -.1083542E-01  -.1060910E-01  -.1052080E-01
  -.1057367E-01  -.1068843E-01  -.1079616E-01  -.1087009E-01  -.1085911E-01
  -.1054800E-01  -.1002739E-01  -.9680770E-02  -.9614082E-02  -.9456436E-02
  -.8932996E-02  -.8190315E-02  -.7557362E-02  -.7725605E-02  -.8561212E-02
  -.9244594E-02  -.9371665E-02  -.9129165E-02  -.8869191E-02  -.8786703E-02
  -.9117597E-02  -.1020788E-01  -.1162033E-01  -.1305653E-01  -.1376603E-01
  -.1309564E-01  -.1196829E-01  -.1147539E-01  -.1171065E-01  -.1218938E-01
  -.1245762E-01  -.1243200E-01  -.1227308E-01  -.1214833E-01  -.1212824E-01
  -.1214034E-01  -.1210029E-01  -.1199550E-01  -.1161646E-01  -.1056071E-01
  -.9407936E-02  -.8706971E-02  -.8242140E-02  -.7900527E-02  -.7580887E-02
  -.7019279E-02  -.6438519E-02  -.6146877E-02  -.6140655E-02  -.6236995E-02
  -.6294450E-02  -.6292408E-02  -.6247593E-02  -.6215172E-02  -.6110472E-02
  -.5798317E-02  -.5613852E-02  -.5278414E-02  -.4647979E-02  -.4274335E-02
  -.4027362E-02  -.3796186E-02  -.3659503E-02  -.3617702E-02  -.3502891E-02
  -.3043990E-02  -.2389543E-02  -.1661164E-02  -.1145393E-02  -.9798368E-03
  -.1041082E-02  -.1108987E-02  -.1098877E-02  -.1023974E-02  -.9372104E-03
  -.6655448E-03   .2046705E-03   .1158247E-02   .1595177E-02   .1668234E-02
   .2068659E-02   .2989378E-02   .3963176E-02   .4896871E-02   .5848844E-02
   .6755514E-02   .7905416E-02   .8914551E-02   .9508726E-02   .1008476E-01
   .1100529E-01   .1191342E-01   .1238180E-01   .1244552E-01   .1244732E-01
   .1294418E-01   .1402254E-01   .1500635E-01   .1539175E-01   .1536570E-01
   .1558293E-01   .1616334E-01   .1702396E-01   .1778313E-01   .1817841E-01
   .1864531E-01   .1955125E-01   .2053333E-01   .2139052E-01   .2195873E-01
   .2220782E-01   .2251273E-01   .2268779E-01   .2291934E-01   .2326404E-01
   .2348703E-01   .2351743E-01   .2343947E-01   .2335506E-01   .2330249E-01
   .2326592E-01   .2321964E-01   .2314782E-01   .2312522E-01   .2339960E-01
   .2354526E-01   .2356848E-01   .2334772E-01   .2293874E-01   .2258500E-01
   .2209200E-01   .2156524E-01   .2127469E-01   .2116329E-01   .2080165E-01
   .2025683E-01   .1988798E-01   .1979684E-01   .1984883E-01   .1989055E-01
   .1979601E-01   .1925421E-01   .1821917E-01   .1723988E-01   .1644165E-01
   .1561382E-01   .1495981E-01   .1455272E-01   .1372125E-01   .1259336E-01
   .1150484E-01   .1051170E-01   .9883797E-02   .9741134E-02   .9866201E-02
   .9985871E-02   .1000653E-01   .9875386E-02   .9331567E-02   .8363942E-02
   .7517494E-02   .7160230E-02   .6817693E-02   .6044935E-02   .5186579E-02
   .4654670E-02   .4118968E-02   .3244815E-02   .2414262E-02   .2025501E-02
   .2021077E-02   .2128012E-02   .2153337E-02   .2075224E-02   .1964059E-02
   .1793155E-02   .1103466E-02   .1680180E-04  -.7210568E-03  -.8687263E-03
  -.7008374E-03  -.5675083E-03  -.6000758E-03  -.7401139E-03  -.9626385E-03
  -.1698699E-02  -.2816325E-02  -.3565024E-02  -.3748469E-02  -.3965111E-02
  -.4771118E-02  -.5807084E-02  -.6442430E-02  -.6615668E-02  -.6897396E-02
  -.7715456E-02  -.8691249E-02  -.9261800E-02  -.9287516E-02  -.8861568E-02
  -.8579842E-02  -.8830706E-02  -.9252083E-02  -.9373164E-02  -.8648818E-02
  -.7379586E-02  -.6523758E-02  -.6384159E-02  -.6631085E-02  -.6852978E-02
  -.6880782E-02  -.6811857E-02  -.7027626E-02  -.7589477E-02  -.8358737E-02
  -.9072440E-02  -.9409871E-02  -.9406858E-02  -.9321795E-02  -.9324711E-02
  -.9400979E-02  -.9474181E-02  -.9486432E-02  -.9443948E-02  -.9375267E-02
  -.9312855E-02  -.9200672E-02  -.8587735E-02  -.7469209E-02  -.6632606E-02
  -.6488777E-02  -.7217085E-02  -.8515264E-02  -.9411241E-02  -.9539857E-02
  -.9021439E-02  -.8111488E-02  -.7752619E-02  -.8544627E-02  -.9589344E-02
  -.1008832E-01  -.9997573E-02  -.9702018E-02  -.9524358E-02  -.9542805E-02
  -.9648940E-02  -.9741902E-02  -.9965156E-02  -.1018776E-01  -.1001063E-01
  -.9735185E-02  -.1007817E-01  -.1119593E-01  -.1212946E-01  -.1211410E-01
  -.1109311E-01  -.9896347E-02  -.9614840E-02  -.1056098E-01  -.1192098E-01
  -.1269273E-01  -.1262810E-01  -.1174007E-01  -.1037543E-01  -.9498920E-02
  -.9398756E-02  -.9705570E-02  -.1027342E-01  -.1102508E-01  -.1101175E-01
  -.1002834E-01  -.8934539E-02  -.8726654E-02  -.9201270E-02  -.9862158E-02
  -.1050429E-01  -.1065854E-01  -.1013475E-01  -.9529111E-02  -.9472880E-02
  -.1010512E-01  -.1097926E-01  -.1179082E-01  -.1219213E-01  -.1218826E-01
  -.1205852E-01  -.1200350E-01  -.1204553E-01  -.1210775E-01  -.1210517E-01
  -.1184933E-01  -.1106541E-01  -.1000979E-01  -.9325981E-02  -.9220285E-02
  -.9587101E-02  -.1007543E-01  -.9995671E-02  -.9189785E-02  -.7822441E-02
  -.6815519E-02  -.6809661E-02  -.7811312E-02  -.9098773E-02  -.9603220E-02
  -.8879605E-02  -.7583395E-02  -.6737047E-02  -.6683458E-02  -.7027015E-02
  -.7282715E-02  -.7028232E-02  -.5907884E-02  -.4532883E-02  -.3230161E-02
  -.1987275E-02  -.1470046E-02  -.1692133E-02  -.2065048E-02  -.2071222E-02
  -.1386833E-02  -.2598749E-03   .5517680E-03   .6989014E-03   .4557185E-03
   .3480525E-03   .6681791E-03   .8455462E-03   .8163809E-03   .1073075E-02
   .1516470E-02   .1813994E-02   .1893563E-02   .2012406E-02   .2743458E-02
   .4282510E-02   .5691292E-02   .6237054E-02   .5847612E-02   .4644022E-02
   .3670977E-02   .3919749E-02   .5137992E-02   .5952672E-02   .5285926E-02
   .3916756E-02   .2919018E-02   .2395371E-02   .2326566E-02   .2655079E-02
   .2717732E-02   .2398090E-02   .2165552E-02   .2469176E-02   .3028183E-02
   .3528205E-02   .4417814E-02   .5443499E-02   .5989285E-02   .6000512E-02
   .5698101E-02   .5131728E-02   .4612019E-02   .4356781E-02   .4021268E-02
   .3585990E-02   .3301589E-02   .3236162E-02   .3285716E-02   .3339645E-02
   .3356972E-02   .3352670E-02   .3363970E-02   .3477467E-02   .4020555E-02
   .5064273E-02   .6003340E-02   .6372293E-02   .6292770E-02   .6125634E-02
   .6101329E-02   .6213514E-02   .6347474E-02   .6411318E-02   .6398388E-02
   .6351177E-02   .6239853E-02   .5794027E-02   .5211760E-02   .4821102E-02
   .4397502E-02   .3959586E-02   .3712174E-02   .3666349E-02   .3630950E-02
   .3299715E-02   .3114641E-02   .3288533E-02   .3530888E-02   .3627676E-02
   .3569334E-02   .3464645E-02   .3401503E-02   .3398221E-02   .3419182E-02
   .3429097E-02   .3415049E-02   .3389213E-02   .3295145E-02   .2801500E-02
   .1803119E-02   .7598728E-03  -.3424312E-03  -.8513624E-03  -.2901075E-03
   .5503595E-03   .5294453E-03  -.5365856E-03  -.1697218E-02  -.2170495E-02
  -.1994004E-02  -.1572543E-02  -.9670686E-03  -.4259492E-03  -.1520241E-03
   .2001344E-03   .6508442E-03   .9512483E-03   .1032798E-02   .9899741E-03
   .8746403E-03   .5235975E-03   .3204425E-03   .7348023E-04  -.6441218E-03
  -.1457990E-02  -.1878274E-02  -.1892845E-02  -.1773053E-02  -.1771256E-02
  -.2122821E-02  -.2535352E-02  -.3039944E-02  -.3494241E-02  -.3492007E-02
  -.3248899E-02  -.3078616E-02  -.3043851E-02  -.2826031E-02  -.2389964E-02
  -.2074808E-02  -.2063423E-02  -.2448429E-02  -.2760197E-02  -.2610427E-02
  -.2275014E-02  -.2067025E-02  -.2065106E-02  -.2205642E-02  -.2647508E-02
  -.3509850E-02  -.4368765E-02  -.4853538E-02  -.5494049E-02  -.6446704E-02
  -.7139820E-02  -.7388010E-02  -.7626321E-02  -.8100439E-02  -.8764341E-02
  -.9513308E-02  -.9975416E-02  -.1006576E-01  -.9979064E-02  -.9921272E-02
  -.9962661E-02  -.1004687E-01  -.1010430E-01  -.1011082E-01  -.1008671E-01
  -.1005596E-01  -.1003881E-01  -.1003412E-01  -.1003252E-01  -.1002605E-01
  -.1001407E-01  -.1000199E-01  -.9992227E-02  -.9986347E-02  -.9924958E-02
  -.9390716E-02  -.8277368E-02  -.7398404E-02  -.7132815E-02  -.7026998E-02
  -.6414937E-02  -.5435599E-02  -.4720635E-02  -.4301350E-02  -.3884204E-02
  -.3409555E-02  -.2944775E-02  -.2785927E-02  -.2761333E-02  -.3010398E-02
  -.3309576E-02  -.3431873E-02  -.3392891E-02  -.3476205E-02  -.3768724E-02
  -.3941962E-02  -.4177563E-02  -.4235309E-02  -.3834689E-02  -.3335737E-02
  -.3082202E-02  -.2915626E-02  -.2515007E-02  -.2092660E-02  -.1863235E-02
  -.1632400E-02  -.9405255E-03   .6996963E-04   .7761346E-03   .9757636E-03
   .1239797E-02   .2164257E-02   .2987857E-02   .3141309E-02   .3149815E-02
   .3267636E-02   .3443205E-02   .3726584E-02   .4261943E-02   .4898211E-02
   .5612883E-02   .6272531E-02   .7033767E-02   .7957351E-02   .8781002E-02
   .9617532E-02   .1054078E-01   .1120310E-01   .1153697E-01   .1204930E-01
   .1293443E-01   .1371064E-01   .1412908E-01   .1463209E-01   .1545285E-01
   .1604260E-01   .1596411E-01   .1584631E-01   .1601316E-01   .1639142E-01
   .1697971E-01   .1748226E-01   .1766787E-01   .1762459E-01   .1767174E-01
   .1814666E-01   .1872159E-01   .1900401E-01   .1897602E-01   .1883985E-01
   .1876259E-01   .1877773E-01   .1882825E-01   .1885322E-01   .1883159E-01
   .1878466E-01   .1874271E-01   .1877254E-01   .1917019E-01   .1974521E-01
   .2015386E-01   .2059335E-01   .2103970E-01   .2126838E-01   .2127922E-01
   .2123067E-01   .2122937E-01   .2127880E-01   .2133482E-01   .2136485E-01
   .2135960E-01   .2131840E-01   .2126453E-01   .2123961E-01   .2124421E-01
   .2125920E-01   .2126372E-01   .2125341E-01   .2123805E-01   .2121851E-01
   .2118200E-01   .2114939E-01   .2112892E-01   .2110219E-01   .2107453E-01
   .2105654E-01   .2104711E-01   .2103729E-01   .2102825E-01   .2101799E-01
   .2100258E-01   .2089084E-01   .2025053E-01   .1952156E-01   .1968833E-01
   .2054114E-01   .2115350E-01   .2071749E-01   .1940043E-01   .1790459E-01
   .1662116E-01   .1609940E-01   .1643586E-01   .1699358E-01   .1690249E-01
   .1593550E-01   .1447573E-01   .1352944E-01   .1341084E-01   .1371394E-01
   .1393608E-01   .1384168E-01   .1314417E-01   .1188408E-01   .1093993E-01
   .1071556E-01   .1093895E-01   .1113969E-01   .1087906E-01   .9952709E-02
   .8833670E-02   .7948433E-02   .7103929E-02   .6307546E-02   .5870274E-02
   .5798237E-02   .5858605E-02   .5685660E-02   .5062416E-02   .4251451E-02
   .3504843E-02   .3118414E-02   .3077582E-02   .3152242E-02   .2989212E-02
   .2235117E-02   .1150591E-02   .4081627E-03   .2580621E-03   .4382965E-03
   .6021987E-03   .5971423E-03   .4655125E-03   .1429534E-03  -.6411801E-03
  -.1674571E-02  -.2341367E-02  -.2492440E-02  -.2726339E-02  -.3653573E-02
  -.4706408E-02  -.5471681E-02  -.6254162E-02  -.7159133E-02  -.7823400E-02
  -.8263397E-02  -.8950607E-02  -.9762640E-02  -.1020944E-01  -.1052898E-01
  -.1080458E-01  -.1115525E-01  -.1175798E-01  -.1248193E-01  -.1325498E-01
  -.1376001E-01  -.1391760E-01  -.1407372E-01  -.1475696E-01  -.1583458E-01
  -.1662085E-01  -.1681479E-01  -.1666197E-01  -.1672312E-01  -.1746477E-01
  -.1861736E-01  -.1939906E-01  -.1953244E-01  -.1934714E-01  -.1937436E-01
  -.1989553E-01  -.2049398E-01  -.2090565E-01  -.2133713E-01  -.2173260E-01
  -.2194303E-01  -.2197107E-01  -.2194891E-01  -.2195571E-01  -.2203077E-01
  -.2224970E-01  -.2277995E-01  -.2344519E-01  -.2404967E-01  -.2421941E-01
  -.2432537E-01  -.2454844E-01  -.2475468E-01  -.2483362E-01  -.2480650E-01
  -.2474343E-01  -.2467701E-01  -.2449048E-01  -.2385303E-01  -.2292786E-01
  -.2243975E-01  -.2223764E-01  -.2207833E-01  -.2193059E-01  -.2168606E-01
  -.2101541E-01  -.1998258E-01  -.1920041E-01  -.1897433E-01  -.1910934E-01
  -.1914035E-01  -.1865045E-01  -.1785101E-01  -.1700736E-01  -.1646697E-01
  -.1635146E-01  -.1646220E-01  -.1657211E-01  -.1656911E-01  -.1647257E-01
  -.1636030E-01  -.1615199E-01  -.1551795E-01  -.1463507E-01  -.1430102E-01
  -.1444886E-01  -.1449533E-01  -.1471283E-01  -.1536291E-01  -.1602798E-01
  -.1632055E-01  -.1628064E-01  -.1616143E-01  -.1613505E-01  -.1620840E-01
  -.1629485E-01  -.1620483E-01  -.1550294E-01  -.1512256E-01  -.1524766E-01
  -.1563547E-01  -.1563443E-01  -.1485355E-01  -.1390605E-01  -.1344365E-01
  -.1348686E-01  -.1370317E-01  -.1380807E-01  -.1374610E-01  -.1354656E-01
  -.1309038E-01  -.1284074E-01  -.1260835E-01  -.1194939E-01  -.1120443E-01
  -.1082729E-01  -.1082413E-01  -.1095969E-01  -.1102891E-01  -.1099426E-01
  -.1091256E-01  -.1084212E-01  -.1061629E-01  -.9592628E-02  -.9188509E-02
  -.1000365E-01  -.1124066E-01  -.1173816E-01  -.1135037E-01  -.1078351E-01
  -.1055039E-01  -.1067016E-01  -.1090203E-01  -.1104294E-01  -.1103545E-01
  -.1082304E-01  -.9931198E-02  -.8803121E-02  -.8211573E-02  -.8236462E-02
  -.8488347E-02  -.8562036E-02  -.8093271E-02  -.7074948E-02  -.6091528E-02
  -.5671465E-02  -.5749141E-02  -.5909935E-02  -.5686441E-02  -.5333652E-02
  -.5048620E-02  -.4738216E-02  -.4590159E-02  -.4857015E-02  -.5079929E-02
  -.4594539E-02  -.3721457E-02  -.3152754E-02  -.3088886E-02  -.3285552E-02
  -.3436236E-02  -.3378006E-02  -.2888533E-02  -.1894515E-02  -.9141092E-03
  -.4773259E-03  -.5388643E-03  -.7331977E-03  -.7974580E-03  -.7067585E-03
  -.5168030E-03  -.4793896E-04   .8664592E-03   .1791259E-02   .2238347E-02
   .2223763E-02   .2117992E-02   .2403996E-02   .3072733E-02   .3883597E-02
   .4547376E-02   .4809271E-02   .4747732E-02   .4622130E-02   .4640501E-02
   .5061243E-02   .5766047E-02   .6521111E-02   .7109743E-02   .7325266E-02
   .7272963E-02   .7175844E-02   .7170009E-02   .7242919E-02   .7362395E-02
   .7722669E-02   .8244321E-02   .8579420E-02   .8620635E-02   .8516809E-02
   .8437090E-02   .8444770E-02   .8504604E-02   .8609399E-02   .8977112E-02
   .9494145E-02   .9569047E-02   .9414717E-02   .9520534E-02   .9784130E-02
   .9983467E-02   .1003912E-01   .1000578E-01   .9966353E-02   .9962413E-02
   .9983847E-02   .1000333E-01   .1000129E-01   .9985397E-02   .9964009E-02
   .1000182E-01   .1037400E-01   .1121758E-01   .1185424E-01   .1207880E-01
   .1223722E-01   .1237700E-01   .1247023E-01   .1251845E-01   .1254348E-01
   .1255792E-01   .1257517E-01   .1259519E-01   .1261663E-01   .1263816E-01
   .1266100E-01   .1267972E-01   .1269537E-01   .1270639E-01   .1271057E-01
   .1270885E-01   .1270126E-01   .1269244E-01   .1267893E-01   .1266157E-01
   .1264030E-01   .1261993E-01   .1260095E-01   .1258615E-01   .1257155E-01
   .1255851E-01   .1255511E-01   .1256014E-01   .1257409E-01   .1259008E-01
   .1260597E-01   .1261903E-01   .1262900E-01   .1263449E-01   .1263634E-01
   .1265807E-01   .1290586E-01   .1340505E-01   .1358750E-01   .1343193E-01
   .1369776E-01   .1440133E-01   .1473982E-01   .1436586E-01   .1380975E-01
   .1353479E-01   .1358055E-01   .1376910E-01   .1412001E-01   .1464303E-01
   .1501139E-01   .1512669E-01   .1534090E-01   .1589815E-01   .1662237E-01
   .1713409E-01   .1725488E-01   .1740635E-01   .1761485E-01   .1776384E-01
   .1781822E-01   .1781153E-01   .1779384E-01   .1774018E-01   .1741254E-01
   .1682269E-01   .1609814E-01   .1544814E-01   .1514867E-01   .1516340E-01
   .1526827E-01   .1530523E-01   .1526187E-01   .1519469E-01   .1511896E-01
   .1480428E-01   .1430163E-01   .1396590E-01   .1386921E-01   .1368684E-01
   .1351341E-01   .1336263E-01   .1308032E-01   .1284325E-01   .1276961E-01
   .1281204E-01   .1287470E-01   .1289278E-01   .1281000E-01   .1237287E-01
   .1176921E-01   .1137506E-01   .1103087E-01   .1061931E-01   .1033564E-01
   .1025577E-01   .1028104E-01   .1022738E-01   .9758368E-02   .9041214E-02
   .8250665E-02   .7659791E-02   .7450050E-02   .7480039E-02   .7456851E-02
   .6999505E-02   .6328576E-02   .5834531E-02   .5333290E-02   .4851591E-02
   .4599415E-02   .4569860E-02   .4617201E-02   .4625949E-02   .4579965E-02
   .4453973E-02   .4078723E-02   .3858044E-02   .3626477E-02   .2973486E-02
   .2308051E-02   .2343824E-02   .2891529E-02   .3328896E-02   .3392472E-02
   .3102382E-02   .2495275E-02   .1961566E-02   .1794939E-02   .1901484E-02
   .2045846E-02   .2087549E-02   .2036995E-02   .1971373E-02   .1947749E-02
   .1983425E-02   .2161228E-02   .2645160E-02   .3035377E-02   .2808964E-02
   .2252214E-02   .1743877E-02   .1100315E-02   .3753853E-03   .3189991E-03
   .1097297E-02   .1686998E-02   .1061907E-02  -.1511376E-03  -.1038903E-02
  -.1572222E-02  -.1820607E-02  -.1860565E-02  -.1965072E-02  -.2438120E-02
  -.3024520E-02  -.3532758E-02  -.4248842E-02  -.5155175E-02  -.5774142E-02
  -.5942325E-02  -.6063359E-02  -.6721794E-02  -.7782017E-02  -.8556429E-02
  -.8790913E-02  -.9053395E-02  -.9974019E-02  -.1097134E-01  -.1145285E-01
  -.1143321E-01  -.1125434E-01  -.1117366E-01  -.1123315E-01  -.1134728E-01
  -.1144173E-01  -.1145670E-01  -.1140314E-01  -.1136941E-01  -.1137529E-01
  -.1140023E-01  -.1144961E-01  -.1171326E-01  -.1226763E-01  -.1271560E-01
  -.1284309E-01  -.1279133E-01  -.1293943E-01  -.1345356E-01  -.1395592E-01
  -.1418641E-01  -.1416955E-01  -.1406149E-01  -.1400322E-01  -.1404843E-01
  -.1413529E-01  -.1418462E-01  -.1418744E-01  -.1419041E-01  -.1443122E-01
  -.1497300E-01  -.1541430E-01  -.1555028E-01  -.1547990E-01  -.1534592E-01
  -.1506118E-01  -.1492233E-01  -.1517373E-01  -.1551131E-01  -.1561995E-01
  -.1525093E-01  -.1461427E-01  -.1418495E-01  -.1411204E-01  -.1425929E-01
  -.1439117E-01  -.1441227E-01  -.1436823E-01  -.1430562E-01  -.1428574E-01
  -.1432153E-01  -.1437161E-01  -.1439517E-01  -.1439245E-01  -.1437520E-01
  -.1435807E-01  -.1435526E-01  -.1438315E-01  -.1442711E-01  -.1444978E-01
  -.1444451E-01  -.1442906E-01  -.1441958E-01  -.1443113E-01  -.1451801E-01
  -.1493599E-01  -.1541419E-01  -.1531762E-01  -.1480819E-01  -.1443445E-01
  -.1438752E-01  -.1452617E-01  -.1464834E-01  -.1466527E-01  -.1460398E-01
  -.1454776E-01  -.1455890E-01  -.1460868E-01  -.1451929E-01  -.1406583E-01
  -.1352469E-01  -.1312398E-01  -.1265344E-01  -.1224654E-01  -.1207226E-01
  -.1195901E-01  -.1155331E-01  -.1105174E-01  -.1077517E-01  -.1065946E-01
  -.1030331E-01  -.9836298E-02  -.9579798E-02  -.9594675E-02  -.9716292E-02
  -.9783323E-02  -.9756737E-02  -.9690779E-02  -.9638771E-02  -.9606159E-02
  -.9416007E-02  -.8917348E-02  -.8467733E-02  -.8302180E-02  -.8321138E-02
  -.8145133E-02  -.7617308E-02  -.7140666E-02  -.6969280E-02  -.7031255E-02
  -.7145970E-02  -.7190302E-02  -.7173097E-02  -.7111416E-02  -.6764995E-02
  -.6253065E-02  -.6177677E-02  -.6307752E-02  -.5916028E-02  -.5135495E-02
  -.4569563E-02  -.4424521E-02  -.4527619E-02  -.4622550E-02  -.4536858E-02
  -.4047191E-02  -.3389537E-02  -.2876538E-02  -.2039766E-02  -.1139270E-02
  -.9424611E-03  -.1039386E-02  -.9542764E-03  -.7377817E-03  -.4956709E-03
  -.3176525E-04   .4897400E-03   .7563974E-03   .7519721E-03   .6613177E-03
   .7482255E-03   .1245476E-02   .1832066E-02   .2249163E-02   .2689543E-02
   .3077524E-02   .3272145E-02   .3476683E-02   .3985015E-02   .4690888E-02
   .5450423E-02   .5911995E-02   .5989522E-02   .5904554E-02   .6215736E-02
   .7280379E-02   .8315275E-02   .8741655E-02   .8645946E-02   .8422447E-02
   .8370581E-02   .8746264E-02   .9696243E-02   .1076010E-01   .1125332E-01
   .1073152E-01   .9484016E-02   .9046694E-02   .1004036E-01   .1173919E-01
   .1331435E-01   .1367065E-01   .1269797E-01   .1144588E-01   .1088389E-01
   .1105314E-01   .1147422E-01   .1199281E-01   .1247421E-01   .1262044E-01
   .1220575E-01   .1145358E-01   .1072559E-01   .1065502E-01   .1149053E-01
   .1239968E-01   .1238736E-01   .1168608E-01   .1110876E-01   .1098489E-01
   .1115630E-01   .1134699E-01   .1140218E-01   .1134282E-01   .1128806E-01
   .1143334E-01   .1196901E-01   .1257077E-01   .1304838E-01   .1354940E-01
   .1392190E-01   .1405966E-01   .1404982E-01   .1402198E-01   .1404631E-01
   .1409768E-01   .1410620E-01   .1385241E-01   .1329369E-01   .1284753E-01
   .1272209E-01   .1280794E-01   .1290942E-01   .1294219E-01   .1291542E-01
   .1286408E-01   .1277187E-01   .1239530E-01   .1180665E-01   .1140041E-01
   .1124083E-01   .1091323E-01   .1043034E-01   .1009805E-01   .9942751E-02
   .9585340E-02   .9086567E-02   .8776488E-02   .8728546E-02   .8811626E-02
   .8867230E-02   .8730934E-02   .8227239E-02   .7683053E-02   .7440209E-02
   .7484415E-02   .7594874E-02   .7452865E-02   .6897647E-02   .6346512E-02
   .6120802E-02   .6173928E-02   .6289733E-02   .6329929E-02   .6276434E-02
   .6200046E-02   .6154645E-02   .6151968E-02   .6162466E-02   .6147323E-02
   .6103015E-02   .6060725E-02   .6039190E-02   .6030317E-02   .6022538E-02
   .6004357E-02   .5979589E-02   .5956426E-02   .5935985E-02   .5920866E-02
   .5912357E-02   .5987843E-02   .6422973E-02   .6990022E-02   .7405466E-02
   .7840062E-02   .8223571E-02   .8404728E-02   .8415614E-02   .8384310E-02
   .8407104E-02   .8647271E-02   .9211892E-02   .9701948E-02   .9690862E-02
   .9115692E-02   .8536485E-02   .8339186E-02   .8456036E-02   .8630484E-02
   .8663438E-02   .8351135E-02   .7727647E-02   .7228351E-02   .6842456E-02
   .6377526E-02   .6028863E-02   .5809546E-02   .5183288E-02   .4366294E-02
   .3790394E-02   .3380729E-02   .2903404E-02   .2300186E-02   .1584540E-02
   .9023838E-03   .4980665E-03   .1270452E-03  -.3921309E-03  -.1085175E-02
  -.1778851E-02  -.2143506E-02  -.2176755E-02  -.2153036E-02  -.2517690E-02
  -.3097868E-02  -.3444148E-02  -.3465246E-02  -.3422036E-02  -.3786836E-02
  -.4400552E-02  -.4804383E-02  -.4873263E-02  -.4770558E-02  -.4688754E-02
  -.4696096E-02  -.4762349E-02  -.4830450E-02  -.4985655E-02  -.5436100E-02
  -.5930681E-02  -.6167887E-02  -.6156564E-02  -.6074954E-02  -.6170081E-02
  -.6571141E-02  -.6813498E-02  -.6891807E-02  -.6668313E-02  -.6428925E-02
  -.6680712E-02  -.7206257E-02  -.7552585E-02  -.7597063E-02  -.7484928E-02
  -.7395687E-02  -.7398071E-02  -.7471762E-02  -.7715578E-02  -.8092384E-02
  -.8246666E-02  -.8461026E-02  -.8729340E-02  -.9070322E-02  -.9592463E-02
  -.9859028E-02  -.9691578E-02  -.9675175E-02  -.9885913E-02  -.1010078E-01
  -.1018089E-01  -.1014385E-01  -.1007367E-01  -.1000506E-01  -.9722168E-02
  -.8983657E-02  -.8526605E-02  -.9063012E-02  -.9892716E-02  -.1028408E-01
  -.9962764E-02  -.9211248E-02  -.8902278E-02  -.9354134E-02  -.9972857E-02
  -.1025874E-01  -.1013034E-01  -.9543310E-02  -.8528113E-02  -.7600481E-02
  -.7229901E-02  -.7371739E-02  -.7919386E-02  -.8500878E-02  -.8390824E-02
  -.7362853E-02  -.5921249E-02  -.4868224E-02  -.4595697E-02  -.4854186E-02
  -.5350590E-02  -.5484317E-02  -.4662249E-02  -.3242330E-02  -.2138042E-02
  -.1889649E-02  -.2531236E-02  -.3699599E-02  -.4670507E-02  -.4868462E-02
  -.3984067E-02  -.2611285E-02  -.1859497E-02  -.2248858E-02  -.3510343E-02
  -.4739179E-02  -.5436407E-02  -.5369869E-02  -.4445062E-02  -.3109060E-02
  -.2228276E-02  -.2683523E-02  -.4125818E-02  -.5672069E-02  -.6221192E-02
  -.5505295E-02  -.4578437E-02  -.4220219E-02  -.4516537E-02  -.5524122E-02
  -.6764388E-02  -.7332347E-02  -.6640874E-02  -.5257487E-02  -.4351950E-02
  -.4283408E-02  -.4694220E-02  -.5350001E-02  -.6124505E-02  -.6191099E-02
  -.5379439E-02  -.4576492E-02  -.4332054E-02  -.4583689E-02  -.5239854E-02
  -.6215355E-02  -.6956265E-02  -.6606866E-02  -.5440002E-02  -.4615139E-02
  -.4863585E-02  -.6043152E-02  -.7136623E-02  -.6936460E-02  -.5678580E-02
  -.4622055E-02  -.4323900E-02  -.4315359E-02  -.4417948E-02  -.4677135E-02
  -.4757206E-02  -.4067847E-02  -.2849035E-02  -.2021267E-02  -.1891246E-02
  -.2143204E-02  -.2408601E-02  -.2750847E-02  -.3168944E-02  -.3423916E-02
  -.3517657E-02  -.3774136E-02  -.3982031E-02  -.3828264E-02  -.3557718E-02
  -.3422082E-02  -.3444516E-02  -.3479152E-02  -.3219008E-02  -.2658520E-02
  -.2218577E-02  -.2097620E-02  -.2176317E-02  -.2237833E-02  -.1981772E-02
  -.1345310E-02  -.5700995E-03   .1571600E-03   .5271075E-03   .5684701E-03
   .7169389E-03   .1185608E-02   .1436055E-02   .1328096E-02   .1158236E-02
   .1066026E-02   .1351202E-02   .1726277E-02   .1907483E-02   .1873140E-02
   .1738423E-02   .1421113E-02   .8925797E-03   .4906926E-03   .3790882E-03
   .4687179E-03   .5510806E-03   .5364720E-03   .4657463E-03   .3875594E-03
   .3457306E-03   .3472597E-03   .3844906E-03   .4358177E-03   .4644209E-03
   .4437607E-03   .3888079E-03   .3610753E-03   .3847692E-03   .4045988E-03
   .3817512E-03   .3435924E-03   .3228835E-03   .3413035E-03   .3902975E-03
   .4260702E-03   .4160549E-03   .3822464E-03   .3803243E-03   .4047229E-03
   .4321838E-03   .4477603E-03   .4514766E-03   .4521306E-03   .4533922E-03
   .4320272E-03   .1931690E-03  -.1039694E-03   .1769244E-04   .3503097E-03
   .5642524E-03   .5753083E-03   .4777514E-03   .4002692E-03   .3930489E-03
   .4301340E-03   .4675352E-03   .4763552E-03   .4642741E-03   .4469191E-03
   .4437332E-03   .4563446E-03   .5269687E-03   .8835008E-03   .1466445E-02
   .1862373E-02   .1927675E-02   .1838965E-02   .1777305E-02   .1807925E-02
   .1902050E-02   .1979382E-02   .1997754E-02   .1976437E-02   .1944403E-02
   .1908894E-02   .1875583E-02   .1876942E-02   .1904743E-02   .1876622E-02
   .1518275E-02   .9213996E-03   .5632835E-03   .8295884E-03   .1553129E-02
   .2333140E-02   .2570426E-02   .1863723E-02   .8140110E-03   .2308797E-03
   .2902756E-03   .8270676E-03   .1177549E-02   .8896816E-03   .4459367E-04
  -.1116551E-02  -.2013101E-02  -.1976502E-02  -.9816600E-03   .8157291E-04
   .1512128E-03  -.9173349E-03  -.2229939E-02  -.3162496E-02  -.3546921E-02
  -.3221230E-02  -.2549115E-02  -.2148484E-02  -.2220206E-02  -.2722213E-02
  -.3128960E-02  -.3272961E-02  -.3360894E-02  -.3092049E-02  -.2211725E-02
  -.9558381E-03   .1212362E-05  -.9532022E-05  -.7194917E-03  -.1301808E-02
  -.1340406E-02  -.7555405E-03   .4929615E-04   .4848636E-03   .4579573E-03
   .2435971E-03   .1129143E-03   .1889825E-03   .6303585E-03   .1309230E-02
   .2029271E-02   .2613285E-02   .2861957E-02   .2872260E-02   .2843264E-02
   .2880616E-02   .2967840E-02   .3092113E-02   .3414317E-02   .3681193E-02
   .3892256E-02   .4502615E-02   .5312410E-02   .5811518E-02   .5889847E-02
   .5777039E-02   .5728320E-02   .5843287E-02   .6290605E-02   .6928305E-02
   .7331804E-02   .7388308E-02   .7325165E-02   .7541599E-02   .7780052E-02
   .7664322E-02   .7451669E-02   .7653654E-02   .8243946E-02   .8716714E-02
   .8840747E-02   .8738008E-02   .8624304E-02   .8614091E-02   .8680419E-02
   .8754430E-02   .8786627E-02   .8779590E-02   .8765461E-02   .8764899E-02
   .8775257E-02   .8740099E-02   .8417300E-02   .7879327E-02   .7509959E-02
   .7390407E-02   .7124468E-02   .6617656E-02   .6215563E-02   .6085652E-02
   .6135454E-02   .6205361E-02   .6209952E-02   .6161986E-02   .6108991E-02
   .6082425E-02   .6083103E-02   .6093599E-02   .6092006E-02   .6058902E-02
   .6007012E-02   .5971186E-02   .5959725E-02   .5962346E-02   .5965978E-02
   .5965782E-02   .5961843E-02   .5956858E-02   .5955422E-02   .5956246E-02
   .5956827E-02   .5956266E-02   .5949532E-02   .5942676E-02   .5933632E-02
   .5903348E-02   .5854447E-02   .5816604E-02   .5801704E-02   .5801070E-02
   .5797738E-02   .5788743E-02   .5771437E-02   .5752576E-02   .5738696E-02
   .5729338E-02   .5720560E-02   .5714823E-02   .5707822E-02   .5701841E-02
   .5693406E-02   .5684387E-02   .5679037E-02   .5674102E-02   .5666711E-02
   .5660317E-02   .5653000E-02   .5643883E-02   .5635764E-02   .5624218E-02
   .5614008E-02   .5604552E-02   .5590940E-02   .5577230E-02   .5562840E-02
   .5546603E-02   .5530755E-02   .5512769E-02   .5495219E-02   .5477912E-02
   .5460800E-02   .5443737E-02   .5428570E-02   .5415201E-02   .5400762E-02
   .5356575E-02   .5064249E-02   .4488057E-02   .4027598E-02   .3643745E-02
   .3148970E-02   .2773038E-02   .2611028E-02   .2372656E-02   .1897130E-02
   .1716552E-02   .2091263E-02   .2559202E-02   .2755816E-02   .2693014E-02
   .2587923E-02   .2775593E-02   .3139271E-02   .3365000E-02   .3684931E-02
   .4167599E-02   .4590919E-02   .4679721E-02   .4830012E-02   .5072950E-02
   .5235684E-02   .5097734E-02   .4563539E-02   .4038968E-02   .3649184E-02
   .3170011E-02   .2773810E-02   .2613113E-02   .2592404E-02   .2269991E-02
   .1454262E-02   .9939486E-03   .8901700E-03   .6428540E-03   .2940948E-03
  -.1306861E-03  -.8943570E-03  -.1657930E-02  -.1572967E-02  -.8670460E-03
  -.7593831E-03  -.1525338E-02  -.2369745E-02  -.2709658E-02  -.2570352E-02
  -.2128223E-02  -.1508094E-02  -.1262386E-02  -.1690958E-02  -.2276143E-02
  -.2557338E-02  -.2670789E-02  -.2978525E-02  -.3188267E-02  -.3268714E-02
  -.3878591E-02  -.4772772E-02  -.5755710E-02  -.6713567E-02  -.7275664E-02
  -.7121581E-02  -.6098352E-02  -.5259344E-02  -.5756306E-02  -.6925216E-02
  -.7676103E-02  -.7835100E-02  -.7870926E-02  -.7713099E-02  -.7559502E-02
  -.7888381E-02  -.8463747E-02  -.8836229E-02  -.9013257E-02  -.9383988E-02
  -.9839293E-02  -.1010377E-01  -.1014159E-01  -.1008105E-01  -.1003288E-01
  -.1001394E-01  -.1001502E-01  -.1002321E-01  -.1002402E-01  -.1001724E-01
  -.1001185E-01  -.1001290E-01  -.1001883E-01  -.1003042E-01  -.1003990E-01
  -.1004909E-01  -.1004722E-01  -.1002010E-01  -.9999614E-02  -.1012565E-01
  -.1049109E-01  -.1056083E-01  -.1027543E-01  -.9979951E-02  -.9856504E-02
  -.9884236E-02  -.9960929E-02  -.1000085E-01  -.9992041E-02  -.9962491E-02
  -.9948664E-02  -.9951303E-02  -.9942069E-02  -.9924499E-02  -.9910614E-02
  -.9884895E-02  -.9861457E-02  -.9868731E-02  -.1001835E-01  -.1050034E-01
  -.1103056E-01  -.1128243E-01  -.1125975E-01  -.1114526E-01  -.1097114E-01
  -.1064566E-01  -.1051098E-01  -.1033874E-01  -.1006846E-01  -.9873958E-02
  -.9815582E-02  -.9834766E-02  -.9857499E-02  -.9850988E-02  -.9825811E-02
  -.9801813E-02  -.9780939E-02  -.9672754E-02  -.9314970E-02  -.9200160E-02
  -.9364821E-02  -.9237934E-02  -.8834434E-02  -.8579138E-02  -.8829784E-02
  -.9031191E-02  -.8860192E-02  -.8574141E-02  -.8407371E-02  -.8332567E-02
  -.7983592E-02  -.7471298E-02  -.7148378E-02  -.7094475E-02  -.7172030E-02
  -.7225305E-02  -.7203847E-02  -.7145180E-02  -.7106541E-02  -.7128610E-02
  -.7187087E-02  -.7228866E-02  -.7237448E-02  -.7226100E-02  -.7217912E-02
  -.7222118E-02  -.7241830E-02  -.7342498E-02  -.7871252E-02  -.8818779E-02
  -.9370620E-02  -.9558975E-02  -.9701251E-02  -.9827340E-02  -.9917508E-02
  -.9972241E-02  -.1000394E-01  -.1002241E-01  -.1003140E-01  -.1004550E-01
  -.1007686E-01  -.1009961E-01  -.1011764E-01  -.1011686E-01  -.1009951E-01
  -.1008188E-01  -.1006282E-01  -.1006754E-01  -.1009485E-01  -.1009266E-01
  -.1006322E-01  -.1003469E-01  -.1002667E-01  -.1003614E-01  -.1004577E-01
  -.9979428E-02  -.9607098E-02  -.9348705E-02  -.9147376E-02  -.8838624E-02
  -.8321738E-02  -.7700098E-02  -.7316347E-02  -.7252236E-02  -.7340413E-02
  -.7407299E-02  -.7396461E-02  -.7331572E-02  -.7207869E-02  -.6820180E-02
  -.6255997E-02  -.5825485E-02  -.5403965E-02  -.4935247E-02  -.4635536E-02
  -.4557962E-02  -.4576677E-02  -.4573957E-02  -.4534102E-02  -.4489871E-02
  -.4467806E-02  -.4471405E-02  -.4487059E-02  -.4499407E-02  -.4505047E-02
  -.4506508E-02  -.4451777E-02  -.4086739E-02  -.3443959E-02  -.2709700E-02
  -.2094528E-02  -.1835843E-02  -.1912449E-02  -.2338154E-02  -.2839783E-02
  -.2698046E-02  -.1442523E-02   .1925256E-03   .1083495E-02   .9750010E-03
  -.7909790E-04  -.1315863E-02  -.1306144E-02  -.5441154E-04   .1358891E-02
   .1898332E-02   .1429853E-02   .7557660E-03   .4766611E-03   .6224809E-03
   .9982130E-03   .1836491E-02   .2918098E-02   .3497008E-02   .3205849E-02
   .2263741E-02   .1791277E-02   .2429488E-02   .3347774E-02   .3828595E-02
   .3997746E-02   .4031186E-02   .3765886E-02   .3550748E-02   .4027778E-02
   .5302063E-02   .6841647E-02   .8227730E-02   .8865650E-02   .8632431E-02
   .8144120E-02   .8194766E-02   .8631403E-02   .9010004E-02   .9120582E-02
   .9032163E-02   .8916720E-02   .8882595E-02   .8924444E-02   .8984277E-02
   .9017718E-02   .9019660E-02   .9008333E-02   .9003373E-02   .9028694E-02
   .9092709E-02   .9347068E-02   .9682796E-02   .9851899E-02   .1009513E-01
   .1033082E-01   .1046935E-01   .1072143E-01   .1128585E-01   .1178363E-01
   .1196625E-01   .1191478E-01   .1182612E-01   .1181245E-01   .1188458E-01
   .1199040E-01   .1205908E-01   .1206754E-01   .1206014E-01   .1223965E-01
   .1277540E-01   .1332480E-01   .1374725E-01   .1423669E-01   .1464737E-01
   .1482970E-01   .1483259E-01   .1479050E-01   .1478896E-01   .1484500E-01
   .1509557E-01   .1566700E-01   .1617441E-01   .1634683E-01   .1628226E-01
   .1634273E-01   .1667104E-01   .1687395E-01   .1711477E-01   .1734714E-01
   .1732568E-01   .1685022E-01   .1628496E-01   .1602001E-01   .1607085E-01
   .1620106E-01   .1625917E-01   .1622255E-01   .1614377E-01   .1608038E-01
   .1604483E-01   .1590175E-01   .1540281E-01   .1483677E-01   .1454881E-01
   .1454862E-01   .1463929E-01   .1466091E-01   .1446337E-01   .1378295E-01
   .1275414E-01   .1198540E-01   .1177675E-01   .1190269E-01   .1190424E-01
   .1138842E-01   .1058380E-01   .9748531E-02   .9219025E-02   .9110193E-02
   .9217539E-02   .9301046E-02   .9268743E-02   .9174492E-02   .9103961E-02
   .9090689E-02   .9116572E-02   .9136402E-02   .9118682E-02   .9101375E-02
   .9112918E-02   .9134668E-02   .9141203E-02   .9117407E-02   .9103432E-02
   .9126906E-02   .9159326E-02   .9224507E-02   .9556201E-02   .9706687E-02
   .9461170E-02   .9166461E-02   .9041976E-02   .9097826E-02   .9211419E-02
   .9246898E-02   .9194986E-02   .9130044E-02   .9103940E-02   .9121437E-02
   .9154391E-02   .9176943E-02   .9186468E-02   .9190792E-02   .9198567E-02
   .9209695E-02   .9225734E-02   .9241044E-02   .9202254E-02   .8871479E-02
   .8279393E-02   .7579347E-02   .6974526E-02   .6703344E-02   .6665185E-02
   .6344521E-02   .5442515E-02   .4422490E-02   .3892961E-02   .3834095E-02
   .3617694E-02   .2815089E-02   .1836040E-02   .1268888E-02   .1185477E-02
   .1226889E-02   .6531264E-03  -.4701890E-03  -.1301861E-02  -.1498917E-02
  -.1312364E-02  -.1123964E-02  -.1165379E-02  -.1643919E-02  -.2396605E-02
  -.3172524E-02  -.3769423E-02  -.4000990E-02  -.4019170E-02  -.4330988E-02
  -.5226675E-02  -.6243153E-02  -.6773946E-02  -.6782600E-02  -.6617823E-02
  -.6581077E-02  -.6992393E-02  -.7963229E-02  -.8926044E-02  -.8902324E-02
  -.7792186E-02  -.6779697E-02  -.6957213E-02  -.8291583E-02  -.9488683E-02
  -.9782759E-02  -.8994790E-02  -.7624162E-02  -.7190685E-02  -.8172748E-02
  -.9407813E-02  -.1017143E-01  -.1030593E-01  -.9819618E-02  -.9307835E-02
  -.9157835E-02  -.9307012E-02  -.9497164E-02  -.9555593E-02  -.9433153E-02
  -.8815503E-02  -.7660206E-02  -.6765689E-02  -.6524016E-02  -.6760248E-02
  -.7494827E-02  -.8631875E-02  -.9342612E-02  -.8944059E-02  -.7626997E-02
  -.6568140E-02  -.6380784E-02  -.7014308E-02  -.8163994E-02  -.9184845E-02
  -.9336599E-02  -.8436784E-02  -.7221263E-02  -.6552987E-02  -.6593431E-02
  -.7287034E-02  -.8537141E-02  -.9483843E-02  -.9686634E-02  -.9277995E-02
  -.8726741E-02  -.8750197E-02  -.9190311E-02  -.9566340E-02  -.9653373E-02
  -.9521346E-02  -.9209386E-02  -.8837797E-02  -.8905083E-02  -.9252846E-02
  -.9526567E-02  -.9750296E-02  -.9993530E-02  -.9841037E-02  -.9303347E-02
  -.8576601E-02  -.8221515E-02  -.8597829E-02  -.9240844E-02  -.9586740E-02
  -.9547611E-02  -.9355752E-02  -.9238658E-02  -.9260205E-02  -.9368451E-02
  -.9700203E-02  -.1052440E-01  -.1094968E-01  -.1038806E-01  -.9280694E-02
  -.8168920E-02  -.8115897E-02  -.8896023E-02  -.9576418E-02  -.9839998E-02
  -.9959403E-02  -.9757787E-02  -.9273886E-02  -.8740612E-02  -.8708097E-02
  -.9099920E-02  -.9577877E-02  -.1022632E-01  -.1094048E-01  -.1075738E-01
  -.9768997E-02  -.8712154E-02  -.8444027E-02  -.8919430E-02  -.9438802E-02
  -.9581054E-02  -.9267391E-02  -.8196574E-02  -.6969753E-02  -.6459598E-02
  -.7045220E-02  -.8321698E-02  -.9178183E-02  -.8554870E-02  -.7069481E-02
  -.5671710E-02  -.4782538E-02  -.5154798E-02  -.6296730E-02  -.7059234E-02
  -.6940901E-02  -.5739939E-02  -.4329335E-02  -.3677099E-02  -.3806980E-02
  -.4198683E-02  -.4401425E-02  -.4219903E-02  -.3316855E-02  -.1936556E-02
  -.4619356E-03   .6372671E-03   .4435655E-03  -.7357452E-03  -.1660475E-02
  -.1707116E-02  -.7028917E-03   .6983079E-03   .1474516E-02   .1348767E-02
   .3171492E-03  -.1002637E-02  -.1694733E-02  -.1566727E-02  -.5868550E-03
   .6946492E-03   .1376243E-02   .1232120E-02   .2205535E-03  -.9810194E-03
  -.9802434E-03   .1963909E-03   .1315790E-02   .1876740E-02   .1849519E-02
   .1305918E-02   .4102790E-03  -.2428827E-03   .2176452E-03   .1570651E-02
   .3158332E-02   .4013795E-02   .4009490E-02   .3669651E-02   .3481564E-02
   .3566017E-02   .3770166E-02   .3940485E-02   .4237084E-02   .4763913E-02
   .5200744E-02   .5576113E-02   .6047333E-02   .6395967E-02   .6509415E-02
   .6478766E-02   .6433026E-02   .6430934E-02   .6463450E-02   .6488798E-02
   .6490182E-02   .6472584E-02   .6451876E-02   .6440525E-02   .6441179E-02
   .6446791E-02   .6449658E-02   .6448976E-02   .6447468E-02   .6458791E-02
   .6484565E-02   .6497298E-02   .6513422E-02   .6532693E-02   .6541525E-02
   .6543043E-02   .6539724E-02   .6537682E-02   .6539161E-02   .6540679E-02
   .6551492E-02   .6568819E-02   .6393856E-02   .5838967E-02   .5142946E-02
   .4602748E-02   .4491508E-02   .4362789E-02   .4161639E-02   .4037372E-02
   .4376479E-02   .5446141E-02   .6420162E-02   .6390953E-02   .5189375E-02
   .3967879E-02   .3530461E-02   .3759688E-02   .4231417E-02   .4672878E-02
   .4573029E-02   .4069517E-02   .3440501E-02   .2696422E-02   .2729845E-02
   .3430333E-02   .4014737E-02   .4114904E-02   .3660416E-02   .2760258E-02
   .2606007E-02   .3236549E-02   .3868380E-02   .4066689E-02   .3919623E-02
   .3697539E-02   .3348709E-02   .2465185E-02   .1769033E-02   .2276029E-02
   .3386493E-02   .4071293E-02   .4060916E-02   .3725424E-02   .3490731E-02
   .3498331E-02   .3639407E-02   .3754549E-02   .3770801E-02   .3699827E-02
   .3359490E-02   .2366976E-02   .1303643E-02   .8176664E-03   .8880481E-03
   .1235036E-02   .1658537E-02   .1635065E-02   .1238871E-02   .9050596E-03
   .8363823E-03   .9622797E-03   .1225450E-02   .1730921E-02   .2102468E-02
   .1837769E-02   .1258443E-02   .9022838E-03   .8986613E-03   .1069435E-02
   .1210224E-02   .1210412E-02   .1117820E-02   .1045460E-02   .1061007E-02
   .1124316E-02   .1171300E-02   .1172733E-02   .1120910E-02   .1052245E-02
   .7850857E-03  -.1080983E-03  -.8715982E-03  -.4413644E-03   .6268636E-03
   .1329432E-02   .1379653E-02   .1076732E-02   .5782874E-03  -.3886824E-03
  -.1305915E-02  -.1422853E-02  -.4107299E-03   .8042922E-03   .1317060E-02
   .8825715E-03  -.4455988E-03  -.1679107E-02  -.2090252E-02  -.1611490E-02
  -.3660705E-03   .4834735E-03  -.1173195E-03  -.1408615E-02  -.2239734E-02
  -.2300080E-02  -.1966631E-02  -.1709997E-02  -.1715248E-02  -.1894641E-02
  -.2059062E-02  -.2335195E-02  -.2966519E-02  -.3040440E-02  -.2491763E-02
  -.1966684E-02  -.1835003E-02  -.2243997E-02  -.3370599E-02  -.4486265E-02
  -.4931363E-02  -.4798800E-02  -.4534420E-02  -.4443496E-02  -.4566504E-02
  -.4992033E-02  -.6006502E-02  -.6776609E-02  -.6260381E-02  -.5092041E-02
  -.4324790E-02  -.4253293E-02  -.4572815E-02  -.5094128E-02  -.5918817E-02
  -.6219399E-02  -.5563516E-02  -.4674304E-02  -.4255958E-02  -.4350002E-02
  -.4634762E-02  -.5034506E-02  -.5679621E-02  -.5666644E-02  -.5037429E-02
  -.4509021E-02  -.4387998E-02  -.4547953E-02  -.4849033E-02  -.5249965E-02
  -.5247117E-02  -.4882850E-02  -.4569042E-02  -.4500513E-02  -.4603111E-02
  -.4727013E-02  -.4799524E-02  -.4810681E-02  -.4789100E-02  -.4774374E-02
  -.4781933E-02  -.4804391E-02  -.4825026E-02  -.4836401E-02  -.4839828E-02
  -.4842893E-02  -.4848508E-02  -.4856432E-02  -.4866908E-02  -.4876983E-02
  -.4884421E-02  -.4888761E-02  -.4893890E-02  -.4900271E-02  -.4903188E-02
  -.4904088E-02  -.4902851E-02  -.4896727E-02  -.4820609E-02  -.4404897E-02
  -.3846546E-02  -.3456717E-02  -.3006252E-02  -.2547060E-02  -.2287911E-02
  -.2231333E-02  -.2261981E-02  -.2278703E-02  -.2253331E-02  -.2212308E-02
  -.2186475E-02  -.2186233E-02  -.2199965E-02  -.2211729E-02  -.2212241E-02
  -.2203857E-02  -.2192946E-02  -.2187746E-02  -.2188768E-02  -.2193047E-02
  -.2194822E-02  -.2195625E-02  -.2247028E-02  -.2702212E-02  -.3672657E-02
  -.4544987E-02  -.4862272E-02  -.4774999E-02  -.4603878E-02  -.4543364E-02
  -.4533740E-02  -.4198304E-02  -.3743486E-02  -.3834456E-02  -.4198379E-02
  -.3757148E-02  -.2717124E-02  -.1974576E-02  -.1839303E-02  -.2041632E-02
  -.2183785E-02  -.1972563E-02  -.9745119E-03   .2550077E-03   .8996847E-03
   .9512315E-03   .1063148E-02   .1257819E-02   .1963498E-02   .2962255E-02
   .3569334E-02   .3632352E-02   .3437874E-02   .3300047E-02   .3327874E-02
   .3463560E-02   .3572269E-02   .3728321E-02   .4533889E-02   .5634817E-02
   .6267560E-02   .6305960E-02   .6094299E-02   .5965586E-02   .6015748E-02
   .6214210E-02   .6643459E-02   .6794505E-02   .6515134E-02   .6183073E-02
   .6050398E-02   .6105689E-02   .6206693E-02   .6228687E-02   .6171645E-02
   .6104371E-02   .6076725E-02   .6091405E-02   .6111709E-02   .6097746E-02
   .6058422E-02   .6031930E-02   .6027894E-02   .6038466E-02   .6051795E-02
   .6058562E-02   .6054345E-02   .6025495E-02   .5989392E-02   .5975999E-02
   .5986801E-02   .6005647E-02   .6020120E-02   .6026214E-02   .6029512E-02
   .6035690E-02   .6044353E-02   .6052232E-02   .6058508E-02   .6061740E-02
   .6063081E-02   .6067723E-02   .6121602E-02   .6433737E-02   .6718313E-02
   .6897056E-02   .7218021E-02   .7787968E-02   .8430539E-02   .8792675E-02
   .8833148E-02   .8742001E-02   .8694270E-02   .8735920E-02   .8815556E-02
   .8874452E-02   .8908282E-02   .8934219E-02   .8949494E-02   .8955339E-02
   .8961369E-02   .8970689E-02   .8981150E-02   .8990544E-02   .8994091E-02
   .8976810E-02   .8963007E-02   .8980260E-02   .9007540E-02   .9004054E-02
   .8985751E-02   .8972236E-02   .8979090E-02   .9009504E-02   .9020051E-02
   .9015263E-02   .9024230E-02   .9022065E-02   .8996863E-02   .8977663E-02
   .8977297E-02   .8986678E-02   .8989519E-02   .8956733E-02   .8802382E-02
   .8089312E-02   .6966044E-02   .6214697E-02   .6082412E-02   .6259244E-02
   .6397507E-02   .6373372E-02   .6252923E-02   .6156388E-02   .6135413E-02
   .6167639E-02   .6190995E-02   .6182682E-02   .6159325E-02   .6120341E-02
   .6091857E-02   .6083836E-02   .6088793E-02   .6071878E-02   .6024971E-02
   .5984091E-02   .5965668E-02   .5965279E-02   .5968000E-02   .5963090E-02
   .5954341E-02   .5943986E-02   .5932465E-02   .5865727E-02   .5323367E-02
   .4211183E-02   .3337759E-02   .3094479E-02   .3264458E-02   .3454901E-02
   .3477308E-02   .3366482E-02   .3269900E-02   .3247928E-02   .3280203E-02
   .3316366E-02   .3273494E-02   .2740854E-02   .1617541E-02   .7210764E-03
   .4878094E-03   .6798561E-03   .8541611E-03   .5603297E-03  -.4075386E-03
  -.1537707E-02  -.2138055E-02  -.2134070E-02  -.1879369E-02  -.1704189E-02
  -.1719112E-02  -.1843012E-02  -.1972259E-02  -.2276348E-02  -.3035447E-02
  -.3958451E-02  -.4486763E-02  -.4530997E-02  -.4367676E-02  -.4262199E-02
  -.4277415E-02  -.4337104E-02  -.4374533E-02  -.4367631E-02  -.4316886E-02
  -.4250051E-02  -.4211894E-02  -.4212868E-02  -.4232846E-02  -.4245339E-02
  -.4231632E-02  -.4207086E-02  -.4196392E-02  -.4183027E-02  -.4172868E-02
  -.4172674E-02  -.4177535E-02  -.4181279E-02  -.4165482E-02  -.4125673E-02
  -.4090530E-02  -.4079594E-02  -.4100544E-02  -.4098018E-02  -.3816095E-02
  -.3236917E-02  -.3030482E-02  -.3473611E-02  -.3991108E-02  -.3918295E-02
  -.3053524E-02  -.2406732E-02  -.2871563E-02  -.3755293E-02  -.4241001E-02
  -.4203355E-02  -.3966444E-02  -.3823831E-02  -.3829737E-02  -.3914143E-02
  -.3987857E-02  -.4064681E-02  -.4579214E-02  -.5655403E-02  -.6494657E-02
  -.6721264E-02  -.6577264E-02  -.6425319E-02  -.6463403E-02  -.7029557E-02
  -.7706170E-02  -.7505472E-02  -.6844535E-02  -.6445518E-02  -.6894820E-02
  -.7926947E-02  -.8654064E-02  -.9021754E-02  -.9096656E-02  -.9039910E-02
  -.9006783E-02  -.8991886E-02  -.8552549E-02  -.7710841E-02  -.7165882E-02
  -.7303271E-02  -.8209845E-02  -.8781019E-02  -.8219459E-02  -.7032869E-02
  -.6224325E-02  -.6121983E-02  -.6397890E-02  -.6614569E-02  -.6604629E-02
  -.6483154E-02  -.6366644E-02  -.6305702E-02  -.6318790E-02  -.6422239E-02
  -.6998503E-02  -.8132626E-02  -.9015708E-02  -.9254407E-02  -.9083677E-02
  -.8894203E-02  -.8879559E-02  -.8996688E-02  -.9116623E-02  -.9157023E-02
  -.9127946E-02  -.9079236E-02  -.9053915E-02  -.9055682E-02  -.9073642E-02
  -.9084402E-02  -.9085867E-02  -.9081565E-02  -.9091148E-02  -.9128527E-02
  -.9167151E-02  -.9183094E-02  -.9178539E-02  -.9168113E-02  -.9129506E-02
  -.8727307E-02  -.7660084E-02  -.6869821E-02  -.6491422E-02  -.6604105E-02
  -.6824046E-02  -.6912915E-02  -.6844992E-02  -.6723290E-02  -.6652801E-02
  -.6656149E-02  -.6693661E-02  -.6719924E-02  -.6713930E-02  -.6687960E-02
  -.6647680E-02  -.6455315E-02  -.6110332E-02  -.5949665E-02  -.5709760E-02
  -.5251111E-02  -.4564858E-02  -.4210256E-02  -.4380690E-02  -.4407875E-02
  -.4174612E-02  -.3912722E-02  -.3785378E-02  -.3786425E-02  -.3830097E-02
  -.3850223E-02  -.3832373E-02  -.3795183E-02  -.3767913E-02  -.3756383E-02
  -.3753994E-02  -.3747144E-02  -.3734606E-02  -.3716000E-02  -.3697281E-02
  -.3683520E-02  -.3672874E-02  -.3663145E-02  -.3648152E-02  -.3628098E-02
  -.3610394E-02  -.3595445E-02  -.3584334E-02  -.3573126E-02  -.3560016E-02
  -.3547414E-02  -.3532864E-02  -.3519067E-02  -.3506691E-02  -.3493429E-02
  -.3479665E-02  -.3466410E-02  -.3455824E-02  -.3447321E-02  -.3439846E-02
  -.3429128E-02  -.3413210E-02  -.3397563E-02  -.3381709E-02  -.3366842E-02
  -.3351338E-02  -.3332615E-02  -.3313740E-02  -.3295285E-02  -.3276726E-02
  -.3252052E-02  -.3152978E-02  -.2648849E-02  -.1655018E-02  -.7553729E-03
  -.4054753E-03  -.4898028E-03  -.6575718E-03  -.6921869E-03  -.5963645E-03
  -.4754820E-03  -.4121234E-03  -.4145425E-03  -.4330327E-03  -.3620739E-03
   .1362982E-03   .1132871E-02   .2030408E-02   .2374995E-02   .2284748E-02
   .2113145E-02   .2076853E-02   .2174841E-02   .2295940E-02   .2357020E-02
   .2347219E-02   .2312425E-02   .2296033E-02   .2356931E-02   .2712812E-02
   .3315722E-02   .4007133E-02   .4595679E-02   .4856340E-02   .4842312E-02
   .4760608E-02   .4745692E-02   .4806263E-02   .4881528E-02   .4921808E-02
   .4918619E-02   .4900918E-02   .4944217E-02   .5341736E-02   .6234668E-02
   .7141187E-02   .7554261E-02   .7497840E-02   .7205535E-02   .6470390E-02
   .5562319E-02   .5603795E-02   .6601454E-02   .7501074E-02   .7738791E-02
   .7503343E-02   .7273180E-02   .7691792E-02   .8836843E-02   .9788644E-02
   .1002852E-01   .9535491E-02   .8522224E-02   .7786594E-02   .8118703E-02
   .9135601E-02   .9876230E-02   .9969345E-02   .9681135E-02   .9415837E-02
   .9355802E-02   .9440955E-02   .9533930E-02   .9547439E-02   .9487042E-02
   .9405354E-02   .9348854E-02   .9325191E-02   .9311942E-02   .9288892E-02
   .9253439E-02   .9216825E-02   .9179973E-02   .9120931E-02   .8864268E-02
   .8555913E-02   .8631148E-02   .8899386E-02   .9059528E-02   .8977644E-02
   .8365578E-02   .7276237E-02   .6701923E-02   .7226349E-02   .8296599E-02
   .8970093E-02   .8976441E-02   .8622957E-02   .8091792E-02   .7306363E-02
   .6562728E-02   .6635706E-02   .7609986E-02   .8463478E-02   .8407955E-02
   .7396292E-02   .6200374E-02   .5604682E-02   .5652216E-02   .5919042E-02
   .6043441E-02   .5948472E-02   .5760424E-02   .5624703E-02   .5588054E-02
   .5608289E-02   .5618627E-02   .5594809E-02   .5547255E-02   .5498826E-02
   .5462645E-02   .5434257E-02   .5407707E-02   .5374249E-02   .5338543E-02
   .5304869E-02   .5272691E-02   .5242080E-02   .5210735E-02   .5179430E-02
   .5146610E-02   .5114688E-02   .5082622E-02   .5048372E-02   .4990347E-02
   .4713189E-02   .3991446E-02   .3162864E-02   .3109905E-02   .3998565E-02
   .4848022E-02   .4870071E-02   .3968266E-02   .2833482E-02   .2243251E-02
   .2271849E-02   .2530255E-02   .2662957E-02   .2587866E-02   .2421513E-02
   .2298415E-02   .2267011E-02   .2289489E-02   .2308392E-02   .2296580E-02
   .2260844E-02   .2219160E-02   .2187623E-02   .2165962E-02   .2148589E-02
   .2128264E-02   .2105057E-02   .2082146E-02   .2061720E-02   .2040281E-02
   .2018033E-02   .1993158E-02   .1967542E-02   .1946112E-02   .1926276E-02
   .1906320E-02   .1883398E-02   .1860457E-02   .1837002E-02   .1815330E-02
   .1797448E-02   .1778517E-02   .1757064E-02   .1734973E-02   .1711077E-02
   .1688154E-02   .1666344E-02   .1646875E-02   .1627172E-02   .1605438E-02
   .1580048E-02   .1529557E-02   .1281317E-02   .6417641E-03  -.1192364E-03
  -.5506311E-03  -.5890944E-03  -.4650605E-03  -.3995416E-03  -.4491093E-03
  -.5490048E-03  -.6214908E-03  -.6460079E-03  -.6820721E-03  -.9866299E-03
  -.1684527E-02  -.2402349E-02  -.2739115E-02  -.2714053E-02  -.2577218E-02
  -.2521091E-02  -.2570049E-02  -.2658130E-02  -.2784292E-02  -.3287939E-02
  -.4079983E-02  -.4600912E-02  -.4677952E-02  -.4523224E-02  -.4394062E-02
  -.4391846E-02  -.4498433E-02  -.4758179E-02  -.4913691E-02  -.4824290E-02
  -.5060367E-02  -.5717817E-02  -.6252378E-02  -.6390846E-02  -.6262508E-02
  -.6108598E-02  -.6056945E-02  -.6090040E-02  -.6129064E-02  -.6123977E-02
  -.6079339E-02  -.6026671E-02  -.6018311E-02  -.6223661E-02  -.6610290E-02
  -.7065031E-02  -.7444558E-02  -.7583053E-02  -.7522090E-02  -.7408651E-02
  -.7345983E-02  -.7338086E-02  -.7339978E-02  -.7314422E-02  -.7259735E-02
  -.7192115E-02  -.7126834E-02  -.7071618E-02  -.7021902E-02  -.6975636E-02
  -.6930621E-02  -.6884926E-02  -.6835810E-02  -.6783969E-02  -.6733132E-02
  -.6683287E-02  -.6636761E-02  -.6627999E-02  -.6845162E-02  -.7377544E-02
  -.7848151E-02  -.7617626E-02  -.6813943E-02  -.6161934E-02  -.5984846E-02
  -.6109739E-02  -.6236244E-02  -.6216233E-02  -.6083541E-02  -.5942199E-02
  -.5858569E-02  -.5828714E-02  -.5811897E-02  -.5778602E-02  -.5723256E-02
  -.5658865E-02  -.5597548E-02  -.5543791E-02  -.5495678E-02  -.5446874E-02
  -.5396214E-02  -.5343796E-02  -.5290516E-02  -.5239224E-02  -.5187692E-02
  -.5135883E-02  -.5084342E-02  -.5031693E-02  -.4978220E-02  -.4925130E-02
  -.4873140E-02  -.4817594E-02  -.4704706E-02  -.4265893E-02  -.3592892E-02
  -.3129964E-02  -.3016994E-02  -.3088372E-02  -.3139156E-02  -.3092064E-02
  -.2986771E-02  -.2894961E-02  -.2846511E-02  -.2828734E-02  -.2813691E-02
  -.2785386E-02  -.2746639E-02  -.2699646E-02  -.2627762E-02  -.2395819E-02
  -.2047797E-02  -.1805544E-02  -.1712266E-02  -.1557621E-02  -.1284953E-02
  -.1062479E-02  -.9733736E-03  -.9735187E-03  -.9857179E-03  -.9684135E-03
  -.9292881E-03  -.9166385E-03  -.1065188E-02  -.1356157E-02  -.1711011E-02
  -.2016696E-02  -.2134151E-02  -.2090980E-02  -.2003808E-02  -.1952982E-02
  -.1943677E-02  -.1914462E-02  -.1628290E-02  -.1034451E-02  -.5549996E-03
  -.4012701E-03  -.4631714E-03  -.5398942E-03  -.5305815E-03  -.4540433E-03
  -.3718103E-03  -.3137093E-03  -.1910562E-03  -.2816578E-04   .1822275E-03
   .5844259E-03   .9269940E-03   .1050222E-02   .1016672E-02   .9593855E-03
   .9549052E-03   .9972412E-03   .1044029E-02   .1066898E-02   .1067504E-02
   .1060109E-02   .1059370E-02   .1067030E-02   .1079562E-02   .1103367E-02
   .1214556E-02   .1368858E-02   .1555645E-02   .1905872E-02   .2195542E-02
   .2287946E-02   .2241770E-02   .2178899E-02   .2163294E-02   .2187526E-02
   .2214966E-02   .2219462E-02   .2202340E-02   .2179807E-02   .2164075E-02
   .2156747E-02   .2152966E-02   .2148687E-02   .2162366E-02   .2354329E-02
   .2760416E-02   .3071154E-02   .3136975E-02   .3047404E-02   .2950728E-02
   .2918698E-02   .2934008E-02   .2950510E-02   .2940361E-02   .2904467E-02
   .2860868E-02   .2826861E-02   .2816431E-02   .2908305E-02   .3183984E-02
   .3504355E-02   .3657392E-02   .3621884E-02   .3512855E-02   .3434432E-02
   .3409917E-02   .3409140E-02   .3394932E-02   .3354555E-02   .3297825E-02
   .3242364E-02   .3195633E-02   .3156034E-02   .3118257E-02   .3077807E-02
   .3036089E-02   .2994201E-02   .2952360E-02   .2910035E-02   .2868581E-02
   .2828694E-02   .2789194E-02   .2747958E-02   .2706305E-02   .2664928E-02
   .2625515E-02   .2585731E-02   .2545965E-02   .2504619E-02   .2462572E-02
   .2421170E-02   .2381154E-02   .2341606E-02   .2302359E-02   .2265722E-02
   .2234481E-02   .2200826E-02   .2157895E-02   .2105775E-02   .2048954E-02
   .1949218E-02   .1843379E-02   .1839474E-02   .1882331E-02   .1895629E-02
   .1864335E-02   .1810938E-02   .1755728E-02   .1716531E-02   .1683387E-02
   .1598652E-02   .1488991E-02   .1408867E-02   .1257535E-02   .1046690E-02
   .8966439E-03   .8470631E-03   .8506939E-03   .8505366E-03   .8251389E-03
   .7854568E-03   .7501600E-03   .7281826E-03   .7143914E-03   .7001817E-03
   .6813472E-03   .6580780E-03   .6316175E-03   .6077282E-03   .5908603E-03
   .5674354E-03   .4891709E-03   .3148926E-03   .1205325E-03   .6312773E-04
   .1986595E-03   .3914223E-03   .4382283E-03   .2732336E-03   .3710732E-04
  -.9667576E-04  -.1013005E-03  -.5383482E-04  -.2654308E-04  -.3954468E-04
  -.7300971E-04  -.9916782E-04  -.1071229E-03  -.1027472E-03  -.9711606E-04
  -.9774262E-04  -.1044977E-03  -.1133290E-03  -.1214243E-03  -.1311410E-03
  -.1741552E-03  -.2850831E-03  -.4103496E-03  -.4402416E-03  -.3349686E-03
  -.1849741E-03  -.1044783E-03  -.1102988E-03  -.1508237E-03  -.1760515E-03
  -.1730654E-03  -.1573332E-03  -.1476910E-03  -.1500975E-03  -.1605261E-03
  -.1953518E-03  -.2570933E-03  -.3002208E-03  -.3079023E-03  -.2992264E-03
  -.3174953E-03  -.3739615E-03  -.4212213E-03  -.4335193E-03  -.4186124E-03
  -.3998971E-03  -.3916316E-03  -.3927458E-03  -.3946909E-03  -.3925460E-03
  -.3858823E-03  -.3778414E-03  -.3712850E-03  -.3672452E-03  -.3643937E-03
  -.3610614E-03  -.3562693E-03  -.3498478E-03  -.3433583E-03  -.3380817E-03
  -.3339910E-03  -.3294250E-03  -.3238559E-03  -.3198152E-03  -.3165145E-03
  -.3126873E-03  -.3084968E-03  -.3044913E-03  -.3008854E-03  -.2974521E-03
  -.2941746E-03  -.2902514E-03  -.2856027E-03  -.2806968E-03  -.2763049E-03
  -.2725742E-03  -.2693056E-03  -.2669476E-03  -.2649759E-03  -.2620104E-03
  -.2578952E-03  -.2534291E-03  -.2487365E-03  -.2443496E-03  -.2407984E-03
  -.2382059E-03  -.2361770E-03  -.2331053E-03  -.2289356E-03  -.2248215E-03
  -.2213655E-03  -.2182956E-03  -.2156137E-03  -.2127253E-03  -.2063820E-03
  -.1867415E-03  -.1498020E-03  -.1144145E-03  -.9884433E-04  -.1000833E-03
  -.1059637E-03  -.1079758E-03  -.1053141E-03  -.1022617E-03  -.1017188E-03
  -.1028497E-03  -.1022111E-03  -.9080257E-04  -.6565922E-04  -.4126265E-04
  -.3236833E-04  -.3735054E-04  -.4632460E-04  -.5209760E-04  -.5337187E-04
  -.5267447E-04  -.5300377E-04  -.5592708E-04  -.5993639E-04  -.6277881E-04
  -.6427265E-04  -.6552717E-04  -.6738340E-04  -.6971640E-04  -.7215258E-04
  -.7444188E-04  -.7637408E-04  -.7815020E-04  -.7997680E-04  -.8151551E-04
  -.8297035E-04  -.8454516E-04  -.8605360E-04  -.8722135E-04  -.8800214E-04
  -.8895462E-04  -.9011985E-04  -.9144447E-04  -.9273373E-04  -.9372746E-04
  -.9442022E-04  -.9479387E-04  -.9513286E-04  -.9572331E-04  -.9645239E-04
  -.9688652E-04  -.9672237E-04  -.9469839E-04  -.9212130E-04  -.8946943E-04
  -.8547888E-04  -.8336890E-04  -.8198901E-04  -.8154585E-04  -.8242293E-04
  -.8397855E-04  -.8554887E-04  -.8680644E-04  -.8788578E-04  -.8892962E-04
  -.9005147E-04  -.9112616E-04  -.9204895E-04  -.9278438E-04  -.9325106E-04
  -.9367661E-04  -.9409151E-04  -.9435540E-04  -.9451653E-04  -.9484622E-04
  -.9526341E-04  -.9544300E-04  -.9538884E-04  -.9529508E-04  -.9524900E-04
  -.9529248E-04  -.9606373E-04  -.9836862E-04  -.1006716E-03  -.1005328E-03
  -.9744145E-04  -.9371286E-04  -.9217638E-04  -.9345152E-04  -.9544830E-04
  -.9585094E-04  -.9443827E-04  -.9233336E-04  -.9049880E-04  -.8913539E-04
  -.8797964E-04  -.8678233E-04  -.8544979E-04  -.8422010E-04  -.8299592E-04
  -.8125716E-04  -.7941339E-04  -.7798883E-04  -.7722137E-04  -.7659945E-04
  -.7544438E-04  -.7368804E-04  -.7173118E-04  -.6990081E-04  -.6826327E-04
  -.6670381E-04  -.6521894E-04  -.6388873E-04  -.6241421E-04  -.6050075E-04
  -.5835313E-04  -.5648748E-04  -.5505176E-04  -.5376554E-04  -.5238804E-04
  -.5078114E-04  -.4905194E-04  -.4736369E-04  -.4575484E-04  -.4422033E-04
  -.4274334E-04  -.4129630E-04  -.3986535E-04  -.3844828E-04  -.3707414E-04
  -.3573762E-04  -.3445106E-04  -.3320706E-04  -.3201133E-04  -.3085431E-04
  -.2969361E-04  -.2855622E-04  -.2746499E-04  -.2644651E-04  -.2546364E-04
  -.2449002E-04  -.2352348E-04  -.2258285E-04  -.2168368E-04  -.2082637E-04
  -.2000980E-04  -.1923028E-04  -.1848472E-04  -.1777733E-04  -.1710795E-04
  -.1647938E-04  -.1588966E-04  -.1533350E-04  -.1481196E-04  -.1432927E-04
  -.1388619E-04  -.1348188E-04  -.1311559E-04  -.1278811E-04  -.1250066E-04
  -.1225406E-04  -.1204826E-04  -.1188386E-04  -.1176143E-04  -.1168139E-04
  -.1164398E-04
