# Supplementary material for: Earthquake Response Analysis of Tall Reinforced Concrete Chimneys considering Eccentricity
Source: Hindawi journal article supplement (doi:10.1155/2020/1417969), 2020-03-11
Supplement: f1 [file 1417969.f1.zip › 1417969.f1/Four kinds of earthquake records/Stiff soil/MORGAN HVR-UP.txt]

PEER STRONG MOTION DATABASE RECORD. PROCESSING BY PACIFIC ENGINEERING.
MORGAN HILL 04/24/84 04:24, HALLS VALLEY,  UP (CDMG STATION 57191)
ACCELERATION TIME HISTORY IN UNITS OF G. FILTER POINTS: HP=0.2 Hz LP=28.0 Hz
NPTS=  7996, DT= .00500 SEC
   .3429593E-03   .3457446E-03   .3277163E-03   .3072138E-03   .2868743E-03
   .2693053E-03   .2601496E-03   .2607787E-03   .2681539E-03   .2766978E-03
   .2784630E-03   .2678274E-03   .2498047E-03   .2439643E-03   .2723263E-03
   .3402990E-03   .4332566E-03   .5171326E-03   .5463268E-03   .4824987E-03
   .3039267E-03   .1881439E-04  -.3188074E-03  -.6262032E-03  -.8041681E-03
  -.7712100E-03  -.5003704E-03  -.8843337E-05   .6383386E-03   .1302809E-02
   .1861045E-02   .2272719E-02   .2553441E-02   .2728022E-02   .2796315E-02
   .2724042E-02   .2470362E-02   .2011813E-02   .1348627E-02   .5278999E-03
  -.3099575E-03  -.9811225E-03  -.1346344E-02  -.1366076E-02  -.1135698E-02
  -.8106574E-03  -.5069216E-03  -.3251690E-03  -.3636087E-03  -.6546345E-03
  -.1124576E-02  -.1597114E-02  -.1912249E-02  -.2020842E-02  -.2023867E-02
  -.2121142E-02  -.2442841E-02  -.2937058E-02  -.3392226E-02  -.3612678E-02
  -.3559554E-02  -.3266265E-02  -.2670180E-02  -.1660556E-02  -.1364622E-03
   .1895159E-02   .4111462E-02   .5931438E-02   .6779159E-02   .6456523E-02
   .5200435E-02   .3426377E-02   .1546997E-02  -.1478616E-03  -.1562709E-02
  -.2671771E-02  -.3348876E-02  -.3413090E-02  -.2878065E-02  -.2070801E-02
  -.1480118E-02  -.1477052E-02  -.2011168E-02  -.2505599E-02  -.2384163E-02
  -.1510075E-02  -.1337292E-03   .1374597E-02   .2922500E-02   .4677420E-02
   .6821950E-02   .9252929E-02   .1139168E-01   .1246312E-01   .1200581E-01
   .1010705E-01   .7065315E-02   .3104739E-02  -.1266727E-02  -.5247322E-02
  -.8147848E-02  -.9664652E-02  -.9851238E-02  -.8891400E-02  -.6822443E-02
  -.3587830E-02   .6326551E-03   .5177437E-02   .8829148E-02   .1018837E-01
   .8610523E-02   .4741532E-02   .2171603E-03  -.3570520E-02  -.6216956E-02
  -.8219038E-02  -.1015649E-01  -.1206586E-01  -.1355754E-01  -.1423806E-01
  -.1395506E-01  -.1301217E-01  -.1154843E-01  -.9124545E-02  -.5311336E-02
  -.2479140E-03   .5322475E-02   .1013423E-01   .1320117E-01   .1469288E-01
   .1543481E-01   .1616646E-01   .1700049E-01   .1738564E-01   .1672546E-01
   .1504061E-01   .1303551E-01   .1130809E-01   .9805298E-02   .7862810E-02
   .5047846E-02   .1675990E-02  -.1620819E-02  -.4580461E-02  -.7305914E-02
  -.9855874E-02  -.1215197E-01  -.1375800E-01  -.1374928E-01  -.1131066E-01
  -.6801505E-02  -.1694292E-02   .2139971E-02   .3174831E-02   .1132863E-02
  -.2727118E-02  -.6227517E-02  -.7102103E-02  -.4134585E-02   .3032270E-02
   .1350625E-01   .2540773E-01   .3661468E-01   .4477790E-01   .4766412E-01
   .4453334E-01   .3680771E-01   .2745452E-01   .1937828E-01   .1337613E-01
   .8330901E-02   .2698489E-02  -.3981383E-02  -.1074950E-01  -.1640206E-01
  -.2006983E-01  -.2155960E-01  -.2129539E-01  -.1997290E-01  -.1817212E-01
  -.1663832E-01  -.1625004E-01  -.1761149E-01  -.2060564E-01  -.2378083E-01
  -.2529824E-01  -.2392570E-01  -.1927680E-01  -.1136352E-01  -.5548681E-03
   .1162641E-01   .2312075E-01   .3122982E-01   .3338558E-01   .2887484E-01
   .1904551E-01   .6656215E-02  -.4340431E-02  -.1106026E-01  -.1254240E-01
  -.9983615E-02  -.5931138E-02  -.2757130E-02  -.2037108E-02  -.4523523E-02
  -.9459916E-02  -.1489942E-01  -.1855533E-01  -.1867752E-01  -.1454551E-01
  -.6581315E-02   .3880913E-02   .1517739E-01   .2508703E-01   .3163901E-01
   .3340010E-01   .2980395E-01   .2166158E-01   .1065116E-01  -.1270785E-02
  -.1203332E-01  -.2030747E-01  -.2501392E-01  -.2537365E-01  -.2183204E-01
  -.1623182E-01  -.1096700E-01  -.7831345E-02  -.7281910E-02  -.8687289E-02
  -.1136018E-01  -.1485969E-01  -.1911767E-01  -.2424896E-01  -.3000631E-01
  -.3581176E-01  -.4085088E-01  -.4442868E-01  -.4571070E-01  -.4421232E-01
  -.4003362E-01  -.3389551E-01  -.2652818E-01  -.1806889E-01  -.8655409E-02
   .1574355E-02   .1283505E-01   .2471273E-01   .3560404E-01   .4316321E-01
   .4553739E-01   .4276168E-01   .3690283E-01   .3085038E-01   .2663679E-01
   .2449047E-01   .2307290E-01   .2111914E-01   .1824123E-01   .1422202E-01
   .8625350E-02   .1158462E-02  -.8072752E-02  -.1836441E-01  -.2776641E-01
  -.3393914E-01  -.3541192E-01  -.3271651E-01  -.2763611E-01  -.2177210E-01
  -.1558741E-01  -.8821222E-02  -.1337546E-02   .6348770E-02   .1261518E-01
   .1518043E-01   .1271317E-01   .5540893E-02  -.4594980E-02  -.1493450E-01
  -.2251048E-01  -.2519751E-01  -.2252160E-01  -.1524278E-01  -.4994379E-02
   .6050869E-02   .1566694E-01   .2235486E-01   .2572333E-01   .2646808E-01
   .2583701E-01   .2479082E-01   .2393667E-01   .2335592E-01   .2264707E-01
   .2110337E-01   .1789819E-01   .1297749E-01   .7539803E-02   .3330962E-02
   .1600091E-02   .2076670E-02   .3143240E-02   .3154074E-02   .1278508E-02
  -.2254817E-02  -.6120579E-02  -.8071118E-02  -.6259286E-02  -.4235464E-04
   .9903132E-02   .2142603E-01   .3220063E-01   .4077175E-01   .4650432E-01
   .4901781E-01   .4770548E-01   .4186581E-01   .3162540E-01   .1768152E-01
   .1608514E-02  -.1363686E-01  -.2538204E-01  -.3206653E-01  -.3364957E-01
  -.3115640E-01  -.2603550E-01  -.2000767E-01  -.1482141E-01  -.1143964E-01
  -.9507341E-02  -.8071225E-02  -.6730986E-02  -.5832563E-02  -.6393669E-02
  -.9381253E-02  -.1475220E-01  -.2178950E-01  -.2923932E-01  -.3602580E-01
  -.4155838E-01  -.4532272E-01  -.4653422E-01  -.4418098E-01  -.3768150E-01
  -.2804773E-01  -.1808969E-01  -.1068457E-01  -.7762398E-02  -.9364879E-02
  -.1368341E-01  -.1770717E-01  -.1882530E-01  -.1619814E-01  -.1072691E-01
  -.4724473E-02  -.1114823E-02  -.2075567E-02  -.7779430E-02  -.1654687E-01
  -.2582371E-01  -.3347708E-01  -.3841587E-01  -.4044522E-01  -.4041191E-01
  -.3971717E-01  -.3937075E-01  -.3989381E-01  -.4152579E-01  -.4400582E-01
  -.4667558E-01  -.4856342E-01  -.4850583E-01  -.4551716E-01  -.3927288E-01
  -.3052006E-01  -.2092830E-01  -.1178265E-01  -.3491609E-02   .4208853E-02
   .1199301E-01   .2034559E-01   .2985911E-01   .4046492E-01   .5186750E-01
   .6331538E-01   .7384703E-01   .8300518E-01   .9045143E-01   .9540266E-01
   .9732112E-01   .9623454E-01   .9259782E-01   .8749071E-01   .8168640E-01
   .7545356E-01   .6819306E-01   .5942735E-01   .4975954E-01   .4089686E-01
   .3475929E-01   .3207414E-01   .3242771E-01   .3509122E-01   .3930010E-01
   .4421678E-01   .4894271E-01   .5276698E-01   .5531653E-01   .5657776E-01
   .5682026E-01   .5616746E-01   .5441760E-01   .5121595E-01   .4666038E-01
   .4144949E-01   .3657351E-01   .3244014E-01   .2884214E-01   .2487404E-01
   .1961105E-01   .1260120E-01   .4081518E-02  -.5064226E-02  -.1383763E-01
  -.2162928E-01  -.2885834E-01  -.3594013E-01  -.4255362E-01  -.4835217E-01
  -.5289442E-01  -.5596106E-01  -.5773691E-01  -.5832579E-01  -.5748586E-01
  -.5499119E-01  -.5092197E-01  -.4583517E-01  -.4054923E-01  -.3573624E-01
  -.3191735E-01  -.2960576E-01  -.2887323E-01  -.2891928E-01  -.2891057E-01
  -.2835822E-01  -.2728065E-01  -.2633402E-01  -.2646875E-01  -.2806902E-01
  -.3078036E-01  -.3408090E-01  -.3781104E-01  -.4152004E-01  -.4456659E-01
  -.4679094E-01  -.4868396E-01  -.5080607E-01  -.5337561E-01  -.5627436E-01
  -.5919708E-01  -.6171717E-01  -.6355255E-01  -.6442734E-01  -.6375601E-01
  -.6079744E-01  -.5549021E-01  -.4845707E-01  -.4083099E-01  -.3379824E-01
  -.2811065E-01  -.2391400E-01  -.2078282E-01  -.1799372E-01  -.1447689E-01
  -.8775554E-02  -.5993247E-03   .8895910E-02   .1820527E-01   .2601471E-01
   .3143237E-01   .3409013E-01   .3413047E-01   .3230596E-01   .2969190E-01
   .2728527E-01   .2574719E-01   .2567253E-01   .2701438E-01   .2883137E-01
   .3032226E-01   .3110781E-01   .3109614E-01   .3019588E-01   .2866763E-01
   .2696448E-01   .2523326E-01   .2302618E-01   .1995774E-01   .1617074E-01
   .1227747E-01   .8936943E-02   .6756520E-02   .5925849E-02   .6282093E-02
   .7406016E-02   .8814344E-02   .1005967E-01   .1051594E-01   .9755215E-02
   .7818291E-02   .5127176E-02   .2458203E-02   .4473967E-03  -.4627719E-03
   .2390705E-03   .2982976E-02   .7524986E-02   .1304539E-01   .1848364E-01
   .2276072E-01   .2539095E-01   .2639867E-01   .2654144E-01   .2665615E-01
   .2718600E-01   .2797191E-01   .2833741E-01   .2760667E-01   .2557100E-01
   .2225235E-01   .1827775E-01   .1454276E-01   .1167762E-01   .9825423E-02
   .8932839E-02   .9277770E-02   .1136213E-01   .1509631E-01   .2005640E-01
   .2518962E-01   .2903348E-01   .2996725E-01   .2735391E-01   .2176136E-01
   .1477020E-01   .8166155E-02   .3196819E-02   .2616724E-03  -.9538472E-03
  -.1184219E-02  -.1211558E-02  -.1593050E-02  -.2276563E-02  -.2901067E-02
  -.3226321E-02  -.3335879E-02  -.3771665E-02  -.5351593E-02  -.8457765E-02
  -.1309055E-01  -.1924340E-01  -.2650995E-01  -.3380561E-01  -.3999421E-01
  -.4439037E-01  -.4663359E-01  -.4663616E-01  -.4487827E-01  -.4218956E-01
  -.3921054E-01  -.3604235E-01  -.3261309E-01  -.2897085E-01  -.2492304E-01
  -.2034865E-01  -.1501911E-01  -.8842431E-02  -.2070344E-02   .4705728E-02
   .1096615E-01   .1640818E-01   .2095201E-01   .2417283E-01   .2552860E-01
   .2490601E-01   .2280694E-01   .2023980E-01   .1807136E-01   .1676905E-01
   .1635303E-01   .1664429E-01   .1721037E-01   .1760018E-01   .1769418E-01
   .1782670E-01   .1834075E-01   .1904681E-01   .1930079E-01   .1848095E-01
   .1643127E-01   .1334709E-01   .9834935E-02   .6735481E-02   .4471139E-02
   .2907020E-02   .1517899E-02  -.4600245E-03  -.3312831E-02  -.7092541E-02
  -.1200505E-01  -.1811525E-01  -.2529196E-01  -.3300144E-01  -.4004900E-01
  -.4544266E-01  -.4898507E-01  -.5077058E-01  -.5102763E-01  -.5023603E-01
  -.4894013E-01  -.4731657E-01  -.4485095E-01  -.4123193E-01  -.3638906E-01
  -.3023436E-01  -.2294007E-01  -.1467819E-01  -.6415927E-02   .7193270E-03
   .5908979E-02   .8720766E-02   .9388388E-02   .8769668E-02   .7540295E-02
   .6403567E-02   .5898637E-02   .6339313E-02   .7910909E-02   .1072085E-01
   .1484126E-01   .2032764E-01   .2728105E-01   .3588328E-01   .4572601E-01
   .5534773E-01   .6312562E-01   .6824655E-01   .7052421E-01   .6997984E-01
   .6714393E-01   .6279367E-01   .5765496E-01   .5217364E-01   .4640147E-01
   .4030716E-01   .3359598E-01   .2608216E-01   .1807513E-01   .1048094E-01
   .4300232E-02   .2966487E-03  -.1298445E-02  -.1086370E-02   .2309857E-03
   .1955962E-02   .3578523E-02   .4811738E-02   .5195737E-02   .4215331E-02
   .1615428E-02  -.2108858E-02  -.6000255E-02  -.9404269E-02  -.1222407E-01
  -.1461992E-01  -.1664013E-01  -.1823639E-01  -.1926225E-01  -.1971531E-01
  -.1967534E-01  -.1910981E-01  -.1797645E-01  -.1630990E-01  -.1465701E-01
  -.1377467E-01  -.1383733E-01  -.1469921E-01  -.1612934E-01  -.1784773E-01
  -.1923510E-01  -.1972166E-01  -.1886734E-01  -.1667135E-01  -.1339656E-01
  -.9576654E-02  -.6001842E-02  -.3291367E-02  -.1501877E-02  -.4672697E-03
  -.2677109E-03  -.7591164E-03  -.1426055E-02  -.1748235E-02  -.1249389E-02
   .4237720E-03   .3332844E-02   .7045067E-02   .1080292E-01   .1399097E-01
   .1609330E-01   .1672300E-01   .1603591E-01   .1438995E-01   .1183681E-01
   .8577716E-02   .5251645E-02   .2617255E-02   .1016692E-02   .1561514E-03
  -.4998262E-03  -.1605129E-02  -.3459081E-02  -.6284522E-02  -.1010274E-01
  -.1492297E-01  -.2075063E-01  -.2744604E-01  -.3468509E-01  -.4174068E-01
  -.4801138E-01  -.5295532E-01  -.5610448E-01  -.5760287E-01  -.5762280E-01
  -.5633532E-01  -.5410715E-01  -.5139869E-01  -.4836569E-01  -.4483916E-01
  -.4081397E-01  -.3601201E-01  -.3050811E-01  -.2465040E-01  -.1866252E-01
  -.1244779E-01  -.6115624E-02  -.1483528E-03   .5064436E-02   .8981259E-02
   .1139996E-01   .1249829E-01   .1266316E-01   .1226075E-01   .1166876E-01
   .1102831E-01   .1041752E-01   .9793354E-02   .9268396E-02   .8949001E-02
   .8828650E-02   .8814214E-02   .8707716E-02   .8319298E-02   .7812374E-02
   .7429837E-02   .7274052E-02   .7308370E-02   .7624902E-02   .8452176E-02
   .9657248E-02   .1112234E-01   .1237493E-01   .1296269E-01   .1265377E-01
   .1169715E-01   .1083817E-01   .1079472E-01   .1183341E-01   .1407828E-01
   .1749708E-01   .2146525E-01   .2550986E-01   .2938085E-01   .3285077E-01
   .3579050E-01   .3810346E-01   .3987378E-01   .4122593E-01   .4200376E-01
   .4193992E-01   .4093843E-01   .3894545E-01   .3605616E-01   .3266559E-01
   .2910089E-01   .2570596E-01   .2264770E-01   .1997112E-01   .1787909E-01
   .1660599E-01   .1609423E-01   .1604387E-01   .1613277E-01   .1617196E-01
   .1611412E-01   .1590481E-01   .1544013E-01   .1480969E-01   .1385782E-01
   .1225198E-01   .9834650E-02   .6589971E-02   .2839048E-02  -.7169600E-03
  -.3359589E-02  -.4720250E-02  -.4934364E-02  -.4405224E-02  -.3769197E-02
  -.3559893E-02  -.3974316E-02  -.4773127E-02  -.5791156E-02  -.6960062E-02
  -.8340993E-02  -.1015827E-01  -.1250891E-01  -.1546647E-01  -.1922673E-01
  -.2368149E-01  -.2869248E-01  -.3406749E-01  -.3949166E-01  -.4445466E-01
  -.4833816E-01  -.5072744E-01  -.5181923E-01  -.5191097E-01  -.5135402E-01
  -.5009474E-01  -.4799193E-01  -.4496212E-01  -.4107175E-01  -.3649866E-01
  -.3148631E-01  -.2589385E-01  -.1962935E-01  -.1285181E-01  -.5927950E-02
   .7636402E-03   .7167063E-02   .1314043E-01   .1845442E-01   .2301439E-01
   .2680299E-01   .2986450E-01   .3209926E-01   .3326956E-01   .3314972E-01
   .3171275E-01   .2918292E-01   .2569204E-01   .2128459E-01   .1615231E-01
   .1060131E-01   .4920559E-02  -.7263360E-03  -.6293615E-02  -.1160475E-01
  -.1609253E-01  -.1928373E-01  -.2116408E-01  -.2189251E-01  -.2174429E-01
  -.2127992E-01  -.2086711E-01  -.2056876E-01  -.2048897E-01  -.2026556E-01
  -.1942977E-01  -.1758784E-01  -.1461150E-01  -.1088381E-01  -.7105734E-02
  -.3647838E-02  -.3542823E-03   .2865633E-02   .5722501E-02   .7963490E-02
   .9567873E-02   .1045836E-01   .1040730E-01   .9227139E-02   .7057179E-02
   .4327214E-02   .1515238E-02  -.9150028E-03  -.2843810E-02  -.4667310E-02
  -.6884759E-02  -.9871979E-02  -.1371586E-01  -.1826934E-01  -.2306975E-01
  -.2754577E-01  -.3097094E-01  -.3267258E-01  -.3216481E-01  -.2977712E-01
  -.2623968E-01  -.2221796E-01  -.1813379E-01  -.1426198E-01  -.1103281E-01
  -.8672579E-02  -.6930396E-02  -.5041225E-02  -.2102041E-02   .2054707E-02
   .7100821E-02   .1238044E-01   .1677920E-01   .1959016E-01   .2090164E-01
   .2152527E-01   .2235461E-01   .2397481E-01   .2635786E-01   .2882625E-01
   .3056656E-01   .3120546E-01   .3069763E-01   .2912831E-01   .2678859E-01
   .2413233E-01   .2171482E-01   .1990257E-01   .1886170E-01   .1855474E-01
   .1892663E-01   .1984618E-01   .2108892E-01   .2244988E-01   .2382071E-01
   .2524927E-01   .2700216E-01   .2925158E-01   .3192122E-01   .3478780E-01
   .3751711E-01   .3960428E-01   .4092870E-01   .4149956E-01   .4135840E-01
   .4089262E-01   .4061794E-01   .4085641E-01   .4129062E-01   .4116113E-01
   .3977951E-01   .3693147E-01   .3299935E-01   .2861463E-01   .2436578E-01
   .2069301E-01   .1773886E-01   .1548552E-01   .1364272E-01   .1166893E-01
   .9048371E-02   .5396801E-02   .8750641E-03  -.4235015E-02  -.9661724E-02
  -.1520280E-01  -.2063544E-01  -.2556485E-01  -.2962807E-01  -.3263900E-01
  -.3442386E-01  -.3515107E-01  -.3529315E-01  -.3547940E-01  -.3623836E-01
  -.3729056E-01  -.3811542E-01  -.3835508E-01  -.3782580E-01  -.3667266E-01
  -.3531353E-01  -.3429042E-01  -.3384195E-01  -.3384597E-01  -.3412588E-01
  -.3461998E-01  -.3521228E-01  -.3608208E-01  -.3748206E-01  -.3934297E-01
  -.4158964E-01  -.4402383E-01  -.4625513E-01  -.4817025E-01  -.5009366E-01
  -.5220487E-01  -.5418579E-01  -.5542850E-01  -.5541059E-01  -.5398684E-01
  -.5152211E-01  -.4858501E-01  -.4541519E-01  -.4177626E-01  -.3766831E-01
  -.3320975E-01  -.2845237E-01  -.2366402E-01  -.1896268E-01  -.1401805E-01
  -.8488302E-02  -.2518066E-02   .3735647E-02   .1033262E-01   .1704188E-01
   .2376329E-01   .3041135E-01   .3664481E-01   .4188024E-01   .4557994E-01
   .4761678E-01   .4802969E-01   .4712920E-01   .4527152E-01   .4284257E-01
   .4027669E-01   .3792877E-01   .3578594E-01   .3376211E-01   .3159003E-01
   .2898385E-01   .2571239E-01   .2183287E-01   .1760385E-01   .1341178E-01
   .9788291E-02   .7219981E-02   .5890464E-02   .5522629E-02   .5708273E-02
   .6202172E-02   .6889115E-02   .7983695E-02   .9456164E-02   .1119084E-01
   .1325725E-01   .1568013E-01   .1825733E-01   .2059316E-01   .2247724E-01
   .2386480E-01   .2468823E-01   .2490842E-01   .2435924E-01   .2286388E-01
   .2035248E-01   .1697607E-01   .1363517E-01   .1096399E-01   .8884665E-02
   .7173313E-02   .5548835E-02   .3729247E-02   .1793756E-02  -.3747298E-04
  -.1642776E-02  -.3037365E-02  -.4110880E-02  -.4439463E-02  -.3837973E-02
  -.2220469E-02   .5735011E-03   .4031616E-02   .7463434E-02   .1042704E-01
   .1269131E-01   .1432158E-01   .1541490E-01   .1584106E-01   .1555664E-01
   .1435403E-01   .1225714E-01   .9589768E-02   .6835096E-02   .4473027E-02
   .2581914E-02   .9471804E-03  -.2849399E-03  -.1089803E-02  -.1831670E-02
  -.2946792E-02  -.4757825E-02  -.7351653E-02  -.1082790E-01  -.1536521E-01
  -.2100936E-01  -.2727814E-01  -.3313942E-01  -.3777400E-01  -.4103595E-01
  -.4318253E-01  -.4458945E-01  -.4534207E-01  -.4531082E-01  -.4444217E-01
  -.4292740E-01  -.4125411E-01  -.3943158E-01  -.3727719E-01  -.3455063E-01
  -.3104262E-01  -.2700508E-01  -.2257766E-01  -.1802095E-01  -.1368791E-01
  -.9912122E-02  -.6726256E-02  -.3915273E-02  -.1337217E-02   .9044528E-03
   .2654339E-02   .3951545E-02   .5360524E-02   .7336070E-02   .9915221E-02
   .1284755E-01   .1571934E-01   .1798942E-01   .1928058E-01   .1967872E-01
   .1948665E-01   .1894978E-01   .1835816E-01   .1776532E-01   .1719144E-01
   .1656532E-01   .1596960E-01   .1548879E-01   .1498654E-01   .1440306E-01
   .1353949E-01   .1206112E-01   .9949213E-02   .7744122E-02   .6226325E-02
   .5843956E-02   .6292188E-02   .6919088E-02   .7266510E-02   .7252032E-02
   .7048741E-02   .6859941E-02   .6792940E-02   .6849948E-02   .7107472E-02
   .7990412E-02   .9777614E-02   .1231854E-01   .1508930E-01   .1732514E-01
   .1880305E-01   .1977443E-01   .2032690E-01   .2028298E-01   .1957631E-01
   .1815188E-01   .1597933E-01   .1307518E-01   .9798613E-02   .6835053E-02
   .4610884E-02   .3094289E-02   .2139230E-02   .1455521E-02   .1096071E-02
   .1143536E-02   .1628589E-02   .2480261E-02   .3097963E-02   .2909026E-02
   .1884435E-02   .4113926E-03  -.8855942E-03  -.1582865E-02  -.1663431E-02
  -.1179083E-02  -.2445597E-03   .7258603E-03   .1325528E-02   .1532110E-02
   .1746590E-02   .2343148E-02   .3231737E-02   .4252976E-02   .5382924E-02
   .6578421E-02   .7759237E-02   .8551562E-02   .8433908E-02   .6830403E-02
   .3577508E-02  -.6940233E-03  -.5028113E-02  -.8714293E-02  -.1161804E-01
  -.1367187E-01  -.1463883E-01  -.1467373E-01  -.1436445E-01  -.1434984E-01
  -.1500863E-01  -.1626902E-01  -.1779024E-01  -.1909068E-01  -.1981991E-01
  -.1999595E-01  -.1987795E-01  -.1973506E-01  -.1969977E-01  -.1976600E-01
  -.1983824E-01  -.1971444E-01  -.1950014E-01  -.1947032E-01  -.1964009E-01
  -.2004169E-01  -.2063004E-01  -.2132296E-01  -.2200906E-01  -.2251568E-01
  -.2293753E-01  -.2338536E-01  -.2374226E-01  -.2372719E-01  -.2308125E-01
  -.2168595E-01  -.1962486E-01  -.1718903E-01  -.1487213E-01  -.1302377E-01
  -.1143888E-01  -.1008949E-01  -.9156700E-02  -.8542109E-02  -.7826510E-02
  -.6479117E-02  -.4151898E-02  -.1171885E-02   .1667994E-02   .3645727E-02
   .4562556E-02   .4524644E-02   .4076339E-02   .3749991E-02   .4031330E-02
   .5335948E-02   .7452042E-02   .9702096E-02   .1160864E-01   .1322342E-01
   .1484542E-01   .1651279E-01   .1816269E-01   .1987030E-01   .2173719E-01
   .2362725E-01   .2565432E-01   .2816063E-01   .3121023E-01   .3465013E-01
   .3807997E-01   .4122449E-01   .4401475E-01   .4642492E-01   .4829534E-01
   .4943419E-01   .4988564E-01   .4971667E-01   .4879351E-01   .4719091E-01
   .4481413E-01   .4150780E-01   .3777979E-01   .3423608E-01   .3125106E-01
   .2911030E-01   .2794912E-01   .2755997E-01   .2744598E-01   .2700424E-01
   .2578041E-01   .2349447E-01   .2047888E-01   .1728956E-01   .1428753E-01
   .1154272E-01   .9026082E-02   .6818047E-02   .4868946E-02   .2848731E-02
   .4957030E-03  -.2187806E-02  -.5150028E-02  -.8391356E-02  -.1158747E-01
  -.1435571E-01  -.1679035E-01  -.1919344E-01  -.2176763E-01  -.2454534E-01
  -.2753619E-01  -.3069168E-01  -.3353054E-01  -.3571150E-01  -.3728628E-01
  -.3843346E-01  -.3907376E-01  -.3909172E-01  -.3875681E-01  -.3841887E-01
  -.3816995E-01  -.3777665E-01  -.3707659E-01  -.3622303E-01  -.3526766E-01
  -.3409565E-01  -.3259595E-01  -.3101729E-01  -.2945980E-01  -.2820721E-01
  -.2767049E-01  -.2829040E-01  -.3011560E-01  -.3275913E-01  -.3563322E-01
  -.3805456E-01  -.3945249E-01  -.3964041E-01  -.3895165E-01  -.3749584E-01
  -.3509199E-01  -.3175972E-01  -.2781096E-01  -.2366394E-01  -.1965826E-01
  -.1568977E-01  -.1186623E-01  -.8478981E-02  -.5861093E-02  -.4281598E-02
  -.3663411E-02  -.3695249E-02  -.4146568E-02  -.4531244E-02  -.4069815E-02
  -.2403121E-02   .1732577E-03   .3047744E-02   .5781223E-02   .8035821E-02
   .9455446E-02   .9790059E-02   .9151506E-02   .8162445E-02   .7493657E-02
   .7628105E-02   .8857528E-02   .1116735E-01   .1460126E-01   .1910987E-01
   .2435989E-01   .2981819E-01   .3445620E-01   .3733552E-01   .3837004E-01
   .3802616E-01   .3695880E-01   .3600613E-01   .3607511E-01   .3743980E-01
   .4016652E-01   .4377382E-01   .4745300E-01   .5091731E-01   .5412522E-01
   .5700170E-01   .5917798E-01   .6037949E-01   .6076257E-01   .6072002E-01
   .6060268E-01   .6055378E-01   .6035857E-01   .5953016E-01   .5777009E-01
   .5518817E-01   .5176359E-01   .4719004E-01   .4134618E-01   .3425711E-01
   .2643669E-01   .1841007E-01   .1038754E-01   .2529114E-02  -.4916738E-02
  -.1145257E-01  -.1681706E-01  -.2105036E-01  -.2426972E-01  -.2703421E-01
  -.3027106E-01  -.3421155E-01  -.3843144E-01  -.4238695E-01  -.4537275E-01
  -.4690675E-01  -.4689095E-01  -.4578932E-01  -.4418144E-01  -.4223544E-01
  -.4017780E-01  -.3832166E-01  -.3695444E-01  -.3616957E-01  -.3543197E-01
  -.3382947E-01  -.3084792E-01  -.2671035E-01  -.2208272E-01  -.1754765E-01
  -.1345936E-01  -.1002493E-01  -.7403640E-02  -.5664461E-02  -.4452026E-02
  -.3447532E-02  -.2408200E-02  -.1156843E-02   .7407568E-04   .9422257E-03
   .9614865E-03  -.2232060E-03  -.2817994E-02  -.6669451E-02  -.1132048E-01
  -.1594900E-01  -.1971499E-01  -.2223110E-01  -.2361778E-01  -.2405424E-01
  -.2381781E-01  -.2342970E-01  -.2337892E-01  -.2395456E-01  -.2506707E-01
  -.2655911E-01  -.2836448E-01  -.3010524E-01  -.3128430E-01  -.3165879E-01
  -.3106072E-01  -.2923071E-01  -.2598302E-01  -.2174218E-01  -.1708271E-01
  -.1241384E-01  -.8248663E-02  -.4593688E-02  -.9441589E-03   .2906605E-02
   .7061310E-02   .1102560E-01   .1414504E-01   .1624832E-01   .1763750E-01
   .1865810E-01   .1938335E-01   .1981532E-01   .2000880E-01   .2005634E-01
   .2004606E-01   .1996761E-01   .1957757E-01   .1877487E-01   .1789544E-01
   .1730283E-01   .1723282E-01   .1792317E-01   .1914775E-01   .2073211E-01
   .2246350E-01   .2417747E-01   .2589849E-01   .2739826E-01   .2841239E-01
   .2844472E-01   .2728992E-01   .2489976E-01   .2154689E-01   .1790820E-01
   .1463016E-01   .1202853E-01   .9911081E-02   .7982977E-02   .5905552E-02
   .3464423E-02   .7358306E-03  -.1992932E-02  -.4402636E-02  -.6501085E-02
  -.8173127E-02  -.9359557E-02  -.9939016E-02  -.1016554E-01  -.1036119E-01
  -.1061637E-01  -.1111475E-01  -.1203328E-01  -.1349392E-01  -.1515536E-01
  -.1680492E-01  -.1821772E-01  -.1928771E-01  -.2004982E-01  -.2069166E-01
  -.2127407E-01  -.2170766E-01  -.2186663E-01  -.2129894E-01  -.1968909E-01
  -.1728451E-01  -.1491342E-01  -.1290046E-01  -.1095256E-01  -.8775565E-02
  -.6495288E-02  -.4385248E-02  -.2389871E-02  -.4786462E-03   .1226654E-02
   .2551639E-02   .3819900E-02   .5550913E-02   .7868276E-02   .1031952E-01
   .1217762E-01   .1307266E-01   .1306344E-01   .1183638E-01   .8970293E-02
   .4719722E-02  -.5356691E-03  -.6279175E-02  -.1153957E-01  -.1562462E-01
  -.1837558E-01  -.1983938E-01  -.2002730E-01  -.1873790E-01  -.1599425E-01
  -.1231862E-01  -.8131057E-02  -.3706315E-02   .4925012E-03   .4106159E-02
   .7119128E-02   .9575132E-02   .1132064E-01   .1223721E-01   .1230792E-01
   .1161289E-01   .1038193E-01   .8723799E-02   .6639374E-02   .4380206E-02
   .2283678E-02   .3715168E-03  -.1265903E-02  -.2319453E-02  -.2550556E-02
  -.1904591E-02  -.4493871E-03   .1693475E-02   .4276282E-02   .7047916E-02
   .9837256E-02   .1256348E-01   .1506459E-01   .1712088E-01   .1857233E-01
   .1951635E-01   .2014197E-01   .2034278E-01   .2010203E-01   .1970280E-01
   .1938637E-01   .1905337E-01   .1844572E-01   .1761877E-01   .1673342E-01
   .1594341E-01   .1544127E-01   .1528398E-01   .1552365E-01   .1607079E-01
   .1676367E-01   .1740993E-01   .1759838E-01   .1691975E-01   .1525114E-01
   .1277508E-01   .9679098E-02   .6233109E-02   .3275213E-02   .1533421E-02
   .1017333E-02   .1349856E-02   .2024670E-02   .2377266E-02   .1939412E-02
   .7606375E-03  -.7910033E-03  -.2230847E-02  -.3242291E-02  -.3720101E-02
  -.3313915E-02  -.1794136E-02   .7831417E-03   .4209199E-02   .7980052E-02
   .1135942E-01   .1370603E-01   .1480176E-01   .1482062E-01   .1390185E-01
   .1213551E-01   .9729988E-02   .6855596E-02   .3796644E-02   .1126987E-02
  -.8803948E-03  -.2358979E-02  -.3614261E-02  -.4923449E-02  -.6653867E-02
  -.8996738E-02  -.1149034E-01  -.1392403E-01  -.1639887E-01  -.1882352E-01
  -.2125087E-01  -.2349088E-01  -.2503225E-01  -.2543486E-01  -.2468125E-01
  -.2326153E-01  -.2164691E-01  -.2047541E-01  -.2015293E-01  -.2075679E-01
  -.2184989E-01  -.2275549E-01  -.2298539E-01  -.2231345E-01  -.2052515E-01
  -.1739326E-01  -.1331683E-01  -.9055701E-02  -.5317293E-02  -.2570805E-02
  -.1083707E-02  -.6273811E-03  -.6869099E-03  -.8147715E-03  -.7974462E-03
  -.5172317E-03   .1898511E-04   .3856415E-03   .1009487E-03  -.9280367E-03
  -.2554123E-02  -.4537493E-02  -.6487689E-02  -.8319030E-02  -.1029809E-01
  -.1247663E-01  -.1442998E-01  -.1567458E-01  -.1598152E-01  -.1521618E-01
  -.1341032E-01  -.1090046E-01  -.8228474E-02  -.5801317E-02  -.3655745E-02
  -.1677114E-02   .4065693E-03   .2747664E-02   .5367595E-02   .8175611E-02
   .1104220E-01   .1388576E-01   .1668601E-01   .1933908E-01   .2148871E-01
   .2276358E-01   .2298893E-01   .2209240E-01   .2036667E-01   .1809049E-01
   .1549634E-01   .1277536E-01   .1003149E-01   .7400651E-02   .5128517E-02
   .3317927E-02   .1959640E-02   .1119396E-02   .7599389E-03   .8110737E-03
   .1331572E-02   .2200851E-02   .3012276E-02   .3480869E-02   .3487455E-02
   .2805555E-02   .1346238E-02  -.4993312E-03  -.2380924E-02  -.4146632E-02
  -.5322156E-02  -.5467729E-02  -.4525671E-02  -.2743986E-02  -.6097808E-03
   .1774010E-02   .4553846E-02   .7484990E-02   .1010868E-01   .1228831E-01
   .1386338E-01   .1490458E-01   .1550869E-01   .1569172E-01   .1533807E-01
   .1442515E-01   .1311926E-01   .1158987E-01   .9846014E-02   .8039087E-02
   .6367725E-02   .4887999E-02   .3540265E-02   .2232584E-02   .9581503E-03
  -.1893942E-03  -.1453012E-02  -.3013768E-02  -.4926196E-02  -.7025737E-02
  -.9197147E-02  -.1124930E-01  -.1303124E-01  -.1453294E-01  -.1578411E-01
  -.1652519E-01  -.1625978E-01  -.1495920E-01  -.1294863E-01  -.1074355E-01
  -.8690529E-02  -.7216756E-02  -.6612076E-02  -.6942368E-02  -.7926897E-02
  -.8946684E-02  -.9523025E-02  -.9518348E-02  -.8894186E-02  -.7689759E-02
  -.5968355E-02  -.4055178E-02  -.2291268E-02  -.5587991E-03   .1389061E-02
   .3276761E-02   .5048262E-02   .6739722E-02   .8121532E-02   .9153545E-02
   .9904294E-02   .1055972E-01   .1114963E-01   .1154124E-01   .1164364E-01
   .1124650E-01   .1003709E-01   .7950948E-02   .5254423E-02   .2260362E-02
  -.1134855E-02  -.4740360E-02  -.7898409E-02  -.1017471E-01  -.1143871E-01
  -.1186906E-01  -.1184360E-01  -.1148608E-01  -.1079466E-01  -.9991587E-02
  -.9219704E-02  -.8802283E-02  -.8887157E-02  -.9436703E-02  -.1017569E-01
  -.1092606E-01  -.1157461E-01  -.1221312E-01  -.1302478E-01  -.1389782E-01
  -.1474985E-01  -.1542524E-01  -.1550952E-01  -.1457634E-01  -.1251036E-01
  -.9255519E-02  -.5103233E-02  -.6022860E-03   .3966103E-02   .8148391E-02
   .1160345E-01   .1444142E-01   .1678859E-01   .1849696E-01   .1925521E-01
   .1898772E-01   .1812501E-01   .1715176E-01   .1636552E-01   .1595636E-01
   .1587947E-01   .1596642E-01   .1605473E-01   .1604697E-01   .1579044E-01
   .1528627E-01   .1458188E-01   .1346264E-01   .1185062E-01   .9858959E-02
   .7721746E-02   .5782949E-02   .4339094E-02   .3351917E-02   .2449487E-02
   .1337595E-02  -.4309396E-04  -.1586508E-02  -.3141285E-02  -.4626941E-02
  -.6191158E-02  -.7914044E-02  -.9641571E-02  -.1121363E-01  -.1240307E-01
  -.1288902E-01  -.1270722E-01  -.1229418E-01  -.1201852E-01  -.1199213E-01
  -.1215640E-01  -.1255361E-01  -.1331179E-01  -.1440069E-01  -.1553012E-01
  -.1649860E-01  -.1721659E-01  -.1742204E-01  -.1707991E-01  -.1637230E-01
  -.1557546E-01  -.1500818E-01  -.1477995E-01  -.1479747E-01  -.1487195E-01
  -.1471817E-01  -.1423435E-01  -.1350440E-01  -.1269199E-01  -.1191496E-01
  -.1125138E-01  -.1086870E-01  -.1095636E-01  -.1145505E-01  -.1202168E-01
  -.1236281E-01  -.1223677E-01  -.1148900E-01  -.1008124E-01  -.8352205E-02
  -.6605867E-02  -.4893653E-02  -.3465547E-02  -.2570324E-02  -.2197240E-02
  -.2166325E-02  -.2422608E-02  -.2879176E-02  -.3269493E-02  -.3291366E-02
  -.2912886E-02  -.2402560E-02  -.1855072E-02  -.1316091E-02  -.9365903E-03
  -.8013896E-03  -.1046638E-02  -.1802286E-02  -.3002109E-02  -.4577664E-02
  -.6216992E-02  -.7557484E-02  -.8452296E-02  -.8847910E-02  -.8689720E-02
  -.7925954E-02  -.6510170E-02  -.4490976E-02  -.2262966E-02  -.4998844E-03
   .2047259E-03  -.2805693E-03  -.1583633E-02  -.3141885E-02  -.4406062E-02
  -.5062261E-02  -.5192286E-02  -.5083891E-02  -.4965388E-02  -.4738052E-02
  -.4133281E-02  -.3036799E-02  -.1381626E-02   .8552313E-03   .3569557E-02
   .6866878E-02   .1068717E-01   .1481558E-01   .1897125E-01   .2269709E-01
   .2567200E-01   .2783248E-01   .2938572E-01   .3051256E-01   .3141714E-01
   .3237170E-01   .3332176E-01   .3399646E-01   .3424705E-01   .3397300E-01
   .3312870E-01   .3185421E-01   .3040650E-01   .2915235E-01   .2839308E-01
   .2814189E-01   .2832153E-01   .2854804E-01   .2823130E-01   .2697361E-01
   .2454003E-01   .2084223E-01   .1605502E-01   .1064018E-01   .5238546E-02
   .3834355E-03  -.3496517E-02  -.6135309E-02  -.7598046E-02  -.8162183E-02
  -.8241025E-02  -.8187921E-02  -.8177909E-02  -.8236433E-02  -.8315614E-02
  -.8366530E-02  -.8408226E-02  -.8645574E-02  -.9336844E-02  -.1052016E-01
  -.1221878E-01  -.1443689E-01  -.1704257E-01  -.1984614E-01  -.2268084E-01
  -.2546639E-01  -.2817627E-01  -.3065972E-01  -.3275577E-01  -.3466689E-01
  -.3673755E-01  -.3895600E-01  -.4105683E-01  -.4301551E-01  -.4490818E-01
  -.4668427E-01  -.4843294E-01  -.5004913E-01  -.5116151E-01  -.5158901E-01
  -.5118751E-01  -.5010805E-01  -.4860934E-01  -.4665771E-01  -.4426686E-01
  -.4163205E-01  -.3931918E-01  -.3792167E-01  -.3766998E-01  -.3841571E-01
  -.3956119E-01  -.4043389E-01  -.4071757E-01  -.4019164E-01  -.3883812E-01
  -.3686924E-01  -.3430287E-01  -.3127503E-01  -.2813023E-01  -.2506944E-01
  -.2180157E-01  -.1817586E-01  -.1449707E-01  -.1072738E-01  -.6829956E-02
  -.2975596E-02   .5077934E-03   .3379801E-02   .5687478E-02   .7536595E-02
   .9067529E-02   .1026191E-01   .1102883E-01   .1155728E-01   .1204472E-01
   .1247470E-01   .1301783E-01   .1425090E-01   .1648625E-01   .1938733E-01
   .2248905E-01   .2564502E-01   .2884756E-01   .3213448E-01   .3546145E-01
   .3848385E-01   .4103671E-01   .4320031E-01   .4520410E-01   .4740494E-01
   .5014104E-01   .5354773E-01   .5735198E-01   .6134739E-01   .6531223E-01
   .6870749E-01   .7116644E-01   .7261757E-01   .7322083E-01   .7338086E-01
   .7377068E-01   .7471095E-01   .7613994E-01   .7791401E-01   .7973118E-01
   .8154709E-01   .8338561E-01   .8511104E-01   .8647597E-01   .8744157E-01
   .8812561E-01   .8855288E-01   .8874715E-01   .8862214E-01   .8819371E-01
   .8753050E-01   .8658596E-01   .8536981E-01   .8393522E-01   .8201387E-01
   .7922362E-01   .7557555E-01   .7137130E-01   .6679289E-01   .6184739E-01
   .5657954E-01   .5108342E-01   .4548075E-01   .3986642E-01   .3431469E-01
   .2914929E-01   .2446939E-01   .2016706E-01   .1603272E-01   .1190693E-01
   .7656331E-02   .2980895E-02  -.2205498E-02  -.7709979E-02  -.1296754E-01
  -.1772346E-01  -.2233337E-01  -.2685657E-01  -.3126078E-01  -.3548805E-01
  -.3931189E-01  -.4295160E-01  -.4662708E-01  -.4996213E-01  -.5257972E-01
  -.5444391E-01  -.5557724E-01  -.5609480E-01  -.5623228E-01  -.5622022E-01
  -.5623947E-01  -.5659820E-01  -.5770342E-01  -.5968145E-01  -.6224402E-01
  -.6478638E-01  -.6680678E-01  -.6806095E-01  -.6878773E-01  -.6929490E-01
  -.6987652E-01  -.7058085E-01  -.7144159E-01  -.7249339E-01  -.7350327E-01
  -.7437263E-01  -.7498807E-01  -.7507156E-01  -.7469783E-01  -.7426424E-01
  -.7427596E-01  -.7502314E-01  -.7662544E-01  -.7901131E-01  -.8210443E-01
  -.8579900E-01  -.8988059E-01  -.9408470E-01  -.9804153E-01  -.1014617E+00
  -.1041728E+00  -.1061727E+00  -.1076830E+00  -.1087738E+00  -.1094278E+00
  -.1097091E+00  -.1095269E+00  -.1087216E+00  -.1069034E+00  -.1036827E+00
  -.9924798E-01  -.9363811E-01  -.8681892E-01  -.7921905E-01  -.7106509E-01
  -.6249330E-01  -.5359175E-01  -.4450589E-01  -.3511983E-01  -.2552282E-01
  -.1565671E-01  -.5303956E-02   .5552376E-02   .1669802E-01   .2768364E-01
   .3811301E-01   .4768202E-01   .5595829E-01   .6275377E-01   .6800355E-01
   .7190963E-01   .7498958E-01   .7772792E-01   .8021194E-01   .8231762E-01
   .8402937E-01   .8549576E-01   .8713401E-01   .8926592E-01   .9190004E-01
   .9481725E-01   .9778008E-01   .1006001E+00   .1029870E+00   .1045433E+00
   .1048735E+00   .1036161E+00   .1009849E+00   .9753178E-01   .9387293E-01
   .9028028E-01   .8683673E-01   .8342265E-01   .8000052E-01   .7670541E-01
   .7358436E-01   .7060614E-01   .6768349E-01   .6456062E-01   .6124076E-01
   .5797867E-01   .5500969E-01   .5279729E-01   .5160330E-01   .5107673E-01
   .5099284E-01   .5117880E-01   .5137047E-01   .5143264E-01   .5135603E-01
   .5121964E-01   .5113983E-01   .5134233E-01   .5178543E-01   .5224642E-01
   .5277352E-01   .5358448E-01   .5476826E-01   .5642362E-01   .5838288E-01
   .6027147E-01   .6164978E-01   .6225600E-01   .6177577E-01   .6008266E-01
   .5726696E-01   .5354539E-01   .4889445E-01   .4335167E-01   .3668976E-01
   .2888829E-01   .2037055E-01   .1143654E-01   .2338813E-02  -.7016722E-02
  -.1664270E-01  -.2679638E-01  -.3711025E-01  -.4688945E-01  -.5582036E-01
  -.6393193E-01  -.7151719E-01  -.7856329E-01  -.8490985E-01  -.9034823E-01
  -.9469635E-01  -.9801796E-01  -.1004547E+00  -.1021801E+00  -.1031837E+00
  -.1033068E+00  -.1025992E+00  -.1013235E+00  -.9961580E-01  -.9709065E-01
  -.9371958E-01  -.8951983E-01  -.8463227E-01  -.7944393E-01  -.7412456E-01
  -.6922608E-01  -.6524868E-01  -.6227246E-01  -.6032012E-01  -.5906429E-01
  -.5806335E-01  -.5716618E-01  -.5630083E-01  -.5558374E-01  -.5510331E-01
  -.5473599E-01  -.5456023E-01  -.5440833E-01  -.5418770E-01  -.5397417E-01
  -.5377139E-01  -.5334500E-01  -.5250254E-01  -.5119821E-01  -.4928629E-01
  -.4661095E-01  -.4332957E-01  -.3953558E-01  -.3517007E-01  -.3042318E-01
  -.2548760E-01  -.2055435E-01  -.1561488E-01  -.1049412E-01  -.5142750E-02
   .1432887E-03   .5116005E-02   .1021179E-01   .1595736E-01   .2226308E-01
   .2888388E-01   .3569628E-01   .4254777E-01   .4893884E-01   .5465612E-01
   .5990863E-01   .6463704E-01   .6881503E-01   .7244240E-01   .7534458E-01
   .7742695E-01   .7859854E-01   .7853812E-01   .7732824E-01   .7527550E-01
   .7245306E-01   .6889132E-01   .6456724E-01   .5953185E-01   .5401720E-01
   .4831220E-01   .4260669E-01   .3704731E-01   .3205194E-01   .2778018E-01
   .2415340E-01   .2108651E-01   .1878850E-01   .1727657E-01   .1640273E-01
   .1600930E-01   .1585233E-01   .1555624E-01   .1500559E-01   .1419025E-01
   .1306081E-01   .1150130E-01   .9626734E-02   .7734258E-02   .5824284E-02
   .3946318E-02   .2173222E-02   .2990959E-03  -.1926242E-02  -.4532150E-02
  -.7407731E-02  -.1057270E-01  -.1388366E-01  -.1708383E-01  -.2007352E-01
  -.2289743E-01  -.2561679E-01  -.2807899E-01  -.3011388E-01  -.3167345E-01
  -.3249710E-01  -.3255642E-01  -.3203672E-01  -.3129603E-01  -.3053121E-01
  -.2982941E-01  -.2893574E-01  -.2789246E-01  -.2701815E-01  -.2627453E-01
  -.2544285E-01  -.2461130E-01  -.2401448E-01  -.2369475E-01  -.2337484E-01
  -.2291144E-01  -.2227065E-01  -.2177610E-01  -.2149590E-01  -.2151622E-01
  -.2183063E-01  -.2235452E-01  -.2277749E-01  -.2282792E-01  -.2257905E-01
  -.2208914E-01  -.2146726E-01  -.2092281E-01  -.2025164E-01  -.1931036E-01
  -.1822700E-01  -.1705673E-01  -.1600064E-01  -.1531888E-01  -.1502772E-01
  -.1479300E-01  -.1423105E-01  -.1339379E-01  -.1263075E-01  -.1201146E-01
  -.1147060E-01  -.1090306E-01  -.1026995E-01  -.9563060E-02  -.8829623E-02
  -.8092740E-02  -.7372671E-02  -.6661061E-02  -.5950083E-02  -.5229188E-02
  -.4501296E-02  -.3765773E-02  -.3063981E-02  -.2559439E-02  -.2292196E-02
  -.2011491E-02  -.1375320E-02  -.2887050E-03   .1106274E-02   .2593364E-02
   .4008077E-02   .5140820E-02   .5969428E-02   .6576968E-02   .6944488E-02
   .7091621E-02   .7082530E-02   .7027167E-02   .7157773E-02   .7569573E-02
   .8202780E-02   .8937769E-02   .9682385E-02   .1035773E-01   .1085751E-01
   .1150432E-01   .1266915E-01   .1445143E-01   .1680587E-01   .1955801E-01
   .2266270E-01   .2616826E-01   .2987553E-01   .3355112E-01   .3690769E-01
   .3976322E-01   .4231546E-01   .4469229E-01   .4696523E-01   .4914079E-01
   .5105880E-01   .5247391E-01   .5322847E-01   .5344473E-01   .5338903E-01
   .5328840E-01   .5322082E-01   .5301199E-01   .5242208E-01   .5157061E-01
   .5065374E-01   .4981614E-01   .4908484E-01   .4841982E-01   .4772765E-01
   .4680474E-01   .4557877E-01   .4412210E-01   .4241642E-01   .4052517E-01
   .3866414E-01   .3679835E-01   .3468214E-01   .3220249E-01   .2944918E-01
   .2658242E-01   .2373238E-01   .2094670E-01   .1820924E-01   .1548081E-01
   .1273334E-01   .9962527E-02   .7180926E-02   .4384842E-02   .1585939E-02
  -.1213159E-02  -.3999035E-02  -.6578234E-02  -.8744953E-02  -.1061507E-01
  -.1226878E-01  -.1384619E-01  -.1571018E-01  -.1788487E-01  -.2021986E-01
  -.2270097E-01  -.2530311E-01  -.2781552E-01  -.3012029E-01  -.3220943E-01
  -.3386169E-01  -.3501393E-01  -.3580131E-01  -.3644493E-01  -.3709680E-01
  -.3781502E-01  -.3857684E-01  -.3935008E-01  -.4027391E-01  -.4140281E-01
  -.4249997E-01  -.4322177E-01  -.4344923E-01  -.4315068E-01  -.4234102E-01
  -.4118063E-01  -.3973653E-01  -.3798753E-01  -.3599850E-01  -.3372971E-01
  -.3118717E-01  -.2848393E-01  -.2601205E-01  -.2422108E-01  -.2314093E-01
  -.2265858E-01  -.2252095E-01  -.2235319E-01  -.2191573E-01  -.2139567E-01
  -.2102495E-01  -.2073185E-01  -.2020735E-01  -.1940754E-01  -.1850690E-01
  -.1747973E-01  -.1615047E-01  -.1441380E-01  -.1238763E-01  -.1021132E-01
  -.8024553E-02  -.5717044E-02  -.3192724E-02  -.6163218E-03   .1783442E-02
   .3974341E-02   .5861735E-02   .7307800E-02   .8184919E-02   .8702536E-02
   .9324976E-02   .1020841E-01   .1136213E-01   .1290142E-01   .1463784E-01
   .1631654E-01   .1782536E-01   .1919881E-01   .2050192E-01   .2167493E-01
   .2263047E-01   .2342730E-01   .2412022E-01   .2480674E-01   .2549622E-01
   .2619260E-01   .2673805E-01   .2716805E-01   .2761548E-01   .2785411E-01
   .2753221E-01   .2671659E-01   .2573538E-01   .2466134E-01   .2333431E-01
   .2163350E-01   .1977463E-01   .1787107E-01   .1577864E-01   .1353767E-01
   .1142948E-01   .9504780E-02   .7617115E-02   .5821149E-02   .4062855E-02
   .2006548E-02  -.4694327E-03  -.3122587E-02  -.5500382E-02  -.7370133E-02
  -.8804437E-02  -.9918321E-02  -.1085471E-01  -.1194711E-01  -.1302257E-01
  -.1376354E-01  -.1418434E-01  -.1457320E-01  -.1497143E-01  -.1528608E-01
  -.1536645E-01  -.1507933E-01  -.1461867E-01  -.1405357E-01  -.1318558E-01
  -.1216796E-01  -.1106766E-01  -.9852071E-02  -.8429384E-02  -.6665452E-02
  -.4756318E-02  -.2954974E-02  -.1264277E-02   .5129824E-03   .2329864E-02
   .3953020E-02   .5063704E-02   .5672947E-02   .6115710E-02   .6611457E-02
   .7400255E-02   .8458333E-02   .9508515E-02   .1042627E-01   .1115531E-01
   .1179726E-01   .1230103E-01   .1258957E-01   .1258261E-01   .1220175E-01
   .1157125E-01   .1071497E-01   .9737565E-02   .8934329E-02   .8481491E-02
   .8206642E-02   .7603545E-02   .6636941E-02   .5456586E-02   .4155563E-02
   .2804257E-02   .1447312E-02   .1007206E-03  -.1173397E-02  -.2210118E-02
  -.3113411E-02  -.4116229E-02  -.5343659E-02  -.6752735E-02  -.8226728E-02
  -.9679720E-02  -.1114629E-01  -.1281561E-01  -.1456248E-01  -.1602184E-01
  -.1716045E-01  -.1814009E-01  -.1891155E-01  -.1938572E-01  -.1965875E-01
  -.2001871E-01  -.2048544E-01  -.2089978E-01  -.2107414E-01  -.2074932E-01
  -.1977377E-01  -.1813748E-01  -.1618221E-01  -.1432113E-01  -.1273438E-01
  -.1138004E-01  -.1019050E-01  -.9209386E-02  -.8285934E-02  -.7300846E-02
  -.6441423E-02  -.5912333E-02  -.5728161E-02  -.5749074E-02  -.5824963E-02
  -.5905057E-02  -.6131141E-02  -.6285859E-02  -.6184902E-02  -.5900016E-02
  -.5366965E-02  -.4511988E-02  -.3602523E-02  -.2938305E-02  -.2427663E-02
  -.1984147E-02  -.1647128E-02  -.1246193E-02  -.7241267E-03  -.1268728E-04
   .1017226E-02   .2532217E-02   .4421532E-02   .6525861E-02   .8565712E-02
   .1010296E-01   .1109674E-01   .1167630E-01   .1191031E-01   .1173140E-01
   .1128454E-01   .1087068E-01   .1063843E-01   .1054356E-01   .1030623E-01
   .9869462E-02   .9394192E-02   .8846636E-02   .8281535E-02   .7868985E-02
   .7646162E-02   .7386563E-02   .6982782E-02   .6606422E-02   .6565758E-02
   .6945826E-02   .7621290E-02   .8388730E-02   .9125823E-02   .9771633E-02
   .1019657E-01   .1040410E-01   .1064367E-01   .1108287E-01   .1169735E-01
   .1202362E-01   .1167645E-01   .1078491E-01   .9550738E-02   .8176416E-02
   .6818332E-02   .5684155E-02   .4792369E-02   .3918519E-02   .3052884E-02
   .2349646E-02   .1584203E-02   .5953121E-03  -.5162999E-03  -.1737436E-02
  -.3040694E-02  -.4372133E-02  -.5513553E-02  -.6250998E-02  -.6731045E-02
  -.7165569E-02  -.7538856E-02  -.7759418E-02  -.7649907E-02  -.7213511E-02
  -.6725457E-02  -.6410460E-02  -.6340360E-02  -.6584851E-02  -.7093928E-02
  -.7766962E-02  -.8456845E-02  -.8916607E-02  -.8912105E-02  -.8446653E-02
  -.7687635E-02  -.6691730E-02  -.5504186E-02  -.4211593E-02  -.3042413E-02
  -.2094475E-02  -.1333353E-02  -.6728598E-03   .9972156E-04   .1000212E-02
   .1748111E-02   .2155126E-02   .2249688E-02   .2175765E-02   .2055810E-02
   .1804741E-02   .1192481E-02   .3002653E-03  -.4883014E-03  -.9401506E-03
  -.1211405E-02  -.1697846E-02  -.2466096E-02  -.3181997E-02  -.3453502E-02
  -.3148240E-02  -.2594820E-02  -.2141582E-02  -.1806533E-02  -.1443723E-02
  -.1119455E-02  -.9163537E-03  -.8348368E-03  -.8256628E-03  -.8335864E-03
  -.8265451E-03  -.7922774E-03  -.6230093E-03  -.3440407E-03  -.1275385E-03
   .1292894E-03   .3839422E-03   .5710916E-03   .7891554E-03   .1054860E-02
   .1235545E-02   .1455107E-02   .1681224E-02   .1691130E-02   .1198088E-02
   .3014353E-03  -.6759417E-03  -.1556314E-02  -.2278220E-02  -.2914159E-02
  -.3383037E-02  -.3647521E-02  -.3749920E-02  -.3769648E-02  -.3765414E-02
  -.3666936E-02  -.3314534E-02  -.2751311E-02  -.1944023E-02  -.8581445E-03
   .4511643E-03   .1856460E-02   .3165891E-02   .4076310E-02   .4569515E-02
   .4944471E-02   .5283263E-02   .5437863E-02   .5214114E-02   .4768213E-02
   .4360254E-02   .4017921E-02   .3482786E-02   .2681716E-02   .2006886E-02
   .1879150E-02   .2282065E-02   .3047364E-02   .3877971E-02   .4741493E-02
   .5740229E-02   .6921450E-02   .8149534E-02   .9190190E-02   .1011061E-01
   .1099962E-01   .1170016E-01   .1208626E-01   .1219173E-01   .1213829E-01
   .1191267E-01   .1123593E-01   .1029762E-01   .9464523E-02   .8708255E-02
   .7892501E-02   .7158495E-02   .6694077E-02   .6577698E-02   .6814851E-02
   .7021894E-02   .6982692E-02   .6787788E-02   .6598851E-02   .6509219E-02
   .6518660E-02   .6569940E-02   .6540776E-02   .6165746E-02   .5374225E-02
   .4505418E-02   .3850800E-02   .3260464E-02   .2452027E-02   .1300084E-02
  -.1893648E-03  -.2087089E-02  -.4279423E-02  -.6288774E-02  -.7985898E-02
  -.9281307E-02  -.1029640E-01  -.1125536E-01  -.1208229E-01  -.1261219E-01
  -.1283039E-01  -.1291734E-01  -.1325415E-01  -.1402794E-01  -.1500069E-01
  -.1602953E-01  -.1706175E-01  -.1788092E-01  -.1832614E-01  -.1840532E-01
  -.1808737E-01  -.1751354E-01  -.1676487E-01  -.1579139E-01  -.1460113E-01
  -.1327675E-01  -.1190112E-01  -.1051685E-01  -.9101120E-02  -.7463346E-02
  -.5678538E-02  -.4177887E-02  -.3057174E-02  -.2084240E-02  -.1211886E-02
  -.3554146E-03   .6608289E-03   .1865511E-02   .3000149E-02   .3953191E-02
   .4680476E-02   .5273084E-02   .5821567E-02   .6222108E-02   .6406754E-02
   .6394894E-02   .6115007E-02   .5580162E-02   .4864013E-02   .4073378E-02
   .3268260E-02   .2352821E-02   .1438445E-02   .7840571E-03   .4865134E-03
   .4557687E-03   .5295053E-03   .5806578E-03   .5804628E-03   .7231125E-03
   .1127658E-02   .1760922E-02   .2476587E-02   .3011227E-02   .3251128E-02
   .3239686E-02   .2971738E-02   .2650990E-02   .2466036E-02   .2251638E-02
   .1872330E-02   .1279984E-02   .6764607E-03   .1144388E-03  -.4658123E-03
  -.9144776E-03  -.9855117E-03  -.4698620E-03   .4722918E-03   .1481715E-02
   .2352556E-02   .2903346E-02   .3250098E-02   .3647056E-02   .4191131E-02
   .4880732E-02   .5482950E-02   .5838469E-02   .6077512E-02   .6437514E-02
   .6856293E-02   .7321568E-02   .7889991E-02   .8519403E-02   .9299341E-02
   .1021537E-01   .1098708E-01   .1131489E-01   .1106750E-01   .1044788E-01
   .9558682E-02   .8455321E-02   .7103611E-02   .5514494E-02   .3955282E-02
   .2470804E-02   .1235049E-02   .1711088E-03  -.9195413E-03  -.2143703E-02
  -.3396143E-02  -.4457470E-02  -.5407245E-02  -.6324500E-02  -.7046768E-02
  -.7548759E-02  -.8030192E-02  -.8477732E-02  -.8680655E-02  -.8440628E-02
  -.7966723E-02  -.7576140E-02  -.7439318E-02  -.7613376E-02  -.8200036E-02
  -.8998253E-02  -.9546775E-02  -.9876989E-02  -.1009951E-01  -.1024866E-01
  -.1034911E-01  -.1042482E-01  -.1050324E-01  -.1058198E-01  -.1064360E-01
  -.1067852E-01  -.1068519E-01  -.1066917E-01  -.1065217E-01  -.1056636E-01
  -.1023229E-01  -.9678938E-02  -.8966405E-02  -.8299674E-02  -.7805628E-02
  -.7259732E-02  -.6398887E-02  -.5179015E-02  -.3736863E-02  -.2222820E-02
  -.6691508E-03   .1063138E-02   .2897016E-02   .4575072E-02   .5844814E-02
   .6820289E-02   .7730483E-02   .8514348E-02   .9031165E-02   .9337621E-02
   .9770626E-02   .1058464E-01   .1171489E-01   .1279124E-01   .1371015E-01
   .1464289E-01   .1571448E-01   .1671501E-01   .1736274E-01   .1760346E-01
   .1757559E-01   .1746177E-01   .1738413E-01   .1737317E-01   .1736352E-01
   .1714501E-01   .1692240E-01   .1692102E-01   .1707530E-01   .1724876E-01
   .1735002E-01   .1736602E-01   .1733127E-01   .1725279E-01   .1692581E-01
   .1619497E-01   .1532016E-01   .1464102E-01   .1406733E-01   .1334148E-01
   .1251319E-01   .1159602E-01   .1053458E-01   .9480071E-02   .8309559E-02
   .7040618E-02   .5626170E-02   .4201540E-02   .2755376E-02   .1414156E-02
   .2618716E-03  -.8392291E-03  -.2011248E-02  -.3271877E-02  -.4372929E-02
  -.5131469E-02  -.5921144E-02  -.6837294E-02  -.7612337E-02  -.8240976E-02
  -.8951736E-02  -.9730836E-02  -.1035151E-01  -.1071200E-01  -.1099545E-01
  -.1136074E-01  -.1174325E-01  -.1219622E-01  -.1273455E-01  -.1320937E-01
  -.1370380E-01  -.1443537E-01  -.1529992E-01  -.1599566E-01  -.1652894E-01
  -.1699876E-01  -.1733681E-01  -.1750967E-01  -.1755459E-01  -.1754069E-01
  -.1752378E-01  -.1752813E-01  -.1755367E-01  -.1758413E-01  -.1757816E-01
  -.1736950E-01  -.1690375E-01  -.1622107E-01  -.1530065E-01  -.1434962E-01
  -.1365974E-01  -.1317166E-01  -.1271383E-01  -.1215741E-01  -.1151256E-01
  -.1099113E-01  -.1069535E-01  -.1043446E-01  -.1005593E-01  -.9646389E-02
  -.9146051E-02  -.8381155E-02  -.7453522E-02  -.6514953E-02  -.5658616E-02
  -.4877643E-02  -.3972941E-02  -.2848899E-02  -.1699702E-02  -.6770547E-03
   .3252751E-03   .1455369E-02   .2755588E-02   .4166340E-02   .5586716E-02
   .6934377E-02   .8053983E-02   .8918185E-02   .9595963E-02   .1018790E-01
   .1082152E-01   .1138117E-01   .1187288E-01   .1240064E-01   .1286810E-01
   .1328904E-01   .1365385E-01   .1386508E-01   .1410088E-01   .1435856E-01
   .1457458E-01   .1485415E-01   .1544899E-01   .1632190E-01   .1725195E-01
   .1823281E-01   .1918376E-01   .1987695E-01   .2035916E-01   .2094812E-01
   .2158539E-01   .2187674E-01   .2167129E-01   .2103276E-01   .2007623E-01
   .1886069E-01   .1767345E-01   .1653558E-01   .1535382E-01   .1407445E-01
   .1269323E-01   .1126962E-01   .9990371E-02   .8988331E-02   .8066495E-02
   .7004231E-02   .5744112E-02   .4460466E-02   .3226911E-02   .1933593E-02
   .7320461E-03  -.3982674E-03  -.1415107E-02  -.2116704E-02  -.2444610E-02
  -.2622269E-02  -.2794243E-02  -.2786563E-02  -.2644266E-02  -.2492271E-02
  -.2282021E-02  -.2017112E-02  -.1828249E-02  -.1592164E-02  -.1353478E-02
  -.1189163E-02  -.1118949E-02  -.1130081E-02  -.1323757E-02  -.1786668E-02
  -.2298990E-02  -.2647188E-02  -.2786935E-02  -.2797895E-02  -.2771065E-02
  -.2762972E-02  -.2790630E-02  -.2833794E-02  -.2843710E-02  -.2690088E-02
  -.2267521E-02  -.1779043E-02  -.1439886E-02  -.1314188E-02  -.1349647E-02
  -.1574286E-02  -.2030685E-02  -.2507741E-02  -.2804902E-02  -.2876403E-02
  -.2804806E-02  -.2716851E-02  -.2679107E-02  -.2704506E-02  -.2894123E-02
  -.3326704E-02  -.3797805E-02  -.4116403E-02  -.4335718E-02  -.4681316E-02
  -.5101940E-02  -.5545433E-02  -.6186806E-02  -.7057508E-02  -.7984716E-02
  -.8975333E-02  -.9951342E-02  -.1070099E-01  -.1130724E-01  -.1215859E-01
  -.1310302E-01  -.1391305E-01  -.1460489E-01  -.1510668E-01  -.1536653E-01
  -.1543575E-01  -.1540816E-01  -.1527427E-01  -.1500909E-01  -.1481078E-01
  -.1447167E-01  -.1384251E-01  -.1316208E-01  -.1269622E-01  -.1250912E-01
  -.1241830E-01  -.1213852E-01  -.1171531E-01  -.1134235E-01  -.1103569E-01
  -.1073492E-01  -.1056722E-01  -.1038502E-01  -.1017498E-01  -.1011371E-01
  -.1039864E-01  -.1086522E-01  -.1126067E-01  -.1147188E-01  -.1152048E-01
  -.1149095E-01  -.1146444E-01  -.1147774E-01  -.1142807E-01  -.1110885E-01
  -.1054408E-01  -.9715590E-02  -.8740262E-02  -.7942373E-02  -.7413088E-02
  -.6850023E-02  -.6082101E-02  -.5237671E-02  -.4390522E-02  -.3635189E-02
  -.3030443E-02  -.2737755E-02  -.2632180E-02  -.2666376E-02  -.2570644E-02
  -.2322043E-02  -.2056623E-02  -.1785443E-02  -.1378456E-02  -.8477378E-03
  -.9085035E-04   .8461028E-03   .1640977E-02   .2082281E-02   .2183481E-02
   .2105078E-02   .2017049E-02   .2105636E-02   .2517047E-02   .3054303E-02
   .3553499E-02   .4064385E-02   .4492469E-02   .4826473E-02   .5232707E-02
   .5646744E-02   .5929857E-02   .6031057E-02   .6110577E-02   .6403119E-02
   .6717098E-02   .6688273E-02   .6260164E-02   .5520313E-02   .4793343E-02
   .4230763E-02   .3618456E-02   .2836535E-02   .2109517E-02   .1652316E-02
   .1486249E-02   .1482628E-02   .1405341E-02   .9331459E-03   .1451491E-03
  -.5978861E-03  -.1524389E-02  -.2654897E-02  -.3648478E-02  -.4440315E-02
  -.5347667E-02  -.6350022E-02  -.7441450E-02  -.8548019E-02  -.9397601E-02
  -.9850793E-02  -.9993114E-02  -.9878377E-02  -.9364039E-02  -.8389852E-02
  -.7079596E-02  -.5626507E-02  -.4179736E-02  -.2896190E-02  -.1919208E-02
  -.1155224E-02  -.5213375E-03   .2277176E-04   .3209769E-03   .5459066E-03
   .7715167E-03   .9443639E-03   .1139667E-02   .1635413E-02   .2575087E-02
   .3870179E-02   .5329927E-02   .6800709E-02   .8225608E-02   .9606563E-02
   .1097150E-01   .1234767E-01   .1373220E-01   .1491797E-01   .1557296E-01
   .1578078E-01   .1558604E-01   .1523307E-01   .1497330E-01   .1478903E-01
   .1436355E-01   .1358553E-01   .1277277E-01   .1223762E-01   .1205173E-01
   .1208790E-01   .1208303E-01   .1187718E-01   .1174745E-01   .1169709E-01
   .1157423E-01   .1149437E-01   .1131454E-01   .1104611E-01   .1080886E-01
   .1056398E-01   .1014753E-01   .9567688E-02   .8752359E-02   .7767192E-02
   .6930377E-02   .6365328E-02   .5984819E-02   .5822366E-02   .5617395E-02
   .5208359E-02   .4642911E-02   .4224085E-02   .3882072E-02   .3586066E-02
   .3372084E-02   .3161323E-02   .2780206E-02   .2314863E-02   .1849583E-02
   .1317673E-02   .8376883E-03   .5418398E-03   .4417328E-03   .4614427E-03
   .5146916E-03   .6443025E-03   .8983359E-03   .1076591E-02   .1172493E-02
   .1045287E-02   .7883485E-03   .5735649E-03   .4833252E-03   .4859375E-03
   .4114466E-03   .6084212E-04  -.5297606E-03  -.1279831E-02  -.2048677E-02
  -.2901516E-02  -.3837388E-02  -.4609126E-02  -.5142153E-02  -.5626366E-02
  -.6066579E-02  -.6464976E-02  -.6951742E-02  -.7431442E-02  -.7762056E-02
  -.8012031E-02  -.8493444E-02  -.9290428E-02  -.1008812E-01  -.1059941E-01
  -.1086403E-01  -.1106735E-01  -.1117849E-01  -.1148689E-01  -.1214170E-01
  -.1286694E-01  -.1336706E-01  -.1366045E-01  -.1400180E-01  -.1448794E-01
  -.1515389E-01  -.1577797E-01  -.1605389E-01  -.1581365E-01  -.1531966E-01
  -.1489361E-01  -.1458529E-01  -.1410876E-01  -.1324813E-01  -.1211848E-01
  -.1104018E-01  -.1013253E-01  -.9422314E-02  -.8674782E-02  -.7677336E-02
  -.6403828E-02  -.4972198E-02  -.3615788E-02  -.2563077E-02  -.1677308E-02
  -.8097170E-03  -.9570099E-04   .3295878E-03   .4795895E-03   .4686527E-03
   .4111986E-03   .2733967E-03  -.9327242E-04  -.6559988E-03  -.1365957E-02
  -.1990390E-02  -.2349913E-02  -.2454104E-02  -.2522276E-02  -.2828453E-02
  -.3189775E-02  -.3307308E-02  -.3263926E-02  -.3005725E-02  -.2656142E-02
  -.2385400E-02  -.2165282E-02  -.1809671E-02  -.1391626E-02  -.9713917E-03
  -.4677722E-03   .9793768E-05   .3251087E-03   .4364434E-03   .4131602E-03
   .3555360E-03   .3269061E-03   .3399569E-03   .3736900E-03   .4091973E-03
   .4433193E-03   .4678414E-03   .4763231E-03   .4705385E-03   .4567824E-03
   .4399153E-03   .4160976E-03   .3717675E-03   .3128552E-03   .2599702E-03
   .2434435E-03   .3400502E-03   .6855988E-03   .1155630E-02   .1614507E-02
   .2187563E-02   .2974489E-02   .3842249E-02   .4692172E-02   .5427380E-02
   .6121880E-02   .6789063E-02   .7543545E-02   .8466088E-02   .9400148E-02
   .1034454E-01   .1140785E-01   .1256424E-01   .1352776E-01   .1407506E-01
   .1422710E-01   .1409144E-01   .1361484E-01   .1282847E-01   .1205369E-01
   .1151275E-01   .1107132E-01   .1066882E-01   .1037069E-01   .1013797E-01
   .9760343E-02   .9292200E-02   .8926040E-02   .8752558E-02   .8738933E-02
   .8795122E-02   .8840980E-02   .8847302E-02   .8824222E-02   .8794655E-02
   .8779342E-02   .8777419E-02   .8771492E-02   .8759047E-02   .8750809E-02
   .8754155E-02   .8768822E-02   .8789923E-02   .8811972E-02   .8827436E-02
   .8764185E-02   .8380492E-02   .7604804E-02   .6779416E-02   .6249159E-02
   .6083201E-02   .6133401E-02   .6151664E-02   .5797147E-02   .4982575E-02
   .4068066E-02   .3370611E-02   .2760335E-02   .2028541E-02   .1297257E-02
   .7117214E-03   .1602719E-03  -.3477591E-03  -.7747620E-03  -.1260494E-02
  -.1760822E-02  -.2120625E-02  -.2281284E-02  -.2289583E-02  -.2239057E-02
  -.2200135E-02  -.2200767E-02  -.2230927E-02  -.2268234E-02  -.2297472E-02
  -.2317365E-02  -.2331351E-02  -.2344329E-02  -.2362072E-02  -.2381393E-02
  -.2389924E-02  -.2405649E-02  -.2436722E-02  -.2474866E-02  -.2508126E-02
  -.2530570E-02  -.2543828E-02  -.2551241E-02  -.2555422E-02  -.2558095E-02
  -.2555373E-02  -.2540475E-02  -.2539115E-02  -.2644726E-02  -.3004298E-02
  -.3498543E-02  -.3907136E-02  -.4104646E-02  -.4110680E-02  -.3933190E-02
  -.3508539E-02  -.2920678E-02  -.2126745E-02  -.1176959E-02  -.2686967E-03
   .5616729E-03   .1267948E-02   .1920063E-02   .2543961E-02   .3211977E-02
   .3773924E-02   .4096288E-02   .4281645E-02   .4487066E-02   .4518004E-02
   .4375347E-02   .4300796E-02   .4550734E-02   .4992039E-02   .5367249E-02
   .5542503E-02   .5543852E-02   .5571424E-02   .5875171E-02   .6439149E-02
   .7182972E-02   .7833690E-02   .8193020E-02   .8267353E-02   .8186882E-02
   .7988491E-02   .7593436E-02   .7145982E-02   .6729296E-02   .6239942E-02
   .5675393E-02   .5015379E-02   .4439966E-02   .4110360E-02   .4022089E-02
   .4058812E-02   .4119862E-02   .4164216E-02   .4291130E-02   .4670728E-02
   .5166716E-02   .5566874E-02   .5878472E-02   .6289616E-02   .6744434E-02
   .7198523E-02   .7752645E-02   .8380968E-02   .9077365E-02   .9671418E-02
   .1002639E-01   .1015325E-01   .1015379E-01   .1013376E-01   .1014441E-01
   .1007777E-01   .9746343E-02   .9284235E-02   .8810849E-02   .8259934E-02
   .7661334E-02   .6997505E-02   .6418349E-02   .5855866E-02   .4990607E-02
   .4034065E-02   .3233164E-02   .2452920E-02   .1486122E-02   .3620299E-03
  -.6792834E-03  -.1568942E-02  -.2303689E-02  -.3118347E-02  -.4212788E-02
  -.5431469E-02  -.6522751E-02  -.7542823E-02  -.8523767E-02  -.9406719E-02
  -.1018958E-01  -.1074006E-01  -.1100453E-01  -.1104014E-01  -.1084731E-01
  -.1042363E-01  -.9974645E-02  -.9545517E-02  -.9054609E-02  -.8619234E-02
  -.8334687E-02  -.8069606E-02  -.7657854E-02  -.7213875E-02  -.6763725E-02
  -.6233347E-02  -.5624152E-02  -.4942314E-02  -.4384181E-02  -.4080167E-02
  -.3987765E-02  -.3865081E-02  -.3500745E-02  -.3054263E-02  -.2727282E-02
  -.2458995E-02  -.2089871E-02  -.1731660E-02  -.1521896E-02  -.1483351E-02
  -.1553467E-02  -.1665579E-02  -.1914133E-02  -.2404264E-02  -.2954279E-02
  -.3493286E-02  -.4079368E-02  -.4595942E-02  -.5071758E-02  -.5638834E-02
  -.6328352E-02  -.7253871E-02  -.8330221E-02  -.9359394E-02  -.1026164E-01
  -.1089360E-01  -.1132067E-01  -.1162809E-01  -.1167529E-01  -.1165590E-01
  -.1173606E-01  -.1186308E-01  -.1215459E-01  -.1249881E-01  -.1274638E-01
  -.1284989E-01  -.1286250E-01  -.1286321E-01  -.1288683E-01  -.1293186E-01
  -.1297939E-01  -.1299924E-01  -.1285175E-01  -.1241259E-01  -.1172140E-01
  -.1077322E-01  -.9729577E-02  -.8764469E-02  -.7938982E-02  -.7205778E-02
  -.6522032E-02  -.5881340E-02  -.5240733E-02  -.4731839E-02  -.4446965E-02
  -.4358087E-02  -.4368939E-02  -.4390957E-02  -.4382220E-02  -.4344695E-02
  -.4302942E-02  -.4279307E-02  -.4274628E-02  -.4285019E-02  -.4298495E-02
  -.4309165E-02  -.4326141E-02  -.4354467E-02  -.4353956E-02  -.4142259E-02
  -.3692023E-02  -.3246416E-02  -.2985420E-02  -.2927796E-02  -.2988726E-02
  -.3070969E-02  -.3142762E-02  -.3361106E-02  -.3798644E-02  -.4287949E-02
  -.4810258E-02  -.5381466E-02  -.6013799E-02  -.6681833E-02  -.7366028E-02
  -.8014985E-02  -.8464699E-02  -.8648920E-02  -.8645080E-02  -.8575863E-02
  -.8513306E-02  -.8478406E-02  -.8452402E-02  -.8386541E-02  -.8084786E-02
  -.7368144E-02  -.6435103E-02  -.5654859E-02  -.5057720E-02  -.4550259E-02
  -.4200603E-02  -.4199072E-02  -.4548413E-02  -.4968988E-02  -.5243255E-02
  -.5318668E-02  -.5292177E-02  -.5417049E-02  -.5652600E-02  -.5882756E-02
  -.6003642E-02  -.5885817E-02  -.5653135E-02  -.5466823E-02  -.5354152E-02
  -.4994216E-02  -.4389202E-02  -.3799110E-02  -.3283970E-02  -.2746422E-02
  -.1980518E-02  -.1070541E-02  -.1450109E-03   .8390916E-03   .1757574E-02
   .2379212E-02   .2811137E-02   .3259295E-02   .3838304E-02   .4511806E-02
   .5075893E-02   .5537516E-02   .5832319E-02   .5985578E-02   .6184187E-02
   .6435244E-02   .6819532E-02   .7333165E-02   .7767957E-02   .7976652E-02
   .7966954E-02   .7851270E-02   .7739765E-02   .7682626E-02   .7672588E-02
   .7676866E-02   .7663524E-02   .7600285E-02   .7334743E-02   .6844054E-02
   .6327261E-02   .5796325E-02   .5239674E-02   .4793532E-02   .4524370E-02
   .4399182E-02   .4353710E-02   .4353759E-02   .4530810E-02   .4920713E-02
   .5317081E-02   .5552315E-02   .5604349E-02   .5549471E-02   .5481616E-02
   .5482977E-02   .5732186E-02   .6245868E-02   .6763243E-02   .7071583E-02
   .7151931E-02   .7108718E-02   .7060586E-02   .7076480E-02   .7149087E-02
   .7238367E-02   .7332653E-02   .7583892E-02   .8062808E-02   .8729348E-02
   .9451092E-02   .1000927E-01   .1046304E-01   .1090439E-01   .1124970E-01
   .1145472E-01   .1154355E-01   .1155126E-01   .1149560E-01   .1125844E-01
   .1083205E-01   .1040830E-01   .9974222E-02   .9496078E-02   .9098493E-02
   .8852518E-02   .8582537E-02   .8165160E-02   .7739309E-02   .7453114E-02
   .7348790E-02   .7350041E-02   .7216985E-02   .6844319E-02   .6414430E-02
   .6121553E-02   .6023689E-02   .6045762E-02   .5918776E-02   .5520440E-02
   .5043275E-02   .4536423E-02   .4008706E-02   .3592470E-02   .3333320E-02
   .3070974E-02   .2856604E-02   .2872523E-02   .3016340E-02   .2974866E-02
   .2626231E-02   .2186456E-02   .1878663E-02   .1795897E-02   .2044352E-02
   .2561545E-02   .3057849E-02   .3333805E-02   .3380942E-02   .3310048E-02
   .3233638E-02   .3182637E-02   .2991404E-02   .2589045E-02   .2164703E-02
   .1864542E-02   .1557793E-02   .1142833E-02   .7601488E-03   .5107450E-03
   .2352391E-03  -.1763428E-03  -.5936359E-03  -.8831045E-03  -.1006032E-02
  -.1008536E-02  -.9427091E-03  -.7016535E-03  -.2658166E-03   .1564103E-03
   .4076734E-03   .4970256E-03   .6668594E-03   .1032361E-02   .1279165E-02
   .1327978E-02   .1226851E-02   .9361801E-03   .6044355E-03   .3824462E-03
   .3097056E-03   .3368770E-03   .3918761E-03   .4216480E-03   .4139924E-03
   .3845850E-03   .3560769E-03   .3425883E-03   .3438036E-03   .3653123E-03
   .5322540E-03   .9485996E-03   .1431051E-02   .1908423E-02   .2431996E-02
   .2870020E-02   .3117844E-02   .3187450E-02   .3146693E-02   .2947403E-02
   .2524131E-02   .2059737E-02   .1608492E-02   .1101178E-02   .6606989E-03
   .3822037E-03   .1287655E-03  -.2812853E-03  -.7277671E-03  -.1049887E-02
  -.1193327E-02  -.1194202E-02  -.1014501E-02  -.7289579E-03  -.5436185E-03
  -.4789221E-03  -.6683932E-03  -.9821774E-03  -.1220110E-02  -.1165646E-02
  -.7526537E-03  -.3842107E-03  -.4354670E-03  -.8005805E-03  -.1329355E-02
  -.1958696E-02  -.2602912E-02  -.3247712E-02  -.3750797E-02  -.4159317E-02
  -.4637539E-02  -.5226124E-02  -.5913516E-02  -.6481917E-02  -.6783962E-02
  -.6843397E-02  -.6787681E-02  -.6739220E-02  -.6755417E-02  -.6942264E-02
  -.7360372E-02  -.7801944E-02  -.8074924E-02  -.8140943E-02  -.8077633E-02
  -.7987271E-02  -.7918122E-02  -.7749289E-02  -.7351160E-02  -.6891973E-02
  -.6546448E-02  -.6116207E-02  -.5310329E-02  -.4411153E-02  -.3759600E-02
  -.3335541E-02  -.2915423E-02  -.2384300E-02  -.1702243E-02  -.9682251E-03
  -.2289968E-03   .3431440E-03   .6429687E-03   .7171770E-03   .6870709E-03
   .6577456E-03   .6720756E-03   .7194586E-03   .7618139E-03   .6747462E-03
   .3054831E-03  -.1788760E-03  -.5497797E-03  -.8132523E-03  -.1175905E-02
  -.1687235E-02  -.2355828E-02  -.2967489E-02  -.3332046E-02  -.3429892E-02
  -.3268421E-02  -.2815647E-02  -.2198336E-02  -.1496886E-02  -.9229467E-03
  -.6139153E-03  -.4409242E-03  -.1240398E-03   .3953059E-03   .1097357E-02
   .1736231E-02   .2109561E-02   .2205236E-02   .2144280E-02   .2060419E-02
   .2027297E-02   .2048190E-02   .2091094E-02   .2125195E-02   .2135321E-02
   .2123515E-02   .2103677E-02   .2087956E-02   .2080877E-02   .2083785E-02
   .2186088E-02   .2434516E-02   .2522688E-02   .2386396E-02   .2162262E-02
   .1986583E-02   .1912840E-02   .1919207E-02   .1947886E-02   .1888773E-02
   .1554556E-02   .9864288E-03   .3249752E-03  -.1054298E-03  -.3638867E-03
  -.5763245E-03  -.8179694E-03  -.1255185E-02  -.1866178E-02  -.2611115E-02
  -.3306047E-02  -.3747613E-02  -.3893058E-02  -.3864403E-02  -.3799613E-02
  -.3766745E-02  -.3784779E-02  -.3821450E-02  -.3843377E-02  -.3841459E-02
  -.3825674E-02  -.3810580E-02  -.3797759E-02  -.3717283E-02  -.3393329E-02
  -.2914550E-02  -.2447580E-02  -.2001601E-02  -.1747096E-02  -.1557266E-02
  -.1327240E-02  -.1109700E-02  -.9612313E-03  -.8951990E-03  -.8844590E-03
  -.8911294E-03  -.8921912E-03  -.8797369E-03  -.8579912E-03  -.8362970E-03
  -.8559677E-03  -.1113702E-02  -.1580061E-02  -.2060107E-02  -.2591219E-02
  -.3124887E-02  -.3500217E-02  -.3662762E-02  -.3670679E-02  -.3581184E-02
  -.3255943E-02  -.2753010E-02  -.2317629E-02  -.2056577E-02  -.1773686E-02
  -.1399665E-02  -.1070248E-02  -.9331084E-03  -.1146694E-02  -.1443952E-02
  -.1732685E-02  -.2034548E-02  -.2269564E-02  -.2409431E-02  -.2473939E-02
  -.2498601E-02  -.2517679E-02  -.2580303E-02  -.2879663E-02  -.3387299E-02
  -.3818433E-02  -.3816343E-02  -.3420425E-02  -.2934219E-02  -.2405504E-02
  -.1920811E-02  -.1633755E-02  -.1509527E-02  -.1242880E-02  -.6050185E-03
   .2347326E-03   .9361355E-03   .1465918E-02   .1931017E-02   .2420024E-02
   .2808779E-02   .3053705E-02   .3289978E-02   .3495886E-02   .3629507E-02
   .3685509E-02   .3678303E-02   .3639283E-02   .3606516E-02   .3595652E-02
   .3592251E-02   .3579941E-02   .3560863E-02   .3531826E-02   .3491646E-02
   .3394082E-02   .2920854E-02   .2011173E-02   .1058541E-02   .8583083E-04
  -.9452505E-03  -.1764632E-02  -.2212742E-02  -.2332769E-02  -.2286384E-02
  -.2232160E-02  -.2236355E-02  -.2288052E-02  -.2354705E-02  -.2410026E-02
  -.2409934E-02  -.2195242E-02  -.1733187E-02  -.1098966E-02  -.4255607E-03
   .5747402E-04   .2614119E-03   .2580947E-03   .1774980E-03   .1162651E-03
   .9549786E-04   .9373601E-04   .9259389E-04   .8239870E-04   .5348969E-04
   .7610690E-05  -.4374878E-04  -.9253208E-04  -.1010929E-03   .6465804E-04
   .4816294E-03   .9554471E-03   .1418528E-02   .1926924E-02   .2343082E-02
   .2555975E-02   .2590821E-02   .2530845E-02   .2454982E-02   .2427379E-02
   .2573311E-02   .2845940E-02   .2930483E-02   .2938953E-02   .3126276E-02
   .3417932E-02   .3646199E-02   .3739357E-02   .3726171E-02   .3673367E-02
   .3632176E-02   .3612642E-02   .3583829E-02   .3415294E-02   .3119375E-02
   .2880025E-02   .2593830E-02   .2314272E-02   .2129417E-02   .2049588E-02
   .2052999E-02   .2231540E-02   .2656467E-02   .3136102E-02   .3591926E-02
   .4088169E-02   .4508294E-02   .4751072E-02   .4817257E-02   .4795746E-02
   .4919449E-02   .5346481E-02   .5993978E-02   .6726631E-02   .7288864E-02
   .7550924E-02   .7571473E-02   .7505441E-02   .7605420E-02   .8030017E-02
   .8557115E-02   .8826594E-02   .8705962E-02   .8455564E-02   .8207665E-02
   .8138218E-02   .8054420E-02   .7895412E-02   .7728302E-02   .7616602E-02
   .7576355E-02   .7585979E-02   .7510395E-02   .7058494E-02   .6229376E-02
   .5398557E-02   .4891218E-02   .4743258E-02   .4810653E-02   .4920092E-02
   .4968602E-02   .4942038E-02   .4879651E-02   .4830121E-02   .4815733E-02
   .4829879E-02   .4846283E-02   .4749968E-02   .4392001E-02   .3928555E-02
   .3472133E-02   .2959739E-02   .2486525E-02   .2177480E-02   .2047237E-02
   .1927687E-02   .1583621E-02   .1119131E-02   .7408447E-03   .4509512E-03
   .7524165E-04  -.3132759E-03  -.4866335E-03  -.2331221E-03   .2516626E-03
   .6687616E-03   .9560064E-03   .1182346E-02   .1166112E-02   .9581459E-03
   .7452948E-03   .7439097E-03   .1119887E-02   .1667010E-02   .2083088E-02
   .2246337E-02   .2220624E-02   .2145501E-02   .2112618E-02   .2131649E-02
   .2096603E-02   .1717637E-02   .9039031E-03   .6564771E-05  -.5958732E-03
  -.7950413E-03  -.8584008E-03  -.1342043E-02  -.2195804E-02  -.2984262E-02
  -.3422943E-02  -.3505915E-02  -.3396110E-02  -.3270291E-02  -.3221343E-02
  -.3253351E-02  -.3332872E-02  -.3406851E-02  -.3439176E-02  -.3431496E-02
  -.3406463E-02  -.3383033E-02  -.3369156E-02  -.3356785E-02  -.3273278E-02
  -.2937789E-02  -.2381382E-02  -.1734274E-02  -.1385371E-02  -.1437793E-02
  -.1609863E-02  -.1583080E-02  -.1530293E-02  -.1669357E-02  -.2127675E-02
  -.2727391E-02  -.3189427E-02  -.3395716E-02  -.3398705E-02  -.3321833E-02
  -.3269385E-02  -.3340351E-02  -.3627474E-02  -.3900015E-02  -.4171584E-02
  -.4467017E-02  -.4700648E-02  -.4820975E-02  -.4848171E-02  -.4865134E-02
  -.5093831E-02  -.5522839E-02  -.5927992E-02  -.6156895E-02  -.6204178E-02
  -.6153857E-02  -.6096027E-02  -.6081309E-02  -.6145933E-02  -.6462876E-02
  -.7024145E-02  -.7766924E-02  -.8491877E-02  -.8947436E-02  -.9083781E-02
  -.9025633E-02  -.8928072E-02  -.8883948E-02  -.8903584E-02  -.8948771E-02
  -.8981314E-02  -.8988063E-02  -.9013893E-02  -.9302211E-02  -.1003090E-01
  -.1094232E-01  -.1163759E-01  -.1194552E-01  -.1194365E-01  -.1180996E-01
  -.1178435E-01  -.1230634E-01  -.1328102E-01  -.1417899E-01  -.1466604E-01
  -.1474140E-01  -.1460098E-01  -.1445173E-01  -.1440202E-01  -.1446239E-01
  -.1457069E-01  -.1465211E-01  -.1467207E-01  -.1462874E-01  -.1454744E-01
  -.1441010E-01  -.1389890E-01  -.1299196E-01  -.1207027E-01  -.1112785E-01
  -.1011619E-01  -.9307363E-02  -.8822724E-02  -.8288118E-02  -.7447867E-02
  -.6393696E-02  -.5197131E-02  -.4104246E-02  -.3402939E-02  -.3087964E-02
  -.2663671E-02  -.1851906E-02  -.9789678E-03  -.3904551E-03  -.1760239E-03
  -.1697047E-03   .1346013E-03   .9335104E-03   .1821468E-02   .2408401E-02
   .2584748E-02   .2492297E-02   .2392119E-02   .2730279E-02   .3610557E-02
   .4564037E-02   .5162441E-02   .5320804E-02   .5203685E-02   .5031567E-02
   .4922274E-02   .4692605E-02   .4080299E-02   .3220657E-02   .2494513E-02
   .2117102E-02   .2056344E-02   .2147482E-02   .2227150E-02   .2231306E-02
   .2209166E-02   .2461316E-02   .3237914E-02   .4160092E-02   .4807832E-02
   .5048949E-02   .4999249E-02   .4847959E-02   .4730912E-02   .4700631E-02
   .4735507E-02   .4775510E-02   .4798550E-02   .5027905E-02   .5530990E-02
   .6028266E-02   .6326910E-02   .6397148E-02   .6326108E-02   .6233682E-02
   .6184383E-02   .6135277E-02   .5862664E-02   .5347196E-02   .4621332E-02
   .3873206E-02   .3326800E-02   .2860997E-02   .2369019E-02   .1735728E-02
   .1042516E-02   .4853921E-03  -.3237203E-04  -.5739295E-03  -.1215399E-02
  -.1904686E-02  -.2662886E-02  -.3592135E-02  -.4520119E-02  -.5203234E-02
  -.5729699E-02  -.6208588E-02  -.6592525E-02  -.6859719E-02  -.7155056E-02
  -.7400911E-02  -.7397752E-02  -.7220821E-02  -.7007020E-02  -.6690855E-02
  -.6241505E-02  -.5807150E-02  -.5354520E-02  -.4848882E-02  -.4429596E-02
  -.4167432E-02  -.3882788E-02  -.3460682E-02  -.3042781E-02  -.2742850E-02
  -.2413559E-02  -.1954925E-02  -.1520425E-02  -.1245137E-02  -.1113363E-02
  -.8986642E-03  -.4883700E-03  -.5549780E-04   .2576548E-03   .5598949E-03
   .8055563E-03   .9803484E-03   .1216240E-02   .1464429E-02   .1665954E-02
   .1956092E-02   .2398491E-02   .2821981E-02   .3106967E-02   .3399194E-02
   .3807859E-02   .4200170E-02   .4449306E-02   .4536264E-02   .4545452E-02
   .4716331E-02   .5133259E-02   .5585429E-02   .5881739E-02   .6003865E-02
   .6193531E-02   .6578865E-02   .6985659E-02   .7251955E-02   .7366814E-02
   .7539552E-02   .7747799E-02   .7948157E-02   .8236024E-02   .8520146E-02
   .8699214E-02   .8755234E-02   .8730702E-02   .8684900E-02   .8654157E-02
   .8646491E-02   .8652833E-02   .8659652E-02   .8658102E-02   .8648393E-02
   .8635902E-02   .8626605E-02   .8607119E-02   .8431982E-02   .7970712E-02
   .7302562E-02   .6543719E-02   .5952131E-02   .5647104E-02   .5441202E-02
   .5067942E-02   .4468067E-02   .3709376E-02   .3071657E-02   .2720319E-02
   .2497360E-02   .2146273E-02   .1599249E-02   .8940036E-03   .2866275E-03
  -.6112824E-04  -.2939581E-03  -.6407052E-03  -.1030644E-02  -.1321817E-02
  -.1457235E-02  -.1469365E-02  -.1427161E-02  -.1387179E-02  -.1374491E-02
  -.1385859E-02  -.1402016E-02  -.1407988E-02  -.1398922E-02  -.1366874E-02
  -.1187373E-02  -.7617998E-03  -.2867573E-03   .3575289E-04   .1520526E-03
   .1304235E-03   .7175412E-04   .4331849E-04   .5914203E-04   .9867910E-04
   .1259193E-03   .1269116E-03   .1142762E-03   .8849885E-04   .6653254E-04
   .5848005E-04   .6314330E-04   .8303506E-04   .1110977E-03   .1239806E-03
   .1174311E-03   .1030985E-03   .9401152E-04   .1044564E-03   .1459286E-03
   .3374081E-03   .9115475E-03   .1783843E-02   .2572584E-02   .3044762E-02
   .3340990E-02   .3846005E-02   .4630683E-02   .5381258E-02   .5830726E-02
   .5948671E-02   .5884692E-02   .5795247E-02   .5762801E-02   .5790678E-02
   .5839729E-02   .5860077E-02   .5741598E-02   .5462604E-02   .5343110E-02
   .5350432E-02   .5190283E-02   .4870564E-02   .4466638E-02   .4036573E-02
   .3879427E-02   .3898967E-02   .3849023E-02   .3781253E-02   .3565231E-02
   .3255178E-02   .2999249E-02   .2875118E-02   .2864158E-02   .2902606E-02
   .2934810E-02   .2936620E-02   .2914771E-02   .2880905E-02   .2741062E-02
   .2344257E-02   .1856277E-02   .1487045E-02   .1312509E-02   .1189594E-02
   .8701107E-03   .4305921E-03   .6127464E-04  -.2377568E-03  -.6422295E-03
  -.1173543E-02  -.1744106E-02  -.2096934E-02  -.2367833E-02  -.2623690E-02
  -.2825082E-02  -.2941945E-02  -.2975946E-02  -.2956939E-02  -.2938031E-02
  -.2939489E-02  -.2955286E-02  -.2972128E-02  -.2986442E-02  -.3009348E-02
  -.3037321E-02  -.3060312E-02  -.3073229E-02  -.3078575E-02  -.3080641E-02
  -.3081929E-02  -.3083410E-02  -.3087396E-02  -.3092341E-02  -.3108551E-02
  -.3239621E-02  -.3525242E-02  -.3644360E-02  -.3524366E-02  -.3315100E-02
  -.3168926E-02  -.3132773E-02  -.3169107E-02  -.3217525E-02  -.3238876E-02
  -.3228316E-02  -.3209571E-02  -.3216825E-02  -.3342504E-02  -.3619614E-02
  -.3730761E-02  -.3605964E-02  -.3385597E-02  -.3212481E-02  -.3143340E-02
  -.3156777E-02  -.3199490E-02  -.3229979E-02  -.3236752E-02  -.3247318E-02
  -.3354998E-02  -.3641138E-02  -.3813183E-02  -.3804696E-02  -.3859434E-02
  -.3910753E-02  -.3994429E-02  -.3963983E-02  -.3771408E-02  -.3529026E-02
  -.3355188E-02  -.3304556E-02  -.3343105E-02  -.3398659E-02  -.3416553E-02
  -.3399634E-02  -.3356596E-02  -.3238680E-02  -.2895767E-02  -.2491021E-02
  -.2351560E-02  -.2320062E-02  -.2222704E-02  -.2068355E-02  -.1931440E-02
  -.1845410E-02  -.1804325E-02  -.1727731E-02  -.1486396E-02  -.1266309E-02
  -.1094135E-02  -.1058584E-02  -.9811282E-03  -.7674015E-03  -.5279983E-03
  -.3516143E-03  -.2521026E-03  -.2086533E-03  -.1249330E-03   .1909294E-03
   .6538227E-03   .1116510E-02   .1573406E-02   .1833795E-02   .1948679E-02
   .1848980E-02   .1582795E-02   .1325712E-02   .1121143E-02   .7941435E-03
   .3745541E-03   .3290019E-04  -.1384157E-03  -.1678105E-03  -.2030016E-03
  -.4882590E-03  -.9675261E-03  -.1389723E-02  -.1616924E-02  -.1661637E-02
  -.1669328E-02  -.1845711E-02  -.1968748E-02  -.1911318E-02  -.1763783E-02
  -.1635799E-02  -.1577810E-02  -.1582634E-02  -.1614289E-02  -.1636975E-02
  -.1569150E-02  -.1244205E-02  -.8326523E-03  -.6814468E-03  -.6494689E-03
  -.5778335E-03  -.4641043E-03  -.3647931E-03  -.3131901E-03  -.3039786E-03
  -.3118950E-03  -.2482738E-03   .6809911E-04   .5474400E-03   .1021142E-02
   .1536355E-02   .2022325E-02   .2344403E-02   .2473888E-02   .2473426E-02
   .2435179E-02   .2487110E-02   .2816905E-02   .3318246E-02   .3753494E-02
   .4051676E-02   .4322801E-02   .4389677E-02   .4220706E-02   .3905267E-02
   .3410928E-02   .2880219E-02   .2512065E-02   .2366219E-02   .2376662E-02
   .2432316E-02   .2387338E-02   .2050163E-02   .1535651E-02   .1105876E-02
   .8941172E-03   .8058743E-03   .5658642E-03   .2406230E-03   .1899670E-03
   .4423150E-03   .7566069E-03   .9507608E-03   .9930587E-03   .1008061E-02
   .1182207E-02   .1302599E-02   .1299309E-02   .1422649E-02   .1701469E-02
   .1914525E-02   .1837833E-02   .1652445E-02   .1382972E-02   .1141416E-02
   .1159245E-02   .1280042E-02   .1418999E-02   .1356605E-02   .1084438E-02
   .7833069E-03   .6660818E-03   .9527543E-03   .1493358E-02   .1967308E-02
   .2200543E-02   .2208393E-02   .2098352E-02   .1988802E-02   .1948505E-02
   .1973565E-02   .2019342E-02   .2035425E-02   .2010993E-02   .1920080E-02
   .1601208E-02   .1117160E-02   .6430081E-03   .1339631E-03  -.3765675E-03
  -.7500713E-03  -.9275360E-03  -.9422908E-03  -.8874311E-03  -.8589468E-03
  -.8869501E-03  -.9459711E-03  -.1035450E-02  -.1329548E-02  -.1792966E-02
  -.2149713E-02  -.2083162E-02  -.1651070E-02  -.1178409E-02  -.8825501E-03
  -.8013148E-03  -.8699600E-03  -.9813916E-03  -.1052612E-02  -.1062407E-02
  -.1035651E-02  -.1008516E-02  -.1002228E-02  -.1016980E-02  -.1043145E-02
  -.1104986E-02  -.1388492E-02  -.1861048E-02  -.2318678E-02  -.2761048E-02
  -.3021326E-02  -.3192398E-02  -.3417385E-02  -.3640698E-02  -.3791883E-02
  -.3852422E-02  -.3851277E-02  -.3844358E-02  -.3861896E-02  -.3906891E-02
  -.3948501E-02  -.3977465E-02  -.3997988E-02  -.4008296E-02  -.4011233E-02
  -.4007366E-02  -.3964329E-02  -.3693410E-02  -.3238950E-02  -.2827726E-02
  -.2609339E-02  -.2581633E-02  -.2611993E-02  -.2444942E-02  -.2224654E-02
  -.1974283E-02  -.1704312E-02  -.1698078E-02  -.1830848E-02  -.2020841E-02
  -.2066277E-02  -.1860703E-02  -.1566314E-02  -.1350830E-02  -.1273989E-02
  -.1298625E-02  -.1354542E-02  -.1389483E-02  -.1386992E-02  -.1362385E-02
  -.1340511E-02  -.1348835E-02  -.1385216E-02  -.1425354E-02  -.1450786E-02
  -.1458539E-02  -.1454285E-02  -.1449594E-02  -.1484092E-02  -.1715244E-02
  -.1915456E-02  -.1873910E-02  -.1677572E-02  -.1451062E-02  -.1113035E-02
  -.6567577E-03  -.2285030E-03   .2271176E-03   .7287206E-03   .1134640E-02
   .1380338E-02   .1650911E-02   .2064984E-02   .2477551E-02   .2745159E-02
   .2839154E-02   .2794800E-02   .2555131E-02   .2276660E-02   .2076484E-02
   .1851213E-02   .1627281E-02   .1469210E-02   .1410183E-02   .1430872E-02
   .1477171E-02   .1507879E-02   .1503043E-02   .1478606E-02   .1465166E-02
   .1442292E-02   .1228262E-02   .7722476E-03   .3027628E-03  -.1402845E-04
  -.2854023E-03  -.4671200E-03  -.4054977E-03  -.2024100E-03  -.1841895E-04
   .6458448E-04   .7800056E-04   .2132143E-03   .4095091E-03   .6009856E-03
   .8665457E-03   .1123545E-02   .1280984E-02   .1315028E-02   .1274192E-02
   .1221496E-02   .1194283E-02   .1195377E-02   .1208532E-02   .1219432E-02
   .1221694E-02   .1219209E-02   .1217630E-02   .1218912E-02   .1222619E-02
   .1228507E-02   .1234298E-02   .1239766E-02   .1242429E-02   .1232531E-02
   .1203336E-02   .1170436E-02   .1150264E-02   .1145332E-02   .1147501E-02
   .1140660E-02   .1112353E-02   .1076263E-02   .1049905E-02   .1038775E-02
   .1037730E-02   .1040280E-02   .1041131E-02   .1037918E-02   .1031796E-02
   .1017175E-02   .9965512E-03   .9829414E-03   .9765289E-03   .9734945E-03
   .8333480E-03   .4380287E-03  -.2138833E-04  -.3391365E-03  -.4627837E-03
  -.4525028E-03  -.3868977E-03  -.3342465E-03  -.3086877E-03  -.1680361E-03
   .2178786E-03   .6617210E-03   .9772101E-03   .1254773E-02   .1657901E-02
   .2086772E-02   .2516394E-02   .2895540E-02   .3103273E-02   .3316408E-02
   .3542816E-02   .3716482E-02   .3804707E-02   .3821156E-02   .3802751E-02
   .3781319E-02   .3771478E-02   .3773044E-02   .3777384E-02   .3775270E-02
   .3764171E-02   .3735170E-02   .3562107E-02   .3134188E-02   .2650808E-02
   .2337021E-02   .2246092E-02   .2284438E-02   .2221458E-02   .2000111E-02
   .1779307E-02   .1484978E-02   .1196494E-02   .1014334E-02   .9693967E-03
   .1135774E-02   .1443740E-02   .1545953E-02   .1502444E-02   .1625603E-02
   .1819273E-02   .1862571E-02   .1942037E-02   .2109922E-02   .2285576E-02
   .2400673E-02   .2441783E-02   .2435465E-02   .2416733E-02   .2407875E-02
   .2412669E-02   .2417585E-02   .2312940E-02   .1936739E-02   .1437038E-02
   .1058553E-02   .9088368E-03   .9290455E-03   .1012796E-02   .1068933E-02
   .1082688E-02   .1064947E-02   .9383078E-03   .5637650E-03   .9084731E-04
  -.3631622E-03  -.8680817E-03  -.1315359E-02  -.1489573E-02  -.1321708E-02
  -.1089188E-02  -.7935460E-03  -.5034333E-03  -.3148974E-03  -.2466219E-03
  -.2541981E-03  -.2799291E-03  -.2894373E-03  -.2776192E-03  -.2565414E-03
  -.2399598E-03  -.2270298E-03  -.1147709E-03   .2533992E-03   .7263726E-03
   .1083496E-02   .1236470E-02   .1229653E-02   .1163834E-02   .1119838E-02
   .1124415E-02   .1159697E-02   .1196281E-02   .1213100E-02   .1201805E-02
   .1073640E-02   .6914906E-03   .2155774E-03  -.1330941E-03  -.2739877E-03
  -.2733554E-03  -.3438293E-03  -.7008977E-03  -.1197779E-02  -.1589098E-02
  -.1764477E-02  -.1761342E-02  -.1685636E-02  -.1626869E-02  -.1619687E-02
  -.1652077E-02  -.1699244E-02  -.1831231E-02  -.2093733E-02  -.2194393E-02
  -.2172719E-02  -.2228186E-02  -.2292200E-02  -.2502263E-02  -.2814557E-02
  -.3065887E-02  -.3177683E-02  -.3179196E-02  -.3233562E-02  -.3450885E-02
  -.3555891E-02  -.3481370E-02  -.3324298E-02  -.3088179E-02  -.2665753E-02
  -.2201129E-02  -.1880879E-02  -.1759689E-02  -.1770694E-02  -.1716379E-02
  -.1378890E-02  -.9043739E-03  -.5376560E-03  -.3753210E-03  -.3748724E-03
  -.3316357E-03  -.2495687E-04   .3271044E-03   .3281044E-03   .1926960E-04
  -.3482266E-03  -.5971484E-03  -.6792121E-03  -.6543657E-03  -.7232995E-03
  -.1085120E-02  -.1567570E-02  -.1934969E-02  -.2090879E-02  -.2080154E-02
  -.2016149E-02  -.1993204E-02  -.2025215E-02  -.2083243E-02  -.2133901E-02
  -.2171779E-02  -.2318714E-02  -.2569360E-02  -.2632134E-02  -.2493342E-02
  -.2308139E-02  -.2191196E-02  -.2168158E-02  -.2202984E-02  -.2240359E-02
  -.2126439E-02  -.1737958E-02  -.1270580E-02  -.9268991E-03  -.6431536E-03
  -.2551002E-03   .1431273E-03   .4212463E-03   .5408237E-03   .5475017E-03
   .5150628E-03   .4966655E-03   .5082770E-03   .5372535E-03   .5645926E-03
   .5794319E-03   .5827043E-03   .5828810E-03   .5860592E-03   .5956231E-03
   .6174755E-03   .6347605E-03   .4994247E-03   .1104746E-03  -.3387820E-03
  -.6449982E-03  -.7494546E-03  -.7168189E-03  -.6616538E-03  -.7842104E-03
  -.1204880E-02  -.1706542E-02  -.2054701E-02  -.2177029E-02  -.2142032E-02
  -.2062224E-02  -.2015965E-02  -.2022566E-02  -.2060707E-02  -.2097556E-02
  -.2100810E-02  -.1937392E-02  -.1512008E-02  -.1033822E-02  -.7139520E-03
  -.5953468E-03  -.4869460E-03  -.2960224E-03  -.1274944E-03   .1228151E-03
   .3816978E-03   .5628029E-03   .6508068E-03   .6606958E-03   .6313709E-03
   .6068490E-03   .5933306E-03   .5898435E-03   .5927514E-03   .5971660E-03
   .5863361E-03   .4266618E-03   .1586112E-04  -.4470404E-03  -.7577010E-03
  -.8780826E-03  -.8836477E-03  -.8426014E-03  -.8102375E-03  -.8087243E-03
  -.8397321E-03  -.9055155E-03  -.1100965E-02  -.1516064E-02  -.1977614E-02
  -.2292351E-02  -.2405138E-02  -.2365632E-02  -.2140264E-02  -.1689637E-02
  -.1227030E-02  -.9399126E-03  -.8578386E-03  -.9068646E-03  -.9701509E-03
  -.8370698E-03  -.3972647E-03   .1158036E-03   .4625257E-03   .5746387E-03
   .5267975E-03   .4362731E-03   .3834861E-03   .4005051E-03   .5953113E-03
   .1039746E-02   .1517434E-02   .1823672E-02   .1914247E-02   .1867371E-02
   .1790682E-02   .1752434E-02   .1763730E-02   .1799694E-02   .1830384E-02
   .1840823E-02   .1833745E-02   .1820494E-02   .1811168E-02   .1809494E-02
   .1812800E-02   .1802526E-02   .1645400E-02   .1346269E-02   .1093292E-02
   .8056571E-03   .5377616E-03   .3795425E-03   .4605652E-03   .7054672E-03
   .7549377E-03   .5852928E-03   .3538954E-03   .2100094E-03   .3274024E-03
   .7760933E-03   .1289159E-02   .1611556E-02   .1691482E-02   .1622192E-02
   .1526238E-02   .1469961E-02   .1455356E-02   .1464169E-02   .1461311E-02
   .1292509E-02   .8434090E-03   .3307152E-03  -.1998250E-04  -.1448860E-03
  -.1136598E-03  -.3963211E-04  -.9267294E-05  -.4596985E-04  -.1041174E-03
  -.1527423E-03  -.3173837E-03  -.7139972E-03  -.1186970E-02  -.1657237E-02
  -.2046941E-02  -.2242508E-02  -.2439947E-02  -.2659755E-02  -.2839793E-02
  -.2941135E-02  -.2970005E-02  -.2959380E-02  -.2944795E-02  -.2951990E-02
  -.2978630E-02  -.2995828E-02  -.2993044E-02  -.2857564E-02  -.2475473E-02
  -.2008552E-02  -.1518724E-02  -.9814009E-03  -.5531520E-03  -.3324930E-03
  -.2888250E-03  -.3157104E-03  -.1981412E-03   .2064418E-03   .6941614E-03
   .1037201E-02   .1161691E-02   .1129915E-02   .1064259E-02   .1174209E-02
   .1586271E-02   .2082856E-02   .2419746E-02   .2510418E-02   .2313194E-02
   .1944631E-02   .1649339E-02   .1348426E-02   .1083700E-02   .9035288E-03
   .6690387E-03   .2273056E-03  -.2550996E-03  -.5859110E-03  -.7085740E-03
  -.6865727E-03  -.6300481E-03  -.6174675E-03  -.6514526E-03  -.6978812E-03
  -.7279352E-03  -.7347488E-03  -.7274269E-03  -.7274386E-03  -.7503139E-03
  -.7838069E-03  -.8103583E-03  -.8175274E-03  -.6754904E-03  -.2880902E-03
   .1445397E-04   .4655951E-04   .5623889E-04   .1352078E-03   .2501584E-03
   .3597500E-03   .5595992E-03   .9504809E-03   .1370062E-02   .1648178E-02
   .1741501E-02   .1702817E-02   .1622110E-02   .1571074E-02   .1556489E-02
   .1562192E-02   .1560466E-02   .1533305E-02   .1494037E-02   .1462253E-02
   .1448015E-02   .1448820E-02   .1456514E-02   .1454089E-02   .1428699E-02
   .1380525E-02   .1186675E-02   .7480361E-03   .2709973E-03  -.4388757E-04
  -.1366085E-03  -.1078766E-03  -.2117711E-03  -.6125603E-03  -.1110116E-02
  -.1468236E-02  -.1603781E-02  -.1576871E-02  -.1499788E-02  -.1452420E-02
  -.1456104E-02  -.1488738E-02  -.1519292E-02  -.1530994E-02  -.1523129E-02
  -.1505502E-02  -.1476310E-02  -.1309003E-02  -.8954161E-03  -.4207293E-03
  -.8995952E-04   .2275202E-04  -.7523784E-05  -.8384282E-04  -.2710076E-03
  -.5273131E-03  -.5623495E-03  -.4057517E-03  -.3526752E-03  -.6174537E-03
  -.9115424E-03  -.1014954E-02  -.1118451E-02  -.1259210E-02  -.1362902E-02
  -.1251833E-02  -.8414725E-03  -.3738945E-03  -.6802680E-04   .3987565E-04
   .1581861E-03   .4984190E-03   .9396095E-03   .1302317E-02   .1626832E-02
   .2061032E-02   .2482815E-02   .2758215E-02   .3009931E-02   .3424042E-02
   .3873270E-02   .4186484E-02   .4302121E-02   .4280135E-02   .4354492E-02
   .4708265E-02   .5166727E-02   .5508813E-02   .5648692E-02   .5633510E-02
   .5563379E-02   .5514029E-02   .5500254E-02   .5485479E-02   .5323103E-02
   .4904081E-02   .4427512E-02   .4102229E-02   .3973367E-02   .3842810E-02
   .3501838E-02   .3076360E-02   .2740630E-02   .2437935E-02   .2023249E-02
   .1601624E-02   .1300891E-02   .1170332E-02   .1180413E-02   .1246798E-02
   .1283862E-02   .1153467E-02   .7360894E-03   .2326462E-03  -.1262935E-03
  -.2488867E-03  -.2059661E-03  -.2138704E-03  -.4114403E-03  -.5198340E-03
  -.5471388E-03  -.7460332E-03  -.1075553E-02  -.1365562E-02  -.1517806E-02
  -.1540912E-02  -.1499875E-02  -.1457975E-02  -.1444760E-02  -.1456983E-02
  -.1477198E-02  -.1497121E-02  -.1613528E-02  -.1981953E-02  -.2450799E-02
  -.2800328E-02  -.2951837E-02  -.2957061E-02  -.2892738E-02  -.2832082E-02
  -.2809798E-02  -.2822363E-02  -.2845390E-02  -.2857511E-02  -.2853081E-02
  -.2837961E-02  -.2822837E-02  -.2814986E-02  -.2814394E-02  -.2817135E-02
  -.2812440E-02  -.2697469E-02  -.2321053E-02  -.1839934E-02  -.1479854E-02
  -.1329406E-02  -.1339560E-02  -.1408582E-02  -.1456363E-02  -.1457273E-02
  -.1428072E-02  -.1397989E-02  -.1384633E-02  -.1388848E-02  -.1397997E-02
  -.1335122E-02  -.1021276E-02  -.5492677E-03  -.1562329E-03   .2871354E-04
   .1749553E-04  -.8534412E-04  -.1698034E-03  -.1209907E-03   .2235242E-03
   .7336836E-03   .1143865E-02   .1257776E-02   .9368198E-03   .3858295E-03
  -.6737191E-04  -.2659413E-03  -.2500660E-03  -.1497737E-03  -.7456576E-04
  -.6262243E-04  -.9403070E-04  -.1357976E-03  -.2262135E-03  -.4687223E-03
  -.6769145E-03  -.9002371E-03  -.1164608E-02  -.1382885E-02  -.1502046E-02
  -.1532869E-02  -.1519351E-02  -.1501596E-02  -.1498409E-02  -.1509274E-02
  -.1525037E-02  -.1536938E-02  -.1541948E-02  -.1541505E-02  -.1538751E-02
  -.1536333E-02  -.1535983E-02  -.1536678E-02  -.1537900E-02  -.1541222E-02
  -.1584823E-02  -.1876387E-02  -.2380043E-02  -.2836899E-02  -.3084118E-02
  -.3126227E-02  -.3062381E-02  -.2994549E-02  -.2973939E-02  -.2998152E-02
  -.3035560E-02  -.3059584E-02  -.3062124E-02  -.3050749E-02  -.3040371E-02
  -.3052881E-02  -.3087312E-02  -.3122006E-02  -.3140767E-02  -.3141867E-02
  -.3133039E-02  -.3124179E-02  -.3120096E-02  -.3120230E-02  -.3122027E-02
  -.3124871E-02  -.3141373E-02  -.3167559E-02  -.3152078E-02  -.2892988E-02
  -.2424754E-02  -.1994945E-02  -.1760948E-02  -.1718927E-02  -.1739950E-02
  -.1536540E-02  -.1106888E-02  -.6941029E-03  -.4592322E-03  -.4131766E-03
  -.4722219E-03  -.5408550E-03  -.5435158E-03  -.3148549E-03   .1559918E-03
   .6243838E-03   .9000481E-03   .9522406E-03   .9031596E-03   .1030450E-02
   .1437111E-02   .1912429E-02   .2229593E-02   .2326989E-02   .2276316E-02
   .2202932E-02   .2335460E-02   .2566831E-02   .2613312E-02   .2480384E-02
   .2301460E-02   .2189980E-02   .2161169E-02   .2185156E-02   .2219122E-02
   .2238565E-02   .2246548E-02   .2222525E-02   .2028637E-02   .1758915E-02
   .1519416E-02   .1248504E-02   .9977817E-03   .8366125E-03   .7720988E-03
   .7574076E-03   .7330010E-03   .5343070E-03   .9465478E-04  -.3721143E-03
  -.6715893E-03  -.7620228E-03  -.7054193E-03  -.4728150E-03  -.2404827E-04
   .4334131E-03   .7325546E-03   .9774809E-03   .1352334E-02   .1757099E-02
   .2059048E-02   .2335174E-02   .2731281E-02   .3137808E-02   .3404467E-02
   .3511787E-02   .3650330E-02   .4007605E-02   .4440855E-02   .4758783E-02
   .4889402E-02   .4877332E-02   .4811680E-02   .4752771E-02   .4707876E-02
   .4668846E-02   .4640458E-02   .4627364E-02   .4626415E-02   .4629811E-02
   .4632146E-02   .4631394E-02   .4618722E-02   .4588496E-02   .4555753E-02
   .4534856E-02   .4528710E-02   .4531290E-02   .4515293E-02   .4352095E-02
   .3934692E-02   .3447451E-02   .3101936E-02   .2866163E-02   .2523986E-02
   .2124150E-02   .1814692E-02   .1663712E-02   .1642684E-02   .1673325E-02
   .1593627E-02   .1317569E-02   .1085263E-02   .9354374E-03   .1035040E-02
   .1305133E-02   .1570674E-02   .1711617E-02   .1709066E-02   .1632085E-02
   .1567929E-02   .1657634E-02   .2055157E-02   .2587880E-02   .2991752E-02
   .3151640E-02   .3135381E-02   .3062993E-02   .3011487E-02   .3000303E-02
   .3025068E-02   .3046297E-02   .3037657E-02   .2999903E-02   .2964261E-02
   .2860473E-02   .2526590E-02   .2069050E-02   .1705407E-02   .1537518E-02
   .1527749E-02   .1513130E-02   .1241562E-02   .7761477E-03   .3601427E-03
   .1417264E-03   .1123679E-03   .1731636E-03   .1655933E-03  -.6299418E-04
  -.3106358E-03  -.5841485E-03  -.8766790E-03  -.1089420E-02  -.1115194E-02
  -.8737739E-03  -.6214168E-03  -.3759013E-03  -.1202876E-03   .6168601E-04
   .7386238E-04  -.1545306E-03  -.3941521E-03  -.6547473E-03  -.9380668E-03
  -.1153336E-02  -.1257428E-02  -.1274270E-02  -.1259918E-02  -.1322561E-02
  -.1652434E-02  -.2165410E-02  -.2665493E-02  -.3172783E-02  -.3655781E-02
  -.3997696E-02  -.4157043E-02  -.4181765E-02  -.4152966E-02  -.4129962E-02
  -.4133819E-02  -.4155723E-02  -.4178562E-02  -.4189620E-02  -.4186867E-02
  -.4175967E-02  -.4165935E-02  -.4161147E-02  -.4164391E-02  -.4182227E-02
  -.4193866E-02  -.4147719E-02  -.3858627E-02  -.3371721E-02  -.2934666E-02
  -.2665902E-02  -.2408820E-02  -.2240262E-02  -.2067083E-02  -.1795465E-02
  -.1539785E-02  -.1394291E-02  -.1348005E-02  -.1323589E-02  -.1128385E-02
  -.6995572E-03  -.2394528E-03   .7471125E-04   .3584350E-03   .7335011E-03
   .1091943E-02   .1325139E-02   .1414912E-02   .1412760E-02   .1410493E-02
   .1612248E-02   .2064531E-02   .2559909E-02   .3068214E-02   .3593114E-02
   .3994881E-02   .4198141E-02   .4240241E-02   .4210891E-02   .4181087E-02
   .4168880E-02   .4173510E-02   .4184210E-02   .4189392E-02   .4186009E-02
   .4167648E-02   .4154725E-02   .4157562E-02   .4158006E-02   .4150430E-02
   .4139305E-02   .4129772E-02   .4125586E-02   .4126484E-02   .4128770E-02
   .4121406E-02   .4105378E-02   .4102316E-02   .4114383E-02   .4132162E-02
   .4137934E-02   .4117251E-02   .4060867E-02   .3847104E-02   .3393186E-02
   .2910140E-02   .2584994E-02   .2327752E-02   .1955263E-02   .1560353E-02
   .1281154E-02   .1155334E-02   .1039005E-02   .7074305E-03   .2555777E-03
  -.2122548E-03  -.7504097E-03  -.1233772E-02  -.1535307E-02  -.1746603E-02
  -.2105750E-02  -.2649433E-02  -.3367642E-02  -.4036319E-02  -.4448533E-02
  -.4572725E-02  -.4514749E-02  -.4429321E-02  -.4394785E-02  -.4410485E-02
  -.4457403E-02  -.4501502E-02  -.4519730E-02  -.4511928E-02  -.4493335E-02
  -.4478534E-02  -.4473461E-02  -.4476176E-02  -.4476499E-02  -.4400234E-02
  -.4068847E-02  -.3510082E-02  -.2787456E-02  -.2121555E-02  -.1732867E-02
  -.1637536E-02  -.1700574E-02  -.1760269E-02  -.1677843E-02  -.1300955E-02
  -.7841075E-03  -.3840029E-03  -.1407659E-03   .1660674E-03   .5560679E-03
   .8880191E-03   .1074173E-02   .1124214E-02   .1102225E-02   .1071700E-02
   .1064695E-02   .1080188E-02   .1102603E-02   .1117526E-02   .1120594E-02
   .1115423E-02   .1106273E-02   .1084114E-02   .1054470E-02   .1043838E-02
   .1045418E-02   .1043887E-02   .1039992E-02   .1037033E-02   .1033570E-02
   .1017639E-02   .1002431E-02   .9878553E-03   .9701198E-03   .9601249E-03
   .9918595E-03   .1250140E-02   .1720993E-02   .2160293E-02   .2403773E-02
   .2436734E-02   .2349886E-02   .2281928E-02   .2458445E-02   .2914867E-02
   .3373318E-02   .3460410E-02   .3100692E-02   .2598907E-02   .2241912E-02
   .2124161E-02   .2176195E-02   .2247648E-02   .2086454E-02   .1637032E-02
   .1147447E-02   .8312937E-03   .7353308E-03   .7810460E-03   .8571408E-03
   .8942647E-03   .8815661E-03   .8443818E-03   .8108064E-03   .7953007E-03
   .7979498E-03   .8097008E-03   .8195438E-03   .8089476E-03   .6577790E-03
   .3807541E-03   .1463458E-03  -.1478131E-03  -.4393228E-03  -.6329133E-03
  -.6987639E-03  -.6937694E-03  -.8194678E-03  -.1216856E-02  -.1703281E-02
  -.2045123E-02  -.2154951E-02  -.2102492E-02  -.2006614E-02  -.1948541E-02
  -.1945102E-02  -.1973367E-02  -.2001912E-02  -.2013055E-02  -.2005885E-02
  -.1990805E-02  -.1978482E-02  -.1973767E-02  -.1975274E-02  -.1980888E-02
  -.1988361E-02  -.1993866E-02  -.1995270E-02  -.1993489E-02  -.1990798E-02
  -.1988550E-02  -.1987225E-02  -.1986514E-02  -.1985773E-02  -.1984941E-02
  -.1983786E-02  -.1984606E-02  -.1994352E-02  -.2113258E-02  -.2504528E-02
  -.3033162E-02  -.3454417E-02  -.3642393E-02  -.3615653E-02  -.3392551E-02
  -.2930855E-02  -.2429526E-02  -.2096323E-02  -.1982087E-02  -.2011692E-02
  -.2076212E-02  -.2105905E-02  -.2088288E-02  -.2054445E-02  -.2031372E-02
  -.1917458E-02  -.1565085E-02  -.1116936E-02  -.7799661E-03  -.6277069E-03
  -.5143153E-03  -.1961716E-03   .2407043E-03   .5984324E-03   .7767815E-03
   .7975094E-03   .7454480E-03   .6973907E-03   .6871528E-03   .7072883E-03
   .7346025E-03   .7513113E-03   .7509072E-03   .7396881E-03   .7274937E-03
   .7198867E-03   .7172528E-03   .7133096E-03   .6927213E-03   .6641615E-03
   .6509525E-03   .6445180E-03   .6353829E-03   .6240604E-03   .6188563E-03
   .6352918E-03   .6667741E-03   .6901116E-03   .6863597E-03   .6739677E-03
   .6711547E-03   .6782999E-03   .6875718E-03   .6931008E-03   .6937873E-03
   .6907433E-03   .6865387E-03   .6839018E-03   .6822066E-03   .6804992E-03
   .6793812E-03   .6787857E-03   .6775340E-03   .6751523E-03   .6731533E-03
   .6721627E-03   .6725698E-03   .6733719E-03   .6729526E-03   .6711116E-03
   .6684624E-03   .6675875E-03   .6678244E-03   .6672349E-03   .6652420E-03
   .6636258E-03   .6624773E-03   .6626900E-03   .6620944E-03   .6615354E-03
   .6610857E-03   .6599008E-03   .6589226E-03   .6584000E-03   .6590257E-03
   .6599492E-03   .6612736E-03   .6621851E-03   .6628837E-03   .6637281E-03
   .6646578E-03   .6654962E-03   .6664742E-03   .6673430E-03   .6684184E-03
   .6692447E-03   .6715230E-03   .6759644E-03   .6823259E-03   .6894408E-03
   .6953706E-03   .6991802E-03   .7023334E-03   .7060275E-03   .7111737E-03
   .7169094E-03   .7221042E-03   .7247166E-03   .7219642E-03   .7074305E-03
   .6958740E-03   .6846579E-03   .6747054E-03   .6780592E-03   .6670434E-03
   .6304300E-03   .5889679E-03   .5619725E-03   .5540859E-03   .5585759E-03
   .5660978E-03   .5710070E-03   .5712560E-03   .5690928E-03   .5649489E-03
   .5237299E-03   .2523494E-03  -.2163036E-03  -.6452445E-03  -.8972430E-03
  -.9726025E-03  -.9447142E-03  -.8977416E-03  -.8795685E-03  -.8949954E-03
  -.9235220E-03  -.9446359E-03  -.9491869E-03  -.9409724E-03  -.9297259E-03
  -.9220158E-03  -.9203146E-03  -.9224170E-03  -.9253397E-03  -.9263484E-03
  -.9277277E-03  -.9648396E-03  -.1194418E-02  -.1394212E-02  -.1369046E-02
  -.1208897E-02  -.1085769E-02  -.1262025E-02  -.1735156E-02  -.2224327E-02
  -.2527168E-02  -.2616085E-02  -.2570102E-02  -.2481594E-02  -.2396398E-02
  -.2168509E-02  -.1967153E-02  -.1768217E-02  -.1490250E-02  -.1229910E-02
  -.1068570E-02  -.9767941E-03  -.7185134E-03  -.2762149E-03   .1376818E-03
   .3767107E-03   .4339821E-03   .3876744E-03   .3279359E-03   .3060837E-03
   .3235669E-03   .3575220E-03   .3833961E-03   .3902161E-03   .3826210E-03
   .3720913E-03   .3661488E-03   .3674792E-03   .3757544E-03   .4231706E-03
   .6987614E-03   .1169887E-02   .1597436E-02   .1866319E-02   .2139188E-02
   .2316816E-02   .2442144E-02   .2426444E-02   .2214960E-02   .1958593E-02
   .1786863E-02   .1698221E-02   .1495414E-02   .1344932E-02   .1415278E-02
   .1605587E-02   .1738364E-02   .1549865E-02   .1080610E-02   .6188653E-03
   .3578624E-03   .3134108E-03   .3880410E-03   .4712139E-03   .5030575E-03
   .4834624E-03   .4416417E-03   .3716957E-03   .9282348E-04  -.3693102E-03
  -.8217953E-03  -.1315845E-02  -.1824035E-02  -.2194811E-02  -.2366395E-02
  -.2387393E-02  -.2347913E-02  -.2316579E-02  -.2317989E-02  -.2341570E-02
  -.2366196E-02  -.2377382E-02  -.2374320E-02  -.2365443E-02  -.2370250E-02
  -.2397506E-02  -.2431817E-02  -.2455923E-02  -.2464449E-02  -.2461791E-02
  -.2455292E-02  -.2449286E-02  -.2433779E-02  -.2404153E-02  -.2374563E-02
  -.2355762E-02  -.2349112E-02  -.2349376E-02  -.2352577E-02  -.2355396E-02
  -.2356041E-02  -.2354899E-02  -.2353772E-02  -.2352999E-02  -.2351441E-02
  -.2338524E-02  -.2321080E-02  -.2303867E-02  -.2255297E-02  -.2016809E-02
  -.1532153E-02  -.8647913E-03  -.1497715E-03   .3693468E-03   .5971148E-03
   .6048293E-03   .5293626E-03   .4760596E-03   .4785046E-03   .5183479E-03
   .5585637E-03   .5755414E-03   .5552101E-03   .5076562E-03   .4618584E-03
   .4365161E-03   .4319303E-03   .4378433E-03   .4458754E-03   .4482200E-03
   .4447750E-03   .4392650E-03   .4348144E-03   .4337311E-03   .4342597E-03
   .4351339E-03   .4342222E-03   .4325639E-03   .4309884E-03   .4300356E-03
   .4290700E-03   .4273100E-03   .4256455E-03   .4244004E-03   .4240089E-03
   .4232704E-03   .4226190E-03   .4203061E-03   .4167984E-03   .4135984E-03
   .4104644E-03   .4087065E-03   .4079634E-03   .4069316E-03   .3803658E-03
   .1646663E-03  -.2741983E-03  -.7049592E-03  -.9709097E-03  -.1202054E-02
  -.1376539E-02  -.1341364E-02  -.1173523E-02  -.1012175E-02  -.9585494E-03
  -.1174304E-02  -.1650937E-02  -.2103062E-02  -.2195560E-02  -.2032148E-02
  -.1963971E-02  -.2059273E-02  -.2202963E-02  -.2152452E-02  -.1962118E-02
  -.1759843E-02  -.1644586E-02  -.1594577E-02  -.1465670E-02  -.1440435E-02
  -.1492112E-02  -.1410968E-02  -.1226006E-02  -.1037952E-02  -.9138123E-03
  -.8959922E-03  -.1122132E-02  -.1589208E-02  -.2049456E-02  -.2294555E-02
  -.2168724E-02  -.1862996E-02  -.1573814E-02  -.1282858E-02  -.1072965E-02
  -.1120459E-02  -.1509797E-02  -.1994032E-02  -.2335981E-02  -.2472704E-02
  -.2462893E-02  -.2404916E-02  -.2370321E-02  -.2379502E-02  -.2415400E-02
  -.2448568E-02  -.2462354E-02  -.2456990E-02  -.2441460E-02  -.2414375E-02
  -.2263486E-02  -.2014703E-02  -.1965536E-02  -.2105271E-02  -.2140438E-02
  -.1835873E-02  -.1369784E-02  -.9983945E-03  -.8363808E-03  -.8610799E-03
  -.1099797E-02  -.1572399E-02  -.2050294E-02  -.2341889E-02  -.2419953E-02
  -.2372300E-02  -.2304773E-02  -.2279230E-02  -.2300400E-02  -.2339164E-02
  -.2352557E-02  -.2185214E-02  -.1604662E-02  -.7138248E-03   .7697821E-04
   .5018780E-03   .5645201E-03   .4300355E-03   .2834598E-03   .2263580E-03
   .2568707E-03   .3211411E-03   .3680101E-03   .3772206E-03   .3574005E-03
   .3291957E-03   .3095822E-03   .3055958E-03   .3220852E-03   .3584430E-03
   .3949222E-03   .4164669E-03   .4352287E-03   .5892160E-03   .9849514E-03
   .1445844E-02   .1919947E-02   .2455319E-02   .2909310E-02   .3168277E-02
   .3241892E-02   .3216506E-02   .3177055E-02   .3166731E-02   .3185342E-02
   .3212330E-02   .3229275E-02   .3230010E-02   .3220658E-02   .3209728E-02
   .3203511E-02   .3204908E-02   .3210163E-02   .3212624E-02   .3186484E-02
   .3005275E-02   .2698482E-02   .2441142E-02   .2007781E-02   .1336228E-02
   .6985248E-03   .3140864E-03   .2043580E-03   .2552766E-03   .3351407E-03
   .3681354E-03   .3466018E-03   .3022198E-03   .2682062E-03   .2601247E-03
   .2731781E-03   .2915632E-03   .3037114E-03   .3060257E-03   .2976222E-03
   .1605795E-03  -.2225343E-03  -.6819645E-03  -.1150563E-02  -.1674356E-02
  -.2115649E-02  -.2366075E-02  -.2437401E-02  -.2411988E-02  -.2373860E-02
  -.2364087E-02  -.2383348E-02  -.2411906E-02  -.2431015E-02  -.2435063E-02
  -.2430185E-02  -.2425749E-02  -.2436164E-02  -.2468409E-02  -.2506287E-02
  -.2533454E-02  -.2545241E-02  -.2545199E-02  -.2542108E-02  -.2541464E-02
  -.2543288E-02  -.2546217E-02  -.2549170E-02  -.2551723E-02  -.2554136E-02
  -.2556785E-02  -.2559034E-02  -.2560712E-02  -.2562583E-02  -.2563010E-02
  -.2553399E-02  -.2525474E-02  -.2494220E-02  -.2473345E-02  -.2467196E-02
  -.2471304E-02  -.2477843E-02  -.2482375E-02  -.2483713E-02  -.2483471E-02
  -.2483386E-02  -.2484505E-02  -.2485296E-02  -.2487228E-02  -.2489319E-02
  -.2477642E-02  -.2318406E-02  -.1894259E-02  -.1270580E-02  -.5473658E-03
   .1222443E-04   .2619800E-03   .2633402E-03   .1669514E-03   .9248431E-04
   .8274999E-04   .1189252E-03   .1613586E-03   .1822712E-03   .1774583E-03
   .1601534E-03   .1519745E-03   .2601735E-03   .6435017E-03   .1240458E-02
   .1973091E-02   .2596162E-02   .2936570E-02   .3010404E-02   .2947457E-02
   .2875286E-02   .2855514E-02   .2884837E-02   .2928813E-02   .2965729E-02
   .2996776E-02   .3018637E-02   .3028054E-02   .3030058E-02   .3029486E-02
   .3027723E-02   .3026204E-02   .3025182E-02   .3024537E-02   .3022476E-02
   .3019329E-02   .3015688E-02   .3012048E-02   .3008389E-02   .2997154E-02
   .2967643E-02   .2931898E-02   .2905454E-02   .2893684E-02   .2893265E-02
   .2896721E-02   .2897699E-02   .2888590E-02   .2762192E-02   .2269758E-02
   .1417757E-02   .5853017E-03   .8234950E-04  -.5460833E-04   .2438372E-04
   .1397036E-03   .1874047E-03   .1574618E-03   .9538958E-04   .4713388E-04
   .3327998E-04   .4671906E-04   .6800212E-04   .8124071E-04   .8193861E-04
   .7437933E-04   .6601804E-04   .6886681E-04   .9465818E-04   .1300738E-03
   .1566428E-03   .1667645E-03   .1643515E-03   .1574333E-03   .1518577E-03
   .1503805E-03   .1508930E-03   .1442815E-03   .1184459E-03   .8567770E-04
   .6111497E-04   .5036278E-04   .5023128E-04   .5406126E-04   .5613835E-04
   .5482507E-04   .5133663E-04   .4655399E-04   .4146150E-04   .3723482E-04
   .3484002E-04   .3243915E-04   .2867727E-04   .2440501E-04   .1984718E-04
   .1566302E-04   .1286113E-04   .1053619E-04   .8174798E-05   .1387309E-04
   .3898390E-04   .7144048E-04   .9537864E-04   .1049078E-03   .1032117E-03
   .1046599E-03   .2154257E-03   .5953603E-03   .1187401E-02   .1917150E-02
   .2541556E-02   .2887086E-02   .2967107E-02   .2908380E-02   .2836549E-02
   .2808575E-02   .2811982E-02   .2823708E-02   .2828083E-02   .2822163E-02
   .2810171E-02   .2799372E-02   .2793537E-02   .2792319E-02   .2792538E-02
   .2793997E-02   .2794589E-02   .2792387E-02   .2789139E-02   .2787519E-02
   .2793144E-02   .2802611E-02   .2692771E-02   .2301764E-02   .1694814E-02
   .9538364E-03   .3254955E-03  -.1747368E-04  -.9374857E-04  -.3306948E-04
   .3736903E-04   .5661650E-04   .2743748E-04  -.1608069E-04  -.4495744E-04
  -.4902779E-04  -.3619192E-04  -.2029988E-04  -.2042800E-05   .1481379E-04
   .1338341E-04   .1156475E-06  -.3793703E-05   .7474559E-05   .1354792E-04
   .8851732E-05  -.1821630E-05  -.1227019E-04  -.1832130E-04  -.2066309E-04
  -.2125349E-04  -.2142770E-04  -.2219734E-04  -.2355788E-04  -.2477867E-04
  -.2594022E-04  -.2677519E-04  -.2723801E-04  -.2768109E-04  -.2815000E-04
  -.2874195E-04  -.2162205E-04  -.1048446E-04  -.1263364E-03  -.3579798E-03
  -.4207663E-03  -.4490294E-03  -.8226047E-03  -.1566098E-02  -.2310607E-02
  -.2749730E-02  -.2711846E-02  -.2238579E-02  -.1822215E-02  -.1868280E-02
  -.2246323E-02  -.2647021E-02  -.2869724E-02  -.2891597E-02  -.2803393E-02
  -.2711222E-02  -.2684248E-02  -.2730685E-02  -.2804884E-02  -.2859749E-02
  -.2877089E-02  -.2866658E-02  -.2848091E-02  -.2837222E-02  -.2837563E-02
  -.2844698E-02  -.2851349E-02  -.2855859E-02  -.2856780E-02  -.2855071E-02
  -.2853890E-02  -.2853211E-02  -.2852792E-02  -.2853839E-02  -.2855348E-02
  -.2857457E-02  -.2858381E-02  -.2858242E-02  -.2859039E-02  -.2861131E-02
  -.2864487E-02  -.2867726E-02  -.2872569E-02  -.2877437E-02  -.2881679E-02
  -.2884317E-02  -.2885832E-02  -.2887279E-02  -.2880117E-02  -.2855923E-02
  -.2826869E-02  -.2805520E-02  -.2769346E-02  -.2451723E-02  -.1646022E-02
  -.7486363E-03  -.1514853E-03   .4664886E-04  -.2064909E-04  -.1570544E-03
  -.2327614E-03  -.2195537E-03  -.1580545E-03  -.1013311E-03  -.7886359E-04
  -.9011740E-04  -.1149205E-03  -.1208518E-03   .1925738E-04   .2906061E-03
   .5279176E-03   .9552836E-03   .1627496E-02   .2265879E-02   .2648452E-02
   .2755144E-02   .2698868E-02   .2613695E-02   .2576411E-02   .2595829E-02
   .2649794E-02   .2711390E-02   .2751909E-02   .2760596E-02   .2747557E-02
   .2729831E-02   .2719659E-02   .2718048E-02   .2719669E-02   .2720585E-02
   .2718652E-02   .2714100E-02   .2698622E-02   .2664918E-02   .2615295E-02
   .2444422E-02   .2169679E-02   .1969708E-02   .1858150E-02   .1863683E-02
   .1871347E-02   .1749998E-02   .1327058E-02   .8416687E-03   .3487412E-03
   .4475951E-05   .1314155E-03   .7697428E-03   .1315108E-02   .1350603E-02
   .8372725E-03   .1719412E-03  -.2799192E-03  -.4100665E-03  -.3227084E-03
  -.1851908E-03  -.1105557E-03  -.1220405E-03  -.1791462E-03  -.2217185E-03
  -.2148571E-03  -.1737124E-03  -.1307024E-03  -.1076336E-03  -.1079752E-03
  -.1224494E-03  -.1377803E-03  -.1458596E-03  -.1456544E-03  -.1289409E-03
   .9417407E-04   .8131712E-03   .1726965E-02   .2406954E-02   .2687754E-02
   .2664115E-02   .2530437E-02   .2437424E-02   .2434193E-02   .2489410E-02
   .2548885E-02   .2570131E-02   .2455782E-02   .2172523E-02   .1942745E-02
   .1692515E-02   .1446765E-02   .1172962E-02   .7347482E-03   .2493821E-03
  -.1067267E-03  -.2530732E-03  -.2396659E-03  -.1703199E-03  -.1225838E-03
  -.1204731E-03  -.1470039E-03  -.1754679E-03  -.1886628E-03  -.1857516E-03
  -.1761881E-03  -.1758569E-03  -.2848510E-03  -.5572206E-03  -.7826238E-03
  -.1047842E-02  -.1433039E-02  -.2003661E-02  -.2578449E-02  -.2973525E-02
  -.3137754E-02  -.3138926E-02  -.3084102E-02  -.3049836E-02  -.3058216E-02
  -.3091708E-02  -.3123228E-02  -.3138058E-02  -.3130422E-02  -.3007040E-02
  -.2619805E-02  -.2027176E-02  -.1294231E-02  -.6495424E-03  -.2761430E-03
  -.1741665E-03  -.2236807E-03  -.2947035E-03  -.3190875E-03  -.2937162E-03
  -.2509494E-03  -.2221876E-03  -.2181669E-03  -.2319790E-03  -.2494184E-03
  -.2594027E-03  -.2593556E-03  -.2544053E-03  -.2487259E-03  -.2462424E-03
  -.2476050E-03  -.2520784E-03  -.2572627E-03  -.2599134E-03  -.2599758E-03
  -.2593819E-03  -.2601977E-03  -.2707955E-03  -.3027139E-03  -.3422453E-03
  -.3715936E-03  -.3845247E-03  -.3847937E-03  -.3810403E-03  -.3790369E-03
  -.3804845E-03  -.3846239E-03  -.3886235E-03  -.3905572E-03  -.3890216E-03
  -.3865503E-03  -.3854158E-03  -.3861040E-03  -.3885785E-03  -.3911017E-03
  -.3935397E-03  -.3953520E-03  -.3960706E-03  -.3891943E-03  -.3631243E-03
  -.3284021E-03  -.3018035E-03  -.2899267E-03  -.2900499E-03  -.2958236E-03
  -.2997260E-03  -.3001287E-03  -.2987086E-03  -.2979629E-03  -.2984932E-03
  -.3007491E-03  -.3036246E-03  -.3064091E-03  -.3076746E-03  -.2947103E-03
  -.7404112E-04   .6438863E-03   .1557354E-02   .2237041E-02   .2516549E-02
   .2489175E-02   .2352027E-02   .2256471E-02   .2251918E-02   .2306933E-02
   .2365813E-02   .2391759E-02   .2389469E-02   .2389404E-02   .2400388E-02
   .2416830E-02   .2430377E-02   .2435750E-02   .2432395E-02   .2425876E-02
   .2419856E-02   .2416923E-02   .2417161E-02   .2419476E-02   .2420695E-02
   .2421273E-02   .2421424E-02   .2420903E-02   .2420921E-02   .2422513E-02
   .2424716E-02   .2425779E-02   .2425218E-02   .2423772E-02   .2420223E-02
   .2388398E-02   .2064232E-02   .1235793E-02   .2890814E-03  -.3737076E-03
  -.6267262E-03  -.5883366E-03  -.4581006E-03  -.3784989E-03  -.3880316E-03
  -.4505643E-03  -.5123855E-03  -.5417735E-03  -.5352186E-03  -.5008634E-03
  -.4533744E-03  -.4155329E-03  -.4001281E-03  -.4030233E-03  -.4138645E-03
  -.4234766E-03  -.4278321E-03  -.4275323E-03  -.4251218E-03  -.4239812E-03
  -.4248025E-03  -.4271483E-03  -.4296936E-03  -.4315960E-03  -.4325218E-03
  -.4330820E-03  -.4337115E-03  -.4346259E-03  -.4357098E-03  -.4371993E-03
  -.4385635E-03  -.4400762E-03  -.4408900E-03  -.4419096E-03  -.4416963E-03
  -.4409986E-03  -.4508724E-03  -.4793725E-03  -.5137413E-03  -.5378309E-03
  -.5461400E-03  -.5425366E-03  -.5354321E-03  -.5305968E-03  -.5164654E-03
  -.2898109E-03   .4533699E-03   .1402844E-02   .2112460E-02   .2407598E-02
   .2384521E-02   .2246231E-02   .2149071E-02   .2144698E-02   .2202168E-02
   .2263301E-02   .2290307E-02   .2280609E-02   .2253660E-02   .2230794E-02
   .2222217E-02   .2225987E-02   .2235144E-02   .2242642E-02   .2243361E-02
   .2238984E-02   .2234650E-02   .2233491E-02   .2234470E-02   .2235124E-02
   .2236213E-02   .2236958E-02   .2236634E-02   .2234721E-02   .2230715E-02
   .2226952E-02   .2224253E-02   .2223278E-02   .2221685E-02   .2218596E-02
   .2215052E-02   .2211580E-02   .2200903E-02   .2075117E-02   .1590137E-02
   .8461398E-03   .2707797E-03  -.1330575E-03  -.3937646E-03  -.5237485E-03
  -.5672117E-03  -.5756470E-03  -.5040339E-03  -.5234974E-03  -.5452417E-03
  -.5599700E-03  -.5647355E-03  -.5622794E-03  -.5583257E-03  -.5571208E-03
  -.5588099E-03  -.5620254E-03  -.5561337E-03  -.5295051E-03  -.4941541E-03
  -.4678623E-03  -.4580810E-03  -.4595884E-03  -.4640094E-03  -.4669127E-03
  -.4667643E-03  -.4649859E-03  -.4698508E-03  -.4939533E-03  -.5280732E-03
  -.5549364E-03  -.5685119E-03  -.5697925E-03  -.5666835E-03  -.5637861E-03
  -.5619360E-03  -.5619555E-03  -.5636547E-03  -.5657493E-03  -.5674032E-03
  -.5677587E-03  -.5671076E-03  -.5675846E-03  -.5688499E-03  -.5691506E-03
  -.5685032E-03  -.5677301E-03  -.5623237E-03  -.5405160E-03  -.5085016E-03
  -.4823713E-03  -.4702714E-03  -.4705549E-03  -.4765759E-03  -.4815092E-03
  -.4826157E-03  -.4796645E-03  -.4754539E-03  -.4728983E-03  -.4729861E-03
  -.4751113E-03  -.4774116E-03  -.4791847E-03  -.4805033E-03  -.4811706E-03
  -.4872126E-03  -.5108460E-03  -.5456323E-03  -.5741224E-03  -.5880165E-03
  -.5842136E-03  -.5629459E-03  -.5438977E-03  -.5272232E-03  -.5112173E-03
  -.5020708E-03  -.4996916E-03  -.5010901E-03  -.5030895E-03  -.5046559E-03
  -.5047856E-03  -.5071130E-03  -.5232633E-03  -.5374750E-03  -.5353000E-03
  -.5225011E-03  -.5101320E-03  -.5038571E-03  -.5046130E-03  -.5102786E-03
  -.5166463E-03  -.5204214E-03  -.5214411E-03  -.5202997E-03  -.5191961E-03
  -.5189545E-03  -.5228033E-03  -.5420575E-03  -.5624754E-03  -.5813020E-03
  -.6005200E-03  -.6145073E-03  -.6195596E-03  -.6168814E-03  -.5723620E-03
  -.2696731E-03   .4394792E-03   .1218595E-02   .1320927E-02   .6720680E-03
  -.1679202E-03  -.7306280E-03  -.8986301E-03  -.8117671E-03  -.6652432E-03
  -.5879075E-03  -.6047087E-03  -.6722295E-03  -.7325687E-03  -.7556313E-03
  -.7436124E-03  -.7179179E-03  -.6981018E-03  -.6924809E-03  -.6974178E-03
  -.7055707E-03  -.7106296E-03  -.7103771E-03  -.7070474E-03  -.7027631E-03
  -.7001570E-03  -.6993662E-03  -.6994619E-03  -.6991738E-03  -.6949932E-03
  -.6778144E-03  -.6564208E-03  -.6387808E-03  -.6193822E-03  -.6027799E-03
  -.5919324E-03  -.5879483E-03  -.5882406E-03  -.5992578E-03  -.6251377E-03
  -.6437268E-03  -.6351461E-03  -.6095689E-03  -.5852709E-03  -.5722574E-03
  -.5706674E-03  -.5745590E-03  -.5783185E-03  -.5782994E-03  -.5757612E-03
  -.5717831E-03  -.5689949E-03  -.5675002E-03  -.5656516E-03  -.5543806E-03
  -.5264027E-03  -.4958195E-03  -.4848347E-03  -.4954075E-03  -.5021402E-03
  -.4967950E-03  -.4851870E-03  -.4746209E-03  -.4696826E-03  -.4713377E-03
  -.4747845E-03  -.4764318E-03  -.4760146E-03  -.4734363E-03  -.4708137E-03
  -.4686204E-03  -.4682895E-03  -.4698041E-03  -.4714855E-03  -.4721454E-03
  -.4777921E-03  -.4995311E-03  -.5286508E-03  -.5510077E-03  -.5542790E-03
  -.4514798E-03  -.1110904E-03   .4117437E-03   .1055685E-02   .1609808E-02
   .1905518E-02   .1957026E-02   .1884462E-02   .1806713E-02   .1779914E-02
   .1799624E-02   .1839509E-02   .1872492E-02   .1872807E-02   .1843440E-02
   .1806688E-02   .1781191E-02   .1770964E-02   .1774941E-02   .1854841E-02
   .2081963E-02   .2264585E-02   .2443570E-02   .2709553E-02   .3142302E-02
   .3620630E-02   .3957722E-02   .4086872E-02   .4062941E-02   .3983765E-02
   .3922654E-02   .3901007E-02   .3903701E-02   .3907262E-02   .3895895E-02
   .3868893E-02   .3832619E-02   .3790500E-02   .3641473E-02   .3210776E-02
   .2876511E-02   .2663828E-02   .2322575E-02   .1884576E-02   .1522270E-02
   .1327954E-02   .1282714E-02   .1310066E-02   .1340324E-02   .1340189E-02
   .1312776E-02   .1277833E-02   .1249227E-02   .1217691E-02   .1121798E-02
   .6585078E-03  -.1108200E-03  -.7974002E-03  -.1164111E-02  -.1222010E-02
  -.1123548E-02  -.1020604E-02  -.9877530E-03  -.1018710E-02  -.1070538E-02
  -.1104060E-02  -.1106504E-02  -.1086701E-02  -.1061946E-02  -.1045619E-02
  -.1041092E-02  -.1043171E-02  -.1047102E-02  -.1059539E-02  -.1079527E-02
  -.1096637E-02  -.1103223E-02  -.1101238E-02  -.1094162E-02  -.1086339E-02
  -.1079619E-02  -.1064143E-02  -.1038960E-02  -.1013591E-02  -.9967090E-03
  -.9891769E-03  -.9862074E-03  -.9751503E-03  -.9598566E-03  -.9444337E-03
  -.9275610E-03  -.9120840E-03  -.9011949E-03  -.8765250E-03  -.7341963E-03
  -.5482337E-03  -.4057657E-03  -.3675749E-03  -.5093301E-03  -.7213605E-03
  -.8774825E-03  -.9230684E-03  -.8806864E-03  -.8131600E-03  -.7687713E-03
  -.7671104E-03  -.7934479E-03  -.8128422E-03  -.8112585E-03  -.7953391E-03
  -.7767955E-03  -.7709872E-03  -.7857369E-03  -.8090150E-03  -.8257228E-03
  -.8300050E-03  -.8240197E-03  -.8142466E-03  -.8062320E-03  -.8015401E-03
  -.7983572E-03  -.7958809E-03  -.7931499E-03  -.7895845E-03  -.7774561E-03
  -.6824952E-03  -.5292292E-03  -.5147747E-03  -.6306721E-03  -.7717864E-03
  -.8551170E-03  -.8051221E-03  -.6227464E-03  -.5431233E-03  -.6226195E-03
  -.7673877E-03  -.8803091E-03  -.9204863E-03  -.9016332E-03  -.8610527E-03
  -.8306673E-03  -.8199707E-03  -.8238115E-03  -.8358889E-03  -.8542991E-03
  -.8705600E-03  -.8772692E-03  -.8740921E-03  -.8660726E-03  -.8576679E-03
  -.8515329E-03  -.8470686E-03  -.8430005E-03  -.8383499E-03  -.8330218E-03
  -.8267675E-03  -.8202937E-03  -.8137162E-03  -.8080306E-03  -.8028721E-03
  -.7985037E-03  -.7946710E-03  -.7905900E-03  -.7856320E-03  -.7807336E-03
  -.7752227E-03  -.7699688E-03  -.7652045E-03  -.7599435E-03  -.7512701E-03
  -.7316011E-03  -.7054997E-03  -.6839734E-03  -.6723496E-03  -.6680948E-03
  -.6663910E-03  -.6624709E-03  -.6345610E-03  -.4837187E-03  -.3450907E-03
  -.3498046E-03  -.4500326E-03  -.5551122E-03  -.6103629E-03  -.6100060E-03
  -.5712405E-03  -.5249644E-03  -.4972604E-03  -.4995373E-03  -.5126294E-03
  -.5168303E-03  -.5082484E-03  -.4938275E-03  -.4802577E-03  -.4718514E-03
  -.4678594E-03  -.4656891E-03  -.4632670E-03  -.4590139E-03  -.4536104E-03
  -.4467273E-03  -.4312472E-03  -.4086540E-03  -.3880229E-03  -.3746814E-03
  -.3690433E-03  -.3681153E-03  -.3734366E-03  -.3781384E-03  -.3730164E-03
  -.3609844E-03  -.3484323E-03  -.3397671E-03  -.3352207E-03  -.3327811E-03
  -.3300885E-03  -.3259145E-03  -.3196694E-03  -.3129688E-03  -.3072266E-03
  -.3021072E-03  -.2970073E-03  -.2917907E-03  -.2869449E-03  -.2823944E-03
  -.2785283E-03  -.2787827E-03  -.2874627E-03  -.2977938E-03  -.3022130E-03
  -.2998789E-03  -.2931717E-03  -.2856277E-03  -.2780692E-03  -.2646227E-03
  -.1833289E-03   .1457836E-04   .2406324E-03   .4601488E-03   .6959388E-03
   .8879698E-03   .9897414E-03   .1009434E-02   .9859986E-03   .9567805E-03
   .9402194E-03   .9364185E-03   .9359605E-03   .9311643E-03   .9196628E-03
   .9036559E-03   .8866169E-03   .8686738E-03   .8058494E-03   .6313401E-03
   .3702454E-03   .5528248E-04  -.2090655E-03  -.3507964E-03  -.3787494E-03
  -.3489237E-03  -.3151565E-03  -.3039416E-03  -.3132537E-03  -.3277840E-03
  -.3353179E-03  -.3324955E-03  -.3229562E-03  -.3123842E-03  -.3044628E-03
  -.2996805E-03  -.2969174E-03  -.2937691E-03  -.2897217E-03  -.2843295E-03
  -.2785250E-03  -.2727534E-03  -.2676296E-03  -.2630236E-03  -.2582960E-03
  -.2533510E-03  -.2483662E-03  -.2434862E-03  -.2384751E-03  -.2333249E-03
  -.2285166E-03  -.2236290E-03  -.2188986E-03  -.2138266E-03  -.2088692E-03
  -.2011944E-03  -.1874697E-03  -.1713863E-03  -.1586570E-03  -.1515477E-03
  -.1487784E-03  -.1473406E-03  -.1448562E-03  -.1406754E-03  -.1356671E-03
  -.1306925E-03  -.1266909E-03  -.1239448E-03  -.1236896E-03  -.1280489E-03
  -.1333051E-03  -.1354617E-03  -.1330905E-03  -.1280128E-03  -.1221378E-03
  -.1168966E-03  -.1118891E-03  -.1072559E-03  -.1024104E-03  -.9769949E-04
  -.9318197E-04  -.8874348E-04  -.8430387E-04  -.8014875E-04  -.7577657E-04
  -.7177950E-04  -.6749366E-04  -.6335511E-04  -.5924031E-04  -.5510847E-04
  -.5104278E-04  -.4686836E-04  -.4265581E-04  -.3802008E-04  -.3359128E-04
  -.2899690E-04  -.2330013E-04  -.1338390E-04  -.4278233E-06   .2778906E-04
   .1087421E-03   .2195850E-03   .3073123E-03   .3476034E-03   .3636962E-03
   .4157201E-03   .4996609E-03   .5692602E-03   .5983902E-03   .5917637E-03
   .5686059E-03   .5463648E-03   .5327159E-03   .5264119E-03   .5223960E-03
   .5162237E-03   .5067544E-03   .4950272E-03   .4832031E-03   .4723689E-03
   .4627577E-03   .4539158E-03   .4450432E-03   .4359437E-03   .4264771E-03
   .4169000E-03   .4075104E-03   .3984369E-03   .3894823E-03   .3806265E-03
   .3727103E-03   .3678836E-03   .3646357E-03   .3584321E-03   .3498761E-03
   .3357228E-03   .2861759E-03   .2071898E-03   .1309379E-03   .5168680E-04
  -.2551249E-04  -.7849629E-04  -.1003756E-03  -.9996555E-04  -.9173974E-04
  -.8745934E-04  -.8975176E-04  -.9447031E-04  -.9701476E-04  -.9609082E-04
  -.9201507E-04  -.8476771E-04  -.7641793E-04  -.6997476E-04  -.6819612E-04
  -.6805955E-04  -.6624595E-04  -.6282370E-04  -.6029238E-04  -.5793684E-04
  -.5438204E-04  -.5042791E-04  -.4706787E-04  -.4616890E-04  -.4716721E-04
  -.4768455E-04  -.4519077E-04  -.4138051E-04  -.3854136E-04  -.3682968E-04
  -.3545320E-04  -.3372250E-04  -.3143110E-04  -.2884816E-04  -.2611185E-04
  -.2351015E-04  -.2105066E-04  -.1877302E-04  -.1657888E-04  -.1444488E-04
  -.1198400E-04  -.6666949E-05   .1521030E-04   .4936372E-04   .7786880E-04
   .9404125E-04   .1113961E-03   .1222503E-03   .1306908E-03   .1438226E-03
   .1560205E-03   .1621667E-03   .1613411E-03   .1562244E-03   .1499778E-03
   .1445079E-03   .1393756E-03   .1341546E-03   .1291071E-03   .1245964E-03
   .1205533E-03   .1167994E-03   .1130386E-03   .1084365E-03   .1031727E-03
   .9821282E-04   .9416456E-04   .9083900E-04   .8803003E-04   .8526829E-04
   .8235947E-04   .7935655E-04   .7634482E-04   .7337540E-04   .7000141E-04
   .6654519E-04   .6331918E-04   .5999686E-04   .5686234E-04   .5400146E-04
   .5147513E-04   .4864482E-04   .4531741E-04   .4209464E-04   .3937403E-04
   .3721610E-04   .3543178E-04   .3373606E-04   .3196086E-04   .2928450E-04
   .2090761E-04   .6147014E-05  -.8609996E-05  -.2271261E-04  -.3648530E-04
  -.4608899E-04  -.4968173E-04  -.4863428E-04  -.4557575E-04  -.4260765E-04
  -.4047961E-04  -.3906762E-04  -.3767919E-04  -.3601627E-04  -.3406507E-04
  -.3192109E-04  -.2988505E-04  -.2797762E-04  -.2626354E-04  -.2461769E-04
  -.2298807E-04  -.2139599E-04  -.1983924E-04  -.1844966E-04  -.1724783E-04
  -.1600576E-04  -.1464853E-04  -.1322686E-04  -.1192157E-04  -.1072053E-04
  -.9569422E-05  -.8652806E-05  -.7741633E-05  -.6703273E-05  -.5563318E-05
  -.4334814E-05  -.3113764E-05  -.1979683E-05  -.1011058E-05  -.3038451E-06
   .2646644E-06   .8585243E-06   .1651029E-05   .2499461E-05   .3351749E-05
   .4215506E-05   .5081771E-05   .5951270E-05   .6763784E-05   .7571196E-05
   .8321049E-05   .8895359E-05   .9355447E-05   .9850998E-05   .1043882E-04
   .1115911E-04   .1191826E-04   .1259503E-04   .1318708E-04   .1366018E-04
   .1408768E-04   .1447393E-04   .1485761E-04   .1518177E-04   .1547747E-04
   .1576380E-04   .1597873E-04   .1619896E-04   .1640608E-04   .1660151E-04
   .1674872E-04   .1683829E-04   .1692268E-04   .1701532E-04   .1714561E-04
   .1728622E-04   .1740271E-04   .1747146E-04   .1751260E-04   .1752664E-04
   .1749380E-04   .1743384E-04   .1735952E-04   .1726272E-04   .1715908E-04
   .1703236E-04   .1688174E-04   .1672427E-04   .1651348E-04   .1627834E-04
   .1603574E-04   .1581030E-04   .1557113E-04   .1533430E-04   .1508481E-04
   .1484640E-04   .1461046E-04   .1436649E-04   .1409895E-04   .1381513E-04
   .1353217E-04   .1323201E-04   .1291156E-04   .1256737E-04   .1221844E-04
   .1188667E-04   .1156262E-04   .1123918E-04   .1089464E-04   .1053196E-04
   .1016265E-04   .9793736E-05   .9429782E-05   .9064261E-05   .8697152E-05
   .8329946E-05   .7968298E-05   .7611988E-05   .7251748E-05   .6895446E-05
   .6534565E-05   .6168953E-05   .5795325E-05   .5418991E-05   .5046940E-05
   .4678416E-05   .4319115E-05   .3963021E-05   .3614258E-05   .3268936E-05
   .2929737E-05   .2597633E-05   .2271841E-05   .1953935E-05   .1642859E-05
   .1340440E-05   .1046794E-05   .7616145E-06   .4865124E-06   .2215479E-06
  -.3313132E-07  -.2775443E-06  -.5110241E-06  -.7328717E-06  -.9425907E-06
  -.1140364E-05  -.1325616E-05  -.1497847E-05  -.1656984E-05  -.1802589E-05
  -.1934189E-05  -.2051582E-05  -.2154382E-05  -.2242281E-05  -.2314962E-05
  -.2372101E-05
