# Supplementary material for: Earthquake Response Analysis of Tall Reinforced Concrete Chimneys considering Eccentricity
Source: Hindawi journal article supplement (doi:10.1155/2020/1417969), 2020-03-11
Supplement: f1 [file 1417969.f1.zip › 1417969.f1/Four kinds of earthquake records/Stiff soil/MORGAN HVR240.txt]

PEER STRONG MOTION DATABASE RECORD. PROCESSING BY PACIFIC ENGINEERING.
MORGAN HILL 04/24/84 04:24, HALLS VALLEY, 240 (CDMG STATION 57191)
ACCELERATION TIME HISTORY IN UNITS OF G. FILTER POINTS: HP=0.2 Hz LP=30.0 Hz
NPTS=  7996, DT= .00500 SEC
  -.1145561E-02  -.1231238E-02  -.1230690E-02  -.1226394E-02  -.1224088E-02
  -.1222980E-02  -.1221217E-02  -.1215641E-02  -.1203831E-02  -.1182119E-02
  -.1159878E-02  -.1141568E-02  -.1133520E-02  -.1140465E-02  -.1159133E-02
  -.1190843E-02  -.1227683E-02  -.1270815E-02  -.1312698E-02  -.1344249E-02
  -.1360642E-02  -.1358701E-02  -.1316649E-02  -.1237991E-02  -.1138478E-02
  -.1050444E-02  -.1012291E-02  -.1050214E-02  -.1125298E-02  -.1188333E-02
  -.1204341E-02  -.1151842E-02  -.1005794E-02  -.7856548E-03  -.5424186E-03
  -.3436976E-03  -.2637758E-03  -.3750870E-03  -.7162680E-03  -.1234775E-02
  -.1800776E-02  -.2270107E-02  -.2497553E-02  -.2386496E-02  -.1936186E-02
  -.1199793E-02  -.3183742E-03   .4256077E-03   .7822202E-03   .6565151E-03
   .7749273E-04  -.7039546E-03  -.1411203E-02  -.1902271E-02  -.2144724E-02
  -.2208406E-02  -.2215334E-02  -.2245252E-02  -.2322405E-02  -.2461890E-02
  -.2634124E-02  -.2724231E-02  -.2715688E-02  -.2525088E-02  -.1921807E-02
  -.8625639E-03   .4352977E-03   .1661001E-02   .2469984E-02   .2701390E-02
   .2464757E-02   .1992482E-02   .1506457E-02   .8741371E-03  -.1679912E-03
  -.1566659E-02  -.2978264E-02  -.4047775E-02  -.4581296E-02  -.4472617E-02
  -.3615538E-02  -.1963366E-02   .3488861E-03   .2822775E-02   .4806656E-02
   .5903684E-02   .5971909E-02   .5109585E-02   .3485343E-02   .9794140E-03
  -.2349066E-02  -.5784919E-02  -.8362222E-02  -.9484766E-02  -.9298262E-02
  -.8332763E-02  -.7071405E-02  -.5779127E-02  -.4546540E-02  -.3454147E-02
  -.2354269E-02  -.1089199E-02   .4436599E-03   .2217842E-02   .3899610E-02
   .5169054E-02   .6023514E-02   .6461555E-02   .6255149E-02   .5298280E-02
   .3689457E-02   .1478269E-02  -.1286913E-02  -.4311743E-02  -.7053618E-02
  -.8938432E-02  -.9602499E-02  -.9172868E-02  -.7945492E-02  -.6004915E-02
  -.3341270E-02  -.2301690E-03   .2454318E-02   .4083881E-02   .4160418E-02
   .2179131E-02  -.1923037E-02  -.7586396E-02  -.1303687E-01  -.1646853E-01
  -.1721292E-01  -.1594320E-01  -.1381963E-01  -.1122861E-01  -.7787242E-02
  -.3132363E-02   .2597804E-02   .8766387E-02   .1398695E-01   .1685754E-01
   .1691250E-01   .1499060E-01   .1193902E-01   .8385823E-02   .4720889E-02
   .9178017E-03  -.2784110E-02  -.5861551E-02  -.8166881E-02  -.9664731E-02
  -.1023666E-01  -.9742736E-02  -.8223972E-02  -.6157539E-02  -.4162522E-02
  -.2541878E-02  -.1658023E-02  -.1759388E-02  -.3024922E-02  -.4916249E-02
  -.6349843E-02  -.6797971E-02  -.6301298E-02  -.5105020E-02  -.3884219E-02
  -.2860157E-02  -.1754653E-02  -.1332316E-03   .1851359E-02   .3334493E-02
   .3591120E-02   .2276542E-02  -.1797724E-03  -.2729558E-02  -.4074103E-02
  -.3423027E-02  -.7907456E-03   .3111960E-02   .7662503E-02   .1159350E-01
   .1360465E-01   .1282432E-01   .9177466E-02   .3002854E-02  -.4522310E-02
  -.1154541E-01  -.1629493E-01  -.1791033E-01  -.1623288E-01  -.1191914E-01
  -.5741957E-02   .1196490E-02   .8023287E-02   .1417590E-01   .1911228E-01
   .2288645E-01   .2556841E-01   .2708191E-01   .2693626E-01   .2504457E-01
   .2188736E-01   .1849357E-01   .1579637E-01   .1371158E-01   .1174381E-01
   .9812861E-02   .8049114E-02   .6592205E-02   .5576937E-02   .4639124E-02
   .2988262E-02  -.3167678E-04  -.4603382E-02  -.1020648E-01  -.1523295E-01
  -.1809784E-01  -.1810467E-01  -.1604347E-01  -.1325371E-01  -.1154763E-01
  -.1189334E-01  -.1453426E-01  -.1846980E-01  -.2245173E-01  -.2530795E-01
  -.2564994E-01  -.2290165E-01  -.1720655E-01  -.8963827E-02   .4457893E-03
   .8741522E-02   .1358550E-01   .1373970E-01   .9334715E-02   .1568009E-02
  -.7683235E-02  -.1656085E-01  -.2367073E-01  -.2780805E-01  -.2839256E-01
  -.2561111E-01  -.2048427E-01  -.1408634E-01  -.7976931E-02  -.3535341E-02
  -.1064240E-02   .1106987E-03   .7633044E-03   .1673383E-02   .3859669E-02
   .8046508E-02   .1461199E-01   .2278785E-01   .3064141E-01   .3654275E-01
   .3973363E-01   .3993140E-01   .3756476E-01   .3417082E-01   .3149632E-01
   .2928326E-01   .2656532E-01   .2238641E-01   .1641263E-01   .9248558E-02
   .1708799E-02  -.4966676E-02  -.9916810E-02  -.1285668E-01  -.1368995E-01
  -.1292242E-01  -.1146234E-01  -.9840903E-02  -.7438379E-02  -.3868627E-02
   .3781741E-03   .4406457E-02   .7744825E-02   .1001637E-01   .1100774E-01
   .1113884E-01   .1125592E-01   .1183672E-01   .1304373E-01   .1460709E-01
   .1620434E-01   .1763836E-01   .1892744E-01   .2015564E-01   .2140283E-01
   .2234284E-01   .2233210E-01   .2158386E-01   .2081324E-01   .2025743E-01
   .1991345E-01   .1999859E-01   .2045771E-01   .2089148E-01   .2110454E-01
   .2137241E-01   .2211145E-01   .2335451E-01   .2476412E-01   .2557718E-01
   .2508047E-01   .2272492E-01   .1852414E-01   .1363056E-01   .9017588E-02
   .4980372E-02   .1154208E-02  -.3270895E-02  -.8776002E-02  -.1525967E-01
  -.2184264E-01  -.2689059E-01  -.2859656E-01  -.2548410E-01  -.1715446E-01
  -.4164503E-02   .1269743E-01   .3160405E-01   .4996960E-01   .6581464E-01
   .7834478E-01   .8808189E-01   .9647150E-01   .1049117E+00   .1145807E+00
   .1251014E+00   .1348501E+00   .1422557E+00   .1467512E+00   .1492997E+00
   .1513852E+00   .1539281E+00   .1569766E+00   .1599881E+00   .1624735E+00
   .1641636E+00   .1639752E+00   .1603023E+00   .1509882E+00   .1330808E+00
   .1036652E+00   .6032616E-01   .3927752E-02  -.5757091E-01  -.1106158E+00
  -.1446294E+00  -.1553735E+00  -.1450771E+00  -.1194497E+00  -.8564625E-01
  -.4958802E-01  -.1463649E-01   .1599931E-01   .3870959E-01   .5230894E-01
   .5778795E-01   .5673064E-01   .5028066E-01   .3880488E-01   .2259632E-01
   .2115168E-02  -.2199266E-01  -.4791024E-01  -.7294102E-01  -.9403347E-01
  -.1092220E+00  -.1188138E+00  -.1256252E+00  -.1332989E+00  -.1444401E+00
  -.1601163E+00  -.1799932E+00  -.2021139E+00  -.2240780E+00  -.2430235E+00
  -.2560951E+00  -.2623582E+00  -.2624454E+00  -.2574598E+00  -.2489915E+00
  -.2394708E+00  -.2304252E+00  -.2219739E+00  -.2127689E+00  -.2012776E+00
  -.1866162E+00  -.1687284E+00  -.1493482E+00  -.1302566E+00  -.1123396E+00
  -.9685103E-01  -.8425221E-01  -.7457508E-01  -.6755658E-01  -.6256285E-01
  -.5868827E-01  -.5448898E-01  -.4862792E-01  -.4087759E-01  -.3133890E-01
  -.2066494E-01  -.1011307E-01  -.1111202E-02   .5792393E-02   .1052227E-01
   .1329950E-01   .1506103E-01   .1684667E-01   .1898442E-01   .2138543E-01
   .2357081E-01   .2508270E-01   .2572762E-01   .2595725E-01   .2698656E-01
   .3047890E-01   .3751276E-01   .4827033E-01   .6220603E-01   .7711018E-01
   .9069127E-01   .1008832E+00   .1063863E+00   .1070853E+00   .1041895E+00
   .9956580E-01   .9501140E-01   .9169046E-01   .9004122E-01   .9039052E-01
   .9321957E-01   .9851591E-01   .1056627E+00   .1135108E+00   .1207732E+00
   .1269732E+00   .1317337E+00   .1343132E+00   .1343284E+00   .1316732E+00
   .1261935E+00   .1182193E+00   .1084657E+00   .9722112E-01   .8493808E-01
   .7231174E-01   .6061752E-01   .5064385E-01   .4207138E-01   .3477407E-01
   .2877502E-01   .2397262E-01   .1952478E-01   .1459173E-01   .8813252E-02
   .1795049E-02  -.6942829E-02  -.1768580E-01  -.2920178E-01  -.3921200E-01
  -.4620109E-01  -.4956190E-01  -.4920063E-01  -.4531662E-01  -.3771867E-01
  -.2640178E-01  -.1231219E-01   .3711000E-02   .2029789E-01   .3624472E-01
   .5041777E-01   .6216138E-01   .7183025E-01   .7976991E-01   .8598664E-01
   .9051690E-01   .9301364E-01   .9321947E-01   .9120594E-01   .8679893E-01
   .7994385E-01   .7056751E-01   .5868101E-01   .4505513E-01   .3000934E-01
   .1424679E-01  -.5588768E-03  -.1327628E-01  -.2390688E-01  -.3221619E-01
  -.3721437E-01  -.3845813E-01  -.3719025E-01  -.3432913E-01  -.2988652E-01
  -.2380808E-01  -.1616711E-01  -.7652382E-02   .5904399E-03   .7047820E-02
   .1058906E-01   .1104888E-01   .9116752E-02   .5740108E-02   .1720387E-02
  -.2359507E-02  -.6106734E-02  -.8783337E-02  -.1020480E-01  -.1061184E-01
  -.9795911E-02  -.7505144E-02  -.4229012E-02  -.6086429E-03   .2749636E-02
   .5203528E-02   .6351539E-02   .6213886E-02   .5446089E-02   .4556484E-02
   .3654629E-02   .3088650E-02   .3519217E-02   .4821701E-02   .6881290E-02
   .9104396E-02   .1003426E-01   .8038155E-02   .1977029E-02  -.8432892E-02
  -.2171472E-01  -.3595586E-01  -.4979405E-01  -.6318652E-01  -.7645754E-01
  -.8937330E-01  -.1009741E+00  -.1093119E+00  -.1126636E+00  -.1099707E+00
  -.1010195E+00  -.8712289E-01  -.7059255E-01  -.5326647E-01  -.3678610E-01
  -.2212459E-01  -.9663249E-02   .2991795E-04   .5896987E-02   .6824442E-02
   .1847573E-02  -.1060167E-01  -.3060291E-01  -.5619143E-01  -.8345055E-01
  -.1088321E+00  -.1298379E+00  -.1451973E+00  -.1546838E+00  -.1589421E+00
  -.1588994E+00  -.1552779E+00  -.1489192E+00  -.1408099E+00  -.1318527E+00
  -.1222345E+00  -.1125167E+00  -.1030489E+00  -.9378087E-01  -.8448288E-01
  -.7408150E-01  -.6126317E-01  -.4524125E-01  -.2586251E-01  -.3531946E-02
   .2078452E-01   .4474478E-01   .6469437E-01   .7838897E-01   .8542772E-01
   .8694445E-01   .8495331E-01   .8149939E-01   .7827516E-01   .7616842E-01
   .7507565E-01   .7458928E-01   .7437785E-01   .7424020E-01   .7419985E-01
   .7481677E-01   .7618527E-01   .7753170E-01   .7813744E-01   .7752202E-01
   .7498483E-01   .7034741E-01   .6387345E-01   .5613796E-01   .4797256E-01
   .4021868E-01   .3331026E-01   .2761615E-01   .2340673E-01   .2039058E-01
   .1814211E-01   .1606616E-01   .1386352E-01   .1110917E-01   .7424012E-02
   .2426339E-02  -.3982669E-02  -.1178826E-01  -.2029305E-01  -.2826600E-01
  -.3459534E-01  -.3850840E-01  -.4004245E-01  -.3954345E-01  -.3783492E-01
  -.3551968E-01  -.3272588E-01  -.2972442E-01  -.2681635E-01  -.2407883E-01
  -.2142380E-01  -.1883673E-01  -.1637189E-01  -.1358509E-01  -.1020446E-01
  -.6647276E-02  -.3528291E-02  -.1254975E-02   .1353902E-03   .6600603E-03
   .2769900E-03  -.8169128E-03  -.2213931E-02  -.3606573E-02  -.4897044E-02
  -.6152176E-02  -.7353550E-02  -.8320442E-02  -.9181322E-02  -.1013203E-01
  -.1114592E-01  -.1249813E-01  -.1415912E-01  -.1593547E-01  -.1784452E-01
  -.1982429E-01  -.2189486E-01  -.2396076E-01  -.2614103E-01  -.2853416E-01
  -.3100069E-01  -.3385694E-01  -.3749403E-01  -.4198436E-01  -.4687658E-01
  -.5162404E-01  -.5530857E-01  -.5717780E-01  -.5659869E-01  -.5299223E-01
  -.4636647E-01  -.3746502E-01  -.2756227E-01  -.1812166E-01  -.9475696E-02
  -.1058764E-02   .6905928E-02   .1438707E-01   .2140888E-01   .2881294E-01
   .3769611E-01   .4799443E-01   .5914524E-01   .7059400E-01   .8239176E-01
   .9450469E-01   .1053585E+00   .1134779E+00   .1184903E+00   .1205774E+00
   .1202656E+00   .1178389E+00   .1134116E+00   .1076501E+00   .1007868E+00
   .9257105E-01   .8338109E-01   .7371454E-01   .6454431E-01   .5657695E-01
   .4983623E-01   .4429257E-01   .4005378E-01   .3655221E-01   .3286098E-01
   .2872888E-01   .2383210E-01   .1804151E-01   .1162516E-01   .4660722E-02
  -.2454065E-02  -.9111748E-02  -.1479038E-01  -.1950835E-01  -.2325499E-01
  -.2627096E-01  -.2898806E-01  -.3171581E-01  -.3439950E-01  -.3665522E-01
  -.3819504E-01  -.3900345E-01  -.3903195E-01  -.3760521E-01  -.3459661E-01
  -.3003445E-01  -.2428313E-01  -.1805732E-01  -.1168455E-01  -.5170078E-02
   .1513215E-02   .8338052E-02   .1524301E-01   .2231536E-01   .2984271E-01
   .3786702E-01   .4603766E-01   .5404418E-01   .6170413E-01   .6795014E-01
   .7184858E-01   .7316380E-01   .7220601E-01   .6941916E-01   .6512573E-01
   .5927103E-01   .5223437E-01   .4418073E-01   .3512578E-01   .2555705E-01
   .1553133E-01   .5023612E-02  -.5675813E-02  -.1589480E-01  -.2524042E-01
  -.3388998E-01  -.4194041E-01  -.4958827E-01  -.5648573E-01  -.6204309E-01
  -.6679605E-01  -.7145394E-01  -.7611269E-01  -.8047433E-01  -.8412197E-01
  -.8674126E-01  -.8802467E-01  -.8791157E-01  -.8608506E-01  -.8203979E-01
  -.7579235E-01  -.6825938E-01  -.6025456E-01  -.5207117E-01  -.4364530E-01
  -.3529068E-01  -.2756614E-01  -.2100488E-01  -.1622766E-01  -.1335893E-01
  -.1249173E-01  -.1391145E-01  -.1761079E-01  -.2294855E-01  -.2907039E-01
  -.3524466E-01  -.4122579E-01  -.4648023E-01  -.5022731E-01  -.5244277E-01
  -.5324042E-01  -.5284734E-01  -.5186512E-01  -.5064206E-01  -.4856371E-01
  -.4528466E-01  -.4098846E-01  -.3579127E-01  -.2958149E-01  -.2242427E-01
  -.1451762E-01  -.5735060E-02   .3617367E-02   .1311114E-01   .2191003E-01
   .2964015E-01   .3598223E-01   .4079901E-01   .4416731E-01   .4632858E-01
   .4764603E-01   .4803343E-01   .4718466E-01   .4507948E-01   .4144196E-01
   .3629976E-01   .2988564E-01   .2245583E-01   .1440308E-01   .6014096E-02
  -.2641102E-02  -.1112059E-01  -.1888880E-01  -.2562173E-01  -.3102530E-01
  -.3508721E-01  -.3791605E-01  -.3988688E-01  -.4085585E-01  -.4032905E-01
  -.3795837E-01  -.3414504E-01  -.2943100E-01  -.2368640E-01  -.1655212E-01
  -.8022320E-02   .1159107E-02   .1015213E-01   .1908206E-01   .2786861E-01
   .3651341E-01   .4492276E-01   .5235073E-01   .5834935E-01   .6274228E-01
   .6533466E-01   .6614796E-01   .6539782E-01   .6330263E-01   .6006258E-01
   .5583081E-01   .5059506E-01   .4484307E-01   .3927874E-01   .3458710E-01
   .3122119E-01   .2933885E-01   .2899416E-01   .3022228E-01   .3257874E-01
   .3520840E-01   .3731834E-01   .3857775E-01   .3887500E-01   .3837245E-01
   .3772032E-01   .3744274E-01   .3785884E-01   .3907781E-01   .4063188E-01
   .4246784E-01   .4481783E-01   .4818459E-01   .5241585E-01   .5680830E-01
   .6048174E-01   .6289500E-01   .6397098E-01   .6339066E-01   .6098951E-01
   .5646135E-01   .4980489E-01   .4144862E-01   .3152380E-01   .2048208E-01
   .8888969E-02  -.2543068E-02  -.1315782E-01  -.2268240E-01  -.3063863E-01
  -.3630857E-01  -.3967637E-01  -.4114878E-01  -.4139016E-01  -.4088542E-01
  -.3982587E-01  -.3813016E-01  -.3578831E-01  -.3292214E-01  -.2952059E-01
  -.2554194E-01  -.2079456E-01  -.1516876E-01  -.9088814E-02  -.2938292E-02
   .3450162E-02   .9845567E-02   .1584478E-01   .2129642E-01   .2588120E-01
   .2898011E-01   .3023934E-01   .2975652E-01   .2781918E-01   .2473530E-01
   .2103318E-01   .1725261E-01   .1317058E-01   .8332212E-02   .2580421E-02
  -.3709743E-02  -.1045273E-01  -.1797927E-01  -.2605143E-01  -.3429920E-01
  -.4195274E-01  -.4877920E-01  -.5499334E-01  -.6035511E-01  -.6451150E-01
  -.6751315E-01  -.6960606E-01  -.7105192E-01  -.7189847E-01  -.7202936E-01
  -.7122625E-01  -.6976116E-01  -.6750784E-01  -.6423578E-01  -.6003422E-01
  -.5540650E-01  -.5020304E-01  -.4425528E-01  -.3784673E-01  -.3107311E-01
  -.2434375E-01  -.1802864E-01  -.1265268E-01  -.8523538E-02  -.5383214E-02
  -.3506243E-02  -.3333684E-02  -.4963192E-02  -.8168207E-02  -.1242615E-01
  -.1692980E-01  -.2099774E-01  -.2410919E-01  -.2599471E-01  -.2670893E-01
  -.2659612E-01  -.2599927E-01  -.2521057E-01  -.2427686E-01  -.2334744E-01
  -.2169110E-01  -.1880864E-01  -.1433229E-01  -.8020547E-02   .1428981E-03
   .9831250E-02   .2069673E-01   .3199563E-01   .4298300E-01   .5316321E-01
   .6205733E-01   .6866451E-01   .7248017E-01   .7354282E-01   .7228955E-01
   .6928497E-01   .6470487E-01   .5889736E-01   .5209857E-01   .4460335E-01
   .3641428E-01   .2771918E-01   .1829627E-01   .7871408E-02  -.3452269E-02
  -.1592029E-01  -.2925631E-01  -.4302017E-01  -.5611967E-01  -.6751640E-01
  -.7686540E-01  -.8378668E-01  -.8798166E-01  -.8950508E-01  -.8887063E-01
  -.8653388E-01  -.8247633E-01  -.7651494E-01  -.6843821E-01  -.5852295E-01
  -.4750913E-01  -.3567278E-01  -.2264233E-01  -.9014030E-02   .4522997E-02
   .1734520E-01   .2909718E-01   .3973702E-01   .4916955E-01   .5752290E-01
   .6458942E-01   .6989957E-01   .7359679E-01   .7567888E-01   .7603723E-01
   .7511771E-01   .7380074E-01   .7267059E-01   .7130664E-01   .6913534E-01
   .6598586E-01   .6199810E-01   .5700306E-01   .5121317E-01   .4516464E-01
   .3971675E-01   .3506264E-01   .3069257E-01   .2634173E-01   .2187405E-01
   .1730069E-01   .1309325E-01   .9660268E-02   .7384552E-02   .5766711E-02
   .4320306E-02   .2962709E-02   .1882949E-02   .9372489E-03   .3061347E-03
   .5317962E-03   .1290484E-02   .2199370E-02   .3143447E-02   .3426829E-02
   .2808791E-02   .1631646E-02  -.9901236E-04  -.2104083E-02  -.3816661E-02
  -.5219366E-02  -.6261455E-02  -.7047359E-02  -.7372515E-02  -.6895359E-02
  -.5559970E-02  -.3441105E-02  -.9689619E-03   .1325668E-02   .3214815E-02
   .4607293E-02   .5842381E-02   .6750124E-02   .6883310E-02   .5858696E-02
   .3942430E-02   .1481836E-02  -.1350676E-02  -.4672299E-02  -.8469083E-02
  -.1238298E-01  -.1590120E-01  -.1883020E-01  -.2112344E-01  -.2258580E-01
  -.2344285E-01  -.2400669E-01  -.2446833E-01  -.2441385E-01  -.2374495E-01
  -.2285356E-01  -.2202573E-01  -.2153791E-01  -.2158829E-01  -.2246458E-01
  -.2420057E-01  -.2636952E-01  -.2889177E-01  -.3187699E-01  -.3501717E-01
  -.3794832E-01  -.4033623E-01  -.4166069E-01  -.4165203E-01  -.4016287E-01
  -.3717260E-01  -.3239293E-01  -.2610533E-01  -.1898029E-01  -.1170417E-01
  -.5234978E-02  -.1228536E-03   .3790178E-02   .6914217E-02   .9590632E-02
   .1197253E-01   .1451497E-01   .1760807E-01   .2123074E-01   .2530860E-01
   .2916301E-01   .3232560E-01   .3475900E-01   .3638600E-01   .3687400E-01
   .3611825E-01   .3472840E-01   .3318697E-01   .3215206E-01   .3183169E-01
   .3168661E-01   .3098829E-01   .3001716E-01   .2934294E-01   .2930759E-01
   .3005762E-01   .3137227E-01   .3289084E-01   .3448486E-01   .3626309E-01
   .3819929E-01   .4043590E-01   .4308714E-01   .4624435E-01   .4989885E-01
   .5378728E-01   .5725823E-01   .5953222E-01   .6002335E-01   .5876395E-01
   .5599401E-01   .5202222E-01   .4693634E-01   .4091313E-01   .3374182E-01
   .2560603E-01   .1719756E-01   .9197007E-02   .1559155E-02  -.5942497E-02
  -.1314405E-01  -.2036709E-01  -.2806191E-01  -.3623550E-01  -.4453032E-01
  -.5227929E-01  -.5904950E-01  -.6502747E-01  -.7024330E-01  -.7456838E-01
  -.7767497E-01  -.7949692E-01  -.8006337E-01  -.7929341E-01  -.7766971E-01
  -.7581083E-01  -.7369326E-01  -.7076977E-01  -.6673140E-01  -.6216553E-01
  -.5807456E-01  -.5508650E-01  -.5343704E-01  -.5229447E-01  -.5068318E-01
  -.4879827E-01  -.4679067E-01  -.4441416E-01  -.4132030E-01  -.3709570E-01
  -.3154018E-01  -.2496367E-01  -.1798124E-01  -.1113208E-01  -.4836757E-02
   .7445236E-03   .5336599E-02   .9102933E-02   .1233070E-01   .1493372E-01
   .1683927E-01   .1822526E-01   .1916663E-01   .1989191E-01   .2049216E-01
   .2084602E-01   .2095058E-01   .2093269E-01   .2089445E-01   .2087602E-01
   .2088268E-01   .2090273E-01   .2091314E-01   .2091779E-01   .2095456E-01
   .2131804E-01   .2249735E-01   .2465539E-01   .2745166E-01   .3039072E-01
   .3314658E-01   .3550515E-01   .3756572E-01   .3961489E-01   .4114018E-01
   .4140661E-01   .4062802E-01   .3914485E-01   .3680296E-01   .3363398E-01
   .2951488E-01   .2431210E-01   .1830997E-01   .1209922E-01   .6518362E-02
   .2191469E-02  -.8531177E-03  -.2730571E-02  -.3550257E-02  -.3722082E-02
  -.3717924E-02  -.3761961E-02  -.3870207E-02  -.3977652E-02  -.4115621E-02
  -.4771744E-02  -.6372184E-02  -.8325441E-02  -.9988186E-02  -.1125951E-01
  -.1194463E-01  -.1210002E-01  -.1202459E-01  -.1198346E-01  -.1200820E-01
  -.1167915E-01  -.1073599E-01  -.9715912E-02  -.8765512E-02  -.7734082E-02
  -.6969426E-02  -.6675947E-02  -.6722025E-02  -.6903467E-02  -.7445865E-02
  -.8890575E-02  -.1127357E-01  -.1416566E-01  -.1711011E-01  -.1990401E-01
  -.2275345E-01  -.2585848E-01  -.2882769E-01  -.3134126E-01  -.3362142E-01
  -.3558266E-01  -.3676271E-01  -.3710445E-01  -.3694818E-01  -.3636516E-01
  -.3532236E-01  -.3400649E-01  -.3220851E-01  -.3003143E-01  -.2778086E-01
  -.2540363E-01  -.2264672E-01  -.1935747E-01  -.1584428E-01  -.1257971E-01
  -.9855230E-02  -.7698863E-02  -.5646176E-02  -.3612058E-02  -.2481696E-02
  -.3035573E-02  -.4991722E-02  -.7968429E-02  -.1172042E-01  -.1557818E-01
  -.1913997E-01  -.2196045E-01  -.2377734E-01  -.2505085E-01  -.2586969E-01
  -.2625894E-01  -.2620289E-01  -.2541477E-01  -.2377583E-01  -.2166491E-01
  -.1927548E-01  -.1653831E-01  -.1309797E-01  -.8762596E-02  -.3736797E-02
   .1900867E-02   .7918544E-02   .1428803E-01   .2111775E-01   .2858110E-01
   .3659110E-01   .4472707E-01   .5239273E-01   .5934065E-01   .6572906E-01
   .7208262E-01   .7815288E-01   .8354120E-01   .8772897E-01   .9042062E-01
   .9188443E-01   .9252060E-01   .9261122E-01   .9225910E-01   .9159547E-01
   .9042488E-01   .8872520E-01   .8651519E-01   .8371999E-01   .8013648E-01
   .7609579E-01   .7183930E-01   .6769608E-01   .6360986E-01   .5960307E-01
   .5550159E-01   .5137892E-01   .4709351E-01   .4264858E-01   .3815309E-01
   .3349408E-01   .2853060E-01   .2273856E-01   .1620993E-01   .9208644E-02
   .2325469E-02  -.4027107E-02  -.9366418E-02  -.1337574E-01  -.1632105E-01
  -.1885911E-01  -.2150763E-01  -.2437565E-01  -.2733243E-01  -.3023068E-01
  -.3300761E-01  -.3569248E-01  -.3815920E-01  -.3984091E-01  -.4046794E-01
  -.4030083E-01  -.3957444E-01  -.3844481E-01  -.3674005E-01  -.3403170E-01
  -.3010725E-01  -.2571699E-01  -.2162941E-01  -.1821160E-01  -.1551836E-01
  -.1380485E-01  -.1319692E-01  -.1359477E-01  -.1464469E-01  -.1573330E-01
  -.1683853E-01  -.1781742E-01  -.1837256E-01  -.1843391E-01  -.1797384E-01
  -.1739663E-01  -.1749457E-01  -.1885479E-01  -.2142810E-01  -.2493259E-01
  -.2927897E-01  -.3419329E-01  -.3876752E-01  -.4231872E-01  -.4493056E-01
  -.4685353E-01  -.4804634E-01  -.4842394E-01  -.4778379E-01  -.4663343E-01
  -.4571318E-01  -.4484431E-01  -.4400066E-01  -.4353228E-01  -.4385738E-01
  -.4522116E-01  -.4724429E-01  -.4945509E-01  -.5173854E-01  -.5415120E-01
  -.5612121E-01  -.5704868E-01  -.5681396E-01  -.5564797E-01  -.5378917E-01
  -.5111650E-01  -.4729587E-01  -.4210243E-01  -.3579350E-01  -.2919049E-01
  -.2306443E-01  -.1761787E-01  -.1281344E-01  -.8809174E-02  -.5906153E-02
  -.4338957E-02  -.4121875E-02  -.4691453E-02  -.5227882E-02  -.5290779E-02
  -.4694074E-02  -.3227398E-02  -.8556541E-03   .2463931E-02   .6270950E-02
   .9891610E-02   .1314684E-01   .1561308E-01   .1686121E-01   .1730218E-01
   .1782713E-01   .1893470E-01   .2057258E-01   .2276224E-01   .2582109E-01
   .2986949E-01   .3480255E-01   .4024646E-01   .4578113E-01   .5099057E-01
   .5539886E-01   .5880530E-01   .6154009E-01   .6408109E-01   .6651111E-01
   .6836504E-01   .6926741E-01   .6935318E-01   .6883633E-01   .6774978E-01
   .6645574E-01   .6507828E-01   .6380125E-01   .6250528E-01   .6121785E-01
   .5967527E-01   .5778628E-01   .5547786E-01   .5266030E-01   .4904416E-01
   .4442890E-01   .3906627E-01   .3343896E-01   .2791066E-01   .2267556E-01
   .1781294E-01   .1325703E-01   .9178842E-02   .5505786E-02   .2232040E-02
  -.6994618E-03  -.3430605E-02  -.5978497E-02  -.8116391E-02  -.9955835E-02
  -.1196122E-01  -.1410884E-01  -.1596169E-01  -.1749350E-01  -.1846588E-01
  -.1879617E-01  -.1871402E-01  -.1836877E-01  -.1752942E-01  -.1633352E-01
  -.1491662E-01  -.1376473E-01  -.1325508E-01  -.1347712E-01  -.1461851E-01
  -.1645840E-01  -.1874828E-01  -.2154285E-01  -.2527550E-01  -.3009087E-01
  -.3557722E-01  -.4102913E-01  -.4560449E-01  -.4901278E-01  -.5096493E-01
  -.5146305E-01  -.5086925E-01  -.4968049E-01  -.4824208E-01  -.4643101E-01
  -.4414819E-01  -.4161886E-01  -.3936350E-01  -.3744999E-01  -.3608007E-01
  -.3545654E-01  -.3538290E-01  -.3538044E-01  -.3471542E-01  -.3335733E-01
  -.3108837E-01  -.2746357E-01  -.2271499E-01  -.1690428E-01  -.1042571E-01
  -.3592502E-02   .3161962E-02   .9675677E-02   .1605197E-01   .2183492E-01
   .2640571E-01   .2997733E-01   .3292662E-01   .3498093E-01   .3579126E-01
   .3500726E-01   .3252892E-01   .2902929E-01   .2491399E-01   .2047835E-01
   .1584448E-01   .1128181E-01   .7306746E-02   .4199736E-02   .2095723E-02
   .1302077E-02   .1613505E-02   .2862092E-02   .4951841E-02   .7547519E-02
   .1028774E-01   .1298995E-01   .1564789E-01   .1822115E-01   .2045698E-01
   .2206918E-01   .2266286E-01   .2230356E-01   .2109540E-01   .1935255E-01
   .1740310E-01   .1549354E-01   .1365955E-01   .1211808E-01   .1126431E-01
   .1107842E-01   .1110696E-01   .1061811E-01   .9417171E-02   .7673349E-02
   .5198840E-02   .2110993E-02  -.1066110E-02  -.3935893E-02  -.6221733E-02
  -.7616675E-02  -.8106710E-02  -.8072623E-02  -.7950787E-02  -.7960604E-02
  -.8088015E-02  -.8225098E-02  -.8283596E-02  -.8273532E-02  -.8313293E-02
  -.8852978E-02  -.9865400E-02  -.1043581E-01  -.9980354E-02  -.8870343E-02
  -.7670380E-02  -.6501186E-02  -.5081300E-02  -.3303953E-02  -.1254718E-02
   .8739124E-03   .2921263E-02   .4575731E-02   .5367131E-02   .5090966E-02
   .3669706E-02   .1338133E-02  -.1433324E-02  -.4275954E-02  -.7227318E-02
  -.1034671E-01  -.1342529E-01  -.1632954E-01  -.1907621E-01  -.2169376E-01
  -.2384152E-01  -.2547398E-01  -.2667735E-01  -.2708927E-01  -.2674573E-01
  -.2595795E-01  -.2483860E-01  -.2331261E-01  -.2145328E-01  -.1943023E-01
  -.1764064E-01  -.1621611E-01  -.1503330E-01  -.1425524E-01  -.1352830E-01
  -.1211900E-01  -.1017739E-01  -.8329411E-02  -.6822802E-02  -.6054418E-02
  -.6371020E-02  -.7804982E-02  -.9713691E-02  -.1165851E-01  -.1376515E-01
  -.1616742E-01  -.1882585E-01  -.2155495E-01  -.2390686E-01  -.2559329E-01
  -.2681298E-01  -.2731995E-01  -.2690106E-01  -.2592507E-01  -.2494320E-01
  -.2397670E-01  -.2270202E-01  -.2092499E-01  -.1877723E-01  -.1611647E-01
  -.1275629E-01  -.8985779E-02  -.5266496E-02  -.1555623E-02   .2494723E-02
   .7095206E-02   .1244706E-01   .1885301E-01   .2595297E-01   .3334269E-01
   .4082300E-01   .4825326E-01   .5543848E-01   .6189921E-01   .6733064E-01
   .7117651E-01   .7275788E-01   .7199566E-01   .6902455E-01   .6431952E-01
   .5880688E-01   .5280554E-01   .4645592E-01   .4024652E-01   .3473857E-01
   .3012572E-01   .2669113E-01   .2425549E-01   .2211878E-01   .2010800E-01
   .1869591E-01   .1774029E-01   .1678309E-01   .1600334E-01   .1556029E-01
   .1505176E-01   .1408051E-01   .1289199E-01   .1164060E-01   .1034252E-01
   .9013450E-02   .7486040E-02   .5835242E-02   .4510014E-02   .3659680E-02
   .3445129E-02   .3883810E-02   .4776969E-02   .6049703E-02   .7388832E-02
   .8700306E-02   .9303717E-02   .8526732E-02   .6611655E-02   .3761959E-02
  -.2351123E-03  -.5404591E-02  -.1140700E-01  -.1765969E-01  -.2386470E-01
  -.2973203E-01  -.3479139E-01  -.3842826E-01  -.4099960E-01  -.4327620E-01
  -.4549969E-01  -.4708683E-01  -.4744629E-01  -.4647781E-01  -.4488400E-01
  -.4308262E-01  -.4139216E-01  -.3979958E-01  -.3790653E-01  -.3548928E-01
  -.3269405E-01  -.2979343E-01  -.2713651E-01  -.2505029E-01  -.2337808E-01
  -.2167509E-01  -.1975206E-01  -.1742932E-01  -.1459549E-01  -.1142428E-01
  -.8382759E-02  -.5564483E-02  -.3261227E-02  -.1601193E-02  -.4979527E-03
  -.9538670E-04  -.5642028E-03  -.1835088E-02  -.3837900E-02  -.6715448E-02
  -.1029649E-01  -.1380938E-01  -.1652210E-01  -.1831838E-01  -.1892257E-01
  -.1835693E-01  -.1711983E-01  -.1502612E-01  -.1185586E-01  -.7791945E-02
  -.3021727E-02   .2227372E-02   .7579128E-02   .1263215E-01   .1749477E-01
   .2233347E-01   .2687227E-01   .3124537E-01   .3538598E-01   .3875283E-01
   .4124760E-01   .4308824E-01   .4464639E-01   .4629984E-01   .4771749E-01
   .4847702E-01   .4861307E-01   .4856283E-01   .4871663E-01   .4878936E-01
   .4842847E-01   .4727086E-01   .4530988E-01   .4252017E-01   .3908488E-01
   .3522352E-01   .3085866E-01   .2620401E-01   .2210702E-01   .1889745E-01
   .1613728E-01   .1399249E-01   .1288386E-01   .1270926E-01   .1326046E-01
   .1432880E-01   .1570434E-01   .1741857E-01   .1932364E-01   .2123531E-01
   .2237670E-01   .2216585E-01   .2103082E-01   .1908682E-01   .1644858E-01
   .1355222E-01   .1072556E-01   .8048075E-02   .5422651E-02   .2732484E-02
  -.2996336E-04  -.2823470E-02  -.5609783E-02  -.8389876E-02  -.1108748E-01
  -.1348051E-01  -.1568038E-01  -.1791792E-01  -.1982011E-01  -.2139950E-01
  -.2257575E-01  -.2316817E-01  -.2341135E-01  -.2418688E-01  -.2608456E-01
  -.2893678E-01  -.3249921E-01  -.3669547E-01  -.4079975E-01  -.4390789E-01
  -.4598723E-01  -.4718424E-01  -.4765601E-01  -.4766907E-01  -.4725155E-01
  -.4624238E-01  -.4427687E-01  -.4177394E-01  -.3948552E-01  -.3745159E-01
  -.3522734E-01  -.3236002E-01  -.2897415E-01  -.2533918E-01  -.2185511E-01
  -.1884566E-01  -.1600457E-01  -.1277097E-01  -.9199844E-02  -.5780250E-02
  -.2730120E-02   .2384469E-03   .3278734E-02   .5807211E-02   .7550243E-02
   .8410203E-02   .8155015E-02   .6978915E-02   .5140857E-02   .2813031E-02
   .2133951E-03  -.2433512E-02  -.4741773E-02  -.6179696E-02  -.6352714E-02
  -.5392720E-02  -.3845672E-02  -.2018233E-02   .1235248E-03   .2597683E-02
   .5252515E-02   .7656629E-02   .9273115E-02   .1009220E-01   .1026312E-01
   .9971310E-02   .9564614E-02   .8899958E-02   .7967064E-02   .7276865E-02
   .7323942E-02   .8227624E-02   .9699478E-02   .1152053E-01   .1348391E-01
   .1548317E-01   .1752016E-01   .1986782E-01   .2270916E-01   .2577622E-01
   .2871580E-01   .3120770E-01   .3328034E-01   .3511156E-01   .3646304E-01
   .3711496E-01   .3722924E-01   .3703798E-01   .3633069E-01   .3497017E-01
   .3325804E-01   .3137008E-01   .2945355E-01   .2774281E-01   .2634492E-01
   .2540690E-01   .2507286E-01   .2561858E-01   .2685195E-01   .2845861E-01
   .3044184E-01   .3250021E-01   .3420856E-01   .3554030E-01   .3648785E-01
   .3674712E-01   .3591001E-01   .3390380E-01   .3115719E-01   .2822671E-01
   .2534799E-01   .2253130E-01   .1978227E-01   .1705948E-01   .1432396E-01
   .1155578E-01   .8760382E-02   .5966146E-02   .3196505E-02   .4233646E-03
  -.2611672E-02  -.6147654E-02  -.9860083E-02  -.1327347E-01  -.1646940E-01
  -.1961244E-01  -.2256349E-01  -.2486105E-01  -.2646538E-01  -.2761174E-01
  -.2825622E-01  -.2850310E-01  -.2859117E-01  -.2894435E-01  -.2979760E-01
  -.3085773E-01  -.3183974E-01  -.3276406E-01  -.3325616E-01  -.3283746E-01
  -.3157041E-01  -.2963011E-01  -.2691549E-01  -.2336919E-01  -.1907131E-01
  -.1436873E-01  -.9838855E-02  -.5964077E-02  -.2899828E-02  -.5503962E-03
   .1465639E-02   .3466848E-02   .5640590E-02   .8134799E-02   .1084964E-01
   .1340818E-01   .1564333E-01   .1765003E-01   .1974904E-01   .2211043E-01
   .2431992E-01   .2626348E-01   .2811250E-01   .2982780E-01   .3139441E-01
   .3305494E-01   .3517173E-01   .3784498E-01   .4117881E-01   .4510647E-01
   .4930401E-01   .5372727E-01   .5835274E-01   .6326625E-01   .6814097E-01
   .7258669E-01   .7665842E-01   .8017992E-01   .8316179E-01   .8565953E-01
   .8762189E-01   .8917227E-01   .9073587E-01   .9242409E-01   .9408180E-01
   .9599828E-01   .9815371E-01   .1001583E+00   .1018195E+00   .1033561E+00
   .1048613E+00   .1059013E+00   .1062935E+00   .1062313E+00   .1058436E+00
   .1050392E+00   .1038254E+00   .1021924E+00   .1000379E+00   .9741508E-01
   .9437345E-01   .9081774E-01   .8681872E-01   .8245573E-01   .7780109E-01
   .7326001E-01   .6942237E-01   .6665214E-01   .6486573E-01   .6408412E-01
   .6440727E-01   .6620573E-01   .6946047E-01   .7376630E-01   .7855197E-01
   .8313079E-01   .8702948E-01   .8992492E-01   .9160594E-01   .9190382E-01
   .9037676E-01   .8646484E-01   .7996236E-01   .7043923E-01   .5759875E-01
   .4179673E-01   .2387465E-01   .4182104E-02  -.1644604E-01  -.3666549E-01
  -.5527934E-01  -.7119647E-01  -.8444021E-01  -.9559848E-01  -.1056956E+00
  -.1159330E+00  -.1267013E+00  -.1381170E+00  -.1498605E+00  -.1613505E+00
  -.1720565E+00  -.1815555E+00  -.1893514E+00  -.1947841E+00  -.1978942E+00
  -.1992406E+00  -.1996067E+00  -.1996178E+00  -.1994494E+00  -.1991323E+00
  -.1986427E+00  -.1981197E+00  -.1982420E+00  -.1991731E+00  -.2004392E+00
  -.2017587E+00  -.2030541E+00  -.2043180E+00  -.2056644E+00  -.2073629E+00
  -.2096276E+00  -.2123010E+00  -.2148281E+00  -.2167753E+00  -.2182016E+00
  -.2193738E+00  -.2203786E+00  -.2212951E+00  -.2221081E+00  -.2229393E+00
  -.2241215E+00  -.2262233E+00  -.2292079E+00  -.2324436E+00  -.2353957E+00
  -.2376571E+00  -.2392275E+00  -.2404578E+00  -.2416695E+00  -.2426988E+00
  -.2432724E+00  -.2433497E+00  -.2428419E+00  -.2417418E+00  -.2400779E+00
  -.2383311E+00  -.2363297E+00  -.2337135E+00  -.2303312E+00  -.2259308E+00
  -.2201742E+00  -.2123908E+00  -.2023816E+00  -.1903620E+00  -.1761640E+00
  -.1585565E+00  -.1362446E+00  -.1092478E+00  -.7814768E-01  -.4497108E-01
  -.1273398E-01   .1607107E-01   .4011494E-01   .5995680E-01   .7726721E-01
   .9328505E-01   .1086496E+00   .1233679E+00   .1373948E+00   .1512809E+00
   .1655512E+00   .1810215E+00   .1985395E+00   .2181726E+00   .2390317E+00
   .2589615E+00   .2763878E+00   .2906192E+00   .3013746E+00   .3085654E+00
   .3116541E+00   .3104533E+00   .3056704E+00   .2982090E+00   .2889607E+00
   .2786194E+00   .2676070E+00   .2562335E+00   .2447855E+00   .2338164E+00
   .2237008E+00   .2145963E+00   .2058490E+00   .1962475E+00   .1851141E+00
   .1719633E+00   .1568079E+00   .1395644E+00   .1204888E+00   .1010422E+00
   .8281768E-01   .6704355E-01   .5477714E-01   .4696826E-01   .4365623E-01
   .4351931E-01   .4462614E-01   .4636091E-01   .4915708E-01   .5269570E-01
   .5612079E-01   .5893015E-01   .6064530E-01   .6121379E-01   .6112255E-01
   .6091184E-01   .6096142E-01   .6149391E-01   .6235708E-01   .6374433E-01
   .6619321E-01   .6975205E-01   .7393907E-01   .7814963E-01   .8175774E-01
   .8424002E-01   .8526477E-01   .8469226E-01   .8326924E-01   .8157762E-01
   .7979595E-01   .7744201E-01   .7377740E-01   .6868862E-01   .6244589E-01
   .5519233E-01   .4689332E-01   .3772658E-01   .2819470E-01   .1910203E-01
   .1142947E-01   .5733864E-02   .1907501E-02  -.4363399E-03  -.1581527E-02
  -.1656577E-02  -.1107315E-02  -.6206398E-04   .1166144E-02   .2627277E-02
   .4572540E-02   .6757728E-02   .8960998E-02   .1084969E-01   .1165132E-01
   .1100270E-01   .9071045E-02   .6397840E-02   .3611673E-02   .1261609E-02
  -.7443152E-03  -.2893339E-02  -.5484299E-02  -.8681297E-02  -.1233831E-01
  -.1682223E-01  -.2233643E-01  -.2904715E-01  -.3715542E-01  -.4644426E-01
  -.5644161E-01  -.6575495E-01  -.7306393E-01  -.7822018E-01  -.8201681E-01
  -.8520875E-01  -.8823650E-01  -.9125890E-01  -.9426031E-01  -.9718081E-01
  -.9998361E-01  -.1027022E+00  -.1053783E+00  -.1078565E+00  -.1097823E+00
  -.1113963E+00  -.1129638E+00  -.1141941E+00  -.1143139E+00  -.1133714E+00
  -.1115874E+00  -.1092882E+00  -.1070135E+00  -.1048348E+00  -.1026321E+00
  -.1005108E+00  -.9852977E-01  -.9699729E-01  -.9599637E-01  -.9548332E-01
  -.9535344E-01  -.9538567E-01  -.9530420E-01  -.9483193E-01  -.9396303E-01
  -.9233109E-01  -.8930471E-01  -.8431332E-01  -.7736112E-01  -.6910965E-01
  -.6012625E-01  -.5028503E-01  -.3972734E-01  -.2836277E-01  -.1660564E-01
  -.5414113E-02   .4701056E-02   .1371711E-01   .2158546E-01   .2836889E-01
   .3447436E-01   .3972491E-01   .4396249E-01   .4698703E-01   .4861906E-01
   .4931522E-01   .4937569E-01   .4904525E-01   .4843863E-01   .4747572E-01
   .4627551E-01   .4525039E-01   .4452137E-01   .4434727E-01   .4471240E-01
   .4542917E-01   .4616654E-01   .4685443E-01   .4744753E-01   .4807214E-01
   .4864551E-01   .4892840E-01   .4864726E-01   .4795538E-01   .4710796E-01
   .4640894E-01   .4609401E-01   .4601056E-01   .4542945E-01   .4439233E-01
   .4354355E-01   .4320862E-01   .4328700E-01   .4347561E-01   .4355441E-01
   .4348136E-01   .4334958E-01   .4319520E-01   .4274399E-01   .4177786E-01
   .4034370E-01   .3842001E-01   .3599911E-01   .3319297E-01   .2988931E-01
   .2568677E-01   .2028161E-01   .1405075E-01   .7227338E-02   .2053588E-04
  -.7466269E-02  -.1506161E-01  -.2297183E-01  -.3103185E-01  -.3896480E-01
  -.4644535E-01  -.5275412E-01  -.5758618E-01  -.6106541E-01  -.6297832E-01
  -.6281441E-01  -.6052878E-01  -.5693404E-01  -.5237346E-01  -.4699722E-01
  -.4099906E-01  -.3450591E-01  -.2774056E-01  -.2098303E-01  -.1459137E-01
  -.8765642E-02  -.3381659E-02   .1478774E-02   .5486441E-02   .8355340E-02
   .1039942E-01   .1177170E-01   .1243032E-01   .1259175E-01   .1248972E-01
   .1198698E-01   .1064901E-01   .8376142E-02   .5455914E-02   .2011507E-02
  -.2245322E-02  -.7580794E-02  -.1367517E-01  -.2012900E-01  -.2668262E-01
  -.3290600E-01  -.3826456E-01  -.4267144E-01  -.4616601E-01  -.4863258E-01
  -.4990629E-01  -.4991027E-01  -.4890498E-01  -.4733798E-01  -.4505218E-01
  -.4175097E-01  -.3741637E-01  -.3255019E-01  -.2745956E-01  -.2186817E-01
  -.1559287E-01  -.8794960E-02  -.1732229E-02   .5631187E-02   .1335216E-01
   .2103172E-01   .2811632E-01   .3479807E-01   .4155116E-01   .4818382E-01
   .5409718E-01   .5918791E-01   .6355470E-01   .6739501E-01   .7116425E-01
   .7510747E-01   .7902662E-01   .8277683E-01   .8653269E-01   .9040357E-01
   .9416181E-01   .9748622E-01   .1003129E+00   .1026454E+00   .1046978E+00
   .1066610E+00   .1084372E+00   .1099343E+00   .1109481E+00   .1110874E+00
   .1103306E+00   .1092361E+00   .1082446E+00   .1072890E+00   .1061612E+00
   .1045673E+00   .1023347E+00   .9984051E-01   .9723817E-01   .9460521E-01
   .9184373E-01   .8851259E-01   .8426937E-01   .7912477E-01   .7326583E-01
   .6709524E-01   .6088266E-01   .5472838E-01   .4837250E-01   .4171797E-01
   .3469150E-01   .2685232E-01   .1823503E-01   .9445094E-02   .8942997E-03
  -.7505423E-02  -.1550151E-01  -.2293764E-01  -.3008680E-01  -.3705475E-01
  -.4367855E-01  -.4970663E-01  -.5493152E-01  -.5918952E-01  -.6274291E-01
  -.6601009E-01  -.6912230E-01  -.7208346E-01  -.7489199E-01  -.7733266E-01
  -.7924973E-01  -.8099650E-01  -.8308825E-01  -.8558326E-01  -.8785342E-01
  -.8938240E-01  -.9037117E-01  -.9103038E-01  -.9138784E-01  -.9152239E-01
  -.9157275E-01  -.9157494E-01  -.9129959E-01  -.9052600E-01  -.8949826E-01
  -.8829625E-01  -.8701103E-01  -.8588665E-01  -.8487288E-01  -.8405671E-01
  -.8352816E-01  -.8283106E-01  -.8168002E-01  -.7990876E-01  -.7756509E-01
  -.7505979E-01  -.7253997E-01  -.7002350E-01  -.6770897E-01  -.6579710E-01
  -.6404942E-01  -.6223920E-01  -.6044768E-01  -.5861596E-01  -.5688272E-01
  -.5496293E-01  -.5216179E-01  -.4837266E-01  -.4405790E-01  -.3976491E-01
  -.3588858E-01  -.3217557E-01  -.2815487E-01  -.2385129E-01  -.1948801E-01
  -.1527395E-01  -.1152983E-01  -.8634688E-02  -.6445220E-02  -.4553817E-02
  -.2604083E-02  -.4877239E-03   .1769402E-02   .4265093E-02   .7207483E-02
   .1053679E-01   .1407792E-01   .1785510E-01   .2185431E-01   .2599710E-01
   .3025626E-01   .3459767E-01   .3908364E-01   .4358068E-01   .4790429E-01
   .5242506E-01   .5702242E-01   .6100803E-01   .6397666E-01   .6607858E-01
   .6782023E-01   .6924798E-01   .7009399E-01   .7036910E-01   .7032997E-01
   .7023463E-01   .7018243E-01   .6982643E-01   .6889616E-01   .6768968E-01
   .6619743E-01   .6418337E-01   .6166661E-01   .5887056E-01   .5603573E-01
   .5327373E-01   .5057248E-01   .4791901E-01   .4546695E-01   .4343047E-01
   .4147345E-01   .3911536E-01   .3635179E-01   .3301461E-01   .2933859E-01
   .2591362E-01   .2296292E-01   .2034756E-01   .1778260E-01   .1510459E-01
   .1228080E-01   .9387209E-02   .6347990E-02   .3068313E-02  -.3858158E-03
  -.4081960E-02  -.8013998E-02  -.1188371E-01  -.1528603E-01  -.1816941E-01
  -.2076270E-01  -.2312949E-01  -.2511699E-01  -.2669410E-01  -.2782749E-01
  -.2841121E-01  -.2857657E-01  -.2875977E-01  -.2944966E-01  -.3048922E-01
  -.3129433E-01  -.3158208E-01  -.3148221E-01  -.3128081E-01  -.3118309E-01
  -.3122146E-01  -.3131331E-01  -.3135747E-01  -.3113584E-01  -.3039978E-01
  -.2939481E-01  -.2865825E-01  -.2843124E-01  -.2855359E-01  -.2874090E-01
  -.2885316E-01  -.2907618E-01  -.2972427E-01  -.3071203E-01  -.3187977E-01
  -.3321835E-01  -.3459562E-01  -.3615992E-01  -.3782720E-01  -.3960916E-01
  -.4156439E-01  -.4361017E-01  -.4571331E-01  -.4775754E-01  -.4956480E-01
  -.5083832E-01  -.5162590E-01  -.5196615E-01  -.5183535E-01  -.5129352E-01
  -.5036153E-01  -.4886073E-01  -.4669033E-01  -.4360717E-01  -.3956897E-01
  -.3504102E-01  -.3074861E-01  -.2669651E-01  -.2255479E-01  -.1791270E-01
  -.1280903E-01  -.7808804E-02  -.3276761E-02   .8100386E-03   .4557560E-02
   .7906696E-02   .1086144E-01   .1329948E-01   .1501599E-01   .1605415E-01
   .1604588E-01   .1544121E-01   .1491342E-01   .1463082E-01   .1419462E-01
   .1343654E-01   .1272240E-01   .1235367E-01   .1233578E-01   .1262781E-01
   .1338395E-01   .1472755E-01   .1663956E-01   .1891448E-01   .2168101E-01
   .2485574E-01   .2828129E-01   .3156238E-01   .3434218E-01   .3640935E-01
   .3788351E-01   .3897853E-01   .3965071E-01   .3992962E-01   .3995334E-01
   .3969708E-01   .3873748E-01   .3705528E-01   .3480248E-01   .3216981E-01
   .2941748E-01   .2670303E-01   .2403600E-01   .2137468E-01   .1867357E-01
   .1604516E-01   .1380104E-01   .1208765E-01   .1074155E-01   .9616238E-02
   .8851551E-02   .8609863E-02   .8960260E-02   .9524516E-02   .9888000E-02
   .1004993E-01   .1043720E-01   .1123696E-01   .1206680E-01   .1251931E-01
   .1257691E-01   .1243468E-01   .1231331E-01   .1228627E-01   .1222548E-01
   .1175674E-01   .1080591E-01   .9745576E-02   .8702957E-02   .7605252E-02
   .6371965E-02   .5018096E-02   .3601677E-02   .2193107E-02   .9346250E-03
   .8012096E-05  -.7127534E-03  -.1237050E-02  -.1480225E-02  -.1463934E-02
  -.1084487E-02  -.4767393E-03   .2369285E-03   .8458925E-03   .1256984E-02
   .1971237E-02   .2958055E-02   .3759761E-02   .4450189E-02   .5295547E-02
   .6148310E-02   .7005021E-02   .8091321E-02   .9645433E-02   .1118896E-01
   .1218335E-01   .1302104E-01   .1386749E-01   .1442758E-01   .1461175E-01
   .1455631E-01   .1440237E-01   .1397281E-01   .1306180E-01   .1174928E-01
   .1031785E-01   .9154389E-02   .8032024E-02   .6943656E-02   .5912648E-02
   .4773317E-02   .3461042E-02   .2087595E-02   .9889250E-03   .1313710E-03
  -.7792622E-03  -.1648215E-02  -.2447318E-02  -.3067742E-02  -.3315761E-02
  -.2967248E-02  -.2017342E-02  -.7560808E-03   .3606701E-03   .1200020E-02
   .2050719E-02   .3144648E-02   .4438913E-02   .5552213E-02   .6122424E-02
   .6186196E-02   .6029437E-02   .5869592E-02   .5510724E-02   .4423305E-02
   .2345637E-02  -.4207239E-03  -.3386958E-02  -.6227104E-02  -.8972542E-02
  -.1214018E-01  -.1583679E-01  -.1944835E-01  -.2235059E-01  -.2456260E-01
  -.2657594E-01  -.2840713E-01  -.3003699E-01  -.3142028E-01  -.3223489E-01
  -.3245831E-01  -.3244563E-01  -.3289913E-01  -.3389416E-01  -.3452689E-01
  -.3415806E-01  -.3316329E-01  -.3229436E-01  -.3167294E-01  -.3094714E-01
  -.2988118E-01  -.2852637E-01  -.2704060E-01  -.2552772E-01  -.2383079E-01
  -.2195730E-01  -.2018553E-01  -.1867554E-01  -.1739858E-01  -.1640976E-01
  -.1559817E-01  -.1468610E-01  -.1374847E-01  -.1285123E-01  -.1188822E-01
  -.1098203E-01  -.1043005E-01  -.1029215E-01  -.1036735E-01  -.1026095E-01
  -.9914140E-02  -.9425393E-02  -.8609619E-02  -.7840603E-02  -.7213618E-02
  -.6260528E-02  -.4702035E-02  -.2839745E-02  -.8954077E-03   .1225714E-02
   .3274802E-02   .4990540E-02   .6794354E-02   .8847621E-02   .1085053E-01
   .1253215E-01   .1393290E-01   .1537980E-01   .1698082E-01   .1855939E-01
   .2019668E-01   .2161003E-01   .2260439E-01   .2347232E-01   .2433107E-01
   .2494216E-01   .2518597E-01   .2513498E-01   .2478236E-01   .2400496E-01
   .2301132E-01   .2210042E-01   .2117450E-01   .2027808E-01   .1966700E-01
   .1923201E-01   .1854247E-01   .1763031E-01   .1692693E-01   .1663829E-01
   .1666619E-01   .1678992E-01   .1685257E-01   .1682526E-01   .1675179E-01
   .1666984E-01   .1633006E-01   .1537753E-01   .1416974E-01   .1292818E-01
   .1168588E-01   .1042437E-01   .9089420E-02   .7533447E-02   .5644766E-02
   .3715577E-02   .2052802E-02   .8301217E-03   .4894162E-04  -.6993738E-03
  -.1626825E-02  -.2426497E-02  -.2835495E-02  -.2900896E-02  -.2958351E-02
  -.3371899E-02  -.4086858E-02  -.4932190E-02  -.5564900E-02  -.5802295E-02
  -.5748379E-02  -.5618317E-02  -.5561903E-02  -.5597734E-02  -.5684974E-02
  -.5767080E-02  -.5815392E-02  -.5813753E-02  -.5789354E-02  -.5640215E-02
  -.5200172E-02  -.4699806E-02  -.4408279E-02  -.4268014E-02  -.3959086E-02
  -.3512028E-02  -.3177585E-02  -.2962815E-02  -.2585964E-02  -.2004197E-02
  -.1256223E-02  -.6073958E-03  -.3055577E-03  -.3272616E-03  -.4768998E-03
  -.5727115E-03  -.5662293E-03  -.4988543E-03  -.4365892E-03  -.4365778E-03
  -.6704402E-03  -.1507039E-02  -.2568050E-02  -.3250224E-02  -.3412378E-02
  -.3468357E-02  -.4121802E-02  -.5174618E-02  -.6182527E-02  -.7293666E-02
  -.8380439E-02  -.9398751E-02  -.1040846E-01  -.1127679E-01  -.1214458E-01
  -.1311247E-01  -.1388777E-01  -.1424604E-01  -.1428397E-01  -.1420829E-01
  -.1415841E-01  -.1408932E-01  -.1375373E-01  -.1319735E-01  -.1249099E-01
  -.1179185E-01  -.1104238E-01  -.1009396E-01  -.9188622E-02  -.8334692E-02
  -.7314157E-02  -.6071173E-02  -.4739554E-02  -.3729107E-02  -.3242306E-02
  -.2866160E-02  -.2147964E-02  -.1283290E-02  -.6455640E-03  -.7559628E-04
   .8105861E-03   .2303703E-02   .3866960E-02   .4786365E-02   .5000163E-02
   .5101825E-02   .5392301E-02   .5677260E-02   .5547381E-02   .5056883E-02
   .4604812E-02   .4373343E-02   .4077251E-02   .3315623E-02   .2049866E-02
   .5237185E-03  -.9879192E-03  -.2367661E-02  -.3662438E-02  -.4965161E-02
  -.6332921E-02  -.7748754E-02  -.9164442E-02  -.1050981E-01  -.1162658E-01
  -.1271730E-01  -.1389860E-01  -.1503562E-01  -.1616389E-01  -.1711387E-01
  -.1767125E-01  -.1809015E-01  -.1879257E-01  -.1971844E-01  -.2069341E-01
  -.2174405E-01  -.2266250E-01  -.2316354E-01  -.2325215E-01  -.2312077E-01
  -.2280793E-01  -.2228025E-01  -.2162327E-01  -.2072448E-01  -.1953204E-01
  -.1811378E-01  -.1645321E-01  -.1455802E-01  -.1271983E-01  -.1114069E-01
  -.9777937E-02  -.8520760E-02  -.7412709E-02  -.6349183E-02  -.5152377E-02
  -.4219118E-02  -.3806734E-02  -.3771641E-02  -.3671414E-02  -.3028535E-02
  -.1971523E-02  -.9277313E-03  -.6300899E-04   .7649661E-03   .2131510E-02
   .4315432E-02   .7093433E-02   .1003475E-01   .1285485E-01   .1552067E-01
   .1813447E-01   .2078318E-01   .2336136E-01   .2566052E-01   .2761691E-01
   .2899590E-01   .3000999E-01   .3092123E-01   .3175334E-01   .3272053E-01
   .3394990E-01   .3536321E-01   .3666462E-01   .3757022E-01   .3819594E-01
   .3856909E-01   .3870747E-01   .3868611E-01   .3851399E-01   .3809901E-01
   .3763724E-01   .3735734E-01   .3728192E-01   .3720807E-01   .3675688E-01
   .3585597E-01   .3486893E-01   .3389543E-01   .3292287E-01   .3220115E-01
   .3189870E-01   .3189913E-01   .3197045E-01   .3197470E-01   .3190157E-01
   .3170977E-01   .3116306E-01   .3013917E-01   .2876431E-01   .2729092E-01
   .2588287E-01   .2456984E-01   .2317418E-01   .2143360E-01   .1951848E-01
   .1766430E-01   .1578204E-01   .1394546E-01   .1229097E-01   .1084806E-01
   .9536390E-02   .8232401E-02   .6870473E-02   .5562159E-02   .4569452E-02
   .3737344E-02   .2843943E-02   .2090189E-02   .1697052E-02   .1636195E-02
   .1711292E-02   .1649074E-02   .1031081E-02  -.3350268E-03  -.1860712E-02
  -.3163679E-02  -.4516566E-02  -.5803881E-02  -.6928508E-02  -.8125268E-02
  -.9747002E-02  -.1167671E-01  -.1349471E-01  -.1501404E-01  -.1637397E-01
  -.1793679E-01  -.1946851E-01  -.2074435E-01  -.2185298E-01  -.2266784E-01
  -.2304022E-01  -.2301207E-01  -.2250033E-01  -.2153133E-01  -.2054044E-01
  -.1972825E-01  -.1914156E-01  -.1857521E-01  -.1796033E-01  -.1718031E-01
  -.1615523E-01  -.1518165E-01  -.1429921E-01  -.1337086E-01  -.1258767E-01
  -.1217922E-01  -.1205297E-01  -.1171839E-01  -.1088632E-01  -.9944167E-02
  -.9374053E-02  -.9268830E-02  -.9403304E-02  -.9538822E-02  -.9577454E-02
  -.9532292E-02  -.9462547E-02  -.9418365E-02  -.9376807E-02  -.9103725E-02
  -.8540726E-02  -.7750312E-02  -.6660287E-02  -.5117672E-02  -.3217133E-02
  -.1371854E-02   .1341169E-03   .1149160E-02   .1824439E-02   .2400600E-02
   .3039038E-02   .3756255E-02   .4517030E-02   .5266924E-02   .5982021E-02
   .6662849E-02   .7341412E-02   .7981380E-02   .8433896E-02   .8853465E-02
   .9349417E-02   .9737041E-02   .9909974E-02   .9903215E-02   .9797834E-02
   .9465772E-02   .8899594E-02   .8186209E-02   .7492315E-02   .7040971E-02
   .6628392E-02   .5903960E-02   .5030402E-02   .4426176E-02   .4237846E-02
   .4274009E-02   .4065046E-02   .3298897E-02   .2297830E-02   .1598615E-02
   .1336378E-02   .1107801E-02   .4625871E-03  -.4309609E-03  -.1090684E-02
  -.1310560E-02  -.1223748E-02  -.1067963E-02  -.1003997E-02  -.1048109E-02
  -.1175145E-02  -.1549080E-02  -.2353896E-02  -.3331219E-02  -.4226006E-02
  -.4941822E-02  -.5556109E-02  -.6129093E-02  -.6532315E-02  -.6885958E-02
  -.7372323E-02  -.7853804E-02  -.8313947E-02  -.8836062E-02  -.9250585E-02
  -.9441806E-02  -.9429073E-02  -.9349601E-02  -.9323620E-02  -.9564125E-02
  -.1014952E-01  -.1091268E-01  -.1168147E-01  -.1216135E-01  -.1227952E-01
  -.1218202E-01  -.1207809E-01  -.1203461E-01  -.1186497E-01  -.1141563E-01
  -.1092592E-01  -.1045674E-01  -.9926367E-02  -.9514527E-02  -.9333047E-02
  -.9127769E-02  -.8490746E-02  -.7536750E-02  -.6775944E-02  -.6283220E-02
  -.5840785E-02  -.5283843E-02  -.4374404E-02  -.3128625E-02  -.1926958E-02
  -.1239178E-02  -.1114368E-02  -.1278783E-02  -.1444011E-02  -.1466688E-02
  -.1182093E-02  -.5586091E-03   .2084975E-03   .9411900E-03   .1374486E-02
   .1463583E-02   .1352563E-02   .1232489E-02   .1162676E-02   .9423267E-03
   .2734535E-03  -.6984617E-03  -.1456456E-02  -.1768492E-02  -.1945423E-02
  -.2519196E-02  -.3451047E-02  -.4227852E-02  -.4564263E-02  -.4556694E-02
  -.4431422E-02  -.4362036E-02  -.4366290E-02  -.4235464E-02  -.3815876E-02
  -.3366661E-02  -.3136810E-02  -.3163338E-02  -.3485873E-02  -.4075893E-02
  -.4577812E-02  -.4792706E-02  -.4763360E-02  -.4654675E-02  -.4592897E-02
  -.4611490E-02  -.4672882E-02  -.4722706E-02  -.4737386E-02  -.4729245E-02
  -.4718115E-02  -.4716852E-02  -.4713037E-02  -.4558272E-02  -.3960088E-02
  -.3002550E-02  -.2203837E-02  -.1707680E-02  -.1122449E-02  -.1410702E-03
   .1077246E-02   .2130782E-02   .2933311E-02   .3382782E-02   .3500969E-02
   .3476421E-02   .3617090E-02   .4261403E-02   .5292920E-02   .6268175E-02
   .7069002E-02   .7829098E-02   .8904145E-02   .1008297E-01   .1128790E-01
   .1254302E-01   .1370931E-01   .1460491E-01   .1546396E-01   .1638904E-01
   .1710951E-01   .1757395E-01   .1801834E-01   .1823442E-01   .1795354E-01
   .1744339E-01   .1694728E-01   .1640824E-01   .1582180E-01   .1514128E-01
   .1442718E-01   .1355392E-01   .1254929E-01   .1164321E-01   .1071372E-01
   .9587505E-02   .8253574E-02   .6818503E-02   .5386606E-02   .4012197E-02
   .2692620E-02   .1510600E-02   .7486678E-03   .3318353E-03  -.2349504E-03
  -.1134489E-02  -.2124024E-02  -.3176032E-02  -.4208391E-02  -.4912784E-02
  -.5326128E-02  -.5903450E-02  -.6943756E-02  -.8346576E-02  -.9702889E-02
  -.1067693E-01  -.1149422E-01  -.1234569E-01  -.1301702E-01  -.1334976E-01
  -.1341510E-01  -.1339554E-01  -.1356019E-01  -.1410332E-01  -.1473183E-01
  -.1510051E-01  -.1515178E-01  -.1502310E-01  -.1472320E-01  -.1403505E-01
  -.1289321E-01  -.1147309E-01  -.1001250E-01  -.8627763E-02  -.7320143E-02
  -.6032611E-02  -.4848856E-02  -.3952600E-02  -.3261782E-02  -.2668471E-02
  -.1883112E-02  -.9207627E-03  -.1935018E-03   .1037548E-03   .2257702E-03
   .6992160E-03   .1599931E-02   .2432864E-02   .2843036E-02   .2984785E-02
   .3265941E-02   .3796039E-02   .4542329E-02   .5177309E-02   .5611152E-02
   .6170183E-02   .6951908E-02   .7620147E-02   .7933067E-02   .7922178E-02
   .7635784E-02   .7057885E-02   .6356864E-02   .5610056E-02   .5072781E-02
   .4858348E-02   .4719823E-02   .4187420E-02   .3252398E-02   .2440109E-02
   .2072783E-02   .1922273E-02   .1433821E-02   .5101846E-03  -.3605393E-03
  -.8133475E-03  -.8649573E-03  -.7484374E-03  -.6785716E-03  -.7219728E-03
  -.8297664E-03  -.9202985E-03  -.9416929E-03  -.7534135E-03  -.9041772E-04
   .9378374E-03   .1780249E-02   .2273052E-02   .2836379E-02   .3671791E-02
   .4569411E-02   .5405324E-02   .6100127E-02   .6774327E-02   .7586043E-02
   .8759066E-02   .9842942E-02   .1041335E-01   .1048891E-01   .1033675E-01
   .1019497E-01   .1015058E-01   .1002668E-01   .9439179E-02   .8310343E-02
   .6853180E-02   .5334325E-02   .3764534E-02   .1987695E-02   .1862659E-03
  -.1599609E-02  -.3663753E-02  -.6003750E-02  -.8216475E-02  -.1016109E-01
  -.1204237E-01  -.1367501E-01  -.1492673E-01  -.1610300E-01  -.1699961E-01
  -.1739264E-01  -.1723395E-01  -.1648076E-01  -.1539424E-01  -.1428588E-01
  -.1311096E-01  -.1222064E-01  -.1168942E-01  -.1096865E-01  -.9699346E-02
  -.8301682E-02  -.6883894E-02  -.5366583E-02  -.4079015E-02  -.3013958E-02
  -.1933152E-02  -.7142293E-03   .4668773E-03   .1189144E-02   .1212511E-02
   .4956497E-03  -.4333817E-03  -.6120022E-03   .1319915E-03   .1090987E-02
   .1639130E-02   .1687421E-02   .1628945E-02   .1921171E-02   .2584112E-02
   .3489324E-02   .4363330E-02   .5145906E-02   .5797544E-02   .6430423E-02
   .7051246E-02   .7872147E-02   .8865547E-02   .9606247E-02   .9867108E-02
   .9779876E-02   .9451387E-02   .8724805E-02   .7573583E-02   .6183043E-02
   .4887517E-02   .3846613E-02   .2746530E-02   .1684955E-02   .7355058E-03
  -.1642509E-04  -.6556267E-03  -.9548418E-03  -.6964102E-03  -.2259143E-03
   .8321160E-04   .2782866E-03   .6492713E-03   .1231029E-02   .1994235E-02
   .2776082E-02   .3688617E-02   .4962085E-02   .6613182E-02   .8241233E-02
   .9869030E-02   .1131848E-01   .1234540E-01   .1319884E-01   .1406933E-01
   .1478061E-01   .1530473E-01   .1598955E-01   .1691231E-01   .1767707E-01
   .1788872E-01   .1757704E-01   .1725916E-01   .1696925E-01   .1678480E-01
   .1689592E-01   .1741606E-01   .1797685E-01   .1821412E-01   .1797595E-01
   .1729441E-01   .1658531E-01   .1619171E-01   .1626182E-01   .1678090E-01
   .1732217E-01   .1754938E-01   .1745834E-01   .1724632E-01   .1710273E-01
   .1735305E-01   .1827343E-01   .1930001E-01   .1986118E-01   .1990430E-01
   .1983805E-01   .2010806E-01   .2044214E-01   .2048768E-01   .2039256E-01
   .2008287E-01   .1972036E-01   .1952948E-01   .1956671E-01   .1976090E-01
   .2003149E-01   .2034963E-01   .2072881E-01   .2111466E-01   .2143030E-01
   .2162317E-01   .2157807E-01   .2110891E-01   .2032138E-01   .1935244E-01
   .1850531E-01   .1780498E-01   .1678413E-01   .1554396E-01   .1427287E-01
   .1300024E-01   .1170320E-01   .1023867E-01   .8416480E-02   .6575818E-02
   .5025926E-02   .3641882E-02   .2141278E-02   .5316965E-03  -.1150601E-02
  -.2972207E-02  -.4902403E-02  -.6952075E-02  -.8811207E-02  -.1040854E-01
  -.1214761E-01  -.1423947E-01  -.1642028E-01  -.1853753E-01  -.2039597E-01
  -.2190620E-01  -.2329112E-01  -.2484354E-01  -.2621242E-01  -.2708511E-01
  -.2778943E-01  -.2865454E-01  -.2947320E-01  -.2994576E-01  -.3007670E-01
  -.3006645E-01  -.3010208E-01  -.3025514E-01  -.3045584E-01  -.3043348E-01
  -.2974102E-01  -.2872800E-01  -.2804304E-01  -.2789746E-01  -.2807210E-01
  -.2807502E-01  -.2734341E-01  -.2614205E-01  -.2486913E-01  -.2366255E-01
  -.2250288E-01  -.2142086E-01  -.2058361E-01  -.1980134E-01  -.1878280E-01
  -.1747850E-01  -.1613141E-01  -.1500450E-01  -.1385933E-01  -.1274631E-01
  -.1156759E-01  -.1000650E-01  -.8280693E-02  -.6942298E-02  -.5983673E-02
  -.5148468E-02  -.4432849E-02  -.3662151E-02  -.2726232E-02  -.1760164E-02
  -.6353868E-03   .3588493E-03   .8802218E-03   .1042678E-02   .1222226E-02
   .1264107E-02   .1108119E-02   .8179021E-03   .2178687E-03  -.7015385E-03
  -.1533598E-02  -.1971465E-02  -.2044669E-02  -.1954990E-02  -.1901960E-02
  -.1942118E-02  -.2022673E-02  -.1994786E-02  -.1514450E-02  -.5432595E-03
   .4180936E-03   .1048577E-02   .1651713E-02   .2505790E-02   .3353463E-02
   .3883117E-02   .4149028E-02   .4519730E-02   .5113054E-02   .6028145E-02
   .7281629E-02   .8734554E-02   .1030498E-01   .1212139E-01   .1402880E-01
   .1584331E-01   .1762812E-01   .1911842E-01   .2029981E-01   .2143599E-01
   .2260526E-01   .2347796E-01   .2374962E-01   .2321183E-01   .2220377E-01
   .2161822E-01   .2168056E-01   .2200457E-01   .2219846E-01   .2215680E-01
   .2210815E-01   .2236508E-01   .2275652E-01   .2285777E-01   .2228580E-01
   .2120080E-01   .2025533E-01   .1971006E-01   .1918183E-01   .1844295E-01
   .1749905E-01   .1612784E-01   .1449993E-01   .1291709E-01   .1139413E-01
   .9718388E-02   .7876608E-02   .5874670E-02   .3847358E-02   .1785680E-02
  -.2432848E-03  -.2281485E-02  -.4159087E-02  -.5768134E-02  -.7164767E-02
  -.8327795E-02  -.9060746E-02  -.9340918E-02  -.9373777E-02  -.9494666E-02
  -.9965232E-02  -.1056271E-01  -.1108903E-01  -.1161875E-01  -.1201490E-01
  -.1218425E-01  -.1231968E-01  -.1273279E-01  -.1338758E-01  -.1418061E-01
  -.1478655E-01  -.1502720E-01  -.1499760E-01  -.1490316E-01  -.1488998E-01
  -.1511124E-01  -.1580891E-01  -.1685460E-01  -.1771116E-01  -.1820802E-01
  -.1876122E-01  -.1956769E-01  -.2032540E-01  -.2102911E-01  -.2202901E-01
  -.2298682E-01  -.2350889E-01  -.2358188E-01  -.2345582E-01  -.2347256E-01
  -.2388000E-01  -.2440001E-01  -.2483242E-01  -.2523336E-01  -.2517476E-01
  -.2434220E-01  -.2344227E-01  -.2312511E-01  -.2295608E-01  -.2235384E-01
  -.2121752E-01  -.1980623E-01  -.1854964E-01  -.1771278E-01  -.1697192E-01
  -.1596690E-01  -.1448023E-01  -.1257758E-01  -.1088940E-01  -.9799182E-02
  -.8959164E-02  -.7917207E-02  -.6542606E-02  -.5152075E-02  -.4227688E-02
  -.3852417E-02  -.3611083E-02  -.2961982E-02  -.1954842E-02  -.1132870E-02
  -.7817078E-03  -.6203328E-03  -.1381741E-03   .6421412E-03   .1266136E-02
   .1483360E-02   .1374163E-02   .1164349E-02   .1017870E-02   .9342648E-03
   .6733641E-03   .9085383E-04  -.5197759E-03  -.9093640E-03  -.1069914E-02
  -.1111742E-02  -.9783411E-03  -.6245783E-03  -.3353661E-03  -.2268029E-03
  -.4372475E-04   .6137359E-03   .1593657E-02   .2341624E-02   .2625562E-02
   .2758356E-02   .3104585E-02   .3549146E-02   .4039130E-02   .4599801E-02
   .5036160E-02   .5404578E-02   .5841337E-02   .6032192E-02   .5919605E-02
   .5906905E-02   .5894643E-02   .5635821E-02   .5286564E-02   .4886027E-02
   .4357046E-02   .3744715E-02   .3088382E-02   .2634778E-02   .2487521E-02
   .2544160E-02   .2642503E-02   .2682470E-02   .2663402E-02   .2619570E-02
   .2603370E-02   .2644697E-02   .2699003E-02   .2516506E-02   .1790878E-02
   .5864196E-03  -.6723695E-03  -.1666328E-02  -.2548854E-02  -.3575896E-02
  -.4624185E-02  -.5356418E-02  -.5912146E-02  -.6694043E-02  -.7593023E-02
  -.8218127E-02  -.8433943E-02  -.8425985E-02  -.8620927E-02  -.9098786E-02
  -.9325601E-02  -.9013725E-02  -.8237833E-02  -.7129308E-02  -.6124864E-02
  -.5673620E-02  -.5995668E-02  -.6954642E-02  -.7720596E-02  -.7501937E-02
  -.6549747E-02  -.5634254E-02  -.5017794E-02  -.4596199E-02  -.4137202E-02
  -.3526745E-02  -.2739770E-02  -.1709905E-02  -.7260954E-03  -.9881992E-04
   .5565506E-03   .1465408E-02   .2282495E-02   .2988174E-02   .3825895E-02
   .4716695E-02   .5594369E-02   .6586734E-02   .7508303E-02   .8039994E-02
   .8161802E-02   .8078902E-02   .7989000E-02   .7933660E-02   .7634431E-02
   .6820284E-02   .5747375E-02   .4688332E-02   .3577327E-02   .2356798E-02
   .1243132E-02   .3391816E-03  -.4321192E-03  -.1391287E-02  -.2582664E-02
  -.3510091E-02  -.3920313E-02  -.3953963E-02  -.3838935E-02  -.3516937E-02
  -.2828611E-02  -.1991425E-02  -.1180025E-02  -.2510686E-03   .9163794E-03
   .2250186E-02   .3425763E-02   .4331862E-02   .5207424E-02   .6043868E-02
   .6602449E-02   .6817280E-02   .6828604E-02   .6807143E-02   .6795415E-02
   .6543957E-02   .5803826E-02   .4867479E-02   .4242170E-02   .4013594E-02
   .3578728E-02   .2694136E-02   .1829023E-02   .1169020E-02   .6612923E-03
   .1503440E-03  -.4414381E-03  -.1123083E-02  -.1830526E-02  -.2490115E-02
  -.2806209E-02  -.2385113E-02  -.1511278E-02  -.8129263E-03  -.5455144E-03
  -.3716230E-03   .8193022E-05   .6497227E-03   .1389852E-02   .1971291E-02
   .2670323E-02   .3594541E-02   .4313112E-02   .4580136E-02   .4498426E-02
   .4312587E-02   .4192387E-02   .4133972E-02   .3865543E-02   .3289085E-02
   .2497114E-02   .1706339E-02   .1261187E-02   .1460409E-02   .2344610E-02
   .3364833E-02   .3749832E-02   .3600661E-02   .3535313E-02   .3961069E-02
   .4982063E-02   .6146829E-02   .6883808E-02   .7070814E-02   .6951097E-02
   .6832178E-02   .6900245E-02   .7302723E-02   .7718182E-02   .7751580E-02
   .7527232E-02   .7323922E-02   .7296010E-02   .7401701E-02   .7508457E-02
   .7476193E-02   .6909015E-02   .5842212E-02   .4925053E-02   .4475721E-02
   .3998919E-02   .3188550E-02   .2427985E-02   .1942270E-02   .1295683E-02
   .3166839E-03  -.5352502E-03  -.9642346E-03  -.1025961E-02  -.9912928E-03
  -.1257297E-02  -.1902711E-02  -.2751808E-02  -.3544897E-02  -.4000573E-02
  -.4081596E-02  -.3959313E-02  -.3815370E-02  -.3751416E-02  -.3728426E-02
  -.3417605E-02  -.2571690E-02  -.1500673E-02  -.5471640E-03   .1638163E-03
   .7422629E-03   .1359480E-02   .2311910E-02   .3570342E-02   .4783344E-02
   .5880731E-02   .6719004E-02   .7116277E-02   .7138380E-02   .7008020E-02
   .6898592E-02   .6868479E-02   .6878710E-02   .6869316E-02   .6784166E-02
   .6421567E-02   .5778311E-02   .5000776E-02   .4293818E-02   .3902529E-02
   .3837297E-02   .3935070E-02   .4028382E-02   .4048626E-02   .4018999E-02
   .3995934E-02   .4007429E-02   .3977960E-02   .3465444E-02   .2464850E-02
   .1619557E-02   .1304934E-02   .1427386E-02   .1679305E-02   .1825429E-02
   .1772738E-02   .1353815E-02   .4780578E-03  -.4798220E-03  -.1054191E-02
  -.1169087E-02  -.1128015E-02  -.1605133E-02  -.2701081E-02  -.3734509E-02
  -.4240816E-02  -.4259251E-02  -.4096211E-02  -.4035076E-02  -.4337791E-02
  -.5198772E-02  -.6321515E-02  -.7118894E-02  -.7364106E-02  -.7198514E-02
  -.6583499E-02  -.5520193E-02  -.4617606E-02  -.4246806E-02  -.4305136E-02
  -.4482614E-02  -.4520341E-02  -.4185134E-02  -.3297220E-02  -.2179023E-02
  -.1411175E-02  -.1201278E-02  -.1324972E-02  -.1312123E-02  -.8847510E-03
  -.1551388E-03   .6420313E-03   .9559300E-03   .5562740E-03  -.2533719E-03
  -.1100822E-02  -.1589265E-02  -.1656581E-02  -.1512899E-02  -.1393903E-02
  -.1398601E-02  -.1494826E-02  -.1607280E-02  -.1677652E-02  -.1670714E-02
  -.1420789E-02  -.6737451E-03   .5540062E-03   .1998746E-02   .3276934E-02
   .4369812E-02   .5539138E-02   .6840821E-02   .8280621E-02   .9379625E-02
   .1007109E-01   .1079124E-01   .1166513E-01   .1237359E-01   .1271300E-01
   .1274756E-01   .1266326E-01   .1258372E-01   .1234969E-01   .1167380E-01
   .1073522E-01   .1003790E-01   .9801773E-02   .9884063E-02   .1002631E-01
   .1006605E-01   .9987375E-02   .9862574E-02   .9768956E-02   .9725817E-02
   .9695510E-02   .9643669E-02   .9592727E-02   .9570828E-02   .9569150E-02
   .9573889E-02   .9572626E-02   .9570631E-02   .9597048E-02   .9815951E-02
   .1046796E-01   .1144978E-01   .1226050E-01   .1260483E-01   .1258194E-01
   .1245264E-01   .1240948E-01   .1249396E-01   .1263677E-01   .1273155E-01
   .1246966E-01   .1153770E-01   .1049687E-01   .9921365E-02   .9743413E-02
   .9362429E-02   .8543006E-02   .7438308E-02   .6094171E-02   .5007652E-02
   .4225949E-02   .3138847E-02   .1617585E-02  -.9280811E-04  -.1868821E-02
  -.3775879E-02  -.5767465E-02  -.7983470E-02  -.1022392E-01  -.1205423E-01
  -.1355405E-01  -.1468568E-01  -.1568102E-01  -.1669900E-01  -.1776924E-01
  -.1908071E-01  -.2046577E-01  -.2188010E-01  -.2291796E-01  -.2361737E-01
  -.2449109E-01  -.2534803E-01  -.2585139E-01  -.2596236E-01  -.2587059E-01
  -.2577790E-01  -.2577603E-01  -.2584269E-01  -.2591452E-01  -.2592218E-01
  -.2559589E-01  -.2463733E-01  -.2360380E-01  -.2304951E-01  -.2278495E-01
  -.2218297E-01  -.2127154E-01  -.2019639E-01  -.1908544E-01  -.1811238E-01
  -.1704962E-01  -.1598033E-01  -.1491953E-01  -.1373907E-01  -.1241254E-01
  -.1110719E-01  -.1009457E-01  -.9216480E-02  -.8173028E-02  -.6860293E-02
  -.5454050E-02  -.4219232E-02  -.2958142E-02  -.1756365E-02  -.6351181E-03
   .4666858E-03   .1317008E-02   .1749272E-02   .1849207E-02   .1832303E-02
   .1849388E-02   .1933477E-02   .2031395E-02   .2090513E-02   .2091399E-02
   .2056316E-02   .2010746E-02   .1965856E-02   .1915085E-02   .1853438E-02
   .1784269E-02   .1704783E-02   .1618055E-02   .1530816E-02   .1444330E-02
   .1359339E-02   .1276062E-02   .1197864E-02   .1115304E-02   .1050109E-02
   .1016642E-02   .1002448E-02   .9851183E-03   .9036883E-03   .4670725E-03
  -.4535375E-03  -.1414152E-02  -.1945855E-02  -.2054275E-02  -.2227547E-02
  -.2618266E-02  -.2996054E-02  -.3198444E-02  -.3162536E-02  -.2723237E-02
  -.2084575E-02  -.1632152E-02  -.1501946E-02  -.1596671E-02  -.1725529E-02
  -.1702781E-02  -.1282172E-02  -.6032874E-03   .1177152E-03   .3291802E-03
  -.3215503E-03  -.1378091E-02  -.2454232E-02  -.3435552E-02  -.3921808E-02
  -.4090355E-02  -.4262595E-02  -.4458933E-02  -.4614186E-02  -.4692323E-02
  -.4723724E-02  -.4787643E-02  -.5137907E-02  -.5976237E-02  -.6986905E-02
  -.7668427E-02  -.7867718E-02  -.7766179E-02  -.7702480E-02  -.8248293E-02
  -.9393165E-02  -.1042687E-01  -.1090128E-01  -.1087372E-01  -.1066172E-01
  -.1054929E-01  -.1061347E-01  -.1076090E-01  -.1088753E-01  -.1090367E-01
  -.1061468E-01  -.1002835E-01  -.9291124E-02  -.8599006E-02  -.8198824E-02
  -.8075070E-02  -.7903000E-02  -.7742403E-02  -.7831598E-02  -.8053006E-02
  -.8231688E-02  -.8289143E-02  -.8261049E-02  -.8233926E-02  -.8257259E-02
  -.8312283E-02  -.8406387E-02  -.8745425E-02  -.9357195E-02  -.1009782E-01
  -.1073088E-01  -.1082300E-01  -.1036984E-01  -.9834329E-02  -.9524409E-02
  -.9271021E-02  -.8914535E-02  -.8598056E-02  -.8441297E-02  -.8453985E-02
  -.8554409E-02  -.8667226E-02  -.8754332E-02  -.8796475E-02  -.8814169E-02
  -.8850189E-02  -.8906330E-02  -.8959798E-02  -.8999804E-02  -.9035190E-02
  -.9056190E-02  -.8880330E-02  -.8393336E-02  -.7736261E-02  -.7030581E-02
  -.6368795E-02  -.5554479E-02  -.4651551E-02  -.4028115E-02  -.3819348E-02
  -.3892503E-02  -.4017035E-02  -.3871992E-02  -.3319912E-02  -.2538503E-02
  -.1728220E-02  -.1017292E-02  -.2126482E-03   .6690865E-03   .1488507E-02
   .2386670E-02   .3314971E-02   .4152473E-02   .5092926E-02   .6263193E-02
   .7609175E-02   .9011835E-02   .1039296E-01   .1174458E-01   .1308959E-01
   .1459938E-01   .1621012E-01   .1752864E-01   .1861409E-01   .1972637E-01
   .2101067E-01   .2223494E-01   .2298121E-01   .2317219E-01   .2307322E-01
   .2297717E-01   .2301085E-01   .2314117E-01   .2325768E-01   .2303292E-01
   .2213806E-01   .2109986E-01   .2050058E-01   .2029864E-01   .1993333E-01
   .1917995E-01   .1844926E-01   .1809150E-01   .1809852E-01   .1826216E-01
   .1837116E-01   .1821681E-01   .1754821E-01   .1651335E-01   .1566196E-01
   .1515768E-01   .1458682E-01   .1374188E-01   .1280790E-01   .1176580E-01
   .1057193E-01   .9386734E-02   .8457041E-02   .7709654E-02   .6937907E-02
   .5837038E-02   .4802002E-02   .4226331E-02   .3962690E-02   .3446198E-02
   .2537320E-02   .1692425E-02   .1238547E-02   .1162544E-02   .1254014E-02
   .1318594E-02   .1286378E-02   .1183553E-02   .9370220E-03   .4106547E-03
  -.2650310E-03  -.9862025E-03  -.1496666E-02  -.1676817E-02  -.1634121E-02
  -.1541964E-02  -.1512253E-02  -.1550001E-02  -.1610331E-02  -.1647828E-02
  -.1649582E-02  -.1631202E-02  -.1612617E-02  -.1606150E-02  -.1611307E-02
  -.1621262E-02  -.1635271E-02  -.1650386E-02  -.1667466E-02  -.1687007E-02
  -.1695863E-02  -.1596076E-02  -.1103552E-02  -.1929963E-03   .6750646E-03
   .1129302E-02   .1172662E-02   .1035336E-02   .9380846E-03   .9613119E-03
   .1067400E-02   .1179040E-02   .1248994E-02   .1275030E-02   .1281132E-02
   .1279059E-02   .1256255E-02   .1111754E-02   .5702414E-03  -.3720170E-03
  -.1326209E-02  -.2052803E-02  -.2389828E-02  -.2873261E-02  -.3580191E-02
  -.4249626E-02  -.4974071E-02  -.5860976E-02  -.6615708E-02  -.6973944E-02
  -.6981047E-02  -.6859305E-02  -.6778077E-02  -.6695804E-02  -.6441260E-02
  -.6156028E-02  -.5549203E-02  -.4766713E-02  -.4229189E-02  -.4083041E-02
  -.4174751E-02  -.4191352E-02  -.3803685E-02  -.3110571E-02  -.2220305E-02
  -.1144543E-02   .4355161E-04   .1037715E-02   .1855811E-02   .2755275E-02
   .3661059E-02   .4585045E-02   .5686557E-02   .6997445E-02   .8309162E-02
   .8911540E-02   .8419043E-02   .7491978E-02   .7226231E-02   .8078959E-02
   .9670602E-02   .1132953E-01   .1239606E-01   .1265941E-01   .1244301E-01
   .1224299E-01   .1259043E-01   .1360470E-01   .1470342E-01   .1530331E-01
   .1534536E-01   .1522679E-01   .1572289E-01   .1675785E-01   .1763219E-01
   .1796171E-01   .1784989E-01   .1762528E-01   .1752409E-01   .1760287E-01
   .1775185E-01   .1786809E-01   .1791777E-01   .1791150E-01   .1788552E-01
   .1786875E-01   .1787014E-01   .1787697E-01   .1787077E-01   .1779533E-01
   .1741955E-01   .1657213E-01   .1557965E-01   .1494796E-01   .1476835E-01
   .1456551E-01   .1386217E-01   .1281672E-01   .1172359E-01   .1062332E-01
   .9666874E-02   .8838120E-02   .7853092E-02   .6575597E-02   .5092054E-02
   .3571326E-02   .2125162E-02   .7528821E-03  -.5418214E-03  -.1589017E-02
  -.2407369E-02  -.3276516E-02  -.4138469E-02  -.4736290E-02  -.5240834E-02
  -.6002948E-02  -.6885220E-02  -.7472201E-02  -.7698177E-02  -.8149690E-02
  -.9064723E-02  -.9908498E-02  -.1027709E-01  -.1027150E-01  -.1035865E-01
  -.1072850E-01  -.1119095E-01  -.1171761E-01  -.1227091E-01  -.1266006E-01
  -.1301749E-01  -.1349149E-01  -.1413252E-01  -.1482575E-01  -.1526412E-01
  -.1535629E-01  -.1519630E-01  -.1476632E-01  -.1416826E-01  -.1355099E-01
  -.1293008E-01  -.1247748E-01  -.1208509E-01  -.1139436E-01  -.1043828E-01
  -.9484488E-02  -.8500131E-02  -.7571343E-02  -.7006953E-02  -.6874135E-02
  -.6956621E-02  -.6837109E-02  -.6144700E-02  -.5044876E-02  -.4159447E-02
  -.3847802E-02  -.3976260E-02  -.4223368E-02  -.4270177E-02  -.3867406E-02
  -.3169297E-02  -.2446106E-02  -.2114314E-02  -.1989018E-02  -.1871230E-02
  -.1754890E-02  -.1659037E-02  -.1424350E-02  -.7097873E-03  -.4817034E-04
   .1591147E-03   .2876802E-03   .5570366E-03   .8484729E-03   .1039450E-02
   .1168879E-02   .1536203E-02   .2127230E-02   .2874918E-02   .3561045E-02
   .3976370E-02   .4292972E-02   .4343656E-02   .4086743E-02   .3850608E-02
   .4055985E-02   .4618383E-02   .5066248E-02   .5020133E-02   .5051714E-02
   .5286790E-02   .5656715E-02   .5812464E-02   .5551576E-02   .4886021E-02
   .4152306E-02   .3734138E-02   .3685129E-02   .3813305E-02   .3858850E-02
   .3454048E-02   .2485961E-02   .1499282E-02   .1198256E-02   .1265747E-02
   .1009659E-02   .6319072E-03   .2761501E-03   .1522982E-03   .6774529E-04
  -.2228780E-03  -.8859302E-03  -.1921022E-02  -.2931155E-02  -.3772352E-02
  -.4467193E-02  -.5414501E-02  -.6513438E-02  -.7337429E-02  -.8018393E-02
  -.8875049E-02  -.9771574E-02  -.1055681E-01  -.1091226E-01  -.1103059E-01
  -.1125484E-01  -.1181974E-01  -.1258517E-01  -.1336653E-01  -.1369805E-01
  -.1346345E-01  -.1307977E-01  -.1289551E-01  -.1301856E-01  -.1355321E-01
  -.1420778E-01  -.1441163E-01  -.1429025E-01  -.1447838E-01  -.1485083E-01
  -.1501239E-01  -.1512224E-01  -.1508742E-01  -.1457812E-01  -.1379201E-01
  -.1321368E-01  -.1304634E-01  -.1311776E-01  -.1297587E-01  -.1244716E-01
  -.1164262E-01  -.1080667E-01  -.1006575E-01  -.9411498E-02  -.8687930E-02
  -.7481886E-02  -.5999099E-02  -.4859235E-02  -.3922404E-02  -.2898176E-02
  -.1595625E-02   .8290510E-04   .1858430E-02   .3461595E-02   .4803202E-02
   .5754348E-02   .6200829E-02   .6274153E-02   .6255828E-02   .6493030E-02
   .6884610E-02   .7462963E-02   .8290843E-02   .8960066E-02   .9226823E-02
   .9175639E-02   .9008963E-02   .8698278E-02   .8424837E-02   .8216735E-02
   .7707951E-02   .6974406E-02   .6372878E-02   .5877582E-02   .5361544E-02
   .4745324E-02   .4092297E-02   .3616638E-02   .3164323E-02   .2437875E-02
   .1602559E-02   .1014581E-02   .5803716E-03   .1108128E-03  -.5004603E-03
  -.1180136E-02  -.1652453E-02  -.1854684E-02  -.2105972E-02  -.2560633E-02
  -.2954996E-02  -.2894554E-02  -.2388176E-02  -.1874264E-02  -.1645531E-02
  -.1685997E-02  -.1825731E-02  -.1916372E-02  -.1921926E-02  -.1915037E-02
  -.2130111E-02  -.2423725E-02  -.2677649E-02  -.2963667E-02  -.3000560E-02
  -.2876564E-02  -.2711907E-02  -.2449647E-02  -.2216381E-02  -.2097525E-02
  -.1893217E-02  -.1246814E-02  -.2739281E-03   .6874134E-03   .1648208E-02
   .2548864E-02   .3164826E-02   .3769610E-02   .4566428E-02   .5239929E-02
   .5996039E-02   .7032528E-02   .8161747E-02   .9111691E-02   .9862927E-02
   .1046690E-01   .1106281E-01   .1169609E-01   .1240249E-01   .1310090E-01
   .1377328E-01   .1424840E-01   .1461009E-01   .1504182E-01   .1539350E-01
   .1538355E-01   .1511449E-01   .1506313E-01   .1508204E-01   .1485261E-01
   .1450761E-01   .1424859E-01   .1393272E-01   .1323123E-01   .1227343E-01
   .1155479E-01   .1127753E-01   .1111392E-01   .1051798E-01   .9374425E-02
   .8107210E-02   .7123202E-02   .6437013E-02   .5912565E-02   .5339484E-02
   .4678013E-02   .3945016E-02   .3403505E-02   .3002909E-02   .2498656E-02
   .1856287E-02   .1125913E-02   .5968962E-03   .3681988E-03   .1445321E-03
  -.4906194E-03  -.1462935E-02  -.2436903E-02  -.3264612E-02  -.3920665E-02
  -.4513503E-02  -.4926107E-02  -.5102454E-02  -.5121193E-02  -.5112176E-02
  -.5151768E-02  -.5225602E-02  -.5288719E-02  -.5313364E-02  -.5302548E-02
  -.5275281E-02  -.5249713E-02  -.5243566E-02  -.5240770E-02  -.5034749E-02
  -.4492730E-02  -.3764958E-02  -.3017793E-02  -.2538902E-02  -.2405317E-02
  -.2474231E-02  -.2560400E-02  -.2558651E-02  -.2366275E-02  -.2015635E-02
  -.1943539E-02  -.2183343E-02  -.2626922E-02  -.3267310E-02  -.3832612E-02
  -.4102542E-02  -.4105519E-02  -.4007965E-02  -.3953950E-02  -.3995181E-02
  -.4078750E-02  -.4275111E-02  -.4606236E-02  -.4679051E-02  -.4599068E-02
  -.4757370E-02  -.4810687E-02  -.4185403E-02  -.3257072E-02  -.2597004E-02
  -.2286908E-02  -.2113417E-02  -.2220116E-02  -.2612566E-02  -.3111046E-02
  -.3334906E-02  -.3349119E-02  -.3059244E-02  -.2675587E-02  -.2602124E-02
  -.3045841E-02  -.3651153E-02  -.4026463E-02  -.4084703E-02  -.3971407E-02
  -.3868418E-02  -.3861512E-02  -.3921042E-02  -.3972529E-02  -.3853354E-02
  -.3386105E-02  -.2853692E-02  -.2556057E-02  -.2400737E-02  -.2090530E-02
  -.1730965E-02  -.1488488E-02  -.1277985E-02  -.8701658E-03  -.4292828E-03
  -.1754434E-03  -.1203464E-03  -.2869807E-04   .3796633E-03   .9163387E-03
   .1291510E-02   .1572786E-02   .2015481E-02   .2508177E-02   .2834894E-02
   .2932492E-02   .2884067E-02   .2823199E-02   .2805589E-02   .2837693E-02
   .2895323E-02   .2931976E-02   .2944528E-02   .2922739E-02   .2875800E-02
   .2707238E-02   .2399366E-02   .2367650E-02   .2614738E-02   .2890566E-02
   .3028191E-02   .3034103E-02   .3121121E-02   .3518844E-02   .4009941E-02
   .4328233E-02   .4534996E-02   .4775759E-02   .4896584E-02   .5112376E-02
   .5388295E-02   .5573421E-02   .5645055E-02   .5635322E-02   .5477652E-02
   .5182860E-02   .5166662E-02   .5280330E-02   .5092340E-02   .4740120E-02
   .4779808E-02   .5491868E-02   .6123615E-02   .6270980E-02   .5940487E-02
   .5119548E-02   .4182119E-02   .3692887E-02   .3491034E-02   .3378920E-02
   .3147355E-02   .2620416E-02   .2183850E-02   .2150650E-02   .2122434E-02
   .1809524E-02   .1141977E-02   .4854378E-03   .1488323E-03   .1407633E-03
   .2804846E-03   .3677101E-03   .3359693E-03   .2258978E-03  -.2831830E-04
  -.5580891E-03  -.1121350E-02  -.1572911E-02  -.2057697E-02  -.2459582E-02
  -.2521070E-02  -.2119306E-02  -.1739417E-02  -.1894134E-02  -.2393221E-02
  -.2941840E-02  -.3404483E-02  -.3661276E-02  -.4177570E-02  -.4886702E-02
  -.5418380E-02  -.5716915E-02  -.6099903E-02  -.6586377E-02  -.7054987E-02
  -.7633147E-02  -.8198741E-02  -.8535153E-02  -.8752924E-02  -.9131601E-02
  -.9481847E-02  -.9394136E-02  -.9017041E-02  -.8700073E-02  -.8608717E-02
  -.8688655E-02  -.8815109E-02  -.8907013E-02  -.8941427E-02  -.9003967E-02
  -.9255283E-02  -.9367953E-02  -.9219308E-02  -.8999010E-02  -.8889003E-02
  -.8902333E-02  -.8860755E-02  -.8484165E-02  -.7930682E-02  -.7527778E-02
  -.7386385E-02  -.7315759E-02  -.6964408E-02  -.6431563E-02  -.6020073E-02
  -.5775408E-02  -.5519491E-02  -.5387473E-02  -.5205221E-02  -.4911572E-02
  -.4657005E-02  -.4471058E-02  -.4210389E-02  -.4071980E-02  -.3995971E-02
  -.4033022E-02  -.3939356E-02  -.3756581E-02  -.3785247E-02  -.3757492E-02
  -.3436332E-02  -.2668703E-02  -.1564541E-02  -.6207215E-03   .6810212E-05
   .8016238E-03   .1792738E-02   .2810767E-02   .3638682E-02   .4345626E-02
   .4996587E-02   .5789274E-02   .6879838E-02   .8208069E-02   .9419458E-02
   .9902335E-02   .9755747E-02   .9611627E-02   .9590652E-02   .9762431E-02
   .9903173E-02   .1010060E-01   .1037316E-01   .1058266E-01   .1066231E-01
   .1064914E-01   .1060611E-01   .1056119E-01   .1044298E-01   .1001821E-01
   .9368549E-02   .8704963E-02   .8485269E-02   .8723308E-02   .9059937E-02
   .9223199E-02   .9161308E-02   .8887399E-02   .8346741E-02   .7791743E-02
   .7584008E-02   .7924126E-02   .8404682E-02   .8401619E-02   .7942449E-02
   .7343498E-02   .6650748E-02   .5976383E-02   .5311666E-02   .4674024E-02
   .3872624E-02   .2780115E-02   .1640956E-02   .9521665E-03   .3595588E-03
  -.3049145E-03  -.8484654E-03  -.1381262E-02  -.1911713E-02  -.2321168E-02
  -.2785100E-02  -.3340547E-02  -.3986999E-02  -.4423151E-02  -.4984967E-02
  -.5815883E-02  -.6828688E-02  -.7976403E-02  -.8960106E-02  -.9719861E-02
  -.1023377E-01  -.1041077E-01  -.1015820E-01  -.9944209E-02  -.1013620E-01
  -.1085722E-01  -.1194716E-01  -.1262383E-01  -.1261027E-01  -.1246827E-01
  -.1232290E-01  -.1213506E-01  -.1201197E-01  -.1199778E-01  -.1204499E-01
  -.1203425E-01  -.1169023E-01  -.1112261E-01  -.1064117E-01  -.1017992E-01
  -.9797330E-02  -.9836386E-02  -.1001943E-01  -.1024282E-01  -.1046977E-01
  -.1031800E-01  -.9821914E-02  -.9314905E-02  -.8792716E-02  -.8315686E-02
  -.7988120E-02  -.7576003E-02  -.7071897E-02  -.6656743E-02  -.6197307E-02
  -.5720251E-02  -.5367727E-02  -.4969342E-02  -.4478968E-02  -.4067118E-02
  -.3641853E-02  -.3098862E-02  -.2364090E-02  -.1372551E-02  -.3999204E-03
   .1772907E-03   .3418748E-03   .4676218E-03   .5864908E-03   .4954495E-03
   .2943126E-03   .1537405E-03   .1293639E-03   .1432413E-03  -.4605964E-04
  -.2978452E-03  -.4979856E-03  -.7177147E-03  -.6474285E-03  -.2082133E-03
   .2459728E-03   .4907590E-03   .7106339E-03   .8817801E-03   .1019995E-02
   .1275596E-02   .1539121E-02   .1688685E-02   .1720110E-02   .1748472E-02
   .2032946E-02   .2582159E-02   .3065024E-02   .3309324E-02   .3547037E-02
   .3926466E-02   .4270435E-02   .4432783E-02   .4423572E-02   .4338752E-02
   .4265210E-02   .4236969E-02   .4240323E-02   .4243482E-02   .4191971E-02
   .3857079E-02   .3084211E-02   .2396177E-02   .2247244E-02   .2245166E-02
   .2013941E-02   .1662669E-02   .1356869E-02   .9634172E-03   .4394188E-03
  -.1479152E-04  -.4768276E-03  -.9972047E-03  -.1384374E-02  -.1539601E-02
  -.1531982E-02  -.1484274E-02  -.1473470E-02  -.1472267E-02  -.1240094E-02
  -.7165823E-03  -.4282493E-04   .4005583E-03   .5207641E-03   .6389892E-03
   .7982875E-03   .9005694E-03   .7526577E-03   .4492390E-03   .4075341E-03
   .4143878E-03   .1343858E-03  -.2931878E-03  -.8158858E-03  -.1594100E-02
  -.2339990E-02  -.2715603E-02  -.2963269E-02  -.3347752E-02  -.3970641E-02
  -.4551996E-02  -.5020133E-02  -.5340308E-02  -.5447123E-02  -.5657544E-02
  -.6107598E-02  -.6607402E-02  -.6872797E-02  -.7101494E-02  -.7295656E-02
  -.7397974E-02  -.7408181E-02  -.7370389E-02  -.7328441E-02  -.7298232E-02
  -.7253755E-02  -.6990474E-02  -.6239322E-02  -.5238401E-02  -.4692056E-02
  -.4750773E-02  -.4859459E-02  -.4803948E-02  -.4657106E-02  -.4539136E-02
  -.4508660E-02  -.4548785E-02  -.4610273E-02  -.4670230E-02  -.4859384E-02
  -.5128158E-02  -.5278743E-02  -.5470839E-02  -.5666994E-02  -.5939000E-02
  -.6349049E-02  -.6472415E-02  -.6037427E-02  -.5391827E-02  -.4905220E-02
  -.4528125E-02  -.4064654E-02  -.3657665E-02  -.3579553E-02  -.3723723E-02
  -.3429551E-02  -.2427707E-02  -.1116671E-02   .2730008E-04   .1027054E-02
   .1736526E-02   .2028218E-02   .2285011E-02   .2761897E-02   .3481138E-02
   .4094415E-02   .4541456E-02   .4993310E-02   .5344740E-02   .5505826E-02
   .5514526E-02   .5471411E-02   .5475058E-02   .5704727E-02   .6224411E-02
   .6741690E-02   .7201199E-02   .7707736E-02   .8106195E-02   .8306870E-02
   .8504848E-02   .8760742E-02   .8939883E-02   .9190090E-02   .9311219E-02
   .9430623E-02   .9997603E-02   .1069761E-01   .1110725E-01   .1096593E-01
   .1034098E-01   .9736389E-02   .9463459E-02   .9317564E-02   .8993475E-02
   .8617135E-02   .8379043E-02   .8321566E-02   .8370284E-02   .8428091E-02
   .8442708E-02   .8406435E-02   .8350950E-02   .8313717E-02   .8299914E-02
   .8301262E-02   .8274785E-02   .8059854E-02   .7702099E-02   .7463012E-02
   .7356970E-02   .7529404E-02   .7784811E-02   .7882421E-02   .7626261E-02
   .7163326E-02   .6958157E-02   .6998719E-02   .7068085E-02   .7169997E-02
   .7241753E-02   .7120271E-02   .6905234E-02   .6485469E-02   .6041007E-02
   .5759257E-02   .5676618E-02   .5860345E-02   .6280245E-02   .6406433E-02
   .5946930E-02   .5074719E-02   .4123835E-02   .3479271E-02   .3174469E-02
   .2869835E-02   .2355558E-02   .1831518E-02   .1507763E-02   .1411399E-02
   .1410574E-02   .1190681E-02   .7058180E-03   .3219911E-03   .4635479E-03
   .1091134E-02   .1725126E-02   .2035568E-02   .2050047E-02   .1974257E-02
   .1954000E-02   .1945895E-02   .1525133E-02   .8232689E-03   .2522981E-03
  -.1035553E-03  -.1971300E-03  -.8766613E-04   .1051470E-03   .2311739E-03
   .4026923E-04  -.4764862E-03  -.1136481E-02  -.1558599E-02  -.1650848E-02
  -.1458054E-02  -.8439188E-03  -.2689615E-03  -.1797122E-03  -.2622165E-03
  -.3659197E-03  -.5946226E-03  -.7915544E-03  -.6195390E-03  -.4484303E-04
   .7077495E-03   .1166748E-02   .1043086E-02   .6819159E-03   .6663559E-03
   .1127336E-02   .1658771E-02   .1898187E-02   .1670377E-02   .1504189E-02
   .1665426E-02   .1772192E-02   .1502593E-02   .9005796E-03   .4150664E-03
   .4919392E-03   .1027409E-02   .1319710E-02   .1019657E-02   .2625996E-03
  -.5512554E-03  -.9979315E-03  -.1056259E-02  -.1102934E-02  -.1197439E-02
  -.1354901E-02  -.1668934E-02  -.1954489E-02  -.2116424E-02  -.2351372E-02
  -.2588691E-02  -.2752339E-02  -.2749647E-02  -.2480308E-02  -.2185431E-02
  -.2091528E-02  -.2414583E-02  -.3089063E-02  -.3904577E-02  -.4629001E-02
  -.5005537E-02  -.5035654E-02  -.4913243E-02  -.4859476E-02  -.5184989E-02
  -.6004649E-02  -.6729885E-02  -.6863383E-02  -.6793098E-02  -.6936374E-02
  -.7211576E-02  -.7419349E-02  -.7473021E-02  -.7438667E-02  -.7569310E-02
  -.7715499E-02  -.7620693E-02  -.7620981E-02  -.7926666E-02  -.8334797E-02
  -.8808784E-02  -.9272527E-02  -.9362917E-02  -.9177991E-02  -.8910638E-02
  -.8533496E-02  -.7989456E-02  -.7360550E-02  -.6924410E-02  -.6777227E-02
  -.6735885E-02  -.6239240E-02  -.5178872E-02  -.3992102E-02  -.3054565E-02
  -.2417639E-02  -.1967061E-02  -.1679160E-02  -.1308481E-02  -.7362880E-03
   .2152384E-04   .1006392E-02   .1986959E-02   .2792066E-02   .3380348E-02
   .3671931E-02   .3725874E-02   .3686295E-02   .3697403E-02   .3949893E-02
   .4232266E-02   .4405065E-02   .4591596E-02   .4733287E-02   .4771164E-02
   .4718803E-02   .4624444E-02   .4492476E-02   .4127120E-02   .3529301E-02
   .3014355E-02   .2761635E-02   .2670302E-02   .2384918E-02   .1800016E-02
   .1020629E-02   .2494512E-03  -.2560636E-03  -.6547215E-03  -.1104229E-02
  -.1487186E-02  -.1740848E-02  -.2102948E-02  -.2820050E-02  -.3492070E-02
  -.3866429E-02  -.4116344E-02  -.4314599E-02  -.4680501E-02  -.5240943E-02
  -.5704886E-02  -.5901514E-02  -.5880880E-02  -.5785803E-02  -.5691554E-02
  -.5414795E-02  -.4931663E-02  -.4534869E-02  -.4395402E-02  -.4445285E-02
  -.4500478E-02  -.4290263E-02  -.3981145E-02  -.3718907E-02  -.3454022E-02
  -.3461555E-02  -.3605141E-02  -.3550238E-02  -.3354885E-02  -.3141013E-02
  -.2779593E-02  -.2260053E-02  -.1809002E-02  -.1360648E-02  -.8749394E-03
  -.5330839E-03  -.3650966E-03  -.8509388E-04   .4144191E-03   .8947567E-03
   .1370233E-02   .1915899E-02   .2575792E-02   .3271994E-02   .3745770E-02
   .3903015E-02   .3863813E-02   .3847361E-02   .4159201E-02   .4767813E-02
   .5292335E-02   .5519405E-02   .5537632E-02   .5705790E-02   .6105768E-02
   .6289832E-02   .6253474E-02   .6302423E-02   .6434440E-02   .6536590E-02
   .6538583E-02   .6463643E-02   .6355067E-02   .6254585E-02   .6227535E-02
   .6439118E-02   .6639478E-02   .6494689E-02   .6167544E-02   .5948728E-02
   .6112117E-02   .6384992E-02   .6397709E-02   .6393433E-02   .6337626E-02
   .5846575E-02   .5063534E-02   .4470164E-02   .4243622E-02   .4059355E-02
   .3683462E-02   .3294509E-02   .3083103E-02   .3071891E-02   .3125529E-02
   .2927275E-02   .2419719E-02   .1947862E-02   .1743560E-02   .1781851E-02
   .1878149E-02   .1718537E-02   .1454449E-02   .1437832E-02   .1612233E-02
   .1779307E-02   .1830944E-02   .1775079E-02   .1646082E-02   .1338366E-02
   .1030665E-02   .8311811E-03   .7723577E-03   .7440935E-03   .5232516E-03
   .2181447E-03  -.4211438E-05  -.9311638E-04  -.9717735E-04  -.4953234E-04
   .2031229E-03   .6581422E-03   .1044525E-02   .1194464E-02   .1172366E-02
   .1334524E-02   .1826446E-02   .2545716E-02   .3275806E-02   .3759027E-02
   .4176050E-02   .4870561E-02   .5701503E-02   .6274953E-02   .6465816E-02
   .6411493E-02   .6289830E-02   .6213159E-02   .6216027E-02   .6264368E-02
   .6308820E-02   .6284542E-02   .6002475E-02   .5491224E-02   .5063845E-02
   .4862381E-02   .4626541E-02   .4211812E-02   .3831073E-02   .3650010E-02
   .3657096E-02   .3744238E-02   .3796820E-02   .3745868E-02   .3401000E-02
   .2602007E-02   .1633861E-02   .7703296E-03   .1034512E-03  -.4553613E-03
  -.9705245E-03  -.1297334E-02  -.1384778E-02  -.1325963E-02  -.1292593E-02
  -.1578366E-02  -.2333345E-02  -.3038331E-02  -.3388946E-02  -.3589281E-02
  -.3886878E-02  -.4413197E-02  -.4875681E-02  -.4909475E-02  -.4607732E-02
  -.4514211E-02  -.4684577E-02  -.4912788E-02  -.5035947E-02  -.5027755E-02
  -.4953738E-02  -.4886580E-02  -.4858173E-02  -.4859783E-02  -.4870293E-02
  -.4873780E-02  -.4865176E-02  -.4850915E-02  -.4840641E-02  -.4837176E-02
  -.4839094E-02  -.4842023E-02  -.4845229E-02  -.4848163E-02  -.4827331E-02
  -.4609323E-02  -.4102102E-02  -.3610814E-02  -.3352548E-02  -.3141149E-02
  -.2734252E-02  -.2314223E-02  -.2078021E-02  -.2047219E-02  -.2100447E-02
  -.1989161E-02  -.1732686E-02  -.1548246E-02  -.1288615E-02  -.1033192E-02
  -.8743441E-03  -.6437185E-03  -.1821272E-03   .2447176E-03   .2502195E-03
  -.2488363E-03  -.8293058E-03  -.1181729E-02  -.1407780E-02  -.1601871E-02
  -.1713849E-02  -.1964151E-02  -.2274647E-02  -.2493534E-02  -.2573520E-02
  -.2565485E-02  -.2543022E-02  -.2546184E-02  -.2575182E-02  -.2612724E-02
  -.2653593E-02  -.2817878E-02  -.3137090E-02  -.3195709E-02  -.2982866E-02
  -.2741278E-02  -.2625847E-02  -.2527653E-02  -.2339171E-02  -.2373147E-02
  -.2502077E-02  -.2460207E-02  -.2389537E-02  -.2150801E-02  -.1846816E-02
  -.1666263E-02  -.1652682E-02  -.1717955E-02  -.1628358E-02  -.1061943E-02
  -.2336992E-03   .2923112E-03   .7453866E-03   .1401731E-02   .2155607E-02
   .2805031E-02   .3065372E-02   .3234460E-02   .3437189E-02   .3614218E-02
   .3718190E-02   .3766807E-02   .3924211E-02   .4384343E-02   .5042034E-02
   .5670675E-02   .5940758E-02   .6117829E-02   .6315659E-02   .6481691E-02
   .6579145E-02   .6618035E-02   .6639787E-02   .6783756E-02   .7137870E-02
   .7278475E-02   .7089855E-02   .6816231E-02   .6664590E-02   .6674468E-02
   .6768037E-02   .6853605E-02   .6888726E-02   .6884212E-02   .6858864E-02
   .6731016E-02   .6322886E-02   .5801866E-02   .5453099E-02   .5276837E-02
   .4980201E-02   .4584745E-02   .4287063E-02   .4084020E-02   .3794091E-02
   .3582857E-02   .3232048E-02   .2524388E-02   .1683885E-02   .8501985E-03
   .2222425E-03  -.1500028E-03  -.5373286E-03  -.9516313E-03  -.1237914E-02
  -.1350208E-02  -.1364012E-02  -.1358652E-02  -.1368299E-02  -.1394546E-02
  -.1421278E-02  -.1427790E-02  -.1334938E-02  -.9589596E-03  -.4468323E-03
  -.9208324E-04   .5783486E-04   .3279830E-03   .7605523E-03   .1120344E-02
   .1277796E-02   .1271551E-02   .1213990E-02   .1187330E-02   .1210116E-02
   .1258457E-02   .1296177E-02   .1295097E-02   .1282728E-02   .1271318E-02
   .1279582E-02   .1301700E-02   .1249886E-02   .9394449E-03   .6711826E-03
   .5060893E-03   .5438339E-03   .5344055E-03   .3436718E-03   .3173644E-03
   .3004867E-03   .1127302E-03  -.1255655E-03  -.2835379E-03  -.3398846E-03
  -.3935943E-03  -.6870837E-03  -.8956807E-03  -.7345705E-03  -.2103037E-03
   .1953252E-03   .4371110E-03   .6330360E-03   .7107116E-03   .3874989E-03
  -.4174238E-03  -.1078530E-02  -.1110184E-02  -.7483867E-03  -.4426945E-03
  -.6151761E-03  -.1227213E-02  -.1815286E-02  -.2093112E-02  -.2086416E-02
  -.1967010E-02  -.1887184E-02  -.1890075E-02  -.2032031E-02  -.2679782E-02
  -.3778475E-02  -.4698281E-02  -.5073976E-02  -.5014430E-02  -.4836455E-02
  -.4761356E-02  -.4864000E-02  -.5310310E-02  -.6176923E-02  -.6930455E-02
  -.7292911E-02  -.7477272E-02  -.7575942E-02  -.7627113E-02  -.7672778E-02
  -.7767023E-02  -.8099736E-02  -.8684031E-02  -.9392536E-02  -.1004354E-01
  -.1040326E-01  -.1047458E-01  -.1044060E-01  -.1062576E-01  -.1115853E-01
  -.1152494E-01  -.1151654E-01  -.1154952E-01  -.1170710E-01  -.1187687E-01
  -.1195115E-01  -.1176049E-01  -.1126162E-01  -.1078005E-01  -.1055338E-01
  -.1054512E-01  -.1043029E-01  -.9965146E-02  -.9278007E-02  -.8693224E-02
  -.8458427E-02  -.8276827E-02  -.7897422E-02  -.7262245E-02  -.6723286E-02
  -.6683062E-02  -.7200096E-02  -.7797866E-02  -.8099231E-02  -.8075023E-02
  -.7909757E-02  -.7787216E-02  -.7773580E-02  -.7832613E-02  -.7873660E-02
  -.7677650E-02  -.7130233E-02  -.6390624E-02  -.5637089E-02  -.5171746E-02
  -.5067166E-02  -.5180832E-02  -.5309713E-02  -.5330418E-02  -.5106969E-02
  -.4402698E-02  -.3369598E-02  -.2558925E-02  -.2255176E-02  -.2201391E-02
  -.1939955E-02  -.1381214E-02  -.5781233E-03   .2367788E-03   .1001931E-02
   .1656770E-02   .2293963E-02   .2790002E-02   .3167074E-02   .3647753E-02
   .4256584E-02   .4989486E-02   .5585704E-02   .5988976E-02   .6289418E-02
   .6256270E-02   .6132493E-02   .6352491E-02   .6812657E-02   .7320506E-02
   .7911694E-02   .8408535E-02   .8788695E-02   .9401827E-02   .1030777E-01
   .1109159E-01   .1158704E-01   .1200818E-01   .1235402E-01   .1264107E-01
   .1307341E-01   .1355302E-01   .1386546E-01   .1405254E-01   .1441240E-01
   .1487423E-01   .1509555E-01   .1479188E-01   .1431466E-01   .1428760E-01
   .1470797E-01   .1526679E-01   .1580012E-01   .1591166E-01   .1560799E-01
   .1515165E-01   .1458515E-01   .1409368E-01   .1377089E-01   .1347247E-01
   .1333979E-01   .1308935E-01   .1243365E-01   .1168234E-01   .1122830E-01
   .1114436E-01   .1124242E-01   .1129087E-01   .1096902E-01   .1038142E-01
   .9913682E-02   .9749476E-02   .9810214E-02   .9868664E-02   .9558893E-02
   .8971500E-02   .8489488E-02   .8247521E-02   .7930360E-02   .7420108E-02
   .6694670E-02   .5976403E-02   .5511233E-02   .5096857E-02   .4612148E-02
   .3954493E-02   .3281625E-02   .2867225E-02   .2689761E-02   .2382857E-02
   .1854230E-02   .1110784E-02   .3972072E-03   .6333621E-05  -.5141016E-04
  -.8464015E-05  -.2253479E-03  -.5192501E-03  -.7632325E-03  -.1051375E-02
  -.1290764E-02  -.1442490E-02  -.1699061E-02  -.1916091E-02  -.1870715E-02
  -.1893218E-02  -.2010262E-02  -.2157784E-02  -.2251594E-02  -.2275094E-02
  -.2207189E-02  -.1952144E-02  -.1687233E-02  -.1599253E-02  -.1902366E-02
  -.2509833E-02  -.3016173E-02  -.3184644E-02  -.2912879E-02  -.2576442E-02
  -.2606188E-02  -.2871096E-02  -.2921451E-02  -.2518083E-02  -.2021048E-02
  -.1933552E-02  -.2392816E-02  -.2968592E-02  -.3286457E-02  -.3291389E-02
  -.3119780E-02  -.2772479E-02  -.2243047E-02  -.1804413E-02  -.1436067E-02
  -.9755109E-03  -.5772455E-03  -.3792179E-03  -.3588983E-03  -.4108577E-03
  -.4467767E-03  -.4326302E-03  -.3638735E-03  -.7791532E-04   .6611353E-03
   .1615321E-02   .2127619E-02   .2005617E-02   .1723357E-02   .1517337E-02
   .1703868E-02   .2129962E-02   .2458865E-02   .2418425E-02   .2030370E-02
   .1716515E-02   .1422905E-02   .1177513E-02   .1032228E-02   .8353947E-03
   .3901783E-03  -.9669441E-04  -.3780800E-03  -.4207311E-03  -.3393121E-03
  -.2644794E-03  -.2524960E-03  -.2880260E-03  -.3306042E-03  -.3500210E-03
  -.3444537E-03  -.3275364E-03  -.3138517E-03  -.3121972E-03  -.3254652E-03
  -.3636200E-03  -.4088716E-03  -.4434052E-03  -.5521864E-03  -.8526990E-03
  -.9693788E-03  -.7907938E-03  -.5594460E-03  -.5580100E-03  -.1083088E-02
  -.2086339E-02  -.3014517E-02  -.3448506E-02  -.3423010E-02  -.3228311E-02
  -.3119453E-02  -.3153088E-02  -.3327829E-02  -.3798102E-02  -.4397720E-02
  -.4789978E-02  -.4872123E-02  -.4770337E-02  -.4664250E-02  -.4698820E-02
  -.5105053E-02  -.5716250E-02  -.6151052E-02  -.6266688E-02  -.6168438E-02
  -.5999235E-02  -.5620096E-02  -.5114980E-02  -.4747908E-02  -.4637495E-02
  -.4701496E-02  -.4735447E-02  -.4405547E-02  -.3817835E-02  -.3355968E-02
  -.3198745E-02  -.3268969E-02  -.3393705E-02  -.3456030E-02  -.3433766E-02
  -.3335334E-02  -.2982310E-02  -.2231174E-02  -.1549564E-02  -.1239545E-02
  -.1321386E-02  -.1729266E-02  -.2117344E-02  -.2230001E-02  -.1882871E-02
  -.1229472E-02  -.7130607E-03  -.5464695E-03  -.6370959E-03  -.7448986E-03
  -.5281083E-03   .8894396E-05   .5052189E-03   .7594794E-03   .9646708E-03
   .1121486E-02   .1224535E-02   .1312273E-02   .1343262E-02   .1555222E-02
   .1848399E-02   .2020647E-02   .1849326E-02   .1321690E-02   .1004737E-02
   .1273586E-02   .1805156E-02   .2186500E-02   .2276280E-02   .2175179E-02
   .2053894E-02   .2012847E-02   .2053230E-02   .2121087E-02   .2166476E-02
   .2176833E-02   .2166481E-02   .2154684E-02   .2154929E-02   .2164786E-02
   .2176040E-02   .2184111E-02   .2189314E-02   .2191127E-02   .2179682E-02
   .2148721E-02   .2120300E-02   .2108916E-02   .2134983E-02   .2350716E-02
   .2831699E-02   .3290481E-02   .3528854E-02   .3713065E-02   .3920012E-02
   .4024326E-02   .4051377E-02   .3819851E-02   .3494756E-02   .3285273E-02
   .3244226E-02   .3296930E-02   .3351482E-02   .3359882E-02   .3327693E-02
   .3289077E-02   .3269576E-02   .3271485E-02   .3281330E-02   .3272485E-02
   .3103019E-02   .2615977E-02   .2068442E-02   .1730527E-02   .1652757E-02
   .1717115E-02   .1782081E-02   .1778899E-02   .1708153E-02   .1488792E-02
   .1002843E-02   .4992977E-03   .2118610E-03   .1354525E-03   .2664735E-04
  -.3834984E-03  -.9110552E-03  -.1268170E-02  -.1376684E-02  -.1464126E-02
  -.1823867E-02  -.2291927E-02  -.2604543E-02  -.2686711E-02  -.2627068E-02
  -.2550364E-02  -.2526471E-02  -.2551866E-02  -.2591625E-02  -.2612548E-02
  -.2609022E-02  -.2596041E-02  -.2713219E-02  -.3147292E-02  -.3651942E-02
  -.3945054E-02  -.3980705E-02  -.3895980E-02  -.3967625E-02  -.4424945E-02
  -.4989771E-02  -.5335171E-02  -.5403608E-02  -.5452627E-02  -.5791892E-02
  -.6255601E-02  -.6567500E-02  -.6643872E-02  -.6571725E-02  -.6480097E-02
  -.6453652E-02  -.6504002E-02  -.6571770E-02  -.6580468E-02  -.6370027E-02
  -.5691656E-02  -.4672937E-02  -.3837382E-02  -.3350201E-02  -.2938454E-02
  -.2572675E-02  -.2194016E-02  -.1639624E-02  -.1110253E-02  -.8320890E-03
  -.8011907E-03  -.7271656E-03  -.3311387E-03   .1746038E-03   .4988316E-03
   .5552062E-03   .3249013E-03  -.8475836E-04  -.2825147E-03  -.4233458E-03
  -.6060217E-03  -.7760414E-03  -.8677975E-03  -.8718873E-03  -.8477607E-03
  -.8466159E-03  -.9755474E-03  -.1309119E-02  -.1520202E-02  -.1722928E-02
  -.1963192E-02  -.2040964E-02  -.1710363E-02  -.1169003E-02  -.8054123E-03
  -.8456964E-03  -.1375835E-02  -.2032790E-02  -.2325759E-02  -.2057638E-02
  -.1692632E-02  -.1365365E-02  -.1116419E-02  -.1012864E-02  -.1026572E-02
  -.1077332E-02  -.1094049E-02  -.9792484E-03  -.6481590E-03  -.5102988E-03
  -.6988986E-03  -.9833331E-03  -.1158936E-02  -.1180670E-02  -.1117576E-02
  -.1062934E-02  -.1068650E-02  -.1107155E-02  -.1154953E-02  -.1192282E-02
  -.1204743E-02  -.1199196E-02  -.1189373E-02  -.1184827E-02  -.1189657E-02
  -.1199178E-02  -.1209971E-02  -.1228383E-02  -.1352289E-02  -.1784100E-02
  -.2327907E-02  -.2578402E-02  -.2250532E-02  -.1652495E-02  -.1226556E-02
  -.1154529E-02  -.1423430E-02  -.2116340E-02  -.3113706E-02  -.3935207E-02
  -.4274716E-02  -.4222453E-02  -.4052172E-02  -.3965586E-02  -.4005410E-02
  -.4103723E-02  -.4178641E-02  -.4195513E-02  -.4170373E-02  -.4137628E-02
  -.4119847E-02  -.4121139E-02  -.4148709E-02  -.4382847E-02  -.5288349E-02
  -.6511579E-02  -.6787197E-02  -.5914999E-02  -.4999843E-02  -.4646466E-02
  -.4537437E-02  -.4420400E-02  -.4285537E-02  -.4175840E-02  -.4112563E-02
  -.4082485E-02  -.3968414E-02  -.3540339E-02  -.2891114E-02  -.2227513E-02
  -.2040956E-02  -.2432448E-02  -.3022379E-02  -.3034638E-02  -.2605166E-02
  -.1991570E-02  -.1473548E-02  -.1252128E-02  -.1279733E-02  -.1376289E-02
  -.1433157E-02  -.1426155E-02  -.1381434E-02  -.1333067E-02  -.1287981E-02
  -.1172293E-02  -.7705638E-03  -.1426649E-03   .6213951E-03   .1247484E-02
   .1526151E-02   .1514561E-02   .1403593E-02   .1346798E-02   .1452522E-02
   .2005942E-02   .3014861E-02   .3968794E-02   .4436021E-02   .4432549E-02
   .4238608E-02   .4103689E-02   .4111457E-02   .4202755E-02   .4285853E-02
   .4311423E-02   .4287291E-02   .4246112E-02   .4215298E-02   .4185686E-02
   .4150971E-02   .4068512E-02   .3755496E-02   .3559381E-02   .3705655E-02
   .3987105E-02   .4179235E-02   .4226399E-02   .4132613E-02   .3777005E-02
   .3499734E-02   .3295593E-02   .3047558E-02   .2845355E-02   .2697525E-02
   .2388549E-02   .2158676E-02   .2008124E-02   .2025679E-02   .2046250E-02
   .2164277E-02   .2504209E-02   .3118792E-02   .3719468E-02   .3691586E-02
   .2868151E-02   .1841878E-02   .1246612E-02   .1247038E-02   .1809141E-02
   .2529648E-02   .2953783E-02   .2991719E-02   .2878583E-02   .3032899E-02
   .3259160E-02   .3537677E-02   .3831272E-02   .3778528E-02   .3600056E-02
   .3347992E-02   .3079786E-02   .3207960E-02   .3700415E-02   .4206677E-02
   .4668508E-02   .4796374E-02   .4532739E-02   .4198149E-02   .4084893E-02
   .4444256E-02   .5067122E-02   .5531101E-02   .5715942E-02   .5917968E-02
   .6030370E-02   .6131246E-02   .6130452E-02   .6152692E-02   .6064540E-02
   .5782658E-02   .5501802E-02   .5311130E-02   .4974831E-02   .4510878E-02
   .4161504E-02   .4036197E-02   .4068561E-02   .4137962E-02   .4166146E-02
   .4140180E-02   .4039504E-02   .3702404E-02   .3434520E-02   .3217638E-02
   .2887999E-02   .2307631E-02   .1651351E-02   .1234389E-02   .1137188E-02
   .1273559E-02   .1663052E-02   .1871288E-02   .1673727E-02   .1325374E-02
   .1095331E-02   .1060993E-02   .1141879E-02   .1227418E-02   .1258140E-02
   .1237570E-02   .1200935E-02   .1179758E-02   .1183127E-02   .1201066E-02
   .1217559E-02   .1227551E-02   .1234079E-02   .1256259E-02   .1297007E-02
   .1336820E-02   .1360215E-02   .1368372E-02   .1370902E-02   .1375364E-02
   .1381066E-02   .1349839E-02   .1107754E-02   .8685366E-03   .9548661E-03
   .1230496E-02   .1453266E-02   .1477475E-02   .1119608E-02   .4757591E-03
  -.4576935E-04  -.2674154E-03  -.4609422E-03  -.8131475E-03  -.1159933E-02
  -.1346606E-02  -.1333017E-02  -.1046669E-02  -.7747812E-03  -.8468142E-03
  -.1123946E-02  -.1357379E-02  -.1433604E-02  -.1426565E-02  -.1662611E-02
  -.2413712E-02  -.3379511E-02  -.4035766E-02  -.4209412E-02  -.4083747E-02
  -.3924482E-02  -.3885472E-02  -.3999878E-02  -.4398722E-02  -.5042243E-02
  -.5798872E-02  -.6491596E-02  -.6839596E-02  -.6620423E-02  -.6045505E-02
  -.5815894E-02  -.6182791E-02  -.6776002E-02  -.7354535E-02  -.7620650E-02
  -.7415099E-02  -.7043239E-02  -.6846601E-02  -.7082367E-02  -.7477614E-02
  -.7794591E-02  -.8095761E-02  -.8302476E-02  -.8375199E-02  -.8361304E-02
  -.8333983E-02  -.8331471E-02  -.8311636E-02  -.8044770E-02  -.7522260E-02
  -.7066647E-02  -.6869619E-02  -.6852475E-02  -.6657168E-02  -.6173894E-02
  -.5661998E-02  -.5135014E-02  -.4594655E-02  -.4230833E-02  -.4113778E-02
  -.4153189E-02  -.4216224E-02  -.4229162E-02  -.4188074E-02  -.4099434E-02
  -.3824096E-02  -.3578875E-02  -.3592385E-02  -.3310302E-02  -.2502301E-02
  -.1691625E-02  -.1286007E-02  -.1285991E-02  -.1457560E-02  -.1585576E-02
  -.1591235E-02  -.1480274E-02  -.1137091E-02  -.6156782E-03  -.2174965E-03
  -.8649679E-04  -.1525265E-03  -.2960969E-03  -.5766548E-03  -.7825033E-03
  -.6631328E-03  -.3843426E-03  -.1824735E-03  -.1789219E-03  -.5156575E-03
  -.1081589E-02  -.1446237E-02  -.1030823E-02   .7963636E-04   .1101145E-02
   .1554569E-02   .1494373E-02   .1254693E-02   .1111159E-02   .1139488E-02
   .1267050E-02   .1424564E-02   .1788052E-02   .2567085E-02   .3492655E-02
   .4101792E-02   .4258069E-02   .4146323E-02   .4056008E-02   .4359782E-02
   .5207787E-02   .5980968E-02   .6098364E-02   .5738632E-02   .5341149E-02
   .5170632E-02   .5227609E-02   .5407368E-02   .5782252E-02   .6262815E-02
   .6319263E-02   .5632782E-02   .4613288E-02   .3905126E-02   .3730426E-02
   .3892608E-02   .4089757E-02   .4151000E-02   .4080438E-02   .3969954E-02
   .3850525E-02   .3362890E-02   .2373673E-02   .1472884E-02   .1066156E-02
   .1100025E-02   .1289802E-02   .1362171E-02   .1041671E-02   .3667925E-03
  -.4365240E-03  -.1171512E-02  -.1585834E-02  -.1660032E-02  -.1568452E-02
  -.1509070E-02  -.1702093E-02  -.2068260E-02  -.2354438E-02  -.2848556E-02
  -.3601617E-02  -.4240837E-02  -.4518834E-02  -.4493450E-02  -.4385758E-02
  -.4518148E-02  -.5037369E-02  -.5783195E-02  -.6567749E-02  -.7065492E-02
  -.7185543E-02  -.7083944E-02  -.6969592E-02  -.6948458E-02  -.7007730E-02
  -.7081981E-02  -.7122212E-02  -.7121303E-02  -.7102245E-02  -.7087903E-02
  -.7088580E-02  -.7102806E-02  -.7122184E-02  -.7140032E-02  -.7152034E-02
  -.7161084E-02  -.7169939E-02  -.7177106E-02  -.7185377E-02  -.7193674E-02
  -.7200269E-02  -.7203498E-02  -.7182969E-02  -.6965460E-02  -.6457025E-02
  -.5963269E-02  -.5723024E-02  -.5729242E-02  -.5809465E-02  -.5673045E-02
  -.5193896E-02  -.4689082E-02  -.4425992E-02  -.4421078E-02  -.4530271E-02
  -.4611782E-02  -.4591970E-02  -.4320034E-02  -.3733414E-02  -.2997667E-02
  -.2257374E-02  -.1791397E-02  -.1672622E-02  -.1753039E-02  -.1824173E-02
  -.1609883E-02  -.8632484E-03   .1675451E-03   .9129896E-03   .1137680E-02
   .1007368E-02   .8116786E-03   .7349555E-03   .7904685E-03   .9153202E-03
   .1204901E-02   .1725780E-02   .2190177E-02   .2397175E-02   .2398419E-02
   .2496875E-02   .2752457E-02   .2968909E-02   .3275356E-02   .3565108E-02
   .3716038E-02   .3728022E-02   .3679346E-02   .3620803E-02   .3426279E-02
   .3163245E-02   .3207725E-02   .3477935E-02   .3725618E-02   .3819871E-02
   .3785776E-02   .3716806E-02   .3684292E-02   .3726875E-02   .3976113E-02
   .4465495E-02   .4733082E-02   .4477824E-02   .4008913E-02   .3692812E-02
   .3644816E-02   .3762255E-02   .3891360E-02   .3941770E-02   .3918611E-02
   .3875391E-02   .3854141E-02   .3842565E-02   .3676076E-02   .3413747E-02
   .3447520E-02   .3708242E-02   .3957308E-02   .4058208E-02   .4027529E-02
   .3956238E-02   .3916724E-02   .3924784E-02   .3955812E-02   .3979500E-02
   .3982408E-02   .3948739E-02   .3735697E-02   .3410276E-02   .3179881E-02
   .2746016E-02   .2425090E-02   .2812324E-02   .3535112E-02   .4022416E-02
   .3912057E-02   .3249610E-02   .2574891E-02   .2240811E-02   .2083096E-02
   .1941981E-02   .1848652E-02   .1581736E-02   .1249631E-02   .1028697E-02
   .9669450E-03   .1002918E-02   .1050381E-02   .1058423E-02   .1031182E-02
   .9926168E-03   .9635718E-03   .9502755E-03   .9502124E-03   .9511279E-03
   .9468178E-03   .9384490E-03   .9292419E-03   .9330736E-03   .9473923E-03
   .9635277E-03   .1162481E-02   .1655821E-02   .2145878E-02   .2423821E-02
   .2682557E-02   .3102395E-02   .3501768E-02   .3710558E-02   .3682446E-02
   .3165691E-02   .2392616E-02   .2228794E-02   .2806887E-02   .3534704E-02
   .3903457E-02   .3688846E-02   .3257438E-02   .3150627E-02   .3356930E-02
   .3624349E-02   .3768983E-02   .3762426E-02   .3678943E-02   .3607299E-02
   .3587959E-02   .3608847E-02   .3636066E-02   .3646983E-02   .3636825E-02
   .3615831E-02   .3596392E-02   .3582552E-02   .3572029E-02   .3562017E-02
   .3551631E-02   .3538299E-02   .3526351E-02   .3516774E-02   .3507798E-02
   .3500103E-02   .3493187E-02   .3490912E-02   .3493924E-02   .3499129E-02
   .3501071E-02   .3498621E-02   .3494008E-02   .3490755E-02   .3489787E-02
   .3488466E-02   .3484971E-02   .3476602E-02   .3429080E-02   .3134087E-02
   .2558569E-02   .1815259E-02   .1099983E-02   .6882106E-03   .6161909E-03
   .7167269E-03   .8148084E-03   .8304518E-03   .7833554E-03   .7327593E-03
   .7161762E-03   .7342015E-03   .7291505E-03   .5096199E-03   .2830900E-03
   .3646206E-03   .5537798E-03   .2140193E-03  -.7430898E-03  -.1655201E-02
  -.2070947E-02  -.2027986E-02  -.1817379E-02  -.1724012E-02  -.2025215E-02
  -.2617101E-02  -.2949486E-02  -.3210746E-02  -.3766055E-02  -.4346336E-02
  -.4668221E-02  -.4670344E-02  -.4324530E-02  -.3960251E-02  -.3784258E-02
  -.3857024E-02  -.4202678E-02  -.4475495E-02  -.4093553E-02  -.3245906E-02
  -.2483897E-02  -.1968923E-02  -.1771483E-02  -.1797727E-02  -.1880914E-02
  -.1907461E-02  -.1864421E-02  -.1798487E-02  -.1754609E-02  -.1738807E-02
  -.1661970E-02  -.1089974E-02  -.2572930E-04   .8821371E-03   .1253476E-02
   .1182793E-02   .9750989E-03   .8616174E-03   .8941278E-03   .9950590E-03
   .1069529E-02   .1079359E-02   .1028410E-02   .9507705E-03   .8938496E-03
   .8737668E-03   .8780060E-03   .8821117E-03   .8329314E-03   .4844035E-03
  -.3420431E-03  -.1307707E-02  -.1887198E-02  -.1795752E-02  -.1434906E-02
  -.1363296E-02  -.1587724E-02  -.1870249E-02  -.2031244E-02  -.2038680E-02
  -.1967181E-02  -.1905037E-02  -.1894209E-02  -.1923874E-02  -.1960309E-02
  -.1979635E-02  -.1979595E-02  -.1974526E-02  -.1972295E-02  -.1975557E-02
  -.1981579E-02  -.1986451E-02  -.1988700E-02  -.1989468E-02  -.1989435E-02
  -.1988196E-02  -.1986225E-02  -.1984350E-02  -.1984639E-02  -.1986423E-02
  -.1988595E-02  -.1991868E-02  -.1996177E-02  -.2000606E-02  -.2003262E-02
  -.2005602E-02  -.2011850E-02  -.2020023E-02  -.2025507E-02  -.2029127E-02
  -.2031337E-02  -.2034860E-02  -.2039715E-02  -.2044903E-02  -.2049621E-02
  -.2053425E-02  -.2057874E-02  -.2062326E-02  -.2065057E-02  -.2065609E-02
  -.2067002E-02  -.2068343E-02  -.2067433E-02  -.2066386E-02  -.2064739E-02
  -.2060052E-02  -.2031136E-02  -.1803746E-02  -.1286847E-02  -.7900094E-03
  -.5535366E-03  -.5634540E-03  -.6731955E-03  -.7722496E-03  -.9895926E-03
  -.1404134E-02  -.1406780E-02  -.6036981E-03   .3700799E-03   .8997821E-03
   .8895668E-03   .4385933E-03  -.2592626E-03  -.7981850E-03  -.1128315E-02
  -.1309080E-02  -.1346606E-02  -.1527239E-02  -.1798584E-02  -.2001528E-02
  -.2069925E-02  -.1994373E-02  -.1498453E-02  -.4440840E-03   .5428239E-03
   .9962310E-03   .9330036E-03   .4871277E-03  -.1731668E-03  -.6381149E-03
  -.5822787E-03  -.2146879E-03  -.2660429E-03  -.5377954E-03  -.2969480E-03
   .2784390E-03   .7450247E-03   .9008277E-03   .7972866E-03   .4174013E-03
  -.3387285E-03  -.8862907E-03  -.5414721E-03   .2557217E-03   .8497072E-03
   .9831751E-03   .7453991E-03   .6388147E-04  -.1029601E-02  -.1732068E-02
  -.1404500E-02  -.3508838E-03   .5752835E-03   .9093477E-03   .7569624E-03
   .4716668E-03   .3183582E-03   .3501277E-03   .4707817E-03   .5704373E-03
   .5985492E-03   .5719717E-03   .5327869E-03   .5152141E-03   .5247336E-03
   .5457124E-03   .5624988E-03   .5710887E-03   .5879845E-03   .6252042E-03
   .6613909E-03   .6791191E-03   .6789962E-03   .6702092E-03   .6606140E-03
   .6536618E-03   .6491339E-03   .6445209E-03   .6373379E-03   .6276213E-03
   .6157052E-03   .6057516E-03   .5979790E-03   .5885966E-03   .5525409E-03
   .2825749E-03  -.4801349E-03  -.1491397E-02  -.2210520E-02  -.2424429E-02
  -.2303586E-02  -.2123765E-02  -.2056621E-02  -.2110146E-02  -.2205502E-02
  -.2262860E-02  -.2260497E-02  -.2225890E-02  -.2192516E-02  -.2179242E-02
  -.2183764E-02  -.2192636E-02  -.2197613E-02  -.2195184E-02  -.2188113E-02
  -.2183558E-02  -.2186779E-02  -.2195256E-02  -.2202603E-02  -.2206577E-02
  -.2209932E-02  -.2213719E-02  -.2219024E-02  -.2225303E-02  -.2231641E-02
  -.2238210E-02  -.2246237E-02  -.2253256E-02  -.2256605E-02  -.2257791E-02
  -.2258151E-02  -.2256068E-02  -.2219267E-02  -.1987551E-02  -.1761475E-02
  -.1835499E-02  -.2083427E-02  -.2287621E-02  -.2349481E-02  -.2266637E-02
  -.1888346E-02  -.1066891E-02  -.1204297E-03   .4743821E-03   .6155669E-03
   .5037510E-03   .3772676E-03   .3535280E-03   .4205017E-03   .5392783E-03
   .8122738E-03   .1029772E-02   .9237890E-03   .6870158E-03   .7446447E-03
   .1146559E-02   .1349827E-02   .1096516E-02   .7142730E-03   .7442565E-03
   .1455301E-02   .2492463E-02   .3235624E-02   .3445394E-02   .3296977E-02
   .3095821E-02   .3024507E-02   .3086376E-02   .3190863E-02   .3259367E-02
   .3268535E-02   .3238932E-02   .3207263E-02   .3192322E-02   .3196477E-02
   .3209927E-02   .3219071E-02   .3199682E-02   .2998994E-02   .2679078E-02
   .2472168E-02   .2239083E-02   .2213247E-02   .2587231E-02   .3054497E-02
   .3290660E-02   .3051846E-02   .2201443E-02   .1143384E-02   .8362155E-03
   .1671597E-02   .2822318E-02   .3493298E-02   .3530302E-02   .3237135E-02
   .2975451E-02   .2910469E-02   .2981225E-02   .2909445E-02   .2681457E-02
   .2664000E-02   .2673057E-02   .2561549E-02   .2416860E-02   .1916113E-02
   .1145694E-02   .9237453E-03   .1694609E-02   .2750733E-02   .3365810E-02
   .3354847E-02   .2664453E-02   .1429232E-02   .4011146E-03   .1560885E-04
   .1410200E-03   .4048167E-03   .5363396E-03   .4907717E-03   .3671246E-03
   .2736733E-03   .2543215E-03   .2885940E-03   .3312817E-03   .3514074E-03
   .3421521E-03   .2774300E-03  -.7887866E-04  -.1069856E-02  -.2016455E-02
  -.2421802E-02  -.1972725E-02  -.7774994E-03   .2724531E-03   .2951882E-03
  -.8067662E-03  -.2057374E-02  -.2687973E-02  -.2645189E-02  -.2307881E-02
  -.2053294E-02  -.2021882E-02  -.2123273E-02  -.2084180E-02  -.2061330E-02
  -.2536871E-02  -.3184905E-02  -.3437038E-02  -.3245977E-02  -.2986934E-02
  -.2868696E-02  -.3317857E-02  -.4172697E-02  -.4496767E-02  -.3771316E-02
  -.2701842E-02  -.2077259E-02  -.2403818E-02  -.3416562E-02  -.3903392E-02
  -.3438911E-02  -.2612848E-02  -.2056007E-02  -.1956609E-02  -.2138222E-02
  -.2334948E-02  -.2386492E-02  -.2151079E-02  -.1407723E-02  -.2129032E-03
   .9208112E-03   .1575956E-02   .2177114E-02   .2716954E-02   .2758584E-02
   .1962204E-02   .9310944E-03   .3173139E-03   .2447939E-03   .4567003E-03
   .6582331E-03   .8370205E-03   .1178176E-02   .1555879E-02   .1916961E-02
   .2273396E-02   .2426007E-02   .2613046E-02   .2860736E-02   .3048524E-02
   .3122421E-02   .3118690E-02   .3200884E-02   .3695309E-02   .4525332E-02
   .4885928E-02   .4261417E-02   .2953509E-02   .1710185E-02   .8670157E-03
   .5734687E-03   .8014677E-03   .8700954E-03   .3309329E-03  -.3706461E-03
  -.5189770E-03  -.1283205E-03   .3382169E-03   .4605695E-03  -.6243596E-04
  -.9120295E-03  -.1066600E-02  -.4559904E-03   .1711708E-03   .1306456E-03
  -.5326237E-03  -.1490248E-02  -.2247377E-02  -.2525579E-02  -.2431796E-02
  -.2237567E-02  -.2140168E-02  -.2172084E-02  -.2262712E-02  -.2334940E-02
  -.2370251E-02  -.2367545E-02  -.2342124E-02  -.2260292E-02  -.1900989E-02
  -.1364039E-02  -.9691343E-03  -.8070639E-03  -.5615626E-03  -.2604048E-03
  -.5268695E-03  -.1113885E-02  -.1574349E-02  -.1318141E-02  -.4987096E-03
   .1055826E-04   .1472792E-03   .2034573E-03   .2656360E-03   .3362544E-03
   .4027686E-03   .4996055E-03   .8059665E-03   .1047235E-02   .1199935E-02
   .1236179E-02   .1605826E-02   .2359540E-02   .3007690E-02   .3271227E-02
   .3215480E-02   .3014817E-02   .2667463E-02   .2453925E-02   .2655884E-02
   .3293414E-02   .4285334E-02   .5231445E-02   .5709116E-02   .5705451E-02
   .5508814E-02   .5378953E-02   .5391329E-02   .5517676E-02   .5878512E-02
   .6609378E-02   .7439615E-02   .7960444E-02   .8073401E-02   .7942424E-02
   .7786003E-02   .7719699E-02   .7735261E-02   .7734871E-02   .7509859E-02
   .7246026E-02   .7216845E-02   .7100264E-02   .6524096E-02   .5696362E-02
   .5120822E-02   .5156836E-02   .5648899E-02   .5954260E-02   .5699326E-02
   .5179101E-02   .4788223E-02   .4670576E-02   .4719834E-02   .4597497E-02
   .3968520E-02   .3022116E-02   .2296795E-02   .2046920E-02   .2100334E-02
   .1861209E-02   .9990413E-03   .7721848E-04  -.2687498E-03  -.6263028E-04
   .9347597E-04  -.2877012E-04  -.6089749E-03  -.1639898E-02  -.2490610E-02
  -.2507773E-02  -.1788158E-02  -.1375142E-02  -.1702581E-02  -.2347029E-02
  -.2803660E-02  -.2899282E-02  -.2760130E-02  -.2590119E-02  -.2514674E-02
  -.2536724E-02  -.2594322E-02  -.2631170E-02  -.2627488E-02  -.2595518E-02
  -.2538478E-02  -.2249592E-02  -.1465405E-02  -.6102088E-03  -.1373029E-03
  -.1063499E-03  -.3973883E-03  -.7990533E-03  -.8557833E-03  -.5911757E-03
  -.2913285E-03  -.1534414E-03  -.1848845E-03  -.2849624E-03  -.3568632E-03
  -.3634371E-03  -.3291958E-03  -.2925006E-03  -.2759472E-03  -.2827513E-03
  -.2990907E-03  -.3241786E-03  -.4737856E-03  -.9857856E-03  -.1676346E-02
  -.2063174E-02  -.2015222E-02  -.1366934E-02  -.5875713E-03  -.3173936E-03
  -.9631196E-03  -.2010916E-02  -.2724536E-02  -.2864057E-02  -.2643249E-02
  -.2392143E-02  -.2297499E-02  -.2354058E-02  -.2458101E-02  -.2517497E-02
  -.2508762E-02  -.2461037E-02  -.2414822E-02  -.2390559E-02  -.2388430E-02
  -.2393855E-02  -.2395576E-02  -.2388379E-02  -.2375761E-02  -.2361905E-02
  -.2349307E-02  -.2340302E-02  -.2338126E-02  -.2350132E-02  -.2366653E-02
  -.2373217E-02  -.2363708E-02  -.2347034E-02  -.2329548E-02  -.2315925E-02
  -.2302176E-02  -.2271483E-02  -.2229192E-02  -.2191304E-02  -.2167612E-02
  -.2154875E-02  -.2147652E-02  -.2139861E-02  -.2129450E-02  -.2115400E-02
  -.2102250E-02  -.2086977E-02  -.2057446E-02  -.2017133E-02  -.1983569E-02
  -.1963887E-02  -.1954473E-02  -.1946978E-02  -.1936765E-02  -.1922868E-02
  -.1907056E-02  -.1892903E-02  -.1879749E-02  -.1867403E-02  -.1855008E-02
  -.1842477E-02  -.1829931E-02  -.1819443E-02  -.1809207E-02  -.1799566E-02
  -.1790115E-02  -.1783071E-02  -.1785678E-02  -.1787063E-02  -.1753330E-02
  -.1546306E-02  -.1170062E-02  -.8513178E-03  -.7186431E-03  -.7109714E-03
  -.5770263E-03  -.2474622E-03   .4469871E-04   .3003673E-04  -.1404674E-03
  -.1660156E-03  -.5723776E-04   .6659769E-04   .1273135E-03   .1183862E-03
   .7890136E-04   .4577407E-04   .3475719E-04   .3974313E-04   .4581452E-04
   .3599281E-04   .1279874E-04  -.6476912E-05  -.2649208E-04  -.4266429E-04
  -.5296586E-04  -.5607044E-04  -.5671092E-04  -.6560594E-04  -.8617747E-04
  -.9277749E-04   .2415775E-04   .2109173E-03   .2028209E-03   .4300078E-04
  -.1090250E-03  -.1666373E-03  -.1424905E-03  -.9217329E-04  -.5966028E-04
  -.4774447E-04   .3311094E-04   .2217892E-03   .3395611E-03   .3994123E-03
   .3629967E-03   .3360623E-03   .2133002E-03   .4009055E-04  -.7784184E-04
  -.1048509E-03  -.7558710E-04  -.3910769E-04  -.2395856E-04  -.2315606E-04
  -.1325747E-04   .1336420E-04   .1208057E-03   .3288994E-03   .5261373E-03
   .9092032E-03   .1365680E-02   .1603246E-02   .1504212E-02   .1385028E-02
   .1427177E-02   .1559104E-02   .1664423E-02   .1690460E-02   .1653957E-02
   .1594976E-02   .1487922E-02   .1173498E-02   .6392454E-03   .1621465E-03
  -.5369100E-04  -.3650032E-04   .6251185E-04   .1227340E-03   .1107882E-03
   .6078945E-04   .1880955E-04   .5963546E-05   .1732526E-04   .3424895E-04
   .4540792E-04   .5842101E-04   .7271351E-04   .8126656E-04   .8308979E-04
   .8011265E-04   .7450600E-04   .6368017E-04   .8505471E-04   .2355212E-03
   .3359747E-03   .2674658E-03   .1264381E-03   .2522721E-04   .1563189E-05
   .2903209E-04   .6176709E-04   .7370223E-04   .6442066E-04   .4751021E-04
   .3598750E-04   .3357751E-04   .3706194E-04   .4067041E-04   .4153858E-04
   .4052505E-04   .6766833E-04   .2883588E-03   .5032921E-03   .4141313E-03
   .1529843E-03  -.5487216E-04  -.1164083E-03  -.6924805E-04  -.2851271E-07
   .3190683E-04   .2158450E-04  -.8984311E-05  -.6903464E-04  -.3309696E-03
  -.7540097E-03  -.8765392E-03  -.5553152E-03  -.1610191E-03  -.1703324E-03
  -.6206123E-03  -.1110198E-02  -.1346413E-02  -.1316904E-02  -.1173837E-02
  -.1064444E-02  -.1042057E-02  -.1076467E-02  -.1113534E-02  -.1110654E-02
  -.9902875E-03  -.6637565E-03  -.2335085E-03   .6952932E-04   .1565759E-03
   .1006251E-03   .2211928E-04  -.8834587E-05   .9971443E-05   .4500753E-04
   .6691425E-04   .6846673E-04   .5737792E-04   .4420715E-04   .3559904E-04
   .3251468E-04   .3134086E-04   .3085740E-04   .2900776E-04   .2715248E-04
   .2492976E-04   .2235202E-04   .1860371E-04   .1469484E-04   .1253621E-04
   .1175365E-04   .1074002E-04   .7595973E-05   .3751749E-05   .8800715E-06
  -.9193902E-06  -.1428497E-05  -.2041699E-05  -.2449805E-05  -.3222477E-05
   .9233200E-06   .1178871E-04   .2238139E-04   .2657901E-04   .2481618E-04
   .2086429E-04   .1741676E-04   .1595561E-04   .1561995E-04   .1514912E-04
   .1472079E-04   .1476751E-04   .1455951E-04   .1033651E-04  -.1330986E-05
  -.1363394E-04  -.1970705E-04  -.1887215E-04  -.1568591E-04  -.1281535E-04
  -.1210505E-04  -.1224579E-04  -.1278995E-04  -.1178597E-04  -.9824261E-05
  -.7796551E-05  -.5984469E-05  -.4343333E-05  -.3593234E-05  -.3196767E-05
  -.7752587E-05  -.5414711E-04  -.2175289E-03  -.4649997E-03  -.6546313E-03
  -.6768282E-03  -.4908562E-03  -.1949456E-03   .2341592E-04   .1655284E-04
  -.2439809E-03  -.5435562E-03  -.6948313E-03  -.6810129E-03  -.5921132E-03
  -.5200599E-03  -.5005920E-03  -.5171033E-03  -.5362387E-03  -.5373685E-03
  -.5199852E-03  -.4954006E-03  -.4737284E-03  -.4596907E-03  -.4511041E-03
  -.4434677E-03  -.4339520E-03  -.4227405E-03  -.4088678E-03  -.3700175E-03
  -.3032625E-03  -.2862182E-03  -.3199726E-03  -.3564552E-03  -.3391515E-03
  -.2142968E-03  -.1626110E-04   .1415110E-03   .1994377E-03   .1804437E-03
   .1408935E-03   .1202383E-03   .1245639E-03   .1394627E-03   .1500283E-03
   .1517212E-03   .1499399E-03   .1472729E-03   .1428583E-03   .1401823E-03
   .1406770E-03   .1412872E-03   .1407174E-03   .1386071E-03   .1355056E-03
   .1325195E-03   .1304526E-03   .1285428E-03   .1259165E-03   .1220847E-03
   .1157813E-03   .1086456E-03   .1032224E-03   .1009993E-03   .1005300E-03
   .1023152E-03   .1192934E-03   .1843233E-03   .2967734E-03   .3957377E-03
   .4357680E-03   .4227040E-03   .3902508E-03   .3659886E-03   .3572189E-03
   .3567804E-03   .3545145E-03   .3462998E-03   .3335216E-03   .3194793E-03
   .3068633E-03   .2964674E-03   .2877922E-03   .2796196E-03   .2711619E-03
   .2621702E-03   .2527838E-03   .2433187E-03   .2338757E-03   .2242929E-03
   .2133656E-03   .2024527E-03   .1919454E-03   .1736867E-03   .1309288E-03
   .7989784E-04   .3764870E-04  -.5514530E-05  -.4399934E-04  -.6675773E-04
  -.7314932E-04  -.7020208E-04  -.6648787E-04  -.6719484E-04  -.7086111E-04
  -.7387187E-04  -.7367171E-04  -.7134770E-04  -.6872338E-04  -.6745156E-04
  -.7393906E-04  -.1058649E-03  -.1623405E-03  -.2124323E-03  -.2331853E-03
  -.2271644E-03  -.2100859E-03  -.1958748E-03  -.1891079E-03  -.1871666E-03
  -.1858087E-03  -.1875286E-03  -.2166407E-03  -.2618222E-03  -.2901147E-03
  -.2898796E-03  -.2714615E-03  -.2504821E-03  -.2355601E-03  -.2257765E-03
  -.2087807E-03  -.1946806E-03  -.1915882E-03  -.1919481E-03  -.1881597E-03
  -.1743113E-03  -.1360404E-03  -.8586792E-04  -.5028868E-04  -.3787504E-04
  -.3987688E-04  -.4350591E-04  -.4182488E-04  -.3500925E-04  -.2676868E-04
  -.1857979E-04  -.2562983E-05   .2443248E-04   .4439520E-04   .5432964E-04
   .6001785E-04   .6282417E-04   .6373547E-04   .6386340E-04   .6388440E-04
   .6413169E-04   .6439188E-04   .6480801E-04   .6504939E-04   .6497529E-04
   .6489568E-04   .6433035E-04   .6346106E-04   .6282000E-04   .6311776E-04
   .6395725E-04   .6585773E-04   .7601842E-04   .9336474E-04   .1052641E-03
   .9958081E-04   .7984278E-04   .6187940E-04   .5538359E-04   .6163507E-04
   .7434175E-04   .8634760E-04   .9404570E-04   .9567588E-04   .9310384E-04
   .8964826E-04   .8704419E-04   .8550095E-04   .8454903E-04   .8342457E-04
   .8172836E-04   .7961254E-04   .7747146E-04   .7551178E-04   .7385267E-04
   .7237696E-04   .7082655E-04   .6916398E-04   .6707291E-04   .6300734E-04
   .5575936E-04   .4802870E-04   .4341930E-04   .4255101E-04   .4364619E-04
   .4481113E-04   .4498050E-04   .4432715E-04   .4368792E-04   .4328678E-04
   .4325921E-04   .4333694E-04   .4335028E-04   .4315672E-04   .4284977E-04
   .4257075E-04   .4222157E-04   .4192807E-04   .4163421E-04   .4132434E-04
   .4102433E-04   .4080619E-04   .4064490E-04   .4042377E-04   .4018190E-04
   .3985609E-04   .3947785E-04   .3906445E-04   .3870269E-04   .3843287E-04
   .3819416E-04   .3790666E-04   .3754498E-04   .3715180E-04   .3680962E-04
   .3643982E-04   .3578764E-04   .3455076E-04   .3307039E-04   .3240199E-04
   .3301604E-04   .3426510E-04   .3503686E-04   .3498606E-04   .3437882E-04
   .3354424E-04   .3268938E-04   .3224402E-04   .3230460E-04   .3246712E-04
   .3235667E-04   .3191898E-04   .3135245E-04   .3082777E-04   .3042032E-04
   .3005620E-04   .2964262E-04   .2919178E-04   .2870701E-04   .2821529E-04
   .2772524E-04   .2723251E-04   .2672802E-04   .2621226E-04   .2570609E-04
   .2520873E-04   .2471102E-04   .2420563E-04   .2369011E-04   .2318598E-04
   .2269294E-04   .2221402E-04   .2172785E-04   .2123855E-04   .2075519E-04
   .2027347E-04   .1980098E-04   .1932689E-04   .1886542E-04   .1841197E-04
   .1797365E-04   .1755036E-04   .1713912E-04   .1674256E-04   .1635813E-04
   .1599058E-04   .1564035E-04   .1530671E-04   .1499135E-04   .1469326E-04
   .1441270E-04   .1415164E-04   .1391207E-04   .1369564E-04   .1350240E-04
   .1333029E-04   .1317985E-04   .1305175E-04   .1294629E-04   .1286461E-04
   .1280791E-04   .1277605E-04   .1276955E-04   .1278908E-04   .1283550E-04
   .1290978E-04
